# Supplementary material for: Subcellular proteomics of dopamine neurons in the mouse brain
Source: eLife journal article supplement (doi:10.7554/elife.70921), 2022-01-31
Supplement: fig4-data1 [file Figure4a_LabeledBlots.pdf › Figure4a_LabeledBlots.pdf]

## Figure 4a Western Blots

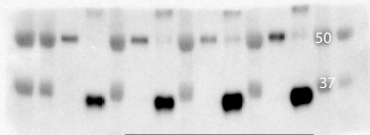

Figure 4a lanes

Probes  
anti-BIII-tubulin, ~50 kDa  
anti-synaptophysin, ~ 37 kDa

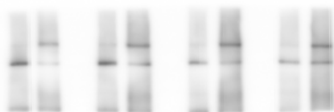

Figure 4a lanes

Strep HRP

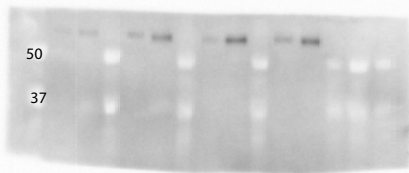

Figure 4a lanes

anti-Tyrosine Hydroxylase  
~60 kDa
