# Supplementary material for: Subcellular proteomics of dopamine neurons in the mouse brain
Source: eLife journal article supplement (doi:10.7554/elife.70921), 2022-01-31
Supplement: fig5-data4 [file elife-70921-fig5-data4-v2.zip]

## Figure 5b Western Blots

Raw  
Strep HRP

2 more Ctrl  
(see Fig 5d)

Figure 5b  
lanes

Unrelated  
samples

High Contrast  
Strep HRP

2 more Ctrl  
(see Fig 5d)

Figure 5b  
lanes

Unrelated  
samples
