# Supplementary material for: Subcellular proteomics of dopamine neurons in the mouse brain
Source: eLife. 2022 Jan 31;11:e70921. doi: 10.7554/eLife.70921 (PMC8860448; doi:10.7554/eLife.70921)
Supplement: Figure 2—source data 1. [file elife-70921-fig2-data1.xlsx]

## Sheet: Sheet1
Figure 2 -- source data 1
Protein abbreviations related to Figure 2f-g
Abbrev. in panel f	Protein Name	Mouse Gene Symbol
Tubulin α-1B	Tubulin alpha-1B chain	Tuba1b
Tubulin α-4a	Tubulin alpha-4A chain	Tuba4a
Tubulin β-2a	Tubulin beta-2A chain	Tubb2a
Tubulin β-4b	Tubulin beta-4B chain	Tubb4b
HSP 90-beta	Heat shock protein HSP 90-beta	Hspa90ab1
Gamma-actin	Actin, cytoplasmic 2	Actg1
Tubulin β-6	Tubulin beta-6 chain	Tubb6
Tubulin α-3a	Tubulin alpha-3 chain	Tuba3a
MAP-2	Microtubule-associated protein 2	Map2
GAPDH	Glyceraldehyde 3-phoshate dehydrogenase	Gapdh
DRP-2	Dihydropyrimidinase-related protein 2	Dpysl2
Synaptophysin	Synaptophysin	Syp
β-synuclein	Beta-synuclein	Sncb
α-synuclein	Alpha-synuclein	Snca
Synaptogyrin3	Synaptogyrin-3	Syngr3
Clathrin hc1	Clathrin heavy chain 1	Cltc
Transgelin-3	Transgelin-3	Tagln3
Abbrev. in panel g	Protein Name	Mouse Gene Symbol
TH	Tyrosine hydroxylase	Th
DAT	Dopamine transporter	Slc6a3
AADC	Aromatic l-amino acid decarboxylase	Ddc
VMAT2	Vesicular monoamine transporter 2	Slc18a2
SLC10A4	Solute carrier family 10 member 4 (Sodium/bile acid cotransporter 4)	Slc10a4
GTP-CH-1	GTP cyclohydrolase 1	Gch1
Copine-7	Copine-7	Cpne7
RET	Proto-oncogene tyrosine-protein kinase receptor Ret	Ret
nAchR-α4	Nicotinic acetylcholine receptor α4 subunit	Chrna4
ALDH1A1	Aldehyde dehydrogenase 1 family member A1	Aldh1a1
γ-synuclein	Gamma-synuclein	Sncg
GFAP	Glial fibrillary acidic protein	Gfap
ALDH1L1	Aldehyde dehydrogenase 1 family member L1	Aldh1l1
MAG	Myelin-associated glycoprotein	Mag
MOG	Myelin-oligodendrocyte glycoprotein	Mog
MBP	Myelin basic protein	Mbp
IBA1	Ionized calcium-binding adapter molecule 1 (AIF-1)	Aif1
DARPP32	Dopamine- and cAMP-regulated neuronal phosphoprotein	Ppp1r1b
Protachykin.-1	Protachykinin-1 (PPT)	Tac1
GAD-67	Glutamate decarboxylase 1	Gad1
GPR88	probable G-protein coupled receptor 88	Gpr88
ARPP-21	cAMP-regulated phosphoprotein 21	Arpp21
DA D1R	Dopamine D1 receptor	Drd1
Proenkeph.-B	Proenkephalin-B (Prodynorphin)	Pdyn
Proenkeph.-A	Proenkephalin-A (Proenkephlain)	Penk
ChAT	Choline O-acetyltransferase	Chat
VAChT	Vesicular acetylcholine transporter	Slc18a3
VGluT3	Vesicular glutamate transporter 3	Slc17a8
