# Supplementary material for: Subcellular proteomics of dopamine neurons in the mouse brain
Source: eLife. 2022 Jan 31;11:e70921. doi: 10.7554/eLife.70921 (PMC8860448; doi:10.7554/eLife.70921)
Supplement: Figure 2—source data 2. [file elife-70921-fig2-data2.xlsx]

## Sheet: APEX2_SampleInfo
SampleID	SampIndex	Set	Mouse	Region	Genotype	Fraction	TechRep	Condition
C1VM_Control_VM_S1	56	3	C1	VM	DATcre.noVirus	BiotinIP	.NA	.NA
C2VM_Control_VM_S2	57	3	C2	VM	DATcre.noVirus	BiotinIP	.NA	.NA
C3VM_Control_VM_S3	58	3	C3	VM	DATcre.noVirus	BiotinIP	.NA	.NA
C4VM_Control_VM_S4	59	3	C4	VM	DATcre.noVirus	BiotinIP	.NA	.NA
A3VM_APEX_VM_S5	60	3	A3	VM	DATcre.APEX	BiotinIP	.NA	.NA
A4VM_APEX_VM_S6	61	3	A4	VM	DATcre.APEX	BiotinIP	.NA	.NA
A5VM_APEX_VM_S7	62	3	A5	VM	DATcre.APEX	BiotinIP	.NA	.NA
A6VM_APEX_VM_S8	63	3	A6	VM	DATcre.APEX	BiotinIP	.NA	.NA
C1MFB_Control_MFB_S9	64	3	C1	MFB	DATcre.noVirus	BiotinIP	.NA	.NA
C2MFB_Control_MFB_S10	65	3	C2	MFB	DATcre.noVirus	BiotinIP	.NA	.NA
C3MFB_Control_MFB_S11	66	3	C3	MFB	DATcre.noVirus	BiotinIP	.NA	.NA
C4MFB_Control_MFB_S12	67	3	C4	MFB	DATcre.noVirus	BiotinIP	.NA	.NA
A3MFB_APEX_MFB_S13	68	3	A3	MFB	DATcre.APEX	BiotinIP	.NA	.NA
A4MFB_APEX_MFB_S14	69	3	A4	MFB	DATcre.APEX	BiotinIP	.NA	.NA
A5MFB_APEX_MFB_S15	70	3	A5	MFB	DATcre.APEX	BiotinIP	.NA	.NA
A6MFB_APEX_MFB_S16	71	3	A6	MFB	DATcre.APEX	BiotinIP	.NA	.NA
C1Str_Control_Str_S17	72	3	C1	Str	DATcre.noVirus	BiotinIP	.NA	.NA
C1Str_Control_Str_S18	73	3	C2	Str	DATcre.noVirus	BiotinIP	.NA	.NA
C1Str_Control_Str_S19	74	3	C3	Str	DATcre.noVirus	BiotinIP	.NA	.NA
C1Str_Control_Str_S20	75	3	C4	Str	DATcre.noVirus	BiotinIP	.NA	.NA
A3Str_APEX_Str_S21	76	3	A3	Str	DATcre.APEX	BiotinIP	.NA	.NA
A4Str_APEX_Str_S22	77	3	A4	Str	DATcre.APEX	BiotinIP	.NA	.NA
A5Str_APEX_Str_S23	78	3	A5	Str	DATcre.APEX	BiotinIP	.NA	.NA
A6Str_APEX_Str_S24	79	3	A6	Str	DATcre.APEX	BiotinIP	.NA	.NA
C5P2_Control_Syn_S25	80	3	C5	Syn	DATcre.noVirus	BiotinIP	.NA	.NA
C6P2_Control_Syn_S26	81	3	C6	Syn	DATcre.noVirus	BiotinIP	.NA	.NA
C7P2_Control_Syn_S27	82	3	C7	Syn	DATcre.noVirus	BiotinIP	.NA	.NA
C8P2_Control_Syn_S28	83	3	C8	Syn	DATcre.noVirus	BiotinIP	.NA	.NA
A2P2_Apex_Syn_S29	84	3	A2	Syn	DATcre.APEX	BiotinIP	.NA	.NA
A3P2_Apex_Syn_S30	85	3	A3	Syn	DATcre.APEX	BiotinIP	.NA	.NA

## Sheet: APEX2_ProteinsMeta
ProteinAccessions	Genes	ProteinDescriptions	ProteinNames
A1L314	Mpeg1	Macrophage-expressed gene 1 protein	MPEG1_MOUSE
A2A690;A2A690-2	Tanc2	Protein TANC2;Isoform 2 of Protein TANC2	TANC2_MOUSE
A2A699	Fam171a2	Protein FAM171A2	F1712_MOUSE
A2A8Z1;A2A8Z1-2	Osbpl9	Oxysterol-binding protein-related protein 9;Isoform 2 of Oxysterol-binding protein-related protein 9	OSBL9_MOUSE
A2ADY9	Ddi2	Protein DDI1 homolog 2	DDI2_MOUSE
A2AG50	Map7d2	MAP7 domain-containing protein 2	MA7D2_MOUSE
A2AGT5;A2AGT5-2;A2AGT5-3	Ckap5	Cytoskeleton-associated protein 5;Isoform 2 of Cytoskeleton-associated protein 5;Isoform 3 of Cytoskeleton-associated protein 5	CKAP5_MOUSE
A2AHC3	Camsap1	Calmodulin-regulated spectrin-associated protein 1	CAMP1_MOUSE
A2AJA9	Ajm1	Apical junction component 1 homolog	AJM1_MOUSE
A2AJI0	Map7d1	MAP7 domain-containing protein 1	MA7D1_MOUSE
A2AKB4	Frmpd1	FERM and PDZ domain-containing protein 1	FRPD1_MOUSE
A2ALS5;A2ALS5-2;A2ALS5-3	Rap1gap	Rap1 GTPase-activating protein 1;Isoform 2 of Rap1 GTPase-activating protein 1;Isoform 3 of Rap1 GTPase-activating protein 1	RPGP1_MOUSE
A2ALU4;A2ALU4-2	Shroom2	Protein Shroom2;Isoform 2 of Protein Shroom2	SHRM2_MOUSE
A2AN08;A2AN08-3;A2AN08-5	Ubr4	E3 ubiquitin-protein ligase UBR4;Isoform 3 of E3 ubiquitin-protein ligase UBR4;Isoform 5 of E3 ubiquitin-protein ligase UBR4	UBR4_MOUSE
A2APX8;A2APX8-2;A2APX8-3	Scn1a	Sodium channel protein type 1 subunit alpha;Isoform 2 of Sodium channel protein type 1 subunit alpha;Isoform 3 of Sodium channel protein type 1 subunit alpha	SCN1A_MOUSE
A2AQ07	Tubb1	Tubulin beta-1 chain	TBB1_MOUSE
A2AQ25;A2AQ25-2;A2AQ25-3;A2AQ25-4;A2AQ25-5;A2AQ25-6;A2AQ25-8;A2AQ25-9	Skt	Sickle tail protein;Isoform 2 of Sickle tail protein;Isoform 3 of Sickle tail protein;Isoform 4 of Sickle tail protein;Isoform 5 of Sickle tail protein;Isoform 6 of Sickle tail protein;Isoform 8 of Sickle tail protein;Isoform 9 of Sickle tail protein	SKT_MOUSE
A2ARP1;A2ARP1-2;A2ARP1-3;A2ARP1-7	Ppip5k1	Inositol hexakisphosphate and diphosphoinositol-pentakisphosphate kinase 1;Isoform 2 of Inositol hexakisphosphate and diphosphoinositol-pentakisphosphate kinase 1;Isoform 3 of Inositol hexakisphosphate and diphosphoinositol-pentakisphosphate kinase 1;Isoform 6 of Inositol hexakisphosphate and diphosphoinositol-pentakisphosphate kinase 1	VIP1_MOUSE
A2ARS0	Ankrd63	Ankyrin repeat domain-containing protein 63	ANR63_MOUSE
A2AWA9	Rabgap1	Rab GTPase-activating protein 1	RBGP1_MOUSE
A2CG49;A2CG49-2;A2CG49-7	Kalrn	Kalirin;Isoform 2 of Kalirin;Isoform 7 of Kalirin	KALRN_MOUSE
A2RT62	Fbxl16	F-box/LRR-repeat protein 16	FXL16_MOUSE
A3KMP2;A3KMP2-2	Ttc38	Tetratricopeptide repeat protein 38;Isoform 2 of Tetratricopeptide repeat protein 38	TTC38_MOUSE
A6H5Z3	Exoc6b	Exocyst complex component 6B	EXC6B_MOUSE
A6H6A9	Rabgap1l	Rab GTPase-activating protein 1-like	RBG1L_MOUSE
B0V2N1;B0V2N1-2;B0V2N1-3;B0V2N1-4;B0V2N1-6	Ptprs	Receptor-type tyrosine-protein phosphatase S;Isoform 2 of Receptor-type tyrosine-protein phosphatase S;Isoform 3 of Receptor-type tyrosine-protein phosphatase S;Isoform 4 of Receptor-type tyrosine-protein phosphatase S;Isoform 6 of Receptor-type tyrosine-protein phosphatase S	PTPRS_MOUSE
B1AUH1;B1AUH1-2	Ptpru	Receptor-type tyrosine-protein phosphatase U;Isoform 2 of Receptor-type tyrosine-protein phosphatase U	PTPRU_MOUSE
B1AVZ0	Uprt	Uracil phosphoribosyltransferase homolog	UPP_MOUSE
B1AWN6	Scn2a	Sodium channel protein type 2 subunit alpha	SCN2A_MOUSE
B1AXV0	Frrs1l	DOMON domain-containing protein FRRS1L	FRS1L_MOUSE
B1AY13	Usp24	Ubiquitin carboxyl-terminal hydrolase 24	UBP24_MOUSE
B1AZP2;B1AZP2-2	Dlgap4	Disks large-associated protein 4;Isoform 2 of Disks large-associated protein 4	DLGP4_MOUSE
B2RSH2	Gnai1	Guanine nucleotide-binding protein G(i) subunit alpha-1	GNAI1_MOUSE
B2RUJ5;B2RUJ5-3	Apba1	Amyloid-beta A4 precursor protein-binding family A member 1;Isoform 3 of Amyloid-beta A4 precursor protein-binding family A member 1	APBA1_MOUSE
B8JK39	Itga9	Integrin alpha-9	ITA9_MOUSE
B9EJ80	Pdzd8	PDZ domain-containing protein 8	PDZD8_MOUSE
B9EJ86	Osbpl8	Oxysterol-binding protein-related protein 8	OSBL8_MOUSE
B9EKR1	Ptprz1	Receptor-type tyrosine-protein phosphatase zeta	PTPRZ_MOUSE
D3YVE8	Slc35g2	Solute carrier family 35 member G2	S35G2_MOUSE
D3YVF0	Akap5	A-kinase anchor protein 5	AKAP5_MOUSE
D3YZP9	Ccdc6	Coiled-coil domain-containing protein 6	CCDC6_MOUSE
D3YZU1	Shank1	SH3 and multiple ankyrin repeat domains protein 1	SHAN1_MOUSE
D3Z4S3	Ptrhd1	Putative peptidyl-tRNA hydrolase PTRHD1	PTRD1_MOUSE
D3Z7P3	Gls	Glutaminase kidney isoform, mitochondrial	GLSK_MOUSE
D3Z7Q2	Smim20	Small integral membrane protein 20	SIM20_MOUSE
E9PUL5	Prrt2	Proline-rich transmembrane protein 2	PRRT2_MOUSE
E9Q0C6	Kiaa1210	Acrosomal protein KIAA1210	K1210_MOUSE
E9Q3L2	Pi4ka	Phosphatidylinositol 4-kinase alpha	PI4KA_MOUSE
E9Q4Z2	Acacb	Acetyl-CoA carboxylase 2	ACACB_MOUSE
E9Q557	Dsp	Desmoplakin	DESP_MOUSE
E9Q7X7	Nrxn2	Neurexin-2	NRX2A_MOUSE
E9Q8I9;E9Q8I9-2	Fry	Protein furry homolog;Isoform 2 of Protein furry homolog	FRY_MOUSE
F6SEU4	Syngap1	Ras/Rap GTPase-activating protein SynGAP	SYGP1_MOUSE
F8VPU2	Farp1	FERM, ARHGEF and pleckstrin domain-containing protein 1	FARP1_MOUSE
G3X9C2	Nccrp1	F-box only protein 50	FBX50_MOUSE
G3X9K3	Arfgef1	Brefeldin A-inhibited guanine nucleotide-exchange protein 1	BIG1_MOUSE
G3XA57;G3XA57-2	Rab11fip2	Rab11 family-interacting protein 2;Isoform 2 of Rab11 family-interacting protein 2	RFIP2_MOUSE
G5E829	Atp2b1	Plasma membrane calcium-transporting ATPase 1	AT2B1_MOUSE
G5E897	Poglut3	Protein O-glucosyltransferase 3	PLGT3_MOUSE
G5E8K5;G5E8K5-2;G5E8K5-3	Ank3	Ankyrin-3;Isoform 2 of Ankyrin-3;Isoform 3 of Ankyrin-3	ANK3_MOUSE
O08529	Capn2	Calpain-2 catalytic subunit	CAN2_MOUSE
O08530	S1pr1	Sphingosine 1-phosphate receptor 1	S1PR1_MOUSE
O08532-4;O08532-5	Cacna2d1	Isoform 2D of Voltage-dependent calcium channel subunit alpha-2/delta-1;Isoform 2E of Voltage-dependent calcium channel subunit alpha-2/delta-1	CA2D1_MOUSE
O08539	Bin1	Myc box-dependent-interacting protein 1	BIN1_MOUSE
O08547	Sec22b	Vesicle-trafficking protein SEC22b	SC22B_MOUSE
O08553	Dpysl2	Dihydropyrimidinase-related protein 2	DPYL2_MOUSE
O08576;O08576-2;O08576-3;O08576-4	Rundc3a	RUN domain-containing protein 3A;Isoform 2 of RUN domain-containing protein 3A;Isoform 3 of RUN domain-containing protein 3A;Isoform 4 of RUN domain-containing protein 3A	RUN3A_MOUSE
O08579	Emd	Emerin	EMD_MOUSE
O08582	Gtpbp1	GTP-binding protein 1	GTPB1_MOUSE
O08585	Clta	Clathrin light chain A	CLCA_MOUSE
O08586	Pten	Phosphatidylinositol 3,4,5-trisphosphate 3-phosphatase and dual-specificity protein phosphatase PTEN	PTEN_MOUSE
O08599	Stxbp1	Syntaxin-binding protein 1	STXB1_MOUSE
O08599-2	Stxbp1	Isoform 2 of Syntaxin-binding protein 1	STXB1_MOUSE
O08601;O08601-2	Mttp	Microsomal triglyceride transfer protein large subunit;Isoform 2 of Microsomal triglyceride transfer protein large subunit	MTP_MOUSE
O08709	Prdx6	Peroxiredoxin-6	PRDX6_MOUSE
O08715;O08715-2;O08715-3;O08715-4;O08715-5;O08715-6	Akap1	A-kinase anchor protein 1, mitochondrial;Isoform 1 of A-kinase anchor protein 1, mitochondrial;Isoform 2 of A-kinase anchor protein 1, mitochondrial;Isoform 4 of A-kinase anchor protein 1, mitochondrial;Isoform 5 of A-kinase anchor protein 1, mitochondrial;Isoform 6 of A-kinase anchor protein 1, mitochondrial	AKAP1_MOUSE
O08749	Dld	Dihydrolipoyl dehydrogenase, mitochondrial	DLDH_MOUSE
O08756	Hsd17b10	3-hydroxyacyl-CoA dehydrogenase type-2	HCD2_MOUSE
O08759;O08759-2	Ube3a	Ubiquitin-protein ligase E3A;Isoform 2 of Ubiquitin-protein ligase E3A	UBE3A_MOUSE
O08788;O08788-2	Dctn1	Dynactin subunit 1;Isoform 2 of Dynactin subunit 1	DCTN1_MOUSE
O08795;O08795-2	Prkcsh	Glucosidase 2 subunit beta;Isoform 2 of Glucosidase 2 subunit beta	GLU2B_MOUSE
O08807	Prdx4	Peroxiredoxin-4	PRDX4_MOUSE
O08808	Diaph1	Protein diaphanous homolog 1	DIAP1_MOUSE
O08810	Eftud2	116 kDa U5 small nuclear ribonucleoprotein component	U5S1_MOUSE
O08848	RO60	60 kDa SS-A/Ro ribonucleoprotein	RO60_MOUSE
O08917	Flot1	Flotillin-1	FLOT1_MOUSE
O08919	Numbl	Numb-like protein	NUMBL_MOUSE
O08967;P63034;P63034-2;P63034-3;Q9QX11;Q9QX11-2	Cyth3;Cyth2;Cyth2;Cyth2;Cyth1;Cyth1	Cytohesin-3;Cytohesin-2;Isoform 2 of Cytohesin-2;Isoform 3 of Cytohesin-2;Cytohesin-1;Isoform 2 of Cytohesin-1	CYH3_MOUSE;CYH2_MOUSE;CYH2_MOUSE;CYH2_MOUSE;CYH1_MOUSE;CYH1_MOUSE
O08997	Atox1	Copper transport protein ATOX1	ATOX1_MOUSE
O09012;O09012-2	Pex5	Peroxisomal targeting signal 1 receptor;Isoform 2 of Peroxisomal targeting signal 1 receptor	PEX5_MOUSE
O09061	Psmb1	Proteasome subunit beta type-1	PSB1_MOUSE
O09111	Ndufb11	NADH dehydrogenase [ubiquinone] 1 beta subcomplex subunit 11, mitochondrial	NDUBB_MOUSE
O09114;O09114-2	Ptgds	Prostaglandin-H2 D-isomerase;Isoform 2 of Prostaglandin-H2 D-isomerase	PTGDS_MOUSE
O09117-2	Sypl1	Isoform 2 of Synaptophysin-like protein 1	SYPL1_MOUSE
O09126	Sema4d	Semaphorin-4D	SEM4D_MOUSE
O09131	Gsto1	Glutathione S-transferase omega-1	GSTO1_MOUSE
O09159	Man2b1	Lysosomal alpha-mannosidase	MA2B1_MOUSE
O09167	Rpl21	60S ribosomal protein L21	RL21_MOUSE
O35074	Ptgis	Prostacyclin synthase	PTGIS_MOUSE
O35083	Agpat1	1-acyl-sn-glycerol-3-phosphate acyltransferase alpha	PLCA_MOUSE
O35089	Cnih2	Protein cornichon homolog 2	CNIH2_MOUSE
O35098;O35098-2	Dpysl4	Dihydropyrimidinase-related protein 4;Isoform 2 of Dihydropyrimidinase-related protein 4	DPYL4_MOUSE
O35114	Scarb2	Lysosome membrane protein 2	SCRB2_MOUSE
O35127	Grcc10	Protein C10	C10_MOUSE
O35129	Phb2	Prohibitin-2	PHB2_MOUSE
O35136	Ncam2	Neural cell adhesion molecule 2	NCAM2_MOUSE
O35143	ATP5IF1	ATPase inhibitor, mitochondrial	ATIF1_MOUSE
O35215	Ddt	D-dopachrome decarboxylase	DOPD_MOUSE
O35226;O35226-2	Psmd4	26S proteasome non-ATPase regulatory subunit 4;Isoform Rpn10B of 26S proteasome non-ATPase regulatory subunit 4	PSMD4_MOUSE
O35239	Ptpn9	Tyrosine-protein phosphatase non-receptor type 9	PTN9_MOUSE
O35250;O35250-2	Exoc7	Exocyst complex component 7;Isoform 2 of Exocyst complex component 7	EXOC7_MOUSE
O35295	Purb	Transcriptional activator protein Pur-beta	PURB_MOUSE
O35316	Slc6a6	Sodium- and chloride-dependent taurine transporter	SC6A6_MOUSE
O35343	Kpna4	Importin subunit alpha-3	IMA3_MOUSE
O35344	Kpna3	Importin subunit alpha-4	IMA4_MOUSE
O35345	Kpna6	Importin subunit alpha-7	IMA7_MOUSE
O35350	Capn1	Calpain-1 catalytic subunit	CAN1_MOUSE
O35381	Anp32a	Acidic leucine-rich nuclear phosphoprotein 32 family member A	AN32A_MOUSE
O35382	Exoc4	Exocyst complex component 4	EXOC4_MOUSE
O35405	Pld3	5'-3' exonuclease PLD3	PLD3_MOUSE
O35449	Prrt1	Proline-rich transmembrane protein 1	PRRT1_MOUSE
O35453;O35453-2;P00755;P15949;Q9QYN3;Q9QYN3-2	Hpn;Hpn;Klk1b1;Klk1b9;Klk11;Klk11	Serine protease hepsin;Isoform 2 of Serine protease hepsin;Kallikrein 1-related peptidase b1;Kallikrein 1-related peptidase b9;Kallikrein-11;Isoform 1 of Kallikrein-11	HEPS_MOUSE;HEPS_MOUSE;K1KB1_MOUSE;K1KB9_MOUSE;KLK11_MOUSE;KLK11_MOUSE
O35454	Clcn6	Chloride transport protein 6	CLCN6_MOUSE
O35465;O35465-2	Fkbp8	Peptidyl-prolyl cis-trans isomerase FKBP8;Isoform 2 of Peptidyl-prolyl cis-trans isomerase FKBP8	FKBP8_MOUSE
O35495;O35495-2	Cdk14	Cyclin-dependent kinase 14;Isoform 2 of Cyclin-dependent kinase 14	CDK14_MOUSE
O35526	Stx1a	Syntaxin-1A	STX1A_MOUSE
O35551;O35551-3;O35551-5	Rabep1	Rab GTPase-binding effector protein 1;Isoform 3 of Rab GTPase-binding effector protein 1;Isoform 5 of Rab GTPase-binding effector protein 1	RABE1_MOUSE
O35607	Bmpr2	Bone morphogenetic protein receptor type-2	BMPR2_MOUSE
O35609	Scamp3	Secretory carrier-associated membrane protein 3	SCAM3_MOUSE
O35621	Pmm1	Phosphomannomutase 1	PMM1_MOUSE
O35633;O35633-2	Slc32a1	Vesicular inhibitory amino acid transporter;Isoform 2 of Vesicular inhibitory amino acid transporter	VIAAT_MOUSE
O35639	Anxa3	Annexin A3	ANXA3_MOUSE
O35640	Anxa8	Annexin A8	ANXA8_MOUSE
O35643	Ap1b1	AP-1 complex subunit beta-1	AP1B1_MOUSE
O35681	Syt3	Synaptotagmin-3	SYT3_MOUSE
O35682	Myadm	Myeloid-associated differentiation marker	MYADM_MOUSE
O35737	Hnrnph1	Heterogeneous nuclear ribonucleoprotein H	HNRH1_MOUSE
O35857	Timm44	Mitochondrial import inner membrane translocase subunit TIM44	TIM44_MOUSE
O35864	Cops5	COP9 signalosome complex subunit 5	CSN5_MOUSE
O35874	Slc1a4	Neutral amino acid transporter A	SATT_MOUSE
O35887	Calu	Calumenin	CALU_MOUSE
O35927;O35927-2	Ctnnd2	Catenin delta-2;Isoform 2 of Catenin delta-2	CTND2_MOUSE
O35945	Aldh1a7	Aldehyde dehydrogenase, cytosolic 1	AL1A7_MOUSE
O35954	Pitpnm1	Membrane-associated phosphatidylinositol transfer protein 1	PITM1_MOUSE
O35963	Rab33b	Ras-related protein Rab-33B	RB33B_MOUSE
O54734	Ddost	Dolichyl-diphosphooligosaccharide--protein glycosyltransferase 48 kDa subunit	OST48_MOUSE
O54774	Ap3d1	AP-3 complex subunit delta-1	AP3D1_MOUSE
O54781	Srpk2	SRSF protein kinase 2	SRPK2_MOUSE
O54828	Rgs9	Regulator of G-protein signaling 9	RGS9_MOUSE
O54829	Rgs7	Regulator of G-protein signaling 7	RGS7_MOUSE
O54834;O54834-2;O54834-3;O54834-4	Arhgap6	Rho GTPase-activating protein 6;Isoform 2 of Rho GTPase-activating protein 6;Isoform 3 of Rho GTPase-activating protein 6;Isoform 4 of Rho GTPase-activating protein 6	RHG06_MOUSE
O54865	Gucy1b1	Guanylate cyclase soluble subunit beta-1	GCYB1_MOUSE
O54901	Cd200	OX-2 membrane glycoprotein	OX2G_MOUSE
O54916	Reps1	RalBP1-associated Eps domain-containing protein 1	REPS1_MOUSE
O54931;O54931-4	Akap2	A-kinase anchor protein 2;Isoform 4 of A-kinase anchor protein 2	AKAP2_MOUSE
O54962	Banf1	Barrier-to-autointegration factor	BAF_MOUSE
O54983	Crym	Ketimine reductase mu-crystallin	CRYM_MOUSE
O54984	Get3	ATPase GET3	GET3_MOUSE
O54988;O54988-2	Slk	STE20-like serine/threonine-protein kinase;Isoform 2 of STE20-like serine/threonine-protein kinase	SLK_MOUSE
O54991	Cntnap1	Contactin-associated protein 1	CNTP1_MOUSE
O55017;O55017-2	Cacna1b	Voltage-dependent N-type calcium channel subunit alpha-1B;Isoform NB2 of Voltage-dependent N-type calcium channel subunit alpha-1B	CAC1B_MOUSE
O55022	Pgrmc1	Membrane-associated progesterone receptor component 1	PGRC1_MOUSE
O55023	Impa1	Inositol monophosphatase 1	IMPA1_MOUSE
O55026	Entpd2	Ectonucleoside triphosphate diphosphohydrolase 2	ENTP2_MOUSE
O55029	Copb2	Coatomer subunit beta'	COPB2_MOUSE
O55042;O55042-2	Snca	Alpha-synuclein;Isoform 2 of Alpha-synuclein	SYUA_MOUSE
O55074;Q7TN79	Akap7	A-kinase anchor protein 7 isoform alpha;A-kinase anchor protein 7 isoform gamma	AKA7A_MOUSE;AKA7G_MOUSE
O55091	Impact	Protein IMPACT	IMPCT_MOUSE
O55100;O55100-2	Syngr1	Synaptogyrin-1;Isoform 1B of Synaptogyrin-1	SNG1_MOUSE
O55106	Strn	Striatin	STRN_MOUSE
O55125	Nipsnap1	Protein NipSnap homolog 1	NIPS1_MOUSE
O55126	Nipsnap2	Protein NipSnap homolog 2	NIPS2_MOUSE
O55131	Septin7	Septin-7	SEPT7_MOUSE
O55135	Eif6	Eukaryotic translation initiation factor 6	IF6_MOUSE
O55143	Atp2a2	Sarcoplasmic/endoplasmic reticulum calcium ATPase 2	AT2A2_MOUSE
O55229	Chkb	Choline/ethanolamine kinase	CHKB_MOUSE
O55234	Psmb5	Proteasome subunit beta type-5	PSB5_MOUSE
O55242;O55242-2	Sigmar1	Sigma non-opioid intracellular receptor 1;Isoform 2 of Sigma non-opioid intracellular receptor 1	SGMR1_MOUSE
O70152	Dpm1	Dolichol-phosphate mannosyltransferase subunit 1	DPM1_MOUSE
O70161	Pip5k1c	Phosphatidylinositol 4-phosphate 5-kinase type-1 gamma	PI51C_MOUSE
O70166	Stmn3	Stathmin-3	STMN3_MOUSE
O70174	Chrna4	Neuronal acetylcholine receptor subunit alpha-4	ACHA4_MOUSE
O70228	Atp9a	Probable phospholipid-transporting ATPase IIA	ATP9A_MOUSE
O70251	Eef1b	Elongation factor 1-beta	EF1B_MOUSE
O70252	Hmox2	Heme oxygenase 2	HMOX2_MOUSE
O70305;O70305-2;O70305-3	Atxn2	Ataxin-2;Isoform 2 of Ataxin-2;Isoform 3 of Ataxin-2	ATX2_MOUSE
O70309	Itgb5	Integrin beta-5	ITB5_MOUSE
O70318	Epb41l2	Band 4.1-like protein 2	E41L2_MOUSE
O70325;O70325-2;O70325-3	Gpx4	Phospholipid hydroperoxide glutathione peroxidase;Isoform Cytoplasmic of Phospholipid hydroperoxide glutathione peroxidase;Isoform Nuclear of Phospholipid hydroperoxide glutathione peroxidase	GPX4_MOUSE
O70370	Ctss	Cathepsin S	CATS_MOUSE
O70435	Psma3	Proteasome subunit alpha type-3	PSA3_MOUSE
O70439	Stx7	Syntaxin-7	STX7_MOUSE
O70443	Gnaz	Guanine nucleotide-binding protein G(z) subunit alpha	GNAZ_MOUSE
O70456	Sfn	14-3-3 protein sigma	1433S_MOUSE
O70492	Snx3	Sorting nexin-3	SNX3_MOUSE
O70493	Snx12	Sorting nexin-12	SNX12_MOUSE
O70503	Hsd17b12	Very-long-chain 3-oxoacyl-CoA reductase	DHB12_MOUSE
O70507	Hcn4	Potassium/sodium hyperpolarization-activated cyclic nucleotide-gated channel 4	HCN4_MOUSE
O70579	Slc25a17	Peroxisomal membrane protein PMP34	PM34_MOUSE
O70582	Alox12b	Arachidonate 12-lipoxygenase, 12R-type	LX12B_MOUSE
O70589	Cask	Peripheral plasma membrane protein CASK	CSKP_MOUSE
O70622;O70622-2	Rtn2	Reticulon-2;Isoform 2 of Reticulon-2	RTN2_MOUSE
O88312	Agr2	Anterior gradient protein 2 homolog	AGR2_MOUSE
O88319	Ntsr1	Neurotensin receptor type 1	NTR1_MOUSE
O88342	Wdr1	WD repeat-containing protein 1	WDR1_MOUSE
O88343	Slc4a4	Electrogenic sodium bicarbonate cotransporter 1	S4A4_MOUSE
O88384	Vti1b	Vesicle transport through interaction with t-SNAREs homolog 1B	VTI1B_MOUSE
O88441	Mtx2	Metaxin-2	MTX2_MOUSE
O88444	Adcy1	Adenylate cyclase type 1	ADCY1_MOUSE
O88447	Klc1	Kinesin light chain 1	KLC1_MOUSE
O88448	Klc2	Kinesin light chain 2	KLC2_MOUSE
O88456	Capns1	Calpain small subunit 1	CPNS1_MOUSE
O88485	Dync1i1	Cytoplasmic dynein 1 intermediate chain 1	DC1I1_MOUSE
O88487	Dync1i2	Cytoplasmic dynein 1 intermediate chain 2	DC1I2_MOUSE
O88492;O88492-2	Plin4	Perilipin-4;Isoform 2 of Perilipin-4	PLIN4_MOUSE
O88507	Cntfr	Ciliary neurotrophic factor receptor subunit alpha	CNTFR_MOUSE
O88532	Zfr	Zinc finger RNA-binding protein	ZFR_MOUSE
O88533	Ddc	Aromatic-L-amino-acid decarboxylase	DDC_MOUSE
O88543	Cops3	COP9 signalosome complex subunit 3	CSN3_MOUSE
O88544	Cops4	COP9 signalosome complex subunit 4	CSN4_MOUSE
O88545	Cops6	COP9 signalosome complex subunit 6	CSN6_MOUSE
O88569;O88569-2;O88569-3	Hnrnpa2b1	Heterogeneous nuclear ribonucleoproteins A2/B1;Isoform 2 of Heterogeneous nuclear ribonucleoproteins A2/B1;Isoform 3 of Heterogeneous nuclear ribonucleoproteins A2/B1	ROA2_MOUSE
O88587;O88587-2	Comt	Catechol O-methyltransferase;Isoform Soluble of Catechol O-methyltransferase	COMT_MOUSE
O88643	Pak1	Serine/threonine-protein kinase PAK 1	PAK1_MOUSE
O88653	Lamtor3	Ragulator complex protein LAMTOR3	LTOR3_MOUSE
O88685	Psmc3	26S proteasome regulatory subunit 6A	PRS6A_MOUSE
O88689;Q91Y11;Q91Y13;Q91Y20	Pcdha4;Pcdha9;Pcdha7;Pcdha10	Protocadherin alpha-4;Protocadherin alpha-9;Protocadherin alpha-7;Protocadherin alpha-10	PCDA4_MOUSE;PCDA9_MOUSE;PCDA7_MOUSE;PCDAA_MOUSE
O88712	Ctbp1	C-terminal-binding protein 1	CTBP1_MOUSE
O88737	Bsn	Protein bassoon	BSN_MOUSE
O88741	Gdap1	Ganglioside-induced differentiation-associated protein 1	GDAP1_MOUSE
O88746	Tom1	Target of Myb protein 1	TOM1_MOUSE
O88811	Stam2	Signal transducing adapter molecule 2	STAM2_MOUSE
O88834;O88834-2	Shd	SH2 domain-containing adapter protein D;Isoform 2 of SH2 domain-containing adapter protein D	SHD_MOUSE
O88844	Idh1	Isocitrate dehydrogenase [NADP] cytoplasmic	IDHC_MOUSE
O88845	Akap10	A-kinase anchor protein 10, mitochondrial	AKA10_MOUSE
O88848;O88848-2	Arl6	ADP-ribosylation factor-like protein 6;Isoform 2 of ADP-ribosylation factor-like protein 6	ARL6_MOUSE
O88935	Syn1	Synapsin-1	SYN1_MOUSE
O88935-1	Syn1	Isoform Ib of Synapsin-1	SYN1_MOUSE
O88951	Lin7b	Protein lin-7 homolog B	LIN7B_MOUSE
O88958	Gnpda1	Glucosamine-6-phosphate isomerase 1	GNPI1_MOUSE
O88983	Stx8	Syntaxin-8	STX8_MOUSE
O88998;O88998-3	Olfm1	Noelin;Isoform 3 of Noelin	NOE1_MOUSE
O89026	Robo1	Roundabout homolog 1	ROBO1_MOUSE
O89051	Itm2b	Integral membrane protein 2B	ITM2B_MOUSE
O89053	Coro1a	Coronin-1A	COR1A_MOUSE
O89086	Rbm3	RNA-binding protein 3	RBM3_MOUSE
O89094;O89094-2	Casp14	Caspase-14;Isoform 2 of Caspase-14	CASPE_MOUSE
O89112	Lancl1	Glutathione S-transferase LANCL1	LANC1_MOUSE
P00158	Mt-Cyb	Cytochrome b	CYB_MOUSE
P00397	Mtco1	Cytochrome c oxidase subunit 1	COX1_MOUSE
P00405	Mtco2	Cytochrome c oxidase subunit 2	COX2_MOUSE
P00416	mt-Co3	Cytochrome c oxidase subunit 3	COX3_MOUSE
P00493	Hprt1	Hypoxanthine-guanine phosphoribosyltransferase	HPRT_MOUSE
P00848	Mtatp6	ATP synthase subunit a	ATP6_MOUSE
P00920	Ca2	Carbonic anhydrase 2	CAH2_MOUSE
P01027	C3	Complement C3	CO3_MOUSE
P01786;P01787;P01788;P01789;P01790;P01791;P01792;P01793;P01794	Unknown	Ig heavy chain V region MOPC 47A;Ig heavy chain V regions TEPC 15/S107/HPCM1/HPCM2/HPCM3;Ig heavy chain V region H8;Ig heavy chain V region M603;Ig heavy chain V region M511;Ig heavy chain V region HPCM6;Ig heavy chain V region HPCG8;Ig heavy chain V region HPCG13;Ig heavy chain V region HPCG14	HVM17_MOUSE;HVM18_MOUSE;HVM19_MOUSE;HVM20_MOUSE;HVM21_MOUSE;HVM22_MOUSE;HVM23_MOUSE;HVM24_MOUSE;HVM25_MOUSE
P01831	Thy1	Thy-1 membrane glycoprotein	THY1_MOUSE
P01867;P01867-2	Igh-3	Ig gamma-2B chain C region;Isoform 2 of Ig gamma-2B chain C region	IGG2B_MOUSE
P01887	B2m	Beta-2-microglobulin	B2MG_MOUSE
P01899	H2-D1	H-2 class I histocompatibility antigen, D-B alpha chain	HA11_MOUSE
P01901	H2-K1	H-2 class I histocompatibility antigen, K-B alpha chain	HA1B_MOUSE
P01942	Hba	Hemoglobin subunit alpha	HBA_MOUSE
P02088	Hbb-b1	Hemoglobin subunit beta-1	HBB1_MOUSE
P02798	Mt2	Metallothionein-2	MT2_MOUSE
P02802	Mt1	Metallothionein-1	MT1_MOUSE
P03888	Mtnd1	NADH-ubiquinone oxidoreductase chain 1	NU1M_MOUSE
P03893	Mtnd2	NADH-ubiquinone oxidoreductase chain 2	NU2M_MOUSE
P03899	Mtnd3	NADH-ubiquinone oxidoreductase chain 3	NU3M_MOUSE
P03903	Mtnd4l	NADH-ubiquinone oxidoreductase chain 4L	NU4LM_MOUSE
P03911	Mtnd4	NADH-ubiquinone oxidoreductase chain 4	NU4M_MOUSE
P03921	Mtnd5	NADH-ubiquinone oxidoreductase chain 5	NU5M_MOUSE
P03930	Mtatp8	ATP synthase protein 8	ATP8_MOUSE
P03995;P03995-2	Gfap	Glial fibrillary acidic protein;Isoform 2 of Glial fibrillary acidic protein	GFAP_MOUSE
P04247	Mb	Myoglobin	MYG_MOUSE
P04370-4	Mbp	Isoform 4 of Myelin basic protein	MBP_MOUSE
P04443;P04444	Hbb-bh0;Hbb-bh1	Hemoglobin subunit beta-H0;Hemoglobin subunit beta-H1	HBB0_MOUSE;HBBZ_MOUSE
P04627	Araf	Serine/threonine-protein kinase A-Raf	ARAF_MOUSE
P04925	Prnp	Major prion protein	PRIO_MOUSE
P05063	Aldoc	Fructose-bisphosphate aldolase C	ALDOC_MOUSE
P05064	Aldoa	Fructose-bisphosphate aldolase A	ALDOA_MOUSE
P05132;P05132-2	Prkaca	cAMP-dependent protein kinase catalytic subunit alpha;Isoform 2 of cAMP-dependent protein kinase catalytic subunit alpha	KAPCA_MOUSE
P05201	Got1	Aspartate aminotransferase, cytoplasmic	AATC_MOUSE
P05202	Got2	Aspartate aminotransferase, mitochondrial	AATM_MOUSE
P05213	Tuba1b	Tubulin alpha-1B chain	TBA1B_MOUSE
P05214	Tuba3a	Tubulin alpha-3 chain	TBA3_MOUSE
P05555	Itgam	Integrin alpha-M	ITAM_MOUSE
P06151	Ldha	L-lactate dehydrogenase A chain	LDHA_MOUSE
P06745	Gpi	Glucose-6-phosphate isomerase	G6PI_MOUSE
P06795;P21447	Abcb1b;Abcb1a	ATP-dependent translocase ABCB1	MDR1B_MOUSE;MDR1A_MOUSE
P06801	Me1	NADP-dependent malic enzyme	MAOX_MOUSE
P06837	Gap43	Neuromodulin	NEUM_MOUSE
P06909	Cfh	Complement factor H	CFAH_MOUSE
P07091	S100a4	Protein S100-A4	S10A4_MOUSE
P07146	Prss2	Anionic trypsin-2	TRY2_MOUSE
P07214	Sparc	SPARC	SPRC_MOUSE
P07356	Anxa2	Annexin A2	ANXA2_MOUSE
P07724	Alb	Serum albumin	ALBU_MOUSE
P07758;P22599;Q00896;Q00898	Serpina1a;Serpina1b;Serpina1c;Serpina1e	Alpha-1-antitrypsin 1-1;Alpha-1-antitrypsin 1-2;Alpha-1-antitrypsin 1-3;Alpha-1-antitrypsin 1-5	A1AT1_MOUSE;A1AT2_MOUSE;A1AT3_MOUSE;A1AT5_MOUSE
P07901	Hsp90aa1	Heat shock protein HSP 90-alpha	HS90A_MOUSE
P08003	Pdia4	Protein disulfide-isomerase A4	PDIA4_MOUSE
P08071	Ltf	Lactotransferrin	TRFL_MOUSE
P08074	Cbr2	Carbonyl reductase [NADPH] 2	CBR2_MOUSE
P08113	Hsp90b1	Endoplasmin	ENPL_MOUSE
P08121	Col3a1	Collagen alpha-1(III) chain	CO3A1_MOUSE
P08122	Col4a2	Collagen alpha-2(IV) chain	CO4A2_MOUSE
P08207	S100a10	Protein S100-A10	S10AA_MOUSE
P08226	Apoe	Apolipoprotein E	APOE_MOUSE
P08228	Sod1	Superoxide dismutase [Cu-Zn]	SODC_MOUSE
P08249	Mdh2	Malate dehydrogenase, mitochondrial	MDHM_MOUSE
P08414	Camk4	Calcium/calmodulin-dependent protein kinase type IV	KCC4_MOUSE
P08551	Nefl	Neurofilament light polypeptide	NFL_MOUSE
P08553	Nefm	Neurofilament medium polypeptide	NFM_MOUSE
P08752	Gnai2	Guanine nucleotide-binding protein G(i) subunit alpha-2	GNAI2_MOUSE
P09055;P09055-2	Itgb1	Integrin beta-1;Isoform 2 of Integrin beta-1	ITB1_MOUSE
P09103	P4hb	Protein disulfide-isomerase	PDIA1_MOUSE
P09405	Ncl	Nucleolin	NUCL_MOUSE
P09411	Pgk1	Phosphoglycerate kinase 1	PGK1_MOUSE
P09528	Fth1	Ferritin heavy chain	FRIH_MOUSE
P09541	Myl4	Myosin light chain 4	MYL4_MOUSE
P09542	Myl3	Myosin light chain 3	MYL3_MOUSE
P09581	Csf1r	Macrophage colony-stimulating factor 1 receptor	CSF1R_MOUSE
P09671	Sod2	Superoxide dismutase [Mn], mitochondrial	SODM_MOUSE
P09813	Apoa2	Apolipoprotein A-II	APOA2_MOUSE
P0C0S6;Q3THW5	H2az1;H2az2	Histone H2A.Z;Histone H2A.V	H2AZ_MOUSE;H2AV_MOUSE
P0C7L0;P0C7L0-2	Wipf3	WAS/WASL-interacting protein family member 3;Isoform 2 of WAS/WASL-interacting protein family member 3	WIPF3_MOUSE
P0CG49;P0CG50;P62983;P62984	Ubb;Ubc;Rps27a;Uba52	Polyubiquitin-B;Polyubiquitin-C;Ubiquitin-40S ribosomal protein S27a;Ubiquitin-60S ribosomal protein L40	UBB_MOUSE;UBC_MOUSE;RS27A_MOUSE;RL40_MOUSE
P0DN34	Ndufb1	NADH dehydrogenase [ubiquinone] 1 beta subcomplex subunit 1	NDUB1_MOUSE
P0DN89;P0DN90;P0DN91	Tmem254a;Tmem254b;Tmem254c	Transmembrane protein 254;Transmembrane protein 254b;Transmembrane protein 254c	T254A_MOUSE;T254B_MOUSE;T254C_MOUSE
P0DP26;P0DP27;P0DP28	Calm1;Calm2;Calm3	Calmodulin-1;Calmodulin-2;Calmodulin-3	CALM1_MOUSE;CALM2_MOUSE;CALM3_MOUSE
P10107	Anxa1	Annexin A1	ANXA1_MOUSE
P10126	Eef1a1	Elongation factor 1-alpha 1	EF1A1_MOUSE
P10518	Alad	Delta-aminolevulinic acid dehydratase	HEM2_MOUSE
P10605	Ctsb	Cathepsin B	CATB_MOUSE
P10630;P10630-2	Eif4a2	Eukaryotic initiation factor 4A-II;Isoform 2 of Eukaryotic initiation factor 4A-II	IF4A2_MOUSE
P10637	Mapt	Microtubule-associated protein tau	TAU_MOUSE
P10637-2	Mapt	Isoform Tau-A of Microtubule-associated protein tau	TAU_MOUSE
P10637-3;P10637-4	Mapt	Isoform Tau-B of Microtubule-associated protein tau;Isoform Tau-C of Microtubule-associated protein tau	TAU_MOUSE
P10639	Txn	Thioredoxin	THIO_MOUSE
P10649	Gstm1	Glutathione S-transferase Mu 1	GSTM1_MOUSE
P10751	Zfp11	Zinc finger protein 11	ZFP11_MOUSE
P10852;P10852-2	Slc3a2	4F2 cell-surface antigen heavy chain;Isoform 2 of 4F2 cell-surface antigen heavy chain	4F2_MOUSE
P10853;P10854;Q64475;Q64478;Q64525;Q6ZWY9;Q8CGP1;Q8CGP2;Q8CGP2-2	H2bc7;H2bc14;H2bc3;H2bc9;Hist2h2bb;H2bc4;H2bc12;Hist1h2bp;Hist1h2bp	Histone H2B type 1-F/J/L;Histone H2B type 1-M;Histone H2B type 1-B;Histone H2B type 1-H;Histone H2B type 2-B;Histone H2B type 1-C/E/G;Histone H2B type 1-K;Histone H2B type 1-P;Isoform 2 of Histone H2B type 1-P	H2B1F_MOUSE;H2B1M_MOUSE;H2B1B_MOUSE;H2B1H_MOUSE;H2B2B_MOUSE;H2B1C_MOUSE;H2B1K_MOUSE;H2B1P_MOUSE;H2B1P_MOUSE
P10922	H1-0	Histone H1.0	H10_MOUSE
P11087;P11087-2	Col1a1	Collagen alpha-1(I) chain;Isoform 2 of Collagen alpha-1(I) chain	CO1A1_MOUSE
P11247	Mpo	Myeloperoxidase	PERM_MOUSE
P11404	Fabp3	Fatty acid-binding protein, heart	FABPH_MOUSE
P11438	Lamp1	Lysosome-associated membrane glycoprotein 1	LAMP1_MOUSE
P11499	Hsp90ab1	Heat shock protein HSP 90-beta	HS90B_MOUSE
P11627	L1cam	Neural cell adhesion molecule L1	L1CAM_MOUSE
P11798	Camk2a	Calcium/calmodulin-dependent protein kinase type II subunit alpha	KCC2A_MOUSE
P11835	Itgb2	Integrin beta-2	ITB2_MOUSE
P11881;P11881-2;P11881-3;P11881-4;P11881-5;P11881-6;P11881-7;P11881-8	Itpr1	Inositol 1,4,5-trisphosphate receptor type 1;Isoform 2 of Inositol 1,4,5-trisphosphate receptor type 1;Isoform 3 of Inositol 1,4,5-trisphosphate receptor type 1;Isoform 4 of Inositol 1,4,5-trisphosphate receptor type 1;Isoform 5 of Inositol 1,4,5-trisphosphate receptor type 1;Isoform 6 of Inositol 1,4,5-trisphosphate receptor type 1;Isoform 7 of Inositol 1,4,5-trisphosphate receptor type 1;Isofor…	ITPR1_MOUSE
P11983	Tcp1	T-complex protein 1 subunit alpha	TCPA_MOUSE
P12023-2	App	Isoform APP695 of Amyloid-beta A4 protein	A4_MOUSE
P12265	Gusb	Beta-glucuronidase	BGLR_MOUSE
P12367	Prkar2a	cAMP-dependent protein kinase type II-alpha regulatory subunit	KAP2_MOUSE
P12382	Pfkl	ATP-dependent 6-phosphofructokinase, liver type	PFKAL_MOUSE
P12388	Serpinb2	Plasminogen activator inhibitor 2, macrophage	PAI2_MOUSE
P12657	Chrm1	Muscarinic acetylcholine receptor M1	ACM1_MOUSE
P12658	Calb1	Calbindin	CALB1_MOUSE
P12787	Cox5a	Cytochrome c oxidase subunit 5A, mitochondrial	COX5A_MOUSE
P12815	Pdcd6	Programmed cell death protein 6	PDCD6_MOUSE
P12849	Prkar1b	cAMP-dependent protein kinase type I-beta regulatory subunit	KAP1_MOUSE
P12960	Cntn1	Contactin-1	CNTN1_MOUSE
P12970	Rpl7a	60S ribosomal protein L7a	RL7A_MOUSE
P13020;P13020-2	Gsn	Gelsolin;Isoform 2 of Gelsolin	GELS_MOUSE
P13595	Ncam1	Neural cell adhesion molecule 1	NCAM1_MOUSE
P13707	Gpd1	Glycerol-3-phosphate dehydrogenase [NAD(+)], cytoplasmic	GPDA_MOUSE
P14069	S100a6	Protein S100-A6	S10A6_MOUSE
P14094	Atp1b1	Sodium/potassium-transporting ATPase subunit beta-1	AT1B1_MOUSE
P14106	C1qb	Complement C1q subcomponent subunit B	C1QB_MOUSE
P14115	Rpl27a	60S ribosomal protein L27a	RL27A_MOUSE
P14131	Rps16	40S ribosomal protein S16	RS16_MOUSE
P14148	Rpl7	60S ribosomal protein L7	RL7_MOUSE
P14152	Mdh1	Malate dehydrogenase, cytoplasmic	MDHC_MOUSE
P14206	Rpsa	40S ribosomal protein SA	RSSA_MOUSE
P14211	Calr	Calreticulin	CALR_MOUSE
P14231	Atp1b2	Sodium/potassium-transporting ATPase subunit beta-2	AT1B2_MOUSE
P14602;P14602-2;P14602-3	Hspb1	Heat shock protein beta-1;Isoform B of Heat shock protein beta-1;Isoform C of Heat shock protein beta-1	HSPB1_MOUSE
P14685	Psmd3	26S proteasome non-ATPase regulatory subunit 3	PSMD3_MOUSE
P14824	Anxa6	Annexin A6	ANXA6_MOUSE
P14869	Rplp0	60S acidic ribosomal protein P0	RLA0_MOUSE
P14873	Map1b	Microtubule-associated protein 1B	MAP1B_MOUSE
P15105	Glul	Glutamine synthetase	GLNA_MOUSE
P15116	Cdh2	Cadherin-2	CADH2_MOUSE
P15209;P15209-3;P15209-4	Ntrk2	BDNF/NT-3 growth factors receptor;Isoform L1 of BDNF/NT-3 growth factors receptor;Isoform L10 of BDNF/NT-3 growth factors receptor	NTRK2_MOUSE
P15508	Sptb	Spectrin beta chain, erythrocytic	SPTB1_MOUSE
P15532	Nme1	Nucleoside diphosphate kinase A	NDKA_MOUSE
P15864	H1-2	Histone H1.2	H12_MOUSE
P16045	Lgals1	Galectin-1	LEG1_MOUSE
P16054	Prkce	Protein kinase C epsilon type	KPCE_MOUSE
P16110	Lgals3	Galectin-3	LEG3_MOUSE
P16125	Ldhb	L-lactate dehydrogenase B chain	LDHB_MOUSE
P16283	Slc4a3	Anion exchange protein 3	B3A3_MOUSE
P16330	Cnp	2',3'-cyclic-nucleotide 3'-phosphodiesterase	CN37_MOUSE
P16388	Kcna1	Potassium voltage-gated channel subfamily A member 1	KCNA1_MOUSE
P16460	Ass1	Argininosuccinate synthase	ASSY_MOUSE
P16546	Sptan1	Spectrin alpha chain, non-erythrocytic 1	SPTN1_MOUSE
P16675	Ctsa	Lysosomal protective protein	PPGB_MOUSE
P16858	Gapdh	Glyceraldehyde-3-phosphate dehydrogenase	G3P_MOUSE
P17095	Hmga1	High mobility group protein HMG-I/HMG-Y	HMGA1_MOUSE
P17156	Hspa2	Heat shock-related 70 kDa protein 2	HSP72_MOUSE
P17182	Eno1	Alpha-enolase	ENOA_MOUSE
P17183	Eno2	Gamma-enolase	ENOG_MOUSE
P17426;P17426-2	Ap2a1	AP-2 complex subunit alpha-1;Isoform B of AP-2 complex subunit alpha-1	AP2A1_MOUSE
P17427	Ap2a2	AP-2 complex subunit alpha-2	AP2A2_MOUSE
P17665	Cox7c	Cytochrome c oxidase subunit 7C, mitochondrial	COX7C_MOUSE
P17710-3	Hk1	Isoform HK1 of Hexokinase-1	HXK1_MOUSE
P17742	Ppia	Peptidyl-prolyl cis-trans isomerase A	PPIA_MOUSE
P17751	Tpi1	Triosephosphate isomerase	TPIS_MOUSE
P17809	Slc2a1	Solute carrier family 2, facilitated glucose transporter member 1	GTR1_MOUSE
P17879;Q61696	Hspa1b;Hspa1a	Heat shock 70 kDa protein 1B;Heat shock 70 kDa protein 1A	HS71B_MOUSE;HS71A_MOUSE
P17897	Lyz1	Lysozyme C-1	LYZ1_MOUSE
P18052;P18052-2	Ptpra	Receptor-type tyrosine-protein phosphatase alpha;Isoform 2 of Receptor-type tyrosine-protein phosphatase alpha	PTPRA_MOUSE
P18242	Ctsd	Cathepsin D	CATD_MOUSE
P18608	Hmgn1	Non-histone chromosomal protein HMG-14	HMGN1_MOUSE
P18653;P18654;Q9WUT3	Rps6ka1;Rps6ka3;Rps6ka2	Ribosomal protein S6 kinase alpha-1;Ribosomal protein S6 kinase alpha-3;Ribosomal protein S6 kinase alpha-2	KS6A1_MOUSE;KS6A3_MOUSE;KS6A2_MOUSE
P18760	Cfl1	Cofilin-1	COF1_MOUSE
P18872	Gnao1	Guanine nucleotide-binding protein G(o) subunit alpha	GNAO_MOUSE
P19096	Fasn	Fatty acid synthase	FAS_MOUSE
P19123	Tnnc1	Troponin C, slow skeletal and cardiac muscles	TNNC1_MOUSE
P19157	Gstp1	Glutathione S-transferase P 1	GSTP1_MOUSE
P19246	Nefh	Neurofilament heavy polypeptide	NFH_MOUSE
P19253	Rpl13a	60S ribosomal protein L13a	RL13A_MOUSE
P19258	Mpv17	Protein Mpv17	MPV17_MOUSE
P19324	Serpinh1	Serpin H1	SERPH_MOUSE
P19536	Cox5b	Cytochrome c oxidase subunit 5B, mitochondrial	COX5B_MOUSE
P19783	Cox4i1	Cytochrome c oxidase subunit 4 isoform 1, mitochondrial	COX41_MOUSE
P19973	Lsp1	Lymphocyte-specific protein 1	LSP1_MOUSE
P20029	Hspa5	Endoplasmic reticulum chaperone BiP	BIP_MOUSE
P20060	Hexb	Beta-hexosaminidase subunit beta	HEXB_MOUSE
P20065-2	Tmsb4x	Isoform Short of Thymosin beta-4	TYB4_MOUSE
P20108	Prdx3	Thioredoxin-dependent peroxide reductase, mitochondrial	PRDX3_MOUSE
P20152	Vim	Vimentin	VIME_MOUSE
P20357	Map2	Microtubule-associated protein 2	MTAP2_MOUSE
P20444	Prkca	Protein kinase C alpha type	KPCA_MOUSE
P20917	Mag	Myelin-associated glycoprotein	MAG_MOUSE
P21107	Tpm3	Tropomyosin alpha-3 chain	TPM3_MOUSE
P21107-2	Tpm3	Isoform 2 of Tropomyosin alpha-3 chain	TPM3_MOUSE
P21278	Gna11	Guanine nucleotide-binding protein subunit alpha-11	GNA11_MOUSE
P21279	Gnaq	Guanine nucleotide-binding protein G(q) subunit alpha	GNAQ_MOUSE
P21460	Cst3	Cystatin-C	CYTC_MOUSE
P21550	Eno3	Beta-enolase	ENOB_MOUSE
P21836	Ache	Acetylcholinesterase	ACES_MOUSE
P21956;P21956-2	Mfge8	Lactadherin;Isoform 2 of Lactadherin	MFGM_MOUSE
P21995	Emb	Embigin	EMB_MOUSE
P22315	Fech	Ferrochelatase, mitochondrial	HEMH_MOUSE
P22437	Ptgs1	Prostaglandin G/H synthase 1	PGH1_MOUSE
P22682	Cbl	E3 ubiquitin-protein ligase CBL	CBL_MOUSE
P22723;P22723-2	Gabrg2	Gamma-aminobutyric acid receptor subunit gamma-2;Isoform 2S of Gamma-aminobutyric acid receptor subunit gamma-2	GBRG2_MOUSE
P22892	Ap1g1	AP-1 complex subunit gamma-1	AP1G1_MOUSE
P23242	Gja1	Gap junction alpha-1 protein	CXA1_MOUSE
P23492	Pnp	Purine nucleoside phosphorylase	PNPH_MOUSE
P23506;P23506-2	Pcmt1	Protein-L-isoaspartate(D-aspartate) O-methyltransferase;Isoform 2 of Protein-L-isoaspartate(D-aspartate) O-methyltransferase	PIMT_MOUSE
P23780;Q8VC60	Glb1;Glb1l	Beta-galactosidase;Beta-galactosidase-1-like protein	BGAL_MOUSE;GLB1L_MOUSE
P23818	Gria1	Glutamate receptor 1	GRIA1_MOUSE
P23819;P23819-4	Gria2	Glutamate receptor 2;Isoform 4 of Glutamate receptor 2	GRIA2_MOUSE
P23927	Cryab	Alpha-crystallin B chain	CRYAB_MOUSE
P24270	Cat	Catalase	CATA_MOUSE
P24288	Bcat1	Branched-chain-amino-acid aminotransferase, cytosolic	BCAT1_MOUSE
P24369	Ppib	Peptidyl-prolyl cis-trans isomerase B	PPIB_MOUSE
P24452	Capg	Macrophage-capping protein	CAPG_MOUSE
P24472	Gsta4	Glutathione S-transferase A4	GSTA4_MOUSE
P24527	Lta4h	Leukotriene A-4 hydrolase	LKHA4_MOUSE
P24529	Th	Tyrosine 3-monooxygenase	TY3H_MOUSE
P24547	Impdh2	Inosine-5'-monophosphate dehydrogenase 2	IMDH2_MOUSE
P24549	Aldh1a1	Retinal dehydrogenase 1	AL1A1_MOUSE
P24668	M6pr	Cation-dependent mannose-6-phosphate receptor	MPRD_MOUSE
P25444	Rps2	40S ribosomal protein S2	RS2_MOUSE
P26039	Tln1	Talin-1	TLN1_MOUSE
P26040	Ezr	Ezrin	EZRI_MOUSE
P26041	Msn	Moesin	MOES_MOUSE
P26049	Gabra3	Gamma-aminobutyric acid receptor subunit alpha-3	GBRA3_MOUSE
P26350	Ptma	Prothymosin alpha	PTMA_MOUSE
P26443	Glud1	Glutamate dehydrogenase 1, mitochondrial	DHE3_MOUSE
P26638	Sars1	Serine--tRNA ligase, cytoplasmic	SYSC_MOUSE
P26645	Marcks	Myristoylated alanine-rich C-kinase substrate	MARCS_MOUSE
P26883	Fkbp1a	Peptidyl-prolyl cis-trans isomerase FKBP1A	FKB1A_MOUSE
P27048;P63163	Snrpb;Snrpn	Small nuclear ribonucleoprotein-associated protein B;Small nuclear ribonucleoprotein-associated protein N	RSMB_MOUSE;RSMN_MOUSE
P27545	Cers1	Ceramide synthase 1	CERS1_MOUSE
P27546;P27546-2	Map4	Microtubule-associated protein 4;Isoform 2 of Microtubule-associated protein 4	MAP4_MOUSE
P27546-4	Map4	Isoform 4 of Microtubule-associated protein 4	MAP4_MOUSE
P27601	Gna13	Guanine nucleotide-binding protein subunit alpha-13	GNA13_MOUSE
P27612	Plaa	Phospholipase A-2-activating protein	PLAP_MOUSE
P27659	Rpl3	60S ribosomal protein L3	RL3_MOUSE
P27773	Pdia3	Protein disulfide-isomerase A3	PDIA3_MOUSE
P28028	Braf	Serine/threonine-protein kinase B-raf	BRAF_MOUSE
P28184	Mt3	Metallothionein-3	MT3_MOUSE
P28474	Adh5	Alcohol dehydrogenase class-3	ADHX_MOUSE
P28481;P28481-1;P28481-2;P28481-4;P28481-5;P28481-6;P28481-7	Col2a1	Collagen alpha-1(II) chain;Isoform 2 of Collagen alpha-1(II) chain;Isoform 3 of Collagen alpha-1(II) chain;Isoform 4 of Collagen alpha-1(II) chain;Isoform 5 of Collagen alpha-1(II) chain;Isoform 6 of Collagen alpha-1(II) chain;Isoform 7 of Collagen alpha-1(II) chain	CO2A1_MOUSE
P28571;P28571-1;P28571-2	Slc6a9	Sodium- and chloride-dependent glycine transporter 1;Isoform GlyT-1A of Sodium- and chloride-dependent glycine transporter 1;Isoform GlyT-1B of Sodium- and chloride-dependent glycine transporter 1	SC6A9_MOUSE
P28652	Camk2b	Calcium/calmodulin-dependent protein kinase type II subunit beta	KCC2B_MOUSE
P28656	Nap1l1	Nucleosome assembly protein 1-like 1	NP1L1_MOUSE
P28658	Atxn10	Ataxin-10	ATX10_MOUSE
P28660	Nckap1	Nck-associated protein 1	NCKP1_MOUSE
P28661;P28661-2;P28661-3;P28661-4;P28661-5	Septin4	Septin-4;Isoform 2 of Septin-4;Isoform 3 of Septin-4;Isoform 4 of Septin-4;Isoform 5 of Septin-4	SEPT4_MOUSE
P28663	Napb	Beta-soluble NSF attachment protein	SNAB_MOUSE
P28738	Kif5c	Kinesin heavy chain isoform 5C	KIF5C_MOUSE
P28740-2	Kif2a	Isoform 2 of Kinesin-like protein KIF2A	KIF2A_MOUSE
P28798	Grn	Progranulin	GRN_MOUSE
P29341	Pabpc1	Polyadenylate-binding protein 1	PABP1_MOUSE
P29416	Hexa	Beta-hexosaminidase subunit alpha	HEXA_MOUSE
P30275	Ckmt1	Creatine kinase U-type, mitochondrial	KCRU_MOUSE
P30416	Fkbp4	Peptidyl-prolyl cis-trans isomerase FKBP4	FKBP4_MOUSE
P30548	Tacr1	Substance-P receptor	NK1R_MOUSE
P30681	Hmgb2	High mobility group protein B2	HMGB2_MOUSE
P30999;P30999-2;P30999-3	Ctnnd1	Catenin delta-1;Isoform 2 of Catenin delta-1;Isoform 3 of Catenin delta-1	CTND1_MOUSE
P31324	Prkar2b	cAMP-dependent protein kinase type II-beta regulatory subunit	KAP3_MOUSE
P31648	Slc6a1	Sodium- and chloride-dependent GABA transporter 1	SC6A1_MOUSE
P31650	Slc6a11	Sodium- and chloride-dependent GABA transporter 3	S6A11_MOUSE
P31725	S100a9	Protein S100-A9	S10A9_MOUSE
P31750	Akt1	RAC-alpha serine/threonine-protein kinase	AKT1_MOUSE
P31786	Dbi	Acyl-CoA-binding protein	ACBP_MOUSE
P31938	Map2k1	Dual specificity mitogen-activated protein kinase kinase 1	MP2K1_MOUSE
P32037	Slc2a3	Solute carrier family 2, facilitated glucose transporter member 3	GTR3_MOUSE
P32211	Chrm4	Muscarinic acetylcholine receptor M4	ACM4_MOUSE
P32921;P32921-2	Wars1	Tryptophan--tRNA ligase, cytoplasmic;Isoform 2 of Tryptophan--tRNA ligase, cytoplasmic	SYWC_MOUSE
P33173	Kif1a	Kinesin-like protein KIF1A	KIF1A_MOUSE
P33175	Kif5a	Kinesin heavy chain isoform 5A	KIF5A_MOUSE
P34022	Ranbp1	Ran-specific GTPase-activating protein	RANG_MOUSE
P34152;P34152-2;P34152-4	Ptk2	Focal adhesion kinase 1;Isoform 2 of Focal adhesion kinase 1;Isoform 4 of Focal adhesion kinase 1	FAK1_MOUSE
P34884	Mif	Macrophage migration inhibitory factor	MIF_MOUSE
P35123	Usp4	Ubiquitin carboxyl-terminal hydrolase 4	UBP4_MOUSE
P35235	Ptpn11	Tyrosine-protein phosphatase non-receptor type 11	PTN11_MOUSE
P35242	Sftpa1	Pulmonary surfactant-associated protein A	SFTPA_MOUSE
P35276	Rab3d	Ras-related protein Rab-3D	RAB3D_MOUSE
P35278	Rab5c	Ras-related protein Rab-5C	RAB5C_MOUSE
P35279	Rab6a	Ras-related protein Rab-6A	RAB6A_MOUSE
P35282	Rab21	Ras-related protein Rab-21	RAB21_MOUSE
P35283	Rab12	Ras-related protein Rab-12	RAB12_MOUSE
P35290	Rab24	Ras-related protein Rab-24	RAB24_MOUSE
P35293	Rab18	Ras-related protein Rab-18	RAB18_MOUSE
P35438;P35438-2	Grin1	Glutamate receptor ionotropic, NMDA 1;Isoform 2 of Glutamate receptor ionotropic, NMDA 1	NMDZ1_MOUSE
P35486	Pdha1	Pyruvate dehydrogenase E1 component subunit alpha, somatic form, mitochondrial	ODPA_MOUSE
P35492	Hal	Histidine ammonia-lyase	HUTH_MOUSE
P35546	Ret	Proto-oncogene tyrosine-protein kinase receptor Ret	RET_MOUSE
P35564	Canx	Calnexin	CALX_MOUSE
P35585	Ap1m1	AP-1 complex subunit mu-1	AP1M1_MOUSE
P35700	Prdx1	Peroxiredoxin-1	PRDX1_MOUSE
P35762	Cd81	CD81 antigen	CD81_MOUSE
P35802	Gpm6a	Neuronal membrane glycoprotein M6-a	GPM6A_MOUSE
P35803;P35803-8	Gpm6b	Neuronal membrane glycoprotein M6-b;Isoform 8 of Neuronal membrane glycoprotein M6-b	GPM6B_MOUSE
P35803-2;P35803-4	Gpm6b	Isoform 2 of Neuronal membrane glycoprotein M6-b;Isoform 4 of Neuronal membrane glycoprotein M6-b	GPM6B_MOUSE
P35922;P35922-2;P35922-3;P35922-7;P35922-8;P35922-9	Fmr1	Synaptic functional regulator FMR1;Isoform 2 of Synaptic functional regulator FMR1;Isoform 3 of Synaptic functional regulator FMR1;Isoform 7 of Synaptic functional regulator FMR1;Isoform 8 of Synaptic functional regulator FMR1;Isoform 9 of Synaptic functional regulator FMR1	FMR1_MOUSE
P35979	Rpl12	60S ribosomal protein L12	RL12_MOUSE
P35980	Rpl18	60S ribosomal protein L18	RL18_MOUSE
P36536	Sar1a	GTP-binding protein SAR1a	SAR1A_MOUSE
P36916	Gnl1	Guanine nucleotide-binding protein-like 1	GNL1_MOUSE
P37040	Por	NADPH--cytochrome P450 reductase	NCPR_MOUSE
P38647	Hspa9	Stress-70 protein, mitochondrial	GRP75_MOUSE
P39053;P39053-4;P39053-5	Dnm1	Dynamin-1;Isoform 4 of Dynamin-1;Isoform 5 of Dynamin-1	DYN1_MOUSE
P39053-3	Dnm1	Isoform 3 of Dynamin-1	DYN1_MOUSE
P39054;P39054-2	Dnm2	Dynamin-2;Isoform 2 of Dynamin-2	DYN2_MOUSE
P39688	Fyn	Tyrosine-protein kinase Fyn	FYN_MOUSE
P40124	Cap1	Adenylyl cyclase-associated protein 1	CAP1_MOUSE
P40142	Tkt	Transketolase	TKT_MOUSE
P40237	Cd82	CD82 antigen	CD82_MOUSE
P40240	Cd9	CD9 antigen	CD9_MOUSE
P40336;P40336-2	Vps26a	Vacuolar protein sorting-associated protein 26A;Isoform 2 of Vacuolar protein sorting-associated protein 26A	VP26A_MOUSE
P40694	Ighmbp2	DNA-binding protein SMUBP-2	SMBP2_MOUSE
P41105	Rpl28	60S ribosomal protein L28	RL28_MOUSE
P41216	Acsl1	Long-chain-fatty-acid--CoA ligase 1	ACSL1_MOUSE
P41241	Csk	Tyrosine-protein kinase CSK	CSK_MOUSE
P42225	Stat1	Signal transducer and activator of transcription 1	STAT1_MOUSE
P42227;P42227-2;P42227-3	Stat3	Signal transducer and activator of transcription 3;Isoform Stat3B of Signal transducer and activator of transcription 3;Isoform Del-701 of Signal transducer and activator of transcription 3	STAT3_MOUSE
P42232	Stat5b	Signal transducer and activator of transcription 5B	STA5B_MOUSE
P42567	Eps15	Epidermal growth factor receptor substrate 15	EPS15_MOUSE
P42669	Pura	Transcriptional activator protein Pur-alpha	PURA_MOUSE
P42859;P42859-2	Htt	Huntingtin;Isoform Short of Huntingtin	HD_MOUSE
P42867	Dpagt1	UDP-N-acetylglucosamine--dolichyl-phosphate N-acetylglucosaminephosphotransferase	GPT_MOUSE
P42925	Pxmp2	Peroxisomal membrane protein 2	PXMP2_MOUSE
P42932	Cct8	T-complex protein 1 subunit theta	TCPQ_MOUSE
P43006	Slc1a2	Excitatory amino acid transporter 2	EAA2_MOUSE
P43024	Cox6a1	Cytochrome c oxidase subunit 6A1, mitochondrial	CX6A1_MOUSE
P43274	H1-4	Histone H1.4	H14_MOUSE
P43276	H1-5	Histone H1.5	H15_MOUSE
P43277	H1-3	Histone H1.3	H13_MOUSE
P43407	Sdc2	Syndecan-2	SDC2_MOUSE
P45376	Akr1b1	Aldo-keto reductase family 1 member B1	ALDR_MOUSE
P45878	Fkbp2	Peptidyl-prolyl cis-trans isomerase FKBP2	FKBP2_MOUSE
P46061	Rangap1	Ran GTPase-activating protein 1	RAGP1_MOUSE
P46096	Syt1	Synaptotagmin-1	SYT1_MOUSE
P46414	Cdkn1b	Cyclin-dependent kinase inhibitor 1B	CDN1B_MOUSE
P46460	Nsf	Vesicle-fusing ATPase	NSF_MOUSE
P46471	Psmc2	26S proteasome regulatory subunit 7	PRS7_MOUSE
P46638	Rab11b	Ras-related protein Rab-11B	RB11B_MOUSE
P46660	Ina	Alpha-internexin	AINX_MOUSE
P46664	Adss2	Adenylosuccinate synthetase isozyme 2	PURA2_MOUSE
P46737	Brcc3	Lys-63-specific deubiquitinase BRCC36	BRCC3_MOUSE
P46935	Nedd4	E3 ubiquitin-protein ligase NEDD4	NEDD4_MOUSE
P46978	Stt3a	Dolichyl-diphosphooligosaccharide--protein glycosyltransferase subunit STT3A	STT3A_MOUSE
P47199	Cryz	Quinone oxidoreductase	QOR_MOUSE
P47708	Rph3a	Rabphilin-3A	RP3A_MOUSE
P47738	Aldh2	Aldehyde dehydrogenase, mitochondrial	ALDH2_MOUSE
P47746	Cnr1	Cannabinoid receptor 1	CNR1_MOUSE
P47753	Capza1	F-actin-capping protein subunit alpha-1	CAZA1_MOUSE
P47754	Capza2	F-actin-capping protein subunit alpha-2	CAZA2_MOUSE
P47757-2	Capzb	Isoform 2 of F-actin-capping protein subunit beta	CAPZB_MOUSE
P47791;P47791-2	Gsr	Glutathione reductase, mitochondrial;Isoform Cytoplasmic of Glutathione reductase, mitochondrial	GSHR_MOUSE
P47802	Mtx1	Metaxin-1	MTX1_MOUSE
P47809	Map2k4	Dual specificity mitogen-activated protein kinase kinase 4	MP2K4_MOUSE
P47856;P47856-2	Gfpt1	Glutamine--fructose-6-phosphate aminotransferase [isomerizing] 1;Isoform 2 of Glutamine--fructose-6-phosphate aminotransferase [isomerizing] 1	GFPT1_MOUSE
P47857	Pfkm	ATP-dependent 6-phosphofructokinase, muscle type	PFKAM_MOUSE
P47911	Rpl6	60S ribosomal protein L6	RL6_MOUSE
P47915	Rpl29	60S ribosomal protein L29	RL29_MOUSE
P47941	Crkl	Crk-like protein	CRKL_MOUSE
P47962	Rpl5	60S ribosomal protein L5	RL5_MOUSE
P47963	Rpl13	60S ribosomal protein L13	RL13_MOUSE
P47964	Rpl36	60S ribosomal protein L36	RL36_MOUSE
P47968	Rpia	Ribose-5-phosphate isomerase	RPIA_MOUSE
P48036	Anxa5	Annexin A5	ANXA5_MOUSE
P48320	Gad2	Glutamate decarboxylase 2	DCE2_MOUSE
P48453;P48453-2	Ppp3cb	Serine/threonine-protein phosphatase 2B catalytic subunit beta isoform;Isoform 1 of Serine/threonine-protein phosphatase 2B catalytic subunit beta isoform	PP2BB_MOUSE
P48542;P48542-2	Kcnj6	G protein-activated inward rectifier potassium channel 2;Isoform GIRK2-1 of G protein-activated inward rectifier potassium channel 2	KCNJ6_MOUSE
P48722	Hspa4l	Heat shock 70 kDa protein 4L	HS74L_MOUSE
P48758	Cbr1	Carbonyl reductase [NADPH] 1	CBR1_MOUSE
P48771	Cox7a2	Cytochrome c oxidase subunit 7A2, mitochondrial	CX7A2_MOUSE
P48774	Gstm5	Glutathione S-transferase Mu 5	GSTM5_MOUSE
P48962	Slc25a4	ADP/ATP translocase 1	ADT1_MOUSE
P49025;P49025-3;P49025-4;P49025-5	Cit	Citron Rho-interacting kinase;Isoform 3 of Citron Rho-interacting kinase;Isoform 4 of Citron Rho-interacting kinase;Isoform 5 of Citron Rho-interacting kinase	CTRO_MOUSE
P49135	Ercc3	General transcription and DNA repair factor IIH helicase subunit XPB	ERCC3_MOUSE
P49312	Hnrnpa1	Heterogeneous nuclear ribonucleoprotein A1	ROA1_MOUSE
P49442	Inpp1	Inositol polyphosphate 1-phosphatase	INPP_MOUSE
P49443	Ppm1a	Protein phosphatase 1A	PPM1A_MOUSE
P49446;P49446-2;P49446-3	Ptpre	Receptor-type tyrosine-protein phosphatase epsilon;Isoform 2 of Receptor-type tyrosine-protein phosphatase epsilon;Isoform 3 of Receptor-type tyrosine-protein phosphatase epsilon	PTPRE_MOUSE
P49615	Cdk5	Cyclin-dependent-like kinase 5	CDK5_MOUSE
P49722	Psma2	Proteasome subunit alpha type-2	PSA2_MOUSE
P49769;Q61144;Q61144-2	Psen1;Psen2;Psen2	Presenilin-1;Presenilin-2;Isoform 2 of Presenilin-2	PSN1_MOUSE;PSN2_MOUSE;PSN2_MOUSE
P50114	S100b	Protein S100-B	S100B_MOUSE
P50153	Gng4	Guanine nucleotide-binding protein G(I)/G(S)/G(O) subunit gamma-4	GBG4_MOUSE
P50247	Ahcy	Adenosylhomocysteinase	SAHH_MOUSE
P50396	Gdi1	Rab GDP dissociation inhibitor alpha	GDIA_MOUSE
P50405	Sftpb	Pulmonary surfactant-associated protein B	PSPB_MOUSE
P50427	Sts	Steryl-sulfatase	STS_MOUSE
P50429	Arsb	Arylsulfatase B	ARSB_MOUSE
P50516	Atp6v1a	V-type proton ATPase catalytic subunit A	VATA_MOUSE
P50518	Atp6v1e1	V-type proton ATPase subunit E 1	VATE1_MOUSE
P50543	S100a11	Protein S100-A11	S10AB_MOUSE
P50571	Gabrb1	Gamma-aminobutyric acid receptor subunit beta-1	GBRB1_MOUSE
P50586	Tub	Tubby protein	TUB_MOUSE
P51125;P51125-2;P51125-3;P51125-6	Cast	Calpastatin;Isoform 2 of Calpastatin;Isoform 3 of Calpastatin;Isoform 6 of Calpastatin	ICAL_MOUSE
P51141	Dvl1	Segment polarity protein dishevelled homolog DVL-1	DVL1_MOUSE
P51150	Rab7a	Ras-related protein Rab-7a	RAB7A_MOUSE
P51410	Rpl9	60S ribosomal protein L9	RL9_MOUSE
P51569	Gla	Alpha-galactosidase A	AGAL_MOUSE
P51660	Hsd17b4	Peroxisomal multifunctional enzyme type 2	DHB4_MOUSE
P51667	Myl2	Myosin regulatory light chain 2, ventricular/cardiac muscle isoform	MLRV_MOUSE
P51830	Adcy9	Adenylate cyclase type 9	ADCY9_MOUSE
P51855	Gss	Glutathione synthetase	GSHB_MOUSE
P51859	Hdgf	Hepatoma-derived growth factor	HDGF_MOUSE
P51863	Atp6v0d1	V-type proton ATPase subunit d 1	VA0D1_MOUSE
P51880	Fabp7	Fatty acid-binding protein, brain	FABP7_MOUSE
P51881	Slc25a5	ADP/ATP translocase 2	ADT2_MOUSE
P51906	Slc1a1	Excitatory amino acid transporter 3	EAA3_MOUSE
P52196	Tst	Thiosulfate sulfurtransferase	THTR_MOUSE
P52479;P52479-2	Usp10	Ubiquitin carboxyl-terminal hydrolase 10;Isoform 2 of Ubiquitin carboxyl-terminal hydrolase 10	UBP10_MOUSE
P52480	Pkm	Pyruvate kinase PKM	KPYM_MOUSE
P52480-2	Pkm	Isoform M1 of Pyruvate kinase PKM	KPYM_MOUSE
P52503	Ndufs6	NADH dehydrogenase [ubiquinone] iron-sulfur protein 6, mitochondrial	NDUS6_MOUSE
P52760	Rida	2-iminobutanoate/2-iminopropanoate deaminase	RIDA_MOUSE
P53026	Rpl10a	60S ribosomal protein L10a	RL10A_MOUSE
P53395	Dbt	Lipoamide acyltransferase component of branched-chain alpha-keto acid dehydrogenase complex, mitochondrial	ODB2_MOUSE
P53612	Rabggtb	Geranylgeranyl transferase type-2 subunit beta	PGTB2_MOUSE
P53776	Lhx4	LIM/homeobox protein Lhx4	LHX4_MOUSE
P53810	Pitpna	Phosphatidylinositol transfer protein alpha isoform	PIPNA_MOUSE
P53986	Slc16a1	Monocarboxylate transporter 1	MOT1_MOUSE
P53994	Rab2a	Ras-related protein Rab-2A	RAB2A_MOUSE
P53996;P53996-2;P53996-3	Cnbp	Cellular nucleic acid-binding protein;Isoform 2 of Cellular nucleic acid-binding protein;Isoform 3 of Cellular nucleic acid-binding protein	CNBP_MOUSE
P54071	Idh2	Isocitrate dehydrogenase [NADP], mitochondrial	IDHP_MOUSE
P54227	Stmn1	Stathmin	STMN1_MOUSE
P54285	Cacnb3	Voltage-dependent L-type calcium channel subunit beta-3	CACB3_MOUSE
P54728	Rad23b	UV excision repair protein RAD23 homolog B	RD23B_MOUSE
P54775	Psmc4	26S proteasome regulatory subunit 6B	PRS6B_MOUSE
P54822	Adsl	Adenylosuccinate lyase	PUR8_MOUSE
P54823	Ddx6	Probable ATP-dependent RNA helicase DDX6	DDX6_MOUSE
P54830;P54830-2	Ptpn5	Tyrosine-protein phosphatase non-receptor type 5;Isoform STEP46 of Tyrosine-protein phosphatase non-receptor type 5	PTN5_MOUSE
P54923	Adprh	[Protein ADP-ribosylarginine] hydrolase	ADPRH_MOUSE
P55012	Slc12a2	Solute carrier family 12 member 2	S12A2_MOUSE
P55066	Ncan	Neurocan core protein	NCAN_MOUSE
P55088;P55088-3	Aqp4	Aquaporin-4;Isoform 3 of Aquaporin-4	AQP4_MOUSE
P55096	Abcd3	ATP-binding cassette sub-family D member 3	ABCD3_MOUSE
P55097	Ctsk	Cathepsin K	CATK_MOUSE
P55258	Rab8a	Ras-related protein Rab-8A	RAB8A_MOUSE
P55288	Cdh11	Cadherin-11	CAD11_MOUSE
P55302	Lrpap1	Alpha-2-macroglobulin receptor-associated protein	AMRP_MOUSE
P55821	Stmn2	Stathmin-2	STMN2_MOUSE
P56135	Atp5mf	ATP synthase subunit f, mitochondrial	ATPK_MOUSE
P56212	Arpp19	cAMP-regulated phosphoprotein 19	ARP19_MOUSE
P56371	Rab4a	Ras-related protein Rab-4A	RAB4A_MOUSE
P56375	Acyp2	Acylphosphatase-2	ACYP2_MOUSE
P56379	Atp5mpl	ATP synthase subunit ATP5MPL, mitochondrial	ATP68_MOUSE
P56383;P56384;Q9CR84	Atp5mc2;Atp5mc3;Atp5mc1	ATP synthase F(0) complex subunit C2, mitochondrial;ATP synthase F(0) complex subunit C3, mitochondrial;ATP synthase F(0) complex subunit C1, mitochondrial	AT5G2_MOUSE;AT5G3_MOUSE;AT5G1_MOUSE
P56387	Dynlt3	Dynein light chain Tctex-type 3	DYLT3_MOUSE
P56389	Cda	Cytidine deaminase	CDD_MOUSE
P56391	Cox6b1	Cytochrome c oxidase subunit 6B1	CX6B1_MOUSE
P56395	Cyb5a	Cytochrome b5	CYB5_MOUSE
P56399	Usp5	Ubiquitin carboxyl-terminal hydrolase 5	UBP5_MOUSE
P56480	Atp5f1b	ATP synthase subunit beta, mitochondrial	ATPB_MOUSE
P56546;P56546-2	Ctbp2	C-terminal-binding protein 2;Isoform 2 of C-terminal-binding protein 2	CTBP2_MOUSE
P56564	Slc1a3	Excitatory amino acid transporter 1	EAA1_MOUSE
P56565	S100a1	Protein S100-A1	S10A1_MOUSE
P56695	Wfs1	Wolframin	WFS1_MOUSE
P56812	Pdcd5	Programmed cell death protein 5	PDCD5_MOUSE
P56873	Znrd2	Protein ZNRD2	ZNRD2_MOUSE
P56959	Fus	RNA-binding protein FUS	FUS_MOUSE
P57716	Ncstn	Nicastrin	NICA_MOUSE
P57724	Pcbp4	Poly(rC)-binding protein 4	PCBP4_MOUSE
P57746	Atp6v1d	V-type proton ATPase subunit D	VATD_MOUSE
P57759	Erp29	Endoplasmic reticulum resident protein 29	ERP29_MOUSE
P57776	Eef1d	Elongation factor 1-delta	EF1D_MOUSE
P57780	Actn4	Alpha-actinin-4	ACTN4_MOUSE
P57787	Slc16a3	Monocarboxylate transporter 4	MOT4_MOUSE
P58021	Tm9sf2	Transmembrane 9 superfamily member 2	TM9S2_MOUSE
P58252	Eef2	Elongation factor 2	EF2_MOUSE
P58281;P58281-2	Opa1	Dynamin-like 120 kDa protein, mitochondrial;Isoform 2 of Dynamin-like 120 kDa protein, mitochondrial	OPA1_MOUSE
P58389	Ptpa	Serine/threonine-protein phosphatase 2A activator	PTPA_MOUSE
P58391	Kcnn3	Small conductance calcium-activated potassium channel protein 3	KCNN3_MOUSE
P58404;P58404-2	Strn4	Striatin-4;Isoform 2 of Striatin-4	STRN4_MOUSE
P58771	Tpm1	Tropomyosin alpha-1 chain	TPM1_MOUSE
P58771-2	Tpm1	Isoform 2 of Tropomyosin alpha-1 chain	TPM1_MOUSE
P58774-2	Tpm2	Isoform 2 of Tropomyosin beta chain	TPM2_MOUSE
P58871	Tnks1bp1	182 kDa tankyrase-1-binding protein	TB182_MOUSE
P59017	Bcl2l13	Bcl-2-like protein 13	B2L13_MOUSE
P59108	Cpne2	Copine-2	CPNE2_MOUSE
P59266	Fitm2	Fat storage-inducing transmembrane protein 2	FITM2_MOUSE
P59279	Rab2b	Ras-related protein Rab-2B	RAB2B_MOUSE
P59325	Eif5	Eukaryotic translation initiation factor 5	IF5_MOUSE
P59326	Ythdf1	YTH domain-containing family protein 1	YTHD1_MOUSE
P59328;P59328-2;P59328-3	Wdhd1	WD repeat and HMG-box DNA-binding protein 1;Isoform 2 of WD repeat and HMG-box DNA-binding protein 1;Isoform 3 of WD repeat and HMG-box DNA-binding protein 1	WDHD1_MOUSE
P59481	Lman2l	VIP36-like protein	LMA2L_MOUSE
P59648	Fxyd7	FXYD domain-containing ion transport regulator 7	FXYD7_MOUSE
P59672;P59672-2	Anks1a	Ankyrin repeat and SAM domain-containing protein 1A;Isoform 2 of Ankyrin repeat and SAM domain-containing protein 1A	ANS1A_MOUSE
P59999	Arpc4	Actin-related protein 2/3 complex subunit 4	ARPC4_MOUSE
P60122	Ruvbl1	RuvB-like 1	RUVB1_MOUSE
P60202	Plp1	Myelin proteolipid protein	MYPR_MOUSE
P60229	Eif3e	Eukaryotic translation initiation factor 3 subunit E	EIF3E_MOUSE
P60335	Pcbp1	Poly(rC)-binding protein 1	PCBP1_MOUSE
P60469	Ppfia3	Liprin-alpha-3	LIPA3_MOUSE
P60487	Pdxp	Pyridoxal phosphate phosphatase	PLPP_MOUSE
P60521	Gabarapl2	Gamma-aminobutyric acid receptor-associated protein-like 2	GBRL2_MOUSE
P60603	Romo1	Reactive oxygen species modulator 1	ROMO1_MOUSE
P60710	Actb	Actin, cytoplasmic 1	ACTB_MOUSE
P60761	Nrgn	Neurogranin	NEUG_MOUSE
P60764	Rac3	Ras-related C3 botulinum toxin substrate 3	RAC3_MOUSE
P60766	Cdc42	Cell division control protein 42 homolog	CDC42_MOUSE
P60766-1	Cdc42	Isoform 1 of Cell division control protein 42 homolog	CDC42_MOUSE
P60824	Cirbp	Cold-inducible RNA-binding protein	CIRBP_MOUSE
P60840;P60840-2	Ensa	Alpha-endosulfine;Isoform 2 of Alpha-endosulfine	ENSA_MOUSE
P60843	Eif4a1	Eukaryotic initiation factor 4A-I	IF4A1_MOUSE
P60879	Snap25	Synaptosomal-associated protein 25	SNP25_MOUSE
P60879-2	Snap25	Isoform 2 of Synaptosomal-associated protein 25	SNP25_MOUSE
P60904	Dnajc5	DnaJ homolog subfamily C member 5	DNJC5_MOUSE
P61014	Pln	Cardiac phospholamban	PPLA_MOUSE
P61021	Rab5b	Ras-related protein Rab-5B	RAB5B_MOUSE
P61027	Rab10	Ras-related protein Rab-10	RAB10_MOUSE
P61028	Rab8b	Ras-related protein Rab-8B	RAB8B_MOUSE
P61079;P62838	Ube2d3;Ube2d2	Ubiquitin-conjugating enzyme E2 D3;Ubiquitin-conjugating enzyme E2 D2	UB2D3_MOUSE;UB2D2_MOUSE
P61082	Ube2m	NEDD8-conjugating enzyme Ubc12	UBC12_MOUSE
P61087	Ube2k	Ubiquitin-conjugating enzyme E2 K	UBE2K_MOUSE
P61089	Ube2n	Ubiquitin-conjugating enzyme E2 N	UBE2N_MOUSE
P61148	Fgf1	Fibroblast growth factor 1	FGF1_MOUSE
P61161	Actr2	Actin-related protein 2	ARP2_MOUSE
P61164	Actr1a	Alpha-centractin	ACTZ_MOUSE
P61202;P61202-2	Cops2	COP9 signalosome complex subunit 2;Isoform 2 of COP9 signalosome complex subunit 2	CSN2_MOUSE
P61205;P84078	Arf3;Arf1	ADP-ribosylation factor 3;ADP-ribosylation factor 1	ARF3_MOUSE;ARF1_MOUSE
P61211	Arl1	ADP-ribosylation factor-like protein 1	ARL1_MOUSE
P61226	Rap2b	Ras-related protein Rap-2b	RAP2B_MOUSE
P61255	Rpl26	60S ribosomal protein L26	RL26_MOUSE
P61264	Stx1b	Syntaxin-1B	STX1B_MOUSE
P61290	Psme3	Proteasome activator complex subunit 3	PSME3_MOUSE
P61294	Rab6b	Ras-related protein Rab-6B	RAB6B_MOUSE
P61329;P61329-2	Fgf12	Fibroblast growth factor 12;Isoform 2 of Fibroblast growth factor 12	FGF12_MOUSE
P61358	Rpl27	60S ribosomal protein L27	RL27_MOUSE
P61514	Rpl37a	60S ribosomal protein L37a	RL37A_MOUSE
P61620	Sec61a1	Protein transport protein Sec61 subunit alpha isoform 1	S61A1_MOUSE
P61750	Arf4	ADP-ribosylation factor 4	ARF4_MOUSE
P61759	Vbp1	Prefoldin subunit 3	PFD3_MOUSE
P61804	Dad1	Dolichyl-diphosphooligosaccharide--protein glycosyltransferase subunit DAD1	DAD1_MOUSE
P61922	Abat	4-aminobutyrate aminotransferase, mitochondrial	GABT_MOUSE
P61924	Copz1	Coatomer subunit zeta-1	COPZ1_MOUSE
P61957	Sumo2	Small ubiquitin-related modifier 2	SUMO2_MOUSE
P61961	Ufm1	Ubiquitin-fold modifier 1	UFM1_MOUSE
P61967	Ap1s1	AP-1 complex subunit sigma-1A	AP1S1_MOUSE
P61971	Nutf2	Nuclear transport factor 2	NTF2_MOUSE
P61979-3	Hnrnpk	Isoform 3 of Heterogeneous nuclear ribonucleoprotein K	HNRPK_MOUSE
P61982	Ywhag	14-3-3 protein gamma	1433G_MOUSE
P62069;Q9D9M2;Q9D9M2-2	Usp46;Usp12;Usp12	Ubiquitin carboxyl-terminal hydrolase 46;Ubiquitin carboxyl-terminal hydrolase 12;Isoform 2 of Ubiquitin carboxyl-terminal hydrolase 12	UBP46_MOUSE;UBP12_MOUSE;UBP12_MOUSE
P62071	Rras2	Ras-related protein R-Ras2	RRAS2_MOUSE
P62075	Timm13	Mitochondrial import inner membrane translocase subunit Tim13	TIM13_MOUSE
P62082	Rps7	40S ribosomal protein S7	RS7_MOUSE
P62137	Ppp1ca	Serine/threonine-protein phosphatase PP1-alpha catalytic subunit	PP1A_MOUSE
P62141	Ppp1cb	Serine/threonine-protein phosphatase PP1-beta catalytic subunit	PP1B_MOUSE
P62192	Psmc1	26S proteasome regulatory subunit 4	PRS4_MOUSE
P62196	Psmc5	26S proteasome regulatory subunit 8	PRS8_MOUSE
P62242	Rps8	40S ribosomal protein S8	RS8_MOUSE
P62245	Rps15a	40S ribosomal protein S15a	RS15A_MOUSE
P62257	Ube2h	Ubiquitin-conjugating enzyme E2 H	UBE2H_MOUSE
P62259	Ywhae	14-3-3 protein epsilon	1433E_MOUSE
P62264	Rps14	40S ribosomal protein S14	RS14_MOUSE
P62267	Rps23	40S ribosomal protein S23	RS23_MOUSE
P62270	Rps18	40S ribosomal protein S18	RS18_MOUSE
P62281	Rps11	40S ribosomal protein S11	RS11_MOUSE
P62301	Rps13	40S ribosomal protein S13	RS13_MOUSE
P62305	Snrpe	Small nuclear ribonucleoprotein E	RUXE_MOUSE
P62311	Lsm3	U6 snRNA-associated Sm-like protein LSm3	LSM3_MOUSE
P62320	Snrpd3	Small nuclear ribonucleoprotein Sm D3	SMD3_MOUSE
P62331	Arf6	ADP-ribosylation factor 6	ARF6_MOUSE
P62334	Psmc6	26S proteasome regulatory subunit 10B	PRS10_MOUSE
P62342	Selenot	Thioredoxin reductase-like selenoprotein T	SELT_MOUSE
P62482	Kcnab2	Voltage-gated potassium channel subunit beta-2	KCAB2_MOUSE
P62484	Abi2	Abl interactor 2	ABI2_MOUSE
P62500;P62500-3	Tsc22d1	TSC22 domain family protein 1;Isoform 3 of TSC22 domain family protein 1	T22D1_MOUSE
P62631	Eef1a2	Elongation factor 1-alpha 2	EF1A2_MOUSE
P62702	Rps4x	40S ribosomal protein S4, X isoform	RS4X_MOUSE
P62715	Ppp2cb	Serine/threonine-protein phosphatase 2A catalytic subunit beta isoform	PP2AB_MOUSE
P62717	Rpl18a	60S ribosomal protein L18a	RL18A_MOUSE
P62743	Ap2s1	AP-2 complex subunit sigma	AP2S1_MOUSE
P62746	Rhob	Rho-related GTP-binding protein RhoB	RHOB_MOUSE
P62748	Hpcal1	Hippocalcin-like protein 1	HPCL1_MOUSE
P62751	Rpl23a	60S ribosomal protein L23a	RL23A_MOUSE
P62754	Rps6	40S ribosomal protein S6	RS6_MOUSE
P62761	Vsnl1	Visinin-like protein 1	VISL1_MOUSE
P62774	Mtpn	Myotrophin	MTPN_MOUSE
P62806	H4c1	Histone H4	H4_MOUSE
P62812	Gabra1	Gamma-aminobutyric acid receptor subunit alpha-1	GBRA1_MOUSE
P62814	Atp6v1b2	V-type proton ATPase subunit B, brain isoform	VATB2_MOUSE
P62821	Rab1A	Ras-related protein Rab-1A	RAB1A_MOUSE
P62823	Rab3c	Ras-related protein Rab-3C	RAB3C_MOUSE
P62827	Ran	GTP-binding nuclear protein Ran	RAN_MOUSE
P62830	Rpl23	60S ribosomal protein L23	RL23_MOUSE
P62835	Rap1a	Ras-related protein Rap-1A	RAP1A_MOUSE
P62849;P62849-2;P62849-3	Rps24	40S ribosomal protein S24;Isoform 2 of 40S ribosomal protein S24;Isoform 3 of 40S ribosomal protein S24	RS24_MOUSE
P62852	Rps25	40S ribosomal protein S25	RS25_MOUSE
P62855	Rps26	40S ribosomal protein S26	RS26_MOUSE
P62862	Fau	40S ribosomal protein S30	RS30_MOUSE
P62874	Gnb1	Guanine nucleotide-binding protein G(I)/G(S)/G(T) subunit beta-1	GBB1_MOUSE
P62878	Rbx1	E3 ubiquitin-protein ligase RBX1	RBX1_MOUSE
P62880	Gnb2	Guanine nucleotide-binding protein G(I)/G(S)/G(T) subunit beta-2	GBB2_MOUSE
P62881-2	Gnb5	Isoform 2 of Guanine nucleotide-binding protein subunit beta-5	GNB5_MOUSE
P62889	Rpl30	60S ribosomal protein L30	RL30_MOUSE
P62897	Cycs	Cytochrome c, somatic	CYC_MOUSE
P62900	Rpl31	60S ribosomal protein L31	RL31_MOUSE
P62908	Rps3	40S ribosomal protein S3	RS3_MOUSE
P62911	Rpl32	60S ribosomal protein L32	RL32_MOUSE
P62918	Rpl8	60S ribosomal protein L8	RL8_MOUSE
P62962	Pfn1	Profilin-1	PROF1_MOUSE
P62996;P62996-2	Tra2b	Transformer-2 protein homolog beta;Isoform 2 of Transformer-2 protein homolog beta	TRA2B_MOUSE
P63001	Rac1	Ras-related C3 botulinum toxin substrate 1	RAC1_MOUSE
P63005	Pafah1b1	Platelet-activating factor acetylhydrolase IB subunit alpha	LIS1_MOUSE
P63011	Rab3a	Ras-related protein Rab-3A	RAB3A_MOUSE
P63017	Hspa8	Heat shock cognate 71 kDa protein	HSP7C_MOUSE
P63028	Tpt1	Translationally-controlled tumor protein	TCTP_MOUSE
P63030	Mpc1	Mitochondrial pyruvate carrier 1	MPC1_MOUSE
P63037	Dnaja1	DnaJ homolog subfamily A member 1	DNJA1_MOUSE
P63038	Hspd1	60 kDa heat shock protein, mitochondrial	CH60_MOUSE
P63040	Cplx1	Complexin-1	CPLX1_MOUSE
P63044	Vamp2	Vesicle-associated membrane protein 2	VAMP2_MOUSE
P63046	Sult4a1	Sulfotransferase 4A1	ST4A1_MOUSE
P63073	Eif4e	Eukaryotic translation initiation factor 4E	IF4E_MOUSE
P63080	Gabrb3	Gamma-aminobutyric acid receptor subunit beta-3	GBRB3_MOUSE
P63082	Atp6v0c	V-type proton ATPase 16 kDa proteolipid subunit	VATL_MOUSE
P63085	Mapk1	Mitogen-activated protein kinase 1	MK01_MOUSE
P63087;P63087-2	Ppp1cc	Serine/threonine-protein phosphatase PP1-gamma catalytic subunit;Isoform 2 of Serine/threonine-protein phosphatase PP1-gamma catalytic subunit	PP1G_MOUSE
P63094;P63094-3;Q6R0H7	Gnas	Guanine nucleotide-binding protein G(s) subunit alpha isoforms short;Isoform Gnas-3 of Guanine nucleotide-binding protein G(s) subunit alpha isoforms short;Guanine nucleotide-binding protein G(s) subunit alpha isoforms XLas	GNAS2_MOUSE;GNAS2_MOUSE;GNAS1_MOUSE
P63101	Ywhaz	14-3-3 protein zeta/delta	1433Z_MOUSE
P63137-2	Gabrb2	Isoform 2 of Gamma-aminobutyric acid receptor subunit beta-2	GBRB2_MOUSE
P63141	Kcna2	Potassium voltage-gated channel subfamily A member 2	KCNA2_MOUSE
P63158	Hmgb1	High mobility group protein B1	HMGB1_MOUSE
P63168	Dynll1	Dynein light chain 1, cytoplasmic	DYL1_MOUSE
P63213	Gng2	Guanine nucleotide-binding protein G(I)/G(S)/G(O) subunit gamma-2	GBG2_MOUSE
P63216	Gng3	Guanine nucleotide-binding protein G(I)/G(S)/G(O) subunit gamma-3	GBG3_MOUSE
P63242	Eif5a	Eukaryotic translation initiation factor 5A-1	IF5A1_MOUSE
P63254	Crip1	Cysteine-rich protein 1	CRIP1_MOUSE
P63260	Actg1	Actin, cytoplasmic 2	ACTG_MOUSE
P63276	Rps17	40S ribosomal protein S17	RS17_MOUSE
P63300	Selenow	Selenoprotein W	SELW_MOUSE
P63318	Prkcg	Protein kinase C gamma type	KPCG_MOUSE
P63321	Rala	Ras-related protein Ral-A	RALA_MOUSE
P63323	Rps12	40S ribosomal protein S12	RS12_MOUSE
P63325	Rps10	40S ribosomal protein S10	RS10_MOUSE
P63328	Ppp3ca	Serine/threonine-protein phosphatase 2B catalytic subunit alpha isoform	PP2BA_MOUSE
P63330	Ppp2ca	Serine/threonine-protein phosphatase 2A catalytic subunit alpha isoform	PP2AA_MOUSE
P67778	Phb	Prohibitin	PHB_MOUSE
P67871	Csnk2b	Casein kinase II subunit beta	CSK2B_MOUSE
P67984	Rpl22	60S ribosomal protein L22	RL22_MOUSE
P68033	Actc1	Actin, alpha cardiac muscle 1	ACTC_MOUSE
P68037	Ube2l3	Ubiquitin-conjugating enzyme E2 L3	UB2L3_MOUSE
P68040	Rack1	Receptor of activated protein C kinase 1	RACK1_MOUSE
P68181;P68181-2;P68181-3;P68181-4	Prkacb	cAMP-dependent protein kinase catalytic subunit beta;Isoform 2 of cAMP-dependent protein kinase catalytic subunit beta;Isoform 3 of cAMP-dependent protein kinase catalytic subunit beta;Isoform 4 of cAMP-dependent protein kinase catalytic subunit beta	KAPCB_MOUSE
P68254;P68254-2	Ywhaq	14-3-3 protein theta;Isoform 2 of 14-3-3 protein theta	1433T_MOUSE
P68368	Tuba4a	Tubulin alpha-4A chain	TBA4A_MOUSE
P68372	Tubb4b	Tubulin beta-4B chain	TBB4B_MOUSE
P68404-2	Prkcb	Isoform Beta-II of Protein kinase C beta type	KPCB_MOUSE
P68510	Ywhah	14-3-3 protein eta	1433F_MOUSE
P69566	Ranbp9	Ran-binding protein 9	RANB9_MOUSE
P70124	Serpinb5	Serpin B5	SPB5_MOUSE
P70168	Kpnb1	Importin subunit beta-1	IMB1_MOUSE
P70175	Dlg3	Disks large homolog 3	DLG3_MOUSE
P70188;P70188-2	Kifap3	Kinesin-associated protein 3;Isoform KAP3B of Kinesin-associated protein 3	KIFA3_MOUSE
P70195	Psmb7	Proteasome subunit beta type-7	PSB7_MOUSE
P70206	Plxna1	Plexin-A1	PLXA1_MOUSE
P70211;P70211-2;P70211-3	Dcc	Netrin receptor DCC;Isoform C of Netrin receptor DCC;Isoform B of Netrin receptor DCC	DCC_MOUSE
P70232	Chl1	Neural cell adhesion molecule L1-like protein	NCHL1_MOUSE
P70236	Map2k6	Dual specificity mitogen-activated protein kinase kinase 6	MP2K6_MOUSE
P70245	Ebp	3-beta-hydroxysteroid-Delta(8),Delta(7)-isomerase	EBP_MOUSE
P70265	Pfkfb2	6-phosphofructo-2-kinase/fructose-2,6-bisphosphatase 2	F262_MOUSE
P70268;P70268-2	Pkn1	Serine/threonine-protein kinase N1;Isoform 2 of Serine/threonine-protein kinase N1	PKN1_MOUSE
P70280	Vamp7	Vesicle-associated membrane protein 7	VAMP7_MOUSE
P70290	Mpp1	55 kDa erythrocyte membrane protein	EM55_MOUSE
P70296	Pebp1	Phosphatidylethanolamine-binding protein 1	PEBP1_MOUSE
P70297	Stam	Signal transducing adapter molecule 1	STAM1_MOUSE
P70302	Stim1	Stromal interaction molecule 1	STIM1_MOUSE
P70303;P70303-2;P70303-3	Ctps2	CTP synthase 2;Isoform 2 of CTP synthase 2;Isoform 3 of CTP synthase 2	PYRG2_MOUSE
P70318	Tial1	Nucleolysin TIAR	TIAR_MOUSE
P70333	Hnrnph2	Heterogeneous nuclear ribonucleoprotein H2	HNRH2_MOUSE
P70336;P70336-2	Rock2	Rho-associated protein kinase 2;Isoform 2 of Rho-associated protein kinase 2	ROCK2_MOUSE
P70349	Hint1	Histidine triad nucleotide-binding protein 1	HINT1_MOUSE
P70372	Elavl1	ELAV-like protein 1	ELAV1_MOUSE
P70392	Rasgrf2	Ras-specific guanine nucleotide-releasing factor 2	RGRF2_MOUSE
P70398	Usp9x	Probable ubiquitin carboxyl-terminal hydrolase FAF-X	USP9X_MOUSE
P70399;P70399-5	Tp53bp1	TP53-binding protein 1;Isoform 2 of TP53-binding protein 1	TP53B_MOUSE
P70404	Idh3g	Isocitrate dehydrogenase [NAD] subunit gamma 1, mitochondrial	IDHG1_MOUSE
P70414	Slc8a1	Sodium/calcium exchanger 1	NAC1_MOUSE
P70425	Rit2	GTP-binding protein Rit2	RIT2_MOUSE
P70429;P70429-2	Evl	Ena/VASP-like protein;Isoform 1 of Ena/VASP-like protein	EVL_MOUSE
P70441	Slc9a3r1	Na(+)/H(+) exchange regulatory cofactor NHE-RF1	NHRF1_MOUSE
P70445	Eif4ebp2	Eukaryotic translation initiation factor 4E-binding protein 2	4EBP2_MOUSE
P70663	Sparcl1	SPARC-like protein 1	SPRL1_MOUSE
P70670;Q60817	Naca	Nascent polypeptide-associated complex subunit alpha, muscle-specific form;Nascent polypeptide-associated complex subunit alpha	NACAM_MOUSE;NACA_MOUSE
P70671	Irf3	Interferon regulatory factor 3	IRF3_MOUSE
P70677	Casp3	Caspase-3	CASP3_MOUSE
P70689	Gjb6	Gap junction beta-6 protein	CXB6_MOUSE
P70694	Akr1c6	Estradiol 17 beta-dehydrogenase 5	DHB5_MOUSE
P70704;P70704-3	Atp8a1	Phospholipid-transporting ATPase IA;Isoform 3 of Phospholipid-transporting ATPase IA	AT8A1_MOUSE
P80313	Cct7	T-complex protein 1 subunit eta	TCPH_MOUSE
P80314	Cct2	T-complex protein 1 subunit beta	TCPB_MOUSE
P80315	Cct4	T-complex protein 1 subunit delta	TCPD_MOUSE
P80316	Cct5	T-complex protein 1 subunit epsilon	TCPE_MOUSE
P80317	Cct6a	T-complex protein 1 subunit zeta	TCPZ_MOUSE
P80318	Cct3	T-complex protein 1 subunit gamma	TCPG_MOUSE
P80560	Ptprn2	Receptor-type tyrosine-protein phosphatase N2	PTPR2_MOUSE
P81117	Nucb2	Nucleobindin-2	NUCB2_MOUSE
P83741;P83741-2;P83741-3;P83741-4;P83741-5	Wnk1	Serine/threonine-protein kinase WNK1;Isoform 2 of Serine/threonine-protein kinase WNK1;Isoform 3 of Serine/threonine-protein kinase WNK1;Isoform 4 of Serine/threonine-protein kinase WNK1;Isoform 5 of Serine/threonine-protein kinase WNK1	WNK1_MOUSE
P84075	Hpca	Neuron-specific calcium-binding protein hippocalcin	HPCA_MOUSE
P84084	Arf5	ADP-ribosylation factor 5	ARF5_MOUSE
P84086	Cplx2	Complexin-2	CPLX2_MOUSE
P84089	Erh	Enhancer of rudimentary homolog	ERH_MOUSE
P84091	Ap2m1	AP-2 complex subunit mu	AP2M1_MOUSE
P84096	Rhog	Rho-related GTP-binding protein RhoG	RHOG_MOUSE
P84099	Rpl19	60S ribosomal protein L19	RL19_MOUSE
P84104;P84104-2	Srsf3	Serine/arginine-rich splicing factor 3;Isoform Short of Serine/arginine-rich splicing factor 3	SRSF3_MOUSE
P84309	Adcy5	Adenylate cyclase type 5	ADCY5_MOUSE
P97300	Nptn	Neuroplastin	NPTN_MOUSE
P97315	Csrp1	Cysteine and glycine-rich protein 1	CSRP1_MOUSE
P97318;P97318-2;P97318-3;P97318-4;P97318-5;P97318-6;P97318-8	Dab1	Disabled homolog 1;Isoform DAB555 of Disabled homolog 1;Isoform DAB271 of Disabled homolog 1;Isoform DAB197 of Disabled homolog 1;Isoform DAB204 of Disabled homolog 1;Isoform DAB217 of Disabled homolog 1;Isoform DAB553 of Disabled homolog 1	DAB1_MOUSE
P97350	Pkp1	Plakophilin-1	PKP1_MOUSE
P97351	Rps3a	40S ribosomal protein S3a	RS3A_MOUSE
P97355	Sms	Spermine synthase	SPSY_MOUSE
P97370	Atp1b3	Sodium/potassium-transporting ATPase subunit beta-3	AT1B3_MOUSE
P97371	Psme1	Proteasome activator complex subunit 1	PSME1_MOUSE
P97372	Psme2	Proteasome activator complex subunit 2	PSME2_MOUSE
P97379	G3bp2	Ras GTPase-activating protein-binding protein 2	G3BP2_MOUSE
P97390	Vps45	Vacuolar protein sorting-associated protein 45	VPS45_MOUSE
P97393	Arhgap5	Rho GTPase-activating protein 5	RHG05_MOUSE
P97411	Ica1	Islet cell autoantigen 1	ICA69_MOUSE
P97412;P97412-2	Lyst	Lysosomal-trafficking regulator;Isoform 2 of Lysosomal-trafficking regulator	LYST_MOUSE
P97427	Crmp1	Dihydropyrimidinase-related protein 1	DPYL1_MOUSE
P97441	Slc30a3	Zinc transporter 3	ZNT3_MOUSE
P97445	Cacna1a	Voltage-dependent P/Q-type calcium channel subunit alpha-1A	CAC1A_MOUSE
P97447	Fhl1	Four and a half LIM domains protein 1	FHL1_MOUSE
P97450	Atp5pf	ATP synthase-coupling factor 6, mitochondrial	ATP5J_MOUSE
P97457	Mylpf	Myosin regulatory light chain 2, skeletal muscle isoform	MLRS_MOUSE
P97461	Rps5	40S ribosomal protein S5	RS5_MOUSE
P97494	Gclc	Glutamate--cysteine ligase catalytic subunit	GSH1_MOUSE
P97765	Wbp2	WW domain-binding protein 2	WBP2_MOUSE
P97772	Grm1	Metabotropic glutamate receptor 1	GRM1_MOUSE
P97792	Cxadr	Coxsackievirus and adenovirus receptor homolog	CXAR_MOUSE
P97797-2	Sirpa	Isoform 2 of Tyrosine-protein phosphatase non-receptor type substrate 1	SHPS1_MOUSE
P97798;P97798-2;P97798-3;P97798-4;P97798-5	Neo1	Neogenin;Isoform 2 of Neogenin;Isoform 3 of Neogenin;Isoform 4 of Neogenin;Isoform 5 of Neogenin	NEO1_MOUSE
P97807;P97807-2	Fh	Fumarate hydratase, mitochondrial;Isoform Cytoplasmic of Fumarate hydratase, mitochondrial	FUMH_MOUSE
P97822;P97822-2	Anp32e	Acidic leucine-rich nuclear phosphoprotein 32 family member E;Isoform 2 of Acidic leucine-rich nuclear phosphoprotein 32 family member E	AN32E_MOUSE
P97823;P97823-2	Lypla1	Acyl-protein thioesterase 1;Isoform 2 of Acyl-protein thioesterase 1	LYPA1_MOUSE
P97825	Jpt1	Jupiter microtubule associated homolog 1	JUPI1_MOUSE
P97858	Slc35b1	Solute carrier family 35 member B1	S35B1_MOUSE
P98084	Apba2	Amyloid-beta A4 precursor protein-binding family A member 2	APBA2_MOUSE
P98086	C1qa	Complement C1q subcomponent subunit A	C1QA_MOUSE
P98191	Cds1	Phosphatidate cytidylyltransferase 1	CDS1_MOUSE
P98200	Atp8a2	Phospholipid-transporting ATPase IB	AT8A2_MOUSE
P98203;P98203-2;P98203-4;P98203-5	Arvcf	Armadillo repeat protein deleted in velo-cardio-facial syndrome homolog;Isoform 2 of Armadillo repeat protein deleted in velo-cardio-facial syndrome homolog;Isoform 4 of Armadillo repeat protein deleted in velo-cardio-facial syndrome homolog;Isoform 5 of Armadillo repeat protein deleted in velo-cardio-facial syndrome homolog	ARVC_MOUSE
P99024	Tubb5	Tubulin beta-5 chain	TBB5_MOUSE
P99026	Psmb4	Proteasome subunit beta type-4	PSB4_MOUSE
P99027	Rplp2	60S acidic ribosomal protein P2	RLA2_MOUSE
P99029;P99029-2	Prdx5	Peroxiredoxin-5, mitochondrial;Isoform Cytoplasmic+peroxisomal of Peroxiredoxin-5, mitochondrial	PRDX5_MOUSE
Q00493	Cpe	Carboxypeptidase E	CBPE_MOUSE
Q00612	G6pdx	Glucose-6-phosphate 1-dehydrogenase X	G6PD1_MOUSE
Q00977	Gjb2	Gap junction beta-2 protein	CXB2_MOUSE
Q01063;Q01063-2	Pde4d	cAMP-specific 3',5'-cyclic phosphodiesterase 4D;Isoform 9 of cAMP-specific 3',5'-cyclic phosphodiesterase 4D	PDE4D_MOUSE
Q01065	Pde1b	Calcium/calmodulin-dependent 3',5'-cyclic nucleotide phosphodiesterase 1B	PDE1B_MOUSE
Q01097	Grin2b	Glutamate receptor ionotropic, NMDA 2B	NMDE2_MOUSE
Q01149	Col1a2	Collagen alpha-2(I) chain	CO1A2_MOUSE
Q01405	Sec23a	Protein transport protein Sec23A	SC23A_MOUSE
Q01768	Nme2	Nucleoside diphosphate kinase B	NDKB_MOUSE
Q01853	Vcp	Transitional endoplasmic reticulum ATPase	TERA_MOUSE
Q02053	Uba1	Ubiquitin-like modifier-activating enzyme 1	UBA1_MOUSE
Q02105	C1qc	Complement C1q subcomponent subunit C	C1QC_MOUSE
Q02248	Ctnnb1	Catenin beta-1	CTNB1_MOUSE
Q02357-6	Ank1	Isoform 6 of Ankyrin-1	ANK1_MOUSE
Q02566	Myh6	Myosin-6	MYH6_MOUSE
Q02819	Nucb1	Nucleobindin-1	NUCB1_MOUSE
Q03137;Q03137-2	Epha4	Ephrin type-A receptor 4;Isoform Short of Ephrin type-A receptor 4	EPHA4_MOUSE
Q03141;Q03141-2;Q03141-3	Mark3	MAP/microtubule affinity-regulating kinase 3;Isoform 2 of MAP/microtubule affinity-regulating kinase 3;Isoform 3 of MAP/microtubule affinity-regulating kinase 3	MARK3_MOUSE
Q03173;Q03173-4;Q03173-5	Enah	Protein enabled homolog;Isoform 3 of Protein enabled homolog;Isoform 4 of Protein enabled homolog	ENAH_MOUSE
Q03265	Atp5f1a	ATP synthase subunit alpha, mitochondrial	ATPA_MOUSE
Q03391	Grin2d	Glutamate receptor ionotropic, NMDA 2D	NMDE4_MOUSE
Q03958	Pfdn6	Prefoldin subunit 6	PFD6_MOUSE
Q04447	Ckb	Creatine kinase B-type	KCRB_MOUSE
Q04690;Q04690-2	Nf1	Neurofibromin;Isoform 1 of Neurofibromin	NF1_MOUSE
Q04736	Yes1	Tyrosine-protein kinase Yes	YES_MOUSE
Q05186	Rcn1	Reticulocalbin-1	RCN1_MOUSE
Q05512;Q05512-2;Q05512-3;Q05512-4	Mark2	Serine/threonine-protein kinase MARK2;Isoform 2 of Serine/threonine-protein kinase MARK2;Isoform 3 of Serine/threonine-protein kinase MARK2;Isoform 4 of Serine/threonine-protein kinase MARK2	MARK2_MOUSE
Q05769	Ptgs2	Prostaglandin G/H synthase 2	PGH2_MOUSE
Q05793	Hspg2	Basement membrane-specific heparan sulfate proteoglycan core protein	PGBM_MOUSE
Q05915	Gch1	GTP cyclohydrolase 1	GCH1_MOUSE
Q05920	Pc	Pyruvate carboxylase, mitochondrial	PYC_MOUSE
Q06138	Cab39	Calcium-binding protein 39	CAB39_MOUSE
Q06185	Atp5me	ATP synthase subunit e, mitochondrial	ATP5I_MOUSE
Q06318	Scgb1a1	Uteroglobin	UTER_MOUSE
Q06890	Clu	Clusterin	CLUS_MOUSE
Q07076	Anxa7	Annexin A7	ANXA7_MOUSE
Q07113	Igf2r	Cation-independent mannose-6-phosphate receptor	MPRI_MOUSE
Q07797	Lgals3bp	Galectin-3-binding protein	LG3BP_MOUSE
Q08331	Calb2	Calretinin	CALB2_MOUSE
Q08460;Q08460-2;Q08460-3;Q08460-4;Q08460-5	Kcnma1	Calcium-activated potassium channel subunit alpha-1;Isoform 2 of Calcium-activated potassium channel subunit alpha-1;Isoform 3 of Calcium-activated potassium channel subunit alpha-1;Isoform 4 of Calcium-activated potassium channel subunit alpha-1;Isoform 5 of Calcium-activated potassium channel subunit alpha-1	KCMA1_MOUSE
Q08509	Eps8	Epidermal growth factor receptor kinase substrate 8	EPS8_MOUSE
Q0KL02;Q0KL02-3;Q0KL02-4	Trio	Triple functional domain protein;Isoform 3 of Triple functional domain protein;Isoform 4 of Triple functional domain protein	TRIO_MOUSE
Q0VBD0	Itgb8	Integrin beta-8	ITB8_MOUSE
Q0VBF8	Stum	Protein stum homolog	STUM_MOUSE
Q0VE82	Cpne7	Copine-7	CPNE7_MOUSE
Q11011	Npepps	Puromycin-sensitive aminopeptidase	PSA_MOUSE
Q11136	Pepd	Xaa-Pro dipeptidase	PEPD_MOUSE
Q148V7-2	Relch	Isoform 2 of RAB11-binding protein RELCH	RELCH_MOUSE
Q149F3	Gspt2	Eukaryotic peptide chain release factor GTP-binding subunit ERF3B	ERF3B_MOUSE
Q149L6	Dnajb14	DnaJ homolog subfamily B member 14	DJB14_MOUSE
Q14BI2	Grm2	Metabotropic glutamate receptor 2	GRM2_MOUSE
Q1LZI2	Slc35f3	Putative thiamine transporter SLC35F3	S35F3_MOUSE
Q2HXL6	Edem3	ER degradation-enhancing alpha-mannosidase-like protein 3	EDEM3_MOUSE
Q2M3X8;Q2M3X8-2;Q2M3X8-3;Q2M3X8-4;Q501J7;Q501J7-2;Q501J7-3	Phactr1;Phactr1;Phactr1;Phactr1;Phactr4;Phactr4;Phactr4	Phosphatase and actin regulator 1;Isoform 2 of Phosphatase and actin regulator 1;Isoform 3 of Phosphatase and actin regulator 1;Isoform 4 of Phosphatase and actin regulator 1;Phosphatase and actin regulator 4;Isoform 2 of Phosphatase and actin regulator 4;Isoform 3 of Phosphatase and actin regulator 4	PHAR1_MOUSE;PHAR1_MOUSE;PHAR1_MOUSE;PHAR1_MOUSE;PHAR4_MOUSE;PHAR4_MOUSE;PHAR4_MOUSE
Q2NL51	Gsk3a	Glycogen synthase kinase-3 alpha	GSK3A_MOUSE
Q2PFD7;Q2PFD7-2	Psd3	PH and SEC7 domain-containing protein 3;Isoform 2 of PH and SEC7 domain-containing protein 3	PSD3_MOUSE
Q2TBE6	Pi4k2a	Phosphatidylinositol 4-kinase type 2-alpha	P4K2A_MOUSE
Q2TPA8	Hsdl2	Hydroxysteroid dehydrogenase-like protein 2	HSDL2_MOUSE
Q32M02	Fscn2	Fascin-2	FSCN2_MOUSE
Q3B7Z2	Osbp	Oxysterol-binding protein 1	OSBP1_MOUSE
Q3KNM2	Marchf5	E3 ubiquitin-protein ligase MARCHF5	MARH5_MOUSE
Q3KQJ0	Tmem69	Transmembrane protein 69	TMM69_MOUSE
Q3TBT3;Q3TBT3-2;Q3TBT3-3	Sting1	Stimulator of interferon genes protein;Isoform 2 of Stimulator of interferon genes protein;Isoform 3 of Stimulator of interferon genes protein	STING_MOUSE
Q3TCJ1	Abraxas2	BRISC complex subunit Abraxas 2	ABRX2_MOUSE
Q3TDK6;Q3TDK6-2	Rogdi	Protein rogdi homolog;Isoform 2 of Protein rogdi homolog	ROGDI_MOUSE
Q3TDN2;Q3TDN2-2	Faf2	FAS-associated factor 2;Isoform 2 of FAS-associated factor 2	FAF2_MOUSE
Q3TDQ1	Stt3b	Dolichyl-diphosphooligosaccharide--protein glycosyltransferase subunit STT3B	STT3B_MOUSE
Q3TES0	Iqsec3	IQ motif and SEC7 domain-containing protein 3	IQEC3_MOUSE
Q3TFD2;Q3TFD2-2	Lpcat1	Lysophosphatidylcholine acyltransferase 1;Isoform 2 of Lysophosphatidylcholine acyltransferase 1	PCAT1_MOUSE
Q3THE2	Myl12b	Myosin regulatory light chain 12B	ML12B_MOUSE
Q3THG9	Aarsd1	Alanyl-tRNA editing protein Aarsd1	AASD1_MOUSE
Q3THK7	Gmps	GMP synthase [glutamine-hydrolyzing]	GUAA_MOUSE
Q3THS6	Mat2a	S-adenosylmethionine synthase isoform type-2	METK2_MOUSE
Q3TIV5;Q3TIV5-2	Zc3h15	Zinc finger CCCH domain-containing protein 15;Isoform 2 of Zinc finger CCCH domain-containing protein 15	ZC3HF_MOUSE
Q3TJZ6	Fam98a	Protein FAM98A	FA98A_MOUSE
Q3TLH4;Q3TLH4-5	Prrc2c	Protein PRRC2C;Isoform 5 of Protein PRRC2C	PRC2C_MOUSE
Q3TLI0	Trappc10	Trafficking protein particle complex subunit 10	TPC10_MOUSE
Q3TMH2	Scrn3	Secernin-3	SCRN3_MOUSE
Q3TMP8	Tmem38a	Trimeric intracellular cation channel type A	TM38A_MOUSE
Q3TVA9;Q3TVA9-2	Ccdc136	Coiled-coil domain-containing protein 136;Isoform 2 of Coiled-coil domain-containing protein 136	CC136_MOUSE
Q3TVI8	Pbxip1	Pre-B-cell leukemia transcription factor-interacting protein 1	PBIP1_MOUSE
Q3TXS7	Psmd1	26S proteasome non-ATPase regulatory subunit 1	PSMD1_MOUSE
Q3TXX4	Slc17a7	Vesicular glutamate transporter 1	VGLU1_MOUSE
Q3TY60-2	Fam131b	Isoform 2 of Protein FAM131B	F131B_MOUSE
Q3TYD4;Q3TYD4-2	Arsg	Arylsulfatase G;Isoform 2 of Arylsulfatase G	ARSG_MOUSE
Q3TYD6	Lmtk2	Serine/threonine-protein kinase LMTK2	LMTK2_MOUSE
Q3TYX3	Smyd5	SET and MYND domain-containing protein 5	SMYD5_MOUSE
Q3U0M1;Q3U0M1-2	Trappc9	Trafficking protein particle complex subunit 9;Isoform 2 of Trafficking protein particle complex subunit 9	TPPC9_MOUSE
Q3U0V1	Khsrp	Far upstream element-binding protein 2	FUBP2_MOUSE
Q3U1F9	Pag1	Phosphoprotein associated with glycosphingolipid-enriched microdomains 1	PHAG1_MOUSE
Q3U1J4	Ddb1	DNA damage-binding protein 1	DDB1_MOUSE
Q3U2P1	Sec24a	Protein transport protein Sec24A	SC24A_MOUSE
Q3U308	Ctu2	Cytoplasmic tRNA 2-thiolation protein 2	CTU2_MOUSE
Q3U3R4;Q3U3R4-2	Lmf1	Lipase maturation factor 1;Isoform 2 of Lipase maturation factor 1	LMF1_MOUSE
Q3U7R1;Q3U7R1-2	Esyt1	Extended synaptotagmin-1;Isoform 2 of Extended synaptotagmin-1	ESYT1_MOUSE
Q3UDP0	Wdr41	WD repeat-containing protein 41	WDR41_MOUSE
Q3UEZ8	Slc10a4	Sodium/bile acid cotransporter 4	NTCP4_MOUSE
Q3UFQ8	Carmil3	Capping protein, Arp2/3 and myosin-I linker protein 3	CARL3_MOUSE
Q3UFT3	Garem1	GRB2-associated and regulator of MAPK protein	GARE1_MOUSE
Q3UGC7	Eif3j1	Eukaryotic translation initiation factor 3 subunit J-A	EI3JA_MOUSE
Q3UGP8	Alg10b	Putative Dol-P-Glc:Glc(2)Man(9)GlcNAc(2)-PP-Dol alpha-1,2-glucosyltransferase	AG10B_MOUSE
Q3UGR5	Hdhd2	Haloacid dehalogenase-like hydrolase domain-containing protein 2	HDHD2_MOUSE
Q3UGY8	Arfgef3	Brefeldin A-inhibited guanine nucleotide-exchange protein 3	BIG3_MOUSE
Q3UH60	Dip2b	Disco-interacting protein 2 homolog B	DIP2B_MOUSE
Q3UH66-3;Q3UH66-4;Q3UH66-5;Q3UH66-6;Q3UH66-7	Wnk2	Isoform 3 of Serine/threonine-protein kinase WNK2;Isoform 4 of Serine/threonine-protein kinase WNK2;Isoform 5 of Serine/threonine-protein kinase WNK2;Isoform 6 of Serine/threonine-protein kinase WNK2;Isoform 7 of Serine/threonine-protein kinase WNK2	WNK2_MOUSE
Q3UHB8	Ccdc177	Coiled-coil domain-containing protein 177	CC177_MOUSE
Q3UHC7;Q3UHC7-2;Q3UHC7-3;Q3UHC7-4	Dab2ip	Disabled homolog 2-interacting protein;Isoform 2 of Disabled homolog 2-interacting protein;Isoform 3 of Disabled homolog 2-interacting protein;Isoform 4 of Disabled homolog 2-interacting protein	DAB2P_MOUSE
Q3UHD2	Gfod1	Glucose-fructose oxidoreductase domain-containing protein 1	GFOD1_MOUSE
Q3UHD6;Q3UHD6-2	Snx27	Sorting nexin-27;Isoform 2 of Sorting nexin-27	SNX27_MOUSE
Q3UHD9;Q3UHD9-2	Agap2	Arf-GAP with GTPase, ANK repeat and PH domain-containing protein 2;Isoform 2 of Arf-GAP with GTPase, ANK repeat and PH domain-containing protein 2	AGAP2_MOUSE
Q3UHH2	Slc22a23	Solute carrier family 22 member 23	S22AN_MOUSE
Q3UHI4	Tmed8	Protein TMED8	TMED8_MOUSE
Q3UHJ0	Aak1	AP2-associated protein kinase 1	AAK1_MOUSE
Q3UHK1	Slc2a13	Proton myo-inositol cotransporter	MYCT_MOUSE
Q3UHL1	Camkv	CaM kinase-like vesicle-associated protein	CAMKV_MOUSE
Q3UHX2	Pdap1	28 kDa heat- and acid-stable phosphoprotein	HAP28_MOUSE
Q3UIU2	Ndufb6	NADH dehydrogenase [ubiquinone] 1 beta subcomplex subunit 6	NDUB6_MOUSE
Q3UJ81	Cnep1r1	Nuclear envelope phosphatase-regulatory subunit 1	NEPR1_MOUSE
Q3UJD6;Q3UJD6-2	Usp19	Ubiquitin carboxyl-terminal hydrolase 19;Isoform 2 of Ubiquitin carboxyl-terminal hydrolase 19	UBP19_MOUSE
Q3UJP5	Unknown	Protein C8orf37 homolog	CH037_MOUSE
Q3UJU9	Rmdn3	Regulator of microtubule dynamics protein 3	RMD3_MOUSE
Q3UKC1	Tax1bp1	Tax1-binding protein 1 homolog	TAXB1_MOUSE
Q3ULJ0;Q3ULJ0-2	Gpd1l	Glycerol-3-phosphate dehydrogenase 1-like protein;Isoform 2 of Glycerol-3-phosphate dehydrogenase 1-like protein	GPD1L_MOUSE
Q3UM45	Ppp1r7	Protein phosphatase 1 regulatory subunit 7	PP1R7_MOUSE
Q3UMB5	Smcr8	Guanine nucleotide exchange protein SMCR8	SMCR8_MOUSE
Q3UMR5	Mcu	Calcium uniporter protein, mitochondrial	MCU_MOUSE
Q3UMT1	Ppp1r12c	Protein phosphatase 1 regulatory subunit 12C	PP12C_MOUSE
Q3UN02	Lclat1	Lysocardiolipin acyltransferase 1	LCLT1_MOUSE
Q3UNH4	Gprin1	G protein-regulated inducer of neurite outgrowth 1	GRIN1_MOUSE
Q3UNZ8	Cryzl2	Quinone oxidoreductase-like protein 2	QORL2_MOUSE
Q3UPH1	Prrc1	Protein PRRC1	PRRC1_MOUSE
Q3UPL0	Sec31a	Protein transport protein Sec31A	SC31A_MOUSE
Q3UQ44	Iqgap2	Ras GTPase-activating-like protein IQGAP2	IQGA2_MOUSE
Q3UR32	P2rx3	P2X purinoceptor 3	P2RX3_MOUSE
Q3USB7	Plcl1	Inactive phospholipase C-like protein 1	PLCL1_MOUSE
Q3UTH8;Q3UTH8-2;Q3UTH8-3;Q3UTH8-4	Arhgef9	Rho guanine nucleotide exchange factor 9;Isoform 2 of Rho guanine nucleotide exchange factor 9;Isoform 3 of Rho guanine nucleotide exchange factor 9;Isoform 4 of Rho guanine nucleotide exchange factor 9	ARHG9_MOUSE
Q3UTZ3	MAP11	Microtubule-associated protein 11	MA11_MOUSE
Q3UU96;Q3UU96-2	Cdc42bpa	Serine/threonine-protein kinase MRCK alpha;Isoform 2 of Serine/threonine-protein kinase MRCK alpha	MRCKA_MOUSE
Q3UUF8	Ankrd34b	Ankyrin repeat domain-containing protein 34B	AN34B_MOUSE
Q3UUG6;Q3UUG6-2	Tbc1d24	TBC1 domain family member 24;Isoform 2 of TBC1 domain family member 24	TBC24_MOUSE
Q3UUQ7	Pgap1	GPI inositol-deacylase	PGAP1_MOUSE
Q3UVL4	Vps51	Vacuolar protein sorting-associated protein 51 homolog	VPS51_MOUSE
Q3UVX5	Grm5	Metabotropic glutamate receptor 5	GRM5_MOUSE
Q3UWA6;Q3UWA6-2	Gucy2c	Heat-stable enterotoxin receptor;Isoform 2 of Heat-stable enterotoxin receptor	GUC2C_MOUSE
Q3UX10	Tubal3	Tubulin alpha chain-like 3	TBAL3_MOUSE
Q3UYC0	Ppm1h	Protein phosphatase 1H	PPM1H_MOUSE
Q3UYG8	Macrod2	ADP-ribose glycohydrolase MACROD2	MACD2_MOUSE
Q3UYH7	Adrbk2	Beta-adrenergic receptor kinase 2	ARBK2_MOUSE
Q3V038	Ttc9	Tetratricopeptide repeat protein 9A	TTC9A_MOUSE
Q3V1L4	Nt5c2	Cytosolic purine 5'-nucleotidase	5NTC_MOUSE
Q3V1U8	Elmod1	ELMO domain-containing protein 1	ELMD1_MOUSE
Q3V300	Kif22	Kinesin-like protein KIF22	KIF22_MOUSE
Q3V3Q7	Pacs2	Phosphofurin acidic cluster sorting protein 2	PACS2_MOUSE
Q3V3V9-2	Carmil2	Isoform 2 of Capping protein, Arp2/3 and myosin-I linker protein 2	CARL2_MOUSE
Q4ACU6;Q4ACU6-11;Q4ACU6-3;Q4ACU6-7	Shank3	SH3 and multiple ankyrin repeat domains protein 3;Isoform 3 of SH3 and multiple ankyrin repeat domains protein 3;Isoform 4 of SH3 and multiple ankyrin repeat domains protein 3;Isoform 6 of SH3 and multiple ankyrin repeat domains protein 3	SHAN3_MOUSE
Q4FZG7;Q9WVA2	Timm8a2;Timm8a1	Putative mitochondrial import inner membrane translocase subunit Tim8 A-B;Mitochondrial import inner membrane translocase subunit Tim8 A	TI8AB_MOUSE;TIM8A_MOUSE
Q4JIM5	Abl2	Tyrosine-protein kinase ABL2	ABL2_MOUSE
Q4KMM3;Q4KMM3-2;Q4KMM3-3;Q4KMM3-4	Oxr1	Oxidation resistance protein 1;Isoform 2 of Oxidation resistance protein 1;Isoform 3 of Oxidation resistance protein 1;Isoform 4 of Oxidation resistance protein 1	OXR1_MOUSE
Q4KUS2	Unc13a	Protein unc-13 homolog A	UN13A_MOUSE
Q4QQM4	Trp53i11	Tumor protein p53-inducible protein 11	P5I11_MOUSE
Q4V9Z5-2;Q4V9Z5-3	Sez6l2	Isoform 2 of Seizure 6-like protein 2;Isoform 3 of Seizure 6-like protein 2	SE6L2_MOUSE
Q4VAA2;Q4VAA2-2	Cdv3	Protein CDV3;Isoform 2 of Protein CDV3	CDV3_MOUSE
Q4VAE3	Tmem65	Transmembrane protein 65	TMM65_MOUSE
Q501J6	Ddx17	Probable ATP-dependent RNA helicase DDX17	DDX17_MOUSE
Q505B7	Zbtb8os	Protein archease	ARCH_MOUSE
Q505F5	Lrrc47	Leucine-rich repeat-containing protein 47	LRC47_MOUSE
Q50L41	Pla2g4f	Cytosolic phospholipase A2 zeta	PA24F_MOUSE
Q52KF3;Q52KF3-2;Q52KF3-3	Spire1	Protein spire homolog 1;Isoform 2 of Protein spire homolog 1;Isoform 3 of Protein spire homolog 1	SPIR1_MOUSE
Q52KI8;Q52KI8-2	Srrm1	Serine/arginine repetitive matrix protein 1;Isoform 2 of Serine/arginine repetitive matrix protein 1	SRRM1_MOUSE
Q52KR3	Prune2	Protein prune homolog 2	PRUN2_MOUSE
Q56A07	Scn2b	Sodium channel subunit beta-2	SCN2B_MOUSE
Q571K4	Tab3	TGF-beta-activated kinase 1 and MAP3K7-binding protein 3	TAB3_MOUSE
Q58A65;Q58A65-2	Spag9	C-Jun-amino-terminal kinase-interacting protein 4;Isoform 2 of C-Jun-amino-terminal kinase-interacting protein 4	JIP4_MOUSE
Q5DQR4;Q5DQR4-2;Q5DQR4-3;Q5DQR4-4;Q5DQR4-5;Q5DQR4-6	Stxbp5l	Syntaxin-binding protein 5-like;Isoform 2 of Syntaxin-binding protein 5-like;Isoform 3 of Syntaxin-binding protein 5-like;Isoform 4 of Syntaxin-binding protein 5-like;Isoform 5 of Syntaxin-binding protein 5-like;Isoform 6 of Syntaxin-binding protein 5-like	STB5L_MOUSE
Q5DTL9;Q5DTL9-2;Q5DTL9-3;Q5DTL9-4	Slc4a10	Sodium-driven chloride bicarbonate exchanger;Isoform 2 of Sodium-driven chloride bicarbonate exchanger;Isoform 3 of Sodium-driven chloride bicarbonate exchanger;Isoform 4 of Sodium-driven chloride bicarbonate exchanger	S4A10_MOUSE
Q5EBG8	Unknown	Uncharacterized protein C1orf50 homolog	CA050_MOUSE
Q5EBJ4	Ermn	Ermin	ERMIN_MOUSE
Q5EG47	Prkaa1	5'-AMP-activated protein kinase catalytic subunit alpha-1	AAPK1_MOUSE
Q5F285	Tmem256	Transmembrane protein 256	TM256_MOUSE
Q5F2E8	Taok1	Serine/threonine-protein kinase TAO1	TAOK1_MOUSE
Q5FWK3	Arhgap1	Rho GTPase-activating protein 1	RHG01_MOUSE
Q5GH67	Xkr4	XK-related protein 4	XKR4_MOUSE
Q5HZI9	Slc25a51	Solute carrier family 25 member 51	S2551_MOUSE
Q5KU39	Vps41	Vacuolar protein sorting-associated protein 41 homolog	VPS41_MOUSE
Q5M8N0	Cnrip1	CB1 cannabinoid receptor-interacting protein 1	CNRP1_MOUSE
Q5PR73	Diras2	GTP-binding protein Di-Ras2	DIRA2_MOUSE
Q5RJG7	Crppa	D-ribitol-5-phosphate cytidylyltransferase	ISPD_MOUSE
Q5RJI5	Brsk1	Serine/threonine-protein kinase BRSK1	BRSK1_MOUSE
Q5SP85;Q5SP85-2	Ccdc85a	Coiled-coil domain-containing protein 85A;Isoform 2 of Coiled-coil domain-containing protein 85A	CC85A_MOUSE
Q5SQX6	Cyfip2	Cytoplasmic FMR1-interacting protein 2	CYFP2_MOUSE
Q5SRX1;Q5SRX1-2	Tom1l2	TOM1-like protein 2;Isoform 2 of TOM1-like protein 2	TM1L2_MOUSE
Q5SSH8	Cyb5d2	Neuferricin	NEUFC_MOUSE
Q5SSL4	Abr	Active breakpoint cluster region-related protein	ABR_MOUSE
Q5SSM3;Q5SSM3-2;Q5SSM3-3	Arhgap44	Rho GTPase-activating protein 44;Isoform 2 of Rho GTPase-activating protein 44;Isoform 3 of Rho GTPase-activating protein 44	RHG44_MOUSE
Q5SV85;Q5SV85-2	Synrg	Synergin gamma;Isoform 2 of Synergin gamma	SYNRG_MOUSE
Q5SVL6	Rap1gap2	Rap1 GTPase-activating protein 2	RPGP2_MOUSE
Q5SWP3	Nacad	NAC-alpha domain-containing protein 1	NACAD_MOUSE
Q5SWU9	Acaca	Acetyl-CoA carboxylase 1	ACACA_MOUSE
Q5SWU9-2	Acaca	Isoform 2 of Acetyl-CoA carboxylase 1	ACACA_MOUSE
Q5SXY1;Q5SXY1-2;Q5SXY1-3	Specc1	Cytospin-B;Isoform 2 of Cytospin-B;Isoform 4 of Cytospin-B	CYTSB_MOUSE
Q5U3K5	Rabl6	Rab-like protein 6	RABL6_MOUSE
Q5U405	Tmprss13	Transmembrane protease serine 13	TMPSD_MOUSE
Q5U419	Mfsd3	Major facilitator superfamily domain-containing protein 3	MFSD3_MOUSE
Q5U680	Slc25a26	S-adenosylmethionine mitochondrial carrier protein	SAMC_MOUSE
Q5XG69	Fam169a	Soluble lamin-associated protein of 75 kDa	F169A_MOUSE
Q5XJV6	Lmtk3	Serine/threonine-protein kinase LMTK3	LMTK3_MOUSE
Q5XKN4	Jagn1	Protein jagunal homolog 1	JAGN1_MOUSE
Q60597;Q60597-2;Q60597-3;Q60597-4	Ogdh	2-oxoglutarate dehydrogenase, mitochondrial;Isoform 2 of 2-oxoglutarate dehydrogenase, mitochondrial;Isoform 3 of 2-oxoglutarate dehydrogenase, mitochondrial;Isoform 4 of 2-oxoglutarate dehydrogenase, mitochondrial	ODO1_MOUSE
Q60598	Cttn	Src substrate cortactin	SRC8_MOUSE
Q60605;Q60605-2	Myl6	Myosin light polypeptide 6;Isoform Smooth muscle of Myosin light polypeptide 6	MYL6_MOUSE
Q60613	Adora2a	Adenosine receptor A2a	AA2AR_MOUSE
Q60625	Icam5	Intercellular adhesion molecule 5	ICAM5_MOUSE
Q60631	Grb2	Growth factor receptor-bound protein 2	GRB2_MOUSE
Q60634;Q60634-2;Q60634-3	Flot2	Flotillin-2;Isoform 2 of Flotillin-2;Isoform 3 of Flotillin-2	FLOT2_MOUSE
Q60668;Q60668-3	Hnrnpd	Heterogeneous nuclear ribonucleoprotein D0;Isoform 3 of Heterogeneous nuclear ribonucleoprotein D0	HNRPD_MOUSE
Q60673	Ptprn	Receptor-type tyrosine-protein phosphatase-like N	PTPRN_MOUSE
Q60676	Ppp5c	Serine/threonine-protein phosphatase 5	PPP5_MOUSE
Q60692	Psmb6	Proteasome subunit beta type-6	PSB6_MOUSE
Q60715;Q60715-2	P4ha1	Prolyl 4-hydroxylase subunit alpha-1;Isoform 2 of Prolyl 4-hydroxylase subunit alpha-1	P4HA1_MOUSE
Q60737	Csnk2a1	Casein kinase II subunit alpha	CSK21_MOUSE
Q60749	Khdrbs1	KH domain-containing, RNA-binding, signal transduction-associated protein 1	KHDR1_MOUSE
Q60766;Q60766-2	Irgm1	Immunity-related GTPase family M protein 1;Isoform 2 of Immunity-related GTPase family M protein 1	IRGM1_MOUSE
Q60771	Cldn11	Claudin-11	CLD11_MOUSE
Q60790	Rasa3	Ras GTPase-activating protein 3	RASA3_MOUSE
Q60803	Traf3	TNF receptor-associated factor 3	TRAF3_MOUSE
Q60829	Ppp1r1b	Protein phosphatase 1 regulatory subunit 1B	PPR1B_MOUSE
Q60838	Dvl2	Segment polarity protein dishevelled homolog DVL-2	DVL2_MOUSE
Q60854	Serpinb6	Serpin B6	SPB6_MOUSE
Q60864	Stip1	Stress-induced-phosphoprotein 1	STIP1_MOUSE
Q60865	Caprin1	Caprin-1	CAPR1_MOUSE
Q60870	Reep5	Receptor expression-enhancing protein 5	REEP5_MOUSE
Q60899	Elavl2	ELAV-like protein 2	ELAV2_MOUSE
Q60900;Q60900-2	Elavl3	ELAV-like protein 3;Isoform HuC-S of ELAV-like protein 3	ELAV3_MOUSE
Q60902	Eps15l1	Epidermal growth factor receptor substrate 15-like 1	EP15R_MOUSE
Q60930	Vdac2	Voltage-dependent anion-selective channel protein 2	VDAC2_MOUSE
Q60931	Vdac3	Voltage-dependent anion-selective channel protein 3	VDAC3_MOUSE
Q60932-2	Vdac1	Isoform Mt-VDAC1 of Voltage-dependent anion-selective channel protein 1	VDAC1_MOUSE
Q60960	Kpna1	Importin subunit alpha-5	IMA5_MOUSE
Q60996;Q60996-2;Q60996-3;Q60996-4	Ppp2r5c	Serine/threonine-protein phosphatase 2A 56 kDa regulatory subunit gamma isoform;Isoform 1 of Serine/threonine-protein phosphatase 2A 56 kDa regulatory subunit gamma isoform;Isoform 3 of Serine/threonine-protein phosphatase 2A 56 kDa regulatory subunit gamma isoform;Isoform 4 of Serine/threonine-protein phosphatase 2A 56 kDa regulatory subunit gamma isoform	2A5G_MOUSE
Q60997;Q60997-2;Q60997-3;Q60997-4	Dmbt1	Deleted in malignant brain tumors 1 protein;Isoform 2 of Deleted in malignant brain tumors 1 protein;Isoform 3 of Deleted in malignant brain tumors 1 protein;Isoform 4 of Deleted in malignant brain tumors 1 protein	DMBT1_MOUSE
Q61016	Gng7	Guanine nucleotide-binding protein G(I)/G(S)/G(O) subunit gamma-7	GBG7_MOUSE
Q61024	Asns	Asparagine synthetase [glutamine-hydrolyzing]	ASNS_MOUSE
Q61029;Q61029-2;Q61029-3;Q61029-4;Q61033;Q61033-2	Tmpo	Lamina-associated polypeptide 2, isoforms beta/delta/epsilon/gamma;Isoform Delta of Lamina-associated polypeptide 2, isoforms beta/delta/epsilon/gamma;Isoform Epsilon of Lamina-associated polypeptide 2, isoforms beta/delta/epsilon/gamma;Isoform Gamma of Lamina-associated polypeptide 2, isoforms beta/delta/epsilon/gamma;Lamina-associated polypeptide 2, isoforms alpha/zeta;Isoform Zeta of Lamina-as…	LAP2B_MOUSE;LAP2B_MOUSE;LAP2B_MOUSE;LAP2B_MOUSE;LAP2A_MOUSE;LAP2A_MOUSE
Q61035	Hars1	Histidine--tRNA ligase, cytoplasmic	HARS1_MOUSE
Q61036;Q61036-2	Pak3	Serine/threonine-protein kinase PAK 3;Isoform 2 of Serine/threonine-protein kinase PAK 3	PAK3_MOUSE
Q61037;Q61037-2;Q61037-3;Q61037-4;Q61037-5;Q61037-6	Tsc2	Tuberin;Isoform A of Tuberin;Isoform B of Tuberin;Isoform C of Tuberin;Isoform D of Tuberin;Isoform E of Tuberin	TSC2_MOUSE
Q61081	Cdc37	Hsp90 co-chaperone Cdc37	CDC37_MOUSE
Q61102	Abcb7	ATP-binding cassette sub-family B member 7, mitochondrial	ABCB7_MOUSE
Q61137;Q61137-2	Astn1	Astrotactin-1;Isoform 2 of Astrotactin-1	ASTN1_MOUSE
Q61140	Bcar1	Breast cancer anti-estrogen resistance protein 1	BCAR1_MOUSE
Q61143	Trpc6	Short transient receptor potential channel 6	TRPC6_MOUSE
Q61151	Ppp2r5e	Serine/threonine-protein phosphatase 2A 56 kDa regulatory subunit epsilon isoform	2A5E_MOUSE
Q61165	Slc9a1	Sodium/hydrogen exchanger 1	SL9A1_MOUSE
Q61166	Mapre1	Microtubule-associated protein RP/EB family member 1	MARE1_MOUSE
Q61171	Prdx2	Peroxiredoxin-2	PRDX2_MOUSE
Q61176	Arg1	Arginase-1	ARGI1_MOUSE
Q61187	Tsg101	Tumor susceptibility gene 101 protein	TS101_MOUSE
Q61189	Clns1a	Methylosome subunit pICln	ICLN_MOUSE
Q61191	Hcfc1	Host cell factor 1	HCFC1_MOUSE
Q61205	Pafah1b3	Platelet-activating factor acetylhydrolase IB subunit gamma	PA1B3_MOUSE
Q61206	Pafah1b2	Platelet-activating factor acetylhydrolase IB subunit beta	PA1B2_MOUSE
Q61207	Psap	Prosaposin	SAP_MOUSE
Q61214;Q9Z188;Q9Z188-2;Q9Z188-3	Dyrk1a;Dyrk1b;Dyrk1b;Dyrk1b	Dual specificity tyrosine-phosphorylation-regulated kinase 1A;Dual specificity tyrosine-phosphorylation-regulated kinase 1B;Isoform 2 of Dual specificity tyrosine-phosphorylation-regulated kinase 1B;Isoform 3 of Dual specificity tyrosine-phosphorylation-regulated kinase 1B	DYR1A_MOUSE;DYR1B_MOUSE;DYR1B_MOUSE;DYR1B_MOUSE
Q61233	Lcp1	Plastin-2	PLSL_MOUSE
Q61249	Igbp1	Immunoglobulin-binding protein 1	IGBP1_MOUSE
Q61282	Acan	Aggrecan core protein	PGCA_MOUSE
Q61290	Cacna1e	Voltage-dependent R-type calcium channel subunit alpha-1E	CAC1E_MOUSE
Q61301;Q61301-2	Ctnna2	Catenin alpha-2;Isoform 2 of Catenin alpha-2	CTNA2_MOUSE
Q61315	Apc	Adenomatous polyposis coli protein	APC_MOUSE
Q61316	Hspa4	Heat shock 70 kDa protein 4	HSP74_MOUSE
Q61327	Slc6a3	Sodium-dependent dopamine transporter	SC6A3_MOUSE
Q61330	Cntn2	Contactin-2	CNTN2_MOUSE
Q61335	Bcap31	B-cell receptor-associated protein 31	BAP31_MOUSE
Q61337	Bad	Bcl2-associated agonist of cell death	BAD_MOUSE
Q61361	Bcan	Brevican core protein	PGCB_MOUSE
Q61411	Hras	GTPase HRas	RASH_MOUSE
Q61420	Slc35a1	CMP-sialic acid transporter	S35A1_MOUSE
Q61423	Kcna4	Potassium voltage-gated channel subfamily A member 4	KCNA4_MOUSE
Q61425	Hadh	Hydroxyacyl-coenzyme A dehydrogenase, mitochondrial	HCDH_MOUSE
Q61481;Q61481-2	Pde1a	Calcium/calmodulin-dependent 3',5'-cyclic nucleotide phosphodiesterase 1A;Isoform 4 of Calcium/calmodulin-dependent 3',5'-cyclic nucleotide phosphodiesterase 1A	PDE1A_MOUSE
Q61490	Alcam	CD166 antigen	CD166_MOUSE
Q61508;Q61508-2	Ecm1	Extracellular matrix protein 1;Isoform Short of Extracellular matrix protein 1	ECM1_MOUSE
Q61527;Q61527-2;Q61527-3	Erbb4	Receptor tyrosine-protein kinase erbB-4;Isoform JM-B CYT-2 of Receptor tyrosine-protein kinase erbB-4;Isoform JM-A CYT-2 of Receptor tyrosine-protein kinase erbB-4	ERBB4_MOUSE
Q61545	Ewsr1	RNA-binding protein EWS	EWS_MOUSE
Q61548;Q61548-2;Q61548-3	Snap91	Clathrin coat assembly protein AP180;Isoform Short of Clathrin coat assembly protein AP180;Isoform 3 of Clathrin coat assembly protein AP180	AP180_MOUSE
Q61553	Fscn1	Fascin	FSCN1_MOUSE
Q61576	Fkbp10	Peptidyl-prolyl cis-trans isomerase FKBP10	FKB10_MOUSE
Q61584;Q61584-2;Q61584-3;Q61584-4;Q61584-5;Q61584-6	Fxr1	Fragile X mental retardation syndrome-related protein 1;Isoform A of Fragile X mental retardation syndrome-related protein 1;Isoform B of Fragile X mental retardation syndrome-related protein 1;Isoform C of Fragile X mental retardation syndrome-related protein 1;Isoform D of Fragile X mental retardation syndrome-related protein 1;Isoform F of Fragile X mental retardation syndrome-related protein 1	FXR1_MOUSE
Q61598	Gdi2	Rab GDP dissociation inhibitor beta	GDIB_MOUSE
Q61599	Arhgdib	Rho GDP-dissociation inhibitor 2	GDIR2_MOUSE
Q61644	Pacsin1	Protein kinase C and casein kinase substrate in neurons protein 1	PACN1_MOUSE
Q61656	Ddx5	Probable ATP-dependent RNA helicase DDX5	DDX5_MOUSE
Q61699	Hsph1	Heat shock protein 105 kDa	HS105_MOUSE
Q61701;Q61701-10;Q61701-11;Q61701-4;Q61701-5;Q61701-7;Q61701-9	Elavl4	ELAV-like protein 4;Isoform 9 of ELAV-like protein 4;Isoform 10 of ELAV-like protein 4;Isoform 3 of ELAV-like protein 4;Isoform 4 of ELAV-like protein 4;Isoform 6 of ELAV-like protein 4;Isoform 8 of ELAV-like protein 4	ELAV4_MOUSE
Q61704	Itih3	Inter-alpha-trypsin inhibitor heavy chain H3	ITIH3_MOUSE
Q61735	Cd47	Leukocyte surface antigen CD47	CD47_MOUSE
Q61753	Phgdh	D-3-phosphoglycerate dehydrogenase	SERA_MOUSE
Q61768	Kif5b	Kinesin-1 heavy chain	KINH_MOUSE
Q61792	Lasp1	LIM and SH3 domain protein 1	LASP1_MOUSE
Q61831;Q61831-2	Mapk10	Mitogen-activated protein kinase 10;Isoform Alpha-1 of Mitogen-activated protein kinase 10	MK10_MOUSE
Q61879	Myh10	Myosin-10	MYH10_MOUSE
Q61885	Mog	Myelin-oligodendrocyte glycoprotein	MOG_MOUSE
Q61923	Kcna6	Potassium voltage-gated channel subfamily A member 6	KCNA6_MOUSE
Q61937	Npm1	Nucleophosmin	NPM_MOUSE
Q61990;Q61990-2	Pcbp2	Poly(rC)-binding protein 2;Isoform 2 of Poly(rC)-binding protein 2	PCBP2_MOUSE
Q62048	Pea15	Astrocytic phosphoprotein PEA-15	PEA15_MOUSE
Q62059;Q62059-3	Vcan	Versican core protein;Isoform V2 of Versican core protein	CSPG2_MOUSE
Q62077	Plcg1	1-phosphatidylinositol 4,5-bisphosphate phosphodiesterase gamma-1	PLCG1_MOUSE
Q62083	Pick1	PRKCA-binding protein	PICK1_MOUSE
Q62086	Pon2	Serum paraoxonase/arylesterase 2	PON2_MOUSE
Q62087	Pon3	Serum paraoxonase/lactonase 3	PON3_MOUSE
Q62093	Srsf2	Serine/arginine-rich splicing factor 2	SRSF2_MOUSE
Q62108;Q62108-2;Q62108-3	Dlg4	Disks large homolog 4;Isoform 2 of Disks large homolog 4;Isoform 3 of Disks large homolog 4	DLG4_MOUSE
Q62151;Q62151-10;Q62151-2;Q62151-3;Q62151-4;Q62151-5	Ager	Advanced glycosylation end product-specific receptor;Isoform 10 of Advanced glycosylation end product-specific receptor;Isoform 2 of Advanced glycosylation end product-specific receptor;Isoform 3 of Advanced glycosylation end product-specific receptor;Isoform 4 of Advanced glycosylation end product-specific receptor;Isoform 5 of Advanced glycosylation end product-specific receptor	RAGE_MOUSE
Q62167	Ddx3x	ATP-dependent RNA helicase DDX3X	DDX3X_MOUSE
Q62172	Ralbp1	RalA-binding protein 1	RBP1_MOUSE
Q62186	Ssr4	Translocon-associated protein subunit delta	SSRD_MOUSE
Q62188	Dpysl3	Dihydropyrimidinase-related protein 3	DPYL3_MOUSE
Q62226	Shh	Sonic hedgehog protein	SHH_MOUSE
Q62261	Sptbn1	Spectrin beta chain, non-erythrocytic 1	SPTB2_MOUSE
Q62277	Syp	Synaptophysin	SYPH_MOUSE
Q62283	Tspan7	Tetraspanin-7	TSN7_MOUSE
Q62318	Trim28	Transcription intermediary factor 1-beta	TIF1B_MOUSE
Q62348	Tsn	Translin	TSN_MOUSE
Q62351	Tfrc	Transferrin receptor protein 1	TFR1_MOUSE
Q62376;Q62376-2	Snrnp70	U1 small nuclear ribonucleoprotein 70 kDa;Isoform 2 of U1 small nuclear ribonucleoprotein 70 kDa	RU17_MOUSE
Q62393;Q62393-2;Q62393-3	Tpd52	Tumor protein D52;Isoform 2 of Tumor protein D52;Isoform 3 of Tumor protein D52	TPD52_MOUSE
Q62415	Ppp1r13b	Apoptosis-stimulating of p53 protein 1	ASPP1_MOUSE
Q62417;Q62417-2	Sorbs1	Sorbin and SH3 domain-containing protein 1;Isoform 2 of Sorbin and SH3 domain-containing protein 1	SRBS1_MOUSE
Q62418;Q62418-2;Q62418-3	Dbnl	Drebrin-like protein;Isoform 2 of Drebrin-like protein;Isoform 3 of Drebrin-like protein	DBNL_MOUSE
Q62419	Sh3gl1	Endophilin-A2	SH3G1_MOUSE
Q62420	Sh3gl2	Endophilin-A1	SH3G2_MOUSE
Q62425	Ndufa4	Cytochrome c oxidase subunit NDUFA4	NDUA4_MOUSE
Q62426	Cstb	Cystatin-B	CYTB_MOUSE
Q62432;Q62432-2	Smad2	Mothers against decapentaplegic homolog 2;Isoform Short of Mothers against decapentaplegic homolog 2	SMAD2_MOUSE
Q62442;Q62442-2	Vamp1	Vesicle-associated membrane protein 1;Isoform 2 of Vesicle-associated membrane protein 1	VAMP1_MOUSE
Q62465	Vat1	Synaptic vesicle membrane protein VAT-1 homolog	VAT1_MOUSE
Q62470;Q62470-2;Q62470-3	Itga3	Integrin alpha-3;Isoform 2 of Integrin alpha-3;Isoform 3 of Integrin alpha-3	ITA3_MOUSE
Q62523	Zyx	Zyxin	ZYX_MOUSE
Q63810;Q63810-2	Ppp3r1	Calcineurin subunit B type 1;Isoform 2 of Calcineurin subunit B type 1	CANB1_MOUSE
Q63844	Mapk3	Mitogen-activated protein kinase 3	MK03_MOUSE
Q63912	Omg	Oligodendrocyte-myelin glycoprotein	OMGP_MOUSE
Q64010	Crk	Adapter molecule crk	CRK_MOUSE
Q640M6	Gdpd5	Glycerophosphodiester phosphodiesterase domain-containing protein 5	GDPD5_MOUSE
Q640N2	Arl13b	ADP-ribosylation factor-like protein 13B	AR13B_MOUSE
Q640R3	Hepacam	Hepatocyte cell adhesion molecule	HECAM_MOUSE
Q64105	Spr	Sepiapterin reductase	SPRE_MOUSE
Q64133	Maoa	Amine oxidase [flavin-containing] A	AOFA_MOUSE
Q64191	Aga	N(4)-(beta-N-acetylglucosaminyl)-L-asparaginase	ASPG_MOUSE
Q641K1;Q641K1-2;Q641K1-3;Q641K1-4;Q641K1-5	Agtpbp1	Cytosolic carboxypeptidase 1;Isoform 2 of Cytosolic carboxypeptidase 1;Isoform 3 of Cytosolic carboxypeptidase 1;Isoform 4 of Cytosolic carboxypeptidase 1;Isoform 5 of Cytosolic carboxypeptidase 1	CBPC1_MOUSE
Q64310	Surf4	Surfeit locus protein 4	SURF4_MOUSE
Q64327	Mea1	Male-enhanced antigen 1	MEA1_MOUSE
Q64332	Syn2	Synapsin-2	SYN2_MOUSE
Q64337;Q64337-2	Sqstm1	Sequestosome-1;Isoform 2 of Sequestosome-1	SQSTM_MOUSE
Q64378	Fkbp5	Peptidyl-prolyl cis-trans isomerase FKBP5	FKBP5_MOUSE
Q64433	Hspe1	10 kDa heat shock protein, mitochondrial	CH10_MOUSE
Q64487;Q64487-1;Q64487-10;Q64487-11;Q64487-12;Q64487-2;Q64487-3;Q64487-5;Q64487-6;Q64487-7;Q64487-8;Q64487-9	Ptprd	Receptor-type tyrosine-protein phosphatase delta;Isoform C of Receptor-type tyrosine-protein phosphatase delta;Isoform J of Receptor-type tyrosine-protein phosphatase delta;Isoform K of Receptor-type tyrosine-protein phosphatase delta;Isoform L of Receptor-type tyrosine-protein phosphatase delta;Isoform A of Receptor-type tyrosine-protein phosphatase delta;Isoform B of Receptor-type tyrosine-prot…	PTPRD_MOUSE
Q64514-2	Tpp2	Isoform Short of Tripeptidyl-peptidase 2	TPP2_MOUSE
Q64516;Q64516-1;Q64516-2	Gk	Glycerol kinase;Isoform 1 of Glycerol kinase;Isoform 2 of Glycerol kinase	GLPK_MOUSE
Q64519	Sdc3	Syndecan-3	SDC3_MOUSE
Q64520;Q64520-2	Guk1	Guanylate kinase;Isoform 2 of Guanylate kinase	KGUA_MOUSE
Q64521	Gpd2	Glycerol-3-phosphate dehydrogenase, mitochondrial	GPDM_MOUSE
Q64523;Q6GSS7;Q8R1M2	H2ac20;Hist2h2aa1;H2aj	Histone H2A type 2-C;Histone H2A type 2-A;Histone H2A.J	H2A2C_MOUSE;H2A2A_MOUSE;H2AJ_MOUSE
Q64674	Srm	Spermidine synthase	SPEE_MOUSE
Q64727	Vcl	Vinculin	VINC_MOUSE
Q64737	Gart	Trifunctional purine biosynthetic protein adenosine-3	PUR2_MOUSE
Q66L44	Cbarp	Voltage-dependent calcium channel beta subunit-associated regulatory protein	CBARP_MOUSE
Q68ED7	Crtc1	CREB-regulated transcription coactivator 1	CRTC1_MOUSE
Q68EF0	Rab3ip	Rab-3A-interacting protein	RAB3I_MOUSE
Q68EF6	Begain	Brain-enriched guanylate kinase-associated protein	BEGIN_MOUSE
Q68FD5	Cltc	Clathrin heavy chain 1	CLH1_MOUSE
Q68FD9	Kiaa1549	UPF0606 protein KIAA1549	K1549_MOUSE
Q68FE6	Ripor1	Rho family-interacting cell polarization regulator 1	RIPR1_MOUSE
Q68FF6	Git1	ARF GTPase-activating protein GIT1	GIT1_MOUSE
Q68FH0;Q68FH0-2	Pkp4	Plakophilin-4;Isoform 2 of Plakophilin-4	PKP4_MOUSE
Q68FL4	Ahcyl2	Putative adenosylhomocysteinase 3	SAHH3_MOUSE
Q68FM6	Elfn2	Protein phosphatase 1 regulatory subunit 29	PPR29_MOUSE
Q69Z98;Q69Z98-2;Q69Z98-3;Q69Z98-4	Brsk2	Serine/threonine-protein kinase BRSK2;Isoform 2 of Serine/threonine-protein kinase BRSK2;Isoform 3 of Serine/threonine-protein kinase BRSK2;Isoform 4 of Serine/threonine-protein kinase BRSK2	BRSK2_MOUSE
Q69ZF3	Gba2	Non-lysosomal glucosylceramidase	GBA2_MOUSE
Q69ZH9	Arhgap23	Rho GTPase-activating protein 23	RHG23_MOUSE
Q69ZR2	Hectd1	E3 ubiquitin-protein ligase HECTD1	HECD1_MOUSE
Q69ZS6	Sv2c	Synaptic vesicle glycoprotein 2C	SV2C_MOUSE
Q69ZS7;Q69ZS7-2	Hbs1l	HBS1-like protein;Isoform 2 of HBS1-like protein	HBS1L_MOUSE
Q69ZS8	Kazn	Kazrin	KAZRN_MOUSE
Q69ZW3;Q69ZW3-2	Ehbp1	EH domain-binding protein 1;Isoform 2 of EH domain-binding protein 1	EHBP1_MOUSE
Q69ZX8	Ablim3	Actin-binding LIM protein 3	ABLM3_MOUSE
Q69ZZ6;Q69ZZ6-2;Q69ZZ6-3	Tmcc1	Transmembrane and coiled-coil domains protein 1;Isoform 2 of Transmembrane and coiled-coil domains protein 1;Isoform 3 of Transmembrane and coiled-coil domains protein 1	TMCC1_MOUSE
Q6A065	Cep170	Centrosomal protein of 170 kDa	CE170_MOUSE
Q6A0A9	FAM120A	Constitutive coactivator of PPAR-gamma-like protein 1	F120A_MOUSE
Q6A4J8;Q6A4J8-2;Q6A4J8-3	Usp7	Ubiquitin carboxyl-terminal hydrolase 7;Isoform 2 of Ubiquitin carboxyl-terminal hydrolase 7;Isoform 3 of Ubiquitin carboxyl-terminal hydrolase 7	UBP7_MOUSE
Q6DFV3	Arhgap21	Rho GTPase-activating protein 21	RHG21_MOUSE
Q6DFV7	Ncoa7	Nuclear receptor coactivator 7	NCOA7_MOUSE
Q6GQT9	Nomo1	Nodal modulator 1	NOMO1_MOUSE
Q6GU68	Islr	Immunoglobulin superfamily containing leucine-rich repeat protein	ISLR_MOUSE
Q6GYP7;Q6GYP7-2	Ralgapa1	Ral GTPase-activating protein subunit alpha-1;Isoform 2 of Ral GTPase-activating protein subunit alpha-1	RGPA1_MOUSE
Q6I6G8	Hecw2	E3 ubiquitin-protein ligase HECW2	HECW2_MOUSE
Q6IMP4;Q6IMP4-2	Panx2	Pannexin-2;Isoform 2 of Pannexin-2	PANX2_MOUSE
Q6IR34;Q6IR34-2	Gpsm1	G-protein-signaling modulator 1;Isoform 2 of G-protein-signaling modulator 1	GPSM1_MOUSE
Q6IRU2	Tpm4	Tropomyosin alpha-4 chain	TPM4_MOUSE
Q6IRU5	Cltb	Clathrin light chain B	CLCB_MOUSE
Q6IRU5-2	Cltb	Isoform 2 of Clathrin light chain B	CLCB_MOUSE
Q6NS60	Fbxo41	F-box only protein 41	FBX41_MOUSE
Q6NVE8	Wdr44	WD repeat-containing protein 44	WDR44_MOUSE
Q6NVE9;Q6NVE9-2	Pptc7	Protein phosphatase PTC7 homolog;Isoform 2 of Protein phosphatase PTC7 homolog	PPTC7_MOUSE
Q6NVF0	Ocrl	Inositol polyphosphate 5-phosphatase OCRL	OCRL_MOUSE
Q6NXK7	Dpp10	Inactive dipeptidyl peptidase 10	DPP10_MOUSE
Q6NZJ6	Eif4g1	Eukaryotic translation initiation factor 4 gamma 1	IF4G1_MOUSE
Q6NZL0	Soga3	Protein SOGA3	SOGA3_MOUSE
Q6P069;Q6P069-2	Sri	Sorcin;Isoform 2 of Sorcin	SORCN_MOUSE
Q6P1B1	Xpnpep1	Xaa-Pro aminopeptidase 1	XPP1_MOUSE
Q6P1D5;Q6P1D5-2	Sez6l	Seizure 6-like protein;Isoform 2 of Seizure 6-like protein	SE6L1_MOUSE
Q6P1F6	Ppp2r2a	Serine/threonine-protein phosphatase 2A 55 kDa regulatory subunit B alpha isoform	2ABA_MOUSE
Q6P1I6;Q6P1I6-2;Q6P1I6-3	Psd2	PH and SEC7 domain-containing protein 2;Isoform 2 of PH and SEC7 domain-containing protein 2;Isoform 3 of PH and SEC7 domain-containing protein 2	PSD2_MOUSE
Q6P2B1;Q6P2B1-2	Tnpo3	Transportin-3;Isoform 2 of Transportin-3	TNPO3_MOUSE
Q6P5E4	Uggt1	UDP-glucose:glycoprotein glucosyltransferase 1	UGGG1_MOUSE
Q6P5E8	Dgkq	Diacylglycerol kinase theta	DGKQ_MOUSE
Q6P5F6	Slc39a10	Zinc transporter ZIP10	S39AA_MOUSE
Q6P5F7	Ttyh3	Protein tweety homolog 3	TTYH3_MOUSE
Q6P5F9	Xpo1	Exportin-1	XPO1_MOUSE
Q6P5H2;Q6P5H2-2	Nes	Nestin;Isoform 2 of Nestin	NEST_MOUSE
Q6P5U7	Nwd2	NACHT and WD repeat domain-containing protein 2	NWD2_MOUSE
Q6P6J9	Txndc15	Thioredoxin domain-containing protein 15	TXD15_MOUSE
Q6P6N5	Spred3	Sprouty-related, EVH1 domain-containing protein 3	SPRE3_MOUSE
Q6P8K8	Cpa4	Carboxypeptidase A4	CBPA4_MOUSE
Q6P8X1	Snx6	Sorting nexin-6	SNX6_MOUSE
Q6P9J5	Kank4	KN motif and ankyrin repeat domain-containing protein 4	KANK4_MOUSE
Q6P9K8	Caskin1	Caskin-1	CSKI1_MOUSE
Q6P9K9	Nrxn3	Neurexin-3	NRX3A_MOUSE
Q6P9Q6;Q6P9Q6-2	Fkbp15	FK506-binding protein 15;Isoform B of FK506-binding protein 15	FKB15_MOUSE
Q6P9R2	Oxsr1	Serine/threonine-protein kinase OSR1	OXSR1_MOUSE
Q6P9S0	Mtss2	Protein MTSS 2	MTSS2_MOUSE
Q6PA06	Atl2	Atlastin-2	ATLA2_MOUSE
Q6PAJ1	Bcr	Breakpoint cluster region protein	BCR_MOUSE
Q6PAR5;Q6PAR5-2;Q6PAR5-4;Q6PAR5-6	Gapvd1	GTPase-activating protein and VPS9 domain-containing protein 1;Isoform 2 of GTPase-activating protein and VPS9 domain-containing protein 1;Isoform 4 of GTPase-activating protein and VPS9 domain-containing protein 1;Isoform 6 of GTPase-activating protein and VPS9 domain-containing protein 1	GAPD1_MOUSE
Q6PB44;Q6PB44-2	Ptpn23	Tyrosine-protein phosphatase non-receptor type 23;Isoform 2 of Tyrosine-protein phosphatase non-receptor type 23	PTN23_MOUSE
Q6PB66	Lrpprc	Leucine-rich PPR motif-containing protein, mitochondrial	LPPRC_MOUSE
Q6PCP5	Mff	Mitochondrial fission factor	MFF_MOUSE
Q6PD03	Ppp2r5a	Serine/threonine-protein phosphatase 2A 56 kDa regulatory subunit alpha isoform	2A5A_MOUSE
Q6PD26	Pigs	GPI transamidase component PIG-S	PIGS_MOUSE
Q6PDC8	Mfsd4a	Major facilitator superfamily domain-containing protein 4A	MFD4A_MOUSE
Q6PDI6	Mindy2	Ubiquitin carboxyl-terminal hydrolase MINDY-2	MINY2_MOUSE
Q6PDL0	Dync1li2	Cytoplasmic dynein 1 light intermediate chain 2	DC1L2_MOUSE
Q6PDM2;Q6PDM2-2;Q6PDM2-3	Srsf1	Serine/arginine-rich splicing factor 1;Isoform 2 of Serine/arginine-rich splicing factor 1;Isoform 3 of Serine/arginine-rich splicing factor 1	SRSF1_MOUSE
Q6PDY2	Ado	2-aminoethanethiol dioxygenase	AEDO_MOUSE
Q6PE13	Prrt3	Proline-rich transmembrane protein 3	PRRT3_MOUSE
Q6PE15;Q6PE15-2	Abhd10	Mycophenolic acid acyl-glucuronide esterase, mitochondrial;Isoform 2 of Mycophenolic acid acyl-glucuronide esterase, mitochondrial	ABHDA_MOUSE
Q6PER3	Mapre3	Microtubule-associated protein RP/EB family member 3	MARE3_MOUSE
Q6PEV3	Wipf2	WAS/WASL-interacting protein family member 2	WIPF2_MOUSE
Q6PFD5	Dlgap3	Disks large-associated protein 3	DLGP3_MOUSE
Q6PFE7;Q6PFE7-2;Q6PFE7-3	Tmeff1	Tomoregulin-1;Isoform 2 of Tomoregulin-1;Isoform 3 of Tomoregulin-1	TEFF1_MOUSE
Q6PFX7;Q6PFX7-2	Nyap1	Neuronal tyrosine-phosphorylated phosphoinositide-3-kinase adapter 1;Isoform 2 of Neuronal tyrosine-phosphorylated phosphoinositide-3-kinase adapter 1	NYAP1_MOUSE
Q6PFY1	Fchsd1	F-BAR and double SH3 domains protein 1	FCSD1_MOUSE
Q6PGB6;Q6PGB6-2;Q6PGB6-3;Q6PGB6-4;Q6PGB6-5	Naa50	N-alpha-acetyltransferase 50;Isoform 2 of N-alpha-acetyltransferase 50;Isoform 3 of N-alpha-acetyltransferase 50;Isoform 4 of N-alpha-acetyltransferase 50;Isoform 5 of N-alpha-acetyltransferase 50	NAA50_MOUSE
Q6PGE7	Slc6a7	Sodium-dependent proline transporter	SC6A7_MOUSE
Q6PGF7	Exoc8	Exocyst complex component 8	EXOC8_MOUSE
Q6PGH2	Jpt2	Jupiter microtubule associated homolog 2	JUPI2_MOUSE
Q6PGN3-3;Q6PGN3-4;Q6PGN3-5	Dclk2	Isoform 3 of Serine/threonine-protein kinase DCLK2;Isoform 4 of Serine/threonine-protein kinase DCLK2;Isoform 5 of Serine/threonine-protein kinase DCLK2	DCLK2_MOUSE
Q6PH08	Erc2	ERC protein 2	ERC2_MOUSE
Q6PHN9	Rab35	Ras-related protein Rab-35	RAB35_MOUSE
Q6PHU5;Q6PHU5-2	Sort1	Sortilin;Isoform 2 of Sortilin	SORT_MOUSE
Q6PHZ2-5	Camk2d	Isoform 4 of Calcium/calmodulin-dependent protein kinase type II subunit delta	KCC2D_MOUSE
Q6PHZ8;Q6PHZ8-2;Q6PHZ8-3;Q6PHZ8-4	Kcnip4	Kv channel-interacting protein 4;Isoform 2 of Kv channel-interacting protein 4;Isoform 3 of Kv channel-interacting protein 4;Isoform 4 of Kv channel-interacting protein 4	KCIP4_MOUSE
Q6PIC6	Atp1a3	Sodium/potassium-transporting ATPase subunit alpha-3	AT1A3_MOUSE
Q6PIE5	Atp1a2	Sodium/potassium-transporting ATPase subunit alpha-2	AT1A2_MOUSE
Q6PIP5	Nudcd1	NudC domain-containing protein 1	NUDC1_MOUSE
Q6Q477;Q6Q477-2	Atp2b4	Plasma membrane calcium-transporting ATPase 4;Isoform 2 of Plasma membrane calcium-transporting ATPase 4	AT2B4_MOUSE
Q6QWF9	Camk2n1	Calcium/calmodulin-dependent protein kinase II inhibitor 1	CK2N1_MOUSE
Q6R891	Ppp1r9b	Neurabin-2	NEB2_MOUSE
Q6RHR9;Q6RHR9-3	Magi1	Membrane-associated guanylate kinase, WW and PDZ domain-containing protein 1;Isoform 3 of Membrane-associated guanylate kinase, WW and PDZ domain-containing protein 1	MAGI1_MOUSE
Q6TEK5	Vkorc1l1	Vitamin K epoxide reductase complex subunit 1-like protein 1	VKORL_MOUSE
Q6URW6;Q6URW6-2;Q6URW6-3	Myh14	Myosin-14;Isoform 2 of Myosin-14;Isoform 3 of Myosin-14	MYH14_MOUSE
Q6VNB8	Wdfy3	WD repeat and FYVE domain-containing protein 3	WDFY3_MOUSE
Q6W8Q3	Pcp4l1	Purkinje cell protein 4-like protein 1	PC4L1_MOUSE
Q6WVG3	Kctd12	BTB/POZ domain-containing protein KCTD12	KCD12_MOUSE
Q6X893;Q6X893-2	Slc44a1	Choline transporter-like protein 1;Isoform 2 of Choline transporter-like protein 1	CTL1_MOUSE
Q6ZPE2;Q6ZPE2-2	Sbf1	Myotubularin-related protein 5;Isoform 2 of Myotubularin-related protein 5	MTMR5_MOUSE
Q6ZPJ0	Tex2	Testis-expressed protein 2	TEX2_MOUSE
Q6ZPJ3	Ube2o	(E3-independent) E2 ubiquitin-conjugating enzyme UBE2O	UBE2O_MOUSE
Q6ZPQ6;Q6ZPQ6-2	Pitpnm2	Membrane-associated phosphatidylinositol transfer protein 2;Isoform 2 of Membrane-associated phosphatidylinositol transfer protein 2	PITM2_MOUSE
Q6ZPU9;Q6ZPU9-3	Kifbp	KIF-binding protein;Isoform 3 of KIF-binding protein	KBP_MOUSE
Q6ZQ18	Efr3b	Protein EFR3 homolog B	EFR3B_MOUSE
Q6ZQ29-2	Taok2	Isoform 2 of Serine/threonine-protein kinase TAO2	TAOK2_MOUSE
Q6ZQ38	Cand1	Cullin-associated NEDD8-dissociated protein 1	CAND1_MOUSE
Q6ZQ58	Larp1	La-related protein 1	LARP1_MOUSE
Q6ZQI3	Mlec	Malectin	MLEC_MOUSE
Q6ZQM8	Ugt1a7c	UDP-glucuronosyltransferase 1-7C	UD17C_MOUSE
Q6ZWN5	Rps9	40S ribosomal protein S9	RS9_MOUSE
Q6ZWQ7	Spcs3	Signal peptidase complex subunit 3	SPCS3_MOUSE
Q6ZWU9	Rps27	40S ribosomal protein S27	RS27_MOUSE
Q6ZWV3	Rpl10	60S ribosomal protein L10	RL10_MOUSE
Q6ZWV7	Rpl35	60S ribosomal protein L35	RL35_MOUSE
Q6ZWX6	Eif2s1	Eukaryotic translation initiation factor 2 subunit 1	IF2A_MOUSE
Q6ZWY8	Tmsb10	Thymosin beta-10	TYB10_MOUSE
Q71LX4	Tln2	Talin-2	TLN2_MOUSE
Q71M36;Q71M36-2;Q71M36-4	Cspg5	Chondroitin sulfate proteoglycan 5;Isoform 2 of Chondroitin sulfate proteoglycan 5;Isoform 4 of Chondroitin sulfate proteoglycan 5	CSPG5_MOUSE
Q76KF0;Q76KF0-2;Q76KF0-3;Q76KF0-4;Q76KF0-5;Q76KF0-6	Sema6d	Semaphorin-6D;Isoform 1 of Semaphorin-6D;Isoform 2 of Semaphorin-6D;Isoform 3 of Semaphorin-6D;Isoform 5 of Semaphorin-6D;Isoform 6 of Semaphorin-6D	SEM6D_MOUSE
Q76MZ3	Ppp2r1a	Serine/threonine-protein phosphatase 2A 65 kDa regulatory subunit A alpha isoform	2AAA_MOUSE
Q78IK2	Atp5md	ATP synthase membrane subunit DAPIT, mitochondrial	ATPMD_MOUSE
Q78IK4	Apool	MICOS complex subunit Mic27	MIC27_MOUSE
Q78JW9	Ubfd1	Ubiquitin domain-containing protein UBFD1	UBFD1_MOUSE
Q78PY7	Snd1	Staphylococcal nuclease domain-containing protein 1	SND1_MOUSE
Q78T54;Q78T54-2	Vma21	Vacuolar ATPase assembly integral membrane protein Vma21;Isoform 2 of Vacuolar ATPase assembly integral membrane protein Vma21	VMA21_MOUSE
Q78WH7	Camk2n2	Calcium/calmodulin-dependent protein kinase II inhibitor 2	CK2N2_MOUSE
Q78XF5	Ostc	Oligosaccharyltransferase complex subunit OSTC	OSTC_MOUSE
Q78YZ6;Q78YZ6-2;Q78YZ6-3	Scoc	Short coiled-coil protein;Isoform 2 of Short coiled-coil protein;Isoform 3 of Short coiled-coil protein	SCOC_MOUSE
Q78ZA7	Nap1l4	Nucleosome assembly protein 1-like 4	NP1L4_MOUSE
Q791T5;Q791T5-2	Mtch1	Mitochondrial carrier homolog 1;Isoform 2 of Mitochondrial carrier homolog 1	MTCH1_MOUSE
Q791V5	Mtch2	Mitochondrial carrier homolog 2	MTCH2_MOUSE
Q7M6Y3;Q7M6Y3-5;Q7M6Y3-6	Picalm	Phosphatidylinositol-binding clathrin assembly protein;Isoform 5 of Phosphatidylinositol-binding clathrin assembly protein;Isoform 6 of Phosphatidylinositol-binding clathrin assembly protein	PICAL_MOUSE
Q7M729	Scn4b	Sodium channel subunit beta-4	SCN4B_MOUSE
Q7M732	Rtl1	Retrotransposon-like protein 1	RTL1_MOUSE
Q7SIG6	Asap2	Arf-GAP with SH3 domain, ANK repeat and PH domain-containing protein 2	ASAP2_MOUSE
Q7TMB8	Cyfip1	Cytoplasmic FMR1-interacting protein 1	CYFP1_MOUSE
Q7TME0	Plppr4	Phospholipid phosphatase-related protein type 4	PLPR4_MOUSE
Q7TMF3	Ndufa12	NADH dehydrogenase [ubiquinone] 1 alpha subcomplex subunit 12	NDUAC_MOUSE
Q7TMK9-2	Syncrip	Isoform 2 of Heterogeneous nuclear ribonucleoprotein Q	HNRPQ_MOUSE
Q7TMM9	Tubb2a	Tubulin beta-2A chain	TBB2A_MOUSE
Q7TMQ7	Wdr91	WD repeat-containing protein 91	WDR91_MOUSE
Q7TMS5	Abcg2	Broad substrate specificity ATP-binding cassette transporter ABCG2	ABCG2_MOUSE
Q7TMY8;Q7TMY8-3;Q7TMY8-4	Huwe1	E3 ubiquitin-protein ligase HUWE1;Isoform 3 of E3 ubiquitin-protein ligase HUWE1;Isoform 4 of E3 ubiquitin-protein ligase HUWE1	HUWE1_MOUSE
Q7TN29	Smap2	Stromal membrane-associated protein 2	SMAP2_MOUSE
Q7TN99;Q7TN99-2;Q7TN99-3;Q7TN99-4	Cpeb3	Cytoplasmic polyadenylation element-binding protein 3;Isoform 2 of Cytoplasmic polyadenylation element-binding protein 3;Isoform 3 of Cytoplasmic polyadenylation element-binding protein 3;Isoform 4 of Cytoplasmic polyadenylation element-binding protein 3	CPEB3_MOUSE
Q7TNG5	Eml2	Echinoderm microtubule-associated protein-like 2	EMAL2_MOUSE
Q7TNR6	Igsf21	Immunoglobulin superfamily member 21	IGS21_MOUSE
Q7TPB0	Plppr3	Phospholipid phosphatase-related protein type 3	PLPR3_MOUSE
Q7TPC1	Cdsn	Corneodesmosin	CDSN_MOUSE
Q7TPD3	Robo2	Roundabout homolog 2	ROBO2_MOUSE
Q7TPH6;Q7TPH6-2	Mycbp2	E3 ubiquitin-protein ligase MYCBP2;Isoform 2 of E3 ubiquitin-protein ligase MYCBP2	MYCB2_MOUSE
Q7TPM6	Fsd1	Fibronectin type III and SPRY domain-containing protein 1	FSD1_MOUSE
Q7TPR4	Actn1	Alpha-actinin-1	ACTN1_MOUSE
Q7TPS5;Q7TPS5-2;Q7TPS5-3	C2cd5	C2 domain-containing protein 5;Isoform 2 of C2 domain-containing protein 5;Isoform 3 of C2 domain-containing protein 5	C2CD5_MOUSE
Q7TPV2;Q7TPV2-2;Q7TPV2-3	Dzip3	E3 ubiquitin-protein ligase DZIP3;Isoform 2 of E3 ubiquitin-protein ligase DZIP3;Isoform 3 of E3 ubiquitin-protein ligase DZIP3	DZIP3_MOUSE
Q7TQ95	Lnpk	Endoplasmic reticulum junction formation protein lunapark	LNP_MOUSE
Q7TQD2	Tppp	Tubulin polymerization-promoting protein	TPPP_MOUSE
Q7TQF7	Amph	Amphiphysin	AMPH_MOUSE
Q7TQH0;Q7TQH0-2;Q7TQH0-3	Atxn2l	Ataxin-2-like protein;Isoform 2 of Ataxin-2-like protein;Isoform 3 of Ataxin-2-like protein	ATX2L_MOUSE
Q7TQI3	Otub1	Ubiquitin thioesterase OTUB1	OTUB1_MOUSE
Q7TSC1	Prrc2a	Protein PRRC2A	PRC2A_MOUSE
Q7TSE6;Q7TSE6-2	Stk38l	Serine/threonine-protein kinase 38-like;Isoform 2 of Serine/threonine-protein kinase 38-like	ST38L_MOUSE
Q7TSF1	Dsg1b	Desmoglein-1-beta	DSG1B_MOUSE
Q7TSH9	Zfp184	Zinc finger protein 184	ZN184_MOUSE
Q7TSJ2	Map6	Microtubule-associated protein 6	MAP6_MOUSE
Q7TSS2;Q7TSS2-2	Ube2q1	Ubiquitin-conjugating enzyme E2 Q1;Isoform 2 of Ubiquitin-conjugating enzyme E2 Q1	UB2Q1_MOUSE
Q7TSY6;Q7TSY6-2;Q7TSY6-3;Q7TSY6-4;Q7TSY6-5;Q7TSY6-6	Celf4	CUGBP Elav-like family member 4;Isoform 2 of CUGBP Elav-like family member 4;Isoform 3 of CUGBP Elav-like family member 4;Isoform 4 of CUGBP Elav-like family member 4;Isoform 5 of CUGBP Elav-like family member 4;Isoform 6 of CUGBP Elav-like family member 4	CELF4_MOUSE
Q7TT37	Elp1	Elongator complex protein 1	ELP1_MOUSE
Q7TT50	Cdc42bpb	Serine/threonine-protein kinase MRCK beta	MRCKB_MOUSE
Q80SW1	Ahcyl1	S-adenosylhomocysteine hydrolase-like protein 1	SAHH2_MOUSE
Q80SY6;Q80SY6-2;Q80SY6-4	Adal	Adenosine deaminase-like protein;Isoform 2 of Adenosine deaminase-like protein;Isoform 4 of Adenosine deaminase-like protein	ADAL_MOUSE
Q80SZ7	Gng5	Guanine nucleotide-binding protein G(I)/G(S)/G(O) subunit gamma-5	GBG5_MOUSE
Q80T41	Gabbr2	Gamma-aminobutyric acid type B receptor subunit 2	GABR2_MOUSE
Q80TA1	Selenoi	Ethanolaminephosphotransferase 1	EPT1_MOUSE
Q80TB8	Vat1l	Synaptic vesicle membrane protein VAT-1 homolog-like	VAT1L_MOUSE
Q80TE0	Rpap1	RNA polymerase II-associated protein 1	RPAP1_MOUSE
Q80TE7	Lrrc7	Leucine-rich repeat-containing protein 7	LRRC7_MOUSE
Q80TF3	Pcdh19	Protocadherin-19	PCD19_MOUSE
Q80TJ1-4	Cadps	Isoform 4 of Calcium-dependent secretion activator 1	CAPS1_MOUSE
Q80TK0	Kiaa1107	AP2-interacting clathrin-endocytosis protein	K1107_MOUSE
Q80TL0	Ppm1e	Protein phosphatase 1E	PPM1E_MOUSE
Q80TL4	Phf24	PHD finger protein 24	PHF24_MOUSE
Q80TM9	Nisch	Nischarin	NISCH_MOUSE
Q80TN4	Dnajc16	DnaJ homolog subfamily C member 16	DJC16_MOUSE
Q80TN5;Q80TN5-2	Zdhhc17	Palmitoyltransferase ZDHHC17;Isoform 2 of Palmitoyltransferase ZDHHC17	ZDH17_MOUSE
Q80TN7	Nav3	Neuron navigator 3	NAV3_MOUSE
Q80TQ2;Q80TQ2-2	Cyld	Ubiquitin carboxyl-terminal hydrolase CYLD;Isoform 1 of Ubiquitin carboxyl-terminal hydrolase CYLD	CYLD_MOUSE
Q80TR1;Q80TR1-2	Adgrl1	Adhesion G protein-coupled receptor L1;Isoform 2 of Adhesion G protein-coupled receptor L1	AGRL1_MOUSE
Q80TS3;Q80TS3-2;Q80TS3-3;Q80TS3-4;Q80TS3-5;Q80TS3-6	Adgrl3	Adhesion G protein-coupled receptor L3;Isoform 2 of Adhesion G protein-coupled receptor L3;Isoform 3 of Adhesion G protein-coupled receptor L3;Isoform 4 of Adhesion G protein-coupled receptor L3;Isoform 5 of Adhesion G protein-coupled receptor L3;Isoform 6 of Adhesion G protein-coupled receptor L3	AGRL3_MOUSE
Q80TV8;Q80TV8-2	Clasp1	CLIP-associating protein 1;Isoform 2 of CLIP-associating protein 1	CLAP1_MOUSE
Q80TY0;Q80TY0-2;Q80TY0-3	Fnbp1	Formin-binding protein 1;Isoform 2 of Formin-binding protein 1;Isoform 3 of Formin-binding protein 1	FNBP1_MOUSE
Q80TZ3	Dnajc6	Putative tyrosine-protein phosphatase auxilin	AUXI_MOUSE
Q80TZ3-2	Dnajc6	Isoform 2 of Putative tyrosine-protein phosphatase auxilin	AUXI_MOUSE
Q80TZ3-3	Dnajc6	Isoform 3 of Putative tyrosine-protein phosphatase auxilin	AUXI_MOUSE
Q80U04;Q80U04-2	Pja2	E3 ubiquitin-protein ligase Praja-2;Isoform 2 of E3 ubiquitin-protein ligase Praja-2	PJA2_MOUSE
Q80U23-2	Snph	Isoform 2 of Syntaphilin	SNPH_MOUSE
Q80U28;Q80U28-15	Madd	MAP kinase-activating death domain protein;Isoform 15 of MAP kinase-activating death domain protein	MADD_MOUSE
Q80U28-14	Madd	Isoform 14 of MAP kinase-activating death domain protein	MADD_MOUSE
Q80U28-4;Q80U28-7	Madd	Isoform 4 of MAP kinase-activating death domain protein;Isoform 7 of MAP kinase-activating death domain protein	MADD_MOUSE
Q80U35;Q80U35-2	Arhgef17	Rho guanine nucleotide exchange factor 17;Isoform 2 of Rho guanine nucleotide exchange factor 17	ARHGH_MOUSE
Q80U40;Q80U40-2	Rimbp2	RIMS-binding protein 2;Isoform 2 of RIMS-binding protein 2	RIMB2_MOUSE
Q80U49	Cep170b	Centrosomal protein of 170 kDa protein B	C170B_MOUSE
Q80U56	Avl9	Late secretory pathway protein AVL9 homolog	AVL9_MOUSE
Q80U63;Q80U63-2	Mfn2	Mitofusin-2;Isoform 2 of Mitofusin-2	MFN2_MOUSE
Q80U87	Usp8	Ubiquitin carboxyl-terminal hydrolase 8	UBP8_MOUSE
Q80UG1	Fads6	Fatty acid desaturase 6	FADS6_MOUSE
Q80UG2	Plxna4	Plexin-A4	PLXA4_MOUSE
Q80UJ7	Rab3gap1	Rab3 GTPase-activating protein catalytic subunit	RB3GP_MOUSE
Q80UK0	Sestd1	SEC14 domain and spectrin repeat-containing protein 1	SESD1_MOUSE
Q80UM7	Mogs	Mannosyl-oligosaccharide glucosidase	MOGS_MOUSE
Q80UP3	Dgkz	Diacylglycerol kinase zeta	DGKZ_MOUSE
Q80UP8	Slc20a2	Sodium-dependent phosphate transporter 2	S20A2_MOUSE
Q80UW2	Fbxo2	F-box only protein 2	FBX2_MOUSE
Q80V42	Cpm	Carboxypeptidase M	CBPM_MOUSE
Q80V91	Dtx3	Probable E3 ubiquitin-protein ligase DTX3	DTX3_MOUSE
Q80VC9;Q80VC9-10;Q80VC9-11;Q80VC9-12;Q80VC9-14;Q80VC9-2;Q80VC9-3;Q80VC9-4;Q80VC9-5	Camsap3	Calmodulin-regulated spectrin-associated protein 3;Isoform 10 of Calmodulin-regulated spectrin-associated protein 3;Isoform 11 of Calmodulin-regulated spectrin-associated protein 3;Isoform 12 of Calmodulin-regulated spectrin-associated protein 3;Isoform 14 of Calmodulin-regulated spectrin-associated protein 3;Isoform 2 of Calmodulin-regulated spectrin-associated protein 3;Isoform 3 of Calmodulin-…	CAMP3_MOUSE
Q80VJ2	Sra1	Steroid receptor RNA activator 1	SRA1_MOUSE
Q80VP0	Tecpr1	Tectonin beta-propeller repeat-containing protein 1	TCPR1_MOUSE
Q80VP1;Q80VP1-2	Epn1	Epsin-1;Isoform 2 of Epsin-1	EPN1_MOUSE
Q80VP2	Spata7	Spermatogenesis-associated protein 7 homolog	SPAT7_MOUSE
Q80W04	Tmcc2	Transmembrane and coiled-coil domains protein 2	TMCC2_MOUSE
Q80W47	Wipi2	WD repeat domain phosphoinositide-interacting protein 2	WIPI2_MOUSE
Q80W54	Zmpste24	CAAX prenyl protease 1 homolog	FACE1_MOUSE
Q80WC7;Q80WC7-2	Agfg2	Arf-GAP domain and FG repeat-containing protein 2;Isoform 2 of Arf-GAP domain and FG repeat-containing protein 2	AGFG2_MOUSE
Q80WJ7	Mtdh	Protein LYRIC	LYRIC_MOUSE
Q80WQ2	Vac14	Protein VAC14 homolog	VAC14_MOUSE
Q80WQ6	Rhbdf2	Inactive rhomboid protein 2	RHDF2_MOUSE
Q80WT5;Q80WT5-2	Aftph	Aftiphilin;Isoform 2 of Aftiphilin	AFTIN_MOUSE
Q80X50;Q80X50-2;Q80X50-3;Q80X50-4;Q80X50-5	Ubap2l	Ubiquitin-associated protein 2-like;Isoform 2 of Ubiquitin-associated protein 2-like;Isoform 3 of Ubiquitin-associated protein 2-like;Isoform 4 of Ubiquitin-associated protein 2-like;Isoform 5 of Ubiquitin-associated protein 2-like	UBP2L_MOUSE
Q80X72	Lrrc15	Leucine-rich repeat-containing protein 15	LRC15_MOUSE
Q80X80	C2cd2l	Phospholipid transfer protein C2CD2L	C2C2L_MOUSE
Q80X90	Flnb	Filamin-B	FLNB_MOUSE
Q80XA6	Reps2	RalBP1-associated Eps domain-containing protein 2	REPS2_MOUSE
Q80XI3;Q80XI3-2;Q80XI3-3;Q80XI3-4	Eif4g3	Eukaryotic translation initiation factor 4 gamma 3;Isoform 2 of Eukaryotic translation initiation factor 4 gamma 3;Isoform 3 of Eukaryotic translation initiation factor 4 gamma 3;Isoform 4 of Eukaryotic translation initiation factor 4 gamma 3	IF4G3_MOUSE
Q80XI4	Pip4k2b	Phosphatidylinositol 5-phosphate 4-kinase type-2 beta	PI42B_MOUSE
Q80XK6	Atg2b	Autophagy-related protein 2 homolog B	ATG2B_MOUSE
Q80XN0	Bdh1	D-beta-hydroxybutyrate dehydrogenase, mitochondrial	BDH_MOUSE
Q80XP9;Q80XP9-2	Wnk3	Serine/threonine-protein kinase WNK3;Isoform 2 of Serine/threonine-protein kinase WNK3	WNK3_MOUSE
Q80XQ2	Tbc1d5	TBC1 domain family member 5	TBCD5_MOUSE
Q80XU3	Nucks1	Nuclear ubiquitous casein and cyclin-dependent kinase substrate 1	NUCKS_MOUSE
Q80Y44	Ddx10	Probable ATP-dependent RNA helicase DDX10	DDX10_MOUSE
Q80Y55	Bsdc1	BSD domain-containing protein 1	BSDC1_MOUSE
Q80YA3;Q80YA3-2	Ddhd1	Phospholipase DDHD1;Isoform 2 of Phospholipase DDHD1	DDHD1_MOUSE
Q80YA9	Cnksr2	Connector enhancer of kinase suppressor of ras 2	CNKR2_MOUSE
Q80YE4;Q80YE4-2;Q80YE4-3	Aatk	Serine/threonine-protein kinase LMTK1;Isoform 2 of Serine/threonine-protein kinase LMTK1;Isoform 3 of Serine/threonine-protein kinase LMTK1	LMTK1_MOUSE
Q80YN3	Bcas1	Breast carcinoma-amplified sequence 1 homolog	BCAS1_MOUSE
Q80YV4;Q80YV4-2	Pank4	4'-phosphopantetheine phosphatase;Isoform 2 of 4'-phosphopantetheine phosphatase	PANK4_MOUSE
Q80Z24	Negr1	Neuronal growth regulator 1	NEGR1_MOUSE
Q80Z38;Q80Z38-2;Q80Z38-3	Shank2	SH3 and multiple ankyrin repeat domains protein 2;Isoform 2 of SH3 and multiple ankyrin repeat domains protein 2;Isoform 3 of SH3 and multiple ankyrin repeat domains protein 2	SHAN2_MOUSE
Q80ZI6	Lrsam1	E3 ubiquitin-protein ligase LRSAM1	LRSM1_MOUSE
Q80ZJ1	Rap2a	Ras-related protein Rap-2a	RAP2A_MOUSE
Q80ZJ6;Q80ZJ6-2	Zer1	Protein zer-1 homolog;Isoform 2 of Protein zer-1 homolog	ZER1_MOUSE
Q810A3	Ttc9c	Tetratricopeptide repeat protein 9C	TTC9C_MOUSE
Q810J8	Zfyve1	Zinc finger FYVE domain-containing protein 1	ZFYV1_MOUSE
Q810U3	Nfasc	Neurofascin	NFASC_MOUSE
Q810U4;Q810U4-2;Q810U4-3	Nrcam	Neuronal cell adhesion molecule;Isoform 2 of Neuronal cell adhesion molecule;Isoform 3 of Neuronal cell adhesion molecule	NRCAM_MOUSE
Q810V0	Mphosph10	U3 small nucleolar ribonucleoprotein protein MPP10	MPP10_MOUSE
Q811D0;Q811D0-2;Q811D0-3	Dlg1	Disks large homolog 1;Isoform 2 of Disks large homolog 1;Isoform 3 of Disks large homolog 1	DLG1_MOUSE
Q811I0	Atpaf1	ATP synthase mitochondrial F1 complex assembly factor 1	ATPF1_MOUSE
Q811P8	Arhgap32	Rho GTPase-activating protein 32	RHG32_MOUSE
Q811S7;Q811S7-2;Q9ERA0;Q9ERA0-2;Q9ERA0-3	Ubp1;Ubp1;Tfcp2;Tfcp2;Tfcp2	Upstream-binding protein 1;Isoform 2 of Upstream-binding protein 1;Alpha-globin transcription factor CP2;Isoform 2 of Alpha-globin transcription factor CP2;Isoform 3 of Alpha-globin transcription factor CP2	UBIP1_MOUSE;UBIP1_MOUSE;TFCP2_MOUSE;TFCP2_MOUSE;TFCP2_MOUSE
Q812A2	Srgap3	SLIT-ROBO Rho GTPase-activating protein 3	SRGP3_MOUSE
Q8BFP9	Pdk1	[Pyruvate dehydrogenase (acetyl-transferring)] kinase isozyme 1, mitochondrial	PDK1_MOUSE
Q8BFQ8	Gatd1	Glutamine amidotransferase-like class 1 domain-containing protein 1	GALD1_MOUSE
Q8BFR4	Gns	N-acetylglucosamine-6-sulfatase	GNS_MOUSE
Q8BFR5	Tufm	Elongation factor Tu, mitochondrial	EFTU_MOUSE
Q8BFT9	Svop	Synaptic vesicle 2-related protein	SVOP_MOUSE
Q8BFU3;Q8BFU3-3;Q8BFU3-5	Rnf214	RING finger protein 214;Isoform 3 of RING finger protein 214;Isoform 5 of RING finger protein 214	RN214_MOUSE
Q8BFY6	Pef1	Peflin	PEF1_MOUSE
Q8BFY9;Q8BFY9-2	Tnpo1	Transportin-1;Isoform 2 of Transportin-1	TNPO1_MOUSE
Q8BFZ2;Q8BFZ2-2	Plppr1	Phospholipid phosphatase-related protein type 1;Isoform 2 of Phospholipid phosphatase-related protein type 1	PLPR1_MOUSE
Q8BFZ9	Erlin2	Erlin-2	ERLN2_MOUSE
Q8BG05	Hnrnpa3	Heterogeneous nuclear ribonucleoprotein A3	ROA3_MOUSE
Q8BG32	Psmd11	26S proteasome non-ATPase regulatory subunit 11	PSD11_MOUSE
Q8BG39	Sv2b	Synaptic vesicle glycoprotein 2B	SV2B_MOUSE
Q8BG40	Katnb1	Katanin p80 WD40 repeat-containing subunit B1	KTNB1_MOUSE
Q8BG51;Q8BG51-2;Q8BG51-3;Q8BG51-4	Rhot1	Mitochondrial Rho GTPase 1;Isoform 2 of Mitochondrial Rho GTPase 1;Isoform 3 of Mitochondrial Rho GTPase 1;Isoform 4 of Mitochondrial Rho GTPase 1	MIRO1_MOUSE
Q8BG73	Sh3bgrl2	SH3 domain-binding glutamic acid-rich-like protein 2	SH3L2_MOUSE
Q8BG92	Clvs2	Clavesin-2	CLVS2_MOUSE
Q8BGB5	Limd2	LIM domain-containing protein 2	LIMD2_MOUSE
Q8BGB7;Q8BGB7-2	Enoph1	Enolase-phosphatase E1;Isoform 2 of Enolase-phosphatase E1	ENOPH_MOUSE
Q8BGD5	Cpt1c	Carnitine O-palmitoyltransferase 1, brain isoform	CPT1C_MOUSE
Q8BGD9	Eif4b	Eukaryotic translation initiation factor 4B	IF4B_MOUSE
Q8BGE6	Atg4b	Cysteine protease ATG4B	ATG4B_MOUSE
Q8BGF9	Slc25a44	Solute carrier family 25 member 44	S2544_MOUSE
Q8BGG7	Ubash3b	Ubiquitin-associated and SH3 domain-containing protein B	UBS3B_MOUSE
Q8BGH2	Samm50	Sorting and assembly machinery component 50 homolog	SAM50_MOUSE
Q8BGH4	Reep1	Receptor expression-enhancing protein 1	REEP1_MOUSE
Q8BGK5	Slc35f1	Solute carrier family 35 member F1	S35F1_MOUSE
Q8BGK6	Slc7a6	Y+L amino acid transporter 2	YLAT2_MOUSE
Q8BGN3	Enpp6	Glycerophosphocholine cholinephosphodiesterase ENPP6	ENPP6_MOUSE
Q8BGN5	Nipal3	NIPA-like protein 3	NPAL3_MOUSE
Q8BGQ1	Vipas39	Spermatogenesis-defective protein 39 homolog	SPE39_MOUSE
Q8BGQ7	Aars1	Alanine--tRNA ligase, cytoplasmic	SYAC_MOUSE
Q8BGS2;Q8BGS2-2	Bola2	BolA-like protein 2;Isoform 2 of BolA-like protein 2	BOLA2_MOUSE
Q8BGS7;Q8BGS7-2	Cept1	Choline/ethanolaminephosphotransferase 1;Isoform 2 of Choline/ethanolaminephosphotransferase 1	CEPT1_MOUSE
Q8BGT8	Phyhipl	Phytanoyl-CoA hydroxylase-interacting protein-like	PHIPL_MOUSE
Q8BGU5;Q8BGU5-2	Ccny	Cyclin-Y;Isoform 2 of Cyclin-Y	CCNY_MOUSE
Q8BGY9	Slc5a7	High affinity choline transporter 1	SC5A7_MOUSE
Q8BGZ1	Hpcal4	Hippocalcin-like protein 4	HPCL4_MOUSE
Q8BH44	Coro2b	Coronin-2B	COR2B_MOUSE
Q8BH57;Q8BH57-2	Wdr48	WD repeat-containing protein 48;Isoform 2 of WD repeat-containing protein 48	WDR48_MOUSE
Q8BH58	Tiprl	TIP41-like protein	TIPRL_MOUSE
Q8BH59	Slc25a12	Calcium-binding mitochondrial carrier protein Aralar1	CMC1_MOUSE
Q8BH60;Q8BH60-2	Gopc	Golgi-associated PDZ and coiled-coil motif-containing protein;Isoform 2 of Golgi-associated PDZ and coiled-coil motif-containing protein	GOPC_MOUSE
Q8BH66	Atl1	Atlastin-1	ATLA1_MOUSE
Q8BH70	Fbxl4	F-box/LRR-repeat protein 4	FBXL4_MOUSE
Q8BH93	Mapk1ip1l	MAPK-interacting and spindle-stabilizing protein-like	MISSL_MOUSE
Q8BH97	Rcn3	Reticulocalbin-3	RCN3_MOUSE
Q8BHC1	Rab39b	Ras-related protein Rab-39B	RB39B_MOUSE
Q8BHE3	Atcay	Caytaxin	ATCAY_MOUSE
Q8BHH1	Aqp11	Aquaporin-11	AQP11_MOUSE
Q8BHH2	Rab9b	Ras-related protein Rab-9B	RAB9B_MOUSE
Q8BHJ6	Serinc5	Serine incorporator 5	SERC5_MOUSE
Q8BHK1	Nipa1	Magnesium transporter NIPA1	NIPA1_MOUSE
Q8BHK2	Scn3b	Sodium channel subunit beta-3	SCN3B_MOUSE
Q8BHL3	Tbc1d10b	TBC1 domain family member 10B	TB10B_MOUSE
Q8BHL8	Psmf1	Proteasome inhibitor PI31 subunit	PSMF1_MOUSE
Q8BHN0	Ppm1l	Protein phosphatase 1L	PPM1L_MOUSE
Q8BHN3-2	Ganab	Isoform 2 of Neutral alpha-glucosidase AB	GANAB_MOUSE
Q8BHW2	Oscp1	Protein OSCP1	OSCP1_MOUSE
Q8BHW5;Q8BHW5-3	Tmem255a	Transmembrane protein 255A;Isoform 3 of Transmembrane protein 255A	T255A_MOUSE
Q8BHZ0	Cyria	CYFIP-related Rac1 interactor A	CYRIA_MOUSE
Q8BI08	Mal2	Protein MAL2	MAL2_MOUSE
Q8BI84	Mia3	Transport and Golgi organization protein 1 homolog	TGO1_MOUSE
Q8BIE6;Q8BIE6-2	Frmd4a	FERM domain-containing protein 4A;Isoform 2 of FERM domain-containing protein 4A	FRM4A_MOUSE
Q8BIF0;Q8BIF0-2	Cd99l2	CD99 antigen-like protein 2;Isoform 2 of CD99 antigen-like protein 2	C99L2_MOUSE
Q8BIF2;Q8BIF2-2;Q8BIF2-4;Q8BIF2-5;Q8BP71;Q8BP71-2;Q8BP71-3;Q8BP71-5;Q8BP71-6;Q8BP71-7;Q8BP71-8;Q9JJ43;Q9JJ43-2;Q9JJ43-3;Q9JJ43-4;Q9JJ43-5;Q9JJ43-6	Rbfox3;Rbfox3;Rbfox3;Rbfox3;Rbfox2;Rbfox2;Rbfox2;Rbfox2;Rbfox2;Rbfox2;Rbfox2;Rbfox1;Rbfox1;Rbfox1;Rbfox1;Rbfox1;Rbfox1	RNA binding protein fox-1 homolog 3;Isoform 2 of RNA binding protein fox-1 homolog 3;Isoform 4 of RNA binding protein fox-1 homolog 3;Isoform 5 of RNA binding protein fox-1 homolog 3;RNA binding protein fox-1 homolog 2;Isoform 2 of RNA binding protein fox-1 homolog 2;Isoform 3 of RNA binding protein fox-1 homolog 2;Isoform 5 of RNA binding protein fox-1 homolog 2;Isoform 6 of RNA binding protein …	RFOX3_MOUSE;RFOX3_MOUSE;RFOX3_MOUSE;RFOX3_MOUSE;RFOX2_MOUSE;RFOX2_MOUSE;RFOX2_MOUSE;RFOX2_MOUSE;RFOX2_MOUSE;RFOX2_MOUSE;RFOX2_MOUSE;RFOX1_MOUSE;RFOX1_MOUSE;RFOX1_MOUSE;RFOX1_MOUSE;RFOX1_MOUSE;RFOX1_MOUSE
Q8BIJ6	Iars2	Isoleucine--tRNA ligase, mitochondrial	SYIM_MOUSE
Q8BIK4;Q8BIK4-2	Dock9	Dedicator of cytokinesis protein 9;Isoform 2 of Dedicator of cytokinesis protein 9	DOCK9_MOUSE
Q8BIQ5;Q8BIQ5-2	Cstf2	Cleavage stimulation factor subunit 2;Isoform 2 of Cleavage stimulation factor subunit 2	CSTF2_MOUSE
Q8BIW1	Prune1	Exopolyphosphatase PRUNE1	PRUN1_MOUSE
Q8BIZ1	Anks1b	Ankyrin repeat and sterile alpha motif domain-containing protein 1B	ANS1B_MOUSE
Q8BJ03;Q8BJ03-2	Cox15	Cytochrome c oxidase assembly protein COX15 homolog;Isoform 2 of Cytochrome c oxidase assembly protein COX15 homolog	COX15_MOUSE
Q8BJH1	Zc2hc1a	Zinc finger C2HC domain-containing protein 1A	ZC21A_MOUSE
Q8BJI1	Slc6a17	Sodium-dependent neutral amino acid transporter SLC6A17	S6A17_MOUSE
Q8BJS4;Q8BJS4-2;Q8BJS4-3	Sun2	SUN domain-containing protein 2;Isoform 2 of SUN domain-containing protein 2;Isoform 3 of SUN domain-containing protein 2	SUN2_MOUSE
Q8BJU0;Q8BJU0-2	Sgta	Small glutamine-rich tetratricopeptide repeat-containing protein alpha;Isoform 2 of Small glutamine-rich tetratricopeptide repeat-containing protein alpha	SGTA_MOUSE
Q8BJY1	Psmd5	26S proteasome non-ATPase regulatory subunit 5	PSMD5_MOUSE
Q8BK08	Tmem11	Transmembrane protein 11, mitochondrial	TMM11_MOUSE
Q8BK30	Ndufv3	NADH dehydrogenase [ubiquinone] flavoprotein 3, mitochondrial	NDUV3_MOUSE
Q8BK63;Q8BK63-2	Csnk1a1	Casein kinase I isoform alpha;Isoform 2 of Casein kinase I isoform alpha	KC1A_MOUSE
Q8BK64	Ahsa1	Activator of 90 kDa heat shock protein ATPase homolog 1	AHSA1_MOUSE
Q8BKC5	Ipo5	Importin-5	IPO5_MOUSE
Q8BKC8-2	Pi4kb	Isoform 2 of Phosphatidylinositol 4-kinase beta	PI4KB_MOUSE
Q8BKX1;Q8BKX1-2;Q8BKX1-3;Q8BKX1-4	Baiap2	Brain-specific angiogenesis inhibitor 1-associated protein 2;Isoform 2 of Brain-specific angiogenesis inhibitor 1-associated protein 2;Isoform 3 of Brain-specific angiogenesis inhibitor 1-associated protein 2;Isoform 4 of Brain-specific angiogenesis inhibitor 1-associated protein 2	BAIP2_MOUSE
Q8BKZ9	Pdhx	Pyruvate dehydrogenase protein X component, mitochondrial	ODPX_MOUSE
Q8BL03	Slc25a29	Mitochondrial basic amino acids transporter	MCATL_MOUSE
Q8BL65	Ablim2	Actin-binding LIM protein 2	ABLM2_MOUSE
Q8BL66	Eea1	Early endosome antigen 1	EEA1_MOUSE
Q8BLE7	Slc17a6	Vesicular glutamate transporter 2	VGLU2_MOUSE
Q8BLF1	Nceh1	Neutral cholesterol ester hydrolase 1	NCEH1_MOUSE
Q8BLJ3	Plcxd3	PI-PLC X domain-containing protein 3	PLCX3_MOUSE
Q8BLK3	Lsamp	Limbic system-associated membrane protein	LSAMP_MOUSE
Q8BLQ9;Q8BLQ9-2;Q8BLQ9-3	Cadm2	Cell adhesion molecule 2;Isoform 2 of Cell adhesion molecule 2;Isoform 3 of Cell adhesion molecule 2	CADM2_MOUSE
Q8BLR2	Cpne4	Copine-4	CPNE4_MOUSE
Q8BLV3;Q8BLV3-2	Slc9a7	Sodium/hydrogen exchanger 7;Isoform 2 of Sodium/hydrogen exchanger 7	SL9A7_MOUSE
Q8BLX4	Slc35c1	GDP-fucose transporter 1	FUCT1_MOUSE
Q8BM65;Q8BM65-2;Q8BM65-3;Q8BM65-4;Q8BM65-5	Nyap2	Neuronal tyrosine-phosphorylated phosphoinositide-3-kinase adapter 2;Isoform 2 of Neuronal tyrosine-phosphorylated phosphoinositide-3-kinase adapter 2;Isoform 3 of Neuronal tyrosine-phosphorylated phosphoinositide-3-kinase adapter 2;Isoform 4 of Neuronal tyrosine-phosphorylated phosphoinositide-3-kinase adapter 2;Isoform 5 of Neuronal tyrosine-phosphorylated phosphoinositide-3-kinase adapter 2	NYAP2_MOUSE
Q8BM72	Hspa13	Heat shock 70 kDa protein 13	HSP13_MOUSE
Q8BM88	Ctso	Cathepsin O	CATO_MOUSE
Q8BMA6	Srp68	Signal recognition particle subunit SRP68	SRP68_MOUSE
Q8BMF3	Me3	NADP-dependent malic enzyme, mitochondrial	MAON_MOUSE
Q8BMF4	Dlat	Dihydrolipoyllysine-residue acetyltransferase component of pyruvate dehydrogenase complex, mitochondrial	ODP2_MOUSE
Q8BMG7	Rab3gap2	Rab3 GTPase-activating protein non-catalytic subunit	RBGPR_MOUSE
Q8BMI3	Gga3	ADP-ribosylation factor-binding protein GGA3	GGA3_MOUSE
Q8BMK4	Ckap4	Cytoskeleton-associated protein 4	CKAP4_MOUSE
Q8BMP6	Acbd3	Golgi resident protein GCP60	GCP60_MOUSE
Q8BMS1	Hadha	Trifunctional enzyme subunit alpha, mitochondrial	ECHA_MOUSE
Q8BNI4	Derl2	Derlin-2	DERL2_MOUSE
Q8BNW9	Kbtbd11	Kelch repeat and BTB domain-containing protein 11	KBTBB_MOUSE
Q8BNY6	Ncs1	Neuronal calcium sensor 1	NCS1_MOUSE
Q8BP00;Q8BP00-2	Iqcb1	IQ calmodulin-binding motif-containing protein 1;Isoform 2 of IQ calmodulin-binding motif-containing protein 1	IQCB1_MOUSE
Q8BP47	NARS1	Asparagine--tRNA ligase, cytoplasmic	SYNC_MOUSE
Q8BP67	Rpl24	60S ribosomal protein L24	RL24_MOUSE
Q8BP92	Rcn2	Reticulocalbin-2	RCN2_MOUSE
Q8BPN8;Q8BPN8-2	Dmxl2	DmX-like protein 2;Isoform 2 of DmX-like protein 2	DMXL2_MOUSE
Q8BPQ7	Sgsm1	Small G protein signaling modulator 1	SGSM1_MOUSE
Q8BQP9	Rgs7bp	Regulator of G-protein signaling 7-binding protein	R7BP_MOUSE
Q8BQZ4	Ralgapb	Ral GTPase-activating protein subunit beta	RLGPB_MOUSE
Q8BR63	Fam177a1	Protein FAM177A1	F177A_MOUSE
Q8BR70	Yipf6	Protein YIPF6	YIPF6_MOUSE
Q8BR90;Q8BR90-2	Unknown	UPF0600 protein C5orf51 homolog;Isoform 2 of UPF0600 protein C5orf51 homolog	CE051_MOUSE
Q8BR92	Palm2	Paralemmin-2	PALM2_MOUSE
Q8BRF7;Q8BRF7-3	Scfd1	Sec1 family domain-containing protein 1;Isoform 3 of Sec1 family domain-containing protein 1	SCFD1_MOUSE
Q8BRJ3	Rell2	RELT-like protein 2	RELL2_MOUSE
Q8BRK8	Prkaa2	5'-AMP-activated protein kinase catalytic subunit alpha-2	AAPK2_MOUSE
Q8BRT1	Clasp2	CLIP-associating protein 2	CLAP2_MOUSE
Q8BRU6	Slc18a2	Synaptic vesicular amine transporter	VMAT2_MOUSE
Q8BRV5	Kiaa1671	Uncharacterized protein KIAA1671	K1671_MOUSE
Q8BS95	Gpr89a	Golgi pH regulator	GPHR_MOUSE
Q8BSK8;Q8BSK8-2	Rps6kb1	Ribosomal protein S6 kinase beta-1;Isoform Alpha II of Ribosomal protein S6 kinase beta-1	KS6B1_MOUSE
Q8BSL7	Arf2	ADP-ribosylation factor 2	ARF2_MOUSE
Q8BSS9	Ppfia2	Liprin-alpha-2	LIPA2_MOUSE
Q8BSY0	Asph	Aspartyl/asparaginyl beta-hydroxylase	ASPH_MOUSE
Q8BT60	Cpne3	Copine-3	CPNE3_MOUSE
Q8BTG3	Tcp11l1	T-complex protein 11-like protein 1	T11L1_MOUSE
Q8BTG7;Q8BTG7-3	Ndrg4	Protein NDRG4;Isoform 3 of Protein NDRG4	NDRG4_MOUSE
Q8BTI8;Q8BTI8-2;Q8BTI8-3	Srrm2	Serine/arginine repetitive matrix protein 2;Isoform 2 of Serine/arginine repetitive matrix protein 2;Isoform 3 of Serine/arginine repetitive matrix protein 2	SRRM2_MOUSE
Q8BTM8	Flna	Filamin-A	FLNA_MOUSE
Q8BTX9	Hsdl1	Inactive hydroxysteroid dehydrogenase-like protein 1	HSDL1_MOUSE
Q8BU31	Rap2c	Ras-related protein Rap-2c	RAP2C_MOUSE
Q8BUK6	Hook3	Protein Hook homolog 3	HOOK3_MOUSE
Q8BUL6;Q8BUL6-2	Plekha1	Pleckstrin homology domain-containing family A member 1;Isoform 2 of Pleckstrin homology domain-containing family A member 1	PKHA1_MOUSE
Q8BUV3	Gphn	Gephyrin	GEPH_MOUSE
Q8BVA2	Tmem222	Transmembrane protein 222	TM222_MOUSE
Q8BVE3	Atp6v1h	V-type proton ATPase subunit H	VATH_MOUSE
Q8BVG8	Nat14	N-acetyltransferase 14	NAT14_MOUSE
Q8BVI4	Qdpr	Dihydropteridine reductase	DHPR_MOUSE
Q8BVI5	Stx16	Syntaxin-16	STX16_MOUSE
Q8BVQ5	Ppme1	Protein phosphatase methylesterase 1	PPME1_MOUSE
Q8BW22	Ss18l1	Calcium-responsive transactivator	CREST_MOUSE
Q8BW41;Q8BW41-2	Pomgnt2	Protein O-linked-mannose beta-1,4-N-acetylglucosaminyltransferase 2;Isoform 2 of Protein O-linked-mannose beta-1,4-N-acetylglucosaminyltransferase 2	PMGT2_MOUSE
Q8BW75	Maob	Amine oxidase [flavin-containing] B	AOFB_MOUSE
Q8BWF0	Aldh5a1	Succinate-semialdehyde dehydrogenase, mitochondrial	SSDH_MOUSE
Q8BWM0	Ptges2	Prostaglandin E synthase 2	PGES2_MOUSE
Q8BWR2	Pithd1	PITH domain-containing protein 1	PITH1_MOUSE
Q8BWS5	Gprin3	G protein-regulated inducer of neurite outgrowth 3	GRIN3_MOUSE
Q8BWT1	Acaa2	3-ketoacyl-CoA thiolase, mitochondrial	THIM_MOUSE
Q8BWT5	Dip2a	Disco-interacting protein 2 homolog A	DIP2A_MOUSE
Q8BWY3	Etf1	Eukaryotic peptide chain release factor subunit 1	ERF1_MOUSE
Q8BWY7;Q8BWY7-2;Q8BWY7-3	Slc39a11	Zinc transporter ZIP11;Isoform 2 of Zinc transporter ZIP11;Isoform 3 of Zinc transporter ZIP11	S39AB_MOUSE
Q8BX70;Q8BX70-2;Q8BX70-3	Vps13c	Vacuolar protein sorting-associated protein 13C;Isoform 2 of Vacuolar protein sorting-associated protein 13C;Isoform 3 of Vacuolar protein sorting-associated protein 13C	VP13C_MOUSE
Q8BX94	Osbpl2	Oxysterol-binding protein-related protein 2	OSBL2_MOUSE
Q8BXA5	Clptm1l	Cleft lip and palate transmembrane protein 1-like protein	CLP1L_MOUSE
Q8BXK8	Agap1	Arf-GAP with GTPase, ANK repeat and PH domain-containing protein 1	AGAP1_MOUSE
Q8BXQ2	Pigt	GPI transamidase component PIG-T	PIGT_MOUSE
Q8BXR1	Slc7a14	Probable cationic amino acid transporter	S7A14_MOUSE
Q8BXZ1	Tmx3	Protein disulfide-isomerase TMX3	TMX3_MOUSE
Q8BY87;Q8BY87-2	Usp47	Ubiquitin carboxyl-terminal hydrolase 47;Isoform 2 of Ubiquitin carboxyl-terminal hydrolase 47	UBP47_MOUSE
Q8BY89;Q8BY89-2	Slc44a2	Choline transporter-like protein 2;Isoform 2 of Choline transporter-like protein 2	CTL2_MOUSE
Q8BYB9	Poglut1	Protein O-glucosyltransferase 1	PGLT1_MOUSE
Q8BYC6	Taok3	Serine/threonine-protein kinase TAO3	TAOK3_MOUSE
Q8BYI9	Tnr	Tenascin-R	TENR_MOUSE
Q8BYK6;Q8BYK6-3	Ythdf3	YTH domain-containing family protein 3;Isoform 3 of YTH domain-containing family protein 3	YTHD3_MOUSE
Q8BYR5-2;Q8BYR5-3	Cadps2	Isoform 2 of Calcium-dependent secretion activator 2;Isoform 3 of Calcium-dependent secretion activator 2	CAPS2_MOUSE
Q8BYW9	Eogt	EGF domain-specific O-linked N-acetylglucosamine transferase	EOGT_MOUSE
Q8BZ98;Q8BZ98-2	Dnm3	Dynamin-3;Isoform 2 of Dynamin-3	DYN3_MOUSE
Q8BZA7	Gpr26	G-protein coupled receptor 26	GPR26_MOUSE
Q8BZA9	Tigar	Fructose-2,6-bisphosphatase TIGAR	TIGAR_MOUSE
Q8BZM1	Glmn	Glomulin	GLMN_MOUSE
Q8BZZ3;Q8C863	Wwp1;Itch	NEDD4-like E3 ubiquitin-protein ligase WWP1;E3 ubiquitin-protein ligase Itchy	WWP1_MOUSE;ITCH_MOUSE
Q8C025	Chpt1	Cholinephosphotransferase 1	CHPT1_MOUSE
Q8C052	Map1s	Microtubule-associated protein 1S	MAP1S_MOUSE
Q8C079;Q8C079-3;Q8C079-4;Q8C9H6;Q8C9H6-3;Q8C9H6-4	Strip1;Strip1;Strip1;Strip2;Strip2;Strip2	Striatin-interacting protein 1;Isoform 3 of Striatin-interacting protein 1;Isoform 4 of Striatin-interacting protein 1;Striatin-interacting proteins 2;Isoform 3 of Striatin-interacting proteins 2;Isoform 2 of Striatin-interacting proteins 2	STRP1_MOUSE;STRP1_MOUSE;STRP1_MOUSE;STRP2_MOUSE;STRP2_MOUSE;STRP2_MOUSE
Q8C080	Snx16	Sorting nexin-16	SNX16_MOUSE
Q8C0D4	Arhgap12	Rho GTPase-activating protein 12	RHG12_MOUSE
Q8C0D7;Q8C0D7-2;Q8C0D7-3;Q8C0D7-4;Q8C0D7-5;Q9D8Y8;Q9D8Y8-2	Ing4;Ing4;Ing4;Ing4;Ing4;Ing5;Ing5	Inhibitor of growth protein 4;Isoform 2 of Inhibitor of growth protein 4;Isoform 3 of Inhibitor of growth protein 4;Isoform 4 of Inhibitor of growth protein 4;Isoform 5 of Inhibitor of growth protein 4;Inhibitor of growth protein 5;Isoform 2 of Inhibitor of growth protein 5	ING4_MOUSE;ING4_MOUSE;ING4_MOUSE;ING4_MOUSE;ING4_MOUSE;ING5_MOUSE;ING5_MOUSE
Q8C0E2	Vps26b	Vacuolar protein sorting-associated protein 26B	VP26B_MOUSE
Q8C0L0	Tmx4	Thioredoxin-related transmembrane protein 4	TMX4_MOUSE
Q8C0M9	Asrgl1	Isoaspartyl peptidase/L-asparaginase	ASGL1_MOUSE
Q8C0P5	Coro2a	Coronin-2A	COR2A_MOUSE
Q8C0T5;Q8C0T5-2	Sipa1l1	Signal-induced proliferation-associated 1-like protein 1;Isoform 2 of Signal-induced proliferation-associated 1-like protein 1	SI1L1_MOUSE
Q8C0Y0;Q8C0Y0-2;Q8C0Y0-3	Ppp4r4	Serine/threonine-protein phosphatase 4 regulatory subunit 4;Isoform 2 of Serine/threonine-protein phosphatase 4 regulatory subunit 4;Isoform 3 of Serine/threonine-protein phosphatase 4 regulatory subunit 4	PP4R4_MOUSE
Q8C129	Lnpep	Leucyl-cystinyl aminopeptidase	LCAP_MOUSE
Q8C145	Slc39a6	Zinc transporter ZIP6	S39A6_MOUSE
Q8C166	Cpne1	Copine-1	CPNE1_MOUSE
Q8C167;Q8C167-2	Prepl	Prolyl endopeptidase-like;Isoform 2 of Prolyl endopeptidase-like	PPCEL_MOUSE
Q8C1A5	Thop1	Thimet oligopeptidase	THOP1_MOUSE
Q8C1B1;Q8C1B1-2	Camsap2	Calmodulin-regulated spectrin-associated protein 2;Isoform 2 of Calmodulin-regulated spectrin-associated protein 2	CAMP2_MOUSE
Q8C1B7;Q8C1B7-2;Q8C1B7-3	Septin11	Septin-11;Isoform 2 of Septin-11;Isoform 3 of Septin-11	SEP11_MOUSE
Q8C1M2	Znf428	Zinc finger protein 428	ZN428_MOUSE
Q8C3B8	Rft1	Protein RFT1 homolog	RFT1_MOUSE
Q8C3F2;Q8C3F2-2;Q8C3F2-3	Fam120c	Constitutive coactivator of PPAR-gamma-like protein 2;Isoform 2 of Constitutive coactivator of PPAR-gamma-like protein 2;Isoform 3 of Constitutive coactivator of PPAR-gamma-like protein 2	F120C_MOUSE
Q8C3X8	Lmf2	Lipase maturation factor 2	LMF2_MOUSE
Q8C419	Gpr158	Probable G-protein coupled receptor 158	GP158_MOUSE
Q8C437;Q8C437-3	Pex5l	PEX5-related protein;Isoform 3 of PEX5-related protein	PEX5R_MOUSE
Q8C460;Q8C460-2	Eri3	ERI1 exoribonuclease 3;Isoform 2 of ERI1 exoribonuclease 3	ERI3_MOUSE
Q8C4U3	Sfrp1	Secreted frizzled-related protein 1	SFRP1_MOUSE
Q8C522	Endod1	Endonuclease domain-containing 1 protein	ENDD1_MOUSE
Q8C561;Q8C561-2;Q8C561-3	Lmbrd2	G-protein coupled receptor-associated protein LMBRD2;Isoform 2 of G-protein coupled receptor-associated protein LMBRD2;Isoform 3 of G-protein coupled receptor-associated protein LMBRD2	LMBD2_MOUSE
Q8C5L6	Inpp5k	Inositol polyphosphate 5-phosphatase K	INP5K_MOUSE
Q8C5P7	Tdrp	Testis development-related protein	TDRP_MOUSE
Q8C5Q4	Grsf1	G-rich sequence factor 1	GRSF1_MOUSE
Q8C5W3;Q8C5W3-2	Tbcel	Tubulin-specific chaperone cofactor E-like protein;Isoform 2 of Tubulin-specific chaperone cofactor E-like protein	TBCEL_MOUSE
Q8C6E0	Cfap36	Cilia- and flagella-associated protein 36	CFA36_MOUSE
Q8C729;Q8C729-2	Fam126b	Protein FAM126B;Isoform 2 of Protein FAM126B	F126B_MOUSE
Q8C7D2;Q8C7D2-2;Q8C7D2-3	Crbn	Protein cereblon;Isoform 2 of Protein cereblon;Isoform 3 of Protein cereblon	CRBN_MOUSE
Q8C7K6	Pcyox1l	Prenylcysteine oxidase-like	PCYXL_MOUSE
Q8C7M3;Q8C7M3-2;Q8C7M3-3;Q8C7M3-4;Q8C7M3-5;Q8C7M3-6	Trim9	E3 ubiquitin-protein ligase TRIM9;Isoform 2 of E3 ubiquitin-protein ligase TRIM9;Isoform 3 of E3 ubiquitin-protein ligase TRIM9;Isoform 4 of E3 ubiquitin-protein ligase TRIM9;Isoform 5 of E3 ubiquitin-protein ligase TRIM9;Isoform 6 of E3 ubiquitin-protein ligase TRIM9	TRIM9_MOUSE
Q8C7R4	Uba6	Ubiquitin-like modifier-activating enzyme 6	UBA6_MOUSE
Q8C7X2-2	Emc1	Isoform 2 of ER membrane protein complex subunit 1	EMC1_MOUSE
Q8C878	Uba3	NEDD8-activating enzyme E1 catalytic subunit	UBA3_MOUSE
Q8C8N2	Scai	Protein SCAI	SCAI_MOUSE
Q8C8R3-2	Ank2	Isoform 2 of Ankyrin-2	ANK2_MOUSE
Q8C8R3-4	Ank2	Isoform 4 of Ankyrin-2	ANK2_MOUSE
Q8C8R3-7	Ank2	Isoform 7 of Ankyrin-2	ANK2_MOUSE
Q8C8T7	Elfn1	Protein ELFN1	ELFN1_MOUSE
Q8C8T8	Tsr2	Pre-rRNA-processing protein TSR2 homolog	TSR2_MOUSE
Q8C996	Tmem163	Transmembrane protein 163	TM163_MOUSE
Q8CA95;Q8CA95-2;Q8CA95-3	Pde10a	cAMP and cAMP-inhibited cGMP 3',5'-cyclic phosphodiesterase 10A;Isoform 2 of cAMP and cAMP-inhibited cGMP 3',5'-cyclic phosphodiesterase 10A;Isoform 3 of cAMP and cAMP-inhibited cGMP 3',5'-cyclic phosphodiesterase 10A	PDE10_MOUSE
Q8CAA7	Pgm2l1	Glucose 1,6-bisphosphate synthase	PGM2L_MOUSE
Q8CAB8	Castor2	Cytosolic arginine sensor for mTORC1 subunit 2	CAST2_MOUSE
Q8CAQ8-2	Immt	Isoform 2 of MICOS complex subunit Mic60	MIC60_MOUSE
Q8CAY6	Acat2	Acetyl-CoA acetyltransferase, cytosolic	THIC_MOUSE
Q8CBC4	Cnst	Consortin	CNST_MOUSE
Q8CBE3	Wdr37	WD repeat-containing protein 37	WDR37_MOUSE
Q8CBH5-2	Mfsd6	Isoform 2 of Major facilitator superfamily domain-containing protein 6	MFSD6_MOUSE
Q8CBW3;Q8CBW3-2;Q8CBW3-3;Q8CBW3-4	Abi1	Abl interactor 1;Isoform 2 of Abl interactor 1;Isoform 3 of Abl interactor 1;Isoform 4 of Abl interactor 1	ABI1_MOUSE
Q8CBY8;Q8CBY8-2	Dctn4	Dynactin subunit 4;Isoform 2 of Dynactin subunit 4	DCTN4_MOUSE
Q8CC21;Q8CC21-2	Ttc19	Tetratricopeptide repeat protein 19, mitochondrial;Isoform 2 of Tetratricopeptide repeat protein 19, mitochondrial	TTC19_MOUSE
Q8CC27;Q8CC27-2;Q8CC27-3;Q8CC27-4	Cacnb2	Voltage-dependent L-type calcium channel subunit beta-2;Isoform 2 of Voltage-dependent L-type calcium channel subunit beta-2;Isoform 3 of Voltage-dependent L-type calcium channel subunit beta-2;Isoform 4 of Voltage-dependent L-type calcium channel subunit beta-2	CACB2_MOUSE
Q8CC35;Q8CC35-2;Q8CC35-3	Synpo	Synaptopodin;Isoform 2 of Synaptopodin;Isoform 3 of Synaptopodin	SYNPO_MOUSE
Q8CCJ4	Amer2	APC membrane recruitment protein 2	AMER2_MOUSE
Q8CCK0	Macroh2a2	Core histone macro-H2A.2	H2AW_MOUSE
Q8CCN5	Bcas3	Breast carcinoma-amplified sequence 3 homolog	BCAS3_MOUSE
Q8CCT4	Tceal5	Transcription elongation factor A protein-like 5	TCAL5_MOUSE
Q8CD26	Slc35e1	Solute carrier family 35 member E1	S35E1_MOUSE
Q8CDA1	Inpp5f	Phosphatidylinositide phosphatase SAC2	SAC2_MOUSE
Q8CDC0	Serpinb13	Serpin B13	SPB13_MOUSE
Q8CDN6	Txnl1	Thioredoxin-like protein 1	TXNL1_MOUSE
Q8CE08;Q8CE08-2	Acp3	Prostatic acid phosphatase;Isoform 2 of Prostatic acid phosphatase	PPAP_MOUSE
Q8CE50	Snx30	Sorting nexin-30	SNX30_MOUSE
Q8CES0	Naa30	N-alpha-acetyltransferase 30	NAA30_MOUSE
Q8CF89	Tab1	TGF-beta-activated kinase 1 and MAP3K7-binding protein 1	TAB1_MOUSE
Q8CFI0;Q8CFI0-2;Q8CFI0-3	Nedd4l	E3 ubiquitin-protein ligase NEDD4-like;Isoform 2 of E3 ubiquitin-protein ligase NEDD4-like;Isoform 3 of E3 ubiquitin-protein ligase NEDD4-like	NED4L_MOUSE
Q8CFP6	Dnajc27	DnaJ homolog subfamily C member 27	DJC27_MOUSE
Q8CFX1	H6pd	GDH/6PGL endoplasmic bifunctional protein	G6PE_MOUSE
Q8CFY5	Cox10	Protoheme IX farnesyltransferase, mitochondrial	COX10_MOUSE
Q8CGA0	Ppm1f	Protein phosphatase 1F	PPM1F_MOUSE
Q8CGA3	Slc43a2	Large neutral amino acids transporter small subunit 4	LAT4_MOUSE
Q8CGC7	Eprs1	Bifunctional glutamate/proline--tRNA ligase	SYEP_MOUSE
Q8CGF5	Tlcd4	TLC domain-containing protein 4	TLCD4_MOUSE
Q8CGF6	Wdr47	WD repeat-containing protein 47	WDR47_MOUSE
Q8CGK3	Lonp1	Lon protease homolog, mitochondrial	LONM_MOUSE
Q8CGK7	Gnal	Guanine nucleotide-binding protein G(olf) subunit alpha	GNAL_MOUSE
Q8CGQ8;Q8CGQ8-2	Slc24a4	Sodium/potassium/calcium exchanger 4;Isoform 2 of Sodium/potassium/calcium exchanger 4	NCKX4_MOUSE
Q8CGY8-2	Ogt	Isoform 2 of UDP-N-acetylglucosamine--peptide N-acetylglucosaminyltransferase 110 kDa subunit	OGT1_MOUSE
Q8CH72	Trim32	E3 ubiquitin-protein ligase TRIM32	TRI32_MOUSE
Q8CH77;Q8CH77-2	Nav1	Neuron navigator 1;Isoform 2 of Neuron navigator 1	NAV1_MOUSE
Q8CHC4	Synj1	Synaptojanin-1	SYNJ1_MOUSE
Q8CHG7	Rapgef2	Rap guanine nucleotide exchange factor 2	RPGF2_MOUSE
Q8CHH9;Q8CHH9-2	Septin8	Septin-8;Isoform 2 of Septin-8	SEPT8_MOUSE
Q8CHK3	Mboat7	Lysophospholipid acyltransferase 7	MBOA7_MOUSE
Q8CHP5;Q8CHP5-2	Pym1	Partner of Y14 and mago;Isoform 2 of Partner of Y14 and mago	PYM1_MOUSE
Q8CHP8	Pgp	Glycerol-3-phosphate phosphatase	PGP_MOUSE
Q8CHS8;Q8CHS8-3	Vps37a	Vacuolar protein sorting-associated protein 37A;Isoform 3 of Vacuolar protein sorting-associated protein 37A	VP37A_MOUSE
Q8CHT1;Q8CHT1-2	Ngef	Ephexin-1;Isoform 2 of Ephexin-1	NGEF_MOUSE
Q8CHU3;Q8CHU3-2	Epn2	Epsin-2;Isoform 2 of Epsin-2	EPN2_MOUSE
Q8CI08;Q8CI08-2	Slain2	SLAIN motif-containing protein 2;Isoform 2 of SLAIN motif-containing protein 2	SLAI2_MOUSE
Q8CI51	Pdlim5	PDZ and LIM domain protein 5	PDLI5_MOUSE
Q8CI61	Bag4	BAG family molecular chaperone regulator 4	BAG4_MOUSE
Q8CI71	Vps50	Syndetin	VPS50_MOUSE
Q8CI94	Pygb	Glycogen phosphorylase, brain form	PYGB_MOUSE
Q8CIA5	Slc35b4	UDP-xylose and UDP-N-acetylglucosamine transporter	S35B4_MOUSE
Q8CIB5	Fermt2	Fermitin family homolog 2	FERM2_MOUSE
Q8CIB6	Tmem230	Transmembrane protein 230	TM230_MOUSE
Q8CIG8	Prmt5	Protein arginine N-methyltransferase 5	ANM5_MOUSE
Q8CIN4	Pak2	Serine/threonine-protein kinase PAK 2	PAK2_MOUSE
Q8CIP4;Q8CIP4-2	Mark4	MAP/microtubule affinity-regulating kinase 4;Isoform 2 of MAP/microtubule affinity-regulating kinase 4	MARK4_MOUSE
Q8CIQ7	Dock3	Dedicator of cytokinesis protein 3	DOCK3_MOUSE
Q8CJ19	Mical3	[F-actin]-monooxygenase MICAL3	MICA3_MOUSE
Q8CJG0;Q8CJG1	Ago2;Ago1	Protein argonaute-2;Protein argonaute-1	AGO2_MOUSE;AGO1_MOUSE
Q8CJH3	Plxnb1	Plexin-B1	PLXB1_MOUSE
Q8HW98	Iglon5	IgLON family member 5	IGLO5_MOUSE
Q8JZK9	Hmgcs1	Hydroxymethylglutaryl-CoA synthase, cytoplasmic	HMCS1_MOUSE
Q8JZP2	Syn3	Synapsin-3	SYN3_MOUSE
Q8JZQ2	Afg3l2	AFG3-like protein 2	AFG32_MOUSE
Q8JZR6;Q8JZR6-2	Slc4a8	Electroneutral sodium bicarbonate exchanger 1;Isoform 2 of Electroneutral sodium bicarbonate exchanger 1	S4A8_MOUSE
Q8JZS0	Lin7a	Protein lin-7 homolog A	LIN7A_MOUSE
Q8JZU2	Slc25a1	Tricarboxylate transport protein, mitochondrial	TXTP_MOUSE
Q8JZW8	Pnma3	Paraneoplastic antigen Ma3 homolog	PNMA3_MOUSE
Q8K004	Spata2	Spermatogenesis-associated protein 2	SPAT2_MOUSE
Q8K012;Q8K012-2	Fnbp1l	Formin-binding protein 1-like;Isoform 2 of Formin-binding protein 1-like	FBP1L_MOUSE
Q8K021	Scamp1	Secretory carrier-associated membrane protein 1	SCAM1_MOUSE
Q8K070	Samd14	Sterile alpha motif domain-containing protein 14	SAM14_MOUSE
Q8K097;Q8K097-2	Faim2	Protein lifeguard 2;Isoform 2 of Protein lifeguard 2	LFG2_MOUSE
Q8K0C4	Cyp51a1	Lanosterol 14-alpha demethylase	CP51A_MOUSE
Q8K0C9	Gmds	GDP-mannose 4,6 dehydratase	GMDS_MOUSE
Q8K0D7	Get1	Guided entry of tail-anchored proteins factor 1	GET1_MOUSE
Q8K0G5	Eipr1	EARP and GARP complex-interacting protein 1	EIPR1_MOUSE
Q8K0S0	Phyhip	Phytanoyl-CoA hydroxylase-interacting protein	PHYIP_MOUSE
Q8K0T0	Rtn1	Reticulon-1	RTN1_MOUSE
Q8K0T4	Katnal1	Katanin p60 ATPase-containing subunit A-like 1	KATL1_MOUSE
Q8K0U4	Hspa12a	Heat shock 70 kDa protein 12A	HS12A_MOUSE
Q8K0X8	Fez1	Fasciculation and elongation protein zeta-1	FEZ1_MOUSE
Q8K183	Pdxk	Pyridoxal kinase	PDXK_MOUSE
Q8K1A5	Tmem41b	Transmembrane protein 41B	TM41B_MOUSE
Q8K1M6	Dnm1l	Dynamin-1-like protein	DNM1L_MOUSE
Q8K1X1	Wdr11	WD repeat-containing protein 11	WDR11_MOUSE
Q8K209	Adgrg1	Adhesion G-protein coupled receptor G1	AGRG1_MOUSE
Q8K212	Pacs1	Phosphofurin acidic cluster sorting protein 1	PACS1_MOUSE
Q8K221	Arfip2	Arfaptin-2	ARFP2_MOUSE
Q8K245	Uvrag	UV radiation resistance-associated protein	UVRAG_MOUSE
Q8K274	Fn3krp	Ketosamine-3-kinase	KT3K_MOUSE
Q8K297	Colgalt1	Procollagen galactosyltransferase 1	GT251_MOUSE
Q8K2B3	Sdha	Succinate dehydrogenase [ubiquinone] flavoprotein subunit, mitochondrial	SDHA_MOUSE
Q8K2C9	Hacd3	Very-long-chain (3R)-3-hydroxyacyl-CoA dehydratase 3	HACD3_MOUSE
Q8K2I1	Fntb	Protein farnesyltransferase subunit beta	FNTB_MOUSE
Q8K2K6;Q8K2K6-1;Q8K2K6-3	Agfg1	Arf-GAP domain and FG repeat-containing protein 1;Isoform 1 of Arf-GAP domain and FG repeat-containing protein 1;Isoform 3 of Arf-GAP domain and FG repeat-containing protein 1	AGFG1_MOUSE
Q8K2L8	Trappc12	Trafficking protein particle complex subunit 12	TPC12_MOUSE
Q8K310	Matr3	Matrin-3	MATR3_MOUSE
Q8K341;Q8K341-3;Q8K341-4	Atat1	Alpha-tubulin N-acetyltransferase 1;Isoform 3 of Alpha-tubulin N-acetyltransferase 1;Isoform 4 of Alpha-tubulin N-acetyltransferase 1	ATAT_MOUSE
Q8K353	Cystm1	Cysteine-rich and transmembrane domain-containing protein 1	CYTM1_MOUSE
Q8K358	Pigu	Phosphatidylinositol glycan anchor biosynthesis class U protein	PIGU_MOUSE
Q8K394	Plcl2	Inactive phospholipase C-like protein 2	PLCL2_MOUSE
Q8K3E5	Ahi1	Jouberin	AHI1_MOUSE
Q8K3H0	Appl1	DCC-interacting protein 13-alpha	DP13A_MOUSE
Q8K3I4	Myrip	Rab effector MyRIP	MYRIP_MOUSE
Q8K3J1	Ndufs8	NADH dehydrogenase [ubiquinone] iron-sulfur protein 8, mitochondrial	NDUS8_MOUSE
Q8K3P0	Sdr9c7	Short-chain dehydrogenase/reductase family 9C member 7	DR9C7_MOUSE
Q8K400	Stxbp5	Syntaxin-binding protein 5	STXB5_MOUSE
Q8K4G5-2;Q8K4G5-4	Ablim1	Isoform 2 of Actin-binding LIM protein 1;Isoform 4 of Actin-binding LIM protein 1	ABLM1_MOUSE
Q8K4L4	Pof1b	Protein POF1B	POF1B_MOUSE
Q8K4P8;Q8K4P8-2;Q8K4P8-3;Q8K4P8-4	Hecw1	E3 ubiquitin-protein ligase HECW1;Isoform 2 of E3 ubiquitin-protein ligase HECW1;Isoform 3 of E3 ubiquitin-protein ligase HECW1;Isoform 4 of E3 ubiquitin-protein ligase HECW1	HECW1_MOUSE
Q8K4Q0	Rptor	Regulatory-associated protein of mTOR	RPTOR_MOUSE
Q8K4X7	Agpat4	1-acyl-sn-glycerol-3-phosphate acyltransferase delta	PLCD_MOUSE
Q8K4Z3	Naxe	NAD(P)H-hydrate epimerase	NNRE_MOUSE
Q8K596;Q8K596-2	Slc8a2	Sodium/calcium exchanger 2;Isoform 2 of Sodium/calcium exchanger 2	NAC2_MOUSE
Q8QZT1	Acat1	Acetyl-CoA acetyltransferase, mitochondrial	THIL_MOUSE
Q8QZV4	Stk32c	Serine/threonine-protein kinase 32C	ST32C_MOUSE
Q8QZY1	Eif3l	Eukaryotic translation initiation factor 3 subunit L	EIF3L_MOUSE
Q8R001;Q8R001-2	Mapre2	Microtubule-associated protein RP/EB family member 2;Isoform 2 of Microtubule-associated protein RP/EB family member 2	MARE2_MOUSE
Q8R010	Aimp2	Aminoacyl tRNA synthase complex-interacting multifunctional protein 2	AIMP2_MOUSE
Q8R016	Blmh	Bleomycin hydrolase	BLMH_MOUSE
Q8R050;Q8R050-2	Gspt1	Eukaryotic peptide chain release factor GTP-binding subunit ERF3A;Isoform 2 of Eukaryotic peptide chain release factor GTP-binding subunit ERF3A	ERF3A_MOUSE
Q8R081	Hnrnpl	Heterogeneous nuclear ribonucleoprotein L	HNRPL_MOUSE
Q8R0A7	Kiaa0513	Uncharacterized protein KIAA0513	K0513_MOUSE
Q8R0F3	Sumf1	Formylglycine-generating enzyme	SUMF1_MOUSE
Q8R0S2;Q8R0S2-2	Iqsec1	IQ motif and SEC7 domain-containing protein 1;Isoform 2 of IQ motif and SEC7 domain-containing protein 1	IQEC1_MOUSE
Q8R0S4;Q8R0S4-1;Q8R0S4-2	Cacnb4	Voltage-dependent L-type calcium channel subunit beta-4;Isoform 1 of Voltage-dependent L-type calcium channel subunit beta-4;Isoform 2 of Voltage-dependent L-type calcium channel subunit beta-4	CACB4_MOUSE
Q8R0W0	Eppk1	Epiplakin	EPIPL_MOUSE
Q8R0X7	Sgpl1	Sphingosine-1-phosphate lyase 1	SGPL1_MOUSE
Q8R0Y8	Slc25a42	Mitochondrial coenzyme A transporter SLC25A42	S2542_MOUSE
Q8R105	Vps37c	Vacuolar protein sorting-associated protein 37C	VP37C_MOUSE
Q8R123;Q8R123-2	Flad1	FAD synthase;Isoform 2 of FAD synthase	FAD1_MOUSE
Q8R127	Sccpdh	Saccharopine dehydrogenase-like oxidoreductase	SCPDL_MOUSE
Q8R138	Tmem119	Transmembrane protein 119	TM119_MOUSE
[truncated: 936 more rows]

## Sheet: APEX2_ProteinsLFQ
ProteinAccessions	C1VM_Control_VM_S1	C2VM_Control_VM_S2	C3VM_Control_VM_S3	C4VM_Control_VM_S4	A3VM_APEX_VM_S5	A4VM_APEX_VM_S6	A5VM_APEX_VM_S7	A6VM_APEX_VM_S8	C1MFB_Control_MFB_S9	C2MFB_Control_MFB_S10	C3MFB_Control_MFB_S11	C4MFB_Control_MFB_S12	A3MFB_APEX_MFB_S13	A4MFB_APEX_MFB_S14	A5MFB_APEX_MFB_S15	A6MFB_APEX_MFB_S16	C1Str_Control_Str_S17	C1Str_Control_Str_S18	C1Str_Control_Str_S19	C1Str_Control_Str_S20	A3Str_APEX_Str_S21	A4Str_APEX_Str_S22	A5Str_APEX_Str_S23	A6Str_APEX_Str_S24	C5P2_Control_Syn_S25	C6P2_Control_Syn_S26	C7P2_Control_Syn_S27	C8P2_Control_Syn_S28	A2P2_Apex_Syn_S29	A3P2_Apex_Syn_S30
A1L314	0	0	0	0	0	0	0	0	0	0	0	0	0	0	0	0	0	0	0	0	0	0	0	0	4051.45	4693.97	5199.33	3618.38	1101.78	808.182
A2A690;A2A690-2	0	0	0	0	1560.07	1186.33	889.893	2065.04	0	4555.29	0	2993.4	1443.91	1249.22	1083.85	1743.95	0	0	0	0	4050.61	3018.18	2891.05	3770.38	1835.06	2317.06	485.668	3148.44	1523.72	1721.17
A2A699	0	0	0	0	1931.08	1793.6	1444.75	1699.93	0	0	0	0	736.65	2012.21	1356.01	891.628	0	0	0	0	2802.09	2895.37	3091.33	2399.45	1452.06	0	1333.45	0	1212.63	1631.55
A2A8Z1;A2A8Z1-2	0	0	0	0	939.84	0	1544.56	1188.86	0	0	0	0	0	0	0	0	0	0	0	0	1193.23	1583.52	1169.89	1127.2	0	0	0	0	454.047	621.235
A2ADY9	0	0	0	0	790.581	905.127	1046.18	696.411	0	0	0	0	656.872	0	810.409	521.529	0	0	0	0	1739.36	1988.67	2260.62	1423.38	0	0	0	0	788.75	1005.45
A2AG50	0	0	0	0	6262.15	6770.6	4913.4	5947.69	0	0	0	0	12583.6	12273.5	10516.8	7354.42	0	0	0	0	2789.49	3044.94	2997.95	2297.41	0	0	0	0	663.956	783.891
A2AGT5;A2AGT5-2;A2AGT5-3	0	0	0	866.206	2544.55	1600.16	1029.3	2932.84	0	0	0	0	1607.73	1513.17	1268	1982.26	0	1258.58	0	0	2010.77	1733.47	1367.02	1440.51	1040.52	886.125	642.45	0	1266.27	1409.02
A2AHC3	0	0	0	0	627.469	1211.8	827.297	1382.63	0	0	0	0	973.622	0	0	2149.74	0	0	0	0	2034.87	1461.27	1393.94	1601.79	0	3513.67	0	0	954.152	885.483
A2AJA9	0	0	0	0	3869.61	2961.77	1981.9	4083.65	0	0	0	0	3056.17	7248.14	0	6370.74	0	0	0	0	2369.66	2046.58	1965.49	1922.92	10722.2	7851.19	8738.71	6433.68	2102.12	1996.86
A2AJI0	0	0	0	0	6426.71	5893.69	6009.97	6163.93	0	0	0	0	3917.24	4793.66	4147.15	4220.84	0	0	0	0	4108.7	4522.06	4208.88	3067.34	0	0	0	2685.71	3456.1	3976.52
A2AKB4	31542984	2.9591e+06	5996815	859470	911583	1.26554e+06	1.14693e+06	1.61078e+06	1.80898e+06	1.00852e+06	2781535	5529129	435673	715933	1.80276e+06	561169	23424690	3.22394e+06	35120036	18690842	14220.8	45804	184688	16902.2	3344391	2334771	1.15096e+06	2.09389e+06	14371.7	176777
A2ALS5;A2ALS5-2;A2ALS5-3	0	0	0	0	5501.37	6675.97	5942.25	6761.11	0	0	0	0	3656.78	3447.27	3181.6	3920.38	0	1832.64	0	0	6589.14	5920.05	6503.69	5289.29	0	0	0	0	2740.22	3032.92
A2ALU4;A2ALU4-2	0	0	0	0	2208.51	2750.12	2947.21	1782.25	0	0	0	0	2006.52	1617.16	1203.72	1402.38	0	0	0	0	2814.45	3039.81	3513.08	2650.92	0	0	0	0	963.687	1384.12
A2AN08;A2AN08-3;A2AN08-5	0	0	0	0	1163.42	884.896	689.261	2301.38	0	0	0	0	581.16	586.632	0	1045.38	0	0	0	0	1480.04	1345.66	935.669	1126.31	0	0	255.963	0	969.808	1220.73
A2APX8;A2APX8-2;A2APX8-3	0	4414.97	1438.96	0	1411.52	1638.74	984.383	1396.84	0	0	0	0	1281.31	872.067	1219.65	1315.91	0	0	0	0	2704.77	1963.22	1479.01	2051.15	1768.52	1081.56	1456.48	1488.64	1487.95	1528.51
A2AQ07	50108	47748.5	51016	56136.5	178421	172488	183935	181230	81920	60216.4	44131.6	73828.8	111687	97426.7	94208	104576	47572.2	39791.1	84180	43156.2	54017.2	71011.1	70943.4	49217.5	28343.5	30167.8	28184.8	32786.4	48051.1	60859
A2AQ25;A2AQ25-2;A2AQ25-3;A2AQ25-4;A2AQ25-5;A2AQ25-6;A2AQ25-8;A2AQ25-9	0	0	0	0	0	325.766	564.057	423.13	0	0	0	0	0	0	0	0	0	0	0	0	823.932	578.296	620.661	647.195	0	0	0	0	255.957	440.187
A2ARP1;A2ARP1-2;A2ARP1-3;A2ARP1-7	0	0	0	0	1121.74	1610.16	1437.29	2047.38	0	0	0	0	519.683	0	0	939.795	0	0	0	0	749.699	629.264	572.735	532.27	0	0	0	0	275.109	422.043
A2ARS0	0	0	0	0	0	0	0	0	0	2847.4	0	0	0	0	0	658	21587.2	23152.6	12072.3	0	2203.03	1774.64	1747.3	1753.06	10929.9	12264	5744.82	12555.4	3899.85	2009.75
A2AWA9	0	0	0	0	2075.73	1678.06	1227.04	2816.19	0	0	0	0	1078.96	0	0	1398.35	0	0	0	9722.53	1619.47	1563.54	1351.67	1027.29	4911.78	0	0	0	1203.21	1365.54
A2CG49;A2CG49-2;A2CG49-7	0	0	0	0	566.528	563.411	280.382	582.6	0	0	0	0	0	0	0	538.552	0	0	11963.1	0	804.974	665.729	724.631	598.884	990.192	0	0	0	761.221	583.09
A2RT62	0	0	0	0	2832.05	2807.16	2622.93	3402.79	0	0	0	0	1747.63	1268.9	1529.68	2284.9	0	4021.24	0	0	3256.64	3247.91	3454.9	3163.3	1355.73	1201.23	837.718	0	1300.54	1396.41
A3KMP2;A3KMP2-2	3449.59	4971.26	1450.73	2381.48	0	396.903	0	350.912	3173.61	4276.59	2332.7	0	1541.55	1380.2	672.197	1159.59	2073.67	2855.68	0	1593.65	490.396	544.328	376.409	499.078	2634.01	4662.84	3890.56	2330.78	985.951	1023.41
A6H5Z3	0	0	0	0	1618.35	1774.66	1266.78	2122.5	0	0	0	0	0	0	0	1168.92	0	0	0	0	1169.93	1135.1	905.512	898.481	0	0	0	0	708.328	794.082
A6H6A9	0	0	0	0	4956.56	2730.06	3516.36	2723.41	0	0	0	0	1883.82	0	0	1400.09	0	0	0	0	1011.34	558.796	746.252	795.418	0	0	0	0	987.761	588.108
B0V2N1;B0V2N1-2;B0V2N1-3;B0V2N1-4;B0V2N1-6	0	0	0	0	0	419.653	0	369.919	0	0	0	0	0	0	0	452.949	0	0	0	0	4353.17	3890.25	3738.59	3751.96	0	0	0	822.279	2362.7	2539.4
B1AUH1;B1AUH1-2	0	0	0	0	0	0	0	0	0	0	0	0	0	0	0	205.624	0	0	0	0	1384.76	1275.57	1036.86	1649.87	0	0	0	0	787.13	593.601
B1AVZ0	0	0	0	0	907.481	783.211	1353.25	902.507	0	0	0	0	0	0	0	0	0	0	0	0	0	0	0	0	0	0	0	0	0	0
B1AWN6	18387	2740.96	7654.5	0	4664.85	3312.94	2378.47	4588.54	2263.51	3940.38	1254.12	0	7161.56	7487.81	6122.1	7498.49	0	0	0	0	19170.9	15904.4	14154.5	15706.7	8957.25	7033.45	8102.39	8101.85	12223.1	13224.2
B1AXV0	0	0	0	0	0	0	1561.11	1034.04	0	0	0	0	377.641	0	0	762.735	4037.18	0	0	5225.43	362.23	146.566	197.602	146.561	8024.94	9400.59	7174.82	9497.8	2219.22	2019.29
B1AY13	0	0	0	0	1468.62	1222.31	806.782	2650.03	0	0	0	0	842.798	0	484.452	1161.91	0	0	0	0	2657.32	1964.85	1853.19	2021.49	0	451.856	0	0	1292.8	1542.57
B1AZP2;B1AZP2-2	0	0	0	0	1818.78	2252.35	2241.16	1709.8	0	0	0	0	855.337	1287.55	731.464	972.378	0	0	0	0	2698.3	3151.54	3419.9	2337.65	0	0	659.342	883.677	1016.07	1319.01
B2RSH2	4998.42	3806.38	5788.4	3621.85	5969.91	4781.78	6555.72	5611.21	7506.4	2437.98	5751.78	8738	4645.59	2937.19	5908.32	4156.29	4198.89	6055.9	5118.7	0	4949.46	5067.45	4967.38	8110.52	5493.96	5439.39	5883.05	6993.99	6115.74	5919.02
B2RUJ5;B2RUJ5-3	0	0	0	0	15760.3	11992	8768.76	12408	0	0	0	1690.72	11206.2	13116	12412.1	11172	0	0	0	0	44331.9	41706	45601.3	33468.9	1620.08	822.686	3782.36	10894.5	14484.9	18080.1
B8JK39	57341.8	100936	41594.9	60292.9	12582	9633.67	5710.18	10284.5	84290.5	120253	52214.1	71134.1	18108.5	28979.2	6457.09	28485.9	106209	87222.4	39395.8	75923.4	6629.41	5833.45	3970.89	4647.27	52896.7	78425.8	68441.2	59327.4	18671.2	13343.5
B9EJ80	0	0	0	0	3857.14	3158.89	2998.19	3819.26	0	0	0	0	3236.11	2864.62	1121.61	2179.41	0	0	0	0	2056.85	1878.04	1613.25	1421.17	2108.92	0	701.922	946.481	1018.13	1346.89
B9EJ86	0	0	0	0	3919.38	3422.64	4473.54	4413.17	0	0	0	0	1577.5	1024.25	1509.89	2072.18	0	1517.79	871.838	0	1412.26	1343.96	1483.01	1215.85	776.27	905.76	979.741	0	761.198	840.496
B9EKR1	0	0	5235.66	8691.38	27373.4	6698.21	170673	26865.5	0	8724.19	34693.8	4758.75	12069	6051.28	15570.3	4332.85	0	16550.5	0	11705.4	1240.47	1261.78	1363.01	4616.14	11607.9	16531.5	15994.2	13610.5	1412.61	2675.55
D3YVE8	0	0	6154.06	0	772.781	797.695	862.598	488.913	0	0	3836.21	0	1189.16	770.124	1874.1	681.386	0	0	0	0	2744.57	2799.98	3013.28	2934.3	1292.27	1120.87	2019.99	0	1223.37	1346.77
D3YVF0	0	0	0	0	1414.49	1008.55	1220.78	839.26	0	0	0	0	488.534	0	0	544.027	7363.29	6544.52	4200.12	4570.71	1252.43	1402.7	1130.61	802.378	7033.66	8146.51	6955.76	8113.9	2336.58	2145.15
D3YZP9	0	0	0	0	3123.67	3188.2	3085.36	2721.27	0	0	8218.98	34247.5	3458.25	4887.54	5209.1	2201.99	0	24937.7	0	0	4855.61	5670.63	5441.07	4054.3	0	3554.21	1374.56	0	1928.7	2358.21
D3YZU1	0	0	0	0	5207.02	5291.81	5703.63	3502	0	0	0	0	1166.58	0	1231.32	1728.27	0	0	0	0	938.418	1029.89	1103.51	986.044	0	0	640.662	0	516.042	582.048
D3Z4S3	0	0	0	0	0	0	0	0	0	0	0	0	0	0	0	0	0	0	0	0	1764.1	2444.16	3974.6	3562.7	871.825	0	0	0	935.184	1215.29
D3Z7P3	7070.09	7666.12	5015.45	7088.45	2234.41	2730.85	1847.84	2015.62	6903.15	11489.7	6970.98	6441.07	3175.47	3858.08	2763.99	3868.83	7188.52	8986.68	5127.06	4456.37	3844.35	3612.21	4738.96	3456.89	14337.2	15808.3	17588.9	14514.1	7763.28	6066.48
D3Z7Q2	0	0	0	0	0	0	0	0	0	0	0	0	0	0	0	0	0	0	0	0	0	0	0	5047.22	2966.34	0	0	0	1701.27	0
E9PUL5	1766.39	3028.71	2512.3	2308.73	1256.96	1655.08	1535.31	872.887	3401.53	2244.12	3177.73	2683.62	1792.52	1465.71	1305.37	1332.29	2985.68	2631.72	0	3662.28	4127.24	3273.39	2903.74	4108.49	4877.98	4025.53	3861.09	4456.62	4064.21	3392.72
E9Q0C6	0	0	0	0	3943.72	2686.8	2008.62	4489.91	0	0	0	0	3318.81	2563.13	2161.03	2930.07	0	0	0	0	5293.46	5610.17	5181.53	5216.77	0	0	0	0	2660.49	3104.04
E9Q3L2	2552.66	2458.16	3930.13	2651.28	8012.38	7430.32	5715.79	10361	2986.08	2985.43	3476.35	0	4299.79	4334.87	2866.5	5338.45	2949.02	1993.53	0	0	10988.3	9321.26	9498.86	8124.63	2134.95	2968.66	2583.24	2310.72	5360.08	6339.81
E9Q4Z2	29646.7	48569	15726.1	35093.1	5449.8	4186.67	2475.34	5506.85	26062.1	41364	18063.3	16043.3	5073.86	7352.37	2093.82	9165.98	16350.1	13491.1	6896.63	7407.67	973.291	575.731	391.277	392.154	8742.24	11428.2	10212	10510.4	2809.08	1872.58
E9Q557	1.70567e+06	106046	257058	170182	41236.4	54104.4	112312	76791.8	100012	50430.6	189581	397587	23317.3	64593.4	124400	55727.1	1.29559e+06	214187	2.80135e+06	692188	4564.9	13351.1	48420.7	23674.8	148616	97647.8	48591.6	239395	37188	26103.3
E9Q7X7	0	0	0	0	0	0	1496.75	1099.27	0	0	0	0	647.891	0	0	721.646	0	0	0	0	2575.05	2636.48	2955.72	2365.29	0	0	0	0	1045.67	1170.77
E9Q8I9;E9Q8I9-2	0	0	0	0	3820.38	2361.41	2305.61	5555.3	0	0	0	0	1595.68	1199.77	1408.73	2062.04	0	0	0	0	1988.44	1339.96	1244.56	1421.56	0	0	0	0	852.577	1023.31
F6SEU4	0	0	0	2969.47	15153.2	13041.5	9458.87	14513.9	0	2588.71	3351.41	2330.59	2955.52	1099.27	2860.15	5972.91	3906.17	4172.73	0	0	1799.19	2195.25	2068.83	1258.26	5721.8	6485.2	6115.86	5806.19	2089.48	2489.72
F8VPU2	0	0	0	0	4086.15	4065.7	4001.58	4526.63	0	0	0	65052.1	5991.85	735.944	1069.93	1312.66	0	0	0	0	252.63	286.517	192.845	194.589	5861.51	5053.78	4826.9	6048.92	1276.14	1058.76
G3X9C2	60272.2	5146.69	8902.17	8003.58	1615.09	3049.77	3053.76	3735.37	3582.1	2068.49	10334.4	14571.7	1110.72	1500.15	6010.82	7761.33	17438.9	8598.87	211986	31470.5	1020.72	1695.49	3792.8	2243.9	5406.71	5300.29	3313.22	15031.9	1425.35	1724.77
G3X9K3	0	1777.52	2197.21	1193.8	2505.51	2282.34	2214.89	3808.57	0	0	0	0	1978.53	1680.43	1941.86	2387.25	0	0	4120.9	0	4620.23	4021.34	3254.71	3620.59	0	1362.19	955.261	2323.02	2106.14	2376.07
G3XA57;G3XA57-2	0	0	0	0	884.624	1000.74	1214.78	945.988	0	0	0	0	1185.66	0	840.747	1573.11	0	0	0	0	1662.6	1715.77	2061.17	1369.34	4527.43	0	5333.92	0	1000.47	1226.76
G5E829	42189.3	6010.97	6657.48	9354.19	9645.97	11473	9697.44	11498	9870.27	12964.4	12765.1	15267.9	7061.38	9446.23	10010	8326.23	26265.2	25657.2	11150	34831.8	30744.5	28982.7	28112.4	28472.6	30533.1	26451.7	26951.9	29552.7	19288.9	20050.6
G5E897	0	0	0	0	0	0	0	0	0	0	0	0	0	0	0	0	0	0	0	0	0	0	0	0	4589.52	4770.43	3586.07	3361.92	695.023	877.072
G5E8K5;G5E8K5-2;G5E8K5-3	0	7341.58	0	4661.75	5554.62	4464.43	2442.46	4252.86	8770.76	4107.19	4146.88	7046.22	9271.45	7740.77	6749.27	7410.1	3557.03	2546.22	0	8813.88	17090.9	15429.9	13160.1	16436.5	4282.57	4297.41	2902.07	5834.14	9400.86	10247.1
O08529	0	0	4000.13	0	3929.86	5312.59	4699.88	6317.27	4330.62	4915.62	2729.41	3161.95	3667.97	2859.74	3007.24	4044.37	0	2731.62	9503.59	0	7284.11	7242.02	6721.97	6059.3	2303.46	2605.72	2091.36	2563.38	4886.14	5542.88
O08530	0	0	2497.9	0	1113.64	701.576	2790.5	1500.53	0	2028.97	1831.79	0	1512.64	0	1348.74	1243.29	1834.21	2964.99	0	0	2903.52	1879.96	1743.13	2881.91	5778.27	4362.01	4846.85	3294.62	2894.64	2372.27
O08532-4;O08532-5	0	0	0	0	716.477	2142.9	3962.61	952.229	0	0	0	0	369.347	1797.42	2708.02	627.344	0	0	0	0	265.163	503.014	467.684	551.512	0	770.628	0	0	361.378	508.71
O08539	8032.05	13699.6	5693.8	5135.38	5593.65	9952.41	7096.33	8384.19	10937.3	6649.28	9464.67	15589.6	9653.29	11245.1	8173.92	9376.79	3041.13	8820.76	0	0	23115.4	23412.5	24113.5	18179	8672.39	11245.2	4104.09	8239.33	17589.8	18793.2
O08547	0	2415.64	4764.62	2270.48	5344.91	4543.46	13123.6	5195.57	0	0	3821.1	0	2605.42	2297.79	5431.95	1982.55	0	996.008	6225.3	0	1862.01	1952.25	2093.17	3103.49	1754.3	1855.56	2174.36	1200.96	1265.14	1184.91
O08553	62498	51997.1	27536.6	73979.2	193979	278037	245560	191719	54203.9	60048.5	38514.8	49056.8	267389	269330	218167	235810	44479.1	46709.1	31839.6	52662.3	342006	391715	399802	314287	28395.3	35998.9	37564.2	30699.9	156322	204855
O08576;O08576-2;O08576-3;O08576-4	0	0	0	0	2342.56	2256.81	2820.9	2581.64	0	0	0	0	2313.86	0	1423.92	2308.82	0	0	0	0	1690.29	1367.22	1789.22	1339.44	0	0	0	0	727.563	906.217
O08579	0	0	0	0	8342.04	9866.23	14232.8	5488.59	0	0	0	0	4544.15	1893.94	6138.65	2427.92	0	0	0	0	3206.6	3884.04	4738.14	2397.82	0	0	0	0	1058.19	1475.69
O08582	0	0	0	0	696.648	845.796	889.106	969.917	0	0	0	0	0	0	0	436.071	0	0	0	0	565.757	642.978	575.657	471.168	0	0	0	0	0	387.296
O08585	0	2781.35	0	4029.83	41090.2	41310.5	63546	24514.8	3354.8	0	4647.12	16603.2	41994.1	48538.3	72280.6	32003.8	7902.78	8137.43	0	9900.19	158959	214752	295674	134067	2847.55	3372.76	3577.57	2895.26	51531.1	68828.2
O08586	0	0	0	0	1891.88	1305.53	1479	1511.76	0	0	0	0	1096.43	684.398	981.808	1373.48	0	0	0	0	1471.21	1455.43	1556.76	903.237	0	0	0	0	733.417	944.122
O08599	33393.5	34468.5	20922.6	43413.8	30370.6	31925.4	24478	23745.5	34153.5	37604.7	23183.2	26128	34816.4	33263.8	23520.2	30288.1	26036.5	25626.3	15005.3	27219.9	70129.4	73926.1	75581.1	62483.8	26638.9	30075.4	30929.4	32056	44110	49713.4
O08599-2	0	6886.25	0	9458.75	7054.88	6084.77	4335.56	2066.49	5326.2	4263.86	3132.23	0	5863.03	4423.68	2920.36	2560.43	0	0	0	0	5026.64	4629.39	4993.71	4355.17	1684.14	2163.21	2022.04	2093.6	3042.11	3181.16
O08601;O08601-2	0	0	0	0	0	0	0	0	0	0	0	0	0	0	0	1100.05	0	0	0	0	155.324	0	0	0	2959.81	3868.47	3711.02	2491	726.472	911.425
O08709	14604.3	12932.8	12965.9	12769	8868.4	9714.68	18624.4	9664.74	13222.5	14088.9	19960.5	101013	28994.7	22366.4	21058.9	10540.4	17038.7	23690.3	31829.6	16859.9	13629.4	17025.5	19965.9	13699	12107.7	12907.3	14351	16321.7	10400.4	11634.3
O08715;O08715-2;O08715-3;O08715-4;O08715-5;O08715-6	0	0	0	0	0	0	0	0	0	0	0	0	0	0	0	0	0	0	0	0	129.415	127.619	35.7534	116.028	0	0	0	0	119.693	120.439
O08749	16828.1	20615.8	17806	24105	5920.12	7786.21	7009.63	5265.37	21007	26459.7	19226.7	21813.1	8972.55	12377.4	9061.26	9643.71	16021.5	19522.2	13786.3	19551.4	7557.95	7449.33	8516.15	6463.52	27426.9	33609.6	32394	30476.6	13056.9	11428
O08756	36002.4	22984.1	22348.7	22793.4	3891.38	0	774.458	9073.89	22757.5	16398	15531.4	16082.1	3212.68	4446.66	4818.57	2339	35178.4	10699.3	2870.7	0	1195.51	2937.75	1394.99	16490.7	19587.9	4114.28	14096.3	5308.91	4998.31	987.494
O08759;O08759-2	0	0	0	0	5251.03	5299.25	5177.72	6745.82	0	1137.93	0	0	3095.27	2184.76	2052.73	3356.45	0	0	0	0	6006.48	5785.82	5810.97	5110.4	0	0	535.467	0	2803.13	3672.69
O08788;O08788-2	0	0	0	0	1766.07	1256.45	1436.4	1911.65	0	0	0	0	1049.79	668.664	0	1283	0	0	0	0	1343.43	1254.73	987.368	1003.88	0	0	0	0	917.494	1105.4
O08795;O08795-2	0	5120.76	2300.91	6431.57	0	1276.86	725.029	1051.3	2900.52	3935.69	2828.63	5077.53	2141.58	1843.79	1478.62	1737.68	3270.3	3048.96	0	3306.57	338.618	339.868	378.065	324.225	61708	73213.5	64292.7	62743.1	12621.1	12419.8
O08807	0	4005.58	2374.45	4172.43	0	256.211	1684.34	837.661	2905.07	3449.38	0	0	1619.72	1632.19	2215.51	1623.12	0	2594.81	20232.4	0	21.2444	0	186.189	127.762	18835.7	23422.4	18617.4	19407.4	3918.53	3218.51
O08808	0	0	0	0	0	0	0	0	0	0	0	0	0	0	0	0	0	0	0	0	279.377	248.367	82.8995	221.385	0	0	0	0	0	219.947
O08810	0	0	0	0	1419.66	1120.22	1290.72	1454.28	0	0	0	0	0	0	596.312	301.734	0	0	0	0	0	0	0	0	0	0	0	0	0	0
O08848	2602.58	0	3224.11	0	1456.31	1681.99	1526.6	2273.63	0	0	0	0	490.294	0	0	1606.52	0	0	30695.7	0	451.236	0	520.882	501.896	0	1076.33	633.515	2318.42	215.74	313.486
O08917	298481	461674	91886.3	150550	30044.3	5067.42	15236.5	5109.52	345837	51379.1	92490.4	80923.9	18234.9	81443.8	51372.9	2417.29	81541.3	54271.3	48362.1	275706	3229.04	5210.5	4218.59	2820.27	18415.1	33453	14628.6	0	1797.25	1709.11
O08919	0	0	0	2551.29	6248.13	5530.79	4370.98	6126.71	0	3111.07	0	0	8836.07	8145.19	7646.79	6702.87	4484.63	2235.28	0	0	18332	19159.5	20801	15487.7	3566.78	2669.2	2042.33	2868.04	7730.8	9213.33
O08967;P63034;P63034-2;P63034-3;Q9QX11;Q9QX11-2	0	0	2267.05	0	3007.73	3078.55	3494.71	3466.59	0	0	0	0	1434.03	2184.25	2207.95	1648.41	0	0	0	0	3113.08	3239.58	3746.04	3253.89	0	0	1458.79	0	2033.91	2174.8
O08997	0	0	0	5244.42	1980.95	1559.14	2069.97	2280.3	0	0	3318.13	46979.7	17959.1	16429.7	9935.39	5749.9	11562.3	15843.4	0	26819.4	2740.16	4456.75	5734.51	2230.86	2082.66	0	3576.08	0	2208.03	1749.8
O09012;O09012-2	0	0	0	0	2278.2	2754.14	3287.11	1972.94	0	0	0	0	2412.8	2244.73	2040.23	1516.65	0	0	0	0	1619.86	1781.01	1863.26	1214.09	5811.07	0	0	0	1377.08	608.846
O09061	39458.4	15948.3	20512.2	18453.3	3284.26	3583.83	5251.67	4256.86	11172.6	13934	10411.1	19930.8	5829.22	3408.52	4907.37	4053.61	13499.7	12284.9	48248.8	26040	1553.07	1414.37	1683.33	2092.97	7454.74	8058.77	7456.67	11490.1	1452.69	1621.66
O09111	0	0	0	0	1157.86	1274.96	2515.56	1313.24	0	0	3546.22	0	1491.49	1939.57	2050.55	0	0	0	0	0	2210.21	2463.78	2943.82	3477.35	4211.78	1323.69	3551.38	0	2739.1	2556.99
O09114;O09114-2	4503.18	4629	0	2695.05	133.343	1672.53	1743.71	1071.61	1337.01	938.426	2945.93	2135.18	2080.83	1857.05	0	4368.54	0	0	0	0	164.901	398.975	322.251	134.796	0	2964.43	2679.82	4026.67	756.629	711.934
O09117-2	0	0	0	0	0	0	680.703	271.269	0	0	0	0	0	0	0	504.741	0	0	0	0	1087.11	1075.2	1064.23	1194.66	0	0	0	0	312.952	365.544
O09126	0	0	0	0	0	0	0	0	0	0	0	0	0	0	0	0	0	0	0	0	588.98	1004.12	1125.45	774.31	0	0	0	0	1390.25	724.052
O09131	0	0	0	0	1496.25	2085	2207.86	1236.84	0	0	10014.7	32338.9	3963.93	4366.73	2953.63	1445.18	0	0	3549.93	0	3627.98	4979.4	5342.15	3287.42	0	0	0	0	1569.7	1930.96
O09159	0	0	0	0	0	1378.3	0	1333.45	0	0	0	0	2018.56	0	0	296.536	0	0	11610.6	0	0	1433.52	588.14	628.005	5662.7	7619.05	5679.36	7989.28	1413.82	1237.45
O09167	24139.1	25686.5	13430.4	26606.7	7224.1	3641.39	4666.29	4836.07	35793.7	21666.8	23061.3	38217.1	6823.57	13897.7	5031.96	3865.63	18095.2	11061.9	23048.3	32077.7	1102.64	1168.95	877.378	1121.62	11134.6	7710.3	10010.5	10355	1865.61	852.148
O35074	11898.9	5110.61	5065.15	4843.71	0	1211.55	676.001	855.884	0	3260.65	0	0	2376.94	1179.27	0	3835.83	0	0	0	0	63.3259	0	0	0	0	0	358.428	0	0	0
O35083	0	0	18762.1	0	0	1687.88	3250.64	2663.65	0	0	15340.3	0	4277.08	0	8402.07	2592.93	0	7352.04	0	0	6293.85	8339.91	10165.5	33354.3	6967.77	3199.31	6055.47	2952.61	7051.96	6360.79
O35089	0	0	3794.82	0	0	415.872	469.775	271.542	0	0	6464.22	0	487.662	0	999.758	0	0	9848.75	0	0	541.268	485.464	486.973	13561	16439.2	1803.88	12079.4	0	3543.9	683.831
O35098;O35098-2	0	0	0	0	4504.21	4378.5	3535.78	3818.7	12234.9	68807.8	11333.2	4960.91	5309.51	5949.44	3513.27	4814.82	40520.5	0	0	0	5688.84	5974.27	6144.64	4373.21	44496.3	18678.2	19800.8	24815.3	4057.65	4991.47
O35114	0	0	0	0	0	0	0	0	0	0	0	0	0	0	0	0	0	0	27734.1	0	390.67	0	115.22	388.766	2178.1	2727.27	1679.52	1863.14	872.723	861.56
O35127	0	0	0	0	0	0	1080.16	0	0	0	0	0	1358.61	0	0	425.735	0	0	0	0	568.445	693.194	660.232	596.839	0	0	0	0	349.416	586.28
O35129	510411	87651.2	44409.6	68995.2	8237.69	16165.7	26800.4	16487.6	55145.1	24579.8	44048.2	141697	4312.61	23599.1	20749.3	17155.2	246066	52484.6	382426	315619	1068.6	2291.36	7229.65	5058.78	24543.3	18015.4	11343.7	33267.1	7369.53	7083.85
O35136	0	19772.9	6889.97	11726	2902.06	3947.01	9363.44	3259.33	0	15960.4	0	8316.15	4028.91	3474.52	1596.29	2235.68	0	0	0	0	1667.3	1731.95	1746.54	1261.03	2496.1	4574.8	2753.44	2809.41	1219.58	1382.7
O35143	4359.64	4262.22	0	4260.65	0	1126.3	1175.12	0	6628.88	5250.17	5977.1	22087.9	8226.62	5908.25	0	3830.58	5767.28	7313.73	0	8969.48	749.796	822.843	1107.79	536.972	3867.76	5139.69	4439.46	3911.89	1124.4	929.881
O35215	0	0	12780.6	0	0	4774.39	1620.03	486.88	0	0	15885.3	14630.1	2212.23	5243.53	7170.01	2014.68	0	8934.86	0	0	1046.49	996.409	1406.25	8217.49	6391	0	3832.55	0	1513.04	836.266
O35226;O35226-2	0	0	3142.26	0	5197.7	5343.44	8501.43	3653.68	0	0	0	0	2247.47	1829.19	3263.75	1388.02	0	0	0	0	3992.59	4740.97	6483.02	3578.27	0	0	0	0	1890.31	2083.36
O35239	0	0	0	0	519.067	583.463	540.943	537.754	0	0	0	0	1012.19	985.796	0	544.825	0	0	0	0	4366.35	4304.15	4082.65	3694.88	0	534.271	553.696	454.235	2226.44	3020.17
O35250;O35250-2	0	0	0	0	2293.24	2337.1	2668.4	2191.51	0	0	0	0	585.94	0	0	884.102	0	0	0	0	677.167	723.183	684.125	685.309	0	0	0	0	569.745	765.936
O35295	13951.2	0	4432.79	3857.66	5817.7	4081.03	9422.48	4029.86	0	2598.03	3849.23	6251.36	2443.25	0	2867.63	1799.24	6325.12	3917.57	58453.5	11576.5	984.898	1357.01	1187.44	1122.52	1522.16	1757.82	1102.62	4911.91	813.066	944.234
O35316	0	0	0	0	0	0	0	422.796	0	0	0	0	0	0	0	0	0	0	0	0	1425.28	922.779	808.85	623.832	0	0	0	0	658.596	810.789
O35343	0	0	0	0	941.501	753.052	839.41	688.009	0	0	0	0	0	0	0	401.965	0	0	0	0	911.517	495.133	564.352	970.94	0	0	0	0	416.385	509.062
O35344	0	0	404.291	0	5299.81	6612.67	5677.25	5767.52	0	0	0	0	3361.54	2234.7	3056.99	3433.17	0	871.628	0	0	6280.61	7756.39	6976.76	5528.81	463.352	691.884	694.5	1649.49	2650.38	3175.7
O35345	0	0	0	0	1718.6	2124.96	2648.67	1959.82	0	0	0	0	508.857	2954.58	445.769	1397.35	0	0	0	0	1602.04	1932.37	1769.77	1312.9	0	0	0	0	451.075	618.985
O35350	16155.4	0	10241.1	2833.86	1291.82	1269.07	1286.41	1580.31	0	0	0	4080.1	0	0	2468.93	2012.21	15129.8	3750.35	75763.5	10158.4	347.474	347.874	369.521	616.234	0	2458.96	0	8403.62	300.284	589.438
O35381	0	0	2371.94	0	4407	5941.42	11885.3	4205.31	0	0	1524.53	20651.5	10479	7756.11	8682.67	3135.78	2288.48	10099.7	0	0	904.095	910.769	1419.77	446.308	0	0	0	867.248	0	253.909
O35382	0	0	0	0	3016.77	2292.16	2431.77	3833.45	0	1023.83	0	0	1060.17	1071.43	779.351	1576.29	0	1075.72	0	0	1391.71	1181.28	1103.51	1185.51	546.039	0	602.097	0	782.896	1054.07
O35405	0	0	0	0	1595.72	1506.53	2812.02	1259.61	0	0	0	0	0	0	1341.59	2037.76	0	0	0	0	867.353	1101.2	1167.56	923.953	9521.34	11659.9	8728.62	10181.2	2879.42	1865.27
O35449	0	0	0	0	10269	7815.79	10614.6	7147.83	0	0	0	0	3369.09	0	0	3174.49	2177.64	5184.31	0	0	2707.27	2514.62	2502.82	3898.11	5087.23	4886.13	5284.45	5182.12	2681.81	2085.43
O35453;O35453-2;P00755;P15949;Q9QYN3;Q9QYN3-2	99096.1	7887.8	0	0	13118.1	11843.7	5854.47	8429.26	32182.5	61156.1	57145.5	77458.4	15368.6	21449.7	25201.1	12166.8	17826	57971.2	34630.2	47201.7	2091	2980.31	1286.17	0	10157.7	11984.3	6034.95	5855.48	2419.35	3786.02
O35454	0	0	0	0	5978.78	4469.62	8243.48	10461.8	0	16791.1	50380.2	0	3656.04	0	13435.6	7549.85	0	0	0	0	2059.51	2782.73	5826.87	2796.9	48004.8	0	17855.6	0	3284.26	2777.29
O35465;O35465-2	0	0	0	0	6495.53	5860.88	6547.87	6137.25	0	0	0	0	1805.52	1484.94	1545.01	2207.68	0	2067.25	0	0	1006.91	1097.75	1116.51	849.243	1997.2	2054.81	1866.64	0	1456.69	1490.63
O35495;O35495-2	929.907	0	0	0	2790.2	2590.97	2897.63	3084.39	0	0	0	0	3152.11	2855.87	2285.98	2331.11	0	0	0	0	5005.64	5489.58	5369.12	4814.99	0	0	0	0	1709.63	2562.47
O35526	0	0	0	0	2111.87	1117.82	1176.37	1209.03	0	0	0	0	1558.43	3397.65	2808.4	1126	0	6742.16	0	0	4803.37	4117.18	3526.32	4324.37	3810.37	3630.09	4192.6	4103.65	4363.29	4109.83
O35551;O35551-3;O35551-5	0	0	0	0	2212.68	2364.09	3268.73	2716.95	0	0	0	0	1031.19	0	624.007	1083.05	0	0	0	0	1438.65	1269.43	1543.34	1244.44	0	0	0	0	821.342	848.897
O35607	0	0	0	0	0	459.705	1618.67	1163.04	0	0	0	0	525.24	0	0	1217.07	0	0	0	0	3382.54	2751.24	2699.77	2410.34	0	385.214	0	0	703.27	955.013
O35609	0	0	8250.78	0	1353.24	1243.13	1585.29	1083.65	0	0	4625.97	0	1842.43	1966.08	3618.04	1480.92	0	1849.97	0	0	8685.31	10709	12215.3	9510.56	3237.15	1573.18	3561.64	1211.79	3983.93	4185.16
O35621	0	0	0	0	0	675.67	0	0	0	0	0	0	0	0	0	0	0	0	0	0	1384.72	1694.87	1530.19	1486.48	0	0	0	0	1324.25	1709.84
O35633;O35633-2	41413.4	41223.3	71198.5	42101	19579	15488.9	12270.1	14986.4	44275.2	39483.9	44817.3	13127.7	21201.8	9672.39	32068.1	17540.9	16209.1	21742.3	5574.75	14540.7	15275.2	12180.3	10900.7	29953.4	39891.7	27410.5	39970.1	20872.9	20158	12409.2
O35639	0	0	6482.51	0	0	0	591.464	1725.32	0	0	0	0	1455.39	0	5046.11	889.307	0	0	31919	0	1176.6	0	1634.2	1539.49	0	0	0	0	139.236	1426.8
O35640	2264.14	0	13906.9	0	0	0	194.86	1181.87	0	0	0	2293.24	0	0	641.383	0	4331.28	0	31821.7	0	0	0	0	0	0	0	0	4111.83	0	0
O35643	1867.97	2888	2521.25	0	5216.21	4835.03	6013.26	6010.54	0	0	0	0	2695.91	1559.29	2018.67	2500.33	0	0	4671.72	0	9185.23	8031.33	7361.06	6486.32	2335.14	705.478	833.243	1526.51	5339.72	7865.04
O35681	0	0	0	0	689.087	889.663	1083.52	895.668	0	0	0	0	1200.85	1344.86	865.333	1118.99	0	0	0	0	6162.59	5736.09	6395.46	5307.53	0	0	0	0	1919.13	2705
O35682	19513.4	0	6708.98	7654.1	2042.11	1615.65	1758.65	1272.02	5965.24	3943.58	6601.17	8359.65	1780.07	3640.49	3845.37	1652.18	11103	5336.14	18106.5	0	3609.55	2842.95	2791.05	5639.12	8698.67	3622.5	5156.1	4456.1	3252.54	2482.73
O35737	1406.82	2274.7	7753.52	2043.69	7932.11	5328.77	11783.9	6886.68	0	2423.71	0	5940.72	2632.24	1457.98	3311.77	1951.85	0	1828.41	16041.8	0	1864.65	1915.66	2507.91	1601.71	0	0	0	3023.69	710.025	967.795
O35857	0	1753.56	0	0	0	0	0	0	0	0	0	0	0	0	0	0	0	1462.35	0	0	616.96	413.133	639.848	386.304	3176.59	2205.83	3149.8	3327.96	963.267	883.097
O35864	0	0	0	2411.85	2503.88	3917.7	4154.46	4027.61	3642.99	3441.78	0	0	1656.97	2576	2154.06	2717.36	1827.57	2650.29	0	0	3504.88	3973.46	3520.57	2985.59	0	1546.5	0	1644.2	2089.95	2245.3
O35874	0	0	0	0	3370.52	2703.47	3401.92	2659.53	0	1404.72	0	0	925.643	1383.14	1810.92	1545.4	0	1147.08	0	0	1762.87	1460.43	1516.72	1822.44	2311.12	2655.75	2278.04	2175.77	1768.1	2257.65
O35887	10849.3	20582.8	11363.7	17234.5	3052.23	4247.37	3657.91	3848.77	18026.2	18341.8	19509.6	30612.7	12766.9	13852.6	18357.2	9610.21	18110.5	19042.8	14188.9	21766.4	1450.1	1662.2	1793.63	913.652	309409	469262	365567	345014	74061.5	70359.6
O35927;O35927-2	0	0	0	2489.83	8918.53	8624.87	7080.78	10603.5	0	497428	0	0	5272.56	4480.85	3518.71	6019.03	1469.04	1866.42	0	0	19465.9	16569.9	14914.9	18197.8	2174.15	3181.72	2741.97	2454.41	9922.13	9082.98
O35945	7104.6	27041.8	78661.9	9741.38	11881.3	8201.67	19541.3	18459	25478.9	10379.7	26116.8	18744.2	10667.1	25488.4	20285.1	15557.1	18877.7	58845	10753.2	98152.2	73057.6	80725.8	84951.4	85781.1	19823.3	35957	5612.39	42083.3	38922.6	69274.5
O35954	0	0	0	0	10788.2	9652.3	8282.1	12707.8	0	0	647.669	0	4237.57	3017.05	3692.59	5599.44	9473.67	0	0	0	7870.67	7565.84	6881.73	6549.19	0	684.565	0	574.952	3596.14	4317.28
O35963	0	0	0	0	0	0	0	0	0	0	0	0	638.827	0	556.908	0	0	0	0	0	3370.3	3402.32	4575.12	2891.72	0	0	0	0	2241.87	2491.71
O54734	7579.1	6178.98	8083.79	6385.31	1235.3	1488.23	1493.66	1347.84	3369.1	6879.06	6317.07	4966.94	2465.18	0	1814.36	2334.88	6532.92	3325.8	27398.7	5327.81	712.982	617.934	683.683	776.557	42882.9	56205.7	43615.6	60617.7	8828.49	8747.74
O54774	2567.17	0	1769.1	2866.81	3622.16	4721.78	4277.47	4520.14	8983.94	3336.5	2197.11	3737.54	2935.25	2694.68	3321.27	3143.7	1397.28	1984.04	0	0	7657.4	6692.36	6226.96	6795.13	3697.38	4382.2	2710.67	2379.47	5044.43	5787.41
O54781	0	0	0	0	3640.44	2936.83	4204.56	3513.29	0	0	0	0	896.566	1394.41	1540.37	1158.75	0	0	0	0	2295.5	1986.07	2098.58	1797.05	0	0	4437.21	0	982.022	1314.89
O54828	0	0	0	0	0	0	0	0	0	0	0	0	0	0	0	0	0	1368.38	0	0	348.606	371.103	390.133	342.502	2601.27	2107.6	1879.13	2977.35	765.815	680.388
O54829	0	0	0	0	6636.99	7824.63	8623.61	6098.45	0	0	0	0	5284.56	5049.97	4709.06	4492.01	0	0	0	0	22214.8	24467.7	31891.1	21426.8	998.152	0	1050.23	0	8910.57	10697.1
O54834;O54834-2;O54834-3;O54834-4	0	0	0	0	2629.21	1787.48	2256.98	2554.56	0	0	0	0	1329.72	2271.26	2104.07	1459.8	0	0	0	0	3141	3005.45	3588.23	2623.27	0	0	890.378	0	1459.12	1679.9
O54865	0	0	0	0	2622.66	4092.35	3581.5	4500.09	0	0	0	0	587.392	0	0	1500.04	0	1916.7	0	0	661.339	599.463	565.387	553.888	1108.19	2145.75	0	846.641	363.193	494.387
O54901	0	0	0	0	2064.1	2881.51	15763.4	2967.26	0	0	0	0	3479.72	0	5422.95	2601.75	0	0	0	0	0	0	1807.02	229.591	3513.93	2993.81	4620.39	0	381.086	515.778
O54916	0	0	0	0	2213.07	3664.45	4693.37	2041.24	59223.8	100890	0	0	2778.13	2392.5	4333.05	2204.5	0	8157.25	41829.8	0	6494.61	4493.58	5044.65	2508.46	1200.61	0	1504.92	0	1308.56	4492.2
O54931;O54931-4	0	0	0	0	6193.6	5830.93	6199.63	5098.42	0	0	0	5488.56	2226.33	2025.3	3239.99	1514.87	0	0	0	0	0	0	0	401.772	0	0	0	0	151.833	131.749
O54962	0	0	4304.37	0	0	0	0	0	0	0	2626.37	17583.8	7055.5	4575.83	3828.61	906.109	4261.7	3008.98	10276.8	6377.81	708.199	595.324	877.494	822.806	780.984	0	793.217	8541.14	588.634	1010.82
O54983	0	0	2532.23	0	0	0	370.445	0	0	0	5400.29	0	2731.36	0	3223.11	859.025	2366.82	3637.33	0	0	1487.22	1556.3	1571.28	5710.17	3490.13	2514.15	4362	1445.06	1623.41	1292.27
O54984	0	0	7054.76	0	4454.14	4748.56	7116.03	4625.35	0	0	6225.41	9415.48	2858.84	3669.46	4261.73	2870.77	0	8891.6	11418.9	0	3507.31	3955.53	4125.28	3860.13	0	4236.52	4313.97	0	2003.01	2419.35
O54988;O54988-2	0	0	0	0	0	0	0	277.796	0	0	0	0	0	0	0	252.461	0	0	0	0	489.149	308.834	324.15	207.864	0	0	0	0	0	325.762
O54991	4983.92	3241.76	1620	4433.28	3496.75	1732.55	17052.8	5068.16	3725.35	2865.26	0	0	1860.12	3073.88	1394.92	1597.29	2800.82	970.679	0	0	1362.94	817.373	1128.25	942.525	9818	9544.07	9052.15	12537.6	3352.06	2661.91
O55017;O55017-2	0	0	27774.7	0	2650	836.439	2005.91	2291.71	0	0	0	0	8088.74	4504.93	0	2379.52	0	0	0	0	4448.42	5086.65	4636.24	3296.8	706.979	5130.86	1259.48	1007.99	3335.21	5253.93
O55022	61848	114169	47997.3	74726	32334.4	42276.6	47242.4	25444.5	89170.8	100670	50339.8	64355	66777.5	40457	19562.2	43610.6	53531.7	52816.3	39613.4	55979.4	14385	16778.2	13406.1	9647.7	124038	182059	173981	122936	38548.5	32018.2
O55023	0	0	4689.79	6225.44	3014.32	2663.43	3501.82	2654.37	0	5294.53	5876.92	0	2972.94	2322.81	5050.68	2507.47	0	3620.7	19535.9	0	4702.6	5007.1	5268.08	5733.11	1929.37	0	2172.29	1534.42	3317.88	3600.65
O55026	0	0	0	0	973.7	0	4771.11	1253.72	0	0	0	0	0	0	0	353.713	0	0	0	0	0	340.807	293.207	0	0	0	0	0	0	0
O55029	12116.3	0	6102.82	0	1869.03	1962.92	2323.93	2257.23	0	2747.01	6839.8	9965.59	2276.72	0	3742.06	2177.72	6402.14	3893.56	51573.4	0	505.585	491.169	838.961	333.011	1886.44	2911.95	0	6403.52	162.605	612.345
O55042;O55042-2	124999	39253.7	40502.2	40976.8	59449.2	51895.6	64819.8	38343.3	84844.6	53813.9	30283.6	97335.1	107778	202152	189546	81618.1	95288.1	80260.9	155138	150236	399750	636483	920258	356627	87233.2	95264.7	72731.6	53795.2	131014	158618
O55074;Q7TN79	0	0	0	0	0	0	133.469	123.124	0	0	0	0	0	0	0	0	0	0	0	0	1155.42	1670.81	2273.98	940.396	0	0	0	0	1495.8	2027.45
O55091	0	4926.39	0	4903.55	10833.2	11861.9	13001.4	10187.2	0	3816.67	0	0	6607.38	4354.11	4273.6	5288.11	0	0	0	0	3250.44	3372.79	2928.82	2232.43	0	0	0	0	2898.39	3190.08
O55100;O55100-2	0	0	4754.86	0	3967.04	3276.57	3576.9	2395.9	0	2070.28	4579.28	0	8168.45	13729.3	8313.61	3914.44	4031.89	4497.39	0	6459.5	43210.4	49065.2	65337.4	37695.8	4872.81	4201.76	6778.29	4041.11	16171.4	17249
O55106	0	0	0	0	1705.12	1919.64	1930.75	1957.07	0	0	0	0	0	0	0	771.621	0	0	0	0	1289.73	1382.5	1331.49	974.342	0	0	0	1815.82	974.794	869.046
O55125	8908.9	11945.6	10622.5	17298.8	4018.9	4746.03	4251.88	3471.66	23364	12425.5	13432.9	13932.9	4259.31	6070.89	3824.96	4421.7	9871.35	11483.4	12098	15861.5	3359.41	3158.47	3360.44	3049.02	18787.7	24242.8	24836.4	19504.5	7044.93	5557.73
O55126	0	0	0	42148.7	6519.23	6275.49	1437.25	7550.85	12940.3	5300.86	22701.2	41544.8	2228.16	7457.95	11425.5	4566.52	10680.4	19521	0	0	428.814	1407.94	1534.35	2061.74	10608.1	9038.42	6033.12	10474.7	2030.87	2320.46
O55131	3736.56	6998	5138.93	6927.61	5899.86	10751.5	11984.9	8198.29	26434	10587.9	28053.7	8485.81	11711.2	14789	10519	10446.4	11081.1	9923.67	3545.35	8915.92	46501.1	50329	51859.1	39244.6	12209	14188.7	13042	13496.7	28348.6	32846.1
O55135	19539.1	0	10407.1	0	2100.55	2766.52	5137.1	2051.55	0	0	0	5257.28	1206.39	1308.19	2758.79	4321.21	18208.1	3336.34	108584	15669.3	538.133	971.093	1129.13	965.089	2121.68	3123.02	1676.76	6977.5	733.448	1600.79
O55143	12639.4	12434.6	10812.9	12396.3	9858.8	7886.36	6880.93	9601.28	12314.1	15770.2	12535.4	11530.9	6215.31	5735.45	6087.97	6993.78	36440.9	17646.3	17666.7	14583.7	13880.8	12255.9	10979.9	15005.2	19813.7	16840.5	15752	17107.7	8263.3	7565.6
O55229	0	0	0	0	0	810.687	0	1672.49	0	0	0	0	597.754	0	0	907.941	0	0	0	0	1241.76	1357.68	1156.15	768.721	0	0	0	0	1004.38	1245.64
O55234	20799.6	4259.73	6003.77	4351.64	4875.85	4968.58	7408.9	4389.09	0	5087.37	3511.13	5316.62	3241.53	1994.72	3235.69	3091.64	3439.19	2996.15	42349	9808.59	3793.99	3920.95	4911.1	3628.94	4249.94	3391.52	3248.85	5739.24	3019.91	2982.32
O55242;O55242-2	0	0	2506.32	0	2311.57	1475.95	1821.19	1890.66	0	0	0	0	1690.02	1124.21	1358.61	1211.5	0	1762.54	13676	2976.91	1706.65	1870.74	1661.46	1985.1	10993.1	9993.47	9939.18	11700.2	2695.55	3112.58
O70152	0	0	0	0	2994.92	2240.07	4554.14	2461.92	0	0	0	0	1401.35	0	1887.33	1436.32	0	0	7416.43	0	876.505	816.978	684.854	803.49	0	0	0	1097.56	0	520.7
O70161	0	3238.64	0	0	11814.5	15838.5	16380	12926.7	0	0	2013.81	5278.06	5783.21	6270.64	6116.26	8434.87	5763.24	0	8474.71	0	18788.6	21134.1	24275.6	15971.6	1763.35	2728.29	2458.82	2452.52	8988.04	9322.82
O70166	0	0	0	0	1095.75	1467.42	2579.92	1050.62	0	0	0	0	1391.1	2169.74	2275.09	1019.61	0	0	0	0	2240.05	2885.98	3440.25	1839.97	0	0	0	0	938.893	1163.72
O70174	0	0	0	0	1468.8	1290.22	1239.76	1563.41	0	0	0	0	917.175	1095.31	1054.89	749.139	0	0	0	0	3705.61	2988.43	3619.88	2514.79	0	0	0	0	1563.64	1591.67
O70228	0	0	2196.63	2201.36	2592.16	2088.75	2242.81	3881.16	0	0	0	0	1254.31	0	3409.48	2054.78	0	0	0	0	1885.04	1705.15	1289.93	2169.49	2556.85	2102.29	1698.93	0	1272.61	1470.82
O70251	3897.07	0	25567.5	2072.5	3964.44	4582.39	10175.4	3079.4	0	2744.46	5261.17	12134.3	6760.04	4956.47	6077.04	2116.56	0	8474.25	50648.3	0	1304.26	1238.97	1706.56	706.619	0	0	0	5591.59	0	412.17
O70252	0	0	2406.76	2896.32	3133.71	3174.27	4341.25	2633.43	0	2646.76	0	0	2223.27	2039.56	1975.84	1769.23	0	2311.15	0	0	1187.25	1235.63	1404.54	924.669	2837.57	3009.68	3140.38	2786.59	1016.37	1076.11
O70305;O70305-2;O70305-3	0	0	0	0	1292.37	1064.92	1400.34	1341.56	0	0	0	0	311.466	0	862.95	384.973	0	0	0	0	598.646	470.931	496.534	491.045	0	0	0	0	196.646	148.956
O70309	0	14490.6	5303.98	8639.84	12020.5	2394.04	11002.1	5203.28	0	6941.1	12558.9	9062.25	3634.37	6980.69	8879.36	1962.3	12025	12329.9	20529.6	27241.3	14717.7	6738.02	17331	5750.89	14776.3	20103.7	14403.8	13861	3666.61	3671.62
O70318	0	0	0	0	308.114	89.917	323.779	277.199	0	0	0	0	349.669	0	0	226.256	0	0	0	0	238.286	210.605	293.928	80.9665	1309.77	1609.3	1657.6	1091.64	503.677	497.85
O70325;O70325-2;O70325-3	0	0	0	1412.57	3225.88	3853.64	5559.62	3982.57	0	0	2444.25	0	2978.07	2619.75	2793.76	3126.47	0	1838.08	0	0	5892.48	6270.43	7358.61	4867.94	3527.42	3971.96	3327.6	3409.25	4299.56	4660.38
O70370	6381.47	17638.3	8127.79	16955.9	2779.63	1674.69	2835.3	2552	7758.95	17541.8	11294.5	12806	4703.25	4922.48	3022.61	5196.31	13365.1	16885.6	0	6098.79	1221.61	1023.92	1128.61	1224.47	89371.5	112378	98084.2	95253.5	21855.9	20261
O70435	38378.7	7980.67	13040.8	7886.6	5087.68	5998.14	11279.6	5559.82	3606.22	4004.86	6810.48	12882.3	3430.16	3402.23	5348.07	5089.42	9132.84	6463.86	57854.2	17133.4	3914.97	4276.33	4813.57	2936.87	4258.27	5164	3523.76	10811.4	2972.59	3530.59
O70439	0	0	0	0	6863.99	6617.65	10176.2	5407.93	0	0	0	0	5542.56	4851.53	7753.36	3957.58	0	3406.47	0	0	10704.6	15739.7	17860.7	9576.31	2064.81	2028.07	2133.02	2675.71	5298.93	6967.22
O70443	0	1679.64	951.145	1768.95	14541.8	13615	17556.4	15685.7	0	1942.6	1724.43	0	6921.41	5044.23	6251.88	11159.9	7628.83	4202.21	0	0	17805.1	18175.2	18582.9	14671.7	5255.58	4312.41	2624.87	5898.99	8593.75	11842.6
O70456	4363.41	0	42799.4	0	0	1467.88	2059.36	862.295	0	0	0	9292.09	0	0	4169.21	0	3214.71	0	48699.5	0	0	0	0	348.602	0	2843.9	674.458	14726.9	0	0
O70492	0	0	0	0	6664.02	8084.72	9538.76	3858.07	0	0	1165.3	0	2686.08	1513.12	3228.64	1984.46	0	0	4067	0	1082.09	1911.59	2476.15	1188.85	0	0	0	0	513.904	484.04
O70493	0	0	3472.94	0	11078	11661.8	13690.1	6864.94	0	0	0	0	7398.01	6663.34	10364.1	6840.52	0	0	13667.6	0	13232.6	17458	22263.7	13316.6	0	761.499	0	0	5221.18	5773.11
O70503	9872.59	12968.8	13007.6	15526.4	5165.93	4503.62	5621.38	4121.08	16133.2	15529.8	14342.8	13555.2	5339.78	6691.07	11077.6	4253.07	8771.51	9446.97	0	11726.2	1771.08	1874.08	1608.89	3422.12	6428.48	9125.73	7993.15	5926.04	2473.19	2115.6
O70507	0	0	0	0	2536.25	2059.53	1585.63	2271.47	0	0	0	0	1635.92	0	1594.33	1206.22	0	0	0	0	2286.17	1796.96	2057.87	1525.78	0	0	0	0	1219.65	1271.43
O70579	0	0	3950.45	0	691.627	0	0	0	0	0	2948.8	0	952.154	0	0	655.735	0	1149.99	0	0	120.976	0	820.823	2819.77	2544.71	0	1247.11	0	525.887	292.134
O70582	41844.1	4368.16	9901.13	11237.7	1588.09	1515.09	1126.62	2310.93	0	0	6498.9	13698.5	0	0	3891.85	3611.66	0	5664.8	37667.3	13742.5	0	724.599	516.674	666.023	4505.99	4487.2	2549.18	8952.83	1112.7	588.444
O70589	0	0	0	0	3459.38	3054.03	2156.85	3445.68	0	17490.3	0	0	3263.49	4693.31	3031.56	4077.03	0	149679	23642	0	18591	17367.2	17526.1	16227.4	2589.57	115221	5101.54	4089.87	9005.02	10128.8
O70622;O70622-2	0	0	2045.56	0	0	0	0	0	0	0	2711.18	0	0	0	0	0	0	0	0	0	184.318	208.661	193.568	3376.11	0	0	0	0	369.197	0
O88312	0	0	0	0	0	0	0	5155.08	0	0	0	0	0	0	15076	0	0	0	0	0	312.223	0	0	975.607	0	0	0	0	0	0
O88319	0	0	0	0	5341.21	2420.5	3297.23	3884.7	0	0	0	0	965.761	0	0	2714.84	0	0	0	0	931.527	1024.22	1353.36	857.24	0	0	0	0	337.124	350.806
O88342	5203.03	6983.12	5357.54	4059.68	7063.66	6569.11	7246.14	7503.39	7938.22	6307.11	4019.09	4398.79	5609.71	5821.87	4458.63	6647.7	4165.25	4264.38	10831.4	0	9704.62	8148.14	8601.79	7711.47	5977.78	6743.5	6773.98	4159.87	6405.74	7872.6
O88343	18520.5	21922.4	14615.7	23082.2	14089	11070.6	18328.1	16378.1	17261.1	19976.4	14513.9	9238.53	8437.88	8751.62	6388.45	10494	4903.52	5978.46	3049.95	4350.03	11269.9	8558.72	6361.98	10416.5	19513.3	17928.1	21205.7	15232.2	10893.2	12695.8
O88384	0	0	0	0	3621.41	3613.53	7779.66	2938.8	0	0	2341.83	0	2238.18	2403.09	2515.25	1292.67	0	0	0	0	1337.06	1431.36	1741.3	1068.36	0	0	0	8975.07	569.032	574.263
O88441	0	0	0	0	3711.99	2317.31	5669.8	2582.71	0	0	0	0	0	0	0	0	0	0	0	0	1165.15	2251.96	1720.02	1897.99	4482.12	3784.73	3998.27	0	2056.53	2593.5
O88444	0	0	0	0	0	276.703	861.977	927.463	0	0	0	0	1114.47	0	968.178	1310.49	0	0	0	0	2302.91	1988.49	1874.53	2212.59	1716.22	0	1371.09	1426.07	1512.53	1379.16
O88447	0	0	0	0	3373.48	3701.06	2848.04	4561.07	0	0	0	0	4862.38	6510.64	5213.21	4581.38	0	0	0	0	17224.5	17149.6	18546.6	13785.2	2237.64	0	2785.3	0	7118.96	7929.09
O88448	64284.7	0	0	0	2568.46	3744.74	3282.14	4584.62	0	0	0	0	3483.44	5970.95	3605.8	4582.33	0	0	0	0	14106.7	14040	15887.1	11759	579.891	1364.39	1036.26	0	5416.29	5995.57
O88456	25836	3876.46	11198.4	4347.03	5274.06	5866.65	8891.86	5204.62	3476.29	0	3664.17	9667.57	2699.5	5140.86	5304.82	3425.95	9594.22	4422.03	77318.3	13648.9	1254.42	2332.49	2428.91	996.167	2052.58	2713.57	1529.14	10492.2	1368.53	2085.12
O88485	0	0	0	0	2803.45	2554.47	3386.09	2491.76	0	0	0	0	2634.31	1161.09	1801.24	2042.29	0	0	0	0	2066.74	2024.66	2118.81	1569.65	0	0	0	0	1514.56	1763.92
O88487	0	0	0	0	1185.72	1100.26	1187.93	920.788	0	0	0	0	1042.3	962.917	0	1635.09	0	0	0	0	758.536	683.737	841.096	793.178	0	0	0	0	686.712	611.986
O88492;O88492-2	7666.3	5325.44	4808.55	11101.3	52704.8	33314.8	54898.5	34249.3	9283.21	4876.68	5203.46	8618.09	1895.07	4235.29	86685	979.756	0	1383.33	0	3689.36	18059.1	10809.5	27308.3	8130.24	1263.9	842.958	745.276	978.443	224.167	23579.3
O88507	0	0	0	0	1713.06	311.635	8512.32	1397.15	0	0	0	0	1090.89	0	1094.82	485.433	0	0	0	0	72.3237	73.5888	233.17	169.461	1841.9	1878.79	941.038	2022.93	295.841	311.937
O88532	0	0	0	0	929	352.201	593.015	662.282	0	0	0	0	0	0	0	0	0	0	0	0	0	0	0	0	0	0	0	0	0	0
O88533	0	0	0	0	41437.2	32111.6	36839.4	36974.1	0	0	0	0	36834.3	29848.9	23338.9	31627.1	0	2844.48	0	0	106228	105486	100710	85046.3	2530.38	2230.8	3722.37	1340.12	63028.6	79463.7
O88543	0	0	0	0	4152.73	5882.12	7868.39	5629.13	0	0	0	120302	4545.96	2050.25	5711.66	3824.42	0	0	0	0	9057.62	12803.5	13528.6	8598.59	32113.1	333.256	675.458	43401.6	3677.56	4523.18
O88544	0	0	0	0	1650.52	1849.07	2208.43	1848.96	0	0	0	0	1406.34	0	969.394	1095.05	0	0	0	0	2230.34	2695.35	2336.51	2059.62	0	0	0	0	1681.48	1916.23
O88545	0	0	0	0	3482.47	3392.39	5055.59	2451.2	0	0	0	0	2169.99	2061.3	2512.94	1618.55	0	0	0	0	4152.08	4589.2	5268.59	3622.9	0	476.112	0	0	2144.11	2570.12
O88569;O88569-2;O88569-3	4118.72	0	12933.7	3761.69	22078.8	14588.6	46039	17804.4	0	0	7091.9	8468.14	5946.4	2750.51	9980.41	3585.26	4444.96	4114.62	18775.7	4742.76	1086.02	1238.96	1182.42	695.88	523.645	2400.23	2301.29	2714.09	327.622	292.252
O88587;O88587-2	0	0	0	0	1677.52	1269.19	2175.32	1062.22	0	0	0	0	0	0	2158.24	0	0	0	0	0	468.832	531.26	367.737	1525.95	0	0	0	0	0	305.086
O88643	11258.4	0	0	14086.9	7993.73	12219.9	11347.8	7689.13	0	17055.8	9466.6	10706.4	8746.87	9719.62	6434.85	8065.9	0	8909.26	0	0	24262.9	24332.4	26472.3	19301.1	5307.37	7454.81	5125.31	4666.98	9064.31	13019
O88653	0	0	0	0	0	1487.93	3053.63	955.692	0	0	0	0	867.173	0	1101.67	924.153	0	0	0	0	572.028	957.136	1327.66	1889.83	2001.79	0	0	0	855.025	981.078
O88685	67954.7	40264	25145.2	0	6364.87	6559.03	13962.4	6876.07	0	1559.14	14352	12646.6	6566.28	3394.96	6635.38	5769.61	33933.1	3413.6	5144.29	12404.6	4345.14	5037.19	5436.63	4737.53	2010.87	6964.06	4343.07	7909.66	3560.33	3160.26
O88689;Q91Y11;Q91Y13;Q91Y20	0	0	0	0	0	0	0	0	0	0	0	0	0	0	0	0	0	0	0	0	1385.83	1221.87	1600.69	1061.2	0	0	0	0	690.298	939.907
O88712	0	11354.3	7452.14	11424.2	7554.54	7864	7341.5	7320.02	10148.1	7157.27	7965.04	10052.5	8855.81	11295.8	7985.46	7274.75	10863.1	5835.26	7670.92	24057.2	37846	40637.7	39634.6	34884.5	3987.89	5522.38	6259.75	3895.94	18735.2	20415.2
O88737	5563.91	0	0	10275.4	2500.32	2095.96	928.64	2713.81	0	7742	0	9498.19	3130.92	4873.01	3071.67	5167.64	1541.94	2961.27	0	0	41037.8	28723	32161.6	24173.9	3413.58	3802.03	3657.92	3198.34	16611.1	18880.3
O88741	0	0	4776.71	0	7125.26	8182.64	14380.3	8620.94	0	0	0	0	2617.23	1383.45	5465.72	3245.28	0	2975.06	0	0	4462.64	4638.86	6282.71	3400.49	4288.88	3836.17	4492.95	2793.31	4996.73	5355.23
O88746	0	0	0	0	1640.02	1293.8	1862.31	1508.56	0	0	0	0	1131.47	0	1088.07	1212.93	0	0	0	0	1633.4	1665.15	1703.04	1264.29	0	0	0	0	1190.78	1216.81
O88811	0	0	0	0	1065.69	1586.59	1535.21	1257.05	0	0	0	0	911.36	0	356.612	751.543	0	0	0	0	2540.3	2015.45	2324.1	1847.52	0	0	0	0	777.104	909.727
O88834;O88834-2	0	0	118096	0	1426.77	1502.42	2021.23	1385.28	0	0	205766	0	4451.91	498.725	9585.48	1910.45	0	55347.8	0	0	3959.24	4042.92	4900.17	36612.2	24485.7	0	16644.1	0	2724.47	1233.02
O88844	3769.34	25434.5	7888.2	5708.75	3330.34	3569.61	3369.34	4133.88	0	13801.4	17283.6	7878.7	5629.17	4902.46	5167.94	4001.62	4945.7	5677.79	28997.3	6034.76	5992.59	5389.38	5402.11	3912.59	1662.44	5722.55	5501.15	7983.11	4462.61	5560.56
O88845	0	0	0	0	818.22	180.294	882.085	427.293	0	0	0	0	0	0	0	448.752	0	0	0	0	1269.25	1156.01	1027.04	1125.19	0	0	0	0	685.946	898.365
O88848;O88848-2	0	0	0	0	0	0	441.658	0	0	0	0	0	413.218	0	0	0	0	0	0	0	478.425	436.628	462.097	535.407	0	0	0	0	216.545	242.068
O88935	12617.1	10517.4	6306.43	12559.1	9563.4	9380.15	8133.05	9967.68	25073.7	11462.6	7410.88	15494.8	14095.6	16495.4	8978.87	15547.7	9332.2	11892.4	13731.2	14697.7	46613	51466.9	51357.8	66049	12520.2	14797.4	12686.7	10697.8	23799.2	21617.2
O88935-1	25137.2	14698.8	6598.41	18047	16606	15007.1	12344.5	11864.9	31895.5	18965.5	13864.1	20255.4	20624.8	28435.7	15792.3	16214.5	15580.3	12096.5	20955.1	16455.3	55200.7	68569.3	61688.8	50509.6	14445.4	16904.6	13010.8	16211.6	26512.5	32637.3
O88951	0	14155.1	0	0	826.292	1022.85	2069.59	988.903	0	0	0	0	745.635	852.797	594.561	739.911	0	0	0	0	1369.23	1693.86	2163.36	1116.35	0	0	0	0	888.311	696.901
O88958	0	0	0	0	2868.24	4470.25	6194.77	3318.47	0	0	0	0	2380.81	3519.82	5491.84	2417.55	0	0	6524.42	0	8160.36	12093.4	12855.3	8069.42	0	0	0	0	3603.66	4336.42
O88983	0	0	0	0	1158.68	962.956	2139.46	1348.58	0	0	0	0	952.301	0	0	1041.16	0	0	0	0	502.263	535.644	1192.55	568.78	2409.51	0	916.377	0	641.089	578.154
O88998;O88998-3	0	0	0	0	0	0	2912.79	624.991	0	0	0	0	412.191	0	0	220.533	2172.69	1775.41	0	0	173.568	294.734	0	0	4397.17	5117.4	0	7084.36	1322.64	1440.7
O89026	0	0	0	0	611.075	358.117	1456.43	1099.85	0	0	0	0	1410.39	1169.53	342.838	884.993	0	0	0	0	4977.39	4558.85	4191.97	4338.15	0	0	0	0	1641.13	1866.42
O89051	0	0	0	0	0	0	0	0	0	0	0	0	0	0	0	0	0	0	0	0	170.391	0	0	166.228	4393.79	4993.3	4439.21	4344.62	1084.51	1235.05
O89053	4112.9	2639.17	707.186	5104.64	3790.47	3131.81	4970.6	5793.44	4880.38	5144.75	1990.6	6944.12	3640.65	4209	11027.7	4135.01	6883.78	4571.64	4201.82	4917.21	5871.02	5976.57	6213.46	6207.56	3955.47	6313.2	5565.91	5053.05	5578.79	7049.53
O89086	0	0	2258.08	0	2925.77	2470.4	4770.12	2461.85	0	0	0	0	2380.38	0	1706.07	767.383	0	0	0	0	627.834	579.812	647.499	644.048	0	0	0	0	266.81	0
O89094;O89094-2	14118.6	0	19968.7	0	2240.94	8162.91	4205.66	3977.87	4485.13	4071.96	9120.55	6369.08	2272.58	0	3503.87	7446.16	10150.9	0	25282.6	27853.7	4049.38	2147.2	333.404	2079.17	4805.77	12030.5	9262.78	21799	1694.78	848.92
O89112	0	0	0	0	5082.49	15677.1	5805.04	6114.86	0	0	0	0	5439.65	3554.24	5979.27	6361.79	0	42216.7	0	0	14403.6	12175.2	11764.8	12861.5	2285.74	2963.23	2296.97	1821.37	4853.19	6411.97
P00158	8814.96	7248.46	225541	6390.83	2457.86	3971.65	2608.54	2410.49	18805.8	8870.8	252013	5139.53	17062	5507.27	40716.8	3804.42	7458.87	212977	6369.94	4742.23	6754.33	5973.23	2428.8	251051	313692	25303.3	317912	11926.7	58259.2	9247.18
P00397	4480.17	11261.6	92296.4	10566.3	1643.94	1891.04	1352.31	1467.85	15694.2	8594.84	77031.9	4886.68	9433.24	3754.74	14942.7	2251.48	5148.38	73370.1	5359.49	6749.76	5267.98	4065.83	3497.25	94927.4	119835	13902.5	88353.7	6780.34	29233.3	4977.61
P00405	33123.6	23484.3	72809.8	32758.1	38566.3	52263.1	87856.4	36721.1	19907.8	19151.1	57282.5	18414.3	25875	19287.8	39264.3	19773.7	25110.8	61776.3	20538.1	17077.9	14707.1	13128.4	16515.9	73603.4	235914	33340.2	158483	22085.4	47909.8	17098.3
P00416	1861.53	2052.39	28248.2	0	1636.44	928.8	1068.67	450.981	5776.51	0	28914	0	1800.44	1618.76	6078.95	1012.49	2529.21	26250.8	2043.92	2611.55	1852.76	1713.36	1432.34	19543.5	59987.2	3160.32	29025.5	1675.05	8093.55	1653.57
P00493	0	0	3090.18	0	6894.35	7360.92	8320.28	6562.66	0	0	0	0	8202.59	6448.9	5984.4	5547.96	0	0	12553.2	0	9563.19	9363.06	9447.26	7642.74	0	0	0	0	5814.15	7600.23
P00848	0	0	11697.7	0	322.413	554.803	425.34	2345.47	0	0	33055.2	0	1500.33	1248.49	6857.95	711.338	0	6276.34	0	0	933.902	622.01	876.539	8642.25	5529.4	3154.16	4443.76	1727.92	6765.25	806.554
P00920	18504.8	19036.9	15700.3	25778.5	9664.87	13937.2	13365.3	5897.71	23792.6	21206.5	20126.7	23910.7	10044.3	19332.9	12867.3	7202.65	9690.64	10404.3	0	13537.8	6110.16	7118.62	8793.85	6339.28	5791.45	5361.6	6739.63	5042.58	2770.21	2612.78
P01027	0	0	11005.7	0	0	0	0	0	0	0	0	0	0	0	6208.64	0	0	0	0	0	0	0	0	0	0	0	0	0	0	0
P01786;P01787;P01788;P01789;P01790;P01791;P01792;P01793;P01794	0	0	0	0	0	0	0	1116.33	0	0	0	0	0	0	2416.16	0	0	0	0	0	0	0	0	0	0	0	0	0	0	0
P01831	0	0	0	4340.2	8407.71	3221.71	35538.8	4086.29	2809.87	3739.61	4322.98	14936.7	5848.05	6174.6	7861.05	2933.73	6689.87	5997.92	0	9961.04	1486.94	1370.99	1414.71	1071.83	5941.88	4609.07	4154.68	6058.33	1152.11	1234.25
P01867;P01867-2	0	0	0	0	0	0	1245.4	1137.58	0	0	640775	1.3303e+06	753135	431577	222076	37905.8	83666.6	97332.8	27913.6	57680.2	2102.46	3161.79	3236.88	1333.91	3435.19	0	4118.76	5075.88	0	771.644
P01887	5414.65	11828.5	7420.37	10055.3	2290.57	1648.62	5254.27	1502.85	6781.46	7239.22	10006.5	10451.6	3038.03	6073.79	7023.9	2706.05	4315.58	8067.59	4539.99	4265.34	0	675.107	470.384	0	23840	29394.6	23193.5	21264	4993.67	4585.27
P01899	1040.92	1513.91	893.065	0	738.707	306.362	4147.15	420.225	0	1746.4	2674.36	5186.66	2113.47	1347.34	1499.88	779.108	0	1765.88	0	0	90.1314	134.297	115.071	0	15399.4	15807.9	12775.9	10978.8	2722.22	2106.03
P01901	0	0	0	0	0	0	9315.62	0	0	0	0	0	0	0	0	0	0	0	0	0	0	0	0	0	16898.1	14051.3	13824	9531.6	4951.01	4496.98
P01942	48417.8	179037	23071.2	17505.5	13503	9546.43	6151.55	7795.01	140398	212164	96744.3	720432	239669	134072	82958.3	45078.2	62710.1	95457.6	28092.4	89633.2	8466.55	6187.2	10394.1	4669.92	90877.4	120444	301231	133159	30874.4	25810.6
P02088	20766.8	83508	9440.07	15594.6	5714.46	3868.87	2672.44	1808.87	55200.5	93778.2	61946.6	302678	110219	64752.6	33307.4	16675.1	44194.9	39380.1	34234.8	17834.4	2949.72	1177.1	2999.62	2826.15	36183.1	49224.7	124111	90676.3	13542.6	14235
P02798	0	1463.01	458.37	1319.23	0	0	508.963	257.246	0	0	1325.71	0	454.977	0	416.669	912.314	0	737.642	0	0	255.356	175.105	153.192	164.625	758.849	1676.02	1521.06	1056.48	597.731	323.846
P02802	2773.64	4603.9	2514.5	4409.88	1034.43	218.485	1919.64	906.546	0	3595.69	2430.32	4473.74	929.339	1948.21	1078.52	2182.01	1807.6	2179.16	1081.1	0	981.796	649.435	739.855	596.507	2232.2	4049.86	4811.59	2995.02	1355.83	931.599
P03888	5740.04	0	160145	2605.83	2129.83	4028.77	2546.54	2330.76	13038.8	5497.3	234797	0	14406.7	5190.19	37738.3	2694.71	9521.53	76502.6	9429.07	0	4145.35	5025.93	5902.75	150035	206184	24522.2	121582	7516.4	110048	6519.39
P03893	0	0	18295.7	0	0	0	446.321	755.492	0	0	58459.5	0	3947.41	1896.08	5865.99	1486.37	0	22233.5	4290.85	0	1542.17	1258.67	1224.97	23265.4	16087.9	7377.41	11119.1	4427.19	29694	2672.1
P03899	0	0	17477.5	0	0	1373.56	972.735	866.283	0	0	72317.8	0	3088.92	0	4668.42	0	0	22205.5	0	0	2480.27	2605.35	1881.39	22759.5	25269.2	5308.77	20192.6	2511.72	19074.4	2086.63
P03903	0	0	0	0	0	0	0	0	0	0	0	0	0	0	0	0	0	0	0	0	0	446.688	198.616	595.388	573.025	0	664.168	0	571.505	115.644
P03911	5038.98	0	65204.2	0	3866.7	2104.94	785.893	1465	8012.69	0	150302	0	10788.6	2255.78	20279.9	1331.94	7679.71	43059.9	5370.67	4473.78	3527.4	3131.38	2859.68	89730	136067	10688.4	71424.7	3830.97	81335.9	4250.66
P03921	10335.8	9646.88	264747	6025.07	2474.25	4997.3	2814.05	2558.41	28518	24350.9	304519	3261.69	19635.8	7127.04	52450.8	2835.08	22150.3	138934	14191.4	7015.56	5254.08	3800.55	2698.41	246913	570150	23527	261642	7030.16	100907	5892.5
P03930	0	0	17578.2	0	0	826.016	0	0	2626.1	0	83292.2	0	5455.93	0	10708	0	0	19552.9	0	0	1908.68	1397.56	2243.5	11476.7	13628	4278.79	13626.9	0	5865.29	2627.78
P03995;P03995-2	411374	5890.36	8320.43	11712.9	1814.45	1920.25	5122.61	4640.32	6365.32	6542.88	6476.48	9565.02	2694.33	2902.16	1804.79	5008.85	6684.15	14003.5	780829	160693	274.798	861.484	2314.95	1293.93	16473.6	7559.9	937.063	17700.5	1238.7	2203.52
P04247	0	0	0	0	0	0	756.4	0	6405.43	0	6265.77	62687.3	24716.8	15910	14450.1	4640.06	7173.81	13214.6	1549.78	0	72.3591	171.756	591.651	113.946	0	0	1281.96	1830.33	0	1
P04370-4	1.86319e+06	956250	710940	1.654e+06	448044	286668	207408	136138	1.88011e+06	1.24471e+06	1.90912e+06	2.44172e+06	285636	1.73209e+06	834110	193732	392053	412469	405953	1.12335e+06	51624.4	107826	90634	62317.3	99009	128992	102724	130014	44760.5	32885.1
P04443;P04444	0	0	1645.57	0	865.795	178.155	0	0	0	0	0	5657.53	0	6069.14	0	302.912	0	8682.75	0	0	0	698.688	0	0	4263.87	0	0	0	0	0
P04627	0	0	0	0	5144.5	6299.9	8552.07	4498.42	0	0	0	0	4573.71	3598	4047.53	2278.64	0	0	0	0	2422.12	2632.74	3599.37	1303.49	0	0	0	0	2675.2	2015.49
P04925	1452.14	1602.83	0	1221.37	1370.73	975.01	10616	1613.14	0	2529.77	1481.23	1791.44	929.055	1005.55	1483.6	726.443	2002.54	1344.66	0	2935.86	450.883	433.05	340.29	346.583	1291.6	1728.25	1399.22	1565.4	432.579	398.836
P05063	16897.5	20773	14024.9	17932.6	22124.2	46060.9	44792.7	25903.6	16130.6	18170	11907.2	13158.9	20782.4	17331.3	22177.2	15606.5	9016.82	11021.2	36151.2	7426.73	25024.3	29327.6	30412.3	21680.8	9203.68	11038.7	11851.9	10549.5	11557.8	11621.3
P05064	54733.4	56020.5	32990.4	43970.1	75212.6	92158.1	85781.1	65968.1	50620.5	43770.4	32295.8	32286.5	84581.8	77599.1	95165.2	64550.8	47109.3	43330	59285.8	48834.8	131241	153349	183639	133935	27813.4	30447.7	28722.4	33841.8	71684.1	91976.2
P05132;P05132-2	0	0	0	0	3233.58	2380.78	4668.31	3717.14	0	0	0	0	2495.01	1970.99	2143.83	2195.27	0	0	0	0	4357.19	4672.98	4952.83	3265.91	1558.62	2139.06	1328.65	2062.99	3936.47	2949.46
P05201	34137.1	32288.9	23221.9	33366.6	13732.4	15247.1	14592.3	10740.1	35269.9	36079.5	26061.7	32163.5	14501	26311.7	16302.9	14845	26949.2	26376.7	19882.9	26084.2	20780	20337.5	22012.8	15322.4	14892.2	19127.3	16934.6	15258.8	12369.3	12577.5
P05202	74198.4	71441.2	52265.6	87063.5	20419.1	28313.4	22985.4	16552.2	85710.2	84784.3	63724.3	90152.9	26621	37349.3	30885.1	27618.6	67202	68090.8	45104.3	93497.7	18703.6	21407.7	24175.1	17609	87199.1	103097	100837	96646.1	37360.4	30306.4
P05213	133980	115708	102891	114946	1.06579e+06	1.13027e+06	995806	1.07803e+06	174659	170004	112795	127173	614746	498458	576861	789372	108569	76618.4	126034	115322	448388	414001	471775	333430	50348.5	73911	60048.6	58447.6	231480	308545
P05214	49783.6	61696.3	37897.9	68586.1	338902	258621	287093	227312	91649	88870.9	56761.2	61140.3	138464	188688	153621	130721	58732.7	47076.8	55297.6	52506.4	108458	98502.7	98936.5	90211.2	33567.7	40824.8	38171.2	36448.1	56850.6	73738.1
P05555	0	6810.61	6094.24	6834.74	743.229	937.193	867.609	1258.98	6308.95	8042.47	5516.85	6340.07	1480.18	1803.76	1560.6	2118.57	3316.67	6777.18	0	0	539.575	598.538	200.988	556.796	34290.6	36265.8	38534.4	32665.9	7574.47	6561.57
P06151	15604.6	22351.5	106707	17974.9	38802.5	42981.6	53156.9	43167.2	32191.1	30114.4	123493	20577	33744.8	29164.6	49909.5	34468.1	30224.7	71343.8	12891.2	31572	70379.1	66647.3	72006.2	121696	60447	24909.7	39787.6	20768.6	62593.7	60073.9
P06745	13164.7	11073.2	9995.56	12617.1	6455.83	6661.6	6271.23	4797.84	13325.9	16299.5	10864.7	10960	7172.53	7582.05	7171.9	7408.82	9490.7	14012.6	5176.83	13346.7	9626.81	9939.01	10020.6	9048.93	9839.92	11041.9	10989.2	8493.18	8735.5	7963.97
P06795;P21447	0	0	0	0	0	0	0	0	0	0	0	0	0	0	0	267.742	0	0	0	0	960.356	674.876	392.963	846.228	0	0	0	0	0	0
P06801	20283.3	6527.44	13038.6	5750.39	2052.56	2072.73	2262.51	1971.24	8589.94	6913.81	6028.09	7807.61	2345.73	4104.75	4755.16	2166.14	6697.16	6867.98	23431.4	14653.8	1905.93	2120.91	2308.04	2264	5316.4	6540.21	3036.49	11576.5	1915.19	2534.81
P06837	0	6217.93	3019.07	3905.22	1353.53	975.364	1163.11	1607.55	7739.15	0	4243.9	0	3036.11	3638.94	2757.27	2497.41	3956.11	3004.71	0	0	5509.74	8346.94	6930.48	2835.04	1974.55	2983.09	2512.28	5295.28	6627.89	7035.75
P06909	0	7242.59	0	9303.1	0	0	0	1225.04	0	2669.36	1324	0	935.923	753.889	0	1773.73	0	1556.34	14498.9	0	456.279	848.924	348.853	326.547	6962.25	9540.59	8799.12	8480.61	1745.1	1662.75
P07091	11040.7	0	0	0	0	3191.44	1328.17	6843.65	0	0	13975.8	27213.6	3279.64	6369.65	29651.5	1485.98	4404.2	4620.31	19578.2	9754.86	184.032	0	445.267	331.187	1623.98	1980.82	0	2657.42	0	251.611
P07146	558992	294453	328498	277424	63835.4	61064.3	83199.1	45267.8	357866	217960	247680	292075	77381	94352.8	154375	46494.4	97453.8	117850	163538	237083	11187.4	23593.2	22948.3	7774.83	35652.2	75044.6	51387.2	53792.7	13348.6	10315
P07214	0	3174.31	2565.68	5208.43	927.387	1728.99	1171.83	1335.58	3503.49	1903.91	2710.12	4098.5	3150.13	2958.22	5691.7	1123.7	1418.44	5086.8	0	0	744.297	1260.32	776.486	497.107	40732	62466.6	46214.6	40434	7747.25	9470.7
P07356	216614	23011.7	109171	41911.5	7487.87	12108.1	10122.7	14649.6	22386.3	9613.75	36473.2	70207.1	8240.9	11418.4	44837.9	13374.2	92564.6	34829.6	521174	141972	823.186	2743.81	8716.9	4554.56	27959.5	33006.7	11499.1	62109	6691.88	5335.01
P07724	4118.23	4626.67	3621.69	0	2006.01	2325.87	2566.73	1253.28	10712.1	2606.58	20179.6	120766	45216.6	36698.3	29896.1	7762.82	13763.6	45394.7	5245.01	12668.4	381.922	723.367	604.441	656.549	1881.27	1719.05	4006.74	5373.91	513.286	1117.07
P07758;P22599;Q00896;Q00898	0	0	0	0	0	0	630.814	0	0	0	0	13465.1	5478.18	4442.27	4370.38	1217.8	0	0	0	0	0	0	0	0	0	0	0	0	0	0
P07901	8919.13	12590.7	19191.4	11448.8	138626	144502	169703	143574	11443	12876.3	10476.7	10713.4	43845	25678.2	33422.5	55169.4	7158.26	7894.43	15567.1	9681.02	35490.5	36923.4	34488.2	31709.7	4668.6	5306.19	6059.69	7279.23	26976.7	33792.1
P08003	5886.59	6883.4	3394.56	5303.53	1554.93	1255.96	1238.98	1615.12	7918.1	4688.07	6394.07	4710.98	1814.15	4209.99	1751.46	1544.07	4523.89	3392.93	3236.47	7173.76	792.366	609.12	1672.73	437.93	37443.6	44303.5	36887.8	41009.2	7117.89	6255.72
P08071	0	0	0	0	0	742.035	500.91	12528.3	0	0	0	0	0	0	84143.9	137.791	0	0	1789.36	0	0	264.649	473.221	0	0	1988.12	0	3769.8	291.531	114.514
P08074	7494.99	0	0	0	0	1290.91	0	0	0	0	5463.66	30603.9	6802.58	3685.4	2012.72	722.63	0	6070.28	3515.34	0	0	0	22.9516	637.995	0	0	0	0	0	0
P08113	43126.7	85296.5	54567.2	78109.2	11743	12055.8	9659.28	14390.6	60134.6	94464.6	52684.6	61957.1	24769.4	20915.9	15607.6	28725.3	56528.6	58915.5	58569.7	44483.3	4482.04	4017.17	4071.62	3985.84	560750	730889	605977	656804	120096	114732
P08121	0	0	0	0	0	0	0	0	0	0	0	0	0	0	0	0	0	0	0	0	0	0	0	0	7089.03	0	0	258.409	72.1187	1
P08122	0	0	29468.2	0	19950.5	1402.7	0	2189.2	0	0	0	0	0	0	0	13170.8	0	2659.26	0	3154.62	20540.4	2016.96	24162.2	19900.9	1952.76	0	1838.33	2787.32	10180.6	13492.2
P08207	0	0	10048.2	0	0	0	0	0	0	0	0	0	0	0	0	0	0	0	91663.6	0	0	0	0	0	0	0	0	0	0	0
P08226	0	0	0	0	0	373.978	125.195	0	0	0	0	0	614.873	1310.75	1322.5	109.101	0	0	0	0	513.592	303.499	0	396.209	0	3340.21	0	2126.7	703.628	287.991
P08228	0	0	0	7780.56	2027.79	2859.89	4367.69	1039.15	0	5620.64	15625.3	47512.4	26311.5	23858.1	21887.8	4823.85	11493.7	36992.6	8238.55	27847.3	3367.21	3639.58	5384.62	2555.67	2877	2414.04	2732.34	4161.61	1793.43	2357.84
P08249	57830.1	83755.6	60487	78499.9	22144.1	26090.3	34743.5	19528.6	63333.4	89096.5	61604.6	72243	25601.5	43649	29571.3	37741.5	68026.8	84641.9	76345.7	50830.4	30951.4	25320.4	30289.9	31927.2	89934.8	125617	115746	93929.5	46384.9	48604.4
P08414	3440.33	3157.38	0	2711.78	3217.81	3141.3	4690.86	2889.36	5101.36	3749	3043.45	3761.81	2786.09	4990.12	2525.43	1686.29	7985.89	3635.47	8093.22	9632.24	3752.65	3965.26	4436.68	2858.61	1745.42	2250.12	2093.47	2139.79	1249.19	1448.24
P08551	9026.8	10369.1	10488.6	18270.7	30396.3	102427	126494	35146.3	13129	10352	13956.7	16876.1	35522.3	18728	17791.1	12212.4	2330.34	3219.71	3265.88	5880.73	4079.57	6618.94	7645.65	2828.21	0	1893.03	608.708	1400.82	785.263	418.381
P08553	36180.9	34535.8	28746.2	52354.1	30190	87727.8	103657	30965.5	41881.5	28753.4	44930	51494.1	32950	27063.9	20391.1	13239.6	4983.05	9251.67	11662.1	21417.3	2442.03	4394.9	4866.8	1850.37	2486.46	1957.65	2256.06	2731.47	880.484	643.24
P08752	15620.5	13056.9	14928.8	12844.8	27144.1	21800.2	25974.1	20686	20710.7	21384.4	17266.8	10850.7	26577.5	17875	28608.3	15217.3	14768.8	16345.2	16756.7	19833.7	18563.9	18512.7	20566.7	18870.8	22349.1	20816.3	21562.2	22702.7	15847.6	16808.4
P09055;P09055-2	0	0	0	0	0	0	2658.38	895.797	0	0	0	0	0	0	0	0	0	0	0	0	0	0	205.073	0	0	3544.58	2583.08	3398.15	681.414	583.729
P09103	8909.65	10611.2	12424.8	10876	2295.42	2485.54	2954.06	3158.14	9385.54	12916.7	7984.16	15621	5054.05	4319.98	6847.72	3453.92	8998.71	7581.42	19090.7	10276.1	1161.05	906.302	1080.96	836.918	64462.8	76494.5	64312.2	76170.9	14185.4	13603.8
P09405	7977.77	6017.46	12031.1	10148	2862.12	2041.47	3087.45	1628.95	6856.62	5808.34	8357.83	15387.5	3932.87	8155.52	4957.29	2185.33	5252.63	6132.08	10024.9	8336.89	734.503	1133.01	1349.32	600.592	0	0	0	2741.08	0	0
P09411	15851.4	16069	19173.2	14657.6	6598.36	8680.18	10685.2	6096.13	16003.1	17691.9	19151.8	19541.7	8423.55	16268.4	13474.5	8195.39	14827.6	13366.3	40566.7	15292.5	11854.4	11945.4	12405.1	9582.55	7277.94	10493.2	8244.47	6850.56	8437.12	9229.47
P09528	12534	8186.85	7726.46	2598.61	7260.66	7529.61	9501.6	2178.99	4206.46	4874.46	2378.84	6662.1	3165.04	2964.93	3434.76	4025.47	3606.68	2392.81	4637.4	0	6490.47	6633.06	7373.25	5695.65	2545.15	2923.17	2855.35	3204.41	3347.6	3539.75
P09541	0	0	1266.38	0	0	100.383	0	0	0	0	3611.4	33565.6	14435.1	11564.5	9785.35	2278.72	5780.24	11257.7	3454.04	12109.7	402.799	631.159	676.56	145.436	0	0	0	5642.82	203.105	227.778
P09542	5925.81	4526.48	3960.71	2984.76	1356.25	929.609	2106.35	769.106	8685.45	2513.01	47082.9	562297	283916	252993	240843	58849.4	133481	237602	96126.4	293720	8232.77	10544.9	14327.8	2494.55	9883.66	8485.16	9243.61	9563.97	1459.85	1197.71
P09581	0	0	0	0	0	0	301.575	0	0	0	0	0	0	0	0	142.823	0	0	0	0	85.6074	0	0	230.842	7515.46	9231.53	7040.27	7065.38	1470.4	1763.58
P09671	17662.9	19809.9	15281.9	19624.1	5144.68	8261.33	8665.68	3436.24	16312.8	20500.9	21081.1	34445.2	10452	13653.8	12499.6	7853.23	17784.6	16222.6	14191.6	29392.2	4536.14	4421.49	4942.48	4089.62	17154.7	23365.2	23890.2	20893.8	8771.12	7569.83
P09813	0	0	0	0	0	0	0	0	0	0	0	19589.6	8079.83	4963.06	3488.81	911.353	0	3960.33	0	8130.2	0	273.127	295.227	0	0	0	0	0	0	586.725
P0C0S6;Q3THW5	0	1341.96	0	2635.55	0	361.069	0	578.129	3135.31	2557.08	2455.56	7585.71	1043.16	3468.18	7622.77	1312.01	4989.43	3250.62	0	0	0	810.307	644.721	415.48	3667.2	0	1817.01	4160.67	302.507	426.547
P0C7L0;P0C7L0-2	0	0	0	0	325.69	545.653	1051.42	529.37	0	0	0	0	2953.38	565.233	0	404.367	0	2816.78	0	0	3709.85	5027.54	5802	4455.8	0	0	0	0	2386.57	2790.79
P0CG49;P0CG50;P62983;P62984	303618	111166	179708	96632.9	54434.3	89239.8	82138.1	62128.3	135229	71936.7	119982	238988	109444	80936.6	147723	100227	132977	96986.3	588207	313685	95494.7	101406	71223.2	78914.6	69056.9	165108	56111.9	133242	40724.3	44261.4
P0DN34	3976.09	0	3217.75	6285.35	2160.73	2683.65	2970.36	2304.28	0	0	5467.87	0	2627.69	1616.38	2583.13	2497.24	0	2477.75	0	0	2191.92	1231.7	1579.12	3527.29	4320.6	3093.99	6267.21	2181.71	1900.2	1158.06
P0DN89;P0DN90;P0DN91	0	0	2160.7	0	0	0	0	0	0	0	0	0	0	0	0	0	0	0	0	0	254.974	0	0	2039.45	1611.34	0	0	0	367.138	0
P0DP26;P0DP27;P0DP28	13865.1	12408.8	39662.5	20504	46285	74735.6	147494	37001.1	20096.7	11516.8	34671.2	32409.3	32571.6	47154.2	62345.8	22192	31534.8	28191.3	168340	40446.6	16193.1	23145.7	31064.5	15328.5	12189.4	10357.8	9480.21	19636.3	19201	25965.1
P10107	4985.5	0	55034.4	0	2261.2	4070.58	4278.49	7009.4	0	0	4034.3	10891.7	1785.84	1847.86	14603.9	1361.13	3636.51	0	18285.2	0	2837.2	5034.26	6554.43	5766.3	0	5424.39	0	9695.7	1781.01	3389.22
P10126	123483	74515.6	273010	95087	113126	103771	113661	103480	106319	88677.8	93922.3	144912	64638.9	82114.2	84899.9	59349.2	194778	71706.7	315348	115375	42864.3	45753.6	50346.6	40943	36290	41846	34002.8	93209.6	24460.5	26784.5
P10518	0	0	0	0	0	1393.29	2922.34	0	0	0	0	0	0	0	0	0	10700.5	0	29189.4	8687.97	0	401.006	672.985	0	0	0	0	4789.49	0	535.818
P10605	4134.75	0	0	7331.48	0	1098.37	960.216	930.285	0	1866.97	1347.01	0	2277.9	1220.98	524.413	2664.53	10982.8	4277.06	0	0	866.324	326.468	405.293	567.625	14007.8	19916.2	17322.8	14836.5	4283.59	3123.55
P10630;P10630-2	0	0	0	0	22097.4	23863	38690	20293.9	0	0	0	0	8147.1	3458.04	11003.1	7499.68	0	0	0	0	2612.25	3023.87	3330.63	1979.45	0	0	1517.72	517.209	2464.44	1066.7
P10637	18672.7	15523	10355	19432.9	67577.6	108361	93605.4	55973.1	26983.2	16293.4	15591.6	22181.3	80475.1	122395	100829	56425.6	11267.2	12537.9	7371.85	19660.8	106222	147790	184005	89872	11493.4	18753.3	13131.8	12531.3	60634.9	71039.8
P10637-2	0	0	0	0	6561.72	8464.95	8207.26	4745.99	0	0	0	0	9259.44	10596.8	10281.3	4529.26	0	0	0	0	12790	16773.6	20643.4	6042.45	0	0	0	0	5697.3	7533.74
P10637-3;P10637-4	0	7037.22	5953.59	10882.3	35546.1	16412.4	24879.7	10368.9	14033	9141.31	9819.11	13065.1	19405.1	30400.8	26451.8	14426.5	6897.16	7498.23	8367.96	11370.2	24915.9	33855	40048.3	24718.7	7800.94	5484.14	8799.76	7529.47	13691.6	16804.6
P10639	136980	35038.9	48065.3	57265	8110.79	11241.5	13766.8	6501.74	31870.4	11193	27428.2	45633.9	18359.2	18976.8	28916.9	29189.6	56535.9	27360.3	203451	194982	11185.5	13487.7	16039.9	10189.9	23262.7	28102.2	9198.8	98441.5	10573.7	7822.34
P10649	13917.1	11961.4	23819.8	17310	9584.05	13100.5	10304.2	6082.44	14892.7	14727.3	19478.8	14377.2	12253.6	12056.3	16960.7	8803.38	9263.23	12860.8	7878.22	11486.7	6540.7	7594.04	9476.34	8685.6	13393.6	12670.9	13739.4	9559.93	6338.46	5392.49
P10751	0	35598.6	25009.4	38434.3	79467.2	72055.1	99525.9	92617.7	37376.1	0	10108.5	24601.9	37107.4	30534.5	30793.2	55921.4	35077.9	43718.4	24639.9	24893.5	76905.8	65797.3	0	61560	51613.8	65286.8	68465.1	55237.7	83828.7	91746.3
P10852;P10852-2	6138.27	5867.3	4153.16	6486.71	4286.45	3653.79	3882.65	3625.26	6743.28	8289.66	5621.21	4854.4	3982.84	4366.43	2832.19	4669.17	3276.97	4147.89	0	0	8537.6	7891.18	8003.85	8507.88	9750.02	9116.95	9751.75	8518	6373.39	8137.03
P10853;P10854;Q64475;Q64478;Q64525;Q6ZWY9;Q8CGP1;Q8CGP2;Q8CGP2-2	68576.7	137453	242655	81279.1	20394.4	11377.7	19364.9	50497.5	94875.5	140076	109556	394866	73377	115018	315743	44045.9	142692	167688	139448	83588	8442.2	15626	12644.2	8456.3	177477	164861	122789	155270	19522.6	24639.3
P10922	80930.3	45986.2	33208.9	59293	35245.5	11128.2	15048.6	18205	141264	34528.3	54876.2	83742.1	18370.9	40254.4	30095.6	9417.44	18087.5	15387.5	29057	37290.8	2223.31	4520.31	4423.97	1421.67	15467.7	18232.4	20081.4	13149.1	3953.06	3353.8
P11087;P11087-2	12240	16562.9	16214.5	7445.77	6618.33	3366.36	1098.32	1918.56	10113.3	3793.48	16109.2	73530.1	55325.9	29328.9	29300.1	12679.1	26210.1	55183.7	18726.9	37785.9	1111.94	1201.31	1463.22	867.553	119988	3498.95	3052.04	4106.37	1122.79	598.766
P11247	391084	246740	79162.4	257154	120639	83408.8	96751.7	23708.6	466698	289404	383806	288839	110863	145018	54515	34378.8	191785	149628	186942	631815	15449.2	20354.8	17521.5	11476.7	64932.3	17877	57373.9	193060	16968.5	13603.1
P11404	0	0	0	0	0	0	700.216	0	11839.2	0	5706.58	41238.2	16348.8	17952.5	14784.7	3188.11	7544.77	13334.3	3883.4	7496.08	658.98	1016.07	1240.01	2552.91	1878.13	0	1249.17	1806.19	459.205	401.932
P11438	22802.6	0	9528.54	7973.82	2579.4	3534.56	4694.91	3083.3	0	0	9463.92	11791.9	2849.43	2835.36	3568.45	5815.4	0	4502.22	63430.6	17132.1	520.755	711.429	1556.43	953.858	0	5968.63	2697.37	13908.3	914.354	1123.84
P11499	17526.7	37294.8	101690	33437.2	320289	355624	435739	373906	25223.5	43999.3	32821.1	45530	115506	72770.5	95542.3	166219	22090.1	38160.1	59589.9	25530.9	70697.4	81935.4	69699.9	58416.9	175183	229824	199815	189768	82159	94100.4
P11627	2494.93	2650.97	0	3124.06	5132.46	1988.58	36041	6539.73	3135.35	2603.6	0	2090.5	4542.99	3708.48	3746.98	2621.8	3880.99	1528.04	0	0	5512.55	6485.1	7219.66	4327.3	2704.24	3037.12	2717.1	4699.73	3199.67	3346.33
P11798	21107.2	15195.9	11452.2	11992.6	7460.33	7055.43	6264.23	5758.48	22350.7	26959.7	16341.8	10605.5	6429.04	7341.94	5309.51	9958.06	35334.5	25195.4	18805.7	40523.1	12324.9	12260.8	13253.3	13086.3	20686	21241.3	20657.2	17036.8	11007.8	9458.37
P11835	0	0	0	0	0	0	544.732	240.025	0	0	0	0	425.934	0	522.76	0	0	415.526	0	0	286.263	482.348	0	1	3619.57	4842.31	3471.08	3049.81	828.879	695.431
P11881;P11881-2;P11881-3;P11881-4;P11881-5;P11881-6;P11881-7;P11881-8	0	0	0	0	390.012	2349.31	4353.87	1118.55	0	0	0	0	5948.53	1169.89	0	1577.91	4766.73	4425.6	0	0	2498.96	2319.54	1865.62	2102.28	5521.46	5371.13	5045.18	6419.11	2187.31	1881.58
P11983	1939.46	3217.23	8058.22	3530.22	12245	11559.5	17594.4	13161.8	0	0	2968.65	17352.3	6124.39	3491.78	7596.11	5683.04	4574.74	2372.56	10578.2	0	6481.56	7536.03	8709.91	6676.13	1677.36	1505.46	1465.39	2079.93	7205.68	8845.18
P12023-2	0	0	0	2559.87	2641.56	2967.08	6988.77	2654.43	0	0	0	0	3253.73	987.222	3235.04	2714.64	870.164	0	0	0	1315.04	1411.69	1620.68	1141.49	7379.1	7969.65	7452.18	7293.78	2341.7	2266.46
P12265	0	0	0	0	0	0	0	0	0	0	0	0	0	0	0	593.072	0	0	27496.6	0	350.589	0	0	0	821.392	964.117	760.787	994.588	88.6239	0
P12367	0	0	5583.6	4501.28	2447.7	2343.5	2307.94	2576.18	10465.2	1422.2	1877.81	3786.24	2126.79	2972.65	1960.08	2040.49	0	1700.51	0	6165.24	1892.62	1843.69	1909.35	2033.85	1946.49	1166.35	0	5400.76	1978.74	2349.51
P12382	0	2110.66	26023	1805.68	2553.79	2879.23	2638.43	3512.94	0	2424.82	0	0	1431.35	2530.77	1703.73	2103.76	2578.54	1786.79	6096.25	3481.04	3020.74	2675.98	2488.91	2945.23	1583.58	1624.37	1676.2	1864.75	3521.9	4300.85
P12388	17346.2	0	7982.83	0	0	625.481	1152.14	967.699	0	0	0	7000.99	0	0	1483.78	877.162	10814.3	3518.69	22740.3	13145.2	0	0	604.149	332.759	1592.4	3070.8	0	3491.89	733.472	461.697
P12657	0	0	0	0	0	0	0	0	0	0	0	0	0	0	0	0	0	0	0	0	2081.48	0	1170.92	1271.16	0	0	0	0	0	569.734
P12658	0	0	0	0	7232.19	4897.25	6483.66	3593.35	0	0	0	0	8277.54	7227.5	3819.26	4292.41	4071.43	2283.53	0	0	6694.95	5566.88	3683.93	2802.57	0	0	0	0	2236.08	5584.3
P12787	0	21620.4	10519.1	11772.2	4477.99	5851.46	3640.69	1491.07	25140.9	24992.6	16272.8	99711.9	33979.7	29303.4	21732.5	7111.81	22889.5	19991.6	37832.1	49629.9	2246.8	2619.43	3200.49	2910.39	11705.5	14444.1	15256.3	17421.7	4866.61	3973.39
P12815	0	0	2604.83	0	2752.24	4242.38	5910.92	3071.48	0	0	0	0	5263.28	3784.94	3873.64	3288.3	1341.54	0	14118.4	0	10002.1	14037.5	17142.6	9709.11	0	0	0	2035.35	3623.17	3920.58
P12849	0	0	0	0	4943.02	3964.43	4966.99	4843.53	0	0	0	0	2032.55	1506.98	1861.09	1438.81	0	0	0	0	1660.8	1655.3	1619.3	1153.41	0	0	0	0	1172.04	1253.12
P12960	5327.62	6195.8	3790.86	7390.96	16961.2	3293.3	101249	19005.6	6804.97	9941.6	3996.56	6740.88	8116.2	3352.69	6732.13	3432.25	5472.64	4813.02	65255	6853.8	3734.35	2763.56	3193.44	3152.91	6572.79	7785.42	6745.51	7716.25	3171.69	2975.52
P12970	115070	135547	87002.8	143255	27611.1	24044.8	24086.8	17852.2	138436	129033	83354.3	109839	41670.4	55142.7	20242.7	26115.7	86757.2	43548.1	73126.2	145582	3956.62	7934.55	3062.9	3509.83	25074.9	40835.5	33923.2	34947.2	7167.18	3612.89
P13020;P13020-2	9489.32	0	5557.27	719.798	2093.9	1093.76	882.216	1822.9	0	0	4617.63	2775.76	3055.24	0	10091.9	498.527	6622.49	792.969	17621.1	5951.2	406.9	587.494	628.755	442.934	1272.31	2995.63	0	5687.09	349.278	565.45
P13595	2860.48	9759.08	3228.93	7410.05	6541.32	3009.25	45745.8	11580.9	6215.05	7632.13	7550.14	4497.08	4917.68	2699.66	2922.5	2994.61	3501.94	3864.77	4593.4	6499.02	2440.16	2120.38	1700.7	1559.08	5694.04	7999.81	6639.85	7187.33	2387.39	2303.29
P13707	13975.9	12792.5	17267.9	7896	4405.29	4564.19	3894.27	2445.16	0	4618.97	20976.4	3130.45	4323.39	4880.08	10708	3276.96	5213.14	6465.69	9080.75	0	3952.96	3721.57	4102.68	6858.69	1889.17	3180.37	4470.65	1052.61	2013.45	1966.05
P14069	11705.4	3000.14	51886.9	2970	0	3230.95	1569.9	10763.2	4858.61	3181.58	39031.4	42501.1	13149.9	21881.4	38948.6	4002.25	10817.5	26078.3	179677	14353.2	461.085	844.379	931.442	1277.89	0	3663.54	0	6986.63	0	368.901
P14094	51204.7	59445.3	47758.7	54643	50474.9	46158.4	146674	50335.6	52087.7	74931.4	57028.1	54375.4	39086.5	39042.3	39096.5	43724.2	55678.6	51498.2	33279.9	54138.5	84909.9	74423.3	63307.5	81851.9	91598.8	89208.3	101490	85748.6	61452.8	61567.6
P14106	0	3296.29	0	0	0	0	0	0	0	0	0	0	0	0	0	490.288	0	0	0	0	0	0	0	0	7383.09	10000.3	9118.9	10238.9	2194.17	1785.47
P14115	183889	162394	81690.3	144860	36743.6	23107.5	26630.2	25311.3	195272	132589	96895.9	139230	38920.4	40001.1	11856.5	28491.1	69889.6	39522.9	78949.9	134248	5456.9	6405.49	3248.25	6262.47	33863.2	44474.4	37080.5	49296.8	9218.67	5695.9
P14131	22887	9216.95	26379.3	15748.4	6622.11	5140.11	9185.74	3352.22	21953.9	11738.5	18583.7	27985.2	4665.29	36989.9	13149.9	3024	7922.1	8737.77	16521	13916.7	1857.52	1961.55	2290.14	2026.27	1981.29	2616.03	6836.19	7271.98	3780	458.374
P14148	71339	66344.7	47976.9	69420.3	12286	13941.5	14364.3	9888.82	71023.7	89182.2	43810.6	60237.9	20534.9	45280	48638	25150.8	64281.4	73701.5	49249.8	90576.8	9692.91	7760.98	8402	9213.02	14810.9	27747.6	21640.5	19227.1	5989.61	5145.1
P14152	20655.5	22876.7	46998.3	18508.6	10732.8	13505.9	16533.5	8499.58	26171	22935.4	51875	25255.3	15243.2	13974.4	32832.8	12816.7	29505.4	25662.2	24599.8	16598	17097.7	17559	17890.9	28977.1	14432.6	13072.4	16139.2	11366.2	12524.4	11379
P14206	0	0	20801.8	4386.66	6736.39	6647.35	16505.4	4994.77	5154.08	5240.19	2228.7	6064.56	2922.82	1997.54	5865.6	1928.98	2503.67	3200.52	16061.2	0	1037.17	971.789	1370.69	987.186	0	1478.6	0	5974.58	289.326	307.039
P14211	6312.18	6881.7	8366.14	9864.55	1263.53	2224.9	2376.07	1394.59	6286.36	7645.37	7496.19	15006.9	7599.96	3768.67	5225.24	3888.95	6526.64	7503.22	7650.54	7055.71	1105.67	1100.35	1722.66	802.489	41867.4	50845.2	51897.6	40234.7	9484.38	9688.31
P14231	15124.4	8995.86	8893.39	10401.8	8954.76	5378.62	48422.2	10703.3	8944.19	11587.2	9674.41	8337.44	5602.99	4426.34	5283.5	4984.04	5533.84	6769.61	0	0	5738.64	4272.77	3525.25	4697.83	10421	10243.9	10699.7	9436.06	4817.11	5153.76
P14602;P14602-2;P14602-3	3533.34	0	24114	0	0	748.495	3086.45	2181.15	0	0	1066.8	6075.3	0	0	8427.48	920.162	18272	1826.23	103137	0	0	349.827	271.704	333.098	0	0	0	16479.1	0	0
P14685	0	0	0	0	1407.08	1470.53	2882.3	1573.3	0	0	0	2400.18	1454.47	906.355	1683.73	1168.57	0	0	4437.66	0	948.702	1095.09	1094.46	784.473	445.657	830.442	916.977	1886.53	678.832	875.965
P14824	9294.17	8152.57	5407.83	7058.6	9151.54	9812.88	9849.9	9325.76	4910.27	6308.78	6399.02	6850.61	8571.51	7022.41	8592.87	7250.55	5730.1	5990.44	387951	4197.67	12044.7	12966.4	11780.5	11940.9	4448.04	3360.95	3195.87	3091.79	6527.29	6337.43
P14869	0	0	7421.68	0	2137.84	1608.37	4126.18	1361.4	0	0	0	0	993.611	0	2209.62	1003.29	0	0	5599.03	0	361.067	601.093	649.539	528.361	0	0	0	3652.33	277.398	0
P14873	8171.5	11574.1	6619.07	10788	71481.5	73779.5	56675.9	64884.6	12627.6	14526	10088.6	12932	110176	114314	111339	99497.3	8645.02	9098.83	6317.92	11956.7	71234.4	60125	55868.4	50917.4	5678.9	7351.33	6437.75	6065.32	18096	20674.8
P15105	21040.2	28902.1	17873.7	26727.5	10421.4	16109.9	12199.8	11203.7	22787.4	30247.6	20866.3	20787	11247.4	15224.9	9404.58	15596.5	17883.8	20750.7	10895.2	16114.2	11068.2	8743.03	11092.9	9156.12	29916	34401	31945	33459.5	10355.3	13359
P15116	0	0	0	0	6355.69	6837.4	83431.5	12415.8	0	0	0	0	1942.67	6301.54	17746.9	1921.62	0	0	0	0	1781.87	1577.26	5425.44	776.617	34928.6	1513.26	14470.9	0	1361.1	42516
P15209;P15209-3;P15209-4	0	0	0	0	2179.75	2224.99	3511.89	2331.5	0	0	0	0	924.603	0	0	948.793	0	0	0	0	527.18	186.003	168.353	535.354	3934.02	5705.42	3695.72	3580.53	505.504	554.775
P15508	0	0	0	0	0	533.565	658.353	931.384	0	0	0	0	0	0	0	482.7	0	0	0	0	524.405	448.854	421.308	285.873	0	0	0	0	0	242.55
P15532	0	2297.47	5461.28	2084.67	3475.75	4639.12	6573.68	2522.85	2449.3	0	4430.99	4658.01	3295.74	3062.98	5663.75	2033.99	3976.91	3977.08	7202.83	0	3143.29	4360.73	5472.29	4452.06	2520.55	2110.05	2117.14	1729.65	3856.56	4149.65
P15864	24873.8	21478.3	18855.5	31191.3	8856.49	8136.49	7799.53	7632.46	64105.9	17339.6	55457.2	58613.7	27542.3	43372.9	13294.7	8643.96	20570.4	50376.2	21072	50593.9	1557.83	2714.69	4365.38	968.016	6857.85	14958.1	12385.9	9215.46	2562.39	1124.14
P16045	0	0	2410.23	0	0	830.086	1102.26	623.482	0	0	20856.8	54494	20659.8	17002.3	14467.4	2838.92	10968.9	9404.36	13566.4	15001.8	609.207	480.323	1194.18	413.587	1291.6	1215.22	0	2592.12	526.015	0
P16054	0	0	0	0	2284.37	2182.18	1974.47	2505.14	0	0	0	1284.79	2812.61	2692.13	1780.23	3065.34	0	2964.69	0	0	5493.5	4980.74	5475.8	4236.04	1576.98	1621.16	1638.73	2282.33	2932.19	3859.28
P16110	6311.45	0	0	0	0	0	1303.83	781.677	0	0	3578.96	5495.45	1285.91	0	6909.79	0	31900.9	0	7982.33	0	0	0	0	0	0	0	0	2243.63	0	0
P16125	35487.4	34012.5	39954.3	35022.6	58936.6	59803.9	71255	54962.9	33233.5	42272.5	39653.6	30636	28970.4	28858.4	31019.8	32410.1	30327.1	39964.7	20789.8	20608.2	40973.9	41084	45014.7	40578.8	25260.1	24262.7	29212.7	23771.3	50434.8	48983
P16283	0	0	0	0	0	834.392	797.226	1292.19	0	0	0	0	2264.19	0	0	1096.91	0	0	0	0	2907.68	2546.04	2133.99	2466.77	4909.38	1660.79	1545.9	1096.79	1952.52	2105.9
P16330	106063	117695	109630	127153	58791.4	66187.9	52443.5	41475.1	122209	110803	120758	90749.8	50198.6	57602.4	65941.1	42800.2	48394.1	48668.3	26052.9	53695.3	28521.2	33795.2	36880	33567.1	28530	30800.1	35150.5	29323.4	19872.2	16372.6
P16388	0	0	0	0	0	2213.19	1796.28	1727.46	0	0	0	0	346.616	0	0	0	0	0	0	0	1800.66	1593.87	1645.51	1308.15	2097.19	0	0	0	1335.55	1010.24
P16460	0	0	0	0	3769.03	3165.84	3387.98	2515.87	0	0	0	0	2706.66	3826.67	3146.49	1781.99	0	1494.07	0	0	2423.43	2613.07	2658.25	1813.78	2209.45	3196.82	2979.23	0	2810.28	3568.54
P16546	15489.7	19137.3	11889.6	16670	62841.5	58955.9	63322.2	61567	19273.9	22315.6	13095.6	17849.4	42597.5	30830.9	31020.2	35377.2	17622.7	17414.1	9963.23	14800.1	34732.4	35960	32312.7	31541.2	15127.1	13955.7	13576.7	18118.6	23683.5	24180
P16675	0	0	0	0	0	0	0	0	0	0	0	0	0	0	0	0	0	0	0	0	0	0	0	0	0	3581.85	2983.37	0	0	642.867
P16858	268770	204575	221429	181766	159153	284847	277757	180241	185119	177068	144313	168685	149684	143221	135112	129818	354574	151241	697534	259698	222259	241183	262072	155526	104608	137221	118352	146872	223375	228569
P17095	8674.8	5287.01	3848.97	6785.28	1330.25	1309.1	764.434	830.145	3281.28	2448.09	7513.25	20199.4	4972.65	11076.9	7052.03	2022.52	4929.53	7496.08	5016.69	8426.19	202.271	816.902	1008.39	251.511	0	3104.02	663.358	7334.78	96.596	78.1851
P17156	0	0	0	0	1434.07	1489.17	3029.11	2116.21	0	0	0	0	1350.91	1627.75	1302.56	1428.03	0	0	0	0	3963.03	5147.13	4237.49	3074.89	1954.37	1999.14	1471.12	2416.08	2496.6	2894.61
P17182	17188.5	16207.4	19609.2	16977.9	9996.6	11631.7	12094.8	7785.93	16631.8	16535.9	14275.6	19606.3	11364.9	13269.7	15920.7	8732.22	27226.2	17409.8	45302.2	14787.4	16932.5	19236	19053.9	14576.2	11021.9	12666.3	11767.1	13550.9	11220.6	12084.4
P17183	32713.7	38603.2	29005.4	35875.2	20641.4	25659.7	25954.9	15355.8	37126.7	36396.5	31947.3	31838.3	21693.6	23470.6	30109.3	18359.1	71281	35634.5	65644.4	37291.4	30418.6	31437.1	35432.3	29462.9	21095.4	23021.3	24683.9	24794.4	20934.4	21422.8
P17426;P17426-2	25996.3	29189.4	19718.2	28040.7	17170.9	13758.9	9355.49	16635.1	30915.4	28661.8	21541.7	19415	13812.1	13392.6	13489	15757.8	31447.4	30515.9	16046.7	29633.9	26654.5	25316.9	21673.6	23734.7	35172.2	34377.3	33754.3	33402.8	31236.6	34533.5
P17427	11149.3	11895.2	6684.11	10836.1	8066.09	6616.72	4838.65	7976.49	13617.3	14115.5	7986.34	10353.6	7232.5	7620.98	5225.66	7301.63	14913.6	14829.4	2232.58	8940.73	12054.7	11523.2	10621.3	10033.2	13214.6	15249.1	15010.3	14207.6	14241.5	14584.4
P17665	9963.92	9182.69	15015.3	9931.38	2378.97	5191.91	4790.56	0	16035.6	8733.34	17375.8	20599.4	7933.78	6672.46	7097.31	3293.48	10180.4	17326	14008.5	23408.9	1961.2	1999.88	2429.16	7805.81	18874.6	19774.8	20390.9	18322.8	4568.71	3011.13
P17710-3	35701.9	33798.3	23917.5	33421.8	64117.1	62352	74137.9	74148.2	38486	38681.3	24145.8	25227.6	30400.5	24159.4	24908.6	44230.3	29807.5	32628.7	23521.8	29561.9	51703.1	49315.6	50455.2	42607	38928.6	47298.9	48094.5	47221.4	57911.3	58951.7
P17742	31303	33970.8	61709.9	30798.3	20244.5	21880.2	31683.7	16067.7	53152.9	35894.6	56035.4	116275	43681.1	50095.8	54672.9	27463	47091	58880.9	70573.4	50943.5	29591.3	25924.5	35076.7	25582.5	24287.5	32942.2	26997.1	39632	16977.4	20141.6
P17751	25268.7	21582.4	33428.3	30067.8	23705	28130	35190.1	22480	30906.6	31697.6	30657.9	38601.3	25942.2	30112.1	29415.5	24004.8	46057.4	29255.7	68453	31317.3	32999.6	38295.8	40054	28433.9	22726.2	27355.1	23781.7	25594.9	42795.3	41163.7
P17809	16419.9	14407.9	9391.07	14100.6	6422.97	5527.49	3947.28	5120.27	15186.6	10823.9	8785.73	8946.69	4691.29	6606.05	5373.42	6226.6	6881.87	7672.65	4317.83	5366.93	11663.3	9541.41	8020.42	11017.4	7288.81	6651.36	6862.26	6452.76	4223.31	4529.14
P17879;Q61696	10278.9	20451.8	23284.6	24342.2	22011.9	22436	28587.8	23705.7	24023.5	20426.2	8936.51	22322.5	14996	13758.9	20772	12085.1	11336.4	7563.2	61086	9014.76	23446.7	24807	23489.8	19655.9	7020.26	6127.25	7542.8	14236.4	14721.9	13884.6
P17897	42981.2	31785.4	27028.4	26897.6	12807.4	13207.8	5028.95	60754.5	65373.2	13606.9	28584.3	48056.4	11358	11665.5	1.17465e+06	6396.03	39694	29066.5	95549.5	85009.8	1384.02	3118.5	2377.04	1207.35	9490.02	67390	10483.6	48957.5	1319.56	2656.54
P18052;P18052-2	0	0	0	0	0	0	1271.67	2424.72	0	0	0	0	0	0	0	0	0	0	0	0	0	0	0	0	0	0	0	0	0	0
P18242	12656.3	8734.58	5272.47	8048.73	1397.01	1363.89	2041.44	1066.13	6765.62	10032.2	11322.4	10592.2	4380.37	3655.19	2627.79	2598.39	4797.62	6286.88	2533.43	26488.3	863.225	1011.16	633.455	1287.7	45414	54586.1	44758.7	50375.5	10981	8714.75
P18608	0	0	0	0	0	0	0	0	0	0	0	2193.05	631.136	0	0	0	0	0	0	0	0	0	0	0	0	0	0	0	0	0
P18653;P18654;Q9WUT3	0	0	0	0	0	0	0	0	0	0	0	0	0	0	0	0	0	0	0	0	874.21	785.382	808.694	830.521	0	0	0	0	825.555	0
P18760	31943.9	9300.43	12230.4	9464.92	19860.2	21981.6	33116.4	16453.7	41817.4	11563.5	24667.3	24951	22357.9	18985.9	22842.6	14854.8	13273.3	12528	8799.33	11552.5	21571.9	21408.3	28115.2	22525.6	9385.96	10414.2	10053.5	8979.16	16865.5	20576.8
P18872	46244.7	42976.7	43258.9	43693	222425	195807	237558	188566	68930.4	63802.3	48953.4	36330.3	115542	77921.4	113120	111867	60272.9	63824.9	34163.4	75023.7	136163	131693	160133	126860	71254	75717.2	69988.2	76427.1	81929.3	84816.5
P19096	9313.7	10373	8460.87	8551.33	6151.07	4368.74	2678.95	6587.69	7764.89	9599.3	6000.14	7937.79	5613.35	5798.85	3823.23	6129.58	4980.75	5773.7	12810	10770.7	5550.92	4936.91	4009.5	4308.49	4430.99	4237.87	4257.94	6000.91	5446.17	5359.73
P19123	0	0	0	0	0	0	0	0	0	0	6007.65	14842.6	7785	13848.6	17132.9	3087.53	10626.6	9969.58	0	0	150.877	165.616	0	0	0	0	0	0	0	0
P19157	0	7552.75	6860.67	2478.19	8052.59	14541.5	15959	8522.63	2187.57	2561.47	7599.62	6187.03	7463.64	9045.48	16091.1	7910.7	4441.59	11457.5	41464.3	7642.15	15041.5	17528.2	16548.5	15417.1	4378.9	4385.5	4720.35	4158.62	10483.5	12709.1
P19246	7658.13	7787.61	7876.75	12769.6	4913.31	9332.85	9957.3	5136.75	10776.5	5870.8	9606.29	10562.6	4953.61	5804.33	3499.63	2563.45	963.2	1369.6	0	3001.01	709.733	1378.68	1250.88	482.432	816.11	1012.36	1020.4	846.213	352.545	221.355
P19253	91393.6	110985	76825	93091.4	14186.2	20798.6	18271.3	11772.9	125469	113052	86729.4	112327	33408.5	65208.9	59537.4	34940.8	119742	107898	83955	172674	12172.9	12783.3	12229.7	19527.7	23870.7	34218.3	30174.4	25660.3	8432.49	6685.98
P19258	0	0	3113.89	0	0	0	0	0	0	0	0	0	0	0	2341.49	0	0	0	0	0	0	0	0	4700.92	0	0	0	0	1396.83	0
P19324	0	0	0	0	3380.64	0	442.658	0	0	0	0	0	3368.47	2425.8	2056.91	2956.52	0	0	0	0	0	690.594	899.683	1126.34	7128.45	8388.09	8249.58	6679.67	945.492	1749.97
P19536	7309.05	7373.45	0	3340.67	3943.07	11274.2	22362.9	3652.01	54277.5	8652.08	6967.62	6649.3	7100.71	5712.71	32722.2	9587.34	0	32091.8	0	0	18468.7	15638.7	21892.9	25584.4	26388.6	38287.3	28723.8	10846.4	18467.4	19519.3
P19783	0	6137.57	29779.3	15856.1	5732.23	8728.41	11699.1	3959.65	17169.1	14766.1	26946	22086.6	11564.1	10131.5	18470.4	6239.4	14202.6	19236.1	9554.21	20912.2	9215.86	7936.12	7671	19660.9	32390.8	27262.4	35101.1	22883.9	15809.1	10827.5
P19973	0	0	0	0	0	0	0	1945.16	0	0	3445.13	15237.4	6555.32	4177.61	4319.38	761.319	4982.94	8336.38	3922.31	11543.1	525.672	677.045	323.131	344.615	0	0	1236.14	0	0	0
P20029	13008.1	6256.84	13274.7	7751.75	1283.4	2652.24	5134.25	2345.15	4913.03	6088.34	8105.93	10999.3	2960.48	2855.12	3638.41	6535.13	11172	5361.7	110171	10020.8	3283.88	651.152	1126.14	2818.66	27524.1	39479.9	31316.3	35208.9	6739.39	6285.07
P20060	9016.1	18752.1	10838.2	19272.3	3037.38	2631.41	3720.08	3168.12	15595.5	23936	13996.9	17683.5	6083.96	5838.66	4574.9	6060.11	14758	16559.1	48184.7	12499.8	994.223	993.665	877.227	713.18	125656	153820	141200	114994	28509.8	25390.8
P20065-2	0	0	5422.78	0	0	1212.94	1670.15	2736.27	7472.56	4109.81	126987	85314.4	38824.8	26638.1	24998	3911.1	7417.12	13654.7	0	10430.7	191.849	428.79	394.924	228.555	0	0	0	0	0	182.878
P20108	7000.68	10032.8	5755.83	6681.36	2263.98	2487.47	2932.71	1283.65	5478.97	4720.33	5122.02	7702.29	3485.36	3285.87	3394.34	2402.26	5268.89	4337.37	10294.8	8377.28	1450.96	1451.95	1627.28	1588.25	9282.09	7938.1	8396.03	7536.07	3659.44	2518.63
P20152	44646.8	8074.41	3997.85	6755.9	1604.94	816.498	1202.34	1604.62	4785.79	4361.41	33084.9	24098.2	6184.78	4669.84	8826.81	2141.27	127289	3832.64	45234.7	13077.1	338.635	454.275	398.506	568.18	1721.49	2245.44	1574.06	3063.61	845.996	461.561
P20357	16387.5	13020.5	7427.59	9033.7	291694	300619	280671	251402	14128.9	18894.1	8233.5	7773.1	54692.1	16989.5	62769.9	82126.8	22571.3	20791.4	23175.9	20299	6118.81	6513.22	7640.45	5220.83	2646.94	3385.02	2444.73	4735.07	3515.72	2396.06
P20444	22529.7	40708.4	0	65797.6	10169.5	8803.4	8680.02	10720.8	32544.5	43535.3	31183.2	10511.2	10865.8	10903.5	9641.11	9476.98	8856.28	9163.99	5465.34	44672.4	22440.2	22911.6	22235.5	20835.5	3235.95	3795.87	6884.61	4650.31	10430.9	13283.9
P20917	21064.1	21531.2	11801.6	19894.9	16526.2	21020.9	38557.8	20219.3	64217.9	25638.5	20879.1	19117.1	24967.9	11256.7	10852.4	15839.1	3900.04	22313.6	38117.1	3098.01	3654.09	3272.76	2741.42	3176.85	15028.5	30208.6	45301.1	7743.36	5022.21	6936.44
P21107	42745.3	9167.92	19776.6	26705.8	12565.4	19150	21777.9	12306	12600.8	13756.3	52867.6	274124	107473	119342	127583	50289.4	103008	153341	214016	91889.8	7799.73	8868.22	12168.5	6374.83	9210.43	10973.8	6440.65	19011	6439.42	7450.52
P21107-2	9539.16	0	14872.5	2691.73	2992.64	4594.51	6824.37	4029.79	1366.32	2311.65	15084.4	87580.6	55960.7	41734.5	39929.3	12105.1	31948.7	51621.4	130403	28337.5	2269.82	2891.45	4033.22	1685.18	2240.93	3229.87	1759.36	5594.83	1259.84	2143.61
P21278	0	0	2510.88	0	18241.4	18056.3	29520.8	15470.1	0	0	0	0	5023.5	705.053	4673.01	5395.69	0	0	0	0	2490.81	2917.49	2464.3	3377.67	0	0	0	0	1757.12	1589.49
P21279	12710.4	0	4297.73	3894.99	52311.6	44636.8	69892	41646.6	1875.28	3369.16	5813.51	0	18108.9	8068.82	12538.4	16087.9	45582	2883.08	73854.1	76405.6	10212.3	12631	10892.8	9457.85	29537.6	52547.9	52644.3	57299.2	5682.88	7414.17
P21460	0	9641.57	7042.37	8808.99	2048.05	1953.8	2429.11	1591.72	7730.87	8493.76	7146.87	9668.14	2685.01	4070.6	3755.12	1823.9	10202.7	7910.53	4590.42	7907.78	527.248	556.441	499.617	445.228	42173.5	51704.7	45737	41779	9383.84	8881.13
P21550	0	0	0	0	0	0	0	0	0	0	0	0	0	0	1695.61	0	3021.21	0	9371.76	0	0	0	69.7879	0	0	0	0	0	0	236.358
P21836	0	0	0	0	0	0	2445.77	1489.36	0	3339.7	0	0	1179.32	2402.68	0	0	0	0	7603.74	0	1916.58	1905.35	1755.99	1674.98	5002.82	2885.77	3296.81	3053.03	1660.94	1246.55
P21956;P21956-2	0	0	0	0	0	0	422.607	0	0	0	0	0	0	0	0	0	0	0	0	0	0	158.023	0	0	2795.34	4461.07	4131.31	3404.32	627.814	843.463
P21995	0	0	0	0	5662.05	6345.48	6290.49	5063.12	0	0	0	0	0	0	10495.8	7377.52	0	7518.13	69295.9	0	1165.2	2690.11	4630.35	1722.51	0	0	2283.15	16686.2	1452.45	1520.84
P22315	7239.23	1143.71	791.59	1405.05	680.263	487.727	621.758	490.68	0	2523.58	0	0	0	0	0	622.099	851.877	2607.59	0	0	487.623	415.035	435.543	294.253	3634.49	4628.66	4721.06	3161.18	1227.48	961.36
P22437	64171.5	101239	62814.5	102398	13624.3	12470.7	8539.5	13234.8	80130.5	111775	65656	73066.4	36043.3	27893.4	16042	36111.3	71227.2	75885.6	47594.1	65372.5	5935.03	4333.72	3658.15	3673.4	499172	626889	523723	553519	102165	104515
P22682	0	0	0	0	1987.49	1339.69	1413.11	1347.75	0	0	0	0	2194.92	1944.58	2672.42	1240.34	0	0	0	0	1999.52	1857.36	2273.73	1698.7	0	0	0	0	792.258	999.288
P22723;P22723-2	0	0	5350.33	5073.72	2448.51	2532.94	6534.04	4469.56	6126.77	5015.51	4166.15	0	2090.86	2295.61	5092.82	4313.71	0	0	0	0	2457.13	2123.02	2352.38	2059.67	5820.86	11208.6	9853.2	9844.02	3091.72	3472.93
P22892	4054.73	4406.17	2929.84	3837.1	4524.65	3507.41	3597.65	4676.02	0	3750.25	2964.72	0	2543.16	2178.73	2083.08	2769.57	2611	2394.08	4914.88	0	4191.08	4410.18	3763.59	3815.28	1691.35	1914.36	2060.28	2653.68	4004.47	4546.26
P23242	8758.25	8451.43	7075.97	8983.73	2076.25	1969.8	1740.5	1408.95	10405.4	11966.2	6684.16	4836.61	2485.63	2803.39	3860.81	2249.45	2916.3	1313.36	4461.3	0	853.003	838.531	647.605	731.066	8481.03	10403.6	9598.34	7589.41	2588.01	2899.3
P23492	53246.2	18860.1	19636.9	15704.1	0	2231.43	4296.42	3127.22	0	0	6690.75	10836.7	781.938	0	6217.08	2368.5	21673.8	5912.04	112827	22555.3	603.906	1000.24	2340.85	963.334	4431.98	4949.24	1801.92	5648.76	1301.63	2064.57
P23506;P23506-2	0	0	0	2830.34	3338.16	5025.44	5938.21	2446.27	0	2148.74	0	0	4286.93	3355.96	4432.3	2938.7	0	1832.16	835.559	0	9186.67	10794.1	12842.2	7823.66	3530.9	3193.43	2342.42	2214.98	3952.35	4622.55
P23780;Q8VC60	0	0	0	0	0	0	0	0	0	0	0	0	0	0	0	0	0	0	19156	0	0	0	0	0	0	0	0	0	0	0
P23818	0	0	0	0	1416.34	1913.29	2530.12	965.48	0	2682.39	0	0	0	0	0	1081.74	3145.78	1979.81	0	0	1763.76	1552.55	1464.22	1689.85	6123.75	6855.08	7304.89	7281.63	2192.78	2554.36
P23819;P23819-4	1213.73	0	2231.87	0	6816.33	6253.05	6999.15	6064.2	0	0	0	1669.07	1536.34	0	1269.81	2916.01	3216.47	2615.67	0	0	3936.85	3903.48	3532.55	3329.66	9868.25	11217.8	8992.93	12175.6	3796.81	3955.27
P23927	0	0	0	0	0	0	1306	0	0	0	0	5184.17	818.726	2447.36	1816.64	0	0	0	9378.96	0	0	0	766.119	0	0	0	0	0	0	0
P24270	127068	19774.4	31833.1	24156.6	6042.95	6451.93	9967.78	7236.62	20261.9	11132.8	23083.5	32077	4523.56	7672.5	12115.6	9233.05	29703.3	20234.9	132723	70312	775.137	1549.17	2944.04	2475.21	19085	18045.4	11302.2	26950.7	3149.32	7058.8
P24288	6451.57	7922.19	3287.72	6313.03	7833.53	8672.9	7656.49	6892.29	5427.32	7182.89	4199.01	7097.1	5874.18	7025.58	6901.79	5693.23	2492.46	2399.72	0	0	9337.13	12823.9	13898.6	8422.53	3887.66	4316.01	4296.74	3539.89	8091.31	8043.08
P24369	0	3450.75	3024.45	6050.74	1388.38	1007.9	1083.08	860.883	4919.08	3398.49	5189.18	5310.72	1834.14	2833.13	1620.97	1648.42	0	2400.36	7237.54	0	426.07	535.738	410.018	369.037	8094.12	10635.5	9344.96	7995.04	1661.13	1678.25
P24452	0	0	1240.46	0	0	0	0	0	0	0	7068.04	3311.11	0	0	997.89	0	0	0	1711.48	0	0	0	0	1	0	0	0	886.499	0	0
P24472	0	0	3566.26	0	1497.22	1750.43	2505.97	967.557	0	0	2709.72	0	2509.4	2439.8	2862.73	1344.69	0	0	0	0	2374.08	3229.29	2858.2	2879.86	0	0	1109.96	0	2004.31	2688.79
P24527	0	1570.21	2980.06	1951.9	2066.3	2588.43	2527.28	2205.01	0	807.839	0	1815.97	2046.46	1623.62	3246.42	2037.17	0	0	4976.22	0	3958.93	4335.37	3623.67	2966.42	0	1312.81	0	0	2263.76	2750.46
P24529	0	0	0	0	26923.4	19790.4	23603.3	26523.4	0	0	0	0	34822.1	25117.4	15994.5	30772	0	1738.13	0	0	95754.1	86963.1	89620.5	90555.6	1777.9	1750.51	2725.02	3596.76	52389.9	59744.1
P24547	9729.46	0	7682.82	4008.9	5894.88	5834.24	6205.75	5860.49	0	1428.18	3407.9	6394.8	2409.64	2195.83	2887.73	3326.93	4789.68	3890.3	40533.5	0	3288.55	4034.39	4495.13	3024	3487.92	3323.35	1758.87	7624.6	1525.09	2060.7
P24549	11274	5530.87	3881.52	13846.2	8793.94	6650.88	7194.05	11215.5	2240.68	3779.99	6749.39	3929.06	13286.4	16510.7	11450.1	8457.51	6660.81	7365.58	4187.56	16706.5	62541	78447.4	87294	74205.1	3713.46	3060.74	3087.67	3419.97	38546.3	59551.4
P24668	0	0	0	0	5347.13	4692.93	10150.3	5323.34	0	0	0	3995.21	4031.35	0	2836.68	2577.84	0	0	0	0	2220.05	1420.28	1831.51	2403.94	1993.35	1887.49	0	2415.99	1717.04	1866.85
P25444	28421.3	21510.6	41010.1	44346.7	20475.5	14899	22492.2	12578.6	28716	13924.1	36964.2	31798.7	19162.8	11355.3	21172.9	9944.12	7872.26	24056.2	21583.4	42492.8	3282.32	6659.26	5054.16	3691.82	9956.98	15673.8	2083.6	12745.6	2998.28	1958.22
P26039	3110.1	0	5537.83	0	394.269	398.552	333.988	815.082	0	0	0	0	752.002	0	2089.38	629.033	0	1911.3	17346.5	0	537.352	493.406	818.975	557.16	0	0	0	1022.68	552.256	616.123
P26040	0	0	13021.5	0	0	604.152	1090.26	2267.71	0	0	0	4975.71	1002.73	0	8506.26	0	0	0	32385.2	0	0	0	0	0	3524.57	5084.32	0	9960.69	1166.85	0
P26041	5856.82	3080.19	29296.4	1918.73	2231.13	2728.21	3950.76	4678.24	0	2507.48	5056.84	12150.8	3435.15	2478.22	22291.7	1479.37	3395.64	6021	90194.5	4716.56	1346.26	1442.74	1465.77	1041.07	2600.67	4355.27	2973.51	11718.2	1518.6	1178.92
P26049	0	0	0	0	1563.15	1096.12	1577.58	1000.32	0	0	0	0	0	0	0	723.132	0	0	0	0	140.508	123.549	161.729	121.808	0	0	0	0	0	85.3622
P26350	19058.3	13781	12954.3	11541.7	7168.6	2763.68	3566.36	1771.59	19423.9	11708.6	171503	157529	49582.6	40410.3	35446	5412.9	8228.8	16011.5	12209.8	23396.6	723.497	1433.19	1190.79	643.829	4034.35	8968.51	5008.95	6006.23	1357.11	1046.1
P26443	16200.1	22645.5	12443.5	21706.8	6460.62	9084.63	9491.14	6688.28	17572.6	25976.9	15529.3	17542.8	8488.46	9723.45	7686.28	11656.6	11797.5	12676.6	12523.7	10583.6	6075.01	4994.91	5545.35	4588.05	16861.2	25617.3	24758.4	20216.6	8656.27	9457.05
P26638	7047.7	3718.71	3777.39	4494.82	7785.97	7548.2	9614.23	7329.46	4351.96	5150.37	3266.97	5571.86	5191.15	4188.1	4753.81	4587.75	4067.5	2921.19	5760.74	0	4836.77	4378.63	5105.91	3797.32	1838.25	1352.03	1681.47	1753.23	2703.17	2926.25
P26645	3216.6	5894.65	3724.86	4792.92	5549.85	7138.96	9462.8	4565.64	6332.64	4961.8	4411.45	15746.3	12098.6	10424.4	13639.3	6648.24	4772.39	7406.17	2620.32	5466.38	3641.93	5262.85	6735.31	2105.7	5443.31	6517.91	5664.56	4556.1	3272.94	4530.69
P26883	0	0	0	0	1533.27	1523.46	1872.21	1196.91	0	0	0	3033.12	3600.42	4488.73	4341.2	2262.9	0	0	9162.57	0	4797.12	6795.78	8725.44	4743.56	1608.29	2696.77	1685.55	1886.52	1823.09	2011.17
P27048;P63163	0	0	5047.03	0	1973.22	1287.98	4330.53	1646.99	0	0	0	0	675.105	0	2504.83	651.493	0	0	22889.2	0	375.967	444.074	549.198	538.568	0	0	0	3646.3	203.489	0
P27545	0	0	0	0	0	0	1267.54	1426.92	0	0	0	0	0	0	0	0	0	0	0	0	748.293	723.124	829.185	2742.82	2976.75	0	0	0	368.027	0
P27546;P27546-2	0	5781.89	3106.26	5195.31	13009.2	13077.2	11252.4	11496	4457.3	5318.92	6242.94	7281.67	14169.1	13939	13649.5	10424	3724.06	4564.9	0	5142.41	4774.26	3911.58	4249.54	2981.98	8481.3	8147.4	7548.19	8889.65	2250.33	2643.5
P27546-4	0	2711.78	438.539	2025.62	7312.39	8317.55	8793.93	6407.8	1059.62	2428.17	2648.2	2399.37	9282.96	7639.88	7357.27	5806.58	0	1347.41	0	0	2478.43	2054.15	2355.78	1703.14	2380.87	2812.23	2341.75	2528.69	883.07	968.526
P27601	1783.27	0	0	0	1717.6	1225.05	2177.94	1760.57	0	1500.02	0	0	1409.53	0	1229.6	1205.89	0	0	3656.49	0	823.887	602.591	688.238	516.718	2054.85	0	1355.26	0	647.161	1149.37
P27612	0	0	0	0	1640.37	1837.27	1744.74	1746.32	0	0	0	0	1275.51	1526.63	0	1168.68	0	0	0	0	2669.42	2657.03	2431.65	2585.46	0	0	0	0	1369.97	1686.84
P27659	70251.4	79114	57431.9	75533.7	19144.1	12038.5	12907.9	12090.5	70805.5	92676.7	43531.3	52894.7	20121.3	31584.2	21593	19963.4	45120.7	39933	40443.6	53687.8	4435.87	5582.34	4664.91	4309.73	14238.3	19100	16935.9	18346.2	3787.95	3015.73
P27773	25308.1	46718.3	26367.4	47196.2	6830.74	7887.8	7591.08	8667.18	34836.2	47153.3	31716.3	48333.6	14566.8	14318.8	9289.98	14719.2	28759	33191	20770	28412.6	4275.12	3514.88	3437.24	2805.19	338222	404628	329608	391434	76036.8	70289.9
P28028	0	0	0	0	2807.79	3249.32	3503.54	3260.02	0	0	0	0	2524.94	2013.72	1953.77	2097.18	0	1468.83	0	0	5410.45	5867.29	6009.81	5215.06	0	660.035	0	955.014	2218.57	2883.62
P28184	5487.33	7894.71	5784.48	12612.6	2978.87	1199.01	5327.29	1949.46	5030.84	6443.53	5250.43	14971.9	7317.27	8087.07	5282.87	6356.85	5761.71	6885.43	5369.91	0	4954.21	5108.27	7700.13	4774.48	6325.94	6329.3	11053.8	7819.43	5686.42	4170.37
P28474	0	0	4543.28	5025.92	2944.85	3657.24	2130.88	1493.2	0	6284.48	5623.44	0	4012.37	4035.68	2793.58	2583.95	2862.36	4651.62	0	0	3757.6	3794.3	4192.31	3509.57	2820.29	3262.07	2761.7	3467.23	2308.49	2611.54
P28481;P28481-1;P28481-2;P28481-4;P28481-5;P28481-6;P28481-7	0	0	56258.9	0	5667.59	0	0	0	0	0	0	217463	121466	107308	118441	31386.9	0	194067	67972.9	0	1613.8	2528.85	5074.88	10486.6	262423	0	0	0	0	0
P28571;P28571-1;P28571-2	9892.15	6663.97	6096.72	4991.05	4593.98	4175.9	3126.19	4837.62	5350.35	7304.02	5522.99	3742.57	2145.47	2672.32	2435.41	3771.13	0	0	0	0	4147.15	3367.28	2266.93	3462.76	3092.77	2451.38	3727.74	2752.39	2319.32	2886.12
P28652	5964.62	7957.1	2164.77	5694.39	9432.51	10551.2	7686.84	9433.72	7539.52	10552.1	5376.17	6054.51	5722.61	5417.89	5056.12	7052.29	7059.38	11159.2	8385.55	9366.59	10119.5	11221.4	10301.2	8812.18	7399.42	8451.21	8007.65	9359	7940.75	7611.73
P28656	0	0	0	0	5842.08	6513.67	9398.76	5228.39	0	0	0	0	4016.23	4070.07	5274.69	3287.84	0	0	0	0	4299.15	4044.98	5112.09	2883.91	0	0	0	0	1359.06	1977.89
P28658	0	0	0	0	3333.48	2533.03	3465.64	2969.07	0	0	0	0	1868.64	0	1715.6	1315.55	0	692.16	0	0	343.835	390.065	402.66	531.71	0	0	0	0	0	239.266
P28660	11693.6	6226	6442.62	4478.92	4791.48	4291.28	2621.07	5019.36	5645.1	6673.61	5184.24	3556.4	3790.46	3479.53	3490.6	4265.49	13532.2	6921.4	13510	9181.76	7959.26	7492.28	6586.54	6890.29	4970.11	5354.8	4882.86	6326.32	5759.69	6337.57
P28661;P28661-2;P28661-3;P28661-4;P28661-5	325440	0	177254	206322	81716.8	12557.7	21875.4	14549.8	569057	222130	278772	29500.1	45490.3	182134	152215	20456.9	216472	0	0	530134	6753.16	7666.29	6373.5	4944.81	65213	92558.1	123654	48978.2	8059.55	5254.8
P28663	0	3639.33	3079.26	5296.18	4309.4	4126.57	4133.48	3290.02	8217.45	4775.49	5747.6	5209.66	3285.4	3204.87	3100.78	3237.7	3617.36	3548.34	0	2778.04	7286.74	8211.7	7933.51	6662.24	4647.83	2843.88	3660.46	2474.52	2807.95	2969.03
P28738	35836	24825.7	0	0	3282.48	4554.51	2932.97	4453.9	90715.6	109664	23493.2	0	5607.88	5171.77	7676.65	4402.23	27666.6	89571.3	0	50466.3	10863	10312	9977.37	9259.43	69686	969.183	3369.41	50364.6	4974.3	6554.17
P28740-2	0	2396.79	1712.97	2686.13	10617.3	14316.3	16927.8	12482.4	18340.8	7229.74	2306.81	7499.76	8770.42	9054.98	8594.48	7931.08	14457.3	3500.23	2061.38	0	14774.6	14419.8	14379.9	11973.3	2186.96	3581.69	3769.19	2881.32	8255.43	9412.4
P28798	0	0	0	0	0	0	400.304	0	0	0	0	0	1497.24	0	0	1174.05	0	0	0	0	0	0	0	0	21629.4	30341.4	24957.1	23434.9	5174.17	4468.11
P29341	0	0	9595.56	0	20339.9	18021.9	39198.6	20285	0	0	9418.91	8699.67	11415.8	11539.1	14444.8	9465.47	0	4327.38	13330.7	0	18776	22574.3	22226.6	17623.8	4882.7	2766.42	4085.03	3870.51	7977.14	9084.56
P29416	0	0	0	0	0	0	0	648.323	0	0	0	0	0	0	0	979.212	0	0	32396.3	0	0	0	0	0	1240.05	2015.17	1680.02	1565.7	298.621	329.027
P30275	42526.9	38683.7	49542.6	47058.1	64521.5	80829.2	119520	73678.4	41726.1	41608.3	29276.2	39472	32006.4	25887.8	26849.6	32079	30854.1	32736.4	131656	29877.6	16473.6	15827.2	19384.6	12786.4	46845.2	61642.4	63775	60347.9	33533.7	28384.6
P30416	1.0704e+06	1.04678e+06	233665	717822	85729	92389.5	69142.6	55937.9	1.50611e+06	1.07238e+06	656962	885898	111990	181973	192998	85011	701332	602296	587714	1.49161e+06	21942.9	36466.6	29826.4	2534.07	252901	420274	287245	212650	27585.8	20746.1
P30548	0	0	0	0	0	0	0	0	0	0	0	0	0	0	0	0	0	0	0	0	518.893	404.502	246.3	290.748	0	0	0	0	0	0
P30681	0	0	0	0	0	0	0	0	0	0	6816.36	63305.8	24145.1	18904.1	14102.3	3668.74	8070.2	26155.7	4162.84	14177.6	334.509	469.326	882.756	0	0	0	0	0	226.417	0
P30999;P30999-2;P30999-3	1.73783e+06	2.65023e+06	374396	2.12674e+06	121234	95935.6	43303.1	92184	2.15058e+06	3.20244e+06	1.66793e+06	1.56866e+06	173301	345099	197952	219340	2.23727e+06	1.86929e+06	480473	1.5686e+06	48584.2	35907.2	21097.6	32426.4	735745	1.67996e+06	802769	1.77862e+06	132824	97649.6
P31324	0	0	0	0	4090.47	5942.62	6777.37	5047.13	0	1280.86	0	0	1793.42	1658.05	1024.55	2746.83	4285.14	3265.5	0	4598.54	7025.23	7136.57	8010.37	5921.38	2030.14	2355.62	2320.06	2690.87	5106.13	6105.95
P31648	9600.9	11314.7	5950.97	9045.5	7261.14	5821.71	4629.52	6649.32	9696.32	12909.5	5887.77	4411.87	6769.1	6195.71	4462.92	9490.36	4936.62	4789.91	11712.8	1043.58	27673.7	19673.5	21718.2	22397.7	13348.5	12864.4	13444.7	15531.1	16040.9	16713.1
P31650	128267	157094	107883	172691	91598	87574.5	63721.6	64858.7	153103	130431	99715.4	83651.8	64587	65480.3	50819.8	66505.8	18882.8	18955.9	9494.21	20804	45694.4	36559.7	26369.3	28534.7	109831	114483	127297	93644.1	50040.8	58784.2
P31725	0	0	0	0	0	0	0	0	0	0	0	12070	2875.97	1849.1	0	0	0	1350.49	0	0	0	0	0	0	0	0	0	0	0	0
P31750	0	0	0	0	0	0	0	0	0	0	0	0	0	0	0	0	0	0	0	0	1087.36	1024.24	1338.8	1076.52	0	0	0	0	420.19	706.772
P31786	0	0	0	0	0	1110.59	0	0	0	0	20239.5	35825.8	19254.3	13986.1	22317.2	11475.8	26171.7	17317.9	0	36338.6	162.996	0	25236.8	30363.6	0	0	8452.45	15743.2	16628.4	19856
P31938	3772.86	9324.65	3889.1	7712.02	11322.5	10401.6	9818.9	9814.28	9488.53	8177.43	4853.62	5926	13150.8	12534.7	10827.6	11162.6	13628	7842.99	5616.01	10800.8	25233.7	26041.8	26034	20614.2	3685.66	5433.69	5332.67	4939.05	15926	17121.7
P32037	6786.3	5284.51	7258.98	5951.84	3507.24	3322.83	2513.35	3089.22	9548.13	11154.6	9436.83	11309.3	7216.8	5727.51	13936	5949.28	9406.13	12365.3	12780.4	17329	14328.4	11610.7	10000	16171.7	20573.9	14486.8	17244.5	13707.7	10733.6	8114.98
P32211	0	0	0	0	0	0	0	0	0	0	0	0	0	0	0	0	0	0	0	0	788.723	446.892	371.673	756.103	0	0	0	0	275.979	374.933
P32921;P32921-2	0	0	0	0	1712.6	2538.13	2848.54	2412.59	0	0	0	0	2135.79	2179.46	1836.38	2064.68	0	0	0	0	2459.97	2566.72	2733.94	1865.46	0	0	0	0	2359.1	2683
P33173	0	0	0	0	7456.94	5852.31	4843.76	7770.69	0	0	0	0	5390.98	4715.43	4059.86	6030.79	0	0	0	0	4177.13	3727.36	3373.88	3271.37	0	0	350.904	922.008	2618.21	2293.19
P33175	0	0	0	0	2601.26	2116.59	1766.37	2365.73	0	0	0	0	3277.82	2706.41	2464.11	3365.74	0	4789.19	0	0	3011.03	3111.48	2366.5	2580.52	4562.24	0	0	0	1887.16	2168.25
P34022	0	0	0	0	2286.05	1828.15	2676.67	1736.18	0	0	0	5245.62	3127.8	2060.54	3292.56	1481.08	0	0	0	0	3136.98	3307.72	4438.73	2167.9	0	744.144	0	585.744	2825.76	3221.18
P34152;P34152-2;P34152-4	10040	0	0	0	1482.65	2443.77	2616.72	2033.12	0	0	0	0	1756.29	2411.97	2550.45	1745.63	5549.09	5336.12	0	0	2946.73	3695.6	3634.16	2685.77	4458.1	0	4595.56	0	1737.58	1673.15
P34884	19410.9	25139.6	17028.4	27392.2	12996	16393	19185.6	9460.5	34794.4	30608.5	23918	41296	22944.7	29247.7	22514.7	16414.7	48096.9	33644.1	27001.4	41714.4	43644	63557.4	70063.8	40913.1	16550	22375.2	19278.5	15877.1	24627.4	29948.6
P35123	0	0	0	0	0	901.442	0	0	0	0	0	0	0	0	0	0	0	0	0	0	1454.88	1311.44	1155.12	1237.07	0	0	0	0	395.103	660.779
P35235	0	0	1353.17	2017.45	5060.4	6104.47	4701.66	5404.27	2227	0	5602.21	2498.5	5165.47	4957.88	4033.19	4332.36	0	2202.88	0	0	8531.44	7753.72	7892.94	7221.78	1760.99	2379.31	1609.45	2170.09	4232.35	4505.83
P35242	0	0	0	0	0	0	0	0	0	0	3435.1	25393.4	7581.46	12220.9	6927.09	1597.45	0	5126	0	0	801.15	145.537	0	0	0	0	0	0	583.194	0
P35276	25473.9	28437.8	18049.8	31061.1	19480.9	23822.9	23411	18957	31885	31636	19016.5	22682.6	27735.3	27704.3	23805.7	22328.7	26835.1	22943.4	22741.7	36741.7	73664.3	84799.8	93217.2	69347.9	31037.3	33483.5	35558.9	26452.7	72148	78500.2
P35278	0	0	2998.77	0	5898.46	7854.54	10144.2	5811.15	0	0	0	0	2817.75	986.4	4377.24	4001.86	0	0	15920.2	0	4916.73	5847.24	6513.12	5539.1	1767.2	1214.32	1904.85	2948.38	2843.6	4150.69
P35279	0	0	15841.8	0	19896.8	27263.1	33705.2	15331.3	0	0	11290.4	0	29220	27188.8	28336.7	16544.5	0	3059.31	16580.7	0	41574.7	51558.1	62432.4	37398.1	3389.83	2952.35	5686.15	3965.01	18288.5	20478.7
P35282	0	0	2414.99	0	2290.69	1873.53	2297.69	1759.88	0	0	0	0	943.769	1353.01	2254.35	1125.5	0	0	9870.8	0	2646.64	2616.72	2683.07	1811.84	1687.05	1685.97	1083.36	2179.65	2164.31	2633.27
P35283	0	0	2567.11	3528.86	2114.07	1283.84	1477.57	1759.48	0	0	3105.43	1653.68	1808.52	1879.04	2240.68	1675.64	0	2013.86	2428.83	0	976.662	1257.32	1215.33	1287.68	2320.15	2306.94	2579.03	2823.21	1170.89	1180.31
P35290	0	0	0	0	2321.42	2455.64	2900.54	2005.3	0	0	0	0	1442.55	0	0	1635.48	0	0	0	0	1217.29	2340.73	2383.6	1432.41	0	0	0	0	1468.36	1430.2
P35293	0	0	0	0	2609.3	3229.04	4935.73	2403.22	0	0	0	0	1028.53	0	1159.64	1614.18	0	0	0	0	856.287	1030.57	1358.42	1160.6	869.286	890.53	0	0	1153.95	1301
P35438;P35438-2	0	0	0	0	2099.09	915.486	1851.13	1369	0	0	0	0	0	0	0	1223.82	0	0	0	0	1487.41	1588.98	1355.64	1239.69	3852.14	3643.22	3946.74	4300.18	1475.19	1446.89
P35486	22004.3	27111.1	16720.8	28587.7	8337	12578.3	11542.8	7739.09	26181.2	31631.7	22254.6	27379.7	11407.8	15723.7	11032.2	14251	27529	29555.9	14349.8	23919.3	11991.9	11541.5	13039.1	9900.65	36537.8	50237.5	44795.9	39485.9	21390.1	18526.9
P35492	73554.8	13921.5	13343	9950.21	2741.31	4199.6	4821.42	2834.44	9626.57	0	5685.3	8874.7	1055.32	2578.49	3716.87	3343.71	12948	8564.9	64951.1	28748.5	2472.08	1242.26	1453.29	1201.2	5192.8	5645.48	2992.43	28459.8	789.513	1805.46
P35546	0	0	5428.85	0	3890.22	2254.4	1988.6	3662.58	0	6416.43	0	0	4418.22	4202.63	2701.36	4406.54	6061.58	7294.99	0	0	18988.6	14362	14282.7	12573.8	16380.4	4268.97	16547.3	15574.4	5309.78	8531.39
P35564	15202.9	16821.6	14849.5	23873.4	16378.8	14659.4	27197.5	14838.9	19583	18322.8	18677.8	20898.4	12111.1	8535.25	7960.32	11289.6	10989.8	10664.8	19276.5	16582.8	4015.08	4247.99	4384.86	3040.27	86882.1	117269	99474.6	92177.3	18657.2	22823.1
P35585	0	0	0	0	726.185	1012.39	1404.4	1180.16	0	0	0	0	636.111	942.269	0	650.956	0	0	0	0	1573.09	1543.32	1619.15	1519.57	0	0	0	0	1154.64	1501.5
P35700	48163.8	18769.8	30568.2	13001.3	17636.3	29375.5	29182.9	19211.3	16157.5	8541.32	18032.3	28336.2	22201.3	23125.6	20504.9	15534.4	30700.9	13634.9	99738.2	34939.2	30703.9	33113	39526.6	30068.2	12035.4	12946.7	9619.57	26992.6	19231.7	20982.2
P35762	6918.08	4153.43	82615.6	4466.19	6415.23	4423.52	10091.2	3507.54	16924.2	8701.84	126333	5655.66	12376.9	11015.8	31736.2	7191.54	9762.33	52574.4	10106	0	9620.4	13293.1	15307	76204.1	39437.7	8436.78	38016	4524.14	20077.7	4329.89
P35802	8843.12	12346.8	66152.6	7334.28	11142.8	12343.5	12498.2	8226.72	15874	16863.1	72721.8	8330.79	25315.9	20783.6	48324.3	20614.8	15453.3	36545.5	7629.64	13796.8	59179.3	58883.3	64785	93448.1	64643.6	25625.5	52821.1	17302.7	29555.6	25864.8
P35803;P35803-8	27506.9	27320.8	131352	22416.5	6464.03	5595.28	4983.06	4310.57	48958.9	19698.9	179009	14264.9	10752.9	7080.63	29027.7	8046.15	24545.4	94026.9	15676.4	18793.8	19780.1	15218.9	15771.7	86900.8	61231.7	23376.3	40824.3	19675	17425.4	7202.37
P35803-2;P35803-4	0	0	0	0	0	0	0	0	0	0	0	0	0	0	0	0	0	0	0	0	16.2316	0	0	0	0	0	0	0	0	0
P35922;P35922-2;P35922-3;P35922-7;P35922-8;P35922-9	0	0	0	0	951.13	544.249	1018.61	572.957	0	0	0	0	0	0	0	141.368	0	0	0	0	52.7923	0	0	0	0	0	0	0	0	0
P35979	2818.22	0	37464	0	5203.05	3905.38	12298	4271.47	0	2306.44	8698.79	7306.78	3309.76	4025.57	6747.45	2162.84	22678.8	4590.43	20527.1	0	983.28	2931.56	2097.73	1886.95	634.552	1172.77	0	7912.71	1114.4	1303.3
P35980	78233.5	87686.5	61457.5	75905.6	10750.5	18013.8	10784.8	11844.8	73585.3	139929	62057.1	84168.8	28065.2	105468	159059	59618	156100	207924	53168.8	137564	27079.5	19613.4	28784.4	27329.7	30163.7	49621.6	31126.6	31722.4	13895	16387
P36536	0	0	9886.72	0	11690.2	9959.83	15635.6	7416.71	0	0	15642.3	0	5235.47	6533.42	8280.23	4761.63	0	6268.81	7902.43	0	4037.87	5462.19	6416.1	9362.75	4857.9	2935.67	7514.14	4405.06	3248.17	2983.94
P36916	0	2613.88	2655.84	3095.84	7123.87	7990.26	7529.26	7961.7	0	2259.58	1652.96	1845.86	4342.96	4473.76	4544.81	4797.73	0	2123	2426.04	0	7715.38	8212.67	9665.06	6486.63	1346.1	1841.94	1149.5	1024.62	3428.94	3843.71
P37040	0	0	0	0	5545.29	6806.37	7750.73	6870.02	0	0	0	0	1924.6	2165.88	0	3502.09	1947.15	0	0	0	2816.78	2603.95	2729.95	2410.56	0	2368.8	0	0	1741.8	1542.33
P38647	17202.7	17908.6	20215.4	18392.9	28176.9	10202.1	36353.8	26972	18975.8	17236.7	19911	25352.5	22976.5	20399.2	18155	16461.1	25079.2	15400.8	38234.1	10349.5	24681.8	34471.1	25352.1	23862.8	11356.7	14877.3	14201.1	30509.4	17905.9	3776.95
P39053;P39053-4;P39053-5	28545.2	41253.1	15006.8	20725.3	36380.1	45786.5	42459.7	46966.7	34674.3	28763.3	16070.7	21024.8	30811	30945	19740.9	31573.5	23753.1	20735.9	17754.6	19454.5	82774	79192.6	78161.8	70179.2	16886.9	18668.7	20740.5	18769.3	57861.9	59521.6
P39053-3	0	0	0	0	4785.33	4268.3	4664.17	5907.2	0	5411.52	0	7819.09	6982.06	6629.17	1553.18	8238.09	9222.99	4942.62	6124.84	0	15728.4	13331.2	12403.5	14952	5537.95	6156.44	5431.57	8274.03	13207.5	18741.9
P39054;P39054-2	0	0	0	0	0	216.836	158.536	335.684	0	0	0	0	0	0	0	313.989	0	0	3319.73	0	610.026	443.384	393.46	459.362	0	0	0	0	561.174	553.261
P39688	0	0	0	5194.53	2415.56	2491.83	2126.94	2629.19	0	0	3201.89	3377.94	2909.18	2792.9	3033.28	2743.52	0	3752.24	9376.2	0	6900.65	7385.63	7434.77	5477.68	4081.14	2645.36	2157.1	3737.43	3005.91	3442.81
P40124	13384.7	21145.7	15181.8	33096.6	11215.2	8996.06	10777.4	7553.17	28375.4	16733.1	4600.43	51077.6	15963.7	16489.1	14701.5	13536.3	4216.61	18651.1	20618.4	8402.54	9153.17	10302.3	10590.5	7184.3	11256	4940.3	13486.5	5849.74	5934.43	5685.72
P40142	21627.8	13848.8	21758.2	16380.7	13316.4	17196.7	17219.6	15803.6	14218.9	13951.7	14080.3	18866.3	18022.5	16205.5	29354.9	13894.8	17125.4	11998.5	52234.8	17501.2	19572.8	22157.4	19994.9	17114.5	6969.77	8463.9	6828.98	12233.5	13391.4	14297.2
P40237	3988.92	3772.54	3606.16	6420.74	1069.37	2311.04	1408.73	2642.95	0	5272.42	3381.32	0	1676.49	2255.89	1235.9	3842.23	1731.83	1533.69	0	0	5593.22	4311.66	3070.69	4293.2	1691	1539.39	3113.18	3221.91	1223.78	1694.58
P40240	8556.28	0	83644.2	0	2169.34	4607.64	0	0	18441.8	6351.73	116379	0	11133.4	0	29187.5	2932.14	5315.51	41510.3	0	0	3791.68	1764.84	1414.57	72366.4	26472	4913.58	21996.7	3966.32	9737.46	1205.96
P40336;P40336-2	6098.92	0	2747.69	1559.2	2843.04	2677.35	2857.14	2105.48	0	0	0	0	0	0	1513.52	752.735	0	0	11102.3	0	1235.8	1185.87	1565.49	1373.93	0	0	0	1912.19	1391.74	1796.22
P40694	0	3894.58	0	0	2497.25	1972.27	1392.28	2905.02	0	0	0	0	2805.3	4065.21	2860.15	3187.85	0	1386.64	0	0	21342.5	20684.8	21358.1	18093.8	0	713.501	1004.98	874.638	7502.67	7704.77
P41105	43897.9	54916.2	35923.9	51114.1	7967.84	9446.66	9771.2	6606.35	59501.8	67677.8	34675.6	48132.3	17319	33132.3	24926.1	19349.8	50775.3	49686.1	36290.9	62279.3	5202.58	4977.64	4055.78	4358.1	12300.5	21046.1	15705.9	16216.9	4239.41	3547.23
P41216	0	0	1683.13	0	1289.09	1522.54	2081.01	1271.08	0	1620.7	0	0	1109.01	0	2546.4	1114.65	0	1742.09	7637.89	0	727.149	689.147	745.651	925.388	1530.44	1672.9	1924.51	5266.62	935.794	1022.35
P41241	0	0	0	0	1189.75	1466.53	1203.23	1452.87	0	0	0	0	1599.24	0	1801.6	1004.18	0	0	6777.75	0	2267.51	2350.67	2141.84	1649.47	0	0	0	0	995.426	1324.16
P42225	0	0	0	0	11919.3	1135.73	1751.99	1775.61	0	0	0	0	2525.01	0	0	630.012	0	0	0	0	2057.7	2322.91	3416.07	1399	0	0	0	0	459.684	903.536
P42227;P42227-2;P42227-3	0	0	0	0	526.793	501.188	385.628	806.136	0	0	0	0	0	0	495.048	585.77	0	0	0	0	640.65	771.648	735.487	522.661	0	0	0	0	327.489	480.194
P42232	0	0	0	0	2302.96	2118.93	2063.14	2305.85	0	0	0	0	2255.56	1761.61	2319.96	1788.81	5466.55	0	0	0	2947.81	3209.87	3270.02	2103.37	0	0	1967.66	0	1347.74	1296.89
P42567	23216.9	0	10662.6	4956.67	1532.71	1329.53	1414.92	1694.92	0	0	4710.37	0	1639.21	1763.77	1475.57	2071.43	7419.11	0	30225.6	0	2467.61	2055.67	2386.68	1758.07	2670.73	4790.35	2323.01	4138.83	1533.31	1585.87
P42669	14960.1	6057.58	8273.98	7763.07	21798.5	21053.7	43153.3	26231.2	9837.87	5599.13	11520.2	6634.43	9715.58	5184.4	8417.28	13113.6	5955.4	6497.9	27468.3	7173.48	5846.41	5961.02	5839.82	2456.72	5113.65	2083.15	1664.37	3921.62	5577.83	5709.5
P42859;P42859-2	0	0	0	0	1009.26	724.126	452.315	1349.84	0	0	0	0	390.677	0	0	731.745	0	0	0	0	1062.43	912.234	646.056	847.727	1344.75	0	0	0	868.561	880.421
P42867	0	0	4840.58	0	0	0	0	0	0	0	3620.87	0	0	0	0	0	0	3780.95	0	0	0	0	0	5229.56	4852.86	0	1613.48	0	556.441	179.895
P42925	0	0	0	0	0	0	0	0	0	0	0	0	0	0	0	0	0	0	0	0	0	0	0	2658.27	2046.15	0	0	0	846.371	0
P42932	4139.58	5317.18	9204.7	5999.21	21547.8	21667	31125.7	22619.6	5328.49	5394.73	4841.45	4463.19	11709.6	8940.88	13644	10794.5	4199.57	5060.83	11562.2	4844.41	20196.4	24023	25547.3	17583	2388.71	2378.56	3074.36	3620.21	8977.81	11851.5
P43006	30200.8	34726.8	28880.7	30458.8	11220.2	15087.9	8221.38	10466.6	29424.7	36451.3	35254.7	24580.3	16108.9	20819.6	15126.8	20923.5	32715.6	33852.9	20371.1	32913.7	56353.4	47959.4	38032.2	57400	183662	135198	134062	137774	56915.1	52619.9
P43024	0	0	0	0	0	0	0	0	0	0	0	0	0	0	0	0	0	0	0	0	0	0	0	806.214	0	0	0	0	514.336	0
P43274	270500	170469	169625	301107	83459.9	57116.8	38671.9	54345.8	407015	164104	225813	349167	104492	204467	194327	73985.3	62568.6	98266.8	107914	143117	12328.7	25409.2	35115.9	5357.87	90395.1	127049	91736.7	34592.2	12851.3	13272
P43276	8015.23	0	4220.54	7189.97	3442.37	2165.58	1609.68	2435.68	14783.1	5011.06	16292.3	51672.2	13345.5	14283.2	28666.2	2574.4	5731.24	15552.6	5043.18	9253.41	520.941	988.764	1368.67	225.67	3748.71	4977.3	3439.32	2119.23	494.374	518.508
P43277	184244	102711	125077	182304	56906.3	38046.4	29424.9	38918	257072	79799.5	171854	297446	81258.6	125122	168367	37916.7	64889	94682.8	89950.3	144815	11427.9	20695.7	25787.5	5162.04	84733.6	131682	76494.6	40751.8	14285.6	10846.3
P43407	0	0	0	0	0	230.316	596.251	168.862	0	0	0	0	561.727	857.117	706.576	360.058	0	0	0	0	1373.97	1866.41	2062.59	883.544	0	0	0	0	467.462	520.013
P45376	0	2776.12	2901.61	5491.22	5276.48	4880.65	5752.97	4460.04	7529.49	4620.32	3714.19	2482.78	5791.65	5717.6	5295.61	4695.58	7191.46	4000.61	0	0	12511.6	13866.2	12756.1	9856.18	2605.31	2469.08	2615.67	2593.77	7398.9	8741.5
P45878	0	0	0	0	0	0	0	0	0	0	0	0	0	0	0	0	0	0	0	0	0	0	0	0	4951.03	6991.97	5863.51	4920.95	1659.37	1876.4
P46061	158181	526649	0	158162	7951.75	6953.35	7337.68	7149.07	286458	0	4956.11	0	4034.23	2086.7	4250.02	3283.01	0	0	0	0	1288.59	1430.33	2005.37	2895.48	50008.2	0	0	3009.34	12619.7	977.404
P46096	25796.3	12459.1	7912.51	15996.7	12709.3	12235.7	12774.7	9515.3	16181	16552	14029.6	15221.3	23276.5	36647.9	18048.4	23798.6	15289.8	13989.8	17545.2	24291.1	110933	106335	101344	91085.6	20381.6	20830.5	12434.3	20232	58494.3	73078.9
P46414	0	0	0	0	434.939	656.378	751.53	483.1	0	0	0	3351.78	2552.75	1985.45	1963.57	659.143	0	2453.77	0	0	529.771	570.731	628.377	329.297	0	0	0	0	263.371	270.966
P46460	37848.1	43343.1	25461.1	41565.8	43133.2	55243.3	63050.9	53076.7	39814.3	48694.3	28517.9	29647.5	32504.6	29897.1	25777.4	36174.7	33107.3	39369.8	21459.3	30392.2	65985.8	62952.9	58973	49563.5	32143.8	36901.1	37087.5	35009.2	54357.1	55852.3
P46471	0	0	2358.29	0	13192.8	14831.3	22240.6	13442.1	8857.28	0	0	0	5208.78	3560.18	6087.7	5452.3	0	0	4923.78	0	5777.24	7192.4	7964.98	5543.59	0	0	0	0	3526.22	3940.72
P46638	5292.12	0	9597.71	0	30479.6	33928.3	62668.4	22450.7	2865.03	0	8074.03	9715.92	9900.49	5005.27	14272.4	11745.5	7601.89	0	23450.2	0	10179.2	12683.8	17442.9	11195.4	2596.25	1792.35	2549.86	7833.1	5743.92	6640.88
P46660	48517.4	44898.3	39536.6	65374.9	44863.9	158524	183649	59625.4	63302.8	36082	73849.3	93189.7	80092.8	64551.8	47134.9	31199.6	16874.7	17482.9	26269.9	37391.5	11405.2	19383.7	21833	7604.55	7639.67	10001.4	8624.1	12012.5	3927.49	2746.14
P46664	0	0	0	0	2049.18	1836.73	1362.51	1642.72	0	0	0	0	1039.79	500.308	1117.66	881.83	0	0	0	0	4550.92	4414.28	4497.69	3501.99	0	0	0	0	1690.34	2233.8
P46737	0	0	0	0	995.088	739.127	932.997	810.064	0	0	0	0	0	0	0	190.175	0	0	0	0	373.873	407.658	402.421	417.094	0	0	0	0	138.319	5702.53
P46935	0	0	0	0	2092.72	1694.1	2141.12	2029.23	0	0	0	0	1066.91	0	1022.66	1348.08	0	0	0	0	1902.27	2003.4	1839.18	1544.01	0	1129.61	0	0	1126.02	1278.76
P46978	6585.66	3149.68	3773.29	3716.17	957.646	1115.26	1168.39	1424.48	0	3796.77	2672.36	0	880.323	0	2216.98	1976.34	4342.64	2881.22	17418.3	5279.68	2197.86	1966.37	1574.44	2034.32	18315.5	20850.6	18805.5	24872.3	4885.59	4921.47
P47199	4896.13	4410.44	0	0	1149.61	1172.8	1428.8	645.814	0	0	0	0	0	0	382.612	434.548	6333.75	0	6426.98	4611.84	1001.11	1003.73	1183.45	948.375	1191.07	0	0	871.113	778.77	621.639
P47708	2542.77	1945.18	911.693	2794.54	2351.65	3080.59	2334.4	2402.18	2116.47	2220.15	1803.19	3364.49	4986.75	8016.5	4572.94	5361.51	2659.46	2121.67	809.916	0	25587.3	28714.5	23081.3	19351.6	2108.5	2025.34	2290.13	1781.67	8446.35	11196
P47738	27388.3	34743.3	26496.7	36413	4271.68	8159.42	4928.22	7189.44	30513.4	37883.9	25015.7	27561.8	7029.97	10708.8	6998.94	11500.9	27540.9	25081.7	31767.9	22353.9	3866.39	3401.96	3508.42	3122.89	96631.9	114116	115460	95159	26919.4	19743.2
P47746	0	0	4348.29	2271.26	1313.9	1105.56	2100.98	1187.93	0	0	2648.4	0	0	0	0	2628.92	2067.39	1644.89	0	0	1924.09	1637.42	1463.64	2506.82	2245.45	2587.26	2700.04	1151.95	927.724	779.71
P47753	0	0	0	0	5143.78	4835.15	6237.47	3448.32	0	0	0	0	4089.66	9744.55	4756.83	2956.96	28332.8	0	24417.9	0	5622.91	6441.91	7090.19	4500.67	0	0	0	16237.7	3097	3435.31
P47754	0	0	29694.9	0	12724.3	15526.8	19162.8	11011.3	0	0	7137.89	12838.4	10706.5	6872.73	14201.9	7881.99	35707.7	0	52361.7	15843	17983.9	16999.5	21444.7	14176.7	6504.66	4529.42	1240.84	9277.45	7807.65	9415.54
P47757-2	7757.2	12043.1	12492.4	6543.07	11353.8	9795.26	12025.3	12117.7	5572.06	6121.31	5315.98	8275.15	7265.53	6730.2	9421.37	7251.02	16421.1	4950.95	33923.2	7764.35	13136.5	14045.9	15032.5	9722.59	6750.42	6186.35	6001.49	10032.9	9406.09	10767.9
P47791;P47791-2	0	0	0	0	0	2055.97	1578.4	3286.48	0	0	0	4072.3	1973.33	1508.99	10024.6	1749.08	0	3954.87	9396.33	0	2009.41	1819.93	1762.64	1726.71	2660.89	3096.44	3310.89	3364.51	2732.33	1699.86
P47802	0	0	0	0	1281.7	1631.21	2151.21	1160.88	0	0	0	0	0	0	0	587.07	0	0	0	0	683.997	881.802	1000.92	760.621	0	1218.67	1337.73	0	793.327	1020.59
P47809	0	0	0	0	2847.24	3364.83	3548.64	2731.85	0	0	0	0	2978.4	2440.65	2557.38	1867.59	0	0	0	0	4961.93	5262.6	6772.9	4373.29	0	0	0	0	2706.04	3159.71
P47856;P47856-2	0	0	1687.42	0	2041.74	2033.36	1741.86	2311.12	0	0	0	0	513.578	0	641.718	610.436	0	0	0	0	35.7843	0	0	0	0	0	0	0	0	0
P47857	10733.2	10886.1	8335.6	11285.4	15088	14671.7	15366	18550	11515.9	12951.6	8806.24	7142.43	7931.88	7265.25	6979.69	9862.95	5177.9	9409.22	10386.8	0	9651.04	9609.22	9697.48	7592.96	6673.2	7404.46	7508.65	6743.73	10897.6	12976.8
P47911	148251	182753	92518.1	198749	39003	31575.7	33036.3	25600.1	201070	201657	121894	156866	66594.4	76579.3	33187.5	47449.5	130445	75158.4	125865	209141	8851.27	14428.3	6804.74	7971.92	48898.4	70349.7	55316.6	68264	12151.8	8670.26
P47915	24165.4	36824.4	20876.1	34636.8	4946.89	6936.42	5728.33	4074.44	33860.6	36954.9	24275.7	31970.2	11319.9	17747.6	11022.8	18004.1	23899.5	23236.4	22652.7	35143.9	2381.27	3500.21	2389.73	2787.55	7711.01	13209.6	9772.41	9709.71	3261.69	2216.24
P47941	0	0	0	1841.5	3543.64	4929.33	4426.18	3462.32	0	0	0	2998.91	4702.08	5184.85	3965.18	3369.16	0	1121.89	0	0	9639.77	10285	12523.3	8145.91	2412.24	2605.6	1769.27	2638.85	3640.45	4327.66
P47962	0	0	14874.9	0	4355.48	3582.81	7617.44	3084.24	0	0	0	0	0	0	0	1538.69	0	0	0	0	1178.22	1309.98	1540.48	1385.6	0	0	0	2856.89	0	0
P47963	72813	84098.8	55472.8	87086.2	16335.2	14569	13719.5	10000.8	81988.8	99464.1	53285	71788.3	28353.1	38357.6	17881.1	24412	58767.3	37207.7	52833.6	86643.8	3945.44	6501.72	3434.73	4894.07	18386.7	26512.7	22972.2	24144.8	6093.88	4549.79
P47964	21749.6	27377.9	27152.8	39962.3	3897.6	9681.72	7591.18	2943.11	21907.3	67631.8	42162	45772	16973.9	61815.9	30282.7	26263.5	56380.8	62888.5	51318.8	89342.1	8403.93	9300.07	7315.62	8921.1	9475.55	20368.1	13813.8	13797.8	4789.58	3368.85
P47968	0	0	847.208	0	0	0	0	184.988	0	0	0	0	0	738.08	0	887.436	0	0	18102.9	0	0	0	75.768	58.5412	0	0	0	0	0	0
P48036	7613.86	0	12406.9	0	5571	7469.47	9855.85	6973.45	8149.75	6829.9	19459.4	28702.8	11949.5	10219.4	22410.3	5592.96	0	6557.95	27820.8	0	12636.2	17249.3	17348.3	12528.8	2226.49	3735.87	2360.19	5484.52	8065.03	8447.35
P48320	6980.78	7109.48	3311.92	5991.6	2930.51	2979.22	2537.63	3181.04	7298.74	4926.72	2377.92	0	4240.31	2010.58	1433.92	4228.48	3315.62	3159.54	0	3033.51	1713.4	1387.01	1613.55	1668.96	3567.69	4452.7	5327.87	4358.89	2074.72	1817.57
P48453;P48453-2	0	0	0	0	3332.99	2051.98	3822.38	3809.51	2588.46	0	0	3029.39	2555.27	1707.19	3264.37	3139.64	0	2361.87	0	0	4252.67	5094.78	4959.54	3286.68	2834.44	3294.9	3038.5	1314.11	3609.58	4019.38
P48542;P48542-2	0	0	0	0	3562.96	1865.17	2199.79	1921.97	0	0	0	0	686.888	0	406.796	1284.99	0	0	0	0	1065.86	929.109	972.038	946.943	0	0	0	0	609.715	745.876
P48722	7010.55	7321.35	5855.02	5290.38	9463.86	10574.2	8856.95	11610	5887.43	6914.15	3894.17	2778.56	6764.35	6512.56	4332.19	6637.94	5430.36	4424.5	4586.95	6032.12	13229	13928.3	11103.3	10358	2849.4	4085.51	4142.43	3697.15	9578.59	11414.1
P48758	5572.53	4455.18	5211.58	4984.84	3738.85	4793.03	4360.75	3392.19	5143.31	5814.23	4252.48	7282.61	4415.07	4259.66	4987.22	3035.92	2016.85	5927.29	26985	9303.03	4395.77	5528.06	5506.53	4298.74	4057.55	4261.97	3691.76	5803.81	3451.02	4212.9
P48771	0	0	7873.04	0	763.028	1942.81	2506.96	619.514	0	0	12077.2	7611.05	2716.61	0	4660.87	832.813	0	6898.1	0	0	1469.66	1020.95	1328.61	10831.5	8935.15	3085.28	5243.31	2068.65	2897.07	1174.44
P48774	4706.38	3093.11	4205.31	5200.31	3571.76	5731.81	4402.74	4119.28	4818.5	4206.43	8390.12	3615.88	4229.85	3899	4665.81	3518.26	4391.33	5195.93	1640.67	4620.91	4097.06	4244.66	4396.89	3819.08	6030.24	6369.45	5816.23	8247.83	3562.03	3780.76
P48962	112129	110455	759517	116876	51165.2	63158.1	60932.8	42733.2	212432	117194	669635	121307	91925.4	78303.8	245354	56733.8	92835	202149	90442.8	162821	43636.4	48069.6	53752	301111	459370	204436	355131	154246	146417	67641.5
P49025;P49025-3;P49025-4;P49025-5	2671.07	0	0	0	7181.61	7842.89	11357.3	10230.1	0	0	0	0	2309.54	2905.01	1618.31	5247.5	0	0	0	0	1976.27	1638.13	3734.89	2070.74	11760.7	0	1050.71	0	1417.28	1730.29
P49135	0	0	0	0	792.438	681.075	721.723	577.147	0	0	0	0	923.405	0	0	972.293	0	0	0	0	847.698	896.687	944.7	809.642	0	0	0	0	852.939	591.614
P49312	1228.53	0	9912.42	10051.9	15907	7735.07	23210.9	9681.27	33807.5	12528.5	18455.2	13101.7	5055.59	2038.02	9442.25	3616.67	50779.7	1296.79	17397.8	105679	1795.76	3528.99	880.592	462.462	0	14469.1	0	21040	2607.59	7302.61
P49442	0	0	0	0	671.415	1008.38	1104.22	1191.34	0	0	0	0	978.153	0	0	1251.41	0	908.448	0	0	2359.45	1754.57	2203.39	2103.15	0	0	0	0	1767.9	2497.35
P49443	0	0	0	0	3173.01	4565.72	4968.98	3236.76	0	0	0	0	2514.35	1766.25	1794.53	2272.52	5366.16	0	0	0	3522.1	3755.54	3996.44	2486.93	0	0	0	0	1794.7	2258.24
P49446;P49446-2;P49446-3	0	0	0	0	2321.88	2037.43	1509.97	2520.01	0	0	0	0	0	0	0	1134.08	0	0	0	0	433.42	564.74	448.955	0	0	0	0	0	0	331.75
P49615	3656.04	0	3333.46	3968.52	4361.8	4657.27	5018.09	4729.12	0	2445.15	2489.19	0	3567.41	3200.88	3671.06	3302.79	0	0	3248.89	0	7321.66	7825.99	8011.37	6736.68	1095.52	1470.25	1925.75	1459.91	4229.67	4804
P49722	54888.7	9624.67	7659.35	5396.58	10526.3	9006.44	12905.2	8411.04	10967	0	3245.52	8685.77	12225.5	14021	9399.15	11747.6	11985.3	19871.5	66113	12481	3102	4086.91	4966.09	2618.5	9403.38	9902.8	17214.4	11652.2	4487.75	4187.61
P49769;Q61144;Q61144-2	0	0	0	0	0	0	0	0	0	0	0	0	0	0	0	0	0	0	0	0	413.688	314.326	628.202	5557.64	0	0	1485.89	0	931.638	346.879
P50114	0	1751.64	6538.94	0	541.11	1375.39	1998.17	689.296	0	1744.1	8137.51	0	1420.14	1111.4	2757.49	848.155	0	1147.2	0	0	620.386	446.011	623.704	1611.61	746.022	0	536.551	0	313.98	309.459
P50153	0	0	1902.11	0	3173.51	1940.67	6485.93	1753.15	0	0	0	0	4062.9	0	1536.61	1879.49	0	0	0	0	2336.98	2944.33	3565.91	3200.14	3997.34	0	3971.01	0	3636.17	3674.86
P50247	37236.6	11022.5	16322.6	5741.58	2924.8	4329.68	5144.71	3490.07	10451.7	10432.6	11841.8	11935	3811.35	3319.64	10619.3	3736.51	17344.1	8720.15	38370.4	13215	4613.57	4806.28	5647.75	5557.41	5644.08	3826.04	4735.5	6248.65	2806.81	3447.13
P50396	14110.9	12900.9	6196.28	10689.9	22647.3	23219.5	29739.9	21716.7	14561.1	23079.5	10119	11229.2	18112.6	16019.9	16539.7	21995.5	11636.4	15513.8	14121.6	6766.81	33657.2	30875.1	33857.1	25418.5	8808.51	10751.1	12259.6	8860.64	15279.3	20623.6
P50405	0	0	0	0	3324.49	2389.75	0	0	0	0	0	27754.4	9035.38	9451.75	4266.24	9759.64	30988.2	27168.8	0	0	1778	648.518	1024.3	0	0	0	0	0	4632.02	6252.25
P50427	7792.2	5796.79	3364.24	8118.87	0	765.927	841.319	867.847	0	5661.82	0	0	1483.48	2373.63	0	1456.11	5215.98	3395.96	0	0	411.422	579.798	370.365	284.654	19714.6	26703.7	22020.9	22848	4975.89	4478.27
P50429	0	1935.16	0	0	0	0	415.796	278.744	0	0	0	1480.48	0	804.737	0	655.788	0	0	0	0	272.736	435.643	473.779	600.424	2403.3	3347.97	9735.05	2700.06	733.521	1112.44
P50516	11839.2	11565.4	10332.1	13344.5	23408.1	22087.8	28651.5	25435.4	14801.5	17080.6	11331.4	12241.6	21619.3	23147.1	14200.9	20042.2	10307.3	13350.5	42569.3	8276.61	86013.9	86267.4	84477.2	73785.9	12828.6	16605.6	16964.5	15568.2	76741.2	94899.6
P50518	0	1626.44	3427.06	0	5227.77	7990.05	10853.8	4404.03	0	0	3855.17	0	5723.65	6759.25	7174.12	6012.65	0	1939.06	18752.5	0	26991.6	36099.4	45104.7	22099.8	1533.51	1838.45	3321	2276.09	15047.5	16519.3
P50543	30355.7	0	84672.9	8427.9	4500.69	7275.81	4796.9	6723.72	8495.01	0	46948.5	57874.8	16411.4	13043.8	22273.7	6127.75	22149.8	18498.7	155098	40900.7	647.438	1520.12	2981.08	2199.44	4326.67	11598.8	3630.13	18613.6	2027.33	1060.85
P50571	0	0	0	0	4111.39	5599.51	13971.1	5555.8	0	0	0	0	1310.37	0	1186.95	1134.97	0	0	0	0	316.85	354.868	0	140.185	0	786.257	0	0	425.088	672.013
P50586	0	0	0	0	7127.6	5755.51	4530.37	5261.61	0	0	0	3176.1	3650.24	3874.17	3188.4	2569.35	0	0	0	0	1416.5	1704.22	801.672	1170.65	0	33115.9	0	0	2531.3	4856.55
P51125;P51125-2;P51125-3;P51125-6	0	0	0	0	2023.92	2676.46	2718.46	1918.69	0	0	0	7575.09	5357.7	5855.43	4725.35	2995.24	0	4470.72	0	0	10195.8	13808	16034.8	7643.93	0	0	1286.74	0	5341.87	5757.65
P51141	0	948.861	0	0	1853.64	1563.17	1439.83	1350.15	0	0	0	0	1545.91	1302.79	1188.98	797.161	0	1686.44	0	0	1518.03	1443.29	1586.4	1295.7	0	0	379.772	0	606.863	711.805
P51150	9667.05	0	19639.9	0	72587.5	79736.6	121125	59001.7	2797.21	0	21873.5	2976.15	32613.2	18572.4	47322.9	28755.8	7331.92	9226.08	50332.8	0	27360.7	30255.1	37533.7	30751.1	10587.8	6425.51	9280.77	9977.41	12535.7	13666
P51410	0	0	14661.3	2712.03	1381.46	1968.28	4185.54	1678.87	3204.82	0	1782.63	9403.83	874.51	3787.18	3486.5	1372.85	0	3197.56	6479.95	0	518.43	918.188	682.48	1195.38	0	0	0	3742.99	0	0
P51569	0	0	0	0	0	0	0	0	0	0	0	0	0	0	0	904.429	0	0	57042.6	0	0	0	0	0	0	0	0	0	0	0
P51660	0	0	3807.97	0	0	1033.63	934.134	730.3	0	0	3629.64	3779.05	0	0	1907.2	1602.52	0	0	30230.6	0	805.275	713.928	1636.03	1290.43	2522.24	4706.99	3835.49	6337.06	952.327	1469.37
P51667	0	0	21788.7	0	0	2577.64	6505.26	0	0	0	21989.4	174859	86318.9	71288.5	57882	14675.8	41628.2	70159.5	25988	82463	2300.47	2960.42	4226.07	1221.57	3717.03	5686.29	5566.74	5769.54	1036.64	952.366
P51830	0	0	0	0	0	493.072	506.203	500.239	0	1549.48	0	0	992.883	1249.25	0	748.912	0	0	0	0	1856.07	1530.42	1204.59	1768.55	2148.49	2118.92	1803.95	2105.55	1250.99	1114.99
P51855	13593.5	3206.02	9029.32	4287.81	3671.34	5049.24	6040.88	3873.28	0	2187.23	6205.79	6162.54	1798.29	1201.27	2422.69	4180.49	6960.39	2768.97	89604.2	9776.12	1054.65	1062.86	1359.51	1137.14	1646.38	4183.55	1805.12	5552.87	954.499	1035.47
P51859	0	0	0	0	0	1050.59	6417.85	1568.23	0	0	0	13821.7	5923.95	4911.04	5393.82	1272.47	0	7099.37	0	0	315.794	284.67	0	0	0	0	0	0	0	0
P51863	9758.86	7706.33	7601.63	5168.93	6221.58	4655.3	4706.28	3705.62	6926.25	5384.03	11459.7	8770.92	5545.28	4954.93	11249.8	4111.63	5033.21	9517.48	8470.6	9741.55	21165.1	25735.8	26409.2	23865.8	10523.8	6309.9	13323.9	5371.76	13845.3	15448.2
P51880	0	0	0	0	0	0	0	0	0	0	0	0	0	0	0	0	0	0	0	0	0	1	0	227.42	0	0	0	0	0	0
P51881	88517.9	80959.4	619542	82439	33198.7	45814.6	44136.1	27158.9	134122	77689.3	547498	67763.9	64910	45665.6	220516	34169.4	70433.1	172071	92067.9	96614.5	37927.1	43227	43412.2	423777	367600	139738	298452	117264	121991	52190.1
P51906	0	0	0	0	1131.9	1235.29	605.31	939.588	0	0	0	0	0	0	0	1698.63	0	0	0	0	1108.27	643.968	718.501	1102.73	0	0	0	0	455.435	742.243
P52196	0	0	0	0	0	0	0	0	0	0	0	0	0	0	0	1336.73	0	0	40504.8	0	448.639	0	847.739	0	0	3857.24	0	3738.15	602.956	743.247
P52479;P52479-2	0	0	0	0	2025.53	1502.12	2469.76	2425.82	0	0	0	0	738.726	0	771.037	749.058	0	0	0	0	693.553	566.714	647.257	576.474	0	0	0	0	218.363	282.552
P52480	138183	118136	180754	98948.9	69037.3	101795	102802	86220	103293	99461	115613	99575.3	76837.3	73127.1	95823.1	72236.3	224658	104520	258942	109633	126653	114761	128414	118506	60470.4	61728.2	59414.2	63567.2	89059.9	91402.7
P52480-2	56720.5	59138.1	50956.5	66104.6	35817.5	41436.3	42962.1	39173.2	64583.2	67448.4	47940.4	40267.8	34630	31978.4	53234.4	34945.4	44990.9	41149.5	24433.1	35353	63429.4	62337.9	62279.2	62546.2	32128	33051.6	32273	38376.7	59683.8	63413.2
P52503	0	0	0	1135.94	0	725.544	1609.75	214.359	0	0	2135.32	2785.7	1576.98	1389.64	1462.55	2287.46	2224.32	2542.07	0	3570.34	564.762	609.341	677.254	605.507	1467.75	1408.16	1427.33	1535.91	900.363	679.652
P52760	0	0	5212.38	0	1119.44	1514.38	1331.13	1216.49	0	0	6415.63	0	1774.76	2565.34	2963.32	145.068	0	3053.37	0	0	719.841	1013.98	1059.56	1934.77	2207.84	0	3177.74	0	1197.81	1496.51
P53026	1950.4	0	24443.8	0	7191.56	6101.74	18467.7	5692.97	3452.61	0	7555.91	0	3176.57	725.128	5983.49	1524.43	0	1659.14	3035.29	0	423.355	519.285	389.969	4017.39	0	0	0	1673.72	329.143	150.076
P53395	0	0	0	0	0	232.243	291.166	0	0	0	0	0	711.582	0	0	621.178	0	0	0	0	303.543	299.845	472.343	225.56	0	1997.1	1516.13	1033.6	642.809	601.428
P53612	0	0	2528.26	0	2721.86	2573.78	3100.66	2422.17	0	0	0	0	2123.51	2452.95	2530.68	1509.02	0	1320.25	0	0	3565.73	4487.85	4410.81	3776.02	677.542	0	1368.45	0	2523.5	2940.14
P53776	0	883668	731877	945047	247828	690321	280512	240688	1.10372e+06	1.1816e+06	1.37971e+06	0	419000	0	763360	355467	2.68394e+06	922929	0	4654275	84773.1	124731	39302.5	113546	390184	567110	633771	672692	116153	73297
P53810	0	0	0	0	2204.84	2771.27	2687.69	2097.78	0	2375.78	0	0	2485.07	2712.28	2047.29	2010.2	0	2483.25	0	0	6325.07	7188.03	7428.6	5856.8	1753.15	1921.45	1548.96	1577.21	3985.18	4958.26
P53986	0	7000.17	7542.68	5969.11	3158.3	533.002	2026.71	2912.86	8606.34	3350.21	13277.9	3059.26	988.552	3719.35	5395.34	1129.71	0	2192.93	2772.51	3765.39	1657.4	1649.47	1047.05	3277.37	2273.33	2407.65	2530.71	1157.78	1163.8	1119.14
P53994	2972.45	1879.52	4136.43	4006.77	9776.07	10244.6	18460.5	8868.15	3572.71	3168.13	3807.24	8847.11	5191.85	3345.61	7080.86	4800.12	2793.61	2605.15	6628.31	3058.07	5840.91	6630.28	7116.46	5820.92	3613.53	3545.6	4052.1	4383.29	4171.3	4346.26
P53996;P53996-2;P53996-3	0	0	0	0	3648.43	2494.02	2332.02	1724.72	0	0	0	0	1427.3	1826.54	1743.97	1385.04	0	0	0	0	301.099	520.505	602.711	240.577	0	0	0	0	224.138	96.846
P54071	12918.7	7131.83	5748.47	6311.19	2523.8	3147.26	2636.02	2528.88	10488.4	5433.84	7318.09	11078.2	4971.3	4286.34	4817.8	3508.07	8930.24	5511.54	33696.6	13580.2	3320.36	3408.73	3778.46	2984.16	4531.27	7026.49	6293.48	11492	4145.93	4284.55
P54227	0	0	238237	1.18788e+06	129643	6028.96	59461.2	33016.6	0	0	3932.64	89804.4	34835.4	44121.5	30324.5	16924.5	106191	63162.8	78662.9	170474	5107.56	18662.8	11879.5	28816.5	98005	848.071	154730	917.547	38066.8	8937.42
P54285	0	0	0	0	911.317	1363.79	1737.57	1006.95	0	0	0	0	1050.03	1852.42	1492.09	660.202	0	0	0	0	4299.44	5127.95	6673.77	3744.31	0	0	0	0	1260.22	1877.81
P54728	286703	105296	69119.2	0	7432.21	9810.64	13364.2	6356.77	0	0	2386.06	11981.8	7733.21	6602.13	6318.35	3754.48	0	3942.27	15443.8	0	5339.57	6585.32	6271.26	4519.17	0	1107.02	807.86	2160.82	3297.68	3917.84
P54775	0	0	5423.83	0	7390.73	7741.08	14065.1	6860.65	0	0	0	0	2474.07	1718.57	3079.13	2198.5	0	0	9762.64	0	1260.27	1612.64	1859.38	1148.64	0	0	0	0	1369.42	1483.47
P54822	0	0	0	0	0	1183.73	1281.46	944.388	0	0	0	0	1234.14	0	1337.64	700.792	0	0	0	0	1994.53	1956.73	2047.08	1707.85	0	0	0	0	1558.14	1698.88
P54823	0	0	3263.75	0	3673.56	3567.01	5397.69	3925.53	0	0	0	0	1246.61	0	2045.26	1152.08	0	0	3401.42	0	415.644	319.322	681.222	358.874	0	0	0	865.281	0	203.711
P54830;P54830-2	0	0	0	0	3013.05	1620.59	2194.02	1928.72	0	0	0	0	861.791	1508.06	1492.34	2449.78	3336.38	2985.07	0	0	1768.98	1840.84	2367.55	1615.39	0	0	0	0	766.903	925.283
P54923	0	0	0	0	2254.52	2076.05	2508.77	1925.05	0	0	0	0	2397.97	1616.5	1529.04	1802.75	0	0	0	0	2972.25	3224.44	3136.79	2047.08	1073.55	1388.68	1092.37	1346.61	1467.48	1818.59
P55012	3922.24	3433.98	2162.51	2041.4	2425.46	2955.12	1580.89	2948.08	2604.03	4014.04	0	0	2110.88	2567.1	3497.46	2486.22	2555.92	1626.73	0	0	5664.43	5640.17	4164.63	4778.72	2052.47	2655.17	1515.9	1508.93	1950.76	2680.64
P55066	0	0	0	0	0	0	2190.55	0	0	0	0	0	0	0	0	107.736	0	0	0	0	287.546	167.501	216.845	163.914	0	0	852.435	426.139	0	0
P55088;P55088-3	11839.6	7776.42	409968	4456.28	3498.48	7793.73	5740.96	3329.13	25834.1	7207.92	309550	3297.76	21997.8	4934.29	83177.1	6895.77	5556.22	69862.1	0	9470.64	6442.13	4335.68	5688.46	119178	172218	7110.33	71036.9	4162.88	19499.3	3882.71
P55096	4559.54	4825.01	3898.85	4824.36	2030.1	1444.92	2840.85	2235.56	4450.55	4687.58	3190.56	1773.05	2245.77	1868.33	3159.49	2174.71	4349.06	3609.7	8536	2958.84	1192.4	1001.64	1125.28	1105.41	8882.38	8310.69	7236.74	8860.56	2018.31	2386.6
P55097	12614.7	5428.65	15839.2	3241.1	2125.15	2455.47	1628.5	1447.29	0	0	5940.39	5797.23	1050.03	0	2538.68	5820.25	3122.83	0	117193	7978.9	413.859	589.387	424.178	375.545	2164.22	8239.6	1229.29	10681.2	246.181	273.912
P55258	0	0	700.054	0	0	0	0	0	0	0	0	0	0	0	0	0	0	0	0	0	147.999	142.352	151.7	332.366	0	0	0	0	175.789	107.597
P55288	0	0	0	0	0	831.243	1305.16	824.527	0	0	0	0	0	0	0	1556.43	0	0	0	0	721.464	742.933	791.126	518.892	0	0	0	0	1053.75	1025.04
P55302	0	5215.46	3872.31	5878.98	1209.63	1066.25	833.146	803.787	6550.68	4782.53	3487.15	6823.69	2461.32	1975.36	1031.01	2214.67	4082.98	3680.86	0	5100.13	416.282	2352.69	826.255	247.1	36913.3	49864.1	40752.5	38170	7737.89	7989.23
P55821	0	0	0	0	1546.88	1962.91	2763.33	1404.96	0	0	0	0	4582.81	3849.4	4269.71	1864	0	0	0	0	5974.45	6450.31	8275.68	4580.87	0	0	0	0	2346.55	2752.18
P56135	17730.9	10629.9	118471	13132.6	4747.35	7088.58	4901.44	2761.06	28285.2	11433.4	123418	16876.5	18670.1	13412.1	46010.2	5009.16	15271.4	68726.2	12331.2	22143.3	6937.52	6845.45	6931.92	185250	134656	18978.5	79807.2	15747.1	35056.1	8523.32
P56212	0	0	0	0	2228.3	3878.64	3766.87	1859.5	0	0	3953.06	13940.6	5155.66	4288.4	4097.5	2282.59	3024.36	4858.06	0	13037.5	2834.14	4197.49	5089.06	2035.01	0	699.898	810.136	0	1241.29	1147.34
P56371	0	0	0	0	2961.63	3754.7	4571.38	2933.53	0	0	0	0	2098.87	0	3129.59	1568.67	0	0	0	0	1489.07	1760.35	1974.37	2767.53	1010.78	0	1220.01	0	914.163	999.453
P56375	18708.1	5470.72	9174.72	0	4412.79	3655.49	3385.05	2629.31	30032.5	21422.2	12391.7	18026.8	2707.34	6054.74	7462.51	2495.63	17238.9	2674.2	0	25976.2	6562.83	9229.7	11581.7	5449.6	5992.82	1617.77	6370.99	4858.5	2911.91	2987.59
P56379	0	0	1672.41	0	0	0	0	0	0	0	2762.68	0	0	0	0	0	0	1088.82	0	0	157.059	191.729	0	985.227	3366.44	0	1609.61	0	599.405	161.354
P56383;P56384;Q9CR84	0	10137.5	24173.8	8701.84	6985.78	6008.75	4066.26	3404.39	8338.77	8251.67	144691	9257.63	5485.99	8657.84	6394.86	0	12508.2	38380.2	120142	7153.49	7787.6	6501.02	11624.9	44266.2	25759.3	11888.6	21511.7	6081.72	11967.7	8881.08
P56387	0	0	0	0	10937.5	9355.34	8759.19	5241.63	0	0	0	0	10511.4	9170.49	12228.5	8355.35	0	0	0	0	3668.42	3744.83	4025.08	4127.2	1950.31	1888.45	1924.15	0	1897.45	1368.5
P56389	0	0	0	0	0	756.028	1197.48	0	0	0	0	0	0	0	0	0	0	0	0	0	1041.45	1215.32	1822.36	923.431	0	0	0	0	449.713	649.425
P56391	1075.88	3745.29	4440.04	0	399.684	1896.57	2352.72	935.665	1785.64	5746.01	10502.1	78493.4	25541	18679.6	12731.5	5830.32	10083.4	14924.2	5388.01	25149.8	964.024	1617.1	1498.82	1897.32	9038.3	9398.44	8540.23	10323.2	3787.71	2222.73
P56395	0	0	0	0	0	0	0	0	0	0	0	18748	6186.46	4811.5	4639.05	1564.68	0	2801.9	0	0	0	0	277.445	281.435	2405.02	3599.01	3293.62	3009.19	0	739.271
P56399	8686.02	6642.28	5583.63	8519.12	30693.6	26352.1	26985.6	28396.1	10324.8	11648.4	4081.6	7164.64	24270.6	20485.4	13850.7	18970.5	6725.73	7421.03	13550.4	5796.52	43049.3	40171.3	43599.9	34932.8	4401.21	5223.82	5367.16	7512.12	21495.4	27464.8
P56480	64609.4	89987.6	88150.9	106273	17999	23734	21569.7	15282.3	91214.8	98375.8	79905.7	138426	35314.1	48787	49493.1	29653	73649.8	78226.2	183964	113361	20221	21961	18897.3	26632.5	113634	142260	134521	129210	44418	33984.4
P56546;P56546-2	0	0	0	0	436.672	0	471.633	657.346	0	0	0	0	0	0	0	0	0	0	0	0	2230.26	2253.66	2074.78	1556.32	0	0	0	0	908.396	985.768
P56564	13204.3	20824.9	10319.5	10838.2	6868.67	4671.04	6760.63	6786.53	16635.6	21156.6	12259.5	10602.8	9902.43	6375.69	5078.33	13470.9	11912	12679.8	6783.1	14260.5	39335.9	23759.3	19720.3	30132.3	58801.4	52065	55891.3	40163	47207.7	40376.5
P56565	0	0	3824.06	0	0	0	643.381	0	0	0	0	0	0	0	2115.36	0	0	0	0	0	0	0	261.396	1419.08	0	0	1052.91	0	625.201	0
P56695	1783.55	0	0	1228.51	952.892	450.329	490.539	957.727	3775.53	4258.19	0	0	1650.96	1300.09	0	2096.8	3934.7	3997.44	0	0	3494.35	2409.28	1772.7	2486.18	5056.79	6437.18	4910.16	7111.64	2279.04	2055.94
P56812	0	0	0	11678.7	3187.25	4165.28	4569.79	2167.45	0	0	19308.9	11555.6	7013.05	6365.45	7062.75	2799.76	0	2574.63	0	36344.6	6616.12	10580.6	15268.8	6560.58	1512.47	0	0	0	1809.87	2117.8
P56873	0	0	0	0	0	311.171	594.256	0	0	0	0	0	0	0	0	0	0	0	0	0	591.53	634.024	841.435	536.995	0	0	0	0	383.204	331.109
P56959	5619.69	0	8721.22	4555.95	22726.2	19168.3	51183.5	18715.3	0	2397.26	4261.59	18358.3	6019.02	10829	14626.4	5026.46	0	5621.51	0	7021.58	3270	3363.38	4331.38	2409.42	0	0	0	1616.27	1517.14	1511.87
P57716	0	0	0	0	2231.37	2161.86	4992.29	1956.86	0	0	0	0	1274.25	0	1329.54	1094	0	0	10972.5	0	1194.56	1504.63	1559.24	1022.37	3508.87	4760.56	4105.43	4055.71	1246.28	1347.32
P57724	0	0	0	0	0	0	519.712	0	0	0	0	0	0	0	0	0	0	0	0	0	0	0	0	0	0	0	0	0	0	0
P57746	0	0	0	0	1525.5	3524.91	3741.45	1606.58	0	0	0	2569.48	2317.49	2763.66	2095.26	1422.88	0	0	10974	0	6514.26	9626.48	9436.24	6245.76	967.174	886.195	1064.81	756.927	2029.19	2185.38
P57759	25107.8	44512.4	33610.4	45176	8956.41	12167.8	13596.2	11781.4	40204.5	46221.5	33107.2	41474.9	16212.2	16547.1	14668.3	17216.4	25569.8	28802.9	15523.6	27456.6	2368.38	2517.88	2847.38	2097.89	283091	387076	299937	314314	71052.8	71556.7
P57776	0	0	3171.78	0	2170.82	2431.73	3819.85	2189.16	0	0	786.745	4222.09	2177.12	1957.16	2371.69	999.861	0	0	0	0	1811.53	1844.37	1892.56	1640.36	0	0	0	0	804.668	763.757
P57780	37480.1	7823.35	19821.6	14295.5	15870.7	13382.4	12101.6	15561.4	16386.7	5864.97	8866.88	21670.7	8537.24	8903.24	15708.8	9112.77	14262.5	8507.04	38996.3	247833	5815.05	8808.01	9442.18	6676.03	6533.7	2885.33	4349.83	24761.5	2853.21	3345.96
P57787	0	0	0	0	0	0	0	0	0	0	0	0	0	0	0	0	0	0	0	0	0	169.261	281.516	1984.69	1284.83	0	1033.53	0	0	445.112
P58021	0	0	15054.9	0	0	784.423	702.296	0	0	0	12067	0	0	0	5357.91	1112.07	0	0	0	0	1190.23	816.456	646.259	5401.49	4123.43	1886.66	3685.43	2878.96	1520.23	1043.76
P58252	26566.9	10175.3	65080.3	10561.5	22537.4	18280.5	17193.4	21185.3	12457.9	13070	13623.4	19679	14489.8	14714.3	17914.4	13918.3	34633.2	11593	110342	21007.1	4116.13	5146.79	5032.74	3546.38	7211.59	8307.75	5070.35	16511.6	3173.75	3398.27
P58281;P58281-2	1224.01	0	1439.66	1654.98	6062.04	6433.29	8904.18	6779.65	1470.77	2305.4	1496.2	2052.65	2287.8	1117.38	1302.32	2957.59	2236.68	2424.72	3326.9	1072.92	1706.6	1521.99	1997.06	1337.06	4389.33	5054.18	5004.67	4568.53	3235.65	3386.9
P58389	0	0	0	843.345	2634.48	2437.88	2346.35	1225.71	5797.58	0	3989.23	0	3083.74	1772.47	4113.89	1943.79	0	0	0	0	2389.31	2631.82	2545.18	2421.6	1157.92	2629.68	0	0	1521.17	1947.22
P58391	0	0	0	0	1361.67	1356.78	1870.21	1978.21	0	0	0	0	0	0	2157.17	1059.65	0	0	0	0	3445.23	3338.17	2766.43	2477.01	1080.65	1661.78	0	0	1907.83	2645.76
P58404;P58404-2	0	0	0	0	0	265.785	311.49	512.67	0	0	0	0	0	0	0	409.312	0	0	0	0	528.692	295.641	261.201	379.297	0	0	0	0	206.527	334.534
P58771	10345.6	8324.69	11416.7	8042.92	9341.28	11887.7	15694.2	7362.43	11476.2	4208.35	94369.7	669778	392731	324036	318356	94921.6	214456	471975	264037	173858	9134.36	11509.7	14525.7	6479.14	7139.24	7829.94	6587.51	13412	4907.62	5767.25
P58771-2	0	0	0	0	0	0	0	0	0	0	3448.84	38020.6	21230.5	14979.5	14409.6	3274.68	12003.2	18708.9	66392.4	0	0	0	0	0	0	0	0	0	0	0
P58774-2	0	0	11918.5	0	0	842.765	0	0	0	0	9794.7	17647.4	10711.5	12237.4	12176	3075.59	9943.11	18698.5	101866	11329.9	926.642	0	2104.76	823.898	0	0	0	6421.67	205.258	416.821
P58871	0	0	0	0	0	0	0	189.268	0	0	0	0	0	0	0	127.975	0	0	0	0	82.4715	0	18.5929	0	0	0	0	0	0	0
P59017	0	0	0	0	0	1379.95	1845.41	1032.66	0	0	0	0	0	0	0	0	0	0	0	0	2181.86	2153.54	2716.41	1876.26	0	0	0	0	1250.57	1401.54
P59108	0	0	0	0	5209.47	3171.09	3747.95	3589.74	0	0	0	0	3400.88	3253.61	3383.49	3052.92	0	0	0	0	3607.28	4557.91	4236.83	2898.69	7953.33	12266.3	5786.79	0	1540.48	2436.79
P59266	0	0	0	0	0	1	0	355.408	0	0	0	0	0	0	0	0	0	0	0	0	200.741	0	152.549	872.094	0	0	0	0	0	0
P59279	0	0	0	0	0	0	54.4228	0	0	0	0	0	0	0	0	0	0	0	0	0	194.527	92.9749	101.009	226.035	0	0	0	0	0	0
P59325	0	0	3577.5	0	3247.48	2823.31	4595.21	2989.72	0	0	0	1573.75	3886.26	3303.1	2149.29	2236.38	0	0	5465.88	0	3212.99	3315.1	3729.63	3062.81	0	0	0	0	1358.03	1786.88
P59326	0	0	0	0	1635.89	1757.23	2436.99	2841.49	0	0	0	0	728.443	0	831.719	953.622	0	0	3318.29	0	635.092	845.052	562.441	679.191	0	0	0	0	322.164	227.265
P59328;P59328-2;P59328-3	18743826	10577363	11555657	8870202	1.66997e+06	1.67434e+06	903729	1.35046e+06	11701620	16725430	8984116	7.92979e+06	3.21906e+06	3.67969e+06	1.56684e+06	3.59647e+06	11816005	10213051	6.48479e+06	5141559	1183101	852036	635328	716981	6373709	9678710	8970320	6.22993e+06	2.29866e+06	1.71504e+06
P59481	0	0	0	2649.65	5154.31	3953.24	9623.57	3856.98	0	2256.87	0	192797	4172.66	33342.8	4151.47	2311.67	0	211705	0	0	700.806	3932.93	894.708	599.151	6190.03	8247.35	6792.21	7631.76	1521.61	1522.62
P59648	0	0	0	0	0	308.043	209.115	0	0	0	0	0	0	0	0	696.599	0	0	0	0	2017.34	2783.39	3762.01	1494.55	0	0	0	0	1138.23	1457.7
P59672;P59672-2	0	0	0	0	0	363.048	0	0	0	0	0	0	0	0	0	679.606	0	0	0	0	1167.62	912.273	738.073	1008.68	0	0	0	0	1004.45	699.587
P59999	2883.81	0	37252.9	0	1796.59	2745.74	3951.49	2642.78	0	3133.49	34313.1	4855.16	4645.62	2429.32	20901.9	1892.9	6447.16	13135.1	25199.7	5544.35	3977.51	3819.12	5409.95	27163.7	14247.5	3494.94	10400.2	10427.1	4657.58	2215.06
P60122	0	0	1264.22	0	2369.04	2574.91	3587.14	2836.59	0	0	0	0	1109.26	1990.14	2057.43	1113.29	0	0	0	0	1186.35	1255.6	1277.16	722.399	0	0	0	0	706.765	645.245
P60202	1.36777e+06	908592	30267832	634011	391974	611638	365968	335216	2.62385e+06	1.13799e+06	36328432	903316	2.60634e+06	868933	7.79343e+06	653884	684221	12402356	710273	634738	744852	613005	403700	15741392	4764518	390828	4.0825e+06	225596	1.64413e+06	159634
P60229	0	0	3119.48	0	6636.62	5755.75	10793.4	6542.52	0	0	0	0	2143.89	1484.41	3455.59	2081.86	0	0	0	0	655.57	698.724	918.018	726.058	0	0	0	1571.5	280.063	473.626
P60335	3140.94	0	9407.49	0	10434.7	10364.6	13759.8	10914.1	0	4487.31	0	0	12251.8	5647.59	13399.4	10330.4	0	3311.63	9961.8	0	25683.5	25729.1	26344.5	21095	2945.7	2368.82	3145.1	5153.26	7131.41	9905.13
P60469	0	0	0	0	1152.66	1088.8	944.651	1561.04	0	0	0	0	1041.35	1314.57	1384.9	1274.94	0	0	0	0	5239.99	4884.51	5087.98	4384.57	718.775	733.777	891.211	0	2949.84	3741.35
P60487	11604.7	26789.4	12096.5	9699.28	3762.1	2957.02	4704.69	2104.75	10748.7	11436.1	7320.09	5725.7	4287.47	4336.99	4112.74	2369.04	13449.5	7085.2	0	8031.65	3425.21	3772.68	3852.48	2923.76	5615.83	10843.4	6199.28	5842.97	2513.78	2710.56
P60521	0	0	1797.11	0	3970.18	5050.71	7196.71	2800.23	0	0	2276.87	0	3498.55	3718.56	4843.37	2256.15	0	0	2852.16	0	2306.77	3270.55	3596.74	2263.67	859.767	0	887.079	847.32	1698.64	2145.14
P60603	0	0	0	0	0	0	0	0	0	0	0	0	0	0	0	0	0	0	0	0	147.121	0	0	979.794	0	0	0	0	495.707	0
P60710	19049.7	27411.3	14417.3	15955.3	26202.6	29530.4	34217.4	33469.4	19080.1	28848.5	32298.9	25188.6	32233.9	28036.6	18475.8	41788.2	24145.3	35675.3	13037.9	27851.7	56087.4	57925.2	60344.6	65340	18503.8	20235.2	24232.2	14935.5	38278.5	45921.7
P60761	0	5705.81	4226.72	6792.64	3478.1	3406.93	3525.27	1216.66	13305.3	15963.7	17401.8	15016.5	5959.16	8556.15	5453.63	6850.66	46053.5	41915.3	26767.7	108911	6523.08	6307.91	5154.47	11342.9	5104.02	8054.24	4896.31	6139.86	2617.7	2248.69
P60764	25365.9	23970.6	58205.7	24077.3	37042.6	41471.9	43670.5	35245.1	33463.1	27107.1	62655.7	18583.8	32356.3	27702.2	36105.7	27206.7	16693	37279.9	40618	0	62262	62468.8	70916.1	86116.8	42541.6	18507.9	28179.1	18465	37242.8	38815.9
P60766	3850.3	4027.93	6831.78	3458.6	10319.3	11101.7	10711.3	12503.8	5467.46	4188.01	11737.6	5252.54	8341.64	8246.06	9434.69	8037.81	4649.69	4653.04	21109	5599.03	12771.6	12450.4	13615.9	13457.4	3993.35	4146.57	4122.59	5385.03	6228.31	8224.41
P60766-1	0	0	3208.86	0	8838.61	6660.86	7563.3	5503.37	0	0	0	0	7041.04	5433.18	5742.11	4362.32	0	1496.25	0	0	15729.7	13882.5	14843.9	12610.6	6485.03	2346.14	1587.65	0	7261.01	10868.4
P60824	0	0	0	0	5230.73	2799.7	10953.9	3126.01	0	0	0	0	2320.29	2139.37	3566.07	789.252	0	0	0	0	0	0	0	0	0	0	0	0	0	0
P60840;P60840-2	0	0	0	0	6551.8	11755.6	9917.5	4650.65	0	0	0	0	6383.6	9023.83	10012.2	5078.74	0	0	0	0	7334.36	10182.7	12179.2	5882.87	0	0	0	0	2722.12	2916.68
P60843	17739.1	7411.99	36435.9	9223.24	42416.4	47606.7	74415.8	39721.6	9243.22	4147.64	5784.63	9574.33	16584.7	9231.62	23794.2	12797.1	7735.77	4864.61	88951.5	0	5572.48	5469.24	6923.12	4096.31	5934.11	5184.57	4670.28	12408.9	1612.69	1902.89
P60879	6705.56	5974.75	5468.65	6070.72	5460.71	7799.05	7451.73	4270.7	6548.13	4818.46	5763.67	7866.84	10778.7	11450.5	8330.94	7080.83	5467.62	4385.58	4082.06	6252.76	35605.6	34106.9	40430.9	28772.5	6402.31	5652.99	4763.37	5252.72	19853.7	24898.4
P60879-2	0	0	0	0	0	157.884	69.6754	0	0	0	0	0	450.648	493.061	0	587.155	0	0	0	0	3024.35	2994.98	3518.27	2502.52	0	0	0	0	988.597	1805.68
P60904	2322	0	3794.01	0	1909.96	2656.06	3117.64	1917.2	0	2960.51	2392.22	0	5550.44	4776.74	4427.2	3608.73	3271.52	2849.09	0	0	15541.6	17466.9	26149.6	20591.4	8790.52	2789.58	5499.52	3055.18	9928.83	9232.32
P61014	0	0	0	0	0	0	0	0	0	0	0	13693.3	9891.59	2961.67	1778.69	606.11	1340.55	3244.16	0	0	0	0	0	0	0	0	0	0	0	0
P61021	0	0	5076.64	0	7535.66	8473.03	10185.5	6597.57	0	0	0	0	5534.34	3546.93	10499.1	3968.77	0	0	9412.25	0	5183.74	5656.4	6169.17	4412.69	0	2591.53	2632.29	3244.8	2910.18	3918.62
P61027	0	0	7349.26	3438.74	1657.28	2032.12	2178.97	1640.45	0	0	5284.32	4312.3	1840.58	567.768	3902.54	1337.26	0	2747.02	6617.93	0	1679.07	2068.12	1562.12	4358.32	3253.19	1876.99	2747.56	2977.04	1381.52	1574.56
P61028	0	0	0	0	0	281.321	151.761	0	0	0	0	0	0	0	0	0	0	0	0	0	139.8	242.034	215.795	378.129	0	0	0	0	182.592	275.177
P61079;P62838	0	0	0	0	0	2785.43	2128.18	1855.21	0	0	0	0	0	1335.14	0	1289.49	0	0	0	0	1070.63	2387.03	2862.09	1623.26	0	0	0	0	714.854	1544.7
P61082	0	0	0	0	2534.97	4995.33	4027.48	2647.84	0	556.471	0	0	2711.14	2305.66	2646.04	2998.85	0	0	0	0	6320.22	6781.91	8346.62	4770.15	700.238	776.224	809.563	1414.62	3382.63	3596.92
P61087	0	0	0	0	1671.66	2784.13	2360.53	1376.73	0	0	0	0	2189.37	1583.15	1843.54	1168.17	0	0	0	0	2456.2	3024.97	3773.55	2538.69	0	0	0	0	1414.68	2246.5
P61089	6818.19	0	9600.72	3881.31	5110.63	7458.16	8804.72	4453.03	7592.57	3979.7	8085.44	12090.3	7015.19	15671.8	10177.1	3493.93	2883.79	8015.78	13739.6	1947.84	10002.7	13541.9	15079	8541.94	2756.73	6474.53	5464.3	3307.56	6851.26	8795.14
P61148	0	0	0	0	580.785	3783.84	226.927	58.2903	0	0	0	0	835.449	982.028	494.083	368.079	0	0	0	0	1729.55	3322.48	3305.98	1767.46	0	0	0	0	725.178	1148.61
P61161	0	0	2060.7	0	5011.66	6781.54	8312.31	6042.05	0	0	0	5668.85	2201.71	5113.1	4915.28	4403.16	4486.12	5590.46	0	0	7455.21	6623.9	7377.04	6039.17	2914.87	2974.57	3595.55	2575.92	4493.77	6640.97
P61164	0	0	654.971	0	5899.87	6312.04	9801.15	5197.46	0	0	0	0	6064.49	4260.69	4787.22	3573.43	0	0	0	0	5529.28	5669.97	7441.34	4590.95	8446.05	0	0	0	2161.23	3025.81
P61202;P61202-2	0	0	0	0	2891.95	3134.47	4740.92	3162.84	0	0	0	0	1692	1750.4	1183.23	2206.03	0	0	0	0	6498.75	6313.68	8519.91	5559.1	4143.57	0	0	0	2856.51	3751.62
P61205;P84078	0	0	34561.4	2972.52	11082.1	17637.2	19375.8	10141.8	4645.86	0	36737	3860.24	14468.5	10844.9	23679.2	7857.54	6671.03	13654.7	26738.2	4953.3	34875	41679	41872.3	54638.5	15296.5	4534.26	9347.46	4719.13	15472.5	17070.6
P61211	0	0	2629.38	0	3695.01	3718.34	6871.04	3162.93	0	0	1074.14	0	1690.17	1244.25	2619.45	1336.64	0	0	4300.48	0	1666.76	1909.8	2129.21	2606.94	0	0	0	1549.62	781.609	750.756
P61226	0	0	3130	0	2545.52	1960.13	4161.33	2443.86	0	0	0	0	1646.56	1350.93	2437.03	1758.99	0	1897.51	3611.75	0	2368.65	3302.21	3185.36	2867.95	2439.41	0	0	2920.93	2168.78	2502.61
P61255	34928.2	8507.96	7373.64	21425.4	15545.5	10520.1	34567.3	10819	34242.3	12032	12506.2	10837.2	5619.6	13747.2	9084.62	3613.08	1905.75	3343.52	6282.3	11261.9	1016.9	907.706	855.771	781.889	1732.83	2087.86	1239.68	3099.41	639.431	1276.82
P61264	29046.1	31525	44928.3	33021.1	18570.3	21414.9	22853.4	15230.6	32883.8	24659.3	30273.4	22731.6	24181.5	19725.9	23193.1	16244.7	19709	19372.3	12551.1	19943.8	34986.1	35422.7	33959.1	37561.9	30780.8	25498.9	27481.7	20729	37600	34148.9
P61290	0	0	0	0	890.24	0	2780.57	394.917	0	0	0	0	0	0	0	0	0	0	0	0	0	0	0	0	0	0	0	0	0	0
P61294	0	0	0	0	5859.69	7123.21	7926.44	3794.79	4999.14	0	2431.45	0	8531.03	7421.55	7634.63	5048.44	0	0	0	0	13280.1	17244.1	19362.9	12382	2186.48	3460.42	4724.46	4751.07	6677.67	7019.73
P61329;P61329-2	0	0	9584	0	5897.47	2299.8	2059.32	2639.74	0	0	0	0	9013.08	7330.22	5550.6	2348.11	12192	0	10445.1	0	2128.98	2802.66	2631.42	1672.37	0	5149.33	0	0	1273.79	1209.95
P61358	19832.9	12180.9	19624.2	13711.6	11859.2	8097.53	14060.1	7723.86	24880.6	8118.31	14500.2	19387	10050.1	11539.9	14205.6	4786.23	7023.45	8286.31	13050.7	18893.1	5029.47	7725.25	9917.35	11666.1	3370.95	3081.82	3404.83	4973.25	1945.14	6340.65
P61514	6318.68	4403.37	2884.57	5192.1	1103.34	458.751	1043.86	514.169	5963.12	5080.91	2871.98	7740.16	0	5782.38	1960.14	819.97	0	3080.58	3101.5	0	412.785	297.963	414.239	417.689	0	0	0	0	0	0
P61620	14800.1	0	13613	0	0	1757.4	2693.42	1285.9	0	0	14907.6	7995.78	2068.15	4357.55	5258.78	1412.3	0	5533.62	11566.1	10249.8	738.935	788.617	617.387	11125.2	10680.1	5549.98	8273.56	6361.66	2237.44	1338.29
P61750	0	0	9163.69	0	2892.65	2128.03	3397.64	1976.01	0	0	11552.6	0	2726.79	875.994	4244.23	1283.61	0	5916.27	0	0	2034.71	2118.65	2931.56	9677.87	3876.05	0	0	0	1470.96	687.24
P61759	0	0	0	0	1892.06	1367.06	1615.94	839.735	0	0	0	0	1323.76	748.634	1883.53	1084.41	0	0	0	0	1394.66	2165.79	1864.35	749.461	0	0	0	0	1028.68	948.893
P61804	5710.62	0	14770.7	0	1295.78	2012.4	1572.6	1009.61	0	2821.16	23534.9	0	4886.53	1695.87	8591.45	1057.27	3447.99	12995.3	9307.22	0	915.224	844.174	2059.49	8362.87	8445.18	596.042	8612.27	3550.89	3279.39	593.249
P61922	7263.74	23607.7	13473.2	21745.5	8747.14	10719.3	10591.1	7833.3	18700.5	25929.9	15630.3	17041.8	8081.74	9348.44	8581.37	10891.7	15935.9	19531.9	9997.08	13928.9	7763.97	6809.54	8261.63	7271.02	23763.1	32896.4	30988.8	25354.2	14860.1	11625.7
P61924	0	0	0	0	0	0	1181.37	0	0	0	0	0	0	0	0	0	0	0	0	0	0	79.8238	0	1407.09	0	0	0	0	0	0
P61957	0	0	2671.97	0	0	824.195	747.733	681.646	0	2350.25	8590.99	40811.3	12079.8	17162.3	7601.73	3559.14	9400.44	15306.6	8495.98	12064.8	1010.22	1168.24	1407.3	919.947	0	0	1193.2	2443.16	723.964	835.941
P61961	2443.67	0	3505.71	0	2065.16	1046.79	1440.14	1131.21	0	2466.47	2793.91	8335.05	1819.4	4932.35	5080.9	2038.77	0	2950.95	5633.02	0	2055.19	2075.38	2620.27	1974.46	0	0	2794.48	1058.36	1092.53	1254.28
P61967	0	0	0	0	0	0	0	0	0	0	0	0	0	0	0	0	0	0	0	0	0	0	0	1664.2	0	0	0	0	213.932	0
P61971	0	0	14752.6	0	0	0	2282.6	1167.86	0	0	0	7428.99	2395.91	2394.63	4620.69	4707.54	20329.4	7602.81	187109	0	585.756	929.111	934.212	3160.73	3358.86	2247.55	2672.22	12425.3	1287.83	469.576
P61979-3	5112.92	3865.58	12867.2	7152.31	26668.8	20789.2	47957.8	23872.1	7915.39	6608.37	7325.53	17691.8	13958.8	11765.6	14792	7571.65	8881.34	12423.1	16381.7	16067.1	6000.64	6816.64	7393.43	5077.72	0	0	1767.64	5549.52	1981.02	2262.6
P61982	11542.4	23150.1	49516.3	34724	100748	160078	206605	145142	27565.7	13584.9	29310.9	27418.4	125349	54227.5	69572.5	77059.9	31884.5	35086.1	54429.8	22548.6	62750.7	97384.1	103800	137038	41690.3	22222.5	38843	52388.4	81184.8	57709.2
P62069;Q9D9M2;Q9D9M2-2	0	0	0	0	2924.97	2919.84	3202.1	2835.3	0	0	0	0	1579	1745.05	0	1644.68	0	0	0	0	2672.13	2651.84	2762.8	2109.14	687.897	953.645	0	0	1568.23	1696.52
P62071	0	0	0	0	1648.47	1513.15	2319.71	1223.24	0	0	0	7063.72	2077.87	1848.64	464.662	745.903	0	0	0	0	2082.36	2276.74	2466.6	1541.69	0	0	0	2068.63	925.362	1185.98
P62075	0	0	0	0	0	1227.77	1355.74	812.854	0	0	0	19818.4	7726.77	4786.69	3018.87	1290.84	0	5606.4	5861.43	0	0	0	299.965	167.543	0	0	0	0	74.8006	0
P62082	0	0	15141.8	2362.18	591.827	631.332	1127.57	650.03	0	0	0	3783.85	691.809	2663.71	2441.04	0	0	0	8349.75	0	0	161.57	344.902	466.95	0	0	0	7566.56	0	0
P62137	0	0	0	0	4874.64	4219.71	5389.48	4059.51	0	0	4016.01	3918.49	1451.17	2970.97	2977.73	2673.83	10495.2	6020.02	4227.8	0	3662.58	3792.29	4219.16	3663.77	1034.4	2302.71	3084.63	3675.05	2226.18	2145.28
P62141	2441.17	6395.45	3967.95	3602.48	11016.5	12923.8	13785.7	11847.1	0	2832.54	739.177	9924.08	4915.65	3333.14	6436.19	7668.89	6947.49	5597.87	0	0	23923.5	16558.9	20914.9	22766.2	3504.74	4464.02	4179.4	4859.46	8885.93	10437.3
P62192	0	0	905.902	0	9208.4	10539.7	16147.9	10106.5	0	0	0	1533.07	3281.51	4682.61	4592.82	3556.08	0	0	9852.59	0	2417.11	3046.17	3790.49	1751.15	0	0	0	0	2130.43	2443.5
P62196	0	0	2212.69	0	3476.48	3470.66	5552.21	3815.03	0	0	0	0	1618.77	1379.84	1916.62	1613.84	0	0	15504.6	0	1407.9	1689.82	1522.91	1200.12	0	0	0	1492.47	1611.05	1698.73
P62242	16400.3	9409.91	15437.6	11102.1	4988.74	2706.68	2863.38	2166.07	15868.8	8484.96	10162.8	14925.9	3927.78	9378.82	6045.99	2870.12	5168.68	6979.79	8260.73	6141.54	1262.67	1511.72	1300.3	1169.72	1973.62	4419.48	2203.17	5910.43	841.75	573.904
P62245	2455.27	0	15497.9	4385.68	1917.07	1520.84	1295.97	944.378	2474.07	4295.6	9665.06	5327.45	2216.21	3217.11	6311.58	728.063	1290.66	5300.98	24864.7	0	732.797	855.288	730.812	10026.3	1685.76	0	1297.23	5074.31	359.678	280.261
P62257	21138.7	25994	16202.4	23077.4	16456.3	10198.7	8130.55	13825.7	27857	23196.2	16945.7	16563.4	12839.1	11359.1	9607.1	12436.5	29141.2	24128.6	8844.41	25911.2	18784.9	18189.8	15364.9	18285.5	27397	28632	26446.9	25102.2	20958.9	26910.7
P62259	15445.2	13707.8	19303.8	15060.3	26364.9	40970.1	41923.8	22226.5	16777.1	16038.6	14983.1	19606.5	18967.4	16763.1	21243.6	15652.7	15920.6	15605	20279.6	19216.8	26214	32738.6	37828.4	25625	10942.6	11361.3	12600.4	17541.4	21141.7	24058
P62264	19940.1	10649.7	18817	17320.9	4316.2	3248.19	4676.88	1905.57	14371.3	11923.5	13671.7	23728	2785.9	24477.4	6806.22	2866.46	10116.9	9375.17	13686.1	11038.8	1271.33	1493.91	1786.7	899.612	1632.45	2121.28	995.553	4621.53	618.546	220.575
P62267	35678.9	17653.1	16365.8	17561.1	8225.04	2084.75	2832.8	6384.28	34610.6	12149.1	12547.7	15619	3867.68	7708.7	4424.78	2104.16	5088.24	5368.16	8037.99	10807.6	1370.85	1393.71	769.382	1962.92	2191.15	2965.49	2185.18	5519.25	677.481	666.275
P62270	35710.3	14088.2	17935.1	33276.9	12966	5499.82	14669	8792.1	40287.9	12093.2	21076.2	31502.8	5225.33	17425.1	12055	3032.92	7058.94	7567.56	11889.3	11497.8	968.398	2021.38	2149.21	1059.55	1607.85	2668.55	1298.02	4696.85	1577.92	271.739
P62281	7169.45	3151.84	16878.2	3703.36	3958.4	3287.59	4253.73	3449.04	0	0	5766.97	7686.93	2295.47	3664.07	3861.73	1828.42	0	0	0	0	1050.88	1468.93	1240.46	2103.52	1513.24	931.425	1521.38	7823.79	1183.08	1330.92
P62301	30628.5	17682.6	17781.7	32533.1	8767.34	4009.88	8450.09	3018.75	31858.2	18517.8	22472	35266.7	5123.53	18283.7	9552.33	3122.19	10797.9	8128.99	13756.4	12155.8	760.4	1854.4	1297.94	1000.71	2325.41	3132.54	2255.53	4206.24	564.051	334.39
P62305	0	0	0	0	1151.24	659.265	5686.69	1693.24	0	0	0	0	627.362	0	2200.88	415.07	0	0	10900.6	0	239.803	282.486	288.176	2500.69	0	0	0	1543.09	0	0
P62311	0	0	1384.15	0	2491.83	2744.08	7958.99	1774.87	0	0	0	9148.13	3126.22	4078.8	3893.83	853.946	2080.13	1126.75	15566.4	2233.14	1456.02	2445.05	3655.33	1217.81	0	0	0	1660.12	413.247	538.548
P62320	6600.2	0	9291.21	4159.22	1085.32	1003.41	2280.45	814.946	3376.14	3054.95	2968.61	5692.08	1244.54	6440.24	2675.4	1072.68	6249.88	3224.72	38403.1	0	599.073	500.5	603.396	797.732	1130.91	1454.53	708.111	5455.84	0	185.58
P62331	0	0	3557.36	0	15429	7331.69	8973.43	7154.17	0	0	0	0	7657.47	5510.11	8718.43	6470.23	0	0	0	0	4861.16	4672	8313.44	4591.23	0	0	1966.68	2603.81	2601.95	3270.91
P62334	0	0	0	0	4162.91	4009.22	7610.5	4508.57	0	3656.84	0	0	1185.15	43944.2	1598.87	1628.37	29876.8	0	0	0	1279.76	1620.85	1500.62	1676.32	19621.4	0	0	1139.12	1257.65	1364.95
P62342	0	0	0	0	0	0	0	0	0	0	0	0	0	0	0	0	0	0	0	0	529.602	0	0	701.499	13187.7	14968	14375.8	13945.7	2948.39	3020.78
P62482	5054.69	4891.03	4456.77	4088.62	17506	25830.5	29595.2	16142.3	4670.52	2980.31	3504.64	5181.19	11752.4	8949.12	9774.89	9855.83	0	2757.53	2212.53	2707.08	15916.1	16722.4	17752.1	13817.6	1837.71	2379.58	2228.03	2406.79	5642.32	6809.9
P62484	0	0	0	0	3672.93	4485.3	4298.09	2650.02	0	0	0	0	3688.02	3871.68	3144.37	1626.89	0	0	0	0	10154.5	12343.5	14555.2	9161.49	1209.59	0	0	0	3333.55	3930.08
P62500;P62500-3	0	0	0	0	3584.77	3687.28	3956.44	2020.99	0	0	0	10205.6	3552.95	8159.3	4521.68	1795.6	0	5501.4	0	0	3716.43	5301.52	5720.6	3302.72	0	0	0	0	1613.32	1684.78
P62631	14669.8	9357.71	7456.98	13986.3	19514.7	15979.9	21404.7	18167.5	17826.5	12184	10770.2	12649.6	11239.4	15111.5	8619.95	11313.4	7640.23	8225.4	8172.79	14746.8	8583.18	8020.2	8733.72	8370.15	2542.03	6195.92	4498.1	4379.99	4553.41	5529.08
P62702	19045.5	11068.8	18341	19962.2	6665.73	4688.15	7387.03	4149.75	22099.5	14068.6	16861.8	23176	5090.72	9382.8	11057.7	3686.33	11535.7	11124.2	5583.49	28983.1	1151	1869.27	2141.1	1125.6	4731.88	6905.78	6732.18	6926.76	1389.37	820.444
P62715	1700.76	0	0	0	2242.07	2956.11	3500.08	3170.55	0	0	0	0	2975.18	2780.52	2606.6	3443.32	0	0	0	0	5005.5	5153.26	5372.59	3713.86	0	0	0	0	1946.87	2730.68
P62717	10723.8	10612.8	6040.78	10322.7	3737.19	1594.46	2597.66	2570.74	15512.3	9522.69	6943.96	7068.89	2621.68	4433.56	2334.27	2955.81	4388.81	6045.33	0	6493.07	839.81	755.228	661.067	1067.95	0	3299.36	2620.73	3357.39	652.019	468.73
P62743	0	12206.1	95643.2	13325.2	6481.68	8860.19	10991.8	5976.86	15040.1	18917.8	114233	8490.64	15886	7725	31107.2	5830.43	855.315	53190	15602.4	0	20216.4	23874.5	28564.9	161359	89004.4	10937.9	49630.8	9924.53	29569.9	17420.1
P62746	0	4631.23	7496.79	3150.4	14096.4	13815	18028.2	12128.5	7309.59	3578.77	6914.56	4577.76	8689.89	9499.59	8560.65	8951.84	4241.94	5409.82	0	5324.7	26499.6	28550.6	29334.1	22517.5	3324.39	3556.43	3209.94	4507.03	9510.71	11036.1
P62748	0	2046.69	0	0	6043.57	9814.85	17229.7	5584.37	0	0	1735.6	8084.02	7858.1	7378.03	4987	3893.91	3623.05	2758.82	0	0	3071.11	2202.79	2980.36	2435.38	0	0	0	0	997.281	1651.33
P62751	24935.9	0	12847.9	13814	3780.28	3144.91	1019.54	2658.73	21310.8	0	8221.91	0	841.126	11629.3	6105.84	1493.89	0	6725.58	0	0	0	1351.85	0	1226.86	0	0	0	0	0	0
P62754	37271.8	32170.4	25583.7	7385.78	6764.31	6276.66	8015.14	4303.51	32148.8	29954	13582.4	21851.8	7644.22	12450.7	4393.64	7460.09	17654.3	8063.36	18740	32845.9	1291.05	1776.69	899.422	1436.15	2220.58	7744.73	7637.98	7995	726.335	1383.19
P62761	15211.3	9481.33	15187.6	20361.6	81226.9	89312.1	145639	64541.3	11946.6	16006.9	16971.5	19974.4	55300.6	47947.4	73116.1	44572.2	6229.65	5857.22	6473.65	11700.9	50689.2	56365.3	71553.7	39069.1	3150.75	3444.25	3401.55	2305.86	21701.1	29009.6
P62774	0	910.116	3828.36	5768.97	1726.22	2032.48	2227.4	1334.24	1550.87	0	4460.75	5053.59	3173.44	3393.26	4579.35	1932.22	4423.91	2924.55	0	7364.52	2972.61	3985.68	5250.71	4235.83	1922.5	2406.46	2152.53	2907.88	2385.33	2574.21
P62806	77578.5	251058	207890	146570	30029.6	18039.3	31096.2	69450.6	180523	181356	76949.1	249844	41387.3	79738.7	375889	72306.3	184412	159445	198168	115247	11647.5	24241.8	14011.9	19332.4	384115	335432	296472	363971	39788.2	47629.2
P62812	0	0	0	0	12315.7	23381	36414.1	17768.3	0	0	0	0	2189.74	856.357	721.315	6782.25	0	0	0	0	1234.93	1116.2	975.299	828.374	3696.21	3491.56	1472.25	3254.31	1174.1	1480.03
P62814	8155.61	8159.56	6629.74	8124.32	10095.2	13013.6	11287.8	10707.1	13216.6	11752.7	8175.11	7252.38	11054.3	16024.4	8971.87	9983.05	7093.33	7219.97	27724.4	7516.42	40851.4	42360.5	39139.4	32132.3	6512.53	8028.7	8145.13	6783.55	23310	24247
P62821	7067.18	0	14168.3	2143.18	12491.3	13172.5	22525.5	12343.2	2488.26	2696.65	9041.04	5099.14	6530.32	6414.62	7137.52	8430.73	4696.17	2854.93	22746.3	0	16344.5	18696.7	20713.9	25232.7	6109.19	2166.83	4675.26	3525.87	11711.1	15867.2
P62823	8180.71	5279.91	5621.1	3777.53	3389.01	3176.23	3483.9	3623.76	4573.25	4094.98	7842.79	2870.95	5946.29	4996.03	5414.93	4296.85	10652.9	5114.47	6948.66	9125.28	28117.3	33231	35590.7	29533	8819.96	7598.38	11155.5	4490.44	21721.6	25692.7
P62827	6464.3	6727.37	30460	8531.04	9392.26	10785.8	17044.5	9820.44	8060.34	6115.92	12530.2	11596.1	10952.9	11104	18388	8277.13	9364.85	7322.23	23266.6	9996.24	20835.5	26151.7	26238.7	21075.7	4109.17	4908.65	5369.61	7407.93	11140.3	13852.2
P62830	18817.3	10550.8	26874.2	17732.9	3840.03	2827.05	2204.93	1983.77	23156	12399.3	16128.6	23035.4	3974.48	17063.1	8137.65	2642.98	6603.79	6259.28	11025.6	10798.2	941.705	1259.22	2107.21	992	1489.93	2217.97	1929.93	5360.22	576.768	508.752
P62835	0	3311.65	7457.93	3062.02	5227.59	7721.24	9391.16	6059.91	3434.57	0	6489.91	6217.01	6295.04	7261.63	9954.56	5285.23	0	6132.13	4411.68	0	7598.4	8719.19	10543.3	8356.18	4980.87	4096.83	4695.06	3929.44	5577.2	6212.8
P62849;P62849-2;P62849-3	26155.5	21052.9	13798.8	29371.8	9607.52	4370.34	6528.28	4265.72	35183.8	16223.7	17078.2	20706.2	6169.9	8196.75	3708.26	3163.48	10567.8	5646.43	14342.2	17081.3	826.368	1033.86	756.166	1405.17	2359.44	3887.43	4073.31	6197.09	669.052	375.867
P62852	29922.9	15954.8	15454.3	27008.8	8599.64	7233.48	11018.4	3636.67	20077	17836.7	24265.4	27114.7	6256	20114.8	13140.2	4414.5	8005.46	13415.4	6508.71	12262.5	1439.47	4451.92	2151.71	1278.41	2016.78	3829.19	1064.34	3393.91	511.487	262.836
P62855	31795.8	30345.1	18803.2	29091.1	6326.78	4759.05	4410.02	3712.53	55106.5	34190.4	38124.2	20719.9	4498.51	11100.4	7323.26	4716.74	15224.9	9754.08	38259.4	28008.5	1626.1	2263.92	1720.88	2107.8	4901.16	4462.08	4879.89	7189.34	1046.28	1465.76
P62862	18433.2	14930.3	7426.96	18268	5457.67	3655.14	778.081	1122.41	13831.2	8397.06	12332.2	12722	3216.96	6123.18	7688.01	1836.64	0	8578.52	0	0	416.207	1069.04	653.49	232.662	0	0	0	0	0	0
P62874	0	16725.9	0	0	10253.5	9139.28	12220.7	8949.06	16711.2	20585.5	8622.2	12348	6722.97	9022.59	6566.97	10346.2	18449.7	15099.7	0	0	12083.7	9166.22	9858.92	10059	12449.4	16385.4	13606.4	13809.7	11727.5	11573.9
P62878	0	0	0	0	2013.39	2770.26	4312.79	1578.48	0	0	4157.78	0	1913.11	1980.96	3050.74	1326.39	6638.81	2986.45	0	0	3066.87	3966.52	4965.89	5498.94	1345.21	0	1627.19	0	1374.61	1391.21
P62880	30422.5	28199.9	17788.8	26943.5	37105.4	34510.7	40777.8	32916.1	36171.6	38752	22446.6	21574.2	26013.7	25942.7	22510.4	31968.5	42857	41087.7	33644.9	35185.2	35671.2	36973.7	42791.6	28571.5	42519.2	55122.1	42558.4	46578	38921.8	41023
P62881-2	0	0	0	0	2280.98	1988.1	2323.32	2022.75	0	2425.41	0	0	1886.1	1481.37	1019.86	1965.77	0	1846.17	0	0	4446.14	4294.33	4483.23	3270.47	1347.7	1839.1	2075.48	1222	3562.02	4819.35
P62889	0	0	0	0	888.641	1810.74	8513.44	763.436	0	0	0	0	0	0	0	0	0	0	0	0	16603.9	0	0	14104.7	0	0	0	0	0	31364.7
P62897	98171.2	101197	71933.1	164669	42130.2	55816.1	58230	26007.8	112709	157389	112316	127297	61456.6	45948.9	17595.7	44753.4	89748.6	79632.6	121820	97739.9	26634	26880.7	16056.5	15790.4	132303	161946	139971	151997	44634.2	32906.2
P62900	20432.9	15995.2	14120.2	25670	7274.65	2980.42	4540.89	2835.27	29146.3	14681.6	15712.8	22109.5	4834.11	14428	5420.33	3104.65	6679.57	6412.58	7114.04	13816.2	581.594	1342.36	889.447	726.638	1636.37	2952.01	2116.26	5060.45	553.33	283.282
P62908	6843.23	12430.1	23515.2	8313.59	9199.58	8231.7	21042.1	7306.06	15312.7	8298.88	8587.4	11323.5	4525.2	5202.81	9591.57	3055.66	5789.89	3632.37	19095.3	13216.7	1863.32	2576.96	3347.93	15553.2	1828.37	1525.97	2505.77	14817.5	560.334	1172.53
P62911	23135.4	28331.8	15909	26180	3707.79	5372.21	4833.02	2427.17	19281.2	35575.1	20051.7	26938.4	10557.6	21777.7	16725.7	15236.4	32559.8	33649.9	29413.1	42500.7	4330.35	4883.25	3000.34	4033.44	7487.63	10947.7	6777.43	5711.18	1977.07	1966.44
P62918	38201.9	25536.7	17514	22899.7	9449.75	3790.82	6122.66	6022.96	49199.3	17185.8	16642.3	24036.8	7099.32	7301.17	4574.61	2456.52	8392.37	6538.75	16032.6	26576.5	3556.88	3490.83	880.7	1024.08	5757.63	12885.6	5532.51	9624.37	1173.87	1035.79
P62962	0	0	16835.2	0	11463.2	13010.6	17541.2	11470.9	5901.27	1743.47	17450.9	9090.07	14339	13199.8	25514	9048.24	3787.64	15028	22644.6	0	27949.7	37823.1	47528.7	45808.9	12166.7	3289.85	10683.2	3270.37	14554.1	15765.1
P62996;P62996-2	0	0	0	0	0	0	0	0	0	0	0	0	0	0	0	0	0	0	3685.84	0	0	0	0	0	0	0	0	0	0	0
P63001	9654.72	0	18105	0	6461.91	7528.17	7921.46	6599.18	0	9682.71	17473.7	0	7120.99	9984.28	9479	5584.93	0	8060.54	7246.64	0	13399.6	11899.3	19930.2	18208.2	10594.6	8981.13	8986.28	7321.01	7199.88	7856.38
P63005	6110.46	2933.89	6911.94	5036	5504.04	6936.5	7262.12	5197.67	4364.75	5195.25	3947.38	3801.53	6364.26	5695.68	4906.03	5701.38	6277.38	4981.12	19498.5	6078.95	9262.03	8038.5	8609.48	6888.15	3419.73	4583.88	3679.68	5510.78	5191.02	6719.32
P63011	14496.3	11276.3	22239.3	11224	22669.2	24197.2	24572	18029.9	16995.8	19223.5	25491.4	9342.07	23696.3	34382.3	35620.3	20426	17022.4	21500.3	10941.1	14425.2	89160.9	107030	103301	91162.5	26302.7	25453.4	26047.7	24643.3	59836.2	50355.6
P63017	24248.5	22334.9	33929.9	25932.7	61186.5	79506	77041.3	61943.4	25203.6	22250.3	23781.8	32067.7	47556.2	38670.1	31341.4	42876.3	22435.7	19447.2	29765.5	25438.3	70704.1	78655.5	70880.4	59583.3	13082.3	16399.7	14493	24488.6	37159.9	41552.2
P63028	0	0	0	0	4123.99	7094.69	8053.63	3489.56	0	0	0	6699.24	6684.15	5903.47	6626.04	3743.66	0	1498.75	0	0	9265.35	9419.02	11492.5	7277.49	0	0	0	0	3116.96	3844.67
P63030	17014.3	9883.51	11690.5	12802	9981	8277.02	13212.8	22029.8	6217.9	5437.7	9887.47	10578	1006.86	6925.62	6026.35	2619.89	7497.72	5441.64	92608.4	0	2298.25	5108.7	5983.96	5889.55	5676.23	11775.9	5182.22	4308.88	2518.51	2335.36
P63037	0	0	1086.96	0	7602.58	8289.64	10564	7466.28	0	0	0	0	4799.01	4497.13	5105.42	4756.67	0	7560.31	0	0	4285.98	4666.04	5104.92	4251.86	2998.12	0	1638.46	4057.62	1836.69	2299.45
P63038	7726.15	11413.6	14185.7	13857.9	2788.25	3577.78	2925.79	2141.59	9800.72	12727.1	11730.4	15603.1	5128	6023.89	5305.05	4445.03	9958.11	10117	16077.2	12786.6	2164.03	1926.15	2050.15	3001.19	15113.8	18496.1	16194.2	16135.8	5687.22	4466.12
P63040	0	0	0	1725.84	19904.8	11622.8	14623.2	6613.45	0	0	0	3399.32	16875.2	20961.4	17128.3	6941.19	0	0	0	0	33567.5	40033.2	59147.5	35715.8	2006.31	1797.03	2115.6	0	18104.5	15635.4
P63044	0	0	17292.9	2961.84	3806.26	7402.55	5603.45	3443.92	0	0	13705.3	11584	7506.18	6786.79	6507.95	5906.3	21736.5	9668.29	0	8023.12	25647.3	34141.2	33735.7	24484.4	18969.6	9861.18	12590.7	11405.8	21171.4	17354.8
P63046	0	0	0	0	4934.43	5130.11	5640.25	4579.84	0	0	0	0	2555.24	1728.23	2296.33	2564.31	0	0	0	0	3573.41	3822.02	4014.91	2951.93	0	0	0	0	2705.84	3210.13
P63073	0	0	4004.14	0	1127.72	1239.83	1500.12	1628.51	0	0	0	0	729.343	483.671	1392.7	793.398	0	0	6849.38	0	1370.33	1295.41	1250.91	1097.28	541.733	0	580.07	655.679	833.028	900.35
P63080	0	0	0	0	4294.75	3064.67	9230.27	4256.44	0	0	0	0	1101.81	0	0	2525.23	0	0	0	0	1411.17	1311.94	2252.36	1495.1	0	2811.22	2278.88	7615.44	1034.23	1108.14
P63082	0	0	25790.2	0	2824.72	0	7581.53	0	0	0	87378.7	0	5525.17	13484.1	7166.21	4795.01	0	28404.2	0	0	2669.19	4057.24	2766.12	14811.3	14616	4932.69	15421.8	29937.1	9791.86	3227.82
P63085	0	3083.13	0	2416.25	14047	18590.1	20165.3	13923.3	5239.92	4558.54	3937.76	1411.18	14101.3	11897.8	14194	12177.7	4333.23	5646.87	3552.61	0	21644.4	26027	29432.1	18615.7	3395.15	4242.78	4546.38	3386.27	8647.17	11224.8
P63087;P63087-2	0	0	0	0	5741.03	5389.41	6993.22	4852.95	0	0	0	0	2603.39	2379.7	2964.3	2722.25	0	3261.95	0	0	3982.83	3904.4	3768.49	3647.87	2506.72	3511.86	1953.07	3473.67	1825.23	2250.68
P63094;P63094-3;Q6R0H7	5665.7	0	4286.79	0	12377.5	14571.3	20286.8	14256.3	0	0	0	0	6249.42	3648.17	6101.22	8058.81	5646.11	4473.3	0	0	4727.74	4822.23	4950.16	4224	3090.88	3224.98	2821.3	3087.49	2749.07	3119.36
P63101	40979.5	44672.2	42552.7	46190.7	89439.6	107883	124448	79572.1	37620	36210.9	35369.1	48931.5	59417	52534.6	56053.8	67889.2	49669.4	51951	52103.1	52576.6	99930.3	94796.5	122796	69122.4	28905.4	32847.1	32011.3	26909.2	52235.3	70477.6
P63137-2	0	0	0	5679.99	5694.86	5459.42	18532.1	5942.75	10475.7	6533.51	5045.64	0	1777.17	4313.11	3129.79	2583.5	0	0	0	0	1115.28	978.869	1104.74	933.985	2989.71	5526.27	3839.19	3581.57	874.869	1366.2
P63141	8400.47	10101.5	5385.33	11386.1	6892.05	10387.4	8165.19	6539.83	9772.63	8191.64	6038.52	5735.94	7711.41	7865.35	6357.48	6379.81	6921.17	4351.1	28847	8998.15	16722.8	16502.1	18189.3	14156.7	9070.57	9560.89	8554.13	9595.02	9382.87	10339.1
P63158	0	0	0	0	0	542.28	581.788	395.959	0	0	0	10143	3807.91	2963.14	2951.67	699.624	0	4594.7	0	0	0	124.669	263.925	210.014	0	0	0	0	0	0
P63168	11561.9	5127.23	13485.7	4290.76	9708.54	10049.9	16457.1	9284.49	6620.23	5637.33	17301.9	8655.08	7552.95	9161.15	12554.4	6123.79	9457.02	13068.8	15927.8	15577.8	11612.9	14378.4	16360.9	19247.1	8682.15	6073.17	7264.04	8897.4	7326.78	7588.3
P63213	0	8788.46	21222.7	0	2631.59	4204.11	2054.56	0	0	0	39564.1	0	6047.58	0	0	1776.15	0	6335.15	0	0	1325.12	1646.07	2329.88	3367.59	13679.8	6997.6	12791.8	4140.21	2021.63	1383.97
P63216	0	0	4614.76	0	8175.76	7771.5	11745.9	7421.87	0	0	6496.15	0	4771.91	4072.24	5189.38	5328.26	0	2110.7	0	2497.19	5080.66	5847.15	6393.5	6290.37	3427.76	3336.8	3722.01	3702.77	4504.67	5190.23
P63242	2988.14	2986.52	11750.6	3061.07	6008.21	6615.88	8306.32	5099.69	4444.13	3759.92	3832.23	8532.13	8376.8	6052.81	7817.04	3937.74	4541.81	3473.41	11899.6	5546.73	5574.11	5977.03	7062.67	4136.59	1074.58	1662.35	1385.07	2835.54	2128.15	2633.26
P63254	0	0	0	0	0	0	0	0	0	0	0	0	908.938	0	1123.47	0	0	0	0	719.17	37.3043	0	0	0	0	0	0	0	0	1
P63260	135617	126505	229697	112471	273092	287942	302558	240057	141682	118875	142432	214288	234892	199391	268650	193148	136439	146038	394076	202816	382398	385221	405660	355620	87075	102418	94810.6	151338	167203	190700
P63276	0	0	6277.05	0	2650.53	1887.4	5485.16	1905.95	0	0	3665.62	0	0	0	3239.22	1653.53	0	0	0	0	1192.21	1090.37	1260.16	1141.76	0	0	0	0	2334.58	1147.18
P63300	0	0	0	0	0	0	0	0	0	0	0	0	0	0	0	0	0	0	0	0	269.215	352.453	281.805	402.843	0	572.909	0	0	396.98	279.403
P63318	11947	5495.4	138157	5340.59	3365.78	2705.57	4068.55	1766.92	5892.76	8463.25	5396.52	103624	2971.95	8027.96	12103.9	12212.7	4144.25	32740.1	0	402347	3961.68	3978.51	5335.4	6415.97	32538.1	14274.9	11525.6	10278.6	2034.55	3209.22
P63321	4167.34	0	2260.95	0	4965.01	8243.9	12717.4	6261.36	0	0	1034.32	2303.51	3867.49	3211.77	4831.39	5424.61	0	0	9660.94	0	8559.61	11249.8	12715.9	9007.67	1095.43	2199.9	1770.44	0	3494.58	4938.6
P63323	0	0	22937.4	0	2886.82	1785.5	7910.34	2483.98	0	0	0	20709.3	3569.03	5513.07	4906.36	2041.73	0	3995.45	4782.67	5615.06	652.408	945.471	502.106	1118.57	1317.52	1332.19	859.535	5654.16	365.316	285.605
P63325	16223.4	0	8613.15	15508.9	14162.2	9125.8	36336.8	7661.19	22385.7	12708.3	10721	29184.9	5133.73	16513.2	10921.1	3471.76	14014.7	7741.02	8531.52	0	719.361	1037.13	1437.33	544.728	6590.92	8222.66	8490.85	7585.99	1002.29	1272.11
P63328	38138.2	31482.4	23825.5	28050.9	32000.5	38210.6	39998.4	30347.8	40002.4	43009	28399.1	28144.1	22167.9	20150.2	21216.7	26751.6	58932.3	55613.4	66040.9	46601.8	41849	38873.6	43050.1	32648.6	39756.4	37631.7	39448.2	41957.6	23710.7	25970
P63330	0	0	6104.62	1729.62	13291.4	14862	18721.7	12731.8	0	6786.57	3599.79	9409.37	12239.8	10912.9	14777.3	11705.3	7409.42	7520.69	14289.4	0	25195.3	24477.4	27166.9	23208.2	1822.3	1597.65	4248.61	4365.76	8860.8	10339.8
P67778	955.067	1095.28	7948.41	954.741	2442.23	3530.29	6783.46	2652.36	0	0	11313.8	2492.23	2388.35	1732.14	7903.2	1481.77	0	3325.73	30028	0	1116.2	1187.05	1459.53	6353.34	7558.54	4000.99	9183	6177.59	4961.8	2449.94
P67871	0	0	0	0	3822.82	4703.61	5883.65	2623.53	0	0	0	0	2519.57	2627.86	2688.7	410.683	0	0	0	0	3650.79	4387.23	5625.85	3154.63	0	0	0	0	1966.62	2151.51
P67984	10684.6	0	20512.1	8908.96	0	2529.45	7289.79	1442.61	11421.4	7375.17	11368.6	19573.2	4333.07	24946.5	9177.12	2646.62	0	6236.1	54032	12093.3	1611.18	1568.87	2541.33	2292.82	0	0	0	13109.2	0	0
P68033	38525.5	34268.3	89524.4	33369.4	64880.2	80688.2	54740.4	73790.3	31942	81920.5	37519.5	36317.2	42597.5	34824.9	82954.5	48214.7	42056.9	30248.9	164333	69404.4	131134	93158.8	136568	103441	23703.3	35521.2	30411.2	44434.1	53853	69616.3
P68037	0	0	0	0	1826.22	1891.54	2394.93	1953.8	0	0	0	0	3168.48	3361.73	3395.67	1637.88	0	0	0	0	2577.3	3084.57	3150.44	2166.22	3620.48	9235.84	0	5743.33	3461.66	3534.31
P68040	10546.6	0	9833.36	0	6032.75	6185.11	15353.2	6786.02	40190.8	0	10179.7	10492.4	2171.6	13764.9	4014.13	2781.45	5111.06	18389.4	23994.9	7026.42	1325.02	2845.26	1842.03	1017.67	23678.8	1998.24	8484.25	10507.1	2142.01	1307.59
P68181;P68181-2;P68181-3;P68181-4	0	0	5818.71	6549.74	11342.4	13304.1	20421.6	10447.5	0	6385.67	5555.93	6673.27	6091.83	4608.63	5749.86	5277.66	5586.73	5110.32	0	0	13521.6	15705.7	16997.8	12709.8	3892.72	2775.42	3702.6	3465.97	5565.48	7534.06
P68254;P68254-2	14218.9	15563.6	25760.2	16686.6	27357.3	30408.4	34795.6	22098.5	14745.5	17362.7	16664	25055.9	24846.5	17546.1	24740.3	21362.6	22236	21603.4	39887.8	14841.1	24519.7	28637.1	27213.4	21929.3	9983.42	14687.1	14874.7	18454.9	17607.7	19990
P68368	70732.8	74082.9	78637.2	82747.2	452264	504460	502371	499627	93485	94524.2	73393.6	89103.2	279518	210389	245978	325744	95115.4	83032.5	217271	107575	197913	245616	267554	177080	46813	54050.3	50045.4	67377.7	110682	137320
P68372	71776.9	74729	85455	88552	399107	369691	435069	437590	94642.6	88235.8	61924.3	82672	240921	181540	197167	302912	53296.2	50929	164652	56725.4	153164	187008	167969	145158	37023.9	43303.3	39177.4	55971.9	133786	175698
P68404-2	8768.17	10956.5	6425.81	7401.19	11122	10304.6	10601.8	10207.6	11455.9	14521.5	7356.57	7661.83	9050.38	7952.96	5263.84	11004.5	21675.8	19097	9051.37	14716.6	16783.4	13975	14096.1	12992.1	9080.56	10251	9150.37	9857.49	8305.96	8560.8
P68510	0	0	8519.82	0	38045.5	47103.5	56022.3	32870.1	0	4062.48	7529.33	12293.7	19743.4	13341.4	20860.3	17179.3	1283.18	4926.1	12403.7	0	13580.3	16031.6	17267.3	12059.8	2011.04	5465.25	3476.9	6477.58	8950.48	10475.5
P69566	0	0	0	0	2828.64	0	1636.59	1860.08	0	0	0	0	0	0	0	1242.43	0	0	0	0	1542.57	1742.53	1636.71	1119.76	0	0	0	0	1017.61	686.123
P70124	13910.9	0	20306.6	1248.94	1305.63	0	4610.08	1623.88	0	0	0	9109.08	0	0	5198.94	0	7392.8	3739.62	41147.9	0	0	479.707	457.755	441.785	1109.56	2387.94	0	13254.7	373.456	360.929
P70168	73106	61388.2	81184.1	29348.5	11278	16033.8	14396.2	14607	30817.9	39153.2	37062.5	55747.1	11473.5	13017	19735	10543.8	246678	35165.9	377846	103914	6845.8	5074.46	17008.7	4067.91	13860.1	31262.7	2753.44	3694.14	5576.57	4655.38
P70175	0	0	2271.86	0	9827.91	10799.6	9305.14	9572.04	0	0	1724.66	2191.67	3075.23	2777.37	2986.48	4362.93	6891.82	2323.74	20580.9	0	5404.93	5828.41	6117.4	5865.22	2115.45	1709.68	2242.96	1883.3	2603.12	2784.25
P70188;P70188-2	0	0	0	0	2368.37	2204.65	2065.99	2900.13	0	0	0	0	1364.29	1979.02	612.805	1734.55	0	0	0	0	2160.56	1989.73	1865.07	1916.33	0	0	0	0	822.834	928.143
P70195	20269.4	9664.94	15761.1	9416.25	4453.56	4269.67	5601.2	2629.35	7144.97	6299.13	11779.8	13711	3353.21	9574.39	8606.91	4944.49	17837.9	12603	59005	24404.1	2600.22	3493.52	3946.6	5794.35	6673.53	8615.71	8082.21	10951.8	2322.29	2826.79
P70206	0	0	0	0	0	697.679	994.538	1068.3	0	0	0	0	0	0	0	563.761	0	0	0	0	909.739	1192.06	892.433	862.848	0	874.883	0	0	700.809	1086.95
P70211;P70211-2;P70211-3	0	0	0	0	0	279.268	992.998	454.293	0	0	0	0	549.153	0	0	416.483	0	0	0	0	1463.33	1595.58	1732.22	1153.18	0	0	0	0	818.423	978.737
P70232	0	0	0	0	1092.44	561.332	4096.22	1102.82	0	0	0	0	722.82	0	0	924.893	0	0	0	0	859.789	1337.07	1203.87	702.834	0	0	0	0	587.626	753.725
P70236	0	0	0	0	0	0	126.514	0	0	0	0	0	0	0	0	0	0	0	0	0	1208.07	1532.51	1760.84	837.016	0	0	0	0	8553.85	1707.28
P70245	0	0	7905.45	0	0	0	0	0	0	0	7464.88	0	0	0	0	0	0	0	0	0	239.138	460.47	341.338	7599.26	3808.97	0	2877.41	0	639.272	0
P70265	0	0	0	0	0	1485.95	1246.42	1409	0	0	0	0	0	0	0	818.664	0	0	0	0	1920.73	1762.24	1680.9	1421.32	0	0	0	0	1075.99	1220.49
P70268;P70268-2	0	0	0	0	0	0	0	0	0	0	0	0	0	0	0	0	0	0	0	0	184.633	351.012	218.011	120.425	0	0	0	0	77.3755	130.941
P70280	0	0	5011.73	0	1461.17	1447.09	2321.41	4566.41	0	0	5307.87	0	1538.66	1309.19	1960.97	1078.09	0	0	4999.32	0	1840.33	2181.03	2272.34	2766.45	1218.77	0	820.771	0	2146.41	2125.87
P70290	0	0	0	0	1858.85	4526.83	4136.04	2886.94	0	0	0	0	4403.37	4185.76	3739.63	3639.14	0	0	0	0	6106.66	5954.96	7432.01	5184.77	0	0	0	0	2664.58	3055.26
P70296	10671.7	10166.3	8292.4	11515.3	9899.89	13776.6	15219.8	7435.96	9861.7	11150.9	11259.9	19982.8	16601.7	17073.4	16498.1	9923.86	15666.1	14151.7	15878.2	19122	28514.7	35824.7	45504.1	24173.4	5989.27	9055.86	6128.56	9222.24	15185.6	17275.5
P70297	0	0	0	0	8578.67	9719.32	8085.64	7727.27	0	0	0	0	5478.48	6097.93	4662.11	4744.89	0	0	0	0	16651.1	15666	17509.7	13075.6	0	0	0	0	4991.79	6021.19
P70302	0	0	0	0	649.676	942.255	741.57	1231.22	0	0	0	0	0	0	0	772.973	0	0	0	0	543.001	430.289	939.62	508.674	6466.09	7847.14	5871.69	7417.01	1725.14	1602.54
P70303;P70303-2;P70303-3	0	0	0	0	1940.89	1986.23	2047.31	2575.26	0	0	0	0	1172.99	0	0	1709.28	0	0	0	0	2093.62	2099.64	2053.43	1637.42	0	3076.1	0	0	926.316	1393.27
P70318	0	0	0	0	13064.5	5170.06	9059.9	6619.12	0	0	0	0	2234.57	0	11015.5	9873.1	0	0	0	0	2401.02	4757.04	2682.99	2036.44	0	0	0	0	3914.47	2002.38
P70333	0	0	0	0	5175.19	2771.94	6600.57	3393.91	0	0	0	0	2027.25	0	0	1072.8	0	0	14176.9	0	880.95	1030.86	1189.09	981.25	0	0	0	0	472.771	445.055
P70336;P70336-2	0	0	0	0	1950.5	1784.58	1517.23	2557.75	0	0	0	0	1323.22	1342.45	1196.38	1904.28	0	1537.07	1972.19	0	2863.83	2467.92	2256.73	2196.02	1916.25	2032.67	1793.08	2461.63	2053.72	2410.9
P70349	0	0	7513.71	0	4602.52	8213.21	8405.35	4346.33	0	0	8631.94	11099.1	11232.6	10566.9	10228.2	4886.56	0	7017.79	0	0	19244.5	19528.2	21856.3	17987.8	0	0	3815.5	2807.89	8272.53	9837.37
P70372	0	0	0	0	3740.55	2600.66	6683.34	2791.86	0	0	0	0	0	0	2586.64	1616.3	0	0	0	0	667.788	722.944	990.554	671.651	0	0	845.002	0	0	660.719
P70392	0	0	0	0	2083.31	1279.02	1929.26	2219.03	0	0	0	0	1136.2	1122.71	730.734	1764.93	0	0	0	0	3109.69	2820.25	2321.23	2027.58	0	0	0	0	2076.07	2762.55
P70398	8292.07	25268.7	4271.88	7722.31	11061.9	7608.19	5923.23	14702.8	8098.95	1959.49	0	0	6748.76	6176.17	6697.22	8458.54	0	4946.4	1074.83	0	14432.3	13639	9855.72	8257.39	4050.51	6200.13	5575.82	3906.17	5364.83	6393.44
P70399;P70399-5	0	0	0	0	1045.72	0	1347.26	1097.73	0	0	0	0	0	0	0	629.359	0	0	0	0	0	0	0	200.936	0	0	0	0	0	0
P70404	24411.5	12609.8	50250.4	14106.3	4452.37	4641.65	3675.15	4703.69	17613.1	12771	200723	1614.03	226303	118056	98165.1	13221.7	43644.6	33875.5	64395.8	0	2423.53	2747.02	3037.68	2567.02	9187.17	13881.3	11363.7	19738.7	3916.32	3574.26
P70414	4637.17	6304.79	0	0	7261.72	7022.4	6643.24	7537.17	6019.23	7375.88	6441.79	3856.94	5883.69	4922.05	5133.41	4503.89	0	0	0	0	8247.03	7817.17	8068	6470.91	5658.05	4273.98	5236.85	6139.32	5666.76	7062.96
P70425	0	0	0	0	3571.77	2917.27	3735.45	2989.59	0	0	0	0	1249.33	0	1535.39	1528.81	0	0	0	0	1324.99	1377.25	1954.74	1088.18	0	0	0	0	628.086	831.168
P70429;P70429-2	0	0	0	0	0	287.319	613.404	345.985	0	0	0	0	578.359	0	0	446.99	0	0	0	0	993.621	970.669	1311.05	932.6	0	0	0	0	454.595	744.295
P70441	0	0	0	0	0	0	0	0	0	0	0	0	1658.82	0	4691.9	553.324	0	0	0	0	449.057	486.494	542.453	0	1458.44	1851.5	1581.96	2010.85	510.13	740.089
P70445	0	0	0	0	0	493.787	275.653	0	0	0	0	0	0	0	854.117	0	0	0	0	0	1073.52	679.336	796.177	422.431	0	0	0	0	603.052	324.77
P70663	2639.88	2541.7	0	5293.79	3476.17	3658.44	3911.71	2313.36	0	0	0	5966.04	1624.46	1156.59	1265.04	1490.61	0	0	0	0	398.76	319.981	579.012	390.099	27548.3	41600.2	34966.1	26694.6	2989.56	6213.54
P70670;Q60817	0	0	3907.54	1988.29	798.593	397.687	769.693	367.941	2653.85	0	2713.67	3911.4	822.49	1390.56	1769.47	0	0	793.242	11947.6	0	189.494	290.93	319.345	270.378	0	0	0	2552.18	0	0
P70671	0	0	0	0	0	433.428	506.206	0	0	0	0	0	0	0	0	229.824	0	0	0	0	959.662	745.148	888.788	728.579	0	0	0	0	0	393.562
P70677	0	0	0	0	0	0	0	0	0	0	0	0	0	0	0	0	0	0	0	0	286.755	0	0	242.449	0	0	0	0	152.898	0
P70689	0	0	1732.99	0	0	306.176	0	0	0	0	0	0	0	0	607.118	0	0	0	0	0	533.915	483.161	404.119	687.902	0	0	0	0	454.943	315.815
P70694	32557	4801.75	13557.1	6698.69	13911.1	16304.5	9113.53	10142.8	0	0	25433.3	19715.6	6257.88	4159.23	38353.2	3910.91	149735	5409.51	45216.2	0	11222.9	11092.3	21688.7	6971.42	6038.8	5900.82	5197.63	25143.8	4045.25	10700.3
P70704;P70704-3	72369.6	59516.2	41342.3	51816.4	24396.6	17077.5	18243.4	12624.6	99898.8	51676.8	39005.3	64173.5	22847.2	18735.7	34287.6	14477.6	32928.8	20294.3	110814	221411	10146.1	10229.6	8685.23	7739.02	19558.8	24617	20833.8	22377.5	9810.34	9061.25
P80313	4149.19	7392.28	9788.32	7724.65	4803.38	10202.1	9487.57	10369.2	10450.2	7986.94	4072.23	7266.42	7996.45	6650.77	7631.43	6117.07	8157.75	3974.12	10122.4	0	6320.62	7647.88	6317.07	5261.13	1973.37	1476.85	1182.26	3724.26	3716.21	4587.37
P80314	2929.57	3094.95	14105.3	3159.2	6135.46	8520.22	12897	6035.02	4270.21	3595.49	8445.47	0	6987.04	3334.23	10954	2916.68	3008.36	5144.06	6541.84	0	3794.75	7079.18	4858.05	8141.63	1036.63	2758.32	2228.74	1782.86	4668.31	5060.87
P80315	14671.9	13275.9	15634	10071.7	9181.94	7731.83	10478.6	12887.1	34306.5	11031.8	8184.4	10073.6	6631.88	12210.8	27063.8	4999.96	20545.7	25383.7	91771.5	145088	2686.85	3547.27	4819.56	4159.69	15665.8	8712.34	4337.86	13396.2	3847.31	4127.73
P80316	2585.55	2056.58	9355.69	3343.36	7844.05	8214.41	14461.7	9628.08	0	2523.68	2254.7	2964.87	4627.54	3376.25	5415.66	4232.36	2429.03	1077.95	8575.39	0	4522.17	5224.08	4802.06	4234.66	0	0	796.299	1611.19	4862.54	5873.56
P80317	1568.83	1950.84	8904.25	3569.2	6107.64	6276.3	10408.9	7657.98	2834.67	3115.34	5176.65	2670.62	3592.96	4736.65	4088.1	3578.52	2082.69	1823.22	4611.03	2953.92	3597.19	4511.18	3941.52	3860.34	1178.89	1474.71	1350.78	1105.31	4217.04	5040.75
P80318	4084.01	4076.35	10295.6	4745.69	7402.69	6155.96	9428.39	8350.82	5661.02	4843.21	3981.15	4893.54	4319.86	3487.17	4958.43	3721.84	2545.83	3369.77	4483.1	0	3817.95	3927.86	3694.18	3294.59	1679.95	1826.68	2067.82	2256.38	4166.98	4728.89
P80560	0	0	0	0	0	676.302	1047.74	1079.01	0	0	0	0	1876.11	2249.17	0	1522.53	0	0	3684.39	0	4458.2	3886.66	3673.95	3118.04	1898.85	455.762	464.136	0	2141.38	3060.38
P81117	0	0	0	2227.79	0	1559.98	0	133.667	0	0	0	3612.89	975.729	836.925	640.779	679.989	0	0	0	0	0	510.082	155.428	0	6461.86	9645.3	6817.66	7902.75	1842.81	1384.36
P83741;P83741-2;P83741-3;P83741-4;P83741-5	0	0	0	0	0	1676.78	668.549	1522.04	0	0	0	0	1822.91	1562.48	1163.46	2044.27	0	0	0	0	3271.19	2742.53	3127.02	2638.07	0	0	0	0	1326.42	1605.88
P84075	4950.15	4791.22	4436.12	4381.97	10219.6	15195.9	23673.1	8425.25	7245.51	4067.22	4558.34	9306.77	8832.23	6920.91	9071.65	5321.95	6329.65	6422.93	4025.29	9668.14	5167.75	5440.88	6714.7	4307.36	3107.93	4591.07	3898.36	4379.13	2060.8	2782.94
P84084	16453.9	14781.1	33752.7	14415.3	22499.2	25223.1	37795.7	17543.7	21936.8	16863.1	31984.4	24813.7	23742.7	19468.2	46479.3	18134.9	25608.7	23368	26583	28937.5	42706.4	48997.3	64096.8	59307.6	29490.9	13592.5	13025.9	12238	24959.4	20322.2
P84086	16360	31755.6	22255.2	11111.2	33979.1	28033.8	39135	25283.6	32968.6	20431.4	18778.4	15270.3	33374	41667.7	42790.5	26452.9	25179.5	22747.5	29264.7	38908.1	177260	212154	309617	150713	8536.23	7404.79	17944.7	24813.9	81306.9	73798
P84089	0	0	0	0	2788.96	2740.32	8692.49	2651.14	0	0	0	30360.1	8919.98	5861.72	7418.1	1008.92	0	4517.13	0	0	0	0	167.748	0	0	0	0	0	0	0
P84091	15885	12599.3	13785	141851	24195.1	23985.1	23870.9	19955.4	17345	18138.1	13850.2	13611.4	14651.3	16064.2	13372.3	14616	25448.4	14430	13360.5	28782.1	34569.9	34687.5	32046	28808.2	18024.6	17488.3	17204	15302.9	23695	26490.2
P84096	7625.56	9427.26	12382.6	9130.02	4143.63	6855.74	5472.73	3815.25	14212.2	7389.54	11880.7	8172.74	6182.71	5621.86	6119.45	2544.46	5238.04	4270.05	2777.17	0	2436.62	2650.64	3123.89	3304.73	2697.61	2295.71	3074.95	3079.21	1446.85	1396.59
P84099	46222.3	71234.2	37026.4	49520.7	11181.1	10516.3	8466.72	5415.3	52715.8	68285	34891.9	46563	17054.6	32281.3	25998.1	16674.4	49069	48847.7	30742.7	74501.2	6932.59	5239.06	5145.82	6264.3	11421.4	18142	14416.6	12993.6	4177.5	3698.49
P84104;P84104-2	0	0	0	0	2282.52	1652.33	4772.46	1764.15	0	0	0	8037.25	2074.43	2241.75	3773.59	942.309	0	2730.08	0	0	499.764	655.675	525.801	587.228	0	0	0	1372.67	0	0
P84309	10659.5	14167.2	0	0	3559.78	2491.18	2304.19	3566.4	5656.17	16514.2	0	0	2787.83	3099.32	3205.53	4716.07	13089.9	10694.3	11853	15271.7	23907	18847.4	14911.7	21561.3	16026.7	11460.1	11293.1	12001.1	12010.4	10575.9
P97300	0	0	0	0	3391.13	1414.03	5209.55	1762.07	0	0	0	0	2478.09	1264.53	0	1440.62	0	2225.78	0	0	3822.74	2513.19	2766.5	2983.16	5587.15	2700.8	4594.95	5476.27	3096.05	2840.25
P97315	0	13788.2	5113.19	15781.9	3088.76	7083.96	6543.76	2965.06	13174.2	8396.75	5912.78	10556.6	4675.39	5992.21	4219.14	4208.89	4345.14	3914.55	0	7598.39	2651.51	1999.54	2866.22	2064.63	3029.16	3661.95	3513.66	3089.18	1597.93	1726.71
P97318;P97318-2;P97318-3;P97318-4;P97318-5;P97318-6;P97318-8	0	0	0	0	0	1076.34	1405.11	1198.28	0	0	0	0	0	0	0	568.122	0	0	0	0	2571.58	2477.78	3278.8	1938.59	0	0	0	0	577.033	942.057
P97350	317364	158826	87691.8	161530	30823.9	24227.1	32196.8	35564.3	293335	365003	183916	199515	135957	117744	46601.7	88740.6	385929	299857	372860	305064	26284.2	18966.9	17654.6	16178.3	175680	183475	105852	187264	27715.8	18443.7
P97351	23294.4	9300.23	17993.6	16428.4	21986.1	18067.7	51808.8	15209.7	18945	13009.2	14874.8	21626.5	7771.29	23855.3	19967.5	5218.17	0	8182.08	11468.9	10124.4	2259.13	2482.2	2785.13	1559.56	1166.75	3265.91	6124.77	4713.04	432.307	794.953
P97355	0	0	0	0	779.008	7016.29	0	1002.45	0	0	0	0	947.569	0	16049	694.812	0	0	0	0	1356.62	1124.08	1244.03	1232.07	0	0	0	0	429.96	581.953
P97370	0	1598.74	0	3057.97	3461.83	2019.43	16419	4566.1	0	0	0	0	1498.24	1397.35	1757.81	1094.12	0	895.409	0	0	772.56	587.111	565.522	775.503	1468.46	1719.18	2098.91	0	773.088	785.396
P97371	26761	14241.6	7590.54	17747.8	12964.4	12519.4	22166.3	9460.54	33720.2	11186.5	16701.9	12077.9	13340	10127.8	16562.8	5869.99	0	2942.21	13678.8	0	10083.3	14915.5	20043.2	9736.86	3227.17	0	3334.72	6634.31	3715.15	4865.25
P97372	0	0	0	0	3208.06	3581.84	6135.36	2607.42	0	0	0	0	2688.33	2086.08	3958.64	1523.22	0	0	0	0	3614.77	4767.25	6745.8	2583.03	0	0	0	0	1301.74	1870.47
P97379	0	0	4258.85	0	16195.3	13551.9	43893.4	13251.6	0	0	0	0	4521.52	3139.5	10685.9	2059.02	0	0	0	0	717.589	902.945	1141.77	556.951	0	0	0	0	244.484	408.484
P97390	0	0	0	0	1418.74	1414.74	1453.89	1564.57	0	0	0	0	0	0	0	539.789	0	0	0	0	698.043	589.622	671.597	490.507	0	0	0	0	560.924	686.079
P97393	0	0	0	0	957.397	920.079	651.292	1185.83	0	0	0	0	900.308	574.213	544.007	665.025	0	0	0	0	1444.57	1145.21	1124.21	1092.58	0	0	237.264	0	536.877	737.866
P97411	18674.4	840208	7104.75	0	3215.25	3156.1	2973.37	2968.82	0	0	773921	6981.18	3020.74	3372.37	3492.48	3552.6	0	3668.69	150525	0	5844.62	7146.36	7174.94	5532.37	1546.16	3436.79	0	3550.41	2715.03	3010.1
P97412;P97412-2	0	0	0	0	0	0	0	237.505	0	0	0	0	0	0	0	165.771	0	0	0	0	730.287	639.56	544.649	580.318	0	0	0	0	573.896	637.224
P97427	34006.7	42773	26131.7	22956	58508.1	78951.6	81194.6	54959.1	47583	48785.8	33450.2	25592.3	82704.7	91510.3	72076.5	74670.4	45313.6	25472.4	33117.7	48939.9	114399	118141	126454	80659.4	21811.5	28711.5	16186.9	23379.4	43207.2	60040.7
P97441	0	0	0	0	0	0	0	419.726	0	0	0	0	0	0	0	579.907	0	0	0	0	3427.42	2770.13	3119.78	6834.32	6531.69	5830.8	6717.9	5949.11	2972.49	2615.12
P97445	0	0	0	0	859.579	511.499	0	790.173	0	0	0	0	0	0	0	959.097	0	0	0	0	5673.14	4473.69	4029.44	4290.23	0	1801.63	1929.51	0	2595.32	3156.18
P97447	7676.28	24054.9	10063.2	8505.93	3800.74	5004.56	5261.91	4226.82	30494.9	19368.4	28752.2	88965.7	17623.9	16272.9	10962.7	6230.97	14424.9	12131.8	8449.27	36936	14105.1	14179.2	15943.1	11955.3	9877.05	8051.27	17349.5	13232.9	6130.59	6936.15
P97450	220844	48531.6	85782.6	119456	66400.1	46652.5	35807.6	44501.6	113374	87765	70517.4	199667	100095	89886.2	66239.6	51687.6	66095	84794.6	39393.5	98177.2	49641	44234.7	47382.5	39232.2	57262.8	59446.1	63306	43651	36252.1	42809.4
P97457	0	0	0	0	0	0	0	0	0	0	0	0	8597.63	0	10511.8	0	0	12721.6	0	0	35.9568	0	0	0	0	0	0	0	0	0
P97461	0	0	3322.1	0	0	0	691.207	0	0	0	0	0	0	0	0	0	2122.35	0	0	0	74.4931	0	0	101.135	0	0	0	0	0	0
P97494	772.717	0	0	835.054	1383.82	1308.41	1424.53	1432.84	1547.31	0	0	0	1197.82	1491.32	1030.45	1321.11	3334.7	1736.99	3014.13	0	1660.02	1774.79	1630.1	1290.83	1196.97	1459.95	1035.24	1092.92	1167.73	1312.46
P97765	7723.39	0	0	0	41268.8	55219.4	57023.9	33729.8	0	0	0	0	48307.7	48483.6	61739	32764.3	3542.52	0	11675.1	0	35980.6	40283.3	51302.8	32027	2032.57	3167.4	2140.49	2642.36	11813.4	10891.4
P97772	0	0	0	0	4929.25	3582.4	2572.16	5594.49	0	0	0	0	588.731	0	693.015	2067.77	0	0	0	0	1318.36	1198.24	1183.8	1087.13	1207.4	1025.62	1459.99	1607.66	824.596	962.626
P97792	0	0	0	0	1215.38	1198.26	1792.08	1010.63	0	0	0	0	1270.45	0	3000.73	665.7	0	0	0	0	2107.66	3018.9	3492.27	1785.73	0	0	0	0	627.703	829.766
P97797-2	0	850.695	0	0	3620.69	3672.12	17573.7	3439.94	0	0	0	0	3956.23	4490.79	4485.21	1911.35	0	2046.19	0	0	6944.37	9813.56	9806.41	6578.79	4795.36	6697.26	5828.74	5308.28	3861.23	4559.3
P97798;P97798-2;P97798-3;P97798-4;P97798-5	0	0	0	0	620.581	987.304	3146.67	1085.52	0	0	0	0	1205.56	0	1582.01	798.812	0	0	0	0	3338.35	3481.22	4112.71	2810.99	0	0	0	1370.19	1639.57	1787.92
P97807;P97807-2	4304.88	9895.62	6209.53	11483.2	2426.59	2429.69	2659.6	1802.77	8167.73	9283.65	8149.12	9905.93	3327.62	4801.06	3326.09	3164.9	4510.22	5731.17	18037	7647.16	2024.9	1811.01	2511.3	1805.83	8388.52	9797.69	11836.4	10493.9	4200.8	3859.74
P97822;P97822-2	0	0	0	0	0	774.903	2488.53	0	0	0	0	14765.1	9278.87	9999.66	9419.08	2332.35	0	8035.05	0	0	0	0	0	0	0	0	0	0	0	0
P97823;P97823-2	25224.8	0	5923.38	0	637.034	1171.35	1493.24	1847.58	0	0	5698.04	4220.01	1488.21	0	3107.09	0	13248.8	3505.06	23843.8	8499.36	1467.29	1820.07	1963.36	2909.37	2060.58	0	1113.69	0	1277.71	1409.41
P97825	0	0	0	0	0	0	0	0	0	0	3123.4	5006.92	890.042	4174.78	5289.28	1404.57	6496.72	6858.84	5893.27	12383.4	596.175	714.284	569.185	187.624	0	0	0	0	0	361.278
P97858	0	0	0	0	0	0	0	0	0	0	0	0	0	0	0	0	0	2544.98	0	0	221.696	172.62	0	5894.76	0	0	2551.62	0	576.811	0
P98084	0	0	0	0	0	675.919	1521.74	836.993	0	0	0	0	0	0	0	407.636	0	0	0	0	2836.56	2181.23	2520.71	2258.82	0	0	0	0	970.924	1003.03
P98086	0	0	0	0	22460.7	23984.5	9088.64	0	23633.3	0	0	0	0	23350.9	16697.1	10394.8	0	19268.9	0	0	24870.7	27529.4	30782.4	23060.4	11477	13305.5	12273	13703.7	11909.8	13044.2
P98191	0	0	0	0	1477.81	923.548	1553.28	1479.64	0	0	0	0	0	0	0	0	0	0	0	0	936.386	588.609	948.286	1062.32	0	0	0	0	674.563	755.959
P98200	0	0	0	0	1526.59	1330.57	1009.42	1612.92	0	0	0	0	961.375	0	0	796.231	0	0	0	0	437.373	422.086	371.263	453.05	0	0	0	0	0	368.004
P98203;P98203-2;P98203-4;P98203-5	2.03282e+06	153826	718608	102420	163524	20777	49204.7	74325.4	131069	48985	375427	1.03944e+06	84862.5	101595	227622	100218	16176368	389263	8.12631e+06	746772	4143.77	22729.5	41139.9	9500.99	330734	60127.6	73135.1	151236	36730.6	6182.93
P99024	9804.07	4875.51	16353.7	17644.2	131522	141786	139688	153042	25535.8	33985.6	13546.8	7351.67	86081.4	72673.7	84534.9	105615	15693.6	13918.8	68778.9	27948	48322.2	59546.9	55930.7	38479.2	12856.8	12509.2	9202.37	9405.06	33490.9	41280.4
P99026	8490.88	10754.2	10040.6	6858.73	2839.1	2908.66	3699.95	2068.77	0	6589.8	6985.09	15775.2	3457.26	4059.94	3086.74	3342.04	11357.1	7325.4	40503.9	21146.2	1133.84	956.488	1744.02	1253.56	5577.03	6536.8	5535.28	10440.2	1523.86	1862.62
P99027	0	0	10800.7	0	568.954	2021.89	2608.52	1973.26	0	0	12177.7	108870	42861.5	32083.9	25298.7	5483	25089.4	27627.3	54938.5	29647.4	1217.02	1652.2	1863.78	736.873	1915.31	2223.43	2364.94	7636.08	286.223	418.641
P99029;P99029-2	9446.95	22749	14262.6	12984.4	2543.63	3813.58	3589.57	2101.64	44748.4	6625.45	17996.8	10547.3	4993.41	9144.72	7878.03	2816.46	8279.55	8783.5	7498.93	17477.2	7437.71	11120.2	15380.1	20701.1	11760.3	8791.7	12782.1	6087.69	9787.49	8282.86
Q00493	0	0	3394.81	5072.43	1150.19	1733.51	1956.28	1135.58	0	0	2404.41	4609.56	1250.85	0	1276.69	2026.84	3512.49	0	6892.08	0	293.93	7578.43	553.063	198.666	13819	19918.5	19699.7	17520.2	1429.16	3826.23
Q00612	2509.87	0	1180.82	2156.7	13359	7671.77	5295.12	7038.53	0	0	0	0	3503.77	2160.68	4651.67	2534.94	0	0	4446.25	0	4868.95	4640.06	4929.29	3605.49	0	1431.58	26017.2	1074.87	2959.12	3601.24
Q00977	0	0	1945.67	0	0	0	0	0	0	0	1650.89	0	0	0	0	0	0	0	0	0	0	0	0	967.805	0	0	0	0	594.348	0
Q01063;Q01063-2	0	0	0	0	867.418	1144.65	709.945	1499.47	0	0	0	0	2030.73	2676.39	1059.69	2098.43	0	0	0	0	4553.42	3792.13	3702.04	3198.98	0	307.15	0	0	2605.41	2584.17
Q01065	4804.57	5993.57	3694.61	3922.74	5191.54	6272.33	6993.02	5358.17	5519.37	4257.59	4478.35	6710.62	4822.65	3404.34	3469.02	4670.79	15771.8	12738.9	8770.04	14909.6	8059.14	7483.02	7489.33	6975.87	2341.58	2203.89	2685.56	2846.79	2948.82	3010.62
Q01097	0	0	0	0	4928.1	3112.12	3171.66	4747.37	0	0	0	0	1292.74	0	0	1616.57	0	0	0	0	1026.35	1223.09	866.257	1001.02	2700.13	2244.41	2516.8	2183.19	897.428	1090.24
Q01149	4367.92	13535	13518.7	3701.28	3074.61	1900.05	1326.14	826.732	8514.93	2758.2	10715.7	75580.9	25940.5	29125	27915.4	11423.1	19474.5	48249.2	16067.2	50801.6	1409.66	1693.46	2161.38	557.495	53060	2646.74	2583.05	2033.1	1453.02	262.986
Q01405	0	0	0	0	3007.24	2640.52	4058.47	4442.11	0	0	0	0	1376.97	1249.73	1173	2458.43	0	0	0	0	2548.44	2519.71	2237.96	2014.3	0	0	0	0	1080.41	1443.78
Q01768	2915.58	3382.37	22149.5	7568.46	5841.95	8662.66	11956.7	5252.72	8673.04	8299.92	14168.7	13481.9	6984.77	7433.43	12036.3	4375.71	5072.47	8256.27	6916.6	11231.4	5960.8	8203.75	9575.14	9778.52	5792.83	1558.23	4972.6	4900.29	7599.92	7491.53
Q01853	5471.82	4032.11	8640.35	5287.68	89013.9	98815	122069	85500.2	4752.94	7253.26	4581.64	3545.89	39873.9	29724.4	61814.7	52731.3	4376.06	8221.96	16001.1	2760.79	88371.2	100512	102508	65619.5	3568.06	5286.86	4966.64	7681.67	30716.4	33989.3
Q02053	5771.74	6415.91	6547.04	5958.76	14789.8	13701.3	11669.5	16457.2	5669.47	7512.09	4307.57	4640.04	8595.63	6048.23	7036.17	8660.37	6090.66	6007.38	7555.04	3737.22	14121.5	13538.7	12176.7	11801.8	3405.26	3449.89	3386.17	3980.27	10021.1	12814.9
Q02105	0	0	0	6334.08	1362.45	420.059	8699.65	1510.26	0	0	5062.62	8384.76	1863.23	2001.43	3095.19	1968.19	5366.43	4731.64	0	0	762.583	841.586	831.128	446.505	40690.2	63608.4	48254.3	48527.9	11291.9	10441.6
Q02248	670201	42107.5	124110	70281.3	48551.7	40700.5	85377.5	58518.7	58044	14976.1	61075.2	207869	18005.3	28612.6	48897.6	33792	190721	119167	858664	197275	31234.8	37975.9	49186.6	29605.3	51351.7	35804.4	18530.7	68740	18518.1	21883.6
Q02357-6	519935	321373	149314	117234	43765	33703.9	34810.4	25250.3	582484	171386	273881	356307	29067.7	64219.6	41532.3	12005.8	135425	90813.9	127949	543157	8280.84	10460.3	8433.88	6373.59	26156.9	54616.8	28152.3	47859	6893.17	4743.26
Q02566	0	0	0	0	456.319	3698.22	1202.98	3441.14	7452.2	0	4146.61	18818.7	8206.58	7360.22	5112.42	1419.22	5403.27	4990.18	4239.11	4210.4	2236.24	2450.07	361.412	3918.38	5125.95	0	12639.6	0	6370.64	3329.22
Q02819	0	0	1834.52	2648.56	0	299.848	215.349	0	0	0	2029.64	0	1114.06	1227.78	3008.16	1085.77	0	2828.52	4327.19	0	0	336.737	609.705	95.5724	7794.82	12580.5	7921.93	10651.8	2209.28	1632.07
Q03137;Q03137-2	0	0	0	0	3468.57	1027.31	1124.71	1351.68	0	0	0	0	0	0	0	749.435	0	0	0	0	1641.92	1776.38	1575.23	1548.88	1745.91	2411.8	1623.7	2416.7	1482.9	1963.43
Q03141;Q03141-2;Q03141-3	0	0	0	0	3144.24	2986.73	3459.3	3154.84	0	0	0	0	3780.66	5948.82	6706.46	1809.13	0	0	0	0	4111.67	4069.9	3889.19	3158.99	0	0	0	0	1775.56	2088
Q03173;Q03173-4;Q03173-5	0	0	0	0	2088.36	2358.12	2320.35	1962.36	0	0	0	0	1332.32	969.637	987.172	1531.33	0	0	0	0	4069.92	4206.57	4337.24	3041.55	0	0	0	0	1375.77	1517.2
Q03265	149146	166158	168509	190233	42760.7	55482.1	46022.5	34884.3	179504	175707	155774	182398	61056.7	89320.7	93115.1	56140.9	156917	145776	347669	224957	34285.7	36422.7	40650	41060.3	171122	210956	206449	213650	73390.6	57128.6
Q03391	0	0	0	0	1362.86	886.174	819.82	1235.16	0	0	0	0	0	0	0	0	0	0	0	0	0	0	0	72.2586	0	0	0	0	0	0
Q03958	0	0	0	0	2107.72	2768.83	4911.87	1501.69	0	0	0	6092.17	2466.02	1782.5	4042.12	1885.37	0	0	0	0	1191.78	1492.38	1877.91	930.275	0	0	0	0	752.891	1277.97
Q04447	57587.9	54391	38224.8	54262.8	183209	267956	278122	174514	49967	56489.1	46021.1	51287	100668	78807.1	76681.3	110019	60522.3	39915.8	38118.1	57616.1	145916	156704	163279	119280	34632.8	37796.8	36553.1	36155.5	87126.2	102969
Q04690;Q04690-2	0	0	0	0	1900.84	1664.01	703.824	3276.12	0	0	0	0	1074.52	1509.59	1431.98	1883.86	0	0	0	0	2508.25	1949.47	1615.11	1302.21	999.67	0	527.47	0	1110.07	1620.96
Q04736	0	0	0	0	0	0	0	0	0	0	0	0	0	0	0	0	0	0	0	0	2842.21	2922.76	2990.35	1931.15	0	0	0	0	893.205	1030.23
Q05186	0	0	0	0	0	3423.17	5558.53	1085.58	0	0	0	0	1822.4	0	1851.39	1177.42	4408.36	1297.99	0	0	276.634	481.28	1908.6	488.972	21518.9	28881.9	23753.2	25332.1	5226.28	4614.87
Q05512;Q05512-2;Q05512-3;Q05512-4	0	0	0	0	0	445.025	0	556.247	0	0	0	0	579.043	0	0	258.129	0	0	0	0	487.065	391.701	491.257	418.379	0	0	0	0	291.51	369.2
Q05769	0	0	0	0	0	0	0	0	0	4904.34	3383.68	0	1511.08	1315.32	0	1924.39	10699.6	8898.43	5899.42	7781.93	1306.49	302.269	387.01	540.786	6861.83	7756.44	6827.02	9038.15	1887.65	2052.58
Q05793	0	0	3031.93	0	0	0	0	0	0	0	0	0	0	0	0	0	0	0	0	0	0	0	0	0	0	0	0	0	0	0
Q05915	0	0	0	0	0	0	362.807	444.513	0	0	0	0	0	0	0	0	0	0	0	0	2262.23	2422.48	2214.28	1437.35	0	0	0	0	1420.5	1576.2
Q05920	15447495	24126414	9153874	19110560	2.94446e+06	2.46455e+06	1.13971e+06	2440914	16997728	26074656	13439154	12753691	4494964	5.47078e+06	1.79119e+06	6753745	20845238	17239198	9587053	13494947	1.42656e+06	953044	546224	803422	11565141	15116325	16231540	11182795	3.70148e+06	2765349
Q06138	0	0	0	0	3866.45	4134.3	5399.13	3826.02	0	0	0	0	3182.21	2542.84	3389.59	2323.11	0	0	0	0	2677.35	3002.19	3081.02	2553.11	0	0	831.232	0	2109.81	2338.92
Q06185	0	4274.76	28782.5	8341.28	5357.21	5283.16	10484.5	3691.36	0	7974.58	11485.5	9508.03	5273.67	4333.11	31170.9	21968.5	0	18825.7	0	0	4926.47	5168.13	7508.58	30949.3	32686.2	20191.3	29759.1	13756.6	8552.89	5538.75
Q06318	14228.3	9006.97	9239.88	8670.13	3588.54	2595.75	2087.77	1827.51	15528.2	9691.55	77527.9	876167	251555	181173	149015	36059.9	146548	194414	61122.7	192117	4210.01	6171.07	9001.51	1962.89	8970.82	13556.3	11457.4	13560.5	2386.87	1570.93
Q06890	0	0	0	0	0	260.16	1538.07	266.729	0	0	0	0	677.964	533.762	610.181	303.625	0	0	0	0	0	0	0	2835.63	5590.82	7683.38	6626.73	7859.03	319.943	777.711
Q07076	22322.7	4779.08	8284.76	4914.67	21731.7	30535.4	25805.6	21845	0	3035.93	3788.61	8353.58	28172.1	38415.8	39528.6	26560.4	10583.4	5012.75	40652.3	10274.9	93717.2	98100.3	127704	75992	4375.34	3605.16	3483.78	7914.57	36172.7	42731.5
Q07113	2869.3	0	0	0	0	0	717.066	699.025	0	0	0	1439.48	0	0	0	1337.64	2347.36	0	137873	0	0	0	210.367	0	0	0	0	0	0	0
Q07797	285961	0	97295.3	0	49028.6	21678.9	47067.2	35809.7	251258	84015	131699	26244.9	1218.27	9840.22	18653.4	6458.09	79668.8	1740.47	105372	0	1253.26	6137.49	5463.93	2721.6	12705	18136.2	15455.9	17812.8	3611.75	2103.13
Q08331	1355.93	0	2392.04	2674.57	12005.2	13107.7	16333.5	9831.66	3249.99	2387.17	2338.7	0	21730.7	16794.5	8525.04	13601.4	0	0	4829.81	0	17578.7	21023.3	14833.8	12634.2	0	1643.94	1725	773.613	5622.11	14219.9
Q08460;Q08460-2;Q08460-3;Q08460-4;Q08460-5	0	0	0	0	2247.87	0	0	1955.08	0	0	0	0	1664.11	2648.49	0	2037.39	0	0	0	0	4670.12	4754.57	4208.34	3865.52	7785.86	7579.46	7622.64	5755.24	3419.64	3668.71
Q08509	0	0	0	0	6094.99	2940.55	3649.49	2856.94	0	0	0	0	3019.95	957.989	2689.07	3952.16	0	0	0	0	6376.64	6768.02	7683.94	5517.99	0	0	0	0	3040.62	3255.97
Q0KL02;Q0KL02-3;Q0KL02-4	0	0	10820.5	0	1011.62	1027.49	449.76	1470.24	0	0	0	9933.82	619.976	478.031	3218.83	939.38	0	0	0	0	1719.76	1518.42	1221.85	1332.66	330.899	0	0	760.364	1092.64	1329.65
Q0VBD0	0	0	0	0	0	0	0	0	0	0	0	0	0	0	0	151.688	0	0	0	0	0	0	0	0	0	0	870.611	0	0	0
Q0VBF8	0	0	16951.7	0	0	759.471	458.191	307.809	0	0	38917.5	0	3279.78	0	4730.42	719.988	2172.33	24681.6	2827.03	0	2301.22	1967.66	2837.17	22283	38273.4	3998.15	20110.1	1784.8	6714.89	1549.08
Q0VE82	0	0	0	0	8429.73	5034	5796.06	6920.24	0	0	0	0	4517.75	3194.19	3040.73	4418.9	0	0	0	0	6404.48	6023.73	4500.7	4875.34	0	0	0	0	3583.32	3995.19
Q11011	6014.91	4152.14	4901.34	4425.53	4253.81	3564.44	3459.4	4208.14	5054.66	4760.83	4195.65	5977.01	3445.51	3538.43	3140.14	3661.36	7296	3992.92	16980.7	6127.3	3962.03	4262.47	4044.63	3391.15	3164.51	4039.89	3875.43	6053.5	4281.44	4918.01
Q11136	10428.9	0	3273.12	3266	1391.54	1471.67	1273.83	1058.83	0	0	0	0	1124.37	1256.41	1722.35	952.802	0	1682.35	11734.4	3725.27	816.106	763.321	936.191	857.457	1429.63	0	0	3585.71	962.898	1253.67
Q148V7-2	0	0	0	0	2349.05	936.364	828.958	1248.55	0	0	0	0	316.151	0	466.422	949.311	0	0	0	0	1924.48	1817.25	1937.38	1675.1	0	0	0	0	1209.71	1465.94
Q149F3	0	0	0	0	1444.96	1753.01	1234	1859.8	2582.94	0	0	839.458	1405.27	782.755	0	1241.93	0	0	0	0	2282.12	2055.32	2296.94	1788.93	559.908	685.395	560.783	0	1181.2	1333.18
Q149L6	0	2816.38	2232.65	0	2088.57	1492.2	2002.79	1594.11	0	0	0	0	2842.95	0	3103.19	1368.47	0	0	0	0	384.983	616.247	478.906	430.765	5022.48	6514.25	5165.4	5840.17	1352.95	1416.51
Q14BI2	0	0	0	0	1415.67	2946.6	1825.47	1093.8	0	19861.5	0	0	1724.32	0	0	2052.1	1824.85	2335.63	0	0	4179.6	4216.03	3989.01	3849.37	5790.9	5463.49	5354.9	3683.72	3987.17	3292.29
Q1LZI2	0	0	0	0	5258.28	0	687.972	0	5147.53	0	0	0	0	0	0	0	0	8664.8	0	0	0	0	0	1344.43	19793.7	8387.8	12931.9	0	1521.76	4833.15
Q2HXL6	0	0	0	0	0	0	0	0	0	0	0	0	0	0	0	0	0	0	0	0	0	0	1260.12	0	2593.91	2336.9	2644.27	2347.89	629.776	664.149
Q2M3X8;Q2M3X8-2;Q2M3X8-3;Q2M3X8-4;Q501J7;Q501J7-2;Q501J7-3	0	0	0	0	0	1656.29	1503.43	961.861	0	0	0	0	0	0	0	693.739	0	0	0	0	682.046	554.381	526.885	303.355	0	0	0	0	0	160.369
Q2NL51	0	0	0	0	51640.7	40916.2	29204.6	21882.1	0	0	0	0	33934.6	186953	77264.9	23202.2	0	0	0	0	13445.4	18531.9	18292.4	12767.6	2002.83	0	2270.04	0	7065.78	6979.05
Q2PFD7;Q2PFD7-2	0	524584	0	0	20461.7	21965.1	24543.6	17588.6	0	0	0	68579	22079.8	16951.7	18597.7	15165.1	0	0	0	19424.7	8842.41	9824.19	11042.1	7399.41	0	12463.3	1255.6	1344.3	3624.9	4159.32
Q2TBE6	0	0	0	0	3207.33	2468.34	3655	2701.07	0	0	0	0	2130.03	1151.78	2063.21	1582.96	0	0	6779.55	0	2089.94	2142.82	2272.99	1664.77	529.937	0	0	1145.31	1004.7	1374.32
Q2TPA8	0	0	0	0	0	394.669	260.552	181.855	0	0	0	0	0	0	0	375.572	0	0	0	0	0	284.888	180.521	114.859	0	0	662.108	0	129.978	170.061
Q32M02	263452	277025	131416	206002	63541.6	35803	36651.5	34930.8	264704	199923	159695	179897	66301.2	60887.2	103035	20059.9	88281.3	29274.7	81131.9	168705	7249	6783.28	10596.9	5012.46	8166.63	4164.2	2967.4	0	0	1723.84
Q3B7Z2	0	0	0	0	1519.26	1320.61	1203.77	1572.3	0	0	555.552	0	1148.56	615.429	627.536	1046.64	0	0	0	0	1891.32	1990.18	1505.49	1551.5	645.35	0	0	0	1301.44	1291.91
Q3KNM2	0	0	0	0	1417.21	959.367	2144.24	1020.34	0	0	0	0	0	0	758.265	418.23	0	0	0	0	563.101	595.04	656.817	2104.9	1269.16	0	1136.4	0	1305.87	583.513
Q3KQJ0	0	0	7532.65	0	0	0	215.721	0	0	0	6483.04	0	0	0	1566.57	0	0	0	0	0	0	247.262	0	9693.75	6648.66	0	3691.2	0	925.341	329.929
Q3TBT3;Q3TBT3-2;Q3TBT3-3	0	0	1376	2157.73	0	0	0	0	0	3508.39	0	0	0	0	0	1070.95	0	2053.53	0	0	0	502.476	349.527	0	18969.7	22982.8	19917.6	17554.1	3880.32	3910.03
Q3TCJ1	0	0	0	0	1773.98	1956.08	2238.36	1596.73	0	0	0	0	253.978	0	1079.93	962.072	0	0	0	0	1982.26	2372.63	2206.4	1949.33	0	0	462.984	0	837.412	942.695
Q3TDK6;Q3TDK6-2	86639.8	10152.9	4398.09	8760.21	5707.84	4432.22	3934.23	4305.97	9300.86	3501.03	5106.69	20875.2	2564.65	9534.77	2228.73	1286.71	50894.5	20193	31586.5	28039.6	3151.97	3316.32	4103.95	6482.74	3047.03	3032.8	2876.23	2252.59	2329.9	3034.21
Q3TDN2;Q3TDN2-2	0	0	0	0	0	2363.31	3665.21	2714.12	0	0	0	0	0	0	0	2239.72	0	0	0	0	1486.08	2186.78	1358.55	1265.88	0	0	0	0	1701.32	1574.57
Q3TDQ1	0	9653.88	0	0	1976.7	992.394	966.395	497.76	0	7657.65	0	0	1812.67	3030.6	4951.79	1975.76	0	9387.57	24968.9	0	2230.08	2020.91	1871	2046.98	13946.5	14147.8	12981.7	16165.1	3563.83	3664.2
Q3TES0	82367.9	83142.6	50249.7	59155	12471.3	10534.1	9922.95	7397.55	111594	100428	79303	132163	15650.5	29262.6	39390.5	15663	165874	117247	132516	301673	2052.89	6804.2	3205.82	1981.73	63586.5	98060.3	44224.5	147261	5664.67	7910.18
Q3TFD2;Q3TFD2-2	0	0	0	0	4180.5	3007	3902.35	3695.98	0	0	0	0	2228.92	1548.06	1952.11	2082.58	0	0	0	0	2165.63	2058.23	2550.32	1829.7	3088.65	3303.9	2662.63	2649.78	1355.91	1598.62
Q3THE2	0	0	10844	0	2546.8	4615.96	8024.28	2827.77	0	0	4225.15	39128.7	15435.8	11090.1	20898.5	3642.28	6333.94	9005.26	38900.8	19177	2070.16	2425.59	3531.67	1063.61	0	0	0	2795.04	965.549	1073.44
Q3THG9	0	8153.6	0	7178.92	3629.35	3759.13	4421.12	2897.53	0	0	6582.55	0	2292.6	832.253	969.448	2342.26	0	0	0	0	1981.16	1493.46	1900.73	3313.04	0	0	0	0	1140.29	1927.92
Q3THK7	0	0	5182.27	5648.53	2993.34	2780.72	3201.69	3299.09	11386.3	7401	4408.55	0	2874.47	2058.74	3149.61	2274.14	0	2098.39	0	0	5020.71	5224.22	5612.19	3859.79	1736.77	1198.9	1293.53	1253.69	3802.5	3740.29
Q3THS6	0	0	3337.85	0	3423.99	3524.32	4629.15	3216.79	0	0	0	0	1800.85	1570.72	1993.29	1339.47	0	0	12316.7	0	1936.82	1835.7	2042.66	1370.61	399.752	0	907.972	1312.61	1200.22	1584.46
Q3TIV5;Q3TIV5-2	0	0	0	0	1655.81	939.883	1422.94	845.166	0	0	0	0	900.65	0	595.457	0	0	0	0	0	0	266.185	295.872	0	0	0	0	0	0	0
Q3TJZ6	0	0	0	0	3690.12	3354.15	3108.29	4063.67	0	0	0	0	1668.01	2424.84	1930.91	2168.28	0	0	0	0	2110.5	1947.65	2078.13	1754.73	0	0	0	0	895.881	1073.05
Q3TLH4;Q3TLH4-5	0	0	0	0	36773.6	39608.6	2313.53	2813.29	92366.1	95165.6	0	0	1920.78	50596.9	40089.2	63865.5	0	0	0	0	504.458	624.366	29192.5	439.141	0	0	0	0	56679.3	24141
Q3TLI0	0	0	0	0	2968.1	2986.83	2015.79	5071.81	0	0	0	0	1334.07	0	3119.61	1896.31	0	0	0	0	3688.41	3281.15	2635.14	3232.74	0	0	0	0	2167.54	2577.78
Q3TMH2	0	0	0	0	5626.02	6430.41	5961.67	4833.46	0	0	0	0	10380.1	13532.6	13971	7497.48	0	0	0	0	21354.3	26372.2	32901.5	20740.7	821.15	0	1137.88	0	12881.9	16996.3
Q3TMP8	0	0	9099.82	0	1142.7	4932.48	5982.04	4365.48	0	0	47229.8	0	0	46142.7	0	24182.4	0	0	0	0	2001.74	729.844	1760.25	8749.23	21139.6	0	1984.77	0	3242.16	3973.49
Q3TVA9;Q3TVA9-2	0	0	0	0	2597.84	2109.81	1974.62	2355.64	0	0	0	0	1746.18	1102.88	1575.64	1016.35	0	0	0	0	767.591	617.943	887.217	741.118	0	0	1183.16	0	667.658	478.912
Q3TVI8	0	0	0	0	0	0	0	1062.3	0	0	0	0	0	0	0	295.445	0	0	0	0	0	0	0	0	6989.54	7634	6893.32	7879.11	1015	1539.36
Q3TXS7	24076.7	24028.4	9614.33	21828.3	4159.32	2409.92	3072.56	2838.61	38768.7	27993.7	22038.6	28903.5	3795.18	13699.6	7751.6	2298.31	17899.5	15938.7	16883.4	19807.6	1702.95	1924.02	1849.28	1833.72	4103.17	9852.24	8635.52	3329.11	1506.13	1389.34
Q3TXX4	0	0	0	0	0	2144.25	0	863.769	9078.02	18866.2	11128.5	11663.7	2687.47	5754.41	3057.68	3178.87	11507.9	11404.8	0	14041.3	18366.6	15467.7	15811.8	15672.6	21704.4	20516.9	22466.1	21105.4	16826	16478.8
Q3TY60-2	0	0	0	0	2987.58	3173.35	4251.24	2051.17	0	0	0	0	2092.7	2045.09	2285.96	1161.27	0	0	0	0	4928.96	6494.77	7208.63	4071.39	1027.95	979.68	0	0	1847.87	2433.65
Q3TYD4;Q3TYD4-2	0	0	0	0	0	0	0	0	0	0	0	0	0	0	0	0	0	0	0	0	0	0	0	0	5716.23	5735.79	4569.25	4929.8	1324.3	800.282
Q3TYD6	0	0	0	0	1466.85	1517.93	1508.52	1257.2	0	0	0	0	0	0	0	399.291	0	0	0	0	0	1	0	0	0	0	0	0	0	448.739
Q3TYX3	0	0	0	0	1829.99	1389.67	1225.06	2203.34	0	0	0	0	2711.8	2266.55	2234.08	1052.44	0	0	0	0	1918.73	1974.14	1891.27	1584.95	0	0	0	0	933.637	871.485
Q3U0M1;Q3U0M1-2	0	0	0	0	3349.37	3009.2	3212.68	4321.38	0	0	0	0	1853.1	3736.73	0	2047.4	0	0	0	0	3573.44	3202.27	3134.74	2616.84	0	0	0	0	2103.82	2492.53
Q3U0V1	0	0	1684.18	2721.51	3431.04	2233.81	5863.27	3260.32	0	0	0	3125.28	2157.87	2297.77	2196.88	1153.55	3398.4	3815.8	0	0	338.384	548.018	353.261	234.587	0	0	0	0	0	1
Q3U1F9	0	0	0	0	0	0	0	255.843	0	0	0	0	424.282	0	1059.93	297.218	0	0	0	0	193.22	279.855	201.601	147.715	3181.13	3745.78	4069.93	3357	992.912	905.865
Q3U1J4	5058.02	1389.44	3811.6	1660.33	4673.33	4473.64	4503.92	5473.04	0	1968.52	0	1047.93	2518.25	1818.62	2531.09	3303.39	2970.19	2285.54	16636.8	0	2671.9	2811.67	1880.95	2373.58	1119.57	1561.62	934.073	3479.68	1605.96	1674.51
Q3U2P1	0	0	0	0	0	4247.41	738.729	4375.79	0	0	0	0	673.147	0	5370.15	4114.8	0	0	0	0	3767.44	3707.02	3517.2	3256.34	0	0	868.056	0	1112.12	1222.16
Q3U308	0	0	0	0	0	0	428.852	0	0	0	0	0	0	0	0	277.12	0	0	0	0	482.957	445.996	445.782	314.759	0	0	0	0	0	258.668
Q3U3R4;Q3U3R4-2	0	0	0	0	0	0	0	0	0	0	0	0	0	0	0	489.613	0	0	0	0	178.709	0	0	13952.2	8238.88	9664.63	10065.2	9985.65	1656	1551.07
Q3U7R1;Q3U7R1-2	0	0	0	0	0	1923.97	1856.54	1508.07	0	0	0	0	0	0	0	0	0	0	6286.33	0	3661.95	3464.32	3340.46	0	0	0	0	0	0	2404.46
Q3UDP0	0	0	0	0	0	0	0	0	0	0	0	0	0	0	0	0	0	0	0	0	614.848	544.677	659.668	466.501	0	0	0	0	270.147	473.921
Q3UEZ8	0	0	0	0	399.69	597.908	15563.1	593.662	0	0	0	0	913.733	1487.58	1861.79	1188.07	0	0	0	0	12254.1	14619	18095.7	13336.5	3094.41	0	1516.91	0	4792.89	5876.24
Q3UFQ8	0	0	0	0	1152.01	802.597	355.506	1069.37	0	0	0	0	586.919	0	0	487.69	0	0	0	0	1261.12	1051.48	958.962	728.093	0	0	0	0	777.784	948.281
Q3UFT3	0	0	0	0	672.163	1590.58	1839.6	933.297	0	0	0	0	1143.75	0	0	1575.74	0	0	0	0	1680.99	1442.09	1378.54	1096.79	0	0	0	0	807.473	884.148
Q3UGC7	0	0	0	0	29043	20925.1	26787.6	13054.1	426282	134090	223626	4909.26	27764.4	33664	39019.8	16229.1	1738.72	3646.06	0	0	7717.64	14656.3	16952.6	6768.25	0	104553	47027.5	30793	8795.43	5258.42
Q3UGP8	0	0	3219.95	0	0	1339.47	0	1703.2	0	0	3115.28	0	0	0	1573.96	581.815	0	3223.58	0	0	686.921	620.019	577.98	9588.21	4788.8	0	2301.47	924.221	1070.04	518.62
Q3UGR5	0	0	2216.98	0	0	1119.09	1635.81	667.66	0	0	2544.41	0	694.096	0	2324.04	685.762	0	0	4656.04	0	1013.35	1388.11	1032.17	1686.82	0	1291.25	708.217	0	850.119	816.896
Q3UGY8	0	0	0	0	1605.05	1399.05	745.975	1838.21	0	0	0	0	3013.33	2310.09	2403.78	1705.54	0	0	0	0	1204.54	1259.66	1209.33	865.499	0	0	0	0	1037.13	1043.8
Q3UH60	0	0	0	0	1291.31	1153.25	894.523	1836.3	0	0	0	0	1436.59	516.694	0	1116.15	0	0	0	0	1864.71	1754.12	1438.97	1502.14	3165.22	0	0	0	1158.39	1296.37
Q3UH66-3;Q3UH66-4;Q3UH66-5;Q3UH66-6;Q3UH66-7	0	0	0	0	2575.82	2244.68	1515.62	2507.08	0	0	0	0	3710.17	3215.25	2852.11	3094.98	925.014	1245.83	0	0	6049.84	5177.67	4089.06	3936.76	2812.62	1708.88	2168.87	867.184	2358.4	2642.15
Q3UHB8	0	0	0	0	705.675	341.311	849.555	889.236	0	0	0	0	871.684	1058.41	0	663.089	0	0	0	0	1488.92	1647.11	1471.58	1146.27	0	528.283	637.969	0	1124.61	1378.33
Q3UHC7;Q3UHC7-2;Q3UHC7-3;Q3UHC7-4	0	0	0	0	7294.97	6632.78	6039.77	6746.43	0	0	0	0	5275.92	3500.55	7264.25	2872.48	0	6577.39	0	0	2447.87	2340.96	3029.1	2093.42	5681.16	5385.87	4028.44	4183.42	1497.35	1910.4
Q3UHD2	0	0	0	0	3778.38	3488.09	4060.45	4060.37	0	0	0	0	1063.12	0	790.785	1387.81	0	0	0	0	1430.51	1431.8	1450.2	1265.64	0	0	0	0	648.578	686.151
Q3UHD6;Q3UHD6-2	10705.9	0	840.842	1180.68	13658.8	14259.3	13376.2	13540.1	0	0	0	0	4588.46	2915.08	3890.03	8698.49	0	2853.56	0	0	5748.62	5881.35	6260.83	5005.02	1713.04	1134.27	874.268	668.282	2557.47	3218.2
Q3UHD9;Q3UHD9-2	0	0	0	0	0	832.328	570.757	636.402	0	0	0	0	0	0	0	402.049	0	0	0	0	441.637	411.275	288.883	350.41	0	0	0	0	369.165	523.713
Q3UHH2	0	0	0	0	0	405.163	0	347.319	0	0	0	0	0	0	0	421.286	0	0	0	0	1826.55	1782.46	1357.19	1643.38	1057.73	0	1321.31	1439.1	1202.43	1097.54
Q3UHI4	0	0	0	0	1300.11	1211.51	1523.72	813.978	0	0	0	0	861.1	0	827.316	437.715	0	0	0	0	1211.89	1572.63	1698.21	1158.14	0	0	0	0	895.756	956.17
Q3UHJ0	5002.96	86861.8	3775.6	13959.2	10291.3	7474.31	4982.98	11050.7	4575.37	3979.8	23036.5	6931.2	12590	15836	8545.63	18462.6	12787.4	3687.65	59214.9	4808.94	14588.3	14099.6	14559.5	13201.2	3464.74	23539	26936.9	37961.5	12869.3	21045.2
Q3UHK1	0	0	0	0	3708.12	1343.39	1707.52	1835.79	0	0	0	0	0	0	0	1393.21	0	0	0	0	2093.94	1762.51	1388.56	1681.98	3391.53	966.721	2111.41	0	1718.15	1883.57
Q3UHL1	2233.58	4591.14	652.119	2326.25	9393.55	7291.35	7265.85	8751.05	5320.03	5139.78	3990.4	3994.99	4303	3106.65	2700.13	6270.9	14535.3	12350.2	8448.73	13526	4974.98	4670.95	4303.98	3722.87	9789.64	10021.8	9373.56	8082.24	3492.64	4422.84
Q3UHX2	0	6002.2	2622.62	5541.16	3056.21	4785.82	4666.34	2691.83	0	0	4870.86	9132.32	4100.37	6945.57	4785.23	3146.25	7575.3	6279.65	5217.54	10686.5	4711.26	5473.32	6747.69	3720.79	2434.83	0	0	2637.65	2142.12	2362.33
Q3UIU2	0	0	0	0	0	0	0	0	0	0	0	0	0	0	1487.14	0	0	0	0	0	493.415	0	517.829	5555.14	0	6176.96	0	0	2481.24	1419.34
Q3UJ81	0	0	0	0	0	0	0	0	0	0	0	0	0	0	0	0	0	0	0	0	0	0	0	800.198	0	0	0	0	0	0
Q3UJD6;Q3UJD6-2	0	0	0	0	0	837.9	829.541	1074.95	0	0	0	0	0	0	0	530.209	0	0	0	0	516.708	427.517	338.209	366.823	0	0	0	0	251.077	505.797
Q3UJP5	0	0	0	0	0	0	710.211	358.765	0	0	0	0	0	0	0	487.626	0	0	0	0	2221.55	2227.82	2645.9	1739.54	0	0	0	0	925.796	899.7
Q3UJU9	0	0	0	0	3308.2	3318.01	4482.03	3436.82	0	0	0	0	2062.96	1059.17	1711.86	1600.38	0	0	0	0	3335.72	4170.25	4403.46	2750.2	1912.04	2221.82	1972.42	1805.5	2168.62	2508.85
Q3UKC1	0	0	0	0	1961.22	1503.58	1915.59	2133.71	0	0	0	0	1404.37	3406.57	0	1642.73	0	0	0	0	3474.91	3383.65	3823.86	3413.73	0	0	0	0	1787.91	2160.74
Q3ULJ0;Q3ULJ0-2	0	2858.82	10487	0	1711.39	1847.2	1507.47	1201.42	4423.2	4720.95	13309.1	0	2521.49	1763.07	5410.39	1466.95	0	3860.42	0	0	1901.99	2188.34	2058.5	6627.85	3201.11	1679.72	2938.07	1052.4	1604.99	1306.8
Q3UM45	0	0	2824.34	1943.03	2694.13	3548.61	4324.45	2428.62	0	1378.86	0	0	2830.09	2454.66	2442.34	2445.11	0	2188.23	0	0	6391.79	6630.23	8573.6	5037.88	447.088	1570.36	1240.23	0	2611	2931.61
Q3UMB5	0	27437.5	0	24249.6	2577.9	5770.34	5822.52	5975.36	25885	28802.5	0	0	5015.15	8188.83	6927.66	6176.32	29962.7	19858.2	0	0	7411.93	7293.46	8520.18	6319.1	30141.8	0	35120.1	12226.9	7740.92	7400.64
Q3UMR5	0	18819.3	0	13197.9	1199.18	5489.61	3972.1	1222.57	0	0	0	0	3033.71	7270.89	4428.68	2009.7	0	5736.73	0	0	1561.08	1595.09	1584.81	2353.42	4744.3	8655.45	6521.26	5883.46	2705.9	1840.76
Q3UMT1	0	0	0	0	0	418.64	245.324	332.93	0	0	0	0	0	0	0	0	0	0	0	0	479.307	498.672	459.994	353.796	0	0	0	0	311.374	193.68
Q3UN02	0	0	4979.63	0	0	453.462	0	429.488	0	0	3782.25	0	0	0	3007.82	875.998	0	1486.88	0	0	1538.97	1235.28	1314.64	4972.77	3435.15	0	0	0	2361.24	4192.97
Q3UNH4	0	0	0	0	12484.4	12972	14813.4	8875.02	0	0	0	0	3343.94	1196.14	2336.96	3460.25	0	0	0	0	1765.25	2219.75	2409.79	1387.54	1719.31	2697.66	2030.83	3387.98	1485.01	1674.96
Q3UNZ8	0	0	2787.67	0	0	0	0	0	0	0	2793.84	0	0	0	1049.1	672.028	0	0	0	0	219.883	168.245	0	1883.99	1015.53	0	0	0	392.717	87.812
Q3UPH1	0	0	0	0	0	397.381	971.838	395.859	0	0	0	0	0	0	0	142.702	0	0	1843.6	0	1737.82	2178.85	2767.51	1433.74	0	0	0	0	741.682	1067.75
Q3UPL0	26273.3	0	1986.14	0	5402.97	3866.63	4467.18	5839.32	0	20914.1	0	10217.4	2343.44	1789.43	2427.8	2389.31	0	0	0	38227.7	5032.35	4731.79	4669.57	4087.87	32809.5	0	0	13867.2	1642.56	2018.61
Q3UQ44	0	0	0	0	838.694	816.222	477.445	1334.65	0	0	0	0	0	0	0	0	0	0	0	0	0	0	0	0	0	0	0	0	0	0
Q3UR32	379561	37624.1	77872.4	35750.2	11098	15991.8	31697.1	23946.6	20246.6	12881.6	39069.1	71725.2	4238.73	9573.17	19085.1	11120.8	184079	39884.4	294834	177517	448.421	1838.54	10699.1	6059.19	31966.3	50359.8	14560.7	34093.8	5083.23	7238.7
Q3USB7	0	0	0	0	675.945	819.274	959.056	777.91	0	0	0	0	232.685	0	0	705.117	0	1649.43	0	0	524.572	510.095	546.574	319.225	0	0	0	0	154.91	377.322
Q3UTH8;Q3UTH8-2;Q3UTH8-3;Q3UTH8-4	0	0	0	0	7560.69	6098.22	6655.45	5851.78	0	0	0	0	1647.24	0	2203.99	3974.05	0	0	0	0	1527.46	2092.37	2033.22	1422.18	0	0	0	0	498.151	913.966
Q3UTZ3	0	0	0	0	4361	1965.53	1915.12	3712.82	0	0	0	0	1024.41	0	0	1859.08	0	0	0	0	2080.73	1780.47	1582.69	2330.8	0	0	0	0	1677.1	1399.86
Q3UU96;Q3UU96-2	0	0	0	0	1346.95	1012.45	561.477	1656.05	0	0	0	0	0	0	0	1135.77	135166	0	0	0	820.406	671.913	555.805	629.584	0	0	0	0	554.127	679.998
Q3UUF8	0	0	0	0	15355.1	14059	13785.1	15215.3	0	0	0	0	10979.7	9437.84	8973.45	8278.9	0	0	0	0	11255.7	12674	12709.8	9066.35	0	0	0	0	3879.32	5102.41
Q3UUG6;Q3UUG6-2	0	0	0	0	0	735.858	453.486	733.025	0	0	0	0	0	0	0	625.281	0	0	0	0	2400.33	1847.97	1882.26	1581.34	684.614	1213.07	756.219	0	2222.97	2023.04
Q3UUQ7	1848.02	0	0	2151.12	1293.68	1041.64	1573.36	1915.93	0	2619.5	0	0	844.729	0	0	1771.51	0	2538.97	0	0	563.23	429.603	502.021	473.602	10468.6	11791.1	10665.2	12905.8	2838.04	2931.4
Q3UVL4	0	0	0	0	2431.71	2359.59	3350.38	2547.42	0	2400.71	0	959.725	1731.1	2000.56	2287.79	2357.84	2662.88	2521.77	0	0	4460.82	3881.22	3565.48	3964.79	2439.82	2698.38	1702.84	1795.9	2470.11	2928.2
Q3UVX5	0	0	0	0	2234.28	1957.15	2050.12	2938.26	0	0	0	0	1121.74	0	0	1978.91	2018.08	1998.82	0	0	2374.95	2125.25	1577.34	1774.51	3476.52	3068.12	3072.78	2720.09	1461.48	1720.8
Q3UWA6;Q3UWA6-2	0	0	0	0	366.835	0	0	437.544	0	0	0	0	0	0	0	0	0	0	0	0	675.112	559.026	682.04	618.253	0	0	0	0	1	404.904
Q3UX10	7908.76	13672.8	9104.02	15021.9	52738.5	42124.4	46940.2	57617.2	19173.9	22999	14378.8	11751.8	32753.2	28840.9	22632.5	33868.1	14951.7	18360.7	0	0	28240.8	25075	22519.7	22069.2	12961.3	12434.2	10760	10557.9	15163.9	18549.2
Q3UYC0	0	0	0	0	0	442.84	2778.31	638.026	0	0	0	0	834.473	0	274.255	925.468	0	0	0	0	2620.31	2352.4	2500.78	1992.39	0	797.936	373.518	0	1623.82	1869.06
Q3UYG8	0	0	0	0	1003.44	936.767	1115.66	987.116	0	0	0	0	907.997	1189.3	803.713	830.892	0	0	0	0	2093.22	2150.46	2210.42	2082.18	0	0	0	0	883.866	1111.55
Q3UYH7	0	0	0	0	0	488.604	352.588	659.886	0	0	0	0	274.124	0	0	639.14	0	0	0	0	1250.41	1110.73	1217.86	1000.53	0	0	0	0	705.13	758
Q3V038	0	0	0	0	0	311.056	0	0	0	0	0	0	0	0	0	0	0	0	0	0	907.99	922.623	1266.14	708.169	0	0	0	0	789.97	675.573
Q3V1L4	0	0	0	0	1512.58	2102.91	2498.3	1989.18	0	0	0	0	3438.48	0	5999.13	1486.69	0	0	8234.38	0	1491.83	1634.94	1388.59	1174.94	0	0	0	0	1229.77	1245.76
Q3V1U8	730364	775202	405451	463485	79750.4	85217.2	60255.1	37421.3	1.18356e+06	482420	430643	611880	103387	299984	353675	68167.3	733344	175073	371187	2.11234e+06	9344.74	19681.2	16247.4	5562.59	98954.8	95197.1	66382.9	128383	11041.5	7003.35
Q3V300	0	0	0	0	0	0	0	0	0	0	0	0	0	0	0	0	0	0	12849.6	0	0	0	0	0	0	0	0	0	0	0
Q3V3Q7	0	0	0	0	588.76	945.687	1070.76	1253.34	0	0	0	0	991.966	698.098	0	1032.4	0	0	0	0	2009.54	1867.03	2098.65	1837.03	0	0	0	0	887.499	1122.14
Q3V3V9-2	0	0	0	0	857.029	492.324	457.796	322.468	0	0	0	0	1008.44	872.497	1113.93	536.714	0	0	0	0	2726.83	3603.51	3843.48	2466.22	0	0	0	0	1442.1	1652.13
Q4ACU6;Q4ACU6-11;Q4ACU6-3;Q4ACU6-7	0	0	0	0	4232.54	2963.33	3105.55	1848.45	0	0	0	0	901.839	0	0	909.085	0	0	0	0	445.469	791.012	646.094	389.954	1607.05	2039.72	2760.96	0	643.575	706.965
Q4FZG7;Q9WVA2	0	0	0	0	0	0	0	0	0	0	0	30541	16865.7	11796.5	9609.65	0	0	7386.09	0	0	0	0	0	0	0	0	0	0	0	0
Q4JIM5	0	0	0	0	370.608	2598.93	5942.82	2824.68	0	0	0	0	658.038	0	329.431	3135.77	0	0	0	0	1479.7	1833.8	1901.52	1319.94	0	10924.4	10216.8	0	1392.51	1244.7
Q4KMM3;Q4KMM3-2;Q4KMM3-3;Q4KMM3-4	0	0	0	0	1040.39	1714.09	2277.62	1616.78	0	0	0	0	1109.88	0	0	727.718	0	0	0	0	1273.64	1110.06	1498.33	1073.42	0	0	846.813	0	687.886	883.723
Q4KUS2	0	20557.3	0	0	1387.42	1560.33	1294.25	1292.97	0	0	0	2625.81	1312.5	1554.46	5579.67	1258.18	0	0	2973.72	17056.6	6842.65	5613.96	4842.32	5056.95	4125.07	1699.9	915.308	0	2986.83	3356.55
Q4QQM4	0	0	18279.4	0	0	0	0	0	0	0	12821	0	1947.77	0	2316.49	543.326	0	6577.15	0	0	276.537	0	286.038	10943.5	6751.18	0	2422.27	0	963.148	0
Q4V9Z5-2;Q4V9Z5-3	0	0	0	0	11752.2	12386.9	28272.8	9540	1448.08	0	0	0	1894.72	0	3007.82	3042.42	0	0	0	0	709.483	0	0	0	0	0	0	0	292.734	289.992
Q4VAA2;Q4VAA2-2	0	48634.8	0	0	4060.11	5704.92	5269.4	3417.8	19957.3	0	1314.88	19303.2	7839.39	11408.4	8658.96	6668.45	3099.64	10566.6	43722.4	33290.1	6853.76	10477.9	14718.4	8975.08	0	0	846.144	0	4364.73	3791.47
Q4VAE3	2822.3	0	53334.7	0	0	1263.69	885.694	0	5364.8	0	50912.4	4919.93	5015.83	1808	12534.3	1340.68	0	16249.1	0	0	1127.89	914.215	1001.3	34486.7	44356	6062.2	23252.6	4511.77	7634.15	1308.13
Q501J6	0	0	15221.9	0	10491.1	5728.32	14372.5	9485.45	0	0	0	0	2242.7	2669.69	5441.6	2391.2	0	1537.22	10616.3	0	695.095	837.286	797.372	578.534	0	0	0	1494.11	0	356.529
Q505B7	0	0	0	0	0	1461.66	682.272	1327.88	0	0	0	0	475.01	0	0	0	0	0	0	0	2272.72	2583.19	3062.34	1778.34	0	0	0	0	922.264	641.364
Q505F5	0	0	0	0	0	1154.82	819.053	1242.27	0	0	0	0	1189.22	0	0	865.859	0	0	0	0	1512.09	1418.78	1360.02	1226.08	0	0	0	0	950.835	1223.55
Q50L41	24408.4	51177.8	17470.5	32568.3	6054.78	9675.7	2415.17	6193.56	34711.7	44382	33280.8	19328.9	18511.3	22444.4	11773.2	9601.79	107245	68841	27659	104994	2588.87	1964.49	1030.37	1887.18	37430.4	43612.7	54659.7	25224.1	6282.57	4950.02
Q52KF3;Q52KF3-2;Q52KF3-3	0	0	0	0	1451.2	1409.37	1084.61	1519.76	0	0	0	0	844.073	0	354.067	710.062	0	0	0	0	2919.28	2697.11	2842.92	2615.85	486.049	0	592.708	0	1217.85	1519.69
Q52KI8;Q52KI8-2	23117.9	26325.7	18910.9	23738.7	5895.39	6223.68	5112.66	4492.05	30377.5	29749.3	18658.1	27172.3	8825.78	14905.6	22654.7	8812.79	24237.6	23322.3	62236.1	34307.8	2625.75	2626.7	4067.58	2352.6	11693.8	22924.1	8506.56	23871.9	3696.97	1444.69
Q52KR3	0	0	224.99	0	805.031	619.733	1339.89	784.075	0	0	0	0	754.228	395.753	1394.44	722.712	0	0	0	0	4651.34	4463.18	5180.92	4159.11	0	0	0	0	2013.56	2605.03
Q56A07	0	0	0	0	1524.24	900.578	5541.6	2088.69	0	0	0	0	1105.38	0	0	1272.59	0	0	0	0	2816.22	2120.22	2176.38	2343.2	1905.9	1644.83	1538.46	0	1472.11	1439.03
Q571K4	0	0	0	0	0	0	0	0	0	0	0	0	0	0	0	0	0	0	0	0	1170.62	955.753	1095.23	1044.28	0	0	0	0	435.468	628.123
Q58A65;Q58A65-2	0	0	0	2509.88	4183.98	4512.2	5378.04	4787.08	0	2548.55	0	0	3355.63	3041.92	2610.29	3230.72	0	2014.36	1561.39	0	4322.01	3002.26	3537.99	3256.89	1259.35	1717.95	1909.67	1245.69	2185.26	2459.42
Q5DQR4;Q5DQR4-2;Q5DQR4-3;Q5DQR4-4;Q5DQR4-5;Q5DQR4-6	0	0	0	0	525.339	574.719	456.481	1079.22	0	0	0	0	0	0	0	484.464	0	0	0	0	1063.68	1042.63	964.104	1068.76	0	0	0	0	807.094	738.481
Q5DTL9;Q5DTL9-2;Q5DTL9-3;Q5DTL9-4	6278.23	13142.9	7616.02	8475.28	5152.83	4262.7	5288.07	6712.74	10078.9	12651.8	10557.2	0	2388.59	6409.36	2469.38	3761.75	0	0	0	0	5477.01	3928.24	3004.6	3814.37	5459.24	5086.4	5530.26	4419.93	3841.78	4081.69
Q5EBG8	0	0	0	0	0	0	203.403	0	0	0	0	0	0	0	0	0	0	0	0	0	353.543	352.755	764.578	292.681	0	0	0	0	0	116.365
Q5EBJ4	0	0	0	0	0	3434.06	884.695	642.742	0	0	0	0	0	0	0	654.628	0	0	0	0	128.006	139.497	174.687	0	0	0	0	0	0	436.691
Q5EG47	0	0	0	0	1137.71	1381.62	1605.1	1888.96	0	0	0	0	932.777	891.703	425.647	683.484	0	0	0	2392.59	1974.56	1998.86	2169.01	1856.88	0	0	2460.41	3128.98	997.986	1024.18
Q5F285	0	0	36703.7	0	3545.93	6182.14	7722.97	2018.96	0	0	115378	0	5878.78	1544.3	9580.06	1414.32	0	32944.3	0	0	1911.29	2403.47	2361.86	21760.1	44127.7	8617.79	36032.4	3083.59	17145.3	1954.91
Q5F2E8	0	0	0	0	1757.79	1143.04	880.608	1278.58	0	0	0	0	825.299	0	1155.67	753.762	0	0	0	0	2126.37	2118.51	2529.41	1803.24	0	0	0	0	1041.8	1171.9
Q5FWK3	82753.7	87759.4	40363.1	77173.3	10151.4	10713.1	6244.92	5625.14	124890	84647.1	66159.4	117791	14171.8	58114.4	41780.5	7534.56	113415	89427.1	24606.1	169764	4073.31	4803.32	4026.25	3371.3	49830.9	33076.1	21498.7	26468.7	5285.88	4751.13
Q5GH67	0	0	0	0	0	0	0	0	0	0	0	0	0	0	0	0	0	0	0	0	1513.74	1355.37	1312.37	1163.8	0	669.58	930.706	0	1232.54	1368.86
Q5HZI9	0	0	0	0	0	0	0	0	0	0	1994.67	0	285.165	0	0	0	0	0	0	0	224.127	196.472	209.304	1523.18	1748.58	1326.66	1685.86	0	770.197	432.67
Q5KU39	0	0	0	0	1599.01	905.71	966.609	1708.69	0	0	0	0	435.327	0	0	866.789	0	0	0	0	477.552	326.35	327.864	321.874	0	0	0	0	266.386	0
Q5M8N0	0	0	0	0	2400	2515.85	2503.85	1905.06	0	0	0	0	3113.91	3562.21	2210.69	1944.28	3796.09	2664.78	0	3603.64	5175.27	6921.86	6057.3	3611.33	1657.72	1694.83	1769.95	1748.23	5400.18	6566.42
Q5PR73	0	0	0	0	2491.36	2353.93	2528.9	2011.86	0	0	0	2268.39	2261.58	0	0	1193.33	0	0	0	0	5652.72	5240.99	6234.74	4218.04	2940.14	0	0	0	3190.72	3685.85
Q5RJG7	0	0	0	0	0	239.001	0	353.324	0	0	0	0	0	0	0	0	0	0	0	0	412.021	447.506	491.46	411.149	0	0	0	0	246.454	425.215
Q5RJI5	0	0	0	0	1941.49	1433.07	1339.59	1477.04	0	0	0	0	2035.94	1765.44	1483.56	1534.36	0	0	0	0	3050.55	2649.94	2869.26	2315.44	0	0	0	0	2072.73	2278.23
Q5SP85;Q5SP85-2	0	0	0	0	0	400.254	303.342	358.927	0	0	0	0	351.213	0	0	0	0	0	0	0	1206.13	1154.06	1172.02	1070.81	0	0	0	0	598.44	635.081
Q5SQX6	10316.5	7871.33	4709.29	7490.28	7790.4	5964.13	3665.45	9394.5	9282.97	12286.4	5260.63	4771.66	5793.2	5451.62	5083.8	7990.61	12748.2	10632.3	9755.19	10963.7	16315.6	15732.3	11698.3	12776.2	8574.11	8254.42	8890.65	7914.3	12832.3	13727.5
Q5SRX1;Q5SRX1-2	0	0	0	1132.03	19238.4	23821.3	22283.7	17076.5	0	0	22142.8	0	12592	10764.3	10006.4	9836.33	0	2053.16	7322.72	10526.3	27022.9	30429.3	31086.6	23970.6	1614.81	1426.72	2046.57	1643.97	11772.7	11873.6
Q5SSH8	23740.6	21789.7	13675.4	22991	5645	3965	3078.83	2417.77	25999.2	28088.1	17612.9	24844	12754.9	11357.3	6292.72	7827.94	18896.7	15270.5	10042.5	24701.4	2346.33	1405.52	1325.41	1001.58	12376.4	17700.5	14179.7	14421.3	3280.79	2660.29
Q5SSL4	0	0	11023.7	0	4710.26	5759.67	4352.9	5186.51	0	0	9609.66	0	4414.81	3738.83	4460.87	5180.56	0	0	0	0	7428.33	6547.52	6624.29	5457.39	1696.52	1945.52	2246.41	1589.42	4108.74	4347.66
Q5SSM3;Q5SSM3-2;Q5SSM3-3	6834.15	16930.3	3831.73	5378.62	2641.04	2964.92	2673.35	4443.2	0	4188.91	0	0	3498.94	4388.6	4573.63	5829.27	17914	10993.2	9454.11	0	10443.1	9883.03	11619.5	8916.81	6635.73	4226.65	0	12954.4	3357.92	4387.25
Q5SV85;Q5SV85-2	8438.44	0	6492.63	9601.32	4789.87	5235.93	5352.19	4151.66	6863.99	5148.77	4992.73	9489.89	3748.02	3746.39	3766.77	2638.69	0	0	0	6274.78	7459.74	9508.37	9545.14	5581.62	0	2417.7	2254.07	7193.33	2886.12	3504.69
Q5SVL6	0	0	0	0	4077.3	5536.78	5128.89	4276.13	0	0	0	0	3365.94	3518.26	3251.64	2958.56	0	0	0	0	6785.09	7545.34	8037.77	5835.6	0	0	697.109	0	2935.54	3210.46
Q5SWP3	0	0	0	0	2471.4	1271.18	5986.4	2315.93	0	0	0	0	7383.82	0	0	7104.35	0	0	0	0	0	0	0	0	0	0	0	0	0	0
Q5SWU9	342164	615810	211269	436203	65300.6	36583.3	12588.3	67780.8	498849	799026	293286	254156	92052.3	97854.8	37948.1	177289	391870	375192	142018	182794	24174.4	13485.6	7020.48	13861	152067	186257	189114	173570	35123.3	28964.9
Q5SWU9-2	21908.3	24914.3	12871.7	15524.3	3573.49	1219.77	744.718	4928.09	20257.5	29937	18555	13736.5	5165.36	5294.93	878.607	6979.25	37065.1	26374	10221.2	0	2435.33	599.843	495.113	559.906	14379.2	10657	9825.36	15099.2	1830.56	1651.77
Q5SXY1;Q5SXY1-2;Q5SXY1-3	0	0	0	0	6751.86	6312.46	6258.67	7725.13	0	0	0	0	0	0	2058.25	3438.32	0	0	0	0	2163.78	2107.13	2234.17	1932.96	0	0	0	0	1205.49	1435.15
Q5U3K5	1237.34	0	1739.02	2344.81	1274.07	860.734	1351.63	1299.28	2357.24	2840.04	2101.87	2110.27	1254.87	1559.38	1518.05	817.977	0	1852.51	0	0	1767.18	1795.68	2027.43	1428.12	1460.63	1983.73	0	1614.33	1271.31	1464.66
Q5U405	1.79495e+06	745684	118829	1.16151e+06	387989	151555	109418	191581	1.17078e+06	979594	889022	1.20541e+06	237218	412109	105006	336342	815216	735338	534433	981551	16953.7	27673.6	74369.2	7287.57	89447.3	199040	54445.5	40065.9	23392.2	40068.1
Q5U419	0	0	830.837	0	0	0	0	0	0	0	0	0	0	0	0	0	0	0	0	0	0	0	0	1810.24	1000.91	0	0	0	120.095	0
Q5U680	0	0	812.419	0	0	0	0	0	0	0	0	0	0	0	0	0	0	0	0	0	0	288.32	0	1157.87	1955.78	0	184.878	0	151.162	210.759
Q5XG69	0	0	0	0	524.442	519.929	2387.54	1014.17	0	0	0	0	0	0	0	0	0	0	0	0	0	0	0	0	0	0	0	0	0	0
Q5XJV6	0	0	0	0	4066.45	3638.65	3028.46	4643.47	0	0	0	0	1019.67	0	0	1599.88	0	0	0	0	425.185	344.554	241.648	281.465	0	0	0	0	0	244.299
Q5XKN4	0	0	5145.08	0	0	249.547	1666.34	398.448	0	0	6020.85	0	1393.27	0	469.057	383	0	0	0	0	1116.57	606.879	183.11	10322.4	8791.98	7146.39	1420.35	5336.05	2142.47	1649.9
Q60597;Q60597-2;Q60597-3;Q60597-4	14957.5	23161.1	10241.9	20180.6	6622.54	5068.09	4142.78	6372.31	18896.1	23114.1	12094.9	12209.9	6159.23	6791.12	4497.7	7007.15	14426.9	16691.2	12154.4	10442.3	5550.06	4683.86	5466.32	4422.16	21487.8	27883.2	28113.9	24161.1	10087.7	8053.86
Q60598	2863.23	9604.59	3820.02	4529.8	40111.6	46197.2	41681.2	29737	6439.04	9254.78	6370.92	7366.25	20919.8	19764.9	24395.7	17626	6930.62	7917.5	11304.1	11776.2	51347.9	54912.6	72934.3	40482.4	3817.61	6147.58	5942.47	4821.91	15948.6	19113.7
Q60605;Q60605-2	0	0	41028.9	2984.87	5253.3	7011.47	11960.8	7025.91	0	0	14881.2	91699.7	44379.6	38407	51011.2	10203.3	22120.9	40621	50923.9	31212	4269.25	5241.09	6188.18	2879.52	2720.47	4662.22	0	8242.67	1946.32	2436.85
Q60613	0	0	0	0	0	0	0	0	0	0	0	0	0	0	0	0	0	0	0	0	1545.67	1606.68	1422.35	1859.99	828.458	0	0	0	596.079	559.596
Q60625	0	0	0	0	0	0	578.235	272.805	0	0	0	0	0	0	0	568.024	0	0	0	0	2225.08	3283.25	2915.23	1680.81	2180.96	2256.26	1655.62	2804.76	1406.89	1287.96
Q60631	0	0	0	0	3928.28	4825.51	6002.36	4011.26	0	0	0	3449.02	3035.88	1807.25	3045.07	1947.88	0	0	0	0	2576.94	2976.02	3431.26	2072.28	0	0	0	0	1498.14	1904.56
Q60634;Q60634-2;Q60634-3	0	0	5077.54	939.109	862.248	767.322	815.419	728.87	0	0	3304.5	0	1729.55	0	4165.93	877.464	0	1160.24	0	0	1462.95	1610.36	1446.36	3931.82	3004.83	1526.98	3716.43	904.984	2055.24	1643.45
Q60668;Q60668-3	0	0	5534.3	2261.12	13726.9	8086.15	29194.4	11456.8	0	0	2853.21	8073.25	4662.06	3303.53	7471.1	2733.78	2384.48	4034.53	8434.7	3869.21	1131.01	1264.85	1511.27	1056.28	0	0	0	0	0	499.439
Q60673	0	0	0	0	0	1115.86	272.438	1775.89	0	0	0	0	1031.88	706.587	0	820.835	0	0	0	0	1515.96	1206.35	974.476	832.267	0	0	485.709	0	472.588	1004.41
Q60676	2548.01	0	0	1319.28	3457.88	3668.33	3534.48	3877.98	0	1996.22	1518.98	0	2399.7	2659.54	1856.41	2667.51	0	3078.93	0	0	5359.93	4823.77	5489.34	3502.69	1597.93	5267.88	6111.8	4287.58	4068.19	4490.4
Q60692	19317.5	6468.3	12153.4	5722.06	2154.03	3433.33	3868.19	2240.62	3908.44	3279.75	5665.9	8521.21	2208.11	2322	2610.3	3558.63	12905.9	5691.14	77491.4	19160.6	949.207	1110.6	1439.63	1301.52	4089.81	4997.08	4417.16	8603.5	1134.89	1834.35
Q60715;Q60715-2	0	5089.26	0	2269.02	0	7073.8	0	554.696	0	3176.91	3869.37	0	489.211	267.085	0	3840.2	2038.66	2547.04	922.049	0	363.213	414.653	461.295	285.195	19681.7	26291.1	19150.2	22876.1	4771.18	3533.2
Q60737	0	0	0	0	7703.67	4642.36	4228.8	3668.77	0	0	0	0	0	0	0	1620.68	0	0	0	0	2013.91	2905.23	2323.97	1537.68	0	0	0	0	1436.65	1356.12
Q60749	0	0	0	3612.99	3434.37	1767.51	4487.89	2549.56	0	0	0	0	1584.18	1077.68	713.217	0	0	0	0	0	880.388	773.356	1067.25	603.39	0	0	0	0	525.073	539.839
Q60766;Q60766-2	0	0	0	0	0	424.982	1754.14	391.312	0	0	0	0	0	0	0	0	0	0	0	0	807.976	839.809	1462.31	472.503	0	0	0	0	294.831	531.01
Q60771	14570.8	17418.4	106740	16642	8686.28	8122.18	6233.73	6823.66	23450.9	24390	206691	10792.2	17668.8	8862.53	22690.1	10888.3	15423.2	63688.7	8144.78	11452.2	13754	11719.6	10323.6	101367	152326	21283.9	72371.3	15258.6	31331.8	9083.22
Q60790	0	0	0	0	1488.63	1325.94	1055.73	1339.87	0	0	0	0	0	0	0	647.62	0	0	0	0	0	0	0	0	0	0	0	0	0	0
Q60803	0	0	0	0	4493.75	5402.23	6271.02	3226.59	0	0	0	0	1658.6	0	0	1272.65	0	0	0	0	621.321	577.001	482.811	280.342	0	0	482.207	0	793.366	673.823
Q60829	5114.08	4276.1	2865.23	4427.93	2329.69	1543.23	1993.41	786.366	4603.41	0	5384.51	4342.53	1844.82	2742	1684.22	2430.45	24434.9	19295.7	17579.7	32295.4	4596.59	3709.69	3834.95	3186.48	5651.19	5660.15	4172.41	6165.48	1732.55	1505.79
Q60838	0	0	0	0	0	0	0	251.32	0	0	0	0	0	0	0	500.38	0	0	0	0	224.669	214.251	309.386	214.499	0	0	0	0	90.3543	133.192
Q60854	7338.51	0	2231.35	0	1480.81	966.968	1099.29	977.322	0	0	0	0	678.61	0	980.341	338.64	0	0	13681	0	4099.55	3874.76	3804.76	3816.56	863.562	0	0	1204.08	2174.22	2578.94
Q60864	19484.4	16678.7	8705.13	12810.3	25635.8	34264.8	39871.2	30476.1	9967.12	8191.46	7594.64	12293.3	14397.1	11960.2	10550.8	14600.6	9372.49	8731.58	11854.1	36043.1	16631	20757.7	19585	15695.4	5243.19	4055.64	4535.6	3657.85	10967	13071.6
Q60865	19707.3	23541.1	13911.3	0	14760.3	7587.56	11325.9	15034.9	0	60237.9	6601.06	21543.9	11154.1	8471.29	129632	4451.59	6241.16	10398.1	16310.9	0	1607.25	1905.32	2074.32	1085.94	2546.72	17912.1	6626.36	8612	1045.19	1170.2
Q60870	3266.81	0	17245.9	1864.93	2440.77	1255.31	2623.37	2100.83	5198.37	2935.15	18272.1	0	3004.4	1693.66	5306.86	1336.71	2156.89	6135.07	0	3193.78	1536.5	1438.06	1595.65	8304.35	4274.99	2603.9	5247.87	2092.33	1377.69	1036.84
Q60899	27421.1	0	71879.5	36121.9	24966.9	19715.1	34711.1	18410.7	77741.8	49316.8	0	0	42482.4	65984	103406	6660.34	87106.9	151948	0	0	2756.96	2964.83	4107.39	2191.33	41233.1	36182	51942.3	15613.7	2443.78	1662.78
Q60900;Q60900-2	0	0	0	0	0	0	1507.88	298.069	0	0	0	0	0	0	0	0	0	0	0	0	0	0	0	0	0	0	0	0	0	0
Q60902	0	0	3214.12	0	11138.6	13623.6	13865.5	9579.58	0	1205.57	2390.19	4124.39	5205.88	4020.51	4037.9	5390.24	4025.99	2904.29	0	0	8964.1	9514.04	10685.1	7009.32	14682.3	6430.44	1022.89	0	4458.19	4970.26
Q60930	64024.3	63249.4	44735.8	60530.5	76116.4	98465.2	133331	80172.4	62179	67473.6	47877	57702	52017.9	48806.6	40149	55636.3	60093.4	53948.1	229427	66777.9	78866.4	91166.3	107536	64486.8	117284	145156	149405	119163	87719.1	97756
Q60931	18857.7	23095.2	12193.3	20000.4	17347.8	19735.6	32107.4	16963.1	26452.9	20883.3	11104.8	17942.7	10447.6	6906.69	14075.2	13250.9	19398.9	16225.2	24526.1	22442	11059.4	12183.1	15562.1	8597.2	22422.2	30969.8	28242.5	25098.9	15476.7	17368.6
Q60932-2	28329.3	30071.1	31938.9	32844.9	23049.4	31640.7	40430.7	22202.3	36456	32699	33186.4	38070.8	19299.1	20501.8	26209.5	21601.4	45403	35152.4	178078	49909	32671.6	35262.2	39300.1	25563.5	50581.2	44338.4	47380.3	66233.3	34767.7	32062.4
Q60960	0	0	1997.12	0	2121	1455.06	1728.63	1754.76	0	0	0	0	1935.07	0	663.791	1179.08	0	0	0	0	1155.07	1204.32	950.035	1007.51	0	0	1631.77	0	683.232	762.032
Q60996;Q60996-2;Q60996-3;Q60996-4	0	0	0	841.966	4558.26	3779.67	12425.2	16671.5	0	14455.8	0	0	1178.35	22357.1	1359.25	20224.4	0	3820.53	0	0	4098.45	7427.78	9957.72	13612.6	523.163	667.03	11645.1	0	5968.46	4371.83
Q60997;Q60997-2;Q60997-3;Q60997-4	0	0	10571.9	0	350.669	5481.39	0	23459.4	0	0	0	0	0	0	209123	0	2542	1495.36	0	0	164.441	173.054	0	0	1391.31	5173.88	0	10857.6	155.83	0
Q61016	0	0	0	0	0	0	1088.13	548.04	0	0	6677.28	0	1088.92	0	0	0	0	8445.09	0	0	2174.1	2583.06	4889.92	18260.2	7687.55	0	6971.3	0	0	0
Q61024	1143.2	0	1483.88	2868.8	15839.5	13527	13755.3	15019.2	2728.43	3285.93	1404.9	1721.4	6161.06	3401.3	4059.56	6188.13	1745.97	1481.74	0	0	1016.7	946.948	788.179	638.552	0	0	331.861	0	522.351	685.336
Q61029;Q61029-2;Q61029-3;Q61029-4;Q61033;Q61033-2	0	0	0	0	1449.54	1610.14	3289.34	1193.54	0	0	5224.1	8904.39	3724.74	4012.29	5578.92	1830.18	4899.54	6940.81	5811.8	10936.5	497.929	664.279	753.252	377.43	910.173	0	0	0	294.29	499.717
Q61035	62886.3	5885.59	11626.7	7530.03	4529.95	4780.88	6591.98	6117.36	0	2581.59	3422.73	14770.9	2938.61	3940.84	5726.2	4145.86	14356.8	7959.12	50576.3	27574	1190.97	1761.73	2939.52	1014.99	6060.23	6862.31	4051.43	10699.4	3384.72	2622.56
Q61036;Q61036-2	0	0	0	0	1969.78	2295.78	2221.19	2146.45	0	0	0	0	2775.36	2446.57	1707.65	2061.52	0	0	0	0	5715.33	6637.86	6284.91	5020.46	473.735	0	0	0	3203.08	3684.84
Q61037;Q61037-2;Q61037-3;Q61037-4;Q61037-5;Q61037-6	0	0	0	1774.87	798.851	589.417	452.223	1189.68	0	0	0	0	784.268	725.473	349.025	1150.38	0	0	0	0	1777.85	1735.29	1318.51	1383.81	0	0	417.511	0	1103	1334.69
Q61081	0	0	0	0	10065.1	13176.8	16247.9	10819.8	0	1815.13	0	0	5562.15	4476.73	6839.87	5221.62	0	0	25009.8	0	6853.28	7035.58	7991.12	5536.37	4346.09	1098.29	0	0	2829.68	4528.3
Q61102	0	12518.3	7238.23	3491.47	1086.62	1022.25	975.871	654.492	4080.29	5966.85	2947.9	3341.87	1844.52	3224.9	1773.96	1517.91	4243.82	3174.13	2701.03	4916.71	1340.74	981.526	1104.02	2422.79	6724.69	9802.01	9067.82	7579.03	3067.44	2670.05
Q61137;Q61137-2	0	0	0	0	1232.72	1220.26	28115.7	1416.81	0	0	0	0	742.807	0	0	877.908	0	0	0	0	1798.95	1831.59	2090.69	1630.79	1330.39	1441.67	1161.93	0	2661.54	1282.06
Q61140	0	0	0	0	1831.53	2362.86	1850.85	1699.85	0	0	0	0	1879.81	2101.2	2156.29	2128.01	0	0	0	0	6848.29	5982.39	7417.78	4721.93	0	0	0	0	2551.54	2962.64
Q61143	0	0	29564.4	26238.9	2982.81	1688.01	3954.96	4164.72	0	0	14763.1	27822.2	441.649	9539.93	5119.96	2158.89	0	0	0	0	449.826	1466.53	1793.23	1722.7	0	17129.4	3845.39	0	10928.7	2653.64
Q61151	24387.5	33910.2	1018.01	11411.2	6235.53	6376.94	7198.24	7036.8	28670.4	20130.2	1024.54	19772.3	5353.31	6821.28	3049.15	5618.24	23579.8	21967.6	24206.3	24817.8	6716.98	7054.15	6477.5	5485.26	1495.53	19480.4	12072.8	19976.3	5522.31	5542.78
Q61165	0	0	1604.01	0	1430.41	1517.24	1594.73	1197.5	0	0	0	0	2464.73	0	4697.57	1335.1	0	0	0	0	3484.34	2602.83	1996.8	2820.44	2431.47	1778.17	2452.54	2369.89	2432.39	2467.73
Q61166	0	9091.73	1146.79	0	6482.9	7310.46	9388.21	4732.37	0	0	0	5443.68	8281.17	7750.78	10664.4	5048.8	3946.33	6795.38	0	0	4483.5	6020.4	7325.21	3614.4	0	0	946.186	0	2550.68	2832.4
Q61171	157014	150322	116810	120235	49613.3	43661.1	46978.6	37063.9	140188	266788	16277.1	102726	54556.7	56015	49263.7	34168.7	107398	37102.6	273636	134028	61426.4	80659.1	99084.1	56161.4	108461	27483	6861.04	18110	20215.2	24995.4
Q61176	528126	37705.5	78156.8	77492.1	9930.42	18902.9	22721.7	19294.6	43727	15422.1	56599	105334	7192.48	19702.7	34057	23460.5	79868.2	64844.2	714234	212134	1434.55	3716.54	10058.9	9021.85	39924.3	37443.5	13209.4	52165.7	8563.67	13647.5
Q61187	0	0	0	19747	5289.56	5710	8201.32	5827.74	0	0	0	0	3979.9	4804.9	2924.46	4135.62	0	0	1520.7	0	6159.14	6576.93	9462.66	5533.73	16125.5	7888.96	5768.25	15725.6	2920.91	3310.1
Q61189	0	0	0	0	3240.87	3793.83	5915.84	2576.39	0	0	0	0	3617	2611.15	3698.35	1789.03	0	0	0	0	3018.86	4502.27	5217.82	2486.26	0	0	0	0	863.423	1335.29
Q61191	0	0	0	0	256.727	0	0	0	0	0	0	0	0	0	0	0	0	0	0	0	156.124	193.31	206.654	0	0	0	0	0	0	1
Q61205	0	0	2671.75	0	0	3742.98	5099.98	2862.07	0	0	0	2704.84	2366.76	1779.27	2118.7	1637.27	0	0	0	0	2804.34	3324.92	3304.28	2254.21	0	0	0	0	1919.2	3131.07
Q61206	6769.5	9506.8	13126.8	7469.1	8194.47	7773.94	11389.4	7187.69	7323.39	7242.54	7408.24	16366.6	8505.01	7108.42	10342.6	4934.93	4570.51	6366.38	12445.2	0	6252.62	7629.12	8372.24	6524.74	3877.99	4268.23	4938.53	4801.63	6197.36	7782.07
Q61207	0	11381.8	3965.49	9662.93	0	987.764	1367.38	925.589	0	8600.71	8241.61	12958.6	4124.5	4377.01	2831.91	2383.95	8276.65	6847.86	0	10107.7	564.963	584.26	417.297	235.297	23979.5	35756.2	28893.8	26056.1	5615.95	4754.66
Q61214;Q9Z188;Q9Z188-2;Q9Z188-3	0	0	0	0	0	747.007	0	0	0	0	0	0	0	0	0	0	0	0	0	0	1280.06	1102	1040.61	980.529	0	0	0	0	447.84	536.18
Q61233	1727.24	0	2335.69	0	0	438.876	632.236	1522.83	0	0	19261.6	12416.6	3800.69	2969.27	15418.1	2155.38	0	3626.59	7488.81	0	618.998	723.923	725.573	763.774	1057.77	1886.69	610.937	6020	634.173	755.118
Q61249	0	0	0	0	1747.67	2363.9	2080.12	1478.13	0	0	0	0	2087.56	2340.12	1883.19	1450.63	0	0	0	0	3748.14	4597.26	5292.35	3603.83	0	0	696.585	0	1583.12	1992.84
Q61282	0	0	0	0	2404.51	0	3461.21	884.829	0	0	0	0	0	0	0	0	0	0	0	0	263.712	755.321	171.766	194.416	0	0	0	0	0	0
Q61290	0	0	0	0	3359.26	2220.52	967.358	3793.81	0	0	0	0	2608.39	1058.69	605.449	3071.13	0	1897.08	0	0	7758.47	6033.41	6040.43	5660.67	5386.3	4528.24	4597.21	4159.9	4222.37	4825.26
Q61301;Q61301-2	0	0	3505.43	2747.87	9407.07	9592.12	10117.9	11779.6	0	2558.41	1724.84	0	4624.51	5147.53	2517.06	6324.92	0	466.291	0	0	11069	11538.3	8776.51	8748.75	4831.85	6034.74	4573.32	9024.06	5318.45	6832.12
[truncated: 1,673 more rows]

## Sheet: APEX2_PeptidesMeta
ProteinAccessions	Genes	ProteinDescriptions	ProteinNames	PrecursorId
[truncated: 32,970 more rows]

[truncated: 6 more sheets: APEX2_PeptidesLFQ, Bulk_SampleInfo, Bulk_ProteinsMeta, Bulk_ProteinsLFQ, Bulk_PeptidesMeta, Bulk_PeptidesLFQ]
