# Supplementary material for: Subcellular proteomics of dopamine neurons in the mouse brain
Source: eLife. 2022 Jan 31;11:e70921. doi: 10.7554/eLife.70921 (PMC8860448; doi:10.7554/eLife.70921)
Supplement: Figure 2—source data 3. — (1) Striatum bulk tissue vs. ventral midbrain (VM) bulk tissue. (2) Acute vs. rested bulk tissue. [file elife-70921-fig2-data3.xlsx]

## Sheet: Bulk_VM_v_Str
ProteinAccessions	Genes	ProteinDescriptions	ProteinNames	Log2FC	pvalue	qvalue	Expr
Q5M8N0	Cnrip1	CB1 cannabinoid receptor-interacting protein 1	CNRP1_MOUSE	0.968975	1.08961e-09	5.2982e-06	0.000390514
P12657	Chrm1	Muscarinic acetylcholine receptor M1	ACM1_MOUSE	4.42979	1.85934e-09	5.2982e-06	2.6061e-05
Q3UHL1	Camkv	CaM kinase-like vesicle-associated protein	CAMKV_MOUSE	2.54699	8.21283e-09	1.26018e-05	0.000394838
Q9JKB3	Ybx3	Y-box-binding protein 3	YBOX3_MOUSE	-0.889849	1.07097e-08	1.26018e-05	5.82426e-06
Q9QZC2	Plxnc1	Plexin-C1	PLXC1_MOUSE	1.83837	1.40941e-08	1.26018e-05	6.05916e-05
Q3UMR5	Mcu	Calcium uniporter protein, mitochondrial	MCU_MOUSE	1.51224	1.53785e-08	1.26018e-05	0.000170988
Q9Z0Z4	Heph	Hephaestin	HEPH_MOUSE	-2.06981	1.54787e-08	1.26018e-05	7.11281e-06
Q9QYS9	Qki	Protein quaking	QKI_MOUSE	-0.821386	2.16672e-08	1.4197e-05	6.33266e-05
Q8BH44	Coro2b	Coronin-2B	COR2B_MOUSE	0.97261	2.44608e-08	1.4197e-05	9.86334e-05
P28652	Camk2b	Calcium/calmodulin-dependent protein kinase type II subunit beta	KCC2B_MOUSE	1.16835	2.49113e-08	1.4197e-05	0.00187533
Q3TXX4	Slc17a7	Vesicular glutamate transporter 1	VGLU1_MOUSE	3.01276	3.37118e-08	1.73924e-05	0.000364851
Q8C437	Pex5l	PEX5-related protein	PEX5R_MOUSE	-1.26888	3.77933e-08	1.73924e-05	8.72188e-05
D3YVF0	Akap5	A-kinase anchor protein 5	AKAP5_MOUSE	4.81575	3.96737e-08	1.73924e-05	0.000219014
Q8BQU6,Q80XF7	Gjc2	Gap junction gamma-2 protein	CXG2_MOUSE,CXG2_RAT	-2.26025	4.54931e-08	1.8519e-05	1.43638e-05
P19246	Nefh	Neurofilament heavy polypeptide	NFH_MOUSE	-2.09438	6.67417e-08	2.53207e-05	0.0010565
P56392	Cox7a1	Cytochrome c oxidase subunit 7A1, mitochondrial	CX7A1_MOUSE	-1.71123	7.24122e-08	2.53207e-05	3.17121e-05
Q80ZX8	Spag1	Sperm-associated antigen 1	SPAG1_MOUSE	-1.72337	7.64952e-08	2.53207e-05	1.02548e-05
Q9EQK5	Mvp	Major vault protein	MVP_MOUSE	1.69457	7.9974e-08	2.53207e-05	6.91734e-05
Q8BXT1	Rgs8	Regulator of G-protein signaling 8	RGS8_MOUSE	4.10342	9.80135e-08	2.93989e-05	2.09925e-05
P46735	Myo1b	Unconventional myosin-Ib	MYO1B_MOUSE	2.34838	1.04337e-07	2.9731e-05	1.59403e-05
O54946	Dnajb6	DnaJ homolog subfamily B member 6	DNJB6_MOUSE	1.01777	1.26897e-07	3.29666e-05	5.55107e-05
Q3U7R1	Esyt1	Extended synaptotagmin-1	ESYT1_MOUSE	-1.93707	1.27262e-07	3.29666e-05	2.36506e-05
Q14BI2	Grm2	Metabotropic glutamate receptor 2	GRM2_MOUSE	1.95687	1.33814e-07	3.31568e-05	0.000114053
Q99PU5	Acsbg1	Long-chain-fatty-acid--CoA ligase ACSBG1	ACBG1_MOUSE	-0.9263	1.86393e-07	4.14071e-05	0.000255579
Q61330	Cntn2	Contactin-2	CNTN2_MOUSE	-1.19621	1.99208e-07	4.14071e-05	0.000162528
Q6Q477	Atp2b4	Plasma membrane calcium-transporting ATPase 4	AT2B4_MOUSE	1.48062	2.01493e-07	4.14071e-05	0.000375613
Q9CXS4	Cenpv	Centromere protein V	CENPV_MOUSE	1.17366	2.01805e-07	4.14071e-05	0.000103911
P06151	Ldha	L-lactate dehydrogenase A chain	LDHA_MOUSE	0.783617	2.03439e-07	4.14071e-05	0.0013243
P39087	Grik2	Glutamate receptor ionotropic, kainate 2	GRIK2_MOUSE	1.65873	2.52988e-07	4.93866e-05	1.55018e-05
P52196	Tst	Thiosulfate sulfurtransferase	THTR_MOUSE	-0.893535	2.59975e-07	4.93866e-05	0.000228315
Q8K406	Lgi3	Leucine-rich repeat LGI family member 3	LGI3_MOUSE	-2.15294	2.70492e-07	4.97269e-05	0.000132501
Q8VD66	Abhd4	(Lyso)-N-acylphosphatidylethanolamine lipase	ABHD4_MOUSE	-0.813212	2.93757e-07	5.13234e-05	2.09454e-05
O08529	Capn2	Calpain-2 catalytic subunit	CAN2_MOUSE	-0.711351	2.97188e-07	5.13234e-05	0.000239979
P70290	Mpp1	55 kDa erythrocyte membrane protein	EM55_MOUSE	-0.680711	3.36418e-07	5.37179e-05	8.51758e-05
B0V2N1	Ptprs	Receptor-type tyrosine-protein phosphatase S	PTPRS_MOUSE	1.28629	3.36879e-07	5.37179e-05	6.51459e-05
Q60613	Adora2a	Adenosine receptor A2a	AA2AR_MOUSE	7.63576	3.40228e-07	5.37179e-05	6.71828e-06
Q9ET22	Dpp7	Dipeptidyl peptidase 2	DPP2_MOUSE	-1.0164	3.57804e-07	5.37179e-05	1.50858e-05
P31650	Slc6a11	Sodium- and chloride-dependent GABA transporter 3	S6A11_MOUSE	-2.25832	3.71036e-07	5.37179e-05	0.00146184
Q9JJV5	Cacng3	Voltage-dependent calcium channel gamma-3 subunit	CCG3_MOUSE	2.90068	3.85767e-07	5.37179e-05	3.59971e-05
Q9D1T0	Lingo1	Leucine-rich repeat and immunoglobulin-like domain-containing nogo receptor-interacting protein 1	LIGO1_MOUSE	1.66671	3.88693e-07	5.37179e-05	0.00010078
P24288	Bcat1	Branched-chain-amino-acid aminotransferase, cytosolic	BCAT1_MOUSE	-1.16865	3.89491e-07	5.37179e-05	0.000203997
Q8R071	Itpka	Inositol-trisphosphate 3-kinase A	IP3KA_MOUSE	2.87934	3.97875e-07	5.37179e-05	4.86827e-05
O88998	Olfm1	Noelin	NOE1_MOUSE	2.17732	4.05311e-07	5.37179e-05	0.000114588
P34914	Ephx2	Bifunctional epoxide hydrolase 2	HYES_MOUSE	1.06338	4.27318e-07	5.41818e-05	5.4701e-05
P32211	Chrm4	Muscarinic acetylcholine receptor M4	ACM4_MOUSE	4.10805	4.27826e-07	5.41818e-05	2.15534e-05
Q9JHR9	Nrip2	Nuclear receptor-interacting protein 2	NRIP2_MOUSE	-1.38125	4.58189e-07	5.60203e-05	4.47786e-05
P52194	Clgn	Calmegin	CLGN_MOUSE	-1.86644	4.79184e-07	5.60203e-05	4.21779e-06
Q9Z2Y3	Homer1	Homer protein homolog 1	HOME1_MOUSE	2.51632	4.99603e-07	5.60203e-05	0.000151554
Q8BRK8,Q09137	Prkaa2	5'-AMP-activated protein kinase catalytic subunit alpha-2	AAPK2_MOUSE,AAPK2_RAT	1.11027	5.00419e-07	5.60203e-05	1.33593e-05
Q9CTY5	Micu3	Calcium uptake protein 3, mitochondrial	MICU3_MOUSE	0.988547	5.05005e-07	5.60203e-05	4.70725e-05
P63328	Ppp3ca	Serine/threonine-protein phosphatase 2B catalytic subunit alpha isoform	PP2BA_MOUSE	0.840002	5.24157e-07	5.60203e-05	0.00188707
Q8CFI5	Pars2	Probable proline--tRNA ligase, mitochondrial	SYPM_MOUSE	1.2485	5.3311e-07	5.60203e-05	1.29617e-05
Q2PFD7	Psd3	PH and SEC7 domain-containing protein 3	PSD3_MOUSE	1.55001	5.35649e-07	5.60203e-05	0.000113195
O89053	Coro1a	Coronin-1A	COR1A_MOUSE	1.01037	5.5009e-07	5.60203e-05	0.000326302
Q61282	Acan	Aggrecan core protein	PGCA_MOUSE	-1.32149	5.67917e-07	5.60203e-05	0.000145881
Q9CYT6	Cap2	Adenylyl cyclase-associated protein 2	CAP2_MOUSE	0.668433	5.76077e-07	5.60203e-05	0.000389211
Q8R0S4	Cacnb4	Voltage-dependent L-type calcium channel subunit beta-4	CACB4_MOUSE	0.755979	5.89047e-07	5.60203e-05	6.52322e-05
P14231	Atp1b2	Sodium/potassium-transporting ATPase subunit beta-2	AT1B2_MOUSE	-1.42097	6.01982e-07	5.60203e-05	0.00129306
P17427	Ap2a2	AP-2 complex subunit alpha-2	AP2A2_MOUSE	0.827401	6.04198e-07	5.60203e-05	0.000643858
Q2TPA8	Hsdl2	Hydroxysteroid dehydrogenase-like protein 2	HSDL2_MOUSE	-1.00033	6.1143e-07	5.60203e-05	5.5418e-05
P46097	Syt2	Synaptotagmin-2	SYT2_MOUSE	-2.66071	6.12134e-07	5.60203e-05	0.000274991
O54828,P49805	Rgs9	Regulator of G-protein signaling 9	RGS9_MOUSE,RGS9_RAT	2.6223	6.16124e-07	5.60203e-05	5.54452e-05
Q5FWH7	Slc39a12	Zinc transporter ZIP12	S39AC_MOUSE	-1.26129	6.1928e-07	5.60203e-05	3.62335e-05
Q64018	Glra1	Glycine receptor subunit alpha-1	GLRA1_MOUSE	-4.70145	6.41489e-07	5.71226e-05	1.34341e-05
Q8VHQ9	Acot11	Acyl-coenzyme A thioesterase 11	ACO11_MOUSE	-0.855419	6.65059e-07	5.83103e-05	7.50128e-05
Q80WM4	Hapln4	Hyaluronan and proteoglycan link protein 4	HPLN4_MOUSE	-1.35889	6.77017e-07	5.84594e-05	9.29388e-05
Q8CFV4	Nrn1	Neuritin	NRN1_MOUSE	1.90154	7.30604e-07	6.2145e-05	5.232e-05
P05063	Aldoc	Fructose-bisphosphate aldolase C	ALDOC_MOUSE	-0.940376	7.42834e-07	6.2256e-05	0.00186186
P06801	Me1	NADP-dependent malic enzyme	MAOX_MOUSE	-0.458664	7.69326e-07	6.35419e-05	0.000106568
A2ARS0	Ankrd63	Ankyrin repeat domain-containing protein 63	ANR63_MOUSE	3.46363	7.87197e-07	6.40891e-05	0.00016453
P70182	Pip5k1a	Phosphatidylinositol 4-phosphate 5-kinase type-1 alpha	PI51A_MOUSE	0.689219	8.09519e-07	6.49781e-05	0.000138323
Q91V61	Sfxn3	Sideroflexin-3	SFXN3_MOUSE	0.928804	8.55802e-07	6.77391e-05	0.000991123
Q62188	Dpysl3	Dihydropyrimidinase-related protein 3	DPYL3_MOUSE	-0.659281	8.87545e-07	6.88797e-05	0.000503934
Q9Z1W9	Stk39	STE20/SPS1-related proline-alanine-rich protein kinase	STK39_MOUSE	-0.659896	8.94385e-07	6.88797e-05	0.000151506
P43006	Slc1a2	Excitatory amino acid transporter 2	EAA2_MOUSE	0.771755	9.23146e-07	7.01468e-05	0.00189809
Q9ERZ4	Chrm2	Muscarinic acetylcholine receptor M2	ACM2_MOUSE	-1.0124	9.41849e-07	7.01484e-05	3.0924e-06
Q9D6G9	Cmtm5	CKLF-like MARVEL transmembrane domain-containing protein 5	CKLF5_MOUSE	-1.0569	9.47786e-07	7.01484e-05	9.44639e-05
P56389	Cda	Cytidine deaminase	CDD_MOUSE	-1.19799	9.80127e-07	7.16121e-05	2.00049e-05
Q9DAM7	Tmem263	Transmembrane protein 263	TM263_MOUSE	0.481284	1.0318e-06	7.4433e-05	3.57434e-05
Q8C754	Vps52	Vacuolar protein sorting-associated protein 52 homolog	VPS52_MOUSE	0.477094	1.09111e-06	7.74636e-05	3.41569e-05
Q9Z1B3	Plcb1	1-phosphatidylinositol 4,5-bisphosphate phosphodiesterase beta-1	PLCB1_MOUSE	1.11419	1.10099e-06	7.74636e-05	0.000190341
P15388	Kcnc1	Potassium voltage-gated channel subfamily C member 1	KCNC1_MOUSE	-1.80303	1.13423e-06	7.88288e-05	3.03309e-05
Q9JLM8	Dclk1	Serine/threonine-protein kinase DCLK1	DCLK1_MOUSE	0.837004	1.15356e-06	7.92065e-05	0.000170792
P11404	Fabp3	Fatty acid-binding protein, heart	FABPH_MOUSE	0.694991	1.19033e-06	7.9812e-05	0.000542945
Q99K51	Pls3	Plastin-3	PLST_MOUSE	-0.926298	1.19039e-06	7.9812e-05	0.000122479
P31324	Prkar2b	cAMP-dependent protein kinase type II-beta regulatory subunit	KAP3_MOUSE	1.78478	1.23721e-06	8.11172e-05	0.000359237
P14873	Map1b	Microtubule-associated protein 1B	MAP1B_MOUSE	-0.476022	1.25982e-06	8.11172e-05	0.000657169
Q6PDY2	Ado	2-aminoethanethiol dioxygenase	AEDO_MOUSE	-0.405515	1.25986e-06	8.11172e-05	0.000112177
P34152	Ptk2	Focal adhesion kinase 1	FAK1_MOUSE	1.06991	1.26679e-06	8.11172e-05	4.82144e-05
P48036	Anxa5	Annexin A5	ANXA5_MOUSE	-1.20087	1.29454e-06	8.18333e-05	0.000559444
Q9R111	Gda	Guanine deaminase	GUAD_MOUSE	1.2041	1.30669e-06	8.18333e-05	0.000616106
Q8C1B7	Septin11	Septin-11	SEP11_MOUSE	0.896095	1.42462e-06	8.8249e-05	0.000351154
O70433	Fhl2	Four and a half LIM domains protein 2	FHL2_MOUSE	1.1219	1.45131e-06	8.89354e-05	4.24172e-06
Q9Z280	Pld1	Phospholipase D1	PLD1_MOUSE	-1.24981	1.50576e-06	9.12906e-05	9.43087e-06
P97445	Cacna1a	Voltage-dependent P/Q-type calcium channel subunit alpha-1A	CAC1A_MOUSE	0.902036	1.5471e-06	9.20253e-05	5.32304e-05
P48453	Ppp3cb	Serine/threonine-protein phosphatase 2B catalytic subunit beta isoform	PP2BB_MOUSE	0.77098	1.55017e-06	9.20253e-05	0.00138463
Q99PJ0	Ntm	Neurotrimin	NTRI_MOUSE	0.666383	1.56787e-06	9.21164e-05	0.000782289
Q6PHZ2	Camk2d	Calcium/calmodulin-dependent protein kinase type II subunit delta	KCC2D_MOUSE	1.25849	1.64259e-06	9.55218e-05	0.000274026
Q641P0	Actr3b	Actin-related protein 3B	ARP3B_MOUSE	1.19263	1.66192e-06	9.56698e-05	0.000145754
Q5DTT2	Psd	PH and SEC7 domain-containing protein 1	PSD1_MOUSE	3.11964	1.68056e-06	9.57749e-05	1.82279e-05
Q61701	Elavl4	ELAV-like protein 4	ELAV4_MOUSE	-1.8022	1.71667e-06	9.68642e-05	1.84632e-05
O88343	Slc4a4	Electrogenic sodium bicarbonate cotransporter 1	S4A4_MOUSE	-1.29707	1.76196e-06	9.8445e-05	0.000700197
Q0KL02	Trio	Triple functional domain protein	TRIO_MOUSE	0.869228	1.79691e-06	9.94235e-05	4.04949e-05
Q9JJ59	Abcb9	ATP-binding cassette sub-family B member 9	ABCB9_MOUSE	-1.24877	1.8278e-06	0.00010016	3.29359e-05
Q8VDM6	Hnrnpul1	Heterogeneous nuclear ribonucleoprotein U-like protein 1	HNRL1_MOUSE	0.497755	1.93083e-06	0.000104798	3.33912e-05
Q80TY0	Fnbp1	Formin-binding protein 1	FNBP1_MOUSE	-0.692256	1.96313e-06	0.000105546	7.77146e-05
P97382	Kcnab3	Voltage-gated potassium channel subunit beta-3	KCAB3_MOUSE	-2.30642	2.02223e-06	0.000106856	8.17709e-06
Q08642	Padi2	Protein-arginine deiminase type-2	PADI2_MOUSE	-1.57104	2.07493e-06	0.000106856	0.000157264
Q7TQF7	Amph	Amphiphysin	AMPH_MOUSE	0.519441	2.07832e-06	0.000106856	0.000928919
Q91XE4	Acy3	N-acyl-aromatic-L-amino acid amidohydrolase (carboxylate-forming)	ACY3_MOUSE	-1.76968	2.07858e-06	0.000106856	7.56177e-06
Q9R0U0	Srsf10	Serine/arginine-rich splicing factor 10	SRS10_MOUSE	0.630764	2.09013e-06	0.000106856	2.68685e-05
P09541	Myl4	Myosin light chain 4	MYL4_MOUSE	2.79705	2.1e-06	0.000106856	7.98246e-06
P28230	Gjb1	Gap junction beta-1 protein	CXB1_MOUSE	-2.05929	2.2179e-06	0.000110937	1.29542e-05
P70689	Gjb6	Gap junction beta-6 protein	CXB6_MOUSE	-2.04444	2.23658e-06	0.000110937	6.02154e-06
Q3TRM4	Pnpla6	Neuropathy target esterase	PLPL6_MOUSE	-1.32443	2.2386e-06	0.000110937	4.19252e-06
Q8VHW2	Cacng8	Voltage-dependent calcium channel gamma-8 subunit	CCG8_MOUSE	1.14622	2.36461e-06	0.000115643	5.82691e-05
Q9D154	Serpinb1a	Leukocyte elastase inhibitor A	ILEUA_MOUSE	-1.51702	2.37414e-06	0.000115643	0.000151533
P62317	Snrpd2	Small nuclear ribonucleoprotein Sm D2	SMD2_MOUSE	0.67946	2.45891e-06	0.00011741	7.74357e-05
Q8K4Z0	Lgi2	Leucine-rich repeat LGI family member 2	LGI2_MOUSE	-1.60253	2.46501e-06	0.00011741	4.94798e-05
Q8BIZ1	Anks1b	Ankyrin repeat and sterile alpha motif domain-containing protein 1B	ANS1B_MOUSE	3.08653	2.48418e-06	0.00011741	8.14435e-05
P58404	Strn4	Striatin-4	STRN4_MOUSE	1.08122	2.51933e-06	0.00011741	6.22489e-05
Q810U3	Nfasc	Neurofascin	NFASC_MOUSE	-0.342409	2.53262e-06	0.00011741	0.000401324
Q9CZA6	Nde1	Nuclear distribution protein nudE homolog 1	NDE1_MOUSE	-1.62143	2.53464e-06	0.00011741	3.48076e-06
P97300	Nptn	Neuroplastin	NPTN_MOUSE	0.552249	2.55464e-06	0.00011741	0.000570836
Q91VC7	Ppp1r14a	Protein phosphatase 1 regulatory subunit 14A	PP14A_MOUSE	-1.70914	2.61896e-06	0.000118822	9.73384e-05
O70133	Dhx9	ATP-dependent RNA helicase A	DHX9_MOUSE	0.576198	2.62706e-06	0.000118822	0.000114644
P35454	Oxt	Oxytocin-neurophysin 1	NEU1_MOUSE	-1.14709	2.69788e-06	0.000119914	1.84333e-06
Q8CAK1	Iba57	Putative transferase CAF17 homolog, mitochondrial	CAF17_MOUSE	0.663648	2.70702e-06	0.000119914	3.27274e-05
Q8CC27	Cacnb2	Voltage-dependent L-type calcium channel subunit beta-2	CACB2_MOUSE	1.04847	2.71433e-06	0.000119914	1.90528e-05
P50114	S100b	Protein S100-B	S100B_MOUSE	-1.77509	3.21247e-06	0.000140185	0.000256091
P55088	Aqp4	Aquaporin-4	AQP4_MOUSE	-1.57909	3.24145e-06	0.000140185	1.04549e-05
P13504	Il1r1	Interleukin-1 receptor type 1	IL1R1_MOUSE	0.836532	3.27001e-06	0.000140185	0.000138561
Q9JL62	Gltp	Glycolipid transfer protein	GLTP_MOUSE	-1.51939	3.27155e-06	0.000140185	0.000342712
Q01149	Col1a2	Collagen alpha-2(I) chain	CO1A2_MOUSE	-3.53977	3.37537e-06	0.000143554	9.4762e-05
P51655	Gpc4	Glypican-4	GPC4_MOUSE	1.50299	3.48148e-06	0.00014697	1.18079e-05
P70441	Slc9a3r1	Na(+)/H(+) exchange regulatory cofactor NHE-RF1	NHRF1_MOUSE	0.7201	3.5552e-06	0.000148423	0.000236952
Q8BGK5	Slc35f1	Solute carrier family 35 member F1	S35F1_MOUSE	0.998143	3.57078e-06	0.000148423	6.73758e-06
Q8BYI6	Lpcat2	Lysophosphatidylcholine acyltransferase 2	PCAT2_MOUSE	-0.608978	3.59404e-06	0.000148423	6.47405e-06
Q8CI71	Vps50	Syndetin	VPS50_MOUSE	0.505424	3.64524e-06	0.000149455	3.60641e-05
P62137	Ppp1ca	Serine/threonine-protein phosphatase PP1-alpha catalytic subunit	PP1A_MOUSE	1.05124	3.72847e-06	0.000150339	0.000224768
Q8BGP5	Tmem127	Transmembrane protein 127	TM127_MOUSE	-0.98861	3.73309e-06	0.000150339	9.2599e-05
Q9CVB6	Arpc2	Actin-related protein 2/3 complex subunit 2	ARPC2_MOUSE	0.639431	3.74595e-06	0.000150339	0.000226323
P11798	Camk2a	Calcium/calmodulin-dependent protein kinase type II subunit alpha	KCC2A_MOUSE	1.54381	3.82322e-06	0.000152367	0.000948037
Q68FL4	Ahcyl2	Putative adenosylhomocysteinase 3	SAHH3_MOUSE	-0.957166	3.88251e-06	0.000153656	0.000104628
P09572	ATP1A1	Sodium/potassium-transporting ATPase subunit alpha-1	AT1A1_CHICK	-0.736423	3.93539e-06	0.000154674	0.00409895
P07214	Sparc	SPARC	SPRC_MOUSE	-2.08081	4.01873e-06	0.000156728	2.21483e-05
Q9D6E4	Ttc9b	Tetratricopeptide repeat protein 9B	TTC9B_MOUSE	1.36982	4.04686e-06	0.000156728	6.15802e-06
Q8BNJ6	Neto2	Neuropilin and tolloid-like protein 2	NETO2_MOUSE	1.7355	4.07014e-06	0.000156728	6.69449e-06
P47753	Capza1	F-actin-capping protein subunit alpha-1	CAZA1_MOUSE	-0.763209	4.11992e-06	0.000157382	0.000101224
Q8VCY8	Plppr2	Phospholipid phosphatase-related protein type 2	PLPR2_MOUSE	1.95246	4.14236e-06	0.000157382	1.0898e-05
Q9WTS4	Tenm1	Teneurin-1	TEN1_MOUSE	0.639209	4.24286e-06	0.000160133	1.02882e-05
Q99KY4	Gak	Cyclin-G-associated kinase	GAK_MOUSE	0.484424	4.2888e-06	0.000160802	5.0307e-05
P35438	Grin1	Glutamate receptor ionotropic, NMDA 1	NMDZ1_MOUSE	1.52191	4.33034e-06	0.000160937	5.94449e-05
P97441	Slc30a3	Zinc transporter 3	ZNT3_MOUSE	2.70544	4.37315e-06	0.000160937	0.00010953
P56942	Pmch	Pro-MCH	MCH_MOUSE	-1.8715	4.37712e-06	0.000160937	4.44543e-05
Q8BVI4	Qdpr	Dihydropteridine reductase	DHPR_MOUSE	-1.03053	4.43379e-06	0.000161975	0.000598628
Q8VDL4	Adpgk	ADP-dependent glucokinase	ADPGK_MOUSE	-0.96093	4.63195e-06	0.000167608	9.53623e-06
Q99NB9	Sf3b1	Splicing factor 3B subunit 1	SF3B1_MOUSE	0.625908	4.64678e-06	0.000167608	2.77991e-05
P51174	Acadl	Long-chain specific acyl-CoA dehydrogenase, mitochondrial	ACADL_MOUSE	-0.811254	4.75136e-06	0.00016982	0.000160069
Q9JKV5	Scamp4	Secretory carrier-associated membrane protein 4	SCAM4_MOUSE	0.67707	4.7677e-06	0.00016982	7.10451e-05
Q80TE7	Lrrc7	Leucine-rich repeat-containing protein 7	LRRC7_MOUSE	3.2027	4.87864e-06	0.000172692	5.95372e-05
Q921C1	Gjc3	Gap junction gamma-3 protein	CXG3_MOUSE	-1.10879	4.97476e-06	0.000174165	5.41328e-05
Q8C996	Tmem163	Transmembrane protein 163	TM163_MOUSE	-0.684076	4.98139e-06	0.000174165	4.3637e-05
Q05186	Rcn1	Reticulocalbin-1	RCN1_MOUSE	1.51344	5.1234e-06	0.000178038	5.52401e-05
P0C7M9	Clec2l	C-type lectin domain family 2 member L	CLC2L_MOUSE	-1.3826	5.22871e-06	0.000178676	6.55467e-05
Q8C8N2	Scai	Protein SCAI	SCAI_MOUSE	0.544713	5.22899e-06	0.000178676	4.99848e-05
Q62433	Ndrg1	Protein NDRG1	NDRG1_MOUSE	-1.13098	5.23581e-06	0.000178676	0.000133881
Q8K310	Matr3	Matrin-3	MATR3_MOUSE	0.917373	5.31322e-06	0.000180238	0.000233253
O55060,Q9QX22	Tpmt	Thiopurine S-methyltransferase	TPMT_MOUSE,TPMT_MUSSP	-0.805855	5.41404e-06	0.000182572	1.85368e-05
O55143	Atp2a2	Sarcoplasmic/endoplasmic reticulum calcium ATPase 2	AT2A2_MOUSE	0.781459	5.5962e-06	0.000187082	0.000972367
Q9DB41	Slc25a18	Mitochondrial glutamate carrier 2	GHC2_MOUSE	0.512847	5.61345e-06	0.000187082	0.000803016
Q9Z2I8	Suclg2	Succinate--CoA ligase [GDP-forming] subunit beta, mitochondrial	SUCB2_MOUSE	-0.796464	5.72401e-06	0.000188145	8.39061e-05
O88322	Nid2	Nidogen-2	NID2_MOUSE	-0.505483	5.73883e-06	0.000188145	2.6396e-05
Q6ZPU9	Kifbp	KIF-binding protein	KBP_MOUSE	-0.586179	5.74439e-06	0.000188145	4.26526e-05
Q60625	Icam5	Intercellular adhesion molecule 5	ICAM5_MOUSE	5.90931	5.80048e-06	0.000188897	0.000147677
Q8BNN1	Spata2l	Spermatogenesis-associated protein 2-like protein	SPA2L_MOUSE	2.87953	5.87575e-06	0.000190261	6.4429e-05
Q9D4H9	Phf14	PHD finger protein 14	PHF14_MOUSE	1.52789	5.9508e-06	0.000191259	2.78629e-06
Q80Y17	Llgl1	Lethal(2) giant larvae protein homolog 1	L2GL1_MOUSE	-1.11771	5.97369e-06	0.000191259	0.000111909
Q9QYG0	Ndrg2	Protein NDRG2	NDRG2_MOUSE	-0.775415	6.21733e-06	0.000197193	0.00126738
Q8R464	Cadm4	Cell adhesion molecule 4	CADM4_MOUSE	-0.963557	6.22823e-06	0.000197193	0.000460849
Q8K370	Acad10	Acyl-CoA dehydrogenase family member 10	ACD10_MOUSE	-0.942024	6.32226e-06	0.00019883	6.79377e-06
Q8BG89	Znf365	Protein ZNF365	ZN365_MOUSE	3.25956	6.34972e-06	0.00019883	3.00236e-06
P84309	Adcy5	Adenylate cyclase type 5	ADCY5_MOUSE	1.67945	6.42502e-06	0.000200088	0.000277234
Q8BTJ4	Enpp4	Bis(5'-adenosyl)-triphosphatase enpp4	ENPP4_MOUSE	-0.602619	6.54693e-06	0.000202777	1.30328e-05
P97315	Csrp1	Cysteine and glycine-rich protein 1	CSRP1_MOUSE	-1.0373	6.75124e-06	0.000207975	0.000430819
Q60857	Slc6a4	Sodium-dependent serotonin transporter	SC6A4_MOUSE	-1.20525	6.79084e-06	0.00020807	3.37654e-05
Q8R0A7	Kiaa0513	Uncharacterized protein KIAA0513	K0513_MOUSE	0.702603	6.86226e-06	0.000209134	0.000128942
Q5HZI2	C2cd4cC2CD4 family	C2 calcium-dependent domain-containing protein 4C	C2C4C_MOUSE	1.59694	6.97901e-06	0.000210157	2.70397e-05
Q8C6E0	Cfap36	Cilia- and flagella-associated protein 36	CFA36_MOUSE	-1.28302	6.99534e-06	0.000210157	3.49969e-05
Q3TYD4	Arsg	Arylsulfatase G	ARSG_MOUSE	-1.96076	7.00648e-06	0.000210157	9.77095e-06
Q99J99	Mpst	3-mercaptopyruvate sulfurtransferase	THTM_MOUSE	0.55445	7.17781e-06	0.000214102	4.87028e-05
P48318	Gad1	Glutamate decarboxylase 1	DCE1_MOUSE	-0.692034	7.21312e-06	0.000214102	0.000391445
Q8R2H9	Phospho1	Phosphoethanolamine/phosphocholine phosphatase	PHOP1_MOUSE	-1.05837	7.30365e-06	0.000215103	6.07167e-06
Q80UP3	Dgkz	Diacylglycerol kinase zeta	DGKZ_MOUSE	1.15756	7.32235e-06	0.000215103	3.62823e-05
Q8BG18	Necab1	N-terminal EF-hand calcium-binding protein 1	NECA1_MOUSE	2.196	7.418e-06	0.000215477	3.82185e-05
Q3USB7	Plcl1	Inactive phospholipase C-like protein 1	PLCL1_MOUSE	-0.651764	7.44043e-06	0.000215477	9.58233e-05
Q9CZS1	Aldh1b1	Aldehyde dehydrogenase X, mitochondrial	AL1B1_MOUSE	0.869094	7.44849e-06	0.000215477	0.000109069
Q8VC88	Gca	Grancalcin	GRAN_MOUSE	-0.618493	7.50216e-06	0.000215934	2.4328e-05
Q3U0D9	Hace1	E3 ubiquitin-protein ligase HACE1	HACE1_MOUSE	0.637358	7.81408e-06	0.000223478	1.3799e-05
Q6P9J5	Kank4	KN motif and ankyrin repeat domain-containing protein 4	KANK4_MOUSE	-1.61053	7.84271e-06	0.000223478	1.10482e-05
Q8R570	Snap47	Synaptosomal-associated protein 47	SNP47_MOUSE	-0.49334	7.88473e-06	0.000223558	0.000376137
Q9Z0H4	Celf2	CUGBP Elav-like family member 2	CELF2_MOUSE	2.4245	8.12964e-06	0.00022936	8.41945e-05
P03995	Gfap	Glial fibrillary acidic protein	GFAP_MOUSE	-3.46033	8.2215e-06	0.00023081	0.00114571
P28650	Adss1	Adenylosuccinate synthetase isozyme 1	PURA1_MOUSE	-1.31779	8.37173e-06	0.000233875	7.46424e-05
P63034	Cyth2	Cytohesin-2	CYH2_MOUSE	1.3075	8.41589e-06	0.000233962	2.64023e-05
Q8CGA3	Slc43a2	Large neutral amino acids transporter small subunit 4	LAT4_MOUSE	-0.663034	8.64187e-06	0.000238323	1.43578e-05
Q8BL97	Srsf7	Serine/arginine-rich splicing factor 7	SRSF7_MOUSE	0.650121	8.65642e-06	0.000238323	0.000144638
Q3UHD9	Agap2	Arf-GAP with GTPase, ANK repeat and PH domain-containing protein 2	AGAP2_MOUSE	1.70425	8.70323e-06	0.00023846	7.55846e-05
Q8CC35	Synpo	Synaptopodin	SYNPO_MOUSE	3.77755	8.80117e-06	0.000238865	0.000122847
Q6P9Z1	Smarcd3	SWI/SNF-related matrix-associated actin-dependent regulator of chromatin subfamily D member 3	SMRD3_MOUSE	0.808272	8.80185e-06	0.000238865	4.28443e-06
Q8K448	Abca5	ATP-binding cassette sub-family A member 5	ABCA5_MOUSE	-1.26058	8.95819e-06	0.000241956	6.67264e-06
Q99KE1	Me2	NAD-dependent malic enzyme, mitochondrial	MAOM_MOUSE	1.03666	9.40106e-06	0.000251991	0.000110071
Q78JW9	Ubfd1	Ubiquitin domain-containing protein UBFD1	UBFD1_MOUSE	-0.815626	9.41816e-06	0.000251991	8.2553e-05
Q99L20	Gstt3	Glutathione S-transferase theta-3	GSTT3_MOUSE	-1.7068	9.59311e-06	0.000255473	8.47062e-06
Q99J85	Nptxr	Neuronal pentraxin receptor	NPTXR_MOUSE	1.29774	9.75527e-06	0.000258583	8.47165e-05
Q9D7P6	Iscu	Iron-sulfur cluster assembly enzyme ISCU, mitochondrial	ISCU_MOUSE	-0.552922	9.85099e-06	0.000259578	0.000101197
Q9WTX2	Prkra	Interferon-inducible double-stranded RNA-dependent protein kinase activator A	PRKRA_MOUSE	-1.48048	9.88392e-06	0.000259578	3.15171e-05
Q9QXV0	Pcsk1n	ProSAAS	PCSK1_MOUSE	-0.858091	1.02106e-05	0.000266927	0.000840375
Q6IRU2	Tpm4	Tropomyosin alpha-4 chain	TPM4_MOUSE	-0.784589	1.05218e-05	0.000273806	0.000100604
P20917	Mag	Myelin-associated glycoprotein	MAG_MOUSE	-1.61703	1.06164e-05	0.000275012	0.00121762
Q61730,Q63621	Il1rap	Interleukin-1 receptor accessory protein	IL1AP_MOUSE,IL1AP_RAT	-1.07047	1.07512e-05	0.000277245	2.34802e-05
O35078,P18894	Dao	D-amino-acid oxidase	OXDA_RAT,OXDA_MOUSE	-10.1015	1.10995e-05	0.00028302	3.52219e-06
P54818	Galc	Galactocerebrosidase	GALC_MOUSE	-0.963941	1.11225e-05	0.00028302	8.99882e-06
Q80TZ3	Dnajc6	Putative tyrosine-protein phosphatase auxilin	AUXI_MOUSE	0.507659	1.11241e-05	0.00028302	0.00024702
Q9CQW2	Arl8b	ADP-ribosylation factor-like protein 8B	ARL8B_MOUSE	-0.293888	1.11969e-05	0.000283606	6.29616e-05
Q8R4V2	Dusp15	Dual specificity protein phosphatase 15	DUS15_MOUSE	-1.80072	1.12519e-05	0.000283738	3.74021e-05
Q9JJ69	Kcnip2	Kv channel-interacting protein 2	KCIP2_MOUSE	3.61234	1.13414e-05	0.000284633	1.71178e-05
Q8VH51	Rbm39	RNA-binding protein 39	RBM39_MOUSE	0.623515	1.13873e-05	0.000284633	3.16714e-05
Q9JM52	Mink1	Misshapen-like kinase 1	MINK1_MOUSE	0.840755	1.14611e-05	0.000285227	0.000113156
P52189	Kcnj4	Inward rectifier potassium channel 4	KCNJ4_MOUSE	5.59479	1.16126e-05	0.00028774	9.05438e-06
Q8BP92	Rcn2	Reticulocalbin-2	RCN2_MOUSE	-0.702319	1.16916e-05	0.000288443	0.000107081
Q6P9K8	Caskin1	Caskin-1	CSKI1_MOUSE	-0.402436	1.1759e-05	0.000288855	0.000130337
Q3TPX4	Exoc5	Exocyst complex component 5	EXOC5_MOUSE	0.374286	1.20035e-05	0.000293287	4.42074e-05
Q8R238	Sdsl	Serine dehydratase-like	SDSL_MOUSE	-1.06075	1.20423e-05	0.000293287	7.89701e-06
P70193	Lrig1	Leucine-rich repeats and immunoglobulin-like domains protein 1	LRIG1_MOUSE	-2.84025	1.21468e-05	0.000294574	1.89646e-06
P24452	Capg	Macrophage-capping protein	CAPG_MOUSE	-0.736684	1.22584e-05	0.00029602	3.96366e-06
P63318	Prkcg	Protein kinase C gamma type	KPCG_MOUSE	0.914628	1.23518e-05	0.000297016	0.000193883
P40142	Tkt	Transketolase	TKT_MOUSE	-0.513781	1.25444e-05	0.000300381	0.000679984
Q8K596	Slc8a2	Sodium/calcium exchanger 2	NAC2_MOUSE	1.49629	1.26185e-05	0.000300892	0.00061012
Q3UGX3	Nat8l	N-acetylaspartate synthetase	NAT8L_MOUSE	-1.0986	1.31421e-05	0.000312069	2.18822e-05
Q8CHT1	Ngef	Ephexin-1	NGEF_MOUSE	2.86982	1.33383e-05	0.000315416	0.000144624
Q8CGU1	Calcoco1	Calcium-binding and coiled-coil domain-containing protein 1	CACO1_MOUSE	0.826466	1.4622e-05	0.000343985	5.56987e-05
Q00977	Gjb2	Gap junction beta-2 protein	CXB2_MOUSE	-6.88059	1.47116e-05	0.000343985	1.41047e-06
P61161	Actr2	Actin-related protein 2	ARP2_MOUSE	0.734281	1.47275e-05	0.000343985	0.000380738
Q80WG5	Lrrc8a	Volume-regulated anion channel subunit LRRC8A	LRC8A_MOUSE	-0.543432	1.48829e-05	0.000346194	3.62344e-05
P54763;P29323	Ephb2;EPHB2	Ephrin type-B receptor 2	EPHB2_MOUSE;EPHB2_HUMAN	-1.22671	1.49969e-05	0.000347003	7.7339e-06
P47757	Capzb	F-actin-capping protein subunit beta	CAPZB_MOUSE	0.388208	1.50394e-05	0.000347003	0.000630257
E9Q4S1	Pde8b	High affinity cAMP-specific and IBMX-insensitive 3',5'-cyclic phosphodiesterase 8B	PDE8B_MOUSE	1.79447	1.5352e-05	0.000352785	1.0239e-05
P35283	Rab12	Ras-related protein Rab-12	RAB12_MOUSE	0.306167	1.5559e-05	0.000355016	4.78049e-05
P23927	Cryab	Alpha-crystallin B chain	CRYAB_MOUSE	-1.33996	1.55736e-05	0.000355016	0.000252508
Q61205	Pafah1b3	Platelet-activating factor acetylhydrolase IB subunit gamma	PA1B3_MOUSE	-1.13188	1.58966e-05	0.000359858	0.00010055
Q9JIW9	Ralb	Ras-related protein Ral-B	RALB_MOUSE	-0.634005	1.59123e-05	0.000359858	6.40974e-05
P62823	Rab3c	Ras-related protein Rab-3C	RAB3C_MOUSE	0.779431	1.60942e-05	0.000361981	0.000278878
Q60996	Ppp2r5c	Serine/threonine-protein phosphatase 2A 56 kDa regulatory subunit gamma isoform	2A5G_MOUSE	0.499043	1.6163e-05	0.000361981	9.75536e-05
Q8VDQ8	Sirt2	NAD-dependent protein deacetylase sirtuin-2	SIR2_MOUSE	-1.15177	1.63165e-05	0.000361981	0.0017633
Q9D6F4	Gabra4	Gamma-aminobutyric acid receptor subunit alpha-4	GBRA4_MOUSE	3.44374	1.63337e-05	0.000361981	5.14121e-06
Q5EBJ4	Ermn	Ermin	ERMIN_MOUSE	-1.39792	1.63448e-05	0.000361981	0.000395556
Q8JZW5	Sh2d5	SH2 domain-containing protein 5	SH2D5_MOUSE	1.04225	1.63942e-05	0.000361981	5.73222e-05
P47802	Mtx1	Metaxin-1	MTX1_MOUSE	0.662328	1.64508e-05	0.000361981	0.000152176
Q01097	Grin2b	Glutamate receptor ionotropic, NMDA 2B	NMDE2_MOUSE	1.42654	1.65481e-05	0.000362122	3.70216e-05
Q14B80	Kcnc2	Potassium voltage-gated channel subfamily C member 2	KCNC2_MOUSE	-2.22261	1.65843e-05	0.000362122	3.07104e-05
Q9JJZ4	Ube2j1	Ubiquitin-conjugating enzyme E2 J1	UB2J1_MOUSE	-0.793148	1.67082e-05	0.000363436	2.15984e-05
P70207	Plxna2	Plexin-A2	PLXA2_MOUSE	2.04348	1.71142e-05	0.000370706	1.03578e-05
Q9WUZ9	Entpd5	Ectonucleoside triphosphate diphosphohydrolase 5	ENTP5_MOUSE	-1.32148	1.72317e-05	0.000370706	3.92264e-06
P26339	Chga	Chromogranin-A	CMGA_MOUSE	-0.609046	1.74855e-05	0.000370706	3.32161e-05
P58281	Opa1	Dynamin-like 120 kDa protein, mitochondrial	OPA1_MOUSE	0.604203	1.75302e-05	0.000370706	0.000392629
Q05512	Mark2	Serine/threonine-protein kinase MARK2	MARK2_MOUSE	1.41808	1.75424e-05	0.000370706	3.99223e-05
Q99KX1	Mlf2	Myeloid leukemia factor 2	MLF2_MOUSE	2.23651	1.75436e-05	0.000370706	9.41282e-05
A2CG49	Kalrn	Kalirin	KALRN_MOUSE	1.69104	1.75531e-05	0.000370706	7.8156e-06
Q7TPM6	Fsd1	Fibronectin type III and SPRY domain-containing protein 1	FSD1_MOUSE	-0.445049	1.75629e-05	0.000370706	8.38786e-05
O88745	Scrg1	Scrapie-responsive protein 1	SCRG1_MOUSE	0.472112	1.77592e-05	0.000373467	2.9261e-05
Q8C9H6	Strip2	Striatin-interacting proteins 2	STRP2_MOUSE	1.99256	1.8679e-05	0.000391366	1.56373e-05
Q8K0U4	Hspa12a	Heat shock 70 kDa protein 12A	HS12A_MOUSE	-0.594916	1.89816e-05	0.000396251	0.000561557
Q8QZY2	Glyctk	Glycerate kinase	GLCTK_MOUSE	1.04795	1.90822e-05	0.000396895	3.08949e-06
Q9QYB1	Clic4	Chloride intracellular channel protein 4	CLIC4_MOUSE	-1.10448	1.91803e-05	0.000397486	0.000221697
Q80SW1	Ahcyl1	S-adenosylhomocysteine hydrolase-like protein 1	SAHH2_MOUSE	-0.923561	1.9396e-05	0.0004005	0.000675332
Q9JIK9	Mrps34	28S ribosomal protein S34, mitochondrial	RT34_MOUSE	0.394864	1.9692e-05	0.000405142	3.0466e-05
Q3UHE1	Pitpnm3	Membrane-associated phosphatidylinositol transfer protein 3	PITM3_MOUSE	0.756244	1.97747e-05	0.000405382	6.40555e-06
Q920P5	Ak5	Adenylate kinase isoenzyme 5	KAD5_MOUSE	1.02704	2.002e-05	0.000408938	2.07718e-05
Q9Z0V2	Kcnd2	Potassium voltage-gated channel subfamily D member 2	KCND2_MOUSE	1.26068	2.01398e-05	0.000409917	4.80398e-05
Q8BRU6	Slc18a2	Synaptic vesicular amine transporter	VMAT2_MOUSE	2.24785	2.0932e-05	0.000423538	7.10375e-05
Q9DCM0	Ethe1	Persulfide dioxygenase ETHE1, mitochondrial	ETHE1_MOUSE	-0.700951	2.10618e-05	0.000423538	0.00010386
F6SEU4	Syngap1	Ras/Rap GTPase-activating protein SynGAP	SYGP1_MOUSE	3.24639	2.11431e-05	0.000423538	0.000192608
Q9R0A1	Clcn2	Chloride channel protein 2	CLCN2_MOUSE	-1.49903	2.11631e-05	0.000423538	4.00961e-06
P16092;P21803;Q61851;Q03142	Fgfr1;Fgfr2;Fgfr3;Fgfr4	Fibroblast growth factor receptor 1;Fibroblast growth factor receptor 2;Fibroblast growth factor receptor 3;Fibroblast growth factor receptor 4	FGFR1_MOUSE;FGFR2_MOUSE;FGFR3_MOUSE;FGFR4_MOUSE	-0.812154	2.12475e-05	0.000423538	1.20161e-05
Q3TH73	Ttyh2	Protein tweety homolog 2	TTYH2_MOUSE	-1.41227	2.12549e-05	0.000423538	2.5909e-05
P97467	Pam	Peptidyl-glycine alpha-amidating monooxygenase	AMD_MOUSE	-0.581904	2.1429e-05	0.000425518	5.02554e-05
Q5F2E8	Taok1	Serine/threonine-protein kinase TAO1	TAOK1_MOUSE	0.521279	2.18255e-05	0.000431174	3.86597e-05
Q62440;Q62441	Tle1;Tle4	Transducin-like enhancer protein 1;Transducin-like enhancer protein 4	TLE1_MOUSE;TLE4_MOUSE	1.99703	2.18651e-05	0.000431174	3.43561e-06
O88485	Dync1i1	Cytoplasmic dynein 1 intermediate chain 1	DC1I1_MOUSE	-0.387236	2.20173e-05	0.000432677	0.000195705
P28661	Septin4	Septin-4	SEPT4_MOUSE	-1.13791	2.2348e-05	0.000437667	0.000110201
Q9EPR5	Sorcs2	VPS10 domain-containing receptor SorCS2	SORC2_MOUSE	0.711099	2.26288e-05	0.000438933	2.50395e-05
E9PV86	Mctp1	Multiple C2 and transmembrane domain-containing protein 1	MCTP1_MOUSE	1.90238	2.266e-05	0.000438933	7.65457e-06
P20152	Vim	Vimentin	VIME_MOUSE	-1.43598	2.27922e-05	0.000438933	0.00175967
Q6PH08	Erc2	ERC protein 2	ERC2_MOUSE	0.77723	2.28925e-05	0.000438933	0.000100886
Q3U214	Mast3	Microtubule-associated serine/threonine-protein kinase 3	MAST3_MOUSE	1.94973	2.29556e-05	0.000438933	1.52387e-05
Q8CGK7	Gnal	Guanine nucleotide-binding protein G(olf) subunit alpha	GNAL_MOUSE	2.837	2.30423e-05	0.000438933	0.000155782
Q9EP97	Senp3	Sentrin-specific protease 3	SENP3_MOUSE	1.14721	2.30497e-05	0.000438933	4.26397e-06
P63078	Gng8	Guanine nucleotide-binding protein G(I)/G(S)/G(O) subunit gamma-8	GBG8_MOUSE	-3.98227	2.30764e-05	0.000438933	8.28424e-05
Q62465	Vat1	Synaptic vesicle membrane protein VAT-1 homolog	VAT1_MOUSE	-0.587623	2.31058e-05	0.000438933	0.000378032
Q62165	Dag1	Dystroglycan	DAG1_MOUSE	-0.619848	2.31895e-05	0.00043906	3.04548e-05
E9Q0C6	Kiaa1210	Acrosomal protein KIAA1210	K1210_MOUSE	-1.29791	2.34379e-05	0.000440901	1.07018e-05
Q80V42	Cpm	Carboxypeptidase M	CBPM_MOUSE	-1.38325	2.34822e-05	0.000440901	4.90056e-05
Q62422	Ostf1	Osteoclast-stimulating factor 1	OSTF1_MOUSE	-0.568428	2.35452e-05	0.000440901	1.52853e-05
P70335	Rock1	Rho-associated protein kinase 1	ROCK1_MOUSE	0.470024	2.35962e-05	0.000440901	9.28328e-05
Q99LC5	Etfa	Electron transfer flavoprotein subunit alpha, mitochondrial	ETFA_MOUSE	-0.394646	2.39795e-05	0.000446598	0.000333718
G5E829	Atp2b1	Plasma membrane calcium-transporting ATPase 1	AT2B1_MOUSE	1.45013	2.41527e-05	0.000447142	0.000474514
P28481;P02458	Col2a1;COL2A1	Collagen alpha-1(II) chain	CO2A1_MOUSE;CO2A1_HUMAN	-3.13797	2.41656e-05	0.000447142	7.69575e-05
P52795	Efnb1	Ephrin-B1	EFNB1_MOUSE	0.869549	2.4584e-05	0.00045235	5.99637e-06
Q60714	Slc27a1	Long-chain fatty acid transport protein 1	S27A1_MOUSE	-0.279136	2.46058e-05	0.00045235	3.95401e-05
P52800	Efnb2	Ephrin-B2	EFNB2_MOUSE	1.61987	2.5009e-05	0.000456503	8.50823e-06
Q9R069	Bcam	Basal cell adhesion molecule	BCAM_MOUSE	-1.26142	2.50672e-05	0.000456503	5.03171e-05
Q8BWS5	Gprin3	G protein-regulated inducer of neurite outgrowth 3	GRIN3_MOUSE	2.69338	2.50845e-05	0.000456503	5.91778e-05
P63141	Kcna2	Potassium voltage-gated channel subfamily A member 2	KCNA2_MOUSE	-1.25745	2.51521e-05	0.000456503	7.70787e-05
Q91X52	Dcxr	L-xylulose reductase	DCXR_MOUSE	-0.597831	2.55649e-05	0.000462521	5.19264e-06
P09240	Cck	Cholecystokinin	CCKN_MOUSE	1.30513	2.57752e-05	0.000463161	5.29859e-05
Q60780	Gas7	Growth arrest-specific protein 7	GAS7_MOUSE	1.05927	2.58122e-05	0.000463161	5.48815e-05
Q8R3T5	Stxbp6	Syntaxin-binding protein 6	STXB6_MOUSE	-0.844483	2.58812e-05	0.000463161	5.1492e-05
O35604	Npc1	NPC intracellular cholesterol transporter 1	NPC1_MOUSE	-0.881257	2.59253e-05	0.000463161	2.11378e-05
Q923B0	Ggact	Gamma-glutamylaminecyclotransferase	GGACT_MOUSE	-1.20271	2.63994e-05	0.000470156	1.6009e-05
Q6ZPZ3	Zc3h4	Zinc finger CCCH domain-containing protein 4	ZC3H4_MOUSE	0.590377	2.67355e-05	0.000474659	4.74026e-06
P19324	Serpinh1	Serpin H1	SERPH_MOUSE	-1.19502	2.68366e-05	0.000474975	7.74096e-06
Q5HZI9	Slc25a51	Solute carrier family 25 member 51	S2551_MOUSE	0.585251	2.7532e-05	0.000485774	4.49435e-05
Q80UW2	Fbxo2	F-box only protein 2	FBX2_MOUSE	-1.15501	2.76736e-05	0.000486458	0.000318825
P28564,P28334;P60020,P28222,Q0EAB5,P35404,P79250,P56496,Q6XXX8,P46636,Q588Y6,Q9N2B7,O08892,P79399,P49144	Htr1b,Htr1b;HTR1B,HTR1B,HTR1B,HTR1B,HTR1B,HTR1B,HTR1B,HTR1B,HTR1B,HTR1B,HTR1B,HTR1B,HTR1B	5-hydroxytryptamine receptor 1B,5-hydroxytryptamine receptor 1B;5-hydroxytryptamine receptor 1B,5-hydroxytryptamine receptor 1B,5-hydroxytryptamine receptor 1B,5-hydroxytryptamine receptor 1B,5-hydroxytryptamine receptor 1B,5-hydroxytryptamine receptor 1B,5-hydroxytryptamine receptor 1B,5-hydroxytryptamine receptor 1B,5-hydroxytryptamine receptor 1B,5-hydroxytryptamine receptor 1B,5-hydroxytrypta…	5HT1B_RAT,5HT1B_MOUSE;5HT1B_PANTR,5HT1B_HUMAN,5HT1B_HORSE,5HT1B_DIDVI,5HT1B_CANLF,5HT1B_SPAEH,5HT1B_VULVU,5HT1B_CRIGR,5HT1B_FELCA,5HT1B_GORGO,5HT1B_CAVPO,5HT1B_PIG,5HT1B_RABIT	-1.47197	2.77415e-05	0.000486458	8.34853e-06
Q63564,Q8BG39	Sv2b	Synaptic vesicle glycoprotein 2B	SV2B_RAT,SV2B_MOUSE	1.30477	2.8029e-05	0.000489719	0.000505818
Q62108	Dlg4	Disks large homolog 4	DLG4_MOUSE	1.09721	2.80994e-05	0.000489719	0.000276128
B1AXV0	Frrs1l	DOMON domain-containing protein FRRS1L	FRS1L_MOUSE	1.1902	2.84116e-05	0.00049322	2.83303e-05
A2A690	Tanc2	Protein TANC2	TANC2_MOUSE	0.530967	2.84776e-05	0.00049322	2.38795e-05
Q91WM1	Strbp	Spermatid perinuclear RNA-binding protein	STRBP_MOUSE	0.450701	2.85598e-05	0.00049322	1.91903e-05
P13020	Gsn	Gelsolin	GELS_MOUSE	-0.740454	2.86967e-05	0.000494086	0.000137096
Q8HW98	Iglon5	IgLON family member 5	IGLO5_MOUSE	-1.07044	2.88308e-05	0.000494899	6.0771e-05
Q80YA9	Cnksr2	Connector enhancer of kinase suppressor of ras 2	CNKR2_MOUSE	1.6867	2.89996e-05	0.00049514	4.61426e-05
Q3UQ44	Iqgap2	Ras GTPase-activating-like protein IQGAP2	IQGA2_MOUSE	1.40966	2.90185e-05	0.00049514	3.18663e-06
P63080	Gabrb3	Gamma-aminobutyric acid receptor subunit beta-3	GBRB3_MOUSE	1.25084	2.92507e-05	0.000497611	2.43363e-05
P70175	Dlg3	Disks large homolog 3	DLG3_MOUSE	1.17662	2.95614e-05	0.000500952	7.86324e-05
Q9CQI7	Snrpb2	U2 small nuclear ribonucleoprotein B''	RU2B_MOUSE	0.719005	2.96299e-05	0.000500952	2.01428e-05
Q91XU3	Pip4k2c	Phosphatidylinositol 5-phosphate 4-kinase type-2 gamma	PI42C_MOUSE	0.984913	2.97108e-05	0.000500952	6.26021e-05
Q6R891	Ppp1r9b	Neurabin-2	NEB2_MOUSE	1.20617	2.99643e-05	0.000503737	0.000144012
Q9D708	S100a16	Protein S100-A16	S10AG_MOUSE	-0.731564	3.00773e-05	0.000504148	2.38509e-05
Q08274	Dmwd	Dystrophia myotonica WD repeat-containing protein	DMWD_MOUSE	0.713764	3.06338e-05	0.000508261	3.30159e-05
Q8BUR4	Dock1	Dedicator of cytokinesis protein 1	DOCK1_MOUSE	-1.0125	3.06455e-05	0.000508261	4.57565e-06
B1AZI6	Thoc2	THO complex subunit 2	THOC2_MOUSE	0.951862	3.06655e-05	0.000508261	3.2393e-06
P10833	Rras	Ras-related protein R-Ras	RRAS_MOUSE	-0.540981	3.06794e-05	0.000508261	4.13478e-05
Q8R3P0	Aspa	Aspartoacylase	ACY2_MOUSE	-1.18262	3.09086e-05	0.000509836	0.000156667
P51906	Slc1a1	Excitatory amino acid transporter 3	EAA3_MOUSE	0.83929	3.09533e-05	0.000509836	9.37156e-06
P35285	Rab22a	Ras-related protein Rab-22A	RB22A_MOUSE	-0.550903	3.12959e-05	0.000513993	7.61048e-05
O35633	Slc32a1	Vesicular inhibitory amino acid transporter	VIAAT_MOUSE	-0.924798	3.15041e-05	0.000515925	0.000388719
P60521;P60520	Gabarapl2;GABARAPL2	Gamma-aminobutyric acid receptor-associated protein-like 2	GBRL2_MOUSE;GBRL2_HUMAN	-0.369276	3.16803e-05	0.000517324	0.000178038
Q61885	Mog	Myelin-oligodendrocyte glycoprotein	MOG_MOUSE	-1.31763	3.18101e-05	0.00051796	0.00259015
Q9QYR9	Acot2	Acyl-coenzyme A thioesterase 2, mitochondrial	ACOT2_MOUSE	-0.552757	3.21488e-05	0.000521983	3.43302e-05
Q8BMK4	Ckap4	Cytoskeleton-associated protein 4	CKAP4_MOUSE	-1.16867	3.22485e-05	0.000522115	2.65932e-05
Q61335	Bcap31	B-cell receptor-associated protein 31	BAP31_MOUSE	-0.535536	3.25287e-05	0.000525159	5.55427e-05
Q91YR7	Prpf6	Pre-mRNA-processing factor 6	PRP6_MOUSE	0.599276	3.27045e-05	0.000525608	6.92543e-06
Q6ZPQ6	Pitpnm2	Membrane-associated phosphatidylinositol transfer protein 2	PITM2_MOUSE	1.52611	3.27987e-05	0.000525608	4.2657e-05
Q8CHK2	Rln3	Relaxin-3	REL3_MOUSE	-4.71926	3.28332e-05	0.000525608	2.15876e-06
Q6NXK8	Asic1	Acid-sensing ion channel 1	ASIC1_MOUSE	0.776285	3.32228e-05	0.000530355	1.70008e-05
P23492	Pnp	Purine nucleoside phosphorylase	PNPH_MOUSE	-0.539362	3.35475e-05	0.000531762	7.19657e-05
P24529	Th	Tyrosine 3-monooxygenase	TY3H_MOUSE	1.57248	3.35605e-05	0.000531762	0.000171183
Q80TR1	Adgrl1	Adhesion G protein-coupled receptor L1	AGRL1_MOUSE	0.424041	3.35909e-05	0.000531762	5.31429e-05
Q9D1J1	Necap2	Adaptin ear-binding coat-associated protein 2	NECP2_MOUSE	-1.51704	3.37823e-05	0.000532775	9.2709e-06
O70443	Gnaz	Guanine nucleotide-binding protein G(z) subunit alpha	GNAZ_MOUSE	0.852853	3.41218e-05	0.000532775	0.000229623
Q9EPB7	Gpr88	Probable G-protein coupled receptor 88	GPR88_MOUSE	14.9696	3.41445e-05	0.000532775	6.51829e-06
Q9D9S3	Rwdd2a	RWD domain-containing protein 2A	RWD2A_MOUSE	-1.27122	3.41458e-05	0.000532775	5.20927e-06
Q6ZQH8	Nup188	Nucleoporin NUP188 homolog	NU188_MOUSE	0.694544	3.41628e-05	0.000532775	2.13206e-06
Q8C3Q5	Shisa7	Protein shisa-7	SHSA7_MOUSE	2.52148	3.42158e-05	0.000532775	3.2261e-05
Q6NS52	Dgkb	Diacylglycerol kinase beta	DGKB_MOUSE	2.07968	3.51318e-05	0.000544875	0.000189734
Q60928,P07314	Ggt1	Glutathione hydrolase 1 proenzyme	GGT1_MOUSE,GGT1_RAT	-0.674427	3.5184e-05	0.000544875	1.5101e-05
Q8K2T1	Nmral1	NmrA-like family domain-containing protein 1	NMRL1_MOUSE	-0.846463	3.57726e-05	0.000551528	0.000124423
B9EJI9	Tmem229a	Transmembrane protein 229A	T229A_MOUSE	-1.17212	3.58072e-05	0.000551528	1.13496e-05
Q63959	Kcnc3	Potassium voltage-gated channel subfamily C member 3	KCNC3_MOUSE	-3.04139	3.59347e-05	0.000551547	6.08427e-05
Q8CFI0	Nedd4l	E3 ubiquitin-protein ligase NEDD4-like	NED4L_MOUSE	1.28585	3.6002e-05	0.000551547	5.06502e-05
Q91WL8	Wwox	WW domain-containing oxidoreductase	WWOX_MOUSE	-0.37274	3.63392e-05	0.00055457	2.31481e-05
Q9CR20	Ier3ip1	Immediate early response 3-interacting protein 1	IR3IP_MOUSE	0.911539	3.63939e-05	0.00055457	2.83116e-05
Q6PB70	Ano8	Anoctamin-8	ANO8_MOUSE	-0.796616	3.67829e-05	0.00055832	9.04806e-06
Q61137	Astn1	Astrotactin-1	ASTN1_MOUSE	0.656731	3.68893e-05	0.00055832	3.22627e-05
P21278	Gna11	Guanine nucleotide-binding protein subunit alpha-11	GNA11_MOUSE	0.573724	3.6934e-05	0.00055832	0.000117761
Q7TPR4	Actn1	Alpha-actinin-1	ACTN1_MOUSE	1.67785	3.73649e-05	0.000562749	0.000787254
O35405	Pld3	Phospholipase D3	PLD3_MOUSE	0.953995	3.75194e-05	0.000562749	0.000163266
Q7TNS7	Asic4	Acid-sensing ion channel 4	ASIC4_MOUSE	2.62289	3.76127e-05	0.000562749	3.25548e-06
P70288	Hdac2	Histone deacetylase 2	HDAC2_MOUSE	0.966528	3.76603e-05	0.000562749	3.19164e-05
O35215	Ddt	D-dopachrome decarboxylase	DOPD_MOUSE	-0.669096	3.77207e-05	0.000562749	0.000391953
Q80Z24	Negr1	Neuronal growth regulator 1	NEGR1_MOUSE	0.592698	3.83083e-05	0.000570024	0.000280484
A2ASQ1	Agrn	Agrin	AGRIN_MOUSE	-0.504063	3.86854e-05	0.000574136	3.82432e-05
Q9CPW0	Cntnap2	Contactin-associated protein-like 2	CNTP2_MOUSE	-0.697218	3.88213e-05	0.000574656	0.000227264
P28571	Slc6a9	Sodium- and chloride-dependent glycine transporter 1	SC6A9_MOUSE	-2.25424	3.90527e-05	0.000576491	0.000180718
Q9Z127	Slc7a5	Large neutral amino acids transporter small subunit 1	LAT1_MOUSE	-0.559945	3.91476e-05	0.000576491	9.19776e-05
Q99LB7	Sardh	Sarcosine dehydrogenase, mitochondrial	SARDH_MOUSE	-1.0063	3.92965e-05	0.000577193	1.41056e-05
Q61301	Ctnna2	Catenin alpha-2	CTNA2_MOUSE	0.548873	3.98974e-05	0.000584512	0.000169778
Q91YT8	Tmem63a	CSC1-like protein 1	CSCL1_MOUSE	-0.983557	4.05725e-05	0.000591843	8.46352e-06
Q9QXW9	Slc7a8	Large neutral amino acids transporter small subunit 2	LAT2_MOUSE	1.05584	4.0725e-05	0.000591843	4.44115e-05
Q8C0M9	Asrgl1	Isoaspartyl peptidase/L-asparaginase	ASGL1_MOUSE	-0.374555	4.07817e-05	0.000591843	0.000523244
Q9CPY7	Lap3	Cytosol aminopeptidase	AMPL_MOUSE	-0.608109	4.08132e-05	0.000591843	0.000306524
Q80TQ2	Cyld	Ubiquitin carboxyl-terminal hydrolase CYLD	CYLD_MOUSE	2.58787	4.09448e-05	0.000591976	9.8899e-05
Q4V8B0,Q4KMM3	Oxr1	Oxidation resistance protein 1	OXR1_RAT,OXR1_MOUSE	1.09335	4.11017e-05	0.000591976	0.000160919
Q9CXE7	Tmed5	Transmembrane emp24 domain-containing protein 5	TMED5_MOUSE	-0.654587	4.1134e-05	0.000591976	1.42147e-05
Q91ZF0	Dnajc24	DnaJ homolog subfamily C member 24	DJC24_MOUSE	-0.595751	4.1894e-05	0.000600807	8.44066e-06
Q61233	Lcp1	Plastin-2	PLSL_MOUSE	-0.914749	4.19584e-05	0.000600807	0.000158562
A2APX8	Scn1a	Sodium channel protein type 1 subunit alpha	SCN1A_MOUSE	-1.22429	4.23778e-05	0.000604692	3.29414e-05
P17809	Slc2a1	Solute carrier family 2, facilitated glucose transporter member 1	GTR1_MOUSE	-1.08143	4.2452e-05	0.000604692	0.000329256
P97930	Dtymk	Thymidylate kinase	KTHY_MOUSE	0.443773	4.25481e-05	0.000604692	3.37656e-05
Q9R112	Sqor	Sulfide:quinone oxidoreductase, mitochondrial	SQOR_MOUSE	-0.760978	4.27619e-05	0.000605083	2.2407e-05
Q9CYH2	Prxl2a	Peroxiredoxin-like 2A	PXL2A_MOUSE	-0.544084	4.2788e-05	0.000605083	0.000203357
Q922B1	Macrod1	ADP-ribose glycohydrolase MACROD1	MACD1_MOUSE	-1.11583	4.28961e-05	0.000605112	6.99804e-05
O54991	Cntnap1	Contactin-associated protein 1	CNTP1_MOUSE	-0.862055	4.33737e-05	0.000608818	0.000325172
P51910	Apod	Apolipoprotein D	APOD_MOUSE	-1.99731	4.34194e-05	0.000608818	4.70113e-05
Q921U8	Smtn	Smoothelin	SMTN_MOUSE	-4.59864	4.36579e-05	0.000608818	4.24663e-06
Q9CY57	Chtop	Chromatin target of PRMT1 protein	CHTOP_MOUSE	0.691493	4.38016e-05	0.000608818	2.09814e-05
P09405	Ncl	Nucleolin	NUCL_MOUSE	0.558756	4.38828e-05	0.000608818	0.000208587
B1AS29	Grik3	Glutamate receptor ionotropic, kainate 3	GRIK3_MOUSE	1.38474	4.3923e-05	0.000608818	3.77316e-06
P42125	Eci1	Enoyl-CoA delta isomerase 1, mitochondrial	ECI1_MOUSE	-0.725977	4.40877e-05	0.000608818	0.000139084
Q91YW3	Dnajc3	DnaJ homolog subfamily C member 3	DNJC3_MOUSE	-0.472921	4.41709e-05	0.000608818	1.25221e-05
B1AZP2	Dlgap4	Disks large-associated protein 4	DLGP4_MOUSE	0.973066	4.43559e-05	0.000608818	4.18875e-05
P98156	Vldlr	Very low-density lipoprotein receptor	VLDLR_MOUSE	1.04669	4.43574e-05	0.000608818	6.21422e-06
Q9CRB6	Tppp3	Tubulin polymerization-promoting protein family member 3	TPPP3_MOUSE	-0.774222	4.44098e-05	0.000608818	0.000376071
Q8R3U1	Plaat3	Phospholipase A and acyltransferase 3	PLAT3_MOUSE	-1.44326	4.46618e-05	0.000608818	1.90647e-05
Q5DU25	Iqsec2	IQ motif and SEC7 domain-containing protein 2	IQEC2_MOUSE	0.418475	4.47129e-05	0.000608818	0.00016318
Q62420	Sh3gl2	Endophilin-A1	SH3G2_MOUSE	0.62661	4.48178e-05	0.000608818	0.000540752
Q6PGE7	Slc6a7	Sodium-dependent proline transporter	SC6A7_MOUSE	0.733475	4.48842e-05	0.000608818	5.85621e-05
Q9Z2M6	Ubl3	Ubiquitin-like protein 3	UBL3_MOUSE	-0.544655	4.4946e-05	0.000608818	2.00378e-05
P10493	Nid1	Nidogen-1	NID1_MOUSE	-1.1607	4.4975e-05	0.000608818	6.69852e-05
O08917	Flot1	Flotillin-1	FLOT1_MOUSE	0.435182	4.55099e-05	0.000613806	0.000137104
Q9EP69	Sacm1l	Phosphatidylinositide phosphatase SAC1	SAC1_MOUSE	-0.708656	4.55589e-05	0.000613806	0.000123291
P47758	Srprb	Signal recognition particle receptor subunit beta	SRPRB_MOUSE	-0.535072	4.60096e-05	0.000616249	1.63618e-05
Q64455	Ptprj	Receptor-type tyrosine-protein phosphatase eta	PTPRJ_MOUSE	0.723844	4.60199e-05	0.000616249	1.03829e-05
Q8BHH2	Rab9b	Ras-related protein Rab-9B	RAB9B_MOUSE	-0.349858	4.61075e-05	0.000616249	4.46723e-05
A2RT62	Fbxl16	F-box/LRR-repeat protein 16	FXL16_MOUSE	1.58324	4.61727e-05	0.000616249	0.000118308
O54941	Smarce1	SWI/SNF-related matrix-associated actin-dependent regulator of chromatin subfamily E member 1	SMCE1_MOUSE	0.829943	4.63029e-05	0.000616542	1.24845e-05
Q61187	Tsg101	Tumor susceptibility gene 101 protein	TS101_MOUSE	0.278899	4.66247e-05	0.000619381	4.83038e-05
Q9D8V7	Sec11c	Signal peptidase complex catalytic subunit SEC11C	SC11C_MOUSE	-0.66992	4.68166e-05	0.000620483	1.32063e-05
Q8BMS1	Hadha	Trifunctional enzyme subunit alpha, mitochondrial	ECHA_MOUSE	-0.681573	4.69952e-05	0.000620839	0.000210682
P37804	Tagln	Transgelin	TAGL_MOUSE	-3.29883	4.70613e-05	0.000620839	0.000155941
Q9JIY5	Htra2	Serine protease HTRA2, mitochondrial	HTRA2_MOUSE	-0.426009	4.75479e-05	0.000625103	5.6129e-05
Q8K2Y9	Ccm2	Cerebral cavernous malformations protein 2 homolog	CCM2_MOUSE	1.69165	4.76039e-05	0.000625103	1.24269e-05
Q921Q7	Rin1	Ras and Rab interactor 1	RIN1_MOUSE	1.24392	4.78402e-05	0.000626762	3.0487e-05
Q9D4H1	Exoc2	Exocyst complex component 2	EXOC2_MOUSE	0.359957	4.82102e-05	0.000630161	4.58099e-05
Q9CX80	Cygb	Cytoglobin	CYGB_MOUSE	-1.26391	4.94934e-05	0.000644032	0.00010422
Q3V0K9	Pls1	Plastin-1	PLSI_MOUSE	-1.34847	4.94974e-05	0.000644032	4.01317e-05
Q8BYB9	Poglut1	Protein O-glucosyltransferase 1	PGLT1_MOUSE	-0.713252	4.97402e-05	0.000645716	1.58533e-05
P61264	Stx1b	Syntaxin-1B	STX1B_MOUSE	-0.557369	5.06226e-05	0.00065436	0.00162707
Q99NE5	Rims1	Regulating synaptic membrane exocytosis protein 1	RIMS1_MOUSE	0.853513	5.06508e-05	0.00065436	5.86211e-05
P56375	Acyp2	Acylphosphatase-2	ACYP2_MOUSE	-0.72644	5.07948e-05	0.00065436	0.000162125
Q99PI8	Rtn4r	Reticulon-4 receptor	RTN4R_MOUSE	0.914519	5.09529e-05	0.00065436	1.09176e-05
P22933	Gabrd	Gamma-aminobutyric acid receptor subunit delta	GBRD_MOUSE	14.8952	5.09801e-05	0.00065436	4.62368e-06
P17710	Hk1	Hexokinase-1	HXK1_MOUSE	0.333554	5.1562e-05	0.000660342	0.00194096
E9Q7G0	Numa1	Nuclear mitotic apparatus protein 1	NUMA1_MOUSE	0.516885	5.16858e-05	0.000660443	1.97237e-05
Q9WV31	Arc	Activity-regulated cytoskeleton-associated protein	ARC_MOUSE	5.05513	5.18644e-05	0.000660938	2.7664e-06
Q8R4I7	Neto1	Neuropilin and tolloid-like protein 1	NETO1_MOUSE	2.70532	5.1996e-05	0.000660938	5.07492e-06
P68181	Prkacb	cAMP-dependent protein kinase catalytic subunit beta	KAPCB_MOUSE	0.673305	5.20725e-05	0.000660938	0.000355293
Q9CWS0	Ddah1	N(G),N(G)-dimethylarginine dimethylaminohydrolase 1	DDAH1_MOUSE	0.316579	5.22719e-05	0.000661377	0.000300702
P21836	Ache	Acetylcholinesterase	ACES_MOUSE	1.80141	5.23392e-05	0.000661377	4.84419e-05
O55131	Septin7	Septin-7	SEPT7_MOUSE	0.329489	5.25484e-05	0.000662552	0.0010131
P50171	Hsd17b8	Estradiol 17-beta-dehydrogenase 8	DHB8_MOUSE	0.54871	5.31023e-05	0.000667199	7.22059e-05
Q9JKD3	Scamp5	Secretory carrier-associated membrane protein 5	SCAM5_MOUSE	0.597264	5.31511e-05	0.000667199	0.00072991
Q9DB26	Phyhd1	Phytanoyl-CoA dioxygenase domain-containing protein 1	PHYD1_MOUSE	-2.11626	5.35488e-05	0.000669443	4.23473e-06
P68404	Prkcb	Protein kinase C beta type	KPCB_MOUSE	0.608753	5.35649e-05	0.000669443	0.000757996
Q8K1S2	Unc5d	Netrin receptor UNC5D	UNC5D_MOUSE	0.766993	5.40674e-05	0.000672904	2.17811e-06
P11087	Col1a1	Collagen alpha-1(I) chain	CO1A1_MOUSE	-2.78449	5.40779e-05	0.000672904	4.05094e-05
Q8VCW8	Acsf2	Medium-chain acyl-CoA ligase ACSF2, mitochondrial	ACSF2_MOUSE	-0.646027	5.44765e-05	0.000675137	0.000100651
D3Z7P3	Gls	Glutaminase kidney isoform, mitochondrial	GLSK_MOUSE	0.619518	5.44943e-05	0.000675137	0.000477298
Q9D0B5	Tstd3	Thiosulfate sulfurtransferase/rhodanese-like domain-containing protein 3	TSTD3_MOUSE	-0.411921	5.46777e-05	0.000675939	3.87446e-05
P97492	Rgs14	Regulator of G-protein signaling 14	RGS14_MOUSE	1.49426	5.51043e-05	0.000678784	1.79498e-05
Q99JY9	Actr3	Actin-related protein 3	ARP3_MOUSE	0.541964	5.5146e-05	0.000678784	0.000751603
Q9QXQ1	Pde7b	cAMP-specific 3',5'-cyclic phosphodiesterase 7B	PDE7B_MOUSE	2.07751	5.57824e-05	0.000683704	4.01578e-06
Q8C163	Exog	Nuclease EXOG, mitochondrial	EXOG_MOUSE	0.673451	5.57856e-05	0.000683704	5.54105e-05
Q9NZB2,Q6A0A9	FAM120A	Constitutive coactivator of PPAR-gamma-like protein 1	F120A_HUMAN,F120A_MOUSE	0.912376	5.63509e-05	0.000688965	3.69126e-05
P97352	S100a13	Protein S100-A13	S10AD_MOUSE	-0.411095	5.64567e-05	0.000688965	0.000147396
Q8CI94	Pygb	Glycogen phosphorylase, brain form	PYGB_MOUSE	-0.293499	5.68967e-05	0.000692851	0.000441664
Q99PV0	Prpf8	Pre-mRNA-processing-splicing factor 8	PRP8_MOUSE	0.751024	5.74788e-05	0.000698446	2.46932e-05
Q8K012	Fnbp1l	Formin-binding protein 1-like	FBP1L_MOUSE	0.997421	5.76194e-05	0.000698665	2.80901e-05
Q6PDH0	Phldb1	Pleckstrin homology-like domain family B member 1	PHLB1_MOUSE	-0.827203	5.78146e-05	0.000699544	7.05421e-06
Q9Z2B9	Rps6ka4	Ribosomal protein S6 kinase alpha-4	KS6A4_MOUSE	1.23591	5.79535e-05	0.00069974	7.20387e-06
Q5PR73	Diras2	GTP-binding protein Di-Ras2	DIRA2_MOUSE	0.88889	5.86735e-05	0.000706935	0.000125712
Q62442	Vamp1	Vesicle-associated membrane protein 1	VAMP1_MOUSE	-2.19532	5.89471e-05	0.000708733	0.000131596
Q4VA53	Pds5b	Sister chromatid cohesion protein PDS5 homolog B	PDS5B_MOUSE	0.557545	5.93618e-05	0.000712217	8.96679e-06
Q9CZW5	Tomm70	Mitochondrial import receptor subunit TOM70	TOM70_MOUSE	0.916786	5.96074e-05	0.000713162	0.000552298
Q63810	Ppp3r1	Calcineurin subunit B type 1	CANB1_MOUSE	0.927124	5.96909e-05	0.000713162	0.00105611
Q8R1C0	Kcnc4	Potassium voltage-gated channel subfamily C member 4	KCNC4_MOUSE	-1.78279	6.05014e-05	0.000721333	5.29801e-06
P14115	Rpl27a	60S ribosomal protein L27a	RL27A_MOUSE	0.89944	6.06499e-05	0.000721595	0.000234994
P17046,P17047	Lamp2	Lysosome-associated membrane glycoprotein 2	LAMP2_RAT,LAMP2_MOUSE	-0.82345	6.12615e-05	0.000727353	3.79752e-05
O35449	Prrt1	Proline-rich transmembrane protein 1	PRRT1_MOUSE	2.15308	6.15011e-05	0.00072745	6.77113e-05
Q91V64	Isoc1	Isochorismatase domain-containing protein 1	ISOC1_MOUSE	-0.621096	6.1525e-05	0.00072745	5.26523e-05
Q9D6Y7	Msra	Mitochondrial peptide methionine sulfoxide reductase	MSRA_MOUSE	-0.402122	6.18295e-05	0.000729537	4.16583e-05
O08739	Ampd3	AMP deaminase 3	AMPD3_MOUSE	-0.279507	6.22179e-05	0.000731225	3.89394e-05
P05132	Prkaca	cAMP-dependent protein kinase catalytic subunit alpha	KAPCA_MOUSE	0.633875	6.22292e-05	0.000731225	8.17137e-05
O09117	Sypl1	Synaptophysin-like protein 1	SYPL1_MOUSE	-1.10494	6.23907e-05	0.000731614	0.000100018
Q8R5M8	Cadm1	Cell adhesion molecule 1	CADM1_MOUSE	0.693026	6.29486e-05	0.00073664	0.000252776
Q791T5	Mtch1	Mitochondrial carrier homolog 1	MTCH1_MOUSE	0.298438	6.32349e-05	0.00073833	0.000291361
Q8CBW3	Abi1	Abl interactor 1	ABI1_MOUSE	0.6354	6.33521e-05	0.00073833	0.00023566
Q7TSH2	Phkb	Phosphorylase b kinase regulatory subunit beta	KPBB_MOUSE	-0.52583	6.36602e-05	0.000740407	1.75148e-05
Q8R5A0	Smyd2	N-lysine methyltransferase SMYD2	SMYD2_MOUSE	-4.83865	6.38049e-05	0.000740579	5.24638e-07
Q00PI9	Hnrnpul2	Heterogeneous nuclear ribonucleoprotein U-like protein 2	HNRL2_MOUSE	0.718207	6.44412e-05	0.000746444	9.12615e-05
Q6P5D8	Smchd1	Structural maintenance of chromosomes flexible hinge domain-containing protein 1	SMHD1_MOUSE	0.944053	6.49092e-05	0.000749831	5.56389e-06
Q3TW96	Uap1l1	UDP-N-acetylhexosamine pyrophosphorylase-like protein 1	UAP1L_MOUSE	-0.634836	6.50477e-05	0.000749831	3.35087e-05
Q6PFD5	Dlgap3	Disks large-associated protein 3	DLGP3_MOUSE	2.59722	6.52598e-05	0.000749831	8.33801e-05
P70452	Stx4	Syntaxin-4	STX4_MOUSE	-1.01916	6.52599e-05	0.000749831	2.38217e-05
O88456	Capns1	Calpain small subunit 1	CPNS1_MOUSE	-0.758952	6.54816e-05	0.000750864	0.000204084
O35526	Stx1a	Syntaxin-1A	STX1A_MOUSE	1.85101	6.59817e-05	0.000754623	0.000340352
Q9QX60	Dguok	Deoxyguanosine kinase, mitochondrial	DGUOK_MOUSE	0.944838	6.62026e-05	0.000754623	1.49353e-05
Q8C050	Rps6ka5	Ribosomal protein S6 kinase alpha-5	KS6A5_MOUSE	1.30283	6.62066e-05	0.000754623	2.76764e-05
Q9QXT8,P0C092	Kcnip3	Calsenilin,Calsenilin isoform 4	CSEN_MOUSE,CSEN4_MOUSE	-1.74379	6.6543e-05	0.000756943	6.29807e-06
Q8R0Y8	Slc25a42	Mitochondrial coenzyme A transporter SLC25A42	S2542_MOUSE	0.641138	6.70591e-05	0.000761295	1.6429e-05
P50172	Hsd11b1	Corticosteroid 11-beta-dehydrogenase isozyme 1	DHI1_MOUSE	-1.82268	6.78357e-05	0.00076858	1.88184e-05
Q8VE42	Ankrd49	Ankyrin repeat domain-containing protein 49	ANR49_MOUSE	0.963145	6.89755e-05	0.000779944	1.96908e-06
Q9D898	Arpc5l	Actin-related protein 2/3 complex subunit 5-like protein	ARP5L_MOUSE	0.52973	6.93526e-05	0.0007818	0.000389132
Q8VCM3	Zfyve21	Zinc finger FYVE domain-containing protein 21	ZFY21_MOUSE	-0.50792	6.95249e-05	0.0007818	4.46816e-06
P52760	Rida	2-iminobutanoate/2-iminopropanoate deaminase	RIDA_MOUSE	-0.872509	6.9685e-05	0.0007818	0.000433087
Q8K2F0;Q9ESU6	Brd3;Brd4	Bromodomain-containing protein 3;Bromodomain-containing protein 4	BRD3_MOUSE;BRD4_MOUSE	0.650651	6.96884e-05	0.0007818	9.51565e-06
Q9CPQ3	Tomm22	Mitochondrial import receptor subunit TOM22 homolog	TOM22_MOUSE	0.678187	7.0195e-05	0.000785936	0.000176975
Q61469	Plpp1	Phospholipid phosphatase 1	PLPP1_MOUSE	-0.631446	7.08605e-05	0.000790392	1.90352e-05
Q9QXS6	Dbn1	Drebrin	DREB_MOUSE	1.0023	7.08704e-05	0.000790392	0.000225557
Q8BP40	Acp6	Lysophosphatidic acid phosphatase type 6	PPA6_MOUSE	0.553282	7.19009e-05	0.000800053	1.84913e-05
Q9JM63	Kcnj10	ATP-sensitive inward rectifier potassium channel 10	KCJ10_MOUSE	-1.70311	7.20174e-05	0.000800053	0.000151981
P51863	Atp6v0d1	V-type proton ATPase subunit d 1	VA0D1_MOUSE	0.462748	7.29615e-05	0.000807442	0.00152354
P19096	Fasn	Fatty acid synthase	FAS_MOUSE	-0.424204	7.3199e-05	0.000807442	0.000287553
Q9DBG9	Tax1bp3	Tax1-binding protein 3	TX1B3_MOUSE	-0.589297	7.31992e-05	0.000807442	7.41511e-06
Q9Z239	Fxyd1	Phospholemman	PLM_MOUSE	-0.680468	7.32492e-05	0.000807442	0.000130738
Q99MJ9	Ddx50	ATP-dependent RNA helicase DDX50	DDX50_MOUSE	0.939547	7.3817e-05	0.000812129	3.80576e-06
B9EJA2	Cttnbp2	Cortactin-binding protein 2	CTTB2_MOUSE	1.47209	7.4888e-05	0.000822325	6.94812e-05
Q9DBG3	Ap2b1	AP-2 complex subunit beta	AP2B1_MOUSE	0.497773	7.52862e-05	0.000825107	0.000935629
Q8C460	Eri3	ERI1 exoribonuclease 3	ERI3_MOUSE	0.581218	7.5723e-05	0.0008283	7.29933e-05
Q8C031	Lrrc4c	Leucine-rich repeat-containing protein 4C	LRC4C_MOUSE	2.04877	7.58681e-05	0.0008283	1.10275e-05
Q03137	Epha4	Ephrin type-A receptor 4	EPHA4_MOUSE	1.18361	7.66409e-05	0.000835137	6.82127e-05
Q8BFU8,Q7TSF2	Slc17a8	Vesicular glutamate transporter 3	VGLU3_MOUSE,VGLU3_RAT	2.12108	7.68255e-05	0.000835551	1.24606e-06
Q6R0H6,Q6R0H7,Q9Z0F1,P63094	Gnas	Protein ALEX,Guanine nucleotide-binding protein G(s) subunit alpha isoforms XLas,Neuroendocrine secretory protein 55,Guanine nucleotide-binding protein G(s) subunit alpha isoforms short	ALEX_MOUSE,GNAS1_MOUSE,GNAS3_MOUSE,GNAS2_MOUSE	-0.515897	7.74239e-05	0.000840455	0.000305031
Q91VR8	Brk1	Protein BRICK1	BRK1_MOUSE	0.620295	7.76874e-05	0.000840512	0.000225236
P26443	Glud1	Glutamate dehydrogenase 1, mitochondrial	DHE3_MOUSE	-0.487144	7.77242e-05	0.000840512	0.00119375
D3Z7H4	Gsg1l	Germ cell-specific gene 1-like protein	GSG1L_MOUSE	3.58356	7.82681e-05	0.000844792	8.86503e-06
Q80ZW2	Them6	Protein THEM6	THEM6_MOUSE	0.619395	7.89832e-05	0.00084929	4.95719e-05
Q9D662	Sec23b	Protein transport protein Sec23B	SC23B_MOUSE	-0.627969	7.91291e-05	0.00084929	4.36e-06
D3YZI9	Pgbd5	PiggyBac transposable element-derived protein 5	PGBD5_MOUSE	1.00305	7.9132e-05	0.00084929	3.52495e-05
Q6P4T2	Snrnp200	U5 small nuclear ribonucleoprotein 200 kDa helicase	U520_MOUSE	0.518762	7.95886e-05	0.000852585	3.04183e-05
Q3TCN2	Plbd2	Putative phospholipase B-like 2	PLBL2_MOUSE	-0.44478	8.00999e-05	0.000856453	2.3694e-05
Q3UU96	Cdc42bpa	Serine/threonine-protein kinase MRCK alpha	MRCKA_MOUSE	-0.331741	8.04629e-05	0.000858723	1.91002e-05
Q14CH0	Fam171b	Protein FAM171B	F171B_MOUSE	0.514852	8.0811e-05	0.000858723	1.70058e-05
O35691	Pnn	Pinin	PININ_MOUSE	0.535465	8.09036e-05	0.000858723	1.30192e-05
Q8K298	Anln	Anillin	ANLN_MOUSE	-0.643351	8.09149e-05	0.000858723	0.000119289
P97742	Cpt1a	Carnitine O-palmitoyltransferase 1, liver isoform	CPT1A_MOUSE	-0.483301	8.15737e-05	0.000864105	2.74973e-05
Q14BV6	Ydjc	Carbohydrate deacetylase	YDJC_MOUSE	1.183	8.21876e-05	0.000868055	4.6655e-06
Q6ZQ18	Efr3b	Protein EFR3 homolog B	EFR3B_MOUSE	0.323406	8.23539e-05	0.000868055	8.97954e-05
Q6PFX8	Rimkla	N-acetylaspartylglutamate synthase A	RIMKA_MOUSE	-4.44257	8.24035e-05	0.000868055	2.62667e-06
Q99KW9	Itfg1	T-cell immunomodulatory protein	TIP_MOUSE	-0.338445	8.30567e-05	0.00087178	4.54464e-05
Q8BZF2	Nipal4	Magnesium transporter NIPA4	NIPA4_MOUSE	-1.7697	8.30631e-05	0.00087178	7.72313e-06
Q62419	Sh3gl1	Endophilin-A2	SH3G1_MOUSE	0.760647	8.38149e-05	0.000878054	0.00121231
P62761	Vsnl1	Visinin-like protein 1	VISL1_MOUSE	-0.554398	8.41992e-05	0.000879027	0.0021884
P99024	Tubb5	Tubulin beta-5 chain	TBB5_MOUSE	0.383447	8.42163e-05	0.000879027	0.00277698
P46460	Nsf	Vesicle-fusing ATPase	NSF_MOUSE	0.289172	8.46902e-05	0.000882357	0.00181059
Q3UEZ8	Slc10a4	Sodium/bile acid cotransporter 4	NTCP4_MOUSE	2.51583	8.53721e-05	0.000887839	1.2572e-05
Q8BGF8	Slc35d3	Solute carrier family 35 member D3	S35D3_MOUSE	-1.44062	8.56244e-05	0.00088884	2.88903e-05
P56695	Wfs1	Wolframin	WFS1_MOUSE	1.01447	8.59597e-05	0.000890698	0.000136237
Q8C5Q4	Grsf1	G-rich sequence factor 1	GRSF1_MOUSE	-0.699116	8.65785e-05	0.000894818	1.76319e-05
Q9D387	Lamp5	Lysosome-associated membrane glycoprotein 5	LAMP5_MOUSE	-1.50865	8.66713e-05	0.000894818	0.00012976
Q68FD9	Kiaa1549	UPF0606 protein KIAA1549	K1549_MOUSE	1.28261	8.69328e-05	0.000895895	1.30655e-05
Q61739	Itga6	Integrin alpha-6	ITA6_MOUSE	-0.400844	8.81678e-05	0.000906983	7.76534e-06
P55099	Tac3	Tachykinin-3	TKNK_MOUSE	-5.11809	8.83316e-05	0.00090703	3.93251e-05
P28656	Nap1l1	Nucleosome assembly protein 1-like 1	NP1L1_MOUSE	0.662654	8.89819e-05	0.000910456	0.000189961
Q9D0L7	Armc10	Armadillo repeat-containing protein 10	ARM10_MOUSE	0.527231	8.91765e-05	0.000910456	6.4759e-05
Q8JZW4	Cpne5	Copine-5	CPNE5_MOUSE	0.953432	8.92559e-05	0.000910456	0.00019572
Q9QX66	Dpf1	Zinc finger protein neuro-d4	DPF1_MOUSE	3.97903	8.93043e-05	0.000910456	1.13773e-06
Q9DBS5	Klc4	Kinesin light chain 4	KLC4_MOUSE	-0.481181	8.95407e-05	0.000911236	8.03048e-05
Q3V0I2	Prr7	Proline-rich protein 7	PRR7_MOUSE	3.6633	8.98648e-05	0.000912905	6.79581e-06
Q811Q9	Pcyt1b	Choline-phosphate cytidylyltransferase B	PCY1B_MOUSE	-0.465763	9.1446e-05	0.000925694	1.68278e-05
Q99JR5	Tinagl1	Tubulointerstitial nephritis antigen-like	TINAL_MOUSE	-1.70265	9.14487e-05	0.000925694	6.13612e-05
O88492	Plin4	Perilipin-4	PLIN4_MOUSE	-2.66888	9.19873e-05	0.000926881	6.019e-06
O55042	Snca	Alpha-synuclein	SYUA_MOUSE	1.13432	9.21219e-05	0.000926881	0.0010459
Q6PDC8	Mfsd4a	Major facilitator superfamily domain-containing protein 4A	MFD4A_MOUSE	1.54758	9.22041e-05	0.000926881	7.63095e-06
P50516	Atp6v1a	V-type proton ATPase catalytic subunit A	VATA_MOUSE	0.312314	9.241e-05	0.000926881	0.00152349
Q8BHB9	Clic6	Chloride intracellular channel protein 6	CLIC6_MOUSE	1.66842	9.27702e-05	0.000926881	2.76909e-06
Q91VS7	Mgst1	Microsomal glutathione S-transferase 1	MGST1_MOUSE	-0.834756	9.28136e-05	0.000926881	4.80206e-05
O70174	Chrna4	Neuronal acetylcholine receptor subunit alpha-4	ACHA4_MOUSE	-1.14821	9.28242e-05	0.000926881	6.50577e-06
P06802,Q924C3	Enpp1	Ectonucleotide pyrophosphatase/phosphodiesterase family member 1	ENPP1_MOUSE,ENPP1_RAT	-1.72268	9.30219e-05	0.000926881	6.52142e-06
Q9QY42	Gpr37	Prosaposin receptor GPR37	GPR37_MOUSE	-1.30992	9.30296e-05	0.000926881	9.62472e-05
Q9JI18	Lrp1b	Low-density lipoprotein receptor-related protein 1B	LRP1B_MOUSE	1.15	9.35805e-05	0.000930742	5.25243e-06
Q9QVP9	Ptk2b	Protein-tyrosine kinase 2-beta	FAK2_MOUSE	1.66508	9.43762e-05	0.000937021	5.2859e-05
Q60899	Elavl2	ELAV-like protein 2	ELAV2_MOUSE	-1.14338	9.49931e-05	0.000941506	4.27049e-05
Q91W29	Cox4i2	Cytochrome c oxidase subunit 4 isoform 2, mitochondrial	COX42_MOUSE	1.2049	9.607e-05	0.000949597	1.26899e-05
P70336	Rock2	Rho-associated protein kinase 2	ROCK2_MOUSE	0.519841	9.61428e-05	0.000949597	0.000130007
Q0VE82	Cpne7	Copine-7	CPNE7_MOUSE	0.995982	9.7002e-05	0.000955319	2.36054e-05
P24472	Gsta4	Glutathione S-transferase A4	GSTA4_MOUSE	-0.649148	9.7192e-05	0.000955319	0.000398509
Q9DBD5	Pelp1	Proline-, glutamic acid- and leucine-rich protein 1	PELP1_MOUSE	0.986507	9.7225e-05	0.000955319	4.47287e-06
Q3TDN2	Faf2	FAS-associated factor 2	FAF2_MOUSE	-0.189663	9.74797e-05	0.000956173	6.40397e-05
D3YZG8	Mthfd2l	Probable bifunctional methylenetetrahydrofolate dehydrogenase/cyclohydrolase 2	MTD2L_MOUSE	-1.74774	9.79707e-05	0.000959338	3.59714e-06
Q8VEH3	Arl8a	ADP-ribosylation factor-like protein 8A	ARL8A_MOUSE	-0.387958	9.82529e-05	0.000960452	0.000224638
Q9EQQ9	Oga	Protein O-GlcNAcase	OGA_MOUSE	0.372061	9.86292e-05	0.00096122	8.42154e-05
Q8R0J7	Vps37b	Vacuolar protein sorting-associated protein 37B	VP37B_MOUSE	0.944435	9.86688e-05	0.00096122	8.36668e-06
Q9D9V3	Echdc1	Ethylmalonyl-CoA decarboxylase	ECHD1_MOUSE	-0.849848	9.93897e-05	0.00096659	7.59839e-05
Q3UVK0	Ermp1	Endoplasmic reticulum metallopeptidase 1	ERMP1_MOUSE	-0.810029	9.96622e-05	0.00096759	3.09463e-05
Q6PDL0	Dync1li2	Cytoplasmic dynein 1 light intermediate chain 2	DC1L2_MOUSE	-0.509121	0.000100221	0.00097136	0.000170774
P11862	Gas2	Growth arrest-specific protein 2	GAS2_MOUSE	-1.15131	0.000100505	0.000972461	2.08513e-06
Q7TNR6	Igsf21	Immunoglobulin superfamily member 21	IGS21_MOUSE	0.386656	0.000101	0.000975592	3.44394e-05
Q9Z0U1	Tjp2	Tight junction protein ZO-2	ZO2_MOUSE	-0.924444	0.000101397	0.000977765	4.76194e-05
Q80U16	Ripor2	Rho family-interacting cell polarization regulator 2	RIPR2_MOUSE	4.2074	0.000102022	0.000981193	7.88596e-07
Q6ZQ82	Arhgap26	Rho GTPase-activating protein 26	RHG26_MOUSE	0.431652	0.000102165	0.000981193	2.6001e-05
Q9CY64	Blvra	Biliverdin reductase A	BIEA_MOUSE	-0.371818	0.000102269	0.000981193	0.000100861
Q5XG73	Acbd5	Acyl-CoA-binding domain-containing protein 5	ACBD5_MOUSE	-0.48181	0.000103593	0.000992231	1.28576e-05
P42567	Eps15	Epidermal growth factor receptor substrate 15	EPS15_MOUSE	-0.702518	0.000103934	0.000993826	3.33403e-05
Q8BVA4	Lmod1	Leiomodin-1	LMOD1_MOUSE	-3.85719	0.000104442	0.000996786	3.6439e-06
Q6WVG3	Kctd12	BTB/POZ domain-containing protein KCTD12	KCD12_MOUSE	0.620187	0.000104608	0.000996786	0.0001387
P23242	Gja1	Gap junction alpha-1 protein	CXA1_MOUSE	-1.19353	0.000104768	0.000996786	0.000314404
Q9QXG4	Acss2	Acetyl-coenzyme A synthetase, cytoplasmic	ACSA_MOUSE	-0.832792	0.000105252	0.000999669	2.97861e-05
Q8K2I1	Fntb	Protein farnesyltransferase subunit beta	FNTB_MOUSE	-0.626537	0.00010562	0.000999669	2.00037e-05
Q8BZT2	Sh3rf2	E3 ubiquitin-protein ligase SH3RF2	SH3R2_MOUSE	inf	0.000105719	0.000999669	1.3757e-06
Q8BHG2	Czib	CXXC motif containing zinc binding protein	CZIB_MOUSE	-0.260268	0.000105773	0.000999669	5.83172e-05
Q00560	Il6st	Interleukin-6 receptor subunit beta	IL6RB_MOUSE	-0.811631	0.000106944	0.00100549	3.17253e-06
Q9D113	Dnlz	DNL-type zinc finger protein	DNLZ_MOUSE	0.953781	0.000106978	0.00100549	1.89648e-05
P57746	Atp6v1d	V-type proton ATPase subunit D	VATD_MOUSE	0.362324	0.000107069	0.00100549	0.000285183
P28474	Adh5	Alcohol dehydrogenase class-3	ADHX_MOUSE	-0.344942	0.000107095	0.00100549	0.000331566
Q7TME0	Plppr4	Phospholipid phosphatase-related protein type 4	PLPR4_MOUSE	2.12423	0.000107587	0.00100845	5.31926e-05
Q02788	Col6a2	Collagen alpha-2(VI) chain	CO6A2_MOUSE	-3.42555	0.000107794	0.00100873	1.08099e-05
Q9ET26	Rnf114	E3 ubiquitin-protein ligase RNF114	RN114_MOUSE	-1.07284	0.000108193	0.00101081	5.73462e-06
Q64012	Raly	RNA-binding protein Raly	RALY_MOUSE	0.713317	0.000108665	0.00101205	3.32594e-05
P58391	Kcnn3	Small conductance calcium-activated potassium channel protein 3	KCNN3_MOUSE	0.975584	0.000108681	0.00101205	2.88349e-06
Q99KP3	Cryl1	Lambda-crystallin homolog	CRYL1_MOUSE	0.65564	0.000109105	0.00101434	3.04371e-05
Q8K4B0	Mta1	Metastasis-associated protein MTA1	MTA1_MOUSE	1.30644	0.000109759	0.00101876	4.59959e-06
Q80VP1	Epn1	Epsin-1	EPN1_MOUSE	0.508963	0.000111112	0.00102954	0.000244026
Q6PDG5	Smarcc2	SWI/SNF complex subunit SMARCC2	SMRC2_MOUSE	0.722828	0.000111282	0.00102954	2.46679e-05
Q8BX10	Pgam5	Serine/threonine-protein phosphatase PGAM5, mitochondrial	PGAM5_MOUSE	0.83385	0.000112193	0.00103583	2.10221e-05
Q3V4B5	Commd6	COMM domain-containing protein 6	COMD6_MOUSE	-0.349645	0.000112326	0.00103583	1.44223e-05
P28738	Kif5c	Kinesin heavy chain isoform 5C	KIF5C_MOUSE	-0.382293	0.000112915	0.0010393	0.000163768
Q61625	Grid2	Glutamate receptor ionotropic, delta-2	GRID2_MOUSE	1.1481	0.000113078	0.0010393	2.60812e-06
P08551	Nefl	Neurofilament light polypeptide	NFL_MOUSE	-1.71443	0.000113249	0.0010393	0.00256343
Q9D554	Sf3a3	Splicing factor 3A subunit 3	SF3A3_MOUSE	0.525125	0.000113824	0.0010416	3.07447e-05
Q80XL6	Acad11	Acyl-CoA dehydrogenase family member 11	ACD11_MOUSE	-0.628057	0.000113865	0.0010416	1.93538e-06
Q8BYA0	Tbcd	Tubulin-specific chaperone D	TBCD_MOUSE	-0.494121	0.000115018	0.00105046	4.22923e-05
Q8VCX6	Kptn	KICSTOR complex protein kaptin	KPTN_MOUSE	0.433512	0.000115478	0.00105297	7.28468e-06
Q3U186	Rars2	Probable arginine--tRNA ligase, mitochondrial	SYRM_MOUSE	0.740011	0.000115864	0.0010548	1.47844e-05
P31786	Dbi	Acyl-CoA-binding protein	ACBP_MOUSE	-0.890819	0.000116162	0.00105583	0.000949474
Q80VQ0	Aldh3b1	Aldehyde dehydrogenase family 3 member B1	AL3B1_MOUSE	-0.944706	0.000117216	0.00106371	5.72787e-05
P55066	Ncan	Neurocan core protein	NCAN_MOUSE	1.39615	0.000117491	0.00106442	0.000406274
O09044	Snap23	Synaptosomal-associated protein 23	SNP23_MOUSE	-0.836278	0.000117667	0.00106442	1.57173e-05
Q6S5J6	Krit1	Krev interaction trapped protein 1	KRIT1_MOUSE	2.18366	0.000118787	0.00107285	7.42831e-06
Q8BNY6	Ncs1	Neuronal calcium sensor 1	NCS1_MOUSE	0.470049	0.00011933	0.00107599	0.000204226
Q9Z1G4	Atp6v0a1	V-type proton ATPase 116 kDa subunit a isoform 1	VPP1_MOUSE	0.456951	0.000119514	0.00107599	0.00115041
P51855	Gss	Glutathione synthetase	GSHB_MOUSE	-0.67238	0.000119701	0.00107599	5.19339e-05
O08585	Clta	Clathrin light chain A	CLCA_MOUSE	0.609553	0.000119993	0.00107692	0.000958177
Q64676	Ugt8	2-hydroxyacylsphingosine 1-beta-galactosyltransferase	CGT_MOUSE	-1.52311	0.000120516	0.00107991	1.25844e-05
Q9D0V7	Ebag9	Receptor-binding cancer antigen expressed on SiSo cells	RCAS1_MOUSE	0.761076	0.000120822	0.00108063	3.859e-06
O35678	Mgll	Monoglyceride lipase	MGLL_MOUSE	0.952545	0.000120976	0.00108063	7.72678e-05
Q9CZ69	Cmtm6	CKLF-like MARVEL transmembrane domain-containing protein 6	CKLF6_MOUSE	-0.835061	0.000121245	0.00108112	1.51424e-05
O08530	S1pr1	Sphingosine 1-phosphate receptor 1	S1PR1_MOUSE	0.353749	0.00012141	0.00108112	8.64354e-05
Q9WU63	Hebp2	Heme-binding protein 2	HEBP2_MOUSE	-1.64214	0.000121902	0.00108381	1.01828e-05
Q6VNS1	Ntrk3	NT-3 growth factor receptor	NTRK3_MOUSE	1.23562	0.00012252	0.00108722	2.31349e-05
Q9R0N3	Syt11	Synaptotagmin-11	SYT11_MOUSE	-0.388077	0.000122668	0.00108722	1.75452e-05
Q9CWW6	Pin4	Peptidyl-prolyl cis-trans isomerase NIMA-interacting 4	PIN4_MOUSE	-0.575289	0.000123244	0.00108956	2.36538e-05
P70372	Elavl1	ELAV-like protein 1	ELAV1_MOUSE	0.847683	0.000123314	0.00108956	0.000142909
P59764	Dock4	Dedicator of cytokinesis protein 4	DOCK4_MOUSE	0.918763	0.000124066	0.00109451	5.52473e-05
Q62376	Snrnp70	U1 small nuclear ribonucleoprotein 70 kDa	RU17_MOUSE	0.658433	0.000124889	0.00109711	8.85665e-05
P50608	Fmod	Fibromodulin	FMOD_MOUSE	-5.34705	0.00012489	0.00109711	1.0221e-05
Q8CCB4	Vps53	Vacuolar protein sorting-associated protein 53 homolog	VPS53_MOUSE	0.579332	0.000124939	0.00109711	4.27244e-05
Q0GNC1	Inf2	Inverted formin-2	INF2_MOUSE	1.62707	0.000125192	0.00109765	6.64047e-05
Q99N93	Mrpl16	39S ribosomal protein L16, mitochondrial	RM16_MOUSE	0.576677	0.00012554	0.001099	1.46777e-05
Q3UYC0	Ppm1h	Protein phosphatase 1H	PPM1H_MOUSE	0.570436	0.00012579	0.00109951	0.000122333
Q8BZZ3	Wwp1	NEDD4-like E3 ubiquitin-protein ligase WWP1	WWP1_MOUSE	-0.521031	0.000126946	0.00110791	2.16573e-05
P16330	Cnp	2',3'-cyclic-nucleotide 3'-phosphodiesterase	CN37_MOUSE	-1.21094	0.000128576	0.00112042	0.005322
Q8CJG0	Ago2	Protein argonaute-2	AGO2_MOUSE	0.699268	0.000129264	0.00112469	1.78783e-05
Q8K4I3	Arhgef6	Rho guanine nucleotide exchange factor 6	ARHG6_MOUSE	-0.729152	0.000129849	0.0011268	4.92828e-06
Q5RKR3	Islr2	Immunoglobulin superfamily containing leucine-rich repeat protein 2	ISLR2_MOUSE	1.05757	0.00012991	0.0011268	8.12422e-06
Q9D8Z2	Triap1	TP53-regulated inhibitor of apoptosis 1	TRIA1_MOUSE	0.515956	0.000130099	0.0011268	2.17013e-05
P59108	Cpne2	Copine-2	CPNE2_MOUSE	0.740564	0.00013048	0.00112838	2.33575e-05
Q9CZR3	Tomm40l	Mitochondrial import receptor subunit TOM40B	TM40L_MOUSE	0.814417	0.000131516	0.00113452	3.57467e-05
Q8BGN3	Enpp6	Ectonucleotide pyrophosphatase/phosphodiesterase family member 6	ENPP6_MOUSE	-1.04613	0.000131588	0.00113452	0.000150914
Q924Z4	Cers2	Ceramide synthase 2	CERS2_MOUSE	-0.99015	0.00013182	0.00113481	2.01158e-05
Q61466	Smarcd1	SWI/SNF-related matrix-associated actin-dependent regulator of chromatin subfamily D member 1	SMRD1_MOUSE	1.07506	0.000132328	0.00113746	5.53994e-06
G3XA57	Rab11fip2	Rab11 family-interacting protein 2	RFIP2_MOUSE	0.755699	0.000132871	0.00114041	1.94879e-05
Q80ZF8	Adgrb3	Adhesion G protein-coupled receptor B3	AGRB3_MOUSE	2.11937	0.000133816	0.00114679	1.51281e-05
Q9ESX5	Dkc1	H/ACA ribonucleoprotein complex subunit DKC1	DKC1_MOUSE	0.575002	0.000134155	0.00114797	1.17774e-05
B2RY04	Dock5	Dedicator of cytokinesis protein 5	DOCK5_MOUSE	-1.84783	0.000134874	0.00115239	2.40784e-06
Q8BLE7	Slc17a6	Vesicular glutamate transporter 2	VGLU2_MOUSE	0.731832	0.000135214	0.00115329	0.000572605
P08414	Camk4	Calcium/calmodulin-dependent protein kinase type IV	KCC4_MOUSE	1.21942	0.000135384	0.00115329	0.000112791
Q9DBN5	Lonp2	Lon protease homolog 2, peroxisomal	LONP2_MOUSE	-1.19704	0.000135709	0.0011541	3.34228e-06
Q9ET01,P09811	Pygl	Glycogen phosphorylase, liver form,Glycogen phosphorylase, liver form	PYGL_MOUSE,PYGL_RAT	-0.207097	0.000135884	0.0011541	0.000111155
P46096	Syt1	Synaptotagmin-1	SYT1_MOUSE	0.813067	0.000137285	0.00116408	0.00128471
P43406	Itgav	Integrin alpha-V	ITAV_MOUSE	-0.299394	0.000137591	0.00116408	2.95685e-05
Q9EPL9	Acox3	Peroxisomal acyl-coenzyme A oxidase 3	ACOX3_MOUSE	-0.82499	0.000137672	0.00116408	6.10742e-06
Q4ACU6	Shank3	SH3 and multiple ankyrin repeat domains protein 3	SHAN3_MOUSE	3.52935	0.000138054	0.00116433	0.000146386
Q6PDM2	Srsf1	Serine/arginine-rich splicing factor 1	SRSF1_MOUSE	0.631332	0.00013811	0.00116433	0.00029014
Q8R3Z5	Cacnb1	Voltage-dependent L-type calcium channel subunit beta-1	CACB1_MOUSE	1.0119	0.000138761	0.0011681	2.18828e-05
Q6IMP4	Panx2	Pannexin-2	PANX2_MOUSE	-1.05858	0.000139289	0.00117032	4.4494e-06
Q8BTV1	Tusc3	Tumor suppressor candidate 3	TUSC3_MOUSE	0.800772	0.000139436	0.00117032	1.01079e-05
Q3TWN3	Cnnm2	Metal transporter CNNM2	CNNM2_MOUSE	-0.551498	0.000139979	0.00117235	2.02043e-05
Q8VE19	Mios	GATOR complex protein MIOS	MIO_MOUSE	0.649759	0.00014009	0.00117235	8.18848e-06
Q3TJD7	Pdlim7	PDZ and LIM domain protein 7	PDLI7_MOUSE	-2.63313	0.000140383	0.00117281	2.09689e-05
Q8K389,Q9JLH5	Cdk5rap2	CDK5 regulatory subunit-associated protein 2	CK5P2_MOUSE,CK5P2_RAT	-0.50027	0.000140556	0.00117281	0.000349096
Q9R1T4	Septin6	Septin-6	SEPT6_MOUSE	0.587932	0.000141728	0.00118086	0.00059447
P16388	Kcna1	Potassium voltage-gated channel subfamily A member 1	KCNA1_MOUSE	-1.12715	0.000142215	0.00118319	0.000252519
Q9ESM3	Hapln2	Hyaluronan and proteoglycan link protein 2	HPLN2_MOUSE	-1.65122	0.000142459	0.00118335	0.000170281
Q5DTY9	Kctd16	BTB/POZ domain-containing protein KCTD16	KCD16_MOUSE	0.700036	0.00014265	0.00118335	0.000115444
P18608	Hmgn1	Non-histone chromosomal protein HMG-14	HMGN1_MOUSE	0.69378	0.000143621	0.00118968	7.28011e-06
P57784	Snrpa1	U2 small nuclear ribonucleoprotein A'	RU2A_MOUSE	0.457409	0.000145046	0.00119973	3.2197e-05
Q8BYP3	Rhof	Rho-related GTP-binding protein RhoF	RHOF_MOUSE	0.44884	0.000145498	0.00120173	7.20116e-06
Q9Z2I2	Fkbp1b	Peptidyl-prolyl cis-trans isomerase FKBP1B	FKB1B_MOUSE	0.390221	0.000145852	0.00120291	2.65106e-05
P62482,P62483	Kcnab2	Voltage-gated potassium channel subunit beta-2	KCAB2_MOUSE,KCAB2_RAT	-0.918967	0.000146501	0.00120641	0.000344397
P29758	Oat	Ornithine aminotransferase, mitochondrial	OAT_MOUSE	-0.291828	0.000146699	0.00120641	0.000132187
P70202	Lxn	Latexin	LXN_MOUSE	-0.385959	0.000148295	0.00121777	0.000152098
Q923D4	Sf3b5	Splicing factor 3B subunit 5	SF3B5_MOUSE	0.499028	0.000148538	0.00121801	2.24713e-05
Q9CQZ1	Hsbp1	Heat shock factor-binding protein 1	HSBP1_MOUSE	0.646651	0.000149379	0.00122315	0.000180268
O88951	Lin7b	Protein lin-7 homolog B	LIN7B_MOUSE	0.576682	0.000150356	0.00122938	7.14309e-05
Q9JHL1	Slc9a3r2	Na(+)/H(+) exchange regulatory cofactor NHE-RF2	NHRF2_MOUSE	-0.373874	0.000151462	0.00123665	2.60489e-05
Q64253	Ly6e	Lymphocyte antigen 6E	LY6E_MOUSE	0.683665	0.000151848	0.00123803	8.02997e-05
Q9EPN1	Nbea	Neurobeachin	NBEA_MOUSE	0.802917	0.000154674	0.00125927	7.27965e-05
Q62093	Srsf2	Serine/arginine-rich splicing factor 2	SRSF2_MOUSE	0.596986	0.000156118	0.00126921	0.000228192
Q8CFI7	Polr2b	DNA-directed RNA polymerase II subunit RPB2	RPB2_MOUSE	0.436814	0.000157015	0.00127468	5.92942e-06
Q9Z2C4	Mtmr1	Myotubularin-related protein 1	MTMR1_MOUSE	0.667926	0.000157476	0.0012766	2.55979e-05
Q9Z0J4	Nos1	Nitric oxide synthase, brain	NOS1_MOUSE	-1.20775	0.000158467	0.00128076	0.000116574
Q62393	Tpd52	Tumor protein D52	TPD52_MOUSE	0.382513	0.000158619	0.00128076	0.000105829
Q6ZWV7	Rpl35	60S ribosomal protein L35	RL35_MOUSE	1.08046	0.000158984	0.00128076	3.87174e-05
Q80U87	Usp8	Ubiquitin carboxyl-terminal hydrolase 8	UBP8_MOUSE	-0.647616	0.000159078	0.00128076	2.30674e-05
P28659	Celf1	CUGBP Elav-like family member 1	CELF1_MOUSE	1.71152	0.000159112	0.00128076	2.89543e-05
Q9R087	Gpc6	Glypican-6	GPC6_MOUSE	1.1893	0.000160837	0.0012926	4.22408e-06
Q8R574	Prpsap2	Phosphoribosyl pyrophosphate synthase-associated protein 2	KPRB_MOUSE	0.146313	0.000161037	0.0012926	9.73031e-05
Q99JY8	Plpp3	Phospholipid phosphatase 3	PLPP3_MOUSE	0.340993	0.000161825	0.0012971	0.000304772
P41241	Csk	Tyrosine-protein kinase CSK	CSK_MOUSE	-0.524302	0.000163252	0.0013067	2.13545e-05
Q9JLI6	Scly	Selenocysteine lyase	SCLY_MOUSE	-1.10351	0.000163942	0.00131038	5.35669e-06
Q6PA06	Atl2	Atlastin-2	ATLA2_MOUSE	0.392973	0.000165255	0.00131903	6.46394e-05
Q62426	Cstb	Cystatin-B	CYTB_MOUSE	-0.672607	0.00016575	0.00132113	0.000141464
Q04714,P01887,P55078,P55077	B2m	Beta-2-microglobulin (Fragment),Beta-2-microglobulin,Beta-2-microglobulin (Fragment),Beta-2-microglobulin (Fragment)	B2MG_MUSSP,B2MG_MOUSE,B2MG_MUSCE,B2MG_MUSCR	-0.797098	0.000166277	0.00132348	2.42028e-05
Q8BFR4	Gns	N-acetylglucosamine-6-sulfatase	GNS_MOUSE	-0.471388	0.000167446	0.00132981	1.84896e-05
Q7TQA1	Igsf1	Immunoglobulin superfamily member 1	IGSF1_MOUSE	-1.55303	0.000167867	0.00132981	1.70178e-05
Q01730;Q15404	Rsu1;RSU1	Ras suppressor protein 1	RSU1_MOUSE;RSU1_HUMAN	-0.372806	0.000168063	0.00132981	5.15169e-05
Q9JHG6	Rcan1	Calcipressin-1	RCAN1_MOUSE	0.517017	0.000168178	0.00132981	3.57707e-05
P16045	Lgals1	Galectin-1	LEG1_MOUSE	-1.31677	0.000168239	0.00132981	6.51543e-05
Q62470	Itga3	Integrin alpha-3	ITA3_MOUSE	-1.38131	0.000168961	0.00133195	4.80295e-06
Q80YD1	Supv3l1	ATP-dependent RNA helicase SUPV3L1, mitochondrial	SUV3_MOUSE	0.603388	0.000168977	0.00133195	2.44703e-05
Q80X90	Flnb	Filamin-B	FLNB_MOUSE	-0.641627	0.000169321	0.00133248	1.64869e-05
Q80YX1	Tnc	Tenascin	TENA_MOUSE	1.08812	0.000169512	0.00133248	1.47238e-05
Q920M7	Syt17	Synaptotagmin-17	SYT17_MOUSE	2.12554	0.000170583	0.00133905	2.027e-05
Q9EQH2	Erap1	Endoplasmic reticulum aminopeptidase 1	ERAP1_MOUSE	-1.43245	0.000171171	0.00133939	4.10997e-06
Q91Z53	Grhpr	Glyoxylate reductase/hydroxypyruvate reductase	GRHPR_MOUSE	-0.648986	0.000171287	0.00133939	0.000370702
Q8CFV9	Rfk	Riboflavin kinase	RIFK_MOUSE	-0.656592	0.000171332	0.00133939	3.08018e-05
Q62241	Snrpc	U1 small nuclear ribonucleoprotein C	RU1C_MOUSE	0.637616	0.000173961	0.00135809	3.53406e-05
Q80ZJ1	Rap2a	Ras-related protein Rap-2a	RAP2A_MOUSE	0.457602	0.000174584	0.00136109	0.000159119
P11881	Itpr1	Inositol 1,4,5-trisphosphate receptor type 1	ITPR1_MOUSE	1.33752	0.000177133	0.00137622	0.000128445
Q5GH67	Xkr4	XK-related protein 4	XKR4_MOUSE	1.13845	0.000177377	0.00137622	2.16375e-05
Q62087	Pon3	Serum paraoxonase/lactonase 3	PON3_MOUSE	-0.92765	0.00017742	0.00137622	6.21931e-06
Q8BIG7	Comtd1	Catechol O-methyltransferase domain-containing protein 1	CMTD1_MOUSE	-0.584863	0.000177491	0.00137622	7.70819e-05
Q9R049	Amfr	E3 ubiquitin-protein ligase AMFR	AMFR_MOUSE	0.488288	0.000178054	0.00137871	8.67351e-06
Q3V1L4	Nt5c2	Cytosolic purine 5'-nucleotidase	5NTC_MOUSE	-0.672177	0.000179089	0.00138484	4.6184e-05
Q8R4R6	Nup35	Nucleoporin NUP35	NUP35_MOUSE	0.72356	0.000180461	0.00139331	9.09976e-06
Q7TNG5	Eml2	Echinoderm microtubule-associated protein-like 2	EMAL2_MOUSE	-1.27053	0.000180673	0.00139331	8.29751e-05
Q61644	Pacsin1	Protein kinase C and casein kinase substrate in neurons protein 1	PACN1_MOUSE	0.515518	0.000181491	0.00139772	0.00088034
P42208	Septin2	Septin-2	SEPT2_MOUSE	-0.601101	0.000181782	0.00139808	0.000108465
P62141	Ppp1cb	Serine/threonine-protein phosphatase PP1-beta catalytic subunit	PP1B_MOUSE	0.47065	0.000183969	0.00141177	0.000359142
Q6NVF9	Cpsf6	Cleavage and polyadenylation specificity factor subunit 6	CPSF6_MOUSE	1.14632	0.000184058	0.00141177	6.31466e-05
Q80TH2	Erbin	Erbin	ERBIN_MOUSE	1.45178	0.000184452	0.00141278	2.58058e-05
Q8BVE3	Atp6v1h	V-type proton ATPase subunit H	VATH_MOUSE	0.291441	0.000184685	0.00141278	0.000434267
Q9Z2W8	Gria4	Glutamate receptor 4	GRIA4_MOUSE	-1.14406	0.000185533	0.00141584	2.11969e-05
Q9EQG7	Enpp5	Ectonucleotide pyrophosphatase/phosphodiesterase family member 5	ENPP5_MOUSE	-0.372415	0.000185582	0.00141584	9.10902e-06
Q91YL2	Rnf126	E3 ubiquitin-protein ligase RNF126	RN126_MOUSE	0.451594	0.000185896	0.00141634	4.92299e-05
Q5FWK3	Arhgap1	Rho GTPase-activating protein 1	RHG01_MOUSE	0.414876	0.000186935	0.00142231	0.000201969
Q9EQ20	Aldh6a1	Methylmalonate-semialdehyde dehydrogenase [acylating], mitochondrial	MMSA_MOUSE	-0.475809	0.000187179	0.00142231	0.000407036
Q8R4G0	Ntng1	Netrin-G1	NTNG1_MOUSE	1.17521	0.000187806	0.00142517	2.0373e-05
P24270	Cat	Catalase	CATA_MOUSE	-0.785617	0.0001894	0.00143508	6.10907e-05
P56528	Cd38	ADP-ribosyl cyclase/cyclic ADP-ribose hydrolase 1	CD38_MOUSE	-2.84328	0.000189615	0.00143508	5.16368e-05
Q8JZL3	Thtpa	Thiamine-triphosphatase	THTPA_MOUSE	-0.332727	0.000192787	0.00145575	1.67425e-05
Q91VK4	Itm2c	Integral membrane protein 2C	ITM2C_MOUSE	0.393967	0.000193229	0.00145575	5.15861e-05
Q8BI08	Mal2	Protein MAL2	MAL2_MOUSE	0.506051	0.000193328	0.00145575	0.000658656
Q8VHL0,P97689	Slc14a1	Urea transporter 1	UT1_MOUSE,UT1_RAT	-1.68438	0.000193368	0.00145575	2.01177e-05
Q9D415	Dlgap1	Disks large-associated protein 1	DLGP1_MOUSE	0.725847	0.000194512	0.00146244	1.81784e-05
Q9CRB8	Mtfp1	Mitochondrial fission process protein 1	MTFP1_MOUSE	-0.321494	0.00019509	0.00146358	5.45982e-05
Q64727	Vcl	Vinculin	VINC_MOUSE	-0.908666	0.000195178	0.00146358	0.000127127
Q8BGT6	Micall1	MICAL-like protein 1	MILK1_MOUSE	-0.971578	0.000195898	0.00146637	5.35667e-06
Q9D710	Tmx2	Thioredoxin-related transmembrane protein 2	TMX2_MOUSE	-0.721801	0.000196065	0.00146637	0.000146486
P62484	Abi2	Abl interactor 2	ABI2_MOUSE	0.988286	0.000197071	0.00147196	0.000154316
Q8CGE9	Rgs12	Regulator of G-protein signaling 12	RGS12_MOUSE	1.40697	0.000197502	0.00147325	1.58922e-06
Q80YF9	Arhgap33	Rho GTPase-activating protein 33	RHG33_MOUSE	2.49911	0.000198067	0.00147553	2.90615e-06
Q9ET80	Jph1	Junctophilin-1	JPH1_MOUSE	2.57625	0.000199912	0.00148733	2.03015e-06
Q62132	Ptprr	Receptor-type tyrosine-protein phosphatase R	PTPRR_MOUSE	1.90658	0.000200313	0.00148837	3.1132e-06
Q7TSK2	Sez6	Seizure protein 6	SEZ6_MOUSE	2.75729	0.000200685	0.0014892	8.76637e-06
Q8BPN8	Dmxl2	DmX-like protein 2	DMXL2_MOUSE	0.446564	0.0002024	0.00149997	0.000222082
Q8R0G7	Spns1	Protein spinster homolog 1	SPNS1_MOUSE	-0.423827	0.000203105	0.0015016	1.00402e-05
Q8BSS9	Ppfia2	Liprin-alpha-2	LIPA2_MOUSE	0.565902	0.000203146	0.0015016	3.71953e-05
P48057,P31648	Slc6a1	Sodium- and chloride-dependent GABA transporter 1	SC6A1_MUSCO,SC6A1_MOUSE	-0.995608	0.000203608	0.00150306	0.000312696
Q8R081	Hnrnpl	Heterogeneous nuclear ribonucleoprotein L	HNRPL_MOUSE	0.966759	0.000205989	0.00151712	0.000177604
Q8VD65	Pik3r4	Phosphoinositide 3-kinase regulatory subunit 4	PI3R4_MOUSE	0.247519	0.000206515	0.00151712	2.71085e-05
Q8VBX6	Mpdz	Multiple PDZ domain protein	MPDZ_MOUSE	-0.545523	0.000206531	0.00151712	9.50089e-06
Q6P5F6	Slc39a10	Zinc transporter ZIP10	S39AA_MOUSE	0.520586	0.000206577	0.00151712	4.96775e-05
P63321	Rala	Ras-related protein Ral-A	RALA_MOUSE	-0.428374	0.000207312	0.00151867	0.000331823
Q8CH09	Sugp2	SURP and G-patch domain-containing protein 2	SUGP2_MOUSE	0.6357	0.000207322	0.00151867	1.17037e-05
Q8R5H6	Wasf1	Wiskott-Aldrich syndrome protein family member 1	WASF1_MOUSE	1.18703	0.000208997	0.00152898	0.000140289
P31938	Map2k1	Dual specificity mitogen-activated protein kinase kinase 1	MP2K1_MOUSE	0.341183	0.000210107	0.0015349	0.000566437
Q922P8	Tmem132a	Transmembrane protein 132A	T132A_MOUSE	1.22524	0.000210345	0.0015349	1.13862e-05
P50544	Acadvl	Very long-chain specific acyl-CoA dehydrogenase, mitochondrial	ACADV_MOUSE	-0.45813	0.000211259	0.0015396	7.69387e-05
Q80ZD8	Amigo1	Amphoterin-induced protein 1	AMGO1_MOUSE	0.991007	0.000213186	0.00155165	6.52408e-06
P63089	Ptn	Pleiotrophin	PTN_MOUSE	0.923667	0.00021363	0.0015529	3.82466e-05
Q64314	Cd34	Hematopoietic progenitor cell antigen CD34	CD34_MOUSE	0.757597	0.0002152	0.00156233	1.49863e-05
Q76LS9	Mindy1	Ubiquitin carboxyl-terminal hydrolase MINDY-1	MINY1_MOUSE	-0.813997	0.000215884	0.00156529	3.26949e-05
Q8BWL5	Rbms3	RNA-binding motif, single-stranded-interacting protein 3	RBMS3_MOUSE	-1.69094	0.000216382	0.00156691	4.98899e-06
Q8BVL9	Jakmip1	Janus kinase and microtubule-interacting protein 1	JKIP1_MOUSE	1.1588	0.000219426	0.00158694	3.4281e-05
Q64133	Maoa	Amine oxidase [flavin-containing] A	AOFA_MOUSE	-0.396893	0.000220352	0.00159162	0.000289093
Q61481	Pde1a	Calcium/calmodulin-dependent 3',5'-cyclic nucleotide phosphodiesterase 1A	PDE1A_MOUSE	0.767356	0.000221741	0.00159963	0.000402521
Q811U3,Q99MI1	Erc1	ELKS/Rab6-interacting/CAST family member 1	RB6I2_RAT,RB6I2_MOUSE	0.707294	0.000222368	0.00160211	0.000116278
Q6PDN3	Mylk	Myosin light chain kinase, smooth muscle	MYLK_MOUSE	-2.18273	0.000222879	0.00160377	3.47169e-05
Q9ESN9	Mapk8ip3	C-Jun-amino-terminal kinase-interacting protein 3	JIP3_MOUSE	-0.256135	0.000223409	0.00160411	9.33529e-05
P18242	Ctsd	Cathepsin D	CATD_MOUSE	-0.401121	0.000223489	0.00160411	0.0002335
O35295	Purb	Transcriptional activator protein Pur-beta	PURB_MOUSE	0.664404	0.000223889	0.00160496	0.000113805
Q8C170	Myo9a	Unconventional myosin-IXa	MYO9A_MOUSE	0.421632	0.000224427	0.00160679	3.01998e-06
P51125	Cast	Calpastatin	ICAL_MOUSE	-0.950494	0.000226357	0.00161858	1.41942e-05
Q3UFK8	Frmd8	FERM domain-containing protein 8	FRMD8_MOUSE	-1.27545	0.000227549	0.00162507	8.68541e-06
Q9QYJ0	Dnaja2	DnaJ homolog subfamily A member 2	DNJA2_MOUSE	0.197066	0.000228815	0.00163206	0.00025193
P63086,P63085	Mapk1	Mitogen-activated protein kinase 1	MK01_RAT,MK01_MOUSE	0.586308	0.000230359	0.00164102	0.000575766
P18826	Phka1	Phosphorylase b kinase regulatory subunit alpha, skeletal muscle isoform	KPB1_MOUSE	-0.779277	0.000231546	0.00164742	1.1747e-05
Q91ZH7	Abhd3	Phospholipase ABHD3	ABHD3_MOUSE	-0.822958	0.000235781	0.00167415	1.31835e-05
A2AQ25	Skt	Sickle tail protein	SKT_MOUSE	0.777986	0.000235891	0.00167415	3.32928e-05
Q9DBG7	Srpra	Signal recognition particle receptor subunit alpha	SRPRA_MOUSE	-0.612952	0.000236888	0.0016778	2.72659e-06
O08582	Gtpbp1	GTP-binding protein 1	GTPB1_MOUSE	0.460746	0.000236995	0.0016778	2.8474e-05
Q07076	Anxa7	Annexin A7	ANXA7_MOUSE	0.350284	0.000237748	0.00168105	0.000133592
Q9CXJ1	Ears2	Probable glutamate--tRNA ligase, mitochondrial	SYEM_MOUSE	0.841931	0.000238425	0.00168233	7.22702e-06
Q8C522	Endod1	Endonuclease domain-containing 1 protein	ENDD1_MOUSE	-1.19318	0.000238519	0.00168233	0.000234011
Q03141	Mark3	MAP/microtubule affinity-regulating kinase 3	MARK3_MOUSE	0.475346	0.000239203	0.00168472	7.35271e-05
P59808	Sash1	SAM and SH3 domain-containing protein 1	SASH1_MOUSE	-1.30978	0.000239449	0.00168472	1.08586e-05
Q8BM65	Nyap2	Neuronal tyrosine-phosphorylated phosphoinositide-3-kinase adapter 2	NYAP2_MOUSE	1.36176	0.000240731	0.00169164	5.46486e-06
P02468	Lamc1	Laminin subunit gamma-1	LAMC1_MOUSE	-1.12034	0.000241616	0.00169459	7.95463e-05
P41234	Abca2	ATP-binding cassette sub-family A member 2	ABCA2_MOUSE	-1.18558	0.000241773	0.00169459	7.55562e-06
P0C7L0	Wipf3	WAS/WASL-interacting protein family member 3	WIPF3_MOUSE	1.53537	0.000242042	0.00169459	0.000117348
P60469	Ppfia3	Liprin-alpha-3	LIPA3_MOUSE	0.426664	0.000243636	0.00170366	0.000178141
Q7M750	Opalin	Opalin	OPALI_MOUSE	-0.914573	0.000244552	0.00170797	0.000206586
P11031	Sub1	Activated RNA polymerase II transcriptional coactivator p15	TCP4_MOUSE	1.55935	0.000245945	0.0017156	6.97065e-05
Q8R191	Syngr3	Synaptogyrin-3	SNG3_MOUSE	0.377588	0.000247533	0.00172456	0.00109305
Q3TWW8	Srsf6	Serine/arginine-rich splicing factor 6	SRSF6_MOUSE	0.40866	0.000250175	0.00174084	2.67962e-05
Q8BJD1	Itih5	Inter-alpha-trypsin inhibitor heavy chain H5	ITIH5_MOUSE	-1.0547	0.000251627	0.00174671	5.6235e-06
Q61753	Phgdh	D-3-phosphoglycerate dehydrogenase	SERA_MOUSE	-0.285206	0.000251632	0.00174671	0.00042873
Q811U4	Mfn1	Mitofusin-1	MFN1_MOUSE	-0.659644	0.000253231	0.00175568	3.57005e-06
Q8CGM1	Adgrb2	Adhesion G protein-coupled receptor B2	AGRB2_MOUSE	1.50716	0.000254353	0.00175681	1.21596e-05
P26039	Tln1	Talin-1	TLN1_MOUSE	-0.272313	0.000254587	0.00175681	8.57834e-05
P84099	Rpl19	60S ribosomal protein L19	RL19_MOUSE	0.802528	0.000254623	0.00175681	0.000134309
Q9WVH9	Fbln5	Fibulin-5	FBLN5_MOUSE	-2.64089	0.000254628	0.00175681	4.21224e-05
Q80TT2	Baiap3	BAI1-associated protein 3	BAIP3_MOUSE	-0.935047	0.000255498	0.00176068	2.87646e-05
Q99M71	Epdr1	Mammalian ependymin-related protein 1	EPDR1_MOUSE	-0.808153	0.00025777	0.00177411	0.000164412
Q8BGG7	Ubash3b	Ubiquitin-associated and SH3 domain-containing protein B	UBS3B_MOUSE	-0.829422	0.000258168	0.00177411	7.55101e-06
Q9DBC7	Prkar1a	cAMP-dependent protein kinase type I-alpha regulatory subunit	KAP0_MOUSE	-0.388556	0.000258617	0.00177411	0.000165497
Q9ES28	Arhgef7	Rho guanine nucleotide exchange factor 7	ARHG7_MOUSE	0.272514	0.000258692	0.00177411	8.29027e-05
Q925N0	Sfxn5	Sideroflexin-5	SFXN5_MOUSE	-0.633202	0.000259423	0.00177699	0.00040448
P32848	Pvalb	Parvalbumin alpha	PRVA_MOUSE	-3.42034	0.000263126	0.00179844	0.000386111
A2A699	Fam171a2	Protein FAM171A2	F1712_MOUSE	0.554862	0.000263186	0.00179844	4.16537e-05
Q8BGX2	Timm29	Mitochondrial import inner membrane translocase subunit Tim29	TIM29_MOUSE	0.325404	0.000265656	0.00181314	7.63328e-05
P60840	Ensa	Alpha-endosulfine	ENSA_MOUSE	0.595263	0.00026627	0.00181421	0.000144692
O88952	Lin7c	Protein lin-7 homolog C	LIN7C_MOUSE	-0.42055	0.000266514	0.00181421	0.000213442
Q9JKF1	Iqgap1	Ras GTPase-activating-like protein IQGAP1	IQGA1_MOUSE	-0.536784	0.000266844	0.00181421	9.90867e-06
P99029	Prdx5	Peroxiredoxin-5, mitochondrial	PRDX5_MOUSE	-0.317207	0.000267086	0.00181421	0.00194874
Q60648	Gm2a	Ganglioside GM2 activator	SAP3_MOUSE	-0.374712	0.000268061	0.00181867	1.52822e-05
Q8K1S3	Unc5b	Netrin receptor UNC5B	UNC5B_MOUSE	-1.47934	0.000269408	0.00182165	1.24326e-06
Q64105	Spr	Sepiapterin reductase	SPRE_MOUSE	-0.416116	0.00026944	0.00182165	0.000210706
Q9CWD3	Nudt17	Nucleoside diphosphate-linked moiety X motif 17	NUD17_MOUSE	-0.953403	0.00026946	0.00182165	4.22941e-06
P18653	Rps6ka1	Ribosomal protein S6 kinase alpha-1	KS6A1_MOUSE	-0.775655	0.000270627	0.00182737	4.27668e-06
Q8BL06	Usp54	Inactive ubiquitin carboxyl-terminal hydrolase 54	UBP54_MOUSE	-0.84908	0.000271448	0.00183075	5.33941e-06
Q501J6	Ddx17	Probable ATP-dependent RNA helicase DDX17	DDX17_MOUSE	0.882977	0.000272302	0.00183434	0.00015703
Q9CWD8	Nubpl	Iron-sulfur protein NUBPL	NUBPL_MOUSE	0.611161	0.00027314	0.00183781	1.3965e-05
P97427	Crmp1	Dihydropyrimidinase-related protein 1	DPYL1_MOUSE	0.460667	0.000273986	0.00184048	0.000880961
Q60610	Tiam1	T-lymphoma invasion and metastasis-inducing protein 1	TIAM1_MOUSE	2.02847	0.000274183	0.00184048	2.16393e-06
Q3UH60	Dip2b	Disco-interacting protein 2 homolog B	DIP2B_MOUSE	-0.485325	0.000276895	0.0018565	6.74938e-05
Q9R062	Gyg1	Glycogenin-1	GLYG_MOUSE	-0.952218	0.000277506	0.00185841	5.65002e-05
Q9JLJ2	Aldh9a1	4-trimethylaminobutyraldehyde dehydrogenase	AL9A1_MOUSE	-0.590248	0.000278134	0.00185924	0.00014689
A2AHG0	Lzts3	Leucine zipper putative tumor suppressor 3	LZTS3_MOUSE	3.13801	0.000278283	0.00185924	1.27883e-05
Q8VDP4	Ccar2	Cell cycle and apoptosis regulator protein 2	CCAR2_MOUSE	0.513232	0.000280812	0.00187394	3.39455e-05
Q9JMC3	Dnaja4	DnaJ homolog subfamily A member 4	DNJA4_MOUSE	0.470176	0.000282226	0.00188117	2.96928e-05
Q6PE01	Snrnp40	U5 small nuclear ribonucleoprotein 40 kDa protein	SNR40_MOUSE	0.785827	0.00028327	0.00188593	1.3966e-05
Q9R0Q6	Arpc1a	Actin-related protein 2/3 complex subunit 1A	ARC1A_MOUSE	0.744076	0.000283717	0.0018867	0.000474216
Q3TLP5	Echdc2	Enoyl-CoA hydratase domain-containing protein 2, mitochondrial	ECHD2_MOUSE	-1.26636	0.000285541	0.00189662	3.26891e-06
Q9D0S9	Hint2	Histidine triad nucleotide-binding protein 2, mitochondrial	HINT2_MOUSE	-0.243109	0.000287613	0.00190785	0.000177072
Q3UHG7	Dennd11	DENN domain-containing protein 11	DEN11_MOUSE	-0.828353	0.000287901	0.00190785	1.64215e-05
Q8K1C0	Angel2	Protein angel homolog 2	ANGE2_MOUSE	0.87897	0.000288714	0.00191101	7.03023e-06
O89029	Matn4	Matrilin-4	MATN4_MOUSE	1.25659	0.000290901	0.00192325	1.96093e-06
Q6PD03	Ppp2r5a	Serine/threonine-protein phosphatase 2A 56 kDa regulatory subunit alpha isoform	2A5A_MOUSE	0.713033	0.00029135	0.00192399	3.21214e-05
Q9CX86	Hnrnpa0	Heterogeneous nuclear ribonucleoprotein A0	ROA0_MOUSE	1.03785	0.000292107	0.00192676	0.000106815
Q9JJY3	Smpd3	Sphingomyelin phosphodiesterase 3	NSMA2_MOUSE	0.793445	0.000297813	0.00196213	0.000108696
P56388	Cartpt	Cocaine- and amphetamine-regulated transcript protein	CART_MOUSE	-0.821703	0.000299119	0.00196845	2.77315e-05
O35598	Adam10	Disintegrin and metalloproteinase domain-containing protein 10	ADA10_MOUSE	-0.629504	0.000300456	0.00197497	4.50175e-05
Q64332	Syn2	Synapsin-2	SYN2_MOUSE	0.618051	0.00030209	0.00198139	0.00103936
P54285	Cacnb3	Voltage-dependent L-type calcium channel subunit beta-3	CACB3_MOUSE	0.551322	0.000302128	0.00198139	3.28397e-05
O88291	Znf326	DBIRD complex subunit ZNF326	ZN326_MOUSE	0.736795	0.000304313	0.00199203	1.55563e-05
Q8C561	Lmbrd2	G-protein coupled receptor-associated protein LMBRD2	LMBD2_MOUSE	0.383378	0.000304449	0.00199203	1.24416e-05
P16054	Prkce	Protein kinase C epsilon type	KPCE_MOUSE	0.899169	0.000305957	0.00199732	9.47741e-05
P97393	Arhgap5	Rho GTPase-activating protein 5	RHG05_MOUSE	-0.285111	0.000305958	0.00199732	3.91172e-05
Q61672	Slc29a2	Equilibrative nucleoside transporter 2	S29A2_MOUSE	-0.494544	0.000307096	0.0020016	2.04441e-05
P63032	Rasd2	GTP-binding protein Rhes	RHES_MOUSE	4.42804	0.000307466	0.0020016	7.90052e-06
Q80U28	Madd	MAP kinase-activating death domain protein	MADD_MOUSE	0.328993	0.000307668	0.0020016	8.95051e-05
O55106	Strn	Striatin	STRN_MOUSE	1.3554	0.000308692	0.00200597	0.00011955
Q8K209	Adgrg1	Adhesion G-protein coupled receptor G1	AGRG1_MOUSE	-0.830516	0.000310618	0.00201449	1.8216e-05
Q9EQX4	Aif1l	Allograft inflammatory factor 1-like	AIF1L_MOUSE	-1.07758	0.00031071	0.00201449	8.24529e-06
P49813	Tmod1	Tropomodulin-1	TMOD1_MOUSE	0.348877	0.000313519	0.00202895	0.000145664
Q8K4P8	Hecw1	E3 ubiquitin-protein ligase HECW1	HECW1_MOUSE	0.374618	0.000313653	0.00202895	3.36127e-06
Q05CL8	Larp7	La-related protein 7	LARP7_MOUSE	0.735638	0.000314212	0.00203026	5.83457e-06
B2RUR8	Otud7b	OTU domain-containing protein 7B	OTU7B_MOUSE	-0.856128	0.000315325	0.00203515	8.21899e-06
Q91VT4	Cbr4	Carbonyl reductase family member 4	CBR4_MOUSE	0.707459	0.000315788	0.00203583	5.42467e-05
Q5SU73	Coil	Coilin	COIL_MOUSE	0.594403	0.000316205	0.00203622	5.07636e-06
Q9ERG2	Strn3	Striatin-3	STRN3_MOUSE	0.445631	0.000316901	0.0020384	3.95027e-05
Q99NB1	Acss1	Acetyl-coenzyme A synthetase 2-like, mitochondrial	ACS2L_MOUSE	-0.482363	0.000318225	0.00204338	3.64216e-05
Q6DIC0	Smarca2	Probable global transcription activator SNF2L2	SMCA2_MOUSE	1.00636	0.000318393	0.00204338	1.40799e-05
Q91Y86	Mapk8	Mitogen-activated protein kinase 8	MK08_MOUSE	0.419517	0.000319068	0.00204455	1.50293e-05
Q63918	Cavin2	Caveolae-associated protein 2	CAVN2_MOUSE	-0.913377	0.000319293	0.00204455	8.5828e-06
P61458	Pcbd1	Pterin-4-alpha-carbinolamine dehydratase	PHS_MOUSE	-0.433874	0.000320471	0.00204979	9.0436e-05
Q61425	Hadh	Hydroxyacyl-coenzyme A dehydrogenase, mitochondrial	HCDH_MOUSE	-0.604103	0.000321139	0.00205176	0.000209255
Q9ESE1	Lrba	Lipopolysaccharide-responsive and beige-like anchor protein	LRBA_MOUSE	1.23787	0.000322587	0.00205871	8.66987e-06
O88703	Hcn2	Potassium/sodium hyperpolarization-activated cyclic nucleotide-gated channel 2	HCN2_MOUSE	-1.40088	0.000322955	0.00205871	0.00012043
Q9CRA7	Dmac2l	ATP synthase subunit s, mitochondrial	ATP5S_MOUSE	-0.359395	0.00032331	0.00205871	5.73377e-05
Q9Z351	Kcnq2	Potassium voltage-gated channel subfamily KQT member 2	KCNQ2_MOUSE	0.744203	0.000323868	0.00205996	2.38828e-05
O89051	Itm2b	Integral membrane protein 2B	ITM2B_MOUSE	-0.455478	0.000325151	0.00206503	7.61139e-05
Q7TSH4	Ccp110	Centriolar coiled-coil protein of 110 kDa	CP110_MOUSE	-0.713503	0.00032539	0.00206503	3.25235e-06
Q5H8C4	Vps13a	Vacuolar protein sorting-associated protein 13A	VP13A_MOUSE	0.246025	0.000326011	0.00206667	3.4239e-05
Q7TPM9	Mtmr10	Myotubularin-related protein 10	MTMRA_MOUSE	-1.66689	0.000327016	0.00207074	2.54011e-06
P70205	Adcyap1r1	Pituitary adenylate cyclase-activating polypeptide type I receptor	PACR_MOUSE	-0.651565	0.000327661	0.00207252	4.07634e-05
Q61656	Ddx5	Probable ATP-dependent RNA helicase DDX5	DDX5_MOUSE	1.32591	0.000328256	0.00207398	0.00013074
Q80UG5	Septin9	Septin-9	SEPT9_MOUSE	0.883795	0.000329539	0.00207946	0.000110531
Q5SVL6	Rap1gap2	Rap1 GTPase-activating protein 2	RPGP2_MOUSE	0.678483	0.000329853	0.00207946	0.000169018
O70572	Smpd2	Sphingomyelin phosphodiesterase 2	NSMA_MOUSE	-0.707389	0.0003306	0.00208187	8.80809e-06
Q99P72	Rtn4	Reticulon-4	RTN4_MOUSE	-0.424622	0.000331515	0.00208532	0.000492991
Q69Z26	Cntn4	Contactin-4	CNTN4_MOUSE	0.617312	0.000332596	0.00208826	2.73603e-05
Q80XU8	Lrfn4	Leucine-rich repeat and fibronectin type-III domain-containing protein 4	LRFN4_MOUSE	0.673036	0.000332715	0.00208826	1.1734e-05
Q8K4D3;Q7Z2H8	Slc36a1;SLC36A1	Proton-coupled amino acid transporter 1	S36A1_MOUSE;S36A1_HUMAN	-0.76874	0.000333838	0.00209159	3.69828e-06
Q9Z2S7	Tsc22d3	TSC22 domain family protein 3	T22D3_MOUSE	-1.11569	0.000334262	0.00209159	5.65959e-05
Q8K479	C1qtnf5	Complement C1q tumor necrosis factor-related protein 5	C1QT5_MOUSE	-1.32368	0.000334767	0.00209159	8.59047e-06
O08749	Dld	Dihydrolipoyl dehydrogenase, mitochondrial	DLDH_MOUSE	0.211873	0.000335027	0.00209159	0.00124731
O88712	Ctbp1	C-terminal-binding protein 1	CTBP1_MOUSE	0.352571	0.00033508	0.00209159	0.000308061
O35488	Slc27a2	Very long-chain acyl-CoA synthetase	S27A2_MOUSE	-0.976846	0.000337224	0.00210267	1.195e-05
O88507	Cntfr	Ciliary neurotrophic factor receptor subunit alpha	CNTFR_MOUSE	-0.242383	0.000337812	0.00210403	5.75901e-05
P45591	Cfl2	Cofilin-2	COF2_MOUSE	-0.996409	0.000338813	0.00210615	0.000377863
Q9CQ85	Timm22	Mitochondrial import inner membrane translocase subunit Tim22	TIM22_MOUSE	0.338267	0.000338891	0.00210615	7.91697e-05
Q8R4U7	Luzp1	Leucine zipper protein 1	LUZP1_MOUSE	-0.997639	0.000339715	0.0021073	1.60157e-05
Q9D0D3	Mtpap	Poly(A) RNA polymerase, mitochondrial	PAPD1_MOUSE	0.264672	0.000339815	0.0021073	3.5469e-06
O70503	Hsd17b12	Very-long-chain 3-oxoacyl-CoA reductase	DHB12_MOUSE	-0.609331	0.000341248	0.002112	5.46041e-05
Q61738	Itga7	Integrin alpha-7	ITA7_MOUSE	-1.27363	0.000341315	0.002112	6.09268e-06
Q91WA3	Hdac11	Histone deacetylase 11	HDA11_MOUSE	-0.659919	0.000344843	0.00213031	3.99459e-05
P83870	Phf5a	PHD finger-like domain-containing protein 5A	PHF5A_MOUSE	0.368128	0.000345022	0.00213031	2.03219e-05
P15209	Ntrk2	BDNF/NT-3 growth factors receptor	NTRK2_MOUSE	0.310902	0.000350024	0.00215886	4.76478e-05
Q9DBG5	Plin3	Perilipin-3	PLIN3_MOUSE	-1.3905	0.000350646	0.00216036	3.47396e-05
Q9D2V7	Coro7	Coronin-7	CORO7_MOUSE	1.28785	0.000355975	0.0021898	4.64502e-05
Q3TYS2	Cybc1	Cytochrome b-245 chaperone 1	CYBC1_MOUSE	-0.854353	0.000356194	0.0021898	1.50429e-05
Q8CDN6	Txnl1	Thioredoxin-like protein 1	TXNL1_MOUSE	-0.433431	0.000356699	0.00219054	0.000228017
Q9WTS5	Tenm2	Teneurin-2	TEN2_MOUSE	0.500304	0.000357957	0.00219591	0.000563178
Q80XD1	Chn2	Beta-chimaerin	CHIO_MOUSE	0.667289	0.000359038	0.00219937	9.65952e-06
Q8BHL5	Elmo2	Engulfment and cell motility protein 2	ELMO2_MOUSE	0.464463	0.000359479	0.00219937	3.18288e-05
Q8BU33	Ilvbl	Acetolactate synthase-like protein	ILVBL_MOUSE	-0.619924	0.00035968	0.00219937	2.05122e-05
Q5SQX6	Cyfip2	Cytoplasmic FMR1-interacting protein 2	CYFP2_MOUSE	1.02261	0.000362077	0.00221166	0.000150151
Q7TPD3	Robo2	Roundabout homolog 2	ROBO2_MOUSE	0.9942	0.000363806	0.00221984	2.54247e-05
Q60875	Arhgef2	Rho guanine nucleotide exchange factor 2	ARHG2_MOUSE	0.519545	0.000364348	0.00222054	9.60863e-05
Q80U23	Snph	Syntaphilin	SNPH_MOUSE	-0.54921	0.000364924	0.00222054	8.38133e-05
Q6PGF7	Exoc8	Exocyst complex component 8	EXOC8_MOUSE	0.347203	0.000365176	0.00222054	6.2296e-05
Q7TPD2	Fam185a	Protein FAM185A	F185A_MOUSE	-0.744942	0.000365587	0.00222054	6.07014e-06
Q3UPF5	Zc3hav1	Zinc finger CCCH-type antiviral protein 1	ZCCHV_MOUSE	-2.7676	0.000365869	0.00222054	6.84126e-07
P18654	Rps6ka3	Ribosomal protein S6 kinase alpha-3	KS6A3_MOUSE	0.451211	0.000368201	0.00223232	9.59944e-06
Q61292	Lamb2	Laminin subunit beta-2	LAMB2_MOUSE	-1.14205	0.000369939	0.00223984	8.7984e-05
Q9JHI5	Ivd	Isovaleryl-CoA dehydrogenase, mitochondrial	IVD_MOUSE	-0.488589	0.00037053	0.00223984	0.000240591
P47738	Aldh2	Aldehyde dehydrogenase, mitochondrial	ALDH2_MOUSE	-0.344475	0.000370673	0.00223984	0.000553134
P28663	Napb	Beta-soluble NSF attachment protein	SNAB_MOUSE	0.356084	0.000371708	0.00223984	0.000420997
Q920N7	Syt12	Synaptotagmin-12	SYT12_MOUSE	-0.449134	0.00037174	0.00223984	8.57776e-05
Q9ERU9	Ranbp2	E3 SUMO-protein ligase RanBP2	RBP2_MOUSE	0.709939	0.0003718	0.00223984	8.58919e-06
P84091	Ap2m1	AP-2 complex subunit mu	AP2M1_MOUSE	0.661523	0.000374201	0.00225002	0.00114666
Q3UYG8	Macrod2	ADP-ribose glycohydrolase MACROD2	MACD2_MOUSE	0.412556	0.000374575	0.00225002	5.88548e-05
P13595	Ncam1	Neural cell adhesion molecule 1	NCAM1_MOUSE	-0.257745	0.000375128	0.00225002	0.00176683
Q9CZP5	Bcs1l	Mitochondrial chaperone BCS1	BCS1_MOUSE	0.412018	0.00037531	0.00225002	4.65904e-05
Q8BGT1	Flrt3	Leucine-rich repeat transmembrane protein FLRT3	FLRT3_MOUSE	1.8355	0.00037571	0.00225002	4.80563e-06
Q99JT2	Stk26	Serine/threonine-protein kinase 26	STK26_MOUSE	0.89026	0.000375858	0.00225002	1.66208e-05
Q8BG05	Hnrnpa3	Heterogeneous nuclear ribonucleoprotein A3	ROA3_MOUSE	0.591915	0.0003764	0.00225031	0.000549291
Q8C015	Pak5	Serine/threonine-protein kinase PAK 5	PAK5_MOUSE	1.02542	0.000376697	0.00225031	6.39696e-06
O54988	Slk	STE20-like serine/threonine-protein kinase	SLK_MOUSE	0.424254	0.000378332	0.00225771	5.10901e-05
Q3TES0	Iqsec3	IQ motif and SEC7 domain-containing protein 3	IQEC3_MOUSE	-0.863119	0.000379592	0.00226286	3.5319e-05
Q8K386	Rab15	Ras-related protein Rab-15	RAB15_MOUSE	0.462336	0.000380915	0.00226837	4.38952e-05
Q80TS3	Adgrl3	Adhesion G protein-coupled receptor L3	AGRL3_MOUSE	0.494615	0.000383884	0.00228367	5.5942e-05
Q9CZH7	Mxra7	Matrix-remodeling-associated protein 7	MXRA7_MOUSE	-1.1993	0.000384991	0.00228787	7.1835e-06
Q99N91	Mrpl34	39S ribosomal protein L34, mitochondrial	RM34_MOUSE	0.494301	0.000385715	0.00228943	1.91976e-05
P62309	Snrpg	Small nuclear ribonucleoprotein G	RUXG_MOUSE	0.564767	0.000386057	0.00228943	6.38436e-05
P46638	Rab11b	Ras-related protein Rab-11B	RB11B_MOUSE	-0.288144	0.000387401	0.00229501	0.000726593
B9EJ86	Osbpl8	Oxysterol-binding protein-related protein 8	OSBL8_MOUSE	1.05957	0.000388184	0.00229726	4.16045e-05
P54830	Ptpn5	Tyrosine-protein phosphatase non-receptor type 5	PTN5_MOUSE	1.12271	0.000390471	0.0023084	0.000219049
Q62189	Snrpa	U1 small nuclear ribonucleoprotein A	SNRPA_MOUSE	0.739308	0.000390893	0.0023085	7.88143e-05
P63087	Ppp1cc	Serine/threonine-protein phosphatase PP1-gamma catalytic subunit	PP1G_MOUSE	0.762963	0.000391361	0.00230887	0.000185755
Q91W43	Gldc	Glycine dehydrogenase (decarboxylating), mitochondrial	GCSP_MOUSE	2.71467	0.000394762	0.00232652	7.83396e-06
Q922Q1	44257	Mitochondrial amidoxime reducing component 2	MARC2_MOUSE	0.676859	0.000395572	0.00232658	0.000146287
Q91V92	Acly	ATP-citrate synthase	ACLY_MOUSE	0.399381	0.000396287	0.00232658	0.000150088
Q8K353	Cystm1	Cysteine-rich and transmembrane domain-containing protein 1	CYTM1_MOUSE	-0.564122	0.000396607	0.00232658	9.29131e-05
Q04750	Top1	DNA topoisomerase 1	TOP1_MOUSE	0.730143	0.000396839	0.00232658	1.93343e-05
Q9CQV6	Map1lc3b	Microtubule-associated proteins 1A/1B light chain 3B	MLP3B_MOUSE	-0.333285	0.000397482	0.00232658	0.000778652
Q9R190	Mta2	Metastasis-associated protein MTA2	MTA2_MOUSE	1.1771	0.000397947	0.00232658	1.33305e-05
P62911	Rpl32	60S ribosomal protein L32	RL32_MOUSE	0.390589	0.000398052	0.00232658	9.98901e-05
Q8BJ71	Nup93	Nuclear pore complex protein Nup93	NUP93_MOUSE	0.466763	0.000398377	0.00232658	3.28185e-05
Q9D8L5	Ccdc91	Coiled-coil domain-containing protein 91	CCD91_MOUSE	-0.961806	0.000398446	0.00232658	3.59667e-06
Q8VCN6	Cd99	CD99 antigen	CD99_MOUSE	-0.728703	0.000399313	0.00232867	6.6738e-05
P40237	Cd82	CD82 antigen	CD82_MOUSE	-1.19661	0.000399621	0.00232867	0.000170699
Q8BH57	Wdr48	WD repeat-containing protein 48	WDR48_MOUSE	0.386495	0.000403261	0.00234748	6.54054e-05
Q8BWU8	Etnppl	Ethanolamine-phosphate phospho-lyase	AT2L1_MOUSE	-0.794891	0.000404816	0.00235292	1.98761e-05
Q07417	Acads	Short-chain specific acyl-CoA dehydrogenase, mitochondrial	ACADS_MOUSE	-0.394913	0.00040502	0.00235292	4.54548e-05
Q9D4J1	Efhd1	EF-hand domain-containing protein D1	EFHD1_MOUSE	-2.04146	0.000405861	0.00235505	4.54977e-06
P35700	Prdx1	Peroxiredoxin-1	PRDX1_MOUSE	-0.235591	0.000406214	0.00235505	0.000964527
Q9WTR1,Q9WUD2	Trpv2	Transient receptor potential cation channel subfamily V member 2	TRPV2_MOUSE,TRPV2_RAT	0.422526	0.00041068	0.00237319	2.39503e-05
Q9CZN8	Qrsl1	Glutamyl-tRNA(Gln) amidotransferase subunit A, mitochondrial	GATA_MOUSE	0.311374	0.000410754	0.00237319	1.5018e-05
P55264,Q64640	Adk	Adenosine kinase	ADK_MOUSE,ADK_RAT	-0.305918	0.000410853	0.00237319	0.000200538
P21995	Emb	Embigin	EMB_MOUSE	-1.46424	0.000411008	0.00237319	3.57455e-05
Q9R1E6	Enpp2	Ectonucleotide pyrophosphatase/phosphodiesterase family member 2	ENPP2_MOUSE	-1.44158	0.000413447	0.00238485	3.29151e-06
Q6NVE9	Pptc7	Protein phosphatase PTC7 homolog	PPTC7_MOUSE	0.426688	0.000419113	0.00241509	6.14835e-05
Q9R1J0	Nsdhl	Sterol-4-alpha-carboxylate 3-dehydrogenase, decarboxylating	NSDHL_MOUSE	-0.4876	0.000423201	0.00243423	4.76213e-06
P47856	Gfpt1	Glutamine--fructose-6-phosphate aminotransferase [isomerizing] 1	GFPT1_MOUSE	-0.462694	0.000423696	0.00243423	1.28589e-05
Q8K4J6	Mrtfa	Myocardin-related transcription factor A	MRTFA_MOUSE	1.27912	0.000423716	0.00243423	2.10724e-05
Q61809	Lrrn1	Leucine-rich repeat neuronal protein 1	LRRN1_MOUSE	-1.31814	0.000424861	0.00243762	2.87488e-06
Q80XG9	Lrrtm4	Leucine-rich repeat transmembrane neuronal protein 4	LRRT4_MOUSE	2.33393	0.000425161	0.00243762	5.09896e-06
Q9D5V5	Cul5	Cullin-5	CUL5_MOUSE	0.237473	0.00042663	0.00244358	6.94686e-05
Q8R0N6	Adhfe1	Hydroxyacid-oxoacid transhydrogenase, mitochondrial	HOT_MOUSE	-0.944469	0.000430207	0.00246146	7.46813e-06
Q8BGQ7	Aars	Alanine--tRNA ligase, cytoplasmic	SYAC_MOUSE	-0.453004	0.000430615	0.00246146	0.000143095
P48428	Tbca	Tubulin-specific chaperone A	TBCA_MOUSE	-0.364661	0.00043522	0.00248451	0.000118239
Q9D1K2	Atp6v1f	V-type proton ATPase subunit F	VATF_MOUSE	0.301351	0.000435649	0.00248451	0.000489294
Q61147	Cp	Ceruloplasmin	CERU_MOUSE	-1.14871	0.000436255	0.00248451	9.40686e-06
A2BH40	Arid1a	AT-rich interactive domain-containing protein 1A	ARI1A_MOUSE	0.831181	0.000436391	0.00248451	3.21628e-06
Q9CQY5	Magt1	Magnesium transporter protein 1	MAGT1_MOUSE	-0.8677	0.000437859	0.00249038	1.11909e-05
P62965	Crabp1	Cellular retinoic acid-binding protein 1	RABP1_MOUSE	1.23131	0.000439312	0.00249615	1.08989e-05
Q9D6M3	Slc25a22	Mitochondrial glutamate carrier 1	GHC1_MOUSE	0.775903	0.000441714	0.0025073	0.00029269
Q91X78	Erlin1	Erlin-1	ERLN1_MOUSE	1.7013	0.000445001	0.00252345	1.53567e-05
O89114	Dnajb5	DnaJ homolog subfamily B member 5	DNJB5_MOUSE	2.1343	0.000445658	0.00252466	2.11565e-06
Q9JLV1	Bag3	BAG family molecular chaperone regulator 3	BAG3_MOUSE	-1.33907	0.000446527	0.00252689	8.15237e-06
Q64487	Ptprd	Receptor-type tyrosine-protein phosphatase delta	PTPRD_MOUSE	0.298148	0.000446939	0.00252689	0.000143858
P14094	Atp1b1	Sodium/potassium-transporting ATPase subunit beta-1	AT1B1_MOUSE	-0.448289	0.000448665	0.00253413	0.0036933
Q5RJG7	Crppa	D-ribitol-5-phosphate cytidylyltransferase	ISPD_MOUSE	-0.438737	0.000449361	0.00253549	1.40157e-05
O55017	Cacna1b	Voltage-dependent N-type calcium channel subunit alpha-1B	CAC1B_MOUSE	0.978955	0.000449794	0.00253549	3.05552e-05
Q8K2K6	Agfg1	Arf-GAP domain and FG repeat-containing protein 1	AGFG1_MOUSE	0.902255	0.000454679	0.00256049	5.97725e-05
Q8BTV2	Cpsf7	Cleavage and polyadenylation specificity factor subunit 7	CPSF7_MOUSE	0.916818	0.000455382	0.00256175	2.09892e-05
Q62219	Tgfb1i1	Transforming growth factor beta-1-induced transcript 1 protein	TGFI1_MOUSE	-1.54677	0.000455802	0.00256175	8.70838e-06
Q8K2P7	Slc38a1	Sodium-coupled neutral amino acid transporter 1	S38A1_MOUSE	-1.27854	0.000457141	0.00256423	1.09299e-05
Q9R1V7	Adam23	Disintegrin and metalloproteinase domain-containing protein 23	ADA23_MOUSE	-0.763682	0.000457142	0.00256423	0.000139953
Q8VDU5	Snrk	SNF-related serine/threonine-protein kinase	SNRK_MOUSE	0.520994	0.000458395	0.00256872	7.19904e-06
Q8CAA7	Pgm2l1	Glucose 1,6-bisphosphate synthase	PGM2L_MOUSE	0.437317	0.000459922	0.0025745	0.000207796
O54818	Tpd52l1	Tumor protein D53	TPD53_MOUSE	0.546639	0.00046033	0.0025745	1.70119e-05
Q9DB72	Btbd17	BTB/POZ domain-containing protein 17	BTBDH_MOUSE	-0.659461	0.000464337	0.00259437	5.67548e-05
Q8BVG8	Nat14	N-acetyltransferase 14	NAT14_MOUSE	1.16342	0.000466823	0.0026057	2.15596e-05
Q91XV3	Basp1	Brain acid soluble protein 1	BASP1_MOUSE	0.896932	0.000468305	0.00261142	0.00125214
Q9CZJ0	Mpped2	Metallophosphoesterase MPPED2	MPPD2_MOUSE	0.747466	0.000470195	0.00261939	9.16742e-06
Q811I0	Atpaf1	ATP synthase mitochondrial F1 complex assembly factor 1	ATPF1_MOUSE	-0.258211	0.000471401	0.00262355	6.16338e-05
Q8BG67	Efr3a	Protein EFR3 homolog A	EFR3A_MOUSE	-0.559859	0.000473262	0.00263134	9.41257e-06
Q91Y20;O88689;Q91Y13	Pcdha10;Pcdha4;Pcdha7	Protocadherin alpha-10;Protocadherin alpha-4;Protocadherin alpha-7	PCDAA_MOUSE;PCDA4_MOUSE;PCDA7_MOUSE	0.609342	0.00047458	0.00263609	3.55205e-06
Q9WUA3	Pfkp	ATP-dependent 6-phosphofructokinase, platelet type	PFKAP_MOUSE	0.226829	0.000476301	0.00264307	0.000478299
O89106	Fhit	Bis(5'-adenosyl)-triphosphatase	FHIT_MOUSE	0.231336	0.000477228	0.00264565	2.98764e-05
Q4VAA7	Snx33	Sorting nexin-33	SNX33_MOUSE	0.813885	0.000479488	0.00265559	2.25582e-05
Q9Z0S6	Cldn10	Claudin-10	CLD10_MOUSE	-0.698412	0.000481969	0.00266674	7.83907e-06
Q61831	Mapk10	Mitogen-activated protein kinase 10	MK10_MOUSE	0.562099	0.00048609	0.00268693	8.42147e-05
Q8CJF9	Ago3	Protein argonaute-3	AGO3_MOUSE	0.408906	0.000489809	0.00270486	2.51125e-05
Q8R1V4	Tmed4	Transmembrane emp24 domain-containing protein 4	TMED4_MOUSE	-0.477649	0.000492394	0.00271651	2.96112e-05
P47934	Crat	Carnitine O-acetyltransferase	CACP_MOUSE	0.352121	0.000493293	0.00271884	5.91173e-05
P61148	Fgf1	Fibroblast growth factor 1	FGF1_MOUSE	-1.40379	0.00049616	0.002732	6.88829e-05
Q9JIG7	Ccdc22	Coiled-coil domain-containing protein 22	CCD22_MOUSE	-0.313972	0.000496771	0.00273268	2.14717e-05
O08644	Ephb6	Ephrin type-B receptor 6	EPHB6_MOUSE	1.38136	0.000497745	0.00273268	4.5768e-06
Q8R3I2	Mboat2	Lysophospholipid acyltransferase 2	MBOA2_MOUSE	-0.87194	0.000497862	0.00273268	1.25355e-05
Q91ZW3	Smarca5	SWI/SNF-related matrix-associated actin-dependent regulator of chromatin subfamily A member 5	SMCA5_MOUSE	0.604054	0.000498202	0.00273268	4.66929e-05
Q8C129	Lnpep	Leucyl-cystinyl aminopeptidase	LCAP_MOUSE	-0.65241	0.000498939	0.00273409	2.14413e-05
O35343	Kpna4	Importin subunit alpha-3	IMA3_MOUSE	0.215398	0.000503606	0.00275536	1.82529e-05
P27545	Cers1	Ceramide synthase 1	CERS1_MOUSE	0.832407	0.000503788	0.00275536	1.41075e-05
Q8BLV3	Slc9a7	Sodium/hydrogen exchanger 7	SL9A7_MOUSE	-0.465804	0.000504561	0.00275695	2.83184e-05
Q9CZL5	Pcbd2	Pterin-4-alpha-carbinolamine dehydratase 2	PHS2_MOUSE	-0.591568	0.000506708	0.00276603	4.13179e-05
P09055	Itgb1	Integrin beta-1	ITB1_MOUSE	-0.808696	0.000508233	0.00277169	5.8631e-05
Q9D8U8	Snx5	Sorting nexin-5	SNX5_MOUSE	-0.192305	0.000512669	0.00279321	6.03735e-05
P98200	Atp8a2	Phospholipid-transporting ATPase IB	AT8A2_MOUSE	-0.610667	0.000516986	0.00281405	1.23657e-05
P63011	Rab3a	Ras-related protein Rab-3A	RAB3A_MOUSE	0.49173	0.000518071	0.00281726	0.00179413
P59708	Sf3b6	Splicing factor 3B subunit 6	SF3B6_MOUSE	0.464274	0.00051956	0.00281865	2.24867e-05
Q8C025	Chpt1	Cholinephosphotransferase 1	CHPT1_MOUSE	-1.32808	0.000520258	0.00281865	1.27078e-05
Q504P2	Clec12a	C-type lectin domain family 12 member A	CL12A_MOUSE	-1.16019	0.000520509	0.00281865	9.35815e-06
O70378	Emc8	ER membrane protein complex subunit 8	EMC8_MOUSE	-0.269736	0.000520632	0.00281865	3.4739e-05
Q8CBY0	Gatc	Glutamyl-tRNA(Gln) amidotransferase subunit C, mitochondrial	GATC_MOUSE	0.373701	0.000521576	0.00281865	1.60051e-05
P23780	Glb1	Beta-galactosidase	BGAL_MOUSE	-0.527266	0.00052177	0.00281865	1.21894e-05
Q9CQV7	Dnajc19	Mitochondrial import inner membrane translocase subunit TIM14	TIM14_MOUSE	0.446974	0.000522035	0.00281865	3.21029e-05
Q8R123	Flad1	FAD synthase	FAD1_MOUSE	0.165763	0.000522284	0.00281865	4.58903e-05
P54797	Tango2	Transport and Golgi organization 2 homolog	TNG2_MOUSE	-0.995009	0.000523156	0.00282069	1.07335e-05
Q91WC3	Acsl6	Long-chain-fatty-acid--CoA ligase 6	ACSL6_MOUSE	-0.772579	0.000525557	0.00283095	0.000217149
B2RY56	Rbm25	RNA-binding protein 25	RBM25_MOUSE	0.745473	0.000529733	0.00285075	8.40117e-06
O55033	Nck2	Cytoplasmic protein NCK2	NCK2_MOUSE	0.565326	0.000531931	0.00285988	2.60129e-05
Q922Q8	Lrrc59	Leucine-rich repeat-containing protein 59	LRC59_MOUSE	-0.296471	0.000537356	0.00288633	8.97535e-05
P59281	Arhgap39	Rho GTPase-activating protein 39	RHG39_MOUSE	0.832891	0.000537914	0.0028866	1.18236e-05
Q8VCX5	Micu1	Calcium uptake protein 1, mitochondrial	MICU1_MOUSE	1.19715	0.000539286	0.00289124	4.12344e-05
Q91YH5	Atl3	Atlastin-3	ATLA3_MOUSE	-0.437054	0.000541142	0.00289847	2.85406e-05
Q8K382	Dennd1a	DENN domain-containing protein 1A	DEN1A_MOUSE	0.616609	0.000542247	0.00290166	9.18327e-06
Q9CWF6	Bbs2	Bardet-Biedl syndrome 2 protein homolog	BBS2_MOUSE	0.128962	0.000543364	0.00290491	2.9515e-05
Q70FJ1	Akap9	A-kinase anchor protein 9	AKAP9_MOUSE	1.57881	0.000545073	0.00291132	4.18555e-06
Q99KK1	Reep3	Receptor expression-enhancing protein 3	REEP3_MOUSE	-0.791794	0.000546969	0.0029187	6.21874e-06
Q3UUF8	Ankrd34b	Ankyrin repeat domain-containing protein 34B	AN34B_MOUSE	-1.10053	0.000548491	0.00292409	1.49058e-05
Q8BIF2	Rbfox3	RNA binding protein fox-1 homolog 3	RFOX3_MOUSE	1.29263	0.000549009	0.00292411	3.94734e-06
Q8CHG7	Rapgef2	Rap guanine nucleotide exchange factor 2	RPGF2_MOUSE	0.754743	0.000551025	0.00293211	5.09012e-05
Q91WK5	Gcsh	Glycine cleavage system H protein, mitochondrial	GCSH_MOUSE	-0.457656	0.000551797	0.00293348	0.000154194
Q9CQY6	Uqcc2	Ubiquinol-cytochrome-c reductase complex assembly factor 2	UQCC2_MOUSE	-0.444935	0.000552373	0.0029338	8.06658e-05
Q04888	Sox10	Transcription factor SOX-10	SOX10_MOUSE	-1.35168	0.000555385	0.00294652	2.31765e-06
Q91YD9	Wasl	Neural Wiskott-Aldrich syndrome protein	WASL_MOUSE	0.513028	0.000555801	0.00294652	9.08447e-05
Q99KR3	Lactb2	Endoribonuclease LACTB2	LACB2_MOUSE	-0.398073	0.000556713	0.00294861	1.2456e-05
Q9JI59	Jam2	Junctional adhesion molecule B	JAM2_MOUSE	-0.766193	0.000561936	0.00297351	1.20147e-05
Q6P5B0	Rrp12	RRP12-like protein	RRP12_MOUSE	1.0447	0.00056362	0.00297966	3.4523e-06
Q3UQ84	Tars2	Threonine--tRNA ligase, mitochondrial	SYTM_MOUSE	0.29706	0.000565044	0.00298228	3.50752e-05
Q8BNE1	Tcaf1	TRPM8 channel-associated factor 1	TCAF1_MOUSE	0.567203	0.00056558	0.00298228	3.45021e-06
Q8VHX6	Flnc	Filamin-C	FLNC_MOUSE	-1.76465	0.000566189	0.00298228	4.39898e-05
Q3THF9	Coq10b	Coenzyme Q-binding protein COQ10 homolog B, mitochondrial	CQ10B_MOUSE	0.878547	0.00056714	0.00298228	4.5578e-06
Q8CBC4	Cnst	Consortin	CNST_MOUSE	0.990171	0.000567198	0.00298228	1.61887e-05
Q9CRD2	Emc2	ER membrane protein complex subunit 2	EMC2_MOUSE	-0.188292	0.000567256	0.00298228	3.30467e-05
Q9JMK2	Csnk1e	Casein kinase I isoform epsilon	KC1E_MOUSE	0.760524	0.000569428	0.00298662	2.37605e-05
Q91W92	Cdc42ep1	Cdc42 effector protein 1	BORG5_MOUSE	-1.45156	0.000570394	0.00298662	2.89394e-05
Q91V09	Wdr13	WD repeat-containing protein 13	WDR13_MOUSE	0.668664	0.000570447	0.00298662	6.21637e-05
Q8JZR6	Slc4a8	Electroneutral sodium bicarbonate exchanger 1	S4A8_MOUSE	-0.988435	0.000570598	0.00298662	1.5032e-05
P28660	Nckap1	Nck-associated protein 1	NCKP1_MOUSE	0.634149	0.000570702	0.00298662	0.000188609
Q99NF2	Nsmf	NMDA receptor synaptonuclear signaling and neuronal migration factor	NSMF_MOUSE	0.80792	0.000573802	0.00300009	1.88297e-05
P60761	Nrgn	Neurogranin	NEUG_MOUSE	1.24675	0.000576014	0.00300889	0.0014429
Q9QYS2	Grm3	Metabotropic glutamate receptor 3	GRM3_MOUSE	1.12659	0.000577717	0.00301307	0.000130759
Q3UZP4	Svip	Small VCP/p97-interacting protein	SVIP_MOUSE	-0.671968	0.000577872	0.00301307	0.000135557
Q9ESW4	Agk	Acylglycerol kinase, mitochondrial	AGK_MOUSE	0.389508	0.000579054	0.00301484	0.000240073
O70400	Pdlim1	PDZ and LIM domain protein 1	PDLI1_MOUSE	-1.49062	0.000579267	0.00301484	1.53844e-05
Q8BH18	Tmem117	Transmembrane protein 117	TM117_MOUSE	-1.48775	0.000582329	0.003028	2.07591e-06
P11438	Lamp1	Lysosome-associated membrane glycoprotein 1	LAMP1_MOUSE	-0.535379	0.000582921	0.00302832	3.77395e-05
Q60790	Rasa3	Ras GTPase-activating protein 3	RASA3_MOUSE	-0.696532	0.000583572	0.00302894	3.10989e-05
P84096	Rhog	Rho-related GTP-binding protein RhoG	RHOG_MOUSE	-0.95624	0.000584493	0.00303032	0.000587296
Q8BIK4	Dock9	Dedicator of cytokinesis protein 9	DOCK9_MOUSE	-0.376622	0.000584901	0.00303032	2.65429e-05
P50096	Impdh1	Inosine-5'-monophosphate dehydrogenase 1	IMDH1_MOUSE	1.80748	0.000587603	0.00304046	7.72257e-06
Q6WQJ1	Dagla	Sn1-specific diacylglycerol lipase alpha	DGLA_MOUSE	1.13491	0.000587925	0.00304046	1.72265e-05
O35459	Ech1	Delta(3,5)-Delta(2,4)-dienoyl-CoA isomerase, mitochondrial	ECH1_MOUSE	-0.437841	0.00059048	0.0030509	6.28531e-05
P84104	Srsf3	Serine/arginine-rich splicing factor 3	SRSF3_MOUSE	0.70409	0.000601542	0.00310212	0.000309157
Q8JZK9	Hmgcs1	Hydroxymethylglutaryl-CoA synthase, cytoplasmic	HMCS1_MOUSE	-0.955866	0.000601844	0.00310212	4.58116e-05
Q9EPC1	Parva	Alpha-parvin	PARVA_MOUSE	-0.561119	0.000602026	0.00310212	1.44036e-05
Q3TC93	Hs1bp3	HCLS1-binding protein 3	H1BP3_MOUSE	-0.323885	0.000603364	0.00310452	7.67527e-06
Q8BQP9	Rgs7bp	Regulator of G-protein signaling 7-binding protein	R7BP_MOUSE	1.53436	0.000604023	0.00310452	6.00842e-05
Q5NCE8	Mrs2	Magnesium transporter MRS2 homolog, mitochondrial	MRS2_MOUSE	-0.587195	0.000604779	0.00310452	1.41904e-05
Q09163	Dlk1	Protein delta homolog 1	DLK1_MOUSE	-1.32403	0.00060483	0.00310452	9.75234e-06
Q80Z38	Shank2	SH3 and multiple ankyrin repeat domains protein 2	SHAN2_MOUSE	1.44253	0.000605216	0.00310452	2.90565e-05
Q8C078	Camkk2	Calcium/calmodulin-dependent protein kinase kinase 2	KKCC2_MOUSE	1.20483	0.000609051	0.00312139	5.17827e-05
Q68FD5	Cltc	Clathrin heavy chain 1	CLH1_MOUSE	0.488559	0.00061091	0.00312583	0.00184413
Q9DCW4	Etfb	Electron transfer flavoprotein subunit beta	ETFB_MOUSE	-0.438636	0.000611464	0.00312583	0.000421102
Q0KK55	Kndc1	Kinase non-catalytic C-lobe domain-containing protein 1	KNDC1_MOUSE	-1.50892	0.000611626	0.00312583	4.86582e-06
Q99JT9	Adi1	1,2-dihydroxy-3-keto-5-methylthiopentene dioxygenase	MTND_MOUSE	-1.07429	0.000612112	0.00312583	4.21172e-06
Q64444	Ca4	Carbonic anhydrase 4	CAH4_MOUSE	0.602688	0.000614457	0.003135	1.81678e-05
Q8JZM4	Dner	Delta and Notch-like epidermal growth factor-related receptor	DNER_MOUSE	-1.00595	0.000615943	0.00313766	3.73708e-06
O35474	Edil3	EGF-like repeat and discoidin I-like domain-containing protein 3	EDIL3_MOUSE	-0.994668	0.000616079	0.00313766	9.25802e-06
Q9JJK2	Lancl2	LanC-like protein 2	LANC2_MOUSE	0.538689	0.000619504	0.00315228	0.000159141
Q8R3F5	Mcat	Malonyl-CoA-acyl carrier protein transacylase, mitochondrial	FABD_MOUSE	0.364838	0.000621548	0.00315986	2.11123e-05
Q3UNZ8	Cryzl2	Quinone oxidoreductase-like protein 2	QORL2_MOUSE	-1.60445	0.00062252	0.00316198	3.57272e-05
P47879	Igfbp4	Insulin-like growth factor-binding protein 4	IBP4_MOUSE	2.31416	0.000623958	0.00316646	1.6112e-06
Q8VCR7	Abhd14b	Protein ABHD14B	ABHEB_MOUSE	-0.383711	0.000624749	0.00316673	4.59086e-05
O70589	Cask	Peripheral plasma membrane protein CASK	CSKP_MOUSE	0.236452	0.000625121	0.00316673	0.000109059
Q9CQM9	Glrx3	Glutaredoxin-3	GLRX3_MOUSE	-0.51715	0.000628299	0.00318	0.000174294
P85094	Isoc2a	Isochorismatase domain-containing protein 2A	ISC2A_MOUSE	-0.626679	0.000628994	0.00318069	9.50108e-05
Q8BTG7	Ndrg4	Protein NDRG4	NDRG4_MOUSE	-0.319765	0.000631599	0.00319103	0.000161999
Q925I1	Atad3	ATPase family AAA domain-containing protein 3	ATAD3_MOUSE	0.281627	0.000633248	0.00319653	0.000124286
Q9R233	Tapbp	Tapasin	TPSN_MOUSE	-1.47722	0.000634789	0.00320147	1.60988e-06
Q64669,P05982	Nqo1	NAD(P)H dehydrogenase [quinone] 1	NQO1_MOUSE,NQO1_RAT	-0.724153	0.000637919	0.00321298	2.17005e-05
A2AJA9	Ajm1	Apical junction component 1 homolog	AJM1_MOUSE	1.34027	0.000638386	0.00321298	2.72522e-05
Q9D8Y0,Q4FZY0	Efhd2	EF-hand domain-containing protein D2	EFHD2_MOUSE,EFHD2_RAT	0.336588	0.000638763	0.00321298	0.000462147
Q8BHN0	Ppm1l	Protein phosphatase 1L	PPM1L_MOUSE	-1.43763	0.00063998	0.00321553	4.70451e-06
Q02357	Ank1	Ankyrin-1	ANK1_MOUSE	-1.6909	0.000640398	0.00321553	4.71642e-05
Q61206	Pafah1b2	Platelet-activating factor acetylhydrolase IB subunit beta	PA1B2_MOUSE	-0.32136	0.000641281	0.00321713	0.000422234
P54822	Adsl	Adenylosuccinate lyase	PUR8_MOUSE	-0.335901	0.000642991	0.00322287	5.30925e-05
Q920P3	Brinp1	BMP/retinoic acid-inducible neural-specific protein 1	BRNP1_MOUSE	0.724292	0.000647988	0.00324275	2.15205e-05
P35821	Ptpn1	Tyrosine-protein phosphatase non-receptor type 1	PTN1_MOUSE	0.340905	0.000648096	0.00324275	1.06143e-05
P60755	Mdga2	MAM domain-containing glycosylphosphatidylinositol anchor protein 2	MDGA2_MOUSE	0.406742	0.00065003	0.0032492	1.16317e-05
O54983	Crym	Ketimine reductase mu-crystallin	CRYM_MOUSE	1.39996	0.000650523	0.0032492	0.000454857
Q99N87	Mrps5	28S ribosomal protein S5, mitochondrial	RT05_MOUSE	0.540868	0.000651772	0.00325258	1.70399e-05
O88935	Syn1	Synapsin-1	SYN1_MOUSE	0.525972	0.000652525	0.00325349	0.00315046
P60710;P60712,P60709	Actb;ACTB,ACTB	Actin, cytoplasmic 1;Actin, cytoplasmic 1,Actin, cytoplasmic 1	ACTB_MOUSE;ACTB_BOVIN,ACTB_HUMAN	0.443841	0.000655158	0.00326376	0.0162913
Q8K3W0,Q6SP92	Babam2	BRISC and BRCA1-A complex member 2	BABA2_MOUSE,BABA2_MESAU	0.302649	0.000656853	0.00326935	3.13944e-05
O54724	Cavin1	Caveolae-associated protein 1	CAVN1_MOUSE	-1.03273	0.000657462	0.00326953	8.0604e-05
P12265	Gusb	Beta-glucuronidase	BGLR_MOUSE	-0.382514	0.000659557	0.00327709	3.93989e-06
P58059	Mrps21	28S ribosomal protein S21, mitochondrial	RT21_MOUSE	0.541537	0.000661057	0.00328168	4.38969e-06
Q8BHK1	Nipa1	Magnesium transporter NIPA1	NIPA1_MOUSE	-0.451966	0.0006625	0.00328598	2.91799e-05
Q9D1B9	Mrpl28	39S ribosomal protein L28, mitochondrial	RM28_MOUSE	0.339736	0.000664311	0.00329209	1.86517e-05
Q9ESN4	C1ql3	Complement C1q-like protein 3	C1QL3_MOUSE	2.4193	0.000665306	0.00329416	1.96771e-05
Q6PD24	Ankrd13d	Ankyrin repeat domain-containing protein 13D	AN13D_MOUSE	-0.580483	0.000666267	0.00329606	1.59709e-05
P47941	Crkl	Crk-like protein	CRKL_MOUSE	-0.345733	0.000668987	0.00330664	7.00906e-05
Q8VEL9	Rem2	GTP-binding protein REM 2	REM2_MOUSE	0.91899	0.000670877	0.00331145	5.99899e-05
P15508	Sptb	Spectrin beta chain, erythrocytic	SPTB1_MOUSE	1.06036	0.000671122	0.00331145	6.05637e-05
Q9R1E0	Foxo1	Forkhead box protein O1	FOXO1_MOUSE	2.12198	0.00067341	0.00331987	2.64152e-06
Q6GQS1	Slc25a23	Calcium-binding mitochondrial carrier protein SCaMC-3	SCMC3_MOUSE	0.816007	0.000674906	0.00332437	5.54287e-05
Q61161	Map4k2	Mitogen-activated protein kinase kinase kinase kinase 2	M4K2_MOUSE	-0.562265	0.000676233	0.00332802	5.16397e-06
Q920I9	Wdr7	WD repeat-containing protein 7	WDR7_MOUSE	0.352906	0.000677331	0.00333055	0.000187698
Q8VE97	Srsf4	Serine/arginine-rich splicing factor 4	SRSF4_MOUSE	0.433406	0.00067839	0.00333288	0.000101751
Q9WVT6	Ca14	Carbonic anhydrase 14	CAH14_MOUSE	-1.70542	0.000679579	0.00333585	7.05559e-05
O35382	Exoc4	Exocyst complex component 4	EXOC4_MOUSE	0.510137	0.000680179	0.00333592	5.96624e-05
O35286	Dhx15	Pre-mRNA-splicing factor ATP-dependent RNA helicase DHX15	DHX15_MOUSE	0.584419	0.000685666	0.00335994	4.81681e-05
Q8QZT2	Ccsap	Centriole, cilia and spindle-associated protein	CCSAP_MOUSE	3.2471	0.000686592	0.00336159	6.46567e-05
E9Q735	Ube4a	Ubiquitin conjugation factor E4 A	UBE4A_MOUSE	-0.534064	0.000689807	0.00337443	2.02788e-05
Q9D666	Sun1	SUN domain-containing protein 1	SUN1_MOUSE	1.16361	0.000691504	0.00337912	1.282e-06
Q8R1F1	Niban2	Protein Niban 2	NIBA2_MOUSE	-0.360505	0.000691952	0.00337912	1.33171e-05
Q8R0A5	Tceal3	Transcription elongation factor A protein-like 3	TCAL3_MOUSE	0.936666	0.000696087	0.0033964	5.40591e-05
Q91ZZ3	Sncb	Beta-synuclein	SYUB_MOUSE	0.460481	0.000696767	0.00339681	0.00291174
Q3TKT4	Smarca4	Transcription activator BRG1	SMCA4_MOUSE	0.867901	0.000698083	0.00339778	7.83571e-06
Q9CYK1	Wars2	Tryptophan--tRNA ligase, mitochondrial	SYWM_MOUSE	0.493803	0.000698157	0.00339778	1.10436e-05
P68037	Ube2l3	Ubiquitin-conjugating enzyme E2 L3	UB2L3_MOUSE	-0.303113	0.000699101	0.00339947	0.000234312
Q8BVZ5	Il33	Interleukin-33	IL33_MOUSE	-1.2588	0.000702441	0.0034128	6.45893e-06
Q8R2U6	Nudt4	Diphosphoinositol polyphosphate phosphohydrolase 2	NUDT4_MOUSE	-0.96451	0.000703349	0.0034143	6.45656e-06
Q9WU40	Lemd3	Inner nuclear membrane protein Man1	MAN1_MOUSE	0.369031	0.000704333	0.00341617	5.92741e-06
Q63943	Mef2d	Myocyte-specific enhancer factor 2D	MEF2D_MOUSE	2.0872	0.000705125	0.0034171	6.24447e-06
A2APV2	Fmnl2	Formin-like protein 2	FMNL2_MOUSE	-0.60522	0.000705965	0.00341779	3.30242e-05
P62855	Rps26	40S ribosomal protein S26	RS26_MOUSE	0.783861	0.000707156	0.00341779	0.000128973
Q8R1X6	Spart	Spartin	SPART_MOUSE	-0.765321	0.000707957	0.00341779	2.74253e-05
Q9Z0R9	Fads2	Acyl-CoA 6-desaturase	FADS2_MOUSE	-0.707997	0.000708575	0.00341779	1.01114e-05
Q7TT50	Cdc42bpb	Serine/threonine-protein kinase MRCK beta	MRCKB_MOUSE	0.319079	0.000710188	0.00341779	4.37228e-05
Q91WT9	Cbs	Cystathionine beta-synthase	CBS_MOUSE	-0.378441	0.00071045	0.00341779	2.10316e-05
Q9WVD5	Slc25a15	Mitochondrial ornithine transporter 1	ORNT1_MOUSE	-0.46779	0.000710529	0.00341779	9.86209e-06
Q9WV02	Rbmx	RNA-binding motif protein, X chromosome	RBMX_MOUSE	1.09542	0.000710579	0.00341779	3.66235e-05
Q9JLJ0	Litaf	Lipopolysaccharide-induced tumor necrosis factor-alpha factor homolog	LITAF_MOUSE	-1.23753	0.000710666	0.00341779	4.71184e-05
P63216	Gng3	Guanine nucleotide-binding protein G(I)/G(S)/G(O) subunit gamma-3	GBG3_MOUSE	0.54408	0.000712971	0.00342563	0.000400227
P22005	Penk	Proenkephalin-A	PENK_MOUSE	0.872687	0.000713938	0.00342563	0.000104016
Q5F285	Tmem256	Transmembrane protein 256	TM256_MOUSE	0.371194	0.000714365	0.00342563	9.73191e-05
Q6PB90	Pcdhb14	Protocadherin beta-14	PCDBE_MOUSE	0.565796	0.000715236	0.00342563	8.16283e-06
Q3UHK6	Tenm4	Teneurin-4	TEN4_MOUSE	0.8432	0.000715301	0.00342563	1.7298e-05
Q9CR98	Fam136a	Protein FAM136A	F136A_MOUSE	0.697066	0.000716063	0.0034264	0.00010446
Q8R4F1	Ntng2	Netrin-G2	NTNG2_MOUSE	0.484155	0.000717448	0.00343015	1.03991e-05
Q9QYI3	Dnajc7	DnaJ homolog subfamily C member 7	DNJC7_MOUSE	0.625921	0.000721706	0.00344476	2.57676e-05
Q9CZ42	Naxd	ATP-dependent (S)-NAD(P)H-hydrate dehydratase	NNRD_MOUSE	0.279727	0.000721713	0.00344476	0.000165652
Q99JB8	Pacsin3	Protein kinase C and casein kinase II substrate protein 3	PACN3_MOUSE	-0.504823	0.000722702	0.00344659	2.36526e-05
Q8BLC3	Lypd1	Ly6/PLAUR domain-containing protein 1	LYPD1_MOUSE	0.624121	0.00072563	0.00345766	1.38585e-05
Q62351	Tfrc	Transferrin receptor protein 1	TFR1_MOUSE	-0.67161	0.000726789	0.00346029	2.68962e-05
P0DP60	Lynx1	Ly-6/neurotoxin-like protein 1	LYNX1_MOUSE	-0.805058	0.000727498	0.00346078	0.000279332
O54990	Prom1	Prominin-1	PROM1_MOUSE	-0.837996	0.00073076	0.00347238	6.60181e-06
Q811D0	Dlg1	Disks large homolog 1	DLG1_MOUSE	0.686849	0.000731156	0.00347238	0.000228664
O35326,Q09167;Q13243	Srsf5,Srsf5;SRSF5	Serine/arginine-rich splicing factor 5	SRSF5_MOUSE,SRSF5_RAT;SRSF5_HUMAN	0.46346	0.00073525	0.00348892	3.04426e-05
Q8BGD5	Cpt1c	Carnitine O-palmitoyltransferase 1, brain isoform	CPT1C_MOUSE	0.491442	0.000735952	0.00348934	2.50675e-05
Q6PFD9	Nup98	Nuclear pore complex protein Nup98-Nup96	NUP98_MOUSE	0.776671	0.000739259	0.00350211	7.3327e-06
Q8JZS0	Lin7a	Protein lin-7 homolog A	LIN7A_MOUSE	0.316207	0.000743048	0.00351714	0.000226807
Q8CD19	Lancl3	LanC-like protein 3	LANC3_MOUSE	-1.26795	0.000745415	0.00352541	2.86897e-06
Q91W53	Golga7	Golgin subfamily A member 7	GOGA7_MOUSE	-1.19986	0.000747225	0.00353104	2.04481e-05
P05533	Ly6a	Lymphocyte antigen 6A-2/6E-1	LY6A_MOUSE	-0.677174	0.000748274	0.00353142	7.46541e-06
Q9Z2A5	Ate1	Arginyl-tRNA--protein transferase 1	ATE1_MOUSE	-0.308703	0.000748544	0.00353142	9.74868e-06
O35250	Exoc7	Exocyst complex component 7	EXOC7_MOUSE	0.542843	0.000749812	0.00353447	3.16603e-05
Q99MU3	Adar	Double-stranded RNA-specific adenosine deaminase	DSRAD_MOUSE	-0.724008	0.000750835	0.00353637	4.1289e-06
Q99ML4	Dipk1b	Divergent protein kinase domain 1B	DIK1B_MOUSE	-1.00049	0.000751908	0.00353849	2.29131e-06
P55012	Slc12a2	Solute carrier family 12 member 2	S12A2_MOUSE	-1.46518	0.000753028	0.00353849	0.00015128
P68372	Tubb4b	Tubulin beta-4B chain	TBB4B_MOUSE	-0.169537	0.000753149	0.00353849	0.0159041
P47759	Nsg2	Neuronal vesicle trafficking-associated protein 2	NSG2_MOUSE	1.28816	0.00076075	0.00357126	6.9879e-06
Q6PGH2	Jpt2	Jupiter microtubule associated homolog 2	JUPI2_MOUSE	-0.898979	0.000764006	0.0035836	1.10717e-05
Q05920	Pc	Pyruvate carboxylase, mitochondrial	PYC_MOUSE	-0.236582	0.000764933	0.00358499	0.000495168
Q62059	Vcan	Versican core protein	CSPG2_MOUSE	-0.4723	0.000765942	0.00358677	0.000425738
Q9D1E8	Agpat5	1-acyl-sn-glycerol-3-phosphate acyltransferase epsilon	PLCE_MOUSE	-0.603967	0.000768493	0.00359356	8.93128e-06
Q9EPQ7	Stard5	StAR-related lipid transfer protein 5	STAR5_MOUSE	-0.410393	0.000769019	0.00359356	4.29291e-06
Q3V3Q7	Pacs2	Phosphofurin acidic cluster sorting protein 2	PACS2_MOUSE	-0.630809	0.000769569	0.00359356	3.30559e-05
Q8BZW8	Nhlrc2	NHL repeat-containing protein 2	NHLC2_MOUSE	-0.438392	0.000769914	0.00359356	1.67562e-05
P55937	Golga3	Golgin subfamily A member 3	GOGA3_MOUSE	-0.520341	0.000775706	0.00361763	1.21271e-05
Q8BTG3	Tcp11l1	T-complex protein 11-like protein 1	T11L1_MOUSE	-0.810573	0.000779296	0.00362826	2.05529e-05
Q9Z1X4	Ilf3	Interleukin enhancer-binding factor 3	ILF3_MOUSE	0.546579	0.000779585	0.00362826	6.6301e-05
Q8VEB4	Pla2g15	Group XV phospholipase A2	PAG15_MOUSE	0.38939	0.000779894	0.00362826	8.43078e-06
Q9ET77	Jph3	Junctophilin-3	JPH3_MOUSE	2.49919	0.000781523	0.00363287	3.87085e-06
Q61704	Itih3	Inter-alpha-trypsin inhibitor heavy chain H3	ITIH3_MOUSE	-1.58338	0.000785239	0.00364717	2.43523e-05
O35074	Ptgis	Prostacyclin synthase	PTGIS_MOUSE	-3.47769	0.0007875	0.00365469	3.96024e-06
O88444	Adcy1	Adenylate cyclase type 1	ADCY1_MOUSE	1.25675	0.000791907	0.00367215	1.06913e-05
P31649	Slc6a13	Sodium- and chloride-dependent GABA transporter 2	S6A13_MOUSE	-3.66313	0.000795322	0.00368499	7.73459e-06
Q8BTI9	Pik3cb	Phosphatidylinositol 4,5-bisphosphate 3-kinase catalytic subunit beta isoform	PK3CB_MOUSE	-0.177203	0.000800512	0.00370364	6.73655e-06
Q91V01	Lpcat3	Lysophospholipid acyltransferase 5	MBOA5_MOUSE	-0.384106	0.000800647	0.00370364	5.07907e-06
Q8K0S0	Phyhip	Phytanoyl-CoA hydroxylase-interacting protein	PHYIP_MOUSE	1.24731	0.00080135	0.00370389	0.000366408
P35762	Cd81	CD81 antigen	CD81_MOUSE	-0.800827	0.000802734	0.00370728	0.000609105
Q924L1	Letmd1	LETM1 domain-containing protein 1	LTMD1_MOUSE	0.957085	0.000803606	0.0037083	2.33219e-05
P12815	Pdcd6	Programmed cell death protein 6	PDCD6_MOUSE	0.185545	0.000805824	0.00371553	0.000194978
P62754	Rps6	40S ribosomal protein S6	RS6_MOUSE	0.454096	0.000806947	0.0037177	0.000244029
P11276	Fn1	Fibronectin	FINC_MOUSE	-2.26891	0.000808778	0.00372292	1.37012e-06
P0CW02	Ly6c1	Lymphocyte antigen 6C1	LY6C1_MOUSE	-0.488053	0.000809386	0.00372292	3.45709e-05
Q8JZP2	Syn3	Synapsin-3	SYN3_MOUSE	-0.691618	0.000810482	0.00372324	9.79955e-05
B7ZMP1	Xpnpep3	Xaa-Pro aminopeptidase 3	XPP3_MOUSE	0.838756	0.000810982	0.00372324	1.32838e-05
P20352	F3	Tissue factor	TF_MOUSE	-0.406283	0.000811417	0.00372324	4.22605e-05
Q6ZWU9	Rps27	40S ribosomal protein S27	RS27_MOUSE	0.35569	0.000812822	0.00372669	8.49673e-05
Q8BR63	Fam177a1	Protein FAM177A1	F177A_MOUSE	-0.779697	0.000815671	0.00373674	8.62879e-05
Q6NV83	U2surp	U2 snRNP-associated SURP motif-containing protein	SR140_MOUSE	0.595243	0.000820455	0.00375564	8.70611e-06
Q9JKF6	Nectin1	Nectin-1	NECT1_MOUSE	0.595114	0.000821931	0.00375938	4.44864e-05
Q61001	Lama5	Laminin subunit alpha-5	LAMA5_MOUSE	-1.61362	0.000824051	0.00376605	2.34105e-05
Q922D8	Mthfd1	C-1-tetrahydrofolate synthase, cytoplasmic	C1TC_MOUSE	-0.338685	0.000827413	0.00377839	0.000131641
P31001	Des	Desmin	DESM_MOUSE	-1.61704	0.00082906	0.00378287	2.63036e-05
Q9CQX5	Cldnd1	Claudin domain-containing protein 1	CLDN1_MOUSE	-0.43629	0.000831262	0.00378989	2.61332e-05
Q3TBL6	Tnfaip8l3	Tumor necrosis factor alpha-induced protein 8-like protein 3	TP8L3_MOUSE	1.99495	0.000834931	0.0038007	7.80392e-06
Q925N1	Sfxn4	Sideroflexin-4	SFXN4_MOUSE	0.747258	0.000834968	0.0038007	4.66697e-06
Q61207	Psap	Prosaposin	SAP_MOUSE	-0.265467	0.000838896	0.00381554	0.00121661
Q924A2	Cic	Protein capicua homolog	CIC_MOUSE	2.65387	0.00084171	0.00382528	7.21177e-07
Q61387	Cox7a2l	Cytochrome c oxidase subunit 7A-related protein, mitochondrial	COX7R_MOUSE	-0.274283	0.000844015	0.0038327	2.50468e-05
Q6NS60	Fbxo41	F-box only protein 41	FBX41_MOUSE	1.02085	0.00084587	0.00383775	2.29553e-05
Q8BH64	Ehd2	EH domain-containing protein 2	EHD2_MOUSE	-1.60195	0.000846473	0.00383775	8.95384e-06
P57774	Npy	Pro-neuropeptide Y	NPY_MOUSE	3.31723	0.000856146	0.00387852	2.67435e-05
Q8K1M6	Dnm1l	Dynamin-1-like protein	DNM1L_MOUSE	0.183213	0.0008592	0.00388926	0.000430426
Q7TMC8	Fcsk	L-fucose kinase	FCSK_MOUSE	0.400801	0.000861192	0.00389519	1.63541e-05
Q8BYN5	Fsd1l	FSD1-like protein	FSD1L_MOUSE	-0.248971	0.000862644	0.00389866	2.72505e-05
P84089	Erh	Enhancer of rudimentary homolog	ERH_MOUSE	0.602129	0.000863437	0.00389915	0.000140762
P61215	Ca10	Carbonic anhydrase-related protein 10	CAH10_MOUSE	1.06382	0.000864691	0.00390104	3.45025e-06
Q9WTQ5	Akap12	A-kinase anchor protein 12	AKA12_MOUSE	-1.21814	0.000865225	0.00390104	6.51178e-05
Q64689	St8sia3	Sia-alpha-2,3-Gal-beta-1,4-GlcNAc-R:alpha 2,8-sialyltransferase	SIA8C_MOUSE	0.982441	0.000867016	0.00390603	3.6085e-06
Q9CX60	Lbh	Protein LBH	LBH_MOUSE	-1.42552	0.000867705	0.00390604	2.97248e-05
Q9JM76	Arpc3	Actin-related protein 2/3 complex subunit 3	ARPC3_MOUSE	0.774986	0.000871553	0.00392027	0.000366853
Q9Z2D8	Mbd3	Methyl-CpG-binding domain protein 3	MBD3_MOUSE	0.894835	0.000878132	0.00394675	2.5419e-06
Q60649	Clpb	Caseinolytic peptidase B protein homolog	CLPB_MOUSE	0.353078	0.000884307	0.00397137	3.46228e-05
Q8CC21	Ttc19	Tetratricopeptide repeat protein 19, mitochondrial	TTC19_MOUSE	0.453354	0.00088918	0.00399011	1.96182e-05
O70209	Pdlim3	PDZ and LIM domain protein 3	PDLI3_MOUSE	-2.5761	0.000890329	0.00399184	6.37623e-06
P39061	Col18a1	Collagen alpha-1(XVIII) chain	COIA1_MOUSE	-1.83855	0.000890968	0.00399184	1.36519e-05
Q7TPV4	Mybbp1a	Myb-binding protein 1A	MBB1A_MOUSE	0.445968	0.000892581	0.00399593	1.67491e-05
P49070	Camlg	Calcium signal-modulating cyclophilin ligand	CAMLG_MOUSE	0.258264	0.0008936	0.00399631	1.24693e-05
Q3TD49	Sppl2b	Signal peptide peptidase-like 2B	SPP2B_MOUSE	-0.282645	0.000894068	0.00399631	2.643e-06
Q3UHD1	Adgrb1	Adhesion G protein-coupled receptor B1	AGRB1_MOUSE	0.826451	0.000898339	0.00401225	2.23124e-05
Q8BX17	Gemin5	Gem-associated protein 5	GEMI5_MOUSE	0.592441	0.000900361	0.00401813	2.91059e-06
Q9DBT5	Ampd2	AMP deaminase 2	AMPD2_MOUSE	-0.330679	0.000904023	0.00403132	0.000119896
A2AG50	Map7d2	MAP7 domain-containing protein 2	MA7D2_MOUSE	-1.17156	0.000906371	0.00403863	8.05513e-05
Q8BRF7	Scfd1	Sec1 family domain-containing protein 1	SCFD1_MOUSE	-0.269681	0.000907119	0.00403881	3.46441e-05
Q9QUG9	Rasgrp2	RAS guanyl-releasing protein 2	GRP2_MOUSE	0.872683	0.00091	0.00404847	0.000116753
Q62361	Trh	Pro-thyrotropin-releasing hormone	TRH_MOUSE	2.33728	0.000911093	0.00405017	1.82644e-05
Q9D5T0	Atad1	ATPase family AAA domain-containing protein 1	ATAD1_MOUSE	-0.252921	0.000916093	0.00406922	0.000124172
Q6EDY6	Carmil1	F-actin-uncapping protein LRRC16A	CARL1_MOUSE	-0.720651	0.000920852	0.00408473	6.62201e-06
Q9D1L0	Chchd2	Coiled-coil-helix-coiled-coil-helix domain-containing protein 2	CHCH2_MOUSE	0.287099	0.000921017	0.00408473	6.26319e-05
P25444	Rps2	40S ribosomal protein S2	RS2_MOUSE	0.238871	0.000924816	0.00409839	0.000165226
P63330	Ppp2ca	Serine/threonine-protein phosphatase 2A catalytic subunit alpha isoform	PP2AA_MOUSE	0.436367	0.000926314	0.00410184	0.000937189
Q3UGR5	Hdhd2	Haloacid dehalogenase-like hydrolase domain-containing protein 2	HDHD2_MOUSE	-0.504589	0.000927827	0.00410535	0.000148838
P21447	Abcb1a	ATP-dependent translocase ABCB1	MDR1A_MOUSE	-0.257903	0.000931779	0.00411955	4.07065e-05
Q6ZQ29	Taok2	Serine/threonine-protein kinase TAO2	TAOK2_MOUSE	0.372588	0.000932483	0.00411955	1.71611e-05
Q65CL1	Ctnna3	Catenin alpha-3	CTNA3_MOUSE	-2.33158	0.000938253	0.00414183	4.36054e-06
Q5SYD0	Myo1d	Unconventional myosin-Id	MYO1D_MOUSE	-1.04079	0.000939527	0.00414425	0.000123828
P06797	Ctsl	Cathepsin L1	CATL1_MOUSE	-0.44918	0.000942221	0.00415291	3.54839e-05
P63254	Crip1	Cysteine-rich protein 1	CRIP1_MOUSE	-1.38486	0.000945017	0.00416202	0.000110836
Q8BHD7	Ptbp3	Polypyrimidine tract-binding protein 3	PTBP3_MOUSE	0.483814	0.000951401	0.00418187	1.15617e-05
P56376	Acyp1	Acylphosphatase-1	ACYP1_MOUSE	-0.367998	0.000951624	0.00418187	0.000181085
Q6P1F6	Ppp2r2a	Serine/threonine-protein phosphatase 2A 55 kDa regulatory subunit B alpha isoform	2ABA_MOUSE	0.503096	0.000952438	0.00418187	0.000346335
Q6WKZ8	Ubr2	E3 ubiquitin-protein ligase UBR2	UBR2_MOUSE	-0.511023	0.00095246	0.00418187	3.50363e-06
Q99N94	Mrpl9	39S ribosomal protein L9, mitochondrial	RM09_MOUSE	0.729259	0.000955451	0.00419177	3.44378e-05
Q80UG2	Plxna4	Plexin-A4	PLXA4_MOUSE	0.56719	0.000956807	0.00419449	0.000103335
Q9D2P4	Urm1	Ubiquitin-related modifier 1	URM1_MOUSE	-0.416775	0.000960278	0.00420176	2.19597e-05
Q80W54	Zmpste24	CAAX prenyl protease 1 homolog	FACE1_MOUSE	-0.295925	0.000960374	0.00420176	2.61681e-05
Q8VEE0	Rpe	Ribulose-phosphate 3-epimerase	RPE_MOUSE	-0.75137	0.000960677	0.00420176	4.05773e-06
Q689Z5	Sbno1	Protein strawberry notch homolog 1	SBNO1_MOUSE	1.11874	0.000961995	0.0042028	1.25478e-06
Q80TA6	Mtmr12	Myotubularin-related protein 12	MTMRC_MOUSE	1.303	0.000962389	0.0042028	4.44061e-06
Q8BXC6	Commd2	COMM domain-containing protein 2	COMD2_MOUSE	-0.809836	0.000965152	0.00420973	3.85215e-05
Q9QUP5	Hapln1	Hyaluronan and proteoglycan link protein 1	HPLN1_MOUSE	0.453768	0.000965454	0.00420973	0.000353876
Q8VEK3	Hnrnpu	Heterogeneous nuclear ribonucleoprotein U	HNRPU_MOUSE	0.77091	0.000969994	0.0042263	0.000314567
Q9R0D8	Wdr54	WD repeat-containing protein 54	WDR54_MOUSE	0.250012	0.000972531	0.00423411	6.0804e-05
Q8BH47	Sec22a	Vesicle-trafficking protein SEC22a	SC22A_MOUSE	0.491172	0.000974315	0.0042366	6.16167e-06
Q8BVY0	Rsl1d1	Ribosomal L1 domain-containing protein 1	RL1D1_MOUSE	0.62566	0.000974588	0.0042366	7.25237e-06
P21981	Tgm2	Protein-glutamine gamma-glutamyltransferase 2	TGM2_MOUSE	-1.69725	0.000977254	0.00424297	4.94256e-05
Q9JJ43	Rbfox1	RNA binding protein fox-1 homolog 1	RFOX1_MOUSE	1.02248	0.000977543	0.00424297	1.92824e-05
Q9D924	Isca1	Iron-sulfur cluster assembly 1 homolog, mitochondrial	ISCA1_MOUSE	0.278986	0.000978697	0.00424475	3.79487e-05
Q60668	Hnrnpd	Heterogeneous nuclear ribonucleoprotein D0	HNRPD_MOUSE	0.667939	0.000981774	0.00425485	0.000443267
Q60936	Coq8a	Atypical kinase COQ8A, mitochondrial	COQ8A_MOUSE	0.776055	0.000988514	0.00428081	2.05639e-05
Q8JZS9	Mrpl48	39S ribosomal protein L48, mitochondrial	RM48_MOUSE	0.344424	0.000991277	0.00428951	1.62369e-05
Q9EQ80	Nif3l1	NIF3-like protein 1	NIF3L_MOUSE	-0.176446	0.000992597	0.00429196	0.000115309
Q8BP67	Rpl24	60S ribosomal protein L24	RL24_MOUSE	0.958263	0.000994254	0.00429587	0.000122379
O08532	Cacna2d1	Voltage-dependent calcium channel subunit alpha-2/delta-1	CA2D1_MOUSE	0.511079	0.000998767	0.0043121	0.000118142
O70311	Nmt2	Glycylpeptide N-tetradecanoyltransferase 2	NMT2_MOUSE	0.786509	0.00100558	0.00433263	1.87899e-05
P27601	Gna13	Guanine nucleotide-binding protein subunit alpha-13	GNA13_MOUSE	-0.651133	0.00100623	0.00433263	0.000145742
Q7TSN6	Gpr151	G-protein coupled receptor 151 protein	GP151_MOUSE	-4.96739	0.00100639	0.00433263	2.37695e-05
Q8R100	Calhm5	Calcium homeostasis modulator protein 5	CAHM5_MOUSE	0.782535	0.00100656	0.00433263	1.371e-06
Q8C650	Septin10	Septin-10	SEP10_MOUSE	-0.817329	0.00101035	0.00434363	1.24524e-05
Q8CAE9	Podxl2	Podocalyxin-like protein 2	PDXL2_MOUSE	-0.989682	0.00101064	0.00434363	1.07008e-05
Q80VP0	Tecpr1	Tectonin beta-propeller repeat-containing protein 1	TCPR1_MOUSE	0.28204	0.00102396	0.00439756	6.23445e-05
P38060	Hmgcl	Hydroxymethylglutaryl-CoA lyase, mitochondrial	HMGCL_MOUSE	0.508652	0.00102498	0.00439862	0.000103452
Q920A5	Scpep1	Retinoid-inducible serine carboxypeptidase	RISC_MOUSE	-1.19133	0.00102714	0.00440457	8.01934e-06
Q8CI61	Bag4	BAG family molecular chaperone regulator 4	BAG4_MOUSE	0.876283	0.00103162	0.00441874	9.65051e-06
P46660	Ina	Alpha-internexin	AINX_MOUSE	-1.16954	0.001032	0.00441874	0.00322592
Q64511	Top2b	DNA topoisomerase 2-beta	TOP2B_MOUSE	0.38439	0.00103277	0.00441875	1.80578e-05
Q9QXY6	Ehd3	EH domain-containing protein 3	EHD3_MOUSE	0.211197	0.00103384	0.00441997	0.000227561
Q9D4F2	Plpp6	Phospholipid phosphatase 6	PLPP6_MOUSE	0.683622	0.00103716	0.00443088	4.93347e-06
Q80TL4	Phf24	PHD finger protein 24	PHF24_MOUSE	0.653711	0.00104113	0.0044445	0.000430562
Q9D8W7	Ociad2	OCIA domain-containing protein 2	OCAD2_MOUSE	1.28631	0.00104334	0.00445059	4.35366e-05
Q0VBL3	Rbm15	RNA-binding protein 15	RBM15_MOUSE	1.07033	0.00104431	0.0044514	7.05639e-06
O08967	Cyth3	Cytohesin-3	CYH3_MOUSE	0.689806	0.00105008	0.00447264	3.09866e-05
Q64008	Rab34	Ras-related protein Rab-34	RAB34_MOUSE	-0.424091	0.00105428	0.00448717	4.48883e-06
Q3URD3	Slmap	Sarcolemmal membrane-associated protein	SLMAP_MOUSE	0.63364	0.00105788	0.00449915	3.26132e-05
O88704	Hcn1	Potassium/sodium hyperpolarization-activated cyclic nucleotide-gated channel 1	HCN1_MOUSE	-0.53672	0.00105925	0.00450052	3.78618e-05
P48320	Gad2	Glutamate decarboxylase 2	DCE2_MOUSE	-0.52533	0.00105978	0.00450052	0.000603456
Q00612	G6pdx	Glucose-6-phosphate 1-dehydrogenase X	G6PD1_MOUSE	-0.516988	0.00106659	0.00452608	0.000128832
Q8C033	Arhgef10	Rho guanine nucleotide exchange factor 10	ARHGA_MOUSE	-1.1448	0.00107023	0.00453811	1.17312e-05
Q9CQE2	Tmem223	Transmembrane protein 223	TM223_MOUSE	0.30211	0.00107178	0.00454133	7.90554e-06
Q6P8X1	Snx6	Sorting nexin-6	SNX6_MOUSE	-0.107418	0.0010732	0.00454397	7.00591e-05
Q9D8B7	Jam3	Junctional adhesion molecule C	JAM3_MOUSE	-0.825398	0.00107425	0.00454504	0.000156318
Q9CQ56	Use1	Vesicle transport protein USE1	USE1_MOUSE	-0.536828	0.00107564	0.00454753	1.02595e-05
Q80TT8	Cul9	Cullin-9	CUL9_MOUSE	0.750652	0.00108002	0.00456266	2.14155e-06
Q9Z2D6	Mecp2	Methyl-CpG-binding protein 2	MECP2_MOUSE	0.497391	0.00108089	0.00456296	0.000110068
Q9D7N3	Mrps9	28S ribosomal protein S9, mitochondrial	RT09_MOUSE	0.349591	0.00108207	0.00456458	1.58634e-05
Q91Z38	Ttc1	Tetratricopeptide repeat protein 1	TTC1_MOUSE	-0.297209	0.00108659	0.00457923	6.39545e-05
Q8BKE6	Cyp20a1	Cytochrome P450 20A1	CP20A_MOUSE	-0.934776	0.00108787	0.00457923	3.53832e-06
Q05A62	Dnal1	Dynein light chain 1, axonemal	DNAL1_MOUSE	0.4659	0.00108853	0.00457923	2.17151e-05
P50428	Arsa	Arylsulfatase A	ARSA_MOUSE	-0.654074	0.00108876	0.00457923	2.12492e-05
Q9CWZ3	Rbm8a	RNA-binding protein 8A	RBM8A_MOUSE	0.39597	0.00109153	0.00458748	2.88681e-05
Q8BZ09	Slc25a21	Mitochondrial 2-oxodicarboxylate carrier	ODC_MOUSE	-0.683123	0.00109334	0.00459171	3.05173e-06
P17426	Ap2a1	AP-2 complex subunit alpha-1	AP2A1_MOUSE	0.696982	0.0010946	0.0045936	0.00046349
Q921F4	Hnrnpll	Heterogeneous nuclear ribonucleoprotein L-like	HNRLL_MOUSE	0.992262	0.00109642	0.00459786	3.18459e-05
Q9W2E1	stum	Protein stum	STUM_DROME	-1.15661	0.00109805	0.0046013	1.10095e-05
Q9CQF3	Nudt21	Cleavage and polyadenylation specificity factor subunit 5	CPSF5_MOUSE	0.645592	0.00109983	0.0046054	2.88997e-05
P28653	Bgn	Biglycan	PGS1_MOUSE	-4.1411	0.00110212	0.0046116	6.26233e-06
Q6A4J8	Usp7	Ubiquitin carboxyl-terminal hydrolase 7	UBP7_MOUSE	0.360183	0.00110313	0.00461243	5.95022e-05
Q8BFQ4	Wdr82	WD repeat-containing protein 82	WDR82_MOUSE	0.897473	0.00110468	0.0046155	7.65121e-06
Q9R1C7	Prpf40a	Pre-mRNA-processing factor 40 homolog A	PR40A_MOUSE	0.488074	0.00110705	0.00462202	9.31218e-06
Q80X80	C2cd2l	Phospholipid transfer protein C2CD2L	C2C2L_MOUSE	0.925572	0.00111174	0.00463822	0.000131315
P23819	Gria2	Glutamate receptor 2	GRIA2_MOUSE	1.5599	0.00111338	0.00464166	0.000122351
Q91Z67	Srgap2	SLIT-ROBO Rho GTPase-activating protein 2	SRGP2_MOUSE	0.236233	0.0011153	0.00464625	4.51526e-05
Q9CPQ1	Cox6c	Cytochrome c oxidase subunit 6C	COX6C_MOUSE	0.24094	0.0011224	0.00466788	0.0020359
Q3TCH7	Cul4a	Cullin-4A	CUL4A_MOUSE	0.392554	0.00112301	0.00466788	2.58134e-05
Q8BGB5	Limd2	LIM domain-containing protein 2	LIMD2_MOUSE	1.03935	0.00112308	0.00466788	1.45833e-05
Q6ZWR6	Syne1	Nesprin-1	SYNE1_MOUSE	0.594872	0.00112376	0.00466788	3.31531e-05
O88533	Ddc	Aromatic-L-amino-acid decarboxylase	DDC_MOUSE	0.891183	0.00112606	0.00467082	0.000273542
Q01338	Adra2a	Alpha-2A adrenergic receptor	ADA2A_MOUSE	-0.548571	0.00112611	0.00467082	9.34893e-06
O70318	Epb41l2	Band 4.1-like protein 2	E41L2_MOUSE	-0.395671	0.00112864	0.00467567	0.000341065
Q8VC42	Rmc1	Regulator of MON1-CCZ1 complex	RMC1_MOUSE	-0.173994	0.00112892	0.00467567	1.03271e-05
Q9Z0M5	Lipa	Lysosomal acid lipase/cholesteryl ester hydrolase	LICH_MOUSE	-1.12601	0.00113336	0.00468925	7.83692e-06
Q9R0X5	Rpgr	X-linked retinitis pigmentosa GTPase regulator	RPGR_MOUSE	0.620587	0.00113385	0.00468925	1.13335e-05
Q7M6Z0	Rtn4rl2	Reticulon-4 receptor-like 2	R4RL2_MOUSE	1.41206	0.00113696	0.00469874	9.69176e-06
Q3UTH8	Arhgef9	Rho guanine nucleotide exchange factor 9	ARHG9_MOUSE	0.744149	0.00114343	0.00472203	4.26854e-05
Q8BXJ8	Znf385b	Zinc finger protein 385B	Z385B_MOUSE	2.62642	0.00114724	0.00473434	2.03984e-06
Q9CTN8	Lhfpl3	LHFPL tetraspan subfamily member 3 protein	LHPL3_MOUSE	-1.5488	0.00115003	0.00474188	7.42333e-06
Q8CGV2	Tph2	Tryptophan 5-hydroxylase 2	TPH2_MOUSE	-1.67124	0.00115073	0.00474188	3.34316e-05
P51660	Hsd17b4	Peroxisomal multifunctional enzyme type 2	DHB4_MOUSE	-0.445623	0.00115224	0.00474465	9.62965e-05
Q6PEE2	Ctif	CBP80/20-dependent translation initiation factor	CTIF_MOUSE	-0.9248	0.0011539	0.00474533	7.87015e-06
Q62413	Epha6	Ephrin type-A receptor 6	EPHA6_MOUSE	0.414901	0.00115407	0.00474533	6.6115e-06
P26369	U2af2	Splicing factor U2AF 65 kDa subunit	U2AF2_MOUSE	0.549872	0.00115609	0.00475023	7.72887e-05
Q0VBF8	Stum	Protein stum homolog	STUM_MOUSE	1.52481	0.00115993	0.00475981	0.000188916
P97823	Lypla1	Acyl-protein thioesterase 1	LYPA1_MOUSE	-0.656493	0.00116009	0.00475981	3.84755e-05
Q9JKK1	Stx6	Syntaxin-6	STX6_MOUSE	0.305853	0.00116113	0.00476061	6.20497e-05
O35387	Hax1	HCLS1-associated protein X-1	HAX1_MOUSE	0.32656	0.00116353	0.00476703	2.31597e-05
Q60972	Rbbp4	Histone-binding protein RBBP4	RBBP4_MOUSE	0.733007	0.00116597	0.00477361	6.41205e-05
Q8C739	Fam110b	Protein FAM110B	F110B_MOUSE	0.863888	0.001169	0.00478259	4.37028e-06
Q8BWF0	Aldh5a1	Succinate-semialdehyde dehydrogenase, mitochondrial	SSDH_MOUSE	-0.445154	0.00117288	0.00478847	0.000956453
O35607	Bmpr2	Bone morphogenetic protein receptor type-2	BMPR2_MOUSE	0.399229	0.00117292	0.00478847	6.93625e-06
P61358	Rpl27	60S ribosomal protein L27	RL27_MOUSE	0.82571	0.00117296	0.00478847	6.73988e-05
P00920	Ca2	Carbonic anhydrase 2	CAH2_MOUSE	-1.12131	0.00117772	0.00480447	0.000931526
P10852	Slc3a2	4F2 cell-surface antigen heavy chain	4F2_MOUSE	-0.274267	0.0011794	0.00480786	0.000654212
P97772	Grm1	Metabotropic glutamate receptor 1	GRM1_MOUSE	0.771688	0.00118134	0.00481232	2.68719e-05
P35802	Gpm6a	Neuronal membrane glycoprotein M6-a	GPM6A_MOUSE	0.565552	0.00119109	0.00484858	0.00180213
P15864	Hist1h1c	Histone H1.2	H12_MOUSE	0.415458	0.00119235	0.00485024	0.000114274
P61965	Wdr5	WD repeat-containing protein 5	WDR5_MOUSE	0.642701	0.00119395	0.00485331	1.01138e-05
Q9ER73	Elp4	Elongator complex protein 4	ELP4_MOUSE	0.401608	0.00119985	0.00487058	9.46903e-05
Q99K23	Ufsp2	Ufm1-specific protease 2	UFSP2_MOUSE	-0.42871	0.00119991	0.00487058	1.46418e-05
Q69ZX8	Ablim3	Actin-binding LIM protein 3	ABLM3_MOUSE	0.872716	0.00120808	0.00489734	4.90702e-06
Q6P9J9	Ano6	Anoctamin-6	ANO6_MOUSE	-0.464603	0.00120841	0.00489734	3.20567e-06
P62329,P20065	Tmsb4x	Thymosin beta-4	TYB4_RAT,TYB4_MOUSE	0.41512	0.00120908	0.00489734	0.00272015
Q9ERK7	Chrnb2	Neuronal acetylcholine receptor subunit beta-2	ACHB2_MOUSE	-0.765116	0.00122544	0.00496009	3.95174e-06
B1AXH1	Nhsl2	NHS-like protein 2	NHSL2_MOUSE	1.5315	0.00122821	0.00496575	1.32835e-05
Q9CPW4	Arpc5	Actin-related protein 2/3 complex subunit 5	ARPC5_MOUSE	0.530091	0.00122858	0.00496575	0.000201882
Q76MZ3	Ppp2r1a	Serine/threonine-protein phosphatase 2A 65 kDa regulatory subunit A alpha isoform	2AAA_MOUSE	0.304442	0.00123085	0.00497138	0.00104619
P61294	Rab6b	Ras-related protein Rab-6B	RAB6B_MOUSE	-0.372127	0.00123533	0.00498478	0.000663616
O08989	Mras	Ras-related protein M-Ras	RASM_MOUSE	0.362948	0.00123592	0.00498478	6.27943e-05
Q61699	Hsph1	Heat shock protein 105 kDa	HS105_MOUSE	0.315049	0.00123841	0.00499131	0.000167091
Q9R1P3	Psmb2	Proteasome subunit beta type-2	PSB2_MOUSE	0.143857	0.00124309	0.00500662	0.000163635
Q9D0R2	Tars1	Threonine--tRNA ligase 1, cytoplasmic	SYTC_MOUSE	0.272385	0.00124549	0.00501273	5.71885e-05
O35621	Pmm1	Phosphomannomutase 1	PMM1_MOUSE	0.25083	0.00125207	0.00503566	8.0634e-05
Q2M3X8	Phactr1	Phosphatase and actin regulator 1	PHAR1_MOUSE	1.4333	0.00125317	0.00503656	0.000195715
P14131	Rps16	40S ribosomal protein S16	RS16_MOUSE	0.352165	0.00125531	0.0050416	0.000186896
Q9QZX7	Srr	Serine racemase	SRR_MOUSE	1.04938	0.00125775	0.00504781	0.000125311
Q9JJV4	Cacng4	Voltage-dependent calcium channel gamma-4 subunit	CCG4_MOUSE	1.76033	0.00125919	0.00505006	9.6484e-06
Q91VM5	Rbmxl1	RNA binding motif protein, X-linked-like-1	RMXL1_MOUSE	1.09925	0.00126144	0.0050555	0.000162214
P14152	Mdh1	Malate dehydrogenase, cytoplasmic	MDHC_MOUSE	-0.268927	0.00127406	0.00510252	0.00308646
Q61239	Fnta	Protein farnesyltransferase/geranylgeranyltransferase type-1 subunit alpha	FNTA_MOUSE	-0.607424	0.00127541	0.00510434	2.57826e-05
Q80U40	Rimbp2	RIMS-binding protein 2	RIMB2_MOUSE	0.794093	0.00127825	0.00511211	6.08044e-05
Q3UH93	Plxnd1	Plexin-D1	PLXD1_MOUSE	0.278253	0.00127999	0.00511291	3.93592e-05
Q6NXK7	Dpp10	Inactive dipeptidyl peptidase 10	DPP10_MOUSE	0.349939	0.00128025	0.00511291	0.000267816
Q9EPR4	Slc23a2	Solute carrier family 23 member 2	S23A2_MOUSE	-0.785994	0.00128523	0.00512923	2.61465e-05
Q570Y9	Deptor	DEP domain-containing mTOR-interacting protein	DPTOR_MOUSE	1.12021	0.00128963	0.00514043	1.41726e-06
Q8R2Z5	Vwa1	von Willebrand factor A domain-containing protein 1	VWA1_MOUSE	-0.922524	0.00128984	0.00514043	1.38046e-05
Q9DB32	Haghl	Hydroxyacylglutathione hydrolase-like protein	HAGHL_MOUSE	-0.906637	0.00129189	0.00514501	1.29344e-05
Q9D009	Lipt2	Putative lipoyltransferase 2, mitochondrial	LIPT2_MOUSE	0.894198	0.0012968	0.00516092	4.40355e-06
P41778	Pbx1	Pre-B-cell leukemia transcription factor 1	PBX1_MOUSE	1.40069	0.00129793	0.00516182	2.30478e-06
Q91Y97	Aldob	Fructose-bisphosphate aldolase B	ALDOB_MOUSE	-0.859047	0.00130222	0.00517473	0.000475853
Q9Z140	Cpne6	Copine-6	CPNE6_MOUSE	0.508241	0.00130299	0.00517473	0.000224496
Q6ZWN5	Rps9	40S ribosomal protein S9	RS9_MOUSE	0.428338	0.00130447	0.00517701	0.000275956
Q6NVE8	Wdr44	WD repeat-containing protein 44	WDR44_MOUSE	0.688364	0.00130703	0.00518355	3.03065e-05
Q8R5J9	Arl6ip5	PRA1 family protein 3	PRAF3_MOUSE	0.640088	0.00131342	0.00520529	0.000190948
P42225	Stat1	Signal transducer and activator of transcription 1	STAT1_MOUSE	-0.604237	0.00131494	0.00520757	1.05112e-05
Q9CPW2	Fdx2	Ferredoxin-2, mitochondrial	FDX2_MOUSE	0.412445	0.00131583	0.00520757	3.6741e-05
P62835	Rap1a	Ras-related protein Rap-1A	RAP1A_MOUSE	-0.859173	0.00131711	0.00520903	0.000193888
Q8BUH8	Senp7	Sentrin-specific protease 7	SENP7_MOUSE	0.980492	0.00132244	0.00522649	2.05675e-06
Q80YN3	Bcas1	Breast carcinoma-amplified sequence 1 homolog	BCAS1_MOUSE	-1.29143	0.00132515	0.00523356	0.000362731
Q3UKJ7	Smu1	WD40 repeat-containing protein SMU1	SMU1_MOUSE	0.461235	0.00133755	0.00527886	1.47e-05
Q8CCK0	H2afy2	Core histone macro-H2A.2	H2AW_MOUSE	0.757859	0.00133877	0.00528003	6.85733e-05
Q8BRN9	Cc2d1b	Coiled-coil and C2 domain-containing protein 1B	C2D1B_MOUSE	-0.717862	0.00134233	0.00529042	3.94621e-06
Q8BFZ2	Plppr1	Phospholipid phosphatase-related protein type 1	PLPR1_MOUSE	0.583433	0.0013438	0.00529255	4.45276e-05
P62627	Dynlrb1	Dynein light chain roadblock-type 1	DLRB1_MOUSE	-0.284246	0.0013465	0.00529531	0.000217631
P08074	Cbr2	Carbonyl reductase [NADPH] 2	CBR2_MOUSE	-2.88292	0.00134688	0.00529531	1.88394e-06
P05480	Src	Neuronal proto-oncogene tyrosine-protein kinase Src	SRC_MOUSE	0.402164	0.00134789	0.00529531	8.08011e-05
Q07409	Cntn3	Contactin-3	CNTN3_MOUSE	0.451516	0.00134822	0.00529531	2.13679e-05
P26041	Msn	Moesin	MOES_MOUSE	-0.394732	0.00135151	0.00530338	6.72893e-05
P15327	Bpgm	Bisphosphoglycerate mutase	PMGE_MOUSE	-0.246615	0.00135213	0.00530338	3.54199e-05
Q8BWM0	Ptges2	Prostaglandin E synthase 2	PGES2_MOUSE	-0.27142	0.00135788	0.00532226	4.48991e-05
P62080	Tspan5	Tetraspanin-5	TSN5_MOUSE	0.635077	0.00136352	0.0053354	1.57913e-05
Q9Z123	Sema4f	Semaphorin-4F	SEM4F_MOUSE	-0.419174	0.00136366	0.0053354	5.563e-06
P61967	Ap1s1	AP-1 complex subunit sigma-1A	AP1S1_MOUSE	0.641499	0.00136404	0.0053354	3.85278e-05
O08576	Rundc3a	RUN domain-containing protein 3A	RUN3A_MOUSE	-0.239913	0.00136618	0.0053378	3.55566e-05
P97412	Lyst	Lysosomal-trafficking regulator	LYST_MOUSE	0.314899	0.00136653	0.0053378	7.00816e-06
O55100	Syngr1	Synaptogyrin-1	SNG1_MOUSE	0.764159	0.00137348	0.00536128	0.000469825
Q8C167	Prepl	Prolyl endopeptidase-like	PPCEL_MOUSE	-0.938497	0.00137749	0.00537326	2.86021e-05
P11531	Dmd	Dystrophin	DMD_MOUSE	-0.485445	0.00138345	0.00539168	1.47642e-05
Q923S9	Rab30	Ras-related protein Rab-30	RAB30_MOUSE	-0.572372	0.00138411	0.00539168	2.90555e-05
Q99JT1	Gatb	Glutamyl-tRNA(Gln) amidotransferase subunit B, mitochondrial	GATB_MOUSE	0.858935	0.00138874	0.00540602	6.44985e-06
O88569	Hnrnpa2b1	Heterogeneous nuclear ribonucleoproteins A2/B1	ROA2_MOUSE	0.70574	0.00139405	0.00542298	0.00075831
Q9DCN1	Nudt12	Peroxisomal NADH pyrophosphatase NUDT12	NUD12_MOUSE	-0.957155	0.00139762	0.00543318	3.77624e-06
O35668	Hap1	Huntingtin-associated protein 1	HAP1_MOUSE	-0.611027	0.00140155	0.00544474	6.30356e-05
Q9JHZ2;Q9HCJ1;P58368	Ankh;ANKH;ankhb	Progressive ankylosis protein;Progressive ankylosis protein homolog;Progressive ankylosis protein homolog B	ANKH_MOUSE;ANKH_HUMAN;ANKHB_DANRE	-0.523355	0.00140546	0.00545596	3.75628e-06
Q6GQT5	Tmem151a	Transmembrane protein 151A	T151A_MOUSE	-0.706751	0.00140635	0.00545596	5.35735e-06
Q9D8Y1	Tmem126a	Transmembrane protein 126A	T126A_MOUSE	0.302672	0.00140913	0.00545752	6.19399e-05
Q8VHK5	Mlc1	Membrane protein MLC1	MLC1_MOUSE	-0.82107	0.00140967	0.00545752	5.02779e-05
Q6ZPJ0	Tex2	Testis-expressed protein 2	TEX2_MOUSE	-0.46219	0.00141031	0.00545752	1.42623e-05
O08807	Prdx4	Peroxiredoxin-4	PRDX4_MOUSE	-0.442788	0.00141058	0.00545752	1.51834e-05
P59759	Mrtfb	Myocardin-related transcription factor B	MRTFB_MOUSE	1.2829	0.00141303	0.00546326	3.11247e-05
Q640M6	Gdpd5	Glycerophosphodiester phosphodiesterase domain-containing protein 5	GDPD5_MOUSE	-0.591362	0.00141617	0.00546673	1.11037e-05
A2ALI5	Ajap1	Adherens junction-associated protein 1	AJAP1_MOUSE	0.800579	0.00141669	0.00546673	3.75444e-06
Q9ET30	Tm9sf3	Transmembrane 9 superfamily member 3	TM9S3_MOUSE	-0.210283	0.00141748	0.00546673	4.73161e-05
Q60847	Col12a1	Collagen alpha-1(XII) chain	COCA1_MOUSE	-0.92869	0.00141776	0.00546673	5.58475e-06
D3YXK2	Safb	Scaffold attachment factor B1	SAFB1_MOUSE	0.555482	0.00141872	0.00546673	4.81191e-05
Q9DC28	Csnk1d	Casein kinase I isoform delta	KC1D_MOUSE	0.810509	0.00142103	0.00546975	1.64231e-05
Q8R3Q6	Ccdc58	Coiled-coil domain-containing protein 58	CCD58_MOUSE	0.560455	0.00142154	0.00546975	2.69059e-05
Q9CPV4	Glod4	Glyoxalase domain-containing protein 4	GLOD4_MOUSE	-0.199327	0.00142238	0.00546975	0.000224482
Q8QZV4	Stk32c	Serine/threonine-protein kinase 32C	ST32C_MOUSE	0.542013	0.00142759	0.00548608	0.000107412
Q64310	Surf4	Surfeit locus protein 4	SURF4_MOUSE	0.383295	0.00142974	0.00548891	3.04617e-05
Q9Z204	Hnrnpc	Heterogeneous nuclear ribonucleoproteins C1/C2	HNRPC_MOUSE	0.671823	0.00143026	0.00548891	0.000290957
Q9QYF9	Ndrg3	Protein NDRG3	NDRG3_MOUSE	-0.333591	0.00143229	0.00549242	0.000138171
P40124	Cap1	Adenylyl cyclase-associated protein 1	CAP1_MOUSE	0.407171	0.0014331	0.00549242	0.000297693
Q812A2	Srgap3	SLIT-ROBO Rho GTPase-activating protein 3	SRGP3_MOUSE	0.300479	0.00143535	0.00549736	6.2331e-05
P62996	Tra2b	Transformer-2 protein homolog beta	TRA2B_MOUSE	0.530489	0.00143761	0.00550229	6.07392e-05
Q62203	Sf3a2	Splicing factor 3A subunit 2	SF3A2_MOUSE	0.582385	0.0014401	0.00550796	1.06699e-05
P07356	Anxa2	Annexin A2	ANXA2_MOUSE	-1.61145	0.00144102	0.00550796	2.38754e-05
Q8BYJ6	Tbc1d4	TBC1 domain family member 4	TBCD4_MOUSE	-1.06146	0.00144252	0.00551	3.57859e-06
P82198	Tgfbi	Transforming growth factor-beta-induced protein ig-h3	BGH3_MOUSE	-6.90449	0.00145024	0.00553258	1.05438e-06
Q9CXJ4	Abcb8	ATP-binding cassette sub-family B member 8, mitochondrial	ABCB8_MOUSE	0.473846	0.00145037	0.00553258	4.84622e-05
Q8R146	Apeh	Acylamino-acid-releasing enzyme	APEH_MOUSE	-0.51303	0.00145288	0.00553843	5.04835e-05
Q80WS3	Fbll1	rRNA/tRNA 2'-O-methyltransferase fibrillarin-like protein 1	FBLL1_MOUSE	1.01955	0.00146054	0.0055639	2.69473e-06
Q61559	Fcgrt	IgG receptor FcRn large subunit p51	FCGRN_MOUSE	-0.568984	0.00147026	0.0055955	8.54746e-06
P53986	Slc16a1	Monocarboxylate transporter 1	MOT1_MOUSE	-1.40142	0.00147079	0.0055955	7.16678e-05
P16460	Ass1	Argininosuccinate synthase	ASSY_MOUSE	0.241586	0.00147284	0.00559956	0.000295763
Q8CH18	Ccar1	Cell division cycle and apoptosis regulator protein 1	CCAR1_MOUSE	0.564839	0.00147756	0.00561374	2.38113e-05
Q9R0M4	Podxl	Podocalyxin	PODXL_MOUSE	-0.35747	0.00148212	0.00562628	1.92689e-05
Q9CR23	Tmem9	Transmembrane protein 9	TMEM9_MOUSE	-0.67082	0.00148287	0.00562628	9.18799e-06
Q6ZQK5	Acap2	Arf-GAP with coiled-coil, ANK repeat and PH domain-containing protein 2	ACAP2_MOUSE	0.20523	0.00148382	0.00562628	3.50049e-05
Q6PEB6	Mob4	MOB-like protein phocein	PHOCN_MOUSE	0.670671	0.00148758	0.00563677	9.4075e-05
Q8K0D7	Wrb	Tail-anchored protein insertion receptor WRB	WRB_MOUSE	0.501175	0.00149585	0.00566436	1.26833e-05
O54942	Cldn5	Claudin-5	CLD5_MOUSE	-0.993836	0.00150017	0.00567693	8.97431e-06
Q3V384	Afg1l	AFG1-like ATPase	AFG1L_MOUSE	-0.332652	0.00151064	0.00571275	2.00233e-05
Q9CR30	Josd2	Josephin-2	JOS2_MOUSE	-1.85447	0.00151201	0.00571415	9.89395e-06
Q8R3L5	Slco3a1	Solute carrier organic anion transporter family member 3A1	SO3A1_MOUSE	-0.698663	0.00151666	0.00572792	8.77818e-06
P35922	Fmr1	Synaptic functional regulator FMR1	FMR1_MOUSE	0.501431	0.00152019	0.00573712	1.10659e-05
P50429	Arsb	Arylsulfatase B	ARSB_MOUSE	0.137774	0.00152138	0.00573712	5.0862e-05
Q80TS7	Ddn	Dendrin	DEND_MOUSE	4.9401	0.00152292	0.00573712	1.96335e-06
Q8BYK5	Phactr3	Phosphatase and actin regulator 3	PHAR3_MOUSE	1.87167	0.00152312	0.00573712	2.63902e-06
P32738,Q03059	Chat	Choline O-acetyltransferase	CLAT_RAT,CLAT_MOUSE	2.03979	0.00152483	0.00573976	3.83741e-05
Q3UY51	Lrrc55	Leucine-rich repeat-containing protein 55	LRC55_MOUSE	-2.94494	0.00152593	0.00574013	4.39087e-06
Q4VBE8	Wdr18	WD repeat-containing protein 18	WDR18_MOUSE	0.870199	0.00152737	0.00574174	1.1948e-05
P56564	Slc1a3	Excitatory amino acid transporter 1	EAA1_MOUSE	0.9245	0.00153398	0.00576218	0.000594483
P48168,P20781	Glrb	Glycine receptor subunit beta	GLRB_MOUSE,GLRB_RAT	-3.26453	0.00153562	0.00576218	6.82496e-06
Q3UVX5	Grm5	Metabotropic glutamate receptor 5	GRM5_MOUSE	2.09332	0.00153584	0.00576218	7.92687e-05
Q80WQ2	Vac14	Protein VAC14 homolog	VAC14_MOUSE	-0.299068	0.00154411	0.0057894	3.26188e-05
P97952	Scn1b	Sodium channel subunit beta-1	SCN1B_MOUSE	-0.45504	0.00154644	0.0057943	9.21259e-05
Q9JLZ3	Auh	Methylglutaconyl-CoA hydratase, mitochondrial	AUHM_MOUSE	-0.702475	0.00154835	0.00579586	0.000458137
Q9Z1M0	P2rx7	P2X purinoceptor 7	P2RX7_MOUSE	-0.770526	0.00154888	0.00579586	9.1023e-06
Q9WVC3	Cav2	Caveolin-2	CAV2_MOUSE	-0.772042	0.00155091	0.00579963	5.84561e-06
O55126	Nipsnap2	Protein NipSnap homolog 2	NIPS2_MOUSE	0.590078	0.00155352	0.00580558	0.000367394
Q8BP47	Nars	Asparagine--tRNA ligase, cytoplasmic	SYNC_MOUSE	-0.382474	0.00155935	0.00582353	0.000126354
Q9CPS6,Q8K3P7	Hint3	Histidine triad nucleotide-binding protein 3	HINT3_MOUSE,HINT3_RAT	-0.448195	0.00157721	0.00588303	6.8156e-05
Q6PF93	Pik3c3	Phosphatidylinositol 3-kinase catalytic subunit type 3	PK3C3_MOUSE	0.329834	0.00157734	0.00588303	2.36218e-05
Q9CQW1	Ykt6	Synaptobrevin homolog YKT6	YKT6_MOUSE	0.424259	0.00158173	0.00589554	0.000132165
P70663	Sparcl1	SPARC-like protein 1	SPRL1_MOUSE	-1.48864	0.00158629	0.00590868	5.81381e-05
P45952	Acadm	Medium-chain specific acyl-CoA dehydrogenase, mitochondrial	ACADM_MOUSE	-0.287098	0.00158983	0.00591706	0.000152812
Q91X56	S1pr5	Sphingosine 1-phosphate receptor 5	S1PR5_MOUSE	-1.1604	0.00159062	0.00591706	1.22929e-05
Q8BY89	Slc44a2	Choline transporter-like protein 2	CTL2_MOUSE	-0.281594	0.00159513	0.00592998	0.000185693
Q91ZA3	Pcca	Propionyl-CoA carboxylase alpha chain, mitochondrial	PCCA_MOUSE	0.319699	0.00159637	0.0059307	0.000163154
O88532	Zfr	Zinc finger RNA-binding protein	ZFR_MOUSE	0.900697	0.00160105	0.00594423	2.16562e-05
Q9R0M6	Rab9a	Ras-related protein Rab-9A	RAB9A_MOUSE	-0.307578	0.00160259	0.00594606	5.32339e-05
Q3TFQ1	Spryd7	SPRY domain-containing protein 7	SPRY7_MOUSE	-0.349147	0.00160452	0.00594919	2.17959e-05
Q8BUY8	Gprasp2	G-protein coupled receptor-associated sorting protein 2	GASP2_MOUSE	-0.781165	0.00160552	0.00594919	5.43491e-06
Q80TI0	Gramd1b	Protein Aster-B	ASTRB_MOUSE	0.568572	0.00161581	0.00598344	9.7093e-06
Q99JH7	Clstn3	Calsyntenin-3	CSTN3_MOUSE	-0.649143	0.00162076	0.00599416	1.59838e-05
Q9CQ06	Mrpl24	39S ribosomal protein L24, mitochondrial	RM24_MOUSE	0.330702	0.00162081	0.00599416	3.24993e-05
Q810J8	Zfyve1	Zinc finger FYVE domain-containing protein 1	ZFYV1_MOUSE	0.202989	0.00162548	0.00600752	3.74622e-05
Q9CQ02	Commd4	COMM domain-containing protein 4	COMD4_MOUSE	-0.462349	0.0016299	0.00601994	5.57128e-06
Q9Z2W9	Gria3	Glutamate receptor 3	GRIA3_MOUSE	1.17047	0.00163287	0.00602702	6.03764e-05
O88986	Gcat	2-amino-3-ketobutyrate coenzyme A ligase, mitochondrial	KBL_MOUSE	-0.556068	0.0016471	0.00607563	1.84016e-05
Q8BZ60	Ston2	Stonin-2	STON2_MOUSE	-0.293747	0.00165035	0.00608325	7.81491e-06
Q9QYK9	Pnck	Calcium/calmodulin-dependent protein kinase type 1B	KCC1B_MOUSE	0.244737	0.00165131	0.00608325	1.83103e-05
P56212	Arpp19	cAMP-regulated phosphoprotein 19	ARP19_MOUSE	1.1575	0.00165408	0.00608953	0.000190604
P35565,P35564	Canx	Calnexin	CALX_RAT,CALX_MOUSE	-0.282316	0.00165661	0.00609492	0.000448417
P27600;Q03113	Gna12;GNA12	Guanine nucleotide-binding protein subunit alpha-12	GNA12_MOUSE;GNA12_HUMAN	-0.97237	0.00165956	0.0061003	1.43881e-05
Q91WC9	Daglb	Sn1-specific diacylglycerol lipase beta	DGLB_MOUSE	-0.478178	0.00166124	0.0061003	6.29006e-06
P70349	Hint1	Histidine triad nucleotide-binding protein 1	HINT1_MOUSE	-0.237686	0.00166128	0.0061003	0.00088105
Q9Z130	Hnrnpdl	Heterogeneous nuclear ribonucleoprotein D-like	HNRDL_MOUSE	0.737862	0.00166584	0.0061131	0.000191605
O70354	Ca11	Carbonic anhydrase-related protein 11	CAH11_MOUSE	1.31301	0.00167314	0.00613591	8.70574e-06
O54865	Gucy1b1	Guanylate cyclase soluble subunit beta-1	GCYB1_MOUSE	0.426325	0.00167573	0.00614147	0.000109025
Q9DCB4	Arpp21	cAMP-regulated phosphoprotein 21	ARP21_MOUSE	1.09169	0.00168596	0.00617498	0.000147512
P21300	Akr1b7	Aldo-keto reductase family 1 member B7	ALD1_MOUSE	-1.07385	0.00169544	0.00620571	1.5077e-05
Q61033,Q61029	Tmpo	Lamina-associated polypeptide 2, isoforms alpha/zeta,Lamina-associated polypeptide 2, isoforms beta/delta/epsilon/gamma	LAP2A_MOUSE,LAP2B_MOUSE	-0.158734	0.00169665	0.00620616	0.000100558
Q91YP0	L2hgdh	L-2-hydroxyglutarate dehydrogenase, mitochondrial	L2HDH_MOUSE	0.459986	0.00170034	0.00621569	4.23776e-05
Q6PAL8	Dennd5a	DENN domain-containing protein 5A	DEN5A_MOUSE	-0.759218	0.00170219	0.00621845	4.78641e-06
Q9D8V0	Hm13	Minor histocompatibility antigen H13	HM13_MOUSE	-0.639855	0.00170899	0.00623777	1.6059e-05
Q922H4	Gmppa	Mannose-1-phosphate guanyltransferase alpha	GMPPA_MOUSE	0.137675	0.00170967	0.00623777	2.66258e-05
Q99M87	Dnaja3	DnaJ homolog subfamily A member 3, mitochondrial	DNJA3_MOUSE	0.246895	0.00171205	0.00624245	9.33372e-05
Q9Z0G0	Gipc1	PDZ domain-containing protein GIPC1	GIPC1_MOUSE	0.257882	0.00171607	0.00625313	3.48208e-05
Q148V7	Relch	RAB11-binding protein RELCH	RELCH_MOUSE	0.447718	0.00173026	0.00630082	4.0325e-05
A6H5Z3	Exoc6b	Exocyst complex component 6B	EXC6B_MOUSE	0.24358	0.00173274	0.00630581	3.6882e-05
P16546	Sptan1	Spectrin alpha chain, non-erythrocytic 1	SPTN1_MOUSE	0.235843	0.00175038	0.00636071	0.00243354
O35409	Folh1	Glutamate carboxypeptidase 2	FOLH1_MOUSE	-1.44187	0.00175061	0.00636071	4.8308e-05
E9Q6B2	Ccdc85c	Coiled-coil domain-containing protein 85C	CC85C_MOUSE	0.402068	0.00175118	0.00636071	1.24476e-05
Q8CA71	Shisa4	Protein shisa-4	SHSA4_MOUSE	0.668317	0.00175717	0.00637841	7.86591e-05
Q61687	Atrx	Transcriptional regulator ATRX	ATRX_MOUSE	0.921428	0.0017718	0.00642157	2.38151e-06
Q3UFY7	Nt5c3b	7-methylguanosine phosphate-specific 5'-nucleotidase	5NT3B_MOUSE	-0.409109	0.00177196	0.00642157	1.63081e-05
Q9WV92	Epb41l3	Band 4.1-like protein 3	E41L3_MOUSE	-0.758314	0.00177244	0.00642157	0.000722958
Q8C547	Heatr5b	HEAT repeat-containing protein 5B	HTR5B_MOUSE	0.206836	0.00177715	0.00643349	1.16818e-05
Q68FL6	Mars	Methionine--tRNA ligase, cytoplasmic	SYMC_MOUSE	1.15364	0.00177799	0.00643349	5.85865e-05
Q8R313	Exoc6	Exocyst complex component 6	EXOC6_MOUSE	0.512263	0.0017811	0.00644068	1.66856e-05
Q9Z2P8	Vamp5	Vesicle-associated membrane protein 5	VAMP5_MOUSE	-1.51309	0.00178412	0.00644749	9.26777e-06
Q9WVK8	Cyp46a1	Cholesterol 24-hydroxylase	CP46A_MOUSE	0.912899	0.0017932	0.00647575	9.4009e-05
Q8BYI9	Tnr	Tenascin-R	TENR_MOUSE	-0.151621	0.00179421	0.00647575	0.000716441
P97449	Anpep	Aminopeptidase N	AMPN_MOUSE	-0.604369	0.00179976	0.00648807	1.46325e-05
P56395	Cyb5a	Cytochrome b5	CYB5_MOUSE	0.332723	0.00180074	0.00648807	7.47352e-05
Q60675	Lama2	Laminin subunit alpha-2	LAMA2_MOUSE	-0.571176	0.00180104	0.00648807	1.00039e-05
Q8C5L3;Q9NZN8	Cnot2;CNOT2	CCR4-NOT transcription complex subunit 2	CNOT2_MOUSE;CNOT2_HUMAN	0.583745	0.0018029	0.00649065	6.73765e-06
Q8K3F6	Kcnq3	Potassium voltage-gated channel subfamily KQT member 3	KCNQ3_MOUSE	0.946817	0.00180419	0.00649122	5.14717e-06
Q9D0Q7	Mrpl45	39S ribosomal protein L45, mitochondrial	RM45_MOUSE	0.201635	0.00180589	0.00649323	2.52547e-05
Q8BKX1	Baiap2	Brain-specific angiogenesis inhibitor 1-associated protein 2	BAIP2_MOUSE	0.98155	0.00181243	0.00651265	0.000210354
Q8C0Z1	Fam234a	Protein FAM234A	F234A_MOUSE	-0.797984	0.00181749	0.0065267	8.13854e-06
Q9WVK4	Ehd1	EH domain-containing protein 1	EHD1_MOUSE	0.145985	0.00183872	0.00659877	0.000284074
P97792	Cxadr	Coxsackievirus and adenovirus receptor homolog	CXAR_MOUSE	2.33995	0.00184308	0.00661025	8.6664e-06
Q8R502	Lrrc8c	Volume-regulated anion channel subunit LRRC8C	LRC8C_MOUSE	0.536156	0.00184735	0.00662034	1.05955e-05
Q9DCL9	Paics	Multifunctional protein ADE2	PUR6_MOUSE	-0.231973	0.00184821	0.00662034	0.000199733
Q8CHC4	Synj1	Synaptojanin-1	SYNJ1_MOUSE	0.320439	0.00184988	0.00662215	0.000416861
Q8K0T7	Unc13c	Protein unc-13 homolog C	UN13C_MOUSE	-1.43971	0.00185602	0.00663622	6.1124e-06
Q9JMG7	Hdgfl3	Hepatoma-derived growth factor-related protein 3	HDGR3_MOUSE	0.874086	0.00185908	0.00663622	0.000141511
Q5SVR0	Tbc1d9b	TBC1 domain family member 9B	TBC9B_MOUSE	-0.460303	0.00185932	0.00663622	1.54775e-05
Q8R1A4	Dock7	Dedicator of cytokinesis protein 7	DOCK7_MOUSE	0.295013	0.00185969	0.00663622	1.33201e-05
P84075;P84074	Hpca;HPCA	Neuron-specific calcium-binding protein hippocalcin	HPCA_MOUSE;HPCA_HUMAN	1.22518	0.00186058	0.00663622	0.00139219
P49817	Cav1	Caveolin-1	CAV1_MOUSE	-1.14468	0.00186082	0.00663622	4.7003e-05
P97799	Nrsn1	Neurensin-1	NRSN1_MOUSE	-0.40197	0.00186196	0.00663622	1.48868e-05
Q60973	Rbbp7	Histone-binding protein RBBP7	RBBP7_MOUSE	0.969139	0.00186824	0.00665272	1.56497e-05
Q922J9	Far1	Fatty acyl-CoA reductase 1	FACR1_MOUSE	-0.307457	0.00186892	0.00665272	7.30818e-06
G5E897	Poglut3	Protein O-glucosyltransferase 3	PLGT3_MOUSE	-0.797573	0.00187407	0.0066663	2.34441e-06
Q8VCD6	Reep2	Receptor expression-enhancing protein 2	REEP2_MOUSE	0.239287	0.00187508	0.0066663	8.32791e-05
Q99J36	Thumpd1	THUMP domain-containing protein 1	THUM1_MOUSE	1.1117	0.00187801	0.00666929	2.8821e-05
P56379	Atp5mpl	ATP synthase subunit ATP5MPL, mitochondrial	ATP68_MOUSE	0.38854	0.00187826	0.00666929	0.000232087
P52912	Tia1	Nucleolysin TIA-1	TIA1_MOUSE	1.05875	0.00188572	0.00669161	1.55888e-05
Q4VAE3	Tmem65	Transmembrane protein 65	TMM65_MOUSE	-0.237629	0.00188886	0.00669859	0.000210386
Q9CQF0	Mrpl11	39S ribosomal protein L11, mitochondrial	RM11_MOUSE	0.288735	0.00189932	0.00673148	2.06185e-05
O70161	Pip5k1c	Phosphatidylinositol 4-phosphate 5-kinase type-1 gamma	PI51C_MOUSE	0.676562	0.00190332	0.00674147	0.000111577
P27573	Mpz	Myelin protein P0	MYP0_MOUSE	-6.35799	0.00190519	0.00674391	6.22135e-05
Q6PIE5	Atp1a2	Sodium/potassium-transporting ATPase subunit alpha-2	AT1A2_MOUSE	-0.672862	0.0019112	0.00676023	0.0139142
Q62172	Ralbp1	RalA-binding protein 1	RBP1_MOUSE	0.22833	0.0019128	0.00676023	2.04519e-05
Q64331	Myo6	Unconventional myosin-VI	MYO6_MOUSE	-0.46255	0.0019141	0.00676023	6.16022e-05
P70302	Stim1	Stromal interaction molecule 1	STIM1_MOUSE	0.499208	0.00191455	0.00676023	4.13281e-05
Q7TNF0	Doc2a	Double C2-like domain-containing protein alpha	DOC2A_MOUSE	0.92531	0.00192127	0.00677976	3.14407e-05
Q9JI90	Rnf14	E3 ubiquitin-protein ligase RNF14	RNF14_MOUSE	-0.456649	0.00192697	0.00679565	5.75367e-05
O89084	Pde4a	cAMP-specific 3',5'-cyclic phosphodiesterase 4A	PDE4A_MOUSE	0.582022	0.00192952	0.00680045	3.75645e-05
Q3U2I3	Fam160a2	FTS and Hook-interacting protein	F16A2_MOUSE	1.02259	0.00193071	0.00680045	3.46322e-06
O35926	Cdk5r2	Cyclin-dependent kinase 5 activator 2	CD5R2_MOUSE	0.769843	0.00193831	0.00682301	2.97492e-06
Q9DCC8	Tomm20	Mitochondrial import receptor subunit TOM20 homolog	TOM20_MOUSE	0.413105	0.00194177	0.00683096	0.000150033
P97370	Atp1b3	Sodium/potassium-transporting ATPase subunit beta-3	AT1B3_MOUSE	-0.838835	0.0019473	0.00684618	0.000397116
Q8K2D3	Edc3	Enhancer of mRNA-decapping protein 3	EDC3_MOUSE	0.39886	0.00195443	0.00686702	1.02845e-05
Q9D964	Gatm	Glycine amidinotransferase, mitochondrial	GATM_MOUSE	-0.718275	0.00195617	0.00686889	1.69461e-05
P0C192	Lrrc4b	Leucine-rich repeat-containing protein 4B	LRC4B_MOUSE	0.856558	0.00195909	0.00687491	1.80388e-05
Q4V9Z5	Sez6l2	Seizure 6-like protein 2	SE6L2_MOUSE	-0.531761	0.00196062	0.00687605	5.8815e-05
Q921E2	Rab31	Ras-related protein Rab-31	RAB31_MOUSE	-0.902636	0.001965	0.00688716	4.57494e-05
Q3UTQ8	Cdkl5	Cyclin-dependent kinase-like 5	CDKL5_MOUSE	1.985	0.00196928	0.00689793	1.37295e-05
Q9WU84	Ccs	Copper chaperone for superoxide dismutase	CCS_MOUSE	-0.292641	0.00197446	0.00691183	1.14633e-05
P47791	Gsr	Glutathione reductase, mitochondrial	GSHR_MOUSE	0.204492	0.00197774	0.00691725	0.00013138
Q9CZD3	Gars	Glycine--tRNA ligase	GARS_MOUSE	-0.429226	0.00197844	0.00691725	0.000128429
Q9Z0H3;Q12824	Smarcb1;SMARCB1	SWI/SNF-related matrix-associated actin-dependent regulator of chromatin subfamily B member 1	SNF5_MOUSE;SNF5_HUMAN	1.03112	0.00198012	0.00691889	9.81363e-06
Q80TB8	Vat1l	Synaptic vesicle membrane protein VAT-1 homolog-like	VAT1L_MOUSE	-0.458193	0.00198569	0.00693408	0.000392782
O70507	Hcn4	Potassium/sodium hyperpolarization-activated cyclic nucleotide-gated channel 4	HCN4_MOUSE	-1.33013	0.00198757	0.00693564	2.13299e-05
Q8BK67	Rcc2	Protein RCC2	RCC2_MOUSE	0.911758	0.00198857	0.00693564	3.45853e-05
Q8K2T8	Paf1	RNA polymerase II-associated factor 1 homolog	PAF1_MOUSE	0.570351	0.00199364	0.0069491	3.38884e-06
Q9D773	Mrpl2	39S ribosomal protein L2, mitochondrial	RM02_MOUSE	0.676515	0.00200096	0.00697033	3.87184e-06
Q99LB2	Dhrs4	Dehydrogenase/reductase SDR family member 4	DHRS4_MOUSE	-0.271911	0.00200697	0.00698699	7.85617e-05
P47964	Rpl36	60S ribosomal protein L36	RL36_MOUSE	0.620047	0.00200864	0.00698853	0.000161169
P62751	Rpl23a	60S ribosomal protein L23a	RL23A_MOUSE	0.367647	0.00201213	0.00699642	0.000245638
P70265	Pfkfb2	6-phosphofructo-2-kinase/fructose-2,6-bisphosphatase 2	F262_MOUSE	-0.38819	0.00201469	0.00699878	1.67226e-05
Q3THE2	Myl12b	Myosin regulatory light chain 12B	ML12B_MOUSE	0.220324	0.00201526	0.00699878	0.000283743
Q8CIB5	Fermt2	Fermitin family homolog 2	FERM2_MOUSE	-0.706477	0.00201951	0.00700924	5.54919e-05
Q9DC50	Crot	Peroxisomal carnitine O-octanoyltransferase	OCTC_MOUSE	0.546764	0.00202327	0.00701804	5.33697e-06
P70408	Cdh10	Cadherin-10	CAD10_MOUSE	0.323938	0.00202488	0.00701932	1.88731e-05
Q61464	Znf638	Zinc finger protein 638	ZN638_MOUSE	0.785809	0.00202853	0.00702771	7.28789e-06
O70293	Grk6	G protein-coupled receptor kinase 6	GRK6_MOUSE	0.838198	0.00203126	0.00703288	9.05633e-06
P12658	Calb1	Calbindin	CALB1_MOUSE	0.944429	0.00204868	0.00708891	0.000396237
Q60673	Ptprn	Receptor-type tyrosine-protein phosphatase-like N	PTPRN_MOUSE	-0.313766	0.00206874	0.00715397	3.84862e-05
Q8VE99	Ccdc115	Coiled-coil domain-containing protein 115	CC115_MOUSE	0.225285	0.00207012	0.00715442	5.55946e-06
O35737	Hnrnph1	Heterogeneous nuclear ribonucleoprotein H	HNRH1_MOUSE	0.654863	0.00207179	0.00715585	0.000276081
Q9CYI4	Luc7l	Putative RNA-binding protein Luc7-like 1	LUC7L_MOUSE	0.583099	0.00207854	0.00717481	1.65975e-05
Q8C2E7	Washc5	WASH complex subunit 5	WASC5_MOUSE	0.637779	0.00208362	0.00718798	2.9106e-05
Q05BC3	Eml1	Echinoderm microtubule-associated protein-like 1	EMAL1_MOUSE	-0.924718	0.00208738	0.00719661	5.29356e-05
P33175	Kif5a	Kinesin heavy chain isoform 5A	KIF5A_MOUSE	-0.514712	0.00208994	0.00720107	1.76543e-05
Q8QZY6	Tspan14	Tetraspanin-14	TSN14_MOUSE	-0.615598	0.0020962	0.00721669	6.08087e-06
Q6I6G8	Hecw2	E3 ubiquitin-protein ligase HECW2	HECW2_MOUSE	0.343593	0.00209701	0.00721669	1.71427e-05
Q8VHP7	Serpinb1b	Leukocyte elastase inhibitor B	ILEUB_MOUSE	-0.75781	0.00209845	0.00721729	6.54286e-06
Q9DB16	Cab39l	Calcium-binding protein 39-like	CB39L_MOUSE	-0.827213	0.0021106	0.00725472	1.01601e-05
Q9CYN9	Atp6ap2	Renin receptor	RENR_MOUSE	0.307463	0.00211681	0.00727166	9.58714e-05
Q61626	Grik5	Glutamate receptor ionotropic, kainate 5	GRIK5_MOUSE	2.26221	0.0021229	0.00728818	6.09968e-06
Q91XF0	Pnpo	Pyridoxine-5'-phosphate oxidase	PNPO_MOUSE	-0.373641	0.00212995	0.00730729	0.000133054
O35316	Slc6a6	Sodium- and chloride-dependent taurine transporter	SC6A6_MOUSE	0.660591	0.00213103	0.00730729	1.46262e-05
B2RQC6	Cad	CAD protein	PYR1_MOUSE	-0.33107	0.00213841	0.00732373	1.42866e-05
P58021	Tm9sf2	Transmembrane 9 superfamily member 2	TM9S2_MOUSE	-0.291736	0.00213887	0.00732373	4.37058e-05
Q61768	Kif5b	Kinesin-1 heavy chain	KINH_MOUSE	-0.537717	0.00213968	0.00732373	0.000243512
Q9JMG4	Nkain4	Sodium/potassium-transporting ATPase subunit beta-1-interacting protein 4	NKAI4_MOUSE	-0.747382	0.00215325	0.00736577	6.98962e-06
Q9CQ28	Dph6	Diphthine--ammonia ligase	DPH6_MOUSE	0.750552	0.00215506	0.00736755	3.50839e-06
Q4FK66	Prpf38a	Pre-mRNA-splicing factor 38A	PR38A_MOUSE	0.50514	0.0021716	0.00741965	1.13843e-05
Q3V3R4	Itga1	Integrin alpha-1	ITA1_MOUSE	-0.644986	0.00217567	0.00742746	1.14013e-05
Q3U7U3	Fbxo7	F-box only protein 7	FBX7_MOUSE	-0.188443	0.0021765	0.00742746	2.22938e-05
Q9JMH9	Myo18a	Unconventional myosin-XVIIIa	MY18A_MOUSE	-0.289154	0.00218705	0.00745902	8.71343e-05
Q07646	Mest	Mesoderm-specific transcript protein	MEST_MOUSE	1.08099	0.00219344	0.00747633	6.23721e-06
P59999	Arpc4	Actin-related protein 2/3 complex subunit 4	ARPC4_MOUSE	0.618337	0.00220672	0.00751708	0.000640587
Q9CR62	Slc25a11	Mitochondrial 2-oxoglutarate/malate carrier protein	M2OM_MOUSE	0.405791	0.00221415	0.00753791	0.000628262
Q8CI96	Clip4	CAP-Gly domain-containing linker protein 4	CLIP4_MOUSE	0.583524	0.00221889	0.00754686	7.40364e-06
O35417	Pdyn	Proenkephalin-B	PDYN_MOUSE	-1.03683	0.00222046	0.00754686	5.66008e-05
Q8BFQ8	Gatd1	Glutamine amidotransferase-like class 1 domain-containing protein 1	GALD1_MOUSE	0.209427	0.00222104	0.00754686	7.26343e-05
Q8BGR9	Ublcp1	Ubiquitin-like domain-containing CTD phosphatase 1	UBCP1_MOUSE	-1.02275	0.00222208	0.00754686	8.11171e-06
Q8BZN6	Dock10	Dedicator of cytokinesis protein 10	DOC10_MOUSE	0.624888	0.00222913	0.0075663	1.5303e-05
Q8BGN2	D3Ertd751e	UPF0462 protein C4orf33 homolog	CD033_MOUSE	-0.828269	0.00223491	0.00757622	3.43754e-06
Q9EQF6	Dpysl5	Dihydropyrimidinase-related protein 5	DPYL5_MOUSE	-0.231969	0.00223574	0.00757622	0.000295003
Q8CH25	Sltm	SAFB-like transcription modulator	SLTM_MOUSE	0.526673	0.00223604	0.00757622	9.06614e-06
P35276	Rab3d	Ras-related protein Rab-3D	RAB3D_MOUSE	0.64109	0.00224495	0.00760188	0.000625236
Q9JI91	Actn2	Alpha-actinin-2	ACTN2_MOUSE	1.74629	0.00224733	0.00760542	0.000180938
Q9CPR7	Sike1	Suppressor of IKBKE 1	SIKE1_MOUSE	0.61623	0.00225588	0.00762708	8.27597e-06
Q9JKY0	Cnot9	CCR4-NOT transcription complex subunit 9	CNOT9_MOUSE	0.271757	0.00225769	0.00762708	5.54689e-06
Q9Z0R6	Itsn2	Intersectin-2	ITSN2_MOUSE	0.701871	0.00225775	0.00762708	1.05073e-05
Q6NXM2	Rcbtb1	RCC1 and BTB domain-containing protein 1	RCBT1_MOUSE	-0.79548	0.00226193	0.0076367	4.87415e-06
Q9DCB8	Isca2	Iron-sulfur cluster assembly 2 homolog, mitochondrial	ISCA2_MOUSE	-0.242675	0.00227349	0.00766795	7.47608e-05
Q9JJE4	Paqr4	Progestin and adipoQ receptor family member 4	PAQR4_MOUSE	-0.897453	0.00227388	0.00766795	6.33632e-06
O35098	Dpysl4	Dihydropyrimidinase-related protein 4	DPYL4_MOUSE	0.323384	0.00227688	0.00767353	0.000366378
Q8CHE4	Phlpp1	PH domain leucine-rich repeat-containing protein phosphatase 1	PHLP1_MOUSE	-0.778097	0.00227921	0.00767684	3.77004e-06
Q8BSL7	Arf2	ADP-ribosylation factor 2	ARF2_MOUSE	-0.62919	0.00228657	0.00769708	3.42282e-05
P63168	Dynll1	Dynein light chain 1, cytoplasmic	DYL1_MOUSE	0.677829	0.00228943	0.00770218	0.000149329
Q99L13	Hibadh	3-hydroxyisobutyrate dehydrogenase, mitochondrial	3HIDH_MOUSE	-0.473001	0.00229083	0.00770231	0.00029835
Q0P678	Zc3h18	Zinc finger CCCH domain-containing protein 18	ZCH18_MOUSE	0.662934	0.00229581	0.0077145	5.36526e-06
P50136	Bckdha	2-oxoisovalerate dehydrogenase subunit alpha, mitochondrial	ODBA_MOUSE	-0.246487	0.00230282	0.00773351	2.2513e-05
P63137	Gabrb2	Gamma-aminobutyric acid receptor subunit beta-2	GBRB2_MOUSE	-0.571228	0.00230458	0.00773488	7.71859e-05
Q66L42	Map3k10	Mitogen-activated protein kinase kinase kinase 10	M3K10_MOUSE	0.605844	0.00231721	0.00777268	2.95109e-06
O54833	Csnk2a2	Casein kinase II subunit alpha'	CSK22_MOUSE	0.631346	0.00231868	0.00777305	3.80268e-05
Q7TMS5	Abcg2	Broad substrate specificity ATP-binding cassette transporter ABCG2	ABCG2_MOUSE	0.37003	0.0023224	0.00778093	1.65744e-05
Q80T41	Gabbr2	Gamma-aminobutyric acid type B receptor subunit 2	GABR2_MOUSE	-0.508637	0.00232618	0.00778726	8.55443e-05
Q9CQ89	Cuta	Protein CutA	CUTA_MOUSE	-0.334525	0.00232702	0.00778726	8.56586e-05
Q03717	Kcnb1	Potassium voltage-gated channel subfamily B member 1	KCNB1_MOUSE	2.55129	0.00233589	0.00781234	5.33289e-06
O70362	Gpld1	Phosphatidylinositol-glycan-specific phospholipase D	PHLD_MOUSE	-0.978079	0.00234569	0.0078394	5.70934e-06
Q8CCH2	Nhlrc3	NHL repeat-containing protein 3	NHLC3_MOUSE	-0.49148	0.00234673	0.0078394	3.38892e-06
Q3UN02	Lclat1	Lysocardiolipin acyltransferase 1	LCLT1_MOUSE	0.824739	0.00235385	0.00785857	2.63652e-05
Q3V038	Ttc9	Tetratricopeptide repeat protein 9A	TTC9A_MOUSE	-0.180693	0.00235942	0.00787255	2.42744e-05
Q920Q6	Msi2	RNA-binding protein Musashi homolog 2	MSI2H_MOUSE	-0.889603	0.00236658	0.00789076	3.56475e-05
Q32NY4	Cnnm3	Metal transporter CNNM3	CNNM3_MOUSE	-0.375156	0.00236764	0.00789076	9.45145e-06
Q8VHH5	Agap3	Arf-GAP with GTPase, ANK repeat and PH domain-containing protein 3	AGAP3_MOUSE	0.415178	0.00236993	0.00789375	9.28716e-05
Q9R088	Tk2	Thymidine kinase 2, mitochondrial	KITM_MOUSE	0.332681	0.00237192	0.00789577	1.86302e-05
Q8CFP6	Dnajc27	DnaJ homolog subfamily C member 27	DJC27_MOUSE	-0.251182	0.00237485	0.00790093	1.24681e-05
Q8BH43	Wasf2	Wiskott-Aldrich syndrome protein family member 2	WASF2_MOUSE	-0.236533	0.00237956	0.00791196	2.28741e-05
Q9QYB8,Q05764	Add2	Beta-adducin	ADDB_MOUSE,ADDB_RAT	0.556205	0.00238286	0.00791569	0.00040239
Q9D0K2	Oxct1	Succinyl-CoA:3-ketoacid coenzyme A transferase 1, mitochondrial	SCOT1_MOUSE	0.618298	0.00238346	0.00791569	0.000637159
Q62226;Q15465	Shh;SHH	Sonic hedgehog protein	SHH_MOUSE;SHH_HUMAN	-1.06627	0.00238587	0.00791908	2.84097e-06
P43275,Q02539	H1-1	Histone H1.1	H11_MOUSE,H11_HUMAN	1.69354	0.00238733	0.00791932	2.44852e-05
Q99MR0	Actl6b	Actin-like protein 6B	ACL6B_MOUSE	0.725774	0.00239647	0.00794501	2.13e-05
Q9QXL8	Nme7	Nucleoside diphosphate kinase 7	NDK7_MOUSE	0.586381	0.00240259	0.00796066	7.35792e-06
Q9DCN2	Cyb5r3	NADH-cytochrome b5 reductase 3	NB5R3_MOUSE	0.37749	0.00240834	0.00797508	0.000268711
Q04857	Col6a1	Collagen alpha-1(VI) chain	CO6A1_MOUSE	-2.47105	0.00242322	0.0080197	1.41526e-05
P62849	Rps24	40S ribosomal protein S24	RS24_MOUSE	0.557009	0.00242819	0.00803149	4.29874e-05
Q6DFY8	Brinp2	BMP/retinoic acid-inducible neural-specific protein 2	BRNP2_MOUSE	1.12912	0.00243428	0.00804279	3.04775e-06
O89026	Robo1	Roundabout homolog 1	ROBO1_MOUSE	-0.620847	0.00243443	0.00804279	1.12252e-05
Q99K46	Usp11	Ubiquitin carboxyl-terminal hydrolase 11	UBP11_MOUSE	0.564618	0.00243941	0.00804998	2.63667e-05
Q811P8	Arhgap32	Rho GTPase-activating protein 32	RHG32_MOUSE	0.806566	0.00243943	0.00804998	3.98145e-05
Q9JIM1	Slc29a1	Equilibrative nucleoside transporter 1	S29A1_MOUSE	-0.565568	0.00244249	0.00805525	2.31449e-05
Q9JKZ2	Slc5a3	Sodium/myo-inositol cotransporter	SC5A3_MOUSE	-0.691483	0.00244412	0.00805525	3.85116e-06
P38585	Ttl	Tubulin--tyrosine ligase	TTL_MOUSE	0.573608	0.00244527	0.00805525	1.62605e-05
O88974	Setdb1	Histone-lysine N-methyltransferase SETDB1	SETB1_MOUSE	-0.730007	0.00244777	0.00805884	4.38358e-05
Q9Z2I0	Letm1	Mitochondrial proton/calcium exchanger protein	LETM1_MOUSE	0.207309	0.00245012	0.00806191	0.000270361
Q9R171	Cbln1	Cerebellin-1	CBLN1_MOUSE	-0.937419	0.00246344	0.00809978	2.80578e-05
Q80XA6	Reps2	RalBP1-associated Eps domain-containing protein 2	REPS2_MOUSE	0.330516	0.00246447	0.00809978	1.73603e-05
Q8BUM6	Fam163b	Protein FAM163B	F163B_MOUSE	3.57992	0.00246591	0.00809984	2.54434e-06
Q8BW41	Pomgnt2	Protein O-linked-mannose beta-1,4-N-acetylglucosaminyltransferase 2	PMGT2_MOUSE	-0.201106	0.00248128	0.00814563	3.0996e-05
Q8BGV8	Mief1	Mitochondrial dynamics protein MID51	MID51_MOUSE	0.316884	0.00248719	0.00816012	7.7656e-06
P28352	Apex1	DNA-(apurinic or apyrimidinic site) lyase	APEX1_MOUSE	1.27383	0.00248856	0.00816012	5.11258e-05
Q62092	Nsg1	Neuronal vesicle trafficking-associated protein 1	NSG1_MOUSE	-0.358536	0.00249628	0.0081807	1.03242e-05
Q61097	Ksr1	Kinase suppressor of Ras 1	KSR1_MOUSE	0.527894	0.0024977	0.0081807	1.23684e-05
Q8C4X2	Csnk1g3	Casein kinase I isoform gamma-3	KC1G3_MOUSE	0.284699	0.00250066	0.00818567	3.06369e-05
Q99MN9	Pccb	Propionyl-CoA carboxylase beta chain, mitochondrial	PCCB_MOUSE	0.229492	0.00250933	0.00820846	0.000177336
Q9DC70	Ndufs7	NADH dehydrogenase [ubiquinone] iron-sulfur protein 7, mitochondrial	NDUS7_MOUSE	0.344445	0.0025105	0.00820846	0.000518833
Q9Z268	Rasal1	RasGAP-activating-like protein 1	RASL1_MOUSE	1.33204	0.00251637	0.00822292	8.30257e-05
Q9Z2A9	Ggt5	Glutathione hydrolase 5 proenzyme	GGT5_MOUSE	-0.492978	0.00252392	0.00824011	2.6951e-06
Q99020	Hnrnpab	Heterogeneous nuclear ribonucleoprotein A/B	ROAA_MOUSE	0.721303	0.00252452	0.00824011	0.000216344
P16390	Kcna3	Potassium voltage-gated channel subfamily A member 3	KCNA3_MOUSE	-0.425531	0.0025267	0.0082425	1.49294e-05
Q5XJV6	Lmtk3	Serine/threonine-protein kinase LMTK3	LMTK3_MOUSE	0.824504	0.00252943	0.00824669	2.21011e-05
Q9EPU0	Upf1	Regulator of nonsense transcripts 1	RENT1_MOUSE	0.180449	0.00253356	0.00825545	3.68072e-05
P68368	Tuba4a	Tubulin alpha-4A chain	TBA4A_MOUSE	0.170159	0.00254712	0.00829486	0.00574105
Q6PD10	Ip6k1	Inositol hexakisphosphate kinase 1	IP6K1_MOUSE	-0.44259	0.00254979	0.00829884	7.16754e-06
Q9QYE9	Plekhb1	Pleckstrin homology domain-containing family B member 1	PKHB1_MOUSE	-1.26492	0.00255533	0.00831213	4.00982e-05
Q03173	Enah	Protein enabled homolog	ENAH_MOUSE	-0.544906	0.00255844	0.00831749	4.50763e-05
Q9EPJ9	Arfgap1	ADP-ribosylation factor GTPase-activating protein 1	ARFG1_MOUSE	0.330872	0.00256755	0.00834235	0.000106168
Q9CQV5	Mrps24	28S ribosomal protein S24, mitochondrial	RT24_MOUSE	0.532381	0.00257216	0.00835205	3.02738e-05
P97807	Fh	Fumarate hydratase, mitochondrial	FUMH_MOUSE	-0.218498	0.00257347	0.00835205	0.000513671
Q9CPU0	Glo1	Lactoylglutathione lyase	LGUL_MOUSE	-0.479493	0.00257986	0.00836801	0.000687991
Q9ES74	Nek7	Serine/threonine-protein kinase Nek7	NEK7_MOUSE	-0.641279	0.00258987	0.00839572	1.3137e-05
Q91YI0	Asl	Argininosuccinate lyase	ARLY_MOUSE	-0.630142	0.00259276	0.0084003	4.19634e-05
Q8JZY2	Commd10	COMM domain-containing protein 10	COMDA_MOUSE	-0.133361	0.00259492	0.00840252	3.71221e-05
Q8QZR5	Gpt	Alanine aminotransferase 1	ALAT1_MOUSE	-0.665284	0.00260328	0.0084248	2.74286e-05
Q9EQK7	Icmt	Protein-S-isoprenylcysteine O-methyltransferase	ICMT_MOUSE	0.499114	0.00260714	0.00843251	1.71672e-05
Q8QZT1	Acat1	Acetyl-CoA acetyltransferase, mitochondrial	THIL_MOUSE	0.18995	0.00262253	0.00847747	0.000506058
Q3UHB8	Ccdc177	Coiled-coil domain-containing protein 177	CC177_MOUSE	0.524207	0.00263578	0.00851548	4.13262e-05
P83093	Stim2	Stromal interaction molecule 2	STIM2_MOUSE	1.13044	0.00264579	0.00854298	1.19735e-05
O88307	Sorl1	Sortilin-related receptor	SORL_MOUSE	-0.684285	0.00265311	0.00856177	7.54657e-06
Q9QUJ7	Acsl4	Long-chain-fatty-acid--CoA ligase 4	ACSL4_MOUSE	0.458429	0.00266054	0.00857877	7.70376e-06
P62281;P62280	Rps11;RPS11	40S ribosomal protein S11	RS11_MOUSE;RS11_HUMAN	0.261617	0.00266139	0.00857877	0.000101414
Q62523	Zyx	Zyxin	ZYX_MOUSE	-0.60698	0.00266686	0.00859153	5.04638e-05
Q99JW2	Acy1	Aminoacylase-1	ACY1_MOUSE	-0.380952	0.00267589	0.00861577	5.99629e-05
Q9R059	Fhl3	Four and a half LIM domains protein 3	FHL3_MOUSE	-2.07223	0.00268619	0.00864404	1.76134e-06
P28740	Kif2a	Kinesin-like protein KIF2A	KIF2A_MOUSE	-0.197281	0.00269445	0.00866571	0.000182928
P63280	Ube2i	SUMO-conjugating enzyme UBC9	UBC9_MOUSE	0.798574	0.00271539	0.00872814	0.000108126
Q8K2Q7	Brox	BRO1 domain-containing protein BROX	BROX_MOUSE	-0.295875	0.00271783	0.00873108	3.91633e-05
Q9JI39	Abcb10	ATP-binding cassette sub-family B member 10, mitochondrial	ABCBA_MOUSE	-0.164489	0.00272274	0.00874192	6.25467e-06
P32067	Ssb	Lupus La protein homolog	LA_MOUSE	0.517333	0.0027268	0.00875003	9.70152e-05
Q8CB44	Gramd4	GRAM domain-containing protein 4	GRAM4_MOUSE	0.226089	0.00273362	0.00876188	5.11895e-06
Q80T79	Csmd3	CUB and sushi domain-containing protein 3	CSMD3_MOUSE	1.2685	0.00273405	0.00876188	3.2994e-06
Q6P1I6	Psd2	PH and SEC7 domain-containing protein 2	PSD2_MOUSE	-0.765969	0.00273511	0.00876188	8.38577e-06
Q80U95	Ube3c	Ubiquitin-protein ligase E3C	UBE3C_MOUSE	-0.367793	0.0027391	0.00876973	3.19398e-05
Q6ZPE2	Sbf1	Myotubularin-related protein 5	MTMR5_MOUSE	0.397482	0.00274633	0.00878793	4.98428e-05
Q04899	Cdk18	Cyclin-dependent kinase 18	CDK18_MOUSE	0.217579	0.00275296	0.00880423	2.12738e-05
Q9CRB2	Nhp2	H/ACA ribonucleoprotein complex subunit 2	NHP2_MOUSE	0.630155	0.00275728	0.00881137	1.27595e-05
Q9QXJ4	Arl10	ADP-ribosylation factor-like protein 10	ARL10_MOUSE	-1.44734	0.00275829	0.00881137	5.5803e-06
Q80UP8	Slc20a2	Sodium-dependent phosphate transporter 2	S20A2_MOUSE	-0.732375	0.00276	0.00881189	3.2507e-05
O35089	Cnih2	Protein cornichon homolog 2	CNIH2_MOUSE	2.86855	0.00277211	0.00884361	3.84853e-05
Q9WVJ5	Crybb1	Beta-crystallin B1	CRBB1_MOUSE	0.478183	0.00277304	0.00884361	6.42123e-06
Q9WV91	Ptgfrn	Prostaglandin F2 receptor negative regulator	FPRP_MOUSE	0.760405	0.00278457	0.0088707	3.41886e-06
Q80V91	Dtx3	Probable E3 ubiquitin-protein ligase DTX3	DTX3_MOUSE	0.185767	0.00278464	0.0088707	1.77171e-05
Q91XM9	Dlg2	Disks large homolog 2	DLG2_MOUSE	0.782683	0.00279274	0.00889152	0.000164259
Q9CZY3	Ube2v1	Ubiquitin-conjugating enzyme E2 variant 1	UB2V1_MOUSE	-0.187177	0.0027993	0.00890742	0.000990015
Q01063	Pde4d	cAMP-specific 3',5'-cyclic phosphodiesterase 4D	PDE4D_MOUSE	0.668281	0.00280929	0.00893422	1.89333e-05
Q8C863	Itch	E3 ubiquitin-protein ligase Itchy	ITCH_MOUSE	-1.60922	0.00281129	0.0089356	5.23747e-05
Q8BGT7	Smndc1	Survival of motor neuron-related-splicing factor 30	SPF30_MOUSE	0.68423	0.0028494	0.00905168	6.10188e-06
Q8BI72	Cdkn2aip	CDKN2A-interacting protein	CARF_MOUSE	0.717188	0.00285243	0.00905626	1.08972e-05
Q9D358	Acp1	Low molecular weight phosphotyrosine protein phosphatase	PPAC_MOUSE	-0.142217	0.0028652	0.0090872	0.000261706
Q80Y24	Prickle2	Prickle-like protein 2	PRIC2_MOUSE	0.469805	0.00286536	0.0090872	2.9198e-05
Q99JI1	Mustn1	Musculoskeletal embryonic nuclear protein 1	MSTN1_MOUSE	-1.76595	0.00287392	0.0091079	6.65043e-06
Q02248	Ctnnb1	Catenin beta-1	CTNB1_MOUSE	0.300067	0.00287694	0.0091079	0.000193197
Q9QY81	Nup210	Nuclear pore membrane glycoprotein 210	PO210_MOUSE	0.765061	0.00287726	0.0091079	5.74097e-06
P97770	Thumpd3	THUMP domain-containing protein 3	THUM3_MOUSE	-0.666109	0.00287886	0.0091079	6.3192e-06
P14824	Anxa6	Annexin A6	ANXA6_MOUSE	-0.383268	0.00288009	0.0091079	0.000406703
Q99JF8	Psip1	PC4 and SFRS1-interacting protein	PSIP1_MOUSE	0.791786	0.00288148	0.0091079	9.4882e-05
Q9CQA6	Chchd1	Coiled-coil-helix-coiled-coil-helix domain-containing protein 1	CHCH1_MOUSE	0.225221	0.00288579	0.00911648	1.31947e-05
P47963	Rpl13	60S ribosomal protein L13	RL13_MOUSE	0.735697	0.00288784	0.00911788	0.000117197
P58058	Nadk	NAD kinase	NADK_MOUSE	0.698266	0.00288997	0.00911956	3.70331e-06
P28658	Atxn10	Ataxin-10	ATX10_MOUSE	-0.690933	0.00290616	0.00916557	8.20178e-05
Q60805	Mertk	Tyrosine-protein kinase Mer	MERTK_MOUSE	0.463074	0.00291243	0.00917774	4.89067e-06
Q9QYI4	Dnajb12	DnaJ homolog subfamily B member 12	DJB12_MOUSE	0.411641	0.00291367	0.00917774	7.35109e-06
Q9JIP6;Q61090	Fzd2;Fzd7	Frizzled-2;Frizzled-7	FZD2_MOUSE;FZD7_MOUSE	0.628438	0.00291485	0.00917774	9.34992e-06
Q8BK08	Tmem11	Transmembrane protein 11, mitochondrial	TMM11_MOUSE	0.257534	0.00291978	0.0091882	4.85603e-05
Q9D7B6	Acad8	Isobutyryl-CoA dehydrogenase, mitochondrial	ACAD8_MOUSE	-0.263705	0.0029301	0.00921275	7.80707e-05
B1AVZ0	Uprt	Uracil phosphoribosyltransferase homolog	UPP_MOUSE	-0.336683	0.00293082	0.00921275	1.35101e-05
Q8CBG9	Rnf170	E3 ubiquitin-protein ligase RNF170	RN170_MOUSE	0.240885	0.00294609	0.00925566	1.34829e-05
Q91ZR2	Snx18	Sorting nexin-18	SNX18_MOUSE	-0.621994	0.0029528	0.00927164	1.17747e-05
O08583	Alyref	THO complex subunit 4	THOC4_MOUSE	0.50867	0.00298178	0.00935747	5.83986e-05
Q9EQJ9	Magi3	Membrane-associated guanylate kinase, WW and PDZ domain-containing protein 3	MAGI3_MOUSE	-0.747825	0.00298623	0.00936628	1.32357e-05
P62715	Ppp2cb	Serine/threonine-protein phosphatase 2A catalytic subunit beta isoform	PP2AB_MOUSE	0.375598	0.00299492	0.00938836	6.96088e-05
P70303	Ctps2	CTP synthase 2	PYRG2_MOUSE	-0.574435	0.00299696	0.0093884	1.57185e-05
Q5SWP3	Nacad	NAC-alpha domain-containing protein 1	NACAD_MOUSE	-1.09457	0.00299956	0.0093884	8.58469e-06
Q9DC53	Cpne8	Copine-8	CPNE8_MOUSE	0.589986	0.00299987	0.0093884	9.55937e-06
Q9JKX6	Nudt5	ADP-sugar pyrophosphatase	NUDT5_MOUSE	-0.420528	0.00301655	0.00943541	3.85416e-05
Q922H1	Prmt3	Protein arginine N-methyltransferase 3	ANM3_MOUSE	-0.603967	0.00303108	0.00947566	8.89219e-06
Q61554	Fbn1	Fibrillin-1	FBN1_MOUSE	-5.35363	0.00303671	0.00948804	1.5376e-06
Q64299	Ccn3	CCN family member 3	CCN3_MOUSE	2.43987	0.00303986	0.00949269	1.47507e-06
P97429	Anxa4	Annexin A4	ANXA4_MOUSE	-1.10266	0.00304411	0.00950075	8.56779e-06
P58774	Tpm2	Tropomyosin beta chain	TPM2_MOUSE	-1.28951	0.00304724	0.00950531	0.000235903
P01900,P14426,P01899,P14427,P01895	H2-D1	H-2 class I histocompatibility antigen, D-D alpha chain,H-2 class I histocompatibility antigen, D-K alpha chain,H-2 class I histocompatibility antigen, D-B alpha chain,H-2 class I histocompatibility antigen, D-P alpha chain,H-2 class I histocompatibility antigen, alpha chain (Fragment)	HA12_MOUSE,HA13_MOUSE,HA11_MOUSE,HA14_MOUSE,HA1Y_MOUSE	-0.720624	0.0030547	0.00952012	6.56224e-06
Q6P1B1	Xpnpep1	Xaa-Pro aminopeptidase 1	XPP1_MOUSE	0.266593	0.00305532	0.00952012	7.72366e-05
Q8BIV3	Ranbp6	Ran-binding protein 6	RNBP6_MOUSE	-0.423511	0.00305974	0.00952462	1.46191e-05
Q6PB66	Lrpprc	Leucine-rich PPR motif-containing protein, mitochondrial	LPPRC_MOUSE	0.272208	0.00306011	0.00952462	0.000129611
Q5M956;Q3URF8	Kctd1;Kctd21	BTB/POZ domain-containing protein KCTD1;BTB/POZ domain-containing protein KCTD21	KCTD1_MOUSE;KCD21_MOUSE	0.451432	0.00306207	0.00952551	1.18362e-05
Q9D882	Fam241b	Protein FAM241B	F241B_MOUSE	0.262049	0.00306593	0.00953232	3.74451e-05
Q9CQI3	Gmfb	Glia maturation factor beta	GMFB_MOUSE	0.313833	0.00307148	0.00954436	0.000246359
Q922V4	Plrg1	Pleiotropic regulator 1	PLRG1_MOUSE	0.713756	0.00308123	0.00956945	4.7956e-06
P19137	Lama1	Laminin subunit alpha-1	LAMA1_MOUSE	-0.933903	0.00308595	0.00957889	1.8195e-05
Q9DCZ4	Apoo	MICOS complex subunit Mic26	MIC26_MOUSE	0.329751	0.00309874	0.00961012	0.000565881
Q5SUF2	Luc7l3	Luc7-like protein 3	LC7L3_MOUSE	0.341268	0.00309939	0.00961012	9.53977e-06
Q9D1G1	Rab1b	Ras-related protein Rab-1B	RAB1B_MOUSE	0.142447	0.0031145	0.00965173	0.000395644
P33534	Oprk1	Kappa-type opioid receptor	OPRK_MOUSE	-0.732285	0.00313028	0.00969537	1.37382e-06
Q61418	Clcn4	H(+)/Cl(-) exchange transporter 4	CLCN4_MOUSE	-0.251193	0.00313417	0.00970215	1.32265e-05
O08539	Bin1	Myc box-dependent-interacting protein 1	BIN1_MOUSE	-0.202713	0.00314339	0.00972539	0.000333579
P41731	Cd63	CD63 antigen	CD63_MOUSE	-1.17504	0.0031479	0.00973006	1.54426e-05
O54829	Rgs7	Regulator of G-protein signaling 7	RGS7_MOUSE	0.411291	0.00314831	0.00973006	0.000113686
Q61937	Npm1	Nucleophosmin	NPM_MOUSE	0.861506	0.00315351	0.00974084	0.000151736
A2AWA9	Rabgap1	Rab GTPase-activating protein 1	RBGP1_MOUSE	0.33651	0.00315615	0.00974372	3.69237e-05
Q3V1U8	Elmod1	ELMO domain-containing protein 1	ELMD1_MOUSE	0.759251	0.00318433	0.00981806	3.67605e-05
Q91YY4	Atpaf2	ATP synthase mitochondrial F1 complex assembly factor 2	ATPF2_MOUSE	-0.6018	0.00318472	0.00981806	1.13758e-05
Q3UNA4	Nxt2	NTF2-related export protein 2	NXT2_MOUSE	-0.461802	0.0031854	0.00981806	2.37907e-06
Q99MS7	Ehbp1l1	EH domain-binding protein 1-like protein 1	EH1L1_MOUSE	1.25345	0.00319195	0.00983293	0.000214146
Q8BHZ0	Fam49a	Protein FAM49A	FA49A_MOUSE	0.606068	0.00323235	0.00994809	0.00016293
Q9WV95	Phlda3	Pleckstrin homology-like domain family A member 3	PHLA3_MOUSE	-1.59118	0.00323282	0.00994809	2.89348e-06
O88796	Rpp30	Ribonuclease P protein subunit p30	RPP30_MOUSE	0.399488	0.0032493	0.00999299	3.72926e-06
Q5SVQ0	Kat7	Histone acetyltransferase KAT7	KAT7_MOUSE	1.1	0.00325092	0.00999299	2.34578e-06
Q6A065	Cep170	Centrosomal protein of 170 kDa	CE170_MOUSE	0.520942	0.00326426	0.0100286	3.7044e-05
P53995	Anapc1	Anaphase-promoting complex subunit 1	APC1_MOUSE	0.31706	0.00328235	0.0100787	9.0713e-06
O88502	Pde8a	High affinity cAMP-specific and IBMX-insensitive 3',5'-cyclic phosphodiesterase 8A	PDE8A_MOUSE	-1.15617	0.00328936	0.0100948	1.32683e-05
P60487	Pdxp	Pyridoxal phosphate phosphatase	PLPP_MOUSE	0.346539	0.00329451	0.0101052	0.000341419
Q9Z110	Aldh18a1	Delta-1-pyrroline-5-carboxylate synthase	P5CS_MOUSE	-0.322415	0.00330949	0.0101457	7.0792e-05
Q80XN0	Bdh1	D-beta-hydroxybutyrate dehydrogenase, mitochondrial	BDH_MOUSE	0.192828	0.00331331	0.0101507	0.000452067
P08553	Nefm	Neurofilament medium polypeptide	NFM_MOUSE	-1.37933	0.00331471	0.0101507	0.00294674
Q8BH79	Ano10	Anoctamin-10	ANO10_MOUSE	-0.592892	0.00332504	0.0101722	3.70347e-06
B2RWJ3	Tmem240	Transmembrane protein 240	TM240_MOUSE	2.42978	0.00332528	0.0101722	1.60843e-06
F8VPU2	Farp1	FERM, ARHGEF and pleckstrin domain-containing protein 1	FARP1_MOUSE	-0.259762	0.00332763	0.0101739	7.7018e-05
O35393	Efnb3	Ephrin-B3	EFNB3_MOUSE	-0.802688	0.00333606	0.0101942	6.17371e-05
Q60932	Vdac1	Voltage-dependent anion-selective channel protein 1	VDAC1_MOUSE	0.276965	0.00334768	0.010222	0.00372392
P54254	Atxn1	Ataxin-1	ATX1_MOUSE	2.31028	0.00334875	0.010222	3.2891e-06
Q5SWT3	Slc25a35	Solute carrier family 25 member 35	S2535_MOUSE	1.67402	0.00336679	0.0102716	1.9612e-06
Q8BYM8	Cars2	Probable cysteine--tRNA ligase, mitochondrial	SYCM_MOUSE	0.33172	0.00337041	0.0102771	1.32877e-05
Q6X893	Slc44a1	Choline transporter-like protein 1	CTL1_MOUSE	-0.82655	0.00337302	0.0102796	0.000275336
Q8JZM7	Cdc73	Parafibromin	CDC73_MOUSE	0.764453	0.00339206	0.0103321	3.47891e-06
Q9DBE0	Csad	Cysteine sulfinic acid decarboxylase	CSAD_MOUSE	-0.588987	0.00341291	0.0103871	1.00333e-05
O88737	Bsn	Protein bassoon	BSN_MOUSE	0.987352	0.00341519	0.0103871	0.000206245
Q8CJ19	Mical3	[F-actin]-monooxygenase MICAL3	MICA3_MOUSE	0.326409	0.00341558	0.0103871	4.3138e-05
O54781	Srpk2	SRSF protein kinase 2	SRPK2_MOUSE	0.605823	0.00341981	0.010393	4.45718e-05
Q62407	Speg	Striated muscle-specific serine/threonine-protein kinase	SPEG_MOUSE	1.47651	0.0034232	0.010393	4.59516e-06
Q99JN2	Klhl22	Kelch-like protein 22	KLH22_MOUSE	0.177944	0.00342357	0.010393	1.26693e-05
Q9WVA4	Tagln2	Transgelin-2	TAGL2_MOUSE	-0.894131	0.00342481	0.010393	7.75009e-05
P35803	Gpm6b	Neuronal membrane glycoprotein M6-b	GPM6B_MOUSE	0.692691	0.00342932	0.0103979	0.000591154
Q91VJ2	Cavin3	Caveolae-associated protein 3	CAVN3_MOUSE	-1.41655	0.00343008	0.0103979	1.09252e-05
Q80VP9	Asphd2	Aspartate beta-hydroxylase domain-containing protein 2	ASPH2_MOUSE	0.954917	0.00343852	0.0104179	6.0422e-06
Q9Z2E9	Bscl2	Seipin	BSCL2_MOUSE	-0.627721	0.00344616	0.0104355	1.50443e-05
Q8BU14	Sec62	Translocation protein SEC62	SEC62_MOUSE	-0.398249	0.0034731	0.0105115	3.88991e-05
Q9CQS4	Slc25a46	Solute carrier family 25 member 46	S2546_MOUSE	0.277975	0.00347899	0.0105238	4.53462e-05
Q60963	Pla2g7	Platelet-activating factor acetylhydrolase	PAFA_MOUSE	-1.41138	0.00349237	0.0105586	1.36981e-05
Q9QX11	Cyth1	Cytohesin-1	CYH1_MOUSE	0.413401	0.00350063	0.0105749	8.90878e-06
P55288	Cdh11	Cadherin-11	CAD11_MOUSE	0.617514	0.00350145	0.0105749	1.68147e-05
Q8R1S0	Coq6	Ubiquinone biosynthesis monooxygenase COQ6, mitochondrial	COQ6_MOUSE	0.519779	0.00355268	0.0107239	3.86868e-05
Q9CR51	Atp6v1g1	V-type proton ATPase subunit G 1	VATG1_MOUSE	0.252128	0.00356738	0.0107626	0.000187896
Q08093	Cnn2	Calponin-2	CNN2_MOUSE	-0.844572	0.0035761	0.0107832	1.51473e-05
Q8BKX6	Smg1	Serine/threonine-protein kinase SMG1	SMG1_MOUSE	0.354985	0.00359571	0.0108366	3.11296e-06
Q3V0G7	Garnl3	GTPase-activating Rap/Ran-GAP domain-like protein 3	GARL3_MOUSE	0.620623	0.00363337	0.0109443	7.41452e-06
Q91VI7	Rnh1	Ribonuclease inhibitor	RINI_MOUSE	-0.357968	0.0036478	0.0109819	0.000121267
Q80U19	Daam2	Disheveled-associated activator of morphogenesis 2	DAAM2_MOUSE	-0.539163	0.00366679	0.0110312	2.32636e-05
Q7TNC4	Luc7l2	Putative RNA-binding protein Luc7-like 2	LC7L2_MOUSE	0.301767	0.00366804	0.0110312	2.4668e-05
Q9WTQ8	Timm23	Mitochondrial import inner membrane translocase subunit Tim23	TIM23_MOUSE	-0.498868	0.00367952	0.0110599	2.01462e-05
Q8CFE4	Scyl2	SCY1-like protein 2	SCYL2_MOUSE	0.358731	0.00368364	0.0110664	3.58246e-05
Q61235	Sntb2	Beta-2-syntrophin	SNTB2_MOUSE	-0.46481	0.00368703	0.0110708	4.5711e-06
Q9DB60	Prxl2b	Prostamide/prostaglandin F synthase	PXL2B_MOUSE	-0.278611	0.00369251	0.0110814	5.12532e-05
Q6P2B1	Tnpo3	Transportin-3	TNPO3_MOUSE	0.307539	0.0036991	0.0110954	3.89748e-05
Q9QX47	Son	Protein SON	SON_MOUSE	0.341396	0.00372856	0.0111778	1.81944e-05
P70665	Siae	Sialate O-acetylesterase	SIAE_MOUSE	-0.909553	0.00374743	0.0112285	2.21094e-06
Q9CWZ7	Napg	Gamma-soluble NSF attachment protein	SNAG_MOUSE	0.221703	0.00375785	0.0112538	0.000690177
P09470	Ace	Angiotensin-converting enzyme	ACE_MOUSE	0.503155	0.00376345	0.0112647	1.98864e-05
Q569Z6	Thrap3	Thyroid hormone receptor-associated protein 3	TR150_MOUSE	0.506133	0.00377246	0.0112857	4.09727e-05
Q8K3K8	Optn	Optineurin	OPTN_MOUSE	-1.49819	0.00378267	0.0113085	3.14842e-06
Q8VHN8	Nudt16l1	Tudor-interacting repair regulator protein	TIRR_MOUSE	0.81561	0.00378406	0.0113085	8.40665e-06
Q3UHU5	Mtcl1	Microtubule cross-linking factor 1	MTCL1_MOUSE	2.38797	0.00378881	0.0113168	2.96072e-06
Q8BIF0	Cd99l2	CD99 antigen-like protein 2	C99L2_MOUSE	-0.423806	0.00379119	0.011318	6.74193e-05
Q640R3	Hepacam	Hepatocyte cell adhesion molecule	HECAM_MOUSE	-0.796375	0.00379344	0.0113188	0.000285726
O35887	Calu	Calumenin	CALU_MOUSE	-0.238016	0.0038179	0.0113858	9.60984e-05
Q3UTJ2	Sorbs2	Sorbin and SH3 domain-containing protein 2	SRBS2_MOUSE	-1.29601	0.00382884	0.0114124	8.43452e-05
Q8K4G1	Ltbp4	Latent-transforming growth factor beta-binding protein 4	LTBP4_MOUSE	-1.26976	0.00383941	0.011438	1.60921e-06
Q9D0B6	Pbdc1	Protein PBDC1	PBDC1_MOUSE	-0.378308	0.00385102	0.0114666	3.43703e-05
Q9D024	Ccdc47	Coiled-coil domain-containing protein 47	CCD47_MOUSE	-0.326338	0.00385844	0.0114826	2.47073e-05
Q9Z2A0	Pdpk1	3-phosphoinositide-dependent protein kinase 1	PDPK1_MOUSE	0.386115	0.00386728	0.0114972	7.78721e-05
P48193	Epb41	Protein 4.1	41_MOUSE	0.498182	0.00386738	0.0114972	1.90353e-05
Q80SY5	Prpf38b	Pre-mRNA-splicing factor 38B	PR38B_MOUSE	0.703337	0.00388152	0.0115287	3.97551e-06
Q91VZ6	Smap1	Stromal membrane-associated protein 1	SMAP1_MOUSE	0.438206	0.00388201	0.0115287	0.000164923
Q8R2R9	Ap3m2	AP-3 complex subunit mu-2	AP3M2_MOUSE	0.506482	0.00389287	0.0115523	9.17011e-05
Q80TK0	Kiaa1107	AP2-interacting clathrin-endocytosis protein	K1107_MOUSE	0.763952	0.00389403	0.0115523	2.54284e-05
Q9D1P4	Chordc1	Cysteine and histidine-rich domain-containing protein 1	CHRD1_MOUSE	-0.283327	0.00390524	0.0115796	8.42232e-05
Q8JZZ7	Adgrl2	Adhesion G protein-coupled receptor L2	AGRL2_MOUSE	0.616576	0.00392256	0.0116249	2.66349e-05
P28271	Aco1	Cytoplasmic aconitate hydratase	ACOC_MOUSE	-0.202927	0.00392623	0.0116258	0.000485931
Q3TDK6	Rogdi	Protein rogdi homolog	ROGDI_MOUSE	0.534961	0.00392693	0.0116258	0.000142359
P62806;P62805	H4c1;H4C1	Histone H4	H4_MOUSE;H4_HUMAN	0.609983	0.00393984	0.0116579	0.0025985
Q5NBX1	Cobl	Protein cordon-bleu	COBL_MOUSE	1.87811	0.00395134	0.0116859	1.03075e-06
Q99MR3	Slc12a9	Solute carrier family 12 member 9	S12A9_MOUSE	-0.384118	0.00396124	0.0117091	1.58275e-05
P38647	Hspa9	Stress-70 protein, mitochondrial	GRP75_MOUSE	-0.177739	0.00397462	0.0117426	0.000696295
Q8K3Z9	Pom121	Nuclear envelope pore membrane protein POM 121	PO121_MOUSE	0.706821	0.00398943	0.0117802	1.87809e-06
Q8BGY7	Fam210a	Protein FAM210A	F210A_MOUSE	-0.347952	0.0039938	0.011787	2.46056e-05
O35099	Map3k5	Mitogen-activated protein kinase kinase kinase 5	M3K5_MOUSE	0.919171	0.00400375	0.0118102	5.15587e-06
Q3THG9	Aarsd1	Alanyl-tRNA editing protein Aarsd1	AASD1_MOUSE	-0.341564	0.00402178	0.0118573	6.80963e-05
Q91VF2,Q01984	Hnmt	Histamine N-methyltransferase	HNMT_MOUSE,HNMT_RAT	-0.221063	0.00402638	0.0118621	5.69997e-05
P27659	Rpl3	60S ribosomal protein L3	RL3_MOUSE	0.388214	0.00402759	0.0118621	0.000160832
Q8BH95	Echs1	Enoyl-CoA hydratase, mitochondrial	ECHM_MOUSE	-0.24995	0.00403419	0.0118753	0.000383164
Q6P1B3	Pianp	PILR alpha-associated neural protein	PIANP_MOUSE	1.64366	0.00403621	0.0118753	2.77465e-05
Q60864	Stip1	Stress-induced-phosphoprotein 1	STIP1_MOUSE	-0.243922	0.00404759	0.0119026	0.000802179
Q3TC33	Ccdc127	Coiled-coil domain-containing protein 127	CC127_MOUSE	0.492053	0.00405872	0.0119292	2.93382e-05
A2BDX3	Mocs3	Adenylyltransferase and sulfurtransferase MOCS3	MOCS3_MOUSE	0.586029	0.00406463	0.0119404	0.000210685
Q9Z0E0	Ncdn	Neurochondrin	NCDN_MOUSE	0.460715	0.00406906	0.0119472	0.00069873
O35969	Gamt	Guanidinoacetate N-methyltransferase	GAMT_MOUSE	-0.466762	0.00407483	0.0119527	5.1237e-05
Q91YE8	Synpo2	Synaptopodin-2	SYNP2_MOUSE	1.62345	0.00407511	0.0119527	4.99526e-06
Q3U3E2	Fam117b	Protein FAM117B	F117B_MOUSE	0.385147	0.00408468	0.0119746	2.39691e-06
P83741,Q9JIH7	Wnk1	Serine/threonine-protein kinase WNK1	WNK1_MOUSE,WNK1_RAT	-0.38105	0.00409835	0.0120077	4.76767e-05
Q08091	Cnn1	Calponin-1	CNN1_MOUSE	-1.67165	0.00410017	0.0120077	5.85546e-05
Q9R1L5	Mast1	Microtubule-associated serine/threonine-protein kinase 1	MAST1_MOUSE	-0.348157	0.0041084	0.0120256	1.43168e-05
Q9CZN7	Shmt2	Serine hydroxymethyltransferase, mitochondrial	GLYM_MOUSE	-0.315371	0.00412331	0.012063	3.2813e-05
Q6PDQ2	Chd4	Chromodomain-helicase-DNA-binding protein 4	CHD4_MOUSE	0.494205	0.0041346	0.0120898	1.65192e-05
Q00558	F8a1	40-kDa huntingtin-associated protein	HAP40_MOUSE	0.146092	0.00414914	0.0121261	2.98758e-05
Q6QWF9	Camk2n1	Calcium/calmodulin-dependent protein kinase II inhibitor 1	CK2N1_MOUSE	1.52749	0.00415476	0.0121363	1.85628e-05
Q00899	Yy1	Transcriptional repressor protein YY1	TYY1_MOUSE	0.835764	0.00415771	0.0121387	2.53022e-06
Q80XC2	Trmt61a	tRNA (adenine(58)-N(1))-methyltransferase catalytic subunit TRMT61A	TRM61_MOUSE	0.955303	0.00416275	0.0121472	6.94933e-06
Q8VDC0	Lars2	Probable leucine--tRNA ligase, mitochondrial	SYLM_MOUSE	0.596469	0.00418163	0.0121961	2.33542e-05
Q9D328	Tmem35a	Transmembrane protein 35A	TM35A_MOUSE	0.266062	0.00418497	0.0121996	8.15636e-05
P36916	Gnl1	Guanine nucleotide-binding protein-like 1	GNL1_MOUSE	0.25693	0.00419131	0.0122118	0.000114141
P62748	Hpcal1	Hippocalcin-like protein 1	HPCL1_MOUSE	-0.279728	0.00419397	0.0122123	0.000269252
Q8R0S2	Iqsec1	IQ motif and SEC7 domain-containing protein 1	IQEC1_MOUSE	0.263218	0.00419575	0.0122123	0.000159325
Q99PL5	Rrbp1	Ribosome-binding protein 1	RRBP1_MOUSE	-0.739526	0.00419857	0.0122142	2.81858e-05
Q64737	Gart	Trifunctional purine biosynthetic protein adenosine-3	PUR2_MOUSE	-0.0938383	0.00420128	0.0122159	8.84e-05
Q8VD37	Sgip1	SH3-containing GRB2-like protein 3-interacting protein 1	SGIP1_MOUSE	0.551289	0.00420871	0.0122312	0.000243929
Q08331	Calb2	Calretinin	CALB2_MOUSE	-0.985006	0.00421521	0.0122439	0.000358536
Q99J77	Nans	Sialic acid synthase	SIAS_MOUSE	-0.228633	0.00423736	0.0122977	5.71487e-05
Q8VC69	Slc22a6	Solute carrier family 22 member 6	S22A6_MOUSE	-5.33882	0.00423806	0.0122977	9.14828e-07
Q9CRA9	Fgfr1op2	FGFR1 oncogene partner 2 homolog	FGOP2_MOUSE	-0.60476	0.00424108	0.0123002	6.97518e-05
Q9JKR6,Q63617	Hyou1	Hypoxia up-regulated protein 1	HYOU1_MOUSE,HYOU1_RAT	0.255291	0.00424446	0.0123037	0.000125691
P54731	Faf1	FAS-associated factor 1	FAF1_MOUSE	-0.578632	0.00425294	0.0123187	9.42121e-06
Q6KC51,Q8BL65	Ablim2	Actin-binding LIM protein 2	ABLM2_RAT,ABLM2_MOUSE	0.877084	0.00425394	0.0123187	9.3605e-05
Q91W39	Ncoa5	Nuclear receptor coactivator 5	NCOA5_MOUSE	1.25361	0.00425651	0.0123199	2.02477e-05
Q6P9Q6	Fkbp15	FK506-binding protein 15	FKB15_MOUSE	-0.628985	0.00426194	0.0123293	1.63258e-05
O70176	Adcyap1	Pituitary adenylate cyclase-activating polypeptide	PACA_MOUSE	-1.04923	0.00428529	0.0123906	1.59895e-05
P16283	Slc4a3	Anion exchange protein 3	B3A3_MOUSE	-0.479327	0.00428752	0.0123908	6.01241e-05
Q8R3Q2	Ppp6r2	Serine/threonine-protein phosphatase 6 regulatory subunit 2	PP6R2_MOUSE	0.295512	0.00430021	0.0124185	2.91296e-05
Q8K4F5	Abhd11	Protein ABHD11	ABHDB_MOUSE	-0.389734	0.00430146	0.0124185	3.06485e-05
Q9Z1Q9	Vars	Valine--tRNA ligase	SYVC_MOUSE	-0.360873	0.00432755	0.0124874	6.81975e-05
P97785	Gfra1	GDNF family receptor alpha-1	GFRA1_MOUSE	-0.930875	0.00433248	0.0124953	2.97083e-05
P15105	Glul	Glutamine synthetase	GLNA_MOUSE	-0.453903	0.00433533	0.0124972	0.00214597
P30681	Hmgb2	High mobility group protein B2	HMGB2_MOUSE	0.396459	0.00434327	0.0125138	2.06965e-05
Q8VDI7	Ubac1	Ubiquitin-associated domain-containing protein 1	UBAC1_MOUSE	-0.223803	0.00435013	0.0125252	1.31172e-05
O35075	Vps26c	Vacuolar protein sorting-associated protein 26C	VP26C_MOUSE	-0.199022	0.00435162	0.0125252	9.26357e-06
Q6PGC1	Dhx29	ATP-dependent RNA helicase DHX29	DHX29_MOUSE	0.436074	0.00436684	0.0125627	5.49362e-06
P80316	Cct5	T-complex protein 1 subunit epsilon	TCPE_MOUSE	-0.0775149	0.00437757	0.0125872	0.000198395
P59017	Bcl2l13	Bcl-2-like protein 13	B2L13_MOUSE	0.513688	0.0043867	0.0125943	7.10391e-05
Q8VDC1	Fyco1	FYVE and coiled-coil domain-containing protein 1	FYCO1_MOUSE	-1.16073	0.00438789	0.0125943	1.08977e-06
P08122	Col4a2	Collagen alpha-2(IV) chain	CO4A2_MOUSE	-0.952338	0.00438809	0.0125943	0.000128499
Q8CH72	Trim32	E3 ubiquitin-protein ligase TRIM32	TRI32_MOUSE	0.158001	0.00438894	0.0125943	2.80816e-05
Q8BHE8	Maip1	m-AAA protease-interacting protein 1, mitochondrial	MAIP1_MOUSE	0.300695	0.0043911	0.0125943	3.25791e-05
Q9QZB1	Rgs20	Regulator of G-protein signaling 20	RGS20_MOUSE	0.367557	0.00439969	0.0126087	6.99243e-05
Q80WT0	Jph4	Junctophilin-4	JPH4_MOUSE	0.89512	0.00440056	0.0126087	1.4213e-05
Q3UVC0	Ksr2	Kinase suppressor of Ras 2	KSR2_MOUSE	0.867552	0.00442085	0.0126605	8.11169e-06
Q8VD62	Bles03	UPF0696 protein C11orf68 homolog	CK068_MOUSE	-0.202043	0.00443124	0.0126839	4.44308e-05
Q99P58	Rab27b	Ras-related protein Rab-27B	RB27B_MOUSE	-0.521257	0.00443845	0.0126981	6.0013e-05
P13707	Gpd1	Glycerol-3-phosphate dehydrogenase [NAD(+)], cytoplasmic	GPDA_MOUSE	-0.607419	0.00445229	0.0127314	0.000356919
P62918	Rpl8	60S ribosomal protein L8	RL8_MOUSE	0.632379	0.00446513	0.0127617	0.000142008
Q8BZA7	Gpr26	G-protein coupled receptor 26	GPR26_MOUSE	1.87358	0.00446963	0.0127681	3.52618e-06
Q9CY50	Ssr1	Translocon-associated protein subunit alpha	SSRA_MOUSE	-0.288663	0.00447537	0.0127747	6.61189e-05
Q9Z2W0	Dnpep	Aspartyl aminopeptidase	DNPEP_MOUSE	0.371502	0.00447641	0.0127747	0.000134972
P19157	Gstp1	Glutathione S-transferase P 1	GSTP1_MOUSE	-0.323425	0.00449106	0.0128101	0.000687675
A8Y5H7	Sec14l1	SEC14-like protein 1	S14L1_MOUSE	1.17593	0.0045005	0.0128306	6.31707e-06
[truncated: 3,700 more rows]

## Sheet: Bulk_Acute_v_Rest
ProteinAccessions	Genes	ProteinDescriptions	ProteinNames	Log2FC	pvalue	qvalue	Expr
Q9R257	Hebp1	Heme-binding protein 1	HEBP1_MOUSE	0.852903	5.28737e-05	0.160731	0.000769133
Q9EPL2	Clstn1	Calsyntenin-1	CSTN1_MOUSE	-0.676293	5.64109e-05	0.160731	2.9587e-05
Q8CAL5	Gpc5	Glypican-5	GPC5_MOUSE	-0.851866	8.461e-05	0.160731	5.32092e-06
Q99NH2,Q9Z340	Pard3	Partitioning defective 3 homolog	PARD3_MOUSE,PARD3_RAT	-0.627426	0.000113555	0.161787	3.87497e-06
P21460	Cst3	Cystatin-C	CYTC_MOUSE	-0.927353	0.000156439	0.178309	0.00012446
Q9JJG0	Tacc2	Transforming acidic coiled-coil-containing protein 2	TACC2_MOUSE	-0.173596	0.000306942	0.275624	7.40792e-06
P08226	Apoe	Apolipoprotein E	APOE_MOUSE	-1.08559	0.000338545	0.275624	0.000408999
Q9R061	Nubp2	Cytosolic Fe-S cluster assembly factor NUBP2	NUBP2_MOUSE	-0.368235	0.000638061	0.407148	7.57113e-06
Q8BP22	Fam92a	Protein FAM92A	FA92A_MOUSE	-1.145	0.000642978	0.407148	2.89809e-06
F2Z472	Svs3a	Seminal vesicle secretory protein 3A	SVS3A_MOUSE	2.35795	0.000815685	0.410831	2.72702e-06
P27546	Map4	Microtubule-associated protein 4	MAP4_MOUSE	-1.10908	0.000857652	0.410831	0.000168872
Q6ZQ58	Larp1	La-related protein 1	LARP1_MOUSE	-0.578914	0.000906831	0.410831	4.07415e-05
Q8VHV1	Baalc	Brain and acute leukemia cytoplasmic protein	BAALC_MOUSE	-0.650527	0.000937149	0.410831	2.42869e-06
Q9CXX9	Cuedc2	CUE domain-containing protein 2	CUED2_MOUSE	-0.437764	0.00112028	0.432245	1.70363e-05
D3YZU1	Shank1	SH3 and multiple ankyrin repeat domains protein 1	SHAN1_MOUSE	-0.255455	0.00113769	0.432245	1.86896e-05
Q78WH7	Camk2n2	Calcium/calmodulin-dependent protein kinase II inhibitor 2	CK2N2_MOUSE	-0.696814	0.0014127	0.472933	1.53168e-05
P63166	Sumo1	Small ubiquitin-related modifier 1	SUMO1_MOUSE	-0.477087	0.0014168	0.472933	1.25958e-05
Q3UHD6	Snx27	Sorting nexin-27	SNX27_MOUSE	-0.257298	0.00151014	0.472933	8.38239e-05
O08992	Sdcbp	Syntenin-1	SDCB1_MOUSE	-0.409827	0.00157881	0.472933	4.23427e-05
Q8VCN9	Tbcc	Tubulin-specific chaperone C	TBCC_MOUSE	-0.218147	0.00165971	0.472933	4.27865e-05
P07724	Alb	Serum albumin	ALBU_MOUSE	-2.32247	0.00193045	0.493996	7.38446e-05
Q9CR67	Tmem33	Transmembrane protein 33	TMM33_MOUSE	0.101176	0.00193093	0.493996	4.41059e-05
Q9ESJ4	Nckipsd	NCK-interacting protein with SH3 domain	SPN90_MOUSE	-0.0955355	0.00199367	0.493996	8.33984e-05
Q9CR29	Ccdc43	Coiled-coil domain-containing protein 43	CCD43_MOUSE	-0.437233	0.00228883	0.506364	9.68804e-06
Q8CHS8	Vps37a	Vacuolar protein sorting-associated protein 37A	VP37A_MOUSE	-0.145081	0.00232714	0.506364	9.15017e-06
Q9D706	Rpap3	RNA polymerase II-associated protein 3	RPAP3_MOUSE	-0.556419	0.00238374	0.506364	6.28806e-06
B0F2B4	Nlgn4l	Neuroligin 4-like	NLGN4_MOUSE	-0.584432	0.00267767	0.506364	1.60432e-05
P97783	Mllt11	Protein AF1q	AF1Q_MOUSE	-1.45524	0.00296671	0.506364	2.94283e-06
Q3U5Q7	Cmpk2	UMP-CMP kinase 2, mitochondrial	CMPK2_MOUSE	0.0926471	0.0030621	0.506364	7.21676e-05
Q8CAY6	Acat2	Acetyl-CoA acetyltransferase, cytosolic	THIC_MOUSE	0.579637	0.00308933	0.506364	0.000284043
Q9CPP6	Ndufa5	NADH dehydrogenase [ubiquinone] 1 alpha subcomplex subunit 5	NDUA5_MOUSE	0.249676	0.00311054	0.506364	0.000314673
P07758;P22599;Q00896	Serpina1a;Serpina1b;Serpina1c	Alpha-1-antitrypsin 1-1;Alpha-1-antitrypsin 1-2;Alpha-1-antitrypsin 1-3	A1AT1_MOUSE;A1AT2_MOUSE;A1AT3_MOUSE	-1.86761	0.00312574	0.506364	3.9297e-06
P97798	Neo1	Neogenin	NEO1_MOUSE	-0.498161	0.00314274	0.506364	2.38718e-05
Q8C5P7	Tdrp	Testis development-related protein	TDRP_MOUSE	-0.540802	0.0031889	0.506364	1.4674e-05
P14869	Rplp0	60S acidic ribosomal protein P0	RLA0_MOUSE	-0.256812	0.00319569	0.506364	0.000194486
P29621;Q80X76;Q5I2A0;P07759;Q03734;Q91WP6	Serpina3c;Serpina3f;Serpina3g;Serpina3k;Serpina3m;Serpina3n	Serine protease inhibitor A3C;Serine protease inhibitor A3F;Serine protease inhibitor A3G;Serine protease inhibitor A3K;Serine protease inhibitor A3M;Serine protease inhibitor A3N	SPA3C_MOUSE;SPA3F_MOUSE;SPA3G_MOUSE;SPA3K_MOUSE;SPA3M_MOUSE;SPA3N_MOUSE	-2.6479	0.00319865	0.506364	2.69109e-06
P59326	Ythdf1	YTH domain-containing family protein 1	YTHD1_MOUSE	-0.981861	0.00344	0.522226	8.23817e-06
Q149F3	Gspt2	Eukaryotic peptide chain release factor GTP-binding subunit ERF3B	ERF3B_MOUSE	-0.287465	0.00350526	0.522226	1.4293e-05
Q8K2H2	Otud6b	Deubiquitinase OTUD6B	OTU6B_MOUSE	-1.0619	0.00357376	0.522226	1.30608e-05
O88196	Ttc3	E3 ubiquitin-protein ligase TTC3	TTC3_MOUSE	-0.58992	0.00397814	0.522747	7.23506e-06
Q9JII5	Dazap1	DAZ-associated protein 1	DAZP1_MOUSE	-0.338534	0.00399572	0.522747	4.71843e-05
Q8VDJ3	Hdlbp	Vigilin	VIGLN_MOUSE	-0.386137	0.00401865	0.522747	3.23706e-05
Q922B2	Dars	Aspartate--tRNA ligase, cytoplasmic	SYDC_MOUSE	0.658801	0.00417327	0.522747	0.000201496
O35226	Psmd4	26S proteasome non-ATPase regulatory subunit 4	PSMD4_MOUSE	-0.338854	0.00419251	0.522747	9.73479e-05
O35988	Sdc4	Syndecan-4	SDC4_MOUSE	-0.99163	0.00427082	0.522747	1.23968e-05
Q80XK6	Atg2b	Autophagy-related protein 2 homolog B	ATG2B_MOUSE	-0.187071	0.00433454	0.522747	2.12777e-05
Q9CXU9	Eif1b	Eukaryotic translation initiation factor 1b	EIF1B_MOUSE	-0.280733	0.00437493	0.522747	7.45548e-05
Q9R0Q3	Tmed2	Transmembrane emp24 domain-containing protein 2	TMED2_MOUSE	0.575192	0.00441792	0.522747	3.04369e-05
Q8BLK9	Rps6kc1	Ribosomal protein S6 kinase delta-1	KS6C1_MOUSE	-0.213215	0.00458996	0.522747	4.43024e-06
Q8BHL8	Psmf1	Proteasome inhibitor PI31 subunit	PSMF1_MOUSE	-0.422611	0.00470295	0.522747	2.69435e-05
Q8K1E0	Stx5	Syntaxin-5	STX5_MOUSE	-0.534005	0.00476592	0.522747	9.6495e-06
P70232	Chl1	Neural cell adhesion molecule L1-like protein	NCHL1_MOUSE	-0.684367	0.00484088	0.522747	2.9056e-05
Q8CJ40	Crocc	Rootletin	CROCC_MOUSE	-0.39871	0.0049258	0.522747	5.55428e-05
Q06890	Clu	Clusterin	CLUS_MOUSE	-0.266503	0.00502365	0.522747	0.000121939
Q7TPM1	Prrc2b	Protein PRRC2B	PRC2B_MOUSE	-0.643524	0.00513327	0.522747	2.02334e-06
Q9QYF1	Rdh11	Retinol dehydrogenase 11	RDH11_MOUSE	0.188279	0.00520468	0.522747	1.91675e-05
P21661	Pcsk2	Neuroendocrine convertase 2	NEC2_MOUSE	-0.216473	0.00541167	0.522747	2.42103e-05
Q6P8I4	Pcnp	PEST proteolytic signal-containing nuclear protein	PCNP_MOUSE	-0.600143	0.00550272	0.522747	2.82448e-05
Q6NZJ6	Eif4g1	Eukaryotic translation initiation factor 4 gamma 1	IF4G1_MOUSE	-0.242687	0.00552082	0.522747	4.21679e-05
Q9CZW4	Acsl3	Long-chain-fatty-acid--CoA ligase 3	ACSL3_MOUSE	0.104624	0.00557739	0.522747	6.72765e-05
Q8BUL6	Plekha1	Pleckstrin homology domain-containing family A member 1	PKHA1_MOUSE	-0.402918	0.00559529	0.522747	9.0635e-06
Q3UY34	Custos	Protein CUSTOS	CSTOS_MOUSE	-1.15293	0.00583419	0.52642	3.3893e-06
P23591	Tsta3	GDP-L-fucose synthase	FCL_MOUSE	-0.207672	0.00583521	0.52642	2.95464e-05
P0DP26;P0DP27;P0DP28	Calm1;Calm2;Calm3	Calmodulin-1;Calmodulin-2;Calmodulin-3	CALM1_MOUSE;CALM2_MOUSE;CALM3_MOUSE	-0.677627	0.00591171	0.52642	0.0050088
Q60900	Elavl3	ELAV-like protein 3	ELAV3_MOUSE	-0.137795	0.00617416	0.538714	8.01519e-05
Q9CQQ8	Lsm7	U6 snRNA-associated Sm-like protein LSm7	LSM7_MOUSE	-0.378883	0.00623883	0.538714	2.42848e-05
Q812E0	Cpeb2	Cytoplasmic polyadenylation element-binding protein 2	CPEB2_MOUSE	-0.834453	0.00645399	0.543438	5.58146e-06
P55821	Stmn2	Stathmin-2	STMN2_MOUSE	-0.170984	0.00651586	0.543438	4.24556e-05
Q9CRY7	Gdpd1	Lysophospholipase D GDPD1	GDPD1_MOUSE	0.171521	0.00658767	0.543438	0.000119504
Q921L3	Tmco1	Calcium load-activated calcium channel	TMCO1_MOUSE	0.380036	0.00675457	0.543438	3.69964e-05
Q8VE11	Mtmr6	Myotubularin-related protein 6	MTMR6_MOUSE	-0.392939	0.00677033	0.543438	7.75402e-06
Q99JP7	Ggt7	Glutathione hydrolase 7	GGT7_MOUSE	0.194565	0.00704418	0.557566	0.000128632
O88602	Cacng2	Voltage-dependent calcium channel gamma-2 subunit	CCG2_MOUSE	-0.389162	0.00734274	0.562841	3.39896e-05
Q62095	Ddx3y	ATP-dependent RNA helicase DDX3Y	DDX3Y_MOUSE	-0.70473	0.00745667	0.562841	5.65756e-06
A2ARP1	Ppip5k1	Inositol hexakisphosphate and diphosphoinositol-pentakisphosphate kinase 1	VIP1_MOUSE	-0.284654	0.00762285	0.562841	9.63152e-06
Q9DCH4	Eif3f	Eukaryotic translation initiation factor 3 subunit F	EIF3F_MOUSE	-0.244803	0.00767499	0.562841	6.09312e-05
Q9QXV8	Spry2	Protein sprouty homolog 2	SPY2_MOUSE	-0.776248	0.0077888	0.562841	3.44225e-06
Q8BJ05	Zc3h14	Zinc finger CCCH domain-containing protein 14	ZC3HE_MOUSE	-0.749901	0.00783178	0.562841	3.26099e-06
Q9D6U8	Fam162a	Protein FAM162A	F162A_MOUSE	0.0795943	0.00791386	0.562841	0.000176585
Q8CHT0	Aldh4a1	Delta-1-pyrroline-5-carboxylate dehydrogenase, mitochondrial	AL4A1_MOUSE	0.195536	0.00800066	0.562841	0.000127103
P97855	G3bp1	Ras GTPase-activating protein-binding protein 1	G3BP1_MOUSE	-0.251346	0.0080036	0.562841	1.5225e-05
Q8BHL3	Tbc1d10b	TBC1 domain family member 10B	TB10B_MOUSE	-0.393688	0.00809843	0.562841	7.05475e-05
Q03157	Aplp1	Amyloid-like protein 1	APLP1_MOUSE	-0.934889	0.00829201	0.566592	4.55549e-05
Q9CT10	Ranbp3	Ran-binding protein 3	RANB3_MOUSE	-0.807919	0.00843229	0.566592	1.34974e-05
Q6ZWX6	Eif2s1	Eukaryotic translation initiation factor 2 subunit 1	IF2A_MOUSE	-0.121502	0.00845623	0.566592	9.64257e-05
Q8BN59	Larp6	La-related protein 6	LARP6_MOUSE	-0.190487	0.00855009	0.566592	1.13137e-05
Q99K28	Arfgap2	ADP-ribosylation factor GTPase-activating protein 2	ARFG2_MOUSE	-0.44498	0.00875801	0.572487	2.5647e-05
P56394	Cox17	Cytochrome c oxidase copper chaperone	COX17_MOUSE	0.120863	0.00893354	0.572487	2.77855e-05
P04627	Araf	Serine/threonine-protein kinase A-Raf	ARAF_MOUSE	-0.238438	0.00894041	0.572487	6.96361e-05
Q99KL7	Rab28	Ras-related protein Rab-28	RAB28_MOUSE	-0.334352	0.00926202	0.57374	2.78064e-06
Q99KV1	Dnajb11	DnaJ homolog subfamily B member 11	DJB11_MOUSE	0.141091	0.00940182	0.57374	4.96919e-05
Q9JK42	Pdk2	[Pyruvate dehydrogenase (acetyl-transferring)] kinase isozyme 2, mitochondrial	PDK2_MOUSE	0.302373	0.00950126	0.57374	9.02987e-05
Q08122	Tle3	Transducin-like enhancer protein 3	TLE3_MOUSE	-0.516291	0.00958447	0.57374	3.7936e-06
Q61194	Pik3c2a	Phosphatidylinositol 4-phosphate 3-kinase C2 domain-containing subunit alpha	P3C2A_MOUSE	-0.323866	0.00963101	0.57374	1.79684e-06
Q8BGH4	Reep1	Receptor expression-enhancing protein 1	REEP1_MOUSE	-0.289956	0.00970214	0.57374	4.98117e-05
Q9D880	Timm50	Mitochondrial import inner membrane translocase subunit TIM50	TIM50_MOUSE	0.0817546	0.00980948	0.57374	5.19752e-05
Q9JL56	Gde1	Glycerophosphodiester phosphodiesterase 1	GDE1_MOUSE	0.12911	0.00984066	0.57374	7.89337e-05
Q60865	Caprin1	Caprin-1	CAPR1_MOUSE	-0.382438	0.00986602	0.57374	6.82793e-05
Q7TN29	Smap2	Stromal membrane-associated protein 2	SMAP2_MOUSE	-0.19823	0.0100815	0.580345	0.000113634
Q62288	Spock1	Testican-1	TICN1_MOUSE	-0.299545	0.0102472	0.581314	1.5519e-05
Q8R0X7	Sgpl1	Sphingosine-1-phosphate lyase 1	SGPL1_MOUSE	0.380748	0.0103023	0.581314	3.05339e-06
Q68FM6	Elfn2	Protein phosphatase 1 regulatory subunit 29	PPR29_MOUSE	-0.793497	0.0104956	0.582626	3.62945e-05
Q80YR4	Znf598	E3 ubiquitin-protein ligase ZNF598	ZN598_MOUSE	-1.1258	0.0106802	0.582626	3.3765e-06
Q8K2F8	Lsm14a	Protein LSM14 homolog A	LS14A_MOUSE	-0.723535	0.0106806	0.582626	1.66997e-05
P20357	Map2	Microtubule-associated protein 2	MTAP2_MOUSE	-0.51549	0.0107345	0.582626	0.000493341
Q9CQ91	Ndufa3	NADH dehydrogenase [ubiquinone] 1 alpha subcomplex subunit 3	NDUA3_MOUSE	0.129959	0.0111456	0.597787	0.000269938
P62827	Ran	GTP-binding nuclear protein Ran	RAN_MOUSE	-0.152388	0.011257	0.597787	0.000673356
Q9WUA2	Farsb	Phenylalanine--tRNA ligase beta subunit	SYFB_MOUSE	-0.176908	0.0113285	0.597787	6.33563e-05
Q62179	Sema4b	Semaphorin-4B	SEM4B_MOUSE	-0.433611	0.011537	0.603205	7.36975e-06
Q9DCS2	Mettl26	Methyltransferase-like 26	MTL26_MOUSE	0.329105	0.0118177	0.612264	4.72232e-05
Q9CZ00	Dbndd1	Dysbindin domain-containing protein 1	DBND1_MOUSE	-0.459	0.012047	0.612654	7.99998e-06
P99026	Psmb4	Proteasome subunit beta type-4	PSB4_MOUSE	-0.260356	0.0120635	0.612654	0.00012513
Q9JIF7	Copb1	Coatomer subunit beta	COPB_MOUSE	-0.127611	0.0121477	0.612654	9.40282e-05
P20108	Prdx3	Thioredoxin-dependent peroxide reductase, mitochondrial	PRDX3_MOUSE	0.442036	0.012292	0.614491	0.000714238
Q9D2V5	Aar2	Protein AAR2 homolog	AAR2_MOUSE	-0.373145	0.0124483	0.616893	5.64384e-06
Q3UEB3	Puf60	Poly(U)-binding-splicing factor PUF60	PUF60_MOUSE	-0.294514	0.0126259	0.61965	5.85817e-05
Q80WT5	Aftph	Aftiphilin	AFTIN_MOUSE	-0.372019	0.0127895	0.61965	1.10777e-05
P63030	Mpc1	Mitochondrial pyruvate carrier 1	MPC1_MOUSE	0.509196	0.0128828	0.61965	7.31671e-05
Q9D2N4	Dtna	Dystrobrevin alpha	DTNA_MOUSE	-0.263558	0.0129388	0.61965	5.3015e-05
P60824	Cirbp	Cold-inducible RNA-binding protein	CIRBP_MOUSE	-0.317002	0.0130872	0.621533	8.1539e-05
Q8JZQ9	Eif3b	Eukaryotic translation initiation factor 3 subunit B	EIF3B_MOUSE	-0.280849	0.013505	0.632591	4.18826e-05
P49442	Inpp1	Inositol polyphosphate 1-phosphatase	INPP_MOUSE	-0.139119	0.013542	0.632591	9.51549e-05
Q80U04	Pja2	E3 ubiquitin-protein ligase Praja-2	PJA2_MOUSE	-0.633919	0.0137851	0.633537	5.58236e-06
Q8R0H9	Gga1	ADP-ribosylation factor-binding protein GGA1	GGA1_MOUSE	-0.159059	0.0140468	0.633537	5.46009e-05
O55013	Trappc3	Trafficking protein particle complex subunit 3	TPPC3_MOUSE	0.210565	0.0141044	0.633537	0.000148591
Q61024	Asns	Asparagine synthetase [glutamine-hydrolyzing]	ASNS_MOUSE	-0.236834	0.0141172	0.633537	3.96325e-05
Q91W52	Tmem19	Transmembrane protein 19	TMM19_MOUSE	0.290043	0.0141181	0.633537	2.09429e-05
P60843	Eif4a1	Eukaryotic initiation factor 4A-I	IF4A1_MOUSE	-0.36234	0.0144777	0.644596	0.000314919
P07309	Ttr	Transthyretin	TTHY_MOUSE	-1.70637	0.0149918	0.662312	9.80328e-06
P70211	Dcc	Netrin receptor DCC	DCC_MOUSE	-0.655713	0.0155182	0.67898	1.12434e-05
Q9WVR4	Fxr2	Fragile X mental retardation syndrome-related protein 2	FXR2_MOUSE	-0.274102	0.0157107	0.67898	3.41262e-05
Q8R3E3	Wipi1	WD repeat domain phosphoinositide-interacting protein 1	WIPI1_MOUSE	-0.701622	0.0157265	0.67898	5.94592e-06
Q6PEE3	Rrm2b	Ribonucleoside-diphosphate reductase subunit M2 B	RIR2B_MOUSE	-0.277827	0.0159438	0.679093	8.42632e-06
Q64362	Aktip	AKT-interacting protein	AKTIP_MOUSE	-0.40038	0.0159674	0.679093	5.92155e-06
Q7TMF3	Ndufa12	NADH dehydrogenase [ubiquinone] 1 alpha subcomplex subunit 12	NDUAC_MOUSE	0.175767	0.0165347	0.685854	0.000250486
Q9ESK9	Rb1cc1	RB1-inducible coiled-coil protein 1	RBCC1_MOUSE	-0.447785	0.0165867	0.685854	4.58716e-06
P55096	Abcd3	ATP-binding cassette sub-family D member 3	ABCD3_MOUSE	0.113168	0.0166992	0.685854	3.61769e-05
O54692	Zw10	Centromere/kinetochore protein zw10 homolog	ZW10_MOUSE	-0.140221	0.0167228	0.685854	8.76714e-06
Q61220	Nell2	Protein kinase C-binding protein NELL2	NELL2_MOUSE	-1.29657	0.0167282	0.685854	6.9297e-06
Q9QZI8	Serinc1	Serine incorporator 1	SERC1_MOUSE	0.698952	0.0170791	0.695242	1.14692e-05
Q6NXN1	Szrd1	SUZ domain-containing protein 1	SZRD1_MOUSE	-0.554551	0.0172275	0.696308	4.96955e-06
Q9QY36	Naa10	N-alpha-acetyltransferase 10	NAA10_MOUSE	-0.254532	0.0174243	0.699302	2.19444e-05
P63054	Pcp4	Calmodulin regulator protein PCP4	PCP4_MOUSE	-1.09544	0.0175847	0.700806	0.00153123
Q61081	Cdc37	Hsp90 co-chaperone Cdc37	CDC37_MOUSE	-0.168099	0.0179116	0.704651	0.000160454
Q91YT7;Q9Y5A9	Ythdf2;YTHDF2	YTH domain-containing family protein 2	YTHD2_MOUSE;YTHD2_HUMAN	-0.391468	0.0181339	0.704651	1.11148e-05
Q69Z99	Znf512	Zinc finger protein 512	ZN512_MOUSE	0.166359	0.0181588	0.704651	1.29748e-05
Q501J7	Phactr4	Phosphatase and actin regulator 4	PHAR4_MOUSE	-2.5216	0.0182095	0.704651	1.97033e-06
Q91V81	Rbm42	RNA-binding protein 42	RBM42_MOUSE	-0.598788	0.0182994	0.704651	3.57621e-06
P50586	Tub	Tubby protein	TUB_MOUSE	-0.405707	0.0185991	0.711384	6.41401e-06
Q8BKC8	Pi4kb	Phosphatidylinositol 4-kinase beta	PI4KB_MOUSE	-0.311454	0.018769	0.71204	7.01192e-06
Q3TJZ6	Fam98a	Protein FAM98A	FA98A_MOUSE	-0.417443	0.0188674	0.71204	3.08599e-05
Q6ZQ73	Cand2	Cullin-associated NEDD8-dissociated protein 2	CAND2_MOUSE	-2.55093	0.0189925	0.71204	8.32881e-07
Q5SV85	Synrg	Synergin gamma	SYNRG_MOUSE	-0.608663	0.0191495	0.71204	3.82753e-05
Q62077	Plcg1	1-phosphatidylinositol 4,5-bisphosphate phosphodiesterase gamma-1	PLCG1_MOUSE	-0.0927779	0.0192925	0.71204	3.57366e-05
Q3UVG3	Fam91a1	Protein FAM91A1	F91A1_MOUSE	-0.111791	0.0195372	0.71204	1.0078e-05
Q8BUK6	Hook3	Protein Hook homolog 3	HOOK3_MOUSE	-0.157032	0.0200459	0.71204	3.80693e-05
Q99MR1	Gigyf1	GRB10-interacting GYF protein 1	GGYF1_MOUSE	-0.536402	0.0200855	0.71204	3.30787e-06
Q9Z0V8	Timm17a	Mitochondrial import inner membrane translocase subunit Tim17-A	TI17A_MOUSE	-2.27954	0.0201816	0.71204	4.23847e-07
P58871	Tnks1bp1	182 kDa tankyrase-1-binding protein	TB182_MOUSE	-0.418098	0.0203088	0.71204	1.34611e-05
Q9CZ62	Cep97	Centrosomal protein of 97 kDa	CEP97_MOUSE	-0.488138	0.0203723	0.71204	2.25776e-06
Q8C0L9	Gpcpd1	Glycerophosphocholine phosphodiesterase GPCPD1	GPCP1_MOUSE	-0.214199	0.0204012	0.71204	2.25315e-05
Q5XG69	Fam169a	Soluble lamin-associated protein of 75 kDa	F169A_MOUSE	-0.223462	0.0204155	0.71204	3.40622e-05
Q8VE92	Rbm4b	RNA-binding protein 4B	RBM4B_MOUSE	-0.40218	0.0205118	0.71204	2.37639e-06
P30275	Ckmt1	Creatine kinase U-type, mitochondrial	KCRU_MOUSE	0.307623	0.0206144	0.71204	0.00246674
P70445	Eif4ebp2	Eukaryotic translation initiation factor 4E-binding protein 2	4EBP2_MOUSE	-0.494551	0.0206153	0.71204	1.95672e-05
Q91W86	Vps11	Vacuolar protein sorting-associated protein 11 homolog	VPS11_MOUSE	-0.148079	0.0210927	0.723216	3.82332e-05
Q8R2Y8	Ptrh2	Peptidyl-tRNA hydrolase 2, mitochondrial	PTH2_MOUSE	0.0905241	0.0211927	0.723216	4.59884e-05
Q62178	Sema4a	Semaphorin-4A	SEM4A_MOUSE	0.191373	0.0216635	0.7339	1.976e-05
Q922Y1	Ubxn1	UBX domain-containing protein 1	UBXN1_MOUSE	-0.19441	0.021887	0.7339	3.33217e-05
Q8K2L8	Trappc12	Trafficking protein particle complex subunit 12	TPC12_MOUSE	-0.258879	0.0219812	0.7339	2.6597e-05
Q6PDX6	Rnf220	E3 ubiquitin-protein ligase Rnf220	RN220_MOUSE	-0.367549	0.022101	0.7339	4.09465e-06
P97825	Jpt1	Jupiter microtubule associated homolog 1	JUPI1_MOUSE	-0.5309	0.0223539	0.7339	5.95356e-05
P46061	Rangap1	Ran GTPase-activating protein 1	RAGP1_MOUSE	-0.238663	0.0223789	0.7339	4.22096e-05
O35954	Pitpnm1	Membrane-associated phosphatidylinositol transfer protein 1	PITM1_MOUSE	-0.284666	0.0224072	0.7339	8.74146e-05
Q6PIP5	Nudcd1	NudC domain-containing protein 1	NUDC1_MOUSE	-0.368758	0.0227661	0.738124	1.08765e-05
P19258	Mpv17	Protein Mpv17	MPV17_MOUSE	0.239059	0.0230374	0.738124	1.16763e-05
Q8CCF0	Prpf31	U4/U6 small nuclear ribonucleoprotein Prp31	PRP31_MOUSE	-0.618459	0.0230484	0.738124	4.20881e-06
O70370	Ctss	Cathepsin S	CATS_MOUSE	-0.300593	0.0233061	0.738124	1.20907e-05
Q8C181	Mbnl2	Muscleblind-like protein 2	MBNL2_MOUSE	-0.435826	0.0233642	0.738124	2.70589e-05
O70305	Atxn2	Ataxin-2	ATX2_MOUSE	-0.564486	0.0239854	0.738124	1.49088e-05
P21619	Lmnb2	Lamin-B2	LMNB2_MOUSE	0.126495	0.0240706	0.738124	0.000151543
Q0VGY8	Tanc1	Protein TANC1	TANC1_MOUSE	-1.08454	0.0240908	0.738124	1.84531e-06
Q8QZZ7	Tprkb	EKC/KEOPS complex subunit Tprkb	TPRKB_MOUSE	-0.235207	0.0241342	0.738124	6.66094e-06
Q9DBZ5	Eif3k	Eukaryotic translation initiation factor 3 subunit K	EIF3K_MOUSE	-0.182544	0.0242608	0.738124	4.24918e-05
Q5SW19	Cluh	Clustered mitochondria protein homolog	CLU_MOUSE	-0.310244	0.0242644	0.738124	2.08355e-05
Q91YI4	Arrb2	Beta-arrestin-2	ARRB2_MOUSE	-0.220625	0.0243131	0.738124	7.62674e-06
Q3THK7	Gmps	GMP synthase [glutamine-hydrolyzing]	GUAA_MOUSE	-0.195634	0.0243448	0.738124	0.000144847
Q8VDD8	Washc1	WASH complex subunit 1	WASH1_MOUSE	-0.361661	0.0243494	0.738124	1.69246e-05
Q8BVQ5	Ppme1	Protein phosphatase methylesterase 1	PPME1_MOUSE	-0.19771	0.0246109	0.742105	0.000159338
Q8BRJ3	Rell2	RELT-like protein 2	RELL2_MOUSE	-0.627514	0.0248336	0.744012	1.74546e-05
Q80X50	Ubap2l	Ubiquitin-associated protein 2-like	UBP2L_MOUSE	-0.624197	0.0252391	0.744012	4.03406e-05
P12023,P08592	App	Amyloid-beta A4 protein	A4_MOUSE,A4_RAT	-0.297025	0.0253483	0.744012	0.000112914
Q91W82;P52483	Ube2e2;Ube2e3	Ubiquitin-conjugating enzyme E2 E2;Ubiquitin-conjugating enzyme E2 E3	UB2E2_MOUSE;UB2E3_MOUSE	-0.370402	0.0256942	0.744012	1.79405e-05
P13439	Umps	Uridine 5'-monophosphate synthase	UMPS_MOUSE	-0.445618	0.0257825	0.744012	7.60515e-06
P0C673	Igsf11	Immunoglobulin superfamily member 11	IGS11_MOUSE	-1.31402	0.0258357	0.744012	3.23063e-06
Q6ZWM4	Lsm8	U6 snRNA-associated Sm-like protein LSm8	LSM8_MOUSE	-0.294337	0.0260016	0.744012	2.24225e-05
Q9D187	Ciao2b	Cytosolic iron-sulfur assembly component 2B	CIA2B_MOUSE	-0.59049	0.0260584	0.744012	2.66555e-06
Q99KK2	Cmas	N-acylneuraminate cytidylyltransferase	NEUA_MOUSE	-0.333467	0.026106	0.744012	7.67194e-05
Q91VR5	Ddx1	ATP-dependent RNA helicase DDX1	DDX1_MOUSE	-0.201469	0.026485	0.744012	0.000122523
Q8BVG4	Dpp9	Dipeptidyl peptidase 9	DPP9_MOUSE	-0.203217	0.0265934	0.744012	1.0355e-05
Q8VHE0	Sec63	Translocation protein SEC63 homolog	SEC63_MOUSE	0.190548	0.0267889	0.744012	1.23994e-05
Q3UHD3	Mtus2	Microtubule-associated tumor suppressor candidate 2 homolog	MTUS2_MOUSE	-0.251263	0.0268111	0.744012	2.61998e-06
Q9D3E6;O35638	Stag1;Stag2	Cohesin subunit SA-1;Cohesin subunit SA-2	STAG1_MOUSE;STAG2_MOUSE	-0.246571	0.0269556	0.744012	6.17014e-06
P63248	Pkia	cAMP-dependent protein kinase inhibitor alpha	IPKA_MOUSE	-0.209027	0.0270655	0.744012	4.89549e-05
Q8C1Y8	Ccz1	Vacuolar fusion protein CCZ1 homolog	CCZ1_MOUSE	-0.0921137	0.0270824	0.744012	2.00439e-05
P70195	Psmb7	Proteasome subunit beta type-7	PSB7_MOUSE	0.202778	0.0271477	0.744012	0.000112519
Q9Z1Z0	Uso1	General vesicular transport factor p115	USO1_MOUSE	-0.139574	0.0271521	0.744012	7.67945e-05
Q9D164	Fxyd6	FXYD domain-containing ion transport regulator 6	FXYD6_MOUSE	-0.187951	0.0272129	0.744012	0.000306329
Q9CQY2	Ramac	RNA guanine-N7 methyltransferase activating subunit	RAMAC_MOUSE	-0.547954	0.0272852	0.744012	1.50643e-05
Q9R1P1	Psmb3	Proteasome subunit beta type-3	PSB3_MOUSE	-0.197324	0.0276697	0.745449	0.000129518
Q9DCJ5	Ndufa8	NADH dehydrogenase [ubiquinone] 1 alpha subcomplex subunit 8	NDUA8_MOUSE	0.126873	0.027811	0.745449	0.000392904
Q9JM96	Cdc42ep4	Cdc42 effector protein 4	BORG4_MOUSE	-0.472575	0.0278498	0.745449	3.72856e-05
Q04758	Pkib	cAMP-dependent protein kinase inhibitor beta	IPKB_MOUSE	0.532287	0.0278612	0.745449	2.50014e-06
Q8BJH1	Zc2hc1a	Zinc finger C2HC domain-containing protein 1A	ZC21A_MOUSE	-0.237959	0.0280094	0.745913	0.000126501
Q3U308	Ctu2	Cytoplasmic tRNA 2-thiolation protein 2	CTU2_MOUSE	-0.222542	0.0283536	0.748906	6.24031e-06
P61028	Rab8b	Ras-related protein Rab-8B	RAB8B_MOUSE	0.52103	0.0283846	0.748906	5.31073e-05
Q78XF5	Ostc	Oligosaccharyltransferase complex subunit OSTC	OSTC_MOUSE	0.154681	0.0286326	0.751331	3.7879e-05
Q9CRC0	Vkorc1	Vitamin K epoxide reductase complex subunit 1	VKOR1_MOUSE	0.471656	0.0289283	0.751331	2.51728e-05
Q9QYR6	Map1a	Microtubule-associated protein 1A	MAP1A_MOUSE	-0.316557	0.0289969	0.751331	0.000995928
Q8CI75	Dis3l2	DIS3-like exonuclease 2	DI3L2_MOUSE	-0.0780057	0.029046	0.751331	2.7159e-05
Q9CQQ0	Smim8	Small integral membrane protein 8	SMIM8_MOUSE	0.315764	0.0295588	0.751331	1.70595e-05
O88741	Gdap1	Ganglioside-induced differentiation-associated protein 1	GDAP1_MOUSE	0.088537	0.0299252	0.751331	0.000248521
P10630	Eif4a2	Eukaryotic initiation factor 4A-II	IF4A2_MOUSE	-0.36721	0.030031	0.751331	0.000162142
Q9QYY8	Spast	Spastin	SPAST_MOUSE	0.160102	0.0302301	0.751331	1.35645e-05
Q9CR39	Wdr45b	WD repeat domain phosphoinositide-interacting protein 3	WIPI3_MOUSE	-0.190886	0.0305967	0.751331	1.31966e-05
P97364	Sephs2	Selenide, water dikinase 2	SPS2_MOUSE	-1.01479	0.0306891	0.751331	2.94242e-06
O08579	Emd	Emerin	EMD_MOUSE	-0.443692	0.0307186	0.751331	5.41214e-05
O35963	Rab33b	Ras-related protein Rab-33B	RB33B_MOUSE	0.283797	0.030725	0.751331	4.71268e-05
P57776	Eef1d	Elongation factor 1-delta	EF1D_MOUSE	-0.205741	0.0308245	0.751331	0.000415551
Q0VGB7	Ppp4r2	Serine/threonine-protein phosphatase 4 regulatory subunit 2	PP4R2_MOUSE	-1.04913	0.0310429	0.751331	2.9968e-06
Q61990	Pcbp2	Poly(rC)-binding protein 2	PCBP2_MOUSE	-0.192843	0.0312309	0.751331	0.000338255
Q61036	Pak3	Serine/threonine-protein kinase PAK 3	PAK3_MOUSE	-0.189117	0.0312517	0.751331	7.04466e-05
Q6IFT4	Arhgap20	Rho GTPase-activating protein 20	RHG20_MOUSE	-2.22459	0.0312597	0.751331	3.5486e-07
Q14BB9	Map6d1	MAP6 domain-containing protein 1	MA6D1_MOUSE	-0.742913	0.0312992	0.751331	8.78624e-05
P18572	Bsg	Basigin	BASI_MOUSE	0.108656	0.0313861	0.751331	0.000268078
Q80W04	Tmcc2	Transmembrane and coiled-coil domains protein 2	TMCC2_MOUSE	-0.522089	0.0314427	0.751331	1.55987e-05
Q3U1J4	Ddb1	DNA damage-binding protein 1	DDB1_MOUSE	-0.140559	0.0315256	0.751331	0.000128396
Q06335	Aplp2	Amyloid-like protein 2	APLP2_MOUSE	-0.499109	0.031542	0.751331	5.15079e-05
Q91WJ8	Fubp1	Far upstream element-binding protein 1	FUBP1_MOUSE	-0.42523	0.0315535	0.751331	5.51027e-05
Q9DAM5	Slc25a19	Mitochondrial thiamine pyrophosphate carrier	TPC_MOUSE	0.167728	0.0316405	0.751331	6.53073e-06
Q99LE6	Abcf2	ATP-binding cassette sub-family F member 2	ABCF2_MOUSE	-0.19821	0.032008	0.756902	2.85657e-05
P52503	Ndufs6	NADH dehydrogenase [ubiquinone] iron-sulfur protein 6, mitochondrial	NDUS6_MOUSE	0.100633	0.0322392	0.759219	0.000534105
P63158;O49595,P09429	Hmgb1;HMGB1,HMGB1	High mobility group protein B1;High mobility group B protein 1,High mobility group protein B1	HMGB1_MOUSE;HMGB1_ARATH,HMGB1_HUMAN	-0.178004	0.0325113	0.762024	0.000180175
P68510	Ywhah	14-3-3 protein eta	1433F_MOUSE	-0.135223	0.0326297	0.762024	0.000573304
Q6A058	Armcx2	Armadillo repeat-containing X-linked protein 2	ARMX2_MOUSE	-0.971171	0.0328196	0.762024	3.35062e-06
Q8K0C9	Gmds	GDP-mannose 4,6 dehydratase	GMDS_MOUSE	-0.0906371	0.0328931	0.762024	4.22776e-05
Q6P5H6	Frmd5	FERM domain-containing protein 5	FRMD5_MOUSE	-0.920461	0.0331461	0.764775	3.1269e-06
O70493	Snx12	Sorting nexin-12	SNX12_MOUSE	-0.117285	0.0333933	0.767328	0.000148098
O08715	Akap1	A-kinase anchor protein 1, mitochondrial	AKAP1_MOUSE	-1.11309	0.033526	0.767328	9.66516e-06
Q8VCM8	Ncln	Nicalin	NCLN_MOUSE	0.299299	0.0337708	0.769839	3.61927e-05
P51859	Hdgf	Hepatoma-derived growth factor	HDGF_MOUSE	-0.595051	0.0340362	0.772321	0.000109354
Q91YE3	Egln1	Egl nine homolog 1	EGLN1_MOUSE	-0.162955	0.0341507	0.772321	6.0792e-06
Q9CVD2	Atxn3	Ataxin-3	ATX3_MOUSE	-0.343765	0.0343849	0.773462	2.17509e-06
Q9CQA3	Sdhb	Succinate dehydrogenase [ubiquinone] iron-sulfur subunit, mitochondrial	SDHB_MOUSE	0.0678301	0.0344726	0.773462	0.000799986
Q9DC23	Dnajc10	DnaJ homolog subfamily C member 10	DJC10_MOUSE	0.318958	0.0346794	0.774475	8.53816e-06
Q8C0E2	Vps26b	Vacuolar protein sorting-associated protein 26B	VP26B_MOUSE	-0.120879	0.0347896	0.774475	0.000221493
Q9DB25	Alg5	Dolichyl-phosphate beta-glucosyltransferase	ALG5_MOUSE	0.107988	0.0349877	0.775856	1.90366e-05
Q8BGD9	Eif4b	Eukaryotic translation initiation factor 4B	IF4B_MOUSE	-0.220144	0.035394	0.781823	0.000231444
Q62448	Eif4g2	Eukaryotic translation initiation factor 4 gamma 2	IF4G2_MOUSE	-0.282375	0.0357493	0.784733	3.48081e-05
Q71M36	Cspg5	Chondroitin sulfate proteoglycan 5	CSPG5_MOUSE	-1.49614	0.0362245	0.784733	8.89715e-05
Q6P1H6	Ankle2	Ankyrin repeat and LEM domain-containing protein 2	ANKL2_MOUSE	-0.563906	0.0362687	0.784733	3.55651e-06
P61027	Rab10	Ras-related protein Rab-10	RAB10_MOUSE	0.121927	0.036352	0.784733	0.000269408
Q8BWZ3	Naa25	N-alpha-acetyltransferase 25, NatB auxiliary subunit	NAA25_MOUSE	-0.25605	0.0363833	0.784733	1.15064e-05
Q9CYR0	Ssbp1	Single-stranded DNA-binding protein, mitochondrial	SSBP_MOUSE	0.375815	0.0365207	0.784733	7.61032e-05
P14211	Calr	Calreticulin	CALR_MOUSE	0.147174	0.0366791	0.784733	0.000506914
O54901	Cd200	OX-2 membrane glycoprotein	OX2G_MOUSE	0.121294	0.0367235	0.784733	0.000348047
Q9Z0R4	Itsn1	Intersectin-1	ITSN1_MOUSE	-0.177383	0.0371467	0.784733	6.45072e-05
Q8BFU3	Rnf214	RING finger protein 214	RN214_MOUSE	-0.232592	0.0371572	0.784733	4.59531e-05
Q8R105	Vps37c	Vacuolar protein sorting-associated protein 37C	VP37C_MOUSE	-0.289688	0.0373299	0.784733	9.62904e-06
Q68FH4	Galk2	N-acetylgalactosamine kinase	GALK2_MOUSE	-0.498919	0.0373796	0.784733	6.04882e-06
Q8R1B4	Eif3c	Eukaryotic translation initiation factor 3 subunit C	EIF3C_MOUSE	-0.210654	0.0374367	0.784733	3.89688e-05
P57722	Pcbp3	Poly(rC)-binding protein 3	PCBP3_MOUSE	-0.48904	0.0374535	0.784733	1.5411e-05
Q9WUM5	Suclg1	Succinate--CoA ligase [ADP/GDP-forming] subunit alpha, mitochondrial	SUCA_MOUSE	0.147836	0.0378786	0.790732	0.000595336
Q9ESP1	Sdf2l1	Stromal cell-derived factor 2-like protein 1	SDF2L_MOUSE	0.230588	0.0381166	0.790911	9.56749e-06
Q8R127	Sccpdh	Saccharopine dehydrogenase-like oxidoreductase	SCPDL_MOUSE	0.143479	0.038358	0.790911	0.000417531
Q9D1J3	Sarnp	SAP domain-containing ribonucleoprotein	SARNP_MOUSE	-0.598163	0.0385017	0.790911	3.46555e-05
Q60596	Xrcc1	DNA repair protein XRCC1	XRCC1_MOUSE	-0.359846	0.0385759	0.790911	6.80478e-06
Q9CWK8	Snx2	Sorting nexin-2	SNX2_MOUSE	-0.16074	0.038581	0.790911	7.57771e-05
Q8VEM8	Slc25a3	Phosphate carrier protein, mitochondrial	MPCP_MOUSE	0.111411	0.0389145	0.793324	0.00191045
O70251	Eef1b	Elongation factor 1-beta	EF1B_MOUSE	-0.246937	0.0391031	0.793324	0.000231936
Q9D3A9	Ttyh1	Protein tweety homolog 1	TTYH1_MOUSE	0.0975505	0.0391163	0.793324	0.00037565
Q9R022	Dnajc12	DnaJ homolog subfamily C member 12	DJC12_MOUSE	-0.367517	0.0393908	0.793616	4.50796e-06
Q9CZG9	Pdzd11	PDZ domain-containing protein 11	PDZ11_MOUSE	-0.38107	0.0394093	0.793616	7.14853e-06
P0C8B4	Gon7	EKC/KEOPS complex subunit GON7	GON7_MOUSE	-0.214822	0.0397419	0.797496	4.52507e-06
P26043	Rdx	Radixin	RADI_MOUSE	-0.189724	0.040036	0.799736	0.000256214
Q64337	Sqstm1	Sequestosome-1	SQSTM_MOUSE	-0.143764	0.040246	0.799736	3.79457e-05
O35166	Gosr2	Golgi SNAP receptor complex member 2	GOSR2_MOUSE	0.280717	0.0403575	0.799736	1.14025e-05
Q8BG95	Ppp1r12b	Protein phosphatase 1 regulatory subunit 12B	MYPT2_MOUSE	0.561262	0.0405138	0.799736	2.64731e-05
Q80X71	Tmem106b	Transmembrane protein 106B	T106B_MOUSE	0.465847	0.0405551	0.799736	1.5051e-05
Q7TNE3	Spag7	Sperm-associated antigen 7	SPAG7_MOUSE	-0.504267	0.0407005	0.799832	9.82e-06
Q9Z0X1	Aifm1	Apoptosis-inducing factor 1, mitochondrial	AIFM1_MOUSE	0.041354	0.0408407	0.799832	0.000143853
Q9CQX2	Cyb5b	Cytochrome b5 type B	CYB5B_MOUSE	-0.688458	0.0412225	0.804544	0.000161119
Q9DCM4	Dnal4	Dynein light chain 4, axonemal	DNAL4_MOUSE	-2.26601	0.0417111	0.805174	8.88387e-07
Q6IR34	Gpsm1	G-protein-signaling modulator 1	GPSM1_MOUSE	-0.251903	0.041975	0.805174	4.54841e-05
Q9D8X2	Ccdc124	Coiled-coil domain-containing protein 124	CC124_MOUSE	-0.705121	0.0421716	0.805174	1.25786e-05
Q80XI4	Pip4k2b	Phosphatidylinositol 5-phosphate 4-kinase type-2 beta	PI42B_MOUSE	0.113462	0.0423309	0.805174	0.000285474
Q9DCX2	Atp5pd	ATP synthase subunit d, mitochondrial	ATP5H_MOUSE	0.129896	0.0423596	0.805174	0.00231751
Q924C1	Xpo5	Exportin-5	XPO5_MOUSE	-0.202457	0.0425966	0.805174	1.44259e-05
P32233	Drg1	Developmentally-regulated GTP-binding protein 1	DRG1_MOUSE	-0.266227	0.043066	0.805174	1.28023e-05
Q05D44	Eif5b	Eukaryotic translation initiation factor 5B	IF2P_MOUSE	-0.174863	0.0430753	0.805174	1.4529e-05
Q8CIQ7	Dock3	Dedicator of cytokinesis protein 3	DOCK3_MOUSE	0.082184	0.0432374	0.805174	0.000289175
Q8VHL1	Setd7	Histone-lysine N-methyltransferase SETD7	SETD7_MOUSE	-0.144134	0.043276	0.805174	0.000110954
O35900;Q1H595,Q9Y333	Lsm2;LSM2,LSM2	U6 snRNA-associated Sm-like protein LSm2;Sm-like protein LSM2,U6 snRNA-associated Sm-like protein LSm2	LSM2_MOUSE;LSM2_ARATH,LSM2_HUMAN	-0.519747	0.0433284	0.805174	8.43486e-06
P43024	Cox6a1	Cytochrome c oxidase subunit 6A1, mitochondrial	CX6A1_MOUSE	0.0998966	0.0434794	0.805174	0.000226348
Q91W67	Ubl7	Ubiquitin-like protein 7	UBL7_MOUSE	-0.304837	0.0435328	0.805174	1.05711e-05
Q3UGC7	Eif3j1	Eukaryotic translation initiation factor 3 subunit J-A	EI3JA_MOUSE	-0.263227	0.0442655	0.805174	0.000107573
P51432	Plcb3	1-phosphatidylinositol 4,5-bisphosphate phosphodiesterase beta-3	PLCB3_MOUSE	-0.293763	0.0444276	0.805174	1.0715e-05
Q8BTE0	Sdhaf4	Succinate dehydrogenase assembly factor 4, mitochondrial	SDHF4_MOUSE	0.181017	0.0444779	0.805174	1.61358e-05
Q6NZC7	Sec23ip	SEC23-interacting protein	S23IP_MOUSE	-0.218463	0.0448709	0.805174	1.73019e-05
Q8CGA4	Mturn	Maturin	MTURN_MOUSE	-0.22877	0.0449567	0.805174	1.17907e-05
Q921M7	Fam49b	Protein FAM49B	FA49B_MOUSE	-0.304489	0.0451297	0.805174	0.000369796
O70172	Pip4k2a	Phosphatidylinositol 5-phosphate 4-kinase type-2 alpha	PI42A_MOUSE	0.250926	0.0451955	0.805174	0.000131106
Q9D1Q4	Dpm3	Dolichol-phosphate mannosyltransferase subunit 3	DPM3_MOUSE	0.189097	0.0451996	0.805174	4.46583e-05
Q8CES0	Naa30	N-alpha-acetyltransferase 30	NAA30_MOUSE	-0.508764	0.0453648	0.805174	9.39163e-06
Q9CSU0	Rprd1b	Regulation of nuclear pre-mRNA domain-containing protein 1B	RPR1B_MOUSE	-0.3113	0.0454281	0.805174	1.28917e-05
Q5SS00	Zdbf2	DBF4-type zinc finger-containing protein 2 homolog	ZDBF2_MOUSE	-0.502559	0.0458073	0.805174	1.60586e-06
Q80SZ7	Gng5	Guanine nucleotide-binding protein G(I)/G(S)/G(O) subunit gamma-5	GBG5_MOUSE	0.653303	0.0458507	0.805174	0.000179916
Q9R099	Tbl2	Transducin beta-like protein 2	TBL2_MOUSE	0.265121	0.0459148	0.805174	6.26653e-06
Q9CR41	Hypk	Huntingtin-interacting protein K	HYPK_MOUSE	-0.25643	0.0460945	0.805174	2.2192e-05
Q61655	Ddx19a	ATP-dependent RNA helicase DDX19A	DD19A_MOUSE	-0.141698	0.0465709	0.805174	2.93284e-05
Q68FH0	Pkp4	Plakophilin-4	PKP4_MOUSE	-0.3376	0.046794	0.805174	6.98723e-05
Q9QZ06	Tollip	Toll-interacting protein	TOLIP_MOUSE	-0.168584	0.0471478	0.805174	0.000157155
Q8BMF4	Dlat	Dihydrolipoyllysine-residue acetyltransferase component of pyruvate dehydrogenase complex, mitochondrial	ODP2_MOUSE	0.0940125	0.0473803	0.805174	0.00133174
Q8N7N5	Dcaf8	DDB1- and CUL4-associated factor 8	DCAF8_MOUSE	-0.254456	0.0474563	0.805174	7.33905e-06
Q8BIP0	Dars2	Aspartate--tRNA ligase, mitochondrial	SYDM_MOUSE	0.125784	0.0474642	0.805174	1.39329e-05
Q8C080	Snx16	Sorting nexin-16	SNX16_MOUSE	-0.210598	0.0476714	0.805174	1.55628e-05
Q99LY9	Ndufs5	NADH dehydrogenase [ubiquinone] iron-sulfur protein 5	NDUS5_MOUSE	0.160482	0.0480501	0.805174	0.000456039
P59644	Inpp5j	Phosphatidylinositol 4,5-bisphosphate 5-phosphatase A	PI5PA_MOUSE	-0.381651	0.0482966	0.805174	1.69254e-05
Q7TSC1	Prrc2a	Protein PRRC2A	PRC2A_MOUSE	-0.199393	0.0484676	0.805174	2.03607e-05
Q3B7Z2	Osbp	Oxysterol-binding protein 1	OSBP1_MOUSE	-0.0868536	0.0484681	0.805174	6.81097e-05
Q9DBS1	Tmem43	Transmembrane protein 43	TMM43_MOUSE	0.128489	0.0485035	0.805174	2.22712e-05
Q9CY58	Serbp1	Plasminogen activator inhibitor 1 RNA-binding protein	PAIRB_MOUSE	-0.519268	0.0486667	0.805174	8.69928e-05
P53996	Cnbp	Cellular nucleic acid-binding protein	CNBP_MOUSE	-0.300596	0.0493864	0.805174	8.16061e-05
O09005	Degs1	Sphingolipid delta(4)-desaturase DES1	DEGS1_MOUSE	0.233887	0.0494351	0.805174	1.68537e-05
Q9CYG7	Tomm34	Mitochondrial import receptor subunit TOM34	TOM34_MOUSE	-0.243998	0.0494749	0.805174	5.40904e-05
Q3UJU9	Rmdn3	Regulator of microtubule dynamics protein 3	RMD3_MOUSE	-0.136964	0.0495005	0.805174	5.44235e-05
P58252	Eef2	Elongation factor 2	EF2_MOUSE	-0.105374	0.0495467	0.805174	0.000389332
Q9JKV1	Adrm1	Proteasomal ubiquitin receptor ADRM1	ADRM1_MOUSE	-0.17513	0.0496215	0.805174	6.95883e-05
P61922	Abat	4-aminobutyrate aminotransferase, mitochondrial	GABT_MOUSE	0.145687	0.0497499	0.805174	0.00213492
P53395	Dbt	Lipoamide acyltransferase component of branched-chain alpha-keto acid dehydrogenase complex, mitochondrial	ODB2_MOUSE	0.113034	0.0500326	0.805174	7.20529e-05
Q9Z1D1	Eif3g	Eukaryotic translation initiation factor 3 subunit G	EIF3G_MOUSE	-0.268248	0.0501204	0.805174	5.35149e-05
O55176	Pja1	E3 ubiquitin-protein ligase Praja-1	PJA1_MOUSE	-0.296299	0.0502541	0.805174	4.94959e-06
Q91WK2	Eif3h	Eukaryotic translation initiation factor 3 subunit H	EIF3H_MOUSE	-0.175355	0.0504092	0.805174	3.67048e-05
O88455	Dhcr7	7-dehydrocholesterol reductase	DHCR7_MOUSE	0.287005	0.0510913	0.805174	1.86779e-05
P97765	Wbp2	WW domain-binding protein 2	WBP2_MOUSE	-0.223005	0.0512453	0.805174	0.000206622
Q8C8T7	Elfn1	Protein ELFN1	ELFN1_MOUSE	-0.90051	0.0512727	0.805174	6.41888e-06
O35682	Myadm	Myeloid-associated differentiation marker	MYADM_MOUSE	0.128858	0.0515892	0.805174	0.000142367
Q3UTZ3	MAP11	Microtubule-associated protein 11	MA11_MOUSE	0.339542	0.0516457	0.805174	2.12154e-05
Q8VE47	Uba5	Ubiquitin-like modifier-activating enzyme 5	UBA5_MOUSE	-0.224761	0.0518211	0.805174	5.51839e-05
O70494	Sp3	Transcription factor Sp3	SP3_MOUSE	-0.898143	0.0518505	0.805174	1.55582e-06
Q4VAA2	Cdv3	Protein CDV3	CDV3_MOUSE	-0.217488	0.0518632	0.805174	7.50432e-05
Q64433	Hspe1	10 kDa heat shock protein, mitochondrial	CH10_MOUSE	0.0863105	0.051996	0.805174	0.00156615
P20934	Evi2a	Protein EVI2A	EVI2A_MOUSE	-1.31092	0.052075	0.805174	6.94908e-06
Q5U4C1	Gprasp1	G-protein coupled receptor-associated sorting protein 1	GASP1_MOUSE	-0.275779	0.0529632	0.805174	6.49433e-06
P70670,Q60817	Naca	Nascent polypeptide-associated complex subunit alpha, muscle-specific form,Nascent polypeptide-associated complex subunit alpha	NACAM_MOUSE,NACA_MOUSE	-0.218911	0.0530315	0.805174	0.000135782
Q78JE5	Fbxo22	F-box only protein 22	FBX22_MOUSE	-0.321742	0.0531778	0.805174	1.29906e-05
Q91W50	Csde1	Cold shock domain-containing protein E1	CSDE1_MOUSE	-0.201851	0.0531873	0.805174	7.52649e-05
P63002;Q08117	Tle5;TLE5	TLE family member 5	TLE5_MOUSE;TLE5_HUMAN	-0.29666	0.0532671	0.805174	7.69927e-06
Q3TC72	Fahd2	Fumarylacetoacetate hydrolase domain-containing protein 2A	FAHD2_MOUSE	0.0643025	0.0532832	0.805174	0.000189124
Q8BVF2	Pdcl3	Phosducin-like protein 3	PDCL3_MOUSE	-0.278806	0.0533909	0.805174	1.03187e-05
Q8R0I4	Tm2d2	TM2 domain-containing protein 2	TM2D2_MOUSE	0.253313	0.0534518	0.805174	6.45184e-06
Q9EPL8	Ipo7	Importin-7	IPO7_MOUSE	-0.141617	0.0536041	0.805174	8.34276e-05
Q9CXT8	Pmpcb	Mitochondrial-processing peptidase subunit beta	MPPB_MOUSE	0.761846	0.0536167	0.805174	0.000657328
Q8BYR5	Cadps2	Calcium-dependent secretion activator 2	CAPS2_MOUSE	-0.358173	0.0536828	0.805174	3.66973e-05
Q9CZ44	Nsfl1c	NSFL1 cofactor p47	NSF1C_MOUSE	-0.230611	0.0537146	0.805174	0.000188502
Q69ZF3	Gba2	Non-lysosomal glucosylceramidase	GBA2_MOUSE	-0.331268	0.0537256	0.805174	2.7517e-05
Q99L47	St13	Hsc70-interacting protein	F10A1_MOUSE	-0.168171	0.0538656	0.805174	0.000405191
Q8C8T8	Tsr2	Pre-rRNA-processing protein TSR2 homolog	TSR2_MOUSE	-0.165509	0.0538892	0.805174	0.000134208
Q9D6K7	Ttc33	Tetratricopeptide repeat protein 33	TTC33_MOUSE	-0.531061	0.0539188	0.805174	2.78315e-06
Q3UFY8	Trmt10c	tRNA methyltransferase 10 homolog C	TM10C_MOUSE	-0.335543	0.0540913	0.805174	8.78521e-06
A2AAE1	Kiaa1109	Transmembrane protein KIAA1109	K1109_MOUSE	-0.323044	0.0543886	0.805174	3.84326e-06
O35136	Ncam2	Neural cell adhesion molecule 2	NCAM2_MOUSE	0.252851	0.0544463	0.805174	0.000150042
O70401	Tspan6	Tetraspanin-6	TSN6_MOUSE	0.475817	0.0544682	0.805174	1.57471e-05
Q9D9Z5	Dda1	DET1- and DDB1-associated protein 1	DDA1_MOUSE	-0.310471	0.0546324	0.805174	8.19761e-06
Q9Z1P6	Ndufa7	NADH dehydrogenase [ubiquinone] 1 alpha subcomplex subunit 7	NDUA7_MOUSE	0.101658	0.054658	0.805174	0.000244196
Q80WM5	Hapln3	Hyaluronan and proteoglycan link protein 3	HPLN3_MOUSE	0.225168	0.054898	0.805174	1.05272e-05
O54786	Dffa	DNA fragmentation factor subunit alpha	DFFA_MOUSE	0.592152	0.0553378	0.805174	1.14149e-05
Q6P5F9	Xpo1	Exportin-1	XPO1_MOUSE	-0.218714	0.0553549	0.805174	5.81303e-05
O35623	Bet1	BET1 homolog	BET1_MOUSE	-0.174064	0.0554843	0.805174	4.17873e-06
P49312;P09867	Hnrnpa1;HNRNPA1	Heterogeneous nuclear ribonucleoprotein A1	ROA1_MOUSE;ROA1_BOVIN	-0.316824	0.0555268	0.805174	0.000366943
Q3UPL0	Sec31a	Protein transport protein Sec31A	SC31A_MOUSE	-0.202843	0.0557523	0.805174	7.52561e-05
P97371	Psme1	Proteasome activator complex subunit 1	PSME1_MOUSE	-0.150116	0.0559467	0.805174	8.79453e-05
Q6ZPJ3	Ube2o	(E3-independent) E2 ubiquitin-conjugating enzyme UBE2O	UBE2O_MOUSE	-0.127306	0.0559559	0.805174	7.66942e-05
Q8VCI5	Pex19	Peroxisomal biogenesis factor 19	PEX19_MOUSE	-0.320687	0.0560406	0.805174	1.63876e-05
P62983	Rps27a	Ubiquitin-40S ribosomal protein S27a	RS27A_MOUSE	-0.247179	0.0561112	0.805174	0.00277277
Q9CZ13	Uqcrc1	Cytochrome b-c1 complex subunit 1, mitochondrial	QCR1_MOUSE	0.0818686	0.0561241	0.805174	0.00193056
Q8CHK3	Mboat7	Lysophospholipid acyltransferase 7	MBOA7_MOUSE	0.258165	0.056359	0.805174	4.01201e-05
Q3UYH7	Adrbk2	Beta-adrenergic receptor kinase 2	ARBK2_MOUSE	-0.0970344	0.0563678	0.805174	3.70902e-05
Q8K273	Mmgt1	Membrane magnesium transporter 1	MMGT1_MOUSE	0.20932	0.0563702	0.805174	2.75039e-05
Q99LS3	Psph	Phosphoserine phosphatase	SERB_MOUSE	0.244917	0.0563838	0.805174	5.35053e-05
Q8CJ67	Stau2	Double-stranded RNA-binding protein Staufen homolog 2	STAU2_MOUSE	-0.249557	0.0564224	0.805174	3.43025e-06
P47740	Aldh3a2	Aldehyde dehydrogenase family 3 member A2	AL3A2_MOUSE	0.205115	0.056493	0.805174	6.19229e-05
Q52KI8	Srrm1	Serine/arginine repetitive matrix protein 1	SRRM1_MOUSE	0.27934	0.0565791	0.805174	2.00739e-05
Q6PER3	Mapre3	Microtubule-associated protein RP/EB family member 3	MARE3_MOUSE	-0.241751	0.0566616	0.805174	0.000807282
Q8BYN3	Itpk1	Inositol-tetrakisphosphate 1-kinase	ITPK1_MOUSE	-0.4604	0.0566988	0.805174	1.75132e-05
Q91YT0	Ndufv1	NADH dehydrogenase [ubiquinone] flavoprotein 1, mitochondrial	NDUV1_MOUSE	0.100299	0.0567166	0.805174	0.00056127
Q99J39	Mlycd	Malonyl-CoA decarboxylase, mitochondrial	DCMC_MOUSE	0.295519	0.0568025	0.805174	1.80716e-05
Q66GT5	Ptpmt1	Phosphatidylglycerophosphatase and protein-tyrosine phosphatase 1	PTPM1_MOUSE	0.151969	0.0568329	0.805174	2.31868e-05
Q8BY87	Usp47	Ubiquitin carboxyl-terminal hydrolase 47	UBP47_MOUSE	-0.20448	0.0572663	0.805174	1.4617e-05
Q61316	Hspa4	Heat shock 70 kDa protein 4	HSP74_MOUSE	-0.0772955	0.0573502	0.805174	0.000480801
Q9D772	Fam219a	Protein FAM219A	F219A_MOUSE	-0.238057	0.0574018	0.805174	8.75579e-06
Q8BFY6	Pef1	Peflin	PEF1_MOUSE	0.258007	0.0574277	0.805174	9.49758e-05
P97379	G3bp2	Ras GTPase-activating protein-binding protein 2	G3BP2_MOUSE	-0.290523	0.0574802	0.805174	8.8022e-05
P62631	Eef1a2	Elongation factor 1-alpha 2	EF1A2_MOUSE	-0.191056	0.0575677	0.805174	0.00204232
Q91X58	Zfand2b	AN1-type zinc finger protein 2B	ZFN2B_MOUSE	-0.235851	0.0578389	0.805174	1.52036e-05
Q3UGS4	Mcrip1	Mapk-regulated corepressor-interacting protein 1	MCRI1_MOUSE	-0.383891	0.0578863	0.805174	2.58619e-05
Q99JX3	Gorasp2	Golgi reassembly-stacking protein 2	GORS2_MOUSE	-0.192156	0.0580393	0.805174	6.14975e-05
P59114	Pcif1	mRNA (2'-O-methyladenosine-N(6)-)-methyltransferase	CAPAM_MOUSE	-1.8434	0.0580438	0.805174	1.83277e-06
Q9CR70	Lage3	EKC/KEOPS complex subunit Lage3	LAGE3_MOUSE	-0.29411	0.0581152	0.805174	2.1191e-06
Q9D2C2	Saal1	Protein SAAL1	SAAL1_MOUSE	-0.57289	0.0582125	0.805174	1.84532e-06
Q8CHU3	Epn2	Epsin-2	EPN2_MOUSE	-0.181246	0.0582561	0.805174	7.88485e-05
Q64327	Mea1	Male-enhanced antigen 1	MEA1_MOUSE	-0.387508	0.0583528	0.805174	1.38623e-05
Q8QZY1	Eif3l	Eukaryotic translation initiation factor 3 subunit L	EIF3L_MOUSE	-0.174839	0.0583944	0.805174	4.41878e-05
P61211	Arl1	ADP-ribosylation factor-like protein 1	ARL1_MOUSE	-0.357618	0.0585835	0.805174	2.17925e-05
Q9ES00	Ube4b	Ubiquitin conjugation factor E4 B	UBE4B_MOUSE	-0.358212	0.0586326	0.805174	1.05256e-05
Q9ERE7	Mesd	LRP chaperone MESD	MESD_MOUSE	0.108011	0.058783	0.805299	2.87735e-05
Q1HKZ5	Map3k13	Mitogen-activated protein kinase kinase kinase 13	M3K13_MOUSE	-0.62719	0.0592185	0.807973	2.39348e-06
Q9DBF1,Q64057	Aldh7a1	Alpha-aminoadipic semialdehyde dehydrogenase	AL7A1_MOUSE,AL7A1_RAT	0.0867528	0.0592617	0.807973	0.000186179
Q08943	Ssrp1	FACT complex subunit SSRP1	SSRP1_MOUSE	-0.323729	0.0594113	0.808079	1.20727e-05
Q9QZE7	Tsnax	Translin-associated protein X	TSNAX_MOUSE	-0.216529	0.0595726	0.808344	1.99617e-05
Q3THS6	Mat2a	S-adenosylmethionine synthase isoform type-2	METK2_MOUSE	-0.166972	0.0601483	0.811877	0.000136762
Q9CR86	Carhsp1	Calcium-regulated heat stable protein 1	CHSP1_MOUSE	-0.499556	0.0602931	0.811877	0.000130816
Q7TSJ2	Map6	Microtubule-associated protein 6	MAP6_MOUSE	-0.280797	0.0610734	0.811877	0.0012335
Q8BGZ1	Hpcal4	Hippocalcin-like protein 4	HPCL4_MOUSE	0.106844	0.0610942	0.811877	0.000727346
Q78YZ6	Scoc	Short coiled-coil protein	SCOC_MOUSE	-0.50575	0.0611103	0.811877	1.51737e-05
Q3UHX2	Pdap1	28 kDa heat- and acid-stable phosphoprotein	HAP28_MOUSE	-0.191313	0.0613588	0.811877	0.000114572
P60060	Sec61g	Protein transport protein Sec61 subunit gamma	SC61G_MOUSE	-0.539741	0.061383	0.811877	2.43102e-05
Q8BGW1	Fto	Alpha-ketoglutarate-dependent dioxygenase FTO	FTO_MOUSE	-0.450638	0.0613861	0.811877	8.64452e-06
Q8BHW2	Oscp1	Protein OSCP1	OSCP1_MOUSE	-0.189094	0.061403	0.811877	9.37835e-05
Q8BHS8	Sybu	Syntabulin	SYBU_MOUSE	-0.841783	0.0614257	0.811877	3.66333e-06
Q3TUH1	Tamm41	Phosphatidate cytidylyltransferase, mitochondrial	TAM41_MOUSE	0.203741	0.0615973	0.811877	2.31653e-05
Q78PY7	Snd1	Staphylococcal nuclease domain-containing protein 1	SND1_MOUSE	-0.19212	0.0616469	0.811877	8.18878e-05
Q64338	Pde1c	Calcium/calmodulin-dependent 3',5'-cyclic nucleotide phosphodiesterase 1C	PDE1C_MOUSE	-0.368686	0.061685	0.811877	3.05216e-06
Q6PGG6	Gnl3l	Guanine nucleotide-binding protein-like 3-like protein	GNL3L_MOUSE	-1.26965	0.0621802	0.814925	7.15843e-07
Q3U3R4	Lmf1	Lipase maturation factor 1	LMF1_MOUSE	0.370096	0.0622025	0.814925	1.09076e-05
Q6PB93	Galnt2	Polypeptide N-acetylgalactosaminyltransferase 2	GALT2_MOUSE	0.275526	0.0625299	0.816159	1.42847e-06
Q9D0I4	Stx17	Syntaxin-17	STX17_MOUSE	-0.267094	0.0626972	0.816159	1.06071e-05
Q5FWH2	Unkl	Putative E3 ubiquitin-protein ligase UNKL	UNKL_MOUSE	-1.64506	0.0627264	0.816159	9.80996e-07
Q5XJY4	Parl	Presenilins-associated rhomboid-like protein, mitochondrial	PARL_MOUSE	0.152382	0.063175	0.820124	1.16397e-05
Q9D8S3	Arfgap3	ADP-ribosylation factor GTPase-activating protein 3	ARFG3_MOUSE	-0.220841	0.0635833	0.823548	1.10426e-05
Q8R035	Mrpl58	Peptidyl-tRNA hydrolase ICT1, mitochondrial	ICT1_MOUSE	0.130552	0.0639003	0.825777	2.97657e-05
Q3URE9	Lingo2	Leucine-rich repeat and immunoglobulin-like domain-containing nogo receptor-interacting protein 2	LIGO2_MOUSE	0.187463	0.0642465	0.828373	8.23121e-06
Q3TLS3	Gdpgp1	GDP-D-glucose phosphorylase 1	GDPP1_MOUSE	-0.146845	0.0645422	0.828815	1.85421e-05
Q80T23	Sytl5	Synaptotagmin-like protein 5	SYTL5_MOUSE	-0.584884	0.0646209	0.828815	3.56006e-06
P62311	Lsm3	U6 snRNA-associated Sm-like protein LSm3	LSM3_MOUSE	-0.16576	0.0649908	0.828815	7.21114e-05
Q9CYR6	Pgm3	Phosphoacetylglucosamine mutase	AGM1_MOUSE	0.28871	0.0650457	0.828815	4.56822e-05
Q9D1H7	Get4	Golgi to ER traffic protein 4 homolog	GET4_MOUSE	-0.124054	0.0650671	0.828815	3.28645e-05
Q8K341	Atat1	Alpha-tubulin N-acetyltransferase 1	ATAT_MOUSE	-0.358954	0.0654311	0.828815	2.00864e-05
Q6SKR2	N6amt1	Methyltransferase N6AMT1	N6MT1_MOUSE	-0.167809	0.0654484	0.828815	9.89192e-06
Q9D1A2	Cndp2	Cytosolic non-specific dipeptidase	CNDP2_MOUSE	-0.0532865	0.0659955	0.828815	0.000298088
Q91WC0	Setd3	Actin-histidine N-methyltransferase	SETD3_MOUSE	-0.324671	0.0661537	0.828815	1.96652e-05
Q9QZB9	Dctn5	Dynactin subunit 5	DCTN5_MOUSE	0.288131	0.0662206	0.828815	5.34422e-05
O54950	Prkag1	5'-AMP-activated protein kinase subunit gamma-1	AAKG1_MOUSE	-0.363544	0.0664647	0.828815	9.04312e-06
Q9D074	Mgrn1	E3 ubiquitin-protein ligase MGRN1	MGRN1_MOUSE	-0.204264	0.066487	0.828815	5.55512e-06
Q5U430	Ubr3	E3 ubiquitin-protein ligase UBR3	UBR3_MOUSE	-0.197317	0.0668001	0.828815	1.32051e-05
Q68FE6	Ripor1	Rho family-interacting cell polarization regulator 1	RIPR1_MOUSE	-0.378969	0.0668067	0.828815	8.89214e-06
Q9QZN1	Fbxl17	F-box/LRR-repeat protein 17	FXL17_MOUSE	-0.611398	0.0669616	0.828815	1.81045e-05
A2AB59	Arhgap27	Rho GTPase-activating protein 27	RHG27_MOUSE	-0.977976	0.0671337	0.828815	2.13459e-06
Q9WTK7	Stk11	Serine/threonine-protein kinase STK11	STK11_MOUSE	0.0971587	0.0672667	0.828815	1.55906e-05
Q3TAS6	Emc10	ER membrane protein complex subunit 10	EMC10_MOUSE	0.156764	0.0673836	0.828815	2.47149e-05
P70310	Ntsr2	Neurotensin receptor type 2	NTR2_MOUSE	-0.19658	0.0675873	0.828815	6.31262e-06
Q80U49	Cep170b	Centrosomal protein of 170 kDa protein B	C170B_MOUSE	-0.163958	0.0676114	0.828815	4.8677e-05
Q91XD6	Vps36	Vacuolar protein-sorting-associated protein 36	VPS36_MOUSE	-0.119667	0.0678789	0.828815	1.45756e-05
Q8VCK3	Tubg2	Tubulin gamma-2 chain	TBG2_MOUSE	0.310403	0.0680544	0.828815	1.68513e-06
Q3TIV5	Zc3h15	Zinc finger CCCH domain-containing protein 15	ZC3HF_MOUSE	-0.339406	0.0682329	0.828815	2.72271e-06
Q6PHN9	Rab35	Ras-related protein Rab-35	RAB35_MOUSE	0.538109	0.0682624	0.828815	0.00011279
Q80XP9	Wnk3	Serine/threonine-protein kinase WNK3	WNK3_MOUSE	-0.369672	0.0683202	0.828815	2.4241e-06
P62746	Rhob	Rho-related GTP-binding protein RhoB	RHOB_MOUSE	0.169363	0.068421	0.828815	0.000621852
Q9JJG6	Tmem47	Transmembrane protein 47	TMM47_MOUSE	0.446651	0.0685168	0.828815	1.91658e-05
Q9QUI0	Rhoa	Transforming protein RhoA	RHOA_MOUSE	0.143605	0.0685174	0.828815	0.000896616
O88685	Psmc3	26S proteasome regulatory subunit 6A	PRS6A_MOUSE	-0.0981513	0.0686248	0.828815	0.000123589
Q9CQ54	Ndufc2	NADH dehydrogenase [ubiquinone] 1 subunit C2	NDUC2_MOUSE	0.0887199	0.0687041	0.828815	0.000480202
Q9DBR7	Ppp1r12a	Protein phosphatase 1 regulatory subunit 12A	MYPT1_MOUSE	-0.284233	0.0689427	0.828815	7.19339e-05
Q63739	Ptp4a1	Protein tyrosine phosphatase type IVA 1	TP4A1_MOUSE	0.291262	0.0690108	0.828815	5.62672e-06
Q9CQT1	Mri1	Methylthioribose-1-phosphate isomerase	MTNA_MOUSE	-0.189903	0.0690813	0.828815	2.2921e-05
Q9Z275	Rlbp1	Retinaldehyde-binding protein 1	RLBP1_MOUSE	-1.23061	0.0693702	0.828815	1.87444e-05
Q9JHS9	Cwc15	Spliceosome-associated protein CWC15 homolog	CWC15_MOUSE	-0.58311	0.0695104	0.828815	6.48484e-06
Q8BPM2	Map4k5	Mitogen-activated protein kinase kinase kinase kinase 5	M4K5_MOUSE	-0.274501	0.0696285	0.828815	3.68292e-06
Q91YJ3	Thyn1	Thymocyte nuclear protein 1	THYN1_MOUSE	-0.425118	0.0697712	0.828815	1.16421e-05
Q9DCM2	Gstk1	Glutathione S-transferase kappa 1	GSTK1_MOUSE	0.481392	0.0699458	0.828815	7.16306e-05
Q8BH93	Mapk1ip1l	MAPK-interacting and spindle-stabilizing protein-like	MISSL_MOUSE	-0.426504	0.0699527	0.828815	2.46948e-05
Q8BH69	Sephs1	Selenide, water dikinase 1	SPS1_MOUSE	-0.378391	0.0703644	0.831238	1.42438e-05
Q3UH68	Limch1	LIM and calponin homology domains-containing protein 1	LIMC1_MOUSE	-0.322374	0.0704488	0.831238	2.15966e-05
O55137,O88267	Acot1	Acyl-coenzyme A thioesterase 1	ACOT1_MOUSE,ACOT1_RAT	0.160626	0.0706969	0.832442	0.000102959
Q9CQV4	Retreg3	Reticulophagy regulator 3	RETR3_MOUSE	-0.0998631	0.070991	0.834087	2.18304e-05
P62889	Rpl30	60S ribosomal protein L30	RL30_MOUSE	0.169008	0.0712231	0.834087	0.000150852
Q62384	Zpr1	Zinc finger protein ZPR1	ZPR1_MOUSE	-0.148412	0.0712757	0.834087	6.13636e-06
Q8VE70	Pdcd10	Programmed cell death protein 10	PDC10_MOUSE	-0.116253	0.0716329	0.835223	6.55425e-05
Q11011	Npepps	Puromycin-sensitive aminopeptidase	PSA_MOUSE	-0.0568477	0.0716659	0.835223	0.000468614
Q9CPR1	Rwdd4	RWD domain-containing protein 4	RWDD4_MOUSE	-0.300592	0.0719414	0.836722	9.91392e-06
Q9DCP2	Slc38a3	Sodium-coupled neutral amino acid transporter 3	S38A3_MOUSE	-0.222284	0.0722138	0.83818	0.000151969
Q3URE1	Acsf3	Malonate--CoA ligase ACSF3, mitochondrial	ACSF3_MOUSE	0.0956728	0.0725089	0.838269	4.13193e-05
Q9Z2U0	Psma7	Proteasome subunit alpha type-7	PSA7_MOUSE	-0.0786566	0.0725156	0.838269	0.00039149
Q8BL86	Mblac2	Metallo-beta-lactamase domain-containing protein 2	MBLC2_MOUSE	0.123358	0.0727519	0.839297	3.7776e-05
Q9CQU5	Zwint	ZW10 interactor	ZWINT_MOUSE	-0.501526	0.073073	0.839646	1.8391e-05
Q9CX30	Yif1b	Protein YIF1B	YIF1B_MOUSE	-0.089556	0.0730768	0.839646	1.587e-05
Q9WV69	Dmtn	Dematin	DEMA_MOUSE	-0.527311	0.0736087	0.840874	0.000311615
O35465	Fkbp8	Peptidyl-prolyl cis-trans isomerase FKBP8	FKBP8_MOUSE	-0.241414	0.0737075	0.840874	9.41226e-05
Q9QUM9	Psma6	Proteasome subunit alpha type-6	PSA6_MOUSE	-0.104523	0.0737378	0.840874	0.000199264
Q61191	Hcfc1	Host cell factor 1	HCFC1_MOUSE	-0.457424	0.0739925	0.840874	1.68187e-05
Q9DC33	Hmg20a	High mobility group protein 20A	HM20A_MOUSE	-2.18063	0.0740399	0.840874	4.80253e-06
P52479	Usp10	Ubiquitin carboxyl-terminal hydrolase 10	UBP10_MOUSE	-0.333433	0.0741675	0.840874	2.11915e-05
P56183	Rrp1	Ribosomal RNA processing protein 1 homolog A	RRP1_MOUSE	-0.569146	0.074406	0.840874	3.40845e-06
P63073	Eif4e	Eukaryotic translation initiation factor 4E	IF4E_MOUSE	-0.169192	0.0745451	0.840874	6.19111e-05
Q9JL35	Hmgn5	High mobility group nucleosome-binding domain-containing protein 5	HMGN5_MOUSE	-0.57312	0.0750675	0.840874	1.47648e-05
Q7TPH6	Mycbp2	E3 ubiquitin-protein ligase MYCBP2	MYCB2_MOUSE	0.104677	0.0751256	0.840874	1.0037e-05
Q9CX34	Sugt1	Protein SGT1 homolog	SGT1_MOUSE	-0.141046	0.0751728	0.840874	0.000128479
Q9DA69	Ift43	Intraflagellar transport protein 43 homolog	IFT43_MOUSE	-1.7582	0.0756513	0.840874	6.92541e-07
P45376	Akr1b1	Aldo-keto reductase family 1 member B1	ALDR_MOUSE	-0.0819625	0.075755	0.840874	0.000223242
Q8K3A0	Hscb	Iron-sulfur cluster co-chaperone protein HscB	HSC20_MOUSE	0.199009	0.0758603	0.840874	1.39307e-05
O08759	Ube3a	Ubiquitin-protein ligase E3A	UBE3A_MOUSE	-0.206145	0.0760048	0.840874	5.49719e-05
Q9WVS7	Map2k5	Dual specificity mitogen-activated protein kinase kinase 5	MP2K5_MOUSE	-0.447037	0.0760419	0.840874	3.33096e-06
Q6P542	Abcf1	ATP-binding cassette sub-family F member 1	ABCF1_MOUSE	-0.5389	0.0760458	0.840874	1.1453e-05
Q61337	Bad	Bcl2-associated agonist of cell death	BAD_MOUSE	-0.212969	0.0761644	0.840874	1.55835e-05
Q8BWU5	Osgep	Probable tRNA N6-adenosine threonylcarbamoyltransferase	OSGEP_MOUSE	-0.26144	0.0764754	0.840874	5.26634e-06
Q9R1V6	Adam22	Disintegrin and metalloproteinase domain-containing protein 22	ADA22_MOUSE	0.238342	0.0767027	0.840874	0.000353187
Q9DCH6	Zfand6	AN1-type zinc finger protein 6	ZFAN6_MOUSE	-0.458138	0.0768042	0.840874	2.52895e-06
Q80UM3	Naa15	N-alpha-acetyltransferase 15, NatA auxiliary subunit	NAA15_MOUSE	-0.0946281	0.076852	0.840874	3.8231e-05
P08775	Polr2a	DNA-directed RNA polymerase II subunit RPB1	RPB1_MOUSE	0.210811	0.0769199	0.840874	6.25242e-06
Q8BL48	Unk	RING finger protein unkempt homolog	UNK_MOUSE	-0.387206	0.0769462	0.840874	2.29694e-06
Q3UH99	Shisa6	Protein shisa-6	SHSA6_MOUSE	-1.83984	0.0771013	0.840874	1.25042e-06
O35685	Nudc	Nuclear migration protein nudC	NUDC_MOUSE	0.230465	0.077168	0.840874	0.0001202
Q99N96	Mrpl1	39S ribosomal protein L1, mitochondrial	RM01_MOUSE	-0.153815	0.0773293	0.840874	9.74025e-06
Q9CR27	Washc3	WASH complex subunit 3	WASC3_MOUSE	0.259154	0.0773367	0.840874	9.60063e-06
Q3UZ39	Lrrfip1	Leucine-rich repeat flightless-interacting protein 1	LRRF1_MOUSE	-0.177917	0.077566	0.840874	3.82937e-06
Q924S8	Spred1	Sprouty-related, EVH1 domain-containing protein 1	SPRE1_MOUSE	-0.250636	0.0776101	0.840874	1.85984e-05
Q91WE1	Snx15	Sorting nexin-15	SNX15_MOUSE	-0.200684	0.0780471	0.842978	1.14354e-05
Q9Z0N1	Eif2s3x	Eukaryotic translation initiation factor 2 subunit 3, X-linked	IF2G_MOUSE	-0.12967	0.0781001	0.842978	3.85099e-05
Q01853;P55072	Vcp;VCP	Transitional endoplasmic reticulum ATPase	TERA_MOUSE;TERA_HUMAN	-0.0897123	0.0789277	0.8503	0.000808133
Q8BQ47	Cnpy4	Protein canopy homolog 4	CNPY4_MOUSE	0.166684	0.0793552	0.851914	6.02448e-06
Q9CQR4	Acot13	Acyl-coenzyme A thioesterase 13	ACO13_MOUSE	0.18009	0.0793765	0.851914	0.000236622
Q7TQD2	Tppp	Tubulin polymerization-promoting protein	TPPP_MOUSE	-0.188832	0.0797764	0.854468	0.00128797
Q9D906	Atg7	Ubiquitin-like modifier-activating enzyme ATG7	ATG7_MOUSE	-0.0610164	0.0799255	0.854468	2.73726e-05
Q9CQN7	Mrpl41	39S ribosomal protein L41, mitochondrial	RM41_MOUSE	0.0979086	0.0803043	0.854468	1.32936e-05
Q810B6	Ankfy1	Rabankyrin-5	ANFY1_MOUSE	-0.104635	0.0805257	0.854468	2.34107e-05
Q9CRB9	Chchd3	MICOS complex subunit Mic19	MIC19_MOUSE	0.144829	0.0805285	0.854468	0.000443995
Q9Z2F7	Bnip3l	BCL2/adenovirus E1B 19 kDa protein-interacting protein 3-like	BNI3L_MOUSE	-0.242826	0.0806451	0.854468	3.69397e-05
Q8C854	Myef2	Myelin expression factor 2	MYEF2_MOUSE	-0.320053	0.0806639	0.854468	0.000129685
Q99JP4	Cdc26	Anaphase-promoting complex subunit CDC26	CDC26_MOUSE	-0.26556	0.0811495	0.858017	8.45522e-06
Q8K411	Pitrm1	Presequence protease, mitochondrial	PREP_MOUSE	0.126625	0.0814665	0.858036	2.98389e-05
Q8CCA0	Dcun1d4	DCN1-like protein 4	DCNL4_MOUSE	-0.299986	0.0817318	0.858036	3.819e-06
Q9CR21	Ndufab1	Acyl carrier protein, mitochondrial	ACPM_MOUSE	0.0578191	0.0817387	0.858036	0.000326402
Q9CX00	Ist1	IST1 homolog	IST1_MOUSE	-0.151119	0.0817535	0.858036	6.94649e-05
Q6P5H2	Nes	Nestin	NEST_MOUSE	-0.795554	0.0819936	0.858974	1.62504e-06
B1AR13	Cisd3	CDGSH iron-sulfur domain-containing protein 3, mitochondrial	CISD3_MOUSE	0.532009	0.0822452	0.860028	4.89001e-05
Q8C0I1	Agps	Alkyldihydroxyacetonephosphate synthase, peroxisomal	ADAS_MOUSE	0.323096	0.082604	0.860064	6.87925e-06
P46471	Psmc2	26S proteasome regulatory subunit 7	PRS7_MOUSE	-0.0970804	0.0826183	0.860064	0.000147007
Q99KN9	Clint1	Clathrin interactor 1	EPN4_MOUSE	-0.208228	0.0827013	0.860064	7.77609e-05
O88983	Stx8	Syntaxin-8	STX8_MOUSE	0.185075	0.0831278	0.861744	1.80798e-05
Q99L45	Eif2s2	Eukaryotic translation initiation factor 2 subunit 2	IF2B_MOUSE	-0.163271	0.0831653	0.861744	7.63353e-05
Q99NF3	Cep41	Centrosomal protein of 41 kDa	CEP41_MOUSE	-0.21555	0.0834478	0.861748	6.36254e-06
Q6PEV3	Wipf2	WAS/WASL-interacting protein family member 2	WIPF2_MOUSE	-0.178031	0.0834682	0.861748	4.76567e-05
Q9DCG9	Trmt112	Multifunctional methyltransferase subunit TRM112-like protein	TR112_MOUSE	-0.462381	0.0836805	0.862379	3.59686e-05
Q91VU0	Fam3c	Protein FAM3C	FAM3C_MOUSE	-0.264671	0.0839548	0.863348	1.69089e-05
Q9R020	Zranb2	Zinc finger Ran-binding domain-containing protein 2	ZRAB2_MOUSE	-0.429645	0.0841501	0.863348	1.88403e-05
Q9QZD9	Eif3i	Eukaryotic translation initiation factor 3 subunit I	EIF3I_MOUSE	-0.140584	0.0845044	0.863348	3.57308e-05
Q8BMA6	Srp68	Signal recognition particle subunit SRP68	SRP68_MOUSE	-0.221836	0.0846008	0.863348	2.18083e-05
P42703	Lifr	Leukemia inhibitory factor receptor	LIFR_MOUSE	-0.912198	0.0846227	0.863348	1.94746e-06
P24457	Cyp2d11	Cytochrome P450 2D11	CP2DB_MOUSE	0.258894	0.0846835	0.863348	2.58882e-05
P15379	Cd44	CD44 antigen	CD44_MOUSE	-0.367235	0.0850143	0.864679	1.37144e-05
Q9CQN6	Tmem14c	Transmembrane protein 14C	TM14C_MOUSE	-0.250665	0.0851662	0.864679	5.426e-05
Q91ZU6	Dst	Dystonin	DYST_MOUSE	0.523114	0.0854068	0.864679	0.000171835
Q9D3D9	Atp5f1d	ATP synthase subunit delta, mitochondrial	ATPD_MOUSE	0.154451	0.085421	0.864679	0.000940345
Q99JX7	Nxf1	Nuclear RNA export factor 1	NXF1_MOUSE	-0.414334	0.0862833	0.871859	2.77925e-06
Q9CQ71	Rpa3	Replication protein A 14 kDa subunit	RFA3_MOUSE	-0.130885	0.0868551	0.874818	8.77246e-06
Q80X85	Mrps7	28S ribosomal protein S7, mitochondrial	RT07_MOUSE	0.42719	0.0870242	0.874818	1.471e-05
Q9CR09	Ufc1	Ubiquitin-fold modifier-conjugating enzyme 1	UFC1_MOUSE	-0.11952	0.0870367	0.874818	0.000115055
P0C0A3	Chmp6	Charged multivesicular body protein 6	CHMP6_MOUSE	0.135598	0.0872128	0.875045	6.91367e-05
Q80T62	Gpr101	Probable G-protein coupled receptor 101	GP101_MOUSE	0.337891	0.0874406	0.875789	3.20698e-06
P62322	Lsm5	U6 snRNA-associated Sm-like protein LSm5	LSM5_MOUSE	-1.09514	0.0878573	0.876694	7.89199e-06
Q3UM29	Cog7	Conserved oligomeric Golgi complex subunit 7	COG7_MOUSE	-0.458999	0.087956	0.876694	7.70637e-06
Q9D6W8	Borcs6	BLOC-1-related complex subunit 6	BORC6_MOUSE	-0.232132	0.0880338	0.876694	5.603e-06
P17095	Hmga1	High mobility group protein HMG-I/HMG-Y	HMGA1_MOUSE	-0.284567	0.0881463	0.876694	6.14255e-05
P43274	Hist1h1e	Histone H1.4	H14_MOUSE	0.329972	0.0885226	0.877011	0.0011294
Q02384	Sos2	Son of sevenless homolog 2	SOS2_MOUSE	-0.461763	0.0886248	0.877011	2.75368e-06
Q7M759	Abhd17b	Alpha/beta hydrolase domain-containing protein 17B	AB17B_MOUSE	0.299021	0.0889623	0.877011	1.71359e-05
Q5IRJ6	Slc30a9	Zinc transporter 9	ZNT9_MOUSE	0.275115	0.0890638	0.877011	5.84458e-05
D3YV10	Ccdc13	Coiled-coil domain-containing protein 13	CCD13_MOUSE	-0.216515	0.0892716	0.877011	4.64768e-05
P49722	Psma2	Proteasome subunit alpha type-2	PSA2_MOUSE	0.301361	0.0893184	0.877011	0.000174813
Q3THW5;P0C0S6	H2afv;H2afz	Histone H2A.V;Histone H2A.Z	H2AV_MOUSE;H2AZ_MOUSE	0.147032	0.0893959	0.877011	0.00020505
O55029	Copb2	Coatomer subunit beta'	COPB2_MOUSE	-0.154097	0.0901362	0.877011	4.12041e-05
Q921H8	Acaa1a	3-ketoacyl-CoA thiolase A, peroxisomal	THIKA_MOUSE	0.12521	0.09032	0.877011	0.000109935
P70333	Hnrnph2	Heterogeneous nuclear ribonucleoprotein H2	HNRH2_MOUSE	-0.303207	0.0904629	0.877011	5.34126e-05
Q07235	Serpine2	Glia-derived nexin	GDN_MOUSE	-0.624152	0.0907774	0.877011	3.29524e-05
Q9D3L0	Fam174a	Membrane protein FAM174A	F174A_MOUSE	-0.428291	0.0907925	0.877011	3.77291e-06
Q3UVR3	Ttbk2	Tau-tubulin kinase 2	TTBK2_MOUSE	-0.544872	0.090872	0.877011	1.81643e-06
P52623	Uck1	Uridine-cytidine kinase 1	UCK1_MOUSE	-0.0730336	0.0910085	0.877011	1.88545e-05
Q99NB8	Ubqln4	Ubiquilin-4	UBQL4_MOUSE	-0.569118	0.0910548	0.877011	1.32039e-05
Q8BZH4	Pogz	Pogo transposable element with ZNF domain	POGZ_MOUSE	-1.35409	0.0910623	0.877011	1.41287e-06
Q6Y7W8	Gigyf2	GRB10-interacting GYF protein 2	GGYF2_MOUSE	-0.381144	0.0911165	0.877011	3.91912e-06
Q3URU2	Peg3	Paternally-expressed gene 3 protein	PEG3_MOUSE	-0.373755	0.0912156	0.877011	1.35423e-05
P62500	Tsc22d1	TSC22 domain family protein 1	T22D1_MOUSE	-0.308669	0.0912532	0.877011	7.72893e-05
Q9Z1T1	Ap3b1	AP-3 complex subunit beta-1	AP3B1_MOUSE	-0.34632	0.0912559	0.877011	1.29738e-05
P27641	Xrcc5	X-ray repair cross-complementing protein 5	XRCC5_MOUSE	-0.197016	0.0916993	0.879534	1.84785e-06
P47754	Capza2	F-actin-capping protein subunit alpha-2	CAZA2_MOUSE	-0.435499	0.0918271	0.879534	0.000393467
Q9D1E6	Tbcb	Tubulin-folding cofactor B	TBCB_MOUSE	-0.155316	0.0920519	0.880208	0.000159293
Q8BYM5	Nlgn3	Neuroligin-3	NLGN3_MOUSE	-0.587316	0.0924018	0.881642	5.44241e-05
Q641K1	Agtpbp1	Cytosolic carboxypeptidase 1	CBPC1_MOUSE	-0.146429	0.0928846	0.881642	4.06442e-06
Q9DCL8	Ppp1r2	Protein phosphatase inhibitor 2	IPP2_MOUSE	-0.509457	0.0931026	0.881642	0.000131975
Q9Z1Z2	Strap	Serine-threonine kinase receptor-associated protein	STRAP_MOUSE	-0.14491	0.0932957	0.881642	0.000111416
Q80YE4	Aatk	Serine/threonine-protein kinase LMTK1	LMTK1_MOUSE	-0.287252	0.093313	0.881642	5.98904e-06
P39688	Fyn	Tyrosine-protein kinase Fyn	FYN_MOUSE	0.0741996	0.0934662	0.881642	4.64757e-05
P20060	Hexb	Beta-hexosaminidase subunit beta	HEXB_MOUSE	-0.340823	0.0934845	0.881642	9.69405e-05
Q8K0H5	Taf10	Transcription initiation factor TFIID subunit 10	TAF10_MOUSE	-0.371185	0.0936384	0.881642	3.00765e-06
Q8CGC6	Rbm28	RNA-binding protein 28	RBM28_MOUSE	0.0887007	0.0936438	0.881642	4.57369e-06
Q91WV0	Dr1	Protein Dr1	NC2B_MOUSE	-0.237597	0.0939076	0.881642	1.42831e-05
Q9ERE9	Mapk8ip2	C-Jun-amino-terminal kinase-interacting protein 2	JIP2_MOUSE	-0.437819	0.0941599	0.881642	1.29338e-06
P21279	Gnaq	Guanine nucleotide-binding protein G(q) subunit alpha	GNAQ_MOUSE	0.0732377	0.0943247	0.881642	0.000350631
Q3TLH4	Prrc2c	Protein PRRC2C	PRC2C_MOUSE	-0.338793	0.0943491	0.881642	2.63938e-05
P48962	Slc25a4	ADP/ATP translocase 1	ADT1_MOUSE	0.0906911	0.0943677	0.881642	0.00465251
Q01147;P16220	Creb1;CREB1	Cyclic AMP-responsive element-binding protein 1	CREB1_MOUSE;CREB1_HUMAN	-0.659913	0.0945726	0.88211	9.75175e-06
Q8BGT5	Gpt2	Alanine aminotransferase 2	ALAT2_MOUSE	0.157144	0.0948755	0.883489	1.61202e-05
Q5GH64	Xkr7	XK-related protein 7	XKR7_MOUSE	-0.155272	0.0951501	0.884601	2.87893e-06
Q9D428	GOLGA7B	Golgin subfamily A member 7B	GOG7B_MOUSE	0.0829747	0.0953132	0.884674	1.55542e-05
Q8R3G1	Ppp1r8	Nuclear inhibitor of protein phosphatase 1	PP1R8_MOUSE	-0.489603	0.0955378	0.884686	7.17992e-06
P63143	Kcnab1	Voltage-gated potassium channel subunit beta-1	KCAB1_MOUSE	0.400413	0.0957992	0.884686	3.005e-05
Q66L44	Cbarp	Voltage-dependent calcium channel beta subunit-associated regulatory protein	CBARP_MOUSE	-0.398955	0.0960064	0.884686	3.74266e-05
Q5XPI3	Rnf123	E3 ubiquitin-protein ligase RNF123	RN123_MOUSE	-0.129412	0.0961763	0.884686	1.69371e-05
Q5SUC9	Sco1	Protein SCO1 homolog, mitochondrial	SCO1_MOUSE	0.0708942	0.0961962	0.884686	2.91708e-05
Q61142	Spin1	Spindlin-1	SPIN1_MOUSE	-0.685303	0.0964542	0.884686	3.91769e-06
Q9CQC8	Spg21	Maspardin	SPG21_MOUSE	-0.35099	0.0966451	0.884686	4.36118e-06
Q9D1I5	Mcee	Methylmalonyl-CoA epimerase, mitochondrial	MCEE_MOUSE	0.267922	0.0966486	0.884686	3.22141e-05
Q9D8N0	Eef1g	Elongation factor 1-gamma	EF1G_MOUSE	-0.268717	0.0967607	0.884686	0.000336558
Q8BGS7	Cept1	Choline/ethanolaminephosphotransferase 1	CEPT1_MOUSE	0.210774	0.0969478	0.884686	7.42357e-05
Q9CW03	Smc3	Structural maintenance of chromosomes protein 3	SMC3_MOUSE	-0.242068	0.0970221	0.884686	1.09114e-05
Q8BWY3;P62495	Etf1;ETF1	Eukaryotic peptide chain release factor subunit 1	ERF1_MOUSE;ERF1_HUMAN	-0.218394	0.0973661	0.885082	3.65954e-05
P54227	Stmn1	Stathmin	STMN1_MOUSE	-0.0634683	0.0975472	0.885082	0.000697691
Q9CQC6	Bzw1	Basic leucine zipper and W2 domain-containing protein 1	BZW1_MOUSE	-0.117769	0.0977506	0.885082	3.95529e-05
B2RUJ5	Apba1	Amyloid-beta A4 precursor protein-binding family A member 1	APBA1_MOUSE	-0.151588	0.0980261	0.885082	6.62947e-05
Q8BGC4	Zadh2	Prostaglandin reductase-3	PTGR3_MOUSE	-0.153886	0.0982273	0.885082	0.000190942
Q8C1Z7	Bbs4	Bardet-Biedl syndrome 4 protein homolog	BBS4_MOUSE	-0.134749	0.0983658	0.885082	9.57376e-06
Q8BWG8	Arrb1	Beta-arrestin-1	ARRB1_MOUSE	-0.170516	0.0984331	0.885082	7.70881e-05
Q8R317	Ubqln1	Ubiquilin-1	UBQL1_MOUSE	-0.273991	0.098436	0.885082	8.86659e-05
Q63135,Q64735	Cr1l	Complement component receptor 1-like protein	CR1L_RAT,CR1L_MOUSE	0.223769	0.0984668	0.885082	2.42808e-05
Q8R307	Vps18	Vacuolar protein sorting-associated protein 18 homolog	VPS18_MOUSE	0.177875	0.0986457	0.885082	3.88989e-05
Q5U3K5	Rabl6	Rab-like protein 6	RABL6_MOUSE	-0.210872	0.0989065	0.885082	8.43249e-05
P31230	Aimp1	Aminoacyl tRNA synthase complex-interacting multifunctional protein 1	AIMP1_MOUSE	-0.163894	0.0989934	0.885082	6.35331e-05
Q8BFP9	Pdk1	[Pyruvate dehydrogenase (acetyl-transferring)] kinase isozyme 1, mitochondrial	PDK1_MOUSE	0.297638	0.0990845	0.885082	9.3928e-05
Q8VCA8	Scrn2	Secernin-2	SCRN2_MOUSE	-0.292796	0.0994887	0.887302	1.51366e-05
P18652	RPS6KA	Ribosomal protein S6 kinase 2 alpha	KS6AA_CHICK	-0.111215	0.100119	0.891529	4.12139e-05
Q99LC3	Ndufa10	NADH dehydrogenase [ubiquinone] 1 alpha subcomplex subunit 10, mitochondrial	NDUAA_MOUSE	0.0842355	0.100351	0.891622	0.000500977
P61807	Snn	Stannin	SNN_MOUSE	-0.294703	0.100442	0.891622	1.2932e-05
Q925B0	Pawr	PRKC apoptosis WT1 regulator protein	PAWR_MOUSE	-0.413968	0.100831	0.893678	1.86261e-06
P70414	Slc8a1	Sodium/calcium exchanger 1	NAC1_MOUSE	0.236492	0.101131	0.894326	0.000144989
P70318	Tial1	Nucleolysin TIAR	TIAR_MOUSE	-0.300784	0.101218	0.894326	1.98122e-05
O88597	Becn1	Beclin-1	BECN1_MOUSE	0.32858	0.101817	0.898227	9.67103e-06
Q9Z0V1	Kcnd3	Potassium voltage-gated channel subfamily D member 3	KCND3_MOUSE	-0.905371	0.102373	0.900839	5.76541e-05
Q9JLC4	Sorcs1	VPS10 domain-containing receptor SorCS1	SORC1_MOUSE	-0.773639	0.102429	0.900839	2.56609e-06
Q9QUR6	Prep	Prolyl endopeptidase	PPCE_MOUSE	-0.160219	0.102881	0.903316	5.95348e-05
P34022	Ranbp1	Ran-specific GTPase-activating protein	RANG_MOUSE	-0.0977856	0.103159	0.903316	0.000227635
Q9CZX7	Pip4p2	Type 2 phosphatidylinositol 4,5-bisphosphate 4-phosphatase	PP4P2_MOUSE	-0.246772	0.103401	0.903316	1.70338e-05
Q8CIE6	Copa	Coatomer subunit alpha	COPA_MOUSE	-0.16308	0.103438	0.903316	6.84109e-05
Q6A009	Ltn1	E3 ubiquitin-protein ligase listerin	LTN1_MOUSE	-0.460822	0.103672	0.903316	1.53039e-06
A2ALU4	Shroom2	Protein Shroom2	SHRM2_MOUSE	-0.201674	0.103895	0.903316	5.57179e-05
E9QAT4	Sec16a	Protein transport protein Sec16A	SC16A_MOUSE	-0.359067	0.104041	0.903316	1.06437e-05
O08688	Capn5	Calpain-5	CAN5_MOUSE	0.163745	0.104067	0.903316	2.1838e-05
Q8BNW9	Kbtbd11	Kelch repeat and BTB domain-containing protein 11	KBTBB_MOUSE	-0.126703	0.104343	0.903316	0.000215398
Q9QZB7	Actr10	Actin-related protein 10	ARP10_MOUSE	0.165652	0.104436	0.903316	6.6107e-05
Q9DCT1	Akr1e2	1,5-anhydro-D-fructose reductase	AKCL2_MOUSE	-0.240972	0.104454	0.903316	3.07075e-05
Q9DBJ1	Pgam1	Phosphoglycerate mutase 1	PGAM1_MOUSE	-0.0321679	0.104772	0.904689	0.00189862
Q6PIC6	Atp1a3	Sodium/potassium-transporting ATPase subunit alpha-3	AT1A3_MOUSE	0.522615	0.105156	0.905539	0.00380309
Q9JLB0	Mpp6	MAGUK p55 subfamily member 6	MPP6_MOUSE	-0.158525	0.105188	0.905539	0.000180074
O70492	Snx3	Sorting nexin-3	SNX3_MOUSE	-0.198988	0.105461	0.906517	0.000139764
Q69Z98	Brsk2	Serine/threonine-protein kinase BRSK2	BRSK2_MOUSE	-0.166122	0.10564	0.906687	4.78553e-05
Q9WUL7	Arl3	ADP-ribosylation factor-like protein 3	ARL3_MOUSE	-0.108514	0.106394	0.9114	0.000147916
Q6PAJ1	Bcr	Breakpoint cluster region protein	BCR_MOUSE	-0.409892	0.106697	0.9114	0.000232971
P61202	Cops2	COP9 signalosome complex subunit 2	CSN2_MOUSE	-0.0621572	0.106844	0.9114	0.000115651
Q9EPV8	Ubl5	Ubiquitin-like protein 5	UBL5_MOUSE	-0.99846	0.107112	0.9114	6.66461e-05
Q9JMH6	Txnrd1	Thioredoxin reductase 1, cytoplasmic	TRXR1_MOUSE	-0.0543984	0.107113	0.9114	0.000118442
Q3UPL5	Ag2	Uncharacterized protein C11orf96 homolog	CK096_MOUSE	-1.31583	0.107148	0.9114	5.31502e-06
Q8BJW6	Eif2a	Eukaryotic translation initiation factor 2A	EIF2A_MOUSE	-0.132326	0.10752	0.913203	1.75609e-05
P70268	Pkn1	Serine/threonine-protein kinase N1	PKN1_MOUSE	-0.636356	0.108393	0.919247	6.02567e-06
Q9CQ13	Coprs	Coordinator of PRMT5 and differentiation stimulator	COPRS_MOUSE	-0.866916	0.108823	0.919387	3.33032e-06
Q8K4R4	Pitpnc1	Cytoplasmic phosphatidylinositol transfer protein 1	PITC1_MOUSE	-0.247597	0.108876	0.919387	6.17683e-05
Q9EQG9	Cert	Ceramide transfer protein	CERT_MOUSE	-0.156193	0.109169	0.919387	7.13965e-06
Q4U2R1	Herc2	E3 ubiquitin-protein ligase HERC2	HERC2_MOUSE	0.249878	0.109178	0.919387	3.48059e-06
Q9QXE0	Hacl1	2-hydroxyacyl-CoA lyase 1	HACL1_MOUSE	0.304906	0.109326	0.919387	2.69586e-06
P37039,P37040	Por	NADPH--cytochrome P450 reductase	NCPR_CAVPO,NCPR_MOUSE	0.222339	0.10943	0.919387	0.000156583
Q9WUQ2	Preb	Prolactin regulatory element-binding protein	PREB_MOUSE	0.163394	0.109539	0.919387	2.90012e-05
P28028	Braf	Serine/threonine-protein kinase B-raf	BRAF_MOUSE	-0.134118	0.109715	0.919494	5.71733e-05
Q9D824	Fip1l1	Pre-mRNA 3'-end-processing factor FIP1	FIP1_MOUSE	-0.482506	0.109918	0.919494	4.2129e-06
A9Z1V5	Vwa5b1	von Willebrand factor A domain-containing protein 5B1	VW5B1_MOUSE	-0.211978	0.110036	0.919494	3.12424e-06
Q8C0C7	Farsa	Phenylalanine--tRNA ligase alpha subunit	SYFA_MOUSE	-0.438209	0.110208	0.919584	4.20583e-05
Q9WUR2	Eci2	Enoyl-CoA delta isomerase 2, mitochondrial	ECI2_MOUSE	0.283464	0.110664	0.920383	7.43158e-05
Q80W21	Gstm7	Glutathione S-transferase Mu 7	GSTM7_MOUSE	0.304997	0.110878	0.920383	0.000657918
Q61823	Pdcd4	Programmed cell death protein 4	PDCD4_MOUSE	-0.194155	0.111113	0.920383	0.000134866
Q9D020	Nt5c3a	Cytosolic 5'-nucleotidase 3A	5NT3A_MOUSE	-0.125478	0.111131	0.920383	1.84679e-05
O89017,Q9R0J8	Lgmn	Legumain	LGMN_MOUSE,LGMN_RAT	-0.366205	0.11126	0.920383	1.01517e-05
Q6PD21	Shb	SH2 domain-containing adapter protein B	SHB_MOUSE	-0.532485	0.111273	0.920383	3.32494e-06
O08599	Stxbp1	Syntaxin-binding protein 1	STXB1_MOUSE	0.163243	0.111654	0.92126	0.00316966
P60766;P60953,Q90694	Cdc42;CDC42,CDC42	Cell division control protein 42 homolog	CDC42_MOUSE;CDC42_HUMAN,CDC42_CHICK	0.143615	0.111722	0.92126	0.000367742
O88738	Birc6	Baculoviral IAP repeat-containing protein 6	BIRC6_MOUSE	-0.0918296	0.111866	0.92126	7.32767e-06
Q61171	Prdx2	Peroxiredoxin-2	PRDX2_MOUSE	0.237105	0.112026	0.92126	0.000785265
Q99MD9	Nasp	Nuclear autoantigenic sperm protein	NASP_MOUSE	-0.348084	0.112311	0.922276	4.22798e-06
P54823	Ddx6	Probable ATP-dependent RNA helicase DDX6	DDX6_MOUSE	-0.310787	0.112517	0.922636	6.78643e-05
Q9R0H2	Emcn	Endomucin	MUCEN_MOUSE	-0.902853	0.112776	0.923436	1.38745e-06
Q9CQ20	Mid1ip1	Mid1-interacting protein 1	M1IP1_MOUSE	-0.867197	0.113683	0.928199	6.13715e-06
O35864	Cops5	COP9 signalosome complex subunit 5	CSN5_MOUSE	-0.210007	0.113684	0.928199	0.000136489
Q80TN5	Zdhhc17	Palmitoyltransferase ZDHHC17	ZDH17_MOUSE	0.162494	0.114263	0.93068	1.95748e-05
Q9CQ25	Mzt2	Mitotic-spindle organizing protein 2	MZT2_MOUSE	-0.456977	0.114328	0.93068	2.5235e-06
P48024	Eif1	Eukaryotic translation initiation factor 1	EIF1_MOUSE	-0.335554	0.114477	0.93068	1.42494e-05
Q9Z1N5	Ddx39b	Spliceosome RNA helicase Ddx39b	DX39B_MOUSE	-0.405159	0.114647	0.930733	0.00014332
A2AJI0	Map7d1	MAP7 domain-containing protein 1	MA7D1_MOUSE	-0.213282	0.114859	0.931126	8.69262e-05
Q9D6S7	Mrrf	Ribosome-recycling factor, mitochondrial	RRFM_MOUSE	0.365319	0.115025	0.931148	5.67398e-05
Q8BP27	Sfr1	Swi5-dependent recombination DNA repair protein 1 homolog	SFR1_MOUSE	-0.525298	0.115385	0.932068	3.81475e-06
P10637	Mapt	Microtubule-associated protein tau	TAU_MOUSE	-0.065003	0.115511	0.932068	0.00172736
Q6PDI5	Ecpas	Proteasome adapter and scaffold protein ECM29	ECM29_MOUSE	-0.120589	0.115629	0.932068	2.49195e-05
P26350	Ptma	Prothymosin alpha	PTMA_MOUSE	-0.280286	0.116083	0.934406	0.000219283
A2AHC3	Camsap1	Calmodulin-regulated spectrin-associated protein 1	CAMP1_MOUSE	-0.299613	0.11657	0.936307	1.52507e-05
O35643	Ap1b1	AP-1 complex subunit beta-1	AP1B1_MOUSE	-0.102307	0.116769	0.936307	0.000318062
O08795	Prkcsh	Glucosidase 2 subunit beta	GLU2B_MOUSE	0.139654	0.116812	0.936307	0.000201215
Q8K070	Samd14	Sterile alpha motif domain-containing protein 14	SAM14_MOUSE	-0.472902	0.117207	0.936335	8.58317e-06
Q9Z210	Pex11b	Peroxisomal membrane protein 11B	PX11B_MOUSE	0.558104	0.117304	0.936335	5.28961e-06
P61924	Copz1	Coatomer subunit zeta-1	COPZ1_MOUSE	-0.751458	0.117649	0.936335	4.89623e-05
Q924T7	Rnf31	E3 ubiquitin-protein ligase RNF31	RNF31_MOUSE	-0.168481	0.117693	0.936335	6.95854e-06
P03888	Mtnd1	NADH-ubiquinone oxidoreductase chain 1	NU1M_MOUSE	-0.255561	0.118064	0.936335	0.00023475
Q9CZU6	Cs	Citrate synthase, mitochondrial	CISY_MOUSE	0.451526	0.118122	0.936335	0.00135757
D3YZP9	Ccdc6	Coiled-coil domain-containing protein 6	CCDC6_MOUSE	0.218482	0.118174	0.936335	5.39954e-05
P42337	Pik3ca	Phosphatidylinositol 4,5-bisphosphate 3-kinase catalytic subunit alpha isoform	PK3CA_MOUSE	-0.0794745	0.118186	0.936335	5.61648e-06
Q99N28	Cadm3	Cell adhesion molecule 3	CADM3_MOUSE	0.0975837	0.118403	0.936335	0.000628819
Q9R1T2	Sae1	SUMO-activating enzyme subunit 1	SAE1_MOUSE	-0.53732	0.118459	0.936335	3.58108e-05
P07903	Ercc1	DNA excision repair protein ERCC-1	ERCC1_MOUSE	-0.344928	0.11865	0.936548	1.45685e-06
Q8VD33	Sgtb	Small glutamine-rich tetratricopeptide repeat-containing protein beta	SGTB_MOUSE	-0.156634	0.119048	0.937395	9.83162e-05
Q7TSG2	Ctdp1	RNA polymerase II subunit A C-terminal domain phosphatase	CTDP1_MOUSE	-0.334089	0.119087	0.937395	1.81078e-06
P54754	Ephb3	Ephrin type-B receptor 3	EPHB3_MOUSE	-0.268429	0.119612	0.939371	2.8425e-06
Q9D1M4	Eef1e1	Eukaryotic translation elongation factor 1 epsilon-1	MCA3_MOUSE	-0.0947597	0.119698	0.939371	9.17483e-06
P24668	M6pr	Cation-dependent mannose-6-phosphate receptor	MPRD_MOUSE	0.0685781	0.119983	0.939371	0.000115887
Q8R086	Suox	Sulfite oxidase, mitochondrial	SUOX_MOUSE	0.171962	0.119997	0.939371	2.50639e-05
O35710	Noct	Nocturnin	NOCT_MOUSE	0.166763	0.120885	0.944552	8.59355e-06
Q6PGH0	Ubtd2	Ubiquitin domain-containing protein 2	UBTD2_MOUSE	0.236599	0.12099	0.944552	1.37587e-05
P70425	Rit2	GTP-binding protein Rit2	RIT2_MOUSE	-0.267578	0.121223	0.945075	2.32454e-05
Q8R349	Cdc16	Cell division cycle protein 16 homolog	CDC16_MOUSE	-0.240234	0.121645	0.945974	1.17721e-05
Q9WTR6	Slc7a11	Cystine/glutamate transporter	XCT_MOUSE	-0.37799	0.12167	0.945974	1.62406e-05
A2AGL3	Ryr3	Ryanodine receptor 3	RYR3_MOUSE	0.937604	0.121973	0.94659	8.05189e-07
Q80TM9	Nisch	Nischarin	NISCH_MOUSE	-0.109598	0.122082	0.94659	4.88773e-05
Q91YI1	Atg13	Autophagy-related protein 13	ATG13_MOUSE	-0.130646	0.122317	0.947126	9.74558e-06
O35593	Psmd14	26S proteasome non-ATPase regulatory subunit 14	PSDE_MOUSE	-0.121938	0.122923	0.947195	0.000117568
Q8BH59	Slc25a12	Calcium-binding mitochondrial carrier protein Aralar1	CMC1_MOUSE	0.163816	0.122928	0.947195	0.00106682
P62257	Ube2h	Ubiquitin-conjugating enzyme E2 H	UBE2H_MOUSE	-0.156809	0.123126	0.947195	1.65269e-05
Q61037	Tsc2	Tuberin	TSC2_MOUSE	-0.0875011	0.123357	0.947195	2.61471e-05
Q8CH77	Nav1	Neuron navigator 1	NAV1_MOUSE	0.27521	0.124136	0.947195	5.87249e-06
Q8K245	Uvrag	UV radiation resistance-associated protein	UVRAG_MOUSE	0.152034	0.124211	0.947195	3.48957e-06
Q45VK7,Q9JJ79	Dync2h1	Cytoplasmic dynein 2 heavy chain 1	DYHC2_MOUSE,DYHC2_RAT	-0.147376	0.12435	0.947195	3.00563e-06
Q9DCA7	Caly	Neuron-specific vesicular protein calcyon	CALY_MOUSE	-0.124725	0.124563	0.947195	8.25215e-06
Q6URW6	Myh14	Myosin-14	MYH14_MOUSE	-0.313235	0.124802	0.947195	6.76289e-05
Q9R0M0	Celsr2	Cadherin EGF LAG seven-pass G-type receptor 2	CELR2_MOUSE	-0.372748	0.125198	0.947195	6.74111e-06
Q62193	Rpa2	Replication protein A 32 kDa subunit	RFA2_MOUSE	-0.473929	0.125293	0.947195	6.85714e-06
Q6P4T1	Snx19	Sorting nexin-19	SNX19_MOUSE	-0.120917	0.125568	0.947195	8.24123e-06
Q7TQH0	Atxn2l	Ataxin-2-like protein	ATX2L_MOUSE	-0.233103	0.125658	0.947195	3.90358e-05
Q91WU5	As3mt	Arsenite methyltransferase	AS3MT_MOUSE	0.57613	0.125694	0.947195	0.00110859
Q9DAR7	Dcps	m7GpppX diphosphatase	DCPS_MOUSE	-0.227199	0.12579	0.947195	4.34863e-05
Q80U72	Scrib	Protein scribble homolog	SCRIB_MOUSE	-0.313659	0.125965	0.947195	4.77017e-06
Q9CQ79	Txndc9	Thioredoxin domain-containing protein 9	TXND9_MOUSE	-0.288964	0.126117	0.947195	1.33404e-05
Q91VJ5	Pqbp1	Polyglutamine-binding protein 1	PQBP1_MOUSE	-0.442319	0.12627	0.947195	1.1506e-05
P35290	Rab24	Ras-related protein Rab-24	RAB24_MOUSE	0.104306	0.126443	0.947195	2.20018e-05
P83917	Cbx1	Chromobox protein homolog 1	CBX1_MOUSE	-0.367821	0.126659	0.947195	1.79427e-05
P62331	Arf6	ADP-ribosylation factor 6	ARF6_MOUSE	-0.254553	0.126724	0.947195	3.45848e-05
Q8BPB0	Mob1b	MOB kinase activator 1B	MOB1B_MOUSE	-0.133701	0.126773	0.947195	9.4744e-06
P63325	Rps10	40S ribosomal protein S10	RS10_MOUSE	-0.142292	0.127047	0.947195	0.000186427
O88939	Zbtb7a	Zinc finger and BTB domain-containing protein 7A	ZBT7A_MOUSE	-0.437241	0.127188	0.947195	4.76351e-06
P70245	Ebp	3-beta-hydroxysteroid-Delta(8),Delta(7)-isomerase	EBP_MOUSE	0.270756	0.127355	0.947195	1.46777e-05
Q6NS82	Retreg2	Reticulophagy regulator 2	RETR2_MOUSE	-0.175522	0.127567	0.947195	3.26811e-05
O35495	Cdk14	Cyclin-dependent kinase 14	CDK14_MOUSE	-0.32083	0.127615	0.947195	1.39533e-05
P51881	Slc25a5	ADP/ATP translocase 2	ADT2_MOUSE	0.136819	0.127667	0.947195	0.00441599
Q7M729	Scn4b	Sodium channel subunit beta-4	SCN4B_MOUSE	0.195214	0.127744	0.947195	0.000190844
P59913	Pcmtd1	Protein-L-isoaspartate O-methyltransferase domain-containing protein 1	PCMD1_MOUSE	-0.155257	0.128344	0.947195	1.2675e-05
Q9R013	Ctsf	Cathepsin F	CATF_MOUSE	-0.400813	0.12886	0.947195	2.0908e-05
Q9DB15	Mrpl12	39S ribosomal protein L12, mitochondrial	RM12_MOUSE	0.0638912	0.128899	0.947195	0.000208439
Q62245	Sos1	Son of sevenless homolog 1	SOS1_MOUSE	0.075092	0.129066	0.947195	4.66035e-05
Q8BYH7	Tbc1d17	TBC1 domain family member 17	TBC17_MOUSE	-0.0777646	0.129076	0.947195	4.29705e-05
Q921I9	Exosc4	Exosome complex component RRP41	EXOS4_MOUSE	-0.186458	0.129329	0.947195	6.70368e-06
Q6PGB6	Naa50	N-alpha-acetyltransferase 50	NAA50_MOUSE	-0.229484	0.129593	0.947195	1.43189e-05
Q99MP8	Brap	BRCA1-associated protein	BRAP_MOUSE	-0.17489	0.129625	0.947195	3.05702e-06
Q9CQ88	Tspan31	Tetraspanin-31	TSN31_MOUSE	0.346849	0.129696	0.947195	4.77234e-06
Q69ZS7	Hbs1l	HBS1-like protein	HBS1L_MOUSE	-0.0787523	0.129966	0.947195	1.12551e-05
P01117	K-RAS	GTPase KRas	RASK_MSVKI	0.32456	0.12997	0.947195	9.16286e-05
P53702	Hccs	Cytochrome c-type heme lyase	CCHL_MOUSE	0.0471755	0.130034	0.947195	4.13181e-05
Q9ESZ8	Gtf2i	General transcription factor II-I	GTF2I_MOUSE	-0.28158	0.130099	0.947195	1.88843e-05
Q9DBP5	Cmpk1	UMP-CMP kinase	KCY_MOUSE	-0.108224	0.130408	0.947195	0.000321717
Q9JJL8	Sars2	Serine--tRNA ligase, mitochondrial	SYSM_MOUSE	0.105427	0.130562	0.947195	1.30027e-05
Q8BV13	Cops7b	COP9 signalosome complex subunit 7b	CSN7B_MOUSE	-0.171826	0.130621	0.947195	2.29537e-05
Q8VD63	Tspyl4	Testis-specific Y-encoded-like protein 4	TSYL4_MOUSE	-0.567059	0.130647	0.947195	9.4336e-06
P46414	Cdkn1b	Cyclin-dependent kinase inhibitor 1B	CDN1B_MOUSE	-0.27093	0.130714	0.947195	1.07804e-05
Q8C2Q3	Rbm14	RNA-binding protein 14	RBM14_MOUSE	-0.665357	0.131019	0.947195	4.7959e-05
Q9WU42	Ncor2	Nuclear receptor corepressor 2	NCOR2_MOUSE	-0.999902	0.131031	0.947195	1.43753e-06
Q8VHG2	Amot	Angiomotin	AMOT_MOUSE	-0.267714	0.131066	0.947195	2.99519e-06
Q62417	Sorbs1	Sorbin and SH3 domain-containing protein 1	SRBS1_MOUSE	-0.269688	0.131336	0.947195	7.83943e-05
P03893	Mtnd2	NADH-ubiquinone oxidoreductase chain 2	NU2M_MOUSE	-0.463903	0.131412	0.947195	1.06984e-05
P29387	Gnb4	Guanine nucleotide-binding protein subunit beta-4	GBB4_MOUSE	0.911328	0.131639	0.947195	0.000251403
B1AY10	Nfx1	Transcriptional repressor NF-X1	NFX1_MOUSE	-0.868737	0.131906	0.947195	8.37875e-07
Q08890	Ids	Iduronate 2-sulfatase	IDS_MOUSE	-0.512152	0.131982	0.947195	3.93357e-06
O88351	Ikbkb	Inhibitor of nuclear factor kappa-B kinase subunit beta	IKKB_MOUSE	-0.71182	0.132105	0.947195	1.40567e-06
Q9Z0H8	Clip2	CAP-Gly domain-containing linker protein 2	CLIP2_MOUSE	-0.0796559	0.132365	0.947195	8.04856e-05
Q6PDC0	Rundc3b	RUN domain-containing protein 3B	RUN3B_MOUSE	-0.113194	0.13254	0.947195	8.98412e-06
Q8BPG6	Sumf2	Inactive C-alpha-formylglycine-generating enzyme 2	SUMF2_MOUSE	0.247789	0.132552	0.947195	2.82436e-06
E9Q634;P70248	Myo1e;Myo1f	Unconventional myosin-Ie;Unconventional myosin-If	MYO1E_MOUSE;MYO1F_MOUSE	0.30104	0.132785	0.947195	5.79643e-06
Q9JMA2	Qtrt1	Queuine tRNA-ribosyltransferase catalytic subunit 1	TGT_MOUSE	-0.153305	0.132885	0.947195	0.000107311
Q80VL1	Tdrkh	Tudor and KH domain-containing protein	TDRKH_MOUSE	-0.070173	0.132897	0.947195	3.00068e-05
Q08288	Lyar	Cell growth-regulating nucleolar protein	LYAR_MOUSE	0.584081	0.132956	0.947195	2.13935e-06
Q5SUR0	Pfas	Phosphoribosylformylglycinamidine synthase	PUR4_MOUSE	-0.216265	0.132963	0.947195	2.93713e-05
Q9CPX8	Uqcr11	Cytochrome b-c1 complex subunit 10	QCR10_MOUSE	-0.335168	0.133301	0.948418	9.00031e-05
Q3TL44	Nlrx1	NLR family member X1	NLRX1_MOUSE	0.605417	0.133829	0.948425	3.64997e-05
Q9ERA0	Tfcp2	Alpha-globin transcription factor CP2	TFCP2_MOUSE	-0.184578	0.133923	0.948425	1.00788e-05
Q99LP6	Grpel1	GrpE protein homolog 1, mitochondrial	GRPE1_MOUSE	0.0852136	0.133938	0.948425	0.000114103
P53994	Rab2a	Ras-related protein Rab-2A	RAB2A_MOUSE	-0.156657	0.134193	0.948425	0.000329671
Q8BVL3	Snx17	Sorting nexin-17	SNX17_MOUSE	-0.228891	0.134265	0.948425	2.00348e-05
O55028	Bckdk	[3-methyl-2-oxobutanoate dehydrogenase [lipoamide]] kinase, mitochondrial	BCKD_MOUSE	0.0976559	0.134301	0.948425	2.18027e-05
P43276	Hist1h1b	Histone H1.5	H15_MOUSE	0.314254	0.134768	0.950549	0.000106031
Q8K4Q0	Rptor	Regulatory-associated protein of mTOR	RPTOR_MOUSE	-0.108975	0.135734	0.954857	5.44152e-05
P05202	Got2	Aspartate aminotransferase, mitochondrial	AATM_MOUSE	0.128898	0.136557	0.954857	0.00375316
Q80UK0	Sestd1	SEC14 domain and spectrin repeat-containing protein 1	SESD1_MOUSE	-0.516864	0.136582	0.954857	9.46753e-06
O55201	Supt5h	Transcription elongation factor SPT5	SPT5H_MOUSE	-0.519571	0.136906	0.954857	8.20465e-06
O88545	Cops6	COP9 signalosome complex subunit 6	CSN6_MOUSE	-0.102463	0.137517	0.954857	0.000121959
Q9JHS4;O76031	Clpx;CLPX	ATP-dependent Clp protease ATP-binding subunit clpX-like, mitochondrial;ATP-dependent Clp protease ATP-binding subunit clpX-like, mitochondrial	CLPX_MOUSE;CLPX_HUMAN	0.076809	0.137572	0.954857	7.90633e-06
G3X9J0	Sipa1l3	Signal-induced proliferation-associated 1-like protein 3	SI1L3_MOUSE	-0.759493	0.138195	0.954857	3.41127e-06
Q91Z61	Diras1	GTP-binding protein Di-Ras1	DIRA1_MOUSE	-0.236892	0.138402	0.954857	3.11563e-05
Q62348	Tsn	Translin	TSN_MOUSE	-0.179326	0.138525	0.954857	9.72361e-05
Q8CEI1	Bola3	BolA-like protein 3	BOLA3_MOUSE	0.372534	0.138544	0.954857	1.20511e-05
P61290	Psme3	Proteasome activator complex subunit 3	PSME3_MOUSE	-0.368873	0.138672	0.954857	8.42013e-06
Q08509	Eps8	Epidermal growth factor receptor kinase substrate 8	EPS8_MOUSE	-0.602819	0.138771	0.954857	7.56704e-06
Q3TCJ1	Abraxas2	BRISC complex subunit Abraxas 2	ABRX2_MOUSE	-0.239927	0.138953	0.954857	2.57649e-05
P70362	Ufd1	Ubiquitin recognition factor in ER-associated degradation protein 1	UFD1_MOUSE	-0.19872	0.138966	0.954857	3.43482e-05
Q91VD9	Ndufs1	NADH-ubiquinone oxidoreductase 75 kDa subunit, mitochondrial	NDUS1_MOUSE	0.0570829	0.139247	0.954857	0.00107193
O54984	Asna1	ATPase Asna1	ASNA_MOUSE	-0.0502716	0.139281	0.954857	0.00022797
Q3UN16	Gpr162	Probable G-protein coupled receptor 162	GP162_MOUSE	-0.314593	0.139296	0.954857	7.11042e-06
Q91W96	Anapc4	Anaphase-promoting complex subunit 4	APC4_MOUSE	-0.175012	0.139522	0.954857	7.1689e-06
O35841	Api5	Apoptosis inhibitor 5	API5_MOUSE	-0.373817	0.139612	0.954857	3.72348e-05
Q9JJV2	Pfn2	Profilin-2	PROF2_MOUSE	-0.101767	0.139939	0.954857	0.000906961
Q58A65	Spag9	C-Jun-amino-terminal kinase-interacting protein 4	JIP4_MOUSE	-0.217456	0.140143	0.954857	3.57919e-05
Q9JLI8	Sart3	Squamous cell carcinoma antigen recognized by T-cells 3	SART3_MOUSE	-0.311957	0.140236	0.954857	2.17484e-05
Q9ERT9	Ppp1r1a	Protein phosphatase 1 regulatory subunit 1A	PPR1A_MOUSE	-0.51753	0.140424	0.954857	0.000110098
O54962	Banf1	Barrier-to-autointegration factor	BAF_MOUSE	-0.145215	0.140456	0.954857	9.39282e-05
P63001	Rac1	Ras-related C3 botulinum toxin substrate 1	RAC1_MOUSE	0.261502	0.14053	0.954857	0.000430662
Q6A068,O08837	Cdc5l	Cell division cycle 5-like protein	CDC5L_MOUSE,CDC5L_RAT	-0.42117	0.14059	0.954857	1.81166e-05
Q8VD57	Sft2d2	Vesicle transport protein SFT2B	SFT2B_MOUSE	0.222523	0.141018	0.954857	5.60645e-05
Q91YR1	Twf1	Twinfilin-1	TWF1_MOUSE	-0.137538	0.141317	0.954857	8.67455e-05
Q3UE37	Ube2z	Ubiquitin-conjugating enzyme E2 Z	UBE2Z_MOUSE	0.13297	0.141374	0.954857	4.97862e-05
P58742	Aaas	Aladin	AAAS_MOUSE	-0.81987	0.141434	0.954857	2.97109e-06
O35681	Syt3	Synaptotagmin-3	SYT3_MOUSE	0.250479	0.141443	0.954857	4.32978e-05
Q9DBG6	Rpn2	Dolichyl-diphosphooligosaccharide--protein glycosyltransferase subunit 2	RPN2_MOUSE	-0.298883	0.141534	0.954857	8.12656e-05
Q9JLT4	Txnrd2	Thioredoxin reductase 2, mitochondrial	TRXR2_MOUSE	0.199814	0.141644	0.954857	4.26981e-05
Q920B9	Supt16h	FACT complex subunit SPT16	SP16H_MOUSE	-0.273891	0.141651	0.954857	1.76164e-05
Q99P31	Hspbp1	Hsp70-binding protein 1	HPBP1_MOUSE	-0.307875	0.141901	0.954857	1.34637e-05
P63115	Slc7a10	Asc-type amino acid transporter 1	AAA1_MOUSE	0.770506	0.14192	0.954857	4.37334e-05
Q9DAU1	Cnpy3	Protein canopy homolog 3	CNPY3_MOUSE	0.137439	0.141977	0.954857	1.58824e-05
Q8VDK1	Nit1	Deaminated glutathione amidase	NIT1_MOUSE	0.174902	0.1421	0.954857	7.0957e-05
Q6PDS3	Sarm1	Sterile alpha and TIR motif-containing protein 1	SARM1_MOUSE	-0.23115	0.142214	0.954857	2.44276e-05
P45481	Crebbp	CREB-binding protein	CBP_MOUSE	-0.552875	0.142346	0.954857	1.29767e-06
Q8CC86	Naprt	Nicotinate phosphoribosyltransferase	PNCB_MOUSE	0.148876	0.142512	0.954857	7.3303e-06
Q9WUA6	Akt3	RAC-gamma serine/threonine-protein kinase	AKT3_MOUSE	-0.185902	0.142603	0.954857	1.78281e-05
Q9JMB0	Gkap1	G kinase-anchoring protein 1	GKAP1_MOUSE	-0.88163	0.143106	0.954857	2.69442e-06
O88845	Akap10	A-kinase anchor protein 10, mitochondrial	AKA10_MOUSE	-0.138669	0.143207	0.954857	2.07094e-05
Q8BHS3	Rbm22	Pre-mRNA-splicing factor RBM22	RBM22_MOUSE	-0.364324	0.143294	0.954857	3.50628e-06
Q80TL0	Ppm1e	Protein phosphatase 1E	PPM1E_MOUSE	-0.125232	0.143421	0.954857	6.90428e-05
Q9D0M5	Dynll2	Dynein light chain 2, cytoplasmic	DYL2_MOUSE	-0.0795803	0.143653	0.954857	0.000505699
Q91Z31	Ptbp2	Polypyrimidine tract-binding protein 2	PTBP2_MOUSE	-0.452109	0.143698	0.954857	5.09387e-05
P62313	Lsm6	U6 snRNA-associated Sm-like protein LSm6	LSM6_MOUSE	-0.138492	0.144304	0.954857	4.79946e-05
O88271	Cfdp1	Craniofacial development protein 1	CFDP1_MOUSE	-0.430903	0.144348	0.954857	1.78087e-05
Q80U78	Pum1	Pumilio homolog 1	PUM1_MOUSE	-0.784024	0.144738	0.954857	4.61555e-06
Q9R060	Nubp1	Cytosolic Fe-S cluster assembly factor NUBP1	NUBP1_MOUSE	-0.154195	0.14497	0.954857	6.8263e-06
Q9CZT8	Rab3b	Ras-related protein Rab-3B	RAB3B_MOUSE	0.193372	0.145114	0.954857	8.07494e-05
Q8CBH5	Mfsd6	Major facilitator superfamily domain-containing protein 6	MFSD6_MOUSE	-0.291552	0.145227	0.954857	1.76176e-05
A2AHL1	Ano3	Anoctamin-3	ANO3_MOUSE	0.48631	0.145486	0.954857	6.72906e-06
Q8VEE4	Rpa1	Replication protein A 70 kDa DNA-binding subunit	RFA1_MOUSE	-0.232704	0.145556	0.954857	6.58597e-06
O88735	Map7	Ensconsin	MAP7_MOUSE	-0.57967	0.145941	0.954857	3.35012e-05
Q99NH0	Ankrd17	Ankyrin repeat domain-containing protein 17	ANR17_MOUSE	-0.302641	0.145988	0.954857	4.87563e-06
Q9CPZ6	Ormdl3	ORM1-like protein 3	ORML3_MOUSE	0.130622	0.146096	0.954857	5.29923e-06
Q8K2V6	Ipo11	Importin-11	IPO11_MOUSE	-0.293191	0.146198	0.954857	6.6929e-06
Q61743	Kcnj11	ATP-sensitive inward rectifier potassium channel 11	KCJ11_MOUSE	-0.322085	0.146213	0.954857	7.97425e-06
P35585	Ap1m1	AP-1 complex subunit mu-1	AP1M1_MOUSE	-0.134306	0.146376	0.954857	8.43472e-05
Q62507;O43405	Coch;COCH	Cochlin	COCH_MOUSE;COCH_HUMAN	-0.216685	0.146562	0.954857	1.20727e-05
Q8K1J6	Trnt1	CCA tRNA nucleotidyltransferase 1, mitochondrial	TRNT1_MOUSE	-0.12572	0.146643	0.954857	4.04799e-05
Q02105	C1qc	Complement C1q subcomponent subunit C	C1QC_MOUSE	-0.135907	0.147141	0.954857	6.6502e-05
Q91XY4	Pcdhga4	Protocadherin gamma-A4	PCDG4_MOUSE	-0.739984	0.14727	0.954857	2.27292e-05
Q5PR69	Crad	Cancer-related regulator of actin dynamics	CRAD_MOUSE	-0.474645	0.147728	0.954857	8.69864e-06
Q8BUR9	Mzt1	Mitotic-spindle organizing protein 1	MZT1_MOUSE	-0.106862	0.147789	0.954857	8.21787e-06
P08556	Nras	GTPase NRas	RASN_MOUSE	0.117705	0.14828	0.954857	0.000159143
Q80XI3	Eif4g3	Eukaryotic translation initiation factor 4 gamma 3	IF4G3_MOUSE	-0.214475	0.148332	0.954857	2.78026e-05
P21550	Eno3	Beta-enolase	ENOB_MOUSE	0.0841159	0.148425	0.954857	0.00149863
Q91XI1	Dus3l	tRNA-dihydrouridine(47) synthase [NAD(P)(+)]-like	DUS3L_MOUSE	-0.125187	0.148533	0.954857	6.77673e-06
Q7TPG7	Tafa2	Chemokine-like protein TAFA-2	TAFA2_MOUSE	-1.18669	0.148556	0.954857	3.30664e-06
Q9DCR2	Ap3s1	AP-3 complex subunit sigma-1	AP3S1_MOUSE	0.269088	0.14911	0.954857	8.58925e-05
Q8BMB3	Eif4e2	Eukaryotic translation initiation factor 4E type 2	IF4E2_MOUSE	0.511345	0.149306	0.954857	4.4688e-06
Q61166	Mapre1	Microtubule-associated protein RP/EB family member 1	MARE1_MOUSE	-0.110537	0.149321	0.954857	0.000131035
Q8CI33	Cwf19l1	CWF19-like protein 1	C19L1_MOUSE	-1.00245	0.149537	0.954857	9.86758e-07
Q8R3D1	Tbc1d13	TBC1 domain family member 13	TBC13_MOUSE	-0.218654	0.149702	0.954857	9.24873e-06
O55229	Chkb	Choline/ethanolamine kinase	CHKB_MOUSE	-0.124833	0.149742	0.954857	2.14531e-05
Q9CR61	Ndufb7	NADH dehydrogenase [ubiquinone] 1 beta subcomplex subunit 7	NDUB7_MOUSE	0.0787701	0.149758	0.954857	0.000452062
Q9CQW0	Emc6	ER membrane protein complex subunit 6	EMC6_MOUSE	0.233375	0.149788	0.954857	1.16218e-05
Q60597	Ogdh	2-oxoglutarate dehydrogenase, mitochondrial	ODO1_MOUSE	0.0817063	0.150291	0.954857	0.000815578
Q8BIJ7	Rufy1	RUN and FYVE domain-containing protein 1	RUFY1_MOUSE	-0.379628	0.150626	0.954857	4.46155e-06
A2AR02	Ppig	Peptidyl-prolyl cis-trans isomerase G	PPIG_MOUSE	0.378211	0.150655	0.954857	1.16854e-05
Q3UHK1	Slc2a13	Proton myo-inositol cotransporter	MYCT_MOUSE	0.0780134	0.150678	0.954857	6.46006e-05
P19973	Lsp1	Lymphocyte-specific protein 1	LSP1_MOUSE	0.314477	0.150718	0.954857	1.84033e-06
Q8C570	Rae1	mRNA export factor	RAE1L_MOUSE	0.223591	0.150833	0.954857	2.61709e-05
P62196	Psmc5	26S proteasome regulatory subunit 8	PRS8_MOUSE	-0.13991	0.151028	0.954857	0.000104052
P24547	Impdh2	Inosine-5'-monophosphate dehydrogenase 2	IMDH2_MOUSE	-0.108042	0.151195	0.954857	4.79783e-05
O88696	Clpp	ATP-dependent Clp protease proteolytic subunit, mitochondrial	CLPP_MOUSE	0.0734326	0.151226	0.954857	0.000122118
Q8R124	Klhl36	Kelch-like protein 36	KLH36_MOUSE	-0.176568	0.151299	0.954857	3.13893e-06
Q99J95	Cdk9	Cyclin-dependent kinase 9	CDK9_MOUSE	-0.643449	0.151387	0.954857	1.93497e-06
Q7M6Y3	Picalm	Phosphatidylinositol-binding clathrin assembly protein	PICAL_MOUSE	-0.279921	0.151599	0.954857	6.78247e-05
Q9Z2D0	Mtmr9	Myotubularin-related protein 9	MTMR9_MOUSE	0.204018	0.151715	0.954857	5.18213e-05
Q5U4D8	Slc5a6	Sodium-dependent multivitamin transporter	SC5A6_MOUSE	-0.514837	0.15173	0.954857	1.65154e-05
Q8JZM0	Tfb1m	Dimethyladenosine transferase 1, mitochondrial	TFB1M_MOUSE	0.360855	0.151877	0.954857	2.92714e-06
P97372	Psme2	Proteasome activator complex subunit 2	PSME2_MOUSE	-0.191892	0.152201	0.954857	2.62443e-05
Q99KH8	Stk24	Serine/threonine-protein kinase 24	STK24_MOUSE	-0.115747	0.152353	0.954857	6.54246e-05
Q61647	Has1	Hyaluronan synthase 1	HYAS1_MOUSE	0.0753335	0.152375	0.954857	0.000254659
P97494	Gclc	Glutamate--cysteine ligase catalytic subunit	GSH1_MOUSE	-0.0904764	0.152471	0.954857	7.75689e-05
Q9JKK0	Rcan3	Calcipressin-3	RCAN3_MOUSE	-0.231424	0.152516	0.954857	3.0302e-06
Q9WVA3	Bub3	Mitotic checkpoint protein BUB3	BUB3_MOUSE	-0.359065	0.153217	0.954857	2.3193e-05
Q9QZQ1	Afdn	Afadin	AFAD_MOUSE	-0.299872	0.153325	0.954857	4.55236e-05
Q9D7S9	Chmp5	Charged multivesicular body protein 5	CHMP5_MOUSE	-0.236295	0.153342	0.954857	5.57694e-05
Q8BPQ7	Sgsm1	Small G protein signaling modulator 1	SGSM1_MOUSE	0.139577	0.153709	0.954857	6.36611e-05
O88705	Hcn3	Potassium/sodium hyperpolarization-activated cyclic nucleotide-gated channel 3	HCN3_MOUSE	-0.197704	0.15381	0.954857	7.3671e-06
P97411	Ica1	Islet cell autoantigen 1	ICA69_MOUSE	-0.150487	0.153855	0.954857	2.52722e-05
Q6P5U7	Nwd2	NACHT and WD repeat domain-containing protein 2	NWD2_MOUSE	-0.361037	0.153876	0.954857	2.72295e-05
Q9D051	Pdhb	Pyruvate dehydrogenase E1 component subunit beta, mitochondrial	ODPB_MOUSE	0.0928066	0.153877	0.954857	0.00111533
Q62276;Q15528	Med22;MED22	Mediator of RNA polymerase II transcription subunit 22	MED22_MOUSE;MED22_HUMAN	0.415427	0.153971	0.954857	5.74917e-07
Q9DD02	Hikeshi	Protein Hikeshi	HIKES_MOUSE	-0.107525	0.154184	0.954857	2.03813e-05
O70423	Aoc3	Membrane primary amine oxidase	AOC3_MOUSE	-0.308352	0.154316	0.954857	0.000121477
Q9WUR9	Ak4	Adenylate kinase 4, mitochondrial	KAD4_MOUSE	0.166998	0.154395	0.954857	0.000133374
Q68ED7	Crtc1	CREB-regulated transcription coactivator 1	CRTC1_MOUSE	-0.687164	0.154805	0.954857	4.80079e-05
Q5SXI5	Znf496	Zinc finger protein 496	ZN496_MOUSE	-7.25711	0.155038	0.954857	0.0024404
Q3TBW2	Mrpl10	39S ribosomal protein L10, mitochondrial	RM10_MOUSE	0.4215	0.155062	0.954857	3.97922e-06
P61082	Ube2m	NEDD8-conjugating enzyme Ubc12	UBC12_MOUSE	-0.0467966	0.155142	0.954857	0.000222382
Q8BMP6	Acbd3	Golgi resident protein GCP60	GCP60_MOUSE	-0.219416	0.155515	0.954857	1.92972e-05
Q8BKY8	Mterf2	Transcription termination factor 2, mitochondrial	MTEF2_MOUSE	0.245316	0.155699	0.954857	3.39126e-06
Q99M51	Nck1	Cytoplasmic protein NCK1	NCK1_MOUSE	-0.107054	0.155721	0.954857	2.95028e-05
O88441	Mtx2	Metaxin-2	MTX2_MOUSE	0.270903	0.155805	0.954857	8.08517e-05
Q9D0E3	Lysmd1	LysM and putative peptidoglycan-binding domain-containing protein 1	LYSM1_MOUSE	-0.177246	0.15582	0.954857	2.44528e-05
Q6P1D5	Sez6l	Seizure 6-like protein	SE6L1_MOUSE	-0.442642	0.156081	0.955429	1.48448e-05
Q9Z1S5	Septin3	Neuronal-specific septin-3	SEPT3_MOUSE	0.498886	0.156456	0.956421	0.000497962
Q9D0I9	Rars	Arginine--tRNA ligase, cytoplasmic	SYRC_MOUSE	-0.081151	0.156623	0.956421	6.58054e-05
P70280	Vamp7	Vesicle-associated membrane protein 7	VAMP7_MOUSE	0.172172	0.156746	0.956421	4.63454e-05
Q61035	Hars	Histidine--tRNA ligase, cytoplasmic	SYHC_MOUSE	-0.237477	0.156979	0.956819	0.000132572
Q8CGF7	Tcerg1	Transcription elongation regulator 1	TCRG1_MOUSE	-0.310851	0.158179	0.960597	2.22447e-05
Q64387	Pnoc	Prepronociceptin	PNOC_MOUSE	-0.709789	0.158187	0.960597	2.01721e-05
P62852	Rps25	40S ribosomal protein S25	RS25_MOUSE	0.260121	0.158415	0.960597	0.00019887
Q3UJD6	Usp19	Ubiquitin carboxyl-terminal hydrolase 19	UBP19_MOUSE	-0.158693	0.158428	0.960597	8.40808e-06
Q8JZP9	Gas2l1	GAS2-like protein 1	GA2L1_MOUSE	-0.366249	0.158442	0.960597	6.20831e-06
Q9D0Y8	Mrpl52	39S ribosomal protein L52, mitochondrial	RM52_MOUSE	0.227503	0.159091	0.962341	3.80527e-06
Q7TQI3	Otub1	Ubiquitin thioesterase OTUB1	OTUB1_MOUSE	-0.191065	0.159231	0.962341	0.0003991
O35671	Itgb1bp1	Integrin beta-1-binding protein 1	ITBP1_MOUSE	-0.825882	0.159236	0.962341	1.16675e-05
P62897,P62898	Cycs	Cytochrome c, somatic,Cytochrome c, somatic	CYC_MOUSE,CYC_RAT	-0.134668	0.159971	0.964906	0.0013569
Q64704	Stx3	Syntaxin-3	STX3_MOUSE	-0.173359	0.160075	0.964906	6.53976e-06
Q80UY2	Kcmf1	E3 ubiquitin-protein ligase KCMF1	KCMF1_MOUSE	-0.135638	0.160169	0.964906	5.28514e-06
Q8BJL0	Smarcal1	SWI/SNF-related matrix-associated actin-dependent regulator of chromatin subfamily A-like protein 1	SMAL1_MOUSE	-0.477596	0.161153	0.966392	2.81503e-06
Q8BYY4	Ttc39b	Tetratricopeptide repeat protein 39B	TT39B_MOUSE	-0.305814	0.161173	0.966392	1.42847e-05
Q9D4V0	Etnk1	Ethanolamine kinase 1	EKI1_MOUSE	-0.193508	0.161393	0.966392	1.16948e-05
Q60803	Traf3	TNF receptor-associated factor 3	TRAF3_MOUSE	0.653429	0.161414	0.966392	0.000108329
Q8BWQ6	Vps35l	VPS35 endosomal protein sorting factor-like	VP35L_MOUSE	0.113098	0.161606	0.966392	2.11748e-05
Q9WUM3	Coro1b	Coronin-1B	COR1B_MOUSE	-0.130605	0.161673	0.966392	0.000227545
Q9ER72	Cars	Cysteine--tRNA ligase, cytoplasmic	SYCC_MOUSE	-0.0817531	0.161801	0.966392	3.56847e-05
Q3UFS4	Gpatch11	G patch domain-containing protein 11	GPT11_MOUSE	-0.413712	0.161865	0.966392	1.81319e-06
Q8BG94	Commd7	COMM domain-containing protein 7	COMD7_MOUSE	0.291099	0.161941	0.966392	1.41973e-05
Q9Z2V5	Hdac6	Histone deacetylase 6	HDAC6_MOUSE	-0.252283	0.162316	0.967612	1.87872e-05
Q8WTY4	Ciapin1	Anamorsin	CPIN1_MOUSE	0.353144	0.162937	0.969595	4.35788e-05
Q99JX4	Eif3m	Eukaryotic translation initiation factor 3 subunit M	EIF3M_MOUSE	-0.281261	0.162989	0.969595	3.18367e-05
Q3TYD6	Lmtk2	Serine/threonine-protein kinase LMTK2	LMTK2_MOUSE	-0.51328	0.163692	0.971845	5.13016e-06
Q61103	Dpf2	Zinc finger protein ubi-d4	REQU_MOUSE	-0.296531	0.163708	0.971845	6.0848e-06
Q9Z2N8	Actl6a	Actin-like protein 6A	ACL6A_MOUSE	-0.146437	0.164462	0.974415	9.12783e-06
Q8C0D4	Arhgap12	Rho GTPase-activating protein 12	RHG12_MOUSE	-0.22593	0.164483	0.974415	1.60325e-05
P58137	Acot8	Acyl-coenzyme A thioesterase 8	ACOT8_MOUSE	0.18985	0.164888	0.975799	6.0528e-06
Q8R373	Clmp	CXADR-like membrane protein	CLMP_MOUSE	-0.822433	0.165307	0.977269	2.42524e-06
Q91YR5	EEF1AKNMT	eEF1A lysine and N-terminal methyltransferase	EFNMT_MOUSE	-0.165857	0.165636	0.978195	4.01474e-06
Q9CR16	Ppid	Peptidyl-prolyl cis-trans isomerase D	PPID_MOUSE	-0.0783635	0.165941	0.978985	0.000325465
Q91V57	Chn1	N-chimaerin	CHIN_MOUSE	-0.18616	0.166427	0.980806	1.53912e-05
Q9EQS3	Mycbp	c-Myc-binding protein	MYCBP_MOUSE	-0.236389	0.166594	0.980806	1.59166e-05
Q8BX70	Vps13c	Vacuolar protein sorting-associated protein 13C	VP13C_MOUSE	-0.114819	0.166767	0.980809	4.0597e-05
P51410	Rpl9	60S ribosomal protein L9	RL9_MOUSE	-0.156806	0.167269	0.980955	0.000137337
Q14C51	Ptcd3	Pentatricopeptide repeat domain-containing protein 3, mitochondrial	PTCD3_MOUSE	0.6368	0.167279	0.980955	0.000174006
Q8C4Y3;Q8WX92	Nelfb;NELFB	Negative elongation factor B	NELFB_MOUSE;NELFB_HUMAN	-0.252972	0.16732	0.980955	2.79172e-06
P60764	Rac3	Ras-related C3 botulinum toxin substrate 3	RAC3_MOUSE	0.212739	0.16748	0.980955	0.00164293
O35855	Bcat2	Branched-chain-amino-acid aminotransferase, mitochondrial	BCAT2_MOUSE	0.237087	0.167752	0.981537	1.84479e-05
Q9R1V4	Adam11	Disintegrin and metalloproteinase domain-containing protein 11	ADA11_MOUSE	0.179253	0.16797	0.981806	5.04872e-05
P31750	Akt1	RAC-alpha serine/threonine-protein kinase	AKT1_MOUSE	-0.150888	0.168706	0.984074	1.90467e-05
P62254	Ube2g1	Ubiquitin-conjugating enzyme E2 G1	UB2G1_MOUSE	-0.139949	0.168836	0.984074	1.4462e-05
P23198	Cbx3	Chromobox protein homolog 3	CBX3_MOUSE	-0.276395	0.168915	0.984074	5.19725e-05
Q9QZH3	Ppie	Peptidyl-prolyl cis-trans isomerase E	PPIE_MOUSE	-0.0650043	0.169049	0.984074	0.00173622
Q61609	Slc20a1	Sodium-dependent phosphate transporter 1	S20A1_MOUSE	-0.409598	0.169754	0.986983	1.21996e-05
Q8BIE6	Frmd4a	FERM domain-containing protein 4A	FRM4A_MOUSE	-0.132303	0.169895	0.986983	4.80997e-06
P97355	Sms	Spermine synthase	SPSY_MOUSE	0.604956	0.17021	0.987168	8.02035e-05
Q02111	Prkcq	Protein kinase C theta type	KPCT_MOUSE	-0.248027	0.170347	0.987168	2.81931e-05
Q8BLR2	Cpne4	Copine-4	CPNE4_MOUSE	-0.291236	0.170446	0.987168	7.09188e-05
B1AZA5	Tmem245	Transmembrane protein 245	TM245_MOUSE	0.15537	0.171028	0.989532	6.3105e-06
Q9Z1G3	Atp6v1c1	V-type proton ATPase subunit C 1	VATC1_MOUSE	0.133655	0.171269	0.989921	0.000507975
P62340	Tbpl1	TATA box-binding protein-like protein 1	TBPL1_MOUSE	-0.64732	0.171774	0.991835	2.02502e-06
Q9CQH7	Btf3l4	Transcription factor BTF3 homolog 4	BT3L4_MOUSE	-0.134491	0.172238	0.993506	5.35715e-05
Q8CCJ3	Ufl1	E3 UFM1-protein ligase 1	UFL1_MOUSE	-0.165343	0.173261	0.996442	1.07972e-05
Q9CZX0	Elp3	Elongator complex protein 3	ELP3_MOUSE	-0.288674	0.173345	0.996442	2.85314e-05
Q99K70	Rragc	Ras-related GTP-binding protein C	RRAGC_MOUSE	-0.159616	0.173486	0.996442	4.53882e-05
Q9ER35	Fn3k	Fructosamine-3-kinase	FN3K_MOUSE	0.106316	0.173829	0.996442	4.88681e-05
Q9R0Y5	Ak1	Adenylate kinase isoenzyme 1	KAD1_MOUSE	-0.0953485	0.174037	0.996442	0.000754929
Q6PE13	Prrt3	Proline-rich transmembrane protein 3	PRRT3_MOUSE	-0.291935	0.174138	0.996442	8.37266e-05
Q78T54	Vma21	Vacuolar ATPase assembly integral membrane protein Vma21	VMA21_MOUSE	-0.194798	0.174327	0.996442	5.12016e-05
O88834	Shd	SH2 domain-containing adapter protein D	SHD_MOUSE	-0.552382	0.174508	0.996442	8.37248e-06
Q3USH1	Insyn2a	Inhibitory synaptic factor 2A	INSY2_MOUSE	-1.16387	0.174762	0.996442	2.04191e-06
Q3UA37	Qrich1	Glutamine-rich protein 1	QRIC1_MOUSE	-0.624201	0.17481	0.996442	3.46499e-06
P47867,P47868	Scg3	Secretogranin-3	SCG3_MOUSE,SCG3_RAT	-0.332064	0.174937	0.996442	2.84752e-05
Q8BHC4	Dcakd	Dephospho-CoA kinase domain-containing protein	DCAKD_MOUSE	0.133609	0.17497	0.996442	2.95693e-05
A2ADY9	Ddi2	Protein DDI1 homolog 2	DDI2_MOUSE	-0.175862	0.175196	0.996442	2.79255e-05
Q9CY34	Ube2f	NEDD8-conjugating enzyme UBE2F	UB2FA_MOUSE	0.0958061	0.175208	0.996442	1.50458e-05
Q9JHE7	Tssc4	Protein TSSC4	TSSC4_MOUSE	-0.366551	0.175798	0.996442	5.04775e-06
Q3ZK22	Vezt	Vezatin	VEZA_MOUSE	-0.452622	0.175863	0.996442	2.23238e-06
P70206	Plxna1	Plexin-A1	PLXA1_MOUSE	0.243279	0.175885	0.996442	5.09511e-05
P22892	Ap1g1	AP-1 complex subunit gamma-1	AP1G1_MOUSE	-0.0666332	0.17601	0.996442	0.000128586
Q9EQZ6	Rapgef4	Rap guanine nucleotide exchange factor 4	RPGF4_MOUSE	0.25657	0.17624	0.996442	5.6958e-05
Q99104	Myo5a	Unconventional myosin-Va	MYO5A_MOUSE	0.42915	0.176286	0.996442	0.000332964
Q99KI0	Aco2	Aconitate hydratase, mitochondrial	ACON_MOUSE	0.123045	0.176541	0.996442	0.0034386
Q8R1U1	Cog4	Conserved oligomeric Golgi complex subunit 4	COG4_MOUSE	-0.186701	0.176593	0.996442	5.19216e-06
Q8K0X8	Fez1	Fasciculation and elongation protein zeta-1	FEZ1_MOUSE	-0.244479	0.177034	0.997938	1.10305e-05
Q03958	Pfdn6	Prefoldin subunit 6	PFD6_MOUSE	-0.10685	0.177719	0.999974	7.06735e-05
Q9CWG8	Ndufaf7	Protein arginine methyltransferase NDUFAF7, mitochondrial	NDUF7_MOUSE	0.118015	0.178206	0.999974	8.12436e-06
Q64152	Btf3	Transcription factor BTF3	BTF3_MOUSE	-0.211419	0.178482	0.999974	1.6865e-05
Q9JKY5	Hip1r	Huntingtin-interacting protein 1-related protein	HIP1R_MOUSE	-0.0826162	0.179085	0.999974	4.99257e-05
Q0V8T9	Cntnap5a	Contactin-associated protein like 5-1	CTP5A_MOUSE	-0.151859	0.179113	0.999974	1.11097e-05
Q8K021	Scamp1	Secretory carrier-associated membrane protein 1	SCAM1_MOUSE	-0.0925633	0.179353	0.999974	0.00025863
Q0VGU4	Vgf	Neurosecretory protein VGF	VGF_MOUSE	-0.565689	0.179628	0.999974	0.000262583
Q9JKL4	Ndufaf3	NADH dehydrogenase [ubiquinone] 1 alpha subcomplex assembly factor 3	NDUF3_MOUSE	0.133793	0.179633	0.999974	3.86012e-05
Q8BIW1	Prune1	Exopolyphosphatase PRUNE1	PRUN1_MOUSE	-0.106852	0.179734	0.999974	4.74814e-05
Q8C0P5	Coro2a	Coronin-2A	COR2A_MOUSE	0.0753989	0.180405	0.999974	4.32422e-05
Q8VBV3	Exosc2	Exosome complex component RRP4	EXOS2_MOUSE	-0.182037	0.180517	0.999974	2.80396e-06
Q99KK7	Dpp3	Dipeptidyl peptidase 3	DPP3_MOUSE	-0.0770188	0.181122	0.999974	8.82038e-05
Q9QZ23	Nfu1	NFU1 iron-sulfur cluster scaffold homolog, mitochondrial	NFU1_MOUSE	0.125941	0.181152	0.999974	0.000135691
Q8VE33	Gdap1l1	Ganglioside-induced differentiation-associated protein 1-like 1	GD1L1_MOUSE	0.105158	0.181198	0.999974	0.000167101
P62908	Rps3	40S ribosomal protein S3	RS3_MOUSE	-0.137411	0.181199	0.999974	0.000248398
O70228	Atp9a	Probable phospholipid-transporting ATPase IIA	ATP9A_MOUSE	0.0841114	0.181416	0.999974	3.16429e-05
P62830	Rpl23	60S ribosomal protein L23	RL23_MOUSE	0.171825	0.182156	0.999974	0.000128422
Q8BFY9	Tnpo1	Transportin-1	TNPO1_MOUSE	-0.15066	0.182211	0.999974	4.55895e-05
Q6P6I6	Polr2m	DNA-directed RNA polymerase II subunit GRINL1A	GRL1A_MOUSE	-0.419185	0.182605	0.999974	6.81173e-06
Q01405	Sec23a	Protein transport protein Sec23A	SC23A_MOUSE	-0.21009	0.182788	0.999974	7.69663e-05
Q9D3P9	Nts	Neurotensin/neuromedin N	NEUT_MOUSE	-0.493733	0.182872	0.999974	1.08574e-05
Q9JKC6	Cend1	Cell cycle exit and neuronal differentiation protein 1	CEND_MOUSE	-0.136896	0.182909	0.999974	0.00148624
Q62415	Ppp1r13b	Apoptosis-stimulating of p53 protein 1	ASPP1_MOUSE	-0.117154	0.183001	0.999974	2.22952e-05
Q6PFE7	Tmeff1	Tomoregulin-1	TEFF1_MOUSE	0.137734	0.183224	0.999974	1.64832e-05
Q9CZN4	Shisa9	Protein shisa-9	SHSA9_MOUSE	-0.468503	0.183236	0.999974	2.30743e-05
Q9CPX6	Atg3	Ubiquitin-like-conjugating enzyme ATG3	ATG3_MOUSE	-0.192172	0.183246	0.999974	5.66281e-05
P63028	Tpt1	Translationally-controlled tumor protein	TCTP_MOUSE	-0.327158	0.183251	0.999974	0.000214911
Q921G7	Etfdh	Electron transfer flavoprotein-ubiquinone oxidoreductase, mitochondrial	ETFD_MOUSE	0.0667243	0.183486	0.999974	0.000219356
Q69ZZ6	Tmcc1	Transmembrane and coiled-coil domains protein 1	TMCC1_MOUSE	0.129449	0.183557	0.999974	1.14793e-05
Q9R1P0	Psma4	Proteasome subunit alpha type-4	PSA4_MOUSE	-0.242189	0.183601	0.999974	0.000248731
Q61290	Cacna1e	Voltage-dependent R-type calcium channel subunit alpha-1E	CAC1E_MOUSE	-0.761912	0.184141	0.999974	3.67239e-05
Q5SYL3	Kiaa0100	Protein KIAA0100	K0100_MOUSE	-0.421962	0.184239	0.999974	7.60862e-07
P14206	Rpsa	40S ribosomal protein SA	RSSA_MOUSE	-0.0796579	0.184566	0.999974	0.00030173
Q99MB7	Rnf141	RING finger protein 141	RN141_MOUSE	0.13111	0.184665	0.999974	2.32401e-05
Q9D1Q6	Erp44	Endoplasmic reticulum resident protein 44	ERP44_MOUSE	0.221287	0.184741	0.999974	8.31026e-05
P16951	Atf2	Cyclic AMP-dependent transcription factor ATF-2	ATF2_MOUSE	-0.396832	0.184957	0.999974	5.8047e-06
Q8VI63	Mob2	MOB kinase activator 2	MOB2_MOUSE	-0.159907	0.185925	0.999974	2.32286e-05
P00848	Mtatp6	ATP synthase subunit a	ATP6_MOUSE	-0.500865	0.186002	0.999974	4.86658e-06
Q9D0L8	Rnmt	mRNA cap guanine-N7 methyltransferase	MCES_MOUSE	-0.168856	0.186534	0.999974	0.00011187
P62814	Atp6v1b2	V-type proton ATPase subunit B, brain isoform	VATB2_MOUSE	0.258828	0.186562	0.999974	0.00157876
Q9CQS8	Sec61b	Protein transport protein Sec61 subunit beta	SC61B_MOUSE	0.125798	0.186887	0.999974	7.29322e-05
Q9Z1K5;Q9Y4X5	Arih1;ARIH1	E3 ubiquitin-protein ligase ARIH1	ARI1_MOUSE;ARI1_HUMAN	-0.0784489	0.187139	0.999974	2.58199e-05
Q8C5W3	Tbcel	Tubulin-specific chaperone cofactor E-like protein	TBCEL_MOUSE	-0.0916116	0.187295	0.999974	1.58567e-05
Q8VIM9	Irgq	Immunity-related GTPase family Q protein	IRGQ_MOUSE	-0.130394	0.187517	0.999974	5.77001e-05
Q921W0	Chmp1a	Charged multivesicular body protein 1a	CHM1A_MOUSE	0.176598	0.187981	0.999974	4.08389e-05
Q6GQW0	Btbd11	Ankyrin repeat and BTB/POZ domain-containing protein BTBD11	BTBDB_MOUSE	0.766507	0.188156	0.999974	2.46641e-06
Q9D4H8	Cul2	Cullin-2	CUL2_MOUSE	-0.0899511	0.188174	0.999974	7.52386e-05
Q91WG5	Prkag2	5'-AMP-activated protein kinase subunit gamma-2	AAKG2_MOUSE	-0.282133	0.188353	0.999974	1.45936e-05
Q62083	Pick1	PRKCA-binding protein	PICK1_MOUSE	0.243281	0.188366	0.999974	2.91873e-05
B1AY13	Usp24	Ubiquitin carboxyl-terminal hydrolase 24	UBP24_MOUSE	2.89368	0.18858	0.999974	5.21473e-05
Q6PCP5	Mff	Mitochondrial fission factor	MFF_MOUSE	-0.12446	0.188845	0.999974	0.000114902
Q8R2R3	Aagab	Alpha- and gamma-adaptin-binding protein p34	AAGAB_MOUSE	-0.224171	0.188881	0.999974	2.12643e-06
Q9CXW3	Cacybp	Calcyclin-binding protein	CYBP_MOUSE	-0.315903	0.188938	0.999974	0.000102453
Q8K1Z0	Coq9	Ubiquinone biosynthesis protein COQ9, mitochondrial	COQ9_MOUSE	0.159854	0.189125	0.999974	8.67742e-05
Q99LI7	Cstf3	Cleavage stimulation factor subunit 3	CSTF3_MOUSE	-0.423877	0.189308	0.999974	5.45585e-06
Q6P9S0	Mtss2	Protein MTSS 2	MTSS2_MOUSE	-0.429519	0.189756	0.999974	2.78055e-05
P01831	Thy1	Thy-1 membrane glycoprotein	THY1_MOUSE	0.139105	0.190423	0.999974	0.00216125
Q9CY97	Ssu72	RNA polymerase II subunit A C-terminal domain phosphatase SSU72	SSU72_MOUSE	-0.3849	0.190985	0.999974	8.45295e-06
Q9DC69	Ndufa9	NADH dehydrogenase [ubiquinone] 1 alpha subcomplex subunit 9, mitochondrial	NDUA9_MOUSE	0.105613	0.191132	0.999974	0.000416695
Q5NCC3	Trim41	E3 ubiquitin-protein ligase TRIM41	TRI41_MOUSE	-0.864248	0.191222	0.999974	7.33973e-07
Q9CQ10	Chmp3	Charged multivesicular body protein 3	CHMP3_MOUSE	-0.121663	0.191323	0.999974	4.08184e-05
P83940	Eloc	Elongin-C	ELOC_MOUSE	-0.0845372	0.191455	0.999974	9.04025e-05
Q01579,Q64471	Gstt1	Glutathione S-transferase theta-1	GSTT1_RAT,GSTT1_MOUSE	0.113468	0.191481	0.999974	1.913e-05
Q9QXK3	Copg2	Coatomer subunit gamma-2	COPG2_MOUSE	-0.191395	0.191527	0.999974	2.46986e-05
Q9JJY4	Ddx20	Probable ATP-dependent RNA helicase DDX20	DDX20_MOUSE	-0.462429	0.192116	0.999974	1.75559e-06
Q9CZG3	Commd8	COMM domain-containing protein 8	COMD8_MOUSE	-0.139079	0.192328	0.999974	7.22343e-06
Q8R4H2	Arhgef12	Rho guanine nucleotide exchange factor 12	ARHGC_MOUSE	-0.115753	0.193641	0.999974	1.57453e-05
Q923M0	Ppp1r16a	Protein phosphatase 1 regulatory subunit 16A	PP16A_MOUSE	-0.25688	0.193664	0.999974	9.47923e-06
Q8BYK6;Q7Z739	Ythdf3;YTHDF3	YTH domain-containing family protein 3	YTHD3_MOUSE;YTHD3_HUMAN	-0.465351	0.194215	0.999974	7.62895e-06
Q56A07	Scn2b	Sodium channel subunit beta-2	SCN2B_MOUSE	0.289477	0.194311	0.999974	0.000155325
Q8K400	Stxbp5	Syntaxin-binding protein 5	STXB5_MOUSE	-0.150513	0.194833	0.999974	0.000238873
Q8R5C5	Actr1b	Beta-centractin	ACTY_MOUSE	0.0654951	0.19529	0.999974	0.000172261
P62259	Ywhae	14-3-3 protein epsilon	1433E_MOUSE	0.155264	0.19544	0.999974	0.00109927
Q6NZK8	Ptpdc1	Protein tyrosine phosphatase domain-containing protein 1	PTPC1_MOUSE	-0.622838	0.19648	0.999974	4.72861e-06
Q6ZWY8	Tmsb10	Thymosin beta-10	TYB10_MOUSE	-0.705616	0.196501	0.999974	0.000432294
P70295	Aup1	Ancient ubiquitous protein 1	AUP1_MOUSE	0.147864	0.196718	0.999974	7.32706e-06
Q9D2P8	Mobp	Myelin-associated oligodendrocyte basic protein	MOBP_MOUSE	0.425753	0.197361	0.999974	0.000132921
Q9D9K3	Aven	Cell death regulator Aven	AVEN_MOUSE	0.94942	0.19794	0.999974	7.31268e-06
Q6ZPR5	Smpd4	Sphingomyelin phosphodiesterase 4	NSMA3_MOUSE	0.436353	0.198196	0.999974	2.14942e-06
Q3U2V3	Nudt18	8-oxo-dGDP phosphatase NUDT18	NUD18_MOUSE	-0.0972502	0.198954	0.999974	6.56474e-06
Q8CHP5	Pym1	Partner of Y14 and mago	PYM1_MOUSE	-0.273985	0.199211	0.999974	1.80484e-05
Q8VHQ3	Ppp1r16b	Protein phosphatase 1 regulatory inhibitor subunit 16B	PP16B_MOUSE	-0.393339	0.199245	0.999974	7.65523e-06
O54879	Hmgb3	High mobility group protein B3	HMGB3_MOUSE	-0.434655	0.200078	0.999974	3.58171e-05
Q9D172	Gatd3a	Glutamine amidotransferase-like class 1 domain-containing protein 3A, mitochondrial	GAL3A_MOUSE	0.205932	0.200392	0.999974	0.000669135
Q7TSI3	Ppp6r1	Serine/threonine-protein phosphatase 6 regulatory subunit 1	PP6R1_MOUSE	-0.218664	0.201033	0.999974	2.09141e-05
P46656	Fdx1	Adrenodoxin, mitochondrial	ADX_MOUSE	0.436127	0.20106	0.999974	9.48446e-06
Q8R5H1	Usp15	Ubiquitin carboxyl-terminal hydrolase 15	UBP15_MOUSE	-0.154932	0.201321	0.999974	3.98406e-05
O88384	Vti1b	Vesicle transport through interaction with t-SNAREs homolog 1B	VTI1B_MOUSE	-0.107396	0.201585	0.999974	4.80993e-05
Q8VHK9	Dhx36	ATP-dependent DNA/RNA helicase DHX36	DHX36_MOUSE	-0.264017	0.201714	0.999974	4.75778e-06
Q9WVL3	Slc12a7	Solute carrier family 12 member 7	S12A7_MOUSE	0.0648841	0.201794	0.999974	2.51019e-05
Q8R3Q0	Saraf	Store-operated calcium entry-associated regulatory factor	SARAF_MOUSE	0.163266	0.201854	0.999974	5.26596e-06
Q8BHI7	Elovl5	Elongation of very long chain fatty acids protein 5	ELOV5_MOUSE	0.240171	0.202122	0.999974	1.4149e-05
Q8K1D8	Enho	Adropin	ENHO_MOUSE	-0.537771	0.2023	0.999974	2.90856e-06
Q9Z1R2	Bag6	Large proline-rich protein BAG6	BAG6_MOUSE	-0.0686204	0.202462	0.999974	6.64851e-05
Q9R1Q8	Tagln3	Transgelin-3	TAGL3_MOUSE	0.261915	0.202812	0.999974	0.000861753
P49446	Ptpre	Receptor-type tyrosine-protein phosphatase epsilon	PTPRE_MOUSE	-0.10538	0.202837	0.999974	2.66001e-05
P47955	Rplp1	60S acidic ribosomal protein P1	RLA1_MOUSE	0.150795	0.203019	0.999974	7.83183e-05
Q61334	Bcap29	B-cell receptor-associated protein 29	BAP29_MOUSE	0.118776	0.203105	0.999974	2.14547e-05
P03911	Mtnd4	NADH-ubiquinone oxidoreductase chain 4	NU4M_MOUSE	-0.157144	0.203837	0.999974	6.81001e-05
Q9ERK4	Cse1l	Exportin-2	XPO2_MOUSE	-0.114617	0.203988	0.999974	0.000131957
Q9CR59	Gadd45gip1	Growth arrest and DNA damage-inducible proteins-interacting protein 1	G45IP_MOUSE	0.226435	0.204484	0.999974	1.42287e-05
Q61315	Apc	Adenomatous polyposis coli protein	APC_MOUSE	-0.144389	0.20451	0.999974	6.52416e-06
Q9QZ73	Dcun1d1	DCN1-like protein 1	DCNL1_MOUSE	-0.0794881	0.204529	0.999974	3.47907e-05
Q9CQK7	Rwdd1	RWD domain-containing protein 1	RWDD1_MOUSE	-0.100558	0.204892	0.999974	5.23235e-05
Q8R3R8;Q9H0R8	Gabarapl1;GABARAPL1	Gamma-aminobutyric acid receptor-associated protein-like 1	GBRL1_MOUSE;GBRL1_HUMAN	0.112545	0.205112	0.999974	5.33377e-05
P97822	Anp32e	Acidic leucine-rich nuclear phosphoprotein 32 family member E	AN32E_MOUSE	-0.589831	0.205114	0.999974	2.82758e-05
Q505D7	Opa3	Optic atrophy 3 protein homolog	OPA3_MOUSE	0.0593809	0.205164	0.999974	8.5411e-05
Q9WVI9	Mapk8ip1	C-Jun-amino-terminal kinase-interacting protein 1	JIP1_MOUSE	-0.336318	0.205242	0.999974	6.44938e-06
P60202;P60201,O23179	Plp1;PLP1,PLP1	Myelin proteolipid protein;Myelin proteolipid protein,Patatin-like protein 1	MYPR_MOUSE;MYPR_HUMAN,PLP1_ARATH	0.435881	0.205272	0.999974	0.0162782
O08808	Diaph1	Protein diaphanous homolog 1	DIAP1_MOUSE	0.370492	0.205552	0.999974	1.59079e-05
Q3U0V1	Khsrp	Far upstream element-binding protein 2	FUBP2_MOUSE	-0.442442	0.205596	0.999974	0.000121618
Q8CAB8	Castor2	Cytosolic arginine sensor for mTORC1 subunit 2	CAST2_MOUSE	-0.353968	0.205854	0.999974	8.28494e-06
Q9D868	Ppih	Peptidyl-prolyl cis-trans isomerase H	PPIH_MOUSE	-0.166739	0.206252	0.999974	2.81042e-05
P97450	Atp5pf	ATP synthase-coupling factor 6, mitochondrial	ATP5J_MOUSE	0.126089	0.206364	0.999974	0.000839042
Q60960	Kpna1	Importin subunit alpha-5	IMA5_MOUSE	-0.0648519	0.206703	0.999974	4.81656e-05
Q9JMA1	Usp14	Ubiquitin carboxyl-terminal hydrolase 14	UBP14_MOUSE	-0.0912343	0.20708	0.999974	0.000167801
Q6PDI6	Mindy2	Ubiquitin carboxyl-terminal hydrolase MINDY-2	MINY2_MOUSE	-0.226808	0.207139	0.999974	1.90455e-05
Q8K3C3	Lzic	Protein LZIC	LZIC_MOUSE	-0.174118	0.207864	0.999974	2.33769e-05
Q8CDA1	Inpp5f	Phosphatidylinositide phosphatase SAC2	SAC2_MOUSE	-0.138573	0.208076	0.999974	5.94457e-05
P35278	Rab5c	Ras-related protein Rab-5C	RAB5C_MOUSE	0.248191	0.208461	0.999974	0.000257231
P11627	L1cam	Neural cell adhesion molecule L1	L1CAM_MOUSE	0.243725	0.208512	0.999974	0.000289397
Q8BTF8	Ralyl	RNA-binding Raly-like protein	RALYL_MOUSE	-0.197504	0.208515	0.999974	5.62475e-06
Q8K0T0	Rtn1	Reticulon-1	RTN1_MOUSE	-0.264159	0.208856	0.999974	0.000604995
P35550	Fbl	rRNA 2'-O-methyltransferase fibrillarin	FBRL_MOUSE	0.134131	0.209187	0.999974	2.04359e-05
Q922S4	Pde2a	cGMP-dependent 3',5'-cyclic phosphodiesterase	PDE2A_MOUSE	0.282095	0.209381	0.999974	0.000543774
Q8CCS6	Pabpn1	Polyadenylate-binding protein 2	PABP2_MOUSE	-0.322376	0.209592	0.999974	1.98223e-05
Q9CZP7	Cdc37l1	Hsp90 co-chaperone Cdc37-like 1	CD37L_MOUSE	-0.534877	0.209606	0.999974	9.01429e-06
Q9D0C4	Trmt5	tRNA (guanine(37)-N1)-methyltransferase	TRM5_MOUSE	-0.391639	0.210126	0.999974	3.158e-06
Q80VC9	Camsap3	Calmodulin-regulated spectrin-associated protein 3	CAMP3_MOUSE	-0.0800881	0.21019	0.999974	3.75304e-05
Q9DBX6	Cyp2s1	Cytochrome P450 2S1	CP2S1_MOUSE	0.0861109	0.210491	0.999974	1.23478e-05
Q9QYY0	Gab1	GRB2-associated-binding protein 1	GAB1_MOUSE	-0.693322	0.210708	0.999974	7.26617e-05
P60229;P60228	Eif3e;EIF3E	Eukaryotic translation initiation factor 3 subunit E	EIF3E_MOUSE;EIF3E_HUMAN	-0.143876	0.211133	0.999974	5.63021e-05
Q8VDS4	Rprd1a	Regulation of nuclear pre-mRNA domain-containing protein 1A	RPR1A_MOUSE	1.35359	0.211177	0.999974	7.05688e-05
P50153	Gng4	Guanine nucleotide-binding protein G(I)/G(S)/G(O) subunit gamma-4	GBG4_MOUSE	0.112368	0.211414	0.999974	0.000255455
Q9JJR8	Tmem9b	Transmembrane protein 9B	TMM9B_MOUSE	0.119899	0.211456	0.999974	9.10243e-05
Q8C7M3	Trim9	E3 ubiquitin-protein ligase TRIM9	TRIM9_MOUSE	-0.450368	0.211548	0.999974	5.24028e-05
Q9D4F8	Tubgcp4	Gamma-tubulin complex component 4	GCP4_MOUSE	-0.120493	0.211564	0.999974	4.51589e-06
Q6P3A8	Bckdhb	2-oxoisovalerate dehydrogenase subunit beta, mitochondrial	ODBB_MOUSE	0.0878777	0.211623	0.999974	3.39282e-05
Q9EQN3	Tsc22d4	TSC22 domain family protein 4	T22D4_MOUSE	0.207851	0.212352	0.999974	4.92239e-05
Q07813	Bax	Apoptosis regulator BAX	BAX_MOUSE	-0.213807	0.21242	0.999974	2.62992e-05
Q99J09	Wdr77	Methylosome protein 50	MEP50_MOUSE	-0.0584747	0.212693	0.999974	6.88609e-05
Q8BHF7	Pgs1	CDP-diacylglycerol--glycerol-3-phosphate 3-phosphatidyltransferase, mitochondrial	PGPS1_MOUSE	0.142119	0.212824	0.999974	3.43513e-05
Q61070	Ei24	Etoposide-induced protein 2.4	EI24_MOUSE	0.384138	0.213245	0.999974	9.21434e-06
P61750	Arf4	ADP-ribosylation factor 4	ARF4_MOUSE	-0.0421394	0.213295	0.999974	6.32833e-05
Q62421	Sh3gl3	Endophilin-A3	SH3G3_MOUSE	0.114445	0.21332	0.999974	0.00010926
Q9EQU5	Set	Protein SET	SET_MOUSE	-0.349677	0.213335	0.999974	0.000120526
Q8R050	Gspt1	Eukaryotic peptide chain release factor GTP-binding subunit ERF3A	ERF3A_MOUSE	-0.124978	0.213455	0.999974	9.98823e-05
E9Q7X7	Nrxn2	Neurexin-2	NRX2A_MOUSE	-0.329122	0.21347	0.999974	7.26021e-05
P60041	Sst	Somatostatin	SMS_MOUSE	-0.478681	0.213607	0.999974	0.000121152
Q99N84	Mrps18b	28S ribosomal protein S18b, mitochondrial	RT18B_MOUSE	0.154811	0.213774	0.999974	1.01723e-05
P0DJF2	Pet117	Protein PET117 homolog, mitochondrial	PT117_MOUSE	-0.116225	0.214022	0.999974	1.14617e-05
Q91YN5	Uap1	UDP-N-acetylhexosamine pyrophosphorylase	UAP1_MOUSE	-0.164186	0.214408	0.999974	9.82299e-06
Q62418	Dbnl	Drebrin-like protein	DBNL_MOUSE	-0.209026	0.214554	0.999974	0.00018346
Q8VCC9	Spon1	Spondin-1	SPON1_MOUSE	-0.277118	0.214621	0.999974	4.09043e-05
Q8VBT9	Aspscr1	Tether containing UBX domain for GLUT4	ASPC1_MOUSE	-0.150929	0.215164	0.999974	2.527e-05
Q9D6J6	Ndufv2	NADH dehydrogenase [ubiquinone] flavoprotein 2, mitochondrial	NDUV2_MOUSE	0.0624478	0.215446	0.999974	0.000590932
Q8C7E9	Cstf2t	Cleavage stimulation factor subunit 2 tau variant	CSTFT_MOUSE	-0.155799	0.215949	0.999974	2.02435e-06
Q9CW46	Raver1	Ribonucleoprotein PTB-binding 1	RAVR1_MOUSE	-0.344816	0.215968	0.999974	6.58017e-07
Q9Z2D3	Gsdme	Gasdermin-E	GSDME_MOUSE	-0.10245	0.216358	0.999974	2.82896e-05
O35648	Cetn3	Centrin-3	CETN3_MOUSE	-0.347453	0.216774	0.999974	3.50056e-06
Q8K0T4	Katnal1	Katanin p60 ATPase-containing subunit A-like 1	KATL1_MOUSE	-0.0626501	0.217086	0.999974	5.08521e-05
Q91VC9	Ghitm	Growth hormone-inducible transmembrane protein	GHITM_MOUSE	0.270525	0.217231	0.999974	2.8666e-05
Q9CSN1	Snw1	SNW domain-containing protein 1	SNW1_MOUSE	-0.372919	0.217483	0.999974	1.29439e-05
Q99N57	Raf1	RAF proto-oncogene serine/threonine-protein kinase	RAF1_MOUSE	-0.403693	0.217614	0.999974	1.32787e-06
P70444	Bid	BH3-interacting domain death agonist	BID_MOUSE	-0.314168	0.21767	0.999974	8.32901e-06
Q9CQ69	Uqcrq	Cytochrome b-c1 complex subunit 8	QCR8_MOUSE	0.103028	0.217736	0.999974	0.00115006
Q91YL3	Uckl1	Uridine-cytidine kinase-like 1	UCKL1_MOUSE	-0.209829	0.218628	0.999974	1.03739e-05
Q9CPW7	Zmat2	Zinc finger matrin-type protein 2	ZMAT2_MOUSE	-0.380112	0.218694	0.999974	4.82304e-06
P10649	Gstm1	Glutathione S-transferase Mu 1	GSTM1_MOUSE	0.126863	0.218897	0.999974	0.00070423
Q9DCS3	Mecr	Enoyl-[acyl-carrier-protein] reductase, mitochondrial	MECR_MOUSE	0.0784545	0.219333	0.999974	6.92013e-05
Q9D7H3	RtcA	RNA 3'-terminal phosphate cyclase	RTCA_MOUSE	-0.17955	0.219374	0.999974	6.10288e-05
Q8CGC4	Lsm14b	Protein LSM14 homolog B	LS14B_MOUSE	-0.801333	0.219764	0.999974	7.36788e-06
Q9Z103	Adnp	Activity-dependent neuroprotector homeobox protein	ADNP_MOUSE	-0.468571	0.220027	0.999974	2.10315e-06
Q925F2	Esam	Endothelial cell-selective adhesion molecule	ESAM_MOUSE	0.127739	0.220157	0.999974	6.85862e-06
Q9JI78	Ngly1	Peptide-N(4)-(N-acetyl-beta-glucosaminyl)asparagine amidase	NGLY1_MOUSE	-0.171249	0.220264	0.999974	1.10968e-05
Q9JJR9;Q9NQ35	Nrip3;NRIP3	Nuclear receptor-interacting protein 3	NRIP3_MOUSE;NRIP3_HUMAN	-0.872818	0.220482	0.999974	3.40444e-06
Q9JMG1	Edf1	Endothelial differentiation-related factor 1	EDF1_MOUSE	-0.274568	0.220869	0.999974	1.70319e-05
Q8R1T1	Chmp7	Charged multivesicular body protein 7	CHMP7_MOUSE	-0.126202	0.221301	0.999974	2.32553e-05
P08113	Hsp90b1	Endoplasmin	ENPL_MOUSE	0.0850942	0.221462	0.999974	0.000577306
Q61475	Cd55	Complement decay-accelerating factor, GPI-anchored	DAF1_MOUSE	0.145021	0.221579	0.999974	1.17395e-06
O88848	Arl6	ADP-ribosylation factor-like protein 6	ARL6_MOUSE	-0.14753	0.221668	0.999974	2.38065e-05
Q8C7Q4	Rbm4	RNA-binding protein 4	RBM4_MOUSE	-0.289321	0.222319	0.999974	3.81812e-06
O70250	Pgam2	Phosphoglycerate mutase 2	PGAM2_MOUSE	-0.0642177	0.222456	0.999974	0.00143419
Q810U4	Nrcam	Neuronal cell adhesion molecule	NRCAM_MOUSE	-0.257271	0.222555	0.999974	0.000156517
Q9QZF2	Gpc1	Glypican-1	GPC1_MOUSE	-0.396017	0.222844	0.999974	7.49114e-05
Q9CYA0	Creld2	Protein disulfide isomerase Creld2	CREL2_MOUSE	0.182981	0.222863	0.999974	9.93055e-06
Q64674	Srm	Spermidine synthase	SPEE_MOUSE	-0.147953	0.223357	0.999974	0.000184977
Q9JHI7	Exosc9	Exosome complex component RRP45	EXOS9_MOUSE	-0.181659	0.223734	0.999974	5.95704e-06
Q8BG32	Psmd11	26S proteasome non-ATPase regulatory subunit 11	PSD11_MOUSE	-0.0928333	0.22412	0.999974	0.000117653
O55026	Entpd2	Ectonucleoside triphosphate diphosphohydrolase 2	ENTP2_MOUSE	0.0981055	0.224126	0.999974	7.672e-05
Q8CDM8	Fam160b1	Protein FAM160B1	F16B1_MOUSE	-0.281315	0.224338	0.999974	1.14318e-05
Q9CXR1	Dhrs7	Dehydrogenase/reductase SDR family member 7	DHRS7_MOUSE	0.194286	0.224374	0.999974	2.7167e-05
Q62443	Nptx1	Neuronal pentraxin-1	NPTX1_MOUSE	-0.140568	0.224414	0.999974	8.04919e-05
Q91VM3	Wdr45	WD repeat domain phosphoinositide-interacting protein 4	WIPI4_MOUSE	-0.202494	0.224538	0.999974	1.62126e-05
P23506	Pcmt1	Protein-L-isoaspartate(D-aspartate) O-methyltransferase	PIMT_MOUSE	0.153383	0.224822	0.999974	0.000417673
Q5SSL4	Abr	Active breakpoint cluster region-related protein	ABR_MOUSE	-0.133063	0.224935	0.999974	9.26169e-05
Q8BVA2	Tmem222	Transmembrane protein 222	TM222_MOUSE	0.157768	0.225214	0.999974	1.46397e-05
Q9D0R8	Lsm12	Protein LSM12 homolog	LSM12_MOUSE	-0.275095	0.225218	0.999974	2.65151e-05
P47915	Rpl29	60S ribosomal protein L29	RL29_MOUSE	-0.35741	0.22544	0.999974	4.98716e-05
P59325	Eif5	Eukaryotic translation initiation factor 5	IF5_MOUSE	-0.135213	0.225622	0.999974	9.36435e-05
P42232	Stat5b	Signal transducer and activator of transcription 5B	STA5B_MOUSE	-0.256954	0.22566	0.999974	1.09779e-05
Q62425	Ndufa4	Cytochrome c oxidase subunit NDUFA4	NDUA4_MOUSE	0.181391	0.22609	0.999974	0.00258216
Q3UV70	Pdp1	[Pyruvate dehydrogenase [acetyl-transferring]]-phosphatase 1, mitochondrial	PDP1_MOUSE	0.257198	0.226462	0.999974	4.91606e-05
Q9DAI2	Ift22	Intraflagellar transport protein 22 homolog	IFT22_MOUSE	-0.124259	0.226559	0.999974	2.12985e-05
Q9QYC0	Add1	Alpha-adducin	ADDA_MOUSE	-0.221497	0.226661	0.999974	0.00050065
Q921I1	Tf	Serotransferrin	TRFE_MOUSE	-0.565811	0.226728	0.999974	9.79256e-05
Q9DAW9	Cnn3	Calponin-3	CNN3_MOUSE	-0.319183	0.226817	0.999974	6.03911e-05
Q62261	Sptbn1	Spectrin beta chain, non-erythrocytic 1	SPTB2_MOUSE	0.0547181	0.226879	0.999974	0.000988891
Q9CRD0	Ociad1	OCIA domain-containing protein 1	OCAD1_MOUSE	0.0722296	0.227207	0.999974	9.23324e-05
Q60598	Cttn	Src substrate cortactin	SRC8_MOUSE	-0.30429	0.227265	0.999974	0.000314518
Q8CHG3	Gcc2	GRIP and coiled-coil domain-containing protein 2	GCC2_MOUSE	-0.066082	0.227635	0.999974	4.40569e-06
Q80XQ2	Tbc1d5	TBC1 domain family member 5	TBCD5_MOUSE	-0.28312	0.227761	0.999974	1.47748e-05
Q8BTZ4	Anapc5	Anaphase-promoting complex subunit 5	APC5_MOUSE	0.273061	0.228191	0.999974	4.951e-06
Q9DC63	Fbxo3	F-box only protein 3	FBX3_MOUSE	-0.140765	0.228296	0.999974	1.91208e-05
Q9DBR3	Armc8	Armadillo repeat-containing protein 8	ARMC8_MOUSE	-0.194486	0.228325	0.999974	2.19667e-05
Q6PGL7	Washc2	WASH complex subunit 2	WASC2_MOUSE	-0.145984	0.228674	0.999974	1.48231e-05
Q8R5A6	Tbc1d22a	TBC1 domain family member 22A	TB22A_MOUSE	-0.267416	0.228754	0.999974	3.38964e-06
P48722	Hspa4l	Heat shock 70 kDa protein 4L	HS74L_MOUSE	0.229516	0.229004	0.999974	0.000362941
Q924M7	Mpi	Mannose-6-phosphate isomerase	MPI_MOUSE	-0.0916344	0.229041	0.999974	0.000123924
Q3TRR0	Map9	Microtubule-associated protein 9	MAP9_MOUSE	-0.835314	0.229289	0.999974	3.97693e-06
P16125	Ldhb	L-lactate dehydrogenase B chain	LDHB_MOUSE	-0.241797	0.229376	0.999974	0.00279548
Q810A7	Ddx42	ATP-dependent RNA helicase DDX42	DDX42_MOUSE	-0.46788	0.229492	0.999974	2.10002e-05
Q8VCL2	Sco2	Protein SCO2 homolog, mitochondrial	SCO2_MOUSE	0.179573	0.229502	0.999974	8.89121e-06
P08249	Mdh2	Malate dehydrogenase, mitochondrial	MDHM_MOUSE	0.0934698	0.230267	0.999974	0.00413749
P60335	Pcbp1	Poly(rC)-binding protein 1	PCBP1_MOUSE	-0.105205	0.230565	0.999974	0.000402878
Q9D0A3	Arpin	Arpin	ARPIN_MOUSE	-0.148987	0.230806	0.999974	5.60578e-05
Q60676	Ppp5c	Serine/threonine-protein phosphatase 5	PPP5_MOUSE	-0.0499963	0.231511	0.999974	0.000114719
Q9CYW4	Hdhd3	Haloacid dehalogenase-like hydrolase domain-containing protein 3	HDHD3_MOUSE	-0.132404	0.231695	0.999974	3.47205e-05
Q91YD3	Dcp1a	mRNA-decapping enzyme 1A	DCP1A_MOUSE	-0.603491	0.232295	0.999974	1.07486e-06
O35551	Rabep1	Rab GTPase-binding effector protein 1	RABE1_MOUSE	-0.124672	0.232317	0.999974	4.19062e-05
Q8VDM4	Psmd2	26S proteasome non-ATPase regulatory subunit 2	PSMD2_MOUSE	-0.0440759	0.232388	0.999974	9.85659e-05
A2ALS5	Rap1gap	Rap1 GTPase-activating protein 1	RPGP1_MOUSE	-0.196432	0.232541	0.999974	0.000140592
Q6GYP7	Ralgapa1	Ral GTPase-activating protein subunit alpha-1	RGPA1_MOUSE	-0.108154	0.232622	0.999974	2.10092e-05
Q9CQC7	Ndufb4	NADH dehydrogenase [ubiquinone] 1 beta subcomplex subunit 4	NDUB4_MOUSE	0.106105	0.232639	0.999974	0.000413411
Q9DB10;Q9H4I9	Smdt1;SMDT1	Essential MCU regulator, mitochondrial;Essential MCU regulator, mitochondrial	EMRE_MOUSE;EMRE_HUMAN	-0.366816	0.233119	0.999974	3.8581e-05
Q8CCJ9	Phf20l1	PHD finger protein 20-like protein 1	P20L1_MOUSE	-0.761569	0.233394	0.999974	9.22502e-05
Q9JKP5	Mbnl1	Muscleblind-like protein 1	MBNL1_MOUSE	-0.248936	0.233535	0.999974	1.87797e-05
Q922H9	Znf330	Zinc finger protein 330	ZN330_MOUSE	-0.131701	0.233603	0.999974	2.52778e-06
Q6P9R4	Arhgef18	Rho guanine nucleotide exchange factor 18	ARHGI_MOUSE	-0.147089	0.233704	0.999974	3.10642e-06
Q8C7R4	Uba6	Ubiquitin-like modifier-activating enzyme 6	UBA6_MOUSE	-0.071437	0.233776	0.999974	2.9941e-05
Q7TMQ7	Wdr91	WD repeat-containing protein 91	WDR91_MOUSE	-0.198344	0.233864	0.999974	1.03698e-05
P63040	Cplx1	Complexin-1	CPLX1_MOUSE	-0.197921	0.234762	0.999974	0.0004438
Q3UIL6	Plekha7	Pleckstrin homology domain-containing family A member 7	PKHA7_MOUSE	-0.32012	0.235455	0.999974	3.14438e-06
Q8VDZ4	Zdhhc5	Palmitoyltransferase ZDHHC5	ZDHC5_MOUSE	-0.109159	0.235492	0.999974	1.60896e-05
O08553	Dpysl2	Dihydropyrimidinase-related protein 2	DPYL2_MOUSE	-0.225705	0.235744	0.999974	0.00703618
Q3U1F9	Pag1	Phosphoprotein associated with glycosphingolipid-enriched microdomains 1	PHAG1_MOUSE	-0.221088	0.235902	0.999974	9.74385e-06
Q9Z0P4	Palm	Paralemmin-1	PALM_MOUSE	-0.255142	0.23633	0.999974	0.000553991
Q9JKS5	Habp4	Intracellular hyaluronan-binding protein 4	HABP4_MOUSE	-0.437925	0.236353	0.999974	2.19084e-05
Q8BFR5	Tufm	Elongation factor Tu, mitochondrial	EFTU_MOUSE	0.0730126	0.236868	0.999974	0.000516145
Q9QYE6	Golga5	Golgin subfamily A member 5	GOGA5_MOUSE	-0.19016	0.236923	0.999974	4.16809e-06
Q80ZJ6	Zer1	Protein zer-1 homolog	ZER1_MOUSE	-0.130798	0.236948	0.999974	1.57279e-05
Q91ZX7	Lrp1	Prolow-density lipoprotein receptor-related protein 1	LRP1_MOUSE	0.128534	0.237074	0.999974	8.48421e-05
Q60854	Serpinb6	Serpin B6	SPB6_MOUSE	-0.05125	0.23754	0.999974	0.000116213
Q60870	Reep5	Receptor expression-enhancing protein 5	REEP5_MOUSE	0.0864308	0.237855	0.999974	0.000234357
Q8VE18	Smg8	Protein SMG8	SMG8_MOUSE	0.301309	0.237938	0.999974	1.74143e-06
P62307	Snrpf	Small nuclear ribonucleoprotein F	RUXF_MOUSE	-0.193034	0.238004	0.999974	2.60088e-05
Q9JKW0	Arl6ip1	ADP-ribosylation factor-like protein 6-interacting protein 1	AR6P1_MOUSE	0.442297	0.238217	0.999974	6.40565e-05
P42669	Pura	Transcriptional activator protein Pur-alpha	PURA_MOUSE	-0.113259	0.238553	0.999974	0.000335307
Q9CQE5	Rgs10	Regulator of G-protein signaling 10	RGS10_MOUSE	-0.0728727	0.239192	0.999974	3.33146e-05
Q8CI43	Myl6b	Myosin light chain 6B	MYL6B_MOUSE	0.276179	0.239433	0.999974	0.00022898
Q9QUN9	Dkk3	Dickkopf-related protein 3	DKK3_MOUSE	-0.817718	0.239529	0.999974	7.84163e-06
P70188	Kifap3	Kinesin-associated protein 3	KIFA3_MOUSE	-0.071104	0.239771	0.999974	2.66694e-05
Q61686	Cbx5	Chromobox protein homolog 5	CBX5_MOUSE	-0.272123	0.239816	0.999974	3.23066e-05
E9Q942	Smim13	Small integral membrane protein 13	SIM13_MOUSE	-0.188114	0.240268	0.999974	2.03739e-06
Q8BVI5	Stx16	Syntaxin-16	STX16_MOUSE	-0.0888254	0.240563	0.999974	2.71138e-05
Q8BMQ2	Gtf3c4	General transcription factor 3C polypeptide 4	TF3C4_MOUSE	-0.172774	0.240893	0.999974	3.49646e-06
Q9DAW6	Prpf4	U4/U6 small nuclear ribonucleoprotein Prp4	PRP4_MOUSE	-0.276034	0.240917	0.999974	4.7464e-06
Q05909	Ptprg	Receptor-type tyrosine-protein phosphatase gamma	PTPRG_MOUSE	-0.209339	0.241048	0.999974	8.93921e-06
Q59J78	Ndufaf2	NADH dehydrogenase [ubiquinone] 1 alpha subcomplex assembly factor 2	NDUF2_MOUSE	0.314231	0.241812	0.999974	0.000111909
P09103	P4hb	Protein disulfide-isomerase	PDIA1_MOUSE	0.0709995	0.242397	0.999974	0.000247517
Q8BJS4	Sun2	SUN domain-containing protein 2	SUN2_MOUSE	0.198225	0.242412	0.999974	7.88904e-06
Q9CZU3	Mtrex	Exosome RNA helicase MTR4	MTREX_MOUSE	-0.418071	0.243014	0.999974	2.60611e-06
P70399	Tp53bp1	TP53-binding protein 1	TP53B_MOUSE	-0.262581	0.243385	0.999974	1.98824e-05
Q811J3	Ireb2	Iron-responsive element-binding protein 2	IREB2_MOUSE	-0.0729799	0.243668	0.999974	6.0374e-06
P00405;Q37595,Q38S08,Q38S11,P50672,Q38S29,Q38S02,Q37547,Q38S35,Q38RV6,Q38S05,Q38RX1,Q38RU1,Q7IKU8,Q38S50	Mtco2;MT-CO2,MT-CO2,MT-CO2,MT-CO2,MT-CO2,MT-CO2,MT-CO2,MT-CO2,MT-CO2,MT-CO2,MT-CO2,MT-CO2,MT-CO2,MT-CO2	Cytochrome c oxidase subunit 2	COX2_MOUSE;COX2_PERFA,COX2_HYLPR,COX2_HYBUN,COX2_ACOWI,COX2_APOSM,COX2_LEMBA,COX2_MALTY,COX2_APOMY,COX2_RHAPU,COX2_LEGFO,COX2_PRAJA,COX2_ZELHI,COX2_MICTV,COX2_ACOIG	0.0939749	0.243952	0.999974	0.00287747
O70591	Pfdn2	Prefoldin subunit 2	PFD2_MOUSE	-0.0972871	0.243969	0.999974	0.00014572
Q9Z1F9	Uba2	SUMO-activating enzyme subunit 2	SAE2_MOUSE	-0.335243	0.244328	0.999974	4.86033e-05
Q9D6J5	Ndufb8	NADH dehydrogenase [ubiquinone] 1 beta subcomplex subunit 8, mitochondrial	NDUB8_MOUSE	0.0815759	0.244511	0.999974	0.00052187
A6H630	Armt1	Damage-control phosphatase ARMT1	ARMT1_MOUSE	-0.0996914	0.244581	0.999974	3.27621e-05
Q8BGB7	Enoph1	Enolase-phosphatase E1	ENOPH_MOUSE	-0.0830474	0.244723	0.999974	7.72317e-05
Q9D1F4	Akt1s1	Proline-rich AKT1 substrate 1	AKTS1_MOUSE	-0.143518	0.245243	0.999974	2.12182e-05
Q8BIQ5	Cstf2	Cleavage stimulation factor subunit 2	CSTF2_MOUSE	-0.136682	0.245285	0.999974	2.20771e-05
Q6PNC0	Dmxl1	DmX-like protein 1	DMXL1_MOUSE	-0.4625	0.245377	0.999974	9.25783e-06
Q9D6T0	Nosip	Nitric oxide synthase-interacting protein	NOSIP_MOUSE	-0.302608	0.245623	0.999974	2.27031e-06
Q71LX4	Tln2	Talin-2	TLN2_MOUSE	0.198304	0.246205	0.999974	0.000120932
Q8BQZ4	Ralgapb	Ral GTPase-activating protein subunit beta	RLGPB_MOUSE	0.117371	0.246249	0.999974	2.43932e-05
P70122	Sbds	Ribosome maturation protein SBDS	SBDS_MOUSE	-0.260534	0.246747	0.999974	3.0867e-05
Q8R3V5	Sh3glb2	Endophilin-B2	SHLB2_MOUSE	-0.0697485	0.246771	0.999974	0.000422574
Q8CI04	Cog3	Conserved oligomeric Golgi complex subunit 3	COG3_MOUSE	-0.137347	0.246979	0.999974	2.06772e-06
P56959	Fus	RNA-binding protein FUS	FUS_MOUSE	-0.406536	0.247013	0.999974	0.000247236
Q9Z2V6	Hdac5	Histone deacetylase 5	HDAC5_MOUSE	-0.303158	0.247155	0.999974	7.26936e-06
O35345	Kpna6	Importin subunit alpha-7	IMA7_MOUSE	-0.100199	0.247158	0.999974	4.30915e-05
Q91VW5	Golga4	Golgin subfamily A member 4	GOGA4_MOUSE	-0.279479	0.247834	0.999974	2.1611e-06
Q8K0D5	Gfm1	Elongation factor G, mitochondrial	EFGM_MOUSE	-0.252923	0.248034	0.999974	4.44931e-05
Q61074	Ppm1g	Protein phosphatase 1G	PPM1G_MOUSE	-0.341427	0.248155	0.999974	2.22109e-05
Q80TV8	Clasp1	CLIP-associating protein 1	CLAP1_MOUSE	0.133694	0.248268	0.999974	8.64864e-05
Q8BYL4	Yars2	Tyrosine--tRNA ligase, mitochondrial	SYYM_MOUSE	0.121104	0.248591	0.999974	2.41513e-05
Q8CHQ0	Fbxo4	F-box only protein 4	FBX4_MOUSE	-0.119347	0.248707	0.999974	3.23905e-06
Q8BFZ3	Actbl2	Beta-actin-like protein 2	ACTBL_MOUSE	-0.143504	0.249212	0.999974	4.82912e-05
Q9WVG6	Carm1	Histone-arginine methyltransferase CARM1	CARM1_MOUSE	-0.258417	0.249257	0.999974	1.22143e-05
A2RTL5	Rsrc2	Arginine/serine-rich coiled-coil protein 2	RSRC2_MOUSE	-0.363052	0.2495	0.999974	2.23819e-06
Q8BIJ6	Iars2	Isoleucine--tRNA ligase, mitochondrial	SYIM_MOUSE	0.0646929	0.249853	0.999974	0.000203556
O08784	Tcof1	Treacle protein	TCOF_MOUSE	-0.346501	0.249964	0.999974	6.37253e-06
Q9WTR5	Cdh13	Cadherin-13	CAD13_MOUSE	0.0633044	0.250749	0.999974	0.000152649
Q810B7	Slitrk5	SLIT and NTRK-like protein 5	SLIK5_MOUSE	-0.704283	0.250808	0.999974	4.16771e-06
Q8R0G9	Nup133	Nuclear pore complex protein Nup133	NU133_MOUSE	0.378086	0.251416	0.999974	6.49783e-06
Q6PD26	Pigs	GPI transamidase component PIG-S	PIGS_MOUSE	0.221804	0.251512	0.999974	1.76503e-05
P16254	Srp14	Signal recognition particle 14 kDa protein	SRP14_MOUSE	-0.211912	0.252062	0.999974	1.19331e-05
Q60770	Stxbp3	Syntaxin-binding protein 3	STXB3_MOUSE	-0.44331	0.252116	0.999974	0.000141169
P42859	Htt	Huntingtin	HD_MOUSE	-0.0846595	0.252582	0.999974	4.04384e-05
Q78PG9	Ccdc25	Coiled-coil domain-containing protein 25	CCD25_MOUSE	-0.541904	0.252642	0.999974	3.70785e-06
Q80UU9	Pgrmc2	Membrane-associated progesterone receptor component 2	PGRC2_MOUSE	0.0775348	0.252646	0.999974	0.000208517
Q80WJ7	Mtdh	Protein LYRIC	LYRIC_MOUSE	0.259905	0.253248	0.999974	8.04275e-05
Q9R0P4	Smap	Small acidic protein	SMAP_MOUSE	-0.586978	0.253415	0.999974	1.0611e-05
Q61578	Fdxr	NADPH:adrenodoxin oxidoreductase, mitochondrial	ADRO_MOUSE	0.102896	0.254226	0.999974	1.11113e-05
Q3UMT1	Ppp1r12c	Protein phosphatase 1 regulatory subunit 12C	PP12C_MOUSE	-0.406932	0.254497	0.999974	2.85029e-05
Q8R3L2	Tcf25	Transcription factor 25	TCF25_MOUSE	-0.275866	0.254808	0.999974	3.34657e-06
Q8BGZ2	Fam168a	Protein FAM168A	F168A_MOUSE	-0.216414	0.255157	0.999974	8.78237e-06
Q9Z1J3	Nfs1	Cysteine desulfurase, mitochondrial	NFS1_MOUSE	0.0334079	0.255532	0.999974	0.00011149
Q9ERB0	Snap29	Synaptosomal-associated protein 29	SNP29_MOUSE	0.0754306	0.255546	0.999974	3.41157e-05
Q9CW79	Golga1	Golgin subfamily A member 1	GOGA1_MOUSE	-0.263695	0.255861	0.999974	4.71199e-06
Q8C878	Uba3	NEDD8-activating enzyme E1 catalytic subunit	UBA3_MOUSE	-0.112111	0.256008	0.999974	6.03774e-05
P22437	Ptgs1	Prostaglandin G/H synthase 1	PGH1_MOUSE	0.322551	0.256081	0.999974	5.1551e-06
Q9QXA5	Lsm4	U6 snRNA-associated Sm-like protein LSm4	LSM4_MOUSE	-0.161683	0.256136	0.999974	3.60385e-05
Q8BLF1	Nceh1	Neutral cholesterol ester hydrolase 1	NCEH1_MOUSE	0.13521	0.256228	0.999974	0.000160132
P70677,P55213	Casp3	Caspase-3	CASP3_MOUSE,CASP3_RAT	-0.100687	0.2563	0.999974	9.01914e-06
Q6P5G6	Ubxn7	UBX domain-containing protein 7	UBXN7_MOUSE	-0.239439	0.256339	0.999974	1.21418e-05
P03899	Mtnd3	NADH-ubiquinone oxidoreductase chain 3	NU3M_MOUSE	0.0600483	0.25671	0.999974	0.000449968
Q6P2K6	Ppp4r3a	Serine/threonine-protein phosphatase 4 regulatory subunit 3A	P4R3A_MOUSE	-0.496586	0.256753	0.999974	2.11395e-06
Q3UHD2	Gfod1	Glucose-fructose oxidoreductase domain-containing protein 1	GFOD1_MOUSE	0.203464	0.256768	0.999974	1.61709e-05
Q9JIQ3	Diablo	Diablo homolog, mitochondrial	DBLOH_MOUSE	-0.0830742	0.256947	0.999974	1.23958e-05
Q8BHN3	Ganab	Neutral alpha-glucosidase AB	GANAB_MOUSE	0.0925662	0.25708	0.999974	0.000196355
Q91YQ3	Csdc2	Cold shock domain-containing protein C2	CSDC2_MOUSE	-0.22132	0.257177	0.999974	2.57262e-05
P02469	Lamb1	Laminin subunit beta-1	LAMB1_MOUSE	-0.209526	0.257186	0.999974	1.02687e-06
Q8VHI6	Wasf3	Wiskott-Aldrich syndrome protein family member 3	WASF3_MOUSE	-0.157081	0.257241	0.999974	8.85951e-05
Q9JIF0	Prmt1	Protein arginine N-methyltransferase 1	ANM1_MOUSE	-0.198183	0.257965	0.999974	6.49183e-05
Q9CRT8	Xpot	Exportin-T	XPOT_MOUSE	-0.239244	0.258082	0.999974	1.98228e-05
Q9JK81	Myg1	UPF0160 protein MYG1, mitochondrial	MYG1_MOUSE	-0.184147	0.258089	0.999974	2.88153e-05
Q8BHJ5	Tbl1xr1	F-box-like/WD repeat-containing protein TBL1XR1	TBL1R_MOUSE	-0.257331	0.258358	0.999974	7.04438e-06
P24549	Aldh1a1	Retinal dehydrogenase 1	AL1A1_MOUSE	-0.180238	0.258449	0.999974	0.000439006
Q91YN9	Bag2	BAG family molecular chaperone regulator 2	BAG2_MOUSE	0.270562	0.25857	0.999974	1.09029e-05
P35288	Rab23	Ras-related protein Rab-23	RAB23_MOUSE	-0.0433586	0.258681	0.999974	5.66782e-05
Q7TT37,Q8VHU4	Elp1	Elongator complex protein 1	ELP1_MOUSE,ELP1_RAT	-0.088022	0.258817	0.999974	3.11498e-05
Q5XI81,Q61584	Fxr1	Fragile X mental retardation syndrome-related protein 1	FXR1_RAT,FXR1_MOUSE	-0.163482	0.259216	0.999974	2.04354e-05
P84078;P61205	Arf1;Arf3	ADP-ribosylation factor 1;ADP-ribosylation factor 3	ARF1_MOUSE;ARF3_MOUSE	-0.146848	0.259607	0.999974	0.00131807
Q8BXJ9	Tmem62	Transmembrane protein 62	TMM62_MOUSE	0.121629	0.259797	0.999974	6.10545e-06
Q99KJ0	Ubxn2a	UBX domain-containing protein 2A	UBX2A_MOUSE	-0.400152	0.25988	0.999974	1.55235e-06
P61963	Dcaf7	DDB1- and CUL4-associated factor 7	DCAF7_MOUSE	-0.0719467	0.260455	0.999974	3.63767e-05
O89032	Sh3pxd2a	SH3 and PX domain-containing protein 2A	SPD2A_MOUSE	-0.177883	0.261574	0.999974	6.55977e-06
P70168	Kpnb1	Importin subunit beta-1	IMB1_MOUSE	-0.11279	0.261686	0.999974	0.000226877
Q8R2K1	Fuom	Fucose mutarotase	FUCM_MOUSE	0.806698	0.261744	0.999974	2.43252e-05
Q99M28	Rnps1	RNA-binding protein with serine-rich domain 1	RNPS1_MOUSE	0.212897	0.261783	0.999974	3.2623e-05
Q5EG47,P54645	Prkaa1	5'-AMP-activated protein kinase catalytic subunit alpha-1	AAPK1_MOUSE,AAPK1_RAT	-0.0460392	0.261879	0.999974	3.76532e-05
Q1HFZ0	Nsun2	RNA cytosine C(5)-methyltransferase NSUN2	NSUN2_MOUSE	-0.0820991	0.261989	0.999974	7.79879e-06
Q9JK45	Kcnq5	Potassium voltage-gated channel subfamily KQT member 5	KCNQ5_MOUSE	0.285022	0.262244	0.999974	9.30799e-07
O54931	Akap2	A-kinase anchor protein 2	AKAP2_MOUSE	-0.4065	0.262323	0.999974	1.75198e-05
Q9CQB5	Cisd2	CDGSH iron-sulfur domain-containing protein 2	CISD2_MOUSE	0.066593	0.262385	0.999974	6.57105e-05
Q9D6N5	Drap1	Dr1-associated corepressor	NC2A_MOUSE	-0.204529	0.262538	0.999974	1.65455e-05
Q99M31	Hspa14	Heat shock 70 kDa protein 14	HSP7E_MOUSE	-0.212215	0.262782	0.999974	2.77636e-05
Q8JZN5	Acad9	Complex I assembly factor ACAD9, mitochondrial	ACAD9_MOUSE	0.113764	0.263007	0.999974	0.000111318
Q9DB73	Cyb5r1	NADH-cytochrome b5 reductase 1	NB5R1_MOUSE	0.228328	0.26309	0.999974	0.000104019
Q9WUB0	Rbck1	RanBP-type and C3HC4-type zinc finger-containing protein 1	HOIL1_MOUSE	0.192991	0.263188	0.999974	1.28222e-05
Q78J03	Msrb2	Methionine-R-sulfoxide reductase B2, mitochondrial	MSRB2_MOUSE	0.0898767	0.263254	0.999974	2.9148e-05
P60853	Lzts1	Leucine zipper putative tumor suppressor 1	LZTS1_MOUSE	0.242444	0.263366	0.999974	2.00768e-05
Q8VEA4	Chchd4	Mitochondrial intermembrane space import and assembly protein 40	MIA40_MOUSE	0.0996453	0.263537	0.999974	6.27212e-05
Q99KU0	Vmp1	Vacuole membrane protein 1	VMP1_MOUSE	0.078393	0.263721	0.999974	2.23481e-05
P27671	Rasgrf1	Ras-specific guanine nucleotide-releasing factor 1	RGRF1_MOUSE	-0.211881	0.26374	0.999974	2.56444e-05
Q9CZQ9	Bbs5	Bardet-Biedl syndrome 5 protein homolog	BBS5_MOUSE	-1.34336	0.263972	0.999974	3.6892e-06
Q9CWN7	Cnot11	CCR4-NOT transcription complex subunit 11	CNO11_MOUSE	0.36878	0.264075	0.999974	4.83455e-06
Q99J45	Nrbp1	Nuclear receptor-binding protein	NRBP_MOUSE	-0.124248	0.264462	0.999974	1.86162e-05
Q3UD01	Atxn7l3b	Ataxin-7-like protein 3B	A7L3B_MOUSE	-0.267824	0.264958	0.999974	3.76408e-06
Q3UUQ7	Pgap1	GPI inositol-deacylase	PGAP1_MOUSE	0.0932948	0.265072	0.999974	1.56019e-05
Q8R104	Sirt3	NAD-dependent protein deacetylase sirtuin-3	SIR3_MOUSE	-0.0666537	0.265236	0.999974	9.4965e-06
Q9D7X8	Ggct	Gamma-glutamylcyclotransferase	GGCT_MOUSE	0.184915	0.265285	0.999974	6.6405e-05
O88531	Ppt1	Palmitoyl-protein thioesterase 1	PPT1_MOUSE	0.0640229	0.265639	0.999974	7.22754e-05
Q68ED2	Grm7	Metabotropic glutamate receptor 7	GRM7_MOUSE	0.112581	0.265656	0.999974	3.3015e-05
Q923Z0	Gprc5b	G-protein coupled receptor family C group 5 member B	GPC5B_MOUSE	-0.651349	0.265779	0.999974	3.8216e-05
Q9DC71	Mrps15	28S ribosomal protein S15, mitochondrial	RT15_MOUSE	0.0753583	0.265801	0.999974	3.60621e-05
Q69ZK0	Prex1	Phosphatidylinositol 3,4,5-trisphosphate-dependent Rac exchanger 1 protein	PREX1_MOUSE	-0.130334	0.26623	0.999974	9.96774e-06
P35279	Rab6a	Ras-related protein Rab-6A	RAB6A_MOUSE	-0.196298	0.266267	0.999974	0.000459894
Q8BG92	Clvs2	Clavesin-2	CLVS2_MOUSE	-0.186693	0.266441	0.999974	1.71442e-05
Q3ULJ0	Gpd1l	Glycerol-3-phosphate dehydrogenase 1-like protein	GPD1L_MOUSE	0.255993	0.266542	0.999974	0.000347928
P63038	Hspd1	60 kDa heat shock protein, mitochondrial	CH60_MOUSE	0.081705	0.266603	0.999974	0.00122924
Q9CQD1	Rab5a	Ras-related protein Rab-5A	RAB5A_MOUSE	-0.0854832	0.266837	0.999974	0.000540156
Q9D8N2	Dennd10	DENN domain-containing protein 10	DEN10_MOUSE	-0.113439	0.267252	0.999974	2.27969e-05
Q6PGH1	Bud31	Protein BUD31 homolog	BUD31_MOUSE	-0.211096	0.267259	0.999974	4.81595e-06
Q9ES56	Trappc4	Trafficking protein particle complex subunit 4	TPPC4_MOUSE	-0.105212	0.267274	0.999974	3.22705e-05
Q9QXT0	Cnpy2	Protein canopy homolog 2	CNPY2_MOUSE	0.0649512	0.267988	0.999974	7.9697e-05
Q9EQQ2	Yipf5	Protein YIPF5	YIPF5_MOUSE	0.151308	0.268042	0.999974	1.88997e-05
Q9CQU0	Txndc12	Thioredoxin domain-containing protein 12	TXD12_MOUSE	0.056708	0.268242	0.999974	4.20457e-05
Q80ZK0	Mrps10	28S ribosomal protein S10, mitochondrial	RT10_MOUSE	0.205258	0.268583	0.999974	1.22235e-05
P56812	Pdcd5	Programmed cell death protein 5	PDCD5_MOUSE	0.492476	0.268733	0.999974	0.000146716
Q9Z0L0	Tpbg	Trophoblast glycoprotein	TPBG_MOUSE	0.199474	0.269139	0.999974	3.1248e-05
Q6KAU4	Mvb12b	Multivesicular body subunit 12B	MB12B_MOUSE	-0.0731123	0.269184	0.999974	1.54246e-05
Q9CQ00	Dmac1	Distal membrane-arm assembly complex protein 1	DMAC1_MOUSE	0.20783	0.269479	0.999974	1.17848e-05
Q3UPH1	Prrc1	Protein PRRC1	PRRC1_MOUSE	-0.249313	0.269966	0.999974	8.30428e-06
Q9D0K0	Tbc1d7	TBC1 domain family member 7	TBCD7_MOUSE	0.410231	0.269972	0.999974	9.11195e-06
O08740	Polr2j	DNA-directed RNA polymerase II subunit RPB11	RPB11_MOUSE	-0.0957542	0.270207	0.999974	7.27399e-06
P26516	Psmd7	26S proteasome non-ATPase regulatory subunit 7	PSMD7_MOUSE	-0.0524026	0.270274	0.999974	7.5163e-05
P14148	Rpl7	60S ribosomal protein L7	RL7_MOUSE	-0.332396	0.270467	0.999974	8.49806e-05
O70310	Nmt1	Glycylpeptide N-tetradecanoyltransferase 1	NMT1_MOUSE	-0.20938	0.270537	0.999974	3.83367e-05
Q6PCN3	Ttbk1	Tau-tubulin kinase 1	TTBK1_MOUSE	-0.229975	0.271294	0.999974	1.26419e-05
Q922Q9	Chid1	Chitinase domain-containing protein 1	CHID1_MOUSE	0.168285	0.271502	0.999974	1.28046e-05
O89086	Rbm3	RNA-binding protein 3	RBM3_MOUSE	-0.275916	0.271578	0.999974	3.07853e-05
Q8CG72	Adprhl2	ADP-ribose glycohydrolase ARH3	ARHL2_MOUSE	-0.118405	0.271771	0.999974	4.7227e-05
Q8CA72	Gan	Gigaxonin	GAN_MOUSE	0.0694636	0.271893	0.999974	6.94113e-06
Q06180	Ptpn2	Tyrosine-protein phosphatase non-receptor type 2	PTN2_MOUSE	-0.374583	0.272073	0.999974	5.09814e-06
Q9D2N9	Vps33a	Vacuolar protein sorting-associated protein 33A	VP33A_MOUSE	0.114936	0.272262	0.999974	3.23186e-05
Q6QWF9	Camk2n1	Calcium/calmodulin-dependent protein kinase II inhibitor 1	CK2N1_MOUSE	-0.734221	0.272353	0.999974	1.85628e-05
Q8R4N0	Clybl	Citramalyl-CoA lyase, mitochondrial	CLYBL_MOUSE	0.0934786	0.273713	0.999974	9.29105e-05
B1AWN6	Scn2a	Sodium channel protein type 2 subunit alpha	SCN2A_MOUSE	0.120253	0.273849	0.999974	0.000241727
Q8BZA9	Tigar	Fructose-2,6-bisphosphatase TIGAR	TIGAR_MOUSE	-0.124576	0.273999	0.999974	2.72594e-05
Q62074	Prkci	Protein kinase C iota type	KPCI_MOUSE	-0.237475	0.274153	0.999974	4.19981e-06
Q99K01	Pdxdc1	Pyridoxal-dependent decarboxylase domain-containing protein 1	PDXD1_MOUSE	-0.261823	0.274408	0.999974	2.60712e-05
Q9D7A8	Armc1	Armadillo repeat-containing protein 1	ARMC1_MOUSE	-0.129131	0.274482	0.999974	0.000114228
Q61598	Gdi2	Rab GDP dissociation inhibitor beta	GDIB_MOUSE	-0.0709929	0.274521	0.999974	0.00103756
Q8BG81	Poldip3	Polymerase delta-interacting protein 3	PDIP3_MOUSE	-0.561122	0.274574	0.999974	7.45745e-06
Q8BKZ9	Pdhx	Pyruvate dehydrogenase protein X component, mitochondrial	ODPX_MOUSE	0.0604876	0.274612	0.999974	0.000241536
P23116	Eif3a	Eukaryotic translation initiation factor 3 subunit A	EIF3A_MOUSE	-0.140849	0.274818	0.999974	4.60934e-05
O88851	Rbbp9	Putative hydrolase RBBP9	RBBP9_MOUSE	0.116989	0.275028	0.999974	0.000144011
A6H6A9	Rabgap1l	Rab GTPase-activating protein 1-like	RBG1L_MOUSE	-0.0931061	0.275352	0.999974	1.06356e-05
Q8BXA0	Lrfn5	Leucine-rich repeat and fibronectin type-III domain-containing protein 5	LRFN5_MOUSE	-0.196052	0.275792	0.999974	3.85875e-06
Q3UBX0	Tmem109	Transmembrane protein 109	TM109_MOUSE	-0.0687967	0.27611	0.999974	5.45508e-05
Q60864	Stip1	Stress-induced-phosphoprotein 1	STIP1_MOUSE	-0.122095	0.276207	0.999974	0.000802179
Q6DIB5	Megf10	Multiple epidermal growth factor-like domains protein 10	MEG10_MOUSE	-0.331782	0.276796	0.999974	3.99644e-06
Q3U3Q1	Ulk3	Serine/threonine-protein kinase ULK3	ULK3_MOUSE	-0.111747	0.277367	0.999974	9.43609e-06
Q9DCM7	Nacc2	Nucleus accumbens-associated protein 2	NACC2_MOUSE	-0.358733	0.277689	0.999974	1.9794e-06
Q7TMM9	Tubb2a	Tubulin beta-2A chain	TBB2A_MOUSE	0.0723433	0.27776	0.999974	0.00233049
Q9WVQ5	Apip	Methylthioribulose-1-phosphate dehydratase	MTNB_MOUSE	-0.281136	0.277778	0.999974	1.16691e-05
Q91W90	Txndc5	Thioredoxin domain-containing protein 5	TXND5_MOUSE	0.0904072	0.278446	0.999974	5.11849e-05
O08583	Alyref	THO complex subunit 4	THOC4_MOUSE	-0.249651	0.278459	0.999974	5.83986e-05
P31977,P26040	Ezr	Ezrin	EZRI_RAT,EZRI_MOUSE	0.618463	0.278523	0.999974	8.14332e-05
Q9DBX3	Susd2	Sushi domain-containing protein 2	SUSD2_MOUSE	0.110412	0.278717	0.999974	2.38304e-05
Q9JIA1	Lgi1	Leucine-rich glioma-inactivated protein 1	LGI1_MOUSE	0.123414	0.278855	0.999974	0.000430247
Q6NZB0	Dnajc8	DnaJ homolog subfamily C member 8	DNJC8_MOUSE	-0.2009	0.279047	0.999974	3.30513e-05
Q924N4	Slc12a6	Solute carrier family 12 member 6	S12A6_MOUSE	-0.0444504	0.279343	0.999974	3.12518e-05
Q8R2U4	Ntmt1	N-terminal Xaa-Pro-Lys N-methyltransferase 1	NTM1A_MOUSE	-0.165703	0.280048	0.999974	5.2001e-06
Q6PAK3	Prmt8	Protein arginine N-methyltransferase 8	ANM8_MOUSE	-0.275851	0.280429	0.999974	5.80833e-05
P40630	Tfam	Transcription factor A, mitochondrial	TFAM_MOUSE	0.0998948	0.280511	0.999974	0.000106462
Q9D6R2	Idh3a	Isocitrate dehydrogenase [NAD] subunit alpha, mitochondrial	IDH3A_MOUSE	0.0740427	0.280966	0.999974	0.00266814
Q9DBL7	Coasy	Bifunctional coenzyme A synthase	COASY_MOUSE	-0.0924775	0.2811	0.999974	4.22833e-05
P10605	Ctsb	Cathepsin B	CATB_MOUSE	-0.0584674	0.281374	0.999974	0.000238506
Q9D820	Prorsd1	Prolyl-tRNA synthetase associated domain-containing protein 1	PRXD1_MOUSE	0.426498	0.281398	0.999974	3.34572e-06
O35927	Ctnnd2	Catenin delta-2	CTND2_MOUSE	-0.17006	0.281676	0.999974	9.95167e-05
Q7TNE1	Sugct	Succinate--hydroxymethylglutarate CoA-transferase	SUCHY_MOUSE	0.49113	0.281918	0.999974	1.08563e-06
Q9QYI5	Dnajb2	DnaJ homolog subfamily B member 2	DNJB2_MOUSE	0.103848	0.282193	0.999974	0.000117666
P50396	Gdi1	Rab GDP dissociation inhibitor alpha	GDIA_MOUSE	-0.0557767	0.282216	0.999974	0.00112404
Q91ZP9	Necab2	N-terminal EF-hand calcium-binding protein 2	NECA2_MOUSE	-0.206375	0.282706	0.999974	0.000143931
Q8CIG8	Prmt5	Protein arginine N-methyltransferase 5	ANM5_MOUSE	-0.0406087	0.283139	0.999974	6.65287e-05
Q8K1A6	Cc2d1a	Coiled-coil and C2 domain-containing protein 1A	C2D1A_MOUSE	-0.0796284	0.283158	0.999974	2.14513e-05
Q9CWL8	Ctnnbl1	Beta-catenin-like protein 1	CTBL1_MOUSE	-0.28438	0.283189	0.999974	1.26994e-05
Q811C2	Atg4c	Cysteine protease ATG4C	ATG4C_MOUSE	-0.0876346	0.283743	0.999974	9.13226e-06
Q9JIP4	Panx1	Pannexin-1	PANX1_MOUSE	-0.261588	0.283779	0.999974	1.67065e-06
P83510	Tnik	Traf2 and NCK-interacting protein kinase	TNIK_MOUSE	-0.288051	0.284113	0.999974	4.6887e-05
Q9WU60	Atrn	Attractin	ATRN_MOUSE	0.0988586	0.284717	0.999974	1.06327e-05
Q9CQ92	Fis1	Mitochondrial fission 1 protein	FIS1_MOUSE	0.130099	0.284798	0.999974	0.000170444
Q80VD1	Fam98b	Protein FAM98B	FA98B_MOUSE	-0.277049	0.284922	0.999974	4.17978e-05
Q3U2A8	Vars2	Valine--tRNA ligase, mitochondrial	SYVM_MOUSE	1.39922	0.285534	0.999974	3.79082e-05
Q80U93	Nup214	Nuclear pore complex protein Nup214	NU214_MOUSE	-0.37152	0.285978	0.999974	5.75808e-06
Q09LZ8	Agbl4	Cytosolic carboxypeptidase 6	CBPC6_MOUSE	0.336522	0.286065	0.999974	7.31563e-06
P46718	Pdcd2	Programmed cell death protein 2	PDCD2_MOUSE	-0.303734	0.286229	0.999974	2.47787e-06
O54781	Srpk2	SRSF protein kinase 2	SRPK2_MOUSE	-0.297485	0.286254	0.999974	4.45718e-05
Q9CWP6	Mospd2	Motile sperm domain-containing protein 2	MSPD2_MOUSE	-0.130253	0.286438	0.999974	5.98201e-06
P16014	Chgb	Secretogranin-1	SCG1_MOUSE	-0.155446	0.287919	0.999974	2.93009e-05
Q99L43	Cds2	Phosphatidate cytidylyltransferase 2	CDS2_MOUSE	0.169044	0.288129	0.999974	0.00019936
Q8BU11	Tox4	TOX high mobility group box family member 4	TOX4_MOUSE	-0.76279	0.288171	0.999974	2.1654e-06
G3X9K3	Arfgef1	Brefeldin A-inhibited guanine nucleotide-exchange protein 1	BIG1_MOUSE	0.156625	0.288388	0.999974	2.30056e-05
Q3UTD9	Smim15	Small integral membrane protein 15	SIM15_MOUSE	-0.201223	0.288623	0.999974	1.31773e-05
Q921F2	Tardbp	TAR DNA-binding protein 43	TADBP_MOUSE	-0.202732	0.28876	0.999974	0.000181598
O35566	Cd151	CD151 antigen	CD151_MOUSE	0.441324	0.288763	0.999974	2.4544e-05
Q8BZQ7	Anapc2	Anaphase-promoting complex subunit 2	ANC2_MOUSE	-0.0810633	0.289086	0.999974	8.77044e-06
Q60963	Pla2g7	Platelet-activating factor acetylhydrolase	PAFA_MOUSE	-0.628065	0.289133	0.999974	1.36981e-05
Q9CQI6	Cotl1	Coactosin-like protein	COTL1_MOUSE	-0.0473691	0.289166	0.999974	0.000227167
Q8K2C6	Sirt5	NAD-dependent protein deacylase sirtuin-5, mitochondrial	SIR5_MOUSE	0.103002	0.289465	0.999974	5.36603e-05
Q2YDW2	Msto1	Protein misato homolog 1	MSTO1_MOUSE	-0.235523	0.289702	0.999974	5.88182e-06
Q9CXW2	Mrps22	28S ribosomal protein S22, mitochondrial	RT22_MOUSE	0.0447708	0.290056	0.999974	2.99657e-05
Q8K3J1	Ndufs8	NADH dehydrogenase [ubiquinone] iron-sulfur protein 8, mitochondrial	NDUS8_MOUSE	0.0599696	0.290182	0.999974	0.000714211
Q9WTU6	Mapk9	Mitogen-activated protein kinase 9	MK09_MOUSE	-0.169102	0.290305	0.999974	6.15502e-05
Q69Z89	Radil	Ras-associating and dilute domain-containing protein	RADIL_MOUSE	-0.381003	0.290478	0.999974	1.22948e-06
Q8BG02	Ppp2r2c	Serine/threonine-protein phosphatase 2A 55 kDa regulatory subunit B gamma isoform	2ABG_MOUSE	-0.185288	0.290639	0.999974	9.22323e-06
Q99JG2	Gpr37l1	G-protein coupled receptor 37-like 1	G37L1_MOUSE	-0.0921375	0.291179	0.999974	0.000154762
Q3UHH2	Slc22a23	Solute carrier family 22 member 23	S22AN_MOUSE	0.106905	0.29121	0.999974	3.02054e-05
O09167	Rpl21	60S ribosomal protein L21	RL21_MOUSE	0.170401	0.291599	0.999974	8.42115e-05
P62838;P61079	Ube2d2;Ube2d3	Ubiquitin-conjugating enzyme E2 D2;Ubiquitin-conjugating enzyme E2 D3	UB2D2_MOUSE;UB2D3_MOUSE	-0.130678	0.291612	0.999974	0.000171434
Q9CXZ1	Ndufs4	NADH dehydrogenase [ubiquinone] iron-sulfur protein 4, mitochondrial	NDUS4_MOUSE	0.230622	0.291656	0.999974	0.000330055
Q8BXA5	Clptm1l	Cleft lip and palate transmembrane protein 1-like protein	CLP1L_MOUSE	0.0875432	0.291818	0.999974	9.59115e-06
Q9CRD4	Dbndd2	Dysbindin domain-containing protein 2	DBND2_MOUSE	-0.681544	0.291976	0.999974	2.79109e-05
Q8BGT7	Smndc1	Survival of motor neuron-related-splicing factor 30	SPF30_MOUSE	-0.330125	0.292084	0.999974	6.10188e-06
Q8BW22	Ss18l1	Calcium-responsive transactivator	CREST_MOUSE	-0.329457	0.292188	0.999974	9.46041e-06
Q8CJ61	Cmtm4	CKLF-like MARVEL transmembrane domain-containing protein 4	CKLF4_MOUSE	0.361255	0.29226	0.999974	4.43144e-05
Q923D5	Wbp11	WW domain-binding protein 11	WBP11_MOUSE	-0.456388	0.292764	0.999974	1.25164e-05
Q9R0I7	Ylpm1	YLP motif-containing protein 1	YLPM1_MOUSE	-0.402966	0.293152	0.999974	2.26372e-06
Q8CHH9	Septin8	Septin-8	SEPT8_MOUSE	0.0541895	0.29322	0.999974	0.000412703
P60882	Megf8	Multiple epidermal growth factor-like domains protein 8	MEGF8_MOUSE	0.416557	0.293607	0.999974	2.08934e-06
Q9D0M3	Cyc1	Cytochrome c1, heme protein, mitochondrial	CY1_MOUSE	-0.0479285	0.293678	0.999974	0.00114078
Q9JIG8	Praf2	PRA1 family protein 2	PRAF2_MOUSE	0.128971	0.294097	0.999974	0.000131341
O70435	Psma3	Proteasome subunit alpha type-3	PSA3_MOUSE	-0.0616026	0.294127	0.999974	0.000260057
Q80TM6	R3hdm2	R3H domain-containing protein 2	R3HD2_MOUSE	-0.332457	0.29436	0.999974	7.89922e-06
P97820	Map4k4	Mitogen-activated protein kinase kinase kinase kinase 4	M4K4_MOUSE	-0.112451	0.295032	0.999974	7.09233e-06
Q8C4B4	Unc119b	Protein unc-119 homolog B	U119B_MOUSE	-0.16574	0.29525	0.999974	4.34533e-06
Q6KC51,Q8BL65	Ablim2	Actin-binding LIM protein 2	ABLM2_RAT,ABLM2_MOUSE	-0.417987	0.295498	0.999974	9.3605e-05
Q8BMJ3	Eif1ax	Eukaryotic translation initiation factor 1A, X-chromosomal	IF1AX_MOUSE	-0.268691	0.295509	0.999974	1.41655e-05
P97470	Ppp4c	Serine/threonine-protein phosphatase 4 catalytic subunit	PP4C_MOUSE	-0.206473	0.295824	0.999974	1.64139e-05
A2A8Z1	Osbpl9	Oxysterol-binding protein-related protein 9	OSBL9_MOUSE	-0.184567	0.296135	0.999974	1.02214e-05
P97927	Lama4	Laminin subunit alpha-4	LAMA4_MOUSE	0.255168	0.29622	0.999974	1.08187e-05
Q80YV2	Zc3hc1	Nuclear-interacting partner of ALK	NIPA_MOUSE	-0.330938	0.297224	0.999974	6.54914e-06
Q9Z1K6	Arih2	E3 ubiquitin-protein ligase ARIH2	ARI2_MOUSE	-0.149673	0.297302	0.999974	5.97033e-06
Q80W14	Prpf40b	Pre-mRNA-processing factor 40 homolog B	PR40B_MOUSE	-0.47463	0.297319	0.999974	6.32361e-07
Q02563,Q9JIS5	Sv2a	Synaptic vesicle glycoprotein 2A	SV2A_RAT,SV2A_MOUSE	0.128613	0.297345	0.999974	0.00087943
Q569Z5	Ddx46	Probable ATP-dependent RNA helicase DDX46	DDX46_MOUSE	-0.260735	0.297484	0.999974	7.49192e-06
Q9JIG4	Ppp1r3f	Protein phosphatase 1 regulatory subunit 3F	PPR3F_MOUSE	-0.11713	0.297506	0.999974	1.53909e-05
O35609	Scamp3	Secretory carrier-associated membrane protein 3	SCAM3_MOUSE	-0.0579126	0.297655	0.999974	5.28834e-05
Q8BWT1	Acaa2	3-ketoacyl-CoA thiolase, mitochondrial	THIM_MOUSE	0.0743902	0.297891	0.999974	0.000228391
Q4JIM5	Abl2	Tyrosine-protein kinase ABL2	ABL2_MOUSE	-0.253034	0.297949	0.999974	1.75424e-05
Q6P2L7	Casc4	Protein CASC4	CASC4_MOUSE	0.189808	0.298083	0.999974	5.37623e-06
Q80WT0	Jph4	Junctophilin-4	JPH4_MOUSE	-0.398111	0.298235	0.999974	1.4213e-05
Q9QXY7	Xk	Membrane transport protein XK	XK_MOUSE	-0.36481	0.299344	0.999974	2.6632e-06
Q99JF5	Mvd	Diphosphomevalonate decarboxylase	MVD1_MOUSE	-0.17682	0.299756	0.999974	1.41385e-05
Q9QY15	Ddx25	ATP-dependent RNA helicase DDX25	DDX25_MOUSE	-0.235303	0.299803	0.999974	9.83142e-06
Q64373	Bcl2l1	Bcl-2-like protein 1	B2CL1_MOUSE	-0.176505	0.299826	0.999974	2.47611e-05
Q6DVA0	Lemd2	LEM domain-containing protein 2	LEMD2_MOUSE	-0.160907	0.299928	0.999974	8.38629e-06
Q9QZ08	Nagk	N-acetyl-D-glucosamine kinase	NAGK_MOUSE	-0.155483	0.300382	0.999974	6.51406e-05
G5E8K5	Ank3	Ankyrin-3	ANK3_MOUSE	-0.0601699	0.30049	0.999974	0.000316695
Q61545	Ewsr1	RNA-binding protein EWS	EWS_MOUSE	-0.34195	0.300532	0.999974	9.79855e-05
P35505	Fah	Fumarylacetoacetase	FAAA_MOUSE	0.531699	0.300582	0.999974	0.000114657
Q505F5	Lrrc47	Leucine-rich repeat-containing protein 47	LRC47_MOUSE	-0.0832576	0.300587	0.999974	5.09375e-05
P62192	Psmc1	26S proteasome regulatory subunit 4	PRS4_MOUSE	-0.0493257	0.300863	0.999974	0.000152783
Q9QZD8	Slc25a10	Mitochondrial dicarboxylate carrier	DIC_MOUSE	0.122944	0.300892	0.999974	3.6931e-05
Q99P47	Cntnap4	Contactin-associated protein-like 4	CNTP4_MOUSE	-0.139946	0.301001	0.999974	1.74623e-05
Q6NSR8	Npepl1	Probable aminopeptidase NPEPL1	PEPL1_MOUSE	0.831848	0.301083	0.999974	2.08361e-06
Q9DB75	Cdip1	Cell death-inducing p53-target protein 1	CDIP1_MOUSE	0.227015	0.30123	0.999974	0.000104686
Q3UHH1	Zswim8	Zinc finger SWIM domain-containing protein 8	ZSWM8_MOUSE	-0.135101	0.301238	0.999974	3.95064e-06
Q3UNH4	Gprin1	G protein-regulated inducer of neurite outgrowth 1	GRIN1_MOUSE	-0.244948	0.301601	0.999974	7.85737e-05
Q9CQJ8	Ndufb9	NADH dehydrogenase [ubiquinone] 1 beta subcomplex subunit 9	NDUB9_MOUSE	0.0853701	0.301621	0.999974	0.000379895
Q3U898	Cops9	COP9 signalosome complex subunit 9	CSN9_MOUSE	-0.654257	0.302536	0.999974	9.32926e-06
Q9EPQ8	Tcf20	Transcription factor 20	TCF20_MOUSE	-1.32847	0.302561	0.999974	6.88521e-07
Q91VH2	Snx9	Sorting nexin-9	SNX9_MOUSE	0.212108	0.302899	0.999974	3.63412e-06
Q9CQM5	Txndc17	Thioredoxin domain-containing protein 17	TXD17_MOUSE	-0.0594151	0.302954	0.999974	0.00015386
Q61016	Gng7	Guanine nucleotide-binding protein G(I)/G(S)/G(O) subunit gamma-7	GBG7_MOUSE	0.402631	0.30396	0.999974	0.00159337
Q61210,Q9Z1I6	Arhgef1	Rho guanine nucleotide exchange factor 1	ARHG1_MOUSE,ARHG1_RAT	-0.196422	0.304122	0.999974	3.93237e-06
Q9Z315	Sart1	U4/U6.U5 tri-snRNP-associated protein 1	SNUT1_MOUSE	0.686416	0.304301	0.999974	1.5068e-05
Q9Z0S1	Bpnt1	3'(2'),5'-bisphosphate nucleotidase 1	BPNT1_MOUSE	-0.276147	0.30442	0.999974	0.000198242
P61226	Rap2b	Ras-related protein Rap-2b	RAP2B_MOUSE	0.287374	0.304473	0.999974	0.000229725
Q9JME5	Ap3b2	AP-3 complex subunit beta-2	AP3B2_MOUSE	0.190757	0.304528	0.999974	0.000202549
P20444	Prkca	Protein kinase C alpha type	KPCA_MOUSE	-0.45306	0.304743	0.999974	0.000115835
Q9CRC9	Gnpda2	Glucosamine-6-phosphate isomerase 2	GNPI2_MOUSE	-0.166104	0.305136	0.999974	2.71947e-05
Q6A0D4	Rftn1	Raftlin	RFTN1_MOUSE	-0.359704	0.305437	0.999974	7.10629e-06
Q920E5	Fdps	Farnesyl pyrophosphate synthase	FPPS_MOUSE	-0.0902764	0.305489	0.999974	7.08547e-05
Q3TIR1	Trappc13	Trafficking protein particle complex subunit 13	TPC13_MOUSE	0.157766	0.305931	0.999974	1.98305e-05
Q8BK64	Ahsa1	Activator of 90 kDa heat shock protein ATPase homolog 1	AHSA1_MOUSE	-0.180465	0.305999	0.999974	0.00018407
P50543	S100a11	Protein S100-A11	S10AB_MOUSE	0.797613	0.306337	0.999974	1.53974e-05
P16332	Mmut	Methylmalonyl-CoA mutase, mitochondrial	MUTA_MOUSE	0.0586556	0.306626	0.999974	7.80261e-05
Q9WU79	Prodh	Proline dehydrogenase 1, mitochondrial	PROD_MOUSE	0.0447606	0.307512	0.999974	2.85567e-05
Q8VED9	Lgalsl	Galectin-related protein	LEGL_MOUSE	-0.0596639	0.307512	0.999974	0.000192822
Q9CR25	Dph2	2-(3-amino-3-carboxypropyl)histidine synthase subunit 2	DPH2_MOUSE	-0.447322	0.307855	0.999974	1.65942e-06
Q07079	Igfbp5	Insulin-like growth factor-binding protein 5	IBP5_MOUSE	-0.264287	0.30789	0.999974	1.04725e-05
Q9QX47	Son	Protein SON	SON_MOUSE	-0.156728	0.308132	0.999974	1.81944e-05
Q8BGQ1	Vipas39	Spermatogenesis-defective protein 39 homolog	SPE39_MOUSE	-0.053338	0.308227	0.999974	2.79943e-05
P18760	Cfl1	Cofilin-1	COF1_MOUSE	-0.0727408	0.308349	0.999974	0.00353718
Q9DAT5	Trmu	Mitochondrial tRNA-specific 2-thiouridylase 1	MTU1_MOUSE	0.110203	0.30929	0.999974	5.85049e-06
P17879	Hspa1b	Heat shock 70 kDa protein 1B	HS71B_MOUSE	0.1872	0.309291	0.999974	2.29965e-05
Q6P069	Sri	Sorcin	SORCN_MOUSE	0.166196	0.309354	0.999974	0.000191483
Q61072	Adam9	Disintegrin and metalloproteinase domain-containing protein 9	ADAM9_MOUSE	0.0976105	0.309402	0.999974	6.87017e-06
Q921Q3	Alg1	Chitobiosyldiphosphodolichol beta-mannosyltransferase	ALG1_MOUSE	0.193439	0.309476	0.999974	5.87823e-06
Q8CHX7	Rftn2	Raftlin-2	RFTN2_MOUSE	-0.13389	0.309642	0.999974	2.57803e-05
Q69ZK9	Nlgn2	Neuroligin-2	NLGN2_MOUSE	-0.0632482	0.309866	0.999974	9.83522e-05
P63017	Hspa8	Heat shock cognate 71 kDa protein	HSP7C_MOUSE	-0.0562253	0.31034	0.999974	0.00372852
Q69ZR2	Hectd1	E3 ubiquitin-protein ligase HECTD1	HECD1_MOUSE	-0.0958852	0.310373	0.999974	1.62669e-05
Q62186	Ssr4	Translocon-associated protein subunit delta	SSRD_MOUSE	-0.107148	0.310537	0.999974	2.83452e-05
Q60930	Vdac2	Voltage-dependent anion-selective channel protein 2	VDAC2_MOUSE	0.0557242	0.310637	0.999974	0.00205277
P58389	Ptpa	Serine/threonine-protein phosphatase 2A activator	PTPA_MOUSE	-0.0742043	0.310821	0.999974	0.000325443
O70340	Nptx2	Neuronal pentraxin-2	NPTX2_MOUSE	-0.343914	0.31095	0.999974	7.85782e-06
Q80SY4	Mib1	E3 ubiquitin-protein ligase MIB1	MIB1_MOUSE	-0.129377	0.311001	0.999974	3.53208e-06
F1MAD2,Q63ZW7	Patj	InaD-like protein	INADL_RAT,INADL_MOUSE	-0.648313	0.311132	0.999974	2.63958e-06
Q9JKN6	Nova1	RNA-binding protein Nova-1	NOVA1_MOUSE	-0.356756	0.311452	0.999974	5.11537e-05
Q8R3Y8	Irf2bp1	Interferon regulatory factor 2-binding protein 1	I2BP1_MOUSE	-0.293991	0.31157	0.999974	2.63221e-06
P62270	Rps18	40S ribosomal protein S18	RS18_MOUSE	0.173456	0.311577	0.999974	0.000182449
Q8BG73	Sh3bgrl2	SH3 domain-binding glutamic acid-rich-like protein 2	SH3L2_MOUSE	-0.0897446	0.3116	0.999974	0.000126311
Q8BKV0	Spock3	Testican-3	TICN3_MOUSE	-0.169138	0.311647	0.999974	3.76417e-06
Q9R0K7	Atp2b2	Plasma membrane calcium-transporting ATPase 2	AT2B2_MOUSE	0.114401	0.311933	0.999974	0.000546918
Q9R1S8	Capn7	Calpain-7	CAN7_MOUSE	0.392027	0.312768	0.999974	4.37474e-06
Q9Z1S8	Gab2	GRB2-associated-binding protein 2	GAB2_MOUSE	-0.120159	0.313229	0.999974	2.22722e-06
P09925	Surf1	Surfeit locus protein 1	SURF1_MOUSE	0.18472	0.313341	0.999974	1.94438e-05
P21708,Q63844	Mapk3	Mitogen-activated protein kinase 3	MK03_RAT,MK03_MOUSE	-0.0527901	0.313417	0.999974	0.000393669
Q8K3I4	Myrip	Rab effector MyRIP	MYRIP_MOUSE	-0.324106	0.314068	0.999974	2.81022e-06
Q9EPU4	Cpsf1	Cleavage and polyadenylation specificity factor subunit 1	CPSF1_MOUSE	-0.209197	0.314388	0.999974	3.14629e-06
O08747	Unc5c	Netrin receptor UNC5C	UNC5C_MOUSE	-1.46867	0.31449	0.999974	7.82566e-06
Q9WVL2	Stat2	Signal transducer and activator of transcription 2	STAT2_MOUSE	-0.13467	0.314507	0.999974	1.28002e-06
Q922V4	Plrg1	Pleiotropic regulator 1	PLRG1_MOUSE	-0.331917	0.314654	0.999974	4.7956e-06
Q6P1I6	Psd2	PH and SEC7 domain-containing protein 2	PSD2_MOUSE	-0.356072	0.314873	0.999974	8.38577e-06
Q9ERV1	Mkrn2	Probable E3 ubiquitin-protein ligase makorin-2	MKRN2_MOUSE	-0.153256	0.3149	0.999974	4.76513e-06
P60879	Snap25	Synaptosomal-associated protein 25	SNP25_MOUSE	-0.104414	0.315006	0.999974	0.00169382
P68040	Rack1	Receptor of activated protein C kinase 1	RACK1_MOUSE	-0.0934336	0.315026	0.999974	0.000158154
Q9QXY9	Pex3	Peroxisomal biogenesis factor 3	PEX3_MOUSE	0.113756	0.315471	0.999974	2.23895e-06
Q9CQ19	Myl9	Myosin regulatory light polypeptide 9	MYL9_MOUSE	0.0981153	0.315546	0.999974	0.000219885
Q8BRT1	Clasp2	CLIP-associating protein 2	CLAP2_MOUSE	-0.0756006	0.315591	0.999974	0.000117551
Q8C525	Mb21d2	Protein MB21D2	M21D2_MOUSE	-0.332035	0.315628	0.999974	4.01961e-05
P97434	Mprip	Myosin phosphatase Rho-interacting protein	MPRIP_MOUSE	-0.0944969	0.315779	0.999974	1.37477e-05
Q8BLS7	Sowaha	Ankyrin repeat domain-containing protein SOWAHA	SWAHA_MOUSE	-0.885553	0.315837	0.999974	5.47845e-06
P70124	Serpinb5	Serpin B5	SPB5_MOUSE	-2.11029	0.315979	0.999974	6.27277e-06
Q80YV4	Pank4	Pantothenate kinase 4	PANK4_MOUSE	-0.164919	0.31638	0.999974	2.78497e-05
Q9WV60	Gsk3b	Glycogen synthase kinase-3 beta	GSK3B_MOUSE	-0.128291	0.316773	0.999974	0.000168816
Q9JHQ5	Lztfl1	Leucine zipper transcription factor-like protein 1	LZTL1_MOUSE	-0.146916	0.317197	0.999974	3.08436e-05
P61979	Hnrnpk	Heterogeneous nuclear ribonucleoprotein K	HNRPK_MOUSE	-0.29337	0.317468	0.999974	0.000370329
Q60902	Eps15l1	Epidermal growth factor receptor substrate 15-like 1	EP15R_MOUSE	-0.375751	0.317759	0.999974	0.000167364
Q99PV8	Bcl11b	B-cell lymphoma/leukemia 11B	BC11B_MOUSE	-0.425166	0.318112	0.999974	1.80962e-05
Q61164	Ctcf	Transcriptional repressor CTCF	CTCF_MOUSE	-0.775877	0.318155	0.999974	7.23628e-06
Q9D2M8	Ube2v2	Ubiquitin-conjugating enzyme E2 variant 2	UB2V2_MOUSE	-0.0680693	0.318383	0.999974	8.66192e-05
Q9CXP8	Gng10	Guanine nucleotide-binding protein G(I)/G(S)/G(O) subunit gamma-10	GBG10_MOUSE	0.112627	0.318847	0.999974	8.39416e-05
O35454	Clcn6	Chloride transport protein 6	CLCN6_MOUSE	0.317899	0.319159	0.999974	1.53453e-05
Q9CR95	Necap1	Adaptin ear-binding coat-associated protein 1	NECP1_MOUSE	-0.20348	0.319668	0.999974	0.000534795
O35684	Serpini1	Neuroserpin	NEUS_MOUSE	-0.317929	0.319781	0.999974	9.92605e-06
Q3UDW8	Hgsnat	Heparan-alpha-glucosaminide N-acetyltransferase	HGNAT_MOUSE	-0.257508	0.319913	0.999974	5.61072e-06
P41105	Rpl28	60S ribosomal protein L28	RL28_MOUSE	0.414182	0.31996	0.999974	0.000105678
Q9QXP6	Mkrn1	E3 ubiquitin-protein ligase makorin-1	MKRN1_MOUSE	-0.212454	0.320172	0.999974	3.70242e-06
Q9D024	Ccdc47	Coiled-coil domain-containing protein 47	CCD47_MOUSE	0.147313	0.321343	0.999974	2.47073e-05
Q6P5E8	Dgkq	Diacylglycerol kinase theta	DGKQ_MOUSE	0.107685	0.321865	0.999974	2.14338e-05
O35393	Efnb3	Ephrin-B3	EFNB3_MOUSE	-0.351685	0.322155	0.999974	6.17371e-05
Q9QZN4	Fbxo6	F-box only protein 6	FBX6_MOUSE	0.142159	0.322255	0.999974	2.08143e-05
Q9EP53	Tsc1	Hamartin	TSC1_MOUSE	-0.116258	0.322559	0.999974	1.69281e-05
Q9EST5	Anp32b	Acidic leucine-rich nuclear phosphoprotein 32 family member B	AN32B_MOUSE	-0.326813	0.32256	0.999974	5.8728e-05
Q91WJ0	Frs3	Fibroblast growth factor receptor substrate 3	FRS3_MOUSE	-0.284811	0.32273	0.999974	3.91112e-06
Q9JI46	Nudt3	Diphosphoinositol polyphosphate phosphohydrolase 1	NUDT3_MOUSE	-0.0700161	0.322809	0.999974	0.000172447
Q99JB2	Stoml2	Stomatin-like protein 2, mitochondrial	STML2_MOUSE	0.171504	0.323076	0.999974	4.80869e-05
Q9D4C9	Clvs1	Clavesin-1	CLVS1_MOUSE	-0.128615	0.32329	0.999974	7.13046e-05
Q8K3X4	Irf2bpl	Probable E3 ubiquitin-protein ligase IRF2BPL	I2BPL_MOUSE	-0.442144	0.323344	0.999974	2.87138e-06
Q99M07	Coa5	Cytochrome c oxidase assembly factor 5	COA5_MOUSE	-0.210326	0.323359	0.999974	9.04455e-06
Q61735	Cd47	Leukocyte surface antigen CD47	CD47_MOUSE	0.275163	0.323473	0.999974	0.000529648
Q8BH86	Dglucy	D-glutamate cyclase, mitochondrial	GLUCM_MOUSE	0.121085	0.323805	0.999974	3.40172e-05
Q9D8P4	Mrpl17	39S ribosomal protein L17, mitochondrial	RM17_MOUSE	-0.132461	0.323968	0.999974	2.38063e-05
Q8CBE3	Wdr37	WD repeat-containing protein 37	WDR37_MOUSE	0.0385623	0.324061	0.999974	0.000171326
Q3V3V9	Carmil2	Capping protein, Arp2/3 and myosin-I linker protein 2	CARL2_MOUSE	-0.139305	0.324096	0.999974	6.35749e-05
P68373	Tuba1c	Tubulin alpha-1C chain	TBA1C_MOUSE	-0.584505	0.324366	0.999974	0.00495988
Q9D071	Mms19	MMS19 nucleotide excision repair protein homolog	MMS19_MOUSE	-0.0636553	0.324433	0.999974	1.33622e-05
O09172	Gclm	Glutamate--cysteine ligase regulatory subunit	GSH0_MOUSE	-0.102618	0.324443	0.999974	5.58155e-05
Q924D0	Rtn4ip1	Reticulon-4-interacting protein 1, mitochondrial	RT4I1_MOUSE	0.0680923	0.324679	0.999974	4.80973e-05
P04925	Prnp	Major prion protein	PRIO_MOUSE	0.193221	0.324966	0.999974	0.000481991
P63213	Gng2	Guanine nucleotide-binding protein G(I)/G(S)/G(O) subunit gamma-2	GBG2_MOUSE	0.110092	0.325009	0.999974	0.000745091
Q3UHB1	Nt5dc3	5'-nucleotidase domain-containing protein 3	NT5D3_MOUSE	0.0624449	0.325058	0.999974	7.73814e-05
Q00493	Cpe	Carboxypeptidase E	CBPE_MOUSE	-0.114686	0.325491	0.999974	0.000201532
Q921T2	Tor1aip1	Torsin-1A-interacting protein 1	TOIP1_MOUSE	-0.294176	0.325496	0.999974	1.09519e-05
Q8VE62	Paip1	Polyadenylate-binding protein-interacting protein 1	PAIP1_MOUSE	-0.0637772	0.325589	0.999974	9.78745e-05
Q9JJN6	Ctnnbip1	Beta-catenin-interacting protein 1	CNBP1_MOUSE	-0.221217	0.325675	0.999974	1.22527e-05
Q9DC16	Ergic1	Endoplasmic reticulum-Golgi intermediate compartment protein 1	ERGI1_MOUSE	0.191831	0.325715	0.999974	5.15687e-05
O35071	Kif1c	Kinesin-like protein KIF1C	KIF1C_MOUSE	-0.159963	0.326122	0.999974	1.74823e-05
Q8BMQ8	Mon1b	Vacuolar fusion protein MON1 homolog B	MON1B_MOUSE	-0.12081	0.326516	0.999974	2.34702e-06
Q03517	Scg2	Secretogranin-2	SCG2_MOUSE	-0.200568	0.326652	0.999974	0.000517798
Q9ERF3	Wdr61	WD repeat-containing protein 61	WDR61_MOUSE	-0.179079	0.32676	0.999974	1.2669e-05
Q9DCS9	Ndufb10	NADH dehydrogenase [ubiquinone] 1 beta subcomplex subunit 10	NDUBA_MOUSE	0.0699696	0.326888	0.999974	0.000934141
P99027	Rplp2	60S acidic ribosomal protein P2	RLA2_MOUSE	-0.044248	0.327061	0.999974	0.000468545
Q9WTP7	Ak3	GTP:AMP phosphotransferase AK3, mitochondrial	KAD3_MOUSE	0.134466	0.327747	0.999974	0.000184381
Q9D7G0	Prps1	Ribose-phosphate pyrophosphokinase 1	PRPS1_MOUSE	0.232413	0.328168	0.999974	0.000142885
P34884	Mif	Macrophage migration inhibitory factor	MIF_MOUSE	0.0968717	0.328315	0.999974	0.00144745
Q5SP85	Ccdc85a	Coiled-coil domain-containing protein 85A	CC85A_MOUSE	-0.11431	0.328599	0.999974	8.95453e-06
Q9CXF4	Tbc1d15	TBC1 domain family member 15	TBC15_MOUSE	-0.0675683	0.328763	0.999974	1.24696e-05
P54728	Rad23b	UV excision repair protein RAD23 homolog B	RD23B_MOUSE	-0.101121	0.328929	0.999974	0.000162346
P09671	Sod2	Superoxide dismutase [Mn], mitochondrial	SODM_MOUSE	0.151975	0.328985	0.999974	0.000787548
O70139	Pkig	cAMP-dependent protein kinase inhibitor gamma	IPKG_MOUSE	-0.34505	0.329133	0.999974	1.52964e-05
Q8BGC0	Htatsf1	HIV Tat-specific factor 1 homolog	HTSF1_MOUSE	-0.263489	0.329283	0.999974	8.75198e-06
Q8BSF4	Pisd	Phosphatidylserine decarboxylase proenzyme, mitochondrial	PISD_MOUSE	0.194515	0.330349	0.999974	5.10424e-06
Q9ER97	Ngb	Neuroglobin	NGB_MOUSE	0.285698	0.330561	0.999974	9.17564e-06
Q9CX56	Psmd8	26S proteasome non-ATPase regulatory subunit 8	PSMD8_MOUSE	-0.131265	0.331082	0.999974	8.43754e-05
Q9CQV8	Ywhab	14-3-3 protein beta/alpha	1433B_MOUSE	-0.259611	0.331298	0.999974	0.00581342
P70671	Irf3	Interferon regulatory factor 3	IRF3_MOUSE	-0.244251	0.331451	0.999974	7.5177e-06
Q6ZWY3	Rps27l	40S ribosomal protein S27-like	RS27L_MOUSE	0.16529	0.331612	0.999974	0.00011667
O88796	Rpp30	Ribonuclease P protein subunit p30	RPP30_MOUSE	-0.17472	0.332341	0.999974	3.72926e-06
Q8VI75	Ipo4	Importin-4	IPO4_MOUSE	-0.0824112	0.332589	0.999974	2.87008e-05
Q9DCZ1	Gmpr	GMP reductase 1	GMPR1_MOUSE	-0.129294	0.332619	0.999974	7.35397e-05
O54734	Ddost	Dolichyl-diphosphooligosaccharide--protein glycosyltransferase 48 kDa subunit	OST48_MOUSE	0.0577734	0.332692	0.999974	8.06536e-05
Q9D1P4	Chordc1	Cysteine and histidine-rich domain-containing protein 1	CHRD1_MOUSE	-0.125654	0.332956	0.999974	8.42232e-05
Q8BGS2	Bola2	BolA-like protein 2	BOLA2_MOUSE	-0.0830444	0.333105	0.999974	0.000103431
O54834	Arhgap6	Rho GTPase-activating protein 6	RHG06_MOUSE	-0.147687	0.333387	0.999974	1.3807e-05
Q8R010	Aimp2	Aminoacyl tRNA synthase complex-interacting multifunctional protein 2	AIMP2_MOUSE	-0.113207	0.333672	0.999974	3.32563e-05
P20029	Hspa5	Endoplasmic reticulum chaperone BiP	BIP_MOUSE	0.0728625	0.334509	0.999974	0.000487136
Q03265	Atp5f1a	ATP synthase subunit alpha, mitochondrial	ATPA_MOUSE	0.0642151	0.334734	0.999974	0.00499611
Q8BSK8	Rps6kb1	Ribosomal protein S6 kinase beta-1	KS6B1_MOUSE	-0.19614	0.334839	0.999974	2.54813e-06
P53026	Rpl10a	60S ribosomal protein L10a	RL10A_MOUSE	0.153828	0.335015	0.999974	0.000174264
Q9R0N7,Q62747	Syt7	Synaptotagmin-7	SYT7_MOUSE,SYT7_RAT	0.147142	0.335475	0.999974	0.000110066
Q80X73	Pelo	Protein pelota homolog	PELO_MOUSE	-0.149723	0.335512	0.999974	6.20951e-06
Q80X95	Rraga	Ras-related GTP-binding protein A	RRAGA_MOUSE	-0.113534	0.335869	0.999974	4.80978e-05
Q505D1	Ankrd28	Serine/threonine-protein phosphatase 6 regulatory ankyrin repeat subunit A	ANR28_MOUSE	-0.165398	0.336115	0.999974	1.05943e-05
Q5SWP3	Nacad	NAC-alpha domain-containing protein 1	NACAD_MOUSE	-0.467347	0.336147	0.999974	8.58469e-06
O08672	Kifc2	Kinesin-like protein KIFC2	KIFC2_MOUSE	-0.315134	0.336219	0.999974	1.79419e-06
P26049	Gabra3	Gamma-aminobutyric acid receptor subunit alpha-3	GBRA3_MOUSE	-0.349099	0.336442	0.999974	7.16469e-06
Q8VDH1	Fbxo21	F-box only protein 21	FBX21_MOUSE	-0.115257	0.337589	0.999974	7.72516e-06
Q9CQY1	Atg12	Ubiquitin-like protein ATG12	ATG12_MOUSE	-0.166975	0.337846	0.999974	9.84585e-06
Q8BTY2	Slc4a7	Sodium bicarbonate cotransporter 3	S4A7_MOUSE	-0.28567	0.337963	0.999974	3.20055e-06
P0C027;P0C028	Nudt10;Nudt11	Diphosphoinositol polyphosphate phosphohydrolase 3-alpha;Diphosphoinositol polyphosphate phosphohydrolase 3-beta	NUD10_MOUSE;NUD11_MOUSE	-0.0560432	0.338082	0.999974	0.000114338
Q02956	Prkcz	Protein kinase C zeta type	KPCZ_MOUSE	-0.281725	0.338141	0.999974	5.01875e-06
P09542	Myl3	Myosin light chain 3	MYL3_MOUSE	-0.513708	0.338448	0.999974	3.65568e-06
Q99J56	Derl1	Derlin-1	DERL1_MOUSE	0.165485	0.33853	0.999974	1.73916e-05
P28658	Atxn10	Ataxin-10	ATX10_MOUSE	-0.304143	0.338941	0.999974	8.20178e-05
Q6I6G8	Hecw2	E3 ubiquitin-protein ligase HECW2	HECW2_MOUSE	-0.148008	0.339306	0.999974	1.71427e-05
Q9D7A6	Srp19	Signal recognition particle 19 kDa protein	SRP19_MOUSE	-0.122203	0.339337	0.999974	6.0849e-06
Q5RJI5	Brsk1	Serine/threonine-protein kinase BRSK1	BRSK1_MOUSE	-0.175065	0.339935	0.999974	6.52336e-05
Q9WV34	Mpp2	MAGUK p55 subfamily member 2	MPP2_MOUSE	-0.208584	0.339963	0.999974	0.000158946
Q8C5L3;Q9NZN8	Cnot2;CNOT2	CCR4-NOT transcription complex subunit 2	CNOT2_MOUSE;CNOT2_HUMAN	-0.244737	0.339966	0.999974	6.73765e-06
P56371	Rab4a	Ras-related protein Rab-4A	RAB4A_MOUSE	-0.0490192	0.340083	0.999974	4.88378e-05
Q8VE22	Mrps23	28S ribosomal protein S23, mitochondrial	RT23_MOUSE	-0.0883601	0.340195	0.999974	1.87237e-05
P97950	Rab33a	Ras-related protein Rab-33A	RB33A_MOUSE	-0.21974	0.340317	0.999974	2.0635e-05
Q8VI36	Pxn	Paxillin	PAXI_MOUSE	-0.233269	0.3404	0.999974	3.14232e-06
P58802	Tbc1d10a	TBC1 domain family member 10A	TB10A_MOUSE	-0.10068	0.340438	0.999974	8.81541e-06
Q8K358	Pigu	Phosphatidylinositol glycan anchor biosynthesis class U protein	PIGU_MOUSE	-0.573045	0.341248	0.999974	7.52535e-06
P61961	Ufm1	Ubiquitin-fold modifier 1	UFM1_MOUSE	-0.103397	0.341577	0.999974	0.000158752
Q99L88	Sntb1	Beta-1-syntrophin	SNTB1_MOUSE	-0.142297	0.341792	0.999974	1.1606e-05
Q9Z307	Kcnj16	Inward rectifier potassium channel 16	KCJ16_MOUSE	-1.03828	0.341812	0.999974	1.01874e-05
P61982	Ywhag	14-3-3 protein gamma	1433G_MOUSE	-0.205697	0.341845	0.999974	0.00123047
Q9D8S4	Rexo2	Oligoribonuclease, mitochondrial	ORN_MOUSE	0.0608322	0.341857	0.999974	8.28059e-05
Q61490	Alcam	CD166 antigen	CD166_MOUSE	0.255626	0.341867	0.999974	0.000373301
Q5SYH2	Tmem199	Transmembrane protein 199	TM199_MOUSE	-0.450913	0.342242	0.999974	0.0001093
Q8VIJ6	Sfpq	Splicing factor, proline- and glutamine-rich	SFPQ_MOUSE	-0.301655	0.342281	0.999974	0.000237117
E9PZ19	Igsf9b	Protein turtle homolog B	TUTLB_MOUSE	0.0799269	0.342356	0.999974	1.61366e-05
Q8VE96	Slc35f6	Solute carrier family 35 member F6	S35F6_MOUSE	0.241291	0.342473	0.999974	4.9375e-06
Q80WC7	Agfg2	Arf-GAP domain and FG repeat-containing protein 2	AGFG2_MOUSE	-0.20257	0.342936	0.999974	3.32692e-05
O35435	Dhodh	Dihydroorotate dehydrogenase (quinone), mitochondrial	PYRD_MOUSE	0.146714	0.343396	0.999974	2.83305e-05
Q9CPZ8	Cmc1	COX assembly mitochondrial protein homolog	COXM1_MOUSE	0.0754967	0.343777	0.999974	2.98989e-05
Q8K0G5	Eipr1	EARP and GARP complex-interacting protein 1	EIPR1_MOUSE	-0.0835924	0.344009	0.999974	4.81814e-05
Q8R550	Sh3kbp1	SH3 domain-containing kinase-binding protein 1	SH3K1_MOUSE	-0.169284	0.344107	0.999974	3.9539e-05
Q6RI63	Fam120b	Constitutive coactivator of peroxisome proliferator-activated receptor gamma	F120B_MOUSE	-0.115314	0.344228	0.999974	4.889e-06
Q8K097	Faim2	Protein lifeguard 2	LFG2_MOUSE	0.0685918	0.344751	0.999974	0.000132235
Q6GQU6	Lingo3	Leucine-rich repeat and immunoglobulin-like domain-containing nogo receptor-interacting protein 3	LIGO3_MOUSE	-0.170901	0.34502	0.999974	1.15003e-05
Q6PD10	Ip6k1	Inositol hexakisphosphate kinase 1	IP6K1_MOUSE	-0.193378	0.345172	0.999974	7.16754e-06
Q61327	Slc6a3	Sodium-dependent dopamine transporter	SC6A3_MOUSE	-0.103161	0.34531	0.999974	0.000314869
O08915	Aip	AH receptor-interacting protein	AIP_MOUSE	-0.0973926	0.345486	0.999974	5.89736e-05
Q8K0D0	Cdk17	Cyclin-dependent kinase 17	CDK17_MOUSE	0.231274	0.345679	0.999974	1.58392e-05
Q9QXZ0	Macf1	Microtubule-actin cross-linking factor 1	MACF1_MOUSE	-0.29247	0.345893	0.999974	0.000135737
Q8R1K1	Ubac2	Ubiquitin-associated domain-containing protein 2	UBAC2_MOUSE	-0.542561	0.346083	0.999974	4.82722e-06
Q7TPB0	Plppr3	Phospholipid phosphatase-related protein type 3	PLPR3_MOUSE	-0.0901632	0.346184	0.999974	7.37888e-05
Q9D1H8	Mrpl53	39S ribosomal protein L53, mitochondrial	RM53_MOUSE	0.0835519	0.346511	0.999974	1.11636e-05
P59672	Anks1a	Ankyrin repeat and SAM domain-containing protein 1A	ANS1A_MOUSE	0.295891	0.34664	0.999974	0.000185046
Q8VEK0	Tmem30a	Cell cycle control protein 50A	CC50A_MOUSE	0.132154	0.347469	0.999974	0.000235249
Q0KK59	Unc79	Protein unc-79 homolog	UNC79_MOUSE	-0.146527	0.347529	0.999974	7.43932e-05
P70663	Sparcl1	SPARC-like protein 1	SPRL1_MOUSE	-0.651699	0.348205	0.999974	5.81381e-05
Q6P9Q6	Fkbp15	FK506-binding protein 15	FKB15_MOUSE	-0.278338	0.348281	0.999974	1.63258e-05
P27048;P63163	Snrpb;Snrpn	Small nuclear ribonucleoprotein-associated protein B;Small nuclear ribonucleoprotein-associated protein N	RSMB_MOUSE;RSMN_MOUSE	-0.2652	0.348478	0.999974	2.95476e-05
Q9CZN7	Shmt2	Serine hydroxymethyltransferase, mitochondrial	GLYM_MOUSE	0.140768	0.348626	0.999974	3.2813e-05
O08842	Gfra2	GDNF family receptor alpha-2	GFRA2_MOUSE	-0.353267	0.348643	0.999974	4.81982e-05
Q9CX13	Cnih4	Protein cornichon homolog 4	CNIH4_MOUSE	0.0817308	0.34892	0.999974	2.39568e-05
Q9WUH4,P97447	Fhl1	Four and a half LIM domains protein 1	FHL1_RAT,FHL1_MOUSE	0.0832741	0.348963	0.999974	5.37578e-05
Q8BHJ6	Serinc5	Serine incorporator 5	SERC5_MOUSE	0.420498	0.34903	0.999974	9.46957e-06
Q99PG2	Ogfr	Opioid growth factor receptor	OGFR_MOUSE	-0.247868	0.349172	0.999974	6.94572e-05
Q8BFR6	Zfand1	AN1-type zinc finger protein 1	ZFAN1_MOUSE	0.208272	0.349293	0.999974	5.11064e-06
Q8C4X2	Csnk1g3	Casein kinase I isoform gamma-3	KC1G3_MOUSE	0.11798	0.349535	0.999974	3.06369e-05
P62077	Timm8b	Mitochondrial import inner membrane translocase subunit Tim8 B	TIM8B_MOUSE	0.078467	0.349542	0.999974	7.14913e-05
Q3UHJ0	Aak1	AP2-associated protein kinase 1	AAK1_MOUSE	-0.191011	0.349597	0.999974	0.000211356
Q8R404	Micos13	MICOS complex subunit MIC13	MIC13_MOUSE	0.183076	0.349755	0.999974	9.7187e-05
Q9CQN1	Trap1	Heat shock protein 75 kDa, mitochondrial	TRAP1_MOUSE	0.0408664	0.350007	0.999974	9.39631e-05
Q80TK0	Kiaa1107	AP2-interacting clathrin-endocytosis protein	K1107_MOUSE	-0.30503	0.350025	0.999974	2.54284e-05
Q6PAV2	Herc4	Probable E3 ubiquitin-protein ligase HERC4	HERC4_MOUSE	-0.203787	0.350158	0.999974	2.64988e-05
Q9WUP7	Uchl5	Ubiquitin carboxyl-terminal hydrolase isozyme L5	UCHL5_MOUSE	-0.167495	0.350176	0.999974	3.79677e-05
O55135	Eif6	Eukaryotic translation initiation factor 6	IF6_MOUSE	-0.310045	0.350468	0.999974	5.03404e-06
Q60872	Eif1a	Eukaryotic translation initiation factor 1A	IF1A_MOUSE	-0.147168	0.35054	0.999974	4.37424e-05
Q61234	Snta1	Alpha-1-syntrophin	SNTA1_MOUSE	-0.133493	0.351078	0.999974	6.70166e-05
Q9D0Q7	Mrpl45	39S ribosomal protein L45, mitochondrial	RM45_MOUSE	0.0835927	0.351158	0.999974	2.52547e-05
Q8K2C9	Hacd3	Very-long-chain (3R)-3-hydroxyacyl-CoA dehydratase 3	HACD3_MOUSE	0.0732418	0.351645	0.999974	0.00023757
P27773	Pdia3	Protein disulfide-isomerase A3	PDIA3_MOUSE	0.0946306	0.351683	0.999974	0.000594418
Q99LI2	Clcc1	Chloride channel CLIC-like protein 1	CLCC1_MOUSE	-0.154666	0.351739	0.999974	6.41824e-06
Q0KL01	Ubxn2b	UBX domain-containing protein 2B	UBX2B_MOUSE	-0.163422	0.351801	0.999974	1.90511e-05
Q8VD62	Bles03	UPF0696 protein C11orf68 homolog	CK068_MOUSE	-0.0851472	0.352215	0.999974	4.44308e-05
P54726	Rad23a	UV excision repair protein RAD23 homolog A	RD23A_MOUSE	0.153717	0.352607	0.999974	0.000143643
Q69ZS8	Kazn	Kazrin	KAZRN_MOUSE	-0.167281	0.352654	0.999974	2.28384e-05
Q80XC2	Trmt61a	tRNA (adenine(58)-N(1))-methyltransferase catalytic subunit TRMT61A	TRM61_MOUSE	-0.392239	0.352735	0.999974	6.94933e-06
Q3TDD9	Ppp1r21	Protein phosphatase 1 regulatory subunit 21	PPR21_MOUSE	-0.176407	0.352736	0.999974	3.03225e-05
P55288	Cdh11	Cadherin-11	CAD11_MOUSE	0.250858	0.353154	0.999974	1.68147e-05
A2A8U2	Tmem201	Transmembrane protein 201	TM201_MOUSE	0.118551	0.353192	0.999974	7.30872e-06
P09602	Hmgn2	Non-histone chromosomal protein HMG-17	HMGN2_MOUSE	-0.125378	0.353269	0.999974	4.3504e-05
P26231	Ctnna1	Catenin alpha-1	CTNA1_MOUSE	0.221139	0.353315	0.999974	0.000185341
Q8BGU5	Ccny	Cyclin-Y	CCNY_MOUSE	-0.196615	0.353697	0.999974	5.47877e-05
Q9D1M0	Sec13	Protein SEC13 homolog	SEC13_MOUSE	-0.0888456	0.353839	0.999974	6.21071e-05
Q3UFS0	Zyg11b	Protein zyg-11 homolog B	ZY11B_MOUSE	-0.0548183	0.353904	0.999974	8.10482e-06
Q8BT51	COA4	Cytochrome c oxidase assembly factor 4 homolog, mitochondrial	COA4_MOUSE	0.182146	0.354406	0.999974	3.13306e-06
Q9JKB1	Uchl3	Ubiquitin carboxyl-terminal hydrolase isozyme L3	UCHL3_MOUSE	-0.0635738	0.354409	0.999974	0.00017906
Q9QX11	Cyth1	Cytohesin-1	CYH1_MOUSE	-0.179328	0.354606	0.999974	8.90878e-06
Q9CYZ2	Tpd52l2	Tumor protein D54	TPD54_MOUSE	-0.124785	0.355096	0.999974	0.000176087
Q9CXI5	Manf	Mesencephalic astrocyte-derived neurotrophic factor	MANF_MOUSE	0.0663082	0.35584	0.999974	8.25101e-05
Q8K2M0	Mrpl38	39S ribosomal protein L38, mitochondrial	RM38_MOUSE	0.129998	0.355873	0.999974	1.52997e-05
Q8CCN5	Bcas3	Breast carcinoma-amplified sequence 3 homolog	BCAS3_MOUSE	0.0749185	0.356116	0.999974	5.30447e-05
Q80XN0	Bdh1	D-beta-hydroxybutyrate dehydrogenase, mitochondrial	BDH_MOUSE	0.0814558	0.35619	0.999974	0.000452067
O08663	Metap2	Methionine aminopeptidase 2	MAP2_MOUSE	-0.202447	0.356585	0.999974	4.85231e-05
P10107	Anxa1	Annexin A1	ANXA1_MOUSE	-0.572874	0.356872	0.999974	2.02947e-06
Q6P6M7	Sepsecs	O-phosphoseryl-tRNA(Sec) selenium transferase	SPCS_MOUSE	0.128092	0.35712	0.999974	0.000512671
Q9ERN0	Scamp2	Secretory carrier-associated membrane protein 2	SCAM2_MOUSE	-0.15431	0.357315	0.999974	4.56373e-06
Q69ZH9	Arhgap23	Rho GTPase-activating protein 23	RHG23_MOUSE	0.0847727	0.357404	0.999974	2.08643e-05
Q6DFV3	Arhgap21	Rho GTPase-activating protein 21	RHG21_MOUSE	-0.0609444	0.357755	0.999974	3.10508e-05
Q8BH82	Napepld	N-acyl-phosphatidylethanolamine-hydrolyzing phospholipase D	NAPEP_MOUSE	0.269171	0.357778	0.999974	3.8075e-06
P08553	Nefm	Neurofilament medium polypeptide	NFM_MOUSE	0.572234	0.357838	0.999974	0.00294674
Q8BP00	Iqcb1	IQ calmodulin-binding motif-containing protein 1	IQCB1_MOUSE	0.114729	0.358008	0.999974	8.3941e-06
Q03173	Enah	Protein enabled homolog	ENAH_MOUSE	-0.228575	0.358015	0.999974	4.50763e-05
P22723	Gabrg2	Gamma-aminobutyric acid receptor subunit gamma-2	GBRG2_MOUSE	0.34093	0.358039	0.999974	3.97164e-05
Q6PAR5	Gapvd1	GTPase-activating protein and VPS9 domain-containing protein 1	GAPD1_MOUSE	-0.0637937	0.358443	0.999974	3.31948e-05
Q8BGP6	Slc25a40	Solute carrier family 25 member 40	S2540_MOUSE	0.118099	0.358661	0.999974	1.16287e-05
Q91VA6	Poldip2	Polymerase delta-interacting protein 2	PDIP2_MOUSE	-0.337575	0.35881	0.999974	1.49773e-05
Q8BMF3	Me3	NADP-dependent malic enzyme, mitochondrial	MAON_MOUSE	0.449106	0.359065	0.999974	0.000206588
Q5M956;Q3URF8	Kctd1;Kctd21	BTB/POZ domain-containing protein KCTD1;BTB/POZ domain-containing protein KCTD21	KCTD1_MOUSE;KCD21_MOUSE	-0.192711	0.359178	0.999974	1.18362e-05
P70213	Fv1	Friend virus susceptibility protein 1	FV1_MOUSE	0.995634	0.35921	0.999974	2.53783e-06
A2AIL4	Ndufaf6	NADH dehydrogenase (ubiquinone) complex I, assembly factor 6	NDUF6_MOUSE	0.222169	0.359383	0.999974	9.84944e-06
Q66JZ4	TCAIM	T-cell activation inhibitor, mitochondrial	TCAIM_MOUSE	0.388297	0.359847	0.999974	2.84323e-06
Q9DB77	Uqcrc2	Cytochrome b-c1 complex subunit 2, mitochondrial	QCR2_MOUSE	0.108415	0.359895	0.999974	0.000702619
Q9JK53	Prelp	Prolargin	PRELP_MOUSE	0.260868	0.359961	0.999974	1.7034e-05
P70451	Fer	Tyrosine-protein kinase Fer	FER_MOUSE	0.186088	0.360264	0.999974	1.83198e-06
Q6PB66	Lrpprc	Leucine-rich PPR motif-containing protein, mitochondrial	LPPRC_MOUSE	0.111095	0.360444	0.999974	0.000129611
Q8K0V4	Cnot3	CCR4-NOT transcription complex subunit 3	CNOT3_MOUSE	-0.249997	0.360511	0.999974	6.63174e-06
P39054	Dnm2	Dynamin-2	DYN2_MOUSE	0.267852	0.360682	0.999974	3.46078e-05
P56873	Znrd2	Protein ZNRD2	ZNRD2_MOUSE	-0.122802	0.360779	0.999974	2.52554e-05
Q9D773	Mrpl2	39S ribosomal protein L2, mitochondrial	RM02_MOUSE	0.281844	0.360823	0.999974	3.87184e-06
Q8R1Z9	Rnf121	RING finger protein 121	RN121_MOUSE	-0.242888	0.360911	0.999974	6.24601e-06
O88746	Tom1	Target of Myb protein 1	TOM1_MOUSE	-0.0784337	0.361213	0.999974	5.48673e-05
P48193	Epb41	Protein 4.1	41_MOUSE	-0.209103	0.361287	0.999974	1.90353e-05
Q80YA3	Ddhd1	Phospholipase DDHD1	DDHD1_MOUSE	-0.142278	0.361431	0.999974	1.50576e-05
P61166	Tmem258	Transmembrane protein 258	TM258_MOUSE	0.149372	0.361668	0.999974	9.98475e-06
Q60823	Akt2	RAC-beta serine/threonine-protein kinase	AKT2_MOUSE	0.252913	0.362026	0.999974	7.2975e-06
Q3TKY6	Cwc27	Spliceosome-associated protein CWC27 homolog	CWC27_MOUSE	-0.225997	0.36207	0.999974	4.21321e-06
Q9EQI8	Mrpl46	39S ribosomal protein L46, mitochondrial	RM46_MOUSE	0.0526929	0.362098	0.999974	2.12999e-05
O70166	Stmn3	Stathmin-3	STMN3_MOUSE	-0.0772505	0.362784	0.999974	3.66919e-05
P42932	Cct8	T-complex protein 1 subunit theta	TCPQ_MOUSE	-0.0836128	0.36297	0.999974	0.00038711
P0C0S8;Q8R1M2;Q93077;Q96KK5;Q99878;Q6GSS7;Q6FI13;Q64523;Q16777	H2AC11;H2afj;HIST1H2AC;HIST1H2AH;HIST1H2AJ;Hist2h2aa1;HIST2H2AA3;Hist2h2ac;HIST2H2AC	Histone H2A type 1;Histone H2A.J;Histone H2A type 1-C;Histone H2A type 1-H;Histone H2A type 1-J;Histone H2A type 2-A;Histone H2A type 2-A;Histone H2A type 2-C;Histone H2A type 2-C	H2A1_HUMAN;H2AJ_MOUSE;H2A1C_HUMAN;H2A1H_HUMAN;H2A1J_HUMAN;H2A2A_MOUSE;H2A2A_HUMAN;H2A2C_MOUSE;H2A2C_HUMAN	0.194515	0.363142	0.999974	0.000407776
Q9EQZ7	Rims2	Regulating synaptic membrane exocytosis protein 2	RIMS2_MOUSE	-0.085895	0.363164	0.999974	2.32431e-05
Q5SUE8	Ankrd40	Ankyrin repeat domain-containing protein 40	ANR40_MOUSE	-0.104382	0.363502	0.999974	3.2213e-06
O70274	Ptp4a2	Protein tyrosine phosphatase type IVA 2	TP4A2_MOUSE	-0.0377689	0.363617	0.999974	3.81464e-05
Q3TIX9	Usp39	U4/U6.U5 tri-snRNP-associated protein 2	SNUT2_MOUSE	-0.203594	0.363844	0.999974	6.34742e-06
Q3TEA8	Hp1bp3	Heterochromatin protein 1-binding protein 3	HP1B3_MOUSE	-0.535797	0.363861	0.999974	0.000157609
Q9Z172	Sumo3	Small ubiquitin-related modifier 3	SUMO3_MOUSE	-0.209289	0.36391	0.999974	0.000214934
P62320	Snrpd3	Small nuclear ribonucleoprotein Sm D3	SMD3_MOUSE	-0.215898	0.363978	0.999974	6.15437e-05
Q60829	Ppp1r1b	Protein phosphatase 1 regulatory subunit 1B	PPR1B_MOUSE	-0.340017	0.364928	0.999974	0.000947718
Q7TNM2	Trim46	Tripartite motif-containing protein 46	TRI46_MOUSE	0.875262	0.364978	0.999974	3.17971e-05
Q9R0Q7	Ptges3	Prostaglandin E synthase 3	TEBP_MOUSE	-0.0571881	0.365122	0.999974	0.000328967
Q922H2	Pdk3	[Pyruvate dehydrogenase (acetyl-transferring)] kinase isozyme 3, mitochondrial	PDK3_MOUSE	0.069289	0.365252	0.999974	7.91026e-05
Q9DBR1	Xrn2	5'-3' exoribonuclease 2	XRN2_MOUSE	-0.443089	0.365723	0.999974	1.17243e-05
[truncated: 3,860 more rows]
