# Supplementary material for: Subcellular proteomics of dopamine neurons in the mouse brain
Source: eLife. 2022 Jan 31;11:e70921. doi: 10.7554/eLife.70921 (PMC8860448; doi:10.7554/eLife.70921)
Supplement: Figure 2—source data 4. — (1) Ventral midbrain (VM) streptavidin IP: APEX2+ vs. APEX2− (control). (2) Medial forebrain bundle (MFB) streptavidin IP: APEX2+ vs. APEX2− (control). (3) Striatum streptavidin IP: APEX2+ vs. APEX2− (control). [file elife-70921-fig2-data4.xlsx]

## Sheet: Ctrl_v_APEX_VM
ProteinAccessions	Genes	ProteinDescriptions	ProteinNames	Log2FC	pvalue	qvalue	Expr
Q9JI90	Rnf14	E3 ubiquitin-protein ligase RNF14	RNF14_MOUSE	inf	3.8262e-08	4.60564e-05	8.85688e-05
P62881-2	Gnb5	Isoform 2 of Guanine nucleotide-binding protein subunit beta-5	GNB5_MOUSE	inf	4.30667e-08	4.60564e-05	2.11429e-05
Q8R570	Snap47	Synaptosomal-associated protein 47	SNP47_MOUSE	inf	6.64306e-08	4.60564e-05	7.04263e-05
O35465;O35465-2	Fkbp8	Peptidyl-prolyl cis-trans isomerase FKBP8;Isoform 2 of Peptidyl-prolyl cis-trans isomerase FKBP8	FKBP8_MOUSE	inf	8.33394e-08	4.60564e-05	6.1557e-05
Q91V09	Wdr13	WD repeat-containing protein 13	WDR13_MOUSE	inf	8.3739e-08	4.60564e-05	2.33096e-05
P62069;Q9D9M2;Q9D9M2-2	Usp46;Usp12;Usp12	Ubiquitin carboxyl-terminal hydrolase 46;Ubiquitin carboxyl-terminal hydrolase 12;Isoform 2 of Ubiquitin carboxyl-terminal hydrolase 12	UBP46_MOUSE;UBP12_MOUSE;UBP12_MOUSE	inf	1.82611e-07	8.36969e-05	2.92101e-05
Q03141;Q03141-2;Q03141-3	Mark3	MAP/microtubule affinity-regulating kinase 3;Isoform 2 of MAP/microtubule affinity-regulating kinase 3;Isoform 3 of MAP/microtubule affinity-regulating kinase 3	MARK3_MOUSE	inf	2.31483e-07	8.68204e-05	3.13234e-05
Q80WC7;Q80WC7-2	Agfg2	Arf-GAP domain and FG repeat-containing protein 2;Isoform 2 of Arf-GAP domain and FG repeat-containing protein 2	AGFG2_MOUSE	inf	2.55877e-07	8.68204e-05	2.94839e-05
Q8K0S0	Phyhip	Phytanoyl-CoA hydroxylase-interacting protein	PHYIP_MOUSE	inf	2.84139e-07	8.68204e-05	3.25146e-05
Q3UYG8	Macrod2	ADP-ribose glycohydrolase MACROD2	MACD2_MOUSE	inf	3.61518e-07	9.5355e-05	9.92875e-06
Q9CR00	Psmd9	26S proteasome non-ATPase regulatory subunit 9	PSMD9_MOUSE	inf	4.42023e-07	9.5355e-05	1.42112e-05
O54931;O54931-4	Akap2	A-kinase anchor protein 2;Isoform 4 of A-kinase anchor protein 2	AKAP2_MOUSE	inf	4.52883e-07	9.5355e-05	5.72571e-05
Q9DBR7;Q9DBR7-2	Ppp1r12a	Protein phosphatase 1 regulatory subunit 12A;Isoform 2 of Protein phosphatase 1 regulatory subunit 12A	MYPT1_MOUSE	inf	4.70643e-07	9.5355e-05	3.00824e-05
Q6PA06	Atl2	Atlastin-2	ATLA2_MOUSE	inf	5.14786e-07	9.5355e-05	4.99396e-05
P63046	Sult4a1	Sulfotransferase 4A1	ST4A1_MOUSE	inf	5.42392e-07	9.5355e-05	4.98167e-05
O35250;O35250-2	Exoc7	Exocyst complex component 7;Isoform 2 of Exocyst complex component 7	EXOC7_MOUSE	inf	5.67008e-07	9.5355e-05	2.33012e-05
P54923	Adprh	[Protein ADP-ribosylarginine] hydrolase	ADPRH_MOUSE	inf	5.94441e-07	9.5355e-05	2.14731e-05
Q8BGQ1	Vipas39	Spermatogenesis-defective protein 39 homolog	SPE39_MOUSE	inf	6.24756e-07	9.5355e-05	2.23423e-05
P70425	Rit2	GTP-binding protein Rit2	RIT2_MOUSE	inf	6.93218e-07	9.5355e-05	3.23547e-05
P62137	Ppp1ca	Serine/threonine-protein phosphatase PP1-alpha catalytic subunit	PP1A_MOUSE	inf	6.96269e-07	9.5355e-05	4.5382e-05
O88533	Ddc	Aromatic-L-amino-acid decarboxylase	DDC_MOUSE	inf	7.28165e-07	9.5355e-05	0.000362125
Q8C1A5	Thop1	Thimet oligopeptidase	THOP1_MOUSE	inf	7.9709e-07	9.96363e-05	1.16125e-05
A2AJI0	Map7d1	MAP7 domain-containing protein 1	MA7D1_MOUSE	inf	8.77092e-07	0.00010487	6.03295e-05
Q61598	Gdi2	Rab GDP dissociation inhibitor beta	GDIB_MOUSE	3.01517	9.87796e-07	0.000113185	0.000309741
Q8CI71	Vps50	Syndetin	VPS50_MOUSE	inf	1.07087e-06	0.000117796	1.84506e-05
Q6PIP5	Nudcd1	NudC domain-containing protein 1	NUDC1_MOUSE	inf	1.15464e-06	0.000119462	3.69607e-05
Q3UTH8;Q3UTH8-2;Q3UTH8-3;Q3UTH8-4	Arhgef9	Rho guanine nucleotide exchange factor 9;Isoform 2 of Rho guanine nucleotide exchange factor 9;Isoform 3 of Rho guanine nucleotide exchange factor 9;Isoform 4 of Rho guanine nucleotide exchange factor 9	ARHG9_MOUSE	inf	1.23642e-06	0.000119462	6.42072e-05
Q5PR73	Diras2	GTP-binding protein Di-Ras2	DIRA2_MOUSE	inf	1.25837e-06	0.000119462	2.30312e-05
Q9R1R2	Trim3	Tripartite motif-containing protein 3	TRIM3_MOUSE	inf	1.25978e-06	0.000119462	3.60525e-05
O35874	Slc1a4	Neutral amino acid transporter A	SATT_MOUSE	inf	1.33294e-06	0.000121922	2.97022e-05
Q62083	Pick1	PRKCA-binding protein	PICK1_MOUSE	inf	1.4626e-06	0.000121922	1.64727e-05
Q9QWW1;Q9QWW1-2	Homer2	Homer protein homolog 2;Isoform 2 of Homer protein homolog 2	HOME2_MOUSE	inf	1.49022e-06	0.000121922	2.90785e-05
Q9DAW9	Cnn3	Calponin-3	CNN3_MOUSE	inf	1.53334e-06	0.000121922	4.05571e-05
Q3UUF8	Ankrd34b	Ankyrin repeat domain-containing protein 34B	AN34B_MOUSE	inf	1.53651e-06	0.000121922	0.000144059
Q3UHD2	Gfod1	Glucose-fructose oxidoreductase domain-containing protein 1	GFOD1_MOUSE	inf	1.55174e-06	0.000121922	3.78633e-05
D3YZP9	Ccdc6	Coiled-coil domain-containing protein 6	CCDC6_MOUSE	inf	1.68175e-06	0.000123389	2.98177e-05
Q8BVQ5	Ppme1	Protein phosphatase methylesterase 1	PPME1_MOUSE	inf	1.71822e-06	0.000123389	7.1725e-05
O88485	Dync1i1	Cytoplasmic dynein 1 intermediate chain 1	DC1I1_MOUSE	inf	1.72402e-06	0.000123389	2.74909e-05
Q8BGU5;Q8BGU5-2	Ccny	Cyclin-Y;Isoform 2 of Cyclin-Y	CCNY_MOUSE	inf	1.74988e-06	0.000123389	2.73285e-05
P12849	Prkar1b	cAMP-dependent protein kinase type I-beta regulatory subunit	KAP1_MOUSE	inf	1.84481e-06	0.000126409	4.59733e-05
Q68EF6	Begain	Brain-enriched guanylate kinase-associated protein	BEGIN_MOUSE	inf	1.90022e-06	0.000126409	4.64525e-05
Q91Z61	Diras1	GTP-binding protein Di-Ras1	DIRA1_MOUSE	inf	1.93061e-06	0.000126409	6.34059e-05
P63087;P63087-2	Ppp1cc	Serine/threonine-protein phosphatase PP1-gamma catalytic subunit;Isoform 2 of Serine/threonine-protein phosphatase PP1-gamma catalytic subunit	PP1G_MOUSE	inf	2.00909e-06	0.000127864	5.61891e-05
Q6NVE8	Wdr44	WD repeat-containing protein 44	WDR44_MOUSE	inf	2.05156e-06	0.000127864	3.71193e-05
Q9QZB7	Actr10	Actin-related protein 10	ARP10_MOUSE	inf	2.13204e-06	0.000127864	1.99659e-05
Q8K212	Pacs1	Phosphofurin acidic cluster sorting protein 1	PACS1_MOUSE	inf	2.19224e-06	0.000127864	3.49261e-05
Q9CWF2	Tubb2b	Tubulin beta-2B chain	TBB2B_MOUSE	inf	2.2304e-06	0.000127864	0.000219909
Q99KN9	Clint1	Clathrin interactor 1	EPN4_MOUSE	inf	2.23183e-06	0.000127864	8.73533e-05
Q8VHH5	Agap3	Arf-GAP with GTPase, ANK repeat and PH domain-containing protein 3	AGAP3_MOUSE	inf	2.33015e-06	0.000127864	4.34708e-05
P46935	Nedd4	E3 ubiquitin-protein ligase NEDD4	NEDD4_MOUSE	inf	2.3744e-06	0.000127864	1.95353e-05
Q9WVQ1;Q9WVQ1-2;Q9WVQ1-4	Magi2	Membrane-associated guanylate kinase, WW and PDZ domain-containing protein 2;Isoform 2 of Membrane-associated guanylate kinase, WW and PDZ domain-containing protein 2;Isoform 4 of Membrane-associated guanylate kinase, WW and PDZ domain-containing protein 2	MAGI2_MOUSE	inf	2.37936e-06	0.000127864	5.51848e-05
Q9QY42;Q9QY42-2;Q9QY42-3	Gpr37	Prosaposin receptor GPR37;Isoform 2 of Prosaposin receptor GPR37;Isoform 3 of Prosaposin receptor GPR37	GPR37_MOUSE	inf	2.41778e-06	0.000127864	2.52988e-05
P21995	Emb	Embigin	EMB_MOUSE	inf	2.47214e-06	0.000128272	5.74416e-05
Q91YX5	Lpgat1	Acyl-CoA:lysophosphatidylglycerol acyltransferase 1	LGAT1_MOUSE	inf	2.57447e-06	0.000131107	1.54068e-05
P28658	Atxn10	Ataxin-10	ATX10_MOUSE	inf	2.62318e-06	0.000131159	3.01245e-05
O08576;O08576-2;O08576-3;O08576-4	Rundc3a	RUN domain-containing protein 3A;Isoform 2 of RUN domain-containing protein 3A;Isoform 3 of RUN domain-containing protein 3A;Isoform 4 of RUN domain-containing protein 3A	RUN3A_MOUSE	inf	2.68647e-06	0.000131925	2.4575e-05
Q9WV34;Q9WV34-2	Mpp2	MAGUK p55 subfamily member 2;Isoform 2 of MAGUK p55 subfamily member 2	MPP2_MOUSE	inf	2.80836e-06	0.000135491	9.60512e-05
Q91VR5	Ddx1	ATP-dependent RNA helicase DDX1	DDX1_MOUSE	inf	3.02619e-06	0.000143483	3.63747e-05
O54781	Srpk2	SRSF protein kinase 2	SRPK2_MOUSE	inf	3.13889e-06	0.000144409	3.5e-05
Q3TYD6	Lmtk2	Serine/threonine-protein kinase LMTK2	LMTK2_MOUSE	inf	3.15073e-06	0.000144409	1.41372e-05
Q80W47	Wipi2	WD repeat domain phosphoinositide-interacting protein 2	WIPI2_MOUSE	inf	3.33346e-06	0.000146061	6.20491e-05
Q8CIN4	Pak2	Serine/threonine-protein kinase PAK 2	PAK2_MOUSE	inf	3.37797e-06	0.000146061	2.39502e-05
Q8BGH4	Reep1	Receptor expression-enhancing protein 1	REEP1_MOUSE	inf	3.43104e-06	0.000146061	2.20264e-05
P24529	Th	Tyrosine 3-monooxygenase	TY3H_MOUSE	inf	3.43288e-06	0.000146061	0.000238276
Q8C167;Q8C167-2	Prepl	Prolyl endopeptidase-like;Isoform 2 of Prolyl endopeptidase-like	PPCEL_MOUSE	inf	3.48964e-06	0.000146061	3.49248e-05
Q8VE47	Uba5	Ubiquitin-like modifier-activating enzyme 5	UBA5_MOUSE	inf	3.65823e-06	0.000146061	5.72262e-05
Q8CHK3	Mboat7	Lysophospholipid acyltransferase 7	MBOA7_MOUSE	inf	3.667e-06	0.000146061	1.85239e-05
Q6P1F6	Ppp2r2a	Serine/threonine-protein phosphatase 2A 55 kDa regulatory subunit B alpha isoform	2ABA_MOUSE	inf	3.79981e-06	0.000146061	4.17892e-05
Q03173;Q03173-4;Q03173-5	Enah	Protein enabled homolog;Isoform 3 of Protein enabled homolog;Isoform 4 of Protein enabled homolog	ENAH_MOUSE	inf	3.80035e-06	0.000146061	2.14808e-05
Q8CC27;Q8CC27-2;Q8CC27-3;Q8CC27-4	Cacnb2	Voltage-dependent L-type calcium channel subunit beta-2;Isoform 2 of Voltage-dependent L-type calcium channel subunit beta-2;Isoform 3 of Voltage-dependent L-type calcium channel subunit beta-2;Isoform 4 of Voltage-dependent L-type calcium channel subunit beta-2	CACB2_MOUSE	inf	3.81067e-06	0.000146061	1.03338e-05
O88487	Dync1i2	Cytoplasmic dynein 1 intermediate chain 2	DC1I2_MOUSE	inf	3.82214e-06	0.000146061	1.07778e-05
Q3UJU9	Rmdn3	Regulator of microtubule dynamics protein 3	RMD3_MOUSE	inf	3.96379e-06	0.000146061	3.56278e-05
Q9CQU5	Zwint	ZW10 interactor	ZWINT_MOUSE	inf	4.05795e-06	0.000146061	2.59312e-05
Q3UHC7;Q3UHC7-2;Q3UHC7-3;Q3UHC7-4	Dab2ip	Disabled homolog 2-interacting protein;Isoform 2 of Disabled homolog 2-interacting protein;Isoform 3 of Disabled homolog 2-interacting protein;Isoform 4 of Disabled homolog 2-interacting protein	DAB2P_MOUSE	inf	4.06639e-06	0.000146061	6.59059e-05
P68037	Ube2l3	Ubiquitin-conjugating enzyme E2 L3	UB2L3_MOUSE	inf	4.10619e-06	0.000146061	1.97914e-05
Q9ERD7	Tubb3	Tubulin beta-3 chain	TBB3_MOUSE	5.35417	4.11424e-06	0.000146061	0.000611755
Q8BGB7;Q8BGB7-2	Enoph1	Enolase-phosphatase E1;Isoform 2 of Enolase-phosphatase E1	ENOPH_MOUSE	inf	4.23615e-06	0.000146061	2.74501e-05
Q3TFD2;Q3TFD2-2	Lpcat1	Lysophosphatidylcholine acyltransferase 1;Isoform 2 of Lysophosphatidylcholine acyltransferase 1	PCAT1_MOUSE	inf	4.29415e-06	0.000146061	3.62608e-05
Q9D358	Acp1	Low molecular weight phosphotyrosine protein phosphatase	PPAC_MOUSE	3.32253	4.34692e-06	0.000146061	0.000155096
Q62465	Vat1	Synaptic vesicle membrane protein VAT-1 homolog	VAT1_MOUSE	1.93586	4.39683e-06	0.000146061	5.91789e-05
O35449	Prrt1	Proline-rich transmembrane protein 1	PRRT1_MOUSE	inf	4.4492e-06	0.000146061	8.74716e-05
Q6P9S0	Mtss2	Protein MTSS 2	MTSS2_MOUSE	inf	4.48652e-06	0.000146061	9.27273e-05
Q8R361	Rab11fip5	Rab11 family-interacting protein 5	RFIP5_MOUSE	inf	4.57573e-06	0.000146061	6.40935e-05
F8VPU2	Farp1	FERM, ARHGEF and pleckstrin domain-containing protein 1	FARP1_MOUSE	inf	4.60338e-06	0.000146061	4.11812e-05
Q9Z2D3	Gsdme	Gasdermin-E	GSDME_MOUSE	inf	4.61317e-06	0.000146061	1.90283e-05
B9EJ86	Osbpl8	Oxysterol-binding protein-related protein 8	OSBL8_MOUSE	inf	4.64e-06	0.000146061	3.98866e-05
Q8BIZ1	Anks1b	Ankyrin repeat and sterile alpha motif domain-containing protein 1B	ANS1B_MOUSE	inf	4.64183e-06	0.000146061	6.22801e-05
Q3TMH2	Scrn3	Secernin-3	SCRN3_MOUSE	inf	4.67397e-06	0.000146061	5.62314e-05
Q9QYB5;Q9QYB5-2	Add3	Gamma-adducin;Isoform 1 of Gamma-adducin	ADDG_MOUSE	inf	4.89759e-06	0.000146626	2.6991e-05
Q9R1Q9	Atp6ap1	V-type proton ATPase subunit S1	VAS1_MOUSE	inf	4.93908e-06	0.000146626	6.22879e-06
P70297	Stam	Signal transducing adapter molecule 1	STAM1_MOUSE	inf	4.96546e-06	0.000146626	8.41765e-05
Q91VZ6	Smap1	Stromal membrane-associated protein 1	SMAP1_MOUSE	inf	4.97951e-06	0.000146626	2.58411e-05
Q9CWE0	Mtfr1l	Mitochondrial fission regulator 1-like	MFR1L_MOUSE	inf	5.01423e-06	0.000146626	1.1351e-05
Q2TBE6	Pi4k2a	Phosphatidylinositol 4-kinase type 2-alpha	P4K2A_MOUSE	inf	5.0163e-06	0.000146626	2.93848e-05
Q9Z2A0	Pdpk1	3-phosphoinositide-dependent protein kinase 1	PDPK1_MOUSE	inf	5.10575e-06	0.000146626	2.23471e-05
O54829	Rgs7	Regulator of G-protein signaling 7	RGS7_MOUSE	inf	5.12708e-06	0.000146626	7.15952e-05
P28028	Braf	Serine/threonine-protein kinase B-raf	BRAF_MOUSE	inf	5.17191e-06	0.000146626	3.15795e-05
Q06138	Cab39	Calcium-binding protein 39	CAB39_MOUSE	inf	5.30177e-06	0.000146663	4.21717e-05
O88746	Tom1	Target of Myb protein 1	TOM1_MOUSE	inf	5.32636e-06	0.000146663	1.54256e-05
Q8VHJ5	Mark1	Serine/threonine-protein kinase MARK1	MARK1_MOUSE	inf	5.5509e-06	0.000146663	1.68081e-05
P42232	Stat5b	Signal transducer and activator of transcription 5B	STA5B_MOUSE	inf	5.55846e-06	0.000146663	2.16853e-05
Q9DBE8	Alg2	Alpha-1,3/1,6-mannosyltransferase ALG2	ALG2_MOUSE	inf	5.56738e-06	0.000146663	0.000119332
Q6P8X1	Snx6	Sorting nexin-6	SNX6_MOUSE	inf	5.62407e-06	0.000146663	4.00726e-05
P47809	Map2k4	Dual specificity mitogen-activated protein kinase kinase 4	MP2K4_MOUSE	inf	5.65403e-06	0.000146663	3.06955e-05
Q8C437;Q8C437-3	Pex5l	PEX5-related protein;Isoform 3 of PEX5-related protein	PEX5R_MOUSE	inf	5.71157e-06	0.000146663	7.24846e-05
P27612	Plaa	Phospholipase A-2-activating protein	PLAP_MOUSE	inf	5.77707e-06	0.000146663	1.71929e-05
Q9D1P4	Chordc1	Cysteine and histidine-rich domain-containing protein 1	CHRD1_MOUSE	inf	5.82348e-06	0.000146663	1.47829e-05
P35290	Rab24	Ras-related protein Rab-24	RAB24_MOUSE	inf	5.84299e-06	0.000146663	2.37155e-05
Q9R1L5	Mast1	Microtubule-associated serine/threonine-protein kinase 1	MAST1_MOUSE	inf	5.89481e-06	0.000146663	1.70206e-05
Q8VHL1	Setd7	Histone-lysine N-methyltransferase SETD7	SETD7_MOUSE	inf	5.90369e-06	0.000146663	7.67481e-05
P97390	Vps45	Vacuolar protein sorting-associated protein 45	VPS45_MOUSE	inf	5.92036e-06	0.000146663	1.4434e-05
Q61036;Q61036-2	Pak3	Serine/threonine-protein kinase PAK 3;Isoform 2 of Serine/threonine-protein kinase PAK 3	PAK3_MOUSE	inf	5.9732e-06	0.000146663	2.1293e-05
P46737	Brcc3	Lys-63-specific deubiquitinase BRCC36	BRCC3_MOUSE	inf	6.11829e-06	0.000148896	8.51912e-06
Q5M8N0	Cnrip1	CB1 cannabinoid receptor-interacting protein 1	CNRP1_MOUSE	inf	6.24975e-06	0.000150224	2.28984e-05
Q6P5F7	Ttyh3	Protein tweety homolog 3	TTYH3_MOUSE	inf	6.28208e-06	0.000150224	0.000135311
Q8C0L0	Tmx4	Thioredoxin-related transmembrane protein 4	TMX4_MOUSE	inf	6.37195e-06	0.000151059	1.38743e-05
Q66L44	Cbarp	Voltage-dependent calcium channel beta subunit-associated regulatory protein	CBARP_MOUSE	inf	6.50903e-06	0.00015299	0.000122285
O70305;O70305-2;O70305-3	Atxn2	Ataxin-2;Isoform 2 of Ataxin-2;Isoform 3 of Ataxin-2	ATX2_MOUSE	inf	6.57598e-06	0.000153254	1.25206e-05
Q9Z2W0	Dnpep	Aspartyl aminopeptidase	DNPEP_MOUSE	inf	6.64914e-06	0.000153657	1.17092e-05
Q3UVL4	Vps51	Vacuolar protein sorting-associated protein 51 homolog	VPS51_MOUSE	inf	6.75185e-06	0.00015473	2.61642e-05
O55106	Strn	Striatin	STRN_MOUSE	inf	6.90176e-06	0.000156187	1.85331e-05
O88544	Cops4	COP9 signalosome complex subunit 4	CSN4_MOUSE	inf	6.92903e-06	0.000156187	1.85664e-05
Q3TCJ1	Abraxas2	BRISC complex subunit Abraxas 2	ABRX2_MOUSE	inf	6.99301e-06	0.000156348	1.8547e-05
Q5SXY1;Q5SXY1-2;Q5SXY1-3	Specc1	Cytospin-B;Isoform 2 of Cytospin-B;Isoform 4 of Cytospin-B	CYTSB_MOUSE	inf	7.20751e-06	0.000157952	6.68341e-05
Q9EPR4	Slc23a2	Solute carrier family 23 member 2	S23A2_MOUSE	inf	7.29591e-06	0.000157952	8.96161e-05
Q8C0P5	Coro2a	Coronin-2A	COR2A_MOUSE	inf	7.38907e-06	0.000157952	3.33899e-05
Q8WTY4	Ciapin1	Anamorsin	CPIN1_MOUSE	inf	7.38985e-06	0.000157952	3.54692e-05
Q7TN29	Smap2	Stromal membrane-associated protein 2	SMAP2_MOUSE	inf	7.39041e-06	0.000157952	0.000124145
P37040	Por	NADPH--cytochrome P450 reductase	NCPR_MOUSE	inf	7.40939e-06	0.000157952	6.639e-05
Q99K70	Rragc	Ras-related GTP-binding protein C	RRAGC_MOUSE	inf	7.62599e-06	0.000159468	8.15361e-05
Q91ZM2;Q91ZM2-2;Q91ZM2-3;Q91ZM2-4;Q91ZM2-6	Sh2b1	SH2B adapter protein 1;Isoform 2 of SH2B adapter protein 1;Isoform 3 of SH2B adapter protein 1;Isoform 4 of SH2B adapter protein 1;Isoform 6 of SH2B adapter protein 1	SH2B1_MOUSE	inf	7.64334e-06	0.000159468	1.67848e-05
Q91XM9;Q91XM9-2;Q91XM9-3;Q91XM9-4;Q91XM9-6;Q91XM9-7	Dlg2	Disks large homolog 2;Isoform 2 of Disks large homolog 2;Isoform 3 of Disks large homolog 2;Isoform 4 of Disks large homolog 2;Isoform 6 of Disks large homolog 2;Isoform 7 of Disks large homolog 2	DLG2_MOUSE	inf	7.65679e-06	0.000159468	0.000191005
Q8K3H0	Appl1	DCC-interacting protein 13-alpha	DP13A_MOUSE	inf	7.71245e-06	0.000159468	1.97235e-05
Q9DBL7	Coasy	Bifunctional coenzyme A synthase	COASY_MOUSE	inf	7.94682e-06	0.000161705	2.70209e-05
Q9Z2W9	Gria3	Glutamate receptor 3	GRIA3_MOUSE	inf	7.97614e-06	0.000161705	3.79811e-05
Q68FF6	Git1	ARF GTPase-activating protein GIT1	GIT1_MOUSE	inf	7.99703e-06	0.000161705	2.93732e-05
P16460	Ass1	Argininosuccinate synthase	ASSY_MOUSE	inf	8.35174e-06	0.000166148	3.1445e-05
Q9CX34	Sugt1	Protein SGT1 homolog	SGT1_MOUSE	inf	8.40377e-06	0.000166148	0.000155845
Q9JHU2	Palmd	Palmdelphin	PALMD_MOUSE	inf	8.4559e-06	0.000166148	6.89663e-05
O35343	Kpna4	Importin subunit alpha-3	IMA3_MOUSE	inf	8.45843e-06	0.000166148	7.89677e-06
Q8K2I1	Fntb	Protein farnesyltransferase subunit beta	FNTB_MOUSE	inf	8.6149e-06	0.000166588	3.2491e-05
Q8C460;Q8C460-2	Eri3	ERI1 exoribonuclease 3;Isoform 2 of ERI1 exoribonuclease 3	ERI3_MOUSE	inf	8.67348e-06	0.000166588	2.27535e-05
Q9JKY5	Hip1r	Huntingtin-interacting protein 1-related protein	HIP1R_MOUSE	inf	8.80999e-06	0.000166588	4.88303e-05
Q3UNH4	Gprin1	G protein-regulated inducer of neurite outgrowth 1	GRIN1_MOUSE	inf	8.89704e-06	0.000166588	0.000120163
Q61831;Q61831-2	Mapk10	Mitogen-activated protein kinase 10;Isoform Alpha-1 of Mitogen-activated protein kinase 10	MK10_MOUSE	inf	8.91351e-06	0.000166588	3.61671e-05
Q6PH08	Erc2	ERC protein 2	ERC2_MOUSE	inf	8.95139e-06	0.000166588	2.21448e-05
Q9EQG9;Q9EQG9-2	Cert1	Ceramide transfer protein;Isoform 2 of Ceramide transfer protein	CERT_MOUSE	inf	8.96452e-06	0.000166588	2.58596e-05
Q9QZQ1	Afdn	Afadin	AFAD_MOUSE	inf	8.96544e-06	0.000166588	2.64517e-05
Q9WUM3	Coro1b	Coronin-1B	COR1B_MOUSE	inf	9.35039e-06	0.00017164	2.70146e-05
Q8VD37-8	Sgip1	Isoform 7 of SH3-containing GRB2-like protein 3-interacting protein 1	SGIP1_MOUSE	inf	9.43478e-06	0.00017164	4.85832e-05
Q80TY0;Q80TY0-2;Q80TY0-3	Fnbp1	Formin-binding protein 1;Isoform 2 of Formin-binding protein 1;Isoform 3 of Formin-binding protein 1	FNBP1_MOUSE	inf	9.4942e-06	0.00017164	2.46786e-05
Q9Z0F7	Sncg	Gamma-synuclein	SYUG_MOUSE	inf	9.52156e-06	0.00017164	0.000257717
Q9CXW3	Cacybp	Calcyclin-binding protein	CYBP_MOUSE	inf	9.6348e-06	0.00017164	0.000232383
Q9Z1R2	Bag6	Large proline-rich protein BAG6	BAG6_MOUSE	inf	9.77508e-06	0.00017164	3.19198e-05
Q80UW2	Fbxo2	F-box only protein 2	FBX2_MOUSE	inf	9.86636e-06	0.00017164	0.000124008
A2ALS5;A2ALS5-2;A2ALS5-3	Rap1gap	Rap1 GTPase-activating protein 1;Isoform 2 of Rap1 GTPase-activating protein 1;Isoform 3 of Rap1 GTPase-activating protein 1	RPGP1_MOUSE	inf	9.88527e-06	0.00017164	6.15653e-05
Q8C0D4	Arhgap12	Rho GTPase-activating protein 12	RHG12_MOUSE	inf	9.89503e-06	0.00017164	1.13794e-05
Q9Z2Y3	Homer1	Homer protein homolog 1	HOME1_MOUSE	inf	9.91499e-06	0.00017164	5.54213e-05
Q9DCT8	Crip2	Cysteine-rich protein 2	CRIP2_MOUSE	inf	9.92389e-06	0.00017164	4.73126e-05
Q9CQD1	Rab5a	Ras-related protein Rab-5A	RAB5A_MOUSE	4.45809	9.99224e-06	0.000171742	0.000358443
Q6PHN9	Rab35	Ras-related protein Rab-35	RAB35_MOUSE	inf	1.00662e-05	0.000171775	3.56368e-05
Q922Q1	Mtarc2	Mitochondrial amidoxime reducing component 2	MARC2_MOUSE	inf	1.01191e-05	0.000171775	3.07879e-05
Q68FM6	Elfn2	Protein phosphatase 1 regulatory subunit 29	PPR29_MOUSE	inf	1.03924e-05	0.000175332	0.000158211
P49135	Ercc3	General transcription and DNA repair factor IIH helicase subunit XPB	ERCC3_MOUSE	inf	1.05754e-05	0.000177332	6.79865e-06
Q9R1Q8	Tagln3	Transgelin-3	TAGL3_MOUSE	5.24311	1.09261e-05	0.000181443	0.000470495
Q9JME5	Ap3b2	AP-3 complex subunit beta-2	AP3B2_MOUSE	inf	1.09525e-05	0.000181443	8.31425e-05
Q9D1E6	Tbcb	Tubulin-folding cofactor B	TBCB_MOUSE	inf	1.11895e-05	0.000183664	4.80087e-05
P34022	Ranbp1	Ran-specific GTPase-activating protein	RANG_MOUSE	inf	1.12648e-05	0.000183664	2.07912e-05
O35098;O35098-2	Dpysl4	Dihydropyrimidinase-related protein 4;Isoform 2 of Dihydropyrimidinase-related protein 4	DPYL4_MOUSE	inf	1.1287e-05	0.000183664	4.00841e-05
Q80X80	C2cd2l	Phospholipid transfer protein C2CD2L	C2C2L_MOUSE	inf	1.14087e-05	0.000184552	2.33185e-05
Q80TL0	Ppm1e	Protein phosphatase 1E	PPM1E_MOUSE	inf	1.17651e-05	0.000186283	5.04297e-05
Q61081	Cdc37	Hsp90 co-chaperone Cdc37	CDC37_MOUSE	inf	1.18805e-05	0.000186283	0.000123267
Q8CBY8;Q8CBY8-2	Dctn4	Dynactin subunit 4;Isoform 2 of Dynactin subunit 4	DCTN4_MOUSE	inf	1.18912e-05	0.000186283	7.81378e-05
Q6ZPJ0	Tex2	Testis-expressed protein 2	TEX2_MOUSE	inf	1.19549e-05	0.000186283	2.84896e-05
Q9D4H8	Cul2	Cullin-2	CUL2_MOUSE	inf	1.20809e-05	0.000186283	3.30223e-05
Q6ZQ58	Larp1	La-related protein 1	LARP1_MOUSE	inf	1.21377e-05	0.000186283	5.11756e-05
Q9CPX6	Atg3	Ubiquitin-like-conjugating enzyme ATG3	ATG3_MOUSE	inf	1.21639e-05	0.000186283	2.79483e-05
Q5SVL6	Rap1gap2	Rap1 GTPase-activating protein 2	RPGP2_MOUSE	inf	1.22456e-05	0.000186283	4.68803e-05
Q7TSY6;Q7TSY6-2;Q7TSY6-3;Q7TSY6-4;Q7TSY6-5;Q7TSY6-6	Celf4	CUGBP Elav-like family member 4;Isoform 2 of CUGBP Elav-like family member 4;Isoform 3 of CUGBP Elav-like family member 4;Isoform 4 of CUGBP Elav-like family member 4;Isoform 5 of CUGBP Elav-like family member 4;Isoform 6 of CUGBP Elav-like family member 4	CELF4_MOUSE	inf	1.22494e-05	0.000186283	6.56466e-05
P53810	Pitpna	Phosphatidylinositol transfer protein alpha isoform	PIPNA_MOUSE	inf	1.22529e-05	0.000186283	2.40172e-05
Q9R0N7-4	Syt7	Isoform 4 of Synaptotagmin-7	SYT7_MOUSE	inf	1.22608e-05	0.000186283	2.4272e-05
G3XA57;G3XA57-2	Rab11fip2	Rab11 family-interacting protein 2;Isoform 2 of Rab11 family-interacting protein 2	RFIP2_MOUSE	inf	1.2872e-05	0.000194338	9.92912e-06
Q9WUA6;Q9WUA6-2	Akt3	RAC-gamma serine/threonine-protein kinase;Isoform 2 of RAC-gamma serine/threonine-protein kinase	AKT3_MOUSE	inf	1.29323e-05	0.000194338	1.71339e-05
B1AZP2;B1AZP2-2	Dlgap4	Disks large-associated protein 4;Isoform 2 of Disks large-associated protein 4	DLGP4_MOUSE	inf	1.31154e-05	0.000196019	1.9725e-05
Q69Z98;Q69Z98-2;Q69Z98-3;Q69Z98-4	Brsk2	Serine/threonine-protein kinase BRSK2;Isoform 2 of Serine/threonine-protein kinase BRSK2;Isoform 3 of Serine/threonine-protein kinase BRSK2;Isoform 4 of Serine/threonine-protein kinase BRSK2	BRSK2_MOUSE	inf	1.31981e-05	0.000196188	1.89536e-05
Q07076	Anxa7	Annexin A7	ANXA7_MOUSE	3.95583	1.3301e-05	0.000196622	0.00026248
P62482	Kcnab2	Voltage-gated potassium channel subunit beta-2	KCAB2_MOUSE	4.57337	1.34739e-05	0.000196622	0.000227149
Q8VHI6	Wasf3	Wiskott-Aldrich syndrome protein family member 3	WASF3_MOUSE	inf	1.34996e-05	0.000196622	6.84715e-05
Q9DBR3;Q9DBR3-2;Q9DBR3-3	Armc8	Armadillo repeat-containing protein 8;Isoform 2 of Armadillo repeat-containing protein 8;Isoform 3 of Armadillo repeat-containing protein 8	ARMC8_MOUSE	inf	1.35133e-05	0.000196622	1.86525e-05
Q8BMI3	Gga3	ADP-ribosylation factor-binding protein GGA3	GGA3_MOUSE	inf	1.36345e-05	0.000197341	1.27365e-05
P26883	Fkbp1a	Peptidyl-prolyl cis-trans isomerase FKBP1A	FKB1A_MOUSE	inf	1.38852e-05	0.000199917	1.49761e-05
Q60631	Grb2	Growth factor receptor-bound protein 2	GRB2_MOUSE	inf	1.40532e-05	0.000201239	4.59647e-05
P39053-3	Dnm1	Isoform 3 of Dynamin-1	DYN1_MOUSE	inf	1.41746e-05	0.000201239	4.84804e-05
Q8C8T7	Elfn1	Protein ELFN1	ELFN1_MOUSE	inf	1.41965e-05	0.000201239	4.37625e-05
Q52KR3	Prune2	Protein prune homolog 2	PRUN2_MOUSE	6.30105	1.44415e-05	0.000201704	8.71956e-06
O08810	Eftud2	116 kDa U5 small nuclear ribonucleoprotein component	U5S1_MOUSE	inf	1.45452e-05	0.000201704	1.30134e-05
Q6IR34;Q6IR34-2	Gpsm1	G-protein-signaling modulator 1;Isoform 2 of G-protein-signaling modulator 1	GPSM1_MOUSE	inf	1.45678e-05	0.000201704	7.79147e-06
Q99K28;Q99K28-2	Arfgap2	ADP-ribosylation factor GTPase-activating protein 2;Isoform 2 of ADP-ribosylation factor GTPase-activating protein 2	ARFG2_MOUSE	inf	1.46473e-05	0.000201704	1.74854e-05
O08759;O08759-2	Ube3a	Ubiquitin-protein ligase E3A;Isoform 2 of Ubiquitin-protein ligase E3A	UBE3A_MOUSE	inf	1.47116e-05	0.000201704	5.56216e-05
Q9CWK8	Snx2	Sorting nexin-2	SNX2_MOUSE	inf	1.48234e-05	0.000201704	5.729e-05
Q9Z2H2	Rgs6	Regulator of G-protein signaling 6	RGS6_MOUSE	inf	1.48917e-05	0.000201704	1.94599e-05
Q99NE5;Q99NE5-3;Q99NE5-4;Q99NE5-5	Rims1	Regulating synaptic membrane exocytosis protein 1;Isoform 3 of Regulating synaptic membrane exocytosis protein 1;Isoform 4 of Regulating synaptic membrane exocytosis protein 1;Isoform 5 of Regulating synaptic membrane exocytosis protein 1	RIMS1_MOUSE	inf	1.49453e-05	0.000201704	2.14163e-05
Q6P1D5;Q6P1D5-2	Sez6l	Seizure 6-like protein;Isoform 2 of Seizure 6-like protein	SE6L1_MOUSE	inf	1.50286e-05	0.000201704	5.0017e-05
Q6PFD5	Dlgap3	Disks large-associated protein 3	DLGP3_MOUSE	inf	1.50921e-05	0.000201704	5.23015e-05
Q61584;Q61584-2;Q61584-3;Q61584-4;Q61584-5;Q61584-6	Fxr1	Fragile X mental retardation syndrome-related protein 1;Isoform A of Fragile X mental retardation syndrome-related protein 1;Isoform B of Fragile X mental retardation syndrome-related protein 1;Isoform C of Fragile X mental retardation syndrome-related protein 1;Isoform D of Fragile X mental retardation syndrome-related protein 1;Isoform F of Fragile X mental retardation syndrome-related protein 1	FXR1_MOUSE	inf	1.52683e-05	0.000201704	8.72713e-05
Q9JJC6	Rilpl1	RILP-like protein 1	RIPL1_MOUSE	inf	1.52913e-05	0.000201704	1.49345e-05
Q80Z38;Q80Z38-2;Q80Z38-3	Shank2	SH3 and multiple ankyrin repeat domains protein 2;Isoform 2 of SH3 and multiple ankyrin repeat domains protein 2;Isoform 3 of SH3 and multiple ankyrin repeat domains protein 2	SHAN2_MOUSE	inf	1.5299e-05	0.000201704	3.02133e-05
Q9D6Y9	Gbe1	1,4-alpha-glucan-branching enzyme	GLGB_MOUSE	inf	1.53721e-05	0.000201704	4.03333e-05
O35551;O35551-3;O35551-5	Rabep1	Rab GTPase-binding effector protein 1;Isoform 3 of Rab GTPase-binding effector protein 1;Isoform 5 of Rab GTPase-binding effector protein 1	RABE1_MOUSE	inf	1.54073e-05	0.000201704	2.59124e-05
Q8CHU3;Q8CHU3-2	Epn2	Epsin-2;Isoform 2 of Epsin-2	EPN2_MOUSE	inf	1.54638e-05	0.000201704	2.27481e-05
P10630;P10630-2	Eif4a2	Eukaryotic initiation factor 4A-II;Isoform 2 of Eukaryotic initiation factor 4A-II	IF4A2_MOUSE	inf	1.55323e-05	0.000201704	0.000255264
O35239	Ptpn9	Tyrosine-protein phosphatase non-receptor type 9	PTN9_MOUSE	inf	1.55495e-05	0.000201704	5.38181e-06
Q8BWS5	Gprin3	G protein-regulated inducer of neurite outgrowth 3	GRIN3_MOUSE	inf	1.59242e-05	0.000203984	2.66214e-05
Q99K46	Usp11	Ubiquitin carboxyl-terminal hydrolase 11	UBP11_MOUSE	inf	1.60518e-05	0.000203984	3.51345e-05
B9EJ80	Pdzd8	PDZ domain-containing protein 8	PDZD8_MOUSE	inf	1.60547e-05	0.000203984	3.41594e-05
Q61527;Q61527-2;Q61527-3	Erbb4	Receptor tyrosine-protein kinase erbB-4;Isoform JM-B CYT-2 of Receptor tyrosine-protein kinase erbB-4;Isoform JM-A CYT-2 of Receptor tyrosine-protein kinase erbB-4	ERBB4_MOUSE	inf	1.60959e-05	0.000203984	5.48873e-05
Q3TJZ6	Fam98a	Protein FAM98A	FA98A_MOUSE	inf	1.61618e-05	0.000203984	3.51569e-05
Q3TVA9;Q3TVA9-2	Ccdc136	Coiled-coil domain-containing protein 136;Isoform 2 of Coiled-coil domain-containing protein 136	CC136_MOUSE	inf	1.61776e-05	0.000203984	2.22933e-05
Q9CR95	Necap1	Adaptin ear-binding coat-associated protein 1	NECP1_MOUSE	inf	1.63181e-05	0.000203984	9.24814e-05
Q6RHR9;Q6RHR9-3	Magi1	Membrane-associated guanylate kinase, WW and PDZ domain-containing protein 1;Isoform 3 of Membrane-associated guanylate kinase, WW and PDZ domain-containing protein 1	MAGI1_MOUSE	inf	1.63188e-05	0.000203984	7.60798e-05
D3YZU1	Shank1	SH3 and multiple ankyrin repeat domains protein 1	SHAN1_MOUSE	inf	1.65453e-05	0.000205881	4.8213e-05
Q9ESJ4	Nckipsd	NCK-interacting protein with SH3 domain	SPN90_MOUSE	inf	1.667e-05	0.000206498	5.15847e-05
Q8BR92	Palm2	Paralemmin-2	PALM2_MOUSE	inf	1.67741e-05	0.000206855	5.46536e-05
Q8BGD9	Eif4b	Eukaryotic translation initiation factor 4B	IF4B_MOUSE	inf	1.6912e-05	0.000207169	6.35521e-05
O08586	Pten	Phosphatidylinositol 3,4,5-trisphosphate 3-phosphatase and dual-specificity protein phosphatase PTEN	PTEN_MOUSE	inf	1.69502e-05	0.000207169	1.51958e-05
Q8R5H6	Wasf1	Wiskott-Aldrich syndrome protein family member 1	WASF1_MOUSE	inf	1.72166e-05	0.000209391	1.66982e-05
Q80XA6	Reps2	RalBP1-associated Eps domain-containing protein 2	REPS2_MOUSE	inf	1.72843e-05	0.000209391	4.71141e-05
Q3UKC1	Tax1bp1	Tax1-binding protein 1 homolog	TAXB1_MOUSE	inf	1.78965e-05	0.000215098	1.84894e-05
A2AG50	Map7d2	MAP7 domain-containing protein 2	MA7D2_MOUSE	inf	1.79548e-05	0.000215098	5.91662e-05
P16054	Prkce	Protein kinase C epsilon type	KPCE_MOUSE	inf	1.80884e-05	0.000215098	2.21252e-05
Q8R0A7	Kiaa0513	Uncharacterized protein KIAA0513	K0513_MOUSE	inf	1.8152e-05	0.000215098	1.89554e-05
Q9EQP2	Ehd4	EH domain-containing protein 4	EHD4_MOUSE	inf	1.82163e-05	0.000215098	2.24082e-05
Q9WV18	Gabbr1	Gamma-aminobutyric acid type B receptor subunit 1	GABR1_MOUSE	inf	1.82496e-05	0.000215098	5.8932e-05
Q9D1H7;Q9D1H7-2	Get4	Golgi to ER traffic protein 4 homolog;Isoform 2 of Golgi to ER traffic protein 4 homolog	GET4_MOUSE	inf	1.83028e-05	0.000215098	1.92897e-05
Q8VD04	Gripap1	GRIP1-associated protein 1	GRAP1_MOUSE	inf	1.84348e-05	0.000215727	1.6791e-05
Q8CHH9;Q8CHH9-2	Septin8	Septin-8;Isoform 2 of Septin-8	SEPT8_MOUSE	inf	1.85979e-05	0.000216712	1.76038e-05
Q9Z0S1	Bpnt1	3'(2'),5'-bisphosphate nucleotidase 1	BPNT1_MOUSE	inf	1.86781e-05	0.000216729	1.07719e-05
A2RT62	Fbxl16	F-box/LRR-repeat protein 16	FXL16_MOUSE	inf	1.87932e-05	0.000217148	2.88669e-05
Q9R0Q7	Ptges3	Prostaglandin E synthase 3	TEBP_MOUSE	inf	1.90499e-05	0.000219194	6.71418e-05
Q80X50;Q80X50-2;Q80X50-3;Q80X50-4;Q80X50-5	Ubap2l	Ubiquitin-associated protein 2-like;Isoform 2 of Ubiquitin-associated protein 2-like;Isoform 3 of Ubiquitin-associated protein 2-like;Isoform 4 of Ubiquitin-associated protein 2-like;Isoform 5 of Ubiquitin-associated protein 2-like	UBP2L_MOUSE	inf	1.92488e-05	0.000219207	7.93844e-05
O70439	Stx7	Syntaxin-7	STX7_MOUSE	inf	1.93423e-05	0.000219207	7.07135e-05
Q8BTG7;Q8BTG7-3	Ndrg4	Protein NDRG4;Isoform 3 of Protein NDRG4	NDRG4_MOUSE	inf	1.93441e-05	0.000219207	7.65871e-05
Q6PGN3-3;Q6PGN3-4;Q6PGN3-5	Dclk2	Isoform 3 of Serine/threonine-protein kinase DCLK2;Isoform 4 of Serine/threonine-protein kinase DCLK2;Isoform 5 of Serine/threonine-protein kinase DCLK2	DCLK2_MOUSE	inf	1.937e-05	0.000219207	8.48823e-05
P47753	Capza1	F-actin-capping protein subunit alpha-1	CAZA1_MOUSE	inf	1.98187e-05	0.000222629	4.79453e-05
Q8BJU0;Q8BJU0-2	Sgta	Small glutamine-rich tetratricopeptide repeat-containing protein alpha;Isoform 2 of Small glutamine-rich tetratricopeptide repeat-containing protein alpha	SGTA_MOUSE	inf	1.98342e-05	0.000222629	1.10829e-05
Q91WJ0	Frs3	Fibroblast growth factor receptor substrate 3	FRS3_MOUSE	inf	2.01619e-05	0.000224286	1.10922e-05
Q8CCJ4	Amer2	APC membrane recruitment protein 2	AMER2_MOUSE	inf	2.02184e-05	0.000224286	2.78458e-05
Q9JJU8	Sh3bgrl	SH3 domain-binding glutamic acid-rich-like protein	SH3L1_MOUSE	inf	2.03208e-05	0.000224286	1.5222e-05
Q8BY87;Q8BY87-2	Usp47	Ubiquitin carboxyl-terminal hydrolase 47;Isoform 2 of Ubiquitin carboxyl-terminal hydrolase 47	UBP47_MOUSE	inf	2.0324e-05	0.000224286	2.03203e-05
O55042;O55042-2	Snca	Alpha-synuclein;Isoform 2 of Alpha-synuclein	SYUA_MOUSE	2.35013	2.03897e-05	0.000224286	0.000626003
P28656	Nap1l1	Nucleosome assembly protein 1-like 1	NP1L1_MOUSE	inf	2.07381e-05	0.0002268	6.57802e-05
Q80UJ7	Rab3gap1	Rab3 GTPase-activating protein catalytic subunit	RB3GP_MOUSE	inf	2.07831e-05	0.0002268	5.40894e-05
Q91XL9;Q91XL9-2;Q91XL9-3	Osbpl1a	Oxysterol-binding protein-related protein 1;Isoform 2 of Oxysterol-binding protein-related protein 1;Isoform 3 of Oxysterol-binding protein-related protein 1	OSBL1_MOUSE	inf	2.09374e-05	0.000227015	1.05876e-05
P59108	Cpne2	Copine-2	CPNE2_MOUSE	inf	2.09679e-05	0.000227015	3.85095e-05
O35345	Kpna6	Importin subunit alpha-7	IMA7_MOUSE	inf	2.1662e-05	0.000232916	2.0732e-05
P61202;P61202-2	Cops2	COP9 signalosome complex subunit 2;Isoform 2 of COP9 signalosome complex subunit 2	CSN2_MOUSE	inf	2.16824e-05	0.000232916	3.40307e-05
Q8BGK5	Slc35f1	Solute carrier family 35 member F1	S35F1_MOUSE	inf	2.17674e-05	0.000232919	1.33895e-05
P56371	Rab4a	Ras-related protein Rab-4A	RAB4A_MOUSE	inf	2.19041e-05	0.000233474	3.48243e-05
Q80VC9;Q80VC9-10;Q80VC9-11;Q80VC9-12;Q80VC9-14;Q80VC9-2;Q80VC9-3;Q80VC9-4;Q80VC9-5	Camsap3	Calmodulin-regulated spectrin-associated protein 3;Isoform 10 of Calmodulin-regulated spectrin-associated protein 3;Isoform 11 of Calmodulin-regulated spectrin-associated protein 3;Isoform 12 of Calmodulin-regulated spectrin-associated protein 3;Isoform 14 of Calmodulin-regulated spectrin-associated protein 3;Isoform 2 of Calmodulin-regulated spectrin-associated protein 3;Isoform 3 of Calmodulin-…	CAMP3_MOUSE	inf	2.20581e-05	0.000234208	1.84513e-05
Q8VCT3	Rnpep	Aminopeptidase B	AMPB_MOUSE	inf	2.23881e-05	0.000236797	1.8453e-05
O54834;O54834-2;O54834-3;O54834-4	Arhgap6	Rho GTPase-activating protein 6;Isoform 2 of Rho GTPase-activating protein 6;Isoform 3 of Rho GTPase-activating protein 6;Isoform 4 of Rho GTPase-activating protein 6	RHG06_MOUSE	inf	2.25477e-05	0.000237572	2.26902e-05
O35954	Pitpnm1	Membrane-associated phosphatidylinositol transfer protein 1	PITM1_MOUSE	inf	2.30335e-05	0.000241764	0.000102722
Q9JJR9	Nrip3	Nuclear receptor-interacting protein 3	NRIP3_MOUSE	inf	2.31591e-05	0.000242158	3.00784e-05
Q8BUK6	Hook3	Protein Hook homolog 3	HOOK3_MOUSE	inf	2.33545e-05	0.000242878	1.52597e-05
Q9CZX0;Q9CZX0-2	Elp3	Elongator complex protein 3;Isoform 2 of Elongator complex protein 3	ELP3_MOUSE	inf	2.34046e-05	0.000242878	2.96934e-05
P51125;P51125-2;P51125-3;P51125-6	Cast	Calpastatin;Isoform 2 of Calpastatin;Isoform 3 of Calpastatin;Isoform 6 of Calpastatin	ICAL_MOUSE	inf	2.372e-05	0.000245225	2.2942e-05
P18760	Cfl1	Cofilin-1	COF1_MOUSE	3.09459	2.39497e-05	0.000246673	0.000248425
O70174	Chrna4	Neuronal acetylcholine receptor subunit alpha-4	ACHA4_MOUSE	inf	2.41861e-05	0.000247745	1.37417e-05
Q9Z140	Cpne6	Copine-6	CPNE6_MOUSE	inf	2.4234e-05	0.000247745	1.70698e-05
P50586	Tub	Tubby protein	TUB_MOUSE	inf	2.49144e-05	0.000253758	5.59298e-05
Q0VE82	Cpne7	Copine-7	CPNE7_MOUSE	inf	2.52073e-05	0.000255793	6.43571e-05
Q9Z0R4	Itsn1	Intersectin-1	ITSN1_MOUSE	inf	2.55261e-05	0.000257743	3.79463e-05
Q6A065	Cep170	Centrosomal protein of 170 kDa	CE170_MOUSE	7.84446	2.55869e-05	0.000257743	3.88983e-05
P15209;P15209-3;P15209-4	Ntrk2	BDNF/NT-3 growth factors receptor;Isoform L1 of BDNF/NT-3 growth factors receptor;Isoform L10 of BDNF/NT-3 growth factors receptor	NTRK2_MOUSE	inf	2.58523e-05	0.000258761	2.50164e-05
Q9D892	Itpa	Inosine triphosphate pyrophosphatase	ITPA_MOUSE	inf	2.58761e-05	0.000258761	2.12304e-05
Q64337;Q64337-2	Sqstm1	Sequestosome-1;Isoform 2 of Sequestosome-1	SQSTM_MOUSE	inf	2.61145e-05	0.000259465	4.15669e-05
Q80VP1;Q80VP1-2	Epn1	Epsin-1;Isoform 2 of Epsin-1	EPN1_MOUSE	inf	2.62375e-05	0.000259465	6.77806e-05
P31324	Prkar2b	cAMP-dependent protein kinase type II-beta regulatory subunit	KAP3_MOUSE	inf	2.63511e-05	0.000259465	5.37148e-05
A2A699	Fam171a2	Protein FAM171A2	F1712_MOUSE	inf	2.64374e-05	0.000259465	1.69708e-05
Q3U0M1;Q3U0M1-2	Trappc9	Trafficking protein particle complex subunit 9;Isoform 2 of Trafficking protein particle complex subunit 9	TPPC9_MOUSE	inf	2.64662e-05	0.000259465	3.43596e-05
Q9Z0H8	Clip2	CAP-Gly domain-containing linker protein 2	CLIP2_MOUSE	inf	2.66357e-05	0.000259465	1.844e-05
Q3USB7	Plcl1	Inactive phospholipase C-like protein 1	PLCL1_MOUSE	inf	2.6677e-05	0.000259465	7.94248e-06
P70303;P70303-2;P70303-3	Ctps2	CTP synthase 2;Isoform 2 of CTP synthase 2;Isoform 3 of CTP synthase 2	PYRG2_MOUSE	inf	2.67013e-05	0.000259465	2.11468e-05
Q8JZR6;Q8JZR6-2	Slc4a8	Electroneutral sodium bicarbonate exchanger 1;Isoform 2 of Electroneutral sodium bicarbonate exchanger 1	S4A8_MOUSE	inf	2.72694e-05	0.000263846	2.31044e-05
A2ADY9	Ddi2	Protein DDI1 homolog 2	DDI2_MOUSE	inf	2.7344e-05	0.000263846	8.42281e-06
Q78ZA7	Nap1l4	Nucleosome assembly protein 1-like 4	NP1L4_MOUSE	inf	2.76371e-05	0.000265741	3.58905e-05
Q9R1C6	Dgke	Diacylglycerol kinase epsilon	DGKE_MOUSE	inf	2.81764e-05	0.000269983	4.44377e-05
O09012;O09012-2	Pex5	Peroxisomal targeting signal 1 receptor;Isoform 2 of Peroxisomal targeting signal 1 receptor	PEX5_MOUSE	inf	2.84086e-05	0.000271037	2.51791e-05
Q61140	Bcar1	Breast cancer anti-estrogen resistance protein 1	BCAR1_MOUSE	inf	2.84835e-05	0.000271037	1.91322e-05
Q8BT60	Cpne3	Copine-3	CPNE3_MOUSE	2.97624	2.88038e-05	0.00027314	0.000219098
Q9QZN1	Fbxl17	F-box/LRR-repeat protein 17	FXL17_MOUSE	inf	3.0093e-05	0.000284384	2.09521e-05
Q62417;Q62417-2	Sorbs1	Sorbin and SH3 domain-containing protein 1;Isoform 2 of Sorbin and SH3 domain-containing protein 1	SRBS1_MOUSE	inf	3.04822e-05	0.000287076	4.41106e-05
Q9ER00	Stx12	Syntaxin-12	STX12_MOUSE	inf	3.0613e-05	0.000287323	0.000107167
Q8C129	Lnpep	Leucyl-cystinyl aminopeptidase	LCAP_MOUSE	inf	3.07174e-05	0.000287323	3.60336e-05
Q9QUR7	Pin1	Peptidyl-prolyl cis-trans isomerase NIMA-interacting 1	PIN1_MOUSE	inf	3.10716e-05	0.00028945	6.16825e-05
P22682	Cbl	E3 ubiquitin-protein ligase CBL	CBL_MOUSE	inf	3.13056e-05	0.00028945	1.49343e-05
Q9EQZ6;Q9EQZ6-3	Rapgef4	Rap guanine nucleotide exchange factor 4;Isoform 3 of Rap guanine nucleotide exchange factor 4	RPGF4_MOUSE	inf	3.13769e-05	0.00028945	2.47014e-05
Q8K2K6;Q8K2K6-1;Q8K2K6-3	Agfg1	Arf-GAP domain and FG repeat-containing protein 1;Isoform 1 of Arf-GAP domain and FG repeat-containing protein 1;Isoform 3 of Arf-GAP domain and FG repeat-containing protein 1	AGFG1_MOUSE	inf	3.14359e-05	0.00028945	4.12733e-05
Q5RJI5	Brsk1	Serine/threonine-protein kinase BRSK1	BRSK1_MOUSE	inf	3.14711e-05	0.00028945	1.52386e-05
Q9JKC8	Ap3m1	AP-3 complex subunit mu-1	AP3M1_MOUSE	inf	3.16789e-05	0.000290389	1.80906e-05
Q9D6K5	Synj2bp	Synaptojanin-2-binding protein	SYJ2B_MOUSE	inf	3.19271e-05	0.000291693	6.39617e-05
Q9D1X0	Nol3	Nucleolar protein 3	NOL3_MOUSE	inf	3.20965e-05	0.000292269	8.65214e-05
Q8K341;Q8K341-3;Q8K341-4	Atat1	Alpha-tubulin N-acetyltransferase 1;Isoform 3 of Alpha-tubulin N-acetyltransferase 1;Isoform 4 of Alpha-tubulin N-acetyltransferase 1	ATAT_MOUSE	inf	3.23379e-05	0.000293496	2.4127e-05
Q80U56	Avl9	Late secretory pathway protein AVL9 homolog	AVL9_MOUSE	inf	3.2544e-05	0.000294329	9.86924e-06
Q8R2R9	Ap3m2	AP-3 complex subunit mu-2	AP3M2_MOUSE	inf	3.26438e-05	0.000294329	1.03323e-05
Q3B7Z2	Osbp	Oxysterol-binding protein 1	OSBP1_MOUSE	inf	3.28874e-05	0.000294648	1.38825e-05
Q8BUL6;Q8BUL6-2	Plekha1	Pleckstrin homology domain-containing family A member 1;Isoform 2 of Pleckstrin homology domain-containing family A member 1	PKHA1_MOUSE	inf	3.28934e-05	0.000294648	8.91533e-06
Q80YE4;Q80YE4-2;Q80YE4-3	Aatk	Serine/threonine-protein kinase LMTK1;Isoform 2 of Serine/threonine-protein kinase LMTK1;Isoform 3 of Serine/threonine-protein kinase LMTK1	LMTK1_MOUSE	inf	3.31157e-05	0.000295675	2.70095e-05
P10637-2	Mapt	Isoform Tau-A of Microtubule-associated protein tau	TAU_MOUSE	inf	3.34684e-05	0.000296915	6.86021e-05
P49443	Ppm1a	Protein phosphatase 1A	PPM1A_MOUSE	inf	3.34704e-05	0.000296915	3.91271e-05
P04627	Araf	Serine/threonine-protein kinase A-Raf	ARAF_MOUSE	inf	3.35887e-05	0.000297006	5.97388e-05
P62484	Abi2	Abl interactor 2	ABI2_MOUSE	inf	3.405e-05	0.00030012	3.70555e-05
Q6PDL0	Dync1li2	Cytoplasmic dynein 1 light intermediate chain 2	DC1L2_MOUSE	inf	3.429e-05	0.000300791	2.64651e-05
B2RUJ5;B2RUJ5-3	Apba1	Amyloid-beta A4 precursor protein-binding family A member 1;Isoform 3 of Amyloid-beta A4 precursor protein-binding family A member 1	APBA1_MOUSE	inf	3.43449e-05	0.000300791	0.000120955
Q9EPL8	Ipo7	Importin-7	IPO7_MOUSE	inf	3.4551e-05	0.000301273	3.41903e-05
Q6P1I6;Q6P1I6-2;Q6P1I6-3	Psd2	PH and SEC7 domain-containing protein 2;Isoform 2 of PH and SEC7 domain-containing protein 2;Isoform 3 of PH and SEC7 domain-containing protein 2	PSD2_MOUSE	inf	3.4619e-05	0.000301273	2.15912e-05
P70188;P70188-2	Kifap3	Kinesin-associated protein 3;Isoform KAP3B of Kinesin-associated protein 3	KIFA3_MOUSE	inf	3.51976e-05	0.000305294	2.3623e-05
Q80TV8;Q80TV8-2	Clasp1	CLIP-associating protein 1;Isoform 2 of CLIP-associating protein 1	CLAP1_MOUSE	inf	3.53031e-05	0.000305294	3.18932e-05
P26049	Gabra3	Gamma-aminobutyric acid receptor subunit alpha-3	GBRA3_MOUSE	inf	3.5675e-05	0.000307543	1.27562e-05
Q3UGC7	Eif3j1	Eukaryotic translation initiation factor 3 subunit J-A	EI3JA_MOUSE	inf	3.58834e-05	0.00030757	0.000218289
Q9CYT6	Cap2	Adenylyl cyclase-associated protein 2	CAP2_MOUSE	inf	3.59399e-05	0.00030757	1.54175e-05
A2ALU4;A2ALU4-2	Shroom2	Protein Shroom2;Isoform 2 of Protein Shroom2	SHRM2_MOUSE	inf	3.60137e-05	0.00030757	2.37345e-05
Q7TN99;Q7TN99-2;Q7TN99-3;Q7TN99-4	Cpeb3	Cytoplasmic polyadenylation element-binding protein 3;Isoform 2 of Cytoplasmic polyadenylation element-binding protein 3;Isoform 3 of Cytoplasmic polyadenylation element-binding protein 3;Isoform 4 of Cytoplasmic polyadenylation element-binding protein 3	CPEB3_MOUSE	inf	3.63584e-05	0.000309553	1.99089e-05
Q8C5L6	Inpp5k	Inositol polyphosphate 5-phosphatase K	INP5K_MOUSE	inf	3.68182e-05	0.000312501	1.61376e-05
Q6PEV3	Wipf2	WAS/WASL-interacting protein family member 2	WIPF2_MOUSE	inf	3.72339e-05	0.000315056	7.0465e-05
Q9QYF9	Ndrg3	Protein NDRG3	NDRG3_MOUSE	inf	3.73689e-05	0.000315229	2.77189e-05
Q9WUD1	Stub1	STIP1 homology and U box-containing protein 1	CHIP_MOUSE	inf	3.75582e-05	0.000315856	2.42784e-05
Q80U63;Q80U63-2	Mfn2	Mitofusin-2;Isoform 2 of Mitofusin-2	MFN2_MOUSE	inf	3.85832e-05	0.000323099	2.62538e-05
Q80SY6;Q80SY6-2;Q80SY6-4	Adal	Adenosine deaminase-like protein;Isoform 2 of Adenosine deaminase-like protein;Isoform 4 of Adenosine deaminase-like protein	ADAL_MOUSE	inf	3.86544e-05	0.000323099	1.00601e-05
Q8BXK8	Agap1	Arf-GAP with GTPase, ANK repeat and PH domain-containing protein 1	AGAP1_MOUSE	inf	3.87885e-05	0.000323231	2.74326e-05
Q78JW9	Ubfd1	Ubiquitin domain-containing protein UBFD1	UBFD1_MOUSE	inf	3.89052e-05	0.000323231	5.41913e-05
Q8VBT0	Tmx1	Thioredoxin-related transmembrane protein 1	TMX1_MOUSE	inf	3.90882e-05	0.000323773	3.45608e-05
Q8C052	Map1s	Microtubule-associated protein 1S	MAP1S_MOUSE	inf	3.93139e-05	0.000324664	1.65115e-05
O88543	Cops3	COP9 signalosome complex subunit 3	CSN3_MOUSE	inf	3.98323e-05	0.000327961	5.76981e-05
Q8BZM1	Glmn	Glomulin	GLMN_MOUSE	inf	4.01678e-05	0.000329736	1.09501e-05
Q8BLR2	Cpne4	Copine-4	CPNE4_MOUSE	inf	4.04423e-05	0.000331001	1.5845e-05
P33175	Kif5a	Kinesin heavy chain isoform 5A	KIF5A_MOUSE	inf	4.10066e-05	0.000334623	2.18736e-05
P41241	Csk	Tyrosine-protein kinase CSK	CSK_MOUSE	inf	4.11762e-05	0.000335011	1.31637e-05
Q8VIM9	Irgq	Immunity-related GTPase family Q protein	IRGQ_MOUSE	inf	4.12978e-05	0.000335011	3.61103e-05
Q5XJV6	Lmtk3	Serine/threonine-protein kinase LMTK3	LMTK3_MOUSE	inf	4.19943e-05	0.00033966	3.8126e-05
Q9D4C9	Clvs1	Clavesin-1	CLVS1_MOUSE	inf	4.22608e-05	0.000340813	0.000114261
Q9D880	Timm50	Mitochondrial import inner membrane translocase subunit TIM50	TIM50_MOUSE	inf	4.24095e-05	0.000341012	1.9664e-05
Q80WT5;Q80WT5-2	Aftph	Aftiphilin;Isoform 2 of Aftiphilin	AFTIN_MOUSE	inf	4.30893e-05	0.000345288	1.60781e-05
Q9ES56	Trappc4	Trafficking protein particle complex subunit 4	TPPC4_MOUSE	inf	4.31924e-05	0.000345288	8.10048e-05
D3YVF0	Akap5	A-kinase anchor protein 5	AKAP5_MOUSE	inf	4.35474e-05	0.000346359	1.09456e-05
Q60803	Traf3	TNF receptor-associated factor 3	TRAF3_MOUSE	inf	4.37221e-05	0.000346359	4.73673e-05
P62334	Psmc6	26S proteasome regulatory subunit 10B	PRS10_MOUSE	inf	4.38037e-05	0.000346359	4.93456e-05
Q80TM9	Nisch	Nischarin	NISCH_MOUSE	inf	4.38711e-05	0.000346359	1.44867e-05
P33173	Kif1a	Kinesin-like protein KIF1A	KIF1A_MOUSE	inf	4.3996e-05	0.000346359	6.42313e-05
Q61249	Igbp1	Immunoglobulin-binding protein 1	IGBP1_MOUSE	inf	4.44542e-05	0.000346359	1.88753e-05
Q9CQ65	Mtap	S-methyl-5'-thioadenosine phosphorylase	MTAP_MOUSE	inf	4.45433e-05	0.000346359	2.09426e-05
Q8R4E6;Q8R4E6-2	Purg	Purine-rich element-binding protein gamma;Isoform 2 of Purine-rich element-binding protein gamma	PURG_MOUSE	inf	4.45804e-05	0.000346359	6.04008e-05
P52479;P52479-2	Usp10	Ubiquitin carboxyl-terminal hydrolase 10;Isoform 2 of Ubiquitin carboxyl-terminal hydrolase 10	UBP10_MOUSE	inf	4.46656e-05	0.000346359	2.06573e-05
Q8CHG7	Rapgef2	Rap guanine nucleotide exchange factor 2	RPGF2_MOUSE	inf	4.46992e-05	0.000346359	1.2932e-05
P97792	Cxadr	Coxsackievirus and adenovirus receptor homolog	CXAR_MOUSE	inf	4.49045e-05	0.000346359	1.27063e-05
P12658	Calb1	Calbindin	CALB1_MOUSE	inf	4.49602e-05	0.000346359	5.40154e-05
Q8BWM0	Ptges2	Prostaglandin E synthase 2	PGES2_MOUSE	inf	4.50814e-05	0.000346359	1.87288e-05
Q9QWY8;Q9QWY8-2;Q9QWY8-3;Q9QWY8-4	Asap1	Arf-GAP with SH3 domain, ANK repeat and PH domain-containing protein 1;Isoform 2 of Arf-GAP with SH3 domain, ANK repeat and PH domain-containing protein 1;Isoform 3 of Arf-GAP with SH3 domain, ANK repeat and PH domain-containing protein 1;Isoform 4 of Arf-GAP with SH3 domain, ANK repeat and PH domain-containing protein 1	ASAP1_MOUSE	inf	4.51457e-05	0.000346359	9.04232e-06
Q6ZQ29-2	Taok2	Isoform 2 of Serine/threonine-protein kinase TAO2	TAOK2_MOUSE	inf	4.52156e-05	0.000346359	1.58683e-05
Q3V1L4	Nt5c2	Cytosolic purine 5'-nucleotidase	5NTC_MOUSE	inf	4.56659e-05	0.000348837	1.99203e-05
P42669	Pura	Transcriptional activator protein Pur-alpha	PURA_MOUSE	4.03459	4.58146e-05	0.000349003	0.000289531
Q91VN4	Chchd6	MICOS complex subunit Mic25	MIC25_MOUSE	inf	4.59781e-05	0.000349281	2.22349e-05
Q8BGD5	Cpt1c	Carnitine O-palmitoyltransferase 1, brain isoform	CPT1C_MOUSE	inf	4.62121e-05	0.000350092	2.59652e-05
P20357	Map2	Microtubule-associated protein 2	MTAP2_MOUSE	6.99042	4.67031e-05	0.000352804	0.00278977
O88545	Cops6	COP9 signalosome complex subunit 6	CSN6_MOUSE	inf	4.68267e-05	0.000352804	3.49599e-05
Q60790	Rasa3	Ras GTPase-activating protein 3	RASA3_MOUSE	inf	4.73982e-05	0.000356134	1.28807e-05
Q6PD03	Ppp2r5a	Serine/threonine-protein phosphatase 2A 56 kDa regulatory subunit alpha isoform	2A5A_MOUSE	inf	4.80406e-05	0.000359977	1.53094e-05
Q8R001;Q8R001-2	Mapre2	Microtubule-associated protein RP/EB family member 2;Isoform 2 of Microtubule-associated protein RP/EB family member 2	MARE2_MOUSE	inf	4.84795e-05	0.000362279	0.000127012
P56387	Dynlt3	Dynein light chain Tctex-type 3	DYLT3_MOUSE	inf	4.87702e-05	0.000363464	8.38782e-05
Q8VCH8	Ubxn4	UBX domain-containing protein 4	UBXN4_MOUSE	inf	4.89419e-05	0.000363568	1.10843e-05
Q7TME0	Plppr4	Phospholipid phosphatase-related protein type 4	PLPR4_MOUSE	inf	4.92092e-05	0.000363568	1.04625e-05
Q2NL51	Gsk3a	Glycogen synthase kinase-3 alpha	GSK3A_MOUSE	inf	4.92685e-05	0.000363568	0.000352557
A6H6A9	Rabgap1l	Rab GTPase-activating protein 1-like	RBG1L_MOUSE	inf	4.93657e-05	0.000363568	3.39735e-05
P05132;P05132-2	Prkaca	cAMP-dependent protein kinase catalytic subunit alpha;Isoform 2 of cAMP-dependent protein kinase catalytic subunit alpha	KAPCA_MOUSE	inf	4.94453e-05	0.000363568	3.41703e-05
Q3UVX5	Grm5	Metabotropic glutamate receptor 5	GRM5_MOUSE	inf	5.00382e-05	0.000366311	2.27246e-05
P62071	Rras2	Ras-related protein R-Ras2	RRAS2_MOUSE	inf	5.00848e-05	0.000366311	1.63061e-05
Q01405	Sec23a	Protein transport protein Sec23A	SC23A_MOUSE	inf	5.04169e-05	0.000367763	3.48189e-05
Q8VHK9	Dhx36	ATP-dependent DNA/RNA helicase DHX36	DHX36_MOUSE	inf	5.07224e-05	0.000369012	1.6661e-05
Q8R317;Q8R317-2	Ubqln1	Ubiquilin-1;Isoform 2 of Ubiquilin-1	UBQL1_MOUSE	inf	5.15984e-05	0.000374049	3.85767e-05
Q8R1F6;Q8R1F6-2	Hid1	Protein HID1;Isoform 2 of Protein HID1	HID1_MOUSE	inf	5.16867e-05	0.000374049	7.31185e-06
B1AVZ0	Uprt	Uracil phosphoribosyltransferase homolog	UPP_MOUSE	inf	5.22687e-05	0.000376326	9.61862e-06
Q8BH58	Tiprl	TIP41-like protein	TIPRL_MOUSE	inf	5.23937e-05	0.000376326	8.50026e-06
Q9JLV5	Cul3	Cullin-3	CUL3_MOUSE	inf	5.24119e-05	0.000376326	1.64372e-05
P58391	Kcnn3	Small conductance calcium-activated potassium channel protein 3	KCNN3_MOUSE	inf	5.26508e-05	0.000377049	1.61715e-05
Q8K400	Stxbp5	Syntaxin-binding protein 5	STXB5_MOUSE	inf	5.28583e-05	0.000377049	0.000137175
P46664	Adss2	Adenylosuccinate synthetase isozyme 2	PURA2_MOUSE	inf	5.30032e-05	0.000377049	1.70283e-05
Q91VR7	Map1lc3a	Microtubule-associated proteins 1A/1B light chain 3A	MLP3A_MOUSE	inf	5.30611e-05	0.000377049	2.58702e-05
Q7TSS2;Q7TSS2-2	Ube2q1	Ubiquitin-conjugating enzyme E2 Q1;Isoform 2 of Ubiquitin-conjugating enzyme E2 Q1	UB2Q1_MOUSE	inf	5.32958e-05	0.000377741	4.73896e-05
Q9Z1K5	Arih1	E3 ubiquitin-protein ligase ARIH1	ARI1_MOUSE	inf	5.3644e-05	0.000379231	1.96157e-05
O08582	Gtpbp1	GTP-binding protein 1	GTPB1_MOUSE	inf	5.4182e-05	0.000381588	8.4039e-06
P32921;P32921-2	Wars1	Tryptophan--tRNA ligase, cytoplasmic;Isoform 2 of Tryptophan--tRNA ligase, cytoplasmic	SYWC_MOUSE	inf	5.44101e-05	0.000381588	2.34267e-05
P54830;P54830-2	Ptpn5	Tyrosine-protein phosphatase non-receptor type 5;Isoform STEP46 of Tyrosine-protein phosphatase non-receptor type 5	PTN5_MOUSE	inf	5.45451e-05	0.000381588	2.13926e-05
Q8K4G5-2;Q8K4G5-4	Ablim1	Isoform 2 of Actin-binding LIM protein 1;Isoform 4 of Actin-binding LIM protein 1	ABLM1_MOUSE	inf	5.4654e-05	0.000381588	2.90612e-05
O88811	Stam2	Signal transducing adapter molecule 2	STAM2_MOUSE	inf	5.46712e-05	0.000381588	1.34206e-05
Q8BGG7	Ubash3b	Ubiquitin-associated and SH3 domain-containing protein B	UBS3B_MOUSE	inf	5.4981e-05	0.000382234	7.7389e-06
O08788;O08788-2	Dctn1	Dynactin subunit 1;Isoform 2 of Dynactin subunit 1	DCTN1_MOUSE	inf	5.50417e-05	0.000382234	1.57171e-05
Q80ZI6	Lrsam1	E3 ubiquitin-protein ligase LRSAM1	LRSM1_MOUSE	inf	5.54516e-05	0.000384111	9.24903e-06
Q9D832	Dnajb4	DnaJ homolog subfamily B member 4	DNJB4_MOUSE	inf	5.64934e-05	0.000389434	2.22905e-05
Q8C1B1;Q8C1B1-2	Camsap2	Calmodulin-regulated spectrin-associated protein 2;Isoform 2 of Calmodulin-regulated spectrin-associated protein 2	CAMP2_MOUSE	inf	5.66006e-05	0.000389434	1.40125e-05
Q9Z1W9	Stk39	STE20/SPS1-related proline-alanine-rich protein kinase	STK39_MOUSE	inf	5.66449e-05	0.000389434	2.10025e-05
Q9R062	Gyg1	Glycogenin-1	GLYG_MOUSE	inf	5.75361e-05	0.000394099	4.44609e-05
Q80XI3;Q80XI3-2;Q80XI3-3;Q80XI3-4	Eif4g3	Eukaryotic translation initiation factor 4 gamma 3;Isoform 2 of Eukaryotic translation initiation factor 4 gamma 3;Isoform 3 of Eukaryotic translation initiation factor 4 gamma 3;Isoform 4 of Eukaryotic translation initiation factor 4 gamma 3	IF4G3_MOUSE	inf	5.76101e-05	0.000394099	4.88911e-05
Q3TY60-2	Fam131b	Isoform 2 of Protein FAM131B	F131B_MOUSE	inf	5.86689e-05	0.000400346	3.03454e-05
O35681	Syt3	Synaptotagmin-3	SYT3_MOUSE	inf	5.91643e-05	0.000400661	8.74624e-06
P61294	Rab6b	Ras-related protein Rab-6B	RAB6B_MOUSE	inf	5.93778e-05	0.000400661	6.03241e-05
Q8QZV4	Stk32c	Serine/threonine-protein kinase 32C	ST32C_MOUSE	inf	5.93999e-05	0.000400661	6.0707e-06
Q6ZQ18	Efr3b	Protein EFR3 homolog B	EFR3B_MOUSE	inf	5.94776e-05	0.000400661	2.51158e-05
Q7TPM6	Fsd1	Fibronectin type III and SPRY domain-containing protein 1	FSD1_MOUSE	inf	5.95807e-05	0.000400661	1.17671e-05
Q91V36	Nrbp2	Nuclear receptor-binding protein 2	NRBP2_MOUSE	inf	5.95893e-05	0.000400661	4.27401e-06
Q8BFQ8	Gatd1	Glutamine amidotransferase-like class 1 domain-containing protein 1	GALD1_MOUSE	inf	6.0212e-05	0.000402148	1.90247e-05
O88447	Klc1	Kinesin light chain 1	KLC1_MOUSE	inf	6.03034e-05	0.000402148	3.60142e-05
O70152	Dpm1	Dolichol-phosphate mannosyltransferase subunit 1	DPM1_MOUSE	inf	6.0356e-05	0.000402148	2.96982e-05
Q80U87	Usp8	Ubiquitin carboxyl-terminal hydrolase 8	UBP8_MOUSE	inf	6.03954e-05	0.000402148	1.82374e-05
Q9DAK9	Phpt1	14 kDa phosphohistidine phosphatase	PHP14_MOUSE	inf	6.07306e-05	0.000402834	7.24101e-05
Q811P8	Arhgap32	Rho GTPase-activating protein 32	RHG32_MOUSE	inf	6.07943e-05	0.000402834	1.82286e-05
Q99MK8	Grk2	Beta-adrenergic receptor kinase 1	ARBK1_MOUSE	inf	6.14172e-05	0.000402834	3.75712e-05
Q91YL3	Uckl1	Uridine-cytidine kinase-like 1	UCKL1_MOUSE	inf	6.15323e-05	0.000402834	1.71671e-05
Q9D5V6	Syap1	Synapse-associated protein 1	SYAP1_MOUSE	inf	6.15621e-05	0.000402834	1.90034e-05
Q69ZF3	Gba2	Non-lysosomal glucosylceramidase	GBA2_MOUSE	inf	6.15886e-05	0.000402834	1.59802e-05
P24668	M6pr	Cation-dependent mannose-6-phosphate receptor	MPRD_MOUSE	inf	6.16353e-05	0.000402834	6.18234e-05
Q9D061	Acbd6	Acyl-CoA-binding domain-containing protein 6	ACBD6_MOUSE	inf	6.17358e-05	0.000402834	1.06865e-05
Q8R5C5	Actr1b	Beta-centractin	ACTY_MOUSE	inf	6.18168e-05	0.000402834	0.000177918
Q9R1V6-11;Q9R1V6-14	Adam22	Isoform 9 of Disintegrin and metalloproteinase domain-containing protein 22;Isoform 12 of Disintegrin and metalloproteinase domain-containing protein 22	ADA22_MOUSE	inf	6.22824e-05	0.000404057	3.0739e-05
Q52KF3;Q52KF3-2;Q52KF3-3	Spire1	Protein spire homolog 1;Isoform 2 of Protein spire homolog 1;Isoform 3 of Protein spire homolog 1	SPIR1_MOUSE	inf	6.25939e-05	0.000404057	1.35437e-05
Q68ED7	Crtc1	CREB-regulated transcription coactivator 1	CRTC1_MOUSE	inf	6.26587e-05	0.000404057	1.66034e-05
Q80TN4	Dnajc16	DnaJ homolog subfamily C member 16	DJC16_MOUSE	inf	6.27374e-05	0.000404057	1.14885e-05
Q62470;Q62470-2;Q62470-3	Itga3	Integrin alpha-3;Isoform 2 of Integrin alpha-3;Isoform 3 of Integrin alpha-3	ITA3_MOUSE	inf	6.2739e-05	0.000404057	4.6385e-05
Q7TPB0	Plppr3	Phospholipid phosphatase-related protein type 3	PLPR3_MOUSE	inf	6.30696e-05	0.000405092	1.30826e-05
Q9D0I9	Rars1	Arginine--tRNA ligase, cytoplasmic	SYRC_MOUSE	inf	6.32683e-05	0.000405092	2.16343e-05
Q01097	Grin2b	Glutamate receptor ionotropic, NMDA 2B	NMDE2_MOUSE	inf	6.33416e-05	0.000405092	3.94057e-05
Q9ESN9;Q9ESN9-2;Q9ESN9-3;Q9ESN9-4;Q9ESN9-6	Mapk8ip3	C-Jun-amino-terminal kinase-interacting protein 3;Isoform 1a of C-Jun-amino-terminal kinase-interacting protein 3;Isoform 1b of C-Jun-amino-terminal kinase-interacting protein 3;Isoform 1d of C-Jun-amino-terminal kinase-interacting protein 3;Isoform 1e of C-Jun-amino-terminal kinase-interacting protein 3	JIP3_MOUSE	inf	6.39632e-05	0.000407183	8.63592e-06
Q923T9;Q923T9-2;Q923T9-3	Camk2g	Calcium/calmodulin-dependent protein kinase type II subunit gamma;Isoform 2 of Calcium/calmodulin-dependent protein kinase type II subunit gamma;Isoform 3 of Calcium/calmodulin-dependent protein kinase type II subunit gamma	KCC2G_MOUSE	inf	6.4107e-05	0.000407183	1.90143e-05
P98191	Cds1	Phosphatidate cytidylyltransferase 1	CDS1_MOUSE	inf	6.41128e-05	0.000407183	1.33021e-05
Q8K4Q0	Rptor	Regulatory-associated protein of mTOR	RPTOR_MOUSE	inf	6.47452e-05	0.000409281	2.67485e-05
Q8BTG3	Tcp11l1	T-complex protein 11-like protein 1	T11L1_MOUSE	inf	6.48613e-05	0.000409281	1.88512e-05
Q6PHU5;Q6PHU5-2	Sort1	Sortilin;Isoform 2 of Sortilin	SORT_MOUSE	inf	6.48896e-05	0.000409281	5.82737e-05
Q8R574	Prpsap2	Phosphoribosyl pyrophosphate synthase-associated protein 2	KPRB_MOUSE	inf	6.61486e-05	0.000416267	3.24752e-05
Q8C878	Uba3	NEDD8-activating enzyme E1 catalytic subunit	UBA3_MOUSE	inf	6.67151e-05	0.000418873	1.56101e-05
Q61923	Kcna6	Potassium voltage-gated channel subfamily A member 6	KCNA6_MOUSE	inf	6.69101e-05	0.000419141	1.05681e-05
Q8VDQ1;Q8VDQ1-2	Ptgr2	Prostaglandin reductase 2;Isoform 2 of Prostaglandin reductase 2	PTGR2_MOUSE	inf	6.86141e-05	0.000428838	3.00679e-05
Q61644	Pacsin1	Protein kinase C and casein kinase substrate in neurons protein 1	PACN1_MOUSE	3.80853	6.88874e-05	0.00042957	0.000189574
O70507	Hcn4	Potassium/sodium hyperpolarization-activated cyclic nucleotide-gated channel 4	HCN4_MOUSE	inf	6.9279e-05	0.000431035	2.09149e-05
Q8BM65;Q8BM65-2;Q8BM65-3;Q8BM65-4;Q8BM65-5	Nyap2	Neuronal tyrosine-phosphorylated phosphoinositide-3-kinase adapter 2;Isoform 2 of Neuronal tyrosine-phosphorylated phosphoinositide-3-kinase adapter 2;Isoform 3 of Neuronal tyrosine-phosphorylated phosphoinositide-3-kinase adapter 2;Isoform 4 of Neuronal tyrosine-phosphorylated phosphoinositide-3-kinase adapter 2;Isoform 5 of Neuronal tyrosine-phosphorylated phosphoinositide-3-kinase adapter 2	NYAP2_MOUSE	inf	6.96897e-05	0.00043154	8.32385e-06
P70392	Rasgrf2	Ras-specific guanine nucleotide-releasing factor 2	RGRF2_MOUSE	inf	6.97641e-05	0.00043154	1.84507e-05
Q922H1;Q922H1-2	Prmt3	Protein arginine N-methyltransferase 3;Isoform 2 of Protein arginine N-methyltransferase 3	ANM3_MOUSE	inf	6.98309e-05	0.00043154	1.59817e-05
P48453;P48453-2	Ppp3cb	Serine/threonine-protein phosphatase 2B catalytic subunit beta isoform;Isoform 1 of Serine/threonine-protein phosphatase 2B catalytic subunit beta isoform	PP2BB_MOUSE	inf	7.0442e-05	0.00043434	3.1878e-05
Q3UHI4	Tmed8	Protein TMED8	TMED8_MOUSE	inf	7.21561e-05	0.000443913	1.18207e-05
P62500;P62500-3	Tsc22d1	TSC22 domain family protein 1;Isoform 3 of TSC22 domain family protein 1	T22D1_MOUSE	inf	7.23272e-05	0.000443973	3.23553e-05
Q9ER35	Fn3k	Fructosamine-3-kinase	FN3K_MOUSE	inf	7.31802e-05	0.000448209	2.12147e-05
O35382	Exoc4	Exocyst complex component 4	EXOC4_MOUSE	inf	7.47568e-05	0.000456835	2.86613e-05
Q9D0A3	Arpin	Arpin	ARPIN_MOUSE	inf	7.49209e-05	0.000456835	2.41607e-05
Q8BHH2	Rab9b	Ras-related protein Rab-9B	RAB9B_MOUSE	inf	7.52573e-05	0.000457871	1.94252e-05
P05213	Tuba1b	Tubulin alpha-1B chain	TBA1B_MOUSE	5.51338	7.54393e-05	0.000457965	0.0107767
Q6PHZ8;Q6PHZ8-2;Q6PHZ8-3;Q6PHZ8-4	Kcnip4	Kv channel-interacting protein 4;Isoform 2 of Kv channel-interacting protein 4;Isoform 3 of Kv channel-interacting protein 4;Isoform 4 of Kv channel-interacting protein 4	KCIP4_MOUSE	inf	7.56785e-05	0.000458405	6.89359e-05
Q62426	Cstb	Cystatin-B	CYTB_MOUSE	inf	7.6599e-05	0.000462961	2.54476e-05
Q9CQI3	Gmfb	Glia maturation factor beta	GMFB_MOUSE	inf	7.69924e-05	0.000464318	2.00187e-05
O54865	Gucy1b1	Guanylate cyclase soluble subunit beta-1	GCYB1_MOUSE	inf	7.72652e-05	0.000464944	3.67452e-05
Q9ERB0	Snap29	Synaptosomal-associated protein 29	SNP29_MOUSE	inf	7.76657e-05	0.000466334	1.1989e-05
Q8K0G5	Eipr1	EARP and GARP complex-interacting protein 1	EIPR1_MOUSE	inf	7.85479e-05	0.000469774	2.98952e-05
Q62432;Q62432-2	Smad2	Mothers against decapentaplegic homolog 2;Isoform Short of Mothers against decapentaplegic homolog 2	SMAD2_MOUSE	inf	7.86988e-05	0.000469774	1.96707e-05
O70589	Cask	Peripheral plasma membrane protein CASK	CSKP_MOUSE	inf	7.87513e-05	0.000469774	3.00579e-05
Q8CH77;Q8CH77-2	Nav1	Neuron navigator 1;Isoform 2 of Neuron navigator 1	NAV1_MOUSE	inf	7.98826e-05	0.000475017	7.61112e-06
P35293	Rab18	Ras-related protein Rab-18	RAB18_MOUSE	inf	7.99756e-05	0.000475017	3.20599e-05
Q60737	Csnk2a1	Casein kinase II subunit alpha	CSK21_MOUSE	inf	8.01721e-05	0.000475158	4.95649e-05
P10637	Mapt	Microtubule-associated protein tau	TAU_MOUSE	4.64127	8.03573e-05	0.000475232	0.00083273
Q8VD33	Sgtb	Small glutamine-rich tetratricopeptide repeat-containing protein beta	SGTB_MOUSE	inf	8.05769e-05	0.000475507	2.97663e-05
Q8BQP9	Rgs7bp	Regulator of G-protein signaling 7-binding protein	R7BP_MOUSE	inf	8.10144e-05	0.000477065	4.72327e-06
O08579	Emd	Emerin	EMD_MOUSE	inf	8.17614e-05	0.000478459	9.20707e-05
Q8BH44	Coro2b	Coronin-2B	COR2B_MOUSE	inf	8.1795e-05	0.000478459	2.15996e-05
Q9D7V2	Lysmd2	LysM and putative peptidoglycan-binding domain-containing protein 2	LYSM2_MOUSE	inf	8.18266e-05	0.000478459	1.76139e-05
Q91X97	Ncald	Neurocalcin-delta	NCALD_MOUSE	inf	8.1947e-05	0.000478459	3.48961e-05
Q9Z1D1	Eif3g	Eukaryotic translation initiation factor 3 subunit G	EIF3G_MOUSE	inf	8.21499e-05	0.000478628	3.24641e-05
Q9D7X3	Dusp3	Dual specificity protein phosphatase 3	DUS3_MOUSE	inf	8.38824e-05	0.000485946	8.49487e-06
Q8VE11;Q8VE11-2	Mtmr6	Myotubularin-related protein 6;Isoform 2 of Myotubularin-related protein 6	MTMR6_MOUSE	inf	8.39639e-05	0.000485946	1.18082e-05
P47802	Mtx1	Metaxin-1	MTX1_MOUSE	inf	8.39788e-05	0.000485946	1.51949e-05
P84075	Hpca	Neuron-specific calcium-binding protein hippocalcin	HPCA_MOUSE	3.91442	8.41128e-05	0.000485946	0.00014869
Q9DCL8	Ppp1r2	Protein phosphatase inhibitor 2	IPP2_MOUSE	inf	8.42951e-05	0.000485978	7.418e-05
Q61701;Q61701-10;Q61701-11;Q61701-4;Q61701-5;Q61701-7;Q61701-9	Elavl4	ELAV-like protein 4;Isoform 9 of ELAV-like protein 4;Isoform 10 of ELAV-like protein 4;Isoform 3 of ELAV-like protein 4;Isoform 4 of ELAV-like protein 4;Isoform 6 of ELAV-like protein 4;Isoform 8 of ELAV-like protein 4	ELAV4_MOUSE	inf	8.50829e-05	0.000489494	6.15414e-05
P67871	Csnk2b	Casein kinase II subunit beta	CSK2B_MOUSE	inf	8.55873e-05	0.000491368	4.15021e-05
Q8BGZ1	Hpcal4	Hippocalcin-like protein 4	HPCL4_MOUSE	4.33176	8.58111e-05	0.000491626	0.00126796
Q8C166	Cpne1	Copine-1	CPNE1_MOUSE	inf	8.74905e-05	0.000500206	1.84612e-05
Q8K221	Arfip2	Arfaptin-2	ARFP2_MOUSE	inf	8.82884e-05	0.00050372	2.08388e-05
P48542;P48542-2	Kcnj6	G protein-activated inward rectifier potassium channel 2;Isoform GIRK2-1 of G protein-activated inward rectifier potassium channel 2	KCNJ6_MOUSE	inf	9.0171e-05	0.000513396	2.33326e-05
O09131	Gsto1	Glutathione S-transferase omega-1	GSTO1_MOUSE	inf	9.04833e-05	0.000513882	1.72112e-05
Q8C080	Snx16	Sorting nexin-16	SNX16_MOUSE	inf	9.06301e-05	0.000513882	3.81584e-05
Q9JLQ0	Cd2ap	CD2-associated protein	CD2AP_MOUSE	inf	9.11454e-05	0.000515034	1.04969e-05
P70318	Tial1	Nucleolysin TIAR	TIAR_MOUSE	inf	9.14079e-05	0.000515034	8.23519e-05
Q8C0T5;Q8C0T5-2	Sipa1l1	Signal-induced proliferation-associated 1-like protein 1;Isoform 2 of Signal-induced proliferation-associated 1-like protein 1	SI1L1_MOUSE	inf	9.15338e-05	0.000515034	1.43379e-05
Q61189	Clns1a	Methylosome subunit pICln	ICLN_MOUSE	inf	9.15824e-05	0.000515034	3.77033e-05
Q8BR63	Fam177a1	Protein FAM177A1	F177A_MOUSE	inf	9.19375e-05	0.000515562	2.04584e-05
Q8R191	Syngr3	Synaptogyrin-3	SNG3_MOUSE	3.26215	9.20512e-05	0.000515562	0.000249224
P62761	Vsnl1	Visinin-like protein 1	VISL1_MOUSE	4.92649	9.23214e-05	0.000515848	0.00095431
Q5EG47	Prkaa1	5'-AMP-activated protein kinase catalytic subunit alpha-1	AAPK1_MOUSE	inf	9.25235e-05	0.000515848	1.48691e-05
Q99KC8	Vwa5a	von Willebrand factor A domain-containing protein 5A	VMA5A_MOUSE	inf	9.26651e-05	0.000515848	4.47941e-05
P26638	Sars1	Serine--tRNA ligase, cytoplasmic	SYSC_MOUSE	3.15642	9.36167e-05	0.000520093	8.7942e-05
O88587;O88587-2	Comt	Catechol O-methyltransferase;Isoform Soluble of Catechol O-methyltransferase	COMT_MOUSE	inf	9.4547e-05	0.000524202	1.49938e-05
Q8BYK6;Q8BYK6-3	Ythdf3	YTH domain-containing family protein 3;Isoform 3 of YTH domain-containing family protein 3	YTHD3_MOUSE	inf	9.53959e-05	0.000527304	1.02504e-05
P55821	Stmn2	Stathmin-2	STMN2_MOUSE	inf	9.54899e-05	0.000527304	1.87122e-05
Q9CR51	Atp6v1g1	V-type proton ATPase subunit G 1	VATG1_MOUSE	inf	9.59254e-05	0.000528647	1.0659e-05
Q04447	Ckb	Creatine kinase B-type	KCRB_MOUSE	4.43737	9.62442e-05	0.000529343	0.00232058
P53996;P53996-2;P53996-3	Cnbp	Cellular nucleic acid-binding protein;Isoform 2 of Cellular nucleic acid-binding protein;Isoform 3 of Cellular nucleic acid-binding protein	CNBP_MOUSE	inf	9.89343e-05	0.000543053	2.49536e-05
Q9JKS5	Habp4	Intracellular hyaluronan-binding protein 4	HABP4_MOUSE	inf	9.91624e-05	0.000543221	7.4156e-05
Q8C7R4	Uba6	Ubiquitin-like modifier-activating enzyme 6	UBA6_MOUSE	inf	9.98809e-05	0.000546069	2.08704e-05
O88958	Gnpda1	Glucosamine-6-phosphate isomerase 1	GNPI1_MOUSE	inf	0.000100232	0.000546823	4.11439e-05
Q9JIA7	Sphk2	Sphingosine kinase 2	SPHK2_MOUSE	inf	0.000100441	0.000546823	1.70132e-05
Q9WVG6;Q9WVG6-2	Carm1	Histone-arginine methyltransferase CARM1;Isoform 2 of Histone-arginine methyltransferase CARM1	CARM1_MOUSE	inf	0.000100615	0.000546823	3.12376e-05
Q8VEH5	Epm2aip1	EPM2A-interacting protein 1	EPMIP_MOUSE	inf	0.000100846	0.000546995	1.66373e-05
O70492	Snx3	Sorting nexin-3	SNX3_MOUSE	inf	0.00010137	0.000548067	6.85543e-05
Q9Z0P4-2	Palm	Isoform 2 of Paralemmin-1	PALM_MOUSE	inf	0.000101444	0.000548067	5.32258e-05
Q149F3	Gspt2	Eukaryotic peptide chain release factor GTP-binding subunit ERF3B	ERF3B_MOUSE	inf	0.000101642	0.000548067	1.56484e-05
P97372	Psme2	Proteasome activator complex subunit 2	PSME2_MOUSE	inf	0.000102199	0.000549994	3.76529e-05
Q9ERG2	Strn3	Striatin-3	STRN3_MOUSE	inf	0.000102527	0.00055068	2.40505e-05
Q9QYK7	Rnf11	RING finger protein 11	RNF11_MOUSE	inf	0.000102919	0.000551712	3.2066e-05
Q08509	Eps8	Epidermal growth factor receptor kinase substrate 8	EPS8_MOUSE	inf	0.00010355	0.00055294	3.78811e-05
P59326	Ythdf1	YTH domain-containing family protein 1	YTHD1_MOUSE	inf	0.000103551	0.00055294	2.14042e-05
Q9CYZ2	Tpd52l2	Tumor protein D54	TPD54_MOUSE	inf	0.000103836	0.000553387	4.92956e-05
Q7TT37	Elp1	Elongator complex protein 1	ELP1_MOUSE	inf	0.000104328	0.000553393	2.61802e-05
O88319	Ntsr1	Neurotensin receptor type 1	NTR1_MOUSE	inf	0.000104506	0.000553393	3.66232e-05
P70336;P70336-2	Rock2	Rho-associated protein kinase 2;Isoform 2 of Rho-associated protein kinase 2	ROCK2_MOUSE	inf	0.00010456	0.000553393	1.93993e-05
Q8BNW9	Kbtbd11	Kelch repeat and BTB domain-containing protein 11	KBTBB_MOUSE	inf	0.000104763	0.000553393	1.93642e-05
Q6PCP5	Mff	Mitochondrial fission factor	MFF_MOUSE	inf	0.000104843	0.000553393	2.76749e-05
P62812	Gabra1	Gamma-aminobutyric acid receptor subunit alpha-1	GBRA1_MOUSE	inf	0.000105409	0.000554276	0.000218969
P49446;P49446-2;P49446-3	Ptpre	Receptor-type tyrosine-protein phosphatase epsilon;Isoform 2 of Receptor-type tyrosine-protein phosphatase epsilon;Isoform 3 of Receptor-type tyrosine-protein phosphatase epsilon	PTPRE_MOUSE	inf	0.000105413	0.000554276	2.08251e-05
Q8R1G2	Cmbl	Carboxymethylenebutenolidase homolog	CMBL_MOUSE	inf	0.000105998	0.000556286	1.25748e-05
P70333	Hnrnph2	Heterogeneous nuclear ribonucleoprotein H2	HNRH2_MOUSE	inf	0.000106219	0.000556387	4.33416e-05
Q9R022	Dnajc12	DnaJ homolog subfamily C member 12	DJC12_MOUSE	inf	0.000108392	0.000564107	2.67797e-05
Q9DCC4	Pycr3	Pyrroline-5-carboxylate reductase 3	P5CR3_MOUSE	inf	0.00010848	0.000564107	2.62308e-05
Q3U1J4	Ddb1	DNA damage-binding protein 1	DDB1_MOUSE	3.21585	0.000108484	0.000564107	5.23352e-05
Q4ACU6;Q4ACU6-11;Q4ACU6-3;Q4ACU6-7	Shank3	SH3 and multiple ankyrin repeat domains protein 3;Isoform 3 of SH3 and multiple ankyrin repeat domains protein 3;Isoform 4 of SH3 and multiple ankyrin repeat domains protein 3;Isoform 6 of SH3 and multiple ankyrin repeat domains protein 3	SHAN3_MOUSE	inf	0.000108514	0.000564107	2.96388e-05
Q61545	Ewsr1	RNA-binding protein EWS	EWS_MOUSE	inf	0.00010878	0.000564424	9.30372e-05
Q80XK6	Atg2b	Autophagy-related protein 2 homolog B	ATG2B_MOUSE	inf	0.000109565	0.000567426	1.91657e-05
Q920Q6;Q920Q6-2;Q920Q6-3	Msi2	RNA-binding protein Musashi homolog 2;Isoform 2 of RNA-binding protein Musashi homolog 2;Isoform 3 of RNA-binding protein Musashi homolog 2	MSI2H_MOUSE	inf	0.000110127	0.000569266	5.81165e-05
Q9CQV8;Q9CQV8-2	Ywhab	14-3-3 protein beta/alpha;Isoform Short of 14-3-3 protein beta/alpha	1433B_MOUSE	5.06547	0.000111578	0.000575685	0.000523532
Q8CJ19	Mical3	[F-actin]-monooxygenase MICAL3	MICA3_MOUSE	inf	0.00011224	0.000578013	9.56899e-06
Q91W89	Man2c1	Alpha-mannosidase 2C1	MA2C1_MOUSE	inf	0.000112882	0.000580237	1.48561e-05
O35454	Clcn6	Chloride transport protein 6	CLCN6_MOUSE	inf	0.000114294	0.000586398	7.18539e-05
Q4V9Z5-2;Q4V9Z5-3	Sez6l2	Isoform 2 of Seizure 6-like protein 2;Isoform 3 of Seizure 6-like protein 2	SE6L2_MOUSE	inf	0.000115466	0.000591309	0.000149128
Q8VDN4	Ccdc92	Coiled-coil domain-containing protein 92	CCD92_MOUSE	inf	0.000115902	0.000591443	2.07538e-05
Q9JIS5	Sv2a	Synaptic vesicle glycoprotein 2A	SV2A_MOUSE	2.72675	0.000115923	0.000591443	8.00788e-05
Q9QXL2-2	Kif21a	Isoform 2 of Kinesin-like protein KIF21A	KI21A_MOUSE	inf	0.000117092	0.000596302	6.84249e-05
Q80TE7	Lrrc7	Leucine-rich repeat-containing protein 7	LRRC7_MOUSE	inf	0.000117779	0.000598693	2.20999e-05
Q9Z2C4	Mtmr1	Myotubularin-related protein 1	MTMR1_MOUSE	inf	0.000118148	0.000599459	1.2048e-05
Q91YL2	Rnf126	E3 ubiquitin-protein ligase RNF126	RN126_MOUSE	inf	0.000119109	0.000601523	1.72695e-05
Q62351	Tfrc	Transferrin receptor protein 1	TFR1_MOUSE	inf	0.000119227	0.000601523	1.86914e-05
P98200	Atp8a2	Phospholipid-transporting ATPase IB	AT8A2_MOUSE	inf	0.000119428	0.000601523	1.35917e-05
Q9D074;Q9D074-2;Q9D074-3;Q9D074-4;Q9D074-5	Mgrn1	E3 ubiquitin-protein ligase MGRN1;Isoform 2 of E3 ubiquitin-protein ligase MGRN1;Isoform 3 of E3 ubiquitin-protein ligase MGRN1;Isoform 4 of E3 ubiquitin-protein ligase MGRN1;Isoform 5 of E3 ubiquitin-protein ligase MGRN1	MGRN1_MOUSE	inf	0.00011943	0.000601523	2.73517e-05
Q8CBC4	Cnst	Consortin	CNST_MOUSE	inf	0.000120273	0.000604662	2.19991e-05
O35344	Kpna3	Importin subunit alpha-4	IMA4_MOUSE	8.20055	0.000120872	0.000606564	5.79207e-05
Q8CFI0;Q8CFI0-2;Q8CFI0-3	Nedd4l	E3 ubiquitin-protein ligase NEDD4-like;Isoform 2 of E3 ubiquitin-protein ligase NEDD4-like;Isoform 3 of E3 ubiquitin-protein ligase NEDD4-like	NED4L_MOUSE	inf	0.000121319	0.000607698	9.2697e-06
P35700	Prdx1	Peroxiredoxin-1	PRDX1_MOUSE	2.31103	0.000121866	0.000609331	0.00028187
Q3UH66-3;Q3UH66-4;Q3UH66-5;Q3UH66-6;Q3UH66-7	Wnk2	Isoform 3 of Serine/threonine-protein kinase WNK2;Isoform 4 of Serine/threonine-protein kinase WNK2;Isoform 5 of Serine/threonine-protein kinase WNK2;Isoform 6 of Serine/threonine-protein kinase WNK2;Isoform 7 of Serine/threonine-protein kinase WNK2	WNK2_MOUSE	inf	0.00012242	0.000610988	2.19471e-05
Q6P6N5	Spred3	Sprouty-related, EVH1 domain-containing protein 3	SPRE3_MOUSE	inf	0.000125038	0.0006226	5.77936e-06
Q8K0C9	Gmds	GDP-mannose 4,6 dehydratase	GMDS_MOUSE	inf	0.000125199	0.0006226	2.39961e-05
A6H5Z3	Exoc6b	Exocyst complex component 6B	EXC6B_MOUSE	inf	0.000126126	0.000625329	1.68781e-05
Q8BH93	Mapk1ip1l	MAPK-interacting and spindle-stabilizing protein-like	MISSL_MOUSE	inf	0.000126203	0.000625329	3.2011e-05
Q9DB73;Q9DB73-2	Cyb5r1	NADH-cytochrome b5 reductase 1;Isoform 2 of NADH-cytochrome b5 reductase 1	NB5R1_MOUSE	inf	0.00012847	0.000635416	3.61679e-05
Q8VBY2	Camkk1	Calcium/calmodulin-dependent protein kinase kinase 1	KKCC1_MOUSE	inf	0.000128954	0.000636669	1.46145e-05
Q8K3E5	Ahi1	Jouberin	AHI1_MOUSE	inf	0.000130173	0.000641532	3.45571e-05
Q8CGF6	Wdr47	WD repeat-containing protein 47	WDR47_MOUSE	inf	0.00013143	0.000646569	2.65063e-05
Q91VM9;Q91VM9-2	Ppa2	Inorganic pyrophosphatase 2, mitochondrial;Isoform 2 of Inorganic pyrophosphatase 2, mitochondrial	IPYR2_MOUSE	inf	0.000132898	0.000652626	1.3876e-05
Q9JII5;Q9JII5-2	Dazap1	DAZ-associated protein 1;Isoform 2 of DAZ-associated protein 1	DAZP1_MOUSE	inf	0.000133851	0.000655191	4.51056e-05
Q9WU78	Pdcd6ip	Programmed cell death 6-interacting protein	PDC6I_MOUSE	3.43347	0.000133897	0.000655191	9.48029e-05
Q6PAR5;Q6PAR5-2;Q6PAR5-4;Q6PAR5-6	Gapvd1	GTPase-activating protein and VPS9 domain-containing protein 1;Isoform 2 of GTPase-activating protein and VPS9 domain-containing protein 1;Isoform 4 of GTPase-activating protein and VPS9 domain-containing protein 1;Isoform 6 of GTPase-activating protein and VPS9 domain-containing protein 1	GAPD1_MOUSE	inf	0.000134509	0.000656467	1.63898e-05
P61082	Ube2m	NEDD8-conjugating enzyme Ubc12	UBC12_MOUSE	inf	0.000134865	0.000656467	3.50523e-05
O35405	Pld3	5'-3' exonuclease PLD3	PLD3_MOUSE	inf	0.000135038	0.000656467	1.73736e-05
O88441	Mtx2	Metaxin-2	MTX2_MOUSE	inf	0.000135113	0.000656467	3.4449e-05
Q01853	Vcp	Transitional endoplasmic reticulum ATPase	TERA_MOUSE	6.39153	0.000135432	0.000656858	0.000980056
P14685	Psmd3	26S proteasome non-ATPase regulatory subunit 3	PSMD3_MOUSE	inf	0.000136463	0.000660691	1.78098e-05
Q3TIV5;Q3TIV5-2	Zc3h15	Zinc finger CCCH domain-containing protein 15;Isoform 2 of Zinc finger CCCH domain-containing protein 15	ZC3HF_MOUSE	inf	0.000138292	0.000668369	1.18152e-05
P60840;P60840-2	Ensa	Alpha-endosulfine;Isoform 2 of Alpha-endosulfine	ENSA_MOUSE	inf	0.000140101	0.000675924	8.07506e-05
Q9JK48;Q9JK48-2	Sh3glb1	Endophilin-B1;Isoform 2 of Endophilin-B1	SHLB1_MOUSE	inf	0.000140797	0.000677632	1.80271e-05
Q80TQ2;Q80TQ2-2	Cyld	Ubiquitin carboxyl-terminal hydrolase CYLD;Isoform 1 of Ubiquitin carboxyl-terminal hydrolase CYLD	CYLD_MOUSE	inf	0.000140947	0.000677632	6.05104e-06
P60469	Ppfia3	Liprin-alpha-3	LIPA3_MOUSE	inf	0.000141695	0.000680039	1.17911e-05
Q99L04	Dhrs1	Dehydrogenase/reductase SDR family member 1	DHRS1_MOUSE	inf	0.00014205	0.000680552	9.42672e-06
Q9QXV0	Pcsk1n	ProSAAS	PCS1N_MOUSE	inf	0.000146327	0.000699826	1.38482e-05
P63028	Tpt1	Translationally-controlled tumor protein	TCTP_MOUSE	inf	0.000147301	0.000703262	5.56082e-05
P54285	Cacnb3	Voltage-dependent L-type calcium channel subunit beta-3	CACB3_MOUSE	inf	0.000147615	0.000703539	1.22792e-05
Q62048	Pea15	Astrocytic phosphoprotein PEA-15	PEA15_MOUSE	inf	0.000148566	0.000706397	4.45741e-05
E9Q3L2	Pi4ka	Phosphatidylinositol 4-kinase alpha	PI4KA_MOUSE	3.75358	0.000149315	0.000706397	8.42087e-05
Q8R010	Aimp2	Aminoacyl tRNA synthase complex-interacting multifunctional protein 2	AIMP2_MOUSE	inf	0.000149375	0.000706397	2.17271e-05
Q8BFY9;Q8BFY9-2	Tnpo1	Transportin-1;Isoform 2 of Transportin-1	TNPO1_MOUSE	inf	0.000149614	0.000706397	2.57406e-05
Q9CRD0;Q9CRD0-2;Q9CRD0-3	Ociad1	OCIA domain-containing protein 1;Isoform 2 of OCIA domain-containing protein 1;Isoform 3 of OCIA domain-containing protein 1	OCAD1_MOUSE	inf	0.000149742	0.000706397	6.59091e-05
Q91ZZ3	Sncb	Beta-synuclein	SYUB_MOUSE	3.54947	0.000149953	0.000706397	0.00137922
Q80U28;Q80U28-15	Madd	MAP kinase-activating death domain protein;Isoform 15 of MAP kinase-activating death domain protein	MADD_MOUSE	inf	0.000150044	0.000706397	2.19927e-05
Q91Z69	Srgap1	SLIT-ROBO Rho GTPase-activating protein 1	SRGP1_MOUSE	inf	0.00015027	0.000706397	1.34595e-05
Q6IRU5	Cltb	Clathrin light chain B	CLCB_MOUSE	inf	0.000150672	0.000707076	0.000143336
Q9CX56	Psmd8	26S proteasome non-ATPase regulatory subunit 8	PSMD8_MOUSE	inf	0.000153583	0.000718884	3.40045e-05
Q8BU31	Rap2c	Ras-related protein Rap-2c	RAP2C_MOUSE	inf	0.000153711	0.000718884	3.28815e-05
O35526	Stx1a	Syntaxin-1A	STX1A_MOUSE	inf	0.000154239	0.000720132	1.37554e-05
Q8K2L8	Trappc12	Trafficking protein particle complex subunit 12	TPC12_MOUSE	inf	0.000154756	0.00072132	5.14866e-05
Q80W04	Tmcc2	Transmembrane and coiled-coil domains protein 2	TMCC2_MOUSE	inf	0.00015706	0.000730823	4.71313e-06
O88384	Vti1b	Vesicle transport through interaction with t-SNAREs homolog 1B	VTI1B_MOUSE	inf	0.000158261	0.000735079	4.33101e-05
Q7TSC1	Prrc2a	Protein PRRC2A	PRC2A_MOUSE	inf	0.000158762	0.000735079	2.8509e-05
P61087	Ube2k	Ubiquitin-conjugating enzyme E2 K	UBE2K_MOUSE	inf	0.000158777	0.000735079	2.0156e-05
P70372	Elavl1	ELAV-like protein 1	ELAV1_MOUSE	inf	0.000160512	0.000741864	3.80955e-05
Q8BHL8	Psmf1	Proteasome inhibitor PI31 subunit	PSMF1_MOUSE	inf	0.000162489	0.000749481	3.12101e-05
Q9D7A8	Armc1	Armadillo repeat-containing protein 1	ARMC1_MOUSE	inf	0.000162705	0.000749481	3.4533e-05
Q99ME2	Wdr6	WD repeat-containing protein 6	WDR6_MOUSE	inf	0.000163828	0.000753389	3.33205e-05
Q03391	Grin2d	Glutamate receptor ionotropic, NMDA 2D	NMDE4_MOUSE	inf	0.000164946	0.000757266	1.0631e-05
Q9D0J8	Ptms	Parathymosin	PTMS_MOUSE	inf	0.000166454	0.000762916	3.14439e-05
Q62172	Ralbp1	RalA-binding protein 1	RBP1_MOUSE	inf	0.000167332	0.000765661	3.41237e-05
Q80TN5;Q80TN5-2	Zdhhc17	Palmitoyltransferase ZDHHC17;Isoform 2 of Palmitoyltransferase ZDHHC17	ZDH17_MOUSE	inf	0.000168227	0.000768478	1.71802e-05
A2ARP1;A2ARP1-2;A2ARP1-3;A2ARP1-7	Ppip5k1	Inositol hexakisphosphate and diphosphoinositol-pentakisphosphate kinase 1;Isoform 2 of Inositol hexakisphosphate and diphosphoinositol-pentakisphosphate kinase 1;Isoform 3 of Inositol hexakisphosphate and diphosphoinositol-pentakisphosphate kinase 1;Isoform 6 of Inositol hexakisphosphate and diphosphoinositol-pentakisphosphate kinase 1	VIP1_MOUSE	inf	0.000168782	0.000769738	1.54585e-05
Q9Z2C9	Mtmr7	Myotubularin-related protein 7	MTMR7_MOUSE	inf	0.000169669	0.000772498	1.49599e-05
Q3TYX3	Smyd5	SET and MYND domain-containing protein 5	SMYD5_MOUSE	inf	0.000170393	0.000774516	1.64987e-05
P17156	Hspa2	Heat shock-related 70 kDa protein 2	HSP72_MOUSE	inf	0.000171173	0.000776774	1.96737e-05
Q80UP3	Dgkz	Diacylglycerol kinase zeta	DGKZ_MOUSE	inf	0.000173301	0.000785135	3.85207e-05
O88983	Stx8	Syntaxin-8	STX8_MOUSE	inf	0.000174067	0.000786119	1.36301e-05
Q9D8U8	Snx5	Sorting nexin-5	SNX5_MOUSE	inf	0.00017409	0.000786119	1.03874e-05
Q9D0M1	Prpsap1	Phosphoribosyl pyrophosphate synthase-associated protein 1	KPRA_MOUSE	inf	0.000176526	0.000795813	1.04392e-05
P35585	Ap1m1	AP-1 complex subunit mu-1	AP1M1_MOUSE	inf	0.000177092	0.000796153	1.06236e-05
Q80UG2	Plxna4	Plexin-A4	PLXA4_MOUSE	inf	0.000177299	0.000796153	2.79514e-05
Q68FL4	Ahcyl2	Putative adenosylhomocysteinase 3	SAHH3_MOUSE	3.74068	0.000177589	0.000796153	0.000330435
P62259	Ywhae	14-3-3 protein epsilon	1433E_MOUSE	3.34861	0.000177759	0.000796153	0.000353865
Q9D1K7	Unknown	UPF0687 protein C20orf27 homolog	CT027_MOUSE	inf	0.000178394	0.000797697	3.03508e-05
Q6A0A9	FAM120A	Constitutive coactivator of PPAR-gamma-like protein 1	F120A_MOUSE	inf	0.000179317	0.000800501	1.64279e-05
P56212	Arpp19	cAMP-regulated phosphoprotein 19	ARP19_MOUSE	inf	0.000179603	0.000800501	2.87714e-05
Q9QZM0	Ubqln2	Ubiquilin-2	UBQL2_MOUSE	inf	0.000180186	0.000801797	4.42192e-05
Q60996;Q60996-2;Q60996-3;Q60996-4	Ppp2r5c	Serine/threonine-protein phosphatase 2A 56 kDa regulatory subunit gamma isoform;Isoform 1 of Serine/threonine-protein phosphatase 2A 56 kDa regulatory subunit gamma isoform;Isoform 3 of Serine/threonine-protein phosphatase 2A 56 kDa regulatory subunit gamma isoform;Isoform 4 of Serine/threonine-protein phosphatase 2A 56 kDa regulatory subunit gamma isoform	2A5G_MOUSE	7.40115	0.000183855	0.000816805	9.2925e-05
P61759	Vbp1	Prefoldin subunit 3	PFD3_MOUSE	inf	0.000184813	0.000819737	1.39103e-05
Q8BG92	Clvs2	Clavesin-2	CLVS2_MOUSE	inf	0.000187547	0.000830521	4.20103e-05
Q3KNM2	Marchf5	E3 ubiquitin-protein ligase MARCHF5	MARH5_MOUSE	inf	0.000188921	0.000834656	1.33895e-05
Q8BLV3;Q8BLV3-2	Slc9a7	Sodium/hydrogen exchanger 7;Isoform 2 of Sodium/hydrogen exchanger 7	SL9A7_MOUSE	inf	0.000189088	0.000834656	2.0416e-05
O09111	Ndufb11	NADH dehydrogenase [ubiquinone] 1 beta subcomplex subunit 11, mitochondrial	NDUBB_MOUSE	inf	0.000189679	0.000835924	1.51982e-05
P97772	Grm1	Metabotropic glutamate receptor 1	GRM1_MOUSE	inf	0.000191117	0.000839068	4.14854e-05
P16858	Gapdh	Glyceraldehyde-3-phosphate dehydrogenase	G3P_MOUSE	2.39593	0.000191141	0.000839068	0.00264054
Q4KMM3;Q4KMM3-2;Q4KMM3-3;Q4KMM3-4	Oxr1	Oxidation resistance protein 1;Isoform 2 of Oxidation resistance protein 1;Isoform 3 of Oxidation resistance protein 1;Isoform 4 of Oxidation resistance protein 1	OXR1_MOUSE	inf	0.000191307	0.000839068	1.63133e-05
Q8BRU6	Slc18a2	Synaptic vesicular amine transporter	VMAT2_MOUSE	inf	0.000191859	0.000840146	6.98443e-05
Q9Z0L0	Tpbg	Trophoblast glycoprotein	TPBG_MOUSE	inf	0.000192911	0.000843078	2.35313e-05
Q8R1X6;Q8R1X6-2	Spart	Spartin;Isoform 2 of Spartin	SPART_MOUSE	inf	0.000193142	0.000843078	9.4443e-06
Q924N4	Slc12a6	Solute carrier family 12 member 6	S12A6_MOUSE	inf	0.000194183	0.000844911	2.01448e-05
P35922;P35922-2;P35922-3;P35922-7;P35922-8;P35922-9	Fmr1	Synaptic functional regulator FMR1;Isoform 2 of Synaptic functional regulator FMR1;Isoform 3 of Synaptic functional regulator FMR1;Isoform 7 of Synaptic functional regulator FMR1;Isoform 8 of Synaptic functional regulator FMR1;Isoform 9 of Synaptic functional regulator FMR1	FMR1_MOUSE	inf	0.000194197	0.000844911	7.48268e-06
Q9Z0P4	Palm	Paralemmin-1	PALM_MOUSE	4.72926	0.000194689	0.000844911	0.000245545
P46414	Cdkn1b	Cyclin-dependent kinase inhibitor 1B	CDN1B_MOUSE	inf	0.000194796	0.000844911	5.70515e-06
P63080	Gabrb3	Gamma-aminobutyric acid receptor subunit beta-3	GBRB3_MOUSE	inf	0.000195277	0.000844911	5.02167e-05
P49442	Inpp1	Inositol polyphosphate 1-phosphatase	INPP_MOUSE	inf	0.000195405	0.000844911	9.83199e-06
O54916	Reps1	RalBP1-associated Eps domain-containing protein 1	REPS1_MOUSE	inf	0.000197244	0.000850418	3.07526e-05
P35438;P35438-2	Grin1	Glutamate receptor ionotropic, NMDA 1;Isoform 2 of Glutamate receptor ionotropic, NMDA 1	NMDZ1_MOUSE	inf	0.000197338	0.000850418	1.5146e-05
Q9CQS4	Slc25a46	Solute carrier family 25 member 46	S2546_MOUSE	inf	0.000197606	0.000850418	2.23351e-05
A2AJA9	Ajm1	Apical junction component 1 homolog	AJM1_MOUSE	inf	0.000198867	0.000854508	3.20656e-05
Q9DCS9	Ndufb10	NADH dehydrogenase [ubiquinone] 1 beta subcomplex subunit 10	NDUBA_MOUSE	inf	0.000199288	0.000854981	0.000100052
Q6QWF9	Camk2n1	Calcium/calmodulin-dependent protein kinase II inhibitor 1	CK2N1_MOUSE	inf	0.000202558	0.000867653	2.49842e-05
Q8BJI1	Slc6a17	Sodium-dependent neutral amino acid transporter SLC6A17	S6A17_MOUSE	inf	0.00020327	0.000869351	1.62326e-05
Q91XV3	Basp1	Brain acid soluble protein 1	BASP1_MOUSE	4.75356	0.000204196	0.000871954	0.000294227
Q9WV92-7	Epb41l3	Isoform 7 of Band 4.1-like protein 3	E41L3_MOUSE	inf	0.000208023	0.000886586	5.07899e-05
Q811D0;Q811D0-2;Q811D0-3	Dlg1	Disks large homolog 1;Isoform 2 of Disks large homolog 1;Isoform 3 of Disks large homolog 1	DLG1_MOUSE	4.74735	0.000208267	0.000886586	0.000143177
Q5F2E8	Taok1	Serine/threonine-protein kinase TAO1	TAOK1_MOUSE	inf	0.000213523	0.000907556	1.24896e-05
Q78WH7	Camk2n2	Calcium/calmodulin-dependent protein kinase II inhibitor 2	CK2N2_MOUSE	inf	0.000217457	0.000922849	7.14647e-05
Q6P069;Q6P069-2	Sri	Sorcin;Isoform 2 of Sorcin	SORCN_MOUSE	inf	0.000218897	0.000927531	7.58922e-05
Q9JMH9;Q9JMH9-1;Q9JMH9-4;Q9JMH9-6	Myo18a	Unconventional myosin-XVIIIa;Isoform 1 of Unconventional myosin-XVIIIa;Isoform 4 of Unconventional myosin-XVIIIa;Isoform 6 of Unconventional myosin-XVIIIa	MY18A_MOUSE	inf	0.000220622	0.0009334	8.64572e-06
Q9Z0H4;Q9Z0H4-11;Q9Z0H4-2;Q9Z0H4-4;Q9Z0H4-5;Q9Z0H4-6;Q9Z0H4-7;Q9Z0H4-8;Q9Z0H4-9	Celf2	CUGBP Elav-like family member 2;Isoform 11 of CUGBP Elav-like family member 2;Isoform 2 of CUGBP Elav-like family member 2;Isoform 4 of CUGBP Elav-like family member 2;Isoform 5 of CUGBP Elav-like family member 2;Isoform 6 of CUGBP Elav-like family member 2;Isoform 7 of CUGBP Elav-like family member 2;Isoform 8 of CUGBP Elav-like family member 2;Isoform 9 of CUGBP Elav-like family member 2	CELF2_MOUSE	inf	0.000222254	0.000938861	1.40336e-05
Q9EPK7	Xpo7	Exportin-7	XPO7_MOUSE	inf	0.00022374	0.000943296	1.3458e-05
P57716	Ncstn	Nicastrin	NICA_MOUSE	inf	0.00022399	0.000943296	2.735e-05
Q9DCJ5	Ndufa8	NADH dehydrogenase [ubiquinone] 1 alpha subcomplex subunit 8	NDUA8_MOUSE	inf	0.000230777	0.000970244	5.12109e-05
Q80ZJ6;Q80ZJ6-2	Zer1	Protein zer-1 homolog;Isoform 2 of Protein zer-1 homolog	ZER1_MOUSE	inf	0.000231095	0.000970244	9.67804e-06
Q9Z0X1	Aifm1	Apoptosis-inducing factor 1, mitochondrial	AIFM1_MOUSE	inf	0.000231818	0.000971799	9.84863e-06
Q9JJY3	Smpd3	Sphingomyelin phosphodiesterase 3	NSMA2_MOUSE	inf	0.000234687	0.000982327	6.55403e-06
Q8VD62	Bles03	UPF0696 protein C11orf68 homolog	CK068_MOUSE	inf	0.000240627	0.00100566	1.41849e-05
Q8VEA4	Chchd4	Mitochondrial intermembrane space import and assembly protein 40	MIA40_MOUSE	inf	0.000242748	0.00101298	3.30451e-05
Q8BL66	Eea1	Early endosome antigen 1	EEA1_MOUSE	inf	0.000249938	0.00104141	2.09957e-05
E9Q0C6	Kiaa1210	Acrosomal protein KIAA1210	K1210_MOUSE	inf	0.000251438	0.00104607	3.265e-05
P58771	Tpm1	Tropomyosin alpha-1 chain	TPM1_MOUSE	2.53701	0.000254642	0.0010578	0.000126499
P61164	Actr1a	Alpha-centractin	ACTZ_MOUSE	7.7027	0.000257611	0.00106852	6.65427e-05
P62878	Rbx1	E3 ubiquitin-protein ligase RBX1	RBX1_MOUSE	inf	0.000258793	0.00107047	2.58833e-05
P53994	Rab2a	Ras-related protein Rab-2A	RAB2A_MOUSE	4.13486	0.000258859	0.00107047	0.000121414
Q6A4J8;Q6A4J8-2;Q6A4J8-3	Usp7	Ubiquitin carboxyl-terminal hydrolase 7;Isoform 2 of Ubiquitin carboxyl-terminal hydrolase 7;Isoform 3 of Ubiquitin carboxyl-terminal hydrolase 7	UBP7_MOUSE	inf	0.000260371	0.00107511	8.0041e-06
Q62393;Q62393-2;Q62393-3	Tpd52	Tumor protein D52;Isoform 2 of Tumor protein D52;Isoform 3 of Tumor protein D52	TPD52_MOUSE	inf	0.000262288	0.00108125	2.06864e-05
P97393	Arhgap5	Rho GTPase-activating protein 5	RHG05_MOUSE	inf	0.000262646	0.00108125	9.24308e-06
Q9D1A2	Cndp2	Cytosolic non-specific dipeptidase	CNDP2_MOUSE	inf	0.00026365	0.00108377	2.59862e-05
P70290	Mpp1	55 kDa erythrocyte membrane protein	EM55_MOUSE	inf	0.000264692	0.00108642	3.30964e-05
Q8BMP6	Acbd3	Golgi resident protein GCP60	GCP60_MOUSE	inf	0.000266861	0.00109369	1.37767e-05
Q9Z1Z0;Q9Z1Z0-2	Uso1	General vesicular transport factor p115;Isoform 2 of General vesicular transport factor p115	USO1_MOUSE	inf	0.000272214	0.00111397	2.22307e-05
Q8CC21;Q8CC21-2	Ttc19	Tetratricopeptide repeat protein 19, mitochondrial;Isoform 2 of Tetratricopeptide repeat protein 19, mitochondrial	TTC19_MOUSE	inf	0.000273669	0.00111826	2.09788e-05
P97797-2	Sirpa	Isoform 2 of Tyrosine-protein phosphatase non-receptor type substrate 1	SHPS1_MOUSE	6.98058	0.000275158	0.0011222	6.74872e-05
P62823	Rab3c	Ras-related protein Rab-3C	RAB3C_MOUSE	1.67322	0.000275448	0.0011222	4.42396e-05
P50571	Gabrb1	Gamma-aminobutyric acid receptor subunit beta-1	GBRB1_MOUSE	inf	0.000276899	0.00112644	7.04988e-05
Q6DFV7	Ncoa7	Nuclear receptor coactivator 7	NCOA7_MOUSE	inf	0.000279036	0.00113345	8.63558e-06
Q812A2	Srgap3	SLIT-ROBO Rho GTPase-activating protein 3	SRGP3_MOUSE	inf	0.000279734	0.00113461	1.1925e-05
Q9EPW0	Inpp4a	Inositol polyphosphate-4-phosphatase type I A	INP4A_MOUSE	inf	0.000282035	0.00114226	1.49294e-05
Q61735	Cd47	Leukocyte surface antigen CD47	CD47_MOUSE	2.2156	0.00028542	0.00115427	3.61715e-05
Q91XF0	Pnpo	Pyridoxine-5'-phosphate oxidase	PNPO_MOUSE	inf	0.000289771	0.00117015	4.41636e-05
Q8R3Z5;Q8R3Z5-2;Q8R3Z5-3;Q8R3Z5-4	Cacnb1	Voltage-dependent L-type calcium channel subunit beta-1;Isoform 2 of Voltage-dependent L-type calcium channel subunit beta-1;Isoform 3 of Voltage-dependent L-type calcium channel subunit beta-1;Isoform 4 of Voltage-dependent L-type calcium channel subunit beta-1	CACB1_MOUSE	inf	0.000293631	0.001184	1.11636e-05
Q9DBH5	Lman2	Vesicular integral-membrane protein VIP36	LMAN2_MOUSE	inf	0.000297859	0.00119928	3.83983e-05
Q922D4;Q922D4-2;Q922D4-3;Q922D4-4	Ppp6r3	Serine/threonine-protein phosphatase 6 regulatory subunit 3;Isoform 2 of Serine/threonine-protein phosphatase 6 regulatory subunit 3;Isoform 3 of Serine/threonine-protein phosphatase 6 regulatory subunit 3;Isoform 4 of Serine/threonine-protein phosphatase 6 regulatory subunit 3	PP6R3_MOUSE	inf	0.000301082	0.00121049	8.27653e-06
Q64010	Crk	Adapter molecule crk	CRK_MOUSE	inf	0.000302891	0.0012143	1.78907e-05
P23818	Gria1	Glutamate receptor 1	GRIA1_MOUSE	inf	0.000303229	0.0012143	1.65959e-05
Q99PD7	Slc24a3	Sodium/potassium/calcium exchanger 3	NCKX3_MOUSE	inf	0.000303354	0.0012143	6.16263e-06
Q6ZPQ6;Q6ZPQ6-2	Pitpnm2	Membrane-associated phosphatidylinositol transfer protein 2;Isoform 2 of Membrane-associated phosphatidylinositol transfer protein 2	PITM2_MOUSE	inf	0.000307959	0.00123094	2.06286e-05
Q3UH60	Dip2b	Disco-interacting protein 2 homolog B	DIP2B_MOUSE	inf	0.000310072	0.00123534	1.28943e-05
Q5KU39	Vps41	Vacuolar protein sorting-associated protein 41 homolog	VPS41_MOUSE	inf	0.000310284	0.00123534	1.28138e-05
Q3TLI0	Trappc10	Trafficking protein particle complex subunit 10	TPC10_MOUSE	inf	0.000310408	0.00123534	3.26432e-05
Q8BSS9	Ppfia2	Liprin-alpha-2	LIPA2_MOUSE	inf	0.000312971	0.00124374	1.97022e-05
Q9D906	Atg7	Ubiquitin-like modifier-activating enzyme ATG7	ATG7_MOUSE	inf	0.000315768	0.00125305	1.26531e-05
Q9D967	Mdp1	Magnesium-dependent phosphatase 1	MGDP1_MOUSE	inf	0.000319187	0.0012647	1.66639e-05
Q64519	Sdc3	Syndecan-3	SDC3_MOUSE	inf	0.000319623	0.0012647	1.97771e-05
Q9QZD9	Eif3i	Eukaryotic translation initiation factor 3 subunit I	EIF3I_MOUSE	inf	0.000323586	0.00127854	1.89566e-05
Q99KQ4	Nampt	Nicotinamide phosphoribosyltransferase	NAMPT_MOUSE	inf	0.000327239	0.00128839	2.64636e-05
Q80YA9	Cnksr2	Connector enhancer of kinase suppressor of ras 2	CNKR2_MOUSE	inf	0.00032744	0.00128839	2.59175e-05
Q9R0A0	Pex14	Peroxisomal membrane protein PEX14	PEX14_MOUSE	inf	0.00032754	0.00128839	2.10735e-05
Q8R146;Q8R146-2	Apeh	Acylamino-acid-releasing enzyme;Isoform 2 of Acylamino-acid-releasing enzyme	APEH_MOUSE	inf	0.000328395	0.00128839	1.26719e-05
O70166	Stmn3	Stathmin-3	STMN3_MOUSE	inf	0.000328423	0.00128839	1.50098e-05
Q61029;Q61029-2;Q61029-3;Q61029-4;Q61033;Q61033-2	Tmpo	Lamina-associated polypeptide 2, isoforms beta/delta/epsilon/gamma;Isoform Delta of Lamina-associated polypeptide 2, isoforms beta/delta/epsilon/gamma;Isoform Epsilon of Lamina-associated polypeptide 2, isoforms beta/delta/epsilon/gamma;Isoform Gamma of Lamina-associated polypeptide 2, isoforms beta/delta/epsilon/gamma;Lamina-associated polypeptide 2, isoforms alpha/zeta;Isoform Zeta of Lamina-as…	LAP2B_MOUSE;LAP2B_MOUSE;LAP2B_MOUSE;LAP2B_MOUSE;LAP2A_MOUSE;LAP2A_MOUSE	inf	0.000329195	0.00128958	1.82033e-05
Q69ZS8	Kazn	Kazrin	KAZRN_MOUSE	inf	0.000333659	0.00130521	5.56871e-06
P84104;P84104-2	Srsf3	Serine/arginine-rich splicing factor 3;Isoform Short of Serine/arginine-rich splicing factor 3	SRSF3_MOUSE	inf	0.000336806	0.00131488	2.51469e-05
A2AWA9	Rabgap1	Rab GTPase-activating protein 1	RBGP1_MOUSE	inf	0.000337784	0.00131488	1.94387e-05
E9Q8I9;E9Q8I9-2	Fry	Protein furry homolog;Isoform 2 of Protein furry homolog	FRY_MOUSE	inf	0.00033787	0.00131488	3.49678e-05
Q11011	Npepps	Puromycin-sensitive aminopeptidase	PSA_MOUSE	2.02729	0.000338043	0.00131488	4.75935e-05
Q9QYH6	Maged1	Melanoma-associated antigen D1	MAGD1_MOUSE	inf	0.000339012	0.00131679	4.46928e-06
Q3UTZ3	MAP11	Microtubule-associated protein 11	MA11_MOUSE	inf	0.000343836	0.00133364	2.95278e-05
Q60864	Stip1	Stress-induced-phosphoprotein 1	STIP1_MOUSE	3.51908	0.000348432	0.00134956	0.000347898
Q9CQS8	Sec61b	Protein transport protein Sec61 subunit beta	SC61B_MOUSE	inf	0.000352491	0.00136336	1.99194e-05
Q9JLN9	Mtor	Serine/threonine-protein kinase mTOR	MTOR_MOUSE	inf	0.000353435	0.00136509	1.10021e-05
Q8K0U4	Hspa12a	Heat shock 70 kDa protein 12A	HS12A_MOUSE	4.73655	0.000354583	0.00136761	0.000305255
P48722	Hspa4l	Heat shock 70 kDa protein 4L	HS74L_MOUSE	2.99088	0.000362732	0.00139708	0.000113026
Q3UHK1	Slc2a13	Proton myo-inositol cotransporter	MYCT_MOUSE	inf	0.000363341	0.00139747	2.09826e-05
Q9QZX7;Q9QZX7-2	Srr	Serine racemase;Isoform 2 of Serine racemase	SRR_MOUSE	inf	0.000368127	0.0014139	4.18517e-06
Q8CIQ7	Dock3	Dedicator of cytokinesis protein 3	DOCK3_MOUSE	inf	0.000368965	0.00141514	1.87214e-05
P70302	Stim1	Stromal interaction molecule 1	STIM1_MOUSE	inf	0.000376143	0.00144066	8.89116e-06
O89112	Lancl1	Glutathione S-transferase LANCL1	LANC1_MOUSE	inf	0.000379925	0.00145312	8.19477e-05
Q68FD5	Cltc	Clathrin heavy chain 1	CLH1_MOUSE	4.01554	0.000381399	0.00145673	0.000391008
Q7TSJ2	Map6	Microtubule-associated protein 6	MAP6_MOUSE	3.17803	0.000382273	0.00145805	0.000490202
Q8BKC5	Ipo5	Importin-5	IPO5_MOUSE	inf	0.000390547	0.001486	1.74874e-05
Q3V3Q7	Pacs2	Phosphofurin acidic cluster sorting protein 2	PACS2_MOUSE	inf	0.000390682	0.001486	9.55856e-06
Q03958	Pfdn6	Prefoldin subunit 6	PFD6_MOUSE	inf	0.000391883	0.00148851	2.72607e-05
P63168	Dynll1	Dynein light chain 1, cytoplasmic	DYL1_MOUSE	2.83904	0.000397328	0.00150711	0.000126237
Q8VDZ4	Zdhhc5	Palmitoyltransferase ZDHHC5	ZDHC5_MOUSE	inf	0.000400268	0.00151617	8.45078e-06
Q91V14-2	Slc12a5	Isoform 2 of Solute carrier family 12 member 5	S12A5_MOUSE	3.92553	0.000401453	0.00151856	0.000318579
Q99LT0	Dpy30	Protein dpy-30 homolog	DPY30_MOUSE	inf	0.000403644	0.00152476	4.65324e-05
Q9QYR6;Q9QYR6-2	Map1a	Microtubule-associated protein 1A;Isoform 2 of Microtubule-associated protein 1A	MAP1A_MOUSE	5.79117	0.000405498	0.00152966	0.00122317
Q9Z1X4;Q9Z1X4-2;Q9Z1X4-3	Ilf3	Interleukin enhancer-binding factor 3;Isoform 2 of Interleukin enhancer-binding factor 3;Isoform 3 of Interleukin enhancer-binding factor 3	ILF3_MOUSE	inf	0.000412942	0.0015556	1.07001e-05
Q8C5P7	Tdrp	Testis development-related protein	TDRP_MOUSE	inf	0.000415486	0.00156305	5.8253e-06
P56399	Usp5	Ubiquitin carboxyl-terminal hydrolase 5	UBP5_MOUSE	4.24527	0.000417793	0.00156958	0.000291449
Q91YM2	Arhgap35	Rho GTPase-activating protein 35	RHG35_MOUSE	inf	0.00041951	0.00157388	1.29404e-05
Q924C1;Q924C1-2	Xpo5	Exportin-5;Isoform 2 of Exportin-5	XPO5_MOUSE	inf	0.000422986	0.00158476	1.46891e-05
Q7TQH0;Q7TQH0-2;Q7TQH0-3	Atxn2l	Ataxin-2-like protein;Isoform 2 of Ataxin-2-like protein;Isoform 3 of Ataxin-2-like protein	ATX2L_MOUSE	7.22286	0.000426464	0.00159561	3.65291e-05
Q9Z2D0	Mtmr9	Myotubularin-related protein 9	MTMR9_MOUSE	inf	0.000427356	0.00159678	1.18081e-05
Q7TSE6;Q7TSE6-2	Stk38l	Serine/threonine-protein kinase 38-like;Isoform 2 of Serine/threonine-protein kinase 38-like	ST38L_MOUSE	inf	0.000428335	0.00159827	1.26271e-05
P51906	Slc1a1	Excitatory amino acid transporter 3	EAA3_MOUSE	inf	0.000429727	0.00160129	9.72966e-06
Q8R5M8;Q8R5M8-2;Q8R5M8-3;Q8R5M8-4;Q8R5M8-6;Q8R5M8-7	Cadm1	Cell adhesion molecule 1;Isoform 2 of Cell adhesion molecule 1;Isoform 3 of Cell adhesion molecule 1;Isoform 4 of Cell adhesion molecule 1;Isoform 6 of Cell adhesion molecule 1;Isoform 7 of Cell adhesion molecule 1	CADM1_MOUSE	inf	0.000433629	0.00161364	3.4994e-05
O88492;O88492-2	Plin4	Perilipin-4;Isoform 2 of Perilipin-4	PLIN4_MOUSE	4.84511	0.000435897	0.00161989	0.000440683
Q9D0B6	Pbdc1	Protein PBDC1	PBDC1_MOUSE	inf	0.000437813	0.00162472	1.2984e-05
Q9JLB9	Nectin3	Nectin-3	NECT3_MOUSE	inf	0.00043838	0.00162472	1.31336e-05
Q9CY58;Q9CY58-2;Q9CY58-3	Serbp1	Plasminogen activator inhibitor 1 RNA-binding protein;Isoform 2 of Plasminogen activator inhibitor 1 RNA-binding protein;Isoform 3 of Plasminogen activator inhibitor 1 RNA-binding protein	PAIRB_MOUSE	inf	0.000444655	0.00164576	1.12351e-05
Q02053	Uba1	Ubiquitin-like modifier-activating enzyme 1	UBA1_MOUSE	3.48576	0.000449006	0.00165944	0.000152754
P28571;P28571-1;P28571-2	Slc6a9	Sodium- and chloride-dependent glycine transporter 1;Isoform GlyT-1A of Sodium- and chloride-dependent glycine transporter 1;Isoform GlyT-1B of Sodium- and chloride-dependent glycine transporter 1	SC6A9_MOUSE	1.68836	0.000449559	0.00165944	5.43846e-05
A2A690;A2A690-2	Tanc2	Protein TANC2;Isoform 2 of Protein TANC2	TANC2_MOUSE	inf	0.000452581	0.00166705	1.42073e-05
Q14BI2	Grm2	Metabotropic glutamate receptor 2	GRM2_MOUSE	inf	0.000452833	0.00166705	1.80172e-05
Q8BNY6	Ncs1	Neuronal calcium sensor 1	NCS1_MOUSE	inf	0.000456426	0.00167804	4.42966e-05
Q9CZG9	Pdzd11	PDZ domain-containing protein 11	PDZ11_MOUSE	inf	0.000458257	0.00168252	2.64894e-05
Q6PDI6	Mindy2	Ubiquitin carboxyl-terminal hydrolase MINDY-2	MINY2_MOUSE	inf	0.000464098	0.00170169	7.96258e-06
P57746	Atp6v1d	V-type proton ATPase subunit D	VATD_MOUSE	inf	0.00046928	0.0017173	2.5461e-05
P18872	Gnao1	Guanine nucleotide-binding protein G(o) subunit alpha	GNAO_MOUSE	4.55606	0.000469603	0.0017173	0.00215695
P05063	Aldoc	Fructose-bisphosphate aldolase C	ALDOC_MOUSE	3.25737	0.000476705	0.00174096	0.000377175
P62192	Psmc1	26S proteasome regulatory subunit 4	PRS4_MOUSE	7.99652	0.0004809	0.0017478	0.000112727
P60824	Cirbp	Cold-inducible RNA-binding protein	CIRBP_MOUSE	inf	0.000481226	0.0017478	5.27077e-05
Q8BQZ4	Ralgapb	Ral GTPase-activating protein subunit beta	RLGPB_MOUSE	inf	0.000481741	0.0017478	2.08211e-05
P30275	Ckmt1	Creatine kinase U-type, mitochondrial	KCRU_MOUSE	3.20664	0.000482156	0.0017478	0.00091639
Q8JZW8	Pnma3	Paraneoplastic antigen Ma3 homolog	PNMA3_MOUSE	5.638	0.00048217	0.0017478	0.0141661
P68368	Tuba4a	Tubulin alpha-4A chain	TBA4A_MOUSE	4.95151	0.000482393	0.0017478	0.00498668
Q99K10	Nlgn1	Neuroligin-1	NLGN1_MOUSE	inf	0.000483342	0.00174893	1.41873e-05
P84089	Erh	Enhancer of rudimentary homolog	ERH_MOUSE	inf	0.000484946	0.00175243	4.03764e-05
Q8BW22	Ss18l1	Calcium-responsive transactivator	CREST_MOUSE	inf	0.000487264	0.0017585	1.16868e-05
Q9CQK7	Rwdd1	RWD domain-containing protein 1	RWDD1_MOUSE	inf	0.000501087	0.00180602	1.45362e-05
Q01063;Q01063-2	Pde4d	cAMP-specific 3',5'-cyclic phosphodiesterase 4D;Isoform 9 of cAMP-specific 3',5'-cyclic phosphodiesterase 4D	PDE4D_MOUSE	inf	0.00050301	0.00181057	1.05645e-05
Q922F4	Tubb6	Tubulin beta-6 chain	TBB6_MOUSE	5.3308	0.000506401	0.0018204	0.00298892
Q9CX86	Hnrnpa0	Heterogeneous nuclear ribonucleoprotein A0	ROA0_MOUSE	inf	0.000509224	0.00182815	4.55813e-05
P51863	Atp6v0d1	V-type proton ATPase subunit d 1	VA0D1_MOUSE	1.72021	0.000516414	0.00185155	6.15879e-05
P08551	Nefl	Neurofilament light polypeptide	NFL_MOUSE	4.80071	0.000518563	0.00185683	0.000742514
Q9QZS3;Q9QZS3-2;Q9QZS3-3;Q9QZS3-4	Numb	Protein numb homolog;Isoform 2 of Protein numb homolog;Isoform 3 of Protein numb homolog;Isoform 4 of Protein numb homolog	NUMB_MOUSE	inf	0.000524281	0.00187487	2.06568e-05
Q8VHH7	Adcy3	Adenylate cyclase type 3	ADCY3_MOUSE	inf	0.00053061	0.00189504	5.57084e-06
Q811S7;Q811S7-2;Q9ERA0;Q9ERA0-2;Q9ERA0-3	Ubp1;Ubp1;Tfcp2;Tfcp2;Tfcp2	Upstream-binding protein 1;Isoform 2 of Upstream-binding protein 1;Alpha-globin transcription factor CP2;Isoform 2 of Alpha-globin transcription factor CP2;Isoform 3 of Alpha-globin transcription factor CP2	UBIP1_MOUSE;UBIP1_MOUSE;TFCP2_MOUSE;TFCP2_MOUSE;TFCP2_MOUSE	inf	0.000540692	0.00192854	1.24648e-05
Q8CAQ8-2	Immt	Isoform 2 of MICOS complex subunit Mic60	MIC60_MOUSE	4.16799	0.000541615	0.00192933	0.00016677
Q9ERV7	Pidd1	p53-induced death domain-containing protein 1	PIDD1_MOUSE	3.45141	0.000544897	0.00193851	0.000238628
Q62261	Sptbn1	Spectrin beta chain, non-erythrocytic 1	SPTB2_MOUSE	3.67752	0.000545798	0.00193921	0.000427215
Q8CIB6	Tmem230	Transmembrane protein 230	TM230_MOUSE	inf	0.000546524	0.00193928	1.50809e-05
Q6GYP7;Q6GYP7-2	Ralgapa1	Ral GTPase-activating protein subunit alpha-1;Isoform 2 of Ral GTPase-activating protein subunit alpha-1	RGPA1_MOUSE	inf	0.000558345	0.00197794	1.75065e-05
Q9D6F9	Tubb4a	Tubulin beta-4A chain	TBB4A_MOUSE	4.39602	0.000558857	0.00197794	0.000565919
S4R1M9	Osbpl10	Oxysterol-binding protein-related protein 10	OSB10_MOUSE	inf	0.000559884	0.00197902	1.19367e-05
P60879	Snap25	Synaptosomal-associated protein 25	SNP25_MOUSE	2.34907	0.000562913	0.00198718	7.33288e-05
Q8C1M2	Znf428	Zinc finger protein 428	ZN428_MOUSE	inf	0.000569888	0.00200922	1.36975e-05
O35495;O35495-2	Cdk14	Cyclin-dependent kinase 14;Isoform 2 of Cyclin-dependent kinase 14	CDK14_MOUSE	6.88114	0.00057242	0.00201556	2.82336e-05
Q9CRB6	Tppp3	Tubulin polymerization-promoting protein family member 3	TPPP3_MOUSE	inf	0.000575167	0.00202265	4.92526e-05
Q7TMM9	Tubb2a	Tubulin beta-2A chain	TBB2A_MOUSE	5.0219	0.000577685	0.0020289	0.00463973
Q60930	Vdac2	Voltage-dependent anion-selective channel protein 2	VDAC2_MOUSE	3.02192	0.000579083	0.00203122	0.00106527
Q8CHC4	Synj1	Synaptojanin-1	SYNJ1_MOUSE	3.47554	0.000589461	0.00206499	0.00018044
P40142	Tkt	Transketolase	TKT_MOUSE	2.14805	0.000593337	0.00207592	0.00019202
Q8BKC8-2	Pi4kb	Isoform 2 of Phosphatidylinositol 4-kinase beta	PI4KB_MOUSE	inf	0.000595388	0.00208046	7.75461e-06
Q8R1T1;Q8R1T1-2	Chmp7	Charged multivesicular body protein 7;Isoform 2 of Charged multivesicular body protein 7	CHMP7_MOUSE	inf	0.000598889	0.00209003	5.97815e-05
Q64327	Mea1	Male-enhanced antigen 1	MEA1_MOUSE	inf	0.000609398	0.00212401	1.42256e-05
Q3UGY8	Arfgef3	Brefeldin A-inhibited guanine nucleotide-exchange protein 3	BIG3_MOUSE	inf	0.000615085	0.00214112	1.39482e-05
Q9ESM3	Hapln2	Hyaluronan and proteoglycan link protein 2	HPLN2_MOUSE	inf	0.000620531	0.00215735	0.00030572
P97300	Nptn	Neuroplastin	NPTN_MOUSE	inf	0.000621692	0.00215865	2.81521e-05
P14873	Map1b	Microtubule-associated protein 1B	MAP1B_MOUSE	5.07922	0.000622625	0.00215917	0.000679262
A2AHC3	Camsap1	Calmodulin-regulated spectrin-associated protein 1	CAMP1_MOUSE	inf	0.000629882	0.00218158	1.01282e-05
Q7TMY8;Q7TMY8-3;Q7TMY8-4	Huwe1	E3 ubiquitin-protein ligase HUWE1;Isoform 3 of E3 ubiquitin-protein ligase HUWE1;Isoform 4 of E3 ubiquitin-protein ligase HUWE1	HUWE1_MOUSE	inf	0.000634708	0.00219553	1.60488e-05
Q8CHP5;Q8CHP5-2	Pym1	Partner of Y14 and mago;Isoform 2 of Partner of Y14 and mago	PYM1_MOUSE	inf	0.000636905	0.00220036	3.16994e-05
P97427	Crmp1	Dihydropyrimidinase-related protein 1	DPYL1_MOUSE	3.4165	0.000645476	0.00222717	0.000734829
Q9R1P4	Psma1	Proteasome subunit alpha type-1	PSA1_MOUSE	1.98682	0.000651054	0.002241	0.000171325
Q9R1V7;Q9R1V7-2;Q9R1V7-3;Q9R1V7-4	Adam23	Disintegrin and metalloproteinase domain-containing protein 23;Isoform Beta of Disintegrin and metalloproteinase domain-containing protein 23;Isoform Gamma of Disintegrin and metalloproteinase domain-containing protein 23;Isoform Delta of Disintegrin and metalloproteinase domain-containing protein 23	ADA23_MOUSE	inf	0.000651112	0.002241	2.99199e-05
Q8BMK4	Ckap4	Cytoskeleton-associated protein 4	CKAP4_MOUSE	1.27414	0.000652755	0.00224385	0.000170442
Q9Z351;Q9Z351-13;Q9Z351-2;Q9Z351-4	Kcnq2	Potassium voltage-gated channel subfamily KQT member 2;Isoform 13 of Potassium voltage-gated channel subfamily KQT member 2;Isoform 2 of Potassium voltage-gated channel subfamily KQT member 2;Isoform 4 of Potassium voltage-gated channel subfamily KQT member 2	KCNQ2_MOUSE	inf	0.000663828	0.00227906	8.39986e-06
P42227;P42227-2;P42227-3	Stat3	Signal transducer and activator of transcription 3;Isoform Stat3B of Signal transducer and activator of transcription 3;Isoform Del-701 of Signal transducer and activator of transcription 3	STAT3_MOUSE	inf	0.000666565	0.0022856	5.53593e-06
Q9CR26	Vta1	Vacuolar protein sorting-associated protein VTA1 homolog	VTA1_MOUSE	inf	0.000669001	0.0022911	3.83554e-05
O88532	Zfr	Zinc finger RNA-binding protein	ZFR_MOUSE	inf	0.000674057	0.00230283	6.20047e-06
Q61423	Kcna4	Potassium voltage-gated channel subfamily A member 4	KCNA4_MOUSE	inf	0.000674102	0.00230283	6.99622e-06
Q7TQD2	Tppp	Tubulin polymerization-promoting protein	TPPP_MOUSE	2.11488	0.000676228	0.00230723	0.000139762
Q7TNG5	Eml2	Echinoderm microtubule-associated protein-like 2	EMAL2_MOUSE	7.1278	0.000686877	0.00234066	7.77458e-05
P61358	Rpl27	60S ribosomal protein L27	RL27_MOUSE	1.70449	0.000690067	0.00234862	0.000132382
P08752	Gnai2	Guanine nucleotide-binding protein G(i) subunit alpha-2	GNAI2_MOUSE	3.07887	0.000700254	0.00238034	0.00026185
Q3UFT3	Garem1	GRB2-associated and regulator of MAPK protein	GARE1_MOUSE	inf	0.000720672	0.00244673	1.23376e-05
Q8CCT4	Tceal5	Transcription elongation factor A protein-like 5	TCAL5_MOUSE	inf	0.000723267	0.00245251	3.13591e-05
Q80XQ2	Tbc1d5	TBC1 domain family member 5	TBCD5_MOUSE	inf	0.000732347	0.00248024	8.00451e-06
Q148V7-2	Relch	Isoform 2 of RAB11-binding protein RELCH	RELCH_MOUSE	inf	0.00073654	0.00248928	1.3165e-05
P68372	Tubb4b	Tubulin beta-4B chain	TBB4B_MOUSE	4.6236	0.000736826	0.00248928	0.00420326
Q9R0P3	Esd	S-formylglutathione hydrolase	ESTD_MOUSE	inf	0.000743899	0.00251009	3.28903e-05
Q9QY01	Ulk2	Serine/threonine-protein kinase ULK2	ULK2_MOUSE	inf	0.000752054	0.0025345	9.14879e-06
P63017	Hspa8	Heat shock cognate 71 kDa protein	HSP7C_MOUSE	3.68829	0.00075816	0.00255195	0.000741973
Q8BIK4;Q8BIK4-2	Dock9	Dedicator of cytokinesis protein 9;Isoform 2 of Dedicator of cytokinesis protein 9	DOCK9_MOUSE	inf	0.000764048	0.00256862	7.34216e-06
Q8BYR5-2;Q8BYR5-3	Cadps2	Isoform 2 of Calcium-dependent secretion activator 2;Isoform 3 of Calcium-dependent secretion activator 2	CAPS2_MOUSE	2.27416	0.000769305	0.00258002	0.000113
Q9JKF6	Nectin1	Nectin-1	NECT1_MOUSE	inf	0.000769532	0.00258002	1.7068e-05
P63328	Ppp3ca	Serine/threonine-protein phosphatase 2B catalytic subunit alpha isoform	PP2BA_MOUSE	2.54598	0.000770252	0.00258002	0.000404475
Q8BIF2;Q8BIF2-2;Q8BIF2-4;Q8BIF2-5;Q8BP71;Q8BP71-2;Q8BP71-3;Q8BP71-5;Q8BP71-6;Q8BP71-7;Q8BP71-8;Q9JJ43;Q9JJ43-2;Q9JJ43-3;Q9JJ43-4;Q9JJ43-5;Q9JJ43-6	Rbfox3;Rbfox3;Rbfox3;Rbfox3;Rbfox2;Rbfox2;Rbfox2;Rbfox2;Rbfox2;Rbfox2;Rbfox2;Rbfox1;Rbfox1;Rbfox1;Rbfox1;Rbfox1;Rbfox1	RNA binding protein fox-1 homolog 3;Isoform 2 of RNA binding protein fox-1 homolog 3;Isoform 4 of RNA binding protein fox-1 homolog 3;Isoform 5 of RNA binding protein fox-1 homolog 3;RNA binding protein fox-1 homolog 2;Isoform 2 of RNA binding protein fox-1 homolog 2;Isoform 3 of RNA binding protein fox-1 homolog 2;Isoform 5 of RNA binding protein fox-1 homolog 2;Isoform 6 of RNA binding protein …	RFOX3_MOUSE;RFOX3_MOUSE;RFOX3_MOUSE;RFOX3_MOUSE;RFOX2_MOUSE;RFOX2_MOUSE;RFOX2_MOUSE;RFOX2_MOUSE;RFOX2_MOUSE;RFOX2_MOUSE;RFOX2_MOUSE;RFOX1_MOUSE;RFOX1_MOUSE;RFOX1_MOUSE;RFOX1_MOUSE;RFOX1_MOUSE;RFOX1_MOUSE	inf	0.000777865	0.00260126	1.45386e-05
Q62188	Dpysl3	Dihydropyrimidinase-related protein 3	DPYL3_MOUSE	4.35817	0.000778486	0.00260126	0.00125413
Q99LG2	Tnpo2	Transportin-2	TNPO2_MOUSE	inf	0.000788109	0.00262988	1.19446e-05
Q6PDM2;Q6PDM2-2;Q6PDM2-3	Srsf1	Serine/arginine-rich splicing factor 1;Isoform 2 of Serine/arginine-rich splicing factor 1;Isoform 3 of Serine/arginine-rich splicing factor 1	SRSF1_MOUSE	inf	0.000788964	0.00262988	3.64882e-05
Q6NS60	Fbxo41	F-box only protein 41	FBX41_MOUSE	inf	0.000795854	0.00264963	3.03613e-05
Q9Z2V5	Hdac6	Histone deacetylase 6	HDAC6_MOUSE	inf	0.000807157	0.00268402	9.93013e-06
Q920M7	Syt17	Synaptotagmin-17	SYT17_MOUSE	inf	0.000808274	0.00268448	1.46068e-05
Q5SWP3	Nacad	NAC-alpha domain-containing protein 1	NACAD_MOUSE	inf	0.00081394	0.00270004	2.87983e-05
Q3V3V9-2	Carmil2	Isoform 2 of Capping protein, Arp2/3 and myosin-I linker protein 2	CARL2_MOUSE	inf	0.000820323	0.00271794	5.19884e-06
P97351	Rps3a	40S ribosomal protein S3a	RS3A_MOUSE	3.04132	0.000822527	0.00272196	0.000287523
Q3UHB8	Ccdc177	Coiled-coil domain-containing protein 177	CC177_MOUSE	inf	0.000829612	0.00274117	6.81465e-06
Q61553	Fscn1	Fascin	FSCN1_MOUSE	1.23073	0.000830327	0.00274117	7.03568e-05
P57780	Actn4	Alpha-actinin-4	ACTN4_MOUSE	2.07612	0.000836469	0.00275814	0.000173967
O55234	Psmb5	Proteasome subunit beta type-5	PSB5_MOUSE	1.94483	0.000846441	0.00278768	6.64716e-05
Q6I6G8	Hecw2	E3 ubiquitin-protein ligase HECW2	HECW2_MOUSE	inf	0.000848166	0.00279002	1.26338e-05
Q8CH72	Trim32	E3 ubiquitin-protein ligase TRIM32	TRI32_MOUSE	inf	0.000861851	0.00283165	1.48283e-05
Q99P72	Rtn4	Reticulon-4	RTN4_MOUSE	4.34979	0.000865275	0.0028375	0.000437279
P63101	Ywhaz	14-3-3 protein zeta/delta	1433Z_MOUSE	3.46622	0.000865696	0.0028375	0.00107193
P07901	Hsp90aa1	Heat shock protein HSP 90-alpha	HS90A_MOUSE	5.76867	0.000868482	0.00284324	0.00149182
Q925T6;Q925T6-2;Q925T6-3;Q925T6-4	Grip1	Glutamate receptor-interacting protein 1;Isoform 2 of Glutamate receptor-interacting protein 1;Isoform 3 of Glutamate receptor-interacting protein 1;Isoform 4 of Glutamate receptor-interacting protein 1	GRIP1_MOUSE	inf	0.000874729	0.00286029	2.65921e-05
Q91V92	Acly	ATP-citrate synthase	ACLY_MOUSE	3.34663	0.000879178	0.00287142	0.000143428
A2AQ07	Tubb1	Tubulin beta-1 chain	TBB1_MOUSE	4.08679	0.000887056	0.00289372	0.00186678
Q6ZPU9;Q6ZPU9-3	Kifbp	KIF-binding protein;Isoform 3 of KIF-binding protein	KBP_MOUSE	inf	0.000890801	0.00289726	1.02412e-05
P61979-3	Hnrnpk	Isoform 3 of Heterogeneous nuclear ribonucleoprotein K	HNRPK_MOUSE	4.30431	0.000891129	0.00289726	0.000303111
P63005	Pafah1b1	Platelet-activating factor acetylhydrolase IB subunit alpha	LIS1_MOUSE	2.61059	0.000891303	0.00289726	7.11658e-05
O08553	Dpysl2	Dihydropyrimidinase-related protein 2	DPYL2_MOUSE	4.35194	0.000912287	0.00296197	0.00235097
O08709	Prdx6	Peroxiredoxin-6	PRDX6_MOUSE	2.10933	0.000914527	0.00296574	0.000140162
B2RSH2	Gnai1	Guanine nucleotide-binding protein G(i) subunit alpha-1	GNAI1_MOUSE	2.67209	0.000918751	0.00297593	6.49553e-05
Q8R5H1;Q8R5H1-5	Usp15	Ubiquitin carboxyl-terminal hydrolase 15;Isoform 5 of Ubiquitin carboxyl-terminal hydrolase 15	UBP15_MOUSE	7.17205	0.000922493	0.00298454	6.11048e-05
Q9CRB9	Chchd3	MICOS complex subunit Mic19	MIC19_MOUSE	6.66642	0.000950696	0.00307217	8.61225e-05
P48774	Gstm5	Glutathione S-transferase Mu 5	GSTM5_MOUSE	2.36833	0.000972963	0.00314043	5.26748e-05
P55012	Slc12a2	Solute carrier family 12 member 2	S12A2_MOUSE	2.16467	0.000979253	0.00315703	3.02512e-05
P0DP26;P0DP27;P0DP28	Calm1;Calm2;Calm3	Calmodulin-1;Calmodulin-2;Calmodulin-3	CALM1_MOUSE;CALM2_MOUSE;CALM3_MOUSE	4.06785	0.000983713	0.00316717	0.000778953
Q9D0R8	Lsm12	Protein LSM12 homolog	LSM12_MOUSE	inf	0.000984701	0.00316717	1.13229e-05
Q03137;Q03137-2	Epha4	Ephrin type-A receptor 4;Isoform Short of Ephrin type-A receptor 4	EPHA4_MOUSE	inf	0.00099095	0.00318354	1.70061e-05
P51855	Gss	Glutathione synthetase	GSHB_MOUSE	1.85347	0.000993393	0.00318767	5.82964e-05
P17710-3	Hk1	Isoform HK1 of Hexokinase-1	HXK1_MOUSE	3.41316	0.000995008	0.00318913	0.00073978
Q9CZC8	Scrn1	Secernin-1	SCRN1_MOUSE	4.55203	0.00100774	0.00322616	0.000233221
A2CG49;A2CG49-2;A2CG49-7	Kalrn	Kalirin;Isoform 2 of Kalirin;Isoform 7 of Kalirin	KALRN_MOUSE	inf	0.00101315	0.00323972	4.96965e-06
Q8CDN6	Txnl1	Thioredoxin-like protein 1	TXNL1_MOUSE	1.90627	0.00101824	0.00325221	9.06248e-05
Q8BW75	Maob	Amine oxidase [flavin-containing] B	AOFB_MOUSE	inf	0.00102942	0.0032841	8.97424e-06
Q9CZ04;Q9CZ04-2	Cops7a	COP9 signalosome complex subunit 7a;Isoform 2 of COP9 signalosome complex subunit 7a	CSN7A_MOUSE	inf	0.00103142	0.00328668	1.02113e-05
Q9D071;Q9D071-3	Mms19	MMS19 nucleotide excision repair protein homolog;Isoform 3 of MMS19 nucleotide excision repair protein homolog	MMS19_MOUSE	inf	0.00103807	0.00330406	1.00353e-05
Q5DQR4;Q5DQR4-2;Q5DQR4-3;Q5DQR4-4;Q5DQR4-5;Q5DQR4-6	Stxbp5l	Syntaxin-binding protein 5-like;Isoform 2 of Syntaxin-binding protein 5-like;Isoform 3 of Syntaxin-binding protein 5-like;Isoform 4 of Syntaxin-binding protein 5-like;Isoform 5 of Syntaxin-binding protein 5-like;Isoform 6 of Syntaxin-binding protein 5-like	STB5L_MOUSE	inf	0.00104027	0.00330721	6.59752e-06
B1AY13	Usp24	Ubiquitin carboxyl-terminal hydrolase 24	UBP24_MOUSE	inf	0.00104526	0.00331926	1.54233e-05
P70694	Akr1c6	Estradiol 17 beta-dehydrogenase 5	DHB5_MOUSE	2.46319	0.00104806	0.0033243	0.000144852
Q8C729;Q8C729-2	Fam126b	Protein FAM126B;Isoform 2 of Protein FAM126B	F126B_MOUSE	inf	0.00104938	0.00332464	3.77344e-05
P62311	Lsm3	U6 snRNA-associated Sm-like protein LSm3	LSM3_MOUSE	5.73287	0.00105585	0.00334129	3.63993e-05
Q6P9J5	Kank4	KN motif and ankyrin repeat domain-containing protein 4	KANK4_MOUSE	inf	0.00106018	0.00335115	1.90223e-05
Q9DBT5	Ampd2	AMP deaminase 2	AMPD2_MOUSE	6.58552	0.00106466	0.00336145	4.30322e-05
Q3UQ44	Iqgap2	Ras GTPase-activating-like protein IQGAP2	IQGA2_MOUSE	inf	0.00106784	0.00336761	8.68574e-06
P05064	Aldoa	Fructose-bisphosphate aldolase A	ALDOA_MOUSE	3.07072	0.00106916	0.00336792	0.000878576
Q8CCN5	Bcas3	Breast carcinoma-amplified sequence 3 homolog	BCAS3_MOUSE	inf	0.00107275	0.00337536	1.50507e-05
P60766	Cdc42	Cell division control protein 42 homolog	CDC42_MOUSE	3.60718	0.00107965	0.00339319	0.000119395
P99024	Tubb5	Tubulin beta-5 chain	TBB5_MOUSE	5.80891	0.00108973	0.00341606	0.00142266
Q6PGF7	Exoc8	Exocyst complex component 8	EXOC8_MOUSE	inf	0.00109045	0.00341606	1.23462e-05
Q3UU96;Q3UU96-2	Cdc42bpa	Serine/threonine-protein kinase MRCK alpha;Isoform 2 of Serine/threonine-protein kinase MRCK alpha	MRCKA_MOUSE	inf	0.00109066	0.00341606	1.14356e-05
Q91XU3	Pip4k2c	Phosphatidylinositol 5-phosphate 4-kinase type-2 gamma	PI42C_MOUSE	5.87076	0.00109487	0.00342537	2.23618e-05
P70296	Pebp1	Phosphatidylethanolamine-binding protein 1	PEBP1_MOUSE	2.46167	0.00110929	0.00346654	0.000133821
P05214	Tuba3a	Tubulin alpha-3 chain	TBA3_MOUSE	4.57704	0.00111962	0.00349485	0.002837
Q9EP53;Q9EP53-2;Q9EP53-3;Q9EP53-4	Tsc1	Hamartin;Isoform 2 of Hamartin;Isoform 3 of Hamartin;Isoform 4 of Hamartin	TSC1_MOUSE	inf	0.00115451	0.00359966	5.85407e-06
P80315	Cct4	T-complex protein 1 subunit delta	TCPD_MOUSE	1.92594	0.00117396	0.00365616	0.0001255
Q5SRX1;Q5SRX1-2	Tom1l2	TOM1-like protein 2;Isoform 2 of TOM1-like protein 2	TM1L2_MOUSE	8.10833	0.00119503	0.00371756	0.000203511
Q9WV96	Timm10b	Mitochondrial import inner membrane translocase subunit Tim10 B	T10B_MOUSE	inf	0.00119832	0.00372359	1.80226e-05
Q9WTT4	Atp6v1g2	V-type proton ATPase subunit G 2	VATG2_MOUSE	inf	0.00120439	0.00373822	1.34005e-05
Q7M732	Rtl1	Retrotransposon-like protein 1	RTL1_MOUSE	inf	0.00120984	0.0037509	1.45022e-05
P62814	Atp6v1b2	V-type proton ATPase subunit B, brain isoform	VATB2_MOUSE	2.83042	0.00121341	0.00375774	0.000127043
Q9EQH3	Vps35	Vacuolar protein sorting-associated protein 35	VPS35_MOUSE	2.87535	0.00122487	0.00378897	0.000143129
Q6W8Q3	Pcp4l1	Purkinje cell protein 4-like protein 1	PC4L1_MOUSE	inf	0.0012299	0.00380024	5.91382e-06
Q9DBJ1	Pgam1	Phosphoglycerate mutase 1	PGAM1_MOUSE	1.6486	0.0012343	0.00380958	0.000107046
P63037	Dnaja1	DnaJ homolog subfamily A member 1	DNJA1_MOUSE	7.29889	0.0012381	0.00381636	8.35993e-05
P20917	Mag	Myelin-associated glycoprotein	MAG_MOUSE	2.64459	0.00123928	0.00381636	0.000271564
Q6IRU5-2	Cltb	Isoform 2 of Clathrin light chain B	CLCB_MOUSE	inf	0.00125281	0.00385373	1.03821e-05
Q9DBG3;Q9DBG3-2	Ap2b1	AP-2 complex subunit beta;Isoform 2 of AP-2 complex subunit beta	AP2B1_MOUSE	2.89688	0.00126091	0.00387432	0.000108311
P16546	Sptan1	Spectrin alpha chain, non-erythrocytic 1	SPTN1_MOUSE	4.22447	0.00126237	0.00387445	0.000639536
Q9CQR6	Ppp6c	Serine/threonine-protein phosphatase 6 catalytic subunit	PPP6_MOUSE	inf	0.00126378	0.00387445	9.74383e-06
P0C7L0;P0C7L0-2	Wipf3	WAS/WASL-interacting protein family member 3;Isoform 2 of WAS/WASL-interacting protein family member 3	WIPF3_MOUSE	inf	0.00126754	0.00388166	5.9577e-06
Q61290	Cacna1e	Voltage-dependent R-type calcium channel subunit alpha-1E	CAC1E_MOUSE	inf	0.00129411	0.00395863	2.58697e-05
Q9R1P0	Psma4	Proteasome subunit alpha type-4	PSA4_MOUSE	1.97313	0.00130085	0.00396975	0.000120765
Q9EPN1;Q9EPN1-3;Q9EPN1-4	Nbea	Neurobeachin;Isoform 3 of Neurobeachin;Isoform 4 of Neurobeachin	NBEA_MOUSE	5.90526	0.00130127	0.00396975	3.21997e-05
Q99P47	Cntnap4	Contactin-associated protein-like 4	CNTP4_MOUSE	5.44794	0.00130208	0.00396975	2.40295e-05
Q9Z0E0-2	Ncdn	Isoform 2 of Neurochondrin	NCDN_MOUSE	2.44936	0.00132399	0.00403208	0.000296509
P42859;P42859-2	Htt	Huntingtin;Isoform Short of Huntingtin	HD_MOUSE	inf	0.00132651	0.0040353	8.83539e-06
P60843	Eif4a1	Eukaryotic initiation factor 4A-I	IF4A1_MOUSE	3.92057	0.00133385	0.00405314	0.000529826
Q9Z1G3	Atp6v1c1	V-type proton ATPase subunit C 1	VATC1_MOUSE	3.45085	0.00134206	0.00407358	0.000156692
Q8VEK0	Tmem30a	Cell cycle control protein 50A	CC50A_MOUSE	inf	0.001344	0.00407498	4.65113e-05
Q922D8	Mthfd1	C-1-tetrahydrofolate synthase, cytoplasmic	C1TC_MOUSE	inf	0.00135397	0.00410068	1.00204e-05
Q9CQ22	Lamtor1	Ragulator complex protein LAMTOR1	LTOR1_MOUSE	inf	0.00138023	0.00417562	1.7866e-05
A2AN08;A2AN08-3;A2AN08-5	Ubr4	E3 ubiquitin-protein ligase UBR4;Isoform 3 of E3 ubiquitin-protein ligase UBR4;Isoform 5 of E3 ubiquitin-protein ligase UBR4	UBR4_MOUSE	inf	0.00138258	0.00417813	1.26431e-05
P48758	Cbr1	Carbonyl reductase [NADPH] 1	CBR1_MOUSE	2.00841	0.00138725	0.00418764	5.0058e-05
P50396	Gdi1	Rab GDP dissociation inhibitor alpha	GDIA_MOUSE	3.46458	0.00139531	0.00420736	0.000259935
P62715	Ppp2cb	Serine/threonine-protein phosphatase 2A catalytic subunit beta isoform	PP2AB_MOUSE	6.07231	0.00139723	0.00420854	2.96638e-05
Q61548;Q61548-2;Q61548-3	Snap91	Clathrin coat assembly protein AP180;Isoform Short of Clathrin coat assembly protein AP180;Isoform 3 of Clathrin coat assembly protein AP180	AP180_MOUSE	3.4573	0.0014084	0.00423754	0.000166382
Q9QUM9	Psma6	Proteasome subunit alpha type-6	PSA6_MOUSE	1.19614	0.00141101	0.00424075	4.29787e-05
P50516	Atp6v1a	V-type proton ATPase catalytic subunit A	VATA_MOUSE	3.35405	0.00141257	0.00424081	0.000268376
Q6ZPE2;Q6ZPE2-2	Sbf1	Myotubularin-related protein 5;Isoform 2 of Myotubularin-related protein 5	MTMR5_MOUSE	inf	0.00141629	0.00424734	1.14547e-05
P47857	Pfkm	ATP-dependent 6-phosphofructokinase, muscle type	PFKAM_MOUSE	2.91223	0.0014271	0.00427509	0.000178206
A2AGT5;A2AGT5-2;A2AGT5-3	Ckap5	Cytoskeleton-associated protein 5;Isoform 2 of Cytoskeleton-associated protein 5;Isoform 3 of Cytoskeleton-associated protein 5	CKAP5_MOUSE	5.16767	0.00143834	0.00430406	2.07716e-05
Q6VNB8	Wdfy3	WD repeat and FYVE domain-containing protein 3	WDFY3_MOUSE	inf	0.00144248	0.00431177	7.83407e-06
Q99P58	Rab27b	Ras-related protein Rab-27B	RB27B_MOUSE	inf	0.00144998	0.00432948	6.2432e-06
Q9Z2A5;Q9Z2A5-2	Ate1	Arginyl-tRNA--protein transferase 1;Isoform ATE1-2 of Arginyl-tRNA--protein transferase 1	ATE1_MOUSE	inf	0.00145863	0.00435058	2.2571e-05
P49025;P49025-3;P49025-4;P49025-5	Cit	Citron Rho-interacting kinase;Isoform 3 of Citron Rho-interacting kinase;Isoform 4 of Citron Rho-interacting kinase;Isoform 5 of Citron Rho-interacting kinase	CTRO_MOUSE	7.04242	0.00146574	0.00436705	9.06099e-05
Q8VD65	Pik3r4	Phosphoinositide 3-kinase regulatory subunit 4	PI3R4_MOUSE	inf	0.00147423	0.0043876	8.92267e-06
Q6WVG3	Kctd12	BTB/POZ domain-containing protein KCTD12	KCD12_MOUSE	5.95482	0.00147989	0.00439966	4.1159e-05
Q9JMD0;Q9JMD0-2;Q9JMD0-3;Q9JMD0-4	Znf207	BUB3-interacting and GLEBS motif-containing protein ZNF207;Isoform 2 of BUB3-interacting and GLEBS motif-containing protein ZNF207;Isoform 3 of BUB3-interacting and GLEBS motif-containing protein ZNF207;Isoform 4 of BUB3-interacting and GLEBS motif-containing protein ZNF207	ZN207_MOUSE	inf	0.00148374	0.00440637	1.44799e-05
P63011	Rab3a	Ras-related protein Rab-3A	RAB3A_MOUSE	2.93023	0.00150546	0.00446604	0.000248405
Q99L43	Cds2	Phosphatidate cytidylyltransferase 2	CDS2_MOUSE	1.75295	0.00153064	0.00453583	4.32539e-05
Q91Z53	Grhpr	Glyoxylate reductase/hydroxypyruvate reductase	GRHPR_MOUSE	2.20424	0.001555	0.00460308	6.81485e-05
Q9R0Y5;Q9R0Y5-2	Ak1	Adenylate kinase isoenzyme 1;Isoform 2 of Adenylate kinase isoenzyme 1	KAD1_MOUSE	5.91198	0.00157127	0.00464621	2.78372e-05
P14824	Anxa6	Annexin A6	ANXA6_MOUSE	2.67999	0.00157457	0.00465098	0.000108618
Q9JJV2	Pfn2	Profilin-2	PROF2_MOUSE	4.56881	0.00158912	0.00468286	0.000537392
Q62277	Syp	Synaptophysin	SYPH_MOUSE	4.31653	0.00158973	0.00468286	0.000785576
Q8BG40	Katnb1	Katanin p80 WD40 repeat-containing subunit B1	KTNB1_MOUSE	inf	0.00159047	0.00468286	3.48224e-06
Q810U4;Q810U4-2;Q810U4-3	Nrcam	Neuronal cell adhesion molecule;Isoform 2 of Neuronal cell adhesion molecule;Isoform 3 of Neuronal cell adhesion molecule	NRCAM_MOUSE	inf	0.00160109	0.00470908	2.69714e-05
Q80VP0	Tecpr1	Tectonin beta-propeller repeat-containing protein 1	TCPR1_MOUSE	inf	0.00160431	0.00471351	1.2152e-05
P63030	Mpc1	Mitochondrial pyruvate carrier 1	MPC1_MOUSE	2.43856	0.0016062	0.00471404	0.000157245
Q9JHU4	Dync1h1	Cytoplasmic dynein 1 heavy chain 1	DYHC1_MOUSE	2.93333	0.00162532	0.00476506	0.000130758
P63040	Cplx1	Complexin-1	CPLX1_MOUSE	6.83604	0.00165891	0.00485837	0.000129106
Q8BIF0;Q8BIF0-2	Cd99l2	CD99 antigen-like protein 2;Isoform 2 of CD99 antigen-like protein 2	C99L2_MOUSE	inf	0.00166224	0.00486034	2.75228e-05
P62631	Eef1a2	Elongation factor 1-alpha 2	EF1A2_MOUSE	3.04553	0.00166406	0.00486034	0.000206203
Q9DB60	Prxl2b	Prostamide/prostaglandin F synthase	PXL2B_MOUSE	inf	0.00166489	0.00486034	2.15311e-05
P16125	Ldhb	L-lactate dehydrogenase B chain	LDHB_MOUSE	3.05281	0.00167048	0.00487149	0.000673068
Q9R0P9	Uchl1	Ubiquitin carboxyl-terminal hydrolase isozyme L1	UCHL1_MOUSE	2.79251	0.00167505	0.00487966	0.00018955
P38647	Hspa9	Stress-70 protein, mitochondrial	GRP75_MOUSE	2.72362	0.00169587	0.00493508	0.000283718
P42932	Cct8	T-complex protein 1 subunit theta	TCPQ_MOUSE	4.21945	0.0017242	0.00501222	0.000249925
Q61330	Cntn2	Contactin-2	CNTN2_MOUSE	inf	0.00173833	0.00504794	2.00218e-05
Q810A3	Ttc9c	Tetratricopeptide repeat protein 9C	TTC9C_MOUSE	inf	0.00174228	0.00505408	1.62223e-05
Q56A07	Scn2b	Sodium channel subunit beta-2	SCN2B_MOUSE	inf	0.00178996	0.00518692	2.39794e-05
Q6P5F9	Xpo1	Exportin-1	XPO1_MOUSE	2.20161	0.0017979	0.00520444	3.12711e-05
P14094	Atp1b1	Sodium/potassium-transporting ATPase subunit beta-1	AT1B1_MOUSE	2.69393	0.00180052	0.00520656	0.000812629
Q04690;Q04690-2	Nf1	Neurofibromin;Isoform 1 of Neurofibromin	NF1_MOUSE	inf	0.00183684	0.00530599	1.90023e-05
Q8QZY1	Eif3l	Eukaryotic translation initiation factor 3 subunit L	EIF3L_MOUSE	7.31514	0.00187559	0.00541226	0.000166381
Q8CE50	Snx30	Sorting nexin-30	SNX30_MOUSE	inf	0.00188692	0.00543922	0.000200412
Q9R0K7	Atp2b2	Plasma membrane calcium-transporting ATPase 2	AT2B2_MOUSE	2.77101	0.00189593	0.00545949	0.000223961
Q3UFQ8	Carmil3	Capping protein, Arp2/3 and myosin-I linker protein 3	CARL3_MOUSE	inf	0.00190721	0.00548622	8.42691e-06
Q9WUC3	Ly6h	Lymphocyte antigen 6H	LY6H_MOUSE	inf	0.00191712	0.00550691	3.5775e-05
Q8K183	Pdxk	Pyridoxal kinase	PDXK_MOUSE	2.83781	0.00191841	0.00550691	8.15436e-05
Q9EPU0;Q9EPU0-2	Upf1	Regulator of nonsense transcripts 1;Isoform 2 of Regulator of nonsense transcripts 1	RENT1_MOUSE	6.37268	0.00192163	0.00551042	7.13548e-05
P0CG49;P0CG50;P62983;P62984	Ubb;Ubc;Rps27a;Uba52	Polyubiquitin-B;Polyubiquitin-C;Ubiquitin-40S ribosomal protein S27a;Ubiquitin-60S ribosomal protein L40	UBB_MOUSE;UBC_MOUSE;RS27A_MOUSE;RL40_MOUSE	1.25804	0.00197296	0.0056517	0.00100657
Q9ERK7	Chrnb2	Neuronal acetylcholine receptor subunit beta-2	ACHB2_MOUSE	inf	0.00198006	0.00566613	1.00945e-05
P97798;P97798-2;P97798-3;P97798-4;P97798-5	Neo1	Neogenin;Isoform 2 of Neogenin;Isoform 3 of Neogenin;Isoform 4 of Neogenin;Isoform 5 of Neogenin	NEO1_MOUSE	inf	0.00198543	0.00567561	1.40066e-05
O54901	Cd200	OX-2 membrane glycoprotein	OX2G_MOUSE	inf	0.00200015	0.00571176	5.58615e-05
Q9CQX2	Cyb5b	Cytochrome b5 type B	CYB5B_MOUSE	5.79719	0.0020355	0.00580665	3.8215e-05
Q91Z31;Q91Z31-2	Ptbp2	Polypyrimidine tract-binding protein 2;Isoform 2 of Polypyrimidine tract-binding protein 2	PTBP2_MOUSE	inf	0.00204385	0.00582444	1.52114e-05
Q6P9K9	Nrxn3	Neurexin-3	NRX3A_MOUSE	inf	0.00205405	0.00584744	4.15513e-05
O89026	Robo1	Roundabout homolog 1	ROBO1_MOUSE	inf	0.00207152	0.00589108	8.55818e-06
Q80SW1	Ahcyl1	S-adenosylhomocysteine hydrolase-like protein 1	SAHH2_MOUSE	3.83878	0.00207639	0.00589884	0.000144972
P22892	Ap1g1	AP-1 complex subunit gamma-1	AP1G1_MOUSE	2.38713	0.00209275	0.00593531	4.79448e-05
Q8K310	Matr3	Matrin-3	MATR3_MOUSE	inf	0.00209355	0.00593531	6.73969e-06
Q9WUM4	Coro1c	Coronin-1C	COR1C_MOUSE	2.47575	0.00209866	0.00594368	5.3186e-05
Q9JIW9	Ralb	Ras-related protein Ral-B	RALB_MOUSE	6.1173	0.00214072	0.00605657	5.47614e-05
Q9QUI0	Rhoa	Transforming protein RhoA	RHOA_MOUSE	4.02843	0.00214401	0.00605963	0.000145185
Q8BVE3	Atp6v1h	V-type proton ATPase subunit H	VATH_MOUSE	3.0799	0.00215303	0.00607888	0.000107506
Q8BGE6	Atg4b	Cysteine protease ATG4B	ATG4B_MOUSE	inf	0.00216023	0.00609297	1.28658e-05
Q3UX10	Tubal3	Tubulin alpha chain-like 3	TBAL3_MOUSE	4.31504	0.00216458	0.00609896	0.00051657
P58389	Ptpa	Serine/threonine-protein phosphatase 2A activator	PTPA_MOUSE	5.27	0.00216852	0.00610382	2.16697e-05
Q9WUA3	Pfkp	ATP-dependent 6-phosphofructokinase, platelet type	PFKAP_MOUSE	3.79529	0.00218052	0.00612568	0.000239507
Q60598	Cttn	Src substrate cortactin	SRC8_MOUSE	5.07346	0.00218074	0.00612568	0.000399124
Q8BGT8	Phyhipl	Phytanoyl-CoA hydroxylase-interacting protein-like	PHIPL_MOUSE	4.09144	0.00219768	0.00616695	0.000110227
Q91V12-2	Acot7	Isoform A of Cytosolic acyl coenzyme A thioester hydrolase	BACH_MOUSE	3.04585	0.00220422	0.00617267	0.000236758
Q6PB44;Q6PB44-2	Ptpn23	Tyrosine-protein phosphatase non-receptor type 23;Isoform 2 of Tyrosine-protein phosphatase non-receptor type 23	PTN23_MOUSE	inf	0.00220435	0.00617267	1.1285e-05
Q8BJH1	Zc2hc1a	Zinc finger C2HC domain-containing protein 1A	ZC21A_MOUSE	6.52956	0.00220645	0.00617267	6.43394e-05
Q69ZS6	Sv2c	Synaptic vesicle glycoprotein 2C	SV2C_MOUSE	5.24476	0.0022162	0.00619365	6.78163e-05
Q80XI4	Pip4k2b	Phosphatidylinositol 5-phosphate 4-kinase type-2 beta	PI42B_MOUSE	2.64247	0.00222462	0.00621086	6.2956e-05
P63260	Actg1	Actin, cytoplasmic 2	ACTG_MOUSE	3.18545	0.00223914	0.00624507	0.00300869
P15116	Cdh2	Cadherin-2	CADH2_MOUSE	inf	0.00224269	0.00624863	0.000254334
P46660	Ina	Alpha-internexin	AINX_MOUSE	3.41823	0.00225116	0.00626588	0.00119238
Q922S4	Pde2a	cGMP-dependent 3',5'-cyclic phosphodiesterase	PDE2A_MOUSE	2.10674	0.0022621	0.00628996	4.01905e-05
P21278	Gna11	Guanine nucleotide-binding protein subunit alpha-11	GNA11_MOUSE	7.34133	0.0022891	0.0063586	0.000198844
Q99PJ0	Ntm	Neurotrimin	NTRI_MOUSE	inf	0.0023092	0.00640798	5.05333e-05
Q91WJ8	Fubp1	Far upstream element-binding protein 1	FUBP1_MOUSE	6.27247	0.0023118	0.00640873	7.06616e-05
Q8K1M6	Dnm1l	Dynamin-1-like protein	DNM1L_MOUSE	2.64918	0.00233722	0.00647266	0.000107469
Q9JMG7;Q9JMG7-2	Hdgfl3	Hepatoma-derived growth factor-related protein 3;Isoform 2 of Hepatoma-derived growth factor-related protein 3	HDGR3_MOUSE	inf	0.00235683	0.00652039	4.28319e-05
P62748	Hpcal1	Hippocalcin-like protein 1	HPCL1_MOUSE	6.1958	0.00237101	0.00655305	9.47798e-05
Q01065	Pde1b	Calcium/calmodulin-dependent 3',5'-cyclic nucleotide phosphodiesterase 1B	PDE1B_MOUSE	2.65268	0.0023744	0.00655581	6.77958e-05
Q8C8N2	Scai	Protein SCAI	SCAI_MOUSE	-0.983462	0.00242127	0.00667853	0.000688001
Q80TJ1-4	Cadps	Isoform 4 of Calcium-dependent secretion activator 1	CAPS1_MOUSE	2.88644	0.0024391	0.00672097	8.19612e-05
P84084	Arf5	ADP-ribosylation factor 5	ARF5_MOUSE	2.67784	0.00244445	0.00672896	0.000289694
O08532-4;O08532-5	Cacna2d1	Isoform 2D of Voltage-dependent calcium channel subunit alpha-2/delta-1;Isoform 2E of Voltage-dependent calcium channel subunit alpha-2/delta-1	CA2D1_MOUSE	inf	0.00247874	0.00681653	1.87365e-05
P46471	Psmc2	26S proteasome regulatory subunit 7	PRS7_MOUSE	7.08536	0.00249604	0.00685724	0.000156583
Q9ES28-5	Arhgef7	Isoform E of Rho guanine nucleotide exchange factor 7	ARHG7_MOUSE	inf	0.00252808	0.00693833	6.70722e-05
Q8R3V5;Q8R3V5-1;Q8R3V5-3	Sh3glb2	Endophilin-B2;Isoform 1 of Endophilin-B2;Isoform 3 of Endophilin-B2	SHLB2_MOUSE	2.9985	0.00253213	0.00694253	6.346e-05
Q8C8R3-2	Ank2	Isoform 2 of Ankyrin-2	ANK2_MOUSE	2.55554	0.00253797	0.0069516	9.158e-05
Q99KJ8	Dctn2	Dynactin subunit 2	DCTN2_MOUSE	6.88432	0.00256377	0.00701529	0.000190794
P60521	Gabarapl2	Gamma-aminobutyric acid receptor-associated protein-like 2	GBRL2_MOUSE	5.72675	0.00265356	0.00724664	4.70629e-05
P00405	Mtco2	Cytochrome c oxidase subunit 2	COX2_MOUSE	2.71293	0.00265359	0.00724664	0.000602239
Q8BXZ1	Tmx3	Protein disulfide-isomerase TMX3	TMX3_MOUSE	2.56126	0.00266379	0.00726572	0.000140676
Q6ZQ38	Cand1	Cullin-associated NEDD8-dissociated protein 1	CAND1_MOUSE	2.30573	0.00266586	0.00726572	0.00011885
Q61361	Bcan	Brevican core protein	PGCB_MOUSE	6.65343	0.00268077	0.00729912	0.000218139
P62880	Gnb2	Guanine nucleotide-binding protein G(I)/G(S)/G(T) subunit beta-2	GBB2_MOUSE	2.79159	0.00268647	0.00730742	0.00040783
Q62108;Q62108-2;Q62108-3	Dlg4	Disks large homolog 4;Isoform 2 of Disks large homolog 4;Isoform 3 of Disks large homolog 4	DLG4_MOUSE	7.64367	0.00270418	0.00734831	0.000300675
P27601	Gna13	Guanine nucleotide-binding protein subunit alpha-13	GNA13_MOUSE	5.20545	0.00272463	0.00739657	1.72607e-05
Q8BSL7	Arf2	ADP-ribosylation factor 2	ARF2_MOUSE	inf	0.00275137	0.00746179	1.95287e-05
P60710	Actb	Actin, cytoplasmic 1	ACTB_MOUSE	2.9516	0.00275526	0.00746498	0.000343356
P97765	Wbp2	WW domain-binding protein 2	WBP2_MOUSE	7.86223	0.00277239	0.00750401	0.000460964
Q5SQX6	Cyfip2	Cytoplasmic FMR1-interacting protein 2	CYFP2_MOUSE	2.18712	0.00281569	0.00761371	8.15775e-05
Q9CZW5	Tomm70	Mitochondrial import receptor subunit TOM70	TOM70_MOUSE	2.58276	0.00281854	0.00761394	8.284e-05
Q5XG69	Fam169a	Soluble lamin-associated protein of 75 kDa	F169A_MOUSE	inf	0.00285107	0.00769046	1.06576e-05
P97371	Psme1	Proteasome activator complex subunit 1	PSME1_MOUSE	2.16161	0.00285246	0.00769046	0.000169232
Q8CI94	Pygb	Glycogen phosphorylase, brain form	PYGB_MOUSE	3.28252	0.00285537	0.00769077	0.000165097
P46460	Nsf	Vesicle-fusing ATPase	NSF_MOUSE	2.79531	0.00287307	0.00773086	0.000603715
Q8VDJ3	Hdlbp	Vigilin	VIGLN_MOUSE	5.22525	0.00287785	0.00773615	1.97505e-05
O35381	Anp32a	Acidic leucine-rich nuclear phosphoprotein 32 family member A	AN32A_MOUSE	5.79315	0.00293221	0.0078746	6.4988e-05
Q62059;Q62059-3	Vcan	Versican core protein;Isoform V2 of Versican core protein	CSPG2_MOUSE	6.06128	0.00296396	0.00795209	0.000116181
Q60932-2	Vdac1	Isoform Mt-VDAC1 of Voltage-dependent anion-selective channel protein 1	VDAC1_MOUSE	2.19056	0.00296954	0.00795929	0.00034946
Q76MZ3	Ppp2r1a	Serine/threonine-protein phosphatase 2A 65 kDa regulatory subunit A alpha isoform	2AAA_MOUSE	2.94922	0.00297923	0.0079775	0.000162706
Q91YD6;Q91YD6-2	Vill	Villin-like protein;Isoform 2 of Villin-like protein	VILL_MOUSE	inf	0.00300179	0.00802289	7.77212e-06
P50153	Gng4	Guanine nucleotide-binding protein G(I)/G(S)/G(O) subunit gamma-4	GBG4_MOUSE	5.10943	0.00300202	0.00802289	3.27931e-05
P97379	G3bp2	Ras GTPase-activating protein-binding protein 2	G3BP2_MOUSE	6.65161	0.00301676	0.00805447	0.000209884
Q8CIG8	Prmt5	Protein arginine N-methyltransferase 5	ANM5_MOUSE	inf	0.0030249	0.00806835	3.04366e-05
Q9JKC6	Cend1	Cell cycle exit and neuronal differentiation protein 1	CEND_MOUSE	2.57872	0.00305219	0.00813326	0.000117024
Q8CIB5	Fermt2	Fermitin family homolog 2	FERM2_MOUSE	inf	0.00306542	0.00815941	1.42241e-05
Q6PFX7;Q6PFX7-2	Nyap1	Neuronal tyrosine-phosphorylated phosphoinositide-3-kinase adapter 1;Isoform 2 of Neuronal tyrosine-phosphorylated phosphoinositide-3-kinase adapter 1	NYAP1_MOUSE	inf	0.00306794	0.00815941	5.85222e-06
P68254;P68254-2	Ywhaq	14-3-3 protein theta;Isoform 2 of 14-3-3 protein theta	1433T_MOUSE	2.93644	0.0030945	0.00822211	0.000317346
Q9DC07	Nebl	LIM zinc-binding domain-containing Nebulette	LNEBL_MOUSE	5.81028	0.0031021	0.00822797	4.76003e-05
Q7TPS5;Q7TPS5-2;Q7TPS5-3	C2cd5	C2 domain-containing protein 5;Isoform 2 of C2 domain-containing protein 5;Isoform 3 of C2 domain-containing protein 5	C2CD5_MOUSE	inf	0.00310269	0.00822797	4.34922e-06
Q9QXS6	Dbn1	Drebrin	DREB_MOUSE	6.55194	0.0031129	0.00824708	0.000241863
P70232	Chl1	Neural cell adhesion molecule L1-like protein	NCHL1_MOUSE	inf	0.00312898	0.00828172	1.62199e-05
Q8C8R3-4	Ank2	Isoform 4 of Ankyrin-2	ANK2_MOUSE	2.44332	0.00314297	0.00831075	9.55911e-05
Q8VDQ8	Sirt2	NAD-dependent protein deacetylase sirtuin-2	SIR2_MOUSE	1.4919	0.00315894	0.00834493	0.000106496
O88342	Wdr1	WD repeat-containing protein 1	WDR1_MOUSE	2.6788	0.00318642	0.0084055	8.0817e-05
Q6NZL0	Soga3	Protein SOGA3	SOGA3_MOUSE	6.33432	0.00318798	0.0084055	7.25213e-05
Q9WUB3	Pygm	Glycogen phosphorylase, muscle form	PYGM_MOUSE	2.14963	0.00320104	0.00843186	0.00035249
Q80TK0	Kiaa1107	AP2-interacting clathrin-endocytosis protein	K1107_MOUSE	inf	0.00321211	0.00845293	1.17445e-05
Q8BFY6	Pef1	Peflin	PEF1_MOUSE	6.40824	0.00323236	0.00849808	0.000110276
P08553	Nefm	Neurofilament medium polypeptide	NFM_MOUSE	2.96725	0.00332333	0.0087289	0.000694167
P52480	Pkm	Pyruvate kinase PKM	KPYM_MOUSE	1.76546	0.0033408	0.00876641	0.00114781
Q9WTX8;Q9WTX8-2	Mad1l1	Mitotic spindle assembly checkpoint protein MAD1;Isoform 2 of Mitotic spindle assembly checkpoint protein MAD1	MD1L1_MOUSE	2.11063	0.00334511	0.00876901	4.92903e-05
P60122	Ruvbl1	RuvB-like 1	RUVB1_MOUSE	5.50509	0.00334817	0.00876901	2.84798e-05
Q60931	Vdac3	Voltage-dependent anion-selective channel protein 3	VDAC3_MOUSE	2.45952	0.00337172	0.00882228	0.000247731
Q9CZD3	Gars1	Glycine--tRNA ligase	GARS_MOUSE	6.11842	0.00339188	0.0088666	5.99329e-05
P68033	Actc1	Actin, alpha cardiac muscle 1	ACTC_MOUSE	2.82164	0.00339983	0.00887894	0.000777168
Q8BL65	Ablim2	Actin-binding LIM protein 2	ABLM2_MOUSE	6.73024	0.00342726	0.0089421	0.000127382
P70175	Dlg3	Disks large homolog 3	DLG3_MOUSE	6.46694	0.00351802	0.00917021	9.8642e-05
P39053;P39053-4;P39053-5	Dnm1	Dynamin-1;Isoform 4 of Dynamin-1;Isoform 5 of Dynamin-1	DYN1_MOUSE	2.98158	0.00354058	0.00922026	0.000478183
Q7TQF7	Amph	Amphiphysin	AMPH_MOUSE	6.07568	0.00355427	0.00924207	8.53865e-05
Q64133	Maoa	Amine oxidase [flavin-containing] A	AOFA_MOUSE	2.64413	0.00355568	0.00924207	4.94455e-05
P62305	Snrpe	Small nuclear ribonucleoprotein E	RUXE_MOUSE	inf	0.00357052	0.00927189	2.17599e-05
Q9QXY6	Ehd3	EH domain-containing protein 3	EHD3_MOUSE	4.56707	0.00359934	0.00933792	3.03846e-05
P61161	Actr2	Actin-related protein 2	ARP2_MOUSE	6.00345	0.00362367	0.00939217	6.51639e-05
Q62167	Ddx3x	ATP-dependent RNA helicase DDX3X	DDX3X_MOUSE	3.28477	0.00367553	0.0095176	0.00017323
Q9CQY2	Ramac	RNA guanine-N7 methyltransferase activating subunit	RAMAC_MOUSE	inf	0.00368211	0.00952569	2.69545e-05
Q6P5F6	Slc39a10	Zinc transporter ZIP10	S39AA_MOUSE	inf	0.00369805	0.00955792	6.74498e-05
Q64516;Q64516-1;Q64516-2	Gk	Glycerol kinase;Isoform 1 of Glycerol kinase;Isoform 2 of Glycerol kinase	GLPK_MOUSE	6.19502	0.00370574	0.00956882	7.4961e-05
Q80U40;Q80U40-2	Rimbp2	RIMS-binding protein 2;Isoform 2 of RIMS-binding protein 2	RIMB2_MOUSE	inf	0.00373712	0.00964079	0.000103377
P11798	Camk2a	Calcium/calmodulin-dependent protein kinase type II subunit alpha	KCC2A_MOUSE	1.21171	0.0037506	0.0096665	9.35287e-05
P17751	Tpi1	Triosephosphate isomerase	TPIS_MOUSE	2.26765	0.00386151	0.00994304	0.000323604
P21107	Tpm3	Tropomyosin alpha-3 chain	TPM3_MOUSE	1.88714	0.00386843	0.00995153	0.000204709
Q6PHZ2-5	Camk2d	Isoform 4 of Calcium/calmodulin-dependent protein kinase type II subunit delta	KCC2D_MOUSE	2.61565	0.00387345	0.00995513	0.000421883
P61982	Ywhag	14-3-3 protein gamma	1433G_MOUSE	4.55473	0.00390719	0.0100325	0.00156687
Q791V5	Mtch2	Mitochondrial carrier homolog 2	MTCH2_MOUSE	2.8283	0.0039201	0.0100562	0.000233854
O55143	Atp2a2	Sarcoplasmic/endoplasmic reticulum calcium ATPase 2	AT2A2_MOUSE	1.80187	0.00393085	0.0100671	0.000108903
P68404-2	Prkcb	Isoform Beta-II of Protein kinase C beta type	KPCB_MOUSE	2.61283	0.00393507	0.0100671	0.000120924
Q00612	G6pdx	Glucose-6-phosphate 1-dehydrogenase X	G6PD1_MOUSE	4.97335	0.00393531	0.0100671	8.47324e-05
Q6PGE7	Slc6a7	Sodium-dependent proline transporter	SC6A7_MOUSE	inf	0.00395583	0.0101023	5.26489e-06
Q8BZ98;Q8BZ98-2	Dnm3	Dynamin-3;Isoform 2 of Dynamin-3	DYN3_MOUSE	2.70972	0.00395663	0.0101023	7.77884e-05
P26645	Marcks	Myristoylated alanine-rich C-kinase substrate	MARCS_MOUSE	2.79022	0.0039601	0.0101023	7.45362e-05
Q9JJZ4	Ube2j1	Ubiquitin-conjugating enzyme E2 J1	UB2J1_MOUSE	4.3666	0.003983	0.0101513	4.17718e-05
Q8VE62	Paip1	Polyadenylate-binding protein-interacting protein 1	PAIP1_MOUSE	5.65677	0.00399467	0.0101716	4.99602e-05
Q9CX00	Ist1	IST1 homolog	IST1_MOUSE	5.58258	0.0040013	0.0101791	4.862e-05
P11499	Hsp90ab1	Heat shock protein HSP 90-beta	HS90B_MOUSE	5.20768	0.00403106	0.0102453	0.00374911
Q80YA3;Q80YA3-2	Ddhd1	Phospholipase DDHD1;Isoform 2 of Phospholipase DDHD1	DDHD1_MOUSE	inf	0.00404358	0.0102676	8.02102e-06
P54071	Idh2	Isocitrate dehydrogenase [NADP], mitochondrial	IDHP_MOUSE	0.871196	0.00407737	0.0103439	4.13936e-05
P62141	Ppp1cb	Serine/threonine-protein phosphatase PP1-beta catalytic subunit	PP1B_MOUSE	3.781	0.00412783	0.0104529	0.000130855
Q922E4	Pcyt2	Ethanolamine-phosphate cytidylyltransferase	PCY2_MOUSE	inf	0.00412793	0.0104529	1.34947e-05
O88845	Akap10	A-kinase anchor protein 10, mitochondrial	AKA10_MOUSE	inf	0.00416396	0.0105344	5.53105e-06
P80316	Cct5	T-complex protein 1 subunit epsilon	TCPE_MOUSE	3.50046	0.00419044	0.0105916	0.000106582
Q91YR1	Twf1	Twinfilin-1	TWF1_MOUSE	5.34574	0.00421009	0.0106316	2.82533e-05
Q8R1B4	Eif3c	Eukaryotic translation initiation factor 3 subunit C	EIF3C_MOUSE	6.04646	0.00421565	0.0106358	7.3484e-05
Q99JT2;Q99KH8;Q9Z2W1	Stk26;Stk24;Stk25	Serine/threonine-protein kinase 26;Serine/threonine-protein kinase 24;Serine/threonine-protein kinase 25	STK26_MOUSE;STK24_MOUSE;STK25_MOUSE	4.69459	0.0042594	0.0107363	1.289e-05
O70443	Gnaz	Guanine nucleotide-binding protein G(z) subunit alpha	GNAZ_MOUSE	5.82631	0.00426848	0.0107494	0.000153398
P46096	Syt1	Synaptotagmin-1	SYT1_MOUSE	2.01921	0.00428109	0.0107713	0.000144418
O70318	Epb41l2	Band 4.1-like protein 2	E41L2_MOUSE	inf	0.00431096	0.0108365	2.42489e-06
Q80TR1;Q80TR1-2	Adgrl1	Adhesion G protein-coupled receptor L1;Isoform 2 of Adhesion G protein-coupled receptor L1	AGRL1_MOUSE	5.86358	0.00434863	0.0109212	5.81941e-05
P42225	Stat1	Signal transducer and activator of transcription 1	STAT1_MOUSE	inf	0.00437067	0.0109665	3.99361e-05
Q8R0S4;Q8R0S4-1;Q8R0S4-2	Cacnb4	Voltage-dependent L-type calcium channel subunit beta-4;Isoform 1 of Voltage-dependent L-type calcium channel subunit beta-4;Isoform 2 of Voltage-dependent L-type calcium channel subunit beta-4	CACB4_MOUSE	5.34224	0.00440121	0.0110268	3.01891e-05
O55131	Septin7	Septin-7	SEPT7_MOUSE	2.87917	0.00440271	0.0110268	0.00010285
Q8CBE3	Wdr37	WD repeat-containing protein 37	WDR37_MOUSE	4.71654	0.00441077	0.011037	1.30577e-05
O70325;O70325-2;O70325-3	Gpx4	Phospholipid hydroperoxide glutathione peroxidase;Isoform Cytoplasmic of Phospholipid hydroperoxide glutathione peroxidase;Isoform Nuclear of Phospholipid hydroperoxide glutathione peroxidase	GPX4_MOUSE	5.47178	0.0044275	0.0110687	4.16071e-05
Q8K274	Fn3krp	Ketosamine-3-kinase	KT3K_MOUSE	inf	0.0044739	0.0111746	1.20564e-05
Q91ZU6;Q91ZU6-2;Q91ZU6-4	Dst	Dystonin;Isoform 1 of Dystonin;Isoform 4 of Dystonin	DYST_MOUSE	inf	0.00449289	0.0112118	1.28261e-05
P47708	Rph3a	Rabphilin-3A	RP3A_MOUSE	2.61136	0.00449978	0.0112135	2.92834e-05
Q9WTR5	Cdh13	Cadherin-13	CAD13_MOUSE	inf	0.0045017	0.0112135	3.36626e-05
Q9Z2Q6	Septin5	Septin-5	SEPT5_MOUSE	2.56953	0.00451063	0.0112255	6.64524e-05
Q91W50	Csde1	Cold shock domain-containing protein E1	CSDE1_MOUSE	6.01574	0.00453555	0.011274	7.81338e-05
Q78PY7	Snd1	Staphylococcal nuclease domain-containing protein 1	SND1_MOUSE	5.53544	0.0045383	0.011274	4.0007e-05
P61255	Rpl26	60S ribosomal protein L26	RL26_MOUSE	2.43028	0.00457368	0.0113517	0.000202621
Q62418;Q62418-2;Q62418-3	Dbnl	Drebrin-like protein;Isoform 2 of Drebrin-like protein;Isoform 3 of Drebrin-like protein	DBNL_MOUSE	6.07041	0.00464109	0.0115086	9.22115e-05
P28660	Nckap1	Nck-associated protein 1	NCKP1_MOUSE	1.68932	0.00465567	0.0115332	5.45077e-05
P11983	Tcp1	T-complex protein 1 subunit alpha	TCPA_MOUSE	3.93839	0.00465942	0.0115332	0.000142129
Q60902	Eps15l1	Epidermal growth factor receptor substrate 15-like 1	EP15R_MOUSE	6.24534	0.00472392	0.0116823	0.000119905
Q8CAA7	Pgm2l1	Glucose 1,6-bisphosphate synthase	PGM2L_MOUSE	6.21655	0.00484749	0.0119772	0.000116936
Q9DBC7	Prkar1a	cAMP-dependent protein kinase type I-alpha regulatory subunit	KAP0_MOUSE	5.64849	0.00493552	0.0121837	5.10518e-05
P58281;P58281-2	Opa1	Dynamin-like 120 kDa protein, mitochondrial;Isoform 2 of Dynamin-like 120 kDa protein, mitochondrial	OPA1_MOUSE	5.04865	0.00496439	0.012244	7.11137e-05
Q810U3	Nfasc	Neurofascin	NFASC_MOUSE	5.7185	0.00499174	0.0123004	0.000326864
O70493	Snx12	Sorting nexin-12	SNX12_MOUSE	5.96942	0.00506585	0.0124719	0.000107301
Q8BLQ9;Q8BLQ9-2;Q8BLQ9-3	Cadm2	Cell adhesion molecule 2;Isoform 2 of Cell adhesion molecule 2;Isoform 3 of Cell adhesion molecule 2	CADM2_MOUSE	5.86438	0.00507925	0.0124937	0.000252973
Q8HW98	Iglon5	IgLON family member 5	IGLO5_MOUSE	inf	0.005094	0.0125188	3.02123e-05
P62331	Arf6	ADP-ribosylation factor 6	ARF6_MOUSE	5.77888	0.00516838	0.0126902	9.65246e-05
F6SEU4	Syngap1	Ras/Rap GTPase-activating protein SynGAP	SYGP1_MOUSE	6.0679	0.00524276	0.0128614	0.00013123
O88935	Syn1	Synapsin-1	SYN1_MOUSE	2.12565	0.00537824	0.013182	0.000112592
P23819;P23819-4	Gria2	Glutamate receptor 2;Isoform 4 of Glutamate receptor 2	GRIA2_MOUSE	5.52541	0.0053856	0.0131882	6.5564e-05
Q6PIC6	Atp1a3	Sodium/potassium-transporting ATPase subunit alpha-3	AT1A3_MOUSE	1.81986	0.00540035	0.0132105	0.00120393
Q61024	Asns	Asparagine synthetase [glutamine-hydrolyzing]	ASNS_MOUSE	5.63918	0.00540432	0.0132105	0.000146125
P28652	Camk2b	Calcium/calmodulin-dependent protein kinase type II subunit beta	KCC2B_MOUSE	3.03318	0.00545697	0.0133274	0.000103155
O70435	Psma3	Proteasome subunit alpha type-3	PSA3_MOUSE	1.36977	0.00547055	0.0133382	9.39963e-05
P35278	Rab5c	Ras-related protein Rab-5C	RAB5C_MOUSE	5.6406	0.0054711	0.0133382	7.4064e-05
P24288	Bcat1	Branched-chain-amino-acid aminotransferase, cytosolic	BCAT1_MOUSE	2.63988	0.00551849	0.0134418	8.88093e-05
Q9JIF7	Copb1	Coatomer subunit beta	COPB_MOUSE	4.60936	0.00558547	0.013593	1.96143e-05
Q7TQI3	Otub1	Ubiquitin thioesterase OTUB1	OTUB1_MOUSE	6.60668	0.00559975	0.0136055	0.00029932
P51141	Dvl1	Segment polarity protein dishevelled homolog DVL-1	DVL1_MOUSE	4.68982	0.0056005	0.0136055	1.58542e-05
O35927;O35927-2	Ctnnd2	Catenin delta-2;Isoform 2 of Catenin delta-2	CTND2_MOUSE	5.75672	0.00560978	0.013616	8.89982e-05
Q3UHL1	Camkv	CaM kinase-like vesicle-associated protein	CAMKV_MOUSE	3.93861	0.00564219	0.0136826	8.58866e-05
O70161	Pip5k1c	Phosphatidylinositol 4-phosphate 5-kinase type-1 gamma	PI51C_MOUSE	6.11757	0.00579431	0.0140391	0.000142168
P01831	Thy1	Thy-1 membrane glycoprotein	THY1_MOUSE	5.40745	0.00580139	0.0140439	0.000122387
Q9JLB0-2	Mpp6	Isoform Alpha of MAGUK p55 subfamily member 6	MPP6_MOUSE	7.26496	0.00583656	0.0141166	0.000601071
P60229	Eif3e	Eukaryotic translation initiation factor 3 subunit E	EIF3E_MOUSE	5.57745	0.0058813	0.0142123	7.38105e-05
P62196	Psmc5	26S proteasome regulatory subunit 8	PRS8_MOUSE	5.21316	0.005907	0.0142619	4.09115e-05
Q02566	Myh6	Myosin-6	MYH6_MOUSE	inf	0.00594207	0.0143232	2.24086e-05
P84086	Cplx2	Complexin-2	CPLX2_MOUSE	2.87705	0.00594284	0.0143232	0.000350415
Q80Z24	Negr1	Neuronal growth regulator 1	NEGR1_MOUSE	inf	0.00599286	0.0144311	0.000107213
P62889	Rpl30	60S ribosomal protein L30	RL30_MOUSE	inf	0.00601815	0.0144794	2.80995e-05
P80318	Cct3	T-complex protein 1 subunit gamma	TCPG_MOUSE	2.71927	0.00603234	0.0145008	8.84535e-05
Q9R1P1	Psmb3	Proteasome subunit beta type-3	PSB3_MOUSE	0.828228	0.00604505	0.0145187	1.98312e-05
Q8K0T0	Rtn1	Reticulon-1	RTN1_MOUSE	3.95989	0.00606442	0.0145525	0.00071058
P11881;P11881-2;P11881-3;P11881-4;P11881-5;P11881-6;P11881-7;P11881-8	Itpr1	Inositol 1,4,5-trisphosphate receptor type 1;Isoform 2 of Inositol 1,4,5-trisphosphate receptor type 1;Isoform 3 of Inositol 1,4,5-trisphosphate receptor type 1;Isoform 4 of Inositol 1,4,5-trisphosphate receptor type 1;Isoform 5 of Inositol 1,4,5-trisphosphate receptor type 1;Isoform 6 of Inositol 1,4,5-trisphosphate receptor type 1;Isoform 7 of Inositol 1,4,5-trisphosphate receptor type 1;Isofor…	ITPR1_MOUSE	inf	0.00609092	0.0146033	1.98163e-05
Q9QYJ0	Dnaja2	DnaJ homolog subfamily A member 2	DNJA2_MOUSE	5.42273	0.00616769	0.0147745	6.39609e-05
O35737	Hnrnph1	Heterogeneous nuclear ribonucleoprotein H	HNRH1_MOUSE	3.49492	0.00617318	0.0147748	8.42816e-05
Q9QYC0	Add1	Alpha-adducin	ADDA_MOUSE	5.00409	0.0062907	0.015043	9.25522e-05
P35564	Canx	Calnexin	CALX_MOUSE	2.25913	0.00635285	0.0151675	0.000214526
P61211	Arl1	ADP-ribosylation factor-like protein 1	ARL1_MOUSE	5.05025	0.00635379	0.0151675	4.3561e-05
P12815	Pdcd6	Programmed cell death protein 6	PDCD6_MOUSE	4.94665	0.00639924	0.0152627	4.02517e-05
Q9WVJ2	Psmd13	26S proteasome non-ATPase regulatory subunit 13	PSD13_MOUSE	4.88828	0.00646427	0.0153977	2.71604e-05
O08539	Bin1	Myc box-dependent-interacting protein 1	BIN1_MOUSE	2.209	0.00646704	0.0153977	9.38369e-05
Q62093	Srsf2	Serine/arginine-rich splicing factor 2	SRSF2_MOUSE	4.85323	0.00648533	0.0154279	5.71723e-05
Q8BLK3	Lsamp	Limbic system-associated membrane protein	LSAMP_MOUSE	inf	0.00650266	0.0154558	7.00664e-05
P00493	Hprt1	Hypoxanthine-guanine phosphoribosyltransferase	HPRT_MOUSE	5.57567	0.00654155	0.0155348	7.30291e-05
P68510	Ywhah	14-3-3 protein eta	1433F_MOUSE	6.68585	0.00656629	0.0155801	0.000429857
Q9WVE8	Pacsin2	Protein kinase C and casein kinase substrate in neurons protein 2	PACN2_MOUSE	5.09227	0.006625	0.0157058	5.03381e-05
P60766-1	Cdc42	Isoform 1 of Cell division control protein 42 homolog	CDC42_MOUSE	5.48718	0.0066321	0.0157091	7.14147e-05
O88456	Capns1	Calpain small subunit 1	CPNS1_MOUSE	1.83307	0.00664052	0.0157155	7.88083e-05
O35226;O35226-2	Psmd4	26S proteasome non-ATPase regulatory subunit 4;Isoform Rpn10B of 26S proteasome non-ATPase regulatory subunit 4	PSMD4_MOUSE	5.17401	0.00667528	0.0157842	5.65843e-05
Q3TLH4;Q3TLH4-5	Prrc2c	Protein PRRC2C;Isoform 5 of Protein PRRC2C	PRC2C_MOUSE	inf	0.00672154	0.0158799	0.000203021
Q80ZJ1	Rap2a	Ras-related protein Rap-2a	RAP2A_MOUSE	5.30456	0.00677194	0.0159853	6.85488e-05
Q08331	Calb2	Calretinin	CALB2_MOUSE	5.27197	0.00678111	0.0159932	0.000128561
Q8C1B7;Q8C1B7-2;Q8C1B7-3	Septin11	Septin-11;Isoform 2 of Septin-11;Isoform 3 of Septin-11	SEP11_MOUSE	1.62657	0.00679236	0.016006	3.05282e-05
P47941	Crkl	Crk-like protein	CRKL_MOUSE	5.07581	0.00680107	0.0160128	4.1509e-05
Q8BHW2	Oscp1	Protein OSCP1	OSCP1_MOUSE	inf	0.00682028	0.0160443	0.00011372
P47757-2	Capzb	Isoform 2 of F-actin-capping protein subunit beta	CAPZB_MOUSE	2.49208	0.0068266	0.0160454	0.000131175
G5E829	Atp2b1	Plasma membrane calcium-transporting ATPase 1	AT2B1_MOUSE	2.13679	0.00683458	0.0160505	0.000128601
P97494	Gclc	Glutamate--cysteine ligase catalytic subunit	GSH1_MOUSE	4.20791	0.00684945	0.0160717	1.44034e-05
Q9WV80	Snx1	Sorting nexin-1	SNX1_MOUSE	5.2925	0.00686721	0.0160996	5.51824e-05
O89086	Rbm3	RNA-binding protein 3	RBM3_MOUSE	4.80425	0.00692168	0.0162135	3.17169e-05
P32037	Slc2a3	Solute carrier family 2, facilitated glucose transporter member 3	GTR3_MOUSE	1.30853	0.00695276	0.0162724	4.31595e-05
P47856;P47856-2	Gfpt1	Glutamine--fructose-6-phosphate aminotransferase [isomerizing] 1;Isoform 2 of Glutamine--fructose-6-phosphate aminotransferase [isomerizing] 1	GFPT1_MOUSE	4.61915	0.00697312	0.0163062	2.09461e-05
Q9WV60	Gsk3b	Glycogen synthase kinase-3 beta	GSK3B_MOUSE	5.36795	0.00700499	0.0163668	6.54089e-05
P63321	Rala	Ras-related protein Ral-A	RALA_MOUSE	5.18066	0.00701171	0.0163686	8.05646e-05
O08585	Clta	Clathrin light chain A	CLCA_MOUSE	6.56972	0.00702023	0.0163746	0.000417485
Q99N28	Cadm3	Cell adhesion molecule 3	CADM3_MOUSE	4.69467	0.00708886	0.0165207	0.000117882
Q9QXB9	Drg2	Developmentally-regulated GTP-binding protein 2	DRG2_MOUSE	5.25013	0.00711474	0.0165669	5.07701e-05
Q4JIM5	Abl2	Tyrosine-protein kinase ABL2	ABL2_MOUSE	inf	0.0071275	0.0165826	2.8476e-05
Q9JKV1	Adrm1	Proteasomal ubiquitin receptor ADRM1	ADRM1_MOUSE	5.1668	0.00722725	0.0168005	5.69896e-05
P60764	Rac3	Ras-related C3 botulinum toxin substrate 3	RAC3_MOUSE	2.567	0.0072756	0.0168986	0.000452228
Q9WTQ5	Akap12	A-kinase anchor protein 12	AKA12_MOUSE	inf	0.00738162	0.0171304	6.24998e-05
P59481	Lman2l	VIP36-like protein	LMA2L_MOUSE	4.98372	0.0073891	0.0171332	5.61382e-05
O88935-1	Syn1	Isoform Ib of Synapsin-1	SYN1_MOUSE	2.17246	0.00743734	0.0172306	0.000167979
Q8BVI4	Qdpr	Dihydropteridine reductase	DHPR_MOUSE	2.26952	0.00747053	0.0172929	0.000242214
Q9DBS1	Tmem43	Transmembrane protein 43	TMM43_MOUSE	1.34049	0.00755637	0.0174769	3.47049e-05
P17427	Ap2a2	AP-2 complex subunit alpha-2	AP2A2_MOUSE	1.73127	0.00772234	0.0178458	8.87322e-05
O08967;P63034;P63034-2;P63034-3;Q9QX11;Q9QX11-2	Cyth3;Cyth2;Cyth2;Cyth2;Cyth1;Cyth1	Cytohesin-3;Cytohesin-2;Isoform 2 of Cytohesin-2;Isoform 3 of Cytohesin-2;Cytohesin-1;Isoform 2 of Cytohesin-1	CYH3_MOUSE;CYH2_MOUSE;CYH2_MOUSE;CYH2_MOUSE;CYH1_MOUSE;CYH1_MOUSE	4.86801	0.00777486	0.017952	3.3232e-05
Q8VDN2	Atp1a1	Sodium/potassium-transporting ATPase subunit alpha-1	AT1A1_MOUSE	1.61282	0.00791904	0.0182696	0.00195639
Q9D710	Tmx2	Thioredoxin-related transmembrane protein 2	TMX2_MOUSE	4.56254	0.00793654	0.0182946	2.45517e-05
P24549	Aldh1a1	Retinal dehydrogenase 1	AL1A1_MOUSE	2.28496	0.00803198	0.0184991	0.000101012
O08919	Numbl	Numb-like protein	NUMBL_MOUSE	5.05761	0.00805064	0.0185266	5.68077e-05
O88741	Gdap1	Ganglioside-induced differentiation-associated protein 1	GDAP1_MOUSE	5.33099	0.0080771	0.0185719	9.5638e-05
Q61885	Mog	Myelin-oligodendrocyte glycoprotein	MOG_MOUSE	2.23854	0.00810549	0.0186216	0.000483405
P80313	Cct7	T-complex protein 1 subunit eta	TCPH_MOUSE	2.48716	0.00812826	0.0186584	0.000101953
Q9D8B3	Chmp4b	Charged multivesicular body protein 4b	CHM4B_MOUSE	3.90952	0.00817207	0.0187433	2.93282e-05
P17182	Eno1	Alpha-enolase	ENOA_MOUSE	1.53849	0.00821036	0.0188154	0.000136784
Q8BG51;Q8BG51-2;Q8BG51-3;Q8BG51-4	Rhot1	Mitochondrial Rho GTPase 1;Isoform 2 of Mitochondrial Rho GTPase 1;Isoform 3 of Mitochondrial Rho GTPase 1;Isoform 4 of Mitochondrial Rho GTPase 1	MIRO1_MOUSE	4.83693	0.00841159	0.0192501	4.94191e-05
P28740-2	Kif2a	Isoform 2 of Kinesin-like protein KIF2A	KIF2A_MOUSE	5.03531	0.00841998	0.0192501	0.000137494
Q9EQF6	Dpysl5	Dihydropyrimidinase-related protein 5	DPYL5_MOUSE	2.44699	0.00842105	0.0192501	0.000112991
Q8BUV3	Gphn	Gephyrin	GEPH_MOUSE	4.88534	0.00846266	0.0193292	0.000113351
Q9Z1Z2	Strap	Serine-threonine kinase receptor-associated protein	STRAP_MOUSE	4.93048	0.00848214	0.0193576	4.68066e-05
Q7TPR4	Actn1	Alpha-actinin-1	ACTN1_MOUSE	3.30578	0.00856625	0.0195333	0.000183263
Q3UHD6;Q3UHD6-2	Snx27	Sorting nexin-27;Isoform 2 of Sorting nexin-27	SNX27_MOUSE	5.11262	0.00862755	0.0196527	0.000139146
Q6P5E8	Dgkq	Diacylglycerol kinase theta	DGKQ_MOUSE	inf	0.00863291	0.0196527	0.000200068
Q8BG05	Hnrnpa3	Heterogeneous nuclear ribonucleoprotein A3	ROA3_MOUSE	4.96767	0.00875854	0.0199222	0.000171567
Q8BK64	Ahsa1	Activator of 90 kDa heat shock protein ATPase homolog 1	AHSA1_MOUSE	4.81985	0.00888107	0.0201843	4.00308e-05
P63216	Gng3	Guanine nucleotide-binding protein G(I)/G(S)/G(O) subunit gamma-3	GBG3_MOUSE	5.25706	0.00889483	0.0201988	8.78916e-05
Q9QZ06	Tollip	Toll-interacting protein	TOLIP_MOUSE	5.28618	0.00893414	0.0202713	9.35802e-05
Q921J2	Rheb	GTP-binding protein Rheb	RHEB_MOUSE	4.55748	0.00896171	0.0203172	4.24127e-05
Q8BWT5	Dip2a	Disco-interacting protein 2 homolog A	DIP2A_MOUSE	4.33506	0.00897587	0.0203325	2.05859e-05
Q9ESW4	Agk	Acylglycerol kinase, mitochondrial	AGK_MOUSE	4.40286	0.00899612	0.0203393	2.90389e-05
Q8R1Q8	Dync1li1	Cytoplasmic dynein 1 light intermediate chain 1	DC1L1_MOUSE	5.32024	0.0089995	0.0203393	9.29483e-05
Q8VEM8	Slc25a3	Phosphate carrier protein, mitochondrial	MPCP_MOUSE	2.05785	0.00900756	0.0203393	0.000695615
P41216	Acsl1	Long-chain-fatty-acid--CoA ligase 1	ACSL1_MOUSE	4.20432	0.00900846	0.0203393	1.58761e-05
P21279	Gnaq	Guanine nucleotide-binding protein G(q) subunit alpha	GNAQ_MOUSE	6.01303	0.00902334	0.0203562	0.000515493
Q8BGN3	Enpp6	Glycerophosphocholine cholinephosphodiesterase ENPP6	ENPP6_MOUSE	inf	0.00907784	0.0204623	2.07486e-05
Q62348	Tsn	Translin	TSN_MOUSE	4.57604	0.00909342	0.0204807	2.84794e-05
Q9R0P5	Dstn	Destrin	DEST_MOUSE	5.01085	0.00912266	0.0205297	6.63042e-05
Q9CZ44;Q9CZ44-3	Nsfl1c	NSFL1 cofactor p47;Isoform 3 of NSFL1 cofactor p47	NSF1C_MOUSE	4.84308	0.00915181	0.0205785	5.98612e-05
P12023-2	App	Isoform APP695 of Amyloid-beta A4 protein	A4_MOUSE	4.46763	0.00917783	0.0206201	3.84251e-05
Q64521	Gpd2	Glycerol-3-phosphate dehydrogenase, mitochondrial	GPDM_MOUSE	2.31814	0.00922624	0.020712	8.14989e-05
Q9CPW0	Cntnap2	Contactin-associated protein-like 2	CNTP2_MOUSE	4.3447	0.00936685	0.0210105	3.69008e-05
Q8R050;Q8R050-2	Gspt1	Eukaryotic peptide chain release factor GTP-binding subunit ERF3A;Isoform 2 of Eukaryotic peptide chain release factor GTP-binding subunit ERF3A	ERF3A_MOUSE	4.43821	0.00939395	0.0210541	2.51118e-05
Q60676	Ppp5c	Serine/threonine-protein phosphatase 5	PPP5_MOUSE	4.57414	0.00941038	0.0210737	3.74074e-05
Q91VM5	Rbmxl1	RNA binding motif protein, X-linked-like-1	RMXL1_MOUSE	4.22955	0.00948149	0.0211998	3.44463e-05
P31648	Slc6a1	Sodium- and chloride-dependent GABA transporter 1	SC6A1_MOUSE	1.72247	0.00948207	0.0211998	7.85339e-05
P63141	Kcna2	Potassium voltage-gated channel subfamily A member 2	KCNA2_MOUSE	2.09809	0.00950917	0.0212431	9.74194e-05
P29341	Pabpc1	Polyadenylate-binding protein 1	PABP1_MOUSE	5.6695	0.00952305	0.0212568	0.000241694
P19246	Nefh	Neurofilament heavy polypeptide	NFH_MOUSE	1.92634	0.00956065	0.0213234	9.08384e-05
Q58A65;Q58A65-2	Spag9	C-Jun-amino-terminal kinase-interacting protein 4;Isoform 2 of C-Jun-amino-terminal kinase-interacting protein 4	JIP4_MOUSE	4.83108	0.00962326	0.0214457	4.80017e-05
Q921F2	Tardbp	TAR DNA-binding protein 43	TADBP_MOUSE	4.56655	0.00965231	0.021493	3.77991e-05
Q9QY76	Vapb	Vesicle-associated membrane protein-associated protein B	VAPB_MOUSE	5.39962	0.00967666	0.0215298	0.000122454
P54775	Psmc4	26S proteasome regulatory subunit 6B	PRS6B_MOUSE	5.05466	0.0097356	0.0216415	9.01236e-05
P09528	Fth1	Ferritin heavy chain	FRIH_MOUSE	2.22103	0.00974421	0.0216415	7.78019e-05
Q6PER3	Mapre3	Microtubule-associated protein RP/EB family member 3	MARE3_MOUSE	6.06277	0.00975369	0.0216415	0.000318451
Q61165	Slc9a1	Sodium/hydrogen exchanger 1	SL9A1_MOUSE	4.17761	0.00975835	0.0216415	1.48665e-05
Q9D0F9	Pgm1	Phosphoglucomutase-1	PGM1_MOUSE	1.2355	0.00981075	0.0217402	3.94401e-05
Q791T5;Q791T5-2	Mtch1	Mitochondrial carrier homolog 1;Isoform 2 of Mitochondrial carrier homolog 1	MTCH1_MOUSE	1.81047	0.00988631	0.02189	0.000118331
O35864	Cops5	COP9 signalosome complex subunit 5	CSN5_MOUSE	4.52617	0.00991719	0.0219407	3.76377e-05
P35235	Ptpn11	Tyrosine-protein phosphatase non-receptor type 11	PTN11_MOUSE	4.74359	0.00992914	0.0219495	5.46416e-05
P54823	Ddx6	Probable ATP-dependent RNA helicase DDX6	DDX6_MOUSE	4.67607	0.0100579	0.0221985	4.20798e-05
Q61206	Pafah1b2	Platelet-activating factor acetylhydrolase IB subunit beta	PA1B2_MOUSE	2.1589	0.0100579	0.0221985	0.000103156
P80314	Cct2	T-complex protein 1 subunit beta	TCPB_MOUSE	2.81988	0.0101038	0.0222819	9.32965e-05
P23506;P23506-2	Pcmt1	Protein-L-isoaspartate(D-aspartate) O-methyltransferase;Isoform 2 of Protein-L-isoaspartate(D-aspartate) O-methyltransferase	PIMT_MOUSE	4.47459	0.0101212	0.0223023	4.26817e-05
P35276	Rab3d	Ras-related protein Rab-3D	RAB3D_MOUSE	1.98785	0.0101347	0.0223141	0.000263977
O08529	Capn2	Calpain-2 catalytic subunit	CAN2_MOUSE	4.69558	0.0101889	0.0224155	5.22499e-05
P63085	Mapk1	Mitogen-activated protein kinase 1	MK01_MOUSE	5.55252	0.0102911	0.022588	0.00016728
O08599	Stxbp1	Syntaxin-binding protein 1	STXB1_MOUSE	1.99653	0.0102913	0.022588	0.000341071
Q9JI46	Nudt3	Diphosphoinositol polyphosphate phosphohydrolase 1	NUDT3_MOUSE	4.95749	0.0102919	0.022588	7.82723e-05
P46638	Rab11b	Ras-related protein Rab-11B	RB11B_MOUSE	5.90979	0.0103129	0.022616	0.000367328
P61021	Rab5b	Ras-related protein Rab-5B	RAB5B_MOUSE	5.02566	0.0103236	0.0226214	8.27254e-05
O88343	Slc4a4	Electrogenic sodium bicarbonate cotransporter 1	S4A4_MOUSE	1.8571	0.0105516	0.0231026	0.000187082
P53612	Rabggtb	Geranylgeranyl transferase type-2 subunit beta	PGTB2_MOUSE	4.43367	0.0106433	0.0232849	2.77454e-05
P06745	Gpi	Glucose-6-phosphate isomerase	G6PI_MOUSE	1.35023	0.0107196	0.0234331	8.27204e-05
Q60960	Kpna1	Importin subunit alpha-5	IMA5_MOUSE	4.16019	0.0107468	0.023474	1.82994e-05
Q8C7M3;Q8C7M3-2;Q8C7M3-3;Q8C7M3-4;Q8C7M3-5;Q8C7M3-6	Trim9	E3 ubiquitin-protein ligase TRIM9;Isoform 2 of E3 ubiquitin-protein ligase TRIM9;Isoform 3 of E3 ubiquitin-protein ligase TRIM9;Isoform 4 of E3 ubiquitin-protein ligase TRIM9;Isoform 5 of E3 ubiquitin-protein ligase TRIM9;Isoform 6 of E3 ubiquitin-protein ligase TRIM9	TRIM9_MOUSE	4.46164	0.0108007	0.023573	3.0717e-05
Q8VEH3	Arl8a	ADP-ribosylation factor-like protein 8A	ARL8A_MOUSE	2.29847	0.0108917	0.023748	7.83388e-05
B9EKR1	Ptprz1	Receptor-type tyrosine-protein phosphatase zeta	PTPRZ_MOUSE	6.04264	0.0108982	0.023748	0.000547583
Q8BK63;Q8BK63-2	Csnk1a1	Casein kinase I isoform alpha;Isoform 2 of Casein kinase I isoform alpha	KC1A_MOUSE	3.98814	0.0109318	0.0237867	1.54511e-05
P63094;P63094-3;Q6R0H7	Gnas	Guanine nucleotide-binding protein G(s) subunit alpha isoforms short;Isoform Gnas-3 of Guanine nucleotide-binding protein G(s) subunit alpha isoforms short;Guanine nucleotide-binding protein G(s) subunit alpha isoforms XLas	GNAS2_MOUSE;GNAS2_MOUSE;GNAS1_MOUSE	5.41514	0.0109332	0.0237867	0.000154051
P17183	Eno2	Gamma-enolase	ENOG_MOUSE	1.62154	0.0109467	0.0237885	0.00028449
P10852;P10852-2	Slc3a2	4F2 cell-surface antigen heavy chain;Isoform 2 of 4F2 cell-surface antigen heavy chain	4F2_MOUSE	1.72918	0.0109513	0.0237885	4.94144e-05
P80317	Cct6a	T-complex protein 1 subunit zeta	TCPZ_MOUSE	3.1726	0.0109922	0.0238583	8.26875e-05
O88507	Cntfr	Ciliary neurotrophic factor receptor subunit alpha	CNTFR_MOUSE	inf	0.0110399	0.023943	2.7822e-05
Q9CWZ7	Napg	Gamma-soluble NSF attachment protein	SNAG_MOUSE	5.11492	0.0111636	0.0241921	0.000122454
Q9D394	Rufy3	Protein RUFY3	RUFY3_MOUSE	5.51023	0.0111868	0.0242234	0.000178143
P50518	Atp6v1e1	V-type proton ATPase subunit E 1	VATE1_MOUSE	4.69406	0.0112072	0.0242486	7.19715e-05
P27546-4	Map4	Isoform 4 of Microtubule-associated protein 4	MAP4_MOUSE	4.55574	0.0112331	0.0242853	7.88954e-05
Q60668;Q60668-3	Hnrnpd	Heterogeneous nuclear ribonucleoprotein D0;Isoform 3 of Heterogeneous nuclear ribonucleoprotein D0	HNRPD_MOUSE	5.17205	0.011302	0.0244152	0.000153909
Q91VI7	Rnh1	Ribonuclease inhibitor	RINI_MOUSE	4.76914	0.011374	0.0245514	6.45432e-05
Q3THS6	Mat2a	S-adenosylmethionine synthase isoform type-2	METK2_MOUSE	4.48181	0.0114466	0.0246888	3.78178e-05
P31938	Map2k1	Dual specificity mitogen-activated protein kinase kinase 1	MP2K1_MOUSE	2.89767	0.011525	0.0248384	0.000115529
Q9D0M3;Q9D0M3-2	Cyc1	Cytochrome c1, heme protein, mitochondrial;Isoform 2 of Cytochrome c1, heme protein, mitochondrial	CY1_MOUSE	1.70399	0.0115506	0.0248741	0.00027686
Q9WV92;Q9WV92-2;Q9WV92-3	Epb41l3	Band 4.1-like protein 3;Isoform 2 of Band 4.1-like protein 3;Isoform 3 of Band 4.1-like protein 3	E41L3_MOUSE	1.82818	0.011567	0.0248898	0.000276583
P52480-2	Pkm	Isoform M1 of Pyruvate kinase PKM	KPYM_MOUSE	1.72222	0.0116007	0.0249428	0.000511565
O89053	Coro1a	Coronin-1A	COR1A_MOUSE	2.77764	0.0116297	0.0249857	4.99088e-05
Q99L47	St13	Hsc70-interacting protein	F10A1_MOUSE	5.78785	0.0116773	0.0250683	0.000278106
P11627	L1cam	Neural cell adhesion molecule L1	L1CAM_MOUSE	4.74934	0.0117872	0.0252846	0.000120435
Q62420	Sh3gl2	Endophilin-A1	SH3G2_MOUSE	4.60844	0.0117994	0.0252911	7.26045e-05
Q8BRT1	Clasp2	CLIP-associating protein 2	CLAP2_MOUSE	4.10065	0.0118765	0.0254365	2.64724e-05
Q61137;Q61137-2	Astn1	Astrotactin-1;Isoform 2 of Astrotactin-1	ASTN1_MOUSE	inf	0.0119676	0.0256115	7.34983e-05
Q91ZR1	Rab4b	Ras-related protein Rab-4B	RAB4B_MOUSE	3.81632	0.012034	0.0257259	1.56494e-05
Q8BH59	Slc25a12	Calcium-binding mitochondrial carrier protein Aralar1	CMC1_MOUSE	2.23295	0.0120397	0.0257259	0.000303341
Q63844	Mapk3	Mitogen-activated protein kinase 3	MK03_MOUSE	4.86354	0.0120673	0.0257647	7.72326e-05
P63242	Eif5a	Eukaryotic translation initiation factor 5A-1	IF5A1_MOUSE	2.62503	0.0121305	0.0258719	7.39448e-05
Q8CGC7	Eprs1	Bifunctional glutamate/proline--tRNA ligase	SYEP_MOUSE	4.03921	0.0121363	0.0258719	2.61213e-05
Q8R0S2;Q8R0S2-2	Iqsec1	IQ motif and SEC7 domain-containing protein 1;Isoform 2 of IQ motif and SEC7 domain-containing protein 1	IQEC1_MOUSE	3.38596	0.0121808	0.0259317	0.00016412
Q9Z130	Hnrnpdl	Heterogeneous nuclear ribonucleoprotein D-like	HNRDL_MOUSE	4.86031	0.0121832	0.0259317	0.000117928
Q9WV69	Dmtn	Dematin	DEMA_MOUSE	2.41582	0.0121978	0.0259428	0.000149064
P61226	Rap2b	Ras-related protein Rap-2b	RAP2B_MOUSE	4.14971	0.0122355	0.0260028	2.84833e-05
Q6ZWX6	Eif2s1	Eukaryotic translation initiation factor 2 subunit 1	IF2A_MOUSE	4.97832	0.0122665	0.0260486	0.000136368
Q9DCD0	Pgd	6-phosphogluconate dehydrogenase, decarboxylating	6PGD_MOUSE	4.37743	0.0122967	0.0260925	4.4193e-05
Q9EP69	Sacm1l	Phosphatidylinositide phosphatase SAC1	SAC1_MOUSE	4.25286	0.012364	0.0262151	7.00485e-05
Q8C0E2	Vps26b	Vacuolar protein sorting-associated protein 26B	VP26B_MOUSE	4.82977	0.012447	0.0263707	0.000165822
P63137-2	Gabrb2	Isoform 2 of Gamma-aminobutyric acid receptor subunit beta-2	GBRB2_MOUSE	4.53121	0.012498	0.0264584	8.89351e-05
P35282	Rab21	Ras-related protein Rab-21	RAB21_MOUSE	4.10169	0.012551	0.0265502	2.12956e-05
P97370	Atp1b3	Sodium/potassium-transporting ATPase subunit beta-3	AT1B3_MOUSE	4.39244	0.0125866	0.0266051	6.55943e-05
Q91V41	Rab14	Ras-related protein Rab-14	RAB14_MOUSE	4.87505	0.0126146	0.0266438	0.000184838
Q9WUK2;Q9WUK2-2	Eif4h	Eukaryotic translation initiation factor 4H;Isoform Short of Eukaryotic translation initiation factor 4H	IF4H_MOUSE	4.83072	0.0128148	0.0270458	0.000129961
O08530	S1pr1	Sphingosine 1-phosphate receptor 1	S1PR1_MOUSE	3.60149	0.0128876	0.0271786	1.59282e-05
Q6PAJ1	Bcr	Breakpoint cluster region protein	BCR_MOUSE	3.93925	0.0129137	0.0272127	1.98648e-05
P59325	Eif5	Eukaryotic translation initiation factor 5	IF5_MOUSE	4.26082	0.0129995	0.0273726	3.50229e-05
Q9Z1S5;Q9Z1S5-2	Septin3	Neuronal-specific septin-3;Isoform 2 of Neuronal-specific septin-3	SEPT3_MOUSE	1.68729	0.0130411	0.0274187	4.63698e-05
P63330	Ppp2ca	Serine/threonine-protein phosphatase 2A catalytic subunit alpha isoform	PP2AA_MOUSE	5.15855	0.0130413	0.0274187	0.00015001
Q80T41	Gabbr2	Gamma-aminobutyric acid type B receptor subunit 2	GABR2_MOUSE	4.78639	0.0131969	0.0277246	9.91861e-05
P57776	Eef1d	Elongation factor 1-delta	EF1D_MOUSE	4.07014	0.0132658	0.027848	2.73972e-05
Q61481;Q61481-2	Pde1a	Calcium/calmodulin-dependent 3',5'-cyclic nucleotide phosphodiesterase 1A;Isoform 4 of Calcium/calmodulin-dependent 3',5'-cyclic nucleotide phosphodiesterase 1A	PDE1A_MOUSE	3.8923	0.0132906	0.0278787	2.16074e-05
Q64674	Srm	Spermidine synthase	SPEE_MOUSE	4.05827	0.0133093	0.0278967	2.28312e-05
Q9CPU4	Mgst3	Microsomal glutathione S-transferase 3	MGST3_MOUSE	1.96208	0.0133892	0.0280275	0.00018876
Q61699	Hsph1	Heat shock protein 105 kDa	HS105_MOUSE	4.89815	0.0133921	0.0280275	0.000106783
Q61411	Hras	GTPase HRas	RASH_MOUSE	4.62442	0.0134435	0.0281138	8.06876e-05
Q63912	Omg	Oligodendrocyte-myelin glycoprotein	OMGP_MOUSE	6.04141	0.0135917	0.0284022	0.000422417
O55242;O55242-2	Sigmar1	Sigma non-opioid intracellular receptor 1;Isoform 2 of Sigma non-opioid intracellular receptor 1	SGMR1_MOUSE	3.91919	0.013647	0.0284959	1.96193e-05
P56959	Fus	RNA-binding protein FUS	FUS_MOUSE	4.9615	0.0136984	0.0285817	0.00027737
Q6P9K8	Caskin1	Caskin-1	CSKI1_MOUSE	4.18438	0.0138046	0.0287813	3.71732e-05
Q9EPJ9;Q9EPJ9-2	Arfgap1	ADP-ribosylation factor GTPase-activating protein 1;Isoform 2 of ADP-ribosylation factor GTPase-activating protein 1	ARFG1_MOUSE	3.95834	0.013839	0.0288313	2.62714e-05
O54991	Cntnap1	Contactin-associated protein 1	CNTP1_MOUSE	3.21715	0.014081	0.0292763	7.16556e-05
Q8BWY3	Etf1	Eukaryotic peptide chain release factor subunit 1	ERF1_MOUSE	4.43929	0.0140882	0.0292763	6.12474e-05
Q8R464	Cadm4	Cell adhesion molecule 4	CADM4_MOUSE	3.96927	0.0140946	0.0292763	3.55744e-05
Q9D0M5	Dynll2	Dynein light chain 2, cytoplasmic	DYL2_MOUSE	1.53714	0.0140952	0.0292763	0.000201733
P04925	Prnp	Major prion protein	PRIO_MOUSE	3.97722	0.0143877	0.0298613	3.62225e-05
Q8R081	Hnrnpl	Heterogeneous nuclear ribonucleoprotein L	HNRPL_MOUSE	4.32661	0.0144236	0.0299076	5.56022e-05
Q61301;Q61301-2	Ctnna2	Catenin alpha-2;Isoform 2 of Catenin alpha-2	CTNA2_MOUSE	4.85721	0.0144318	0.0299076	0.000104496
P97450	Atp5pf	ATP synthase-coupling factor 6, mitochondrial	ATP5J_MOUSE	1.21153	0.0144935	0.0300129	0.000682482
P51150	Rab7a	Ras-related protein Rab-7a	RAB7A_MOUSE	6.07396	0.0145308	0.0300675	0.000820483
Q8BG32	Psmd11	26S proteasome non-ATPase regulatory subunit 11	PSD11_MOUSE	4.2539	0.0147259	0.0304483	4.9379e-05
Q9D3A9;Q9D3A9-4	Ttyh1	Protein tweety homolog 1;Isoform 4 of Protein tweety homolog 1	TTYH1_MOUSE	3.3843	0.0147553	0.0304862	1.15414e-05
Q9EQQ9;Q9EQQ9-3	Oga	Protein O-GlcNAcase;Isoform 3 of Protein O-GlcNAcase	OGA_MOUSE	4.1732	0.0148475	0.0306537	4.10656e-05
P35279	Rab6a	Ras-related protein Rab-6A	RAB6A_MOUSE	4.93127	0.0149813	0.0309066	0.000242285
O35643	Ap1b1	AP-1 complex subunit beta-1	AP1B1_MOUSE	3.95535	0.0152413	0.0314194	5.78052e-05
Q9JII6	Akr1a1	Aldo-keto reductase family 1 member A1	AK1A1_MOUSE	3.64108	0.0153252	0.0315687	2.22395e-05
Q9Z218	Dpp6	Dipeptidyl aminopeptidase-like protein 6	DPP6_MOUSE	3.84708	0.0153435	0.0315828	3.48089e-05
P67778	Phb	Prohibitin	PHB_MOUSE	2.78634	0.0153578	0.0315885	4.26853e-05
Q9QUH0	Glrx	Glutaredoxin-1	GLRX1_MOUSE	3.59327	0.0154681	0.0317842	1.97468e-05
P10126	Eef1a1	Elongation factor 1-alpha 1	EF1A1_MOUSE	1.97043	0.015476	0.0317842	0.00133894
P09411	Pgk1	Phosphoglycerate kinase 1	PGK1_MOUSE	1.25331	0.0158129	0.0324518	0.000111273
P36536	Sar1a	GTP-binding protein SAR1a	SAR1A_MOUSE	4.49897	0.0158996	0.0326055	0.000113299
Q8R366	Igsf8	Immunoglobulin superfamily member 8	IGSF8_MOUSE	4.98776	0.0159621	0.0327093	0.000476311
Q62318	Trim28	Transcription intermediary factor 1-beta	TIF1B_MOUSE	3.65616	0.0159959	0.032754	2.70565e-05
Q9D289	Trappc6b	Trafficking protein particle complex subunit 6B	TPC6B_MOUSE	3.64127	0.0160404	0.0328209	2.11032e-05
Q7TQ95	Lnpk	Endoplasmic reticulum junction formation protein lunapark	LNP_MOUSE	-1.15609	0.0160622	0.0328277	0.211558
Q8BP47	NARS1	Asparagine--tRNA ligase, cytoplasmic	SYNC_MOUSE	4.31765	0.0160735	0.0328277	0.000111558
Q6PIE5	Atp1a2	Sodium/potassium-transporting ATPase subunit alpha-2	AT1A2_MOUSE	1.59468	0.0160796	0.0328277	0.00156367
Q8BH66	Atl1	Atlastin-1	ATLA1_MOUSE	5.2199	0.0162745	0.0332008	0.000217789
Q91VE0	Slc27a4	Long-chain fatty acid transport protein 4	S27A4_MOUSE	3.62989	0.0163943	0.0334206	1.59794e-05
P17426;P17426-2	Ap2a1	AP-2 complex subunit alpha-1;Isoform B of AP-2 complex subunit alpha-1	AP2A1_MOUSE	1.42532	0.0164104	0.0334286	0.000193881
Q9QYB8	Add2	Beta-adducin	ADDB_MOUSE	4.51861	0.0167711	0.0341381	0.000158862
P70349	Hint1	Histidine triad nucleotide-binding protein 1	HINT1_MOUSE	4.1035	0.0169044	0.0343779	6.6335e-05
Q8BYI9	Tnr	Tenascin-R	TENR_MOUSE	3.7611	0.0169139	0.0343779	0.000188555
O88569;O88569-2;O88569-3	Hnrnpa2b1	Heterogeneous nuclear ribonucleoproteins A2/B1;Isoform 2 of Heterogeneous nuclear ribonucleoproteins A2/B1;Isoform 3 of Heterogeneous nuclear ribonucleoproteins A2/B1	ROA2_MOUSE	4.62602	0.0169402	0.0344059	0.000251045
O54774	Ap3d1	AP-3 complex subunit delta-1	AP3D1_MOUSE	3.65066	0.0170712	0.0346464	4.57638e-05
Q9Z1Q2	Abhd16a	Phosphatidylserine lipase ABHD16A	ABHGA_MOUSE	3.92997	0.0172028	0.0348714	3.65179e-05
P17879;Q61696	Hspa1b;Hspa1a	Heat shock 70 kDa protein 1B;Heat shock 70 kDa protein 1A	HS71B_MOUSE;HS71A_MOUSE	2.48259	0.0172074	0.0348714	0.000279857
Q9Z2U1	Psma5	Proteasome subunit alpha type-5	PSA5_MOUSE	1.21013	0.0173487	0.0351317	3.20531e-05
P49722	Psma2	Proteasome subunit alpha type-2	PSA2_MOUSE	1.8715	0.0175386	0.0354901	0.000126904
Q9DB75;Q9DB75-2	Cdip1	Cell death-inducing p53-target protein 1;Isoform 2 of Cell death-inducing p53-target protein 1	CDIP1_MOUSE	3.98089	0.017739	0.0358692	4.72242e-05
Q9JI91	Actn2	Alpha-actinin-2	ACTN2_MOUSE	3.56252	0.0177599	0.0358851	1.98738e-05
Q9D7G0	Prps1	Ribose-phosphate pyrophosphokinase 1	PRPS1_MOUSE	4.44563	0.0178246	0.0359895	7.99264e-05
Q924M7	Mpi	Mannose-6-phosphate isomerase	MPI_MOUSE	3.59845	0.0178435	0.0360013	1.81035e-05
Q91YS8	Camk1	Calcium/calmodulin-dependent protein kinase type 1	KCC1A_MOUSE	3.97469	0.0179233	0.0361358	4.50154e-05
Q9D8N0	Eef1g	Elongation factor 1-gamma	EF1G_MOUSE	2.53509	0.0179505	0.036164	7.70549e-05
P10649	Gstm1	Glutathione S-transferase Mu 1	GSTM1_MOUSE	1.50696	0.0181368	0.0365125	0.000129886
P12960	Cntn1	Contactin-1	CNTN1_MOUSE	4.7894	0.0181687	0.0365501	0.000339819
O55100;O55100-2	Syngr1	Synaptogyrin-1;Isoform 1B of Synaptogyrin-1	SNG1_MOUSE	3.80779	0.0182998	0.0367868	3.46263e-05
Q9CX30;Q9CX30-2	Yif1b	Protein YIF1B;Isoform 2 of Protein YIF1B	YIF1B_MOUSE	3.58366	0.0184712	0.0371043	2.64555e-05
Q8BLJ3	Plcxd3	PI-PLC X domain-containing protein 3	PLCX3_MOUSE	inf	0.0185227	0.0371806	0.000126398
Q62283	Tspan7	Tetraspanin-7	TSN7_MOUSE	5.79588	0.0186189	0.0373302	0.000130234
Q9QXW9	Slc7a8	Large neutral amino acids transporter small subunit 2	LAT2_MOUSE	3.38326	0.0186244	0.0373302	1.30208e-05
Q60749	Khdrbs1	KH domain-containing, RNA-binding, signal transduction-associated protein 1	KHDR1_MOUSE	3.65763	0.0186469	0.0373482	3.19411e-05
Q91WQ3	Yars1	Tyrosine--tRNA ligase, cytoplasmic	SYYC_MOUSE	3.81977	0.0187029	0.0374115	3.10793e-05
Q8K4X7	Agpat4	1-acyl-sn-glycerol-3-phosphate acyltransferase delta	PLCD_MOUSE	4.13317	0.0187067	0.0374115	5.39342e-05
Q9JIF0;Q9JIF0-2;Q9JIF0-3	Prmt1	Protein arginine N-methyltransferase 1;Isoform 2 of Protein arginine N-methyltransferase 1;Isoform 3 of Protein arginine N-methyltransferase 1	ANM1_MOUSE	3.99359	0.0187193	0.0374115	5.97882e-05
Q91YQ5	Rpn1	Dolichyl-diphosphooligosaccharide--protein glycosyltransferase subunit 1	RPN1_MOUSE	1.2793	0.0187855	0.0374996	4.83607e-05
Q61656	Ddx5	Probable ATP-dependent RNA helicase DDX5	DDX5_MOUSE	3.78466	0.0187907	0.0374996	4.46026e-05
P34884	Mif	Macrophage migration inhibitory factor	MIF_MOUSE	1.60227	0.0188136	0.037518	0.000188372
Q91YE6	Ipo9	Importin-9	IPO9_MOUSE	3.40725	0.0188437	0.0375509	1.46144e-05
Q9CPV4	Glod4	Glyoxalase domain-containing protein 4	GLOD4_MOUSE	3.31344	0.0189434	0.0377221	1.51282e-05
Q9R111	Gda	Guanine deaminase	GUAD_MOUSE	1.21974	0.0189611	0.0377301	2.62614e-05
Q9CS84;Q9CS84-2;Q9CS84-3;Q9CS84-4	Nrxn1	Neurexin-1;Isoform 2a of Neurexin-1;Isoform 3a of Neurexin-1;Isoform 4a of Neurexin-1	NRX1A_MOUSE	4.10291	0.0189883	0.0377518	6.50073e-05
Q811I0	Atpaf1	ATP synthase mitochondrial F1 complex assembly factor 1	ATPF1_MOUSE	3.28681	0.0189994	0.0377518	1.3511e-05
Q3U0V1	Khsrp	Far upstream element-binding protein 2	FUBP2_MOUSE	3.79119	0.0190664	0.0378485	3.8356e-05
P36916	Gnl1	Guanine nucleotide-binding protein-like 1	GNL1_MOUSE	3.93894	0.0190756	0.0378485	8.05017e-05
P62257	Ube2h	Ubiquitin-conjugating enzyme E2 H	UBE2H_MOUSE	1.43558	0.0192431	0.0381532	0.000164656
Q9D2N4;Q9D2N4-2;Q9D2N4-3;Q9D2N4-4;Q9D2N4-7	Dtna	Dystrobrevin alpha;Isoform 2 of Dystrobrevin alpha;Isoform 3 of Dystrobrevin alpha;Isoform 4 of Dystrobrevin alpha;Isoform 7 of Dystrobrevin alpha	DTNA_MOUSE	5.6492	0.0194162	0.0384686	2.47958e-05
O54984	Get3	ATPase GET3	GET3_MOUSE	3.90081	0.0195084	0.0386236	5.45683e-05
P60335	Pcbp1	Poly(rC)-binding protein 1	PCBP1_MOUSE	4.37586	0.0195984	0.0387549	0.000116821
Q91ZX7	Lrp1	Prolow-density lipoprotein receptor-related protein 1	LRP1_MOUSE	4.14046	0.0196029	0.0387549	0.000103794
Q9JLM8	Dclk1	Serine/threonine-protein kinase DCLK1	DCLK1_MOUSE	3.98637	0.0198232	0.0391623	7.36013e-05
G3X9K3	Arfgef1	Brefeldin A-inhibited guanine nucleotide-exchange protein 1	BIG1_MOUSE	3.18722	0.0199159	0.0393171	2.98114e-05
P13595	Ncam1	Neural cell adhesion molecule 1	NCAM1_MOUSE	3.57584	0.0201252	0.0397019	0.00017047
Q9Z0V1	Kcnd3	Potassium voltage-gated channel subfamily D member 3	KCND3_MOUSE	3.91734	0.0201821	0.0397855	0.000106769
Q8CHP8	Pgp	Glycerol-3-phosphate phosphatase	PGP_MOUSE	2.29933	0.0203116	0.0400122	3.63178e-05
Q91YT0	Ndufv1	NADH dehydrogenase [ubiquinone] flavoprotein 1, mitochondrial	NDUV1_MOUSE	1.59778	0.0204831	0.0403211	4.86191e-05
Q61704	Itih3	Inter-alpha-trypsin inhibitor heavy chain H3	ITIH3_MOUSE	inf	0.0205965	0.0405154	5.7023e-06
Q64514-2	Tpp2	Isoform Short of Tripeptidyl-peptidase 2	TPP2_MOUSE	4.08973	0.0206738	0.0406382	0.000142768
Q61490	Alcam	CD166 antigen	CD166_MOUSE	3.84617	0.0207375	0.0407343	7.13012e-05
O08547	Sec22b	Vesicle-trafficking protein SEC22b	SC22B_MOUSE	3.68012	0.0207537	0.0407372	7.31233e-05
P62908	Rps3	40S ribosomal protein S3	RS3_MOUSE	2.06468	0.0207832	0.040766	0.000136345
Q99NE5-7	Rims1	Isoform 7 of Regulating synaptic membrane exocytosis protein 1	RIMS1_MOUSE	-2.26009	0.0208402	0.0408485	0.000188367
Q6ZWV3	Rpl10	60S ribosomal protein L10	RL10_MOUSE	0.914694	0.0208865	0.0409101	7.14872e-05
P61264	Stx1b	Syntaxin-1B	STX1B_MOUSE	1.44489	0.0209681	0.0410407	0.000261708
Q9CRY7	Gdpd1	Lysophospholipase D GDPD1	GDPD1_MOUSE	3.60218	0.021026	0.0411248	3.18863e-05
Q80XU3	Nucks1	Nuclear ubiquitous casein and cyclin-dependent kinase substrate 1	NUCKS_MOUSE	3.93663	0.0211281	0.0412951	6.37188e-05
Q8CI51	Pdlim5	PDZ and LIM domain protein 5	PDLI5_MOUSE	3.07127	0.0211523	0.0413132	1.22505e-05
Q8R4H2	Arhgef12	Rho guanine nucleotide exchange factor 12	ARHGC_MOUSE	3.09634	0.0212876	0.0415478	1.11433e-05
P35546	Ret	Proto-oncogene tyrosine-protein kinase receptor Ret	RET_MOUSE	3.46978	0.0213932	0.0417244	3.18273e-05
P70280	Vamp7	Vesicle-associated membrane protein 7	VAMP7_MOUSE	3.32805	0.0216491	0.0421935	2.68604e-05
Q9JMA1	Usp14	Ubiquitin carboxyl-terminal hydrolase 14	UBP14_MOUSE	4.16349	0.0216843	0.0422321	7.75609e-05
P19096	Fasn	Fatty acid synthase	FAS_MOUSE	1.41324	0.0218474	0.0425198	6.77745e-05
P24472	Gsta4	Glutathione S-transferase A4	GSTA4_MOUSE	3.23672	0.0220354	0.0428552	1.80471e-05
Q9JKK7	Tmod2	Tropomodulin-2	TMOD2_MOUSE	3.92758	0.0222295	0.0432023	0.000118054
P55096	Abcd3	ATP-binding cassette sub-family D member 3	ABCD3_MOUSE	1.18196	0.022253	0.0432173	3.00586e-05
Q9QZ88	Vps29	Vacuolar protein sorting-associated protein 29	VPS29_MOUSE	4.7685	0.0223796	0.0434325	0.000237454
P17742	Ppia	Peptidyl-prolyl cis-trans isomerase A	PPIA_MOUSE	1.46762	0.0224704	0.0435779	0.000297897
P62962	Pfn1	Profilin-1	PROF1_MOUSE	4.00066	0.0227459	0.0440811	0.000138966
P14231	Atp1b2	Sodium/potassium-transporting ATPase subunit beta-2	AT1B2_MOUSE	3.07402	0.0229746	0.0444931	0.000193488
Q9D1G1	Rab1b	Ras-related protein Rab-1B	RAB1B_MOUSE	3.41943	0.0230074	0.0445253	3.01039e-05
Q9Z2U0	Psma7	Proteasome subunit alpha type-7	PSA7_MOUSE	1.02947	0.0233487	0.0451539	8.33986e-05
Q8JZS0	Lin7a	Protein lin-7 homolog A	LIN7A_MOUSE	4.34643	0.023447	0.0453121	0.000120943
Q9DB41;Q9DB41-2	Slc25a18	Mitochondrial glutamate carrier 2;Isoform 2 of Mitochondrial glutamate carrier 2	GHC2_MOUSE	1.57535	0.0235455	0.0454707	8.1595e-05
P58252	Eef2	Elongation factor 2	EF2_MOUSE	1.92217	0.0237822	0.0458895	0.000247012
Q9Z1G4-2;Q9Z1G4-3	Atp6v0a1	Isoform A1-I of V-type proton ATPase 116 kDa subunit a isoform 1;Isoform A1-III of V-type proton ATPase 116 kDa subunit a isoform 1	VPP1_MOUSE	1.12123	0.0237958	0.0458895	0.000179269
Q3UM45	Ppp1r7	Protein phosphatase 1 regulatory subunit 7	PP1R7_MOUSE	3.59359	0.0239134	0.046084	3.44055e-05
Q8BG73	Sh3bgrl2	SH3 domain-binding glutamic acid-rich-like protein 2	SH3L2_MOUSE	3.29054	0.0240485	0.0463119	2.63529e-05
Q6NZJ6	Eif4g1	Eukaryotic translation initiation factor 4 gamma 1	IF4G1_MOUSE	3.50379	0.0242238	0.0466168	6.19302e-05
Q501J6	Ddx17	Probable ATP-dependent RNA helicase DDX17	DDX17_MOUSE	3.71771	0.0244584	0.0470354	0.000104587
Q99LX0	Park7	Parkinson disease protein 7 homolog	PARK7_MOUSE	0.978315	0.0245206	0.0471215	8.8704e-05
Q99KB8;Q99KB8-2	Hagh	Hydroxyacylglutathione hydrolase, mitochondrial;Isoform 2 of Hydroxyacylglutathione hydrolase, mitochondrial	GLO2_MOUSE	0.524292	0.0245529	0.0471215	4.18909e-05
Q9CQW1	Ykt6	Synaptobrevin homolog YKT6	YKT6_MOUSE	3.08448	0.0245549	0.0471215	1.13393e-05
P27048;P63163	Snrpb;Snrpn	Small nuclear ribonucleoprotein-associated protein B;Small nuclear ribonucleoprotein-associated protein N	RSMB_MOUSE;RSMN_MOUSE	3.17715	0.0245717	0.0471215	2.46064e-05
Q99JI4	Psmd6	26S proteasome non-ATPase regulatory subunit 6	PSMD6_MOUSE	3.11375	0.0246653	0.047268	1.39671e-05
Q8BP67	Rpl24	60S ribosomal protein L24	RL24_MOUSE	0.889646	0.0247903	0.0474745	3.96707e-05
O70228	Atp9a	Probable phospholipid-transporting ATPase IIA	ATP9A_MOUSE	3.42611	0.0250248	0.0478902	2.93137e-05
P40694	Ighmbp2	DNA-binding protein SMUBP-2	SMBP2_MOUSE	3.16777	0.0251734	0.0481411	2.42401e-05
P63276	Rps17	40S ribosomal protein S17	RS17_MOUSE	3.2317	0.0253338	0.0483352	3.16652e-05
Q99LI8	Hgs	Hepatocyte growth factor-regulated tyrosine kinase substrate	HGS_MOUSE	4.02711	0.0253366	0.0483352	8.95828e-05
Q7TMK9-2	Syncrip	Isoform 2 of Heterogeneous nuclear ribonucleoprotein Q	HNRPQ_MOUSE	3.79793	0.0253391	0.0483352	0.000117965
P62746	Rhob	Rho-related GTP-binding protein RhoB	RHOB_MOUSE	4.05022	0.0253452	0.0483352	0.000150545
Q61879	Myh10	Myosin-10	MYH10_MOUSE	1.23736	0.0253679	0.048345	6.3473e-05
P62827	Ran	GTP-binding nuclear protein Ran	RAN_MOUSE	2.1315	0.0254514	0.0484704	0.000140813
Q99JY9	Actr3	Actin-related protein 3	ARP3_MOUSE	3.96562	0.0256601	0.0488342	7.43533e-05
Q61990;Q61990-2	Pcbp2	Poly(rC)-binding protein 2;Isoform 2 of Poly(rC)-binding protein 2	PCBP2_MOUSE	4.16371	0.025731	0.0489352	0.000190238
Q9DB05	Napa	Alpha-soluble NSF attachment protein	SNAA_MOUSE	3.48519	0.0257694	0.0489744	3.21309e-05
Q9WTX5	Skp1	S-phase kinase-associated protein 1	SKP1_MOUSE	3.72366	0.0259021	0.0491926	0.000101942
P48320	Gad2	Glutamate decarboxylase 2	DCE2_MOUSE	1.29705	0.0259698	0.0492871	4.0486e-05
Q3TMP8	Tmem38a	Trimeric intracellular cation channel type A	TM38A_MOUSE	3.19656	0.0261393	0.0495745	4.49067e-05
P70195	Psmb7	Proteasome subunit beta type-7	PSB7_MOUSE	0.724717	0.0262145	0.049683	6.62142e-05
P60904	Dnajc5	DnaJ homolog subfamily C member 5	DNJC5_MOUSE	3.27209	0.0263776	0.0499577	2.59525e-05
P68181;P68181-2;P68181-3;P68181-4	Prkacb	cAMP-dependent protein kinase catalytic subunit beta;Isoform 2 of cAMP-dependent protein kinase catalytic subunit beta;Isoform 3 of cAMP-dependent protein kinase catalytic subunit beta;Isoform 4 of cAMP-dependent protein kinase catalytic subunit beta	KAPCB_MOUSE	4.25527	0.0267818	0.0506882	0.000142196
Q9WVK4	Ehd1	EH domain-containing protein 1	EHD1_MOUSE	2.93768	0.0268678	0.050816	1.27221e-05
P62821	Rab1A	Ras-related protein Rab-1A	RAB1A_MOUSE	3.86959	0.0270356	0.0510982	0.000157306
P00920	Ca2	Carbonic anhydrase 2	CAH2_MOUSE	1.35727	0.0272209	0.051413	0.000145841
P84096	Rhog	Rho-related GTP-binding protein RhoG	RHOG_MOUSE	1.34052	0.0273059	0.0515382	6.97979e-05
O55091	Impact	Protein IMPACT	IMPCT_MOUSE	4.1714	0.0273465	0.051552	0.000118926
Q8CHS8;Q8CHS8-3	Vps37a	Vacuolar protein sorting-associated protein 37A;Isoform 3 of Vacuolar protein sorting-associated protein 37A	VP37A_MOUSE	3.12756	0.027353	0.051552	2.16939e-05
P05201	Got1	Aspartate aminotransferase, cytoplasmic	AATC_MOUSE	1.11092	0.0273694	0.051552	0.000195188
Q3UEZ8	Slc10a4	Sodium/bile acid cotransporter 4	NTCP4_MOUSE	inf	0.0274717	0.0517092	3.93116e-05
P06151	Ldha	L-lactate dehydrogenase A chain	LDHA_MOUSE	2.42577	0.027529	0.0517787	0.000518606
Q64332	Syn2	Synapsin-2	SYN2_MOUSE	1.50322	0.0275463	0.0517787	0.000140285
Q99K51	Pls3	Plastin-3	PLST_MOUSE	3.65675	0.0275675	0.0517832	6.54521e-05
P70414	Slc8a1	Sodium/calcium exchanger 1	NAC1_MOUSE	3.78049	0.0276955	0.051988	7.53858e-05
Q9WV55	Vapa	Vesicle-associated membrane protein-associated protein A	VAPA_MOUSE	3.82458	0.0277663	0.0520855	0.000137046
Q8CGY8-2	Ogt	Isoform 2 of UDP-N-acetylglucosamine--peptide N-acetylglucosaminyltransferase 110 kDa subunit	OGT1_MOUSE	3.2452	0.0279875	0.0524647	2.68243e-05
Q9QXZ0	Macf1	Microtubule-actin cross-linking factor 1	MACF1_MOUSE	0.770374	0.0280852	0.0526118	0.000163226
P27546;P27546-2	Map4	Microtubule-associated protein 4;Isoform 2 of Microtubule-associated protein 4	MAP4_MOUSE	3.82786	0.0283124	0.0530014	0.000128951
Q61037;Q61037-2;Q61037-3;Q61037-4;Q61037-5;Q61037-6	Tsc2	Tuberin;Isoform A of Tuberin;Isoform B of Tuberin;Isoform C of Tuberin;Isoform D of Tuberin;Isoform E of Tuberin	TSC2_MOUSE	2.71529	0.0284862	0.0532905	8.71792e-06
P34152;P34152-2;P34152-4	Ptk2	Focal adhesion kinase 1;Isoform 2 of Focal adhesion kinase 1;Isoform 4 of Focal adhesion kinase 1	FAK1_MOUSE	3.04182	0.0285502	0.0533739	2.36817e-05
P31650	Slc6a11	Sodium- and chloride-dependent GABA transporter 3	S6A11_MOUSE	1.36348	0.0288026	0.0538091	0.00105449
Q9D819	Ppa1	Inorganic pyrophosphatase	IPYR_MOUSE	3.90035	0.0290795	0.0542692	9.20579e-05
Q3UUQ7	Pgap1	GPI inositol-deacylase	PGAP1_MOUSE	2.94187	0.0290883	0.0542692	1.62242e-05
O70252	Hmox2	Heme oxygenase 2	HMOX2_MOUSE	3.41094	0.0291692	0.0543617	3.54691e-05
Q9CQW2	Arl8b	ADP-ribosylation factor-like protein 8B	ARL8B_MOUSE	3.53253	0.0291774	0.0543617	5.88768e-05
Q61166	Mapre1	Microtubule-associated protein RP/EB family member 1	MARE1_MOUSE	3.45104	0.0295155	0.0549544	7.42785e-05
Q99LD4	Gps1	COP9 signalosome complex subunit 1	CSN1_MOUSE	3.42173	0.0298076	0.0554607	4.01878e-05
P16330	Cnp	2',3'-cyclic-nucleotide 3'-phosphodiesterase	CN37_MOUSE	1.19053	0.0300296	0.0557882	0.000775245
Q5SSL4	Abr	Active breakpoint cluster region-related protein	ABR_MOUSE	3.21225	0.0300439	0.0557882	5.49374e-05
Q99JP7	Ggt7	Glutathione hydrolase 7	GGT7_MOUSE	3.20417	0.0300452	0.0557882	5.70094e-05
P46978	Stt3a	Dolichyl-diphosphooligosaccharide--protein glycosyltransferase subunit STT3A	STT3A_MOUSE	0.549513	0.0300648	0.0557882	1.94341e-05
Q7M6Y3;Q7M6Y3-5;Q7M6Y3-6	Picalm	Phosphatidylinositol-binding clathrin assembly protein;Isoform 5 of Phosphatidylinositol-binding clathrin assembly protein;Isoform 6 of Phosphatidylinositol-binding clathrin assembly protein	PICAL_MOUSE	4.06344	0.030262	0.0561163	0.000210467
Q8K021	Scamp1	Secretory carrier-associated membrane protein 1	SCAM1_MOUSE	3.3961	0.0303351	0.0562139	0.00011791
E9PUL5	Prrt2	Proline-rich transmembrane protein 2	PRRT2_MOUSE	1.36781	0.0305448	0.0565645	1.81069e-05
Q9D5T0	Atad1	ATPase family AAA domain-containing protein 1	ATAD1_MOUSE	3.22775	0.0307455	0.0568979	5.35117e-05
P70398	Usp9x	Probable ubiquitin carboxyl-terminal hydrolase FAF-X	USP9X_MOUSE	1.97263	0.0309247	0.057191	0.000122886
Q8R307	Vps18	Vacuolar protein sorting-associated protein 18 homolog	VPS18_MOUSE	3.13404	0.0309684	0.0572333	2.4874e-05
Q9CXJ4	Abcb8	Mitochondrial potassium channel ATP-binding subunit	MITOS_MOUSE	3.46275	0.0310086	0.057269	6.38521e-05
Q64105	Spr	Sepiapterin reductase	SPRE_MOUSE	3.56847	0.0310629	0.0573309	5.53728e-05
Q3THE2	Myl12b	Myosin regulatory light chain 12B	ML12B_MOUSE	3.05098	0.0311351	0.0574256	4.88824e-05
Q61768	Kif5b	Kinesin-1 heavy chain	KINH_MOUSE	2.85739	0.0319006	0.058798	1.82538e-05
P63073	Eif4e	Eukaryotic translation initiation factor 4E	IF4E_MOUSE	2.80255	0.0322457	0.0593646	1.55021e-05
P49615	Cdk5	Cyclin-dependent-like kinase 5	CDK5_MOUSE	3.17172	0.0322512	0.0593646	5.13335e-05
Q8VEK3;Q8VEK3-2	Hnrnpu	Heterogeneous nuclear ribonucleoprotein U;Isoform 2 of Heterogeneous nuclear ribonucleoprotein U	HNRPU_MOUSE	2.93281	0.0323011	0.0594168	3.01972e-05
O08848	RO60	60 kDa SS-A/Ro ribonucleoprotein	RO60_MOUSE	2.95053	0.0323742	0.0595113	1.94646e-05
P62874	Gnb1	Guanine nucleotide-binding protein G(I)/G(S)/G(T) subunit beta-1	GBB1_MOUSE	3.25064	0.0325032	0.0597086	0.000109642
P15105	Glul	Glutamine synthetase	GLNA_MOUSE	1.32239	0.032533	0.0597235	0.000172976
Q9CWS0	Ddah1	N(G),N(G)-dimethylarginine dimethylaminohydrolase 1	DDAH1_MOUSE	2.83531	0.0326306	0.0598627	3.01646e-05
Q8JZK9	Hmgcs1	Hydroxymethylglutaryl-CoA synthase, cytoplasmic	HMCS1_MOUSE	2.91368	0.0326584	0.0598737	2.59076e-05
P47754	Capza2	F-actin-capping protein subunit alpha-2	CAZA2_MOUSE	3.30866	0.0327067	0.0599224	0.000157218
Q9R1P3	Psmb2	Proteasome subunit beta type-2	PSB2_MOUSE	0.64784	0.0329569	0.0603406	4.7132e-05
Q9Z1B3	Plcb1	1-phosphatidylinositol 4,5-bisphosphate phosphodiesterase beta-1	PLCB1_MOUSE	3.56068	0.0332077	0.0607593	6.94791e-05
Q80TL4	Phf24	PHD finger protein 24	PHF24_MOUSE	3.3115	0.0332765	0.0608446	3.85416e-05
Q9JM13	Rabgef1	Rab5 GDP/GTP exchange factor	RABX5_MOUSE	3.00804	0.0333468	0.0609327	4.7067e-05
P19157	Gstp1	Glutathione S-transferase P 1	GSTP1_MOUSE	3.58016	0.0334206	0.061027	0.000125009
Q61937	Npm1	Nucleophosmin	NPM_MOUSE	1.21976	0.0337851	0.0616517	5.38554e-05
P19536	Cox5b	Cytochrome c oxidase subunit 5B, mitochondrial	COX5B_MOUSE	3.51804	0.0338591	0.0617457	0.000107504
P10637-3;P10637-4	Mapt	Isoform Tau-B of Microtubule-associated protein tau;Isoform Tau-C of Microtubule-associated protein tau	TAU_MOUSE	3.87725	0.0341713	0.0622738	0.000225052
Q9R0Q6	Arpc1a	Actin-related protein 2/3 complex subunit 1A	ARC1A_MOUSE	1.73565	0.0342831	0.0624362	5.49519e-05
Q62376;Q62376-2	Snrnp70	U1 small nuclear ribonucleoprotein 70 kDa;Isoform 2 of U1 small nuclear ribonucleoprotein 70 kDa	RU17_MOUSE	2.11788	0.0344143	0.0626336	2.7325e-05
Q9CQI6	Cotl1	Coactosin-like protein	COTL1_MOUSE	3.18072	0.0346202	0.0629666	5.92548e-05
P39688	Fyn	Tyrosine-protein kinase Fyn	FYN_MOUSE	2.82613	0.034688	0.0630482	2.72831e-05
P56695	Wfs1	Wolframin	WFS1_MOUSE	2.49272	0.0348555	0.0632954	8.305e-06
Q9R1T4;Q9R1T4-2;Q9R1T4-3	Septin6	Septin-6;Isoform I of Septin-6;Isoform V of Septin-6	SEPT6_MOUSE	1.23374	0.0348909	0.0632954	4.64642e-05
Q99LF4	Rtcb	RNA-splicing ligase RtcB homolog	RTCB_MOUSE	2.97511	0.034893	0.0632954	5.82262e-05
P25444	Rps2	40S ribosomal protein S2	RS2_MOUSE	1.30418	0.0350092	0.0634643	0.000240621
Q920I9	Wdr7	WD repeat-containing protein 7	WDR7_MOUSE	2.75487	0.0352997	0.0639487	2.98326e-05
P17809	Slc2a1	Solute carrier family 2, facilitated glucose transporter member 1	GTR1_MOUSE	0.950928	0.0354774	0.0642283	7.88537e-05
Q9JIZ9	Plscr3	Phospholipid scramblase 3	PLS3_MOUSE	2.79409	0.0359038	0.0649575	3.36254e-05
P61329;P61329-2	Fgf12	Fibroblast growth factor 12;Isoform 2 of Fibroblast growth factor 12	FGF12_MOUSE	2.76307	0.0362831	0.0656006	3.62284e-05
Q5DTL9;Q5DTL9-2;Q5DTL9-3;Q5DTL9-4	Slc4a10	Sodium-driven chloride bicarbonate exchanger;Isoform 2 of Sodium-driven chloride bicarbonate exchanger;Isoform 3 of Sodium-driven chloride bicarbonate exchanger;Isoform 4 of Sodium-driven chloride bicarbonate exchanger	S4A10_MOUSE	1.47673	0.0371546	0.0671321	7.18514e-05
P15532	Nme1	Nucleoside diphosphate kinase A	NDKA_MOUSE	2.94326	0.0372501	0.0672338	4.7244e-05
P08414	Camk4	Calcium/calmodulin-dependent protein kinase type IV	KCC4_MOUSE	2.88357	0.0372598	0.0672338	3.8603e-05
Q8R0W0	Eppk1	Epiplakin	EPIPL_MOUSE	2.64525	0.0375852	0.0677766	3.14664e-05
P49312	Hnrnpa1	Heterogeneous nuclear ribonucleoprotein A1	ROA1_MOUSE	3.54358	0.0376858	0.0679135	0.000147489
Q91VD9	Ndufs1	NADH-ubiquinone oxidoreductase 75 kDa subunit, mitochondrial	NDUS1_MOUSE	1.21976	0.0378171	0.0680959	8.66181e-05
Q99KU0	Vmp1	Vacuole membrane protein 1	VMP1_MOUSE	2.55561	0.0378366	0.0680959	1.20589e-05
Q8K596;Q8K596-2	Slc8a2	Sodium/calcium exchanger 2;Isoform 2 of Sodium/calcium exchanger 2	NAC2_MOUSE	1.84175	0.0381823	0.0686733	2.79556e-05
P14869	Rplp0	60S acidic ribosomal protein P0	RLA0_MOUSE	2.62181	0.0383458	0.0689222	2.57739e-05
Q9CQZ5	Ndufa6	NADH dehydrogenase [ubiquinone] 1 alpha subcomplex subunit 6	NDUA6_MOUSE	2.46136	0.0383788	0.0689364	9.19622e-06
Q8JZU2	Slc25a1	Tricarboxylate transport protein, mitochondrial	TXTP_MOUSE	2.56376	0.0384726	0.0690107	1.45474e-05
Q9Z1N5	Ddx39b	Spliceosome RNA helicase Ddx39b	DX39B_MOUSE	3.02268	0.038495	0.0690107	4.90535e-05
Q8BGQ7	Aars1	Alanine--tRNA ligase, cytoplasmic	SYAC_MOUSE	3.62942	0.0384954	0.0690107	0.000110492
P40336;P40336-2	Vps26a	Vacuolar protein sorting-associated protein 26A;Isoform 2 of Vacuolar protein sorting-associated protein 26A	VP26A_MOUSE	2.7188	0.038917	0.0697211	2.96001e-05
P62270	Rps18	40S ribosomal protein S18	RS18_MOUSE	1.07219	0.0392104	0.0702009	0.000149564
P62835	Rap1a	Ras-related protein Rap-1A	RAP1A_MOUSE	3.18175	0.0393111	0.0703354	7.72804e-05
P68040	Rack1	Receptor of activated protein C kinase 1	RACK1_MOUSE	3.4736	0.0396046	0.0708145	9.04059e-05
P24527	Lta4h	Leukotriene A-4 hydrolase	LKHA4_MOUSE	2.64726	0.0397791	0.0710803	2.68212e-05
Q9ES97;Q9ES97-2	Rtn3	Reticulon-3;Isoform 2 of Reticulon-3	RTN3_MOUSE	1.39419	0.040182	0.0717536	0.000127285
Q9CZ30	Ola1	Obg-like ATPase 1	OLA1_MOUSE	2.92455	0.0405389	0.072344	5.0621e-05
Q8R3Q0	Saraf	Store-operated calcium entry-associated regulatory factor	SARAF_MOUSE	2.93271	0.0408528	0.0728568	2.89389e-05
P47962	Rpl5	60S ribosomal protein L5	RL5_MOUSE	2.63964	0.0410608	0.0731803	5.22101e-05
Q8R1I1	Uqcr10	Cytochrome b-c1 complex subunit 9	QCR9_MOUSE	2.53664	0.0412714	0.073508	2.69706e-05
Q9CZW4	Acsl3	Long-chain-fatty-acid--CoA ligase 3	ACSL3_MOUSE	3.42499	0.0413525	0.0736048	8.19934e-05
O08997	Atox1	Copper transport protein ATOX1	ATOX1_MOUSE	2.5117	0.0417956	0.0743453	2.28175e-05
Q7M729	Scn4b	Sodium channel subunit beta-4	SCN4B_MOUSE	2.94622	0.041933	0.0745415	5.98415e-05
Q9JHU9	Isyna1	Inositol-3-phosphate synthase 1	INO1_MOUSE	2.45344	0.0422858	0.0751202	1.93271e-05
Q01768	Nme2	Nucleoside diphosphate kinase B	NDKB_MOUSE	2.06023	0.0423307	0.0751365	9.57355e-05
P53026	Rpl10a	60S ribosomal protein L10a	RL10A_MOUSE	2.85891	0.0423497	0.0751365	0.000102043
Q9JJK2	Lancl2	LanC-like protein 2	LANC2_MOUSE	3.02206	0.0425726	0.0754833	4.15315e-05
P61750	Arf4	ADP-ribosylation factor 4	ARF4_MOUSE	2.50657	0.0427434	0.0756899	2.97218e-05
Q8R127	Sccpdh	Saccharopine dehydrogenase-like oxidoreductase	SCPDL_MOUSE	2.77823	0.0427441	0.0756899	4.31338e-05
Q8VBZ3	Clptm1	Cleft lip and palate transmembrane protein 1 homolog	CLPT1_MOUSE	2.60307	0.0428672	0.0758589	1.45212e-05
P61961	Ufm1	Ubiquitin-fold modifier 1	UFM1_MOUSE	2.5746	0.0432773	0.0765354	1.61795e-05
P48036	Anxa5	Annexin A5	ANXA5_MOUSE	3.2001	0.0439856	0.0777381	8.11789e-05
Q8BPN8;Q8BPN8-2	Dmxl2	DmX-like protein 2;Isoform 2 of DmX-like protein 2	DMXL2_MOUSE	1.90799	0.0441246	0.0779336	5.91347e-05
P45376	Akr1b1	Aldo-keto reductase family 1 member B1	ALDR_MOUSE	2.89694	0.0446098	0.07874	5.66283e-05
Q69ZW3;Q69ZW3-2	Ehbp1	EH domain-binding protein 1;Isoform 2 of EH domain-binding protein 1	EHBP1_MOUSE	-1.23411	0.0453335	0.079952	0.000361254
Q9D1D4	Tmed10	Transmembrane emp24 domain-containing protein 10	TMEDA_MOUSE	2.24612	0.0453546	0.079952	9.05639e-06
Q9CY27	Tecr	Very-long-chain enoyl-CoA reductase	TECR_MOUSE	1.6287	0.0454421	0.0800549	6.31415e-05
P52760	Rida	2-iminobutanoate/2-iminopropanoate deaminase	RIDA_MOUSE	2.3382	0.0455914	0.0802666	1.53225e-05
P59328;P59328-2;P59328-3	Wdhd1	WD repeat and HMG-box DNA-binding protein 1;Isoform 2 of WD repeat and HMG-box DNA-binding protein 1;Isoform 3 of WD repeat and HMG-box DNA-binding protein 1	WDHD1_MOUSE	-0.710435	0.04593	0.0808109	0.0366464
P62281	Rps11	40S ribosomal protein S11	RS11_MOUSE	1.34712	0.0459618	0.0808152	5.10028e-05
Q63810;Q63810-2	Ppp3r1	Calcineurin subunit B type 1;Isoform 2 of Calcineurin subunit B type 1	CANB1_MOUSE	3.16247	0.0466918	0.0820462	0.00010908
Q9CZ13	Uqcrc1	Cytochrome b-c1 complex subunit 1, mitochondrial	QCR1_MOUSE	1.08946	0.0470221	0.0825739	5.5781e-05
P56564	Slc1a3	Excitatory amino acid transporter 1	EAA1_MOUSE	1.11573	0.0473214	0.0830464	8.99285e-05
Q925N0	Sfxn5	Sideroflexin-5	SFXN5_MOUSE	2.85574	0.0479249	0.0840171	6.83047e-05
Q149L6	Dnajb14	DnaJ homolog subfamily B member 14	DJB14_MOUSE	2.62812	0.0479518	0.0840171	2.03896e-05
P08228	Sod1	Superoxide dismutase [Cu-Zn]	SODC_MOUSE	2.2997	0.0479661	0.0840171	2.99159e-05
Q9QYS2	Grm3	Metabotropic glutamate receptor 3	GRM3_MOUSE	2.34306	0.0479986	0.0840204	2.07883e-05
Q8BFR5	Tufm	Elongation factor Tu, mitochondrial	EFTU_MOUSE	1.2433	0.048196	0.0843124	6.562e-05
Q6IRU2	Tpm4	Tropomyosin alpha-4 chain	TPM4_MOUSE	2.27384	0.0492475	0.0860971	3.25361e-05
Q8K2B3	Sdha	Succinate dehydrogenase [ubiquinone] flavoprotein subunit, mitochondrial	SDHA_MOUSE	1.00647	0.0494803	0.0864491	5.22618e-05
Q9CR16	Ppid	Peptidyl-prolyl cis-trans isomerase D	PPID_MOUSE	3.23125	0.0497592	0.0868812	0.000155712
Q8BK08	Tmem11	Transmembrane protein 11, mitochondrial	TMM11_MOUSE	3.14064	0.0498461	0.0869777	7.74223e-05
Q9WUA2	Farsb	Phenylalanine--tRNA ligase beta subunit	SYFB_MOUSE	2.38218	0.0501008	0.0873667	2.31849e-05
Q61792	Lasp1	LIM and SH3 domain protein 1	LASP1_MOUSE	3.31276	0.0504076	0.0878459	0.000144435
Q9DCP2	Slc38a3	Sodium-coupled neutral amino acid transporter 3	S38A3_MOUSE	2.73949	0.0505513	0.0880405	3.0213e-05
Q8C419	Gpr158	Probable G-protein coupled receptor 158	GP158_MOUSE	2.87611	0.0511022	0.0889436	7.87558e-05
Q61187	Tsg101	Tumor susceptibility gene 101 protein	TS101_MOUSE	2.25612	0.0511678	0.0890015	7.40484e-05
Q3UPL0	Sec31a	Protein transport protein Sec31A	SC31A_MOUSE	2.65344	0.0512259	0.0890463	5.59584e-05
Q9JJZ2	Tuba8	Tubulin alpha-8 chain	TBA8_MOUSE	3.85062	0.0517196	0.0898478	0.000517159
Q02105	C1qc	Complement C1q subcomponent subunit C	C1QC_MOUSE	2.76714	0.0518314	0.089985	3.21002e-05
Q8C0M9	Asrgl1	Isoaspartyl peptidase/L-asparaginase	ASGL1_MOUSE	1.13154	0.0521044	0.0903741	6.77854e-05
P61205;P84078	Arf3;Arf1	ADP-ribosylation factor 3;ADP-ribosylation factor 1	ARF3_MOUSE;ARF1_MOUSE	2.93044	0.0521421	0.0903741	0.000161291
P70663	Sparcl1	SPARC-like protein 1	SPRL1_MOUSE	2.52096	0.0521752	0.0903741	3.8379e-05
P56812	Pdcd5	Programmed cell death protein 5	PDCD5_MOUSE	2.18297	0.052187	0.0903741	4.20032e-05
Q9QZ08	Nagk	N-acetyl-D-glucosamine kinase	NAGK_MOUSE	2.92203	0.0522746	0.0904689	5.46256e-05
Q921M7	Cyrib	CYFIP-related Rac1 interactor B	CYRIB_MOUSE	2.78225	0.0524497	0.0907148	3.80882e-05
P14152	Mdh1	Malate dehydrogenase, cytoplasmic	MDHC_MOUSE	1.14603	0.0526096	0.0909343	0.000174653
Q9D328	Tmem35a	Transmembrane protein 35A	TM35A_MOUSE	2.18193	0.0528656	0.0913194	6.54435e-05
P61089	Ube2n	Ubiquitin-conjugating enzyme E2 N	UBE2N_MOUSE	2.82292	0.0530028	0.0914989	7.20407e-05
Q8VIJ6	Sfpq	Splicing factor, proline- and glutamine-rich	SFPQ_MOUSE	2.89694	0.0532603	0.0918858	8.68587e-05
Q5U3K5	Rabl6	Rab-like protein 6	RABL6_MOUSE	2.12827	0.0533144	0.0919213	1.44079e-05
O88643	Pak1	Serine/threonine-protein kinase PAK 1	PAK1_MOUSE	3.00623	0.054281	0.0935293	0.000108588
O35295	Purb	Transcriptional activator protein Pur-beta	PURB_MOUSE	2.77682	0.0544693	0.093795	6.45444e-05
Q7TPD3	Robo2	Roundabout homolog 2	ROBO2_MOUSE	2.51963	0.0545405	0.0938589	2.32498e-05
Q6R891	Ppp1r9b	Neurabin-2	NEB2_MOUSE	-1.53867	0.0548261	0.0942913	0.00378605
O08917	Flot1	Flotillin-1	FLOT1_MOUSE	-1.93332	0.0548894	0.0943412	0.000638846
Q8BXR1	Slc7a14	Probable cationic amino acid transporter	S7A14_MOUSE	1.32145	0.0550481	0.0945549	1.49443e-05
P01899	H2-D1	H-2 class I histocompatibility antigen, D-B alpha chain	HA11_MOUSE	2.98948	0.0561505	0.0963882	1.46901e-05
P61148	Fgf1	Fibroblast growth factor 1	FGF1_MOUSE	inf	0.0562727	0.0965376	1.18771e-05
Q60692	Psmb6	Proteasome subunit beta type-6	PSB6_MOUSE	0.625617	0.0567785	0.0966099	4.72413e-05
Q8K012;Q8K012-2	Fnbp1l	Formin-binding protein 1-like;Isoform 2 of Formin-binding protein 1-like	FBP1L_MOUSE	inf	0.0577002	0.0966099	2.80083e-06
Q9Z1K6	Arih2	E3 ubiquitin-protein ligase ARIH2	ARI2_MOUSE	inf	0.0577117	0.0966099	3.11962e-06
Q64520;Q64520-2	Guk1	Guanylate kinase;Isoform 2 of Guanylate kinase	KGUA_MOUSE	inf	0.0577176	0.0966099	9.38927e-06
P97318;P97318-2;P97318-3;P97318-4;P97318-5;P97318-6;P97318-8	Dab1	Disabled homolog 1;Isoform DAB555 of Disabled homolog 1;Isoform DAB271 of Disabled homolog 1;Isoform DAB197 of Disabled homolog 1;Isoform DAB204 of Disabled homolog 1;Isoform DAB217 of Disabled homolog 1;Isoform DAB553 of Disabled homolog 1	DAB1_MOUSE	inf	0.0577499	0.0966099	9.1097e-06
Q91X96	Rabif	Guanine nucleotide exchange factor MSS4	MSS4_MOUSE	inf	0.0577932	0.0966099	8.58486e-06
P51830	Adcy9	Adenylate cyclase type 9	ADCY9_MOUSE	inf	0.0577998	0.0966099	3.7345e-06
P22723;P22723-2	Gabrg2	Gamma-aminobutyric acid receptor subunit gamma-2;Isoform 2S of Gamma-aminobutyric acid receptor subunit gamma-2	GBRG2_MOUSE	2.72299	0.0578157	0.0966099	4.47791e-05
P70399;P70399-5	Tp53bp1	TP53-binding protein 1;Isoform 2 of TP53-binding protein 1	TP53B_MOUSE	inf	0.0578534	0.0966099	8.41001e-06
Q8CI61	Bag4	BAG family molecular chaperone regulator 4	BAG4_MOUSE	inf	0.0578679	0.0966099	1.09337e-05
Q78YZ6;Q78YZ6-2;Q78YZ6-3	Scoc	Short coiled-coil protein;Isoform 2 of Short coiled-coil protein;Isoform 3 of Short coiled-coil protein	SCOC_MOUSE	inf	0.05787	0.0966099	8.60012e-06
Q3U7R1;Q3U7R1-2	Esyt1	Extended synaptotagmin-1;Isoform 2 of Extended synaptotagmin-1	ESYT1_MOUSE	inf	0.0578733	0.0966099	1.31434e-05
P54822	Adsl	Adenylosuccinate lyase	PUR8_MOUSE	inf	0.0578887	0.0966099	8.44514e-06
Q3TDN2;Q3TDN2-2	Faf2	FAS-associated factor 2;Isoform 2 of FAS-associated factor 2	FAF2_MOUSE	inf	0.0579146	0.0966099	2.15331e-05
Q9D051	Pdhb	Pyruvate dehydrogenase E1 component subunit beta, mitochondrial	ODPB_MOUSE	0.958004	0.0579313	0.0966099	7.74794e-05
Q99M51	Nck1	Cytoplasmic protein NCK1	NCK1_MOUSE	inf	0.0579622	0.0966099	4.76892e-06
Q69ZS7;Q69ZS7-2	Hbs1l	HBS1-like protein;Isoform 2 of HBS1-like protein	HBS1L_MOUSE	inf	0.0580109	0.0966099	3.64557e-06
Q8C7D2;Q8C7D2-2;Q8C7D2-3	Crbn	Protein cereblon;Isoform 2 of Protein cereblon;Isoform 3 of Protein cereblon	CRBN_MOUSE	inf	0.0580293	0.0966099	1.33387e-05
Q8BRF7;Q8BRF7-3	Scfd1	Sec1 family domain-containing protein 1;Isoform 3 of Sec1 family domain-containing protein 1	SCFD1_MOUSE	inf	0.0580367	0.0966099	2.36519e-06
Q8BH57;Q8BH57-2	Wdr48	WD repeat-containing protein 48;Isoform 2 of WD repeat-containing protein 48	WDR48_MOUSE	inf	0.0580736	0.0966099	5.97902e-06
P16388	Kcna1	Potassium voltage-gated channel subfamily A member 1	KCNA1_MOUSE	inf	0.0580789	0.0966099	1.43314e-05
P70265	Pfkfb2	6-phosphofructo-2-kinase/fructose-2,6-bisphosphatase 2	F262_MOUSE	inf	0.058101	0.0966099	1.03647e-05
Q8K245	Uvrag	UV radiation resistance-associated protein	UVRAG_MOUSE	inf	0.0581012	0.0966099	1.21174e-05
Q8K353	Cystm1	Cysteine-rich and transmembrane domain-containing protein 1	CYTM1_MOUSE	inf	0.058102	0.0966099	1.28295e-05
Q9D8W5	Psmd12	26S proteasome non-ATPase regulatory subunit 12	PSD12_MOUSE	inf	0.058106	0.0966099	1.29551e-05
Q8CGK7	Gnal	Guanine nucleotide-binding protein G(olf) subunit alpha	GNAL_MOUSE	inf	0.0581092	0.0966099	1.937e-05
Q8R123;Q8R123-2	Flad1	FAD synthase;Isoform 2 of FAD synthase	FAD1_MOUSE	inf	0.0581102	0.0966099	8.10472e-06
Q8C3F2;Q8C3F2-2;Q8C3F2-3	Fam120c	Constitutive coactivator of PPAR-gamma-like protein 2;Isoform 2 of Constitutive coactivator of PPAR-gamma-like protein 2;Isoform 3 of Constitutive coactivator of PPAR-gamma-like protein 2	F120C_MOUSE	inf	0.0581137	0.0966099	3.04001e-05
Q9EPK2;Q9EPK2-2;Q9EPK2-3;Q9EPK2-4	Rp2	Protein XRP2;Isoform 2 of Protein XRP2;Isoform 3 of Protein XRP2;Isoform 4 of Protein XRP2	XRP2_MOUSE	inf	0.0581203	0.0966099	4.29407e-06
Q8BH60;Q8BH60-2	Gopc	Golgi-associated PDZ and coiled-coil motif-containing protein;Isoform 2 of Golgi-associated PDZ and coiled-coil motif-containing protein	GOPC_MOUSE	inf	0.0581259	0.0966099	5.68281e-06
Q9D3D0	Ttpal	Alpha-tocopherol transfer protein-like	TTPAL_MOUSE	inf	0.0581259	0.0966099	2.77209e-06
Q80V91	Dtx3	Probable E3 ubiquitin-protein ligase DTX3	DTX3_MOUSE	inf	0.0581442	0.0966099	6.62418e-06
Q9D8S3	Arfgap3	ADP-ribosylation factor GTPase-activating protein 3	ARFG3_MOUSE	inf	0.0581595	0.0966099	2.92052e-06
Q8VCD6	Reep2	Receptor expression-enhancing protein 2	REEP2_MOUSE	inf	0.0581619	0.0966099	3.1742e-05
Q9QZB1	Rgs20	Regulator of G-protein signaling 20	RGS20_MOUSE	inf	0.0582107	0.0966099	1.19711e-05
Q99LD8	Ddah2	N(G),N(G)-dimethylarginine dimethylaminohydrolase 2	DDAH2_MOUSE	inf	0.0582401	0.0966099	4.57359e-06
Q64737	Gart	Trifunctional purine biosynthetic protein adenosine-3	PUR2_MOUSE	inf	0.0582409	0.0966099	9.62726e-06
Q8VHW2	Cacng8	Voltage-dependent calcium channel gamma-8 subunit	CCG8_MOUSE	inf	0.0582492	0.0966099	5.82358e-06
Q8BHK2	Scn3b	Sodium channel subunit beta-3	SCN3B_MOUSE	inf	0.0582578	0.0966099	2.05817e-05
P55288	Cdh11	Cadherin-11	CAD11_MOUSE	inf	0.0582818	0.0966099	7.27012e-06
Q9CVB6	Arpc2	Actin-related protein 2/3 complex subunit 2	ARPC2_MOUSE	1.97844	0.0583015	0.0966099	2.88055e-05
Q8CAY6	Acat2	Acetyl-CoA acetyltransferase, cytosolic	THIC_MOUSE	1.03639	0.0583126	0.0966099	5.01616e-05
Q80U04;Q80U04-2	Pja2	E3 ubiquitin-protein ligase Praja-2;Isoform 2 of E3 ubiquitin-protein ligase Praja-2	PJA2_MOUSE	inf	0.058316	0.0966099	1.23533e-05
P61079;P62838	Ube2d3;Ube2d2	Ubiquitin-conjugating enzyme E2 D3;Ubiquitin-conjugating enzyme E2 D2	UB2D3_MOUSE;UB2D2_MOUSE	inf	0.0583258	0.0966099	1.69033e-05
Q9JME7	Trappc2l	Trafficking protein particle complex subunit 2-like protein	TPC2L_MOUSE	inf	0.0583298	0.0966099	8.45176e-06
Q91YJ2	Snx4	Sorting nexin-4	SNX4_MOUSE	inf	0.0583395	0.0966099	5.80238e-06
P63158	Hmgb1	High mobility group protein B1	HMGB1_MOUSE	inf	0.0583617	0.0966099	3.76106e-06
Q8VDM4	Psmd2	26S proteasome non-ATPase regulatory subunit 2	PSMD2_MOUSE	2.58074	0.0583658	0.0966099	3.16785e-05
Q6ZQM8	Ugt1a7c	UDP-glucuronosyltransferase 1-7C	UD17C_MOUSE	inf	0.0583917	0.0966099	6.06655e-05
P59017	Bcl2l13	Bcl-2-like protein 13	B2L13_MOUSE	inf	0.0584193	0.0966099	1.0463e-05
Q3UJD6;Q3UJD6-2	Usp19	Ubiquitin carboxyl-terminal hydrolase 19;Isoform 2 of Ubiquitin carboxyl-terminal hydrolase 19	UBP19_MOUSE	inf	0.0584558	0.0966099	6.86428e-06
Q8BRK8	Prkaa2	5'-AMP-activated protein kinase catalytic subunit alpha-2	AAPK2_MOUSE	inf	0.0584654	0.0966099	2.1753e-06
Q8VD37	Sgip1	SH3-containing GRB2-like protein 3-interacting protein 1	SGIP1_MOUSE	inf	0.0584963	0.0966099	7.69279e-06
Q9D1F4	Akt1s1	Proline-rich AKT1 substrate 1	AKTS1_MOUSE	inf	0.058513	0.0966099	7.45985e-06
P62075	Timm13	Mitochondrial import inner membrane translocase subunit Tim13	TIM13_MOUSE	inf	0.0585257	0.0966099	8.3841e-06
P70206	Plxna1	Plexin-A1	PLXA1_MOUSE	inf	0.0585554	0.0966099	6.8565e-06
A2A8Z1;A2A8Z1-2	Osbpl9	Oxysterol-binding protein-related protein 9;Isoform 2 of Oxysterol-binding protein-related protein 9	OSBL9_MOUSE	inf	0.0585566	0.0966099	8.843e-06
Q641K1;Q641K1-2;Q641K1-3;Q641K1-4;Q641K1-5	Agtpbp1	Cytosolic carboxypeptidase 1;Isoform 2 of Cytosolic carboxypeptidase 1;Isoform 3 of Cytosolic carboxypeptidase 1;Isoform 4 of Cytosolic carboxypeptidase 1;Isoform 5 of Cytosolic carboxypeptidase 1	CBPC1_MOUSE	inf	0.0585801	0.0966099	4.67818e-06
Q8BI84	Mia3	Transport and Golgi organization protein 1 homolog	TGO1_MOUSE	inf	0.0585863	0.0966099	6.16791e-06
Q9DC63;Q9DC63-2;Q9DC63-3	Fbxo3	F-box only protein 3;Isoform 2 of F-box only protein 3;Isoform 3 of F-box only protein 3	FBX3_MOUSE	inf	0.0586396	0.0966099	6.43675e-06
P24547	Impdh2	Inosine-5'-monophosphate dehydrogenase 2	IMDH2_MOUSE	2.73171	0.0586708	0.0966099	6.73755e-05
Q91XD7	Creld1	Protein disulfide isomerase Creld1	CREL1_MOUSE	inf	0.0587394	0.0966099	4.86248e-06
P80560	Ptprn2	Receptor-type tyrosine-protein phosphatase N2	PTPR2_MOUSE	inf	0.0587486	0.0966099	6.94947e-06
Q2M3X8;Q2M3X8-2;Q2M3X8-3;Q2M3X8-4;Q501J7;Q501J7-2;Q501J7-3	Phactr1;Phactr1;Phactr1;Phactr1;Phactr4;Phactr4;Phactr4	Phosphatase and actin regulator 1;Isoform 2 of Phosphatase and actin regulator 1;Isoform 3 of Phosphatase and actin regulator 1;Isoform 4 of Phosphatase and actin regulator 1;Phosphatase and actin regulator 4;Isoform 2 of Phosphatase and actin regulator 4;Isoform 3 of Phosphatase and actin regulator 4	PHAR1_MOUSE;PHAR1_MOUSE;PHAR1_MOUSE;PHAR1_MOUSE;PHAR4_MOUSE;PHAR4_MOUSE;PHAR4_MOUSE	inf	0.058792	0.0966099	1.0221e-05
P69566	Ranbp9	Ran-binding protein 9	RANB9_MOUSE	inf	0.0588068	0.0966099	1.53023e-05
Q6PGB6;Q6PGB6-2;Q6PGB6-3;Q6PGB6-4;Q6PGB6-5	Naa50	N-alpha-acetyltransferase 50;Isoform 2 of N-alpha-acetyltransferase 50;Isoform 3 of N-alpha-acetyltransferase 50;Isoform 4 of N-alpha-acetyltransferase 50;Isoform 5 of N-alpha-acetyltransferase 50	NAA50_MOUSE	inf	0.0588338	0.0966099	6.06728e-06
Q9WTX2	Prkra	Interferon-inducible double-stranded RNA-dependent protein kinase activator A	PRKRA_MOUSE	inf	0.058847	0.0966099	8.51658e-06
Q640R3	Hepacam	Hepatocyte cell adhesion molecule	HECAM_MOUSE	2.337	0.058865	0.0966099	1.61477e-05
Q9EQQ2	Yipf5	Protein YIPF5	YIPF5_MOUSE	inf	0.0589277	0.0966099	3.4754e-06
A2AQ25;A2AQ25-2;A2AQ25-3;A2AQ25-4;A2AQ25-5;A2AQ25-6;A2AQ25-8;A2AQ25-9	Skt	Sickle tail protein;Isoform 2 of Sickle tail protein;Isoform 3 of Sickle tail protein;Isoform 4 of Sickle tail protein;Isoform 5 of Sickle tail protein;Isoform 6 of Sickle tail protein;Isoform 8 of Sickle tail protein;Isoform 9 of Sickle tail protein	SKT_MOUSE	inf	0.0589283	0.0966099	3.22953e-06
Q80WQ2	Vac14	Protein VAC14 homolog	VAC14_MOUSE	inf	0.0589734	0.0966099	6.25867e-06
Q9D772	Fam219a	Protein FAM219A	F219A_MOUSE	inf	0.058993	0.0966099	4.68327e-06
Q91WC3	Acsl6	Long-chain-fatty-acid--CoA ligase 6	ACSL6_MOUSE	1.41946	0.0590022	0.0966099	5.90173e-05
P97445	Cacna1a	Voltage-dependent P/Q-type calcium channel subunit alpha-1A	CAC1A_MOUSE	inf	0.0590275	0.0966099	5.43973e-06
Q8R105	Vps37c	Vacuolar protein sorting-associated protein 37C	VP37C_MOUSE	inf	0.0590842	0.0966099	8.32612e-06
Q6DFV3	Arhgap21	Rho GTPase-activating protein 21	RHG21_MOUSE	inf	0.0591179	0.0966099	7.20567e-06
Q9CXX9	Cuedc2	CUE domain-containing protein 2	CUED2_MOUSE	inf	0.0591202	0.0966099	7.93435e-06
Q3UHD9;Q3UHD9-2	Agap2	Arf-GAP with GTPase, ANK repeat and PH domain-containing protein 2;Isoform 2 of Arf-GAP with GTPase, ANK repeat and PH domain-containing protein 2	AGAP2_MOUSE	inf	0.0591468	0.0966099	5.11769e-06
Q5SP85;Q5SP85-2	Ccdc85a	Coiled-coil domain-containing protein 85A;Isoform 2 of Coiled-coil domain-containing protein 85A	CC85A_MOUSE	inf	0.0591582	0.0966099	2.66463e-06
Q505F5	Lrrc47	Leucine-rich repeat-containing protein 47	LRC47_MOUSE	inf	0.0592596	0.0966099	8.10088e-06
Q99J77	Nans	Sialic acid synthase	SIAS_MOUSE	inf	0.0593313	0.0966099	6.24298e-06
Q62523	Zyx	Zyxin	ZYX_MOUSE	inf	0.059344	0.0966099	9.66862e-06
Q9D1C8	Vps28	Vacuolar protein sorting-associated protein 28 homolog	VPS28_MOUSE	inf	0.0593932	0.0966099	5.8109e-06
Q8CC35;Q8CC35-2;Q8CC35-3	Synpo	Synaptopodin;Isoform 2 of Synaptopodin;Isoform 3 of Synaptopodin	SYNPO_MOUSE	inf	0.0593964	0.0966099	6.34575e-06
Q9DCJ1	Mlst8	Target of rapamycin complex subunit LST8	LST8_MOUSE	inf	0.0594244	0.0966099	2.83001e-06
Q8BX70;Q8BX70-2;Q8BX70-3	Vps13c	Vacuolar protein sorting-associated protein 13C;Isoform 2 of Vacuolar protein sorting-associated protein 13C;Isoform 3 of Vacuolar protein sorting-associated protein 13C	VP13C_MOUSE	inf	0.0594529	0.0966099	5.09361e-06
Q8BHE3	Atcay	Caytaxin	ATCAY_MOUSE	inf	0.0595022	0.0966099	7.3243e-06
Q9CXF4	Tbc1d15	TBC1 domain family member 15	TBC15_MOUSE	inf	0.0595504	0.0966099	4.32831e-06
Q8K4P8;Q8K4P8-2;Q8K4P8-3;Q8K4P8-4	Hecw1	E3 ubiquitin-protein ligase HECW1;Isoform 2 of E3 ubiquitin-protein ligase HECW1;Isoform 3 of E3 ubiquitin-protein ligase HECW1;Isoform 4 of E3 ubiquitin-protein ligase HECW1	HECW1_MOUSE	inf	0.0595561	0.0966099	2.22876e-06
P16283	Slc4a3	Anion exchange protein 3	B3A3_MOUSE	inf	0.059594	0.0966099	7.34962e-06
P98086	C1qa	Complement C1q subcomponent subunit A	C1QA_MOUSE	inf	0.0596243	0.0966099	0.00013636
Q91Y86	Mapk8	Mitogen-activated protein kinase 8	MK08_MOUSE	inf	0.0596438	0.0966099	5.59277e-06
Q80XP9;Q80XP9-2	Wnk3	Serine/threonine-protein kinase WNK3;Isoform 2 of Serine/threonine-protein kinase WNK3	WNK3_MOUSE	inf	0.0597175	0.0966099	5.60853e-06
P15508	Sptb	Spectrin beta chain, erythrocytic	SPTB1_MOUSE	inf	0.0597553	0.0966099	5.3109e-06
Q9DCR2	Ap3s1	AP-3 complex subunit sigma-1	AP3S1_MOUSE	inf	0.0597611	0.0966099	4.91518e-06
P56546;P56546-2	Ctbp2	C-terminal-binding protein 2;Isoform 2 of C-terminal-binding protein 2	CTBP2_MOUSE	inf	0.059807	0.0966099	3.82566e-06
P98084	Apba2	Amyloid-beta A4 precursor protein-binding family A member 2	APBA2_MOUSE	inf	0.0598683	0.0966099	7.38987e-06
Q6PGH2	Jpt2	Jupiter microtubule associated homolog 2	JUPI2_MOUSE	inf	0.0598826	0.0966099	6.92975e-06
Q61315	Apc	Adenomatous polyposis coli protein	APC_MOUSE	inf	0.059885	0.0966099	3.12761e-06
Q99PL5	Rrbp1	Ribosome-binding protein 1	RRBP1_MOUSE	inf	0.0599032	0.0966099	6.50514e-06
Q6P2B1;Q6P2B1-2	Tnpo3	Transportin-3;Isoform 2 of Transportin-3	TNPO3_MOUSE	inf	0.0599373	0.0966099	6.1166e-06
Q9JKB1	Uchl3	Ubiquitin carboxyl-terminal hydrolase isozyme L3	UCHL3_MOUSE	inf	0.0599671	0.0966099	5.52599e-06
Q9CZH7	Mxra7	Matrix-remodeling-associated protein 7	MXRA7_MOUSE	inf	0.0599825	0.0966099	7.11091e-06
Q9ET26	Rnf114	E3 ubiquitin-protein ligase RNF114	RN114_MOUSE	inf	0.0599914	0.0966099	1.10167e-05
P47791;P47791-2	Gsr	Glutathione reductase, mitochondrial;Isoform Cytoplasmic of Glutathione reductase, mitochondrial	GSHR_MOUSE	inf	0.0600035	0.0966099	1.75031e-05
Q9WU63	Hebp2	Heme-binding protein 2	HEBP2_MOUSE	inf	0.0601394	0.0967161	6.16415e-06
O55022	Pgrmc1	Membrane-associated progesterone receptor component 1	PGRC1_MOUSE	1.18241	0.0601532	0.0967161	0.000519047
Q8BGS2;Q8BGS2-2	Bola2	BolA-like protein 2;Isoform 2 of BolA-like protein 2	BOLA2_MOUSE	inf	0.0601899	0.0967161	1.96907e-06
Q8BIE6;Q8BIE6-2	Frmd4a	FERM domain-containing protein 4A;Isoform 2 of FERM domain-containing protein 4A	FRM4A_MOUSE	inf	0.0602101	0.0967161	3.57379e-06
Q99JX4	Eif3m	Eukaryotic translation initiation factor 3 subunit M	EIF3M_MOUSE	inf	0.0603648	0.0968528	4.59131e-06
P70704;P70704-3	Atp8a1	Phospholipid-transporting ATPase IA;Isoform 3 of Phospholipid-transporting ATPase IA	AT8A1_MOUSE	0.69378	0.0603921	0.0968528	0.000286031
Q69ZX8	Ablim3	Actin-binding LIM protein 3	ABLM3_MOUSE	inf	0.0604009	0.0968528	4.81281e-06
Q99L13	Hibadh	3-hydroxyisobutyrate dehydrogenase, mitochondrial	3HIDH_MOUSE	inf	0.0605191	0.0969858	5.41488e-06
Q3UUG6;Q3UUG6-2	Tbc1d24	TBC1 domain family member 24;Isoform 2 of TBC1 domain family member 24	TBC24_MOUSE	inf	0.0606132	0.097039	4.85393e-06
Q9Z127	Slc7a5	Large neutral amino acids transporter small subunit 1	LAT1_MOUSE	2.36691	0.0606229	0.097039	2.15266e-05
P70429;P70429-2	Evl	Ena/VASP-like protein;Isoform 1 of Ena/VASP-like protein	EVL_MOUSE	inf	0.0607763	0.0971868	3.03988e-06
Q9QYI5;Q9QYI5-1	Dnajb2	DnaJ homolog subfamily B member 2;Isoform 2 of DnaJ homolog subfamily B member 2	DNJB2_MOUSE	inf	0.0608187	0.0971868	1.46133e-05
Q9D7M1	Gid8	Glucose-induced degradation protein 8 homolog	GID8_MOUSE	inf	0.0608846	0.0971868	9.15633e-06
Q8CGA0	Ppm1f	Protein phosphatase 1F	PPM1F_MOUSE	inf	0.0609199	0.0971868	3.00105e-06
Q7TPV2;Q7TPV2-2;Q7TPV2-3	Dzip3	E3 ubiquitin-protein ligase DZIP3;Isoform 2 of E3 ubiquitin-protein ligase DZIP3;Isoform 3 of E3 ubiquitin-protein ligase DZIP3	DZIP3_MOUSE	inf	0.0609552	0.0971868	1.58149e-05
Q8BIJ6	Iars2	Isoleucine--tRNA ligase, mitochondrial	SYIM_MOUSE	1.9041	0.060979	0.0971868	2.14946e-05
Q8C5Q4	Grsf1	G-rich sequence factor 1	GRSF1_MOUSE	inf	0.0609798	0.0971868	6.61085e-06
Q9CQF3	Nudt21	Cleavage and polyadenylation specificity factor subunit 5	CPSF5_MOUSE	inf	0.060998	0.0971868	6.37412e-06
Q9CQ13	Coprs	Coordinator of PRMT5 and differentiation stimulator	COPRS_MOUSE	inf	0.0611958	0.0974455	6.89068e-06
Q9EPR5	Sorcs2	VPS10 domain-containing receptor SorCS2	SORC2_MOUSE	inf	0.0613281	0.0975465	3.70135e-06
O88653	Lamtor3	Ragulator complex protein LAMTOR3	LTOR3_MOUSE	inf	0.0613301	0.0975465	1.32794e-05
Q8BIW1	Prune1	Exopolyphosphatase PRUNE1	PRUN1_MOUSE	1.92972	0.0613929	0.0975899	0.000179519
Q3UMT1	Ppp1r12c	Protein phosphatase 1 regulatory subunit 12C	PP12C_MOUSE	inf	0.0615668	0.0977959	2.51302e-06
Q80TF3	Pcdh19	Protocadherin-19	PCD19_MOUSE	inf	0.0616558	0.0977959	9.22645e-06
Q3UYH7	Adrbk2	Beta-adrenergic receptor kinase 2	ARBK2_MOUSE	inf	0.0616587	0.0977959	3.79205e-06
Q9Z266;Q9Z266-2	Snapin	SNARE-associated protein Snapin;Isoform 2 of SNARE-associated protein Snapin	SNAPN_MOUSE	inf	0.0616647	0.0977959	7.03024e-06
Q505B7	Zbtb8os	Protein archease	ARCH_MOUSE	inf	0.0617973	0.0979496	8.8117e-06
Q8BJY1	Psmd5	26S proteasome non-ATPase regulatory subunit 5	PSMD5_MOUSE	1.86278	0.0618804	0.0980249	4.12341e-05
Q9R1T2;Q9R1T2-2	Sae1	SUMO-activating enzyme subunit 1;Isoform 2 of SUMO-activating enzyme subunit 1	SAE1_MOUSE	inf	0.0619696	0.0981097	4.00848e-06
Q9CQA1	Trappc5	Trafficking protein particle complex subunit 5	TPPC5_MOUSE	inf	0.0620984	0.0982569	7.43371e-06
P63325	Rps10	40S ribosomal protein S10	RS10_MOUSE	3.11881	0.062271	0.0984235	0.000178145
Q80TB8	Vat1l	Synaptic vesicle membrane protein VAT-1 homolog-like	VAT1L_MOUSE	2.55721	0.0622752	0.0984235	5.60968e-05
Q61171	Prdx2	Peroxiredoxin-2	PRDX2_MOUSE	0.695263	0.0623374	0.0984651	0.000703319
P58404;P58404-2	Strn4	Striatin-4;Isoform 2 of Striatin-4	STRN4_MOUSE	inf	0.0623907	0.0984928	2.73554e-06
Q64487;Q64487-1;Q64487-10;Q64487-11;Q64487-12;Q64487-2;Q64487-3;Q64487-5;Q64487-6;Q64487-7;Q64487-8;Q64487-9	Ptprd	Receptor-type tyrosine-protein phosphatase delta;Isoform C of Receptor-type tyrosine-protein phosphatase delta;Isoform J of Receptor-type tyrosine-protein phosphatase delta;Isoform K of Receptor-type tyrosine-protein phosphatase delta;Isoform L of Receptor-type tyrosine-protein phosphatase delta;Isoform A of Receptor-type tyrosine-protein phosphatase delta;Isoform B of Receptor-type tyrosine-prot…	PTPRD_MOUSE	inf	0.0624833	0.0985441	8.86359e-06
Q9DC04;Q9DC04-1;Q9DC04-4	Rgs3	Regulator of G-protein signaling 3;Isoform 5 of Regulator of G-protein signaling 3;Isoform 2 of Regulator of G-protein signaling 3	RGS3_MOUSE	inf	0.0624949	0.0985441	3.73668e-06
Q8BY89;Q8BY89-2	Slc44a2	Choline transporter-like protein 2;Isoform 2 of Choline transporter-like protein 2	CTL2_MOUSE	2.30356	0.0625589	0.0985885	1.46852e-05
Q3UPH1	Prrc1	Protein PRRC1	PRRC1_MOUSE	inf	0.0625966	0.0985914	4.26804e-06
Q9DCN2;Q9DCN2-2	Cyb5r3	NADH-cytochrome b5 reductase 3;Isoform 2 of NADH-cytochrome b5 reductase 3	NB5R3_MOUSE	2.48516	0.0628071	0.098828	3.14721e-05
P10751	Zfp11	Zinc finger protein 11	ZFP11_MOUSE	3.83149	0.0628314	0.098828	0.000903088
Q61282	Acan	Aggrecan core protein	PGCA_MOUSE	inf	0.0628546	0.098828	1.58776e-05
P83741;P83741-2;P83741-3;P83741-4;P83741-5	Wnk1	Serine/threonine-protein kinase WNK1;Isoform 2 of Serine/threonine-protein kinase WNK1;Isoform 3 of Serine/threonine-protein kinase WNK1;Isoform 4 of Serine/threonine-protein kinase WNK1;Isoform 5 of Serine/threonine-protein kinase WNK1	WNK1_MOUSE	inf	0.063178	0.0992022	9.84666e-06
Q9D024;Q9D024-2	Ccdc47	Coiled-coil domain-containing protein 47;Isoform 2 of Coiled-coil domain-containing protein 47	CCD47_MOUSE	1.82806	0.0631868	0.0992022	3.56771e-05
Q9D8Y0	Efhd2	EF-hand domain-containing protein D2	EFHD2_MOUSE	inf	0.0632163	0.0992022	8.04994e-06
P63001	Rac1	Ras-related C3 botulinum toxin substrate 1	RAC1_MOUSE	2.63963	0.0632369	0.0992022	8.13793e-05
P35486	Pdha1	Pyruvate dehydrogenase E1 component subunit alpha, somatic form, mitochondrial	ODPA_MOUSE	1.0075	0.0634465	0.0994743	0.000148078
Q9D0L7;Q9D0L7-2	Armc10	Armadillo repeat-containing protein 10;Isoform 2 of Armadillo repeat-containing protein 10	ARM10_MOUSE	2.40684	0.0635007	0.0994814	2.92835e-05
Q8C0Y0;Q8C0Y0-2;Q8C0Y0-3	Ppp4r4	Serine/threonine-protein phosphatase 4 regulatory subunit 4;Isoform 2 of Serine/threonine-protein phosphatase 4 regulatory subunit 4;Isoform 3 of Serine/threonine-protein phosphatase 4 regulatory subunit 4	PP4R4_MOUSE	inf	0.0635234	0.0994814	8.59424e-06
Q2TPA8	Hsdl2	Hydroxysteroid dehydrogenase-like protein 2	HSDL2_MOUSE	inf	0.0637844	0.0998334	2.09051e-06
Q8BR90;Q8BR90-2	Unknown	UPF0600 protein C5orf51 homolog;Isoform 2 of UPF0600 protein C5orf51 homolog	CE051_MOUSE	inf	0.0638564	0.0998891	5.94278e-06
Q8BXA5	Clptm1l	Cleft lip and palate transmembrane protein 1-like protein	CLP1L_MOUSE	inf	0.0640147	0.10008	2.07349e-06
O35607	Bmpr2	Bone morphogenetic protein receptor type-2	BMPR2_MOUSE	inf	0.0641773	0.100277	7.89983e-06
Q99LH2	Ptdss1	Phosphatidylserine synthase 1	PTSS1_MOUSE	inf	0.0642344	0.100287	5.8949e-06
Q05186	Rcn1	Reticulocalbin-1	RCN1_MOUSE	inf	0.0642569	0.100287	2.43197e-05
Q80U23-2	Snph	Isoform 2 of Syntaphilin	SNPH_MOUSE	inf	0.0645188	0.100639	8.30228e-06
P48771	Cox7a2	Cytochrome c oxidase subunit 7A2, mitochondrial	CX7A2_MOUSE	1.8898	0.0646376	0.100767	1.79819e-05
P14206	Rpsa	40S ribosomal protein SA	RSSA_MOUSE	2.69378	0.0647846	0.100939	9.66888e-05
Q9JKN6	Nova1	RNA-binding protein Nova-1	NOVA1_MOUSE	inf	0.0648305	0.100954	5.95049e-06
Q60829	Ppp1r1b	Protein phosphatase 1 regulatory subunit 1B	PPR1B_MOUSE	0.969321	0.0649125	0.101024	2.43614e-05
Q99J45	Nrbp1	Nuclear receptor-binding protein	NRBP_MOUSE	inf	0.0650768	0.101222	3.12721e-06
P28663	Napb	Beta-soluble NSF attachment protein	SNAB_MOUSE	2.43504	0.0652224	0.101391	4.61389e-05
Q9Z1S8	Gab2	GRB2-associated-binding protein 2	GAB2_MOUSE	inf	0.0652971	0.10145	5.61084e-06
Q8VED9	Lgalsl	Galectin-related protein	LEGL_MOUSE	2.48164	0.0656362	0.10192	5.79221e-05
Q6NXK7	Dpp10	Inactive dipeptidyl peptidase 10	DPP10_MOUSE	inf	0.0656969	0.101956	1.26037e-05
Q6PE13	Prrt3	Proline-rich transmembrane protein 3	PRRT3_MOUSE	inf	0.0657929	0.102048	2.47631e-06
P39054;P39054-2	Dnm2	Dynamin-2;Isoform 2 of Dynamin-2	DYN2_MOUSE	inf	0.0659439	0.102224	1.79946e-06
P70211;P70211-2;P70211-3	Dcc	Netrin receptor DCC;Isoform C of Netrin receptor DCC;Isoform B of Netrin receptor DCC	DCC_MOUSE	inf	0.0661106	0.102425	4.16188e-06
Q9EQJ9;Q9EQJ9-2	Magi3	Membrane-associated guanylate kinase, WW and PDZ domain-containing protein 3;Isoform 2 of Membrane-associated guanylate kinase, WW and PDZ domain-containing protein 3	MAGI3_MOUSE	2.42844	0.0663887	0.102747	4.15959e-05
Q8BWF0	Aldh5a1	Succinate-semialdehyde dehydrogenase, mitochondrial	SSDH_MOUSE	1.14011	0.0663931	0.102747	6.10871e-05
Q8VDU5	Snrk	SNF-related serine/threonine-protein kinase	SNRK_MOUSE	inf	0.0665059	0.102793	8.52465e-06
Q8CIP4;Q8CIP4-2	Mark4	MAP/microtubule affinity-regulating kinase 4;Isoform 2 of MAP/microtubule affinity-regulating kinase 4	MARK4_MOUSE	inf	0.0665129	0.102793	2.8772e-06
O55026	Entpd2	Ectonucleoside triphosphate diphosphohydrolase 2	ENTP2_MOUSE	inf	0.0665348	0.102793	1.64023e-05
Q80V42	Cpm	Carboxypeptidase M	CBPM_MOUSE	inf	0.0666458	0.102906	1.13173e-05
Q9DC11	Plxdc2	Plexin domain-containing protein 2	PXDC2_MOUSE	inf	0.0668772	0.103206	3.69887e-06
P51859	Hdgf	Hepatoma-derived growth factor	HDGF_MOUSE	inf	0.0669337	0.103235	2.13651e-05
O88444	Adcy1	Adenylate cyclase type 1	ADCY1_MOUSE	inf	0.0672225	0.103622	5.09477e-06
Q9JMH6;Q9JMH6-2	Txnrd1	Thioredoxin reductase 1, cytoplasmic;Isoform 2 of Thioredoxin reductase 1, cytoplasmic	TRXR1_MOUSE	0.873687	0.0685717	0.105643	3.84307e-05
Q9ES97-3	Rtn3	Isoform 3 of Reticulon-3	RTN3_MOUSE	2.83421	0.0686366	0.105659	9.54374e-05
Q9R1Z7	Pts	6-pyruvoyl tetrahydrobiopterin synthase	PTPS_MOUSE	inf	0.0686956	0.105659	3.79244e-06
P35283	Rab12	Ras-related protein Rab-12	RAB12_MOUSE	2.20557	0.0686974	0.105659	1.9849e-05
P99027	Rplp2	60S acidic ribosomal protein P2	RLA2_MOUSE	1.75319	0.0689115	0.105929	2.29135e-05
P62702	Rps4x	40S ribosomal protein S4, X isoform	RS4X_MOUSE	0.726302	0.0692475	0.106386	8.9246e-05
P26443	Glud1	Glutamate dehydrogenase 1, mitochondrial	DHE3_MOUSE	1.02226	0.0693084	0.10642	0.000116335
Q922Q8	Lrrc59	Leucine-rich repeat-containing protein 59	LRC59_MOUSE	2.12657	0.0695903	0.106793	2.54479e-05
P43407	Sdc2	Syndecan-2	SDC2_MOUSE	inf	0.0701032	0.10752	2.39015e-06
O35609	Scamp3	Secretory carrier-associated membrane protein 3	SCAM3_MOUSE	1.6847	0.0702446	0.107677	1.6878e-05
Q9CQM9	Glrx3	Glutaredoxin-3	GLRX3_MOUSE	1.48756	0.0704735	0.107968	0.000201026
P63323	Rps12	40S ribosomal protein S12	RS12_MOUSE	1.69002	0.07056	0.10804	4.70534e-05
Q60766;Q60766-2	Irgm1	Immunity-related GTPase family M protein 1;Isoform 2 of Immunity-related GTPase family M protein 1	IRGM1_MOUSE	inf	0.0709177	0.108527	6.10004e-06
Q5EBJ4	Ermn	Ermin	ERMIN_MOUSE	inf	0.0712186	0.108927	1.26031e-05
Q3U2P1	Sec24a	Protein transport protein Sec24A	SC24A_MOUSE	inf	0.0713555	0.109046	2.41392e-05
Q80TS3;Q80TS3-2;Q80TS3-3;Q80TS3-4;Q80TS3-5;Q80TS3-6	Adgrl3	Adhesion G protein-coupled receptor L3;Isoform 2 of Adhesion G protein-coupled receptor L3;Isoform 3 of Adhesion G protein-coupled receptor L3;Isoform 4 of Adhesion G protein-coupled receptor L3;Isoform 5 of Adhesion G protein-coupled receptor L3;Isoform 6 of Adhesion G protein-coupled receptor L3	AGRL3_MOUSE	inf	0.0713755	0.109046	7.48738e-06
Q61753	Phgdh	D-3-phosphoglycerate dehydrogenase	SERA_MOUSE	0.804089	0.0714802	0.109145	7.4805e-05
Q9D8W7	Ociad2	OCIA domain-containing protein 2	OCAD2_MOUSE	2.03642	0.0717831	0.109547	2.44544e-05
G5E8K5;G5E8K5-2;G5E8K5-3	Ank3	Ankyrin-3;Isoform 2 of Ankyrin-3;Isoform 3 of Ankyrin-3	ANK3_MOUSE	2.44756	0.072128	0.110012	4.90673e-05
Q8C145	Slc39a6	Zinc transporter ZIP6	S39A6_MOUSE	inf	0.0724065	0.110376	1.97453e-06
Q3UYC0	Ppm1h	Protein phosphatase 1H	PPM1H_MOUSE	inf	0.0727053	0.110719	9.11118e-06
P61290	Psme3	Proteasome activator complex subunit 3	PSME3_MOUSE	inf	0.0727121	0.110719	9.45036e-06
A2APX8;A2APX8-2;A2APX8-3	Scn1a	Sodium channel protein type 1 subunit alpha;Isoform 2 of Sodium channel protein type 1 subunit alpha;Isoform 3 of Sodium channel protein type 1 subunit alpha	SCN1A_MOUSE	1.96795	0.0736624	0.112104	1.69468e-05
Q7TT50	Cdc42bpb	Serine/threonine-protein kinase MRCK beta	MRCKB_MOUSE	1.79794	0.0737194	0.112128	9.89243e-06
Q9ET01	Pygl	Glycogen phosphorylase, liver form	PYGL_MOUSE	2.33843	0.0739025	0.112345	4.91039e-05
P63044	Vamp2	Vesicle-associated membrane protein 2	VAMP2_MOUSE	2.27657	0.07396	0.11237	6.02972e-05
Q3THK7	Gmps	GMP synthase [glutamine-hydrolyzing]	GUAA_MOUSE	2.28956	0.0754424	0.114559	3.64041e-05
Q8K3J1	Ndufs8	NADH dehydrogenase [ubiquinone] iron-sulfur protein 8, mitochondrial	NDUS8_MOUSE	1.09062	0.0755818	0.114707	3.55293e-05
Q9CPY7;Q9CPY7-2	Lap3	Cytosol aminopeptidase;Isoform 2 of Cytosol aminopeptidase	AMPL_MOUSE	0.652928	0.0763618	0.115827	4.46884e-05
Q9ERR1	Ndel1	Nuclear distribution protein nudE-like 1	NDEL1_MOUSE	1.48024	0.0772028	0.117038	2.63845e-05
Q8JZP2	Syn3	Synapsin-3	SYN3_MOUSE	1.80568	0.0774876	0.117405	1.31048e-05
Q8C8T8	Tsr2	Pre-rRNA-processing protein TSR2 homolog	TSR2_MOUSE	inf	0.0775685	0.117463	8.05385e-06
P43006	Slc1a2	Excitatory amino acid transporter 2	EAA2_MOUSE	0.825151	0.077863	0.117844	0.000175019
P97355	Sms	Spermine synthase	SPSY_MOUSE	inf	0.0779247	0.117873	2.26978e-05
Q5F285	Tmem256	Transmembrane protein 256	TM256_MOUSE	1.4079	0.0783416	0.118438	6.50842e-05
Q60673	Ptprn	Receptor-type tyrosine-protein phosphatase-like N	PTPRN_MOUSE	inf	0.0785415	0.118675	8.15572e-06
P28474	Adh5	Alcohol dehydrogenase class-3	ADHX_MOUSE	2.20674	0.0787512	0.118927	3.07065e-05
Q61316	Hspa4	Heat shock 70 kDa protein 4	HSP74_MOUSE	2.41695	0.078873	0.119045	6.83382e-05
O55023	Impa1	Inositol monophosphatase 1	IMPA1_MOUSE	2.19688	0.0790625	0.119266	3.52801e-05
Q9QYX7	Pclo	Protein piccolo	PCLO_MOUSE	1.51293	0.0792861	0.119538	1.4323e-05
Q9JJG6	Tmem47	Transmembrane protein 47	TMM47_MOUSE	1.52873	0.0796253	0.119983	1.3439e-05
Q9CZY3	Ube2v1	Ubiquitin-conjugating enzyme E2 variant 1	UB2V1_MOUSE	2.23091	0.0801717	0.12074	4.78312e-05
Q69ZH9	Arhgap23	Rho GTPase-activating protein 23	RHG23_MOUSE	-1.02058	0.0803941	0.121009	9.96653e-05
Q99JP4	Cdc26	Anaphase-promoting complex subunit CDC26	CDC26_MOUSE	inf	0.0805886	0.121236	2.82457e-06
Q9EQZ7	Rims2	Regulating synaptic membrane exocytosis protein 2	RIMS2_MOUSE	inf	0.0807353	0.12139	7.53919e-06
P35979	Rpl12	60S ribosomal protein L12	RL12_MOUSE	1.70319	0.0811393	0.121931	8.04546e-05
Q06890	Clu	Clusterin	CLUS_MOUSE	inf	0.0818635	0.122931	4.85694e-06
Q91WD5	Ndufs2	NADH dehydrogenase [ubiquinone] iron-sulfur protein 2, mitochondrial	NDUS2_MOUSE	2.04808	0.0818943	0.122931	3.03709e-05
Q9QYI4	Dnajb12	DnaJ homolog subfamily B member 12	DJB12_MOUSE	inf	0.0826108	0.123939	2.90235e-06
Q9D6J5	Ndufb8	NADH dehydrogenase [ubiquinone] 1 beta subcomplex subunit 8, mitochondrial	NDUB8_MOUSE	2.11615	0.0832466	0.124782	2.92527e-05
Q60854	Serpinb6	Serpin B6	SPB6_MOUSE	1.90575	0.0832634	0.124782	1.40383e-05
Q8BGS7;Q8BGS7-2	Cept1	Choline/ethanolaminephosphotransferase 1;Isoform 2 of Choline/ethanolaminephosphotransferase 1	CEPT1_MOUSE	1.29724	0.0839025	0.125671	3.28346e-05
Q99MI1;Q99MI1-2	Erc1	ELKS/Rab6-interacting/CAST family member 1;Isoform 2 of ELKS/Rab6-interacting/CAST family member 1	RB6I2_MOUSE	inf	0.0844938	0.126457	5.91826e-06
Q91V61	Sfxn3	Sideroflexin-3	SFXN3_MOUSE	1.06375	0.0845192	0.126457	5.9552e-05
P47746	Cnr1	Cannabinoid receptor 1	CNR1_MOUSE	1.95133	0.0851958	0.1274	1.74478e-05
P12367	Prkar2a	cAMP-dependent protein kinase type II-alpha regulatory subunit	KAP2_MOUSE	2.08379	0.0853937	0.127626	2.95059e-05
Q9D6J6	Ndufv2	NADH dehydrogenase [ubiquinone] flavoprotein 2, mitochondrial	NDUV2_MOUSE	1.26668	0.0857083	0.128027	4.45732e-05
Q9CQH3	Ndufb5	NADH dehydrogenase [ubiquinone] 1 beta subcomplex subunit 5, mitochondrial	NDUB5_MOUSE	1.32089	0.0858974	0.12824	2.31556e-05
Q8BMF4	Dlat	Dihydrolipoyllysine-residue acetyltransferase component of pyruvate dehydrogenase complex, mitochondrial	ODP2_MOUSE	0.873937	0.0869925	0.129804	0.000157267
Q9CQ69	Uqcrq	Cytochrome b-c1 complex subunit 8	QCR8_MOUSE	0.533658	0.0883417	0.131723	0.000108196
Q3UHX2	Pdap1	28 kDa heat- and acid-stable phosphoprotein	HAP28_MOUSE	2.11545	0.0883739	0.131723	4.59217e-05
P61922	Abat	4-aminobutyrate aminotransferase, mitochondrial	GABT_MOUSE	1.32303	0.088741	0.132198	0.00013035
Q9QUP5	Hapln1	Hyaluronan and proteoglycan link protein 1	HPLN1_MOUSE	1.89787	0.0890001	0.132512	0.000282994
O88448	Klc2	Kinesin light chain 2	KLC2_MOUSE	1.10254	0.0891032	0.132573	5.16746e-05
Q922H2	Pdk3	[Pyruvate dehydrogenase (acetyl-transferring)] kinase isozyme 3, mitochondrial	PDK3_MOUSE	0.745141	0.0891373	0.132573	2.89053e-05
Q60605;Q60605-2	Myl6	Myosin light polypeptide 6;Isoform Smooth muscle of Myosin light polypeptide 6	MYL6_MOUSE	1.80157	0.0895414	0.133102	9.80229e-05
Q9JM52;Q9JM52-2;Q9JM52-3	Mink1	Misshapen-like kinase 1;Isoform 1 of Misshapen-like kinase 1;Isoform 3 of Misshapen-like kinase 1	MINK1_MOUSE	2.6063	0.089895	0.133556	0.000233382
Q6ZPJ3	Ube2o	(E3-independent) E2 ubiquitin-conjugating enzyme UBE2O	UBE2O_MOUSE	0.961606	0.0899768	0.133605	8.33825e-05
P0DN34	Ndufb1	NADH dehydrogenase [ubiquinone] 1 beta subcomplex subunit 1	NDUB1_MOUSE	1.90114	0.0900252	0.133605	3.15216e-05
Q80WJ7	Mtdh	Protein LYRIC	LYRIC_MOUSE	1.92044	0.090327	0.13398	2.82204e-05
Q61205	Pafah1b3	Platelet-activating factor acetylhydrolase IB subunit gamma	PA1B3_MOUSE	4.47078	0.0906704	0.134417	3.00502e-05
Q6Q477;Q6Q477-2	Atp2b4	Plasma membrane calcium-transporting ATPase 4;Isoform 2 of Plasma membrane calcium-transporting ATPase 4	AT2B4_MOUSE	2.08122	0.0907785	0.134505	4.60408e-05
P62897	Cycs	Cytochrome c, somatic	CYC_MOUSE	0.953011	0.0915561	0.135584	0.00067509
O08599-2	Stxbp1	Isoform 2 of Syntaxin-binding protein 1	STXB1_MOUSE	2.19673	0.0916669	0.135675	5.82533e-05
O70251	Eef1b	Elongation factor 1-beta	EF1B_MOUSE	1.82992	0.0928336	0.137328	6.71876e-05
P14131	Rps16	40S ribosomal protein S16	RS16_MOUSE	0.76158	0.093083	0.137623	9.33001e-05
Q9JIA1	Lgi1	Leucine-rich glioma-inactivated protein 1	LGI1_MOUSE	2.63197	0.0952136	0.140697	5.59782e-05
Q9D3D9	Atp5f1d	ATP synthase subunit delta, mitochondrial	ATPD_MOUSE	2.23682	0.0957892	0.141472	4.81939e-05
Q6NVF0	Ocrl	Inositol polyphosphate 5-phosphatase OCRL	OCRL_MOUSE	1.14359	0.0958407	0.141472	2.17034e-05
O55126	Nipsnap2	Protein NipSnap homolog 2	NIPS2_MOUSE	1.00236	0.0961803	0.141897	8.21651e-05
P40124	Cap1	Adenylyl cyclase-associated protein 1	CAP1_MOUSE	1.05176	0.0965418	0.142354	0.000139667
D3YVE8	Slc35g2	Solute carrier family 35 member G2	S35G2_MOUSE	1.25796	0.0970307	0.142998	1.01302e-05
P35802	Gpm6a	Neuronal membrane glycoprotein M6-a	GPM6A_MOUSE	1.2111	0.0978508	0.144129	0.00015522
Q3V1U8	Elmod1	ELMO domain-containing protein 1	ELMD1_MOUSE	-0.854721	0.0985464	0.145076	0.0018128
P07724	Alb	Serum albumin	ALBU_MOUSE	1.80593	0.0990409	0.145726	2.55995e-05
Q5SV85;Q5SV85-2	Synrg	Synergin gamma;Isoform 2 of Synergin gamma	SYNRG_MOUSE	2.05585	0.0994378	0.146232	5.95146e-05
P21107-2	Tpm3	Isoform 2 of Tropomyosin alpha-3 chain	TPM3_MOUSE	1.98218	0.0997597	0.146627	5.64496e-05
P10922	H1-0	Histone H1.0	H10_MOUSE	0.903908	0.0999235	0.146789	0.000298412
Q61035	Hars1	Histidine--tRNA ligase, cytoplasmic	HARS1_MOUSE	0.838735	0.100425	0.147447	8.43804e-05
P40237	Cd82	CD82 antigen	CD82_MOUSE	1.00541	0.100886	0.148046	2.79336e-05
P08071	Ltf	Lactotransferrin	TRFL_MOUSE	inf	0.101704	0.149121	3.57977e-05
Q8BTX9	Hsdl1	Inactive hydroxysteroid dehydrogenase-like protein 1	HSDL1_MOUSE	0.626482	0.101727	0.149121	0.000116755
P15864	H1-2	Histone H1.2	H12_MOUSE	0.700146	0.102353	0.149957	0.000128968
P62852	Rps25	40S ribosomal protein S25	RS25_MOUSE	0.790685	0.103938	0.152199	0.000116343
Q9QXK3;Q9QXK3-3;Q9QXK3-4;Q9QZE5	Copg2;Copg2;Copg2;Copg1	Coatomer subunit gamma-2;Isoform 3 of Coatomer subunit gamma-2;Isoform 4 of Coatomer subunit gamma-2;Coatomer subunit gamma-1	COPG2_MOUSE;COPG2_MOUSE;COPG2_MOUSE;COPG1_MOUSE	1.67051	0.104574	0.153048	2.07264e-05
Q9CQ92	Fis1	Mitochondrial fission 1 protein	FIS1_MOUSE	0.852846	0.105286	0.15401	4.02881e-05
Q3THG9	Aarsd1	Alanyl-tRNA editing protein Aarsd1	AASD1_MOUSE	1.88543	0.105458	0.15412	4.57326e-05
P30999;P30999-2;P30999-3	Ctnnd1	Catenin delta-1;Isoform 2 of Catenin delta-1;Isoform 3 of Catenin delta-1	CTND1_MOUSE	-2.06067	0.105474	0.15412	0.00453454
O55029	Copb2	Coatomer subunit beta'	COPB2_MOUSE	1.77381	0.106219	0.155126	2.67673e-05
D3Z7P3	Gls	Glutaminase kidney isoform, mitochondrial	GLSK_MOUSE	0.683039	0.106497	0.155449	3.54843e-05
Q4VAA2;Q4VAA2-2	Cdv3	Protein CDV3;Isoform 2 of Protein CDV3	CDV3_MOUSE	0.581298	0.107002	0.156104	7.5663e-05
Q921I1	Tf	Serotransferrin	TRFE_MOUSE	0.963086	0.107579	0.156862	1.78104e-05
Q9D898	Arpc5l	Actin-related protein 2/3 complex subunit 5-like protein	ARP5L_MOUSE	2.06803	0.107721	0.156987	6.22158e-05
O70503	Hsd17b12	Very-long-chain 3-oxoacyl-CoA reductase	DHB12_MOUSE	0.81518	0.108815	0.158479	7.44948e-05
Q99KE1	Me2	NAD-dependent malic enzyme, mitochondrial	MAOM_MOUSE	1.48884	0.108861	0.158479	1.23997e-05
Q9D6R2	Idh3a	Isocitrate dehydrogenase [NAD] subunit alpha, mitochondrial	IDH3A_MOUSE	0.76458	0.109025	0.158634	0.000144333
Q7TMB8	Cyfip1	Cytoplasmic FMR1-interacting protein 1	CYFP1_MOUSE	3.57089	0.110513	0.160715	5.62429e-06
P61027	Rab10	Ras-related protein Rab-10	RAB10_MOUSE	1.66945	0.11139	0.161839	2.42454e-05
P84091	Ap2m1	AP-2 complex subunit mu	AP2M1_MOUSE	1.03077	0.111404	0.161839	0.000336795
O35453;O35453-2;P00755;P15949;Q9QYN3;Q9QYN3-2	Hpn;Hpn;Klk1b1;Klk1b9;Klk11;Klk11	Serine protease hepsin;Isoform 2 of Serine protease hepsin;Kallikrein 1-related peptidase b1;Kallikrein 1-related peptidase b9;Kallikrein-11;Isoform 1 of Kallikrein-11	HEPS_MOUSE;HEPS_MOUSE;K1KB1_MOUSE;K1KB9_MOUSE;KLK11_MOUSE;KLK11_MOUSE	1.6864	0.112726	0.163673	0.000127508
O89094;O89094-2	Casp14	Caspase-14;Isoform 2 of Caspase-14	CASPE_MOUSE	1.80476	0.1143	0.165871	5.97562e-05
B1AWN6	Scn2a	Sodium channel protein type 2 subunit alpha	SCN2A_MOUSE	1.87384	0.114495	0.166066	4.72082e-05
A3KMP2;A3KMP2-2	Ttc38	Tetratricopeptide repeat protein 38;Isoform 2 of Tetratricopeptide repeat protein 38	TTC38_MOUSE	-1.67721	0.115591	0.167567	8.17707e-06
Q60865	Caprin1	Caprin-1	CAPR1_MOUSE	2.17881	0.116183	0.168337	0.000146249
Q00493	Cpe	Carboxypeptidase E	CBPE_MOUSE	1.56727	0.116393	0.168552	1.958e-05
Q60634;Q60634-2;Q60634-3	Flot2	Flotillin-2;Isoform 2 of Flotillin-2;Isoform 3 of Flotillin-2	FLOT2_MOUSE	1.34293	0.117844	0.170563	1.08715e-05
Q9DCZ4;Q9DCZ4-2;Q9DCZ4-3	Apoo	MICOS complex subunit Mic26;Isoform 2 of MICOS complex subunit Mic26;Isoform 3 of MICOS complex subunit Mic26	MIC26_MOUSE	2.11117	0.117918	0.170581	9.29531e-05
Q02248	Ctnnb1	Catenin beta-1	CTNB1_MOUSE	0.904319	0.11798	0.170581	0.000870895
Q9CR68	Uqcrfs1	Cytochrome b-c1 complex subunit Rieske, mitochondrial	UCRI_MOUSE	1.5718	0.11845	0.17117	3.73831e-05
O88712	Ctbp1	C-terminal-binding protein 1	CTBP1_MOUSE	2.03414	0.118622	0.171254	9.22782e-05
P62774	Mtpn	Myotrophin	MTPN_MOUSE	1.53833	0.118632	0.171254	2.4091e-05
Q93092	Taldo1	Transaldolase	TALDO_MOUSE	0.831846	0.119521	0.172446	9.17249e-06
Q0KL02;Q0KL02-3;Q0KL02-4	Trio	Triple functional domain protein;Isoform 3 of Triple functional domain protein;Isoform 4 of Triple functional domain protein	TRIO_MOUSE	0.920121	0.119818	0.172784	1.51895e-05
Q8BWR2	Pithd1	PITH domain-containing protein 1	PITH1_MOUSE	1.80676	0.120414	0.173552	4.30182e-05
P08249	Mdh2	Malate dehydrogenase, mitochondrial	MDHM_MOUSE	0.764623	0.120693	0.173863	0.000397502
O70309	Itgb5	Integrin beta-5	ITB5_MOUSE	2.09138	0.121877	0.175478	9.05699e-05
P99026	Psmb4	Proteasome subunit beta type-4	PSB4_MOUSE	0.627001	0.123317	0.177457	4.62978e-05
Q9DBP5	Cmpk1	UMP-CMP kinase	KCY_MOUSE	1.70096	0.1236	0.177771	4.03077e-05
Q9ERK4	Cse1l	Exportin-2	XPO2_MOUSE	1.41578	0.12374	0.177881	4.50083e-05
Q3TDQ1	Stt3b	Dolichyl-diphosphooligosaccharide--protein glycosyltransferase subunit STT3B	STT3B_MOUSE	0.840456	0.123897	0.178014	1.67903e-05
Q8VDD8	Washc1	WASH complex subunit 1	WASH1_MOUSE	1.90373	0.124488	0.178768	7.28631e-05
Q3UGR5	Hdhd2	Haloacid dehalogenase-like hydrolase domain-containing protein 2	HDHD2_MOUSE	2.95728	0.124727	0.179019	9.43293e-06
Q8CA95;Q8CA95-2;Q8CA95-3	Pde10a	cAMP and cAMP-inhibited cGMP 3',5'-cyclic phosphodiesterase 10A;Isoform 2 of cAMP and cAMP-inhibited cGMP 3',5'-cyclic phosphodiesterase 10A;Isoform 3 of cAMP and cAMP-inhibited cGMP 3',5'-cyclic phosphodiesterase 10A	PDE10_MOUSE	0.800393	0.125533	0.180081	5.00951e-05
P47199	Cryz	Quinone oxidoreductase	QOR_MOUSE	1.4208	0.126308	0.181095	1.47067e-05
Q9DBG6	Rpn2	Dolichyl-diphosphooligosaccharide--protein glycosyltransferase subunit 2	RPN2_MOUSE	0.901756	0.126372	0.181095	3.26465e-05
P13707	Gpd1	Glycerol-3-phosphate dehydrogenase [NAD(+)], cytoplasmic	GPDA_MOUSE	0.584235	0.127815	0.183068	6.26026e-05
Q62425	Ndufa4	Cytochrome c oxidase subunit NDUFA4	NDUA4_MOUSE	0.897677	0.128321	0.183698	0.00011855
Q91WS0	Cisd1	CDGSH iron-sulfur domain-containing protein 1	CISD1_MOUSE	1.01609	0.12861	0.184016	9.1273e-05
Q9D517	Agpat3	1-acyl-sn-glycerol-3-phosphate acyltransferase gamma	PLCC_MOUSE	0.858718	0.128753	0.184124	5.04461e-05
O55017;O55017-2	Cacna1b	Voltage-dependent N-type calcium channel subunit alpha-1B;Isoform NB2 of Voltage-dependent N-type calcium channel subunit alpha-1B	CAC1B_MOUSE	0.496183	0.129526	0.185105	3.24944e-05
Q9CWJ9	Atic	Bifunctional purine biosynthesis protein PURH	PUR9_MOUSE	2.88226	0.129574	0.185105	1.62304e-05
O88737	Bsn	Protein bassoon	BSN_MOUSE	1.34769	0.130094	0.185753	2.86823e-05
Q8BKX1;Q8BKX1-2;Q8BKX1-3;Q8BKX1-4	Baiap2	Brain-specific angiogenesis inhibitor 1-associated protein 2;Isoform 2 of Brain-specific angiogenesis inhibitor 1-associated protein 2;Isoform 3 of Brain-specific angiogenesis inhibitor 1-associated protein 2;Isoform 4 of Brain-specific angiogenesis inhibitor 1-associated protein 2	BAIP2_MOUSE	2.80186	0.130528	0.186276	6.14047e-06
Q2PFD7;Q2PFD7-2	Psd3	PH and SEC7 domain-containing protein 3;Isoform 2 of PH and SEC7 domain-containing protein 3	PSD3_MOUSE	-0.657151	0.131103	0.186998	0.000534268
Q99020	Hnrnpab	Heterogeneous nuclear ribonucleoprotein A/B	ROAA_MOUSE	1.20097	0.131973	0.188142	0.000107157
Q8K358	Pigu	Phosphatidylinositol glycan anchor biosynthesis class U protein	PIGU_MOUSE	0.40982	0.132609	0.18895	3.03624e-05
Q8R5J9	Arl6ip5	PRA1 family protein 3	PRAF3_MOUSE	0.148874	0.133116	0.189574	6.30381e-05
Q9DCW4	Etfb	Electron transfer flavoprotein subunit beta	ETFB_MOUSE	0.986583	0.133616	0.190188	2.84847e-05
Q8K097;Q8K097-2	Faim2	Protein lifeguard 2;Isoform 2 of Protein lifeguard 2	LFG2_MOUSE	2.66064	0.133908	0.190506	8.07614e-06
Q9DBF1;Q9DBF1-2	Aldh7a1	Alpha-aminoadipic semialdehyde dehydrogenase;Isoform 2 of Alpha-aminoadipic semialdehyde dehydrogenase	AL7A1_MOUSE	1.38128	0.134067	0.190576	1.79113e-05
Q9CPR4	Rpl17	60S ribosomal protein L17	RL17_MOUSE	0.511724	0.134096	0.190576	2.26762e-05
Q9Z2H5	Epb41l1	Band 4.1-like protein 1	E41L1_MOUSE	-3.00708	0.134381	0.190881	0.0459692
Q9D8B1;Q9D8B1-2	Aig1	Androgen-induced gene 1 protein;Isoform 2 of Androgen-induced gene 1 protein	AIG1_MOUSE	3.34853	0.13445	0.190881	2.81886e-05
P84309	Adcy5	Adenylate cyclase type 5	ADCY5_MOUSE	1.35179	0.134569	0.190952	4.10363e-05
Q62419	Sh3gl1	Endophilin-A2	SH3G1_MOUSE	inf	0.134814	0.191201	0.00600324
P51410	Rpl9	60S ribosomal protein L9	RL9_MOUSE	1.32707	0.135203	0.191654	3.11461e-05
O55135	Eif6	Eukaryotic translation initiation factor 6	IF6_MOUSE	1.53923	0.135343	0.191754	3.92261e-05
Q64310	Surf4	Surfeit locus protein 4	SURF4_MOUSE	0.715213	0.135814	0.192322	3.18792e-05
P50114	S100b	Protein S100-B	S100B_MOUSE	1.39125	0.137068	0.193998	1.54537e-05
Q5SSM3;Q5SSM3-2;Q5SSM3-3	Arhgap44	Rho GTPase-activating protein 44;Isoform 2 of Rho GTPase-activating protein 44;Isoform 3 of Rho GTPase-activating protein 44	RHG44_MOUSE	0.842905	0.137278	0.194195	4.93028e-05
Q9JI75	Nqo2	Ribosyldihydronicotinamide dehydrogenase [quinone]	NQO2_MOUSE	2.5895	0.138418	0.195707	5.2102e-06
O35633;O35633-2	Slc32a1	Vesicular inhibitory amino acid transporter;Isoform 2 of Vesicular inhibitory amino acid transporter	VIAAT_MOUSE	0.647938	0.138594	0.195855	0.000251952
Q99PT1	Arhgdia	Rho GDP-dissociation inhibitor 1	GDIR1_MOUSE	1.4242	0.140207	0.198033	3.42554e-05
O35945	Aldh1a7	Aldehyde dehydrogenase, cytosolic 1	AL1A7_MOUSE	1.1695	0.140652	0.198559	0.00020526
Q61335	Bcap31	B-cell receptor-associated protein 31	BAP31_MOUSE	0.839389	0.140784	0.198643	8.98744e-06
P09671	Sod2	Superoxide dismutase [Mn], mitochondrial	SODM_MOUSE	0.751581	0.140992	0.198835	9.93282e-05
Q9D6M3	Slc25a22	Mitochondrial glutamate carrier 1	GHC1_MOUSE	0.789717	0.141489	0.199434	0.000106359
P07091	S100a4	Protein S100-A4	S10A4_MOUSE	3.37129	0.142502	0.200758	3.2e-05
Q07797	Lgals3bp	Galectin-3-binding protein	LG3BP_MOUSE	1.63392	0.143172	0.201599	0.000493487
O88951	Lin7b	Protein lin-7 homolog B	LIN7B_MOUSE	0.431316	0.143669	0.202195	2.07183e-05
Q8R3Q2	Ppp6r2	Serine/threonine-protein phosphatase 6 regulatory subunit 2	PP6R2_MOUSE	1.25067	0.14438	0.203091	1.04937e-05
P16045	Lgals1	Galectin-1	LEG1_MOUSE	2.42499	0.145197	0.204137	7.45196e-06
P13020;P13020-2	Gsn	Gelsolin;Isoform 2 of Gelsolin	GELS_MOUSE	1.38434	0.146063	0.205249	2.01758e-05
P26041	Msn	Moesin	MOES_MOUSE	0.830394	0.14785	0.207654	5.24518e-05
Q8C8R3-7	Ank2	Isoform 7 of Ankyrin-2	ANK2_MOUSE	1.26143	0.148189	0.208025	1.04983e-05
Q99KI0	Aco2	Aconitate hydratase, mitochondrial	ACON_MOUSE	0.707545	0.14892	0.208785	0.000415922
Q8BLF1	Nceh1	Neutral cholesterol ester hydrolase 1	NCEH1_MOUSE	1.20893	0.149011	0.208785	1.74763e-05
P10107	Anxa1	Annexin A1	ANXA1_MOUSE	0.651695	0.149013	0.208785	7.19479e-05
P09542	Myl3	Myosin light chain 3	MYL3_MOUSE	0.600526	0.149035	0.208785	2.06191e-05
Q3ULJ0;Q3ULJ0-2	Gpd1l	Glycerol-3-phosphate dehydrogenase 1-like protein;Isoform 2 of Glycerol-3-phosphate dehydrogenase 1-like protein	GPD1L_MOUSE	1.16669	0.149894	0.209883	2.22981e-05
P59999	Arpc4	Actin-related protein 2/3 complex subunit 4	ARPC4_MOUSE	0.535045	0.150202	0.210206	4.60831e-05
P56391	Cox6b1	Cytochrome c oxidase subunit 6B1	CX6B1_MOUSE	1.51889	0.151909	0.212488	1.84162e-05
P52503	Ndufs6	NADH dehydrogenase [ubiquinone] iron-sulfur protein 6, mitochondrial	NDUS6_MOUSE	3.04635	0.153012	0.213921	6.82858e-06
Q9QYG0-2	Ndrg2	Isoform 2 of Protein NDRG2	NDRG2_MOUSE	0.636596	0.153886	0.215034	0.000179605
Q9DCU2	Pllp	Plasmolipin	PLLP_MOUSE	0.902891	0.155175	0.216725	9.8507e-05
P43276	H1-5	Histone H1.5	H15_MOUSE	1.44343	0.155746	0.217413	3.25938e-05
Q4KUS2	Unc13a	Protein unc-13 homolog A	UN13A_MOUSE	0.0931092	0.156953	0.218986	2.64785e-05
Q60899	Elavl2	ELAV-like protein 2	ELAV2_MOUSE	1.86128	0.157078	0.219049	0.000302724
P05202	Got2	Aspartate aminotransferase, mitochondrial	AATM_MOUSE	0.581258	0.157468	0.219482	0.00036283
O08749	Dld	Dihydrolipoyl dehydrogenase, mitochondrial	DLDH_MOUSE	0.626215	0.158149	0.220319	0.000105391
P20065-2	Tmsb4x	Isoform Short of Thymosin beta-4	TYB4_MOUSE	2.41981	0.161293	0.224585	1.67155e-05
Q9DC70	Ndufs7	NADH dehydrogenase [ubiquinone] iron-sulfur protein 7, mitochondrial	NDUS7_MOUSE	1.33143	0.162385	0.225991	2.51663e-05
Q9CQ75	Ndufa2	NADH dehydrogenase [ubiquinone] 1 alpha subcomplex subunit 2	NDUA2_MOUSE	1.07294	0.163021	0.226761	1.16485e-05
P61957	Sumo2	Small ubiquitin-related modifier 2	SUMO2_MOUSE	2.11446	0.163519	0.227339	6.91254e-06
Q6ZWU9	Rps27	40S ribosomal protein S27	RS27_MOUSE	1.53113	0.163888	0.227702	5.63088e-05
P60761	Nrgn	Neurogranin	NEUG_MOUSE	1.49814	0.163946	0.227702	3.83114e-05
Q8BWT1	Acaa2	3-ketoacyl-CoA thiolase, mitochondrial	THIM_MOUSE	0.507623	0.164849	0.228841	2.57472e-05
Q5FWK3	Arhgap1	Rho GTPase-activating protein 1	RHG01_MOUSE	-0.848027	0.165991	0.230311	0.000226354
Q8CGK3	Lonp1	Lon protease homolog, mitochondrial	LONM_MOUSE	1.20964	0.166621	0.231068	9.11371e-06
Q9CPT4	Mydgf	Myeloid-derived growth factor	MYDGF_MOUSE	1.12211	0.167177	0.231721	1.84112e-05
Q78IK2	Atp5md	ATP synthase membrane subunit DAPIT, mitochondrial	ATPMD_MOUSE	1.21269	0.167625	0.232155	4.40103e-05
Q99LI2	Clcc1	Chloride channel CLIC-like protein 1	CLCC1_MOUSE	1.31374	0.167658	0.232155	2.23784e-05
Q60870	Reep5	Receptor expression-enhancing protein 5	REEP5_MOUSE	0.977198	0.169167	0.234126	3.09189e-05
P12382	Pfkl	ATP-dependent 6-phosphofructokinase, liver type	PFKAL_MOUSE	0.925536	0.169384	0.234308	4.38323e-05
Q06185	Atp5me	ATP synthase subunit e, mitochondrial	ATP5I_MOUSE	1.44126	0.170649	0.235941	8.19214e-05
P97447	Fhl1	Four and a half LIM domains protein 1	FHL1_MOUSE	0.718349	0.171013	0.236325	7.23699e-05
P56375	Acyp2	Acylphosphatase-2	ACYP2_MOUSE	1.45016	0.172066	0.237661	4.71799e-05
Q8CGF5	Tlcd4	TLC domain-containing protein 4	TLCD4_MOUSE	0.755959	0.172566	0.238231	0.00148011
Q8K2C9	Hacd3	Very-long-chain (3R)-3-hydroxyacyl-CoA dehydratase 3	HACD3_MOUSE	0.658415	0.173844	0.239875	6.21065e-05
Q9D2G2	Dlst	Dihydrolipoyllysine-residue succinyltransferase component of 2-oxoglutarate dehydrogenase complex, mitochondrial	ODO2_MOUSE	0.569706	0.175252	0.241697	4.36492e-05
Q921T2;Q921T2-2	Tor1aip1	Torsin-1A-interacting protein 1;Isoform 2 of Torsin-1A-interacting protein 1	TOIP1_MOUSE	1.07438	0.176445	0.243221	2.6391e-05
Q9JKD3	Scamp5	Secretory carrier-associated membrane protein 5	SCAM5_MOUSE	0.128363	0.177989	0.245225	0.000315107
O55125	Nipsnap1	Protein NipSnap homolog 1	NIPS1_MOUSE	0.637127	0.179975	0.245991	6.67032e-05
Q9WTK3	Gpaa1	Glycosylphosphatidylinositol anchor attachment 1 protein	GPAA1_MOUSE	2.95439	0.180497	0.245991	0.00221443
Q91YD9	Wasl	Neural Wiskott-Aldrich syndrome protein	WASL_MOUSE	1.27798	0.180622	0.245991	5.49219e-05
[truncated: 751 more rows]

## Sheet: Ctrl_v_APEX_MFB
ProteinAccessions	Genes	ProteinDescriptions	ProteinNames	Log2FC	pvalue	qvalue	Expr
Q9ER00	Stx12	Syntaxin-12	STX12_MOUSE	inf	2.68527e-07	0.000714283	4.54788e-05
Q99PL5	Rrbp1	Ribosome-binding protein 1	RRBP1_MOUSE	inf	1.22069e-06	0.00116846	1.28671e-05
P60840;P60840-2	Ensa	Alpha-endosulfine;Isoform 2 of Alpha-endosulfine	ENSA_MOUSE	inf	1.31781e-06	0.00116846	4.66548e-05
P60122	Ruvbl1	RuvB-like 1	RUVB1_MOUSE	inf	1.77222e-06	0.00117852	9.50032e-06
Q9Z0F7	Sncg	Gamma-synuclein	SYUG_MOUSE	inf	3.59632e-06	0.00144807	0.000240361
Q9DBC7	Prkar1a	cAMP-dependent protein kinase type I-alpha regulatory subunit	KAP0_MOUSE	inf	3.88792e-06	0.00144807	2.06677e-05
Q80VC9;Q80VC9-10;Q80VC9-11;Q80VC9-12;Q80VC9-14;Q80VC9-2;Q80VC9-3;Q80VC9-4;Q80VC9-5	Camsap3	Calmodulin-regulated spectrin-associated protein 3;Isoform 10 of Calmodulin-regulated spectrin-associated protein 3;Isoform 11 of Calmodulin-regulated spectrin-associated protein 3;Isoform 12 of Calmodulin-regulated spectrin-associated protein 3;Isoform 14 of Calmodulin-regulated spectrin-associated protein 3;Isoform 2 of Calmodulin-regulated spectrin-associated protein 3;Isoform 3 of Calmodulin-…	CAMP3_MOUSE	inf	3.91841e-06	0.00144807	1.71409e-05
Q64674	Srm	Spermidine synthase	SPEE_MOUSE	inf	4.35511e-06	0.00144807	1.75925e-05
Q6PER3	Mapre3	Microtubule-associated protein RP/EB family member 3	MARE3_MOUSE	4.23929	5.03099e-06	0.00148694	0.000214132
Q3TMH2	Scrn3	Secernin-3	SCRN3_MOUSE	inf	5.94017e-06	0.00158008	7.02041e-05
O70166	Stmn3	Stathmin-3	STMN3_MOUSE	inf	6.64245e-06	0.00160627	1.03257e-05
Q62277	Syp	Synaptophysin	SYPH_MOUSE	4.91449	7.79029e-06	0.00172685	0.00120649
P97765	Wbp2	WW domain-binding protein 2	WBP2_MOUSE	inf	9.70325e-06	0.00198543	0.000300275
Q9D0B6	Pbdc1	Protein PBDC1	PBDC1_MOUSE	inf	1.12784e-05	0.00205403	1.37544e-05
Q6P9J5	Kank4	KN motif and ankyrin repeat domain-containing protein 4	KANK4_MOUSE	inf	1.17193e-05	0.00205403	1.82512e-05
O88958	Gnpda1	Glucosamine-6-phosphate isomerase 1	GNPI1_MOUSE	inf	1.2355e-05	0.00205403	2.06924e-05
P14873	Map1b	Microtubule-associated protein 1B	MAP1B_MOUSE	4.70379	1.35015e-05	0.00211259	0.000740518
Q6PEV3	Wipf2	WAS/WASL-interacting protein family member 2	WIPF2_MOUSE	inf	1.68326e-05	0.00248748	6.03349e-05
Q9CX00	Ist1	IST1 homolog	IST1_MOUSE	inf	2.33574e-05	0.00270019	2.92987e-05
Q9CR95	Necap1	Adaptin ear-binding coat-associated protein 1	NECP1_MOUSE	inf	2.37331e-05	0.00270019	5.2728e-05
O54834;O54834-2;O54834-3;O54834-4	Arhgap6	Rho GTPase-activating protein 6;Isoform 2 of Rho GTPase-activating protein 6;Isoform 3 of Rho GTPase-activating protein 6;Isoform 4 of Rho GTPase-activating protein 6	RHG06_MOUSE	inf	2.50313e-05	0.00270019	1.11325e-05
Q8R001;Q8R001-2	Mapre2	Microtubule-associated protein RP/EB family member 2;Isoform 2 of Microtubule-associated protein RP/EB family member 2	MARE2_MOUSE	inf	2.68296e-05	0.00270019	8.06163e-05
P34152;P34152-2;P34152-4	Ptk2	Focal adhesion kinase 1;Isoform 2 of Focal adhesion kinase 1;Isoform 4 of Focal adhesion kinase 1	FAK1_MOUSE	inf	2.691e-05	0.00270019	1.33101e-05
Q9D6K5	Synj2bp	Synaptojanin-2-binding protein	SYJ2B_MOUSE	inf	2.7277e-05	0.00270019	2.59832e-05
Q9Z2A0	Pdpk1	3-phosphoinositide-dependent protein kinase 1	PDPK1_MOUSE	inf	2.89045e-05	0.00270019	1.30408e-05
Q8VIM9	Irgq	Immunity-related GTPase family Q protein	IRGQ_MOUSE	inf	2.89646e-05	0.00270019	1.40873e-05
Q9WU78	Pdcd6ip	Programmed cell death 6-interacting protein	PDC6I_MOUSE	2.90662	2.92886e-05	0.00270019	8.02361e-05
Q8R191	Syngr3	Synaptogyrin-3	SNG3_MOUSE	3.8731	3.21506e-05	0.00270019	0.000437311
Q8BLK3	Lsamp	Limbic system-associated membrane protein	LSAMP_MOUSE	inf	3.31834e-05	0.00270019	1.30467e-05
Q78PY7	Snd1	Staphylococcal nuclease domain-containing protein 1	SND1_MOUSE	inf	3.42493e-05	0.00270019	1.65091e-05
Q64327	Mea1	Male-enhanced antigen 1	MEA1_MOUSE	inf	3.60091e-05	0.00270019	7.43328e-06
Q9DAK9	Phpt1	14 kDa phosphohistidine phosphatase	PHP14_MOUSE	inf	3.76046e-05	0.00270019	4.35503e-05
Q9JJZ2	Tuba8	Tubulin alpha-8 chain	TBA8_MOUSE	2.82193	4.0722e-05	0.00270019	0.000312016
Q9DAW9	Cnn3	Calponin-3	CNN3_MOUSE	inf	4.24733e-05	0.00270019	3.7269e-05
P62761	Vsnl1	Visinin-like protein 1	VISL1_MOUSE	3.34287	4.44298e-05	0.00270019	0.000387703
P28656	Nap1l1	Nucleosome assembly protein 1-like 1	NP1L1_MOUSE	inf	4.49415e-05	0.00270019	2.64394e-05
O08967;P63034;P63034-2;P63034-3;Q9QX11;Q9QX11-2	Cyth3;Cyth2;Cyth2;Cyth2;Cyth1;Cyth1	Cytohesin-3;Cytohesin-2;Isoform 2 of Cytohesin-2;Isoform 3 of Cytohesin-2;Cytohesin-1;Isoform 2 of Cytohesin-1	CYH3_MOUSE;CYH2_MOUSE;CYH2_MOUSE;CYH2_MOUSE;CYH1_MOUSE;CYH1_MOUSE	inf	4.53375e-05	0.00270019	1.17756e-05
Q7TN29	Smap2	Stromal membrane-associated protein 2	SMAP2_MOUSE	inf	4.63605e-05	0.00270019	5.63197e-05
Q8BR92	Palm2	Paralemmin-2	PALM2_MOUSE	inf	4.68358e-05	0.00270019	4.56891e-05
Q9QYK7	Rnf11	RING finger protein 11	RNF11_MOUSE	inf	4.75791e-05	0.00270019	2.32707e-05
Q9CQ22	Lamtor1	Ragulator complex protein LAMTOR1	LTOR1_MOUSE	inf	4.77552e-05	0.00270019	1.27572e-05
P16460	Ass1	Argininosuccinate synthase	ASSY_MOUSE	inf	4.79027e-05	0.00270019	1.7745e-05
P53612	Rabggtb	Geranylgeranyl transferase type-2 subunit beta	PGTB2_MOUSE	inf	4.83559e-05	0.00270019	1.35553e-05
Q91YR1	Twf1	Twinfilin-1	TWF1_MOUSE	inf	4.85386e-05	0.00270019	1.08159e-05
Q11136	Pepd	Xaa-Pro dipeptidase	PEPD_MOUSE	inf	4.87761e-05	0.00270019	7.8889e-06
Q99P72	Rtn4	Reticulon-4	RTN4_MOUSE	3.20414	4.97502e-05	0.00270019	0.000228181
Q62083	Pick1	PRKCA-binding protein	PICK1_MOUSE	inf	5.01884e-05	0.00270019	8.1311e-06
Q3UEZ8	Slc10a4	Sodium/bile acid cotransporter 4	NTCP4_MOUSE	inf	5.08972e-05	0.00270019	8.42999e-06
Q99LI8	Hgs	Hepatocyte growth factor-regulated tyrosine kinase substrate	HGS_MOUSE	inf	5.12482e-05	0.00270019	4.14737e-05
Q80YA9	Cnksr2	Connector enhancer of kinase suppressor of ras 2	CNKR2_MOUSE	inf	5.17726e-05	0.00270019	1.34128e-05
P10637-2	Mapt	Isoform Tau-A of Microtubule-associated protein tau	TAU_MOUSE	inf	5.25579e-05	0.00270019	5.35374e-05
Q7TSJ2	Map6	Microtubule-associated protein 6	MAP6_MOUSE	3.24336	5.67899e-05	0.00270019	0.00050584
Q69ZS6	Sv2c	Synaptic vesicle glycoprotein 2C	SV2C_MOUSE	inf	5.70643e-05	0.00270019	6.16064e-05
Q8VHL1	Setd7	Histone-lysine N-methyltransferase SETD7	SETD7_MOUSE	inf	5.75677e-05	0.00270019	2.92514e-05
Q01853	Vcp	Transitional endoplasmic reticulum ATPase	TERA_MOUSE	4.79566	5.87084e-05	0.00270019	0.00031576
Q9QXB9	Drg2	Developmentally-regulated GTP-binding protein 2	DRG2_MOUSE	inf	5.89401e-05	0.00270019	2.14837e-05
P56387	Dynlt3	Dynein light chain Tctex-type 3	DYLT3_MOUSE	inf	5.92196e-05	0.00270019	6.50661e-05
O70439	Stx7	Syntaxin-7	STX7_MOUSE	inf	5.94914e-05	0.00270019	3.47444e-05
Q91YE6	Ipo9	Importin-9	IPO9_MOUSE	inf	5.98915e-05	0.00270019	8.73762e-06
O35526	Stx1a	Syntaxin-1A	STX1A_MOUSE	inf	6.55594e-05	0.00287315	1.30197e-05
O70493	Snx12	Sorting nexin-12	SNX12_MOUSE	inf	6.76402e-05	0.00287315	5.01385e-05
Q8R1Q8	Dync1li1	Cytoplasmic dynein 1 light intermediate chain 1	DC1L1_MOUSE	inf	6.95943e-05	0.00287315	6.44673e-05
O88447	Klc1	Kinesin light chain 1	KLC1_MOUSE	inf	7.05259e-05	0.00287315	3.40562e-05
P35282	Rab21	Ras-related protein Rab-21	RAB21_MOUSE	inf	7.29401e-05	0.00287315	8.61128e-06
Q9JHU2	Palmd	Palmdelphin	PALMD_MOUSE	inf	7.34394e-05	0.00287315	4.09896e-05
Q9JIZ9	Plscr3	Phospholipid scramblase 3	PLS3_MOUSE	inf	7.38215e-05	0.00287315	1.45771e-05
Q9WUK2;Q9WUK2-2	Eif4h	Eukaryotic translation initiation factor 4H;Isoform Short of Eukaryotic translation initiation factor 4H	IF4H_MOUSE	inf	7.54714e-05	0.00287315	5.38097e-05
O08553	Dpysl2	Dihydropyrimidinase-related protein 2	DPYL2_MOUSE	3.90366	7.69681e-05	0.00287315	0.00176138
Q810U3	Nfasc	Neurofascin	NFASC_MOUSE	3.91335	7.82731e-05	0.00287315	0.000153635
Q99KN9	Clint1	Clathrin interactor 1	EPN4_MOUSE	inf	7.93956e-05	0.00287315	3.10596e-05
Q9Z1Z2	Strap	Serine-threonine kinase receptor-associated protein	STRAP_MOUSE	inf	8.12847e-05	0.00287315	1.52673e-05
Q9JKS5	Habp4	Intracellular hyaluronan-binding protein 4	HABP4_MOUSE	inf	8.13155e-05	0.00287315	1.3548e-05
Q8BHL3	Tbc1d10b	TBC1 domain family member 10B	TB10B_MOUSE	inf	8.27752e-05	0.00287315	1.83159e-05
Q9DCS2	Mettl26	Methyltransferase-like 26	MTL26_MOUSE	inf	8.41365e-05	0.00287315	2.44418e-05
A2AG50	Map7d2	MAP7 domain-containing protein 2	MA7D2_MOUSE	inf	8.45056e-05	0.00287315	6.90347e-05
Q501J6	Ddx17	Probable ATP-dependent RNA helicase DDX17	DDX17_MOUSE	inf	8.49828e-05	0.00287315	1.92369e-05
Q8BH93	Mapk1ip1l	MAPK-interacting and spindle-stabilizing protein-like	MISSL_MOUSE	inf	8.72134e-05	0.00287315	3.64695e-05
O54781	Srpk2	SRSF protein kinase 2	SRPK2_MOUSE	inf	8.85456e-05	0.00287315	7.86167e-06
Q9D1K7	Unknown	UPF0687 protein C20orf27 homolog	CT027_MOUSE	inf	8.86099e-05	0.00287315	2.87629e-05
Q8K2K6;Q8K2K6-1;Q8K2K6-3	Agfg1	Arf-GAP domain and FG repeat-containing protein 1;Isoform 1 of Arf-GAP domain and FG repeat-containing protein 1;Isoform 3 of Arf-GAP domain and FG repeat-containing protein 1	AGFG1_MOUSE	inf	9.09366e-05	0.00287315	2.00062e-05
P97797-2	Sirpa	Isoform 2 of Tyrosine-protein phosphatase non-receptor type substrate 1	SHPS1_MOUSE	inf	9.19844e-05	0.00287315	2.28759e-05
O35954	Pitpnm1	Membrane-associated phosphatidylinositol transfer protein 1	PITM1_MOUSE	6.87277	9.25194e-05	0.00287315	2.93096e-05
Q9QYR6;Q9QYR6-2	Map1a	Microtubule-associated protein 1A;Isoform 2 of Microtubule-associated protein 1A	MAP1A_MOUSE	3.96673	9.33425e-05	0.00287315	0.000529926
P53996;P53996-2;P53996-3	Cnbp	Cellular nucleic acid-binding protein;Isoform 2 of Cellular nucleic acid-binding protein;Isoform 3 of Cellular nucleic acid-binding protein	CNBP_MOUSE	inf	9.8245e-05	0.00287315	1.02155e-05
Q61644	Pacsin1	Protein kinase C and casein kinase substrate in neurons protein 1	PACN1_MOUSE	3.03358	9.88925e-05	0.00287315	0.000107092
Q9CT10	Ranbp3	Ran-binding protein 3	RANB3_MOUSE	inf	9.99698e-05	0.00287315	1.59497e-05
P54285	Cacnb3	Voltage-dependent L-type calcium channel subunit beta-3	CACB3_MOUSE	inf	0.000100255	0.00287315	7.5689e-06
Q9R022	Dnajc12	DnaJ homolog subfamily C member 12	DJC12_MOUSE	inf	0.000101611	0.00287315	1.85209e-05
P27546;P27546-2	Map4	Microtubule-associated protein 4;Isoform 2 of Microtubule-associated protein 4	MAP4_MOUSE	2.76952	0.000101613	0.00287315	9.71061e-05
P68037	Ube2l3	Ubiquitin-conjugating enzyme E2 L3	UB2L3_MOUSE	inf	0.000102195	0.00287315	1.80551e-05
Q8BVQ5	Ppme1	Protein phosphatase methylesterase 1	PPME1_MOUSE	inf	0.000102896	0.00287315	4.04988e-05
P24549	Aldh1a1	Retinal dehydrogenase 1	AL1A1_MOUSE	3.22079	0.000103152	0.00287315	8.77566e-05
Q8R5C5	Actr1b	Beta-centractin	ACTY_MOUSE	inf	0.000103338	0.00287315	6.71232e-05
Q921J2	Rheb	GTP-binding protein Rheb	RHEB_MOUSE	inf	0.00010397	0.00287315	1.58278e-05
Q9D7V2	Lysmd2	LysM and putative peptidoglycan-binding domain-containing protein 2	LYSM2_MOUSE	inf	0.000105115	0.00287315	1.6934e-05
Q8BSS9	Ppfia2	Liprin-alpha-2	LIPA2_MOUSE	inf	0.000105492	0.00287315	1.6267e-05
Q8K221	Arfip2	Arfaptin-2	ARFP2_MOUSE	inf	0.000107396	0.00287315	1.44952e-05
Q8K341;Q8K341-3;Q8K341-4	Atat1	Alpha-tubulin N-acetyltransferase 1;Isoform 3 of Alpha-tubulin N-acetyltransferase 1;Isoform 4 of Alpha-tubulin N-acetyltransferase 1	ATAT_MOUSE	inf	0.000108535	0.00287315	2.73503e-05
Q9ERD7	Tubb3	Tubulin beta-3 chain	TBB3_MOUSE	4.05027	0.000108713	0.00287315	0.000348981
Q920M7	Syt17	Synaptotagmin-17	SYT17_MOUSE	inf	0.000109479	0.00287315	1.37467e-05
Q8R4E6;Q8R4E6-2	Purg	Purine-rich element-binding protein gamma;Isoform 2 of Purine-rich element-binding protein gamma	PURG_MOUSE	inf	0.000110567	0.00287315	1.08071e-05
O88545	Cops6	COP9 signalosome complex subunit 6	CSN6_MOUSE	inf	0.000111009	0.00287315	1.33896e-05
Q80VP1;Q80VP1-2	Epn1	Epsin-1;Isoform 2 of Epsin-1	EPN1_MOUSE	inf	0.000113163	0.00287315	4.08011e-05
Q8CH77;Q8CH77-2	Nav1	Neuron navigator 1;Isoform 2 of Neuron navigator 1	NAV1_MOUSE	inf	0.000113535	0.00287315	6.94184e-06
Q8BJI1	Slc6a17	Sodium-dependent neutral amino acid transporter SLC6A17	S6A17_MOUSE	inf	0.000113697	0.00287315	2.14626e-05
Q78JW9	Ubfd1	Ubiquitin domain-containing protein UBFD1	UBFD1_MOUSE	inf	0.000114494	0.00287315	3.04308e-05
Q03141;Q03141-2;Q03141-3	Mark3	MAP/microtubule affinity-regulating kinase 3;Isoform 2 of MAP/microtubule affinity-regulating kinase 3;Isoform 3 of MAP/microtubule affinity-regulating kinase 3	MARK3_MOUSE	inf	0.000116145	0.00288734	2.65306e-05
Q9CR26	Vta1	Vacuolar protein sorting-associated protein VTA1 homolog	VTA1_MOUSE	inf	0.000118203	0.00289059	3.77699e-05
Q91V09	Wdr13	WD repeat-containing protein 13	WDR13_MOUSE	inf	0.000118449	0.00289059	8.20148e-06
Q9CR00	Psmd9	26S proteasome non-ATPase regulatory subunit 9	PSMD9_MOUSE	inf	0.000124984	0.00300666	1.6449e-05
Q3TY60-2	Fam131b	Isoform 2 of Protein FAM131B	F131B_MOUSE	inf	0.000129155	0.00300666	1.19329e-05
O70174	Chrna4	Neuronal acetylcholine receptor subunit alpha-4	ACHA4_MOUSE	inf	0.0001302	0.00300666	6.07725e-06
Q7TSS2;Q7TSS2-2	Ube2q1	Ubiquitin-conjugating enzyme E2 Q1;Isoform 2 of Ubiquitin-conjugating enzyme E2 Q1	UB2Q1_MOUSE	inf	0.000130772	0.00300666	2.84519e-05
Q80WT5;Q80WT5-2	Aftph	Aftiphilin;Isoform 2 of Aftiphilin	AFTIN_MOUSE	inf	0.000131969	0.00300666	9.43357e-06
Q8R4H2	Arhgef12	Rho guanine nucleotide exchange factor 12	ARHGC_MOUSE	inf	0.000132818	0.00300666	5.98983e-06
Q9JI46	Nudt3	Diphosphoinositol polyphosphate phosphohydrolase 1	NUDT3_MOUSE	inf	0.000133037	0.00300666	4.54917e-05
P22682	Cbl	E3 ubiquitin-protein ligase CBL	CBL_MOUSE	inf	0.000133174	0.00300666	1.26165e-05
Q78YZ6;Q78YZ6-2;Q78YZ6-3	Scoc	Short coiled-coil protein;Isoform 2 of Short coiled-coil protein;Isoform 3 of Short coiled-coil protein	SCOC_MOUSE	inf	0.000134536	0.00300666	1.16454e-05
Q8C437;Q8C437-3	Pex5l	PEX5-related protein;Isoform 3 of PEX5-related protein	PEX5R_MOUSE	inf	0.000134619	0.00300666	3.84766e-05
Q3UMR5	Mcu	Calcium uniporter protein, mitochondrial	MCU_MOUSE	inf	0.000136876	0.00300666	2.46186e-05
Q8VE47	Uba5	Ubiquitin-like modifier-activating enzyme 5	UBA5_MOUSE	inf	0.000137901	0.00300666	2.34139e-05
Q7TSC1	Prrc2a	Protein PRRC2A	PRC2A_MOUSE	inf	0.000137986	0.00300666	1.22439e-05
A2AJI0	Map7d1	MAP7 domain-containing protein 1	MA7D1_MOUSE	inf	0.000140424	0.00300666	2.80109e-05
Q3UUF8	Ankrd34b	Ankyrin repeat domain-containing protein 34B	AN34B_MOUSE	inf	0.00014083	0.00300666	6.2627e-05
Q9QYF9	Ndrg3	Protein NDRG3	NDRG3_MOUSE	inf	0.000142792	0.00300666	2.17304e-05
Q9EQP2	Ehd4	EH domain-containing protein 4	EHD4_MOUSE	inf	0.000143383	0.00300666	1.79756e-05
Q99KC8	Vwa5a	von Willebrand factor A domain-containing protein 5A	VMA5A_MOUSE	inf	0.000143551	0.00300666	3.23257e-05
P43407	Sdc2	Syndecan-2	SDC2_MOUSE	inf	0.000145768	0.00302923	3.79766e-06
P97370	Atp1b3	Sodium/potassium-transporting ATPase subunit beta-3	AT1B3_MOUSE	inf	0.000149686	0.00308655	9.1846e-06
Q9JJV2	Pfn2	Profilin-2	PROF2_MOUSE	3.02243	0.000151079	0.00309131	0.000263881
Q60598	Cttn	Src substrate cortactin	SRC8_MOUSE	3.05584	0.000153566	0.00311293	0.00014977
Q62188	Dpysl3	Dihydropyrimidinase-related protein 3	DPYL3_MOUSE	3.62389	0.000155247	0.00311293	0.00102385
Q8CHP5;Q8CHP5-2	Pym1	Partner of Y14 and mago;Isoform 2 of Partner of Y14 and mago	PYM1_MOUSE	inf	0.000155646	0.00311293	1.03903e-05
P63037	Dnaja1	DnaJ homolog subfamily A member 1	DNJA1_MOUSE	inf	0.00016213	0.00311541	3.16949e-05
Q5SVL6	Rap1gap2	Rap1 GTPase-activating protein 2	RPGP2_MOUSE	inf	0.000163254	0.00311541	2.14729e-05
Q8R1X6;Q8R1X6-2	Spart	Spartin;Isoform 2 of Spartin	SPART_MOUSE	inf	0.000164299	0.00311541	5.739e-06
P10637	Mapt	Microtubule-associated protein tau	TAU_MOUSE	3.67377	0.00016555	0.00311541	0.000597468
Q8BRU6	Slc18a2	Synaptic vesicular amine transporter	VMAT2_MOUSE	inf	0.000165554	0.00311541	7.11048e-05
O35226;O35226-2	Psmd4	26S proteasome non-ATPase regulatory subunit 4;Isoform Rpn10B of 26S proteasome non-ATPase regulatory subunit 4	PSMD4_MOUSE	inf	0.000165661	0.00311541	1.35588e-05
P62331	Arf6	ADP-ribosylation factor 6	ARF6_MOUSE	inf	0.000166463	0.00311541	4.65983e-05
Q922F4	Tubb6	Tubulin beta-6 chain	TBB6_MOUSE	3.65847	0.000166962	0.00311541	0.00142281
Q8BWY3	Etf1	Eukaryotic peptide chain release factor subunit 1	ERF1_MOUSE	inf	0.000168053	0.00311541	1.35038e-05
Q9D7X3	Dusp3	Dual specificity protein phosphatase 3	DUS3_MOUSE	inf	0.000168996	0.00311541	6.93621e-06
P70297	Stam	Signal transducing adapter molecule 1	STAM1_MOUSE	inf	0.000169981	0.00311541	3.45654e-05
Q62417;Q62417-2	Sorbs1	Sorbin and SH3 domain-containing protein 1;Isoform 2 of Sorbin and SH3 domain-containing protein 1	SRBS1_MOUSE	inf	0.000170772	0.00311541	1.20456e-05
P47753	Capza1	F-actin-capping protein subunit alpha-1	CAZA1_MOUSE	inf	0.00017256	0.00311541	3.23496e-05
Q91VI7	Rnh1	Ribonuclease inhibitor	RINI_MOUSE	inf	0.000172666	0.00311541	3.61682e-05
O54829	Rgs7	Regulator of G-protein signaling 7	RGS7_MOUSE	inf	0.000173339	0.00311541	3.23449e-05
A2A699	Fam171a2	Protein FAM171A2	F1712_MOUSE	inf	0.000175047	0.00312499	7.50181e-06
Q8BGZ1	Hpcal4	Hippocalcin-like protein 4	HPCL4_MOUSE	2.58173	0.000177071	0.00314006	0.000473855
Q9CPX6	Atg3	Ubiquitin-like-conjugating enzyme ATG3	ATG3_MOUSE	inf	0.000183019	0.00316145	1.08612e-05
Q64519	Sdc3	Syndecan-3	SDC3_MOUSE	inf	0.000184308	0.00316145	1.70587e-05
P59108	Cpne2	Copine-2	CPNE2_MOUSE	inf	0.000184541	0.00316145	2.15711e-05
O88533	Ddc	Aromatic-L-amino-acid decarboxylase	DDC_MOUSE	inf	0.000185604	0.00316145	0.000209137
Q06138	Cab39	Calcium-binding protein 39	CAB39_MOUSE	inf	0.000185668	0.00316145	1.86006e-05
Q9QXY6	Ehd3	EH domain-containing protein 3	EHD3_MOUSE	inf	0.000186983	0.00316145	2.52116e-05
P60766-1	Cdc42	Isoform 1 of Cell division control protein 42 homolog	CDC42_MOUSE	inf	0.000187082	0.00316145	3.72419e-05
Q9CQW1	Ykt6	Synaptobrevin homolog YKT6	YKT6_MOUSE	inf	0.000193096	0.00316145	1.28689e-05
Q9DC07	Nebl	LIM zinc-binding domain-containing Nebulette	LNEBL_MOUSE	inf	0.000194406	0.00316145	1.67419e-05
P27546-4	Map4	Isoform 4 of Microtubule-associated protein 4	MAP4_MOUSE	3.44681	0.000195718	0.00316145	5.41333e-05
P97372	Psme2	Proteasome activator complex subunit 2	PSME2_MOUSE	inf	0.000195789	0.00316145	1.58421e-05
Q6PH08	Erc2	ERC protein 2	ERC2_MOUSE	inf	0.000196024	0.00316145	3.35413e-05
Q61548;Q61548-2;Q61548-3	Snap91	Clathrin coat assembly protein AP180;Isoform Short of Clathrin coat assembly protein AP180;Isoform 3 of Clathrin coat assembly protein AP180	AP180_MOUSE	2.88035	0.000196541	0.00316145	0.000140214
P62827	Ran	GTP-binding nuclear protein Ran	RAN_MOUSE	1.92473	0.000196607	0.00316145	9.46636e-05
Q61249	Igbp1	Immunoglobulin-binding protein 1	IGBP1_MOUSE	inf	0.000196857	0.00316145	1.25025e-05
Q3THS6	Mat2a	S-adenosylmethionine synthase isoform type-2	METK2_MOUSE	inf	0.000198243	0.00316145	1.08283e-05
Q8JZW8	Pnma3	Paraneoplastic antigen Ma3 homolog	PNMA3_MOUSE	3.95476	0.000198482	0.00316145	0.00540906
P04627	Araf	Serine/threonine-protein kinase A-Raf	ARAF_MOUSE	inf	0.000203593	0.00322356	2.33728e-05
Q8CBY8;Q8CBY8-2	Dctn4	Dynactin subunit 4;Isoform 2 of Dynactin subunit 4	DCTN4_MOUSE	inf	0.000210046	0.00329892	2.8288e-05
P40694	Ighmbp2	DNA-binding protein SMUBP-2	SMBP2_MOUSE	inf	0.000211937	0.00329892	2.11001e-05
Q3UHC7;Q3UHC7-2;Q3UHC7-3;Q3UHC7-4	Dab2ip	Disabled homolog 2-interacting protein;Isoform 2 of Disabled homolog 2-interacting protein;Isoform 3 of Disabled homolog 2-interacting protein;Isoform 4 of Disabled homolog 2-interacting protein	DAB2P_MOUSE	inf	0.00021231	0.00329892	2.95362e-05
Q8VE62	Paip1	Polyadenylate-binding protein-interacting protein 1	PAIP1_MOUSE	inf	0.000213314	0.00329892	2.54454e-05
Q8VHH5	Agap3	Arf-GAP with GTPase, ANK repeat and PH domain-containing protein 3	AGAP3_MOUSE	inf	0.000215549	0.00331422	2.78418e-05
P70290	Mpp1	55 kDa erythrocyte membrane protein	EM55_MOUSE	inf	0.000219391	0.00335351	2.64886e-05
Q6A065	Cep170	Centrosomal protein of 170 kDa	CE170_MOUSE	inf	0.000220946	0.00335351	2.95885e-05
Q80TR1;Q80TR1-2	Adgrl1	Adhesion G protein-coupled receptor L1;Isoform 2 of Adhesion G protein-coupled receptor L1	AGRL1_MOUSE	inf	0.000221886	0.00335351	2.60347e-05
Q8VDQ1;Q8VDQ1-2	Ptgr2	Prostaglandin reductase 2;Isoform 2 of Prostaglandin reductase 2	PTGR2_MOUSE	inf	0.000227265	0.0033838	2.07493e-05
Q8CI08;Q8CI08-2	Slain2	SLAIN motif-containing protein 2;Isoform 2 of SLAIN motif-containing protein 2	SLAI2_MOUSE	inf	0.000228431	0.0033838	4.50903e-06
P55821	Stmn2	Stathmin-2	STMN2_MOUSE	inf	0.000228649	0.0033838	2.30126e-05
Q9CXW3	Cacybp	Calcyclin-binding protein	CYBP_MOUSE	inf	0.000229641	0.0033838	5.65448e-05
Q91Z61	Diras1	GTP-binding protein Di-Ras1	DIRA1_MOUSE	inf	0.000230251	0.0033838	3.56027e-05
P00493	Hprt1	Hypoxanthine-guanine phosphoribosyltransferase	HPRT_MOUSE	inf	0.000234193	0.00342281	4.38149e-05
Q61189	Clns1a	Methylosome subunit pICln	ICLN_MOUSE	inf	0.000238018	0.00342609	1.8706e-05
Q6NVE8	Wdr44	WD repeat-containing protein 44	WDR44_MOUSE	inf	0.000238196	0.00342609	1.51271e-05
P62484	Abi2	Abl interactor 2	ABI2_MOUSE	inf	0.000238466	0.00342609	1.94512e-05
Q91XF0	Pnpo	Pyridoxine-5'-phosphate oxidase	PNPO_MOUSE	inf	0.000239569	0.00342609	2.16867e-05
Q925T6;Q925T6-2;Q925T6-3;Q925T6-4	Grip1	Glutamate receptor-interacting protein 1;Isoform 2 of Glutamate receptor-interacting protein 1;Isoform 3 of Glutamate receptor-interacting protein 1;Isoform 4 of Glutamate receptor-interacting protein 1	GRIP1_MOUSE	inf	0.000246704	0.00347721	1.63536e-05
Q61140	Bcar1	Breast cancer anti-estrogen resistance protein 1	BCAR1_MOUSE	inf	0.000247013	0.00347721	1.36062e-05
Q9JJR9	Nrip3	Nuclear receptor-interacting protein 3	NRIP3_MOUSE	inf	0.000248365	0.00347721	1.44453e-05
P60469	Ppfia3	Liprin-alpha-3	LIPA3_MOUSE	inf	0.000248372	0.00347721	8.14965e-06
Q99P47	Cntnap4	Contactin-associated protein-like 4	CNTP4_MOUSE	inf	0.000251697	0.00350531	1.95016e-05
O88448	Klc2	Kinesin light chain 2	KLC2_MOUSE	inf	0.000256067	0.00351264	2.88168e-05
Q8BLR2	Cpne4	Copine-4	CPNE4_MOUSE	inf	0.000258035	0.00351264	1.32537e-05
Q9ESM3	Hapln2	Hyaluronan and proteoglycan link protein 2	HPLN2_MOUSE	inf	0.000258683	0.00351264	0.000587027
P63087;P63087-2	Ppp1cc	Serine/threonine-protein phosphatase PP1-gamma catalytic subunit;Isoform 2 of Serine/threonine-protein phosphatase PP1-gamma catalytic subunit	PP1G_MOUSE	inf	0.000260397	0.00351264	1.76517e-05
Q2NL51	Gsk3a	Glycogen synthase kinase-3 alpha	GSK3A_MOUSE	inf	0.000260946	0.00351264	0.000438927
P61164	Actr1a	Alpha-centractin	ACTZ_MOUSE	inf	0.000261439	0.00351264	3.09669e-05
O09012;O09012-2	Pex5	Peroxisomal targeting signal 1 receptor;Isoform 2 of Peroxisomal targeting signal 1 receptor	PEX5_MOUSE	inf	0.000262018	0.00351264	1.33675e-05
Q9ERR1	Ndel1	Nuclear distribution protein nudE-like 1	NDEL1_MOUSE	inf	0.00026376	0.00351264	1.78077e-05
Q9CQ65	Mtap	S-methyl-5'-thioadenosine phosphorylase	MTAP_MOUSE	inf	0.000264108	0.00351264	1.13312e-05
P47809	Map2k4	Dual specificity mitogen-activated protein kinase kinase 4	MP2K4_MOUSE	inf	0.00026603	0.0035206	1.61216e-05
Q9DBR7;Q9DBR7-2	Ppp1r12a	Protein phosphatase 1 regulatory subunit 12A;Isoform 2 of Protein phosphatase 1 regulatory subunit 12A	MYPT1_MOUSE	inf	0.000274799	0.00361864	1.02995e-05
Q91XV3	Basp1	Brain acid soluble protein 1	BASP1_MOUSE	3.12999	0.000280545	0.00366693	0.000190695
Q9D6Y9	Gbe1	1,4-alpha-glucan-branching enzyme	GLGB_MOUSE	inf	0.000281223	0.00366693	3.13501e-05
Q3TJZ6	Fam98a	Protein FAM98A	FA98A_MOUSE	inf	0.000285067	0.00369892	1.34221e-05
Q91W50	Csde1	Cold shock domain-containing protein E1	CSDE1_MOUSE	inf	0.000294914	0.00380811	2.59731e-05
Q9QZ06	Tollip	Toll-interacting protein	TOLIP_MOUSE	inf	0.000296624	0.00381169	2.54708e-05
Q7TNG5	Eml2	Echinoderm microtubule-associated protein-like 2	EMAL2_MOUSE	inf	0.000298797	0.00382115	3.78142e-05
P61021	Rab5b	Ras-related protein Rab-5B	RAB5B_MOUSE	inf	0.000305566	0.00388902	3.61261e-05
P42232	Stat5b	Signal transducer and activator of transcription 5B	STA5B_MOUSE	inf	0.000312497	0.00392606	1.33637e-05
Q64010	Crk	Adapter molecule crk	CRK_MOUSE	inf	0.000312762	0.00392606	1.07813e-05
Q8CHG7	Rapgef2	Rap guanine nucleotide exchange factor 2	RPGF2_MOUSE	inf	0.000312904	0.00392606	8.92867e-06
Q8C0D4	Arhgap12	Rho GTPase-activating protein 12	RHG12_MOUSE	inf	0.000315742	0.00394306	6.0872e-06
Q8BHL8	Psmf1	Proteasome inhibitor PI31 subunit	PSMF1_MOUSE	inf	0.000322271	0.00399965	1.46956e-05
Q8K4G5-2;Q8K4G5-4	Ablim1	Isoform 2 of Actin-binding LIM protein 1;Isoform 4 of Actin-binding LIM protein 1	ABLM1_MOUSE	inf	0.00032328	0.00399965	2.00179e-05
Q8VHJ5	Mark1	Serine/threonine-protein kinase MARK1	MARK1_MOUSE	inf	0.000325295	0.00400562	1.21787e-05
Q811I0	Atpaf1	ATP synthase mitochondrial F1 complex assembly factor 1	ATPF1_MOUSE	inf	0.000326775	0.00400562	5.21553e-06
P05213	Tuba1b	Tubulin alpha-1B chain	TBA1B_MOUSE	3.75387	0.000330803	0.00402173	0.00460261
P05064	Aldoa	Fructose-bisphosphate aldolase A	ALDOA_MOUSE	2.59869	0.000331434	0.00402173	0.00060437
P12815	Pdcd6	Programmed cell death protein 6	PDCD6_MOUSE	inf	0.000332624	0.00402173	2.70987e-05
Q80X50;Q80X50-2;Q80X50-3;Q80X50-4;Q80X50-5	Ubap2l	Ubiquitin-associated protein 2-like;Isoform 2 of Ubiquitin-associated protein 2-like;Isoform 3 of Ubiquitin-associated protein 2-like;Isoform 4 of Ubiquitin-associated protein 2-like;Isoform 5 of Ubiquitin-associated protein 2-like	UBP2L_MOUSE	inf	0.00033787	0.00404885	1.54952e-05
Q3V3V9-2	Carmil2	Isoform 2 of Capping protein, Arp2/3 and myosin-I linker protein 2	CARL2_MOUSE	inf	0.000337911	0.00404885	5.57136e-06
Q3UGY8	Arfgef3	Brefeldin A-inhibited guanine nucleotide-exchange protein 3	BIG3_MOUSE	inf	0.000350665	0.00418282	1.5497e-05
P42932	Cct8	T-complex protein 1 subunit theta	TCPQ_MOUSE	2.79424	0.000355053	0.00421626	8.49761e-05
Q6PGH2	Jpt2	Jupiter microtubule associated homolog 2	JUPI2_MOUSE	inf	0.000359031	0.0042289	1.96122e-05
Q5M8N0	Cnrip1	CB1 cannabinoid receptor-interacting protein 1	CNRP1_MOUSE	inf	0.000359579	0.0042289	1.759e-05
Q9JKV1	Adrm1	Proteasomal ubiquitin receptor ADRM1	ADRM1_MOUSE	inf	0.000361875	0.0042289	1.76868e-05
Q921F2	Tardbp	TAR DNA-binding protein 43	TADBP_MOUSE	inf	0.000363511	0.0042289	1.02272e-05
Q00612	G6pdx	Glucose-6-phosphate 1-dehydrogenase X	G6PD1_MOUSE	inf	0.00036434	0.0042289	2.06364e-05
Q8CCT4	Tceal5	Transcription elongation factor A protein-like 5	TCAL5_MOUSE	inf	0.00036625	0.0042289	6.94015e-06
Q80TY0;Q80TY0-2;Q80TY0-3	Fnbp1	Formin-binding protein 1;Isoform 2 of Formin-binding protein 1;Isoform 3 of Formin-binding protein 1	FNBP1_MOUSE	inf	0.000367247	0.0042289	1.56794e-05
P62196	Psmc5	26S proteasome regulatory subunit 8	PRS8_MOUSE	inf	0.000376426	0.00431591	1.07538e-05
Q9D819	Ppa1	Inorganic pyrophosphatase	IPYR_MOUSE	6.75138	0.000378294	0.00431872	4.19352e-05
Q6PCP5	Mff	Mitochondrial fission factor	MFF_MOUSE	inf	0.000386881	0.00435991	1.51466e-05
Q3UH66-3;Q3UH66-4;Q3UH66-5;Q3UH66-6;Q3UH66-7	Wnk2	Isoform 3 of Serine/threonine-protein kinase WNK2;Isoform 4 of Serine/threonine-protein kinase WNK2;Isoform 5 of Serine/threonine-protein kinase WNK2;Isoform 6 of Serine/threonine-protein kinase WNK2;Isoform 7 of Serine/threonine-protein kinase WNK2	WNK2_MOUSE	inf	0.000387493	0.00435991	2.16687e-05
P61226	Rap2b	Ras-related protein Rap-2b	RAP2B_MOUSE	inf	0.000388246	0.00435991	1.16701e-05
Q6PHZ8;Q6PHZ8-2;Q6PHZ8-3;Q6PHZ8-4	Kcnip4	Kv channel-interacting protein 4;Isoform 2 of Kv channel-interacting protein 4;Isoform 3 of Kv channel-interacting protein 4;Isoform 4 of Kv channel-interacting protein 4	KCIP4_MOUSE	inf	0.000388458	0.00435991	1.77028e-05
Q9R0N7-4	Syt7	Isoform 4 of Synaptotagmin-7	SYT7_MOUSE	inf	0.000394061	0.00437782	1.9927e-05
A2ALS5;A2ALS5-2;A2ALS5-3	Rap1gap	Rap1 GTPase-activating protein 1;Isoform 2 of Rap1 GTPase-activating protein 1;Isoform 3 of Rap1 GTPase-activating protein 1	RPGP1_MOUSE	inf	0.000394506	0.00437782	2.40696e-05
Q9D1K2	Atp6v1f	V-type proton ATPase subunit F	VATF_MOUSE	inf	0.000394991	0.00437782	1.52918e-05
Q9JI75	Nqo2	Ribosyldihydronicotinamide dehydrogenase [quinone]	NQO2_MOUSE	inf	0.000401654	0.00442816	5.05887e-06
P54775	Psmc4	26S proteasome regulatory subunit 6B	PRS6B_MOUSE	inf	0.000402863	0.00442816	1.55086e-05
Q8CIN4	Pak2	Serine/threonine-protein kinase PAK 2	PAK2_MOUSE	inf	0.000409498	0.00448257	2.93497e-05
Q9Z0H8	Clip2	CAP-Gly domain-containing linker protein 2	CLIP2_MOUSE	inf	0.000413436	0.00450174	1.13391e-05
O35495;O35495-2	Cdk14	Cyclin-dependent kinase 14;Isoform 2 of Cyclin-dependent kinase 14	CDK14_MOUSE	inf	0.000414634	0.00450174	1.77419e-05
Q6ZQ58	Larp1	La-related protein 1	LARP1_MOUSE	inf	0.000417335	0.00451264	2.18666e-05
P17156	Hspa2	Heat shock-related 70 kDa protein 2	HSP72_MOUSE	inf	0.00041934	0.00451553	9.42666e-06
Q8K212	Pacs1	Phosphofurin acidic cluster sorting protein 1	PACS1_MOUSE	inf	0.000420997	0.00451553	1.93646e-05
P12849	Prkar1b	cAMP-dependent protein kinase type I-beta regulatory subunit	KAP1_MOUSE	inf	0.000427737	0.00456675	1.13011e-05
P32921;P32921-2	Wars1	Tryptophan--tRNA ligase, cytoplasmic;Isoform 2 of Tryptophan--tRNA ligase, cytoplasmic	SYWC_MOUSE	inf	0.000431214	0.00456675	1.37338e-05
P24529	Th	Tyrosine 3-monooxygenase	TY3H_MOUSE	inf	0.000433415	0.00456675	0.000189185
Q8R0S2;Q8R0S2-2	Iqsec1	IQ motif and SEC7 domain-containing protein 1;Isoform 2 of IQ motif and SEC7 domain-containing protein 1	IQEC1_MOUSE	3.32847	0.000433697	0.00456675	7.09758e-05
P10637-3;P10637-4	Mapt	Isoform Tau-B of Microtubule-associated protein tau;Isoform Tau-C of Microtubule-associated protein tau	TAU_MOUSE	2.4989	0.000434356	0.00456675	0.000163463
Q8CBC4	Cnst	Consortin	CNST_MOUSE	inf	0.000436992	0.00457638	1.13817e-05
Q8C7R4	Uba6	Ubiquitin-like modifier-activating enzyme 6	UBA6_MOUSE	inf	0.00044218	0.00461254	1.13651e-05
Q9D5V6	Syap1	Synapse-associated protein 1	SYAP1_MOUSE	inf	0.000444493	0.00461856	1.32924e-05
P61087	Ube2k	Ubiquitin-conjugating enzyme E2 K	UBE2K_MOUSE	inf	0.000448127	0.00461916	1.10867e-05
Q3TYX3	Smyd5	SET and MYND domain-containing protein 5	SMYD5_MOUSE	inf	0.00044879	0.00461916	1.31699e-05
Q62261	Sptbn1	Spectrin beta chain, non-erythrocytic 1	SPTB2_MOUSE	2.77699	0.00044976	0.00461916	0.000271899
Q61187	Tsg101	Tumor susceptibility gene 101 protein	TS101_MOUSE	inf	0.000453473	0.00463861	2.66251e-05
P62482	Kcnab2	Voltage-gated potassium channel subunit beta-2	KCAB2_MOUSE	2.96339	0.000456455	0.00463861	7.67462e-05
Q8CIQ7	Dock3	Dedicator of cytokinesis protein 3	DOCK3_MOUSE	inf	0.000456886	0.00463861	1.52976e-05
Q9EPU0;Q9EPU0-2	Upf1	Regulator of nonsense transcripts 1;Isoform 2 of Regulator of nonsense transcripts 1	RENT1_MOUSE	inf	0.000462849	0.00464955	1.73695e-05
P61082	Ube2m	NEDD8-conjugating enzyme Ubc12	UBC12_MOUSE	5.64719	0.000464384	0.00464955	1.84154e-05
Q68FD5	Cltc	Clathrin heavy chain 1	CLH1_MOUSE	3.7052	0.000465969	0.00464955	0.000323636
P80317	Cct6a	T-complex protein 1 subunit zeta	TCPZ_MOUSE	1.87466	0.000466685	0.00464955	3.27919e-05
Q9WUA2	Farsb	Phenylalanine--tRNA ligase beta subunit	SYFB_MOUSE	inf	0.000468549	0.00464955	6.13455e-06
Q99K70	Rragc	Ras-related GTP-binding protein C	RRAGC_MOUSE	inf	0.000469478	0.00464955	4.26147e-05
P60766	Cdc42	Cell division control protein 42 homolog	CDC42_MOUSE	2.08816	0.000470199	0.00464955	6.88243e-05
Q8BH44	Coro2b	Coronin-2B	COR2B_MOUSE	inf	0.000481324	0.00474193	1.01305e-05
Q6ZQ18	Efr3b	Protein EFR3 homolog B	EFR3B_MOUSE	inf	0.000489946	0.00479389	1.4935e-05
P60229	Eif3e	Eukaryotic translation initiation factor 3 subunit E	EIF3E_MOUSE	inf	0.00049057	0.00479389	1.46915e-05
Q63810;Q63810-2	Ppp3r1	Calcineurin subunit B type 1;Isoform 2 of Calcineurin subunit B type 1	CANB1_MOUSE	1.93193	0.000492004	0.00479389	6.40902e-05
P47708	Rph3a	Rabphilin-3A	RP3A_MOUSE	2.84057	0.000496256	0.00481766	4.24457e-05
P05132;P05132-2	Prkaca	cAMP-dependent protein kinase catalytic subunit alpha;Isoform 2 of cAMP-dependent protein kinase catalytic subunit alpha	KAPCA_MOUSE	inf	0.000500093	0.00482032	1.48371e-05
Q9ET26	Rnf114	E3 ubiquitin-protein ligase RNF114	RN114_MOUSE	inf	0.000500957	0.00482032	1.02208e-05
Q8BHK2	Scn3b	Sodium channel subunit beta-3	SCN3B_MOUSE	inf	0.000501966	0.00482032	3.13746e-05
Q9QZM0	Ubqln2	Ubiquilin-2	UBQL2_MOUSE	inf	0.000505052	0.00483251	2.19147e-05
O89112	Lancl1	Glutathione S-transferase LANCL1	LANC1_MOUSE	inf	0.00051148	0.00487647	3.63997e-05
P33173	Kif1a	Kinesin-like protein KIF1A	KIF1A_MOUSE	inf	0.000516969	0.00491121	3.49049e-05
Q8K0G5	Eipr1	EARP and GARP complex-interacting protein 1	EIPR1_MOUSE	inf	0.000521733	0.00493883	1.13551e-05
Q9JLB0-2	Mpp6	Isoform Alpha of MAGUK p55 subfamily member 6	MPP6_MOUSE	inf	0.000523886	0.00494162	0.000112852
Q8BGB7;Q8BGB7-2	Enoph1	Enolase-phosphatase E1;Isoform 2 of Enolase-phosphatase E1	ENOPH_MOUSE	inf	0.000527924	0.00495375	1.52376e-05
Q80U56	Avl9	Late secretory pathway protein AVL9 homolog	AVL9_MOUSE	inf	0.000528897	0.00495375	9.34355e-06
Q62172	Ralbp1	RalA-binding protein 1	RBP1_MOUSE	inf	0.000530898	0.00495504	2.22627e-05
Q8R317;Q8R317-2	Ubqln1	Ubiquilin-1;Isoform 2 of Ubiquilin-1	UBQL1_MOUSE	inf	0.000533725	0.00496111	1.87185e-05
P62715	Ppp2cb	Serine/threonine-protein phosphatase 2A catalytic subunit beta isoform	PP2AB_MOUSE	inf	0.000535278	0.00496111	2.01446e-05
Q922Q1	Mtarc2	Mitochondrial amidoxime reducing component 2	MARC2_MOUSE	inf	0.00054083	0.00499517	1.21683e-05
Q9D0I9	Rars1	Arginine--tRNA ligase, cytoplasmic	SYRC_MOUSE	inf	0.000545044	0.00501667	7.39224e-06
Q62432;Q62432-2	Smad2	Mothers against decapentaplegic homolog 2;Isoform Short of Mothers against decapentaplegic homolog 2	SMAD2_MOUSE	inf	0.000552469	0.00506263	9.48765e-06
Q3UYG8	Macrod2	ADP-ribose glycohydrolase MACROD2	MACD2_MOUSE	inf	0.000555267	0.00506263	6.0856e-06
Q99MK8	Grk2	Beta-adrenergic receptor kinase 1	ARBK1_MOUSE	inf	0.000556614	0.00506263	1.74747e-05
Q8BU31	Rap2c	Ras-related protein Rap-2c	RAP2C_MOUSE	inf	0.00055765	0.00506263	1.30669e-05
P97427	Crmp1	Dihydropyrimidinase-related protein 1	DPYL1_MOUSE	2.66031	0.00055965	0.0050635	0.000613646
P60824	Cirbp	Cold-inducible RNA-binding protein	CIRBP_MOUSE	inf	0.000567262	0.00506379	1.30743e-05
Q6PA06	Atl2	Atlastin-2	ATLA2_MOUSE	inf	0.000568693	0.00506379	2.2398e-05
Q9ERB0	Snap29	Synaptosomal-associated protein 29	SNP29_MOUSE	inf	0.00056966	0.00506379	8.52888e-06
P28028	Braf	Serine/threonine-protein kinase B-raf	BRAF_MOUSE	inf	0.000570451	0.00506379	1.45226e-05
Q8K3E5	Ahi1	Jouberin	AHI1_MOUSE	inf	0.000570859	0.00506379	1.18457e-05
Q80WC7;Q80WC7-2	Agfg2	Arf-GAP domain and FG repeat-containing protein 2;Isoform 2 of Arf-GAP domain and FG repeat-containing protein 2	AGFG2_MOUSE	inf	0.000571104	0.00506379	1.44686e-05
P51141	Dvl1	Segment polarity protein dishevelled homolog DVL-1	DVL1_MOUSE	inf	0.000576192	0.00509193	7.87323e-06
Q9JKY5	Hip1r	Huntingtin-interacting protein 1-related protein	HIP1R_MOUSE	inf	0.000582122	0.00510242	1.57346e-05
Q9DBL7	Coasy	Bifunctional coenzyme A synthase	COASY_MOUSE	inf	0.000582802	0.00510242	1.5711e-05
Q9CY50	Ssr1	Translocon-associated protein subunit alpha	SSRA_MOUSE	inf	0.000583134	0.00510242	1.36039e-05
Q8C419	Gpr158	Probable G-protein coupled receptor 158	GP158_MOUSE	2.44555	0.00058784	0.00512661	9.33771e-05
P97379	G3bp2	Ras GTPase-activating protein-binding protein 2	G3BP2_MOUSE	inf	0.000589753	0.00512661	2.94508e-05
P61329;P61329-2	Fgf12	Fibroblast growth factor 12;Isoform 2 of Fibroblast growth factor 12	FGF12_MOUSE	inf	0.000597903	0.00518053	3.88793e-05
P63085	Mapk1	Mitogen-activated protein kinase 1	MK01_MOUSE	3.44156	0.000603498	0.00521203	9.45194e-05
Q5RJI5	Brsk1	Serine/threonine-protein kinase BRSK1	BRSK1_MOUSE	inf	0.000610055	0.00523817	1.14332e-05
Q9R0P9	Uchl1	Ubiquitin carboxyl-terminal hydrolase isozyme L1	UCHL1_MOUSE	2.28654	0.000610464	0.00523817	0.000161046
Q9D4H8	Cul2	Cullin-2	CUL2_MOUSE	inf	0.000618675	0.00529156	1.52825e-05
Q9Z1W9	Stk39	STE20/SPS1-related proline-alanine-rich protein kinase	STK39_MOUSE	inf	0.000622183	0.00530451	1.1688e-05
P12658	Calb1	Calbindin	CALB1_MOUSE	inf	0.000627889	0.00533605	3.97427e-05
Q8R307	Vps18	Vacuolar protein sorting-associated protein 18 homolog	VPS18_MOUSE	inf	0.000630044	0.00533732	1.44674e-05
Q9CQD1	Rab5a	Ras-related protein Rab-5A	RAB5A_MOUSE	2.57268	0.000634917	0.00536152	0.000150528
Q8BG92	Clvs2	Clavesin-2	CLVS2_MOUSE	inf	0.000664364	0.00557751	7.04996e-06
Q3TVA9;Q3TVA9-2	Ccdc136	Coiled-coil domain-containing protein 136;Isoform 2 of Coiled-coil domain-containing protein 136	CC136_MOUSE	inf	0.000664688	0.00557751	8.94913e-06
Q9DBE8	Alg2	Alpha-1,3/1,6-mannosyltransferase ALG2	ALG2_MOUSE	inf	0.000670909	0.0056033	2.5533e-05
Q91VM9;Q91VM9-2	Ppa2	Inorganic pyrophosphatase 2, mitochondrial;Isoform 2 of Inorganic pyrophosphatase 2, mitochondrial	IPYR2_MOUSE	inf	0.00067257	0.0056033	9.85693e-06
Q7TMM9	Tubb2a	Tubulin beta-2A chain	TBB2A_MOUSE	3.34753	0.000675266	0.0056033	0.00211943
P33175	Kif5a	Kinesin heavy chain isoform 5A	KIF5A_MOUSE	inf	0.000676188	0.0056033	2.03391e-05
O35344	Kpna3	Importin subunit alpha-4	IMA4_MOUSE	inf	0.000679278	0.00561143	2.07216e-05
Q9JI90	Rnf14	E3 ubiquitin-protein ligase RNF14	RNF14_MOUSE	inf	0.000685038	0.00564149	2.50056e-05
Q8BNW9	Kbtbd11	Kelch repeat and BTB domain-containing protein 11	KBTBB_MOUSE	inf	0.000691319	0.00566008	9.15171e-06
Q8BM65;Q8BM65-2;Q8BM65-3;Q8BM65-4;Q8BM65-5	Nyap2	Neuronal tyrosine-phosphorylated phosphoinositide-3-kinase adapter 2;Isoform 2 of Neuronal tyrosine-phosphorylated phosphoinositide-3-kinase adapter 2;Isoform 3 of Neuronal tyrosine-phosphorylated phosphoinositide-3-kinase adapter 2;Isoform 4 of Neuronal tyrosine-phosphorylated phosphoinositide-3-kinase adapter 2;Isoform 5 of Neuronal tyrosine-phosphorylated phosphoinositide-3-kinase adapter 2	NYAP2_MOUSE	inf	0.000691981	0.00566008	6.11183e-06
P05214	Tuba3a	Tubulin alpha-3 chain	TBA3_MOUSE	2.59508	0.000693679	0.00566008	0.00114234
Q9ESJ4	Nckipsd	NCK-interacting protein with SH3 domain	SPN90_MOUSE	inf	0.000700614	0.00569918	1.5047e-05
Q8K4X7	Agpat4	1-acyl-sn-glycerol-3-phosphate acyltransferase delta	PLCD_MOUSE	inf	0.00071795	0.0058224	1.97919e-05
P40142	Tkt	Transketolase	TKT_MOUSE	1.87337	0.00072129	0.00583171	0.0001532
Q9R1Q8	Tagln3	Transgelin-3	TAGL3_MOUSE	4.53915	0.000732639	0.0058972	0.000459401
G3X9K3	Arfgef1	Brefeldin A-inhibited guanine nucleotide-exchange protein 1	BIG1_MOUSE	inf	0.000733824	0.0058972	1.36334e-05
P62746	Rhob	Rho-related GTP-binding protein RhoB	RHOB_MOUSE	2.37373	0.000741999	0.0059322	7.05014e-05
Q04690;Q04690-2	Nf1	Neurofibromin;Isoform 1 of Neurofibromin	NF1_MOUSE	inf	0.00074264	0.0059322	9.8845e-06
Q61598	Gdi2	Rab GDP dissociation inhibitor beta	GDIB_MOUSE	2.16713	0.000746968	0.00594891	0.000165669
Q61036;Q61036-2	Pak3	Serine/threonine-protein kinase PAK 3;Isoform 2 of Serine/threonine-protein kinase PAK 3	PAK3_MOUSE	inf	0.000749583	0.00595133	1.52237e-05
P63260	Actg1	Actin, cytoplasmic 2	ACTG_MOUSE	2.13914	0.000752188	0.00595133	0.00178723
Q8C166	Cpne1	Copine-1	CPNE1_MOUSE	inf	0.000753985	0.00595133	1.0684e-05
P10630;P10630-2	Eif4a2	Eukaryotic initiation factor 4A-II;Isoform 2 of Eukaryotic initiation factor 4A-II	IF4A2_MOUSE	inf	0.0007593	0.00597555	4.9856e-05
Q3TFD2;Q3TFD2-2	Lpcat1	Lysophosphatidylcholine acyltransferase 1;Isoform 2 of Lysophosphatidylcholine acyltransferase 1	PCAT1_MOUSE	inf	0.00076367	0.00599222	1.33037e-05
Q69ZS8	Kazn	Kazrin	KAZRN_MOUSE	inf	0.000766825	0.00599927	6.7706e-06
Q80XA6	Reps2	RalBP1-associated Eps domain-containing protein 2	REPS2_MOUSE	inf	0.000775318	0.00604793	1.5994e-05
Q9JJZ4	Ube2j1	Ubiquitin-conjugating enzyme E2 J1	UB2J1_MOUSE	inf	0.000783565	0.00608121	1.23706e-05
Q0VE82	Cpne7	Copine-7	CPNE7_MOUSE	inf	0.000784156	0.00608121	2.64806e-05
P63094;P63094-3;Q6R0H7	Gnas	Guanine nucleotide-binding protein G(s) subunit alpha isoforms short;Isoform Gnas-3 of Guanine nucleotide-binding protein G(s) subunit alpha isoforms short;Guanine nucleotide-binding protein G(s) subunit alpha isoforms XLas	GNAS2_MOUSE;GNAS2_MOUSE;GNAS1_MOUSE	inf	0.000788752	0.00608313	4.21277e-05
P63046	Sult4a1	Sulfotransferase 4A1	ST4A1_MOUSE	inf	0.000788977	0.00608313	1.56559e-05
P68368	Tuba4a	Tubulin alpha-4A chain	TBA4A_MOUSE	3.27405	0.000795407	0.00611498	0.00202521
Q9EP53;Q9EP53-2;Q9EP53-3;Q9EP53-4	Tsc1	Hamartin;Isoform 2 of Hamartin;Isoform 3 of Hamartin;Isoform 4 of Hamartin	TSC1_MOUSE	inf	0.000801654	0.00612165	4.54083e-06
Q6PGN3-3;Q6PGN3-4;Q6PGN3-5	Dclk2	Isoform 3 of Serine/threonine-protein kinase DCLK2;Isoform 4 of Serine/threonine-protein kinase DCLK2;Isoform 5 of Serine/threonine-protein kinase DCLK2	DCLK2_MOUSE	inf	0.000802549	0.00612165	2.96037e-05
E9Q0C6	Kiaa1210	Acrosomal protein KIAA1210	K1210_MOUSE	inf	0.000803179	0.00612165	1.89309e-05
Q8R1B4	Eif3c	Eukaryotic translation initiation factor 3 subunit C	EIF3C_MOUSE	inf	0.000808725	0.00614631	1.22386e-05
Q8CHC4	Synj1	Synaptojanin-1	SYNJ1_MOUSE	2.95249	0.000822837	0.00623575	0.000138575
P60879	Snap25	Synaptosomal-associated protein 25	SNP25_MOUSE	2.20231	0.000830413	0.00627528	7.46471e-05
O55242;O55242-2	Sigmar1	Sigma non-opioid intracellular receptor 1;Isoform 2 of Sigma non-opioid intracellular receptor 1	SGMR1_MOUSE	inf	0.000845492	0.00637113	9.06401e-06
Q8K0S0	Phyhip	Phytanoyl-CoA hydroxylase-interacting protein	PHYIP_MOUSE	inf	0.000851543	0.00638109	1.13451e-05
Q8CCJ4	Amer2	APC membrane recruitment protein 2	AMER2_MOUSE	inf	0.000851612	0.00638109	7.47927e-06
Q8R010	Aimp2	Aminoacyl tRNA synthase complex-interacting multifunctional protein 2	AIMP2_MOUSE	inf	0.00085415	0.00638213	6.55003e-06
Q8BG32	Psmd11	26S proteasome non-ATPase regulatory subunit 11	PSD11_MOUSE	inf	0.000863439	0.00643347	1.34023e-05
Q9ESN9;Q9ESN9-2;Q9ESN9-3;Q9ESN9-4;Q9ESN9-6	Mapk8ip3	C-Jun-amino-terminal kinase-interacting protein 3;Isoform 1a of C-Jun-amino-terminal kinase-interacting protein 3;Isoform 1b of C-Jun-amino-terminal kinase-interacting protein 3;Isoform 1d of C-Jun-amino-terminal kinase-interacting protein 3;Isoform 1e of C-Jun-amino-terminal kinase-interacting protein 3	JIP3_MOUSE	inf	0.000868603	0.00645387	7.99627e-06
Q6RHR9;Q6RHR9-3	Magi1	Membrane-associated guanylate kinase, WW and PDZ domain-containing protein 1;Isoform 3 of Membrane-associated guanylate kinase, WW and PDZ domain-containing protein 1	MAGI1_MOUSE	inf	0.000886866	0.00657121	5.43026e-05
Q8VDZ4	Zdhhc5	Palmitoyltransferase ZDHHC5	ZDHC5_MOUSE	inf	0.000892326	0.0065933	4.79294e-06
Q9QYJ0	Dnaja2	DnaJ homolog subfamily A member 2	DNJA2_MOUSE	5.91386	0.000896624	0.00660671	2.59482e-05
Q6P8X1	Snx6	Sorting nexin-6	SNX6_MOUSE	inf	0.000906906	0.006664	1.315e-05
O08579	Emd	Emerin	EMD_MOUSE	inf	0.000913663	0.00669516	2.38094e-05
Q8C0P5	Coro2a	Coronin-2A	COR2A_MOUSE	inf	0.000916235	0.00669556	1.06732e-05
Q91ZU6;Q91ZU6-2;Q91ZU6-4	Dst	Dystonin;Isoform 1 of Dystonin;Isoform 4 of Dystonin	DYST_MOUSE	inf	0.000920061	0.0067051	1.15413e-05
Q9CWK8	Snx2	Sorting nexin-2	SNX2_MOUSE	inf	0.000924627	0.00671996	1.56949e-05
Q2TBE6	Pi4k2a	Phosphatidylinositol 4-kinase type 2-alpha	P4K2A_MOUSE	inf	0.0009365	0.00678771	1.16031e-05
Q8BFQ8	Gatd1	Glutamine amidotransferase-like class 1 domain-containing protein 1	GALD1_MOUSE	inf	0.000947136	0.00684615	1.18249e-05
Q99ME2	Wdr6	WD repeat-containing protein 6	WDR6_MOUSE	inf	0.000952679	0.00686755	1.18636e-05
P49443	Ppm1a	Protein phosphatase 1A	PPM1A_MOUSE	inf	0.000956901	0.00687934	1.44139e-05
P19324	Serpinh1	Serpin H1	SERPH_MOUSE	inf	0.000987893	0.00706603	1.8807e-05
B1AZP2;B1AZP2-2	Dlgap4	Disks large-associated protein 4;Isoform 2 of Disks large-associated protein 4	DLGP4_MOUSE	inf	0.000988181	0.00706603	6.34067e-06
Q7TQD2	Tppp	Tubulin polymerization-promoting protein	TPPP_MOUSE	1.6466	0.000997069	0.00711047	0.00016733
O35681	Syt3	Synaptotagmin-3	SYT3_MOUSE	inf	0.00100543	0.00715094	7.5937e-06
Q64337;Q64337-2	Sqstm1	Sequestosome-1;Isoform 2 of Sequestosome-1	SQSTM_MOUSE	inf	0.00102554	0.00727447	1.10751e-05
A2ALU4;A2ALU4-2	Shroom2	Protein Shroom2;Isoform 2 of Protein Shroom2	SHRM2_MOUSE	inf	0.00104703	0.00740718	1.05852e-05
P54923	Adprh	[Protein ADP-ribosylarginine] hydrolase	ADPRH_MOUSE	inf	0.00105885	0.0074709	1.26409e-05
Q99JI4	Psmd6	26S proteasome non-ATPase regulatory subunit 6	PSMD6_MOUSE	inf	0.00106179	0.00747187	7.643e-06
Q8R081	Hnrnpl	Heterogeneous nuclear ribonucleoprotein L	HNRPL_MOUSE	inf	0.00106877	0.00750112	1.8991e-05
Q06890	Clu	Clusterin	CLUS_MOUSE	inf	0.00107487	0.0075241	3.3993e-06
P61759	Vbp1	Prefoldin subunit 3	PFD3_MOUSE	inf	0.00110197	0.00769357	8.1356e-06
O35465;O35465-2	Fkbp8	Peptidyl-prolyl cis-trans isomerase FKBP8;Isoform 2 of Peptidyl-prolyl cis-trans isomerase FKBP8	FKBP8_MOUSE	inf	0.00111272	0.00774829	1.21986e-05
Q80X80	C2cd2l	Phospholipid transfer protein C2CD2L	C2C2L_MOUSE	inf	0.00111905	0.00777199	1.15149e-05
Q6P9S0	Mtss2	Protein MTSS 2	MTSS2_MOUSE	inf	0.00115485	0.00799971	2.36928e-05
O70492	Snx3	Sorting nexin-3	SNX3_MOUSE	5.10601	0.001162	0.00802833	1.5812e-05
Q9CQV8;Q9CQV8-2	Ywhab	14-3-3 protein beta/alpha;Isoform Short of 14-3-3 protein beta/alpha	1433B_MOUSE	2.85331	0.00116795	0.00804857	0.000188346
O88951	Lin7b	Protein lin-7 homolog B	LIN7B_MOUSE	inf	0.00117596	0.00805771	4.90144e-06
Q8K2I1	Fntb	Protein farnesyltransferase subunit beta	FNTB_MOUSE	inf	0.00117752	0.00805771	1.65274e-05
Q9EPK7	Xpo7	Exportin-7	XPO7_MOUSE	inf	0.0011831	0.00805771	6.53841e-06
Q61701;Q61701-10;Q61701-11;Q61701-4;Q61701-5;Q61701-7;Q61701-9	Elavl4	ELAV-like protein 4;Isoform 9 of ELAV-like protein 4;Isoform 10 of ELAV-like protein 4;Isoform 3 of ELAV-like protein 4;Isoform 4 of ELAV-like protein 4;Isoform 6 of ELAV-like protein 4;Isoform 8 of ELAV-like protein 4	ELAV4_MOUSE	inf	0.00118626	0.00805771	1.36631e-05
Q80UP3	Dgkz	Diacylglycerol kinase zeta	DGKZ_MOUSE	inf	0.00118836	0.00805771	1.1851e-05
Q6ZPE2;Q6ZPE2-2	Sbf1	Myotubularin-related protein 5;Isoform 2 of Myotubularin-related protein 5	MTMR5_MOUSE	inf	0.00118979	0.00805771	8.03866e-06
P10649	Gstm1	Glutathione S-transferase Mu 1	GSTM1_MOUSE	1.24387	0.00119048	0.00805771	0.000111498
Q810U4;Q810U4-2;Q810U4-3	Nrcam	Neuronal cell adhesion molecule;Isoform 2 of Neuronal cell adhesion molecule;Isoform 3 of Neuronal cell adhesion molecule	NRCAM_MOUSE	inf	0.00119799	0.00808794	8.50046e-06
A2AGT5;A2AGT5-2;A2AGT5-3	Ckap5	Cytoskeleton-associated protein 5;Isoform 2 of Cytoskeleton-associated protein 5;Isoform 3 of Cytoskeleton-associated protein 5	CKAP5_MOUSE	inf	0.00120992	0.00814781	1.10195e-05
O35643	Ap1b1	AP-1 complex subunit beta-1	AP1B1_MOUSE	inf	0.00121469	0.00815929	1.52848e-05
P84086	Cplx2	Complexin-2	CPLX2_MOUSE	2.29059	0.00124481	0.0083337	0.000272662
Q8BL66	Eea1	Early endosome antigen 1	EEA1_MOUSE	inf	0.00124692	0.0083337	2.43533e-05
Q6DFV3	Arhgap21	Rho GTPase-activating protein 21	RHG21_MOUSE	inf	0.00125942	0.00837154	1.36879e-05
P60843	Eif4a1	Eukaryotic initiation factor 4A-I	IF4A1_MOUSE	2.71249	0.00126109	0.00837154	0.000115463
A2APX8;A2APX8-2;A2APX8-3	Scn1a	Sodium channel protein type 1 subunit alpha;Isoform 2 of Sodium channel protein type 1 subunit alpha;Isoform 3 of Sodium channel protein type 1 subunit alpha	SCN1A_MOUSE	inf	0.00126202	0.00837154	7.99955e-06
Q80XI3;Q80XI3-2;Q80XI3-3;Q80XI3-4	Eif4g3	Eukaryotic translation initiation factor 4 gamma 3;Isoform 2 of Eukaryotic translation initiation factor 4 gamma 3;Isoform 3 of Eukaryotic translation initiation factor 4 gamma 3;Isoform 4 of Eukaryotic translation initiation factor 4 gamma 3	IF4G3_MOUSE	inf	0.00128137	0.00845587	1.51091e-05
Q8BVE3	Atp6v1h	V-type proton ATPase subunit H	VATH_MOUSE	2.51488	0.00128448	0.00845587	7.20505e-05
Q91Z69	Srgap1	SLIT-ROBO Rho GTPase-activating protein 1	SRGP1_MOUSE	inf	0.00128513	0.00845587	7.20519e-06
Q91VN4	Chchd6	MICOS complex subunit Mic25	MIC25_MOUSE	inf	0.00128796	0.00845587	8.02937e-06
P18872	Gnao1	Guanine nucleotide-binding protein G(o) subunit alpha	GNAO_MOUSE	2.60193	0.00129325	0.00845587	0.00082529
Q6ZPJ3	Ube2o	(E3-independent) E2 ubiquitin-conjugating enzyme UBE2O	UBE2O_MOUSE	inf	0.00129381	0.00845587	1.54214e-05
P70336;P70336-2	Rock2	Rho-associated protein kinase 2;Isoform 2 of Rho-associated protein kinase 2	ROCK2_MOUSE	inf	0.00130934	0.00853642	9.97227e-06
Q8VEA4	Chchd4	Mitochondrial intermembrane space import and assembly protein 40	MIA40_MOUSE	inf	0.00132036	0.00858718	6.10351e-06
Q3UJU9	Rmdn3	Regulator of microtubule dynamics protein 3	RMD3_MOUSE	inf	0.0013337	0.00862359	1.10063e-05
P14824	Anxa6	Annexin A6	ANXA6_MOUSE	1.98857	0.00133457	0.00862359	6.50655e-05
Q8CGK7	Gnal	Guanine nucleotide-binding protein G(olf) subunit alpha	GNAL_MOUSE	inf	0.00133568	0.00862359	2.069e-05
P68372	Tubb4b	Tubulin beta-4B chain	TBB4B_MOUSE	3.18199	0.00134797	0.00868181	0.00179404
Q80TK0	Kiaa1107	AP2-interacting clathrin-endocytosis protein	K1107_MOUSE	inf	0.00137007	0.00880284	1.11813e-05
Q9Z2D3	Gsdme	Gasdermin-E	GSDME_MOUSE	inf	0.00137689	0.00882539	9.10153e-06
Q9Z351;Q9Z351-13;Q9Z351-2;Q9Z351-4	Kcnq2	Potassium voltage-gated channel subfamily KQT member 2;Isoform 13 of Potassium voltage-gated channel subfamily KQT member 2;Isoform 2 of Potassium voltage-gated channel subfamily KQT member 2;Isoform 4 of Potassium voltage-gated channel subfamily KQT member 2	KCNQ2_MOUSE	inf	0.00138524	0.0088563	1.12103e-05
O88741	Gdap1	Ganglioside-induced differentiation-associated protein 1	GDAP1_MOUSE	inf	0.00138903	0.0088563	2.03497e-05
Q61923	Kcna6	Potassium voltage-gated channel subfamily A member 6	KCNA6_MOUSE	inf	0.0013927	0.0088563	7.79812e-06
Q9CZC8	Scrn1	Secernin-1	SCRN1_MOUSE	2.3682	0.00139829	0.0088563	9.00426e-05
Q8CHH9;Q8CHH9-2	Septin8	Septin-8;Isoform 2 of Septin-8	SEPT8_MOUSE	inf	0.00139836	0.0088563	1.47111e-05
Q9CX34	Sugt1	Protein SGT1 homolog	SGT1_MOUSE	5.94105	0.00142216	0.00898562	4.3533e-05
Q69Z98;Q69Z98-2;Q69Z98-3;Q69Z98-4	Brsk2	Serine/threonine-protein kinase BRSK2;Isoform 2 of Serine/threonine-protein kinase BRSK2;Isoform 3 of Serine/threonine-protein kinase BRSK2;Isoform 4 of Serine/threonine-protein kinase BRSK2	BRSK2_MOUSE	inf	0.00143279	0.00902181	1.01549e-05
Q8JZR6;Q8JZR6-2	Slc4a8	Electroneutral sodium bicarbonate exchanger 1;Isoform 2 of Electroneutral sodium bicarbonate exchanger 1	S4A8_MOUSE	inf	0.00143467	0.00902181	7.76892e-06
P63011	Rab3a	Ras-related protein Rab-3A	RAB3A_MOUSE	2.27459	0.00145911	0.00915386	0.000212553
Q9CQ89	Cuta	Protein CutA	CUTA_MOUSE	inf	0.00146535	0.00916264	2.67829e-05
Q80UW2	Fbxo2	F-box only protein 2	FBX2_MOUSE	inf	0.00147096	0.00916264	3.03193e-05
Q9JK48;Q9JK48-2	Sh3glb1	Endophilin-B1;Isoform 2 of Endophilin-B1	SHLB1_MOUSE	inf	0.00147414	0.00916264	8.27757e-06
Q9WUA6;Q9WUA6-2	Akt3	RAC-gamma serine/threonine-protein kinase;Isoform 2 of RAC-gamma serine/threonine-protein kinase	AKT3_MOUSE	inf	0.00147429	0.00916264	9.61147e-06
Q6ZPJ0	Tex2	Testis-expressed protein 2	TEX2_MOUSE	inf	0.00148134	0.00916536	9.98338e-06
Q9WVQ1;Q9WVQ1-2;Q9WVQ1-4	Magi2	Membrane-associated guanylate kinase, WW and PDZ domain-containing protein 2;Isoform 2 of Membrane-associated guanylate kinase, WW and PDZ domain-containing protein 2;Isoform 4 of Membrane-associated guanylate kinase, WW and PDZ domain-containing protein 2	MAGI2_MOUSE	inf	0.00148541	0.00916536	1.27073e-05
P15116	Cdh2	Cadherin-2	CADH2_MOUSE	inf	0.00148551	0.00916536	3.55335e-05
E9Q8I9;E9Q8I9-2	Fry	Protein furry homolog;Isoform 2 of Protein furry homolog	FRY_MOUSE	inf	0.00149096	0.00916536	1.09379e-05
Q8C729;Q8C729-2	Fam126b	Protein FAM126B;Isoform 2 of Protein FAM126B	F126B_MOUSE	inf	0.00149196	0.00916536	9.66483e-06
A2RT62	Fbxl16	F-box/LRR-repeat protein 16	FXL16_MOUSE	inf	0.00152482	0.00932571	1.19686e-05
P61202;P61202-2	Cops2	COP9 signalosome complex subunit 2;Isoform 2 of COP9 signalosome complex subunit 2	CSN2_MOUSE	inf	0.00152507	0.00932571	1.18989e-05
Q8K2L8	Trappc12	Trafficking protein particle complex subunit 12	TPC12_MOUSE	inf	0.00153752	0.00938026	5.96005e-05
Q9EPN1;Q9EPN1-3;Q9EPN1-4	Nbea	Neurobeachin;Isoform 3 of Neurobeachin;Isoform 4 of Neurobeachin	NBEA_MOUSE	inf	0.00154853	0.00942581	1.06879e-05
Q6PDL0	Dync1li2	Cytoplasmic dynein 1 light intermediate chain 2	DC1L2_MOUSE	inf	0.00156892	0.00952813	1.05404e-05
Q7TSY6;Q7TSY6-2;Q7TSY6-3;Q7TSY6-4;Q7TSY6-5;Q7TSY6-6	Celf4	CUGBP Elav-like family member 4;Isoform 2 of CUGBP Elav-like family member 4;Isoform 3 of CUGBP Elav-like family member 4;Isoform 4 of CUGBP Elav-like family member 4;Isoform 5 of CUGBP Elav-like family member 4;Isoform 6 of CUGBP Elav-like family member 4	CELF4_MOUSE	inf	0.00158022	0.00957493	1.4195e-05
P63073	Eif4e	Eukaryotic translation initiation factor 4E	IF4E_MOUSE	inf	0.00159777	0.00965926	5.40054e-06
Q9R062	Gyg1	Glycogenin-1	GLYG_MOUSE	inf	0.00160493	0.00966177	1.78341e-05
P62259	Ywhae	14-3-3 protein epsilon	1433E_MOUSE	1.70218	0.00160545	0.00966177	0.000154365
Q8R3V5;Q8R3V5-1;Q8R3V5-3	Sh3glb2	Endophilin-B2;Isoform 1 of Endophilin-B2;Isoform 3 of Endophilin-B2	SHLB2_MOUSE	2.53201	0.00161302	0.00968537	4.27129e-05
Q8BTG3	Tcp11l1	T-complex protein 11-like protein 1	T11L1_MOUSE	inf	0.00163299	0.00977428	8.27926e-06
P83741;P83741-2;P83741-3;P83741-4;P83741-5	Wnk1	Serine/threonine-protein kinase WNK1;Isoform 2 of Serine/threonine-protein kinase WNK1;Isoform 3 of Serine/threonine-protein kinase WNK1;Isoform 4 of Serine/threonine-protein kinase WNK1;Isoform 5 of Serine/threonine-protein kinase WNK1	WNK1_MOUSE	inf	0.00163517	0.00977428	1.15455e-05
Q8R0A7	Kiaa0513	Uncharacterized protein KIAA0513	K0513_MOUSE	inf	0.00166906	0.00995297	9.96144e-06
Q3B7Z2	Osbp	Oxysterol-binding protein 1	OSBP1_MOUSE	4.85485	0.00167255	0.00995297	6.36782e-06
P99024	Tubb5	Tubulin beta-5 chain	TBB5_MOUSE	3.74284	0.00168761	0.0100202	0.000641179
P54830;P54830-2	Ptpn5	Tyrosine-protein phosphatase non-receptor type 5;Isoform STEP46 of Tyrosine-protein phosphatase non-receptor type 5	PTN5_MOUSE	inf	0.00170154	0.0100804	1.07903e-05
Q8BJY1	Psmd5	26S proteasome non-ATPase regulatory subunit 5	PSMD5_MOUSE	inf	0.00173023	0.0102276	1.54819e-05
P16546	Sptan1	Spectrin alpha chain, non-erythrocytic 1	SPTN1_MOUSE	2.58373	0.00174924	0.010317	0.000278823
P31938	Map2k1	Dual specificity mitogen-activated protein kinase kinase 1	MP2K1_MOUSE	2.35758	0.00175341	0.0103175	9.49424e-05
Q3UHD6;Q3UHD6-2	Snx27	Sorting nexin-27;Isoform 2 of Sorting nexin-27	SNX27_MOUSE	inf	0.00175708	0.0103175	3.68524e-05
O35945	Aldh1a7	Aldehyde dehydrogenase, cytosolic 1	AL1A7_MOUSE	1.44029	0.00176812	0.0103594	0.000151569
Q01063;Q01063-2	Pde4d	cAMP-specific 3',5'-cyclic phosphodiesterase 4D;Isoform 9 of cAMP-specific 3',5'-cyclic phosphodiesterase 4D	PDE4D_MOUSE	inf	0.00178034	0.0104081	1.33665e-05
B9EJ86	Osbpl8	Oxysterol-binding protein-related protein 8	OSBL8_MOUSE	inf	0.00179314	0.01046	1.08154e-05
P62823	Rab3c	Ras-related protein Rab-3C	RAB3C_MOUSE	1.80977	0.0018466	0.0107483	4.3645e-05
P05063	Aldoc	Fructose-bisphosphate aldolase C	ALDOC_MOUSE	1.93194	0.001855	0.0107565	0.000155745
Q8WTY4	Ciapin1	Anamorsin	CPIN1_MOUSE	5.2678	0.00186626	0.0107565	2.26029e-05
Q9Z2C4	Mtmr1	Myotubularin-related protein 1	MTMR1_MOUSE	inf	0.00186631	0.0107565	7.47882e-06
Q8BFY9;Q8BFY9-2	Tnpo1	Transportin-1;Isoform 2 of Transportin-1	TNPO1_MOUSE	inf	0.00187237	0.0107565	1.19219e-05
Q80ZI6	Lrsam1	E3 ubiquitin-protein ligase LRSAM1	LRSM1_MOUSE	inf	0.00187424	0.0107565	5.07495e-06
O88485	Dync1i1	Cytoplasmic dynein 1 intermediate chain 1	DC1I1_MOUSE	inf	0.00187454	0.0107565	1.33928e-05
Q9Z1K5	Arih1	E3 ubiquitin-protein ligase ARIH1	ARI1_MOUSE	inf	0.00187633	0.0107565	7.35273e-06
Q91XM9;Q91XM9-2;Q91XM9-3;Q91XM9-4;Q91XM9-6;Q91XM9-7	Dlg2	Disks large homolog 2;Isoform 2 of Disks large homolog 2;Isoform 3 of Disks large homolog 2;Isoform 4 of Disks large homolog 2;Isoform 6 of Disks large homolog 2;Isoform 7 of Disks large homolog 2	DLG2_MOUSE	inf	0.00191772	0.0109702	4.56347e-05
Q9CQY2	Ramac	RNA guanine-N7 methyltransferase activating subunit	RAMAC_MOUSE	inf	0.0019332	0.011035	1.23333e-05
Q8BT60	Cpne3	Copine-3	CPNE3_MOUSE	2.48887	0.00193763	0.0110366	0.000164798
Q6PHN9	Rab35	Ras-related protein Rab-35	RAB35_MOUSE	inf	0.00194904	0.0110779	1.92931e-05
P0DP26;P0DP27;P0DP28	Calm1;Calm2;Calm3	Calmodulin-1;Calmodulin-2;Calmodulin-3	CALM1_MOUSE;CALM2_MOUSE;CALM3_MOUSE	2.27798	0.00197465	0.0111995	0.000293519
Q03173;Q03173-4;Q03173-5	Enah	Protein enabled homolog;Isoform 3 of Protein enabled homolog;Isoform 4 of Protein enabled homolog	ENAH_MOUSE	inf	0.00198976	0.0112612	8.45693e-06
P47757-2	Capzb	Isoform 2 of F-actin-capping protein subunit beta	CAPZB_MOUSE	1.85903	0.00201589	0.0113781	6.35882e-05
P61211	Arl1	ADP-ribosylation factor-like protein 1	ARL1_MOUSE	4.72458	0.00201898	0.0113781	1.12845e-05
Q9EQF6	Dpysl5	Dihydropyrimidinase-related protein 5	DPYL5_MOUSE	1.95352	0.00206409	0.0116045	0.000106913
Q80U63;Q80U63-2	Mfn2	Mitofusin-2;Isoform 2 of Mitofusin-2	MFN2_MOUSE	inf	0.00206787	0.0116045	1.01773e-05
P46096	Syt1	Synaptotagmin-1	SYT1_MOUSE	2.31981	0.0021022	0.0117723	0.000199878
P61148	Fgf1	Fibroblast growth factor 1	FGF1_MOUSE	inf	0.00211042	0.0117815	4.29773e-06
P62821	Rab1A	Ras-related protein Rab-1A	RAB1A_MOUSE	2.34115	0.00211269	0.0117815	5.76153e-05
P19157	Gstp1	Glutathione S-transferase P 1	GSTP1_MOUSE	2.72741	0.00216375	0.0120409	7.12574e-05
P08752	Gnai2	Guanine nucleotide-binding protein G(i) subunit alpha-2	GNAI2_MOUSE	1.92366	0.00221609	0.0123065	0.000179494
Q8CBE3	Wdr37	WD repeat-containing protein 37	WDR37_MOUSE	inf	0.00223482	0.0123846	7.14841e-06
A2AQ07	Tubb1	Tubulin beta-1 chain	TBB1_MOUSE	2.28267	0.00224587	0.01242	0.000829308
P63101	Ywhaz	14-3-3 protein zeta/delta	1433Z_MOUSE	2.23539	0.00225326	0.012435	0.000486112
Q9QYB5;Q9QYB5-2	Add3	Gamma-adducin;Isoform 1 of Gamma-adducin	ADDG_MOUSE	4.57584	0.00227405	0.0124942	1.21466e-05
Q9R0A0	Pex14	Peroxisomal membrane protein PEX14	PEX14_MOUSE	inf	0.00228383	0.0124942	7.76795e-06
Q6A4J8;Q6A4J8-2;Q6A4J8-3	Usp7	Ubiquitin carboxyl-terminal hydrolase 7;Isoform 2 of Ubiquitin carboxyl-terminal hydrolase 7;Isoform 3 of Ubiquitin carboxyl-terminal hydrolase 7	UBP7_MOUSE	inf	0.00228867	0.0124942	3.29196e-06
Q9D394	Rufy3	Protein RUFY3	RUFY3_MOUSE	6.52776	0.00228907	0.0124942	0.000111002
Q812A2	Srgap3	SLIT-ROBO Rho GTPase-activating protein 3	SRGP3_MOUSE	inf	0.00229107	0.0124942	4.98235e-06
O88712	Ctbp1	C-terminal-binding protein 1	CTBP1_MOUSE	1.60605	0.00229218	0.0124942	7.60785e-05
P46664	Adss2	Adenylosuccinate synthetase isozyme 2	PURA2_MOUSE	inf	0.00230988	0.012565	5.95354e-06
Q9D832	Dnajb4	DnaJ homolog subfamily B member 4	DNJB4_MOUSE	inf	0.00233308	0.0126653	1.38202e-05
O08532-4;O08532-5	Cacna2d1	Isoform 2D of Voltage-dependent calcium channel subunit alpha-2/delta-1;Isoform 2E of Voltage-dependent calcium channel subunit alpha-2/delta-1	CA2D1_MOUSE	inf	0.00234775	0.012719	7.36579e-06
P58252	Eef2	Elongation factor 2	EF2_MOUSE	1.6413	0.0023546	0.0127302	0.000130529
Q6PAJ1	Bcr	Breakpoint cluster region protein	BCR_MOUSE	inf	0.00236746	0.0127657	1.02153e-05
Q80TV8;Q80TV8-2	Clasp1	CLIP-associating protein 1;Isoform 2 of CLIP-associating protein 1	CLAP1_MOUSE	inf	0.00237077	0.0127657	1.58975e-05
B9EJ80	Pdzd8	PDZ domain-containing protein 8	PDZD8_MOUSE	inf	0.00238561	0.0128196	1.63103e-05
Q9D7A8	Armc1	Armadillo repeat-containing protein 1	ARMC1_MOUSE	inf	0.00239296	0.0128332	7.0649e-06
Q01405	Sec23a	Protein transport protein Sec23A	SC23A_MOUSE	inf	0.00243855	0.0130514	1.11901e-05
Q61361	Bcan	Brevican core protein	PGCB_MOUSE	inf	0.00244767	0.0130739	2.66504e-05
Q91YM2	Arhgap35	Rho GTPase-activating protein 35	RHG35_MOUSE	inf	0.00246596	0.0131452	6.69138e-06
Q8R3Z5;Q8R3Z5-2;Q8R3Z5-3;Q8R3Z5-4	Cacnb1	Voltage-dependent L-type calcium channel subunit beta-1;Isoform 2 of Voltage-dependent L-type calcium channel subunit beta-1;Isoform 3 of Voltage-dependent L-type calcium channel subunit beta-1;Isoform 4 of Voltage-dependent L-type calcium channel subunit beta-1	CACB1_MOUSE	inf	0.00250218	0.0133116	5.15381e-06
Q80UJ7	Rab3gap1	Rab3 GTPase-activating protein catalytic subunit	RB3GP_MOUSE	inf	0.00251	0.0133229	1.24174e-05
P11499	Hsp90ab1	Heat shock protein HSP 90-beta	HS90B_MOUSE	3.31585	0.00251431	0.0133229	0.000886293
P49025;P49025-3;P49025-4;P49025-5	Cit	Citron Rho-interacting kinase;Isoform 3 of Citron Rho-interacting kinase;Isoform 4 of Citron Rho-interacting kinase;Isoform 5 of Citron Rho-interacting kinase	CTRO_MOUSE	inf	0.0025502	0.0134862	2.19295e-05
Q9CZ44;Q9CZ44-3	Nsfl1c	NSFL1 cofactor p47;Isoform 3 of NSFL1 cofactor p47	NSF1C_MOUSE	5.05956	0.00257375	0.0135655	2.1323e-05
Q9QUI0	Rhoa	Transforming protein RhoA	RHOA_MOUSE	2.85748	0.00257709	0.0135655	9.14108e-05
O08586	Pten	Phosphatidylinositol 3,4,5-trisphosphate 3-phosphatase and dual-specificity protein phosphatase PTEN	PTEN_MOUSE	inf	0.0025805	0.0135655	7.25848e-06
Q52KR3	Prune2	Protein prune homolog 2	PRUN2_MOUSE	inf	0.00258951	0.013586	5.18429e-06
Q91VR5	Ddx1	ATP-dependent RNA helicase DDX1	DDX1_MOUSE	inf	0.00262592	0.0137499	1.18688e-05
B2RUJ5;B2RUJ5-3	Apba1	Amyloid-beta A4 precursor protein-binding family A member 1;Isoform 3 of Amyloid-beta A4 precursor protein-binding family A member 1	APBA1_MOUSE	6.28243	0.00265959	0.0138989	7.89524e-05
P12023-2	App	Isoform APP695 of Amyloid-beta A4 protein	A4_MOUSE	inf	0.00269059	0.0140333	1.75216e-05
Q9WTQ5	Akap12	A-kinase anchor protein 12	AKA12_MOUSE	5.66672	0.00271699	0.0141432	4.83667e-05
P97393	Arhgap5	Rho GTPase-activating protein 5	RHG05_MOUSE	inf	0.00275537	0.0142873	4.64575e-06
P61982	Ywhag	14-3-3 protein gamma	1433G_MOUSE	3.50958	0.00275541	0.0142873	0.000623331
Q9DCL8	Ppp1r2	Protein phosphatase inhibitor 2	IPP2_MOUSE	6.00266	0.00279527	0.0144658	5.0412e-05
Q9JHU4	Dync1h1	Cytoplasmic dynein 1 heavy chain 1	DYHC1_MOUSE	2.08342	0.00282519	0.0145922	9.00696e-05
P67871	Csnk2b	Casein kinase II subunit beta	CSK2B_MOUSE	inf	0.00285656	0.0147257	1.22779e-05
P07901	Hsp90aa1	Heat shock protein HSP 90-alpha	HS90A_MOUSE	3.52489	0.00287315	0.0147825	0.000306856
Q3UNH4	Gprin1	G protein-regulated inducer of neurite outgrowth 1	GRIN1_MOUSE	inf	0.00287869	0.0147825	1.86659e-05
Q8K0T0	Rtn1	Reticulon-1	RTN1_MOUSE	2.72145	0.00291005	0.0149141	0.000363378
P63168	Dynll1	Dynein light chain 1, cytoplasmic	DYL1_MOUSE	1.53322	0.00291554	0.0149141	7.31204e-05
Q61792	Lasp1	LIM and SH3 domain protein 1	LASP1_MOUSE	2.18	0.00294209	0.015021	0.000136385
Q7TQF7	Amph	Amphiphysin	AMPH_MOUSE	2.80861	0.00297382	0.015154	6.73865e-05
O08759;O08759-2	Ube3a	Ubiquitin-protein ligase E3A;Isoform 2 of Ubiquitin-protein ligase E3A	UBE3A_MOUSE	4.67703	0.00304055	0.0154644	1.9583e-05
Q3UX10	Tubal3	Tubulin alpha chain-like 3	TBAL3_MOUSE	2.45665	0.00306829	0.0155757	0.000240967
Q8VD33	Sgtb	Small glutamine-rich tetratricopeptide repeat-containing protein beta	SGTB_MOUSE	4.79732	0.00310023	0.0157078	1.468e-05
Q9D358	Acp1	Low molecular weight phosphotyrosine protein phosphatase	PPAC_MOUSE	2.91234	0.00313157	0.0158365	0.000138521
Q8C8R3-4	Ank2	Isoform 4 of Ankyrin-2	ANK2_MOUSE	2.69293	0.00315732	0.0159364	0.000151632
P84084	Arf5	ADP-ribosylation factor 5	ARF5_MOUSE	1.74457	0.00317688	0.0160047	0.000213397
Q04447	Ckb	Creatine kinase B-type	KCRB_MOUSE	2.52946	0.00324144	0.0162796	0.000745413
P35278	Rab5c	Ras-related protein Rab-5C	RAB5C_MOUSE	inf	0.00324716	0.0162796	2.07806e-05
Q8BVI4	Qdpr	Dihydropteridine reductase	DHPR_MOUSE	1.58029	0.00325268	0.0162796	0.000152299
P63005	Pafah1b1	Platelet-activating factor acetylhydrolase IB subunit alpha	LIS1_MOUSE	2.03376	0.00325592	0.0162796	4.76458e-05
P70392	Rasgrf2	Ras-specific guanine nucleotide-releasing factor 2	RGRF2_MOUSE	inf	0.00332535	0.0165956	8.49412e-06
P60764	Rac3	Ras-related C3 botulinum toxin substrate 3	RAC3_MOUSE	1.53206	0.00337854	0.0168294	0.000270914
Q76MZ3	Ppp2r1a	Serine/threonine-protein phosphatase 2A 65 kDa regulatory subunit A alpha isoform	2AAA_MOUSE	2.11958	0.00340494	0.0169208	8.55154e-05
Q5EG47	Prkaa1	5'-AMP-activated protein kinase catalytic subunit alpha-1	AAPK1_MOUSE	inf	0.0034096	0.0169208	5.02e-06
Q99N28	Cadm3	Cell adhesion molecule 3	CADM3_MOUSE	2.74698	0.00346503	0.0171638	8.10467e-05
Q8QZY1	Eif3l	Eukaryotic translation initiation factor 3 subunit L	EIF3L_MOUSE	inf	0.00347997	0.0172058	2.62476e-05
Q8C0T5;Q8C0T5-2	Sipa1l1	Signal-induced proliferation-associated 1-like protein 1;Isoform 2 of Signal-induced proliferation-associated 1-like protein 1	SI1L1_MOUSE	inf	0.00350447	0.0172948	6.08919e-06
P17751	Tpi1	Triosephosphate isomerase	TPIS_MOUSE	1.31779	0.00356537	0.0175627	0.00024758
P16054	Prkce	Protein kinase C epsilon type	KPCE_MOUSE	4.5598	0.00358397	0.017582	1.8709e-05
Q78ZA7	Nap1l4	Nucleosome assembly protein 1-like 4	NP1L4_MOUSE	inf	0.00358677	0.017582	1.02387e-05
Q9QZQ1	Afdn	Afadin	AFAD_MOUSE	inf	0.0035891	0.017582	1.05312e-05
P56399	Usp5	Ubiquitin carboxyl-terminal hydrolase 5	UBP5_MOUSE	2.83646	0.00361001	0.0176519	0.000151552
Q9WVE8	Pacsin2	Protein kinase C and casein kinase substrate in neurons protein 2	PACN2_MOUSE	5.49344	0.00364708	0.0178004	2.79094e-05
Q8BH66	Atl1	Atlastin-1	ATLA1_MOUSE	2.96016	0.00367503	0.017904	7.09942e-05
Q8CFI0;Q8CFI0-2;Q8CFI0-3	Nedd4l	E3 ubiquitin-protein ligase NEDD4-like;Isoform 2 of E3 ubiquitin-protein ligase NEDD4-like;Isoform 3 of E3 ubiquitin-protein ligase NEDD4-like	NED4L_MOUSE	inf	0.00369217	0.0179546	3.81422e-06
Q80XK6	Atg2b	Autophagy-related protein 2 homolog B	ATG2B_MOUSE	inf	0.0037515	0.0182098	7.19545e-06
Q8CI94	Pygb	Glycogen phosphorylase, brain form	PYGB_MOUSE	2.2416	0.00376696	0.0182516	8.29464e-05
P68254;P68254-2	Ywhaq	14-3-3 protein theta;Isoform 2 of 14-3-3 protein theta	1433T_MOUSE	1.88568	0.00388237	0.0187766	0.000187719
Q9Z2H2	Rgs6	Regulator of G-protein signaling 6	RGS6_MOUSE	inf	0.00391997	0.0189102	8.78018e-06
P70188;P70188-2	Kifap3	Kinesin-associated protein 3;Isoform KAP3B of Kinesin-associated protein 3	KIFA3_MOUSE	inf	0.00392421	0.0189102	9.82933e-06
P48774	Gstm5	Glutathione S-transferase Mu 5	GSTM5_MOUSE	1.33179	0.00393794	0.018942	3.70506e-05
Q08509	Eps8	Epidermal growth factor receptor kinase substrate 8	EPS8_MOUSE	inf	0.00394653	0.018949	1.92017e-05
Q8BWT5	Dip2a	Disco-interacting protein 2 homolog A	DIP2A_MOUSE	4.45259	0.00403107	0.0193201	9.93288e-06
P63017	Hspa8	Heat shock cognate 71 kDa protein	HSP7C_MOUSE	2.31842	0.00412858	0.0197223	0.00033146
Q9WUA3	Pfkp	ATP-dependent 6-phosphofructokinase, platelet type	PFKAP_MOUSE	2.74739	0.00412982	0.0197223	0.000116151
P00405	Mtco2	Cytochrome c oxidase subunit 2	COX2_MOUSE	1.56859	0.00418369	0.0199437	0.000219678
Q8VCT3	Rnpep	Aminopeptidase B	AMPB_MOUSE	inf	0.00423752	0.0201642	1.20428e-05
Q8BUV3	Gphn	Gephyrin	GEPH_MOUSE	2.40963	0.00426671	0.0202669	4.47599e-05
Q9D6F9	Tubb4a	Tubulin beta-4A chain	TBB4A_MOUSE	2.3916	0.00431847	0.0204495	0.000236576
P50516	Atp6v1a	V-type proton ATPase catalytic subunit A	VATA_MOUSE	2.14606	0.00432052	0.0204495	0.000163841
Q8R361	Rab11fip5	Rab11 family-interacting protein 5	RFIP5_MOUSE	inf	0.00436274	0.0206126	1.05034e-05
Q91V12-2	Acot7	Isoform A of Cytosolic acyl coenzyme A thioester hydrolase	BACH_MOUSE	1.92236	0.00441992	0.0208457	0.000128409
Q9CZD3	Gars1	Glycine--tRNA ligase	GARS_MOUSE	4.44719	0.00447882	0.0210861	1.82915e-05
Q9Z2Q6	Septin5	Septin-5	SEPT5_MOUSE	1.80109	0.00454905	0.0213789	6.332e-05
Q9Z0P4-2	Palm	Isoform 2 of Paralemmin-1	PALM_MOUSE	inf	0.00470754	0.0220847	1.01082e-05
Q8R0S4;Q8R0S4-1;Q8R0S4-2	Cacnb4	Voltage-dependent L-type calcium channel subunit beta-4;Isoform 1 of Voltage-dependent L-type calcium channel subunit beta-4;Isoform 2 of Voltage-dependent L-type calcium channel subunit beta-4	CACB4_MOUSE	4.59888	0.00480114	0.0224842	1.45032e-05
P62814	Atp6v1b2	V-type proton ATPase subunit B, brain isoform	VATB2_MOUSE	1.78101	0.00483909	0.0225992	9.66013e-05
P70296	Pebp1	Phosphatidylethanolamine-binding protein 1	PEBP1_MOUSE	1.75048	0.00484268	0.0225992	0.000123934
Q9QXL2-2	Kif21a	Isoform 2 of Kinesin-like protein KIF21A	KI21A_MOUSE	4.79443	0.00485663	0.0226246	3.43368e-05
G5E8K5;G5E8K5-2;G5E8K5-3	Ank3	Ankyrin-3;Isoform 2 of Ankyrin-3;Isoform 3 of Ankyrin-3	ANK3_MOUSE	2.02961	0.00488889	0.0227074	6.55312e-05
Q9Z1R2	Bag6	Large proline-rich protein BAG6	BAG6_MOUSE	inf	0.00489148	0.0227074	6.59393e-06
P52480	Pkm	Pyruvate kinase PKM	KPYM_MOUSE	1.22621	0.00492452	0.0228209	0.000735709
Q61024	Asns	Asparagine synthetase [glutamine-hydrolyzing]	ASNS_MOUSE	2.79349	0.00495324	0.0229141	4.02686e-05
Q8K0U4	Hspa12a	Heat shock 70 kDa protein 12A	HS12A_MOUSE	2.47545	0.0050264	0.0232122	0.000138689
Q80U28;Q80U28-15	Madd	MAP kinase-activating death domain protein;Isoform 15 of MAP kinase-activating death domain protein	MADD_MOUSE	4.21733	0.00503721	0.0232218	1.46603e-05
Q8BIZ1	Anks1b	Ankyrin repeat and sterile alpha motif domain-containing protein 1B	ANS1B_MOUSE	4.18028	0.00507615	0.0233608	1.42729e-05
Q91V92	Acly	ATP-citrate synthase	ACLY_MOUSE	2.56417	0.00508565	0.0233641	7.93735e-05
Q6P1F6	Ppp2r2a	Serine/threonine-protein phosphatase 2A 55 kDa regulatory subunit B alpha isoform	2ABA_MOUSE	4.32393	0.00510385	0.0234073	1.68872e-05
Q80W47	Wipi2	WD repeat domain phosphoinositide-interacting protein 2	WIPI2_MOUSE	4.93651	0.00517529	0.0236941	3.38768e-05
Q8C0M9	Asrgl1	Isoaspartyl peptidase/L-asparaginase	ASGL1_MOUSE	1.24422	0.00521422	0.0238313	6.9799e-05
Q01768	Nme2	Nucleoside diphosphate kinase B	NDKB_MOUSE	1.00351	0.00523776	0.0238979	6.97312e-05
P38647	Hspa9	Stress-70 protein, mitochondrial	GRP75_MOUSE	1.57177	0.00525368	0.0239294	0.000172712
P84075	Hpca	Neuron-specific calcium-binding protein hippocalcin	HPCA_MOUSE	1.83744	0.00537905	0.0244276	6.21356e-05
P35700	Prdx1	Peroxiredoxin-1	PRDX1_MOUSE	1.81213	0.00538622	0.0244276	0.000168987
Q61699	Hsph1	Heat shock protein 105 kDa	HS105_MOUSE	1.90086	0.0053931	0.0244276	5.44326e-05
Q60864	Stip1	Stress-induced-phosphoprotein 1	STIP1_MOUSE	2.10834	0.00539978	0.0244276	0.000109291
Q8C8N2	Scai	Protein SCAI	SCAI_MOUSE	-1.8884	0.00551248	0.0248698	0.00100073
P45376	Akr1b1	Aldo-keto reductase family 1 member B1	ALDR_MOUSE	1.86064	0.00551623	0.0248698	4.50341e-05
P59325	Eif5	Eukaryotic translation initiation factor 5	IF5_MOUSE	4.38189	0.00558315	0.0250603	2.03663e-05
Q9JMA1	Usp14	Ubiquitin carboxyl-terminal hydrolase 14	UBP14_MOUSE	4.72009	0.00558428	0.0250603	3.36279e-05
Q6NVF0	Ocrl	Inositol polyphosphate 5-phosphatase OCRL	OCRL_MOUSE	inf	0.00558676	0.0250603	1.13443e-05
Q61081	Cdc37	Hsp90 co-chaperone Cdc37	CDC37_MOUSE	4.94384	0.00571915	0.025611	3.73442e-05
Q9QY76	Vapb	Vesicle-associated membrane protein-associated protein B	VAPB_MOUSE	4.95397	0.00574561	0.0256862	3.791e-05
P63242	Eif5a	Eukaryotic translation initiation factor 5A-1	IF5A1_MOUSE	1.90583	0.00576935	0.0257491	5.32696e-05
Q7TQI3	Otub1	Ubiquitin thioesterase OTUB1	OTUB1_MOUSE	5.69925	0.00578139	0.0257596	0.000128469
P51863	Atp6v0d1	V-type proton ATPase subunit d 1	VA0D1_MOUSE	1.23396	0.00581537	0.0258677	5.56451e-05
Q8VD37-8	Sgip1	Isoform 7 of SH3-containing GRB2-like protein 3-interacting protein 1	SGIP1_MOUSE	5.16803	0.00587757	0.0261007	5.47803e-05
O70443	Gnaz	Guanine nucleotide-binding protein G(z) subunit alpha	GNAZ_MOUSE	4.77179	0.0058877	0.0261021	5.4312e-05
P20357	Map2	Microtubule-associated protein 2	MTAP2_MOUSE	3.829	0.00590756	0.0261287	0.000413649
Q02053	Uba1	Ubiquitin-like modifier-activating enzyme 1	UBA1_MOUSE	2.10516	0.00591334	0.0261287	6.44345e-05
Q8BL65	Ablim2	Actin-binding LIM protein 2	ABLM2_MOUSE	5.19898	0.00594546	0.0262271	6.7209e-05
Q9Z0P4	Palm	Paralemmin-1	PALM_MOUSE	3.15221	0.00597113	0.026285	0.000110213
Q7M6Y3;Q7M6Y3-5;Q7M6Y3-6	Picalm	Phosphatidylinositol-binding clathrin assembly protein;Isoform 5 of Phosphatidylinositol-binding clathrin assembly protein;Isoform 6 of Phosphatidylinositol-binding clathrin assembly protein	PICAL_MOUSE	2.33034	0.00597836	0.026285	0.000144563
Q9Z1B3	Plcb1	1-phosphatidylinositol 4,5-bisphosphate phosphodiesterase beta-1	PLCB1_MOUSE	4.42183	0.00602882	0.0264631	2.74339e-05
Q91Z53	Grhpr	Glyoxylate reductase/hydroxypyruvate reductase	GRHPR_MOUSE	1.06715	0.00605005	0.0265126	4.30333e-05
P84091	Ap2m1	AP-2 complex subunit mu	AP2M1_MOUSE	1.52141	0.00607027	0.0265574	0.000131418
P63040	Cplx1	Complexin-1	CPLX1_MOUSE	5.55878	0.00616023	0.0269067	9.69211e-05
Q9DBJ1	Pgam1	Phosphoglycerate mutase 1	PGAM1_MOUSE	1.45156	0.00625132	0.0272476	7.24221e-05
O70325;O70325-2;O70325-3	Gpx4	Phospholipid hydroperoxide glutathione peroxidase;Isoform Cytoplasmic of Phospholipid hydroperoxide glutathione peroxidase;Isoform Nuclear of Phospholipid hydroperoxide glutathione peroxidase	GPX4_MOUSE	4.37664	0.00625876	0.0272476	2.03761e-05
Q08331	Calb2	Calretinin	CALB2_MOUSE	4.68257	0.00637194	0.0276951	0.000109335
P09411	Pgk1	Phosphoglycerate kinase 1	PGK1_MOUSE	0.875105	0.00639147	0.0277346	0.000109174
P62192	Psmc1	26S proteasome regulatory subunit 4	PRS4_MOUSE	4.81518	0.00644681	0.0279292	2.64718e-05
Q9JKK7	Tmod2	Tropomodulin-2	TMOD2_MOUSE	4.94549	0.00650045	0.0281158	3.80811e-05
Q8BJH1	Zc2hc1a	Zinc finger C2HC domain-containing protein 1A	ZC21A_MOUSE	5.15903	0.00667646	0.0288302	7.06333e-05
Q9D1X0	Nol3	Nucleolar protein 3	NOL3_MOUSE	4.46981	0.00677776	0.0292202	3.27082e-05
Q921M7	Cyrib	CYFIP-related Rac1 interactor B	CYRIB_MOUSE	4.72141	0.00681511	0.0293336	2.83281e-05
Q8BKC5	Ipo5	Importin-5	IPO5_MOUSE	inf	0.00687777	0.0295555	9.03582e-06
Q3UM45	Ppp1r7	Protein phosphatase 1 regulatory subunit 7	PP1R7_MOUSE	4.2523	0.00690552	0.0296269	1.79054e-05
P17183	Eno2	Gamma-enolase	ENOG_MOUSE	1.00603	0.00695089	0.0297735	0.000221367
P60521	Gabarapl2	Gamma-aminobutyric acid receptor-associated protein-like 2	GBRL2_MOUSE	4.66712	0.00698175	0.0297874	2.302e-05
Q91WJ8	Fubp1	Far upstream element-binding protein 1	FUBP1_MOUSE	4.10392	0.00699	0.0297874	1.88494e-05
Q9JHU9	Isyna1	Inositol-3-phosphate synthase 1	INO1_MOUSE	3.94902	0.00699087	0.0297874	1.21396e-05
P63141	Kcna2	Potassium voltage-gated channel subfamily A member 2	KCNA2_MOUSE	1.5507	0.00699891	0.0297874	6.28567e-05
Q9WV69	Dmtn	Dematin	DEMA_MOUSE	1.87395	0.0070363	0.0298987	0.000105053
Q99NE5-7	Rims1	Isoform 7 of Regulating synaptic membrane exocytosis protein 1	RIMS1_MOUSE	-2.3982	0.00704903	0.029905	0.000228666
Q9Z0E0-2	Ncdn	Isoform 2 of Neurochondrin	NCDN_MOUSE	1.57238	0.00707702	0.0299759	0.000213975
P31324	Prkar2b	cAMP-dependent protein kinase type II-beta regulatory subunit	KAP3_MOUSE	3.97461	0.00711716	0.030098	1.38658e-05
Q68FL4	Ahcyl2	Putative adenosylhomocysteinase 3	SAHH3_MOUSE	2.00899	0.00721915	0.0304809	0.000103389
P61089	Ube2n	Ubiquitin-conjugating enzyme E2 N	UBE2N_MOUSE	1.66126	0.00732949	0.0308977	6.95407e-05
Q9QXS6	Dbn1	Drebrin	DREB_MOUSE	2.31006	0.00743019	0.0312726	5.48422e-05
P21278	Gna11	Guanine nucleotide-binding protein subunit alpha-11	GNA11_MOUSE	inf	0.00744793	0.0312978	2.83951e-05
Q9ERV7	Pidd1	p53-induced death domain-containing protein 1	PIDD1_MOUSE	2.04656	0.00746573	0.0313231	0.0001416
Q99KY4;Q99KY4-2	Gak	Cyclin-G-associated kinase;Isoform 2 of Cyclin-G-associated kinase	GAK_MOUSE	-1.49423	0.00755038	0.0316284	0.000633773
Q62348	Tsn	Translin	TSN_MOUSE	4.19894	0.00757364	0.0316626	1.66651e-05
P80318	Cct3	T-complex protein 1 subunit gamma	TCPG_MOUSE	1.36832	0.00758977	0.0316626	3.74101e-05
Q9QYC0	Add1	Alpha-adducin	ADDA_MOUSE	2.34549	0.00759427	0.0316626	5.86082e-05
Q8BLQ9;Q8BLQ9-2;Q8BLQ9-3	Cadm2	Cell adhesion molecule 2;Isoform 2 of Cell adhesion molecule 2;Isoform 3 of Cell adhesion molecule 2	CADM2_MOUSE	4.95338	0.00772901	0.032174	0.000119006
O89026	Robo1	Roundabout homolog 1	ROBO1_MOUSE	inf	0.00776699	0.0322815	6.70446e-06
Q61037;Q61037-2;Q61037-3;Q61037-4;Q61037-5;Q61037-6	Tsc2	Tuberin;Isoform A of Tuberin;Isoform B of Tuberin;Isoform C of Tuberin;Isoform D of Tuberin;Isoform E of Tuberin	TSC2_MOUSE	inf	0.0077878	0.0323175	5.47871e-06
Q8R570	Snap47	Synaptosomal-associated protein 47	SNP47_MOUSE	4.34865	0.00782169	0.0324076	2.89632e-05
Q8BLJ3	Plcxd3	PI-PLC X domain-containing protein 3	PLCX3_MOUSE	inf	0.00784348	0.0324474	3.12532e-05
Q3UHJ0	Aak1	AP2-associated protein kinase 1	AAK1_MOUSE	2.43397	0.00792161	0.0327197	0.000114211
Q8BXR1	Slc7a14	Probable cationic amino acid transporter	S7A14_MOUSE	3.78339	0.00799391	0.0329671	1.16277e-05
P70414	Slc8a1	Sodium/calcium exchanger 1	NAC1_MOUSE	1.42832	0.0080389	0.0331014	4.64933e-05
Q9CWZ7	Napg	Gamma-soluble NSF attachment protein	SNAG_MOUSE	5.01701	0.00810919	0.0333392	7.46498e-05
Q8BTG7;Q8BTG7-3	Ndrg4	Protein NDRG4;Isoform 3 of Protein NDRG4	NDRG4_MOUSE	4.88231	0.00815499	0.0334419	5.03201e-05
Q8VEK0	Tmem30a	Cell cycle control protein 50A	CC50A_MOUSE	inf	0.00815932	0.0334419	1.58083e-05
P50518	Atp6v1e1	V-type proton ATPase subunit E 1	VATE1_MOUSE	4.81301	0.0082076	0.033588	4.29676e-05
P24288	Bcat1	Branched-chain-amino-acid aminotransferase, cytosolic	BCAT1_MOUSE	1.63589	0.00828224	0.0338414	5.4342e-05
Q7TSE6;Q7TSE6-2	Stk38l	Serine/threonine-protein kinase 38-like;Isoform 2 of Serine/threonine-protein kinase 38-like	ST38L_MOUSE	inf	0.00832113	0.0339482	4.6179e-06
Q9DBT5	Ampd2	AMP deaminase 2	AMPD2_MOUSE	4.29068	0.00836197	0.0340625	2.21587e-05
Q69ZH9	Arhgap23	Rho GTPase-activating protein 23	RHG23_MOUSE	-1.30772	0.00840654	0.0341917	9.30316e-05
Q80TZ3	Dnajc6	Putative tyrosine-protein phosphatase auxilin	AUXI_MOUSE	3.01749	0.00842671	0.0342215	7.96546e-05
P16125	Ldhb	L-lactate dehydrogenase B chain	LDHB_MOUSE	1.37956	0.00849369	0.0344409	0.000279656
Q99JY9	Actr3	Actin-related protein 3	ARP3_MOUSE	4.27126	0.0089281	0.0361031	2.33727e-05
Q9WVG6;Q9WVG6-2	Carm1	Histone-arginine methyltransferase CARM1;Isoform 2 of Histone-arginine methyltransferase CARM1	CARM1_MOUSE	inf	0.00893077	0.0361031	3.55279e-05
Q8CGF6	Wdr47	WD repeat-containing protein 47	WDR47_MOUSE	4.20606	0.00896132	0.0361473	2.43484e-05
P61264	Stx1b	Syntaxin-1B	STX1B_MOUSE	1.23343	0.00897796	0.0361473	0.000193658
O35382	Exoc4	Exocyst complex component 4	EXOC4_MOUSE	3.57565	0.00898246	0.0361473	8.56578e-06
O35345	Kpna6	Importin subunit alpha-7	IMA7_MOUSE	inf	0.00910253	0.0365402	8.35739e-06
Q9DB60	Prxl2b	Prostamide/prostaglandin F synthase	PXL2B_MOUSE	4.06464	0.00910756	0.0365402	1.30598e-05
Q9WV92;Q9WV92-2;Q9WV92-3	Epb41l3	Band 4.1-like protein 3;Isoform 2 of Band 4.1-like protein 3;Isoform 3 of Band 4.1-like protein 3	E41L3_MOUSE	1.60377	0.00914752	0.0366452	0.000222712
P16858	Gapdh	Glyceraldehyde-3-phosphate dehydrogenase	G3P_MOUSE	1.34335	0.00917288	0.0366915	0.00128829
P35276	Rab3d	Ras-related protein Rab-3D	RAB3D_MOUSE	1.54321	0.00924477	0.0369236	0.000224905
P61979-3	Hnrnpk	Isoform 3 of Heterogeneous nuclear ribonucleoprotein K	HNRPK_MOUSE	1.82204	0.0093238	0.0371834	9.79648e-05
P08551	Nefl	Neurofilament light polypeptide	NFL_MOUSE	2.3128	0.00938457	0.0373697	0.000171509
P08226	Apoe	Apolipoprotein E	APOE_MOUSE	inf	0.00940201	0.0373832	4.57847e-06
Q9CQI3	Gmfb	Glia maturation factor beta	GMFB_MOUSE	4.27864	0.00949812	0.037709	2.16557e-05
P26638	Sars1	Serine--tRNA ligase, cytoplasmic	SYSC_MOUSE	1.63323	0.00951395	0.0377155	4.14494e-05
O08919	Numbl	Numb-like protein	NUMBL_MOUSE	4.68025	0.0096295	0.0381168	5.36548e-05
Q8BXK8	Agap1	Arf-GAP with GTPase, ANK repeat and PH domain-containing protein 1	AGAP1_MOUSE	4.19986	0.00964523	0.0381223	1.72906e-05
Q8BZ98;Q8BZ98-2	Dnm3	Dynamin-3;Isoform 2 of Dynamin-3	DYN3_MOUSE	1.68644	0.00995604	0.0392924	4.25285e-05
P63321	Rala	Ras-related protein Ral-A	RALA_MOUSE	4.06179	0.0100099	0.0394465	3.11595e-05
Q8BG39	Sv2b	Synaptic vesicle glycoprotein 2B	SV2B_MOUSE	1.63328	0.0102054	0.0401178	7.17496e-05
P60335	Pcbp1	Poly(rC)-binding protein 1	PCBP1_MOUSE	4.58979	0.0102104	0.0401178	7.28628e-05
Q9R1V6-11;Q9R1V6-14	Adam22	Isoform 9 of Disintegrin and metalloproteinase domain-containing protein 22;Isoform 12 of Disintegrin and metalloproteinase domain-containing protein 22	ADA22_MOUSE	4.1648	0.0103187	0.0403678	2.62384e-05
P48722	Hspa4l	Heat shock 70 kDa protein 4L	HS74L_MOUSE	1.97092	0.0103192	0.0403678	5.22276e-05
O08539	Bin1	Myc box-dependent-interacting protein 1	BIN1_MOUSE	1.48781	0.0103196	0.0403678	8.65142e-05
P50396	Gdi1	Rab GDP dissociation inhibitor alpha	GDIA_MOUSE	1.92113	0.0104155	0.0406833	0.00015746
Q61290	Cacna1e	Voltage-dependent R-type calcium channel subunit alpha-1E	CAC1E_MOUSE	inf	0.0104458	0.0407416	1.42255e-05
O55042;O55042-2	Snca	Alpha-synuclein;Isoform 2 of Alpha-synuclein	SYUA_MOUSE	2.54988	0.0105539	0.0411031	0.0010102
Q9JM52;Q9JM52-2;Q9JM52-3	Mink1	Misshapen-like kinase 1;Isoform 1 of Misshapen-like kinase 1;Isoform 3 of Misshapen-like kinase 1	MINK1_MOUSE	1.87341	0.0105937	0.0411978	0.000198555
Q8CI51	Pdlim5	PDZ and LIM domain protein 5	PDLI5_MOUSE	3.62817	0.0107653	0.0418038	1.15016e-05
P62962	Pfn1	Profilin-1	PROF1_MOUSE	2.53591	0.0108331	0.0420058	0.000110173
Q8BFY6	Pef1	Peflin	PEF1_MOUSE	4.84045	0.0110004	0.0425924	7.65512e-05
P35279	Rab6a	Ras-related protein Rab-6A	RAB6A_MOUSE	5.22561	0.0110795	0.0428365	0.000166068
P23506;P23506-2	Pcmt1	Protein-L-isoaspartate(D-aspartate) O-methyltransferase;Isoform 2 of Protein-L-isoaspartate(D-aspartate) O-methyltransferase	PIMT_MOUSE	4.13222	0.0111117	0.0428984	2.57855e-05
O88384	Vti1b	Vesicle transport through interaction with t-SNAREs homolog 1B	VTI1B_MOUSE	3.88234	0.0113972	0.043937	1.41191e-05
Q9CRD0;Q9CRD0-2;Q9CRD0-3	Ociad1	OCIA domain-containing protein 1;Isoform 2 of OCIA domain-containing protein 1;Isoform 3 of OCIA domain-containing protein 1	OCAD1_MOUSE	3.96768	0.0114817	0.0441986	1.6646e-05
Q02819	Nucb1	Nucleobindin-1	NUCB1_MOUSE	3.61729	0.0117265	0.0450757	1.03135e-05
Q91ZZ3	Sncb	Beta-synuclein	SYUB_MOUSE	2.42222	0.011752	0.0451087	0.00106137
Q8C460;Q8C460-2	Eri3	ERI1 exoribonuclease 3;Isoform 2 of ERI1 exoribonuclease 3	ERI3_MOUSE	3.59969	0.0120694	0.0462604	1.00841e-05
P17182	Eno1	Alpha-enolase	ENOA_MOUSE	1.08252	0.0121898	0.0466545	0.000113063
P07214	Sparc	SPARC	SPRC_MOUSE	1.5406	0.0124418	0.0475505	2.53477e-05
Q80ZJ1	Rap2a	Ras-related protein Rap-2a	RAP2A_MOUSE	3.98314	0.012522	0.0477884	2.34726e-05
Q8R5H1;Q8R5H1-5	Usp15	Ubiquitin carboxyl-terminal hydrolase 15;Isoform 5 of Ubiquitin carboxyl-terminal hydrolase 15	UBP15_MOUSE	3.8989	0.0125511	0.0478139	2.71545e-05
Q02357-6	Ank1	Isoform 6 of Ankyrin-1	ANK1_MOUSE	-1.77323	0.0125646	0.0478139	0.000935628
Q6ZWX6	Eif2s1	Eukaryotic translation initiation factor 2 subunit 1	IF2A_MOUSE	4.00617	0.0126594	0.0481058	3.33689e-05
P97494	Gclc	Glutamate--cysteine ligase catalytic subunit	GSH1_MOUSE	3.41344	0.0127035	0.0482046	9.195e-06
Q6P5F9	Xpo1	Exportin-1	XPO1_MOUSE	1.46755	0.0127345	0.0482533	2.34578e-05
P30999;P30999-2;P30999-3	Ctnnd1	Catenin delta-1;Isoform 2 of Catenin delta-1;Isoform 3 of Catenin delta-1	CTND1_MOUSE	-1.66465	0.0128355	0.0485666	0.00623192
P24472	Gsta4	Glutathione S-transferase A4	GSTA4_MOUSE	3.78671	0.012888	0.0486593	1.53559e-05
O08599	Stxbp1	Syntaxin-binding protein 1	STXB1_MOUSE	1.64284	0.0128965	0.0486593	0.000272568
G5E829	Atp2b1	Plasma membrane calcium-transporting ATPase 1	AT2B1_MOUSE	1.0305	0.0129563	0.0487694	8.32394e-05
Q7TPR4	Actn1	Alpha-actinin-1	ACTN1_MOUSE	2.00165	0.0129624	0.0487694	8.17317e-05
P21279	Gnaq	Guanine nucleotide-binding protein G(q) subunit alpha	GNAQ_MOUSE	4.17625	0.0131311	0.0493343	0.000102326
Q61411	Hras	GTPase HRas	RASH_MOUSE	4.14723	0.0133896	0.0502345	3.56122e-05
Q8VEM8	Slc25a3	Phosphate carrier protein, mitochondrial	MPCP_MOUSE	0.947796	0.0134159	0.0502625	0.000396113
Q9JIS5	Sv2a	Synaptic vesicle glycoprotein 2A	SV2A_MOUSE	2.38519	0.0135949	0.0508142	8.34287e-05
Q8BRT1	Clasp2	CLIP-associating protein 2	CLAP2_MOUSE	3.6616	0.0136014	0.0508142	1.92982e-05
P47941	Crkl	Crk-like protein	CRKL_MOUSE	3.97751	0.0137788	0.0514046	2.97571e-05
Q811D0;Q811D0-2;Q811D0-3	Dlg1	Disks large homolog 1;Isoform 2 of Disks large homolog 1;Isoform 3 of Disks large homolog 1	DLG1_MOUSE	3.78325	0.0138141	0.0514642	4.51729e-05
Q61656	Ddx5	Probable ATP-dependent RNA helicase DDX5	DDX5_MOUSE	3.52549	0.0140689	0.0523402	1.42909e-05
Q61301;Q61301-2	Ctnna2	Catenin alpha-2;Isoform 2 of Catenin alpha-2	CTNA2_MOUSE	3.82605	0.0144365	0.053569	3.51744e-05
Q8BR63	Fam177a1	Protein FAM177A1	F177A_MOUSE	3.95046	0.014455	0.053569	2.53536e-05
Q6IRU5	Cltb	Clathrin light chain B	CLCB_MOUSE	4.57471	0.0144596	0.053569	8.88202e-05
O88935-1	Syn1	Isoform Ib of Synapsin-1	SYN1_MOUSE	1.51816	0.0144825	0.053579	0.000177165
Q9CWE0	Mtfr1l	Mitochondrial fission regulator 1-like	MFR1L_MOUSE	3.11488	0.0145198	0.0536428	6.0068e-06
Q8K097;Q8K097-2	Faim2	Protein lifeguard 2;Isoform 2 of Protein lifeguard 2	LFG2_MOUSE	3.47365	0.0148835	0.0549101	1.00324e-05
P32037	Slc2a3	Solute carrier family 2, facilitated glucose transporter member 3	GTR3_MOUSE	1.17252	0.0150996	0.0555779	7.28967e-05
Q9DBG3;Q9DBG3-2	Ap2b1	AP-2 complex subunit beta;Isoform 2 of AP-2 complex subunit beta	AP2B1_MOUSE	1.78115	0.0151086	0.0555779	6.74372e-05
Q58A65;Q58A65-2	Spag9	C-Jun-amino-terminal kinase-interacting protein 4;Isoform 2 of C-Jun-amino-terminal kinase-interacting protein 4	JIP4_MOUSE	3.65407	0.0151272	0.0555779	2.24212e-05
O55091	Impact	Protein IMPACT	IMPCT_MOUSE	3.84447	0.0152948	0.0561161	3.79663e-05
Q9JIW9	Ralb	Ras-related protein Ral-B	RALB_MOUSE	3.94809	0.0153906	0.0563897	3.67256e-05
Q99LX0	Park7	Parkinson disease protein 7 homolog	PARK7_MOUSE	0.6413	0.0154283	0.0564147	8.52648e-05
P39053;P39053-4;P39053-5	Dnm1	Dynamin-1;Isoform 4 of Dynamin-1;Isoform 5 of Dynamin-1	DYN1_MOUSE	1.82219	0.0154398	0.0564147	0.000249072
O08547	Sec22b	Vesicle-trafficking protein SEC22b	SC22B_MOUSE	3.66687	0.0155963	0.0569083	2.00446e-05
P53994	Rab2a	Ras-related protein Rab-2A	RAB2A_MOUSE	1.65619	0.0156915	0.0571773	4.38876e-05
O88342	Wdr1	WD repeat-containing protein 1	WDR1_MOUSE	1.65123	0.0158865	0.0578087	5.08315e-05
P26645	Marcks	Myristoylated alanine-rich C-kinase substrate	MARCS_MOUSE	1.95236	0.0160293	0.0582486	8.50165e-05
Q9CS84;Q9CS84-2;Q9CS84-3;Q9CS84-4	Nrxn1	Neurexin-1;Isoform 2a of Neurexin-1;Isoform 3a of Neurexin-1;Isoform 4a of Neurexin-1	NRX1A_MOUSE	1.39393	0.0161183	0.0584921	1.67947e-05
P62631	Eef1a2	Elongation factor 1-alpha 2	EF1A2_MOUSE	1.42321	0.0161679	0.0585921	0.000105276
Q9WUB3	Pygm	Glycogen phosphorylase, muscle form	PYGM_MOUSE	1.23783	0.0162996	0.0589892	0.000206307
Q9ET01	Pygl	Glycogen phosphorylase, liver form	PYGL_MOUSE	3.8426	0.0163956	0.0592558	2.79756e-05
O35874	Slc1a4	Neutral amino acid transporter A	SATT_MOUSE	3.3187	0.0164266	0.0592875	9.98354e-06
P68033	Actc1	Actin, alpha cardiac muscle 1	ACTC_MOUSE	1.64762	0.0164497	0.0592903	0.000434807
Q9R1R2	Trim3	Tripartite motif-containing protein 3	TRIM3_MOUSE	3.57259	0.0166754	0.059958	2.09934e-05
Q8BG73	Sh3bgrl2	SH3 domain-binding glutamic acid-rich-like protein 2	SH3L2_MOUSE	3.76689	0.0166801	0.059958	2.66205e-05
Q62048	Pea15	Astrocytic phosphoprotein PEA-15	PEA15_MOUSE	3.71123	0.0167329	0.0600668	3.16821e-05
P62812	Gabra1	Gamma-aminobutyric acid receptor subunit alpha-1	GBRA1_MOUSE	inf	0.0167935	0.060203	2.1612e-05
Q64514-2	Tpp2	Isoform Short of Tripeptidyl-peptidase 2	TPP2_MOUSE	4.03304	0.0169154	0.0605218	2.86977e-05
Q791V5	Mtch2	Mitochondrial carrier homolog 2	MTCH2_MOUSE	1.12816	0.0169279	0.0605218	0.00011172
P70175	Dlg3	Disks large homolog 3	DLG3_MOUSE	3.5433	0.017162	0.0612763	2.47913e-05
Q07076	Anxa7	Annexin A7	ANXA7_MOUSE	4.63905	0.0173417	0.0618348	0.000216768
Q62108;Q62108-2;Q62108-3	Dlg4	Disks large homolog 4;Isoform 2 of Disks large homolog 4;Isoform 3 of Disks large homolog 4	DLG4_MOUSE	4.054	0.0173816	0.0618942	5.77676e-05
Q9CRB9	Chchd3	MICOS complex subunit Mic19	MIC19_MOUSE	3.35387	0.0177378	0.0630784	1.80758e-05
P63216	Gng3	Guanine nucleotide-binding protein G(I)/G(S)/G(O) subunit gamma-3	GBG3_MOUSE	3.70741	0.0177882	0.0631732	3.49776e-05
Q9QYB8	Add2	Beta-adducin	ADDB_MOUSE	4.32626	0.0178872	0.0634398	8.72178e-05
Q9R0P5	Dstn	Destrin	DEST_MOUSE	3.79877	0.0179351	0.0635251	3.63804e-05
P26883	Fkbp1a	Peptidyl-prolyl cis-trans isomerase FKBP1A	FKB1A_MOUSE	3.66463	0.0182504	0.064556	2.45792e-05
Q62418;Q62418-2;Q62418-3	Dbnl	Drebrin-like protein;Isoform 2 of Drebrin-like protein;Isoform 3 of Drebrin-like protein	DBNL_MOUSE	3.73345	0.0183052	0.0646639	3.34453e-05
Q61166	Mapre1	Microtubule-associated protein RP/EB family member 1	MARE1_MOUSE	3.9428	0.0184475	0.0650801	5.28086e-05
O55100;O55100-2	Syngr1	Synaptogyrin-1;Isoform 1B of Synaptogyrin-1	SNG1_MOUSE	4.06225	0.0184864	0.065131	5.47739e-05
Q60932-2	Vdac1	Isoform Mt-VDAC1 of Voltage-dependent anion-selective channel protein 1	VDAC1_MOUSE	0.92318	0.0186075	0.065471	0.000217262
Q9WUM3	Coro1b	Coronin-1B	COR1B_MOUSE	3.25426	0.0187339	0.0658285	1.32969e-05
Q9D1A2	Cndp2	Cytosolic non-specific dipeptidase	CNDP2_MOUSE	3.45952	0.0189449	0.066482	1.79535e-05
P50586	Tub	Tubby protein	TUB_MOUSE	3.51793	0.0190295	0.0666912	2.34312e-05
P10126	Eef1a1	Elongation factor 1-alpha 1	EF1A1_MOUSE	0.98104	0.0192305	0.0673067	0.000694151
Q9JII6	Akr1a1	Aldo-keto reductase family 1 member A1	AK1A1_MOUSE	1.38963	0.0195082	0.0681847	1.77595e-05
B1AWN6	Scn2a	Sodium channel protein type 2 subunit alpha	SCN2A_MOUSE	3.50552	0.0195326	0.0681847	5.17188e-05
P36916	Gnl1	Guanine nucleotide-binding protein-like 1	GNL1_MOUSE	3.24408	0.0195586	0.0681861	3.34047e-05
P18760	Cfl1	Cofilin-1	COF1_MOUSE	1.26798	0.0197576	0.0687894	0.000180744
P53810	Pitpna	Phosphatidylinositol transfer protein alpha isoform	PIPNA_MOUSE	3.30653	0.0199191	0.0692611	1.67561e-05
Q9Z0R4	Itsn1	Intersectin-1	ITSN1_MOUSE	3.19704	0.0204977	0.0711801	1.68784e-05
Q8VIJ6	Sfpq	Splicing factor, proline- and glutamine-rich	SFPQ_MOUSE	1.18483	0.020622	0.0715184	3.89534e-05
Q5SSM3;Q5SSM3-2;Q5SSM3-3	Arhgap44	Rho GTPase-activating protein 44;Isoform 2 of Rho GTPase-activating protein 44;Isoform 3 of Rho GTPase-activating protein 44	RHG44_MOUSE	3.50291	0.0206969	0.0716845	3.34565e-05
Q80TJ1-4	Cadps	Isoform 4 of Calcium-dependent secretion activator 1	CAPS1_MOUSE	1.88442	0.0209954	0.0725616	4.32534e-05
Q9D8B3	Chmp4b	Charged multivesicular body protein 4b	CHM4B_MOUSE	3.27077	0.0210047	0.0725616	2.00713e-05
P80313	Cct7	T-complex protein 1 subunit eta	TCPH_MOUSE	1.5139	0.0212152	0.0731937	6.30903e-05
Q9D892	Itpa	Inosine triphosphate pyrophosphatase	ITPA_MOUSE	3.34269	0.0215362	0.0741113	1.9111e-05
P24527	Lta4h	Leukotriene A-4 hydrolase	LKHA4_MOUSE	3.16483	0.0215368	0.0741113	1.59356e-05
Q921C1	Gjc3	Gap junction gamma-3 protein	CXG3_MOUSE	3.75466	0.0216012	0.0741577	4.09593e-05
P52480-2	Pkm	Isoform M1 of Pyruvate kinase PKM	KPYM_MOUSE	1.05844	0.0216061	0.0741577	0.000366232
Q8CAA7	Pgm2l1	Glucose 1,6-bisphosphate synthase	PGM2L_MOUSE	3.69399	0.0216715	0.0742864	8.02432e-05
Q3U1J4	Ddb1	DNA damage-binding protein 1	DDB1_MOUSE	3.21647	0.0219492	0.0751415	1.95108e-05
Q4KUS2	Unc13a	Protein unc-13 homolog A	UN13A_MOUSE	3.1226	0.0220212	0.0752912	1.51012e-05
O08585	Clta	Clathrin light chain A	CLCA_MOUSE	4.47964	0.0221311	0.0754924	0.000310587
P51150	Rab7a	Ras-related protein Rab-7a	RAB7A_MOUSE	4.15633	0.0221369	0.0754924	0.00021776
Q6P069;Q6P069-2	Sri	Sorcin;Isoform 2 of Sorcin	SORCN_MOUSE	3.87361	0.0222014	0.0756156	8.97095e-05
Q9CZ30	Ola1	Obg-like ATPase 1	OLA1_MOUSE	3.4665	0.0223312	0.0759604	2.88726e-05
P62880	Gnb2	Guanine nucleotide-binding protein G(I)/G(S)/G(T) subunit beta-2	GBB2_MOUSE	1.48801	0.022386	0.0760496	0.000246963
Q9JIF0;Q9JIF0-2;Q9JIF0-3	Prmt1	Protein arginine N-methyltransferase 1;Isoform 2 of Protein arginine N-methyltransferase 1;Isoform 3 of Protein arginine N-methyltransferase 1	ANM1_MOUSE	3.27148	0.0224301	0.0761021	2.29023e-05
P70195	Psmb7	Proteasome subunit beta type-7	PSB7_MOUSE	0.950091	0.0225472	0.076402	5.96737e-05
P35802	Gpm6a	Neuronal membrane glycoprotein M6-a	GPM6A_MOUSE	1.77145	0.0226721	0.0767013	0.000228595
Q61990;Q61990-2	Pcbp2	Poly(rC)-binding protein 2;Isoform 2 of Poly(rC)-binding protein 2	PCBP2_MOUSE	3.62886	0.0227084	0.0767013	7.20511e-05
Q6NZJ6	Eif4g1	Eukaryotic translation initiation factor 4 gamma 1	IF4G1_MOUSE	3.35246	0.022722	0.0767013	2.72265e-05
P57746	Atp6v1d	V-type proton ATPase subunit D	VATD_MOUSE	3.16688	0.0227832	0.0768103	1.51904e-05
Q8R366	Igsf8	Immunoglobulin superfamily member 8	IGSF8_MOUSE	1.61251	0.023061	0.0776486	6.91798e-05
P61294	Rab6b	Ras-related protein Rab-6B	RAB6B_MOUSE	3.73619	0.0231501	0.0778498	4.98535e-05
P48758	Cbr1	Carbonyl reductase [NADPH] 1	CBR1_MOUSE	1.10984	0.0233494	0.078421	3.89358e-05
Q60676	Ppp5c	Serine/threonine-protein phosphatase 5	PPP5_MOUSE	3.11639	0.0237835	0.0797783	1.81253e-05
Q8CGY8-2	Ogt	Isoform 2 of UDP-N-acetylglucosamine--peptide N-acetylglucosaminyltransferase 110 kDa subunit	OGT1_MOUSE	2.99793	0.0242398	0.0812064	1.49645e-05
Q91X97	Ncald	Neurocalcin-delta	NCALD_MOUSE	3.10131	0.0244039	0.0815338	1.66185e-05
Q9WV80	Snx1	Sorting nexin-1	SNX1_MOUSE	3.02355	0.0244113	0.0815338	1.40604e-05
Q9D1G1	Rab1b	Ras-related protein Rab-1B	RAB1B_MOUSE	3.02301	0.0244295	0.0815338	1.64923e-05
Q99LD4	Gps1	COP9 signalosome complex subunit 1	CSN1_MOUSE	3.18143	0.0245221	0.0817405	2.00835e-05
Q9R1P3	Psmb2	Proteasome subunit beta type-2	PSB2_MOUSE	1.00934	0.0247528	0.0822977	3.80866e-05
P12382	Pfkl	ATP-dependent 6-phosphofructokinase, liver type	PFKAL_MOUSE	3.01358	0.0247684	0.0822977	1.42476e-05
Q61205	Pafah1b3	Platelet-activating factor acetylhydrolase IB subunit gamma	PA1B3_MOUSE	3.02613	0.0247821	0.0822977	1.46532e-05
P08414	Camk4	Calcium/calmodulin-dependent protein kinase type IV	KCC4_MOUSE	1.13246	0.0249154	0.082637	2.68846e-05
Q60930	Vdac2	Voltage-dependent anion-selective channel protein 2	VDAC2_MOUSE	1.39446	0.0250156	0.0828663	0.000464122
Q9WTT4	Atp6v1g2	V-type proton ATPase subunit G 2	VATG2_MOUSE	3.10609	0.0251412	0.0830763	1.99422e-05
O70161	Pip5k1c	Phosphatidylinositol 4-phosphate 5-kinase type-1 gamma	PI51C_MOUSE	3.53926	0.0251415	0.0830763	4.92064e-05
P47791;P47791-2	Gsr	Glutathione reductase, mitochondrial;Isoform Cytoplasmic of Glutathione reductase, mitochondrial	GSHR_MOUSE	3.10818	0.0252858	0.0834495	2.32112e-05
P46660	Ina	Alpha-internexin	AINX_MOUSE	1.39431	0.0255635	0.0842612	0.000504775
P60904	Dnajc5	DnaJ homolog subfamily C member 5	DNJC5_MOUSE	3.41662	0.0256572	0.0844657	3.30803e-05
Q62393;Q62393-2;Q62393-3	Tpd52	Tumor protein D52;Isoform 2 of Tumor protein D52;Isoform 3 of Tumor protein D52	TPD52_MOUSE	3.12553	0.0257617	0.0847047	2.33161e-05
Q9R1P4	Psma1	Proteasome subunit alpha type-1	PSA1_MOUSE	1.1117	0.0258993	0.0850521	7.44006e-05
Q61481;Q61481-2	Pde1a	Calcium/calmodulin-dependent 3',5'-cyclic nucleotide phosphodiesterase 1A;Isoform 4 of Calcium/calmodulin-dependent 3',5'-cyclic nucleotide phosphodiesterase 1A	PDE1A_MOUSE	2.94369	0.0259368	0.0850702	1.57117e-05
Q8VEH3	Arl8a	ADP-ribosylation factor-like protein 8A	ARL8A_MOUSE	2.14629	0.0259735	0.0850856	5.06691e-05
Q61545	Ewsr1	RNA-binding protein EWS	EWS_MOUSE	3.11451	0.0260413	0.0852028	2.39111e-05
Q8CE50	Snx30	Sorting nexin-30	SNX30_MOUSE	3.9669	0.026402	0.0862767	0.00033964
Q8JZS0	Lin7a	Protein lin-7 homolog A	LIN7A_MOUSE	1.04404	0.0265236	0.086509	4.59652e-05
Q69ZW3;Q69ZW3-2	Ehbp1	EH domain-binding protein 1;Isoform 2 of EH domain-binding protein 1	EHBP1_MOUSE	-1.26228	0.0265381	0.086509	0.000427569
Q8BG51;Q8BG51-2;Q8BG51-3;Q8BG51-4	Rhot1	Mitochondrial Rho GTPase 1;Isoform 2 of Mitochondrial Rho GTPase 1;Isoform 3 of Mitochondrial Rho GTPase 1;Isoform 4 of Mitochondrial Rho GTPase 1	MIRO1_MOUSE	2.98942	0.0267228	0.0870046	1.86046e-05
Q60631	Grb2	Growth factor receptor-bound protein 2	GRB2_MOUSE	2.98402	0.0268069	0.0871717	1.8206e-05
O70252	Hmox2	Heme oxygenase 2	HMOX2_MOUSE	2.94811	0.0269403	0.0874983	1.49378e-05
O08529	Capn2	Calpain-2 catalytic subunit	CAN2_MOUSE	1.49689	0.0269807	0.0875227	3.17577e-05
Q8C1B7;Q8C1B7-2;Q8C1B7-3	Septin11	Septin-11;Isoform 2 of Septin-11;Isoform 3 of Septin-11	SEP11_MOUSE	1.13298	0.0270437	0.0876202	2.94567e-05
P62878	Rbx1	E3 ubiquitin-protein ligase RBX1	RBX1_MOUSE	2.99534	0.0271507	0.0878526	1.42861e-05
Q6P9K8	Caskin1	Caskin-1	CSKI1_MOUSE	3.02139	0.0271815	0.0878526	2.60196e-05
P62881-2	Gnb5	Isoform 2 of Guanine nucleotide-binding protein subunit beta-5	GNB5_MOUSE	2.83951	0.027305	0.0881448	1.28098e-05
Q91WQ3	Yars1	Tyrosine--tRNA ligase, cytoplasmic	SYYC_MOUSE	2.80957	0.0274219	0.0884148	1.13985e-05
Q63844	Mapk3	Mitogen-activated protein kinase 3	MK03_MOUSE	3.08825	0.0276326	0.0889062	4.00954e-05
P46460	Nsf	Vesicle-fusing ATPase	NSF_MOUSE	1.40918	0.0276411	0.0889062	0.000293585
Q8C7M3;Q8C7M3-2;Q8C7M3-3;Q8C7M3-4;Q8C7M3-5;Q8C7M3-6	Trim9	E3 ubiquitin-protein ligase TRIM9;Isoform 2 of E3 ubiquitin-protein ligase TRIM9;Isoform 3 of E3 ubiquitin-protein ligase TRIM9;Isoform 4 of E3 ubiquitin-protein ligase TRIM9;Isoform 5 of E3 ubiquitin-protein ligase TRIM9;Isoform 6 of E3 ubiquitin-protein ligase TRIM9	TRIM9_MOUSE	2.89736	0.0277162	0.0889945	1.39205e-05
P0DN34	Ndufb1	NADH dehydrogenase [ubiquinone] 1 beta subcomplex subunit 1	NDUB1_MOUSE	2.91834	0.0277355	0.0889945	1.79199e-05
Q9EQH3	Vps35	Vacuolar protein sorting-associated protein 35	VPS35_MOUSE	1.62254	0.0280242	0.0898126	6.14604e-05
P63028	Tpt1	Translationally-controlled tumor protein	TCTP_MOUSE	3.20813	0.0281243	0.0900248	4.06387e-05
P14152	Mdh1	Malate dehydrogenase, cytoplasmic	MDHC_MOUSE	0.846031	0.0282782	0.0904087	0.000176283
Q8VED9	Lgalsl	Galectin-related protein	LEGL_MOUSE	3.06685	0.0284979	0.0908257	2.91529e-05
Q8C0E2	Vps26b	Vacuolar protein sorting-associated protein 26B	VP26B_MOUSE	3.10511	0.0285067	0.0908257	4.19721e-05
Q8BG05	Hnrnpa3	Heterogeneous nuclear ribonucleoprotein A3	ROA3_MOUSE	1.70342	0.0285111	0.0908257	4.44742e-05
Q9JLM8	Dclk1	Serine/threonine-protein kinase DCLK1	DCLK1_MOUSE	3.26029	0.0286489	0.0911555	2.98681e-05
Q9CQW2	Arl8b	ADP-ribosylation factor-like protein 8B	ARL8B_MOUSE	3.16417	0.0288345	0.0915762	4.42448e-05
O35609	Scamp3	Secretory carrier-associated membrane protein 3	SCAM3_MOUSE	2.93013	0.0288499	0.0915762	1.52706e-05
P16330	Cnp	2',3'-cyclic-nucleotide 3'-phosphodiesterase	CN37_MOUSE	0.550276	0.0289405	0.0917039	0.000576746
Q60902	Eps15l1	Epidermal growth factor receptor substrate 15-like 1	EP15R_MOUSE	2.95955	0.0289879	0.0917039	3.63317e-05
Q9CYZ2	Tpd52l2	Tumor protein D54	TPD54_MOUSE	3.03654	0.0289936	0.0917039	2.74705e-05
P97351	Rps3a	40S ribosomal protein S3a	RS3A_MOUSE	1.11342	0.029065	0.0918205	0.000115745
Q9CRB6	Tppp3	Tubulin polymerization-promoting protein family member 3	TPPP3_MOUSE	3.20562	0.0292183	0.0921953	5.26543e-05
Q8CGC7	Eprs1	Bifunctional glutamate/proline--tRNA ligase	SYEP_MOUSE	2.8626	0.0293743	0.0925463	1.6276e-05
Q9QUR7	Pin1	Peptidyl-prolyl cis-trans isomerase NIMA-interacting 1	PIN1_MOUSE	3.19736	0.0293991	0.0925463	4.46105e-05
Q5SSL4	Abr	Active breakpoint cluster region-related protein	ABR_MOUSE	3.03789	0.0294633	0.0926389	3.38969e-05
P49615	Cdk5	Cyclin-dependent-like kinase 5	CDK5_MOUSE	3.16345	0.0295792	0.0928022	2.52586e-05
Q9DBG6	Rpn2	Dolichyl-diphosphooligosaccharide--protein glycosyltransferase subunit 2	RPN2_MOUSE	2.86434	0.029587	0.0928022	1.91453e-05
P62334	Psmc6	26S proteasome regulatory subunit 10B	PRS10_MOUSE	4.72477	0.0296354	0.0928022	6.49696e-05
Q9DCS9	Ndufb10	NADH dehydrogenase [ubiquinone] 1 beta subcomplex subunit 10	NDUBA_MOUSE	inf	0.0296548	0.0928022	2.07228e-05
O89053	Coro1a	Coronin-1A	COR1A_MOUSE	1.67037	0.0297788	0.0930806	4.47345e-05
Q9D051	Pdhb	Pyruvate dehydrogenase E1 component subunit beta, mitochondrial	ODPB_MOUSE	0.876436	0.0299381	0.0934688	8.34489e-05
Q61206	Pafah1b2	Platelet-activating factor acetylhydrolase IB subunit beta	PA1B2_MOUSE	1.21472	0.0299764	0.0934785	6.95857e-05
Q99L43	Cds2	Phosphatidate cytidylyltransferase 2	CDS2_MOUSE	0.95903	0.0300954	0.0937397	2.51262e-05
P34884	Mif	Macrophage migration inhibitory factor	MIF_MOUSE	1.02519	0.0302767	0.0941941	0.000216032
P60710	Actb	Actin, cytoplasmic 1	ACTB_MOUSE	1.94939	0.0303683	0.0943688	0.000270779
P61161	Actr2	Actin-related protein 2	ARP2_MOUSE	2.96177	0.0310783	0.0964625	2.9517e-05
P06151	Ldha	L-lactate dehydrogenase A chain	LDHA_MOUSE	1.31561	0.0312907	0.0970083	0.000332789
Q9EQQ9;Q9EQQ9-3	Oga	Protein O-GlcNAcase;Isoform 3 of Protein O-GlcNAcase	OGA_MOUSE	2.81464	0.0313978	0.0972273	1.56411e-05
Q91V41	Rab14	Ras-related protein Rab-14	RAB14_MOUSE	3.29297	0.0314633	0.0973169	6.88778e-05
O55131	Septin7	Septin-7	SEPT7_MOUSE	1.09963	0.0315849	0.0975793	0.000113463
Q9WV60	Gsk3b	Glycogen synthase kinase-3 beta	GSK3B_MOUSE	2.76245	0.0316737	0.0976427	2.70998e-05
P42567	Eps15	Epidermal growth factor receptor substrate 15	EPS15_MOUSE	2.71284	0.0316788	0.0976427	1.36273e-05
Q9EP69	Sacm1l	Phosphatidylinositide phosphatase SAC1	SAC1_MOUSE	3.05122	0.0319159	0.0982597	2.36211e-05
Q9JME5	Ap3b2	AP-3 complex subunit beta-2	AP3B2_MOUSE	3.07552	0.0320973	0.0987038	4.9669e-05
P17710-3	Hk1	Isoform HK1 of Hexokinase-1	HXK1_MOUSE	1.66964	0.0323721	0.099434	0.000287901
P30275	Ckmt1	Creatine kinase U-type, mitochondrial	KCRU_MOUSE	1.26651	0.0326378	0.100135	0.000282006
Q8BK64	Ahsa1	Activator of 90 kDa heat shock protein ATPase homolog 1	AHSA1_MOUSE	2.76081	0.0327585	0.100389	1.84187e-05
P46471	Psmc2	26S proteasome regulatory subunit 7	PRS7_MOUSE	2.91256	0.0327971	0.100392	3.85204e-05
P10639	Txn	Thioredoxin	THIO_MOUSE	1.3769	0.0328975	0.100583	0.000219522
Q9JKC6	Cend1	Cell cycle exit and neuronal differentiation protein 1	CEND_MOUSE	1.53983	0.0329637	0.100586	7.00958e-05
Q11011	Npepps	Puromycin-sensitive aminopeptidase	PSA_MOUSE	1.09747	0.032974	0.100586	3.39291e-05
Q3U0V1	Khsrp	Far upstream element-binding protein 2	FUBP2_MOUSE	2.72819	0.0330415	0.100663	1.41172e-05
Q64105	Spr	Sepiapterin reductase	SPRE_MOUSE	3.27723	0.0331102	0.100663	3.7013e-05
Q5SRX1;Q5SRX1-2	Tom1l2	TOM1-like protein 2;Isoform 2 of TOM1-like protein 2	TM1L2_MOUSE	3.09039	0.0331128	0.100663	8.06864e-05
P47857	Pfkm	ATP-dependent 6-phosphofructokinase, muscle type	PFKAM_MOUSE	1.33368	0.0333489	0.101059	7.69537e-05
Q8CDN6	Txnl1	Thioredoxin-like protein 1	TXNL1_MOUSE	1.05854	0.0333565	0.101059	6.80294e-05
P14685	Psmd3	26S proteasome non-ATPase regulatory subunit 3	PSMD3_MOUSE	2.59178	0.0333572	0.101059	9.99194e-06
P0CG49;P0CG50;P62983;P62984	Ubb;Ubc;Rps27a;Uba52	Polyubiquitin-B;Polyubiquitin-C;Ubiquitin-40S ribosomal protein S27a;Ubiquitin-60S ribosomal protein L40	UBB_MOUSE;UBC_MOUSE;RS27A_MOUSE;RL40_MOUSE	1.23136	0.0334435	0.101206	0.00101447
P19783	Cox4i1	Cytochrome c oxidase subunit 4 isoform 1, mitochondrial	COX41_MOUSE	0.75629	0.0335756	0.101428	0.000112172
P14094	Atp1b1	Sodium/potassium-transporting ATPase subunit beta-1	AT1B1_MOUSE	1.06258	0.0335931	0.101428	0.000398784
P01887	B2m	Beta-2-microglobulin	B2MG_MOUSE	0.600261	0.0337002	0.101635	4.57064e-05
Q9D3A9;Q9D3A9-4	Ttyh1	Protein tweety homolog 1;Isoform 4 of Protein tweety homolog 1	TTYH1_MOUSE	2.57239	0.0339314	0.102217	1.08464e-05
Q9D8N0	Eef1g	Elongation factor 1-gamma	EF1G_MOUSE	1.19064	0.0345198	0.103872	3.443e-05
O35887	Calu	Calumenin	CALU_MOUSE	0.865471	0.0347387	0.104369	0.000131694
P28660	Nckap1	Nck-associated protein 1	NCKP1_MOUSE	1.1753	0.0347636	0.104369	3.67883e-05
Q80SW1	Ahcyl1	S-adenosylhomocysteine hydrolase-like protein 1	SAHH2_MOUSE	2.84943	0.0351564	0.10543	3.67151e-05
P35546	Ret	Proto-oncogene tyrosine-protein kinase receptor Ret	RET_MOUSE	2.70758	0.0362469	0.108577	3.12899e-05
Q8CAQ8-2	Immt	Isoform 2 of MICOS complex subunit Mic60	MIC60_MOUSE	1.642	0.0365674	0.10936	4.86307e-05
P80316	Cct5	T-complex protein 1 subunit epsilon	TCPE_MOUSE	2.77463	0.0365904	0.10936	3.33583e-05
Q9CQI6	Cotl1	Coactosin-like protein	COTL1_MOUSE	3.12764	0.0367775	0.109763	6.0725e-05
Q3UVL4	Vps51	Vacuolar protein sorting-associated protein 51 homolog	VPS51_MOUSE	2.70478	0.0368077	0.109763	1.59619e-05
P51125;P51125-2;P51125-3;P51125-6	Cast	Calpastatin;Isoform 2 of Calpastatin;Isoform 3 of Calpastatin;Isoform 6 of Calpastatin	ICAL_MOUSE	2.74799	0.0368928	0.109893	3.46283e-05
Q9D898	Arpc5l	Actin-related protein 2/3 complex subunit 5-like protein	ARP5L_MOUSE	1.05468	0.0373458	0.111118	4.7068e-05
Q6NZL0	Soga3	Protein SOGA3	SOGA3_MOUSE	2.637	0.037595	0.111614	2.58886e-05
Q9CQX2	Cyb5b	Cytochrome b5 type B	CYB5B_MOUSE	2.63857	0.0376219	0.111614	2.6084e-05
Q9WVJ2	Psmd13	26S proteasome non-ATPase regulatory subunit 13	PSD13_MOUSE	3.59308	0.0376382	0.111614	6.3374e-05
Q9JJK2	Lancl2	LanC-like protein 2	LANC2_MOUSE	2.64488	0.0377246	0.111746	2.72549e-05
Q99K51	Pls3	Plastin-3	PLST_MOUSE	3.12375	0.0377756	0.111772	5.08617e-05
P30416	Fkbp4	Peptidyl-prolyl cis-trans isomerase FKBP4	FKBP4_MOUSE	-1.38395	0.0380908	0.112564	0.00309618
P46414	Cdkn1b	Cyclin-dependent kinase inhibitor 1B	CDN1B_MOUSE	2.51055	0.0381277	0.112564	1.32983e-05
Q8C8R3-2	Ank2	Isoform 2 of Ankyrin-2	ANK2_MOUSE	3.58798	0.0384018	0.113247	0.000176182
P70398	Usp9x	Probable ubiquitin carboxyl-terminal hydrolase FAF-X	USP9X_MOUSE	3.14797	0.038635	0.113808	5.32472e-05
Q9Z130	Hnrnpdl	Heterogeneous nuclear ribonucleoprotein D-like	HNRDL_MOUSE	2.86152	0.0387164	0.113922	3.42544e-05
Q8BGT8	Phyhipl	Phytanoyl-CoA hydroxylase-interacting protein-like	PHIPL_MOUSE	2.80765	0.0390175	0.114681	3.76764e-05
Q8JZU2	Slc25a1	Tricarboxylate transport protein, mitochondrial	TXTP_MOUSE	2.4661	0.0391711	0.115006	9.89466e-06
Q9R0K7	Atp2b2	Plasma membrane calcium-transporting ATPase 2	AT2B2_MOUSE	1.32572	0.0393411	0.115378	0.000120908
P36536	Sar1a	GTP-binding protein SAR1a	SAR1A_MOUSE	2.68829	0.0398322	0.116689	4.45911e-05
Q9D0L7;Q9D0L7-2	Armc10	Armadillo repeat-containing protein 10;Isoform 2 of Armadillo repeat-containing protein 10	ARM10_MOUSE	2.49392	0.0405545	0.118674	1.95073e-05
Q924M7	Mpi	Mannose-6-phosphate isomerase	MPI_MOUSE	2.50079	0.0406469	0.118814	1.48845e-05
P62748	Hpcal1	Hippocalcin-like protein 1	HPCL1_MOUSE	2.85503	0.0407384	0.11889	4.49045e-05
Q8BWR2	Pithd1	PITH domain-containing protein 1	PITH1_MOUSE	2.53914	0.0407622	0.11889	2.49073e-05
P42669	Pura	Transcriptional activator protein Pur-alpha	PURA_MOUSE	1.93733	0.0410558	0.119615	8.20202e-05
O08756	Hsd17b10	3-hydroxyacyl-CoA dehydrogenase type-2	HCD2_MOUSE	-0.735889	0.0413226	0.120179	6.03243e-05
Q8BP47	NARS1	Asparagine--tRNA ligase, cytoplasmic	SYNC_MOUSE	2.72276	0.0413861	0.120179	3.52726e-05
P28652	Camk2b	Calcium/calmodulin-dependent protein kinase type II subunit beta	KCC2B_MOUSE	1.28783	0.0414112	0.120179	5.61683e-05
Q91VM5	Rbmxl1	RNA binding motif protein, X-linked-like-1	RMXL1_MOUSE	2.41658	0.04143	0.120179	8.94619e-06
Q99JP7	Ggt7	Glutathione hydrolase 7	GGT7_MOUSE	2.5193	0.0416906	0.120803	2.88302e-05
Q99JR1	Sfxn1	Sideroflexin-1	SFXN1_MOUSE	2.55893	0.0418581	0.121156	4.18734e-05
P35235	Ptpn11	Tyrosine-protein phosphatase non-receptor type 11	PTN11_MOUSE	2.69796	0.0420041	0.121343	3.56493e-05
O88935	Syn1	Synapsin-1	SYN1_MOUSE	1.5473	0.0420139	0.121343	0.000126393
Q62059;Q62059-3	Vcan	Versican core protein;Isoform V2 of Versican core protein	CSPG2_MOUSE	2.41097	0.0424743	0.12254	1.63827e-05
P28184	Mt3	Metallothionein-3	MT3_MOUSE	1.35657	0.0427488	0.123198	6.27227e-05
Q9WV18	Gabbr1	Gamma-aminobutyric acid type B receptor subunit 1	GABR1_MOUSE	2.66451	0.042885	0.123457	1.93721e-05
Q9DCJ5	Ndufa8	NADH dehydrogenase [ubiquinone] 1 alpha subcomplex subunit 8	NDUA8_MOUSE	2.65397	0.0431424	0.124063	2.91339e-05
Q63912	Omg	Oligodendrocyte-myelin glycoprotein	OMGP_MOUSE	3.18277	0.0434955	0.124839	5.97032e-05
Q01065	Pde1b	Calcium/calmodulin-dependent 3',5'-cyclic nucleotide phosphodiesterase 1B	PDE1B_MOUSE	1.33468	0.0435059	0.124839	3.96602e-05
Q99L47	St13	Hsc70-interacting protein	F10A1_MOUSE	3.13197	0.0436117	0.125008	8.05254e-05
P35980	Rpl18	60S ribosomal protein L18	RL18_MOUSE	1.30037	0.0440573	0.126149	0.000698563
Q9DCW4	Etfb	Electron transfer flavoprotein subunit beta	ETFB_MOUSE	0.826742	0.0443735	0.126915	4.57091e-05
P61971	Nutf2	Nuclear transport factor 2	NTF2_MOUSE	2.41895	0.0444204	0.126915	2.79321e-05
Q99KJ8	Dctn2	Dynactin subunit 2	DCTN2_MOUSE	3.22456	0.0446141	0.127332	7.28781e-05
Q8K1M6	Dnm1l	Dynamin-1-like protein	DNM1L_MOUSE	1.48907	0.0448338	0.127715	6.15737e-05
Q9CQ62	Decr1	2,4-dienoyl-CoA reductase, mitochondrial	DECR_MOUSE	2.30965	0.0448443	0.127715	8.02794e-06
P34022	Ranbp1	Ran-specific GTPase-activating protein	RANG_MOUSE	2.35399	0.0450361	0.128056	1.89913e-05
Q8CAY6	Acat2	Acetyl-CoA acetyltransferase, cytosolic	THIC_MOUSE	0.976792	0.0450714	0.128056	4.40493e-05
Q8R574	Prpsap2	Phosphoribosyl pyrophosphate synthase-associated protein 2	KPRB_MOUSE	3.25931	0.0451485	0.128056	5.60576e-05
Q9EPJ9;Q9EPJ9-2	Arfgap1	ADP-ribosylation factor GTPase-activating protein 1;Isoform 2 of ADP-ribosylation factor GTPase-activating protein 1	ARFG1_MOUSE	2.41075	0.0451565	0.128056	2.94114e-05
D3YVE8	Slc35g2	Solute carrier family 35 member G2	S35G2_MOUSE	2.24631	0.0453623	0.128385	8.43771e-06
Q07797	Lgals3bp	Galectin-3-binding protein	LG3BP_MOUSE	-2.32227	0.0453693	0.128385	0.000298156
P97822;P97822-2	Anp32e	Acidic leucine-rich nuclear phosphoprotein 32 family member E;Isoform 2 of Acidic leucine-rich nuclear phosphoprotein 32 family member E	AN32E_MOUSE	2.42415	0.046138	0.130411	5.56839e-05
Q9R0Q7	Ptges3	Prostaglandin E synthase 3	TEBP_MOUSE	2.33301	0.0461833	0.130411	2.63338e-05
O55135	Eif6	Eukaryotic translation initiation factor 6	IF6_MOUSE	2.43563	0.0463304	0.130688	1.99604e-05
E9Q3L2	Pi4ka	Phosphatidylinositol 4-kinase alpha	PI4KA_MOUSE	2.61588	0.0468893	0.132124	3.41266e-05
P10605	Ctsb	Cathepsin B	CATB_MOUSE	2.88611	0.0469622	0.13219	1.44728e-05
P57780	Actn4	Alpha-actinin-4	ACTN4_MOUSE	1.22212	0.0470411	0.132272	9.45976e-05
P68510	Ywhah	14-3-3 protein eta	1433F_MOUSE	3.2103	0.0471442	0.132422	0.000131214
P62855	Rps26	40S ribosomal protein S26	RS26_MOUSE	-0.888673	0.0473919	0.132977	0.000118747
P35283	Rab12	Ras-related protein Rab-12	RAB12_MOUSE	2.49877	0.0476004	0.133422	1.44248e-05
Q80XI4	Pip4k2b	Phosphatidylinositol 5-phosphate 4-kinase type-2 beta	PI42B_MOUSE	1.0871	0.0479783	0.134339	3.36508e-05
P70280	Vamp7	Vesicle-associated membrane protein 7	VAMP7_MOUSE	2.20081	0.04898	0.137	1.13752e-05
Q7TQH0;Q7TQH0-2;Q7TQH0-3	Atxn2l	Ataxin-2-like protein;Isoform 2 of Ataxin-2-like protein;Isoform 3 of Ataxin-2-like protein	ATX2L_MOUSE	2.11911	0.0490687	0.137104	1.34267e-05
Q8VHC3	Selenom	Selenoprotein M	SELM_MOUSE	2.16766	0.0492668	0.137513	9.25781e-06
Q8BGD9	Eif4b	Eukaryotic translation initiation factor 4B	IF4B_MOUSE	2.68099	0.0493527	0.137548	4.92551e-05
P00920	Ca2	Carbonic anhydrase 2	CAH2_MOUSE	0.649658	0.0494125	0.137548	0.000122607
Q91ZX7	Lrp1	Prolow-density lipoprotein receptor-related protein 1	LRP1_MOUSE	2.25167	0.0494345	0.137548	2.79313e-05
Q9QYX7	Pclo	Protein piccolo	PCLO_MOUSE	2.30954	0.0501565	0.139344	2.0747e-05
B2RSH2	Gnai1	Guanine nucleotide-binding protein G(i) subunit alpha-1	GNAI1_MOUSE	1.17984	0.0502074	0.139344	4.17449e-05
Q9DB75;Q9DB75-2	Cdip1	Cell death-inducing p53-target protein 1;Isoform 2 of Cell death-inducing p53-target protein 1	CDIP1_MOUSE	2.7012	0.0502371	0.139344	3.36628e-05
Q8R464	Cadm4	Cell adhesion molecule 4	CADM4_MOUSE	2.36235	0.0510363	0.141413	9.34015e-06
P55096	Abcd3	ATP-binding cassette sub-family D member 3	ABCD3_MOUSE	1.01062	0.0514987	0.14253	2.28395e-05
Q8R127	Sccpdh	Saccharopine dehydrogenase-like oxidoreductase	SCPDL_MOUSE	2.17347	0.0515467	0.14253	2.5208e-05
Q99020	Hnrnpab	Heterogeneous nuclear ribonucleoprotein A/B	ROAA_MOUSE	2.18896	0.0517455	0.142826	3.35883e-05
Q99KQ4	Nampt	Nicotinamide phosphoribosyltransferase	NAMPT_MOUSE	2.53525	0.051761	0.142826	3.19899e-05
Q03958	Pfdn6	Prefoldin subunit 6	PFD6_MOUSE	2.14119	0.0519789	0.143177	1.95263e-05
P70404	Idh3g	Isocitrate dehydrogenase [NAD] subunit gamma 1, mitochondrial	IDHG1_MOUSE	2.97201	0.0520477	0.143177	0.000840895
P29341	Pabpc1	Polyadenylate-binding protein 1	PABP1_MOUSE	3.09392	0.0520497	0.143177	8.35458e-05
P39688	Fyn	Tyrosine-protein kinase Fyn	FYN_MOUSE	2.5513	0.0521238	0.143233	2.21405e-05
P48453;P48453-2	Ppp3cb	Serine/threonine-protein phosphatase 2B catalytic subunit beta isoform;Isoform 1 of Serine/threonine-protein phosphatase 2B catalytic subunit beta isoform	PP2BB_MOUSE	2.52982	0.0531346	0.145715	2.10983e-05
O54931;O54931-4	Akap2	A-kinase anchor protein 2;Isoform 4 of A-kinase anchor protein 2	AKAP2_MOUSE	2.10856	0.053381	0.145715	1.7271e-05
P62500;P62500-3	Tsc22d1	TSC22 domain family protein 1;Isoform 3 of TSC22 domain family protein 1	T22D1_MOUSE	2.12697	0.0536247	0.145715	3.24489e-05
Q9JI91	Actn2	Alpha-actinin-2	ACTN2_MOUSE	2.06555	0.0539415	0.145715	1.0874e-05
P11627	L1cam	Neural cell adhesion molecule L1	L1CAM_MOUSE	2.40141	0.0541218	0.145715	2.84156e-05
Q9CR16	Ppid	Peptidyl-prolyl cis-trans isomerase D	PPID_MOUSE	2.86249	0.0542433	0.145715	5.2408e-05
Q99PJ0	Ntm	Neurotrimin	NTRI_MOUSE	2.06709	0.0545853	0.145715	1.69749e-05
Q791T5;Q791T5-2	Mtch1	Mitochondrial carrier homolog 1;Isoform 2 of Mitochondrial carrier homolog 1	MTCH1_MOUSE	0.700123	0.0554525	0.145715	7.30492e-05
P28481;P28481-1;P28481-2;P28481-4;P28481-5;P28481-6;P28481-7	Col2a1	Collagen alpha-1(II) chain;Isoform 2 of Collagen alpha-1(II) chain;Isoform 3 of Collagen alpha-1(II) chain;Isoform 4 of Collagen alpha-1(II) chain;Isoform 5 of Collagen alpha-1(II) chain;Isoform 6 of Collagen alpha-1(II) chain;Isoform 7 of Collagen alpha-1(II) chain	CO2A1_MOUSE	2.175	0.0554564	0.145715	0.000710472
Q3THG9	Aarsd1	Alanyl-tRNA editing protein Aarsd1	AASD1_MOUSE	2.2578	0.055571	0.145715	1.45738e-05
Q9R1V7;Q9R1V7-2;Q9R1V7-3;Q9R1V7-4	Adam23	Disintegrin and metalloproteinase domain-containing protein 23;Isoform Beta of Disintegrin and metalloproteinase domain-containing protein 23;Isoform Gamma of Disintegrin and metalloproteinase domain-containing protein 23;Isoform Delta of Disintegrin and metalloproteinase domain-containing protein 23	ADA23_MOUSE	2.03485	0.0559176	0.145715	1.44803e-05
Q91YS8	Camk1	Calcium/calmodulin-dependent protein kinase type 1	KCC1A_MOUSE	2.32051	0.0560008	0.145715	2.59139e-05
Q6Q477;Q6Q477-2	Atp2b4	Plasma membrane calcium-transporting ATPase 4;Isoform 2 of Plasma membrane calcium-transporting ATPase 4	AT2B4_MOUSE	1.10919	0.0561117	0.145715	3.69912e-05
Q5U3K5	Rabl6	Rab-like protein 6	RABL6_MOUSE	0.651851	0.0561229	0.145715	1.31009e-05
Q9CPU4	Mgst3	Microsomal glutathione S-transferase 3	MGST3_MOUSE	0.632895	0.0561555	0.145715	0.000128666
P17879;Q61696	Hspa1b;Hspa1a	Heat shock 70 kDa protein 1B;Heat shock 70 kDa protein 1A	HS71B_MOUSE;HS71A_MOUSE	1.21358	0.0568823	0.145715	0.000139791
P11087;P11087-2	Col1a1	Collagen alpha-1(I) chain;Isoform 2 of Collagen alpha-1(I) chain	CO1A1_MOUSE	1.87301	0.0570581	0.145715	0.000267342
Q91VZ6	Smap1	Stromal membrane-associated protein 1	SMAP1_MOUSE	2.46431	0.0572583	0.145715	2.19068e-05
P63330	Ppp2ca	Serine/threonine-protein phosphatase 2A catalytic subunit alpha isoform	PP2AA_MOUSE	2.8376	0.0574343	0.145715	9.24449e-05
Q9JII5;Q9JII5-2	Dazap1	DAZ-associated protein 1;Isoform 2 of DAZ-associated protein 1	DAZP1_MOUSE	inf	0.057692	0.145715	8.14455e-06
Q91XU3	Pip4k2c	Phosphatidylinositol 5-phosphate 4-kinase type-2 gamma	PI42C_MOUSE	inf	0.0577296	0.145715	7.18903e-06
Q9JIF7	Copb1	Coatomer subunit beta	COPB_MOUSE	inf	0.0577603	0.145715	6.04645e-06
P54823	Ddx6	Probable ATP-dependent RNA helicase DDX6	DDX6_MOUSE	inf	0.0577895	0.145715	7.3744e-06
O54901	Cd200	OX-2 membrane glycoprotein	OX2G_MOUSE	inf	0.0578008	0.145715	1.88876e-05
Q923T9;Q923T9-2;Q923T9-3	Camk2g	Calcium/calmodulin-dependent protein kinase type II subunit gamma;Isoform 2 of Calcium/calmodulin-dependent protein kinase type II subunit gamma;Isoform 3 of Calcium/calmodulin-dependent protein kinase type II subunit gamma	KCC2G_MOUSE	inf	0.0578105	0.145715	6.28714e-06
P14869	Rplp0	60S acidic ribosomal protein P0	RLA0_MOUSE	inf	0.0578175	0.145715	6.70236e-06
Q6PIP5	Nudcd1	NudC domain-containing protein 1	NUDC1_MOUSE	inf	0.0578177	0.145715	1.68451e-05
Q9Z127	Slc7a5	Large neutral amino acids transporter small subunit 1	LAT1_MOUSE	inf	0.0578399	0.145715	5.49376e-06
Q3U0M1;Q3U0M1-2	Trappc9	Trafficking protein particle complex subunit 9;Isoform 2 of Trafficking protein particle complex subunit 9	TPPC9_MOUSE	inf	0.0578574	0.145715	1.30531e-05
P56371	Rab4a	Ras-related protein Rab-4A	RAB4A_MOUSE	inf	0.0578851	0.145715	1.12366e-05
Q99JT2;Q99KH8;Q9Z2W1	Stk26;Stk24;Stk25	Serine/threonine-protein kinase 26;Serine/threonine-protein kinase 24;Serine/threonine-protein kinase 25	STK26_MOUSE;STK24_MOUSE;STK25_MOUSE	inf	0.0579285	0.145715	3.63114e-06
Q922E4	Pcyt2	Ethanolamine-phosphate cytidylyltransferase	PCY2_MOUSE	inf	0.0579717	0.145715	8.81282e-06
P35585	Ap1m1	AP-1 complex subunit mu-1	AP1M1_MOUSE	inf	0.0579897	0.145715	3.93954e-06
P17742	Ppia	Peptidyl-prolyl cis-trans isomerase A	PPIA_MOUSE	0.957563	0.0580109	0.145715	0.000413842
Q9Z204;Q9Z204-2;Q9Z204-3;Q9Z204-4;Q9Z204-5	Hnrnpc	Heterogeneous nuclear ribonucleoproteins C1/C2;Isoform C1 of Heterogeneous nuclear ribonucleoproteins C1/C2;Isoform 3 of Heterogeneous nuclear ribonucleoproteins C1/C2;Isoform 4 of Heterogeneous nuclear ribonucleoproteins C1/C2;Isoform 5 of Heterogeneous nuclear ribonucleoproteins C1/C2	HNRPC_MOUSE	2.0486	0.0580196	0.145715	3.24495e-05
Q8BK63;Q8BK63-2	Csnk1a1	Casein kinase I isoform alpha;Isoform 2 of Casein kinase I isoform alpha	KC1A_MOUSE	inf	0.0580419	0.145715	4.24093e-06
Q9QXW9	Slc7a8	Large neutral amino acids transporter small subunit 2	LAT2_MOUSE	inf	0.0580475	0.145715	1.19313e-05
P80560	Ptprn2	Receptor-type tyrosine-protein phosphatase N2	PTPR2_MOUSE	inf	0.0580553	0.145715	1.00628e-05
Q8CI61	Bag4	BAG family molecular chaperone regulator 4	BAG4_MOUSE	inf	0.0580641	0.145715	9.14496e-06
Q8VD62	Bles03	UPF0696 protein C11orf68 homolog	CK068_MOUSE	inf	0.0581337	0.145715	7.89514e-06
Q99LP6	Grpel1	GrpE protein homolog 1, mitochondrial	GRPE1_MOUSE	inf	0.0581408	0.145715	6.63705e-06
Q8CHU3;Q8CHU3-2	Epn2	Epsin-2;Isoform 2 of Epsin-2	EPN2_MOUSE	inf	0.0581548	0.145715	1.07846e-05
Q08460;Q08460-2;Q08460-3;Q08460-4;Q08460-5	Kcnma1	Calcium-activated potassium channel subunit alpha-1;Isoform 2 of Calcium-activated potassium channel subunit alpha-1;Isoform 3 of Calcium-activated potassium channel subunit alpha-1;Isoform 4 of Calcium-activated potassium channel subunit alpha-1;Isoform 5 of Calcium-activated potassium channel subunit alpha-1	KCMA1_MOUSE	inf	0.0581619	0.145715	1.12887e-05
Q3UHB8	Ccdc177	Coiled-coil domain-containing protein 177	CC177_MOUSE	inf	0.0582012	0.145715	4.59222e-06
Q8BSL7	Arf2	ADP-ribosylation factor 2	ARF2_MOUSE	inf	0.0582325	0.145715	5.55858e-06
Q69ZF3	Gba2	Non-lysosomal glucosylceramidase	GBA2_MOUSE	inf	0.0582345	0.145715	9.04134e-06
Q8R3Q2	Ppp6r2	Serine/threonine-protein phosphatase 6 regulatory subunit 2	PP6R2_MOUSE	inf	0.0582605	0.145715	4.84212e-06
Q3UKC1	Tax1bp1	Tax1-binding protein 1 homolog	TAXB1_MOUSE	inf	0.0582647	0.145715	1.08139e-05
Q8BMI3	Gga3	ADP-ribosylation factor-binding protein GGA3	GGA3_MOUSE	inf	0.0582744	0.145715	5.76506e-06
P27612	Plaa	Phospholipase A-2-activating protein	PLAP_MOUSE	inf	0.0582968	0.145715	7.13939e-06
Q9CX86	Hnrnpa0	Heterogeneous nuclear ribonucleoprotein A0	ROA0_MOUSE	inf	0.0583054	0.145715	7.1099e-06
Q6P9K9	Nrxn3	Neurexin-3	NRX3A_MOUSE	inf	0.0583066	0.145715	9.27108e-06
Q9QZS3;Q9QZS3-2;Q9QZS3-3;Q9QZS3-4	Numb	Protein numb homolog;Isoform 2 of Protein numb homolog;Isoform 3 of Protein numb homolog;Isoform 4 of Protein numb homolog	NUMB_MOUSE	inf	0.0583153	0.145715	1.08661e-05
Q8K353	Cystm1	Cysteine-rich and transmembrane domain-containing protein 1	CYTM1_MOUSE	inf	0.0583207	0.145715	8.75878e-06
Q5F2E8	Taok1	Serine/threonine-protein kinase TAO1	TAOK1_MOUSE	inf	0.0583345	0.145715	4.64525e-06
Q91YL2	Rnf126	E3 ubiquitin-protein ligase RNF126	RN126_MOUSE	inf	0.0583378	0.145715	9.58323e-06
Q9JKB1	Uchl3	Ubiquitin carboxyl-terminal hydrolase isozyme L3	UCHL3_MOUSE	inf	0.0583885	0.145715	4.0647e-06
Q8BIF0;Q8BIF0-2	Cd99l2	CD99 antigen-like protein 2;Isoform 2 of CD99 antigen-like protein 2	C99L2_MOUSE	inf	0.058392	0.145715	6.00599e-06
Q9DCC4	Pycr3	Pyrroline-5-carboxylate reductase 3	P5CR3_MOUSE	inf	0.0584044	0.145715	8.57252e-06
Q80VP0	Tecpr1	Tectonin beta-propeller repeat-containing protein 1	TCPR1_MOUSE	inf	0.0584204	0.145715	5.80719e-06
P48036	Anxa5	Annexin A5	ANXA5_MOUSE	1.16772	0.0584342	0.145715	0.00010723
P97798;P97798-2;P97798-3;P97798-4;P97798-5	Neo1	Neogenin;Isoform 2 of Neogenin;Isoform 3 of Neogenin;Isoform 4 of Neogenin;Isoform 5 of Neogenin	NEO1_MOUSE	inf	0.0584342	0.145715	5.98825e-06
Q9EQG9;Q9EQG9-2	Cert1	Ceramide transfer protein;Isoform 2 of Ceramide transfer protein	CERT_MOUSE	inf	0.0584483	0.145715	1.06012e-05
Q3TLI0	Trappc10	Trafficking protein particle complex subunit 10	TPC10_MOUSE	inf	0.0584486	0.145715	1.04041e-05
Q9QZD9	Eif3i	Eukaryotic translation initiation factor 3 subunit I	EIF3I_MOUSE	inf	0.0584936	0.145715	3.84023e-06
Q9QWW1;Q9QWW1-2	Homer2	Homer protein homolog 2;Isoform 2 of Homer protein homolog 2	HOME2_MOUSE	inf	0.0584979	0.145715	5.76295e-06
Q91VR7	Map1lc3a	Microtubule-associated proteins 1A/1B light chain 3A	MLP3A_MOUSE	inf	0.0585031	0.145715	1.18555e-05
Q8JZK9	Hmgcs1	Hydroxymethylglutaryl-CoA synthase, cytoplasmic	HMCS1_MOUSE	inf	0.0585151	0.145715	1.23113e-05
Q8R1G2	Cmbl	Carboxymethylenebutenolidase homolog	CMBL_MOUSE	inf	0.0586017	0.145715	1.00629e-05
O70152	Dpm1	Dolichol-phosphate mannosyltransferase subunit 1	DPM1_MOUSE	inf	0.0586079	0.145715	8.15837e-06
Q8C167;Q8C167-2	Prepl	Prolyl endopeptidase-like;Isoform 2 of Prolyl endopeptidase-like	PPCEL_MOUSE	inf	0.0586308	0.145715	8.93588e-06
Q9CWF2	Tubb2b	Tubulin beta-2B chain	TBB2B_MOUSE	inf	0.0586576	0.145715	9.09758e-05
Q62426	Cstb	Cystatin-B	CYTB_MOUSE	2.57697	0.0587132	0.145715	5.27655e-05
Q922D8	Mthfd1	C-1-tetrahydrofolate synthase, cytoplasmic	C1TC_MOUSE	inf	0.0589022	0.145715	5.27942e-06
Q61165	Slc9a1	Sodium/hydrogen exchanger 1	SL9A1_MOUSE	inf	0.0589125	0.145715	1.31691e-05
P41241	Csk	Tyrosine-protein kinase CSK	CSK_MOUSE	inf	0.0589142	0.145715	7.49421e-06
P62069;Q9D9M2;Q9D9M2-2	Usp46;Usp12;Usp12	Ubiquitin carboxyl-terminal hydrolase 46;Ubiquitin carboxyl-terminal hydrolase 12;Isoform 2 of Ubiquitin carboxyl-terminal hydrolase 12	UBP46_MOUSE;UBP12_MOUSE;UBP12_MOUSE	inf	0.058919	0.145715	9.1038e-06
A2ADY9	Ddi2	Protein DDI1 homolog 2	DDI2_MOUSE	inf	0.0589234	0.145715	3.40098e-06
Q8R5H6	Wasf1	Wiskott-Aldrich syndrome protein family member 1	WASF1_MOUSE	inf	0.0589363	0.145715	1.04319e-05
Q9QZB7	Actr10	Actin-related protein 10	ARP10_MOUSE	inf	0.0589471	0.145715	1.03644e-05
Q8BGE6	Atg4b	Cysteine protease ATG4B	ATG4B_MOUSE	inf	0.0589856	0.145715	2.91589e-06
Q9JJU8	Sh3bgrl	SH3 domain-binding glutamic acid-rich-like protein	SH3L1_MOUSE	2.76986	0.0590076	0.145715	3.81603e-05
Q9DAM7	Tmem263	Transmembrane protein 263	TM263_MOUSE	inf	0.0590155	0.145715	2.48942e-05
O70228	Atp9a	Probable phospholipid-transporting ATPase IIA	ATP9A_MOUSE	inf	0.0590179	0.145715	1.09152e-05
Q9Z1Q2	Abhd16a	Phosphatidylserine lipase ABHD16A	ABHGA_MOUSE	inf	0.0591187	0.145715	1.3614e-05
P26039	Tln1	Talin-1	TLN1_MOUSE	inf	0.0591192	0.145715	5.23441e-06
O70305;O70305-2;O70305-3	Atxn2	Ataxin-2;Isoform 2 of Ataxin-2;Isoform 3 of Ataxin-2	ATX2_MOUSE	inf	0.0591244	0.145715	2.44587e-06
Q8R5M8;Q8R5M8-2;Q8R5M8-3;Q8R5M8-4;Q8R5M8-6;Q8R5M8-7	Cadm1	Cell adhesion molecule 1;Isoform 2 of Cell adhesion molecule 1;Isoform 3 of Cell adhesion molecule 1;Isoform 4 of Cell adhesion molecule 1;Isoform 6 of Cell adhesion molecule 1;Isoform 7 of Cell adhesion molecule 1	CADM1_MOUSE	inf	0.0591976	0.145715	1.13492e-05
P57776	Eef1d	Elongation factor 1-delta	EF1D_MOUSE	2.06509	0.059217	0.145715	1.45273e-05
Q9Z1D1	Eif3g	Eukaryotic translation initiation factor 3 subunit G	EIF3G_MOUSE	inf	0.0592183	0.145715	4.80879e-06
Q61584;Q61584-2;Q61584-3;Q61584-4;Q61584-5;Q61584-6	Fxr1	Fragile X mental retardation syndrome-related protein 1;Isoform A of Fragile X mental retardation syndrome-related protein 1;Isoform B of Fragile X mental retardation syndrome-related protein 1;Isoform C of Fragile X mental retardation syndrome-related protein 1;Isoform D of Fragile X mental retardation syndrome-related protein 1;Isoform F of Fragile X mental retardation syndrome-related protein 1	FXR1_MOUSE	inf	0.0592494	0.145715	1.20612e-05
Q80XU3	Nucks1	Nuclear ubiquitous casein and cyclin-dependent kinase substrate 1	NUCKS_MOUSE	1.65717	0.0592561	0.145715	0.000115231
Q05186	Rcn1	Reticulocalbin-1	RCN1_MOUSE	inf	0.0592708	0.145715	8.39443e-06
Q149L6	Dnajb14	DnaJ homolog subfamily B member 14	DJB14_MOUSE	inf	0.0593292	0.145715	1.22744e-05
A2AJA9	Ajm1	Apical junction component 1 homolog	AJM1_MOUSE	inf	0.0593403	0.145715	2.963e-05
Q8C1A5	Thop1	Thimet oligopeptidase	THOP1_MOUSE	inf	0.0593546	0.145715	5.96658e-06
Q99J77	Nans	Sialic acid synthase	SIAS_MOUSE	inf	0.0593951	0.145715	3.56499e-06
O88653	Lamtor3	Ragulator complex protein LAMTOR3	LTOR3_MOUSE	inf	0.0594462	0.145715	5.05582e-06
P54822	Adsl	Adenylosuccinate lyase	PUR8_MOUSE	inf	0.0595443	0.145715	5.55867e-06
Q61937	Npm1	Nucleophosmin	NPM_MOUSE	1.37161	0.0596102	0.145715	9.02145e-05
O70507	Hcn4	Potassium/sodium hyperpolarization-activated cyclic nucleotide-gated channel 4	HCN4_MOUSE	inf	0.0596378	0.145715	7.79814e-06
P57716	Ncstn	Nicastrin	NICA_MOUSE	inf	0.0596877	0.145715	6.51808e-06
Q3V1L4	Nt5c2	Cytosolic purine 5'-nucleotidase	5NTC_MOUSE	inf	0.0596988	0.145715	1.69191e-05
Q8BNY6	Ncs1	Neuronal calcium sensor 1	NCS1_MOUSE	inf	0.0597188	0.145715	5.27412e-06
Q8VDJ3	Hdlbp	Vigilin	VIGLN_MOUSE	inf	0.0598387	0.145715	6.25164e-06
P28658	Atxn10	Ataxin-10	ATX10_MOUSE	inf	0.0598636	0.145715	8.65183e-06
O35239	Ptpn9	Tyrosine-protein phosphatase non-receptor type 9	PTN9_MOUSE	inf	0.0598636	0.145715	4.52176e-06
Q9ES28-5	Arhgef7	Isoform E of Rho guanine nucleotide exchange factor 7	ARHG7_MOUSE	inf	0.0599162	0.145715	1.15836e-05
P46638	Rab11b	Ras-related protein Rab-11B	RB11B_MOUSE	2.73256	0.0599338	0.145715	7.8811e-05
Q7TPB0	Plppr3	Phospholipid phosphatase-related protein type 3	PLPR3_MOUSE	inf	0.0599789	0.145715	6.5715e-06
P70425	Rit2	GTP-binding protein Rit2	RIT2_MOUSE	inf	0.0600319	0.145715	7.67231e-06
Q3U1F9	Pag1	Phosphoprotein associated with glycosphingolipid-enriched microdomains 1	PHAG1_MOUSE	inf	0.0600976	0.145715	2.69336e-06
Q8VD37	Sgip1	SH3-containing GRB2-like protein 3-interacting protein 1	SGIP1_MOUSE	inf	0.0601047	0.145715	4.42664e-06
Q9Z140	Cpne6	Copine-6	CPNE6_MOUSE	inf	0.0601232	0.145715	9.11619e-06
Q60854	Serpinb6	Serpin B6	SPB6_MOUSE	inf	0.060261	0.145715	3.21865e-06
Q9CQK7	Rwdd1	RWD domain-containing protein 1	RWDD1_MOUSE	inf	0.0602623	0.145715	3.75694e-06
Q6P5E8	Dgkq	Diacylglycerol kinase theta	DGKQ_MOUSE	inf	0.0602686	0.145715	0.000239013
Q9DBR3;Q9DBR3-2;Q9DBR3-3	Armc8	Armadillo repeat-containing protein 8;Isoform 2 of Armadillo repeat-containing protein 8;Isoform 3 of Armadillo repeat-containing protein 8	ARMC8_MOUSE	inf	0.0602939	0.145715	6.49203e-06
Q9CZ04;Q9CZ04-2	Cops7a	COP9 signalosome complex subunit 7a;Isoform 2 of COP9 signalosome complex subunit 7a	CSN7A_MOUSE	inf	0.0603344	0.145715	1.00273e-05
Q9ER35	Fn3k	Fructosamine-3-kinase	FN3K_MOUSE	inf	0.0605644	0.145715	1.22878e-05
P97792	Cxadr	Coxsackievirus and adenovirus receptor homolog	CXAR_MOUSE	inf	0.0606289	0.145715	7.3702e-06
Q8CC35;Q8CC35-2;Q8CC35-3	Synpo	Synaptopodin;Isoform 2 of Synaptopodin;Isoform 3 of Synaptopodin	SYNPO_MOUSE	inf	0.0606956	0.145715	5.77508e-06
Q8BVI5	Stx16	Syntaxin-16	STX16_MOUSE	inf	0.0607372	0.145715	2.52755e-06
Q9R1L5	Mast1	Microtubule-associated serine/threonine-protein kinase 1	MAST1_MOUSE	inf	0.0607662	0.145715	6.41095e-06
P27048;P63163	Snrpb;Snrpn	Small nuclear ribonucleoprotein-associated protein B;Small nuclear ribonucleoprotein-associated protein N	RSMB_MOUSE;RSMN_MOUSE	inf	0.0608164	0.145715	5.58196e-06
Q8CI71	Vps50	Syndetin	VPS50_MOUSE	inf	0.0608205	0.145715	6.0069e-06
P50571	Gabrb1	Gamma-aminobutyric acid receptor subunit beta-1	GBRB1_MOUSE	inf	0.0608852	0.145715	6.52838e-06
Q80U23-2	Snph	Isoform 2 of Syntaphilin	SNPH_MOUSE	inf	0.0608925	0.145715	4.82788e-06
Q8BLV3;Q8BLV3-2	Slc9a7	Sodium/hydrogen exchanger 7;Isoform 2 of Sodium/hydrogen exchanger 7	SL9A7_MOUSE	inf	0.0609587	0.145715	7.18763e-06
P47856;P47856-2	Gfpt1	Glutamine--fructose-6-phosphate aminotransferase [isomerizing] 1;Isoform 2 of Glutamine--fructose-6-phosphate aminotransferase [isomerizing] 1	GFPT1_MOUSE	inf	0.0610777	0.145715	3.12482e-06
Q9DB05	Napa	Alpha-soluble NSF attachment protein	SNAA_MOUSE	inf	0.0611888	0.145715	1.23386e-05
Q8VHI6	Wasf3	Wiskott-Aldrich syndrome protein family member 3	WASF3_MOUSE	1.87812	0.0611932	0.145715	5.78362e-05
P52479;P52479-2	Usp10	Ubiquitin carboxyl-terminal hydrolase 10;Isoform 2 of Ubiquitin carboxyl-terminal hydrolase 10	UBP10_MOUSE	inf	0.061196	0.145715	4.0379e-06
Q9QXA5	Lsm4	U6 snRNA-associated Sm-like protein LSm4	LSM4_MOUSE	inf	0.0612272	0.145715	1.78405e-05
Q8BJU0;Q8BJU0-2	Sgta	Small glutamine-rich tetratricopeptide repeat-containing protein alpha;Isoform 2 of Small glutamine-rich tetratricopeptide repeat-containing protein alpha	SGTA_MOUSE	inf	0.0612297	0.145715	4.04058e-06
Q9WV34;Q9WV34-2	Mpp2	MAGUK p55 subfamily member 2;Isoform 2 of MAGUK p55 subfamily member 2	MPP2_MOUSE	inf	0.061243	0.145715	1.31061e-05
Q8C0D7;Q8C0D7-2;Q8C0D7-3;Q8C0D7-4;Q8C0D7-5;Q9D8Y8;Q9D8Y8-2	Ing4;Ing4;Ing4;Ing4;Ing4;Ing5;Ing5	Inhibitor of growth protein 4;Isoform 2 of Inhibitor of growth protein 4;Isoform 3 of Inhibitor of growth protein 4;Isoform 4 of Inhibitor of growth protein 4;Isoform 5 of Inhibitor of growth protein 4;Inhibitor of growth protein 5;Isoform 2 of Inhibitor of growth protein 5	ING4_MOUSE;ING4_MOUSE;ING4_MOUSE;ING4_MOUSE;ING4_MOUSE;ING5_MOUSE;ING5_MOUSE	inf	0.0612661	0.145715	5.1152e-05
Q3UHI4	Tmed8	Protein TMED8	TMED8_MOUSE	inf	0.0613071	0.145715	3.64715e-06
O88507	Cntfr	Ciliary neurotrophic factor receptor subunit alpha	CNTFR_MOUSE	inf	0.0613696	0.145715	4.51571e-06
P52503	Ndufs6	NADH dehydrogenase [ubiquinone] iron-sulfur protein 6, mitochondrial	NDUS6_MOUSE	2.24576	0.0615575	0.145715	1.41709e-05
O88746	Tom1	Target of Myb protein 1	TOM1_MOUSE	inf	0.0615718	0.145715	6.23117e-06
Q6PIC6	Atp1a3	Sodium/potassium-transporting ATPase subunit alpha-3	AT1A3_MOUSE	1.05139	0.0615961	0.145715	0.000727806
Q80YE4;Q80YE4-2;Q80YE4-3	Aatk	Serine/threonine-protein kinase LMTK1;Isoform 2 of Serine/threonine-protein kinase LMTK1;Isoform 3 of Serine/threonine-protein kinase LMTK1	LMTK1_MOUSE	inf	0.0615972	0.145715	4.3692e-06
P37040	Por	NADPH--cytochrome P450 reductase	NCPR_MOUSE	inf	0.0616836	0.145715	1.45206e-05
Q9WUD1	Stub1	STIP1 homology and U box-containing protein 1	CHIP_MOUSE	inf	0.0616944	0.145715	6.46901e-06
O35639	Anxa3	Annexin A3	ANXA3_MOUSE	inf	0.0617753	0.145715	1.04857e-05
O55017;O55017-2	Cacna1b	Voltage-dependent N-type calcium channel subunit alpha-1B;Isoform NB2 of Voltage-dependent N-type calcium channel subunit alpha-1B	CAC1B_MOUSE	inf	0.0618346	0.145715	2.74804e-05
Q9CWJ9	Atic	Bifunctional purine biosynthesis protein PURH	PUR9_MOUSE	inf	0.0618381	0.145715	5.65401e-06
Q9WTU3;Q9WTU3-3;Q9WTU3-5	Scn8a	Sodium channel protein type 8 subunit alpha;Isoform 3 of Sodium channel protein type 8 subunit alpha;Isoform 5 of Sodium channel protein type 8 subunit alpha	SCN8A_MOUSE	inf	0.0619545	0.145715	3.37703e-06
Q68EF6	Begain	Brain-enriched guanylate kinase-associated protein	BEGIN_MOUSE	inf	0.0620366	0.145715	6.73077e-06
Q61527;Q61527-2;Q61527-3	Erbb4	Receptor tyrosine-protein kinase erbB-4;Isoform JM-B CYT-2 of Receptor tyrosine-protein kinase erbB-4;Isoform JM-A CYT-2 of Receptor tyrosine-protein kinase erbB-4	ERBB4_MOUSE	inf	0.0620465	0.145715	8.72137e-06
Q68FM6	Elfn2	Protein phosphatase 1 regulatory subunit 29	PPR29_MOUSE	inf	0.0621224	0.145715	2.24459e-05
Q6ZQ29-2	Taok2	Isoform 2 of Serine/threonine-protein kinase TAO2	TAOK2_MOUSE	inf	0.0621458	0.145715	8.92377e-06
Q9JKC8	Ap3m1	AP-3 complex subunit mu-1	AP3M1_MOUSE	inf	0.0621579	0.145715	6.80814e-06
P59326	Ythdf1	YTH domain-containing family protein 1	YTHD1_MOUSE	inf	0.0621827	0.145715	4.54436e-06
Q922H1;Q922H1-2	Prmt3	Protein arginine N-methyltransferase 3;Isoform 2 of Protein arginine N-methyltransferase 3	ANM3_MOUSE	inf	0.0622668	0.145715	6.40745e-06
Q8BUL6;Q8BUL6-2	Plekha1	Pleckstrin homology domain-containing family A member 1;Isoform 2 of Pleckstrin homology domain-containing family A member 1	PKHA1_MOUSE	1.89208	0.0622853	0.145715	2.92623e-05
Q64310	Surf4	Surfeit locus protein 4	SURF4_MOUSE	1.8565	0.0622927	0.145715	3.78853e-05
Q9WV92-7	Epb41l3	Isoform 7 of Band 4.1-like protein 3	E41L3_MOUSE	inf	0.0622951	0.145715	2.18889e-05
P60879-2	Snap25	Isoform 2 of Synaptosomal-associated protein 25	SNP25_MOUSE	inf	0.0623046	0.145715	2.85751e-06
Q8VDN4	Ccdc92	Coiled-coil domain-containing protein 92	CCD92_MOUSE	inf	0.0623704	0.145715	3.68703e-06
Q8QZV4	Stk32c	Serine/threonine-protein kinase 32C	ST32C_MOUSE	inf	0.0624478	0.145715	5.89876e-06
Q8BYI9	Tnr	Tenascin-R	TENR_MOUSE	1.69635	0.0625391	0.145715	7.39664e-05
P54728	Rad23b	UV excision repair protein RAD23 homolog B	RD23B_MOUSE	2.29713	0.062563	0.145715	4.73804e-05
Q80XQ2	Tbc1d5	TBC1 domain family member 5	TBCD5_MOUSE	inf	0.0626479	0.145715	3.20739e-06
Q8VBT0	Tmx1	Thioredoxin-related transmembrane protein 1	TMX1_MOUSE	inf	0.0627056	0.145715	1.12139e-05
Q80SY6;Q80SY6-2;Q80SY6-4	Adal	Adenosine deaminase-like protein;Isoform 2 of Adenosine deaminase-like protein;Isoform 4 of Adenosine deaminase-like protein	ADAL_MOUSE	inf	0.0627176	0.145715	8.20212e-06
P01831	Thy1	Thy-1 membrane glycoprotein	THY1_MOUSE	1.2785	0.0627322	0.145715	4.91821e-05
Q8R050;Q8R050-2	Gspt1	Eukaryotic peptide chain release factor GTP-binding subunit ERF3A;Isoform 2 of Eukaryotic peptide chain release factor GTP-binding subunit ERF3A	ERF3A_MOUSE	2.31317	0.0627456	0.145715	2.46737e-05
Q60673	Ptprn	Receptor-type tyrosine-protein phosphatase-like N	PTPRN_MOUSE	inf	0.0627691	0.145715	4.83618e-06
Q99P58	Rab27b	Ras-related protein Rab-27B	RB27B_MOUSE	inf	0.0628094	0.145715	6.90653e-06
Q9D0M5	Dynll2	Dynein light chain 2, cytoplasmic	DYL2_MOUSE	1.10469	0.0628113	0.145715	0.000190779
P46935	Nedd4	E3 ubiquitin-protein ligase NEDD4	NEDD4_MOUSE	inf	0.0629146	0.145715	6.33267e-06
D3YZU1	Shank1	SH3 and multiple ankyrin repeat domains protein 1	SHAN1_MOUSE	inf	0.0629203	0.145715	7.62101e-06
P49722	Psma2	Proteasome subunit alpha type-2	PSA2_MOUSE	2.72434	0.0629292	0.145715	9.11441e-05
P35293	Rab18	Ras-related protein Rab-18	RAB18_MOUSE	inf	0.0630895	0.145715	7.00389e-06
Q9D967	Mdp1	Magnesium-dependent phosphatase 1	MGDP1_MOUSE	inf	0.0631149	0.145715	9.72525e-06
Q64516;Q64516-1;Q64516-2	Gk	Glycerol kinase;Isoform 1 of Glycerol kinase;Isoform 2 of Glycerol kinase	GLPK_MOUSE	inf	0.0631172	0.145715	1.43701e-05
Q99K46	Usp11	Ubiquitin carboxyl-terminal hydrolase 11	UBP11_MOUSE	inf	0.0631749	0.145715	7.02162e-06
Q920Q6;Q920Q6-2;Q920Q6-3	Msi2	RNA-binding protein Musashi homolog 2;Isoform 2 of RNA-binding protein Musashi homolog 2;Isoform 3 of RNA-binding protein Musashi homolog 2	MSI2H_MOUSE	inf	0.0631892	0.145715	6.40382e-06
Q9Z0L0	Tpbg	Trophoblast glycoprotein	TPBG_MOUSE	inf	0.0632705	0.145715	4.67178e-06
P97300	Nptn	Neuroplastin	NPTN_MOUSE	inf	0.0632938	0.145715	9.87914e-06
Q7TN99;Q7TN99-2;Q7TN99-3;Q7TN99-4	Cpeb3	Cytoplasmic polyadenylation element-binding protein 3;Isoform 2 of Cytoplasmic polyadenylation element-binding protein 3;Isoform 3 of Cytoplasmic polyadenylation element-binding protein 3;Isoform 4 of Cytoplasmic polyadenylation element-binding protein 3	CPEB3_MOUSE	inf	0.0633372	0.145715	6.55085e-06
P62305	Snrpe	Small nuclear ribonucleoprotein E	RUXE_MOUSE	inf	0.0633481	0.145715	4.61959e-06
Q7M732	Rtl1	Retrotransposon-like protein 1	RTL1_MOUSE	inf	0.0633767	0.145715	5.40948e-06
Q62283	Tspan7	Tetraspanin-7	TSN7_MOUSE	2.78656	0.06338	0.145715	2.47623e-05
P70318	Tial1	Nucleolysin TIAR	TIAR_MOUSE	inf	0.0634011	0.145715	3.88483e-05
Q8BKX1;Q8BKX1-2;Q8BKX1-3;Q8BKX1-4	Baiap2	Brain-specific angiogenesis inhibitor 1-associated protein 2;Isoform 2 of Brain-specific angiogenesis inhibitor 1-associated protein 2;Isoform 3 of Brain-specific angiogenesis inhibitor 1-associated protein 2;Isoform 4 of Brain-specific angiogenesis inhibitor 1-associated protein 2	BAIP2_MOUSE	inf	0.0634031	0.145715	3.14061e-06
O88444	Adcy1	Adenylate cyclase type 1	ADCY1_MOUSE	inf	0.0634352	0.145715	6.28545e-06
O88544	Cops4	COP9 signalosome complex subunit 4	CSN4_MOUSE	inf	0.0634352	0.145715	6.39654e-06
O89086	Rbm3	RNA-binding protein 3	RBM3_MOUSE	inf	0.0636723	0.145812	8.44965e-06
Q8VDN2	Atp1a1	Sodium/potassium-transporting ATPase subunit alpha-1	AT1A1_MOUSE	0.96806	0.0636984	0.145812	0.0013056
P97371	Psme1	Proteasome activator complex subunit 1	PSME1_MOUSE	0.905693	0.063706	0.145812	0.000109145
Q9D061	Acbd6	Acyl-CoA-binding domain-containing protein 6	ACBD6_MOUSE	inf	0.0637542	0.145812	5.44551e-06
Q9QY01	Ulk2	Serine/threonine-protein kinase ULK2	ULK2_MOUSE	inf	0.0637829	0.145812	4.02665e-06
O88487	Dync1i2	Cytoplasmic dynein 1 intermediate chain 2	DC1I2_MOUSE	inf	0.0638065	0.145812	7.01253e-06
Q3V3Q7	Pacs2	Phosphofurin acidic cluster sorting protein 2	PACS2_MOUSE	inf	0.0639624	0.146043	5.22112e-06
Q3UTH8;Q3UTH8-2;Q3UTH8-3;Q3UTH8-4	Arhgef9	Rho guanine nucleotide exchange factor 9;Isoform 2 of Rho guanine nucleotide exchange factor 9;Isoform 3 of Rho guanine nucleotide exchange factor 9;Isoform 4 of Rho guanine nucleotide exchange factor 9	ARHG9_MOUSE	inf	0.0641423	0.146328	1.47268e-05
Q9CPV4	Glod4	Glyoxalase domain-containing protein 4	GLOD4_MOUSE	2.2402	0.0643804	0.146386	1.83541e-05
Q91ZM2;Q91ZM2-2;Q91ZM2-3;Q91ZM2-4;Q91ZM2-6	Sh2b1	SH2B adapter protein 1;Isoform 2 of SH2B adapter protein 1;Isoform 3 of SH2B adapter protein 1;Isoform 4 of SH2B adapter protein 1;Isoform 6 of SH2B adapter protein 1	SH2B1_MOUSE	inf	0.064407	0.146386	5.13639e-06
O08576;O08576-2;O08576-3;O08576-4	Rundc3a	RUN domain-containing protein 3A;Isoform 2 of RUN domain-containing protein 3A;Isoform 3 of RUN domain-containing protein 3A;Isoform 4 of RUN domain-containing protein 3A	RUN3A_MOUSE	inf	0.0644433	0.146386	1.14807e-05
Q80TL0	Ppm1e	Protein phosphatase 1E	PPM1E_MOUSE	inf	0.0645076	0.146386	1.12716e-05
Q9Z1S8	Gab2	GRB2-associated-binding protein 2	GAB2_MOUSE	inf	0.064564	0.146386	4.50094e-06
Q8BGQ1	Vipas39	Spermatogenesis-defective protein 39 homolog	SPE39_MOUSE	inf	0.0646357	0.146386	5.29685e-06
Q8BYB9	Poglut1	Protein O-glucosyltransferase 1	PGLT1_MOUSE	inf	0.0646476	0.146386	3.05449e-05
Q3TDQ1	Stt3b	Dolichyl-diphosphooligosaccharide--protein glycosyltransferase subunit STT3B	STT3B_MOUSE	1.80618	0.0646493	0.146386	2.22955e-05
Q7TMY8;Q7TMY8-3;Q7TMY8-4	Huwe1	E3 ubiquitin-protein ligase HUWE1;Isoform 3 of E3 ubiquitin-protein ligase HUWE1;Isoform 4 of E3 ubiquitin-protein ligase HUWE1	HUWE1_MOUSE	inf	0.0646926	0.146386	5.12244e-06
Q60996;Q60996-2;Q60996-3;Q60996-4	Ppp2r5c	Serine/threonine-protein phosphatase 2A 56 kDa regulatory subunit gamma isoform;Isoform 1 of Serine/threonine-protein phosphatase 2A 56 kDa regulatory subunit gamma isoform;Isoform 3 of Serine/threonine-protein phosphatase 2A 56 kDa regulatory subunit gamma isoform;Isoform 4 of Serine/threonine-protein phosphatase 2A 56 kDa regulatory subunit gamma isoform	2A5G_MOUSE	3.04689	0.0647182	0.146386	8.67038e-05
Q62470;Q62470-2;Q62470-3	Itga3	Integrin alpha-3;Isoform 2 of Integrin alpha-3;Isoform 3 of Integrin alpha-3	ITA3_MOUSE	inf	0.0648797	0.146627	7.62836e-06
Q8C8T7	Elfn1	Protein ELFN1	ELFN1_MOUSE	inf	0.0650137	0.146797	7.25617e-06
Q8BIQ5;Q8BIQ5-2	Cstf2	Cleavage stimulation factor subunit 2;Isoform 2 of Cleavage stimulation factor subunit 2	CSTF2_MOUSE	inf	0.0650651	0.146797	4.53534e-06
P62835	Rap1a	Ras-related protein Rap-1A	RAP1A_MOUSE	2.49636	0.0651372	0.146798	5.25989e-05
Q8VE11;Q8VE11-2	Mtmr6	Myotubularin-related protein 6;Isoform 2 of Myotubularin-related protein 6	MTMR6_MOUSE	inf	0.0652028	0.146798	3.04477e-06
Q8R180	Ero1a	ERO1-like protein alpha	ERO1A_MOUSE	inf	0.0652315	0.146798	5.36963e-06
Q7TT37	Elp1	Elongator complex protein 1	ELP1_MOUSE	inf	0.0653568	0.146806	6.62923e-06
Q924N4	Slc12a6	Solute carrier family 12 member 6	S12A6_MOUSE	inf	0.0653777	0.146806	6.22634e-06
P47754	Capza2	F-actin-capping protein subunit alpha-2	CAZA2_MOUSE	2.62319	0.0654223	0.146806	7.40262e-05
Q6ZPU9;Q6ZPU9-3	Kifbp	KIF-binding protein;Isoform 3 of KIF-binding protein	KBP_MOUSE	inf	0.0654556	0.146806	5.05941e-06
P50405	Sftpb	Pulmonary surfactant-associated protein B	PSPB_MOUSE	1.79063	0.0655785	0.146958	7.33134e-05
Q5SQX6	Cyfip2	Cytoplasmic FMR1-interacting protein 2	CYFP2_MOUSE	1.26687	0.0657851	0.147205	5.97076e-05
Q9D906	Atg7	Ubiquitin-like modifier-activating enzyme ATG7	ATG7_MOUSE	inf	0.0657994	0.147205	4.4902e-06
Q9DCT8	Crip2	Cysteine-rich protein 2	CRIP2_MOUSE	2.46258	0.0659448	0.147286	7.02055e-05
Q7TPM6	Fsd1	Fibronectin type III and SPRY domain-containing protein 1	FSD1_MOUSE	inf	0.0659793	0.147286	6.47067e-06
Q6PDI6	Mindy2	Ubiquitin carboxyl-terminal hydrolase MINDY-2	MINY2_MOUSE	inf	0.0660019	0.147286	3.3034e-06
Q68FF6	Git1	ARF GTPase-activating protein GIT1	GIT1_MOUSE	1.82762	0.0662733	0.147678	2.17965e-05
Q66L44	Cbarp	Voltage-dependent calcium channel beta subunit-associated regulatory protein	CBARP_MOUSE	inf	0.0663564	0.147678	3.61286e-05
P70441	Slc9a3r1	Na(+)/H(+) exchange regulatory cofactor NHE-RF1	NHRF1_MOUSE	inf	0.0664047	0.147678	9.75642e-06
Q9R0P3	Esd	S-formylglutathione hydrolase	ESTD_MOUSE	inf	0.066441	0.147678	1.11446e-05
P63328	Ppp3ca	Serine/threonine-protein phosphatase 2B catalytic subunit alpha isoform	PP2BA_MOUSE	1.02126	0.0664552	0.147678	0.000229604
O08788;O08788-2	Dctn1	Dynactin subunit 1;Isoform 2 of Dynactin subunit 1	DCTN1_MOUSE	inf	0.0666037	0.147698	5.86732e-06
Q60668;Q60668-3	Hnrnpd	Heterogeneous nuclear ribonucleoprotein D0;Isoform 3 of Heterogeneous nuclear ribonucleoprotein D0	HNRPD_MOUSE	2.25045	0.0666569	0.147698	3.38259e-05
A2AN08;A2AN08-3;A2AN08-5	Ubr4	E3 ubiquitin-protein ligase UBR4;Isoform 3 of E3 ubiquitin-protein ligase UBR4;Isoform 5 of E3 ubiquitin-protein ligase UBR4	UBR4_MOUSE	inf	0.0666585	0.147698	4.27339e-06
P50153	Gng4	Guanine nucleotide-binding protein G(I)/G(S)/G(O) subunit gamma-4	GBG4_MOUSE	inf	0.0667399	0.147698	1.42041e-05
Q91XL9;Q91XL9-2;Q91XL9-3	Osbpl1a	Oxysterol-binding protein-related protein 1;Isoform 2 of Oxysterol-binding protein-related protein 1;Isoform 3 of Oxysterol-binding protein-related protein 1	OSBL1_MOUSE	1.81147	0.0667869	0.147698	1.01813e-05
Q3UHD2	Gfod1	Glucose-fructose oxidoreductase domain-containing protein 1	GFOD1_MOUSE	inf	0.0667971	0.147698	6.16123e-06
Q9EPR4	Slc23a2	Solute carrier family 23 member 2	S23A2_MOUSE	inf	0.0669006	0.147804	1.23642e-05
G3XA57;G3XA57-2	Rab11fip2	Rab11 family-interacting protein 2;Isoform 2 of Rab11 family-interacting protein 2	RFIP2_MOUSE	inf	0.0672083	0.14836	6.88353e-06
P20108	Prdx3	Thioredoxin-dependent peroxide reductase, mitochondrial	PRDX3_MOUSE	0.716337	0.0674071	0.148596	3.27016e-05
Q9Z2A5;Q9Z2A5-2	Ate1	Arginyl-tRNA--protein transferase 1;Isoform ATE1-2 of Arginyl-tRNA--protein transferase 1	ATE1_MOUSE	inf	0.0674268	0.148596	5.51131e-06
P28740-2	Kif2a	Isoform 2 of Kinesin-like protein KIF2A	KIF2A_MOUSE	1.54393	0.0675503	0.148745	7.58022e-05
P09528	Fth1	Ferritin heavy chain	FRIH_MOUSE	1.17776	0.0684371	0.150573	3.31361e-05
O35551;O35551-3;O35551-5	Rabep1	Rab GTPase-binding effector protein 1;Isoform 3 of Rab GTPase-binding effector protein 1;Isoform 5 of Rab GTPase-binding effector protein 1	RABE1_MOUSE	inf	0.0685858	0.150772	5.22687e-06
Q9D1P4	Chordc1	Cysteine and histidine-rich domain-containing protein 1	CHRD1_MOUSE	inf	0.0686409	0.150772	6.47557e-06
Q8C1B1;Q8C1B1-2	Camsap2	Calmodulin-regulated spectrin-associated protein 2;Isoform 2 of Calmodulin-regulated spectrin-associated protein 2	CAMP2_MOUSE	inf	0.0687881	0.150971	3.86684e-06
Q2PFD7;Q2PFD7-2	Psd3	PH and SEC7 domain-containing protein 3;Isoform 2 of PH and SEC7 domain-containing protein 3	PSD3_MOUSE	1.57084	0.0690947	0.151518	0.000161293
P22892	Ap1g1	AP-1 complex subunit gamma-1	AP1G1_MOUSE	2.20447	0.0692167	0.151661	1.99856e-05
P51859	Hdgf	Hepatoma-derived growth factor	HDGF_MOUSE	1.71978	0.069277	0.151668	3.51529e-05
Q99LG2	Tnpo2	Transportin-2	TNPO2_MOUSE	inf	0.0693892	0.151789	3.59119e-06
P62311	Lsm3	U6 snRNA-associated Sm-like protein LSm3	LSM3_MOUSE	1.70283	0.0696245	0.151911	2.30579e-05
P21107	Tpm3	Tropomyosin alpha-3 chain	TPM3_MOUSE	1.64887	0.0696435	0.151911	0.000818655
Q8C129	Lnpep	Leucyl-cystinyl aminopeptidase	LCAP_MOUSE	inf	0.0698148	0.151911	6.24291e-06
Q60749	Khdrbs1	KH domain-containing, RNA-binding, signal transduction-associated protein 1	KHDR1_MOUSE	inf	0.0698199	0.151911	5.35399e-06
Q99M51	Nck1	Cytoplasmic protein NCK1	NCK1_MOUSE	inf	0.0698204	0.151911	3.05527e-06
Q9JMH6;Q9JMH6-2	Txnrd1	Thioredoxin reductase 1, cytoplasmic;Isoform 2 of Thioredoxin reductase 1, cytoplasmic	TRXR1_MOUSE	0.728507	0.0698233	0.151911	4.85163e-05
Q62420	Sh3gl2	Endophilin-A1	SH3G2_MOUSE	2.19024	0.0698603	0.151911	3.03714e-05
P21107-2	Tpm3	Isoform 2 of Tropomyosin alpha-3 chain	TPM3_MOUSE	1.98611	0.06997	0.151911	0.000296925
P62141	Ppp1cb	Serine/threonine-protein phosphatase PP1-beta catalytic subunit	PP1B_MOUSE	2.26773	0.0699926	0.151911	4.64959e-05
Q61316	Hspa4	Heat shock 70 kDa protein 4	HSP74_MOUSE	2.36253	0.0700159	0.151911	3.55517e-05
P70349	Hint1	Histidine triad nucleotide-binding protein 1	HINT1_MOUSE	2.56039	0.0702607	0.152317	6.81521e-05
Q8BHH2	Rab9b	Ras-related protein Rab-9B	RAB9B_MOUSE	inf	0.0704545	0.152597	5.07091e-06
Q9QUH0	Glrx	Glutaredoxin-1	GLRX1_MOUSE	2.31573	0.0705044	0.152597	3.32879e-05
Q91W89	Man2c1	Alpha-mannosidase 2C1	MA2C1_MOUSE	inf	0.0706183	0.152719	1.10409e-05
Q62523	Zyx	Zyxin	ZYX_MOUSE	inf	0.070735	0.152847	1.7215e-05
Q3U2P1	Sec24a	Protein transport protein Sec24A	SC24A_MOUSE	inf	0.0709412	0.153168	1.65153e-05
P52760	Rida	2-iminobutanoate/2-iminopropanoate deaminase	RIDA_MOUSE	2.07943	0.0713052	0.15374	1.2838e-05
P19123	Tnnc1	Troponin C, slow skeletal and cardiac muscles	TNNC1_MOUSE	2.40673	0.0713216	0.15374	6.99074e-05
Q8CIG8	Prmt5	Protein arginine N-methyltransferase 5	ANM5_MOUSE	inf	0.0716093	0.154235	1.84319e-05
Q6A0A9	FAM120A	Constitutive coactivator of PPAR-gamma-like protein 1	F120A_MOUSE	inf	0.0717025	0.154311	1.81064e-06
Q3TCJ1	Abraxas2	BRISC complex subunit Abraxas 2	ABRX2_MOUSE	inf	0.0717678	0.154327	3.86658e-06
Q3UH60	Dip2b	Disco-interacting protein 2 homolog B	DIP2B_MOUSE	inf	0.0722485	0.155235	6.09091e-06
P58281;P58281-2	Opa1	Dynamin-like 120 kDa protein, mitochondrial;Isoform 2 of Dynamin-like 120 kDa protein, mitochondrial	OPA1_MOUSE	1.81153	0.0725339	0.155723	1.8181e-05
O35381	Anp32a	Acidic leucine-rich nuclear phosphoprotein 32 family member A	AN32A_MOUSE	1.89296	0.0727446	0.156049	6.04132e-05
Q60960	Kpna1	Importin subunit alpha-5	IMA5_MOUSE	inf	0.0729003	0.156257	7.33081e-06
Q9Z2V5	Hdac6	Histone deacetylase 6	HDAC6_MOUSE	inf	0.0730232	0.156394	3.8383e-06
Q6PDM2;Q6PDM2-2;Q6PDM2-3	Srsf1	Serine/arginine-rich splicing factor 1;Isoform 2 of Serine/arginine-rich splicing factor 1;Isoform 3 of Serine/arginine-rich splicing factor 1	SRSF1_MOUSE	1.5711	0.0732476	0.156749	4.3463e-05
P61358	Rpl27	60S ribosomal protein L27	RL27_MOUSE	0.806928	0.0733195	0.156777	9.61684e-05
P62911	Rpl32	60S ribosomal protein L32	RL32_MOUSE	0.842369	0.0733952	0.156812	0.000157794
P11881;P11881-2;P11881-3;P11881-4;P11881-5;P11881-6;P11881-7;P11881-8	Itpr1	Inositol 1,4,5-trisphosphate receptor type 1;Isoform 2 of Inositol 1,4,5-trisphosphate receptor type 1;Isoform 3 of Inositol 1,4,5-trisphosphate receptor type 1;Isoform 4 of Inositol 1,4,5-trisphosphate receptor type 1;Isoform 5 of Inositol 1,4,5-trisphosphate receptor type 1;Isoform 6 of Inositol 1,4,5-trisphosphate receptor type 1;Isoform 7 of Inositol 1,4,5-trisphosphate receptor type 1;Isofor…	ITPR1_MOUSE	inf	0.0734776	0.156862	1.71507e-05
Q9CXJ4	Abcb8	Mitochondrial potassium channel ATP-binding subunit	MITOS_MOUSE	1.56306	0.0737174	0.157248	3.69787e-05
P68404-2	Prkcb	Isoform Beta-II of Protein kinase C beta type	KPCB_MOUSE	1.38291	0.0738695	0.157446	8.15304e-05
B1AY13	Usp24	Ubiquitin carboxyl-terminal hydrolase 24	UBP24_MOUSE	inf	0.074015	0.15763	4.86789e-06
Q9CR68	Uqcrfs1	Cytochrome b-c1 complex subunit Rieske, mitochondrial	UCRI_MOUSE	0.54795	0.0745235	0.158535	3.86796e-05
P07758;P22599;Q00896;Q00898	Serpina1a;Serpina1b;Serpina1c;Serpina1e	Alpha-1-antitrypsin 1-1;Alpha-1-antitrypsin 1-2;Alpha-1-antitrypsin 1-3;Alpha-1-antitrypsin 1-5	A1AT1_MOUSE;A1AT2_MOUSE;A1AT3_MOUSE;A1AT5_MOUSE	1.60322	0.0745593	0.158535	3.22069e-05
P61750	Arf4	ADP-ribosylation factor 4	ARF4_MOUSE	1.68114	0.0748519	0.15903	1.86074e-05
P31648	Slc6a1	Sodium- and chloride-dependent GABA transporter 1	SC6A1_MOUSE	1.39553	0.0752733	0.15969	6.59698e-05
P55012	Slc12a2	Solute carrier family 12 member 2	S12A2_MOUSE	2.10833	0.0752826	0.15969	2.08573e-05
Q9QWY8;Q9QWY8-2;Q9QWY8-3;Q9QWY8-4	Asap1	Arf-GAP with SH3 domain, ANK repeat and PH domain-containing protein 1;Isoform 2 of Arf-GAP with SH3 domain, ANK repeat and PH domain-containing protein 1;Isoform 3 of Arf-GAP with SH3 domain, ANK repeat and PH domain-containing protein 1;Isoform 4 of Arf-GAP with SH3 domain, ANK repeat and PH domain-containing protein 1	ASAP1_MOUSE	inf	0.0755167	0.160059	3.96277e-06
P47964	Rpl36	60S ribosomal protein L36	RL36_MOUSE	1.05429	0.0756742	0.160166	0.000302163
P58771	Tpm1	Tropomyosin alpha-1 chain	TPM1_MOUSE	2.00087	0.0756877	0.160166	0.00220819
Q3UHL1	Camkv	CaM kinase-like vesicle-associated protein	CAMKV_MOUSE	1.58175	0.0758865	0.16046	3.96706e-05
Q9D8S3	Arfgap3	ADP-ribosylation factor GTPase-activating protein 3	ARFG3_MOUSE	inf	0.0760847	0.160751	3.93004e-06
P06745	Gpi	Glucose-6-phosphate isomerase	G6PI_MOUSE	0.796126	0.0761636	0.16079	7.66165e-05
Q52KF3;Q52KF3-2;Q52KF3-3	Spire1	Protein spire homolog 1;Isoform 2 of Protein spire homolog 1;Isoform 3 of Protein spire homolog 1	SPIR1_MOUSE	inf	0.0766525	0.161682	3.70945e-06
Q91WC3	Acsl6	Long-chain-fatty-acid--CoA ligase 6	ACSL6_MOUSE	0.867611	0.0767077	0.161682	4.07263e-05
P54227	Stmn1	Stathmin	STMN1_MOUSE	1.85107	0.0769156	0.161912	0.00025203
Q148V7-2	Relch	Isoform 2 of RAB11-binding protein RELCH	RELCH_MOUSE	inf	0.0769387	0.161912	3.29453e-06
Q9WVK4	Ehd1	EH domain-containing protein 1	EHD1_MOUSE	inf	0.0770998	0.162123	5.9002e-06
Q91V14-2	Slc12a5	Isoform 2 of Solute carrier family 12 member 5	S12A5_MOUSE	1.64118	0.0772332	0.162147	8.63654e-05
Q8BGH2	Samm50	Sorting and assembly machinery component 50 homolog	SAM50_MOUSE	-1.00461	0.0772334	0.162147	0.000118926
P28663	Napb	Beta-soluble NSF attachment protein	SNAB_MOUSE	0.766679	0.0773538	0.162272	3.39505e-05
O88811	Stam2	Signal transducing adapter molecule 2	STAM2_MOUSE	inf	0.0776532	0.162689	3.94302e-06
Q9R0Y5;Q9R0Y5-2	Ak1	Adenylate kinase isoenzyme 1;Isoform 2 of Adenylate kinase isoenzyme 1	KAD1_MOUSE	1.38805	0.0776747	0.162689	6.78162e-05
P09542	Myl3	Myosin light chain 3	MYL3_MOUSE	1.8531	0.0779064	0.162925	0.00164739
P97772	Grm1	Metabotropic glutamate receptor 1	GRM1_MOUSE	inf	0.0779101	0.162925	6.61953e-06
Q61335	Bcap31	B-cell receptor-associated protein 31	BAP31_MOUSE	1.81179	0.0783324	0.16368	9.05538e-06
Q91VE0	Slc27a4	Long-chain fatty acid transport protein 4	S27A4_MOUSE	inf	0.0785852	0.164079	7.46957e-06
Q8VE33	Gdap1l1	Ganglioside-induced differentiation-associated protein 1-like 1	GD1L1_MOUSE	1.32721	0.0786981	0.164186	4.86264e-05
P43006	Slc1a2	Excitatory amino acid transporter 2	EAA2_MOUSE	0.877926	0.0792453	0.165198	0.000189162
Q9D328	Tmem35a	Transmembrane protein 35A	TM35A_MOUSE	1.4847	0.0793396	0.165265	5.11188e-05
Q8R2R9	Ap3m2	AP-3 complex subunit mu-2	AP3M2_MOUSE	inf	0.0798762	0.166132	2.51887e-06
P84104;P84104-2	Srsf3	Serine/arginine-rich splicing factor 3;Isoform Short of Serine/arginine-rich splicing factor 3	SRSF3_MOUSE	1.47919	0.0799166	0.166132	1.80326e-05
P48542;P48542-2	Kcnj6	G protein-activated inward rectifier potassium channel 2;Isoform GIRK2-1 of G protein-activated inward rectifier potassium channel 2	KCNJ6_MOUSE	inf	0.0799892	0.166132	4.74248e-06
P19096	Fasn	Fatty acid synthase	FAS_MOUSE	1.09459	0.0800059	0.166132	5.38459e-05
F6SEU4	Syngap1	Ras/Rap GTPase-activating protein SynGAP	SYGP1_MOUSE	2.46673	0.0801047	0.166208	2.83283e-05
Q9Z0V1	Kcnd3	Potassium voltage-gated channel subfamily D member 3	KCND3_MOUSE	2.25746	0.0803099	0.166504	2.51289e-05
P62137	Ppp1ca	Serine/threonine-protein phosphatase PP1-alpha catalytic subunit	PP1A_MOUSE	2.04682	0.0809216	0.167641	1.98021e-05
Q8K4Q0	Rptor	Regulatory-associated protein of mTOR	RPTOR_MOUSE	inf	0.0810021	0.167678	1.49761e-05
P05201	Got1	Aspartate aminotransferase, cytoplasmic	AATC_MOUSE	0.691524	0.0817472	0.169088	0.000184019
Q9EPL8	Ipo7	Importin-7	IPO7_MOUSE	inf	0.081926	0.169327	9.33825e-06
Q99LX5	Mmtag2	Multiple myeloma tumor-associated protein 2 homolog	MMTA2_MOUSE	1.89585	0.0824439	0.170172	1.21163e-05
Q8BWS5	Gprin3	G protein-regulated inducer of neurite outgrowth 3	GRIN3_MOUSE	inf	0.082463	0.170172	3.37713e-05
Q9JLQ0	Cd2ap	CD2-associated protein	CD2AP_MOUSE	inf	0.0831467	0.17145	2.04093e-05
Q01149	Col1a2	Collagen alpha-2(I) chain	CO1A2_MOUSE	1.40321	0.0833959	0.171831	0.00020046
P80314	Cct2	T-complex protein 1 subunit beta	TCPB_MOUSE	2.25541	0.0835647	0.171964	4.46883e-05
P97355	Sms	Spermine synthase	SPSY_MOUSE	inf	0.08359	0.171964	2.10296e-05
Q8K183	Pdxk	Pyridoxal kinase	PDXK_MOUSE	0.816967	0.0838145	0.172293	0.000229238
Q9D7G0	Prps1	Ribose-phosphate pyrophosphokinase 1	PRPS1_MOUSE	2.03464	0.084315	0.173085	1.94859e-05
Q640R3	Hepacam	Hepatocyte cell adhesion molecule	HECAM_MOUSE	1.89136	0.0843301	0.173085	1.34448e-05
Q6ZQ38	Cand1	Cullin-associated NEDD8-dissociated protein 1	CAND1_MOUSE	1.37705	0.0847384	0.173789	6.62135e-05
Q6PIE5	Atp1a2	Sodium/potassium-transporting ATPase subunit alpha-2	AT1A2_MOUSE	1.09583	0.0850928	0.174381	0.00102468
Q9D6J5	Ndufb8	NADH dehydrogenase [ubiquinone] 1 beta subcomplex subunit 8, mitochondrial	NDUB8_MOUSE	0.735168	0.0853317	0.174736	3.44906e-05
Q8BGS2;Q8BGS2-2	Bola2	BolA-like protein 2;Isoform 2 of BolA-like protein 2	BOLA2_MOUSE	inf	0.0856371	0.174975	1.88466e-06
Q9D710	Tmx2	Thioredoxin-related transmembrane protein 2	TMX2_MOUSE	1.46988	0.0856379	0.174975	1.1515e-05
Q6IRU2	Tpm4	Tropomyosin alpha-4 chain	TPM4_MOUSE	2.07551	0.0856458	0.174975	0.000210193
Q9WUM4	Coro1c	Coronin-1C	COR1C_MOUSE	0.960699	0.0860907	0.175706	3.44441e-05
Q3UHX2	Pdap1	28 kDa heat- and acid-stable phosphoprotein	HAP28_MOUSE	2.01207	0.0861355	0.175706	3.6615e-05
P63158	Hmgb1	High mobility group protein B1	HMGB1_MOUSE	1.43666	0.0863142	0.175935	2.22704e-05
P61205;P84078	Arf3;Arf1	ADP-ribosylation factor 3;ADP-ribosylation factor 1	ARF3_MOUSE;ARF1_MOUSE	2.2099	0.0865477	0.176222	0.000105332
P12960	Cntn1	Contactin-1	CNTN1_MOUSE	1.21541	0.086587	0.176222	5.1256e-05
Q3UYC0	Ppm1h	Protein phosphatase 1H	PPM1H_MOUSE	inf	0.0867502	0.176373	4.08829e-06
P56395	Cyb5a	Cytochrome b5	CYB5_MOUSE	1.29307	0.0867942	0.176373	3.83166e-05
P97825	Jpt1	Jupiter microtubule associated homolog 1	JUPI1_MOUSE	1.93951	0.0872009	0.176957	2.01241e-05
P58771-2	Tpm1	Isoform 2 of Tropomyosin alpha-1 chain	TPM1_MOUSE	1.83579	0.0872274	0.176957	0.000108943
P10751	Zfp11	Zinc finger protein 11	ZFP11_MOUSE	2.86638	0.0872811	0.176957	0.000310958
P70663	Sparcl1	SPARC-like protein 1	SPRL1_MOUSE	1.42637	0.0874886	0.177135	1.30314e-05
O88569;O88569-2;O88569-3	Hnrnpa2b1	Heterogeneous nuclear ribonucleoproteins A2/B1;Isoform 2 of Heterogeneous nuclear ribonucleoproteins A2/B1;Isoform 3 of Heterogeneous nuclear ribonucleoproteins A2/B1	ROA2_MOUSE	2.15965	0.0875018	0.177135	4.22741e-05
P58389	Ptpa	Serine/threonine-protein phosphatase 2A activator	PTPA_MOUSE	1.95439	0.0884228	0.178863	2.18591e-05
P0C7L0;P0C7L0-2	Wipf3	WAS/WASL-interacting protein family member 3;Isoform 2 of WAS/WASL-interacting protein family member 3	WIPF3_MOUSE	inf	0.0892622	0.180383	7.64117e-06
O54774	Ap3d1	AP-3 complex subunit delta-1	AP3D1_MOUSE	1.03417	0.0893752	0.180383	2.98571e-05
Q922S4	Pde2a	cGMP-dependent 3',5'-cyclic phosphodiesterase	PDE2A_MOUSE	1.23706	0.0893779	0.180383	2.07341e-05
Q99LT0	Dpy30	Protein dpy-30 homolog	DPY30_MOUSE	1.08688	0.089969	0.181328	6.40103e-05
P62774	Mtpn	Myotrophin	MTPN_MOUSE	1.869	0.0899821	0.181328	2.55529e-05
Q4V9Z5-2;Q4V9Z5-3	Sez6l2	Isoform 2 of Seizure 6-like protein 2;Isoform 3 of Seizure 6-like protein 2	SE6L2_MOUSE	4.24596	0.0900512	0.181329	1.47478e-05
Q9DB41;Q9DB41-2	Slc25a18	Mitochondrial glutamate carrier 2;Isoform 2 of Mitochondrial glutamate carrier 2	GHC2_MOUSE	0.846263	0.0902708	0.181634	6.63696e-05
P11983	Tcp1	T-complex protein 1 subunit alpha	TCPA_MOUSE	1.73341	0.0907798	0.18252	4.93693e-05
Q8K0C9	Gmds	GDP-mannose 4,6 dehydratase	GMDS_MOUSE	1.08273	0.0911711	0.183054	4.67072e-05
Q61885	Mog	Myelin-oligodendrocyte glycoprotein	MOG_MOUSE	0.676563	0.0912132	0.183054	0.000238018
Q9QZ88	Vps29	Vacuolar protein sorting-associated protein 29	VPS29_MOUSE	2.20358	0.0912583	0.183054	5.29295e-05
Q8BIF2;Q8BIF2-2;Q8BIF2-4;Q8BIF2-5;Q8BP71;Q8BP71-2;Q8BP71-3;Q8BP71-5;Q8BP71-6;Q8BP71-7;Q8BP71-8;Q9JJ43;Q9JJ43-2;Q9JJ43-3;Q9JJ43-4;Q9JJ43-5;Q9JJ43-6	Rbfox3;Rbfox3;Rbfox3;Rbfox3;Rbfox2;Rbfox2;Rbfox2;Rbfox2;Rbfox2;Rbfox2;Rbfox2;Rbfox1;Rbfox1;Rbfox1;Rbfox1;Rbfox1;Rbfox1	RNA binding protein fox-1 homolog 3;Isoform 2 of RNA binding protein fox-1 homolog 3;Isoform 4 of RNA binding protein fox-1 homolog 3;Isoform 5 of RNA binding protein fox-1 homolog 3;RNA binding protein fox-1 homolog 2;Isoform 2 of RNA binding protein fox-1 homolog 2;Isoform 3 of RNA binding protein fox-1 homolog 2;Isoform 5 of RNA binding protein fox-1 homolog 2;Isoform 6 of RNA binding protein …	RFOX3_MOUSE;RFOX3_MOUSE;RFOX3_MOUSE;RFOX3_MOUSE;RFOX2_MOUSE;RFOX2_MOUSE;RFOX2_MOUSE;RFOX2_MOUSE;RFOX2_MOUSE;RFOX2_MOUSE;RFOX2_MOUSE;RFOX1_MOUSE;RFOX1_MOUSE;RFOX1_MOUSE;RFOX1_MOUSE;RFOX1_MOUSE;RFOX1_MOUSE	inf	0.0913204	0.183054	4.66283e-06
O70589	Cask	Peripheral plasma membrane protein CASK	CSKP_MOUSE	1.14315	0.091433	0.183141	3.6333e-05
Q64133	Maoa	Amine oxidase [flavin-containing] A	AOFA_MOUSE	1.98082	0.0915515	0.183241	2.01373e-05
P15532	Nme1	Nucleoside diphosphate kinase A	NDKA_MOUSE	1.90158	0.0921072	0.184214	2.70171e-05
Q9CQS8	Sec61b	Protein transport protein Sec61 subunit beta	SC61B_MOUSE	1.31473	0.0924175	0.184696	1.55238e-05
P25444	Rps2	40S ribosomal protein S2	RS2_MOUSE	0.802453	0.0926359	0.184994	0.000155434
P56959	Fus	RNA-binding protein FUS	FUS_MOUSE	1.91691	0.0928874	0.185357	6.71404e-05
Q8BY89;Q8BY89-2	Slc44a2	Choline transporter-like protein 2;Isoform 2 of Choline transporter-like protein 2	CTL2_MOUSE	1.10773	0.0930355	0.185513	3.11435e-05
Q9D6M3	Slc25a22	Mitochondrial glutamate carrier 1	GHC1_MOUSE	0.566214	0.0933592	0.185891	0.00012479
Q8C080	Snx16	Sorting nexin-16	SNX16_MOUSE	inf	0.0933646	0.185891	1.52172e-05
Q9EQU5-2	Set	Isoform 2 of Protein SET	SET_MOUSE	1.19903	0.0934612	0.185944	2.33586e-05
Q6PHZ2-5	Camk2d	Isoform 4 of Calcium/calmodulin-dependent protein kinase type II subunit delta	KCC2D_MOUSE	0.930843	0.093625	0.18613	0.000256953
Q8K021	Scamp1	Secretory carrier-associated membrane protein 1	SCAM1_MOUSE	2.21601	0.0937826	0.186305	6.44643e-05
O70435	Psma3	Proteasome subunit alpha type-3	PSA3_MOUSE	0.960825	0.094406	0.187403	4.32224e-05
[truncated: 1,320 more rows]

## Sheet: Ctrl_v_APEX_Str
ProteinAccessions	Genes	ProteinDescriptions	ProteinNames	Log2FC	pvalue	qvalue	Expr
[truncated: 2,869 more rows]
