# Supplementary material for: Subcellular proteomics of dopamine neurons in the mouse brain
Source: eLife. 2022 Jan 31;11:e70921. doi: 10.7554/eLife.70921 (PMC8860448; doi:10.7554/eLife.70921)
Supplement: Figure 2—source data 5. — (1) Striatum bulk tissue vs. striatum APEX2+ streptavidin IP. (2) Ventral midbrain (VM) bulk tissue vs. VM APEX2+ streptavidin IP. [file elife-70921-fig2-data5.xlsx]

## Sheet: Bulk_v_APEX_VM
ProteinAccessions	Genes	ProteinDescriptions	ProteinNames	Log2FC	pvalue	qvalue	Expr
Q9CXW4	Hspa1a	Heat shock 70 kDa protein 1A	HS71A_MOUSE	5.429	1.35874e-09	3.38062e-06	0.00131653
Q91ZA3	Iqsec2	IQ motif and SEC7 domain-containing protein 2	IQEC2_MOUSE	9.27715	1.99681e-09	3.38062e-06	0.0377028
P51163	Asna1	ATPase Asna1	ASNA_MOUSE	-inf	3.23137e-09	3.38062e-06	1.54476e-05
Q60790	Nif3l1	NIF3-like protein 1	NIF3L_MOUSE	-inf	3.5292e-09	3.38062e-06	1.58716e-05
Q9CQU0	Htra2	Serine protease HTRA2, mitochondrial	HTRA2_MOUSE	3.34338	4.23948e-09	3.38062e-06	0.000168012
Q5NCF2	Nfs1	Cysteine desulfurase, mitochondrial	NFS1_MOUSE	-inf	5.37917e-09	3.38062e-06	2.74667e-05
Q8C9H6	recA	Protein RecA	RECA_BRUA2	-inf	5.90394e-09	3.38062e-06	1.67139e-05
P55066	Dnaja3	DnaJ homolog subfamily A member 3, mitochondrial	DNJA3_MOUSE	-inf	5.98077e-09	3.38062e-06	0.000393763
P04925	Fhit	Bis(5'-adenosyl)-triphosphatase	FHIT_MOUSE	-5.19271	6.45221e-09	3.38062e-06	0.000348987
Q80TH2	Il1r1	Interleukin-1 receptor type 1	IL1R1_MOUSE	-inf	6.75415e-09	3.38062e-06	2.52743e-05
Q69ZU6	Map1lc3b	Microtubule-associated proteins 1A/1B light chain 3B	MLP3B_MOUSE	-inf	6.78739e-09	3.38062e-06	2.00417e-05
Q6NV83	Dctn3	Dynactin subunit 3	DCTN3_MOUSE	-inf	7.67224e-09	3.38062e-06	7.00627e-06
Q8BGX2	Bag5	BAG family molecular chaperone regulator 5	BAG5_MOUSE	-inf	8.74789e-09	3.38062e-06	5.6778e-05
O35658	Mpp3	MAGUK p55 subfamily member 3	MPP3_MOUSE	-inf	9.80053e-09	3.38062e-06	0.000475129
Q80UG5	Hccs	Cytochrome c-type heme lyase	CCHL_MOUSE	-inf	1.01476e-08	3.38062e-06	9.58724e-05
Q8C754	Mrps22	28S ribosomal protein S22, mitochondrial	RT22_MOUSE	-inf	1.02505e-08	3.38062e-06	2.65843e-05
P53811	Nnt	NAD(P) transhydrogenase, mitochondrial	NNTM_MOUSE	-inf	1.0296e-08	3.38062e-06	0.000135393
O89084	Rps20	40S ribosomal protein S20	RS20_MOUSE	-inf	1.12228e-08	3.38062e-06	3.01197e-05
P11352	Ubl4a	Ubiquitin-like protein 4A	UBL4A_MOUSE	-inf	1.12747e-08	3.38062e-06	6.215e-05
Q9D5V5	Pkp1	Plakophilin-1	PKP1_MOUSE	-inf	1.27724e-08	3.47e-06	5.027e-05
Q8C4Q6	Hax1	HCLS1-associated protein X-1	HAX1_MOUSE	-inf	1.29246e-08	3.47e-06	2.38658e-05
P51410	Aldh6a1	Methylmalonate-semialdehyde dehydrogenase [acylating], mitochondrial	MMSA_MOUSE	-inf	1.34221e-08	3.47e-06	9.20521e-05
O88910	Nes	Nestin	NEST_MOUSE	-inf	1.40749e-08	3.47e-06	5.69807e-05
P05480	Exoc5	Exocyst complex component 5	EXOC5_MOUSE	-inf	1.59328e-08	3.47e-06	6.15164e-05
O35887	Acad9	Complex I assembly factor ACAD9, mitochondrial	ACAD9_MOUSE	4.79393	1.63622e-08	3.47e-06	0.000876965
P00405	Gcdh	Glutaryl-CoA dehydrogenase, mitochondrial	GCDH_MOUSE	-inf	1.63923e-08	3.47e-06	0.00203259
Q9R0M6	Uchl1	Ubiquitin carboxyl-terminal hydrolase isozyme L1	UCHL1_MOUSE	-inf	1.84494e-08	3.47e-06	3.18183e-05
Q5DU25	Mras	Ras-related protein M-Ras	RASM_MOUSE	-inf	1.85375e-08	3.47e-06	0.000124838
Q9CR21	Arsa	Arylsulfatase A	ARSA_MOUSE	-inf	1.85743e-08	3.47e-06	0.000215786
Q9DCC8	Ssb	Lupus La protein homolog	LA_MOUSE	-inf	1.88143e-08	3.47e-06	0.000114597
Q5H8C4	Timm22	Mitochondrial import inner membrane translocase subunit Tim22	TIM22_MOUSE	-inf	1.88819e-08	3.47e-06	2.4844e-05
P47934	Has1	Hyaluronan synthase 1	HYAS1_MOUSE	-inf	1.97009e-08	3.50738e-06	4.43337e-05
Q91ZP9	Thop1	Thimet oligopeptidase	THOP1_MOUSE	-inf	2.20592e-08	3.69903e-06	8.83648e-05
Q8VBV7	Timm17b	Mitochondrial import inner membrane translocase subunit Tim17-B	TI17B_MOUSE	-inf	2.42778e-08	3.69903e-06	8.39091e-05
Q9QXX4	Them4	Acyl-coenzyme A thioesterase THEM4	THEM4_MOUSE	-inf	2.44303e-08	3.69903e-06	0.000630054
Q9D0S9	Ric8b	Synembryn-B	RIC8B_MOUSE	-inf	2.46879e-08	3.69903e-06	0.000108459
Q9WTX2	Pmpca	Mitochondrial-processing peptidase subunit alpha	MPPA_MOUSE	-inf	2.4765e-08	3.69903e-06	1.11208e-05
Q61696	Adk	Adenosine kinase	ADK_MOUSE	-inf	2.62598e-08	3.69903e-06	0.00141226
Q8CDG3	Gnb2	Guanine nucleotide-binding protein G(I)/G(S)/G(T) subunit beta-2	GBB2_MOUSE	-inf	2.6424e-08	3.69903e-06	3.01847e-05
Q63932	Qki	Protein quaking	QKI_MOUSE	-inf	2.65897e-08	3.69903e-06	0.000294089
Q9JIG7	Plbd2	Putative phospholipase B-like 2	PLBL2_MOUSE	-inf	2.79058e-08	3.69903e-06	1.28023e-05
Q99PV0	Elob	Elongin-B	ELOB_MOUSE	-inf	2.79538e-08	3.69903e-06	2.07165e-05
Q9Z0P5	Dnajc11	DnaJ homolog subfamily C member 11	DJC11_MOUSE	-inf	2.95677e-08	3.69903e-06	6.46967e-05
P54869	H2bc4;H2BC4;Hist1h2bb;HIST1H2BD;Hist1h2bf;Hist1h2bh;HIST1H2BH;Hist1h2bk;HIST1H2BK;HIST1H2BL;Hist1h2bm;HIST1H2BM;HIST1H2BN;Hist1h2bp;Hist2h2bb	Histone H2B type 1-C/E/G;Histone H2B type 1-C/E/F/G/I;Histone H2B type 1-B;Histone H2B type 1-D;Histone H2B type 1-F/J/L;Histone H2B type 1-H;Histone H2B type 1-H;Histone H2B type 1-K;Histone H2B type 1-K;Histone H2B type 1-L;Histone H2B type 1-M;Histone H2B type 1-M;Histone H2B type 1-N;Histone H2B type 1-P;Histone H2B type 2-B	H2B1C_MOUSE;H2B1C_HUMAN;H2B1B_MOUSE;H2B1D_HUMAN;H2B1F_MOUSE;H2B1H_MOUSE;H2B1H_HUMAN;H2B1K_MOUSE;H2B1K_HUMAN;H2B1L_HUMAN;H2B1M_MOUSE;H2B1M_HUMAN;H2B1N_HUMAN;H2B1P_MOUSE;H2B2B_MOUSE	-inf	2.96776e-08	3.69903e-06	1.25761e-05
P14733	Fabp7	Fatty acid-binding protein, brain	FABP7_MOUSE	-inf	3.00103e-08	3.69903e-06	7.39623e-05
Q99KX1	Pde8a	High affinity cAMP-specific and IBMX-insensitive 3',5'-cyclic phosphodiesterase 8A	PDE8A_MOUSE	-inf	3.05644e-08	3.69903e-06	0.000103854
Q925I1	Cryl1	Lambda-crystallin homolog	CRYL1_MOUSE	-inf	3.20829e-08	3.69903e-06	9.11994e-05
Q8VDM6	Echs1	Enoyl-CoA hydratase, mitochondrial	ECHM_MOUSE	-inf	3.36226e-08	3.69903e-06	2.61437e-05
Q8JZZ7	Rab23	Ras-related protein Rab-23	RAB23_MOUSE	-inf	3.79025e-08	3.69903e-06	2.15606e-05
Q9EQ80	Txndc17	Thioredoxin domain-containing protein 17	TXD17_MOUSE	-inf	3.8133e-08	3.69903e-06	7.24003e-05
Q9D3P8	Acadl	Long-chain specific acyl-CoA dehydrogenase, mitochondrial	ACADL_MOUSE	-inf	3.86273e-08	3.69903e-06	2.77951e-05
Q3UBX0	Gcsh	Glycine cleavage system H protein, mitochondrial	GCSH_MOUSE	-inf	3.94691e-08	3.69903e-06	3.8033e-05
Q8CAK1	S100a13	Protein S100-A13	S10AD_MOUSE	-inf	3.98196e-08	3.69903e-06	2.68323e-05
Q03517	Abce1	ATP-binding cassette sub-family E member 1	ABCE1_MOUSE	-inf	4.02388e-08	3.69903e-06	0.000325282
Q9D4H1	Cox6a1	Cytochrome c oxidase subunit 6A1, mitochondrial	CX6A1_MOUSE	-inf	4.06732e-08	3.69903e-06	3.44361e-05
Q9CPV9	Pnpla8	Calcium-independent phospholipase A2-gamma	PLPL8_MOUSE	-inf	4.07436e-08	3.69903e-06	2.3047e-05
Q9CYI4	Pycr2	Pyrroline-5-carboxylate reductase 2	P5CR2_MOUSE	-inf	4.12271e-08	3.69903e-06	1.3312e-05
Q9JJ28	Bbs2	Bardet-Biedl syndrome 2 protein homolog	BBS2_MOUSE	-inf	4.15761e-08	3.69903e-06	1.47199e-05
Q9DB27	Ephx2	Bifunctional epoxide hydrolase 2	HYES_MOUSE	-inf	4.35728e-08	3.69903e-06	5.76909e-05
Q8R3Q6	Vps33b	Vacuolar protein sorting-associated protein 33B	VP33B_MOUSE	-inf	4.38997e-08	3.69903e-06	2.14442e-05
Q9EPE9	Dnajc3	DnaJ homolog subfamily C member 3	DNJC3_MOUSE	-inf	4.40393e-08	3.69903e-06	1.92323e-05
Q60737	Homer2	Homer protein homolog 2	HOME2_MOUSE	-2.19863	4.48704e-08	3.69903e-06	0.000161024
Q6PHZ8	Cc2d1a	Coiled-coil and C2 domain-containing protein 1A	C2D1A_MOUSE	-inf	4.54773e-08	3.69903e-06	2.88571e-05
Q9CWF6	Ndufb6	NADH dehydrogenase [ubiquinone] 1 beta subcomplex subunit 6	NDUB6_MOUSE	-inf	4.57786e-08	3.69903e-06	2.0619e-05
Q9QYS9	Ppie	Peptidyl-prolyl cis-trans isomerase E	PPIE_MOUSE	-inf	4.60953e-08	3.69903e-06	3.06081e-05
Q8R164	Pgam2	Phosphoglycerate mutase 2	PGAM2_MOUSE	-inf	4.63392e-08	3.69903e-06	0.000170083
P70182	Ndufb2	NADH dehydrogenase [ubiquinone] 1 beta subcomplex subunit 2, mitochondrial	NDUB2_MOUSE	-inf	4.64909e-08	3.69903e-06	0.000114184
Q9CRD2	Gnb1	Guanine nucleotide-binding protein G(I)/G(S)/G(T) subunit beta-1	GBB1_MOUSE	-inf	4.85572e-08	3.69903e-06	2.0659e-05
P13504	Emc8	ER membrane protein complex subunit 8	EMC8_MOUSE	-inf	5.1176e-08	3.69903e-06	0.000118794
Q9D1L9	Cul1	Cullin homolog 1,Cullin-1	CUL1_MOUSE	-inf	5.11883e-08	3.69903e-06	3.38665e-05
P0C027	Slc27a1	Long-chain fatty acid transport protein 1	S27A1_MOUSE	-inf	5.15424e-08	3.69903e-06	7.52196e-05
P62869	Fkbp1a	Peptidyl-prolyl cis-trans isomerase FKBP1A	FKB1A_MOUSE	-inf	5.18625e-08	3.69903e-06	0.000146407
Q9CQE3	Nit2	Omega-amidase NIT2	NIT2_MOUSE	-inf	5.28457e-08	3.69903e-06	7.16814e-06
Q9CYW4	Emc4	ER membrane protein complex subunit 4	EMC4_MOUSE	-inf	5.30664e-08	3.69903e-06	2.45959e-05
Q04750	Fahd2	Fumarylacetoacetate hydrolase domain-containing protein 2A	FAHD2_MOUSE	-inf	5.44916e-08	3.69903e-06	1.61329e-05
O88952	Cacna2d2	Voltage-dependent calcium channel subunit alpha-2/delta-2	CA2D2_MOUSE	-inf	5.52e-08	3.69903e-06	0.000122076
Q9D0T1	Hectd3	E3 ubiquitin-protein ligase HECTD3	HECD3_MOUSE	-inf	5.5606e-08	3.69903e-06	5.25961e-05
P63260	Rps19	40S ribosomal protein S19	RS19_MOUSE	-inf	5.57203e-08	3.69903e-06	0.00148776
Q9QYJ3	Epdr1	Mammalian ependymin-related protein 1	EPDR1_MOUSE	-inf	5.63095e-08	3.69903e-06	3.96684e-05
A2A8L5	Vars	Valine--tRNA ligase	SYVC_MOUSE	-inf	5.72277e-08	3.69903e-06	1.15296e-05
Q9WVA2	Nop56	Nucleolar protein 56	NOP56_MOUSE	-inf	5.80081e-08	3.69903e-06	6.0374e-05
O35593	Bscl2	Seipin	BSCL2_MOUSE	-inf	5.83898e-08	3.69903e-06	7.86118e-05
Q3TC72	Prodh	Proline dehydrogenase 1, mitochondrial	PROD_MOUSE	-inf	5.86829e-08	3.69903e-06	0.000128633
Q3TEA8	Slc3a2	4F2 cell-surface antigen heavy chain	4F2_MOUSE	-inf	5.973e-08	3.69903e-06	0.000117809
Q3TPX4	Mrps27	28S ribosomal protein S27, mitochondrial	RT27_MOUSE	-inf	6.11849e-08	3.69903e-06	3.3376e-05
A2ASZ8	Vps52	Vacuolar protein sorting-associated protein 52 homolog	VPS52_MOUSE	-inf	6.17316e-08	3.69903e-06	4.12961e-05
Q91VR8	Atp5mpl	ATP synthase subunit ATP5MPL, mitochondrial	ATP68_MOUSE	-inf	6.19404e-08	3.69903e-06	0.000182511
Q8BH47	Timm8b	Mitochondrial import inner membrane translocase subunit Tim8 B	TIM8B_MOUSE	-inf	6.29162e-08	3.69903e-06	4.81517e-06
Q9Z2D1	Isyna1	Inositol-3-phosphate synthase 1	INO1_MOUSE	-inf	6.30147e-08	3.69903e-06	2.34105e-05
P97478	Actb;ACTB,ACTB	Actin, cytoplasmic 1;Actin, cytoplasmic 1,Actin, cytoplasmic 1	ACTB_MOUSE;ACTB_BOVIN,ACTB_HUMAN	-inf	6.33758e-08	3.69903e-06	2.51654e-05
Q03059	Nt5c	5'(3')-deoxyribonucleotidase, cytosolic type	NT5C_MOUSE	-inf	6.33792e-08	3.69903e-06	4.12832e-05
P54763	Ndufs4	NADH dehydrogenase [ubiquinone] iron-sulfur protein 4, mitochondrial	NDUS4_MOUSE	-inf	6.42871e-08	3.69903e-06	3.09661e-06
Q9CQ86	Mrpl12	39S ribosomal protein L12, mitochondrial	RM12_MOUSE	-inf	6.5111e-08	3.69903e-06	9.88253e-05
P56380	Opa3	Optic atrophy 3 protein homolog	OPA3_MOUSE	-inf	6.51395e-08	3.69903e-06	3.5921e-05
P45591	Tst	Thiosulfate sulfurtransferase	THTR_MOUSE	-inf	6.52512e-08	3.69903e-06	0.000168736
P97300	Washc5	WASH complex subunit 5	WASC5_MOUSE	-2.75574	6.53612e-08	3.69903e-06	0.000487518
Q8BWG8	Ndufb9	NADH dehydrogenase [ubiquinone] 1 beta subcomplex subunit 9	NDUB9_MOUSE	-inf	6.67223e-08	3.69903e-06	5.02018e-05
Q9JIY5	Nploc4	Nuclear protein localization protein 4 homolog	NPL4_MOUSE	-inf	6.78537e-08	3.69903e-06	3.2033e-05
Q9CQV6	Acadsb	Short/branched chain specific acyl-CoA dehydrogenase, mitochondrial	ACDSB_MOUSE	-inf	6.85377e-08	3.69903e-06	0.000460823
Q924T2	Tmod1	Tropomodulin-1	TMOD1_MOUSE	-inf	6.96779e-08	3.69903e-06	1.49595e-05
Q7TNS2	Ric8a	Synembryn-A	RIC8A_MOUSE	-inf	6.98186e-08	3.69903e-06	4.19305e-05
A2A5R2	Lamp2	Lysosome-associated membrane glycoprotein 2	LAMP2_MOUSE	-inf	7.09915e-08	3.69903e-06	2.59716e-05
P47758	Fam210a	Protein FAM210A	F210A_MOUSE	-inf	7.10336e-08	3.69903e-06	8.93544e-06
P62751	Dhx9	ATP-dependent RNA helicase A	DHX9_MOUSE	-inf	7.26465e-08	3.69903e-06	0.000185081
Q60875	Hint2	Histidine triad nucleotide-binding protein 2, mitochondrial	HINT2_MOUSE	-inf	7.386e-08	3.69903e-06	7.57014e-05
O88696	Aco1	Cytoplasmic aconitate hydratase	ACOC_MOUSE	-inf	7.41164e-08	3.69903e-06	8.25877e-05
Q3UH93	Npc2	NPC intracellular cholesterol transporter 2	NPC2_MOUSE	-inf	7.59783e-08	3.69903e-06	2.88508e-05
Q8CAK3	Ppp1r9b	Neurabin-2	NEB2_MOUSE	-inf	7.80169e-08	3.69903e-06	1.31775e-05
Q8K4Z5	Asl	Argininosuccinate lyase	ARLY_MOUSE	-inf	7.88408e-08	3.69903e-06	2.64337e-05
Q8K019	Mrps26	28S ribosomal protein S26, mitochondrial	RT26_MOUSE	-inf	7.89769e-08	3.69903e-06	0.000109133
Q8BPU7	Acad8	Isobutyryl-CoA dehydrogenase, mitochondrial	ACAD8_MOUSE	-inf	7.98051e-08	3.69903e-06	2.08358e-05
Q64442	Kcna3	Potassium voltage-gated channel subfamily A member 3	KCNA3_MOUSE	-inf	8.03374e-08	3.69903e-06	4.96199e-05
Q9D6U8	Ndufb7	NADH dehydrogenase [ubiquinone] 1 beta subcomplex subunit 7	NDUB7_MOUSE	-inf	8.03973e-08	3.69903e-06	0.000119078
Q9D1T0	Uqcrc1	Cytochrome b-c1 complex subunit 1, mitochondrial	QCR1_MOUSE	-inf	8.06305e-08	3.69903e-06	0.000102502
Q80UU9	Ubl3	Ubiquitin-like protein 3	UBL3_MOUSE	-inf	8.09581e-08	3.69903e-06	0.000143766
Q60714	Lars	Leucine--tRNA ligase, cytoplasmic	SYLC_MOUSE	-inf	8.15904e-08	3.69903e-06	2.38914e-05
P27661	Aldob	Fructose-bisphosphate aldolase B	ALDOB_MOUSE	-inf	8.29043e-08	3.69903e-06	0.000893973
Q8JZY2	Oat	Ornithine aminotransferase, mitochondrial	OAT_MOUSE	-inf	8.32911e-08	3.69903e-06	2.36779e-05
P62996	Maoa	Amine oxidase [flavin-containing] A	AOFA_MOUSE	-inf	8.33409e-08	3.69903e-06	4.80023e-05
Q8BHG2	Mrps15	28S ribosomal protein S15, mitochondrial	RT15_MOUSE	-inf	8.35279e-08	3.69903e-06	3.54899e-05
Q99K85	Agrn	Agrin	AGRIN_MOUSE	-inf	8.38503e-08	3.69903e-06	0.00018574
O89001	Cd38	ADP-ribosyl cyclase/cyclic ADP-ribose hydrolase 1	CD38_MOUSE	-inf	8.42071e-08	3.69903e-06	9.78503e-06
Q9CQV1	Tspan14	Tetraspanin-14	TSN14_MOUSE	-inf	8.5148e-08	3.69903e-06	2.41055e-05
Q9CR98	Rps21	40S ribosomal protein S21	RS21_MOUSE	-inf	8.67779e-08	3.69903e-06	8.641e-05
Q64669	Ndufab1	Acyl carrier protein, mitochondrial	ACPM_MOUSE	-inf	8.68635e-08	3.69903e-06	1.09442e-05
Q9D6Z1	Dynlrb1	Dynein light chain roadblock-type 1	DLRB1_MOUSE	-inf	8.82008e-08	3.69903e-06	3.37875e-05
Q9JJI8	Mecr	Enoyl-[acyl-carrier-protein] reductase, mitochondrial	MECR_MOUSE	-inf	8.85337e-08	3.69903e-06	8.84661e-05
Q64331	Czib	CXXC motif containing zinc binding protein	CZIB_MOUSE	-inf	8.96816e-08	3.69903e-06	3.4647e-05
O70133	Nln	Neurolysin, mitochondrial	NEUL_MOUSE	-inf	9.00828e-08	3.69903e-06	9.17744e-05
Q3UUI3	Cenpv	Centromere protein V	CENPV_MOUSE	-inf	9.08785e-08	3.69903e-06	0.000134579
Q9QZH3	Fam162a	Protein FAM162A	F162A_MOUSE	-inf	9.2279e-08	3.69903e-06	0.0011463
O88531	Stau2	Double-stranded RNA-binding protein Staufen homolog 2	STAU2_MOUSE	-inf	9.22825e-08	3.69903e-06	4.65273e-05
Q9DCA2	Eno3	Beta-enolase	ENOB_MOUSE	-inf	9.26159e-08	3.69903e-06	1.26561e-05
P01887	Ampd3	AMP deaminase 3	AMPD3_MOUSE	3.19719	9.27038e-08	3.69903e-06	6.60482e-05
Q9CPR5	Gan	Gigaxonin	GAN_MOUSE	-inf	9.31626e-08	3.69903e-06	8.99187e-06
Q921G7	Daam2	Disheveled-associated activator of morphogenesis 2	DAAM2_MOUSE	-inf	9.32392e-08	3.69903e-06	0.000148857
Q80WW9	Rsl1d1	Ribosomal L1 domain-containing protein 1	RL1D1_MOUSE	-inf	9.34261e-08	3.69903e-06	1.00186e-05
P08556	Pip5k1a	Phosphatidylinositol 4-phosphate 5-kinase type-1 alpha	PI51A_MOUSE	-inf	9.36631e-08	3.69903e-06	0.000101054
Q8R1V4	Dnajb6	DnaJ homolog subfamily B member 6	DNJB6_MOUSE	-inf	9.39641e-08	3.69903e-06	1.65533e-05
Q8VC30	C1qbp	Complement component 1 Q subcomponent-binding protein, mitochondrial,Complement component 1 Q subcomponent-binding protein, mitochondrial	C1QBP_MOUSE	-inf	9.42986e-08	3.69903e-06	1.24767e-05
Q8VE85	Dis3l2	DIS3-like exonuclease 2	DI3L2_MOUSE	-inf	9.47732e-08	3.69903e-06	8.44082e-06
P13595	Lpcat1	Lysophosphatidylcholine acyltransferase 1	PCAT1_MOUSE	-4.33985	9.50698e-08	3.69903e-06	0.00110284
P45952	Vps4a	Vacuolar protein sorting-associated protein 4A	VPS4A_MOUSE	-inf	9.52476e-08	3.69903e-06	9.20544e-05
Q8BGA9	Commd10	COMM domain-containing protein 10	COMDA_MOUSE	-inf	9.53782e-08	3.69903e-06	1.76857e-05
Q9D938	Mcam	Cell surface glycoprotein MUC18	MUC18_MOUSE	-inf	9.59884e-08	3.69903e-06	1.96051e-05
Q9CQ19	Gcn1	eIF-2-alpha kinase activator GCN1	GCN1_MOUSE	-inf	9.61114e-08	3.69903e-06	0.000137796
Q8BH86	Cul5	Cullin-5	CUL5_MOUSE	-inf	9.62206e-08	3.69903e-06	2.14467e-05
P48318	Gmppa	Mannose-1-phosphate guanyltransferase alpha	GMPPA_MOUSE	-inf	9.63702e-08	3.69903e-06	0.000200163
Q3TXX3	Folh1	Glutamate carboxypeptidase 2	FOLH1_MOUSE	-inf	9.67449e-08	3.69903e-06	5.47852e-06
Q99NB9	Dhdh	Trans-1,2-dihydrobenzene-1,2-diol dehydrogenase	DHDH_MOUSE	-inf	9.78662e-08	3.7165e-06	2.25603e-05
Q91VF2	Gmppb	Mannose-1-phosphate guanyltransferase beta	GMPPB_MOUSE	-inf	9.88046e-08	3.7165e-06	3.52024e-05
Q9DB15	Dmac2l	ATP synthase subunit s, mitochondrial	ATP5S_MOUSE	-inf	1.00159e-07	3.7165e-06	0.000142462
P29758	Ccz1	Vacuolar fusion protein CCZ1 homolog	CCZ1_MOUSE	-inf	1.00807e-07	3.7165e-06	7.94869e-05
O89106	Chchd2	Coiled-coil-helix-coiled-coil-helix domain-containing protein 2	CHCH2_MOUSE	-inf	1.01401e-07	3.7165e-06	2.15775e-05
Q9JJR8	Cops8	COP9 signalosome complex subunit 8	CSN8_MOUSE	-inf	1.02378e-07	3.7165e-06	6.2917e-05
Q8VE09	Ankrd34b	Ankyrin repeat domain-containing protein 34B	AN34B_MOUSE	-inf	1.02693e-07	3.7165e-06	1.11015e-05
Q922H4	Mrpl18	39S ribosomal protein L18, mitochondrial	RM18_MOUSE	-inf	1.03283e-07	3.7165e-06	1.86542e-05
Q6PEB6	Hnrnpul1	Heterogeneous nuclear ribonucleoprotein U-like protein 1	HNRL1_MOUSE	-inf	1.03788e-07	3.7165e-06	7.72748e-05
Q9D882	Urod	Uroporphyrinogen decarboxylase	DCUP_MOUSE	-inf	1.04045e-07	3.7165e-06	2.73084e-05
Q920N7	Slc35a2	UDP-galactose translocator	S35A2_MOUSE	-inf	1.04821e-07	3.7165e-06	4.85042e-05
Q9CPU2	Ivd	Isovaleryl-CoA dehydrogenase, mitochondrial	IVD_MOUSE	-inf	1.05044e-07	3.7165e-06	0.000331503
P60710	Tm9sf4	Transmembrane 9 superfamily member 4	TM9S4_MOUSE	-inf	1.06143e-07	3.7165e-06	0.0125571
Q920Q6	Mtco2;MT-CO2,MT-CO2,MT-CO2,MT-CO2,MT-CO2,MT-CO2,MT-CO2,MT-CO2,MT-CO2,MT-CO2,MT-CO2,MT-CO2,MT-CO2,MT-CO2	Cytochrome c oxidase subunit 2	COX2_MOUSE;COX2_PERFA,COX2_HYLPR,COX2_HYBUN,COX2_ACOWI,COX2_APOSM,COX2_LEMBA,COX2_MALTY,COX2_APOMY,COX2_RHAPU,COX2_LEGFO,COX2_PRAJA,COX2_ZELHI,COX2_MICTV,COX2_ACOIG	-inf	1.06482e-07	3.7165e-06	1.6713e-05
O35435	Naxd	ATP-dependent (S)-NAD(P)H-hydrate dehydratase	NNRD_MOUSE	-inf	1.06987e-07	3.7165e-06	2.09122e-05
Q9JIK9	Slc9a3r1	Na(+)/H(+) exchange regulatory cofactor NHE-RF1	NHRF1_MOUSE	-inf	1.07814e-07	3.72254e-06	2.31441e-05
Q8VEJ9	Smpd2	Sphingomyelin phosphodiesterase 2	NSMA_MOUSE	-inf	1.08477e-07	3.72285e-06	4.38278e-05
Q8K4Z0	Mrps35	28S ribosomal protein S35, mitochondrial	RT35_MOUSE	-inf	1.09618e-07	3.73947e-06	1.63935e-05
Q9CZR3	Ppp2r5b	Serine/threonine-protein phosphatase 2A 56 kDa regulatory subunit beta isoform	2A5B_MOUSE	-inf	1.1094e-07	3.74721e-06	3.04782e-05
Q9JKK1	Dhrs7b	Dehydrogenase/reductase SDR family member 7B	DRS7B_MOUSE	-inf	1.11552e-07	3.74721e-06	4.5876e-05
P50136	Snap47	Synaptosomal-associated protein 47	SNP47_MOUSE	-inf	1.13355e-07	3.74721e-06	1.3772e-05
O54984	Cntn3	Contactin-3	CNTN3_MOUSE	-inf	1.13642e-07	3.74721e-06	0.00015076
Q9WTS5	Tfam	Transcription factor A, mitochondrial	TFAM_MOUSE	-inf	1.13872e-07	3.74721e-06	0.000441266
Q9QYA2	Trap1	Heat shock protein 75 kDa, mitochondrial	TRAP1_MOUSE	-inf	1.14905e-07	3.74721e-06	8.97421e-05
O70274	Pcbd1	Pterin-4-alpha-carbinolamine dehydratase	PHS_MOUSE	-inf	1.15232e-07	3.74721e-06	2.50651e-05
P34914	Adcyap1r1	Pituitary adenylate cyclase-activating polypeptide type I receptor	PACR_MOUSE	-inf	1.15352e-07	3.74721e-06	4.94818e-05
Q8BHF7	Gad1	Glutamate decarboxylase 1	DCE1_MOUSE	-inf	1.15764e-07	3.74721e-06	2.46186e-05
Q6NVG1	Elp5	Elongator complex protein 5	ELP5_MOUSE	-inf	1.16586e-07	3.7525e-06	2.48797e-05
Q3UVK0	Acss1	Acetyl-coenzyme A synthetase 2-like, mitochondrial	ACS2L_MOUSE	-inf	1.18017e-07	3.76791e-06	1.50328e-05
P70202	Psmd9	26S proteasome non-ATPase regulatory subunit 9	PSMD9_MOUSE	-inf	1.18667e-07	3.76791e-06	8.81867e-05
Q9DBX3	Elmo1	Engulfment and cell motility protein 1	ELMO1_MOUSE	-inf	1.19098e-07	3.76791e-06	1.5045e-05
Q9CY66	Emc2	ER membrane protein complex subunit 2	EMC2_MOUSE	-inf	1.20131e-07	3.76791e-06	1.426e-05
P28271	Ybx3	Y-box-binding protein 3	YBOX3_MOUSE	-inf	1.21387e-07	3.76791e-06	0.000302137
P12961	Babam2	BRISC and BRCA1-A complex member 2	BABA2_MOUSE	-inf	1.22524e-07	3.76791e-06	7.03427e-05
Q9D7J4	Mmab	Corrinoid adenosyltransferase	MMAB_MOUSE	-inf	1.22578e-07	3.76791e-06	2.62787e-05
Q6NS52	Timm29	Mitochondrial import inner membrane translocase subunit Tim29	TIM29_MOUSE	-inf	1.22838e-07	3.76791e-06	0.000205211
P32020	Uqcrh	Cytochrome b-c1 complex subunit 6, mitochondrial	QCR6_MOUSE	-inf	1.24412e-07	3.76791e-06	9.40362e-05
Q8K4F5	Cyth3	Cytohesin-3	CYH3_MOUSE	-inf	1.24555e-07	3.76791e-06	1.77437e-05
Q61941	Clic4	Chloride intracellular channel protein 4	CLIC4_MOUSE	-inf	1.24731e-07	3.76791e-06	7.47417e-05
O08739	Cdh10	Cadherin-10	CAD10_MOUSE	-inf	1.25002e-07	3.76791e-06	2.35251e-05
Q8K1L5	Sdr39u1	Epimerase family protein SDR39U1	D39U1_MOUSE	-inf	1.26058e-07	3.77366e-06	1.79904e-05
Q9Z1J3	Blvra	Biliverdin reductase A	BIEA_MOUSE	-inf	1.26517e-07	3.77366e-06	7.3892e-05
Q00558	Lamtor4	Ragulator complex protein LAMTOR4	LTOR4_MOUSE	-inf	1.28659e-07	3.79273e-06	2.09893e-05
O35943	Sh3kbp1	SH3 domain-containing kinase-binding protein 1	SH3K1_MOUSE	-inf	1.2941e-07	3.79273e-06	1.9019e-05
O54946	Kcnc4	Potassium voltage-gated channel subfamily C member 4	KCNC4_MOUSE	-inf	1.30794e-07	3.79273e-06	4.96978e-05
P62315	Mars	Methionine--tRNA ligase, cytoplasmic	SYMC_MOUSE	-inf	1.31002e-07	3.79273e-06	2.5022e-05
Q3URD3	Coq5	2-methoxy-6-polyprenyl-1,4-benzoquinol methylase, mitochondrial	COQ5_MOUSE	-inf	1.32043e-07	3.79273e-06	2.6523e-05
Q99KW9	Cmpk2	UMP-CMP kinase 2, mitochondrial	CMPK2_MOUSE	-inf	1.33819e-07	3.79273e-06	2.68426e-05
Q80VL1	Plin4	Perilipin-4	PLIN4_MOUSE	-inf	1.33896e-07	3.79273e-06	1.98347e-05
Q80ZW2	Vps13a	Vacuolar protein sorting-associated protein 13A	VP13A_MOUSE	-inf	1.34065e-07	3.79273e-06	4.01588e-05
Q9WUQ2	Ca14	Carbonic anhydrase 14	CAH14_MOUSE	-inf	1.3502e-07	3.79273e-06	2.02722e-05
Q80Y14	Impa1	Inositol monophosphatase 1	IMPA1_MOUSE	-inf	1.36248e-07	3.79273e-06	5.96782e-05
Q9DBC0	Iscu	Iron-sulfur cluster assembly enzyme ISCU, mitochondrial	ISCU_MOUSE	-inf	1.37051e-07	3.79273e-06	1.13068e-05
Q6ZPR4	Asns	Asparagine synthetase [glutamine-hydrolyzing]	ASNS_MOUSE	-inf	1.37065e-07	3.79273e-06	5.95925e-06
P35285	Lrrc8a	Volume-regulated anion channel subunit LRRC8A	LRC8A_MOUSE	-inf	1.37141e-07	3.79273e-06	4.12926e-05
Q9CR61	Scn1b	Sodium channel subunit beta-1	SCN1B_MOUSE	-inf	1.37202e-07	3.79273e-06	0.000293205
P29595	Mrpl11	39S ribosomal protein L11, mitochondrial	RM11_MOUSE	-inf	1.38046e-07	3.79273e-06	0.000152097
P55264	Plxnc1	Plexin-C1	PLXC1_MOUSE	-inf	1.38434e-07	3.79273e-06	0.000119939
Q9D7P6	Acot11	Acyl-coenzyme A thioesterase 11	ACO11_MOUSE	-inf	1.38894e-07	3.79273e-06	5.4861e-05
Q9CQR2	Eif2b1	Translation initiation factor eIF-2B subunit alpha	EI2BA_MOUSE	-inf	1.392e-07	3.79273e-06	0.000150828
Q8BH27	Ykt6	Synaptobrevin homolog YKT6	YKT6_MOUSE	-inf	1.41993e-07	3.79273e-06	9.80642e-06
Q9CZX8	Tars2	Threonine--tRNA ligase, mitochondrial	SYTM_MOUSE	-inf	1.42358e-07	3.79273e-06	0.000207958
P70335	Acap2	Arf-GAP with coiled-coil, ANK repeat and PH domain-containing protein 2	ACAP2_MOUSE	-inf	1.43903e-07	3.79273e-06	7.21035e-05
Q99M87	Lmnb2	Lamin-B2	LMNB2_MOUSE	-inf	1.44312e-07	3.79273e-06	6.77448e-05
P39447	Sar1b	GTP-binding protein SAR1b	SAR1B_MOUSE	-inf	1.44713e-07	3.79273e-06	3.11715e-05
Q9CXS4	Abhd4	(Lyso)-N-acylphosphatidylethanolamine lipase	ABHD4_MOUSE	-inf	1.45321e-07	3.79273e-06	9.629e-05
Q91WT9	Dtymk	Thymidylate kinase	KTHY_MOUSE	-inf	1.46022e-07	3.79273e-06	1.22302e-05
Q3UHG7	Nid2	Nidogen-2	NID2_MOUSE	-inf	1.47399e-07	3.79273e-06	7.91268e-06
P97352	Nmral1	NmrA-like family domain-containing protein 1	NMRL1_MOUSE	-inf	1.47507e-07	3.79273e-06	8.46183e-05
Q3UHB1	Pspc1	Paraspeckle component 1	PSPC1_MOUSE	-inf	1.48801e-07	3.79273e-06	5.21086e-05
Q2YRU7	Tsfm	Elongation factor Ts, mitochondrial	EFTS_MOUSE	-inf	1.49526e-07	3.79273e-06	0.000238106
Q8BL97	Exoc2	Exocyst complex component 2	EXOC2_MOUSE	-inf	1.49693e-07	3.79273e-06	0.000118155
Q922Q4	Ufc1	Ubiquitin-fold modifier-conjugating enzyme 1	UFC1_MOUSE	-inf	1.51169e-07	3.79273e-06	4.19997e-05
Q5SUC9	Lyrm4	LYR motif-containing protein 4	LYRM4_MOUSE	-inf	1.52518e-07	3.79273e-06	1.95138e-05
O08600	Pfdn5	Prefoldin subunit 5	PFD5_MOUSE	-inf	1.52622e-07	3.79273e-06	1.7729e-05
Q9CZL5	Atad3	ATPase family AAA domain-containing protein 3	ATAD3_MOUSE	-inf	1.52625e-07	3.79273e-06	2.20435e-05
Q9WTP7	Dnajb1	DnaJ homolog subfamily B member 1	DNJB1_MOUSE	-inf	1.53564e-07	3.79273e-06	0.000111097
Q9D8S4	Akr7a2	Aflatoxin B1 aldehyde reductase member 2	ARK72_MOUSE	-inf	1.53764e-07	3.79273e-06	5.76935e-05
Q67BT3	Lxn	Latexin	LXN_MOUSE	-inf	1.53874e-07	3.79273e-06	1.45283e-05
Q5DTY9	Srsf6	Serine/arginine-rich splicing factor 6	SRSF6_MOUSE	-inf	1.53964e-07	3.79273e-06	9.55712e-05
Q9CS42	Npl	N-acetylneuraminate lyase	NPL_MOUSE	-inf	1.54619e-07	3.79273e-06	0.000154674
Q91W43	Tstd3	Thiosulfate sulfurtransferase/rhodanese-like domain-containing protein 3	TSTD3_MOUSE	-inf	1.55268e-07	3.79273e-06	9.09239e-06
P62317	Nlgn2	Neuroligin-2	NLGN2_MOUSE	-inf	1.5598e-07	3.79273e-06	6.37563e-05
Q3UZP4	Chmp6	Charged multivesicular body protein 6	CHMP6_MOUSE	-inf	1.56003e-07	3.79273e-06	6.9912e-05
P47740	Txlna	Alpha-taxilin	TXLNA_MOUSE	-inf	1.56041e-07	3.79273e-06	4.038e-05
Q8VC42	Rock1	Rho-associated protein kinase 1	ROCK1_MOUSE	-inf	1.56449e-07	3.79273e-06	6.49004e-06
Q9ERA0	Gaa	Lysosomal alpha-glucosidase	LYAG_MOUSE	-inf	1.57645e-07	3.79579e-06	6.41304e-06
P47962	Gfod1	Glucose-fructose oxidoreductase domain-containing protein 1	GFOD1_MOUSE	-inf	1.5825e-07	3.79579e-06	9.29187e-05
Q91XD6	Mvp	Major vault protein	MVP_MOUSE	-inf	1.59205e-07	3.79579e-06	9.64497e-06
O08547	Pfdn2	Prefoldin subunit 2	PFD2_MOUSE	-1.33488	1.59477e-07	3.79579e-06	8.38677e-05
Q9D9V3	Sema7a	Semaphorin-7A	SEM7A_MOUSE	-inf	1.59988e-07	3.79579e-06	3.62645e-05
Q9CPZ8	Fsd1l	FSD1-like protein	FSD1L_MOUSE	-inf	1.60573e-07	3.79579e-06	1.89868e-05
P42208	Itfg1	T-cell immunomodulatory protein	TIP_MOUSE	-inf	1.62172e-07	3.81774e-06	5.76374e-05
Q3V3R1	Srsf10	Serine/arginine-rich splicing factor 10	SRS10_MOUSE	-inf	1.66073e-07	3.88014e-06	5.17495e-05
O70250	Nrip2	Nuclear receptor-interacting protein 2	NRIP2_MOUSE	-inf	1.66185e-07	3.88014e-06	0.000964599
P22437	Etfdh	Electron transfer flavoprotein-ubiquinone oxidoreductase, mitochondrial	ETFD_MOUSE	9.7131	1.67919e-07	3.90462e-06	0.00117484
Q8K2Q7	Slc30a1	Zinc transporter 1	ZNT1_MOUSE	-inf	1.72067e-07	3.91665e-06	2.35133e-05
A6X919	Pa2g4	Proliferation-associated protein 2G4	PA2G4_MOUSE	-inf	1.7231e-07	3.91665e-06	5.71952e-06
P18572	Mtpap	Poly(A) RNA polymerase, mitochondrial	PAPD1_MOUSE	-inf	1.7307e-07	3.91665e-06	0.000180538
Q9ET30	Fbxo7	F-box only protein 7	FBX7_MOUSE	-inf	1.73233e-07	3.91665e-06	2.93395e-05
Q99LC5	Ndufb4	NADH dehydrogenase [ubiquinone] 1 beta subcomplex subunit 4	NDUB4_MOUSE	-2.22041	1.74151e-07	3.91665e-06	0.00021352
Q9CQ85	Snrpd2	Small nuclear ribonucleoprotein Sm D2	SMD2_MOUSE	-inf	1.74229e-07	3.91665e-06	5.91211e-05
P38060	Rexo2	Oligoribonuclease, mitochondrial	ORN_MOUSE	-inf	1.74667e-07	3.91665e-06	8.12514e-05
Q9QZC2	Qars	Glutamine--tRNA ligase	SYQ_MOUSE	-inf	1.74971e-07	3.91665e-06	6.33287e-05
Q8R4N0	Marcksl1	MARCKS-related protein	MRP_MOUSE	-inf	1.75075e-07	3.91665e-06	5.84649e-05
Q5M8N4	Adpgk	ADP-dependent glucokinase	ADPGK_MOUSE	-inf	1.75311e-07	3.91665e-06	4.68755e-05
Q8CH18	Snx18	Sorting nexin-18	SNX18_MOUSE	-inf	1.7741e-07	3.94026e-06	1.9001e-05
Q8BXJ9	Pin4	Peptidyl-prolyl cis-trans isomerase NIMA-interacting 4	PIN4_MOUSE	-inf	1.78128e-07	3.94026e-06	4.14249e-06
P83887	Sema4d	Semaphorin-4D	SEM4D_MOUSE	-inf	1.79028e-07	3.94026e-06	3.22368e-05
Q60625	Cdk5rap2	CDK5 regulatory subunit-associated protein 2	CK5P2_MOUSE	-2.67084	1.80058e-07	3.94026e-06	0.000209531
O35417	Serpinb1a	Leukocyte elastase inhibitor A	ILEUA_MOUSE	-inf	1.8092e-07	3.94026e-06	2.48058e-05
Q91Z67	Hibch	3-hydroxyisobutyryl-CoA hydrolase, mitochondrial	HIBCH_MOUSE	-inf	1.8239e-07	3.94026e-06	3.26612e-05
Q9CZ42	Shisa4	Protein shisa-4	SHSA4_MOUSE	-inf	1.8262e-07	3.94026e-06	0.000121481
Q9JM14	Mtif2	Translation initiation factor IF-2, mitochondrial	IF2M_MOUSE	-inf	1.83012e-07	3.94026e-06	0.000112799
Q91WL8	Lmnb1	Lamin-B1	LMNB1_MOUSE	-inf	1.83665e-07	3.94026e-06	1.3491e-05
Q921Q7	Znf706	Zinc finger protein 706	ZN706_MOUSE	-inf	1.84403e-07	3.94026e-06	2.86697e-05
Q8JZW4	Aldh1l1	Cytosolic 10-formyltetrahydrofolate dehydrogenase	AL1L1_MOUSE	-inf	1.85e-07	3.94026e-06	0.000172623
P48428	Baiap3	BAI1-associated protein 3	BAIP3_MOUSE	-inf	1.85781e-07	3.94026e-06	6.91288e-05
Q9D1M0	Prrt1	Proline-rich transmembrane protein 1	PRRT1_MOUSE	-inf	1.85955e-07	3.94026e-06	4.43167e-05
Q9CY16	Lin7c	Protein lin-7 homolog C	LIN7C_MOUSE	-inf	1.86051e-07	3.94026e-06	2.05631e-05
Q8K298	Mpst	3-mercaptopyruvate sulfurtransferase	THTM_MOUSE	-inf	1.88785e-07	3.98337e-06	6.22739e-05
P42337	Mtres1	Mitochondrial transcription rescue factor 1	MRES1_MOUSE	-inf	1.89621e-07	3.98624e-06	3.69804e-06
Q9CPX7	Spcs2	Signal peptidase complex subunit 2	SPCS2_MOUSE	-inf	1.92417e-07	3.99186e-06	1.60388e-05
Q9JKB3	Setdb1	Histone-lysine N-methyltransferase SETDB1	SETB1_MOUSE	-inf	1.92682e-07	3.99186e-06	2.73035e-06
Q69ZK9	Adprhl2	ADP-ribose glycohydrolase ARH3	ARHL2_MOUSE	-inf	1.92862e-07	3.99186e-06	6.83675e-05
Q8CI43	Rabggta	Geranylgeranyl transferase type-2 subunit alpha	PGTA_MOUSE	-inf	1.93357e-07	3.99186e-06	0.000146306
Q8R0F8	Cbr3	Carbonyl reductase [NADPH] 3	CBR3_MOUSE	-inf	1.9401e-07	3.99186e-06	5.99645e-05
P99028	Sec62	Translocation protein SEC62	SEC62_MOUSE	-inf	1.94603e-07	3.99186e-06	0.000526727
O70480	Nt5c3b	7-methylguanosine phosphate-specific 5'-nucleotidase	5NT3B_MOUSE	-inf	1.95219e-07	3.99186e-06	1.49166e-05
Q9WTM5	Tapt1	Transmembrane anterior posterior transformation protein 1	TAPT1_MOUSE	-inf	1.95494e-07	3.99186e-06	3.50736e-05
Q8C031	Sf1	Splicing factor 1	SF01_MOUSE	-inf	1.97019e-07	4.00625e-06	1.18779e-05
Q8VHQ9	Mmut	Methylmalonyl-CoA mutase, mitochondrial	MUTA_MOUSE	-inf	1.97605e-07	4.00625e-06	3.57123e-05
Q5XPI3	Eloc	Elongin-C	ELOC_MOUSE	-inf	2.00621e-07	4.04222e-06	1.17855e-05
Q6ZWY3	Maip1	m-AAA protease-interacting protein 1, mitochondrial	MAIP1_MOUSE	-inf	2.01084e-07	4.04222e-06	8.10412e-05
Q8CJF9	Dcaf7	DDB1- and CUL4-associated factor 7	DCAF7_MOUSE	-inf	2.01637e-07	4.04222e-06	1.91573e-05
Q9CY64	Tm9sf3	Transmembrane 9 superfamily member 3	TM9S3_MOUSE	-inf	2.02631e-07	4.04222e-06	5.88041e-05
P97429	Itgav	Integrin alpha-V	ITAV_MOUSE	-inf	2.0324e-07	4.04222e-06	3.64065e-06
O55142	Mtfp1	Mitochondrial fission process protein 1	MTFP1_MOUSE	-inf	2.03636e-07	4.04222e-06	8.30812e-05
Q99N94	Mrps34	28S ribosomal protein S34, mitochondrial	RT34_MOUSE	-inf	2.05171e-07	4.04604e-06	2.8729e-05
Q8K215	Acsf2	Medium-chain acyl-CoA ligase ACSF2, mitochondrial	ACSF2_MOUSE	-inf	2.06131e-07	4.04604e-06	5.72782e-05
Q3UX43	Glrx5	Glutaredoxin-related protein 5, mitochondrial	GLRX5_MOUSE	-inf	2.06851e-07	4.04604e-06	4.05103e-05
Q9Z2I8	F8a1	40-kDa huntingtin-associated protein	HAP40_MOUSE	-inf	2.08327e-07	4.04604e-06	4.10035e-05
Q8BH43	Dhrs4	Dehydrogenase/reductase SDR family member 4	DHRS4_MOUSE	-inf	2.08664e-07	4.04604e-06	1.40453e-05
Q3U0D9	Iba57	Putative transferase CAF17 homolog, mitochondrial	CAF17_MOUSE	-inf	2.08996e-07	4.04604e-06	1.12335e-05
P15327	Sf3b6	Splicing factor 3B subunit 6	SF3B6_MOUSE	-inf	2.09089e-07	4.04604e-06	2.16666e-05
Q9ERL9	Acyp1	Acylphosphatase-1	ACYP1_MOUSE	-inf	2.09942e-07	4.04604e-06	5.21772e-05
P17563	GOLGA7B	Golgin subfamily A member 7B	GOG7B_MOUSE	-inf	2.10462e-07	4.04604e-06	4.62958e-05
Q9CQN1	Tmem222	Transmembrane protein 222	TM222_MOUSE	-inf	2.12685e-07	4.04604e-06	6.20733e-05
P49813	Slc25a13	Calcium-binding mitochondrial carrier protein Aralar2	CMC2_MOUSE	-inf	2.13462e-07	4.04604e-06	0.000109129
Q9D0Q7	Naa35	N-alpha-acetyltransferase 35, NatC auxiliary subunit	NAA35_MOUSE	-inf	2.13484e-07	4.04604e-06	1.80667e-05
P51174	Qrsl1	Glutamyl-tRNA(Gln) amidotransferase subunit A, mitochondrial	GATA_MOUSE	-inf	2.13936e-07	4.04604e-06	7.77151e-05
Q9JIQ3	Panx2	Pannexin-2	PANX2_MOUSE	-inf	2.14766e-07	4.04604e-06	7.9522e-06
Q6NVF9	Gng11	Guanine nucleotide-binding protein G(I)/G(S)/G(O) subunit gamma-11	GBG11_MOUSE	-inf	2.15093e-07	4.04604e-06	5.81735e-05
Q8R3L5	Urm1	Ubiquitin-related modifier 1	URM1_MOUSE	-inf	2.15192e-07	4.04604e-06	4.47592e-06
Q6ZWY9	Srsf7	Serine/arginine-rich splicing factor 7	SRSF7_MOUSE	-inf	2.15976e-07	4.04742e-06	0.00287564
Q9WTZ1	Dync1i2	Cytoplasmic dynein 1 intermediate chain 2	DC1I2_MOUSE	-inf	2.16899e-07	4.05139e-06	1.52136e-05
Q9CXY6	Acsl4	Long-chain-fatty-acid--CoA ligase 4	ACSL4_MOUSE	-inf	2.18717e-07	4.07199e-06	5.72007e-05
Q9JMF3	Syt5	Synaptotagmin-5	SYT5_MOUSE	-inf	2.19472e-07	4.07273e-06	5.97981e-05
Q9D5R2	Ube2i	SUMO-conjugating enzyme UBC9	UBC9_MOUSE	-inf	2.20938e-07	4.08663e-06	4.10052e-06
Q9D0R2	Ptrh2	Peptidyl-tRNA hydrolase 2, mitochondrial	PTH2_MOUSE	-inf	2.23517e-07	4.12096e-06	4.18427e-05
Q99J99	Ppt1	Palmitoyl-protein thioesterase 1	PPT1_MOUSE	-inf	2.25884e-07	4.1414e-06	3.87511e-05
Q8QZS1	Wwox	WW domain-containing oxidoreductase	WWOX_MOUSE	-inf	2.26319e-07	4.1414e-06	9.43448e-05
Q9DBS5	Afg1l	AFG1-like ATPase	AFG1L_MOUSE	-inf	2.26807e-07	4.1414e-06	4.48284e-05
Q9CQB5	Mrpl47	39S ribosomal protein L47, mitochondrial	RM47_MOUSE	-inf	2.28724e-07	4.16306e-06	4.28469e-05
Q6ZQ82	Gde1	Glycerophosphodiester phosphodiesterase 1	GDE1_MOUSE	-inf	2.30452e-07	4.18116e-06	1.99694e-05
Q9DBG9	Pde12	2',5'-phosphodiesterase 12	PDE12_MOUSE	-inf	2.37127e-07	4.28861e-06	3.95978e-06
P26516	Dstn	Destrin	DEST_MOUSE	-inf	2.38551e-07	4.30071e-06	4.97696e-05
Q9WUR2	Gamt	Guanidinoacetate N-methyltransferase	GAMT_MOUSE	-inf	2.40675e-07	4.32145e-06	4.75213e-05
Q9WU40	Cldnd1	Claudin domain-containing protein 1	CLDN1_MOUSE	-inf	2.41218e-07	4.32145e-06	4.468e-06
P43406	Llgl1	Lethal(2) giant larvae protein homolog 1	L2GL1_MOUSE	-inf	2.43768e-07	4.35344e-06	1.77288e-05
Q9Z239	Nubpl	Iron-sulfur protein NUBPL	NUBPL_MOUSE	-inf	2.46745e-07	4.38256e-06	6.71836e-05
Q9Z2W8	Nup93	Nuclear pore complex protein Nup93	NUP93_MOUSE	-inf	2.4713e-07	4.38256e-06	8.83163e-06
Q8BH95	Arpc5	Actin-related protein 2/3 complex subunit 5	ARPC5_MOUSE	-inf	2.48456e-07	4.38256e-06	0.000234091
P21447	Acadvl	Very long-chain specific acyl-CoA dehydrogenase, mitochondrial	ACADV_MOUSE	-inf	2.49324e-07	4.38256e-06	2.47948e-05
P09405	Dcun1d1	DCN1-like protein 1	DCNL1_MOUSE	-inf	2.49344e-07	4.38256e-06	0.000166165
Q91YJ5	Pnpla6	Neuropathy target esterase	PLPL6_MOUSE	-inf	2.50975e-07	4.38256e-06	8.9286e-06
Q8R5A3	Flii	Protein flightless-1 homolog	FLII_MOUSE	-inf	2.51266e-07	4.38256e-06	1.22237e-05
P35288	Bckdhb	2-oxoisovalerate dehydrogenase subunit beta, mitochondrial	ODBB_MOUSE	-inf	2.51553e-07	4.38256e-06	3.85267e-05
O88532	Psmd7	26S proteasome non-ATPase regulatory subunit 7	PSMD7_MOUSE	-inf	2.55435e-07	4.43663e-06	1.88613e-05
Q6PAK3	Cdk18	Cyclin-dependent kinase 18	CDK18_MOUSE	-inf	2.5639e-07	4.43969e-06	4.50981e-05
Q8BP40	Tmem229a	Transmembrane protein 229A	T229A_MOUSE	-inf	2.57656e-07	4.44807e-06	1.47081e-05
Q9R0U0	Trnt1	CCA tRNA nucleotidyltransferase 1, mitochondrial	TRNT1_MOUSE	-inf	2.61228e-07	4.49613e-06	2.18339e-05
P84078	Yrdc	YrdC domain-containing protein, mitochondrial	YRDC_MOUSE	-inf	2.63943e-07	4.52917e-06	0.000963881
Q8CHT0	Ggps1	Geranylgeranyl pyrophosphate synthase	GGPPS_MOUSE	-inf	2.6643e-07	4.54919e-06	8.49286e-05
C0HKG5	Tmem127	Transmembrane protein 127	TM127_MOUSE	-inf	2.66707e-07	4.54919e-06	3.50019e-06
Q9JMC3	Lpcat2	Lysophosphatidylcholine acyltransferase 2	PCAT2_MOUSE	-inf	2.71146e-07	4.60205e-06	2.30635e-05
Q80XG9	Plxnb2	Plexin-B2	PLXB2_MOUSE	-inf	2.71813e-07	4.60205e-06	5.69084e-06
Q9WV85	Camlg	Calcium signal-modulating cyclophilin ligand	CAMLG_MOUSE	-inf	2.7223e-07	4.60205e-06	2.74526e-05
Q8BYH7	Zfyve1	Zinc finger FYVE domain-containing protein 1	ZFYV1_MOUSE	-inf	2.73353e-07	4.60738e-06	2.87245e-05
Q9EQK5	Rab22a	Ras-related protein Rab-22A	RB22A_MOUSE	-inf	2.76456e-07	4.64177e-06	7.06794e-05
P62627	Hsd17b8	Estradiol 17-beta-dehydrogenase 8	DHB8_MOUSE	-inf	2.77023e-07	4.64177e-06	0.000131244
B7ZMP1	Acadm	Medium-chain specific acyl-CoA dehydrogenase, mitochondrial	ACADM_MOUSE	-inf	2.80618e-07	4.68821e-06	1.13951e-05
Q9D7N3	Lacc1	Laccase domain-containing protein 1	LACC1_MOUSE	-inf	2.85133e-07	4.74971e-06	1.18873e-05
Q3U5Q7	Nop58	Nucleolar protein 58	NOP58_MOUSE	-inf	2.87345e-07	4.7616e-06	4.78767e-05
Q8K389	Idi1	Isopentenyl-diphosphate Delta-isomerase 1	IDI1_MOUSE	-inf	2.87518e-07	4.7616e-06	0.000193375
P57784	Tomm40	Mitochondrial import receptor subunit TOM40 homolog	TOM40_MOUSE	-inf	2.89469e-07	4.78002e-06	2.49157e-05
P18652	Rab21	Ras-related protein Rab-21	RAB21_MOUSE	-inf	2.91823e-07	4.80497e-06	2.86444e-05
P14152	Exog	Nuclease EXOG, mitochondrial	EXOG_MOUSE	-2.7906	2.93485e-07	4.80844e-06	0.00200745
Q9DCB8	Tmed9	Transmembrane emp24 domain-containing protein 9	TMED9_MOUSE	-inf	2.93722e-07	4.80844e-06	4.57994e-05
O88745	Actl6b	Actin-like protein 6B	ACL6B_MOUSE	-inf	2.95956e-07	4.81295e-06	2.27408e-05
Q9D0J4	Ndufs5	NADH dehydrogenase [ubiquinone] iron-sulfur protein 5	NDUS5_MOUSE	-inf	2.96575e-07	4.81295e-06	1.25018e-05
Q8QZT2	Apmap	Adipocyte plasma membrane-associated protein	APMAP_MOUSE	-inf	2.96862e-07	4.81295e-06	7.82347e-05
Q8K3Z9	Hmgb1;HMGB1,HMGB1	High mobility group protein B1;High mobility group B protein 1,High mobility group protein B1	HMGB1_MOUSE;HMGB1_ARATH,HMGB1_HUMAN	-inf	2.97377e-07	4.81295e-06	1.55757e-06
Q6ZWU9	Ptp4a2	Protein tyrosine phosphatase type IVA 2	TP4A2_MOUSE	-inf	2.9989e-07	4.83537e-06	6.37888e-05
Q9CQ40	Rhot2	Mitochondrial Rho GTPase 2	MIRO2_MOUSE	-inf	3.0046e-07	4.83537e-06	1.23956e-05
Q80YT7	Armt1	Damage-control phosphatase ARMT1	ARMT1_MOUSE	-inf	3.02873e-07	4.84717e-06	2.2614e-05
Q7TNR6	Rsu1;RSU1	Ras suppressor protein 1	RSU1_MOUSE;RSU1_HUMAN	-inf	3.03739e-07	4.84717e-06	2.60983e-05
O55128	Crat	Carnitine O-acetyltransferase	CACP_MOUSE	-inf	3.04426e-07	4.84717e-06	4.39038e-05
P60867	Sppl2b	Signal peptide peptidase-like 2B	SPP2B_MOUSE	-inf	3.04712e-07	4.84717e-06	0.000109547
Q6ZQK5	Nudt2	Bis(5'-nucleosyl)-tetraphosphatase [asymmetrical]	AP4A_MOUSE	-inf	3.05447e-07	4.84717e-06	2.50708e-05
Q9CQ26	Ipo4	Importin-4	IPO4_MOUSE	-inf	3.06421e-07	4.84912e-06	4.34827e-06
Q8BH55	Bsg	Basigin	BASI_MOUSE	-inf	3.09589e-07	4.88567e-06	4.73828e-05
Q7TNC4	Wdr34	WD repeat-containing protein 34	WDR34_MOUSE	-inf	3.11909e-07	4.90752e-06	1.8215e-05
Q99N87	Comtd1	Catechol O-methyltransferase domain-containing protein 1	CMTD1_MOUSE	-inf	3.12808e-07	4.90752e-06	1.35063e-05
Q62421	Slc9a1	Sodium/hydrogen exchanger 1	SL9A1_MOUSE	-inf	3.13558e-07	4.90752e-06	7.63711e-05
P62305	Pgls	6-phosphogluconolactonase	6PGL_MOUSE	-inf	3.20631e-07	4.99132e-06	2.12057e-05
Q99LY9	Arf1;Arf3	ADP-ribosylation factor 1;ADP-ribosylation factor 3	ARF1_MOUSE;ARF3_MOUSE	-inf	3.20664e-07	4.99132e-06	0.000288557
Q6P4T2	Dnpep	Aspartyl aminopeptidase	DNPEP_MOUSE	-inf	3.2212e-07	5.00032e-06	2.39596e-05
P97742	Pip4k2b	Phosphatidylinositol 5-phosphate 4-kinase type-2 beta	PI42B_MOUSE	-inf	3.23897e-07	5.00959e-06	1.53366e-05
O88322	Pip4p1	Type 1 phosphatidylinositol 4,5-bisphosphate 4-phosphatase	PP4P1_MOUSE	-inf	3.24476e-07	5.00959e-06	1.45906e-05
Q9DBB8	Isca2	Iron-sulfur cluster assembly 2 homolog, mitochondrial	ISCA2_MOUSE	-inf	3.27047e-07	5.03286e-06	2.19882e-05
Q62245	Slc9a3r2	Na(+)/H(+) exchange regulatory cofactor NHE-RF2	NHRF2_MOUSE	-inf	3.2775e-07	5.03286e-06	3.17394e-05
Q8VE97	Tbcd	Tubulin-specific chaperone D	TBCD_MOUSE	-inf	3.29488e-07	5.04594e-06	7.81877e-05
Q9D0G0	Rnf141	RING finger protein 141	RN141_MOUSE	-inf	3.31164e-07	5.05802e-06	1.2871e-05
O70378	Dpp3	Dipeptidyl peptidase 3	DPP3_MOUSE	-inf	3.33844e-07	5.07456e-06	2.10654e-05
Q6A0A9	Tbca	Tubulin-specific chaperone A	TBCA_MOUSE	-inf	3.34028e-07	5.07456e-06	3.22394e-05
Q8K310	Mrpl28	39S ribosomal protein L28, mitochondrial	RM28_MOUSE	-inf	3.37693e-07	5.10825e-06	0.000203968
P52623	Spg7	Paraplegin	SPG7_MOUSE	-inf	3.38121e-07	5.10825e-06	1.23481e-05
A2AIL4	Ctps1	CTP synthase 1	PYRG1_MOUSE	-inf	3.40672e-07	5.10825e-06	7.85625e-06
Q9WV98	Srgap2	SLIT-ROBO Rho GTPase-activating protein 2	SRGP2_MOUSE	-inf	3.40723e-07	5.10825e-06	0.000274863
P97461	Aacs	Acetoacetyl-CoA synthetase	AACS_MOUSE	-inf	3.41699e-07	5.10825e-06	0.0001331
Q921M3	Wdr41	WD repeat-containing protein 41	WDR41_MOUSE	-inf	3.42266e-07	5.10825e-06	2.27828e-05
Q9EP89	Suclg2	Succinate--CoA ligase [GDP-forming] subunit beta, mitochondrial	SUCB2_MOUSE	-inf	3.42802e-07	5.10825e-06	5.72143e-05
P62983	Pex3	Peroxisomal biogenesis factor 3	PEX3_MOUSE	-inf	3.44702e-07	5.10825e-06	0.00179555
Q9D2R6	Mpp6	MAGUK p55 subfamily member 6	MPP6_MOUSE	-inf	3.45476e-07	5.10825e-06	5.81913e-05
Q810B6	Hsbp1	Heat shock factor-binding protein 1	HSBP1_MOUSE	-inf	3.45683e-07	5.10825e-06	1.57191e-05
Q8BWQ6	Ttyh2	Protein tweety homolog 2	TTYH2_MOUSE	-inf	3.46139e-07	5.10825e-06	1.34832e-05
Q8R1F1	Cybc1	Cytochrome b-245 chaperone 1	CYBC1_MOUSE	-inf	3.47006e-07	5.10825e-06	7.79855e-06
Q8K1R3	Mocs3	Adenylyltransferase and sulfurtransferase MOCS3	MOCS3_MOUSE	-inf	3.50784e-07	5.14737e-06	1.98491e-05
Q61161	Acsf3	Malonate--CoA ligase ACSF3, mitochondrial	ACSF3_MOUSE	-inf	3.52634e-07	5.14737e-06	2.78873e-06
Q80W21	Nck2	Cytoplasmic protein NCK2	NCK2_MOUSE	-inf	3.53011e-07	5.14737e-06	0.000408021
Q9QYR9	Dock4	Dedicator of cytokinesis protein 4	DOCK4_MOUSE	-inf	3.53277e-07	5.14737e-06	1.86125e-05
O09005	Ccdc22	Coiled-coil domain-containing protein 22	CCD22_MOUSE	-inf	3.55973e-07	5.17341e-06	1.08738e-05
O09172	Scrg1	Scrapie-responsive protein 1	SCRG1_MOUSE	-inf	3.58436e-07	5.19596e-06	3.44927e-05
Q8VCN6	Tbk1	Serine/threonine-protein kinase TBK1	TBK1_MOUSE	-inf	3.59778e-07	5.20218e-06	3.35918e-05
Q9CXW2	Timm9	Mitochondrial import inner membrane translocase subunit Tim9	TIM9_MOUSE	-inf	3.62203e-07	5.22397e-06	2.04998e-05
E9Q6P5	Gnai3	Guanine nucleotide-binding protein G(i) subunit alpha	GNAI3_MOUSE	-inf	3.67844e-07	5.29194e-06	5.90926e-05
Q6PHS9	Nup35	Nucleoporin NUP35	NUP35_MOUSE	-inf	3.72745e-07	5.33713e-06	0.000113043
Q01730	Ecpas	Proteasome adapter and scaffold protein ECM29	ECM29_MOUSE	-inf	3.72859e-07	5.33713e-06	3.00239e-05
Q0P678	Tk2	Thymidine kinase 2, mitochondrial	KITM_MOUSE	-inf	3.77468e-07	5.37304e-06	4.398e-06
Q9DB25	Rab30	Ras-related protein Rab-30	RAB30_MOUSE	-inf	3.77752e-07	5.37304e-06	1.29449e-05
P97930	Syt2	Synaptotagmin-2	SYT2_MOUSE	-inf	3.78197e-07	5.37304e-06	2.60255e-05
O88703	Mat2b	Methionine adenosyltransferase 2 subunit beta	MAT2B_MOUSE	-inf	3.7946e-07	5.37757e-06	4.4242e-05
O08810	Psd3	PH and SEC7 domain-containing protein 3	PSD3_MOUSE	-inf	3.81618e-07	5.39473e-06	2.37938e-05
Q7TSH2	Abcb1a	ATP-dependent translocase ABCB1	MDR1A_MOUSE	-inf	3.83712e-07	5.40534e-06	9.60143e-06
Q8R071	Hap1	Huntingtin-associated protein 1	HAP1_MOUSE	-inf	3.84266e-07	5.40534e-06	5.73202e-05
Q8BMS4	Brk1	Protein BRICK1	BRK1_MOUSE	-inf	3.86562e-07	5.41585e-06	2.25835e-05
Q8R1S0	Rab9a	Ras-related protein Rab-9A	RAB9A_MOUSE	-inf	3.87581e-07	5.41585e-06	3.04815e-05
Q8BGD8	Rmc1	Regulator of MON1-CCZ1 complex	RMC1_MOUSE	-inf	3.88167e-07	5.41585e-06	3.50738e-05
Q3TCN2	Yes1	Tyrosine-protein kinase Yes	YES_MOUSE	-inf	3.88816e-07	5.41585e-06	1.34214e-05
Q499X9	Bmpr1a	Bone morphogenetic protein receptor type-1A	BMR1A_MOUSE	-inf	3.90123e-07	5.41688e-06	6.3704e-06
Q9DCI9	Fkbp2	Peptidyl-prolyl cis-trans isomerase FKBP2	FKBP2_MOUSE	-inf	3.91672e-07	5.41688e-06	6.58334e-06
Q923D4	Eml4	Echinoderm microtubule-associated protein-like 4	EMAL4_MOUSE	-inf	3.92406e-07	5.41688e-06	1.76003e-05
P06745	Sik3	Serine/threonine-protein kinase SIK3	SIK3_MOUSE	-2.5762	3.92693e-07	5.41688e-06	0.0012219
Q9CZR8	Klc4	Kinesin light chain 4	KLC4_MOUSE	-inf	3.94988e-07	5.42705e-06	4.4555e-05
Q9D1L0	Ccdc115	Coiled-coil domain-containing protein 115	CC115_MOUSE	-inf	3.95335e-07	5.42705e-06	4.60373e-05
Q9CPW2	Tenm2	Teneurin-2	TEN2_MOUSE	-inf	3.99009e-07	5.45102e-06	2.8058e-05
P97467	Mien1	Migration and invasion enhancer 1	MIEN1_MOUSE	-inf	3.99075e-07	5.45102e-06	2.69198e-05
Q8C4X2	Isca1	Iron-sulfur cluster assembly 1 homolog, mitochondrial	ISCA1_MOUSE	-inf	4.00241e-07	5.45102e-06	2.25027e-05
P68134	Slc39a12	Zinc transporter ZIP12	S39AC_MOUSE	-inf	4.00909e-07	5.45102e-06	0.00123931
Q99MX0	Echdc2	Enoyl-CoA hydratase domain-containing protein 2, mitochondrial	ECHD2_MOUSE	-inf	4.023e-07	5.45691e-06	0.000137363
Q8VD66	Vcpip1	Deubiquitinating protein VCIP135	VCIP1_MOUSE	-inf	4.0697e-07	5.50714e-06	1.01604e-05
Q641P0	Acads	Short-chain specific acyl-CoA dehydrogenase, mitochondrial	ACADS_MOUSE	-inf	4.11815e-07	5.55951e-06	0.000135609
Q80ZS3	Armc6	Armadillo repeat-containing protein 6	ARMC6_MOUSE	-inf	4.14208e-07	5.57859e-06	1.24359e-05
Q9CYN9	Rras	Ras-related protein R-Ras	RRAS_MOUSE	-inf	4.16685e-07	5.59872e-06	7.09176e-05
P56213	Padi2	Protein-arginine deiminase type-2	PADI2_MOUSE	-inf	4.25144e-07	5.65707e-06	3.00563e-05
Q9EQC5	Igsf9b	Protein turtle homolog B	TUTLB_MOUSE	-inf	4.2645e-07	5.65707e-06	1.38343e-05
Q8CAE9	Wars	Tryptophan--tRNA ligase, cytoplasmic	SYWC_MOUSE	-inf	4.26767e-07	5.65707e-06	4.79333e-06
P53702	Ranbp6	Ran-binding protein 6	RNBP6_MOUSE	-inf	4.27266e-07	5.65707e-06	2.7559e-05
Q9CXP8	Syt11	Synaptotagmin-11	SYT11_MOUSE	-inf	4.27606e-07	5.65707e-06	6.08683e-05
Q9D0B5	Hapln4	Hyaluronan and proteoglycan link protein 4	HPLN4_MOUSE	-inf	4.27803e-07	5.65707e-06	2.22355e-05
Q9Z0Y1	Sf3b1	Splicing factor 3B subunit 1	SF3B1_MOUSE	-inf	4.27979e-07	5.65707e-06	0.000152552
Q8VDK1	Gca	Grancalcin	GRAN_MOUSE	-inf	4.36182e-07	5.73615e-06	5.1266e-05
Q00915	Mrpl50	39S ribosomal protein L50, mitochondrial	RM50_MOUSE	-inf	4.36828e-07	5.73615e-06	3.79642e-05
Q8BVU5	Prickle2	Prickle-like protein 2	PRIC2_MOUSE	-inf	4.38491e-07	5.73615e-06	1.44377e-05
Q9CQJ6	Ppp1r14a	Protein phosphatase 1 regulatory subunit 14A	PP14A_MOUSE	-2.57212	4.38547e-07	5.73615e-06	6.65852e-05
Q8BTI9	Pam	Peptidyl-glycine alpha-amidating monooxygenase	AMD_MOUSE	-inf	4.40601e-07	5.73615e-06	4.22858e-06
Q3TIR3	Pik3cb	Phosphatidylinositol 4,5-bisphosphate 3-kinase catalytic subunit beta isoform	PK3CB_MOUSE	-inf	4.40875e-07	5.73615e-06	1.03552e-05
Q8K386	Eci1	Enoyl-CoA delta isomerase 1, mitochondrial	ECI1_MOUSE	-inf	4.4101e-07	5.73615e-06	3.40175e-05
Q8BMJ2	Abracl	Costars family protein ABRACL	ABRAL_MOUSE	-inf	4.44369e-07	5.76668e-06	3.32929e-05
Q9ET22	Mrpl49	39S ribosomal protein L49, mitochondrial	RM49_MOUSE	-inf	4.47275e-07	5.79119e-06	6.67461e-06
Q5U458	Cmc2	COX assembly mitochondrial protein 2 homolog	COXM2_MOUSE	-inf	4.54467e-07	5.87098e-06	0.000531504
O08989	Msmo1	Methylsterol monooxygenase 1	MSMO1_MOUSE	-inf	4.5602e-07	5.87686e-06	4.72465e-05
Q6Y685	Ugt8	2-hydroxyacylsphingosine 1-beta-galactosyltransferase	CGT_MOUSE	-inf	4.57323e-07	5.87686e-06	3.35707e-05
Q8VH51	Dag1	Dystroglycan	DAG1_MOUSE	-inf	4.58761e-07	5.87686e-06	2.56861e-05
Q8CF66	Vps53	Vacuolar protein sorting-associated protein 53 homolog	VPS53_MOUSE	-inf	4.59049e-07	5.87686e-06	4.98416e-05
D3YZI9	Mrpl45	39S ribosomal protein L45, mitochondrial	RM45_MOUSE	-inf	4.61496e-07	5.88352e-06	3.14516e-05
Q811Q9	Hnmt	Histamine N-methyltransferase	HNMT_MOUSE	-inf	4.61635e-07	5.88352e-06	9.45226e-06
Q8K2M0	Cnpy2	Protein canopy homolog 2	CNPY2_MOUSE	-inf	4.64404e-07	5.9056e-06	1.12758e-05
Q3THW5	Srp19	Signal recognition particle 19 kDa protein	SRP19_MOUSE	-inf	4.65535e-07	5.9068e-06	0.000143438
Q8BGR6	Srprb	Signal recognition particle receptor subunit beta	SRPRB_MOUSE	-inf	4.67551e-07	5.91562e-06	5.7244e-05
Q9CQX8	Tjp2	Tight junction protein ZO-2	ZO2_MOUSE	-inf	4.68856e-07	5.91562e-06	3.96562e-05
P83870	Clybl	Citramalyl-CoA lyase, mitochondrial	CLYBL_MOUSE	-inf	4.69943e-07	5.91562e-06	1.53142e-05
Q9CQA3	Uros	Uroporphyrinogen-III synthase	HEM4_MOUSE	-1.70125	4.70529e-07	5.91562e-06	0.000619219
Q9D1H6	Bpgm	Bisphosphoglycerate mutase	PMGE_MOUSE	-inf	4.71422e-07	5.91562e-06	5.76412e-05
Q3U7U3	Enpp4	Bis(5'-adenosyl)-triphosphatase enpp4	ENPP4_MOUSE	-inf	4.72656e-07	5.91807e-06	1.39361e-05
Q91WM1	Acta1;ACTA1	Actin, alpha skeletal muscle;Actin, alpha skeletal muscle	ACTS_MOUSE;ACTS_RABIT	-inf	4.74655e-07	5.92421e-06	1.48213e-05
Q9ES34	Gskip	GSK3B-interacting protein	GSKIP_MOUSE	-inf	4.75226e-07	5.92421e-06	5.45107e-06
Q3ULF4	Fkbp1b	Peptidyl-prolyl cis-trans isomerase FKBP1B	FKB1B_MOUSE	-inf	4.76323e-07	5.92492e-06	1.78853e-05
Q8BKZ9	Apex1	DNA-(apurinic or apyrimidinic site) lyase	APEX1_MOUSE	-2.32841	4.79078e-07	5.93032e-06	0.000183326
Q8K0Z7	Abhd14b	Protein ABHD14B	ABHEB_MOUSE	-inf	4.79648e-07	5.93032e-06	3.94354e-05
Q99KK7	Thtpa	Thiamine-triphosphatase	THTPA_MOUSE	-inf	4.80776e-07	5.93032e-06	5.99994e-05
Q91VW3	Dpp7	Dipeptidyl peptidase 2	DPP2_MOUSE	-14.646	4.80921e-07	5.93032e-06	0.000300237
A2ASQ1	Commd6	COMM domain-containing protein 6	COMD6_MOUSE	-inf	4.8435e-07	5.9518e-06	2.11513e-05
Q60759	Rnf170	E3 ubiquitin-protein ligase RNF170	RN170_MOUSE	-inf	4.85127e-07	5.9518e-06	4.47658e-05
P36552	Tars1	Threonine--tRNA ligase 1, cytoplasmic	SYTC_MOUSE	-inf	4.85797e-07	5.9518e-06	1.68853e-05
Q91WK5	Synpr	Synaptoporin	SYNPR_MOUSE	-inf	4.88968e-07	5.97779e-06	8.6894e-05
Q3UQ84	Jam2	Junctional adhesion molecule B	JAM2_MOUSE	-inf	4.90661e-07	5.98565e-06	2.58619e-05
Q3U214	Rtn4ip1	Reticulon-4-interacting protein 1, mitochondrial	RT4I1_MOUSE	-inf	4.93517e-07	5.99865e-06	1.61899e-05
Q8C547	C1qtnf4	Complement C1q tumor necrosis factor-related protein 4	C1QT4_MOUSE	-inf	4.94059e-07	5.99865e-06	8.37088e-06
Q61647	Fam91a1	Protein FAM91A1	F91A1_MOUSE	-inf	4.94886e-07	5.99865e-06	0.00016795
Q64511	Pgrmc2	Membrane-associated progesterone receptor component 2	PGRC2_MOUSE	-inf	4.97956e-07	6.02305e-06	1.36749e-05
Q9DB72	Mrpl19	39S ribosomal protein L19, mitochondrial	RM19_MOUSE	-inf	5.03861e-07	6.07004e-06	2.9427e-05
P50171	Tmem109	Transmembrane protein 109	TM109_MOUSE	-inf	5.05885e-07	6.07004e-06	5.73593e-05
Q8R066	Clpp	ATP-dependent Clp protease proteolytic subunit, mitochondrial	CLPP_MOUSE	-inf	5.05889e-07	6.07004e-06	1.38398e-05
P0DP60	Lgi2	Leucine-rich repeat LGI family member 2	LGI2_MOUSE	-inf	5.06103e-07	6.07004e-06	0.00013599
Q9CRA7	Btf3l4	Transcription factor BTF3 homolog 4	BT3L4_MOUSE	-inf	5.10456e-07	6.10939e-06	3.35918e-05
Q80WG5	Sumo3	Small ubiquitin-related modifier 3	SUMO3_MOUSE	-inf	5.16845e-07	6.17288e-06	1.97205e-05
Q9WTX8	Syt12	Synaptotagmin-12	SYT12_MOUSE	6.31854	5.23181e-07	6.23549e-06	6.46069e-05
P54726	Scyl1	N-terminal kinase-like protein	SCYL1_MOUSE	-inf	5.27926e-07	6.27891e-06	0.000107019
Q9D924	Pmm2	Phosphomannomutase 2	PMM2_MOUSE	-inf	5.32303e-07	6.31777e-06	2.78233e-05
Q3TW96	Pdpr	Pyruvate dehydrogenase phosphatase regulatory subunit, mitochondrial	PDPR_MOUSE	-inf	5.38924e-07	6.37604e-06	1.75559e-05
P56376	Samhd1	Deoxynucleoside triphosphate triphosphohydrolase SAMHD1	SAMH1_MOUSE	-inf	5.39451e-07	6.37604e-06	0.000105734
Q6P4S6	Aspscr1	Tether containing UBX domain for GLUT4	ASPC1_MOUSE	-inf	5.44042e-07	6.4094e-06	0.000114339
O35387	Ttll12	Tubulin--tyrosine ligase-like protein 12	TTL12_MOUSE	-inf	5.45511e-07	6.4094e-06	1.72328e-05
Q8R0G7	Ndufaf4	NADH dehydrogenase [ubiquinone] 1 alpha subcomplex assembly factor 4	NDUF4_MOUSE	-inf	5.45648e-07	6.4094e-06	5.73492e-06
Q3UGX3	Psat1	Phosphoserine aminotransferase	SERC_MOUSE	-inf	5.47642e-07	6.41958e-06	9.31609e-06
Q99KP3	Desi1	Desumoylating isopeptidase 1	DESI1_MOUSE	-inf	5.51466e-07	6.45114e-06	2.49009e-05
Q8BYN5	Bckdk	[3-methyl-2-oxobutanoate dehydrogenase [lipoamide]] kinase, mitochondrial	BCKD_MOUSE	-inf	5.54856e-07	6.4742e-06	1.66545e-05
Q8R2Y8	Uqcc2	Ubiquinol-cytochrome-c reductase complex assembly factor 2	UQCC2_MOUSE	-inf	5.5742e-07	6.4742e-06	3.10391e-05
Q8K3W0	Vat1l	Synaptic vesicle membrane protein VAT-1 homolog-like	VAT1L_MOUSE	-inf	5.57511e-07	6.4742e-06	2.31882e-05
Q9CQC9	Atp5mc1;Atp5mc2;Atp5mc3	ATP synthase F(0) complex subunit C1, mitochondrial;ATP synthase F(0) complex subunit C2, mitochondrial;ATP synthase F(0) complex subunit C3, mitochondrial	AT5G1_MOUSE;AT5G2_MOUSE;AT5G3_MOUSE	-inf	5.57984e-07	6.4742e-06	4.02826e-05
P39087	Sos1	Son of sevenless homolog 1	SOS1_MOUSE	-inf	5.64378e-07	6.52846e-06	1.57459e-05
Q99LB2	Mtm1	Myotubularin	MTM1_MOUSE	-inf	5.64964e-07	6.52846e-06	4.76e-05
Q61387	Serinc3	Serine incorporator 3	SERC3_MOUSE	-inf	5.69027e-07	6.52846e-06	1.5162e-05
Q7M6Z0	Cntn4	Contactin-4	CNTN4_MOUSE	-inf	5.71369e-07	6.52846e-06	9.42173e-06
Q8BZT9	Golga2	Golgin subfamily A member 2	GOGA2_MOUSE	-inf	5.71852e-07	6.52846e-06	5.9188e-05
P0C192	Ube2d1	Ubiquitin-conjugating enzyme E2 D1	UB2D1_MOUSE	-inf	5.71896e-07	6.52846e-06	1.55423e-05
P41242	Ak4	Adenylate kinase 4, mitochondrial	KAD4_MOUSE	-inf	5.72627e-07	6.52846e-06	1.22649e-05
Q6PDH0	RTRAF	RNA transcription, translation and transport factor protein	RTRAF_MOUSE	-inf	5.74316e-07	6.52846e-06	3.4008e-06
Q8R3B1	Hip1	Huntingtin-interacting protein 1	HIP1_MOUSE	-inf	5.74782e-07	6.52846e-06	1.15997e-05
Q8BHZ0	Bola1	BolA-like protein 1	BOLA1_MOUSE	-inf	5.74851e-07	6.52846e-06	0.000131509
P20352	Strbp	Spermatid perinuclear RNA-binding protein	STRBP_MOUSE	-inf	5.75265e-07	6.52846e-06	2.43074e-05
Q9DA03	Jcad	Junctional protein associated with coronary artery disease	JCAD_MOUSE	-inf	5.83115e-07	6.57532e-06	1.48154e-05
P67984	Pnck	Calcium/calmodulin-dependent protein kinase type 1B	KCC1B_MOUSE	-inf	5.83296e-07	6.57532e-06	0.000116425
P02468	Rnmt	mRNA cap guanine-N7 methyltransferase	MCES_MOUSE	-inf	5.8453e-07	6.57532e-06	3.35192e-05
Q91YW3	Rps15;RPS15	40S ribosomal protein S15	RS15_MOUSE;RS15_CHICK	-inf	5.84616e-07	6.57532e-06	7.01348e-06
Q9JHI5	Atrn	Attractin	ATRN_MOUSE	-inf	5.87446e-07	6.57532e-06	0.000133903
Q3UI43	Ppm1b	Protein phosphatase 1B	PPM1B_MOUSE	-inf	5.88153e-07	6.57532e-06	1.91718e-05
Q8R326	Shpk	Sedoheptulokinase	SHPK_MOUSE	-inf	5.89033e-07	6.57532e-06	0.000128189
Q62093	Anln	Anillin	ANLN_MOUSE	-inf	5.89101e-07	6.57532e-06	0.000183726
P08113	Cox7a2l	Cytochrome c oxidase subunit 7A-related protein, mitochondrial	COX7R_MOUSE	2.8522	5.89782e-07	6.57532e-06	0.00169859
Q9D7B6	Nsun2	RNA cytosine C(5)-methyltransferase NSUN2	NSUN2_MOUSE	-inf	5.91301e-07	6.57938e-06	4.74497e-05
Q01815	Chga	Chromogranin-A	CMGA_MOUSE	-inf	6.00349e-07	6.66703e-06	3.61972e-06
Q9CQV5	Plxnd1	Plexin-D1	PLXD1_MOUSE	-inf	6.05729e-07	6.71369e-06	2.39383e-05
Q8BRF7	Adam10	Disintegrin and metalloproteinase domain-containing protein 10	ADA10_MOUSE	-inf	6.08142e-07	6.72735e-06	2.10082e-05
Q99J83	Eef1a2	Elongation factor 1-alpha 2	EF1A2_MOUSE	-inf	6.14241e-07	6.78165e-06	1.15299e-05
Q80XE1	Mcts1	Malignant T-cell-amplified sequence 1	MCTS1_MOUSE	-inf	6.16558e-07	6.79407e-06	0.000338564
Q8R349	Sirt5	NAD-dependent protein deacylase sirtuin-5, mitochondrial	SIR5_MOUSE	-inf	6.18415e-07	6.79445e-06	8.49628e-06
Q8BFZ3	Aldh7a1	Alpha-aminoadipic semialdehyde dehydrogenase	AL7A1_MOUSE	-inf	6.18979e-07	6.79445e-06	3.13081e-05
Q6GQS1	Pdcd10	Programmed cell death protein 10	PDC10_MOUSE	-inf	6.2328e-07	6.82851e-06	4.72782e-05
Q8BMK4	Matk	Megakaryocyte-associated tyrosine-protein kinase	MATK_MOUSE	4.78832	6.26222e-07	6.84758e-06	0.000162247
Q9WUB4	Oxsm	3-oxoacyl-[acyl-carrier-protein] synthase, mitochondrial	OXSM_MOUSE	-inf	6.31028e-07	6.88691e-06	2.41495e-05
P10833	Sdf4	45 kDa calcium-binding protein	CAB45_MOUSE	-inf	6.34042e-07	6.89583e-06	2.25261e-05
Q9WTS4	Acot2	Acyl-coenzyme A thioesterase 2, mitochondrial	ACOT2_MOUSE	-inf	6.34859e-07	6.89583e-06	8.3796e-06
Q8VDP4	Mrps2	28S ribosomal protein S2, mitochondrial	RT02_MOUSE	-inf	6.35477e-07	6.89583e-06	2.66957e-05
Q9CWZ3	Mrpl46	39S ribosomal protein L46, mitochondrial	RM46_MOUSE	-inf	6.3863e-07	6.91086e-06	2.19376e-05
O88851	Gng10	Guanine nucleotide-binding protein G(I)/G(S)/G(O) subunit gamma-10	GBG10_MOUSE	-inf	6.39288e-07	6.91086e-06	9.55396e-05
Q64373	Stx6	Syntaxin-6	STX6_MOUSE	-inf	6.50405e-07	7.01772e-06	1.4835e-05
Q5SSZ5	Isoc1	Isochorismatase domain-containing protein 1	ISOC1_MOUSE	-inf	6.52352e-07	7.02543e-06	1.15704e-05
Q8BYL4	Tubg1	Tubulin gamma-1 chain	TBG1_MOUSE	-inf	6.56251e-07	7.05408e-06	1.64357e-05
Q64471	Thnsl1	Threonine synthase-like 1	THNS1_MOUSE	-inf	6.57735e-07	7.05671e-06	1.19939e-05
P61458	Fahd1	Acylpyruvase FAHD1, mitochondrial	FAHD1_MOUSE	-inf	6.59452e-07	7.05954e-06	5.14507e-05
Q80X73	Aip	AH receptor-interacting protein	AIP_MOUSE	-inf	6.61225e-07	7.05954e-06	4.00819e-06
O35857	Aspa	Aspartoacylase	ACY2_MOUSE	-1.85598	6.61716e-07	7.05954e-06	8.61204e-05
Q91W90	Cars	Cysteine--tRNA ligase, cytoplasmic	SYCC_MOUSE	2.06289	6.67758e-07	7.11068e-06	0.000110291
P26339	Wars2	Tryptophan--tRNA ligase, mitochondrial	SYWM_MOUSE	-inf	6.69739e-07	7.11707e-06	1.75922e-05
Q8BM13	Fxyd1	Phospholemman	PLM_MOUSE	-inf	6.70856e-07	7.11707e-06	1.71196e-05
Q9CZP5	Hnrnpf	Heterogeneous nuclear ribonucleoprotein F	HNRPF_MOUSE	-inf	6.72783e-07	7.12425e-06	3.55751e-05
Q61282	Haghl	Hydroxyacylglutathione hydrolase-like protein	HAGHL_MOUSE	-inf	6.78406e-07	7.14866e-06	5.57572e-05
Q9CZ83	Tpmt	Thiopurine S-methyltransferase	TPMT_MOUSE	-inf	6.80412e-07	7.14866e-06	1.42982e-05
Q505D7	Src	Neuronal proto-oncogene tyrosine-protein kinase Src	SRC_MOUSE	-inf	6.81852e-07	7.14866e-06	5.69398e-05
Q9WU79	Pitpnb	Phosphatidylinositol transfer protein beta isoform	PIPNB_MOUSE	-inf	6.81966e-07	7.14866e-06	1.87096e-05
Q62087	Acaa1a	3-ketoacyl-CoA thiolase A, peroxisomal	THIKA_MOUSE	4.16795	6.83895e-07	7.14866e-06	2.86258e-05
Q8VDH1	Cpd	Carboxypeptidase D	CBPD_MOUSE	-inf	6.84906e-07	7.14866e-06	5.57828e-06
Q80ZU0	Ostf1	Osteoclast-stimulating factor 1	OSTF1_MOUSE	-inf	6.86178e-07	7.14866e-06	4.54708e-06
Q7TQK5	Aldh1b1	Aldehyde dehydrogenase X, mitochondrial	AL1B1_MOUSE	-inf	6.86934e-07	7.14866e-06	1.51265e-05
Q7TNV0	Cox7a1	Cytochrome c oxidase subunit 7A1, mitochondrial	CX7A1_MOUSE	-inf	6.8747e-07	7.14866e-06	0.000121297
Q8BVL9	Nras	GTPase NRas	RASN_MOUSE	-inf	6.87636e-07	7.14866e-06	3.16661e-05
Q8BNU0	Aida	Axin interactor, dorsalization-associated protein	AIDA_MOUSE	-inf	6.90776e-07	7.16079e-06	2.73381e-05
O08914	Taco1	Translational activator of cytochrome c oxidase 1	TACO1_MOUSE	-inf	6.91704e-07	7.16079e-06	1.14273e-05
Q91YH5	Mgll	Monoglyceride lipase	MGLL_MOUSE	-inf	6.92574e-07	7.16079e-06	1.62167e-05
Q8BK72	Fam185a	Protein FAM185A	F185A_MOUSE	-inf	6.98835e-07	7.20544e-06	1.68677e-05
Q68FH0	Vps4b	Vacuolar protein sorting-associated protein 4B	VPS4B_MOUSE	3.94602	6.99422e-07	7.20544e-06	0.000431388
Q7M750	Gjc2	Gap junction gamma-2 protein	CXG2_MOUSE	-inf	7.0462e-07	7.24588e-06	9.57694e-05
Q80YD1	Fcsk	L-fucose kinase	FCSK_MOUSE	-inf	7.0715e-07	7.2565e-06	1.97368e-05
Q80UM3	Hikeshi	Protein Hikeshi	HIKES_MOUSE	-inf	7.08738e-07	7.2565e-06	2.61081e-05
P26043	Nudt4	Diphosphoinositol polyphosphate phosphohydrolase 2	NUDT4_MOUSE	-inf	7.09473e-07	7.2565e-06	0.000165449
Q9CQE5	Atp6ap2	Renin receptor	RENR_MOUSE	-inf	7.13648e-07	7.28611e-06	2.19524e-05
Q9JJN6	Tomm20	Mitochondrial import receptor subunit TOM20 homolog	TOM20_MOUSE	-inf	7.15916e-07	7.29003e-06	7.11785e-06
Q9DB29	Slc25a51	Solute carrier family 25 member 51	S2551_MOUSE	-inf	7.1659e-07	7.29003e-06	3.45575e-05
Q8VC88	Septin2	Septin-2	SEPT2_MOUSE	-inf	7.19513e-07	7.30531e-06	1.2834e-05
P21619	Cisd2	CDGSH iron-sulfur domain-containing protein 2	CISD2_MOUSE	-inf	7.20658e-07	7.30531e-06	9.87669e-05
Q921S7	Lgi3	Leucine-rich repeat LGI family member 3	LGI3_MOUSE	-inf	7.2515e-07	7.33779e-06	1.69237e-05
O08528	Rbm39	RNA-binding protein 39	RBM39_MOUSE	-inf	7.31683e-07	7.38977e-06	0.000141328
Q8R313	Myl9	Myosin regulatory light polypeptide 9	MYL9_MOUSE	-inf	7.3288e-07	7.38977e-06	1.31184e-05
Q60603	Klhl22	Kelch-like protein 22	KLH22_MOUSE	-inf	7.35545e-07	7.39986e-06	3.89515e-06
Q8QZR5	Naa15	N-alpha-acetyltransferase 15, NatA auxiliary subunit	NAA15_MOUSE	-inf	7.36479e-07	7.39986e-06	1.41865e-05
Q8CGU1	Ech1	Delta(3,5)-Delta(2,4)-dienoyl-CoA isomerase, mitochondrial	ECH1_MOUSE	-inf	7.38259e-07	7.40469e-06	4.76332e-05
Q9JHL1	Coa3	Cytochrome c oxidase assembly factor 3 homolog, mitochondrial	COA3_MOUSE	-inf	7.43735e-07	7.4465e-06	1.5175e-05
Q3V4B5	Trappc1	Trafficking protein particle complex subunit 1	TPPC1_MOUSE	-inf	7.51973e-07	7.50891e-06	8.4815e-06
Q8BHC4	Dtd2	D-aminoacyl-tRNA deacylase 2	DTD2_MOUSE	-inf	7.52604e-07	7.50891e-06	1.86406e-05
Q9CQV7	Dnal1	Dynein light chain 1, axonemal	DNAL1_MOUSE	-inf	7.5826e-07	7.55211e-06	2.47672e-05
Q9D554	Efl1	Elongation factor-like GTPase 1	EFL1_MOUSE	-inf	7.60561e-07	7.56181e-06	2.42607e-05
Q9JHW2	Cpt1a	Carnitine O-palmitoyltransferase 1, liver isoform	CPT1A_MOUSE	-inf	7.66151e-07	7.59345e-06	6.62925e-05
Q8R035	Aldh18a1	Delta-1-pyrroline-5-carboxylate synthase	P5CS_MOUSE	-inf	7.67936e-07	7.59345e-06	2.05088e-05
P15388	Uck1	Uridine-cytidine kinase 1	UCK1_MOUSE	-inf	7.69153e-07	7.59345e-06	9.03569e-06
Q9Z0V2	Tomm22	Mitochondrial import receptor subunit TOM22 homolog	TOM22_MOUSE	-2.50671	7.69973e-07	7.59345e-06	4.932e-05
Q91YP0	Sars2	Serine--tRNA ligase, mitochondrial	SYSM_MOUSE	-inf	7.71872e-07	7.59345e-06	3.28188e-05
Q0KK59	Itm2b	Integral membrane protein 2B	ITM2B_MOUSE	-inf	7.72271e-07	7.59345e-06	5.53667e-05
Q3TIR1	Pls1	Plastin-1	PLSI_MOUSE	-inf	7.73919e-07	7.59345e-06	1.38229e-05
P50544	Snx14	Sorting nexin-14	SNX14_MOUSE	-inf	7.76496e-07	7.59345e-06	4.33498e-05
E9Q7G0	Gclm	Glutamate--cysteine ligase regulatory subunit	GSH0_MOUSE	-inf	7.76825e-07	7.59345e-06	1.55274e-05
Q9R1V4	Mccc2	Methylcrotonoyl-CoA carboxylase beta chain, mitochondrial	MCCB_MOUSE	-inf	7.78294e-07	7.59345e-06	3.14732e-05
Q9ER72	Cox17	Cytochrome c oxidase copper chaperone	COX17_MOUSE	-inf	7.79642e-07	7.59345e-06	2.32085e-05
Q924D0	Lingo1	Leucine-rich repeat and immunoglobulin-like domain-containing nogo receptor-interacting protein 1	LIGO1_MOUSE	-inf	7.80313e-07	7.59345e-06	3.33127e-05
Q8BX10	Pfdn1	Prefoldin subunit 1	PFD1_MOUSE	-inf	7.81859e-07	7.59345e-06	1.80112e-05
Q99N96	Plekhb1	Pleckstrin homology domain-containing family B member 1	PKHB1_MOUSE	-inf	7.8442e-07	7.59345e-06	6.67995e-06
Q91W29	Bckdha	2-oxoisovalerate dehydrogenase subunit alpha, mitochondrial	ODBA_MOUSE	-inf	7.84966e-07	7.59345e-06	1.18371e-05
Q8JZL3	Exosc6	Exosome complex component MTR3	EXOS6_MOUSE	-inf	7.8507e-07	7.59345e-06	9.91073e-06
Q9JI78	Pla2g15	Group XV phospholipase A2	PAG15_MOUSE	-inf	7.87785e-07	7.6034e-06	6.77947e-06
Q9Z2M6	Cpped1	Serine/threonine-protein phosphatase CPPED1	CPPED_MOUSE	-inf	7.88768e-07	7.6034e-06	1.09e-05
Q3TUH1	Glg1	Golgi apparatus protein 1	GSLG1_MOUSE	-inf	7.90519e-07	7.60741e-06	1.61651e-05
Q04899	Pde4dip	Myomegalin	MYOME_MOUSE	-inf	7.93269e-07	7.60757e-06	1.52971e-05
Q3TWW8	Abcb10	ATP-binding cassette sub-family B member 10, mitochondrial	ABCBA_MOUSE	-inf	7.94237e-07	7.60757e-06	2.04403e-05
Q99L85	Ndrg1	Protein NDRG1	NDRG1_MOUSE	-inf	7.95039e-07	7.60757e-06	1.27306e-05
P28667	Gns	N-acetylglucosamine-6-sulfatase	GNS_MOUSE	-inf	7.96271e-07	7.60757e-06	4.55982e-05
Q921H8	Slc43a2	Large neutral amino acids transporter small subunit 4	LAT4_MOUSE	-inf	7.9779e-07	7.60757e-06	7.08621e-05
Q7TSH8	Actr3b	Actin-related protein 3B	ARP3B_MOUSE	-inf	7.98548e-07	7.60757e-06	9.76098e-06
Q63829	Wasf2	Wiskott-Aldrich syndrome protein family member 2	WASF2_MOUSE	-inf	8.00697e-07	7.6105e-06	1.16847e-05
Q8JZN7	Mrpl48	39S ribosomal protein L48, mitochondrial	RM48_MOUSE	-inf	8.01528e-07	7.6105e-06	1.91588e-05
Q9CQZ1	Ak3	GTP:AMP phosphotransferase AK3, mitochondrial	KAD3_MOUSE	-inf	8.03885e-07	7.62019e-06	0.000147122
Q9JI39	Ftl1	Ferritin light chain 1	FRIL1_MOUSE	-inf	8.06062e-07	7.62813e-06	3.94445e-06
Q9WVL3	Ugp2	UTP--glucose-1-phosphate uridylyltransferase	UGPA_MOUSE	-inf	8.08855e-07	7.632e-06	1.68819e-05
Q6P6M7	Arhgef2	Rho guanine nucleotide exchange factor 2	ARHG2_MOUSE	-inf	8.0915e-07	7.632e-06	0.000371896
P61022	Atp13a1	Manganese-transporting ATPase 13A1	AT131_MOUSE	-inf	8.12532e-07	7.64242e-06	2.93517e-05
Q99KH8	Zadh2	Prostaglandin reductase-3	PTGR3_MOUSE	-inf	8.12938e-07	7.64242e-06	4.1836e-05
Q9D8N2	Aimp1	Aminoacyl tRNA synthase complex-interacting multifunctional protein 1	AIMP1_MOUSE	-inf	8.27791e-07	7.76923e-06	1.42154e-05
Q60649	Eif2s2	Eukaryotic translation initiation factor 2 subunit 2	IF2B_MOUSE	-inf	8.30319e-07	7.76967e-06	2.59723e-05
Q9DBR0	Ndufaf5	Arginine-hydroxylase NDUFAF5, mitochondrial	NDUF5_MOUSE	-inf	8.30566e-07	7.76967e-06	2.38215e-06
Q6PDQ2	Nudt10;Nudt11	Diphosphoinositol polyphosphate phosphohydrolase 3-alpha;Diphosphoinositol polyphosphate phosphohydrolase 3-beta	NUD10_MOUSE;NUD11_MOUSE	-inf	8.34017e-07	7.77657e-06	1.29205e-05
P28867	Thsd7a	Thrombospondin type-1 domain-containing protein 7A	THS7A_MOUSE	-inf	8.34033e-07	7.77657e-06	2.0376e-05
Q923D2	Slc12a7	Solute carrier family 12 member 7	S12A7_MOUSE	-inf	8.35764e-07	7.77998e-06	3.3925e-05
P21981	Mrpl55	39S ribosomal protein L55, mitochondrial	RM55_MOUSE	-inf	8.38393e-07	7.79172e-06	1.55803e-05
P62960	Tjp1	Tight junction protein ZO-1	ZO1_MOUSE	-inf	8.43497e-07	7.80413e-06	2.20437e-05
Q3UN90	44260	E3 ubiquitin-protein ligase MARCH5	MARH5_MOUSE	-inf	8.43639e-07	7.80413e-06	6.18506e-06
Q925F2	Arhgap26	Rho GTPase-activating protein 26	RHG26_MOUSE	-inf	8.43838e-07	7.80413e-06	4.29244e-06
Q9CZN8	Sf3b3	Splicing factor 3B subunit 3	SF3B3_MOUSE	-inf	8.46055e-07	7.80535e-06	1.11225e-05
Q14CH7	Snrpa	U1 small nuclear ribonucleoprotein A	SNRPA_MOUSE	-inf	8.46709e-07	7.80535e-06	3.80974e-06
Q00PI9	Atl2	Atlastin-2	ATLA2_MOUSE	-inf	8.48745e-07	7.81147e-06	7.59128e-05
P16332	Zyg11b	Protein zyg-11 homolog B	ZY11B_MOUSE	-inf	8.50306e-07	7.81321e-06	5.26644e-05
Q9WTU6	Shtn1	Shootin-1	SHOT1_MOUSE	-inf	8.56483e-07	7.85257e-06	4.412e-05
P35821	Commd2	COMM domain-containing protein 2	COMD2_MOUSE	-inf	8.58409e-07	7.85257e-06	7.93273e-06
P28741	Cdc42se2	CDC42 small effector protein 2	C42S2_MOUSE	-inf	8.58724e-07	7.85257e-06	1.30835e-05
Q8BZZ3	Smad4	Mothers against decapentaplegic homolog 4	SMAD4_MOUSE	-inf	8.64907e-07	7.89644e-06	1.18956e-05
O70591	Dhx15	Pre-mRNA-splicing factor ATP-dependent RNA helicase DHX15	DHX15_MOUSE	-inf	8.67526e-07	7.9073e-06	9.26355e-05
Q9JKY0	Mrpl39	39S ribosomal protein L39, mitochondrial	RM39_MOUSE	-inf	8.69904e-07	7.9073e-06	4.05765e-06
Q8VCW8	Heatr5b	HEAT repeat-containing protein 5B	HTR5B_MOUSE	-inf	8.7049e-07	7.9073e-06	5.24848e-05
P28650	Gng13	Guanine nucleotide-binding protein G(I)/G(S)/G(O) subunit gamma-13	GBG13_MOUSE	-inf	8.74559e-07	7.9073e-06	2.85813e-05
Q9JKL4	Elp4	Elongator complex protein 4	ELP4_MOUSE	-inf	8.75004e-07	7.9073e-06	2.74599e-05
Q9QYK9	Tspan5	Tetraspanin-5	TSN5_MOUSE	-inf	8.75515e-07	7.9073e-06	1.32806e-05
Q8BHL5	Adam9	Disintegrin and metalloproteinase domain-containing protein 9	ADAM9_MOUSE	-inf	8.75813e-07	7.9073e-06	2.46816e-05
Q9ER73	Exosc4	Exosome complex component RRP41	EXOS4_MOUSE	-inf	8.77328e-07	7.90844e-06	7.20784e-05
Q9JL56	Nmt1	Glycylpeptide N-tetradecanoyltransferase 1	NMT1_MOUSE	-inf	8.80013e-07	7.92011e-06	5.3682e-05
P55772	Cyb5a	Cytochrome b5	CYB5_MOUSE	-inf	8.83275e-07	7.93693e-06	5.47979e-06
O35604	Tbc1d17	TBC1 domain family member 17	TBC17_MOUSE	-inf	8.86874e-07	7.95672e-06	9.94757e-06
Q8K1N1	Sco1	Protein SCO1 homolog, mitochondrial	SCO1_MOUSE	-inf	8.98192e-07	8.04559e-06	2.12397e-05
Q8C163	Ubxn2b	UBX domain-containing protein 2B	UBX2B_MOUSE	-inf	9.0178e-07	8.06506e-06	4.55492e-05
Q9CQ06	Atg4c	Cysteine protease ATG4C	ATG4C_MOUSE	-inf	9.03774e-07	8.07022e-06	2.4213e-05
Q8BGP5	Gja1	Gap junction alpha-1 protein	CXA1_MOUSE	-inf	9.11631e-07	8.11461e-06	4.14998e-05
Q8K1R7	Gramd4	GRAM domain-containing protein 4	GRAM4_MOUSE	-inf	9.15123e-07	8.11461e-06	1.18451e-05
O55137	Bcs1l	Mitochondrial chaperone BCS1	BCS1_MOUSE	-inf	9.15401e-07	8.11461e-06	6.54223e-05
Q70IV5	Chchd1	Coiled-coil-helix-coiled-coil-helix domain-containing protein 1	CHCH1_MOUSE	-inf	9.15955e-07	8.11461e-06	2.12336e-06
Q9CWM4	Fam241b	Protein FAM241B	F241B_MOUSE	-inf	9.1702e-07	8.11461e-06	6.21122e-05
Q9ES74	Eif2b5	Translation initiation factor eIF-2B subunit epsilon	EI2BE_MOUSE	-inf	9.17825e-07	8.11461e-06	6.86404e-06
Q8CI75	Mvk	Mevalonate kinase	KIME_MOUSE	-inf	9.18892e-07	8.11461e-06	1.82357e-05
Q6GQU6	Cmc1	COX assembly mitochondrial protein homolog	COXM1_MOUSE	-inf	9.2099e-07	8.11461e-06	6.73744e-06
Q99N84	Kcnip3	Calsenilin,Calsenilin isoform 4	CSEN_MOUSE	-inf	9.21564e-07	8.11461e-06	7.19931e-06
Q9CQE8	H2afv;H2afz	Histone H2A.V;Histone H2A.Z	H2AV_MOUSE;H2AZ_MOUSE	-inf	9.23777e-07	8.12154e-06	2.5555e-05
Q8K268	Vps26c	Vacuolar protein sorting-associated protein 26C	VP26C_MOUSE	-inf	9.26162e-07	8.12927e-06	7.6261e-06
Q0VBD0	Dync1i1	Cytoplasmic dynein 1 intermediate chain 1	DC1I1_MOUSE	-inf	9.27511e-07	8.12927e-06	1.36851e-05
Q6PDG5	Impad1	Inositol monophosphatase 3	IMPA3_MOUSE	-inf	9.28989e-07	8.12972e-06	2.0544e-05
Q9WUN2	Coa7	Cytochrome c oxidase assembly factor 7	COA7_MOUSE	-inf	9.34969e-07	8.16951e-06	6.3152e-06
Q9JK23	H2afx	Histone H2AX	H2AX_MOUSE	-inf	9.36914e-07	8.17396e-06	7.54883e-06
Q08093	Kars1	Lysine--tRNA ligase	SYK_MOUSE	-inf	9.43449e-07	8.20864e-06	7.2463e-06
Q3U1F9	Ctsl	Cathepsin L1	CATL1_MOUSE	1.85227	9.44417e-07	8.20864e-06	1.67005e-05
Q8VD37	Nrdc	Nardilysin	NRDC_MOUSE	-1.83734	9.4819e-07	8.20864e-06	0.000221045
P42125	Cttnbp2	Cortactin-binding protein 2	CTTB2_MOUSE	-inf	9.49513e-07	8.20864e-06	7.00894e-05
Q8BSZ2	Brox	BRO1 domain-containing protein BROX	BROX_MOUSE	-inf	9.50299e-07	8.20864e-06	4.01389e-05
Q64253	Prpf8	Pre-mRNA-processing-splicing factor 8	PRP8_MOUSE	-inf	9.50855e-07	8.20864e-06	6.61891e-05
P49070	Pcyt1b	Choline-phosphate cytidylyltransferase B	PCY1B_MOUSE	-inf	9.50974e-07	8.20864e-06	9.08284e-06
Q4VA53	Coa6	Cytochrome c oxidase assembly factor 6 homolog	COA6_MOUSE	-inf	9.5366e-07	8.20956e-06	7.14076e-06
E9Q5C9	Bcap29	B-cell receptor-associated protein 29	BAP29_MOUSE	-inf	9.53964e-07	8.20956e-06	2.40028e-05
Q6KAU4	Ldah	Lipid droplet-associated hydrolase	LDAH_MOUSE	-inf	9.56132e-07	8.2097e-06	1.07145e-05
Q9CPW3	Them6	Protein THEM6	THEM6_MOUSE	-inf	9.57831e-07	8.2097e-06	5.74217e-06
P62077	Enpp5	Ectonucleotide pyrophosphatase/phosphodiesterase family member 5	ENPP5_MOUSE	-inf	9.58459e-07	8.2097e-06	5.02761e-05
Q8CFI7	Hmgcs2	Hydroxymethylglutaryl-CoA synthase, mitochondrial	HMCS2_MOUSE	-inf	9.60478e-07	8.2097e-06	4.56087e-06
Q9D5J6	Vps25	Vacuolar protein-sorting-associated protein 25	VPS25_MOUSE	-inf	9.62279e-07	8.2097e-06	2.69417e-06
Q9ER88	Srsf4	Serine/arginine-rich splicing factor 4	SRSF4_MOUSE	-inf	9.62626e-07	8.2097e-06	2.64516e-05
Q9D8Z2	Phkb	Phosphorylase b kinase regulatory subunit beta	KPBB_MOUSE	-inf	9.67497e-07	8.23023e-06	1.70798e-05
Q9WVJ5	Prkab2	5'-AMP-activated protein kinase subunit beta-2	AAKB2_MOUSE	-inf	9.67923e-07	8.23023e-06	4.99921e-06
Q9DBL2	Anp32b	Acidic leucine-rich nuclear phosphoprotein 32 family member B	AN32B_MOUSE	-inf	9.69487e-07	8.23125e-06	2.63123e-06
Q8R3S6	Kif3a	Kinesin-like protein KIF3A	KIF3A_MOUSE	-inf	9.72702e-07	8.24395e-06	2.99301e-05
Q9JI18	Tmem175	Endosomal/lysosomal potassium channel TMEM175	TM175_MOUSE	-inf	9.73877e-07	8.24395e-06	4.84262e-06
P08537	Oxa1l	Mitochondrial inner membrane protein OXA1L	OXA1L_MOUSE	-inf	9.87761e-07	8.34816e-06	0.000130481
Q9QZN4	Ntpcr	Cancer-related nucleoside-triphosphatase homolog	NTPCR_MOUSE	-inf	9.89118e-07	8.34816e-06	1.53729e-05
Q6EDY6	Sdk2	Protein sidekick-2	SDK2_MOUSE	-inf	9.91553e-07	8.35633e-06	3.34472e-06
P97820	Aldh9a1	4-trimethylaminobutyraldehyde dehydrogenase	AL9A1_MOUSE	-inf	9.94539e-07	8.36911e-06	4.63878e-06
O88935	Tmed4	Transmembrane emp24 domain-containing protein 4	TMED4_MOUSE	-2.2741	9.96171e-07	8.37048e-06	0.00274368
Q8BTZ7	Tmem94	Transmembrane protein 94	TMM94_MOUSE	-inf	9.98307e-07	8.37607e-06	4.40277e-05
Q3TC33	Bag1	BAG family molecular chaperone regulator 1	BAG1_MOUSE	-inf	1.00256e-06	8.3903e-06	2.29327e-05
Q99LM2	Gm2a	Ganglioside GM2 activator	SAP3_MOUSE	-inf	1.00295e-06	8.3903e-06	1.8182e-05
P70345	Snu13	NHP2-like protein 1	NH2L1_MOUSE	-inf	1.00785e-06	8.4065e-06	1.94368e-05
Q9CWX2	Snrpa1	U2 small nuclear ribonucleoprotein A'	RU2A_MOUSE	-inf	1.00917e-06	8.4065e-06	1.47068e-05
Q9WUR9	Mthfd2l	Probable bifunctional methylenetetrahydrofolate dehydrogenase/cyclohydrolase 2	MTD2L_MOUSE	-inf	1.00931e-06	8.4065e-06	9.66797e-05
Q99KR7	Septin6	Septin-6	SEPT6_MOUSE	-inf	1.01108e-06	8.40893e-06	3.93911e-05
Q07417	Echdc1	Ethylmalonyl-CoA decarboxylase	ECHD1_MOUSE	-inf	1.01461e-06	8.42597e-06	2.62623e-05
Q9JMK2	Hace1	E3 ubiquitin-protein ligase HACE1	HACE1_MOUSE	-inf	1.02751e-06	8.51953e-06	1.99828e-05
Q9R0N3	Papss1	Bifunctional 3'-phosphoadenosine 5'-phosphosulfate synthase 1	PAPS1_MOUSE	-inf	1.03014e-06	8.51953e-06	1.01643e-05
Q62433	Uevld	Ubiquitin-conjugating enzyme E2 variant 3	UEVLD_MOUSE	-inf	1.03036e-06	8.51953e-06	5.61297e-05
O54818	Itga6	Integrin alpha-6	ITA6_MOUSE	-inf	1.04597e-06	8.63606e-06	1.3506e-05
Q61578	Cbs	Cystathionine beta-synthase	CBS_MOUSE	-inf	1.04988e-06	8.65581e-06	6.97994e-06
Q8BYA0	Aifm3	Apoptosis-inducing factor 3	AIFM3_MOUSE	-inf	1.05296e-06	8.66865e-06	2.34854e-05
Q8BMD8	Lgi4	Leucine-rich repeat LGI family member 4	LGI4_MOUSE	-inf	1.05823e-06	8.69948e-06	5.98286e-06
Q9CQN7	Snta1	Alpha-1-syntrophin	SNTA1_MOUSE	-inf	1.06368e-06	8.73169e-06	9.05087e-06
Q60900	Prkcb	Protein kinase C beta type	KPCB_MOUSE	-inf	1.06666e-06	8.74092e-06	5.41308e-05
Q6DFW4	Edc4	Enhancer of mRNA-decapping protein 4	EDC4_MOUSE	-inf	1.06787e-06	8.74092e-06	2.027e-05
Q80X95	Diaph2	Protein diaphanous homolog 2	DIAP2_MOUSE	-inf	1.07154e-06	8.75831e-06	3.34549e-05
Q9JHG6	Stk24	Serine/threonine-protein kinase 24	STK24_MOUSE	-inf	1.07432e-06	8.76847e-06	2.81615e-05
Q9D1H8	Ephb2;EPHB2	Ephrin type-B receptor 2	EPHB2_MOUSE;EPHB2_HUMAN	-inf	1.07679e-06	8.77015e-06	7.87409e-06
Q14CH0	Mblac2	Metallo-beta-lactamase domain-containing protein 2	MBLC2_MOUSE	-inf	1.0776e-06	8.77015e-06	1.338e-05
P50114	Ttyh3	Protein tweety homolog 3	TTYH3_MOUSE	-3.4541	1.09056e-06	8.85588e-06	8.09782e-05
Q8BPG6	Slc25a42	Mitochondrial coenzyme A transporter SLC25A42	S2542_MOUSE	-inf	1.09429e-06	8.85588e-06	1.85375e-06
Q8K448	Hmgn2	Non-histone chromosomal protein HMG-17	HMGN2_MOUSE	-inf	1.09619e-06	8.85588e-06	2.62795e-06
P62274	Cnot1;CNOT1	CCR4-NOT transcription complex subunit 1	CNOT1_MOUSE;CNOT1_HUMAN	-inf	1.09636e-06	8.85588e-06	4.20014e-05
O88569	Gatc	Glutamyl-tRNA(Gln) amidotransferase subunit C, mitochondrial	GATC_MOUSE	-6.48589	1.09645e-06	8.85588e-06	0.000632217
Q62443	Coq8b	Atypical kinase COQ8B, mitochondrial	COQ8B_MOUSE	-inf	1.09746e-06	8.85588e-06	5.77298e-05
Q8K273	Cpne3	Copine-3	CPNE3_MOUSE	-inf	1.10233e-06	8.88256e-06	1.73475e-05
Q99N89	Snx19	Sorting nexin-19	SNX19_MOUSE	-inf	1.10574e-06	8.89747e-06	1.77127e-05
P43275	Cfl2	Cofilin-2	COF2_MOUSE	-inf	1.11207e-06	8.93578e-06	2.50141e-05
P52332	Rab33a	Ras-related protein Rab-33A	RB33A_MOUSE	-inf	1.11732e-06	8.96533e-06	2.59567e-06
Q80WM4	Stxbp6	Syntaxin-binding protein 6	STXB6_MOUSE	-inf	1.11914e-06	8.96728e-06	3.48683e-05
Q3KNM2	Adgrb2	Adhesion G protein-coupled receptor B2	AGRB2_MOUSE	-inf	1.12175e-06	8.97555e-06	1.82804e-05
Q569Z6	Epha6	Ephrin type-A receptor 6	EPHA6_MOUSE	-inf	1.12615e-06	8.99811e-06	3.21567e-05
Q8K2T1	Esyt2	Extended synaptotagmin-2	ESYT2_MOUSE	-inf	1.13372e-06	9.03901e-06	5.9473e-05
Q9D1I5	Timm8a1	Mitochondrial import inner membrane translocase subunit Tim8 A	TIM8A_MOUSE	-inf	1.13468e-06	9.03901e-06	2.08558e-05
P0DJF2	Nudt12	Peroxisomal NADH pyrophosphatase NUDT12	NUD12_MOUSE	-inf	1.13602e-06	9.03901e-06	8.07522e-06
Q61655	Snf8	Vacuolar-sorting protein SNF8	SNF8_MOUSE	-inf	1.14274e-06	9.06929e-06	1.99384e-05
Q8BTJ4	Mecp2	Methyl-CpG-binding protein 2	MECP2_MOUSE	-inf	1.14301e-06	9.06929e-06	6.92115e-06
Q9D8P4	Mrps36	28S ribosomal protein S36, mitochondrial	RT36_MOUSE	-inf	1.14626e-06	9.06963e-06	1.59788e-05
Q9QYB1	Rps29	40S ribosomal protein S29	RS29_MOUSE	-inf	1.1471e-06	9.06963e-06	9.41239e-05
Q8CE90	Snrnp200	U5 small nuclear ribonucleoprotein 200 kDa helicase	U520_MOUSE	-inf	1.14798e-06	9.06963e-06	2.02326e-05
Q9JKF7	Retreg3	Reticulophagy regulator 3	RETR3_MOUSE	-inf	1.14942e-06	9.06963e-06	1.45978e-05
Q9WU84	Ctnna3	Catenin alpha-3	CTNA3_MOUSE	-inf	1.15144e-06	9.07295e-06	6.89092e-06
Q6NXK7	Uap1l1	UDP-N-acetylhexosamine pyrophosphorylase-like protein 1	UAP1L_MOUSE	-3.1158	1.15356e-06	9.07715e-06	0.000212287
Q9QZE5	Ubac1	Ubiquitin-associated domain-containing protein 1	UBAC1_MOUSE	-inf	1.1577e-06	9.09716e-06	2.17037e-05
Q9D8V7	Pik3c3	Phosphatidylinositol 3-kinase catalytic subunit type 3	PK3C3_MOUSE	-inf	1.16002e-06	9.10194e-06	6.81698e-06
P21661	Borcs5	BLOC-1-related complex subunit 5	BORC5_MOUSE	-inf	1.16294e-06	9.10194e-06	1.61313e-05
Q6NXK8	Trappc2;TRAPPC2	Trafficking protein particle complex subunit 2	TPPC2_MOUSE;TPPC2_PIG	-inf	1.16542e-06	9.10194e-06	1.43558e-05
Q925H0	Clpb	Caseinolytic peptidase B protein homolog	CLPB_MOUSE	-inf	1.16725e-06	9.10194e-06	6.98006e-06
Q8BUR9	Atg2a	Autophagy-related protein 2 homolog A	ATG2A_MOUSE	-inf	1.16801e-06	9.10194e-06	5.55542e-06
Q9CQY6	Tdrkh	Tudor and KH domain-containing protein	TDRKH_MOUSE	-inf	1.16814e-06	9.10194e-06	4.56904e-05
Q9D6E4	Rfk	Riboflavin kinase	RIFK_MOUSE	-inf	1.17075e-06	9.10194e-06	5.93827e-06
Q9JHK4	Fibp	Acidic fibroblast growth factor intracellular-binding protein	FIBP_MOUSE	-inf	1.17109e-06	9.10194e-06	5.50456e-05
Q8VCR7	Hcn1	Potassium/sodium hyperpolarization-activated cyclic nucleotide-gated channel 1	HCN1_MOUSE	-inf	1.17356e-06	9.10776e-06	2.66413e-05
Q3TZZ7	Acta2	Actin, aortic smooth muscle	ACTA_MOUSE	-inf	1.17504e-06	9.10776e-06	9.85177e-06
Q9CQF0	Kctd16	BTB/POZ domain-containing protein KCTD16	KCD16_MOUSE	-inf	1.18168e-06	9.14682e-06	1.51633e-05
Q8CCB4	Dcps	m7GpppX diphosphatase	DCPS_MOUSE	-inf	1.18729e-06	9.16457e-06	3.42315e-05
Q62165	Lsm6	U6 snRNA-associated Sm-like protein LSm6	LSM6_MOUSE	-inf	1.18844e-06	9.16457e-06	1.60569e-05
Q8VDC0	Ndufaf1	Complex I intermediate-associated protein 30, mitochondrial	CIA30_MOUSE	-inf	1.19434e-06	9.16457e-06	1.88008e-05
Q9R0N0	Acbd5	Acyl-CoA-binding domain-containing protein 5	ACBD5_MOUSE	-inf	1.19452e-06	9.16457e-06	1.90298e-05
Q91W86	Ndufa12	NADH dehydrogenase [ubiquinone] 1 alpha subcomplex subunit 12	NDUAC_MOUSE	-inf	1.19476e-06	9.16457e-06	2.52071e-05
O35691	Ermp1	Endoplasmic reticulum metallopeptidase 1	ERMP1_MOUSE	-inf	1.19722e-06	9.16457e-06	1.03036e-05
Q99L27	Heph	Hephaestin	HEPH_MOUSE	-inf	1.19742e-06	9.16457e-06	1.93774e-05
Q9CQ10	Tcea1	Transcription elongation factor A protein 1	TCEA1_MOUSE	-inf	1.19805e-06	9.16457e-06	2.84406e-05
Q61908	Hm13	Minor histocompatibility antigen H13	HM13_MOUSE	-inf	1.19929e-06	9.16457e-06	1.68156e-05
Q91ZJ5	Selenbp1	Methanethiol oxidase	SBP1_MOUSE	-inf	1.20166e-06	9.16457e-06	8.28104e-05
Q3URE1	Mrrf	Ribosome-recycling factor, mitochondrial	RRFM_MOUSE	-inf	1.20167e-06	9.16457e-06	2.71286e-05
Q9QYF1	Ncbp1	Nuclear cap-binding protein subunit 1	NCBP1_MOUSE	-inf	1.20499e-06	9.17638e-06	1.28843e-05
Q8BGY2	Mcat	Malonyl-CoA-acyl carrier protein transacylase, mitochondrial	FABD_MOUSE	-inf	1.20644e-06	9.17638e-06	8.11399e-06
Q8R3R8	Daam1	Disheveled-associated activator of morphogenesis 1	DAAM1_MOUSE	-inf	1.21195e-06	9.19521e-06	3.56298e-05
Q9D0D3	Aif1l	Allograft inflammatory factor 1-like	AIF1L_MOUSE	-inf	1.21546e-06	9.19521e-06	2.58886e-06
Q9D1B9	Lamtor5	Ragulator complex protein LAMTOR5	LTOR5_MOUSE	-inf	1.21792e-06	9.19521e-06	1.39347e-05
Q8BYP3	Gpx1	Glutathione peroxidase 1	GPX1_MOUSE	-inf	1.218e-06	9.19521e-06	5.5587e-06
Q9CQA6	Vwa8	von Willebrand factor A domain-containing protein 8	VWA8_MOUSE	-inf	1.21862e-06	9.19521e-06	9.51099e-06
Q9CQV4	Dtnb	Dystrobrevin beta	DTNB_MOUSE	-inf	1.21911e-06	9.19521e-06	1.4264e-05
Q6ZQI3	Ccdc51	Coiled-coil domain-containing protein 51	CCD51_MOUSE	3.56576	1.22023e-06	9.19521e-06	0.000318202
Q8BL86	Lyrm7	Complex III assembly factor LYRM7	LYRM7_MOUSE	-inf	1.22183e-06	9.19521e-06	2.61777e-05
O35683	Dmwd	Dystrophia myotonica WD repeat-containing protein	DMWD_MOUSE	-inf	1.22355e-06	9.19598e-06	0.000144681
Q9CQL5	Creg2	Protein CREG2	CREG2_MOUSE	-inf	1.22555e-06	9.1989e-06	1.53401e-05
Q9CXI0	Tub	Tubby protein	TUB_MOUSE	-inf	1.2295e-06	9.21639e-06	1.55991e-05
Q60936	Pik3r1	Phosphatidylinositol 3-kinase regulatory subunit alpha	P85A_MOUSE	-inf	1.23322e-06	9.23211e-06	1.73635e-05
Q9QZX7	Adi1	1,2-dihydroxy-3-keto-5-methylthiopentene dioxygenase	MTND_MOUSE	-3.07669	1.23609e-06	9.23316e-06	0.000119695
P62862	Nudt16	U8 snoRNA-decapping enzyme	NUD16_MOUSE	-inf	1.2381e-06	9.23316e-06	6.27433e-05
Q9D6R2	Sec13	Protein SEC13 homolog	SEC13_MOUSE	-2.2784	1.23822e-06	9.23316e-06	0.00188476
Q8BML9	Luc7l3	Luc7-like protein 3	LC7L3_MOUSE	-inf	1.24123e-06	9.24354e-06	2.1973e-05
Q8BPM0	Gstt1	Glutathione S-transferase theta-1	GSTT1_MOUSE	-inf	1.24291e-06	9.24393e-06	1.57369e-05
P50580	Cherp	Calcium homeostasis endoplasmic reticulum protein	CHERP_MOUSE	-inf	1.24752e-06	9.26159e-06	6.39727e-05
P14576	Nhp2	H/ACA ribonucleoprotein complex subunit 2	NHP2_MOUSE	-inf	1.24853e-06	9.26159e-06	4.6168e-05
Q9D7N9	F3	Tissue factor	TF_MOUSE	-inf	1.25479e-06	9.29585e-06	6.10485e-05
Q7TPV4	Tenm1	Teneurin-1	TEN1_MOUSE	-inf	1.25749e-06	9.30376e-06	1.29181e-05
P29533	Hnrnpul2	Heterogeneous nuclear ribonucleoprotein U-like protein 2	HNRL2_MOUSE	-inf	1.26421e-06	9.33236e-06	1.25025e-05
Q60648	Banf1	Barrier-to-autointegration factor	BAF_MOUSE	-inf	1.26463e-06	9.33236e-06	8.89984e-06
C0HK79	Phf5a	PHD finger-like domain-containing protein 5A	PHF5A_MOUSE	-inf	1.26998e-06	9.35976e-06	1.14574e-05
Q8R5L3	Snrpc	U1 small nuclear ribonucleoprotein C	RU1C_MOUSE	-inf	1.27523e-06	9.38631e-06	1.47281e-05
Q8BJ71	Mvb12b	Multivesicular body subunit 12B	MB12B_MOUSE	-inf	1.2808e-06	9.41064e-06	2.5466e-05
P59235	Rpa3	Replication protein A 14 kDa subunit	RFA3_MOUSE	-inf	1.28184e-06	9.41064e-06	6.72833e-06
Q3ULD5	Numa1	Nuclear mitotic apparatus protein 1	NUMA1_MOUSE	-inf	1.28381e-06	9.41295e-06	5.26926e-05
Q8CBF3	Mad1l1	Mitotic spindle assembly checkpoint protein MAD1	MD1L1_MOUSE	-inf	1.28546e-06	9.41295e-06	1.90127e-05
Q9JHR9	Mrpl32	39S ribosomal protein L32, mitochondrial	RM32_MOUSE	-inf	1.29484e-06	9.46947e-06	1.6613e-05
Q9Z110	Svip	Small VCP/p97-interacting protein	SVIP_MOUSE	-inf	1.30216e-06	9.51079e-06	4.20725e-05
O35459	Mrps18a	28S ribosomal protein S18a, mitochondrial	RT18A_MOUSE	-inf	1.30644e-06	9.5298e-06	3.5702e-05
Q9CPW4	Arfgef2	Brefeldin A-inhibited guanine nucleotide-exchange protein 2	BIG2_MOUSE	-inf	1.31239e-06	9.55194e-06	0.00015953
Q3UFS0	Kdsr	3-ketodihydrosphingosine reductase	KDSR_MOUSE	-inf	1.31283e-06	9.55194e-06	5.22308e-06
Q8CFI5	Kcnc1	Potassium voltage-gated channel subfamily C member 1	KCNC1_MOUSE	-inf	1.31556e-06	9.55962e-06	1.22005e-05
Q9R112	Metap2	Methionine aminopeptidase 2	MAP2_MOUSE	-inf	1.31927e-06	9.57121e-06	1.11214e-05
Q99M71	Scyl2	SCY1-like protein 2	SCYL2_MOUSE	-inf	1.32156e-06	9.57121e-06	7.99326e-05
Q9D8T7	Arcn1	Coatomer subunit delta	COPD_MOUSE	-inf	1.32219e-06	9.57121e-06	1.74582e-05
Q8R3F5	Ufsp1	Ufm1-specific protease 1	UFSP1_MOUSE	-inf	1.32581e-06	9.58517e-06	1.5894e-05
O54833	Twf2	Twinfilin-2	TWF2_MOUSE	-inf	1.32961e-06	9.60046e-06	3.09065e-05
Q5SNZ0	RPS6KA	Ribosomal protein S6 kinase 2 alpha	KS6AA_CHICK	-inf	1.33798e-06	9.61401e-06	6.08524e-06
Q08274	Bzw1	Basic leucine zipper and W2 domain-containing protein 1	BZW1_MOUSE	-inf	1.33864e-06	9.61401e-06	2.74314e-05
Q8BPB0	Septin9	Septin-9	SEPT9_MOUSE	-inf	1.33893e-06	9.61401e-06	6.46702e-06
Q9ER39	Bin2	Bridging integrator 2	BIN2_MOUSE	-inf	1.33975e-06	9.61401e-06	4.24191e-06
Q99NB1	Nono	Non-POU domain-containing octamer-binding protein	NONO_MOUSE	-inf	1.33992e-06	9.61401e-06	2.03218e-05
Q80Y17	Calcoco1	Calcium-binding and coiled-coil domain-containing protein 1	CACO1_MOUSE	-inf	1.3424e-06	9.61966e-06	4.72152e-05
O55143	Aif1	Allograft inflammatory factor 1	AIF1_MOUSE	-2.19788	1.34706e-06	9.64098e-06	0.00091177
Q7TNF0	Rbbp4	Histone-binding protein RBBP4	RBBP4_MOUSE	-inf	1.34952e-06	9.64648e-06	2.75458e-05
O35099	Rcan1	Calcipressin-1	RCAN1_MOUSE	-inf	1.35123e-06	9.64657e-06	4.51047e-06
P53995	Gdpgp1	GDP-D-glucose phosphorylase 1	GDPP1_MOUSE	-inf	1.35837e-06	9.68537e-06	6.73007e-06
Q8K479	K-RAS	GTPase KRas	RASK_MSVKI	-inf	1.36813e-06	9.74282e-06	3.2798e-06
Q9QX47	Mrpl23	39S ribosomal protein L23, mitochondrial	RM23_MOUSE	-inf	1.3717e-06	9.75603e-06	1.35998e-05
Q62507	Mrps25	28S ribosomal protein S25, mitochondrial	RT25_MOUSE	-inf	1.37398e-06	9.76002e-06	7.89103e-06
Q80ZI6	Th	Tyrosine 3-monooxygenase	TY3H_MOUSE	2.58549	1.37773e-06	9.77453e-06	1.66588e-05
P97449	Macrod2	ADP-ribose glycohydrolase MACROD2	MACD2_MOUSE	-inf	1.38045e-06	9.78163e-06	7.76497e-06
P56394	S100a16	Protein S100-A16	S10AG_MOUSE	-inf	1.3836e-06	9.79175e-06	1.86046e-05
O88738	Acy1	Aminoacylase-1	ACY1_MOUSE	-inf	1.38753e-06	9.79184e-06	4.94061e-06
P62082	Clcn4	H(+)/Cl(-) exchange transporter 4	CLCN4_MOUSE	-inf	1.38763e-06	9.79184e-06	0.000162136
Q8VDP3	Rps28	40S ribosomal protein S28	RS28_MOUSE	-inf	1.38877e-06	9.79184e-06	2.38179e-06
P62309	Csnk1d	Casein kinase I isoform delta	KC1D_MOUSE	-inf	1.39321e-06	9.811e-06	5.09449e-05
Q9JIA1	Rcc1	Regulator of chromosome condensation	RCC1_MOUSE	-3.483	1.4158e-06	9.95371e-06	0.000322845
P83940	Csnk1g3	Casein kinase I isoform gamma-3	KC1G3_MOUSE	-inf	1.41697e-06	9.95371e-06	5.96351e-05
Q8BIG7	Asah2	Neutral ceramidase	ASAH2_MOUSE	-inf	1.42163e-06	9.97271e-06	4.12391e-05
Q8CGC6	Nudt9	ADP-ribose pyrophosphatase, mitochondrial	NUDT9_MOUSE	-inf	1.42383e-06	9.97271e-06	2.9627e-06
Q0V8T9	Nudt5	ADP-sugar pyrophosphatase	NUDT5_MOUSE	-inf	1.42747e-06	9.97271e-06	7.13444e-06
Q8BGV8	Higd1a	HIG1 domain family member 1A, mitochondrial	HIG1A_MOUSE	-inf	1.42752e-06	9.97271e-06	5.76106e-06
O54941	Dcxr	L-xylulose reductase	DCXR_MOUSE	-inf	1.42898e-06	9.97271e-06	1.06859e-05
Q99N91	Atp2c1	Calcium-transporting ATPase type 2C member 1	AT2C1_MOUSE	-inf	1.43017e-06	9.97271e-06	1.50159e-05
Q9JLT4	Wwp1	NEDD4-like E3 ubiquitin-protein ligase WWP1	WWP1_MOUSE	-inf	1.44061e-06	1.00332e-05	3.08351e-05
Q60738	Mrpl40	39S ribosomal protein L40, mitochondrial	RM40_MOUSE	-inf	1.45462e-06	1.011e-05	2.94117e-05
Q9ERI6	Spag1	Sperm-associated antigen 1	SPAG1_MOUSE	-inf	1.45518e-06	1.011e-05	6.14972e-05
Q8BYI6	Myo6	Unconventional myosin-VI	MYO6_MOUSE	-inf	1.46045e-06	1.01342e-05	3.42894e-06
Q8BZ81	Ago3	Protein argonaute-3	AGO3_MOUSE	-inf	1.46572e-06	1.01476e-05	3.86698e-06
Q9ESN4	Samd4a	Protein Smaug homolog 1	SMAG1_MOUSE	-inf	1.46844e-06	1.01476e-05	2.21721e-05
Q9DCS3	Gucy1a1	Guanylate cyclase soluble subunit alpha-1	GCYA1_MOUSE	-inf	1.46905e-06	1.01476e-05	4.51187e-05
P17047	Tubgcp3	Gamma-tubulin complex component 3	GCP3_MOUSE	-inf	1.47269e-06	1.01476e-05	1.83381e-05
Q80U95	Dctn6	Dynactin subunit 6	DCTN6_MOUSE	-inf	1.47332e-06	1.01476e-05	1.86509e-05
Q6NS82	Acp2	Lysosomal acid phosphatase	PPAL_MOUSE	-inf	1.4739e-06	1.01476e-05	2.13393e-05
Q6P3A8	Als2	Alsin	ALS2_MOUSE	-inf	1.47484e-06	1.01476e-05	2.17475e-05
Q921M7	Trmu	Mitochondrial tRNA-specific 2-thiouridylase 1	MTU1_MOUSE	-inf	1.48331e-06	1.01778e-05	0.000241413
Q7SIG6	Map2k2	Dual specificity mitogen-activated protein kinase kinase 2	MP2K2_MOUSE	11.5462	1.48351e-06	1.01778e-05	0.0197998
Q6PDC0	Rdh14	Retinol dehydrogenase 14	RDH14_MOUSE	-inf	1.4846e-06	1.01778e-05	5.88166e-06
P57774	Cbarp	Voltage-dependent calcium channel beta subunit-associated regulatory protein	CBARP_MOUSE	-inf	1.49366e-06	1.02276e-05	3.25067e-05
Q921W4	Impdh2	Inosine-5'-monophosphate dehydrogenase 2	IMDH2_MOUSE	-inf	1.49615e-06	1.02324e-05	1.74648e-05
Q3TWL2	Dnajc24	DnaJ homolog subfamily C member 24	DJC24_MOUSE	-inf	1.49867e-06	1.02359e-05	1.73785e-05
P32067	Rab15	Ras-related protein Rab-15	RAB15_MOUSE	-inf	1.50026e-06	1.02359e-05	7.63846e-05
Q3TC93	Nt5dc3	5'-nucleotidase domain-containing protein 3	NT5D3_MOUSE	-inf	1.50642e-06	1.0261e-05	4.55889e-06
Q8VHY0	Mrpl24	39S ribosomal protein L24, mitochondrial	RM24_MOUSE	-inf	1.50755e-06	1.0261e-05	3.78448e-05
P84104	Scpep1	Retinoid-inducible serine carboxypeptidase	RISC_MOUSE	-inf	1.51484e-06	1.02968e-05	0.000256212
Q9JI99	Tax1bp3	Tax1-binding protein 3	TX1B3_MOUSE	-inf	1.51642e-06	1.02968e-05	3.50068e-06
Q8CHG3	Pcbd2	Pterin-4-alpha-carbinolamine dehydratase 2	PHS2_MOUSE	-inf	1.51833e-06	1.02975e-05	2.88355e-06
Q8C1Y8	Cbr4	Carbonyl reductase family member 4	CBR4_MOUSE	-inf	1.52722e-06	1.03455e-05	1.32301e-05
Q9QXG2	Itpripl2	Inositol 1,4,5-trisphosphate receptor-interacting protein-like 2	IPIL2_MOUSE	-inf	1.5354e-06	1.03776e-05	1.45159e-05
Q6ZPZ3	Fmnl2	Formin-like protein 2	FMNL2_MOUSE	-inf	1.53654e-06	1.03776e-05	3.80961e-06
Q8BZ36	Ccdc93	Coiled-coil domain-containing protein 93	CCD93_MOUSE	-inf	1.5378e-06	1.03776e-05	2.62956e-06
P35922	Sf3a3	Splicing factor 3A subunit 3	SF3A3_MOUSE	-inf	1.53925e-06	1.03776e-05	8.67322e-06
Q9ES89	Blvrb	Flavin reductase (NADPH)	BLVRB_MOUSE	-inf	1.54219e-06	1.03852e-05	1.07116e-05
Q9WVC3	Mthfd1l	Monofunctional C1-tetrahydrofolate synthase, mitochondrial	C1TM_MOUSE	-inf	1.54424e-06	1.03867e-05	2.8874e-06
Q9CQC7	Kcnc3	Potassium voltage-gated channel subfamily C member 3	KCNC3_MOUSE	-inf	1.54981e-06	1.04119e-05	0.000273193
Q9JHQ5	Rae1	mRNA export factor	RAE1L_MOUSE	-inf	1.55444e-06	1.04307e-05	1.85145e-05
P49769	Acot1	Acyl-coenzyme A thioesterase 1	ACOT1_MOUSE	-inf	1.5569e-06	1.04349e-05	5.86132e-06
Q8CBG9	Cog5	Conserved oligomeric Golgi complex subunit 5	COG5_MOUSE	-inf	1.56508e-06	1.04774e-05	9.76727e-06
Q9Z2D6	Stx18	Syntaxin-18	STX18_MOUSE	-inf	1.5692e-06	1.04926e-05	8.61692e-05
Q9D154	Hk2	Hexokinase-2	HXK2_MOUSE	-inf	1.57517e-06	1.05202e-05	5.24777e-05
Q9JIP6	Nhlrc2	NHL repeat-containing protein 2	NHLC2_MOUSE	-inf	1.57963e-06	1.05336e-05	7.59314e-06
P56392	Agfg2	Arf-GAP domain and FG repeat-containing protein 2	AGFG2_MOUSE	-inf	1.58436e-06	1.05336e-05	9.92259e-06
Q99KR3	Dnaja4	DnaJ homolog subfamily A member 4	DNJA4_MOUSE	-inf	1.58443e-06	1.05336e-05	7.18769e-06
P70408	Ndufb3	NADH dehydrogenase [ubiquinone] 1 beta subcomplex subunit 3	NDUB3_MOUSE	-inf	1.58488e-06	1.05336e-05	1.40319e-05
Q922R8	Phyhip	Phytanoyl-CoA hydroxylase-interacting protein	PHYIP_MOUSE	2.41067	1.58642e-06	1.05336e-05	0.000333161
P62874	Spryd7	SPRY domain-containing protein 7	SPRY7_MOUSE	-3.22556	1.59311e-06	1.05603e-05	0.00260261
Q922J9	Niban2	Protein Niban 2	NIBA2_MOUSE	-inf	1.59415e-06	1.05603e-05	4.36836e-06
Q9CY57	Fkbp3	Peptidyl-prolyl cis-trans isomerase FKBP3	FKBP3_MOUSE	-inf	1.59662e-06	1.05644e-05	1.73303e-05
Q62422	Adss1	Adenylosuccinate synthetase isozyme 1	PURA1_MOUSE	-inf	1.60098e-06	1.05809e-05	8.23361e-06
O55013	Paqr4	Progestin and adipoQ receptor family member 4	PAQR4_MOUSE	-inf	1.61129e-06	1.06367e-05	9.97037e-05
O35855	Micos10	MICOS complex subunit Mic10	MIC10_MOUSE	-inf	1.61554e-06	1.06463e-05	1.35131e-05
Q91WK2	Ndufa1	NADH dehydrogenase [ubiquinone] 1 alpha subcomplex subunit 1	NDUA1_MOUSE	-inf	1.61648e-06	1.06463e-05	2.57523e-05
Q9D428	Scg5	Neuroendocrine protein 7B2	7B2_MOUSE	-inf	1.62462e-06	1.06876e-05	1.01304e-05
Q9DCA7	Atl3	Atlastin-3	ATLA3_MOUSE	-inf	1.62851e-06	1.07008e-05	5.80367e-06
Q9R171	Lemd2	LEM domain-containing protein 2	LEMD2_MOUSE	-inf	1.6419e-06	1.07651e-05	1.2873e-05
Q5FWH7	Commd9	COMM domain-containing protein 9	COMD9_MOUSE	-inf	1.64251e-06	1.07651e-05	1.42653e-05
Q8JZW5	Coq9	Ubiquinone biosynthesis protein COQ9, mitochondrial	COQ9_MOUSE	-inf	1.64472e-06	1.07651e-05	5.16069e-05
Q8R104	Hmgcl	Hydroxymethylglutaryl-CoA lyase, mitochondrial	HMGCL_MOUSE	-inf	1.64585e-06	1.07651e-05	6.4989e-06
P0C0A3	Rangap1	Ran GTPase-activating protein 1	RAGP1_MOUSE	-inf	1.64811e-06	1.07675e-05	4.81678e-05
Q8VI75	Sdhaf1	Succinate dehydrogenase assembly factor 1, mitochondrial	SDHF1_MOUSE	-inf	1.65746e-06	1.07699e-05	1.81055e-05
Q8BGF8	Cpne5	Copine-5	CPNE5_MOUSE	-inf	1.65877e-06	1.07699e-05	1.04027e-05
Q6PF93	Ankrd13d	Ankyrin repeat domain-containing protein 13D	AN13D_MOUSE	-inf	1.65946e-06	1.07699e-05	1.75944e-05
Q9Z1Q9	Acp6	Lysophosphatidic acid phosphatase type 6	PPA6_MOUSE	-inf	1.65966e-06	1.07699e-05	3.99307e-05
Q8VDI7	Map2k7	Dual specificity mitogen-activated protein kinase kinase 7	MP2K7_MOUSE	-inf	1.66092e-06	1.07699e-05	8.09274e-06
P59708	Efhd1	EF-hand domain-containing protein D1	EFHD1_MOUSE	-inf	1.66153e-06	1.07699e-05	1.74363e-05
P62137	Clpx;CLPX	ATP-dependent Clp protease ATP-binding subunit clpX-like, mitochondrial;ATP-dependent Clp protease ATP-binding subunit clpX-like, mitochondrial	CLPX_MOUSE;CLPX_HUMAN	-2.03343	1.6617e-06	1.07699e-05	0.000227533
Q3TWN3	Spns1	Protein spinster homolog 1	SPNS1_MOUSE	-inf	1.66631e-06	1.07875e-05	1.09597e-05
E9Q735	Pam16	Mitochondrial import inner membrane translocase subunit TIM16	TIM16_MOUSE	-inf	1.678e-06	1.08508e-05	1.10791e-05
Q91VD9	Gusb	Beta-glucuronidase	BGLR_MOUSE	-1.27151	1.69188e-06	1.09207e-05	0.000844993
Q9R049	Gnai1	Guanine nucleotide-binding protein G(i) subunit alpha-1	GNAI1_MOUSE	-inf	1.69265e-06	1.09207e-05	6.77247e-06
Q9Z0N1	Capg	Macrophage-capping protein	CAPG_MOUSE	-inf	1.70062e-06	1.09598e-05	2.50167e-05
Q91WK0	Armcx3	Armadillo repeat-containing X-linked protein 3	ARMX3_MOUSE	-inf	1.70328e-06	1.09645e-05	8.49534e-06
O35075	Spock2	Testican-2	TICN2_MOUSE	-inf	1.70558e-06	1.09669e-05	5.76814e-06
P26231	Pdcd4	Programmed cell death protein 4	PDCD4_MOUSE	-inf	1.71148e-06	1.09838e-05	0.000147167
Q8K2Q5	Larp6	La-related protein 6	LARP6_MOUSE	-inf	1.71491e-06	1.09838e-05	2.32696e-05
Q8CBY0	Macrod1	ADP-ribose glycohydrolase MACROD1	MACD1_MOUSE	-inf	1.71877e-06	1.09838e-05	1.20815e-05
Q9CZN7	Camk1d	Calcium/calmodulin-dependent protein kinase type 1D	KCC1D_MOUSE	-inf	1.7191e-06	1.09838e-05	1.95541e-05
Q8CI32	Ago2	Protein argonaute-2	AGO2_MOUSE	-inf	1.71954e-06	1.09838e-05	4.59313e-05
Q9JKL5	Slc25a20	Mitochondrial carnitine/acylcarnitine carrier protein	MCAT_MOUSE	-inf	1.72122e-06	1.09838e-05	3.90765e-05
O55057	Gal	Galanin peptides	GALA_MOUSE	-inf	1.72655e-06	1.09838e-05	2.10979e-05
Q9DB50	Ptpmt1	Phosphatidylglycerophosphatase and protein-tyrosine phosphatase 1	PTPM1_MOUSE	-inf	1.72737e-06	1.09838e-05	1.017e-05
Q8VE70	Nat8l	N-acetylaspartate synthetase	NAT8L_MOUSE	-inf	1.72876e-06	1.09838e-05	4.43726e-05
P62858	Msrb2	Methionine-R-sulfoxide reductase B2, mitochondrial	MSRB2_MOUSE	-inf	1.72932e-06	1.09838e-05	0.00012449
O88455	Rgs10	Regulator of G-protein signaling 10	RGS10_MOUSE	-inf	1.72942e-06	1.09838e-05	1.26145e-05
P97952	Tmem223	Transmembrane protein 223	TM223_MOUSE	-inf	1.73473e-06	1.10053e-05	5.19711e-05
P54731	Akr1b1	Aldo-keto reductase family 1 member B1	ALDR_MOUSE	-inf	1.7391e-06	1.10208e-05	5.0534e-06
Q8K010	Metap1	Methionine aminopeptidase 1	MAP11_MOUSE	-inf	1.75169e-06	1.10882e-05	1.41391e-05
Q8BHE8	Timmdc1	Complex I assembly factor TIMMDC1, mitochondrial	TIDC1_MOUSE	-inf	1.7544e-06	1.1093e-05	2.40487e-05
Q61234	Rem2	GTP-binding protein REM 2	REM2_MOUSE	-inf	1.7687e-06	1.1171e-05	4.02749e-05
B2RXS4	Nrn1	Neuritin	NRN1_MOUSE	-inf	1.78547e-06	1.12645e-05	1.53968e-05
Q4PJX1	Gga1	ADP-ribosylation factor-binding protein GGA1	GGA1_MOUSE	-inf	1.79124e-06	1.12877e-05	5.16047e-06
Q8CFV4	Sf3b5	Splicing factor 3B subunit 5	SF3B5_MOUSE	-inf	1.79311e-06	1.12877e-05	5.52005e-05
P23927	Exoc7	Exocyst complex component 7	EXOC7_MOUSE	-inf	1.80288e-06	1.13249e-05	9.56317e-05
Q8R0H9	Mdk	Midkine	MK_MOUSE	-inf	1.80307e-06	1.13249e-05	3.61068e-05
P51791	Poldip2	Polymerase delta-interacting protein 2	PDIP2_MOUSE	-inf	1.80682e-06	1.13249e-05	1.62754e-05
P0CW02	Ntrk3	NT-3 growth factor receptor	NTRK3_MOUSE	-inf	1.80698e-06	1.13249e-05	1.92449e-05
P61963	Zw10	Centromere/kinetochore protein zw10 homolog	ZW10_MOUSE	-inf	1.8137e-06	1.13545e-05	2.49541e-05
Q61739	Sh3gl3	Endophilin-A3	SH3G3_MOUSE	-inf	1.81779e-06	1.13615e-05	4.47607e-06
Q922D8	Nptxr	Neuronal pentraxin receptor	NPTXR_MOUSE	-1.9259	1.81879e-06	1.13615e-05	8.79761e-05
Q9D273	Cul4b	Cullin-4B	CUL4B_MOUSE	-inf	1.83647e-06	1.14539e-05	5.0776e-05
Q61418	Rbms3	RNA-binding motif, single-stranded-interacting protein 3	RBMS3_MOUSE	-inf	1.83761e-06	1.14539e-05	8.07685e-06
Q61672	Hdac11	Histone deacetylase 11	HDA11_MOUSE	-inf	1.86851e-06	1.16317e-05	1.13509e-05
Q99JW2	Ptcd3	Pentatricopeptide repeat domain-containing protein 3, mitochondrial	PTCD3_MOUSE	-inf	1.87117e-06	1.16317e-05	3.48349e-05
O70551	Psmg1	Proteasome assembly chaperone 1	PSMG1_MOUSE	-inf	1.87587e-06	1.16317e-05	2.8216e-06
Q6PDN3	Fam171b	Protein FAM171B	F171B_MOUSE	-inf	1.87692e-06	1.16317e-05	8.38108e-06
Q9CQI7	Nae1	NEDD8-activating enzyme E1 regulatory subunit	ULA1_MOUSE	-inf	1.87818e-06	1.16317e-05	1.67586e-05
Q8BW96	Ggt1	Glutathione hydrolase 1 proenzyme	GGT1_MOUSE	-inf	1.87838e-06	1.16317e-05	5.7235e-05
Q6WQJ1	Sord	Sorbitol dehydrogenase	DHSO_MOUSE	-inf	1.88208e-06	1.16419e-05	1.58308e-05
P84089	Iars	Isoleucine--tRNA ligase, cytoplasmic	SYIC_MOUSE	-inf	1.89067e-06	1.16824e-05	0.000113493
Q9EQG7	Shmt2	Serine hydroxymethyltransferase, mitochondrial	GLYM_MOUSE	-inf	1.91707e-06	1.18326e-05	5.30952e-06
Q3TCH7	Plpp1	Phospholipid phosphatase 1	PLPP1_MOUSE	-inf	1.92248e-06	1.18532e-05	1.95961e-05
Q50H33	Phka1	Phosphorylase b kinase regulatory subunit alpha, skeletal muscle isoform	KPB1_MOUSE	-inf	1.92658e-06	1.18656e-05	2.35094e-05
Q9CU62	Rps27a	Ubiquitin-40S ribosomal protein S27a	RS27A_MOUSE	-inf	1.93028e-06	1.18756e-05	9.05225e-06
Q8JZS9	Kif1b	Kinesin-like protein KIF1B	KIF1B_MOUSE	-inf	1.93455e-06	1.1889e-05	1.2148e-05
P70698	Anks1b	Ankyrin repeat and sterile alpha motif domain-containing protein 1B	ANS1B_MOUSE	-inf	1.94914e-06	1.19658e-05	4.03451e-05
Q99J47	Eif3c	Eukaryotic translation initiation factor 3 subunit C	EIF3C_MOUSE	-inf	1.95293e-06	1.19761e-05	1.97887e-05
Q8K1B8	Elmo2	Engulfment and cell motility protein 2	ELMO2_MOUSE	-inf	1.95565e-06	1.19799e-05	3.54808e-06
Q8K354	Pck2	Phosphoenolpyruvate carboxykinase [GTP], mitochondrial	PCKGM_MOUSE	-inf	1.95905e-06	1.19879e-05	0.000324359
Q8VE99	Tph2	Tryptophan 5-hydroxylase 2	TPH2_MOUSE	-inf	1.96763e-06	1.20274e-05	4.00741e-06
O35326	Bmerb1	bMERB domain-containing protein 1	MERB1_MOUSE	-inf	1.97092e-06	1.20347e-05	2.35998e-05
Q9CWW6	Babam1	BRISC and BRCA1-A complex member 1	BABA1_MOUSE	-inf	1.97701e-06	1.20469e-05	1.27053e-05
O55060	Kptn	KICSTOR complex protein kaptin	KPTN_MOUSE	-inf	1.97716e-06	1.20469e-05	9.02129e-06
Q9Z0V7	Cul4a	Cullin-4A	CUL4A_MOUSE	-inf	1.98486e-06	1.20809e-05	1.52559e-05
Q61823	Arhgef1	Rho guanine nucleotide exchange factor 1	ARHG1_MOUSE	-inf	1.98704e-06	1.20813e-05	8.33388e-05
Q91YQ3	Mpp5	MAGUK p55 subfamily member 5	MPP5_MOUSE	-inf	1.99799e-06	1.21233e-05	1.47945e-05
P97799	Cnnm2	Metal transporter CNNM2	CNNM2_MOUSE	-inf	1.99821e-06	1.21233e-05	8.57724e-06
P46735	Chchd7	Coiled-coil-helix-coiled-coil-helix domain-containing protein 7	CHCH7_MOUSE	-inf	2.00058e-06	1.21248e-05	1.782e-05
Q9DB16	Sepsecs	O-phosphoseryl-tRNA(Sec) selenium transferase	SPCS_MOUSE	-inf	2.00771e-06	1.21407e-05	4.89808e-06
Q8CIE6	Jmy	Junction-mediating and -regulatory protein	JMY_MOUSE	-inf	2.00798e-06	1.21407e-05	4.82579e-05
P22005	Mrps11	28S ribosomal protein S11, mitochondrial	RT11_MOUSE	-inf	2.0096e-06	1.21407e-05	8.99778e-05
Q9QYI3	Pld1	Phospholipase D1	PLD1_MOUSE	-inf	2.01279e-06	1.21471e-05	2.09117e-05
P27600	Raly	RNA-binding protein Raly	RALY_MOUSE	-inf	2.02045e-06	1.21804e-05	6.4966e-06
Q8R4F1	Rnf7	RING-box protein 2	RBX2_MOUSE	-inf	2.02382e-06	1.21836e-05	8.1102e-06
P62307	Rasa2	Ras GTPase-activating protein 2	RASA2_MOUSE	-inf	2.02888e-06	1.21836e-05	1.92214e-05
Q9CWG8	Golt1b	Vesicle transport protein GOT1B	GOT1B_MOUSE	-inf	2.02927e-06	1.21836e-05	5.40669e-06
Q9CR09	Prrt2	Proline-rich transmembrane protein 2	PRRT2_MOUSE	-inf	2.02953e-06	1.21836e-05	7.5808e-05
Q8VD26	Snrpg	Small nuclear ribonucleoprotein G	RUXG_MOUSE	-inf	2.03789e-06	1.22209e-05	7.16704e-06
P59281	Mrps31	28S ribosomal protein S31, mitochondrial	RT31_MOUSE	-inf	2.04234e-06	1.22347e-05	1.01276e-05
Q3SXD3	Qtrt1	Queuine tRNA-ribosyltransferase catalytic subunit 1	TGT_MOUSE	-inf	2.05968e-06	1.2306e-05	2.38418e-05
Q02111	Eef1e1	Eukaryotic translation elongation factor 1 epsilon-1	MCA3_MOUSE	-inf	2.06024e-06	1.2306e-05	1.69108e-05
Q8BYU6	Acox1	Peroxisomal acyl-coenzyme A oxidase 1	ACOX1_MOUSE	-inf	2.06072e-06	1.2306e-05	2.10037e-06
Q8K5B2	Slc29a1	Equilibrative nucleoside transporter 1	S29A1_MOUSE	-inf	2.06706e-06	1.23309e-05	6.08696e-06
P97807	Mrps16	28S ribosomal protein S16, mitochondrial	RT16_MOUSE	-1.79891	2.06938e-06	1.23318e-05	0.000363171
Q8VCX6	Snrpb2	U2 small nuclear ribonucleoprotein B''	RU2B_MOUSE	-inf	2.0755e-06	1.23513e-05	5.59786e-06
Q08642	Eif2s3x	Eukaryotic translation initiation factor 2 subunit 3, X-linked	IF2G_MOUSE	-inf	2.07889e-06	1.23513e-05	5.2965e-05
Q8CI78	Clec2l	C-type lectin domain family 2 member L	CLC2L_MOUSE	-inf	2.07915e-06	1.23513e-05	1.30999e-05
Q6NZN0	Podxl	Podocalyxin	PODXL_MOUSE	-inf	2.08496e-06	1.23611e-05	3.77464e-06
Q6P5B0	Triap1	TP53-regulated inhibitor of apoptosis 1	TRIA1_MOUSE	-inf	2.08513e-06	1.23611e-05	3.10979e-06
P47856	Npc1	NPC intracellular cholesterol transporter 1	NPC1_MOUSE	-inf	2.08943e-06	1.23737e-05	7.23184e-06
Q9Z2Q5	Pitrm1	Presequence protease, mitochondrial	PREP_MOUSE	-inf	2.10847e-06	1.24643e-05	1.25095e-05
Q8VDT9	Ly6e	Lymphocyte antigen 6E	LY6E_MOUSE	-inf	2.1091e-06	1.24643e-05	1.42837e-05
Q99J85	Tmem199	Transmembrane protein 199	TM199_MOUSE	-inf	2.12357e-06	1.25368e-05	8.05417e-05
P26369	Cryzl2	Quinone oxidoreductase-like protein 2	QORL2_MOUSE	-inf	2.15006e-06	1.268e-05	6.14167e-05
Q3V384	Hs1bp3	HCLS1-binding protein 3	H1BP3_MOUSE	-inf	2.15427e-06	1.26822e-05	1.18532e-05
Q99KP6	Nt5m	5'(3')-deoxyribonucleotidase, mitochondrial	NT5M_MOUSE	-inf	2.15489e-06	1.26822e-05	7.02792e-05
O55026	Ptbp3	Polypyrimidine tract-binding protein 3	PTBP3_MOUSE	-inf	2.15732e-06	1.26834e-05	4.97989e-05
Q8R3T5	Lipa	Lysosomal acid lipase/cholesteryl ester hydrolase	LICH_MOUSE	-inf	2.15955e-06	1.26835e-05	2.46342e-05
Q9JMD3	Copa	Coatomer subunit alpha	COPA_MOUSE	-inf	2.16795e-06	1.27197e-05	3.66012e-05
Q3TY86	Dnajc19	Mitochondrial import inner membrane translocase subunit TIM14	TIM14_MOUSE	-inf	2.17486e-06	1.27471e-05	1.81871e-05
Q9D338	Ccar2	Cell cycle and apoptosis regulator protein 2	CCAR2_MOUSE	-inf	2.19433e-06	1.28479e-05	1.10971e-05
P59764	Sqor	Sulfide:quinone oxidoreductase, mitochondrial	SQOR_MOUSE	-inf	2.19657e-06	1.28479e-05	4.83268e-05
Q8CHQ0	Txn2	Thioredoxin, mitochondrial	THIOM_MOUSE	-inf	2.19921e-06	1.28501e-05	2.21759e-06
Q9D920	Specc1l	Cytospin-A	CYTSA_MOUSE	-inf	2.20189e-06	1.28526e-05	1.27624e-05
Q9Z204	Vps11	Vacuolar protein sorting-associated protein 11 homolog	VPS11_MOUSE	-inf	2.2077e-06	1.28629e-05	0.000239069
Q3UMY5	Tmed5	Transmembrane emp24 domain-containing protein 5	TMED5_MOUSE	-inf	2.20817e-06	1.28629e-05	6.67855e-06
Q9R0M4	Opalin	Opalin	OPALI_MOUSE	-inf	2.21226e-06	1.28736e-05	1.12973e-05
Q9R0H0	Cd99	CD99 antigen	CD99_MOUSE	-inf	2.21989e-06	1.2897e-05	1.2371e-05
O88967	Isoc2b	Isochorismatase domain-containing protein 2B	ISC2B_MOUSE	-inf	2.22087e-06	1.2897e-05	1.32367e-05
Q9ESX5	Bpnt1	3'(2'),5'-bisphosphate nucleotidase 1	BPNT1_MOUSE	-inf	2.22308e-06	1.2897e-05	9.42484e-06
P62069	Commd3	COMM domain-containing protein 3	COMD3_MOUSE	-inf	2.22987e-06	1.29233e-05	1.88141e-05
Q8BYI8	Tmem151a	Transmembrane protein 151A	T151A_MOUSE	-inf	2.23494e-06	1.29389e-05	1.15332e-05
Q07409	Dennd10	DENN domain-containing protein 10	DEN10_MOUSE	-inf	2.2371e-06	1.29389e-05	1.65073e-05
Q9DC61	Mgst1	Microsomal glutathione S-transferase 1	MGST1_MOUSE	-inf	2.2446e-06	1.2969e-05	3.26069e-05
P60755	Isoc2a	Isochorismatase domain-containing protein 2A	ISC2A_MOUSE	-inf	2.26164e-06	1.30543e-05	8.86772e-06
Q60780	Rdx	Radixin	RADI_MOUSE	-inf	2.27367e-06	1.31104e-05	4.95992e-05
Q8BGC4	Tomm34	Mitochondrial import receptor subunit TOM34	TOM34_MOUSE	-inf	2.28003e-06	1.31338e-05	0.000126121
Q8BIP0	Slc29a2	Equilibrative nucleoside transporter 2	S29A2_MOUSE	-inf	2.28926e-06	1.31717e-05	9.54875e-06
Q8BU33	Slc35f6	Solute carrier family 35 member F6	S35F6_MOUSE	-inf	2.29254e-06	1.31717e-05	1.08145e-05
Q91YR7	Mrps9	28S ribosomal protein S9, mitochondrial	RT09_MOUSE	-inf	2.29355e-06	1.31717e-05	5.57948e-06
Q9JJ69	Sec11c	Signal peptidase complex catalytic subunit SEC11C	SC11C_MOUSE	-inf	2.30177e-06	1.32056e-05	2.11638e-05
Q3TFQ1	Csad	Cysteine sulfinic acid decarboxylase	CSAD_MOUSE	-inf	2.30835e-06	1.32272e-05	1.28203e-05
Q8BZQ7	Slc6a4	Sodium-dependent serotonin transporter	SC6A4_MOUSE	-inf	2.31018e-06	1.32272e-05	6.03627e-06
P70288	Galk1	Galactokinase	GALK1_MOUSE	-inf	2.31622e-06	1.32477e-05	2.82365e-05
Q71RI9	Ankmy2	Ankyrin repeat and MYND domain-containing protein 2	ANKY2_MOUSE	-inf	2.3184e-06	1.32477e-05	5.22114e-05
Q91YL3	Tbcc	Tubulin-specific chaperone C	TBCC_MOUSE	-inf	2.32386e-06	1.32593e-05	6.383e-06
Q9CQC6	Mrs2	Magnesium transporter MRS2 homolog, mitochondrial	MRS2_MOUSE	-inf	2.32689e-06	1.32593e-05	2.69432e-05
Q91YP2	Fam136a	Protein FAM136A	F136A_MOUSE	-inf	2.32743e-06	1.32593e-05	2.61323e-05
Q9R088	Cttnbp2nl	CTTNBP2 N-terminal-like protein	CT2NL_MOUSE	-inf	2.33218e-06	1.3268e-05	1.38886e-05
Q62084	Mtmr2	Myotubularin-related protein 2	MTMR2_MOUSE	-inf	2.33361e-06	1.3268e-05	3.85207e-06
Q62241	Abca7	ATP-binding cassette sub-family A member 7	ABCA7_MOUSE	-inf	2.33932e-06	1.32834e-05	2.8772e-05
Q5XG73	Tkfc	Triokinase/FMN cyclase	TKFC_MOUSE	-inf	2.34097e-06	1.32834e-05	7.17568e-06
P97493	Kcnip4;KCNIP4	Kv channel-interacting protein 4	KCIP4_MOUSE;KCIP4_HUMAN	-inf	2.34875e-06	1.32998e-05	8.12949e-05
O88291	Ston2	Stonin-2	STON2_MOUSE	-inf	2.34913e-06	1.32998e-05	1.30029e-05
O09111	Frmd8	FERM domain-containing protein 8	FRMD8_MOUSE	-2.3109	2.35088e-06	1.32998e-05	0.000327586
Q8K3B1	Chrm2	Muscarinic acetylcholine receptor M2	ACM2_MOUSE	-inf	2.36667e-06	1.33721e-05	4.00035e-06
Q9CY34	Naga	Alpha-N-acetylgalactosaminidase	NAGAB_MOUSE	-inf	2.3703e-06	1.33721e-05	1.01922e-05
Q9D1M4	Tra2b	Transformer-2 protein homolog beta	TRA2B_MOUSE	-inf	2.37068e-06	1.33721e-05	6.33241e-06
Q9Z2S7	Rpl22l1	60S ribosomal protein L22-like 1	RL22L_MOUSE	-inf	2.37825e-06	1.33925e-05	2.39011e-05
Q8BUY5	Snx27	Sorting nexin-27	SNX27_MOUSE	-inf	2.37969e-06	1.33925e-05	8.51749e-06
P85094	Lynx1	Ly-6/neurotoxin-like protein 1	LYNX1_MOUSE	-inf	2.38136e-06	1.33925e-05	4.99498e-05
Q6GV12	Fnta	Protein farnesyltransferase/geranylgeranyltransferase type-1 subunit alpha	FNTA_MOUSE	-inf	2.39398e-06	1.34502e-05	2.52605e-05
P70699	Ccs	Copper chaperone for superoxide dismutase	CCS_MOUSE	-inf	2.39995e-06	1.34705e-05	3.57947e-05
Q8K411	Ckm	Creatine kinase M-type	KCRM_MOUSE	-inf	2.40234e-06	1.34706e-05	1.99835e-05
Q9CQH7	Btbd17	BTB/POZ domain-containing protein 17	BTBDH_MOUSE	-inf	2.41106e-06	1.34986e-05	3.80148e-05
Q5DU41	Luc7l2	Putative RNA-binding protein Luc7-like 2	LC7L2_MOUSE	-inf	2.41207e-06	1.34986e-05	3.00567e-06
Q9QXG4	Nptx1	Neuronal pentraxin-1	NPTX1_MOUSE	-inf	2.42353e-06	1.35396e-05	1.43241e-05
Q8VCM3	Abca1;ABCA1,ABCA1	Phospholipid-transporting ATPase ABCA1;ABC transporter A family member 1,Phospholipid-transporting ATPase ABCA1	ABCA1_MOUSE;AB1A_ARATH,ABCA1_HUMAN	-inf	2.42473e-06	1.35396e-05	2.46735e-06
Q9WVD5	Prxl2a	Peroxiredoxin-like 2A	PXL2A_MOUSE	-inf	2.42757e-06	1.35396e-05	5.53507e-06
Q922P9	Tesc	Calcineurin B homologous protein 3	CHP3_MOUSE	-inf	2.42891e-06	1.35396e-05	8.89746e-06
Q9ERZ4	Tuba1c	Tubulin alpha-1C chain	TBA1C_MOUSE	-inf	2.43317e-06	1.35501e-05	1.37075e-06
Q69Z99	Fdx2	Ferredoxin-2, mitochondrial	FDX2_MOUSE	-inf	2.44359e-06	1.35949e-05	8.7142e-06
P70205	Tbc1d7	TBC1 domain family member 7	TBCD7_MOUSE	-inf	2.45455e-06	1.36324e-05	2.12065e-05
P36993	Sirt3	NAD-dependent protein deacetylase sirtuin-3	SIR3_MOUSE	-inf	2.45512e-06	1.36324e-05	2.97484e-05
Q8BMA6	Vps39	Vam6/Vps39-like protein	VPS39_MOUSE	-inf	2.46188e-06	1.36566e-05	1.55254e-05
Q9WU28	Vti1a	Vesicle transport through interaction with t-SNAREs homolog 1A	VTI1A_MOUSE	-inf	2.46755e-06	1.36747e-05	5.14356e-05
Q60575	Sgpp1	Sphingosine-1-phosphate phosphatase 1	SGPP1_MOUSE	-inf	2.47188e-06	1.36854e-05	4.37353e-05
O89116	Fdxr	NADPH:adrenodoxin oxidoreductase, mitochondrial	ADRO_MOUSE	-inf	2.48231e-06	1.37123e-05	2.25988e-05
Q9EQI8	Rbm8a	RNA-binding protein 8A	RBM8A_MOUSE	-inf	2.48293e-06	1.37123e-05	1.43068e-05
P0C0S8	Mrpl16	39S ribosomal protein L16, mitochondrial	RM16_MOUSE	-inf	2.48564e-06	1.37123e-05	0.000313864
P52825	Fgfr1;Fgfr2;Fgfr3;Fgfr4	Fibroblast growth factor receptor 1;Fibroblast growth factor receptor 2;Fibroblast growth factor receptor 3;Fibroblast growth factor receptor 4	FGFR1_MOUSE;FGFR2_MOUSE;FGFR3_MOUSE;FGFR4_MOUSE	-inf	2.48637e-06	1.37123e-05	2.19288e-05
Q7TMC8	Nsdhl	Sterol-4-alpha-carboxylate 3-dehydrogenase, decarboxylating	NSDHL_MOUSE	-inf	2.49197e-06	1.37283e-05	1.24459e-05
Q9CQE2	Fxyd6	FXYD domain-containing ion transport regulator 6	FXYD6_MOUSE	-inf	2.49407e-06	1.37283e-05	5.83814e-06
Q91W96	Hddc2	HD domain-containing protein 2	HDDC2_MOUSE	-inf	2.52321e-06	1.38752e-05	5.09614e-06
Q9CX80	Tomm40l	Mitochondrial import receptor subunit TOM40B	TM40L_MOUSE	-inf	2.52862e-06	1.38916e-05	4.09791e-05
Q8C1Z7	Tcerg1	Transcription elongation regulator 1	TCRG1_MOUSE	-inf	2.53417e-06	1.39087e-05	6.67166e-06
O55033	Sntb2	Beta-2-syntrophin	SNTB2_MOUSE	-inf	2.53846e-06	1.39094e-05	2.07606e-05
Q9CQE1	Lactb2	Endoribonuclease LACTB2	LACB2_MOUSE	-inf	2.54153e-06	1.39094e-05	2.49648e-05
Q9D898	Dcun1d2	DCN1-like protein 2	DCNL2_MOUSE	-1.89209	2.54163e-06	1.39094e-05	0.000348883
P63056	Ranbp1	Ran-specific GTPase-activating protein	RANG_MOUSE	-inf	2.55298e-06	1.39581e-05	4.07912e-06
A6H611	Tarsl2	Threonine--tRNA ligase 2, cytoplasmic	SYTC2_MOUSE	-inf	2.5617e-06	1.39924e-05	1.43181e-05
Q9CQZ6	Cmpk1	UMP-CMP kinase	KCY_MOUSE	-inf	2.5653e-06	1.39986e-05	4.59135e-05
O35678	Amdhd2	N-acetylglucosamine-6-phosphate deacetylase	NAGA_MOUSE	-inf	2.56798e-06	1.39998e-05	6.81353e-05
Q9CWD8	Cad	CAD protein	PYR1_MOUSE	-inf	2.58452e-06	1.40765e-05	1.12878e-05
Q6P4T0	Fxn	Frataxin, mitochondrial	FRDA_MOUSE	-inf	2.58887e-06	1.40824e-05	3.44359e-06
Q80U57	Ube3c	Ubiquitin-protein ligase E3C	UBE3C_MOUSE	-inf	2.59054e-06	1.40824e-05	5.91522e-06
Q9CQX5	Ptdss2	Phosphatidylserine synthase 2	PTSS2_MOUSE	-inf	2.59603e-06	1.40987e-05	1.48534e-05
P07310	Gorasp2	Golgi reassembly-stacking protein 2	GORS2_MOUSE	-inf	2.60055e-06	1.41098e-05	4.30585e-05
Q9QZ73	Ly6c1	Lymphocyte antigen 6C1	LY6C1_MOUSE	-inf	2.61313e-06	1.41572e-05	2.29713e-05
P28652	Ube2z	Ubiquitin-conjugating enzyme E2 Z	UBE2Z_MOUSE	-3.30032	2.61424e-06	1.41572e-05	0.00182393
Q64012	Srsf5,Srsf5;SRSF5	Serine/arginine-rich splicing factor 5	SRSF5_MOUSE	-inf	2.63333e-06	1.4247e-05	2.76302e-05
Q6NZC7	Pkia	cAMP-dependent protein kinase inhibitor alpha	IPKA_MOUSE	-inf	2.64131e-06	1.42766e-05	1.15482e-05
Q69Z26	Bcl2l2	Bcl-2-like protein 2	B2CL2_MOUSE	-inf	2.65481e-06	1.4336e-05	2.21521e-05
Q4KML4	Ptpn1	Tyrosine-protein phosphatase non-receptor type 1	PTN1_MOUSE	-inf	2.67875e-06	1.44516e-05	4.18295e-05
Q61626	Coro7	Coronin-7	CORO7_MOUSE	-inf	2.69972e-06	1.45509e-05	6.75078e-06
Q9ET80	Ube2f	NEDD8-conjugating enzyme UBE2F	UB2FA_MOUSE	-inf	2.7036e-06	1.4558e-05	2.32531e-06
Q78J03	Tmem165	Transmembrane protein 165	TM165_MOUSE	-inf	2.71209e-06	1.459e-05	1.90821e-05
Q9D2P4	Ctsa	Lysosomal protective protein	PPGB_MOUSE	-inf	2.71689e-06	1.4601e-05	1.25784e-05
P25785	Tyro3	Tyrosine-protein kinase receptor TYRO3	TYRO3_MOUSE	-inf	2.71927e-06	1.4601e-05	4.19323e-06
Q6PFE7	Arpc1a	Actin-related protein 2/3 complex subunit 1A	ARC1A_MOUSE	-inf	2.72435e-06	1.46145e-05	1.16953e-05
Q91ZW3	Agpat5	1-acyl-sn-glycerol-3-phosphate acyltransferase epsilon	PLCE_MOUSE	-inf	2.75093e-06	1.47279e-05	3.76674e-05
Q99L45	Flot2	Flotillin-2	FLOT2_MOUSE	-inf	2.75134e-06	1.47279e-05	5.37649e-05
Q62361	Aldh3b1	Aldehyde dehydrogenase family 3 member B1	AL3B1_MOUSE	-inf	2.75323e-06	1.47279e-05	2.03923e-05
Q6PAV2	Abhd11	Protein ABHD11	ABHDB_MOUSE	-inf	2.76172e-06	1.47594e-05	1.5539e-05
Q8CFE4	H2AC11;H2afj;HIST1H2AC;HIST1H2AH;HIST1H2AJ;Hist2h2aa1;HIST2H2AA3;Hist2h2ac;HIST2H2AC	Histone H2A type 1;Histone H2A.J;Histone H2A type 1-C;Histone H2A type 1-H;Histone H2A type 1-J;Histone H2A type 2-A;Histone H2A type 2-A;Histone H2A type 2-C;Histone H2A type 2-C	H2A1_HUMAN;H2AJ_MOUSE;H2A1C_HUMAN;H2A1H_HUMAN;H2A1J_HUMAN;H2A2A_MOUSE;H2A2A_HUMAN;H2A2C_MOUSE;H2A2C_HUMAN	-inf	2.76739e-06	1.47758e-05	2.69198e-05
Q8BXV2	Epg5	Ectopic P granules protein 5 homolog	EPG5_MOUSE	-inf	2.77606e-06	1.47999e-05	1.96614e-05
Q8BGY7	Tmem160	Transmembrane protein 160	TM160_MOUSE	-inf	2.7771e-06	1.47999e-05	1.44797e-05
Q9CY18	Golga5	Golgin subfamily A member 5	GOGA5_MOUSE	-inf	2.78644e-06	1.48359e-05	8.45043e-06
Q8CHH9	Nipal4	Magnesium transporter NIPA4	NIPA4_MOUSE	-2.20616	2.78931e-06	1.48373e-05	0.000311575
Q8BXR9	Mtfr1l	Mitochondrial fission regulator 1-like	MFR1L_MOUSE	-inf	2.81057e-06	1.49057e-05	9.54936e-06
Q9CWG9	Alg5	Dolichyl-phosphate beta-glucosyltransferase	ALG5_MOUSE	-inf	2.81249e-06	1.49057e-05	1.10392e-05
Q811S7	Ddx21	Nucleolar RNA helicase 2	DDX21_MOUSE	-inf	2.81413e-06	1.49057e-05	3.83808e-06
Q9JMA2	Slc24a4	Sodium/potassium/calcium exchanger 4	NCKX4_MOUSE	-inf	2.81462e-06	1.49057e-05	7.27177e-05
Q8BTR5	Mprip	Myosin phosphatase Rho-interacting protein	MPRIP_MOUSE	-inf	2.81751e-06	1.49057e-05	5.64016e-06
P18654	Capn5	Calpain-5	CAN5_MOUSE	-inf	2.81789e-06	1.49057e-05	7.41507e-06
Q8CB44	Eif3k	Eukaryotic translation initiation factor 3 subunit K	EIF3K_MOUSE	-inf	2.83961e-06	1.50068e-05	3.69086e-06
Q99N93	Ik	Protein Red	RED_MOUSE	-inf	2.84673e-06	1.50304e-05	1.17513e-05
Q8VEB4	Grm7	Metabotropic glutamate receptor 7	GRM7_MOUSE	2.68371	2.86153e-06	1.50946e-05	2.69354e-05
Q61469	Clcn3	H(+)/Cl(-) exchange transporter 3	CLCN3_MOUSE	-inf	2.87345e-06	1.51434e-05	9.98728e-06
P24638	Exosc9	Exosome complex component RRP45	EXOS9_MOUSE	-inf	2.88656e-06	1.51718e-05	3.21128e-05
Q91Y97	Fam98b	Protein FAM98B	FA98B_MOUSE	-inf	2.88881e-06	1.51718e-05	0.00022618
B2RQC6	Nsmf	NMDA receptor synaptonuclear signaling and neuronal migration factor	NSMF_MOUSE	-inf	2.89085e-06	1.51718e-05	8.46236e-06
A2RSJ4	Ufsp2	Ufm1-specific protease 2	UFSP2_MOUSE	-inf	2.89134e-06	1.51718e-05	1.95978e-05
Q8BU30	Cfap36	Cilia- and flagella-associated protein 36	CFA36_MOUSE	-inf	2.89215e-06	1.51718e-05	2.72304e-05
Q62189	Pnn	Pinin	PININ_MOUSE	-inf	2.89969e-06	1.51967e-05	6.59207e-05
B2RXC1	Ybx1	Y-box-binding protein 1	YBOX1_MOUSE	-inf	2.90222e-06	1.51967e-05	7.91307e-06
P58802	Il1rap	Interleukin-1 receptor accessory protein	IL1AP_MOUSE	-inf	2.91185e-06	1.52331e-05	6.34643e-06
Q9CYN2	Ndufaf3	NADH dehydrogenase [ubiquinone] 1 alpha subcomplex assembly factor 3	NDUF3_MOUSE	-inf	2.91944e-06	1.52588e-05	1.73733e-05
Q80SY5	N6amt1	Methyltransferase N6AMT1	N6MT1_MOUSE	-inf	2.92269e-06	1.52617e-05	3.29401e-06
Q920P5	Sec63	Translocation protein SEC63 homolog	SEC63_MOUSE	-inf	2.93782e-06	1.5319e-05	1.8636e-05
O35286	Top2b	DNA topoisomerase 2-beta	TOP2B_MOUSE	-inf	2.93903e-06	1.5319e-05	3.86473e-05
Q8VDL4	Trappc3	Trafficking protein particle complex subunit 3	TPPC3_MOUSE	-inf	2.94317e-06	1.53211e-05	4.3285e-06
Q8K406	Chtop	Chromatin target of PRMT1 protein	CHTOP_MOUSE	-inf	2.94734e-06	1.53211e-05	3.25323e-05
O09174	Sarm1	Sterile alpha and TIR motif-containing protein 1	SARM1_MOUSE	-inf	2.94751e-06	1.53211e-05	2.89335e-05
Q9D024	Ktn1	Kinectin	KTN1_MOUSE	2.36518	2.95404e-06	1.53411e-05	5.24314e-05
P62838	Cyp2d26	Cytochrome P450 2D26	CP2DQ_MOUSE	-inf	2.96182e-06	1.53586e-05	0.000119157
Q9D113	Sh2d5	SH2 domain-containing protein 5	SH2D5_MOUSE	-inf	2.96308e-06	1.53586e-05	1.67281e-05
Q8BYM8	Pfas	Phosphoribosylformylglycinamidine synthase	PUR4_MOUSE	-inf	2.9655e-06	1.53586e-05	9.90293e-06
O70400	Ttc39c	Tetratricopeptide repeat protein 39C	TT39C_MOUSE	-inf	2.97308e-06	1.53839e-05	5.4003e-06
Q8VE22	Cmc4	Cx9C motif-containing protein 4	CMC4_MOUSE	-inf	2.98041e-06	1.54078e-05	1.23359e-05
Q61733	Nt5c3a	Cytosolic 5'-nucleotidase 3A	5NT3A_MOUSE	-inf	3.01755e-06	1.55857e-05	1.04004e-05
Q6P3D0	Ano8	Anoctamin-8	ANO8_MOUSE	-inf	3.0223e-06	1.55857e-05	2.2477e-05
O70433	Emc10	ER membrane protein complex subunit 10	EMC10_MOUSE	-inf	3.02637e-06	1.55857e-05	3.88702e-06
P06797	U2af2	Splicing factor U2AF 65 kDa subunit	U2AF2_MOUSE	-inf	3.02729e-06	1.55857e-05	2.00646e-05
Q60928	Slc22a4	Solute carrier family 22 member 4	S22A4_MOUSE	-inf	3.0294e-06	1.55857e-05	7.78012e-06
A2AP18	Ulk3	Serine/threonine-protein kinase ULK3	ULK3_MOUSE	-inf	3.03123e-06	1.55857e-05	3.14807e-05
Q62092	Eif4a3	Eukaryotic initiation factor 4A-III	IF4A3_MOUSE	-inf	3.04206e-06	1.56272e-05	6.05051e-06
Q921G8	Ptk2b	Protein-tyrosine kinase 2-beta	FAK2_MOUSE	-inf	3.04904e-06	1.56352e-05	6.88233e-06
Q80TQ5	Otud4	OTU domain-containing protein 4	OTUD4_MOUSE	-inf	3.04909e-06	1.56352e-05	1.33908e-06
Q924S8	Lhfpl4	LHFPL tetraspan subfamily member 4 protein	LHPL4_MOUSE	-inf	3.05192e-06	1.56356e-05	1.13807e-05
Q9ERF3	Uchl5	Ubiquitin carboxyl-terminal hydrolase isozyme L5	UCHL5_MOUSE	-inf	3.05901e-06	1.56578e-05	7.55058e-06
Q9CQP2	Lztfl1	Leucine zipper transcription factor-like protein 1	LZTL1_MOUSE	-inf	3.06563e-06	1.56777e-05	1.88781e-05
Q99JB8	Ntmt1	N-terminal Xaa-Pro-Lys N-methyltransferase 1	NTM1A_MOUSE	-inf	3.07199e-06	1.56898e-05	1.30777e-05
Q8BKV0	Nqo1	NAD(P)H dehydrogenase [quinone] 1	NQO1_MOUSE	-inf	3.07352e-06	1.56898e-05	2.26029e-06
Q922Y1	Snx33	Sorting nexin-33	SNX33_MOUSE	-inf	3.0891e-06	1.57552e-05	2.17058e-05
P59913	Lypd1	Ly6/PLAUR domain-containing protein 1	LYPD1_MOUSE	-inf	3.09273e-06	1.57596e-05	8.98167e-06
P63158	Sdhaf4	Succinate dehydrogenase assembly factor 4, mitochondrial	SDHF4_MOUSE	-inf	3.1025e-06	1.57904e-05	0.00011841
Q8BKX1	Josd2	Josephin-2	JOS2_MOUSE	-3.9793	3.10431e-06	1.57904e-05	0.000192676
P97347	Smarca5	SWI/SNF-related matrix-associated actin-dependent regulator of chromatin subfamily A member 5	SMCA5_MOUSE	-inf	3.11332e-06	1.58105e-05	3.18085e-05
O35972	Stk26	Serine/threonine-protein kinase 26	STK26_MOUSE	-inf	3.1138e-06	1.58105e-05	8.8607e-06
Q9DBF1	Dennd11	DENN domain-containing protein 11	DEN11_MOUSE	-1.0682	3.12476e-06	1.5852e-05	0.000151143
Q9CRB0	Vps35l	VPS35 endosomal protein sorting factor-like	VP35L_MOUSE	-inf	3.1316e-06	1.58725e-05	3.15431e-06
Q2M3X8	Vamp4	Vesicle-associated membrane protein 4	VAMP4_MOUSE	-inf	3.14117e-06	1.59069e-05	0.000191023
Q0GA42	Washc2	WASH complex subunit 2	WASC2_MOUSE	-inf	3.15682e-06	1.59719e-05	9.43576e-06
Q6PFD9	Clip1	CAP-Gly domain-containing linker protein 1	CLIP1_MOUSE	-inf	3.16025e-06	1.59751e-05	6.19244e-06
Q9WVR4	Nme3	Nucleoside diphosphate kinase 3	NDK3_MOUSE	-inf	3.18065e-06	1.6064e-05	2.22825e-05
Q8C6E0	Phldb1	Pleckstrin homology-like domain family B member 1	PHLB1_MOUSE	-inf	3.19327e-06	1.61134e-05	1.36323e-05
Q920Q4	Ephb1	Ephrin type-B receptor 1	EPHB1_MOUSE	-inf	3.21376e-06	1.62025e-05	1.28458e-05
Q8R3P0	Mrpl41	39S ribosomal protein L41, mitochondrial	RM41_MOUSE	-inf	3.21708e-06	1.62049e-05	6.40803e-05
Q3V0G7	Abca5	ATP-binding cassette sub-family A member 5	ABCA5_MOUSE	-inf	3.22519e-06	1.62313e-05	6.00861e-06
P83510	Ca4	Carbonic anhydrase 4	CAH4_MOUSE	-inf	3.23208e-06	1.62517e-05	3.78244e-05
Q6PDI5	Ppp1r14c	Protein phosphatase 1 regulatory subunit 14C	PP14C_MOUSE	-inf	3.25025e-06	1.63286e-05	1.59642e-05
Q9D6Y9	Eif2a	Eukaryotic translation initiation factor 2A	EIF2A_MOUSE	2.74654	3.2617e-06	1.6368e-05	9.75854e-05
O35685	Mrpl58	Peptidyl-tRNA hydrolase ICT1, mitochondrial	ICT1_MOUSE	-inf	3.26383e-06	1.6368e-05	8.32996e-05
Q8BZ60	Rplp1	60S acidic ribosomal protein P1	RLA1_MOUSE	-inf	3.26859e-06	1.63775e-05	4.69583e-06
O70481	Dlk1	Protein delta homolog 1	DLK1_MOUSE	-inf	3.28688e-06	1.64546e-05	1.05826e-05
Q9DBZ5	Psmd14	26S proteasome non-ATPase regulatory subunit 14	PSDE_MOUSE	-inf	3.29592e-06	1.64854e-05	2.86793e-05
Q9QZH6	Ptprf	Receptor-type tyrosine-protein phosphatase F	PTPRF_MOUSE	-inf	3.30747e-06	1.6518e-05	1.34467e-05
Q3V3R4	Washc1	WASH complex subunit 1	WASH1_MOUSE	-inf	3.30824e-06	1.6518e-05	5.94784e-06
Q9JIG4	Ube2l3	Ubiquitin-conjugating enzyme E2 L3	UB2L3_MOUSE	-inf	3.31148e-06	1.65197e-05	9.5982e-06
Q91Y20	Supv3l1	ATP-dependent RNA helicase SUPV3L1, mitochondrial	SUV3_MOUSE	-inf	3.31774e-06	1.6526e-05	2.86963e-06
Q9D2N9	Adra2a	Alpha-2A adrenergic receptor	ADA2A_MOUSE	-inf	3.31855e-06	1.6526e-05	2.13172e-05
P58137	Fam234b	Protein FAM234B	F234B_MOUSE	-inf	3.33863e-06	1.66005e-05	3.6915e-06
Q8BGH7	Itsn2	Intersectin-2	ITSN2_MOUSE	-inf	3.34073e-06	1.66005e-05	1.67362e-05
A2BDX3	Scly	Selenocysteine lyase	SCLY_MOUSE	-inf	3.34224e-06	1.66005e-05	0.000169116
Q05A62	Mta2	Metastasis-associated protein MTA2	MTA2_MOUSE	-inf	3.34751e-06	1.66121e-05	1.68459e-05
Q8BWY7	Golga3	Golgin subfamily A member 3	GOGA3_MOUSE	2.48652	3.3584e-06	1.66517e-05	1.84471e-05
Q923M0	Rbm28	RNA-binding protein 28	RBM28_MOUSE	-inf	3.36607e-06	1.66527e-05	6.81056e-06
O35598	Pacsin3	Protein kinase C and casein kinase II substrate protein 3	PACN3_MOUSE	-inf	3.36653e-06	1.66527e-05	2.36388e-05
Q9Z1E4	Ube2d2;Ube2d3	Ubiquitin-conjugating enzyme E2 D2;Ubiquitin-conjugating enzyme E2 D3	UB2D2_MOUSE;UB2D3_MOUSE	-inf	3.36737e-06	1.66527e-05	4.12142e-06
Q922Q9	Tbc1d10a	TBC1 domain family member 10A	TB10A_MOUSE	-inf	3.37798e-06	1.66907e-05	9.45747e-06
O70585	Prpf3	U4/U6 small nuclear ribonucleoprotein Prp3	PRPF3_MOUSE	-inf	3.38205e-06	1.66963e-05	2.52629e-05
Q99JW4	Coq10b	Coenzyme Q-binding protein COQ10 homolog B, mitochondrial	CQ10B_MOUSE	-inf	3.38551e-06	1.66989e-05	8.839e-06
Q61627	Smu1	WD40 repeat-containing protein SMU1	SMU1_MOUSE	-inf	3.3902e-06	1.67076e-05	9.85245e-06
P23116	Ace	Angiotensin-converting enzyme	ACE_MOUSE	-inf	3.3981e-06	1.67321e-05	3.3e-05
Q811C2	Pde4a	cAMP-specific 3',5'-cyclic phosphodiesterase 4A	PDE4A_MOUSE	-inf	3.4059e-06	1.6756e-05	5.76827e-06
P0C7M9	Eef1a1	Elongation factor 1-alpha 1	EF1A1_MOUSE	-inf	3.41472e-06	1.67849e-05	2.43018e-05
Q5ND34	Ankrd13c	Ankyrin repeat domain-containing protein 13C	AN13C_MOUSE	-inf	3.42703e-06	1.68253e-05	2.69852e-06
Q9WUU7	Pars2	Probable proline--tRNA ligase, mitochondrial	SYPM_MOUSE	-inf	3.42885e-06	1.68253e-05	1.07718e-05
Q9DAM5	Tp53bp2	Apoptosis-stimulating of p53 protein 2	ASPP2_MOUSE	-inf	3.43788e-06	1.68551e-05	4.42632e-06
Q00899	Unc79	Protein unc-79 homolog	UNC79_MOUSE	-inf	3.47097e-06	1.70027e-05	2.16885e-06
Q9CPT3	Zfyve21	Zinc finger FYVE domain-containing protein 21	ZFY21_MOUSE	-inf	3.48256e-06	1.70448e-05	5.6493e-06
Q8BU14	Nit1	Deaminated glutathione amidase	NIT1_MOUSE	-inf	3.48739e-06	1.70538e-05	2.24451e-05
Q99LD9	Bax	Apoptosis regulator BAX	BAX_MOUSE	-inf	3.50447e-06	1.71201e-05	1.09575e-05
P24457	Cnnm3	Metal transporter CNNM3	CNNM3_MOUSE	-inf	3.50727e-06	1.71201e-05	1.56236e-05
Q99L88	Mob4	MOB-like protein phocein	PHOCN_MOUSE	-inf	3.51297e-06	1.71201e-05	8.26953e-06
O70293	Zfyve19	Abscission/NoCut checkpoint regulator	ANCHR_MOUSE	-inf	3.51298e-06	1.71201e-05	7.7676e-06
P11531	Nipsnap1	Protein NipSnap homolog 1	NIPS1_MOUSE	-inf	3.5322e-06	1.71991e-05	8.22753e-06
Q91VC7	Safb	Scaffold attachment factor B1	SAFB1_MOUSE	-inf	3.53829e-06	1.7214e-05	3.04908e-05
Q9Z1S3	Ptprj	Receptor-type tyrosine-protein phosphatase eta	PTPRJ_MOUSE	-inf	3.55161e-06	1.72641e-05	2.70563e-06
Q8BJZ4	Dcakd	Dephospho-CoA kinase domain-containing protein	DCAKD_MOUSE	-inf	3.55933e-06	1.72869e-05	1.08431e-05
Q3UGR5	Tubgcp2	Gamma-tubulin complex component 2	GCP2_MOUSE	-2.12349	3.56941e-06	1.73211e-05	9.17444e-05
Q9DC53	Asic2	Acid-sensing ion channel 2	ASIC2_MOUSE	-inf	3.57743e-06	1.73452e-05	7.68179e-06
Q9CQP3	Ankfy1	Rabankyrin-5	ANFY1_MOUSE	-inf	3.58278e-06	1.73564e-05	4.65897e-06
Q9R069	Pds5b	Sister chromatid cohesion protein PDS5 homolog B	PDS5B_MOUSE	-inf	3.60114e-06	1.74234e-05	1.98088e-05
O35166	Cyth2	Cytohesin-2	CYH2_MOUSE	-inf	3.60673e-06	1.74234e-05	7.93261e-06
P23780	Cmtm6	CKLF-like MARVEL transmembrane domain-containing protein 6	CKLF6_MOUSE	-inf	3.60731e-06	1.74234e-05	6.67815e-06
Q99JX3	Dars2	Aspartate--tRNA ligase, mitochondrial	SYDM_MOUSE	-inf	3.60884e-06	1.74234e-05	4.32392e-05
Q8CA71	Bloc1s2	Biogenesis of lysosome-related organelles complex 1 subunit 2	BL1S2_MOUSE	-inf	3.63203e-06	1.75205e-05	6.45717e-05
Q3UE37	Nipsnap3b	Protein NipSnap homolog 3B	NPS3B_MOUSE	-inf	3.63674e-06	1.75283e-05	3.37851e-05
Q91YT0	Ccdc58	Coiled-coil domain-containing protein 58	CCD58_MOUSE	-1.17794	3.64397e-06	1.75481e-05	0.000466163
Q8C3X4	Abhd3	Phospholipase ABHD3	ABHD3_MOUSE	-inf	3.647e-06	1.75481e-05	3.81109e-06
Q8C5Q4	Mrpl34	39S ribosomal protein L34, mitochondrial	RM34_MOUSE	-inf	3.65422e-06	1.75601e-05	8.98861e-06
Q63850	Sez6l	Seizure 6-like protein	SE6L1_MOUSE	-inf	3.65565e-06	1.75601e-05	9.17432e-06
Q9D4V0	Cygb	Cytoglobin	CYGB_MOUSE	-inf	3.66167e-06	1.75727e-05	8.4961e-06
Q9DC71	Mob2	MOB kinase activator 2	MOB2_MOUSE	-inf	3.66445e-06	1.75727e-05	2.44093e-05
P17225	Lemd3	Inner nuclear membrane protein Man1	MAN1_MOUSE	-inf	3.67515e-06	1.76092e-05	6.8647e-06
O55028	Ruvbl2	RuvB-like 2	RUVB2_MOUSE	-inf	3.67912e-06	1.76134e-05	1.42386e-05
Q9D9S3	Elmod2	ELMO domain-containing protein 2	ELMD2_MOUSE	-inf	3.68516e-06	1.76275e-05	2.04096e-06
O08583	Thumpd3	THUMP domain-containing protein 3	THUM3_MOUSE	-inf	3.69257e-06	1.76481e-05	4.58662e-05
Q9JLJ0	Dmxl1	DmX-like protein 1	DMXL1_MOUSE	-inf	3.69658e-06	1.76525e-05	1.8767e-05
P47955	Cpox	Oxygen-dependent coproporphyrinogen-III oxidase, mitochondrial	HEM6_MOUSE	-inf	3.70227e-06	1.76648e-05	5.08029e-05
P23591	L2hgdh	L-2-hydroxyglutarate dehydrogenase, mitochondrial	L2HDH_MOUSE	-inf	3.7222e-06	1.77451e-05	1.95571e-05
Q80ZD8	Bphl	Valacyclovir hydrolase	BPHL_MOUSE	-inf	3.74674e-06	1.78471e-05	5.80495e-06
Q9CPZ6	Fech	Ferrochelatase, mitochondrial	HEMH_MOUSE	-inf	3.75225e-06	1.78531e-05	3.32402e-06
O35129	Far1	Fatty acyl-CoA reductase 1	FACR1_MOUSE	-1.27129	3.75642e-06	1.78531e-05	0.000477152
Q9CR84	Scarb2	Lysosome membrane protein 2	SCRB2_MOUSE	-inf	3.75739e-06	1.78531e-05	0.00144805
Q8R4R6	Rhof	Rho-related GTP-binding protein RhoF	RHOF_MOUSE	-inf	3.76519e-06	1.78753e-05	7.58001e-06
Q8BV13	Lnpk	Endoplasmic reticulum junction formation protein lunapark	LNP_MOUSE	-inf	3.79533e-06	1.79889e-05	1.63639e-05
Q99KR6	Rmdn2	Regulator of microtubule dynamics protein 2	RMD2_MOUSE	-inf	3.7956e-06	1.79889e-05	3.93732e-06
Q80ZK0	Myo1d	Unconventional myosin-Id	MYO1D_MOUSE	-inf	3.7986e-06	1.79889e-05	7.86411e-06
Q8CJG0	Psip1	PC4 and SFRS1-interacting protein	PSIP1_MOUSE	-inf	3.82184e-06	1.80743e-05	1.47976e-05
Q61391	Amt	Aminomethyltransferase, mitochondrial	GCST_MOUSE	-inf	3.82355e-06	1.80743e-05	8.58648e-06
P40630	Acad10	Acyl-CoA dehydrogenase family member 10	ACD10_MOUSE	-inf	3.82616e-06	1.80743e-05	7.13274e-05
Q5SVR0	Ddx19a	ATP-dependent RNA helicase DDX19A	DD19A_MOUSE	-inf	3.83937e-06	1.81118e-05	8.71293e-06
O08967	Prpf19	Pre-mRNA-processing factor 19	PRP19_MOUSE	-inf	3.84046e-06	1.81118e-05	2.55828e-05
Q9EPU5	Efr3a	Protein EFR3 homolog A	EFR3A_MOUSE	-inf	3.89519e-06	1.83547e-05	3.66352e-06
Q8VCC9	Gba	Lysosomal acid glucosylceramidase	GLCM_MOUSE	-inf	3.91986e-06	1.84557e-05	3.18748e-05
Q9JHS4	Acss2	Acetyl-coenzyme A synthetase, cytoplasmic	ACSA_MOUSE	-inf	3.93323e-06	1.85034e-05	5.276e-06
Q61016	Nid1	Nidogen-1	NID1_MOUSE	-inf	3.95013e-06	1.85676e-05	0.00141339
Q6ZWR6	Tpr	Nucleoprotein TPR	TPR_MOUSE	-inf	3.95952e-06	1.85964e-05	2.66775e-05
Q63918	Kyat1	Kynurenine--oxoglutarate transaminase 1	KAT1_MOUSE	-inf	3.96356e-06	1.86e-05	3.981e-06
P70452	Mdga2	MAM domain-containing glycosylphosphatidylinositol anchor protein 2	MDGA2_MOUSE	-inf	3.96697e-06	1.86007e-05	1.05262e-05
P61080	Brd3;Brd4	Bromodomain-containing protein 3;Bromodomain-containing protein 4	BRD3_MOUSE;BRD4_MOUSE	-inf	3.97558e-06	1.86257e-05	4.50017e-05
O08740	Eefsec	Selenocysteine-specific elongation factor	SELB_MOUSE	-inf	3.98069e-06	1.86343e-05	4.87788e-06
P47867	Spata2l	Spermatogenesis-associated protein 2-like protein	SPA2L_MOUSE	-inf	3.99051e-06	1.8665e-05	1.6021e-05
Q6PB66	Lamc1	Laminin subunit gamma-1	LAMC1_MOUSE	-1.60526	3.99834e-06	1.86746e-05	0.00011041
Q6P2L7	Cnnm1	Metal transporter CNNM1	CNNM1_MOUSE	-inf	4.00091e-06	1.86746e-05	3.38594e-06
P63034	Rars2	Probable arginine--tRNA ligase, mitochondrial	SYRM_MOUSE	-inf	4.00241e-06	1.86746e-05	2.51502e-05
A6H630	Fbxo31	F-box only protein 31	FBX31_MOUSE	-inf	4.01731e-06	1.87288e-05	2.28844e-05
Q9DCH4	Mlf2	Myeloid leukemia factor 2	MLF2_MOUSE	-inf	4.02746e-06	1.87608e-05	4.16827e-05
P63254	Aldh4a1	Delta-1-pyrroline-5-carboxylate dehydrogenase, mitochondrial	AL4A1_MOUSE	-11.7753	4.0632e-06	1.89118e-05	4.10521e-05
Q8K2F0	Top1	DNA topoisomerase 1	TOP1_MOUSE	-inf	4.07348e-06	1.89318e-05	7.77442e-06
F7BWT7	Gas7	Growth arrest-specific protein 7	GAS7_MOUSE	-inf	4.07414e-06	1.89318e-05	6.00481e-06
Q8BJW6	Atpaf2	ATP synthase mitochondrial F1 complex assembly factor 2	ATPF2_MOUSE	-inf	4.08112e-06	1.89341e-05	1.21885e-05
Q8BXT1	Ift22	Intraflagellar transport protein 22 homolog	IFT22_MOUSE	-inf	4.08129e-06	1.89341e-05	2.65325e-05
P46097	Sephs1	Selenide, water dikinase 1	SPS1_MOUSE	-inf	4.09144e-06	1.89658e-05	5.02208e-05
P09240	Eif3h	Eukaryotic translation initiation factor 3 subunit H	EIF3H_MOUSE	-inf	4.09507e-06	1.89672e-05	5.04494e-05
Q64455	Dr1	Protein Dr1	NC2B_MOUSE	-inf	4.09988e-06	1.8974e-05	8.6495e-06
D3YXK2	Gcat	2-amino-3-ketobutyrate coenzyme A ligase, mitochondrial	KBL_MOUSE	-inf	4.11786e-06	1.90272e-05	3.82975e-05
O35710	Bcam	Basal cell adhesion molecule	BCAM_MOUSE	-inf	4.11805e-06	1.90272e-05	6.14548e-06
Q9CYK1	Polr2b	DNA-directed RNA polymerase II subunit RPB2	RPB2_MOUSE	-inf	4.14107e-06	1.91044e-05	8.63685e-06
P47212	Myh11	Myosin-11	MYH11_MOUSE	-inf	4.14147e-06	1.91044e-05	1.87826e-05
Q8C0L9	Dnajc2	DnaJ homolog subfamily C member 2	DNJC2_MOUSE	-inf	4.14724e-06	1.91156e-05	1.56232e-05
Q99KK9	Prpf6	Pre-mRNA-processing factor 6	PRP6_MOUSE	-inf	4.16967e-06	1.92034e-05	8.59417e-06
Q8CFV9	Eif4g2	Eukaryotic translation initiation factor 4 gamma 2	IF4G2_MOUSE	-inf	4.17581e-06	1.92162e-05	1.59899e-05
Q8C6G8	Akr1b8	Aldose reductase-related protein 2	ALD2_MOUSE	-inf	4.19323e-06	1.92681e-05	8.84115e-06
Q9CR88	Ube4a	Ubiquitin conjugation factor E4 A	UBE4A_MOUSE	-inf	4.19703e-06	1.92681e-05	3.68897e-06
Q61292	Phyhd1	Phytanoyl-CoA dioxygenase domain-containing protein 1	PHYD1_MOUSE	-inf	4.19878e-06	1.92681e-05	3.66932e-05
Q6ZQ08	Myg1	UPF0160 protein MYG1, mitochondrial	MYG1_MOUSE	-inf	4.20063e-06	1.92681e-05	1.37287e-05
Q8BGR8	Rmnd1	Required for meiotic nuclear division protein 1 homolog	RMND1_MOUSE	-inf	4.21465e-06	1.93169e-05	9.10154e-06
Q3UVG3	Minpp1	Multiple inositol polyphosphate phosphatase 1	MINP1_MOUSE	-inf	4.22124e-06	1.93315e-05	6.65237e-06
B1AZI6	Ostc	Oligosaccharyltransferase complex subunit OSTC	OSTC_MOUSE	-inf	4.2412e-06	1.94073e-05	2.85595e-06
Q3UFY7	Gtf2i	General transcription factor II-I	GTF2I_MOUSE	-inf	4.25327e-06	1.94469e-05	9.36961e-06
Q9CQF3	Pitpnm3	Membrane-associated phosphatidylinositol transfer protein 3	PITM3_MOUSE	-inf	4.26051e-06	1.94512e-05	2.35791e-05
Q8VHN8	Tmem258	Transmembrane protein 258	TM258_MOUSE	-inf	4.26102e-06	1.94512e-05	7.16977e-06
Q566J8	Dus3l	tRNA-dihydrouridine(47) synthase [NAD(P)(+)]-like	DUS3L_MOUSE	-inf	4.27594e-06	1.95036e-05	3.95927e-06
Q3U2V3	Ica1	Islet cell autoantigen 1	ICA69_MOUSE	-inf	4.28146e-06	1.95132e-05	4.4239e-06
Q3UHE1	Tktl1	Transketolase-like protein 1	TKTL1_MOUSE	-inf	4.29041e-06	1.95298e-05	5.38122e-06
P10493	Acox3	Peroxisomal acyl-coenzyme A oxidase 3	ACOX3_MOUSE	-inf	4.29335e-06	1.95298e-05	2.76881e-05
Q8C079	Pip4k2a	Phosphatidylinositol 5-phosphate 4-kinase type-2 alpha	PI42A_MOUSE	-inf	4.29539e-06	1.95298e-05	4.04225e-05
P98156	Coil	Coilin	COIL_MOUSE	-inf	4.30402e-06	1.95534e-05	5.60026e-06
O08917	Chmp3	Charged multivesicular body protein 3	CHMP3_MOUSE	-1.40805	4.32449e-06	1.96308e-05	0.000125269
Q9D415	Galc	Galactocerebrosidase	GALC_MOUSE	-inf	4.34805e-06	1.9722e-05	1.51513e-05
Q9DBR2	Cspg4	Chondroitin sulfate proteoglycan 4	CSPG4_MOUSE	-inf	4.35201e-06	1.97243e-05	3.2584e-06
Q80XR2	Lrrfip2	Leucine-rich repeat flightless-interacting protein 2	LRRF2_MOUSE	-inf	4.36145e-06	1.97513e-05	8.8273e-06
Q80Y24	Ppih	Peptidyl-prolyl cis-trans isomerase H	PPIH_MOUSE	-inf	4.38045e-06	1.98173e-05	2.26766e-05
Q9QXM1	Gria4	Glutamate receptor 4	GRIA4_MOUSE	-inf	4.38297e-06	1.98173e-05	4.27165e-06
Q80U35	Osbpl8	Oxysterol-binding protein-related protein 8	OSBL8_MOUSE	-inf	4.39738e-06	1.98662e-05	4.70653e-06
Q05BC3	Kcnh1;KCNH1;Kcnh5	Potassium voltage-gated channel subfamily H member 1;Potassium voltage-gated channel subfamily H member 1;Potassium voltage-gated channel subfamily H member 5	KCNH1_MOUSE;KCNH1_HUMAN;KCNH5_MOUSE	-inf	4.40119e-06	1.98662e-05	2.44276e-05
Q9JJV5	Dhx29	ATP-dependent RNA helicase DHX29	DHX29_MOUSE	-inf	4.40425e-06	1.98662e-05	4.24583e-05
Q91ZF0	Ddc	Aromatic-L-amino-acid decarboxylase	DDC_MOUSE	-inf	4.41563e-06	1.99018e-05	4.49533e-06
Q6P9Z1	Memo1	Protein MEMO1	MEMO1_MOUSE	-inf	4.42361e-06	1.99065e-05	3.64731e-06
Q99LE6	Ggact	Gamma-glutamylaminecyclotransferase	GGACT_MOUSE	-inf	4.42366e-06	1.99065e-05	1.90285e-05
Q8CHX7	Fbl	rRNA 2'-O-methyltransferase fibrillarin	FBRL_MOUSE	-inf	4.42817e-06	1.99096e-05	1.65544e-05
Q9WVL2	Shfl	Shiftless antiviral inhibitor of ribosomal frameshifting protein homolog	SHFL_MOUSE	-inf	4.43136e-06	1.99096e-05	7.76245e-07
Q8R2Q4	Rps6ka3	Ribosomal protein S6 kinase alpha-3	KS6A3_MOUSE	-inf	4.44006e-06	1.99331e-05	3.93125e-06
Q61730	Tnfrsf21	Tumor necrosis factor receptor superfamily member 21	TNR21_MOUSE	-inf	4.48995e-06	2.01411e-05	1.01298e-05
Q8BZW8	Slirp	SRA stem-loop-interacting RNA-binding protein, mitochondrial	SLIRP_MOUSE	-inf	4.50719e-06	2.02026e-05	9.51573e-06
Q91WG4	Ptrhd1	Putative peptidyl-tRNA hydrolase PTRHD1	PTRD1_MOUSE	-inf	4.52093e-06	2.02269e-05	7.62361e-06
Q99MS8	Map2	Microtubule-associated protein 2	MTAP2_MOUSE	-inf	4.52146e-06	2.02269e-05	4.52301e-06
Q61214	Ilvbl	Acetolactate synthase-like protein	ILVBL_MOUSE	-inf	4.52818e-06	2.02269e-05	5.13051e-06
Q9QZI9	Nedd8	NEDD8	NEDD8_MOUSE	-inf	4.53262e-06	2.02269e-05	2.5982e-05
B1AVZ0	Septin10	Septin-10	SEP10_MOUSE	-inf	4.53422e-06	2.02269e-05	7.98508e-06
P16014	Eif1b	Eukaryotic translation initiation factor 1b	EIF1B_MOUSE	-inf	4.53724e-06	2.02269e-05	2.08925e-05
Q8VE37	Abca2	ATP-binding cassette sub-family A member 2	ABCA2_MOUSE	-inf	4.54164e-06	2.02269e-05	1.71515e-05
P97434	Nrsn1	Neurensin-1	NRSN1_MOUSE	-inf	4.54349e-06	2.02269e-05	9.6959e-06
E9Q6B2	Gabarapl1;GABARAPL1	Gamma-aminobutyric acid receptor-associated protein-like 1	GBRL1_MOUSE;GBRL1_HUMAN	-inf	4.54458e-06	2.02269e-05	9.47643e-06
Q8CC88	Asic1	Acid-sensing ion channel 1	ASIC1_MOUSE	-inf	4.54813e-06	2.02269e-05	2.89571e-05
Q99LC8	Diablo	Diablo homolog, mitochondrial	DBLOH_MOUSE	-inf	4.55618e-06	2.02469e-05	3.74601e-06
Q80ZX8	Hsp90aa1	Heat shock protein HSP 90-alpha	HS90A_MOUSE	-inf	4.56811e-06	2.02841e-05	3.18804e-06
B1AS29	Ppp6r1	Serine/threonine-protein phosphatase 6 regulatory subunit 1	PP6R1_MOUSE	-inf	4.5742e-06	2.02954e-05	3.64899e-06
A2RSQ0	Scp2	Non-specific lipid-transfer protein	NLTP_MOUSE	-inf	4.59201e-06	2.03466e-05	4.69379e-06
Q9DAZ9	G3bp1	Ras GTPase-activating protein-binding protein 1	G3BP1_MOUSE	-inf	4.59289e-06	2.03466e-05	9.33511e-06
Q14B80	Eif3b	Eukaryotic translation initiation factor 3 subunit B	EIF3B_MOUSE	-inf	4.60085e-06	2.03593e-05	7.2474e-06
Q6PHQ8	Tpgs1	Tubulin polyglutamylase complex subunit 1	TPGS1_MOUSE	-inf	4.60482e-06	2.03593e-05	8.76383e-06
Q9CYA0	Abat	4-aminobutyrate aminotransferase, mitochondrial	GABT_MOUSE	2.97471	4.60647e-06	2.03593e-05	3.58518e-05
Q9DCN2	Rps6ka5	Ribosomal protein S6 kinase alpha-5	KS6A5_MOUSE	-1.98091	4.61153e-06	2.03658e-05	0.000228792
Q9DD02	Gpd1l	Glycerol-3-phosphate dehydrogenase 1-like protein	GPD1L_MOUSE	-inf	4.62876e-06	2.04147e-05	1.40961e-05
P60670	Gadd45gip1	Growth arrest and DNA damage-inducible proteins-interacting protein 1	G45IP_MOUSE	-inf	4.62976e-06	2.04147e-05	1.99144e-05
Q8K2Y7	Smarcc2	SWI/SNF complex subunit SMARCC2	SMRC2_MOUSE	-inf	4.63699e-06	2.04307e-05	8.67571e-06
Q3TD49	Smarcd3	SWI/SNF-related matrix-associated actin-dependent regulator of chromatin subfamily D member 3	SMRD3_MOUSE	-inf	4.64629e-06	2.0446e-05	1.59485e-06
Q8C2E7	Tacc2	Transforming acidic coiled-coil-containing protein 2	TACC2_MOUSE	-inf	4.64764e-06	2.0446e-05	2.36972e-05
Q6PCX7	Commd8	COMM domain-containing protein 8	COMD8_MOUSE	-inf	4.65457e-06	2.04607e-05	2.04325e-06
Q60857	Susd2	Sushi domain-containing protein 2	SUSD2_MOUSE	-inf	4.69017e-06	2.05994e-05	1.36608e-05
Q6RI63	Mrps30	28S ribosomal protein S30, mitochondrial	RT30_MOUSE	-inf	4.69336e-06	2.05994e-05	3.55488e-06
Q9Z0U1	Copg2	Coatomer subunit gamma-2	COPG2_MOUSE	-inf	4.70552e-06	2.06369e-05	2.19772e-05
O88736	Btf3	Transcription factor BTF3	BTF3_MOUSE	-inf	4.71614e-06	2.06676e-05	2.45021e-05
O08747	Tmem9b	Transmembrane protein 9B	TMM9B_MOUSE	-inf	4.72005e-06	2.06688e-05	3.73362e-06
Q8BNJ6	Lamp5	Lysosome-associated membrane glycoprotein 5	LAMP5_MOUSE	-inf	4.73178e-06	2.07043e-05	6.88569e-06
Q9Z2M7	Sec23b	Protein transport protein Sec23B	SC23B_MOUSE	-inf	4.74365e-06	2.07315e-05	2.4735e-05
P32921	Slmap	Sarcolemmal membrane-associated protein	SLMAP_MOUSE	-inf	4.74528e-06	2.07315e-05	8.9844e-05
Q91YM4	Amfr	E3 ubiquitin-protein ligase AMFR	AMFR_MOUSE	-inf	4.77441e-06	2.08428e-05	1.60561e-05
Q9JKX6	Arl15	ADP-ribosylation factor-like protein 15	ARL15_MOUSE	-inf	4.77924e-06	2.08479e-05	2.20437e-05
Q9QUR8	Gab1	GRB2-associated-binding protein 1	GAB1_MOUSE	-inf	4.784e-06	2.08527e-05	1.68118e-05
P16390	Cnot9	CCR4-NOT transcription complex subunit 9	CNOT9_MOUSE	-inf	4.79637e-06	2.08898e-05	8.52191e-06
Q68ED2	Mrps5	28S ribosomal protein S5, mitochondrial	RT05_MOUSE	-inf	4.79985e-06	2.08898e-05	2.11463e-05
Q61070	Unc119	Protein unc-119 homolog A	U119A_MOUSE	-inf	4.80848e-06	2.09114e-05	7.44623e-06
Q6NXM2	Hspg2	Basement membrane-specific heparan sulfate proteoglycan core protein	PGBM_MOUSE	-inf	4.82172e-06	2.0953e-05	2.38295e-06
B9EJA2	Smyd3	Histone-lysine N-methyltransferase SMYD3	SMYD3_MOUSE	-inf	4.83644e-06	2.10009e-05	6.83053e-05
Q99M28	Myef2	Myelin expression factor 2	MYEF2_MOUSE	-inf	4.8409e-06	2.10043e-05	2.48009e-05
Q9WTN0	Pigs	GPI transamidase component PIG-S	PIGS_MOUSE	-inf	4.87962e-06	2.11451e-05	2.29979e-05
Q62178	Srrm1	Serine/arginine repetitive matrix protein 1	SRRM1_MOUSE	-inf	4.88156e-06	2.11451e-05	1.34468e-05
Q6ZQB6	Spag9	C-Jun-amino-terminal kinase-interacting protein 4	JIP4_MOUSE	-inf	4.8845e-06	2.11451e-05	4.43493e-06
Q5XJY5	Cc2d1b	Coiled-coil and C2 domain-containing protein 1B	C2D1B_MOUSE	-inf	4.89652e-06	2.11784e-05	3.38463e-05
P50428	Alyref	THO complex subunit 4	THOC4_MOUSE	-inf	4.89963e-06	2.11784e-05	1.10428e-05
Q9CWU9	Grik2	Glutamate receptor ionotropic, kainate 2	GRIK2_MOUSE	-inf	4.91833e-06	2.12432e-05	2.01567e-06
Q9EQG9	Senp7	Sentrin-specific protease 7	SENP7_MOUSE	-inf	4.92941e-06	2.12749e-05	4.53004e-06
Q8K2Q0	Kcmf1	E3 ubiquitin-protein ligase KCMF1	KCMF1_MOUSE	-inf	4.94579e-06	2.13294e-05	1.35098e-05
Q8BNE1	Cars2	Probable cysteine--tRNA ligase, mitochondrial	SYCM_MOUSE	-inf	4.9722e-06	2.14271e-05	2.75504e-06
Q811J3	Mrpl42	39S ribosomal protein L42, mitochondrial	RM42_MOUSE	-inf	4.99002e-06	2.14876e-05	4.09887e-06
Q0VGU4	Son	Protein SON	SON_MOUSE	-inf	4.99536e-06	2.14944e-05	0.000165373
O70370	Wdr5	WD repeat-containing protein 5	WDR5_MOUSE	5.85624	5.01548e-06	2.15647e-05	0.000246683
P26450	Mybbp1a	Myb-binding protein 1A	MBB1A_MOUSE	-inf	5.04638e-06	2.16812e-05	6.97541e-06
Q9Z0Z4	Zzef1	Zinc finger ZZ-type and EF-hand domain-containing protein 1	ZZEF1_MOUSE	-inf	5.05677e-06	2.17094e-05	1.83002e-06
Q64314	Pde1b	Calcium/calmodulin-dependent 3',5'-cyclic nucleotide phosphodiesterase 1B	PDE1B_MOUSE	-inf	5.06821e-06	2.17422e-05	1.25942e-05
O35668	Itgb8	Integrin beta-8	ITB8_MOUSE	-inf	5.09878e-06	2.18569e-05	3.33578e-05
Q3TAS6	Prps2	Ribose-phosphate pyrophosphokinase 2	PRPS2_MOUSE	-inf	5.10784e-06	2.18727e-05	1.5921e-05
O35969	Ireb2	Iron-responsive element-binding protein 2	IREB2_MOUSE	-inf	5.11381e-06	2.18727e-05	2.87685e-05
Q8R464	Polr2m	DNA-directed RNA polymerase II subunit GRINL1A	GRL1A_MOUSE	-3.62476	5.11399e-06	2.18727e-05	0.000217397
Q8BSY0	Tiam2	T-lymphoma invasion and metastasis-inducing protein 2	TIAM2_MOUSE	5.81142	5.16051e-06	2.2041e-05	0.000203921
Q9D8B7	Tmem186	Transmembrane protein 186	TM186_MOUSE	-inf	5.16109e-06	2.2041e-05	7.54213e-05
P57776	Ddhd2	Phospholipase DDHD2	DDHD2_MOUSE	-3.97939	5.17341e-06	2.20771e-05	0.000289116
Q91WA3	Mrpl4	39S ribosomal protein L4, mitochondrial	RM04_MOUSE	-inf	5.19772e-06	2.21642e-05	2.07077e-05
Q8BHI7	Slc25a33	Solute carrier family 25 member 33	S2533_MOUSE	-inf	5.20391e-06	2.2174e-05	8.4536e-06
Q8CHE4	Inf2	Inverted formin-2	INF2_MOUSE	-inf	5.21686e-06	2.22011e-05	1.85726e-06
O70172	Hcn2	Potassium/sodium hyperpolarization-activated cyclic nucleotide-gated channel 2	HCN2_MOUSE	-inf	5.21805e-06	2.22011e-05	8.33374e-05
Q8R0J7	B3gat3	Galactosylgalactosylxylosylprotein 3-beta-glucuronosyltransferase 3	B3GA3_MOUSE	-inf	5.22204e-06	2.22015e-05	7.36357e-06
Q922P8	Gfer	FAD-linked sulfhydryl oxidase ALR	ALR_MOUSE	-inf	5.22652e-06	2.22039e-05	1.06661e-05
Q8JZN5	Usp46	Ubiquitin carboxyl-terminal hydrolase 46	UBP46_MOUSE	-inf	5.31169e-06	2.25489e-05	7.19717e-05
Q5PR69	Dkc1	H/ACA ribonucleoprotein complex subunit DKC1	DKC1_MOUSE	-inf	5.31749e-06	2.25568e-05	4.80052e-06
Q8C170	Dek	Protein DEK	DEK_MOUSE	-inf	5.32706e-06	2.25806e-05	2.31254e-06
O88704	Fam49a	Protein FAM49A	FA49A_MOUSE	-inf	5.33344e-06	2.25908e-05	2.06628e-05
Q3UTJ2	Drg1	Developmentally-regulated GTP-binding protein 1	DRG1_MOUSE	-inf	5.3418e-06	2.25971e-05	3.26455e-05
Q9D4F8	H2afy2	Core histone macro-H2A.2	H2AW_MOUSE	-inf	5.34286e-06	2.25971e-05	2.89221e-06
Q5XJY4	Dguok	Deoxyguanosine kinase, mitochondrial	DGUOK_MOUSE	-inf	5.35515e-06	2.26323e-05	8.02908e-06
Q6V4S5	Mindy1	Ubiquitin carboxyl-terminal hydrolase MINDY-1	MINY1_MOUSE	-inf	5.37523e-06	2.27003e-05	5.73597e-05
Q8VE19	Ptbp1	Polypyrimidine tract-binding protein 1	PTBP1_MOUSE	-inf	5.43323e-06	2.29096e-05	6.6885e-06
Q91X52	Jam3	Junctional adhesion molecule C	JAM3_MOUSE	-inf	5.43873e-06	2.29096e-05	2.7631e-06
Q3TPE9	Ptn	Pleiotrophin	PTN_MOUSE	-inf	5.44027e-06	2.29096e-05	1.65686e-05
A2APY7	Gpr88	Probable G-protein coupled receptor 88	GPR88_MOUSE	-inf	5.44688e-06	2.29096e-05	1.37778e-05
Q8BGN3	Arsg	Arylsulfatase G	ARSG_MOUSE	-inf	5.44733e-06	2.29096e-05	6.58541e-05
Q3U186	U2surp	U2 snRNP-associated SURP motif-containing protein	SR140_MOUSE	-inf	5.44893e-06	2.29096e-05	1.23682e-05
Q3UQ44	Cartpt	Cocaine- and amphetamine-regulated transcript protein	CART_MOUSE	-inf	5.45865e-06	2.29336e-05	3.09644e-06
Q8K370	Ccdc85c	Coiled-coil domain-containing protein 85C	CC85C_MOUSE	-inf	5.48991e-06	2.30454e-05	3.11046e-06
Q9EP72	Ndufaf2	NADH dehydrogenase [ubiquinone] 1 alpha subcomplex assembly factor 2	NDUF2_MOUSE	-inf	5.49336e-06	2.30454e-05	1.81508e-05
Q8VCX5	Kcnab3	Voltage-gated potassium channel subunit beta-3	KCAB3_MOUSE	-inf	5.51323e-06	2.31117e-05	3.8401e-05
Q8BVG4	Cd63	CD63 antigen	CD63_MOUSE	-inf	5.52387e-06	2.31199e-05	6.89042e-06
Q91YI1	Pmch	Pro-MCH	MCH_MOUSE	-inf	5.52571e-06	2.31199e-05	6.74809e-06
Q8CA72	Ebag9	Receptor-binding cancer antigen expressed on SiSo cells	RCAS1_MOUSE	-inf	5.52734e-06	2.31199e-05	4.47728e-06
Q9JHW4	Rbbp9	Putative hydrolase RBBP9	RBBP9_MOUSE	-inf	5.53272e-06	2.31254e-05	1.06997e-05
P27671	Shc3	SHC-transforming protein 3	SHC3_MOUSE	-inf	5.53892e-06	2.31343e-05	1.53188e-05
Q8VE52	Slc25a15	Mitochondrial ornithine transporter 1	ORNT1_MOUSE	-inf	5.55071e-06	2.31568e-05	9.1717e-06
P28230	Mrps6	28S ribosomal protein S6, mitochondrial	RT06_MOUSE	-inf	5.55243e-06	2.31568e-05	3.35259e-06
Q8K2D3	Nsg1	Neuronal vesicle trafficking-associated protein 1	NSG1_MOUSE	-inf	5.56302e-06	2.3184e-05	7.82215e-06
Q61147	Ilk	Integrin-linked protein kinase	ILK_MOUSE	-inf	5.57047e-06	2.31981e-05	3.91067e-06
Q5SUF2	Acy3	N-acyl-aromatic-L-amino acid amidohydrolase (carboxylate-forming)	ACY3_MOUSE	-inf	5.57639e-06	2.32058e-05	7.13052e-06
Q8C8N2	Ldhd	Probable D-lactate dehydrogenase, mitochondrial	LDHD_MOUSE	2.77648	5.58707e-06	2.32285e-05	0.000175542
Q9CZX9	Phospho1	Phosphoethanolamine/phosphocholine phosphatase	PHOP1_MOUSE	-inf	5.59287e-06	2.32285e-05	1.42744e-05
Q8BJF9	Tmod3	Tropomodulin-3	TMOD3_MOUSE	-inf	5.5941e-06	2.32285e-05	1.04049e-05
Q91W61	Gjb1	Gap junction beta-1 protein	CXB1_MOUSE	-inf	5.60043e-06	2.32379e-05	1.08678e-05
O70423	Sema4f	Semaphorin-4F	SEM4F_MOUSE	-inf	5.62723e-06	2.33321e-05	7.5369e-05
Q05D44	Wrb	Tail-anchored protein insertion receptor WRB	WRB_MOUSE	-inf	5.64777e-06	2.34003e-05	9.63106e-06
Q8VEF1	Glb1	Beta-galactosidase	BGAL_MOUSE	-inf	5.68813e-06	2.35385e-05	4.48415e-06
Q9DB34	Cdk11b	Cyclin-dependent kinase 11B	CD11B_MOUSE	-inf	5.68941e-06	2.35385e-05	3.80371e-05
Q9WUP7	Rin1	Ras and Rab interactor 1	RIN1_MOUSE	-inf	5.7199e-06	2.36475e-05	2.22746e-05
Q9CZ28	Ly6a	Lymphocyte antigen 6A-2/6E-1	LY6A_MOUSE	-inf	5.72915e-06	2.36686e-05	9.63041e-06
Q99K23	Zc3h4	Zinc finger CCCH domain-containing protein 4	ZC3H4_MOUSE	-inf	5.76025e-06	2.37753e-05	8.34715e-06
P83093	Etnppl	Ethanolamine-phosphate phospho-lyase	AT2L1_MOUSE	-inf	5.76334e-06	2.37753e-05	1.09928e-05
Q9DCJ9	Rpl7a	60S ribosomal protein L7a	RL7A_MOUSE	-inf	5.77265e-06	2.37965e-05	1.60165e-05
Q8K3C3	Pgbd5	PiggyBac transposable element-derived protein 5	PGBD5_MOUSE	-inf	5.80286e-06	2.39015e-05	1.43003e-05
Q99PI8	Sec14l2	SEC14-like protein 2	S14L2_MOUSE	-inf	5.80797e-06	2.39015e-05	9.54032e-06
Q80XU8	Sf3a1	Splicing factor 3A subunit 1	SF3A1_MOUSE	-inf	5.81071e-06	2.39015e-05	9.64463e-06
Q61771	Cyth1	Cytohesin-1	CYH1_MOUSE	-inf	5.83321e-06	2.39717e-05	1.13719e-05
Q8CH09	Sugp2	SURP and G-patch domain-containing protein 2	SUGP2_MOUSE	-inf	5.8362e-06	2.39717e-05	9.52346e-06
Q3U1V6	Golga7	Golgin subfamily A member 7	GOGA7_MOUSE	-inf	5.85293e-06	2.40232e-05	5.70955e-06
Q8C0D5	Hspa12b	Heat shock 70 kDa protein 12B	HS12B_MOUSE	-inf	5.86663e-06	2.40621e-05	2.17529e-05
Q3U3Q1	Gmpr2	GMP reductase 2	GMPR2_MOUSE	-inf	5.87786e-06	2.40908e-05	6.72195e-06
Q3UKJ7	Emc3	ER membrane protein complex subunit 3	EMC3_MOUSE	-inf	5.89343e-06	2.41372e-05	1.13883e-05
P62313	Chm	Rab proteins geranylgeranyltransferase component A 1	RAE1_MOUSE	-inf	5.89997e-06	2.41467e-05	3.29911e-05
Q5SWU9	Rpl35a	60S ribosomal protein L35a	RL35A_MOUSE	5.49886	5.90585e-06	2.41533e-05	0.000378167
O55222	Lsm8	U6 snRNA-associated Sm-like protein LSm8	LSM8_MOUSE	-inf	5.92761e-06	2.4225e-05	2.08343e-05
Q8K1J6	Dnajc8	DnaJ homolog subfamily C member 8	DNJC8_MOUSE	-inf	5.94683e-06	2.42861e-05	2.79679e-05
Q8C854	Parva	Alpha-parvin	PARVA_MOUSE	-inf	5.95772e-06	2.43131e-05	9.75618e-05
P97492	Dgkb	Diacylglycerol kinase beta	DGKB_MOUSE	-inf	5.96335e-06	2.43187e-05	1.77175e-05
P16092	Rad23a	UV excision repair protein RAD23 homolog A	RD23A_MOUSE	-inf	5.98039e-06	2.43707e-05	5.83163e-06
Q62413	Plch2	1-phosphatidylinositol 4,5-bisphosphate phosphodiesterase eta-2	PLCH2_MOUSE	-inf	6.01361e-06	2.44666e-05	5.05265e-06
Q9ES46	Rabepk	Rab9 effector protein with kelch motifs	RABEK_MOUSE	-inf	6.01698e-06	2.44666e-05	2.26674e-06
Q8K3A0	Xpot	Exportin-T	XPOT_MOUSE	-inf	6.0188e-06	2.44666e-05	9.85903e-06
Q8VCN9	Frs3	Fibroblast growth factor receptor substrate 3	FRS3_MOUSE	-inf	6.02109e-06	2.44666e-05	2.89528e-05
Q6PGH0	Syn1	Synapsin-1	SYN1_MOUSE	-inf	6.04993e-06	2.45663e-05	9.92468e-06
Q8BG02	Rer1	Protein RER1	RER1_MOUSE	-inf	6.06074e-06	2.4584e-05	6.98204e-06
Q60972	Snap23	Synaptosomal-associated protein 23	SNP23_MOUSE	-inf	6.06294e-06	2.4584e-05	5.3543e-05
P27773	Tpd52l1	Tumor protein D53	TPD53_MOUSE	2.14487	6.0699e-06	2.45947e-05	0.00120304
P63239	Ccar1	Cell division cycle and apoptosis regulator protein 1	CCAR1_MOUSE	-inf	6.08995e-06	2.46585e-05	6.61347e-06
Q07646	Mical1	[F-actin]-monooxygenase MICAL1	MICA1_MOUSE	-inf	6.10873e-06	2.47169e-05	5.6644e-06
Q922B1	Pir	Pirin	PIR_MOUSE	-inf	6.1164e-06	2.47304e-05	2.95516e-05
Q99LJ0	Endog	Endonuclease G, mitochondrial	NUCG_MOUSE	-inf	6.13251e-06	2.47779e-05	1.40571e-06
Q9JJ43	Lzic	Protein LZIC	LZIC_MOUSE	-inf	6.16515e-06	2.48673e-05	1.72817e-05
Q5DQR4	Use1	Vesicle transport protein USE1	USE1_MOUSE	-1.50573	6.16601e-06	2.48673e-05	5.84353e-05
P70670	Mrpl53	39S ribosomal protein L53, mitochondrial	RM53_MOUSE	-inf	6.16771e-06	2.48673e-05	8.86405e-05
Q8BHS6	Gpt2	Alanine aminotransferase 2	ALAT2_MOUSE	-inf	6.19847e-06	2.49585e-05	1.06729e-05
Q91YE3	Fgfr1op2	FGFR1 oncogene partner 2 homolog	FGOP2_MOUSE	-inf	6.20111e-06	2.49585e-05	4.2552e-06
Q8BHD7	Rnf123	E3 ubiquitin-protein ligase RNF123	RN123_MOUSE	-inf	6.20347e-06	2.49585e-05	9.01594e-06
Q9JKF1	Jakmip3	Janus kinase and microtubule-interacting protein 3	JKIP3_MOUSE	-inf	6.26031e-06	2.51694e-05	5.4075e-06
Q8R2Z5	Tbce	Tubulin-specific chaperone E	TBCE_MOUSE	-inf	6.28928e-06	2.5253e-05	6.37658e-06
Q8R1H0	Extl2	Exostosin-like 2	EXTL2_MOUSE	-inf	6.28997e-06	2.5253e-05	3.59817e-06
Q9CQS8	Eif3a	Eukaryotic translation initiation factor 3 subunit A	EIF3A_MOUSE	-0.996868	6.30146e-06	2.52813e-05	6.04655e-05
Q76LS9	Ormdl3	ORM1-like protein 3	ORML3_MOUSE	-inf	6.31856e-06	2.53321e-05	1.58543e-05
E9PVA8	Tmub1	Transmembrane and ubiquitin-like domain-containing protein 1	TMUB1_MOUSE	-inf	6.32576e-06	2.5334e-05	1.22652e-05
B2RR83	Stx4	Syntaxin-4	STX4_MOUSE	-inf	6.32794e-06	2.5334e-05	3.73294e-06
P63280	Cavin1	Caveolae-associated protein 1	CAVN1_MOUSE	-inf	6.34029e-06	2.53656e-05	9.18214e-05
Q4FK66	Rab8a	Ras-related protein Rab-8A	RAB8A_MOUSE	-inf	6.35011e-06	2.53722e-05	8.93237e-06
Q8BVY0	Hdac2	Histone deacetylase 2	HDAC2_MOUSE	-inf	6.35084e-06	2.53722e-05	5.88529e-06
P97819	Rbm17	Splicing factor 45	SPF45_MOUSE	-inf	6.36333e-06	2.54043e-05	2.29368e-06
Q9D7H3	Rbp1	Retinol-binding protein 1	RET1_MOUSE	-inf	6.38519e-06	2.54737e-05	4.13931e-05
Q9CQF4	Lama1	Laminin subunit alpha-1	LAMA1_MOUSE	-inf	6.41898e-06	2.55609e-05	1.95923e-05
Q3UV70	Appl2	DCC-interacting protein 13-beta	DP13B_MOUSE	-inf	6.42456e-06	2.55609e-05	3.79948e-05
P58044	Map4k2	Mitogen-activated protein kinase kinase kinase kinase 2	M4K2_MOUSE	-inf	6.42578e-06	2.55609e-05	3.5327e-05
Q8VD75	Tubb2a	Tubulin beta-2A chain	TBB2A_MOUSE	-inf	6.42937e-06	2.55609e-05	1.21314e-05
P48320	Fxr1	Fragile X mental retardation syndrome-related protein 1	FXR1_MOUSE	-2.90965	6.42947e-06	2.55609e-05	0.000352892
Q9JK42	Birc6	Baculoviral IAP repeat-containing protein 6	BIRC6_MOUSE	-inf	6.46082e-06	2.56676e-05	6.08521e-05
Q8R554	Cpsf6	Cleavage and polyadenylation specificity factor subunit 6	CPSF6_MOUSE	-inf	6.48477e-06	2.57447e-05	1.2337e-05
Q8K2C6	Eif3f	Eukaryotic translation initiation factor 3 subunit F	EIF3F_MOUSE	-inf	6.49014e-06	2.57481e-05	3.56608e-05
E9PZ19	Gcc2	GRIP and coiled-coil domain-containing protein 2	GCC2_MOUSE	-inf	6.49869e-06	2.57641e-05	1.03148e-05
Q9D853	Nde1	Nuclear distribution protein nudE homolog 1	NDE1_MOUSE	-inf	6.54603e-06	2.59338e-05	3.83804e-06
Q920R0	Stambp	STAM-binding protein	STABP_MOUSE	-inf	6.58638e-06	2.6047e-05	4.83816e-06
Q6PAM1	Ndufb1	NADH dehydrogenase [ubiquinone] 1 beta subcomplex subunit 1	NDUB1_MOUSE	-inf	6.59124e-06	2.6047e-05	5.70771e-05
Q64444	Dnajb14	DnaJ homolog subfamily B member 14	DJB14_MOUSE	-inf	6.59164e-06	2.6047e-05	1.46506e-05
Q9CZX7	Caly	Neuron-specific vesicular protein calcyon	CALY_MOUSE	-inf	6.59704e-06	2.6047e-05	1.16134e-05
Q8BTY1	Rasgrp2	RAS guanyl-releasing protein 2	GRP2_MOUSE	-inf	6.59747e-06	2.6047e-05	9.95511e-06
Q9D404	Nudt7	Peroxisomal coenzyme A diphosphatase NUDT7	NUDT7_MOUSE	-inf	6.60574e-06	2.60616e-05	1.64644e-05
Q9CPR1	Hadhb	Trifunctional enzyme subunit beta, mitochondrial	ECHB_MOUSE	-inf	6.63484e-06	2.61583e-05	6.43968e-06
Q91WG5	Gabra3	Gamma-aminobutyric acid receptor subunit alpha-3	GBRA3_MOUSE	-inf	6.64129e-06	2.61656e-05	1.07703e-05
Q5HZI2	Atg5	Autophagy protein 5	ATG5_MOUSE	-inf	6.65358e-06	2.61959e-05	2.71795e-05
Q923S9	Arpp21	cAMP-regulated phosphoprotein 21	ARP21_MOUSE	-inf	6.67211e-06	2.62507e-05	1.56256e-05
Q8BG18	Rab10	Ras-related protein Rab-10	RAB10_MOUSE	-inf	6.68262e-06	2.62739e-05	4.19579e-05
Q8BNN1	Mief1	Mitochondrial dynamics protein MID51	MID51_MOUSE	-inf	6.68908e-06	2.62812e-05	7.58609e-05
Q9EQN3	Il33	Interleukin-33	IL33_MOUSE	-inf	6.70828e-06	2.63278e-05	3.09033e-05
Q3UMB5	Dock5	Dedicator of cytokinesis protein 5	DOCK5_MOUSE	2.32805	6.71018e-06	2.63278e-05	0.000119932
Q9WTX6	Sec22a	Vesicle-trafficking protein SEC22a	SC22A_MOUSE	-inf	6.72707e-06	2.63759e-05	3.04354e-05
Q9DAU1	Chac2	Putative glutathione-specific gamma-glutamylcyclotransferase 2	CHAC2_MOUSE	3.32559	6.73527e-06	2.63898e-05	6.06139e-05
Q9Z2X1	Ctnna1	Catenin alpha-1	CTNA1_MOUSE	-inf	6.78163e-06	2.65474e-05	2.95279e-05
Q9QZE7	Lgals9	Galectin-9	LEG9_MOUSE	-inf	6.78681e-06	2.65474e-05	1.24188e-05
P60824	Edc3	Enhancer of mRNA-decapping protein 3	EDC3_MOUSE	-inf	6.78947e-06	2.65474e-05	5.57362e-05
Q8BWT1	Mon1b	Vacuolar fusion protein MON1 homolog B	MON1B_MOUSE	-2.33067	6.79463e-06	2.65494e-05	0.000164159
P18608	Alpl	Alkaline phosphatase, tissue-nonspecific isozyme	PPBT_MOUSE	-inf	6.80554e-06	2.65574e-05	6.01691e-06
Q8K0D0	Anapc1	Anaphase-promoting complex subunit 1	APC1_MOUSE	-inf	6.80601e-06	2.65574e-05	1.22437e-05
Q66GT5	Ube2g1	Ubiquitin-conjugating enzyme E2 G1	UB2G1_MOUSE	-inf	6.81477e-06	2.65734e-05	1.51477e-05
A2APV2	Clmn	Calmin	CLMN_MOUSE	-inf	6.83479e-06	2.66199e-05	1.75187e-05
Q8VDD8	Selenoo	Protein adenylyltransferase SelO, mitochondrial	SELO_MOUSE	4.62215	6.83604e-06	2.66199e-05	0.000141247
P29391	Tmem63a	CSC1-like protein 1	CSCL1_MOUSE	-inf	6.86873e-06	2.67289e-05	8.9913e-05
Q9EPC1	Dmd	Dystrophin	DMD_MOUSE	-inf	6.89084e-06	2.67906e-05	7.78212e-06
Q9QUG9	Arhgef9	Rho guanine nucleotide exchange factor 9	ARHG9_MOUSE	-inf	6.89566e-06	2.67906e-05	0.000100994
Q9Z2L6	Tusc3	Tumor suppressor candidate 3	TUSC3_MOUSE	-inf	6.89929e-06	2.67906e-05	4.41242e-06
Q5XG69	Sdsl	Serine dehydratase-like	SDSL_MOUSE	-inf	6.90675e-06	2.67906e-05	2.22396e-05
Q80VQ0	Tbc1d9b	TBC1 domain family member 9B	TBC9B_MOUSE	-inf	6.90809e-06	2.67906e-05	2.61925e-05
Q91V57	Slc30a9	Zinc transporter 9	ZNT9_MOUSE	-inf	6.93075e-06	2.68493e-05	1.11716e-05
Q91YI0	Stard10	START domain-containing protein 10	STA10_MOUSE	-inf	6.93735e-06	2.68493e-05	2.20289e-05
P51655	Ubxn1	UBX domain-containing protein 1	UBXN1_MOUSE	-inf	6.93737e-06	2.68493e-05	1.16737e-05
Q7TNS7	Romo1	Reactive oxygen species modulator 1	ROMO1_MOUSE	-inf	6.95758e-06	2.69092e-05	3.7459e-06
Q8K0V2	Gfm2	Ribosome-releasing factor 2, mitochondrial	RRF2M_MOUSE	-inf	6.97634e-06	2.69635e-05	6.18261e-06
Q91X58	Tsta3	GDP-L-fucose synthase	FCL_MOUSE	-inf	6.98126e-06	2.69642e-05	1.09318e-05
O35526	Nek9	Serine/threonine-protein kinase Nek9	NEK9_MOUSE	-1.89289	7.02213e-06	2.71037e-05	0.000404392
Q9EPB4	Kctd1;Kctd21	BTB/POZ domain-containing protein KCTD1;BTB/POZ domain-containing protein KCTD21	KCTD1_MOUSE;KCD21_MOUSE	-inf	7.03862e-06	2.7149e-05	4.73945e-06
Q8R3N6	Strip2	Striatin-interacting proteins 2	STRP2_MOUSE	-inf	7.09957e-06	2.73589e-05	1.55564e-06
Q9D8X1	Naa25	N-alpha-acetyltransferase 25, NatB auxiliary subunit	NAA25_MOUSE	-inf	7.10265e-06	2.73589e-05	1.30187e-05
Q9D1N9	Spred2	Sprouty-related, EVH1 domain-containing protein 2	SPRE2_MOUSE	-inf	7.11181e-06	2.73757e-05	9.31622e-06
P31230	Pik3ca	Phosphatidylinositol 4,5-bisphosphate 3-kinase catalytic subunit alpha isoform	PK3CA_MOUSE	-inf	7.1903e-06	2.76591e-05	4.37235e-05
Q9R118	Sco2	Protein SCO2 homolog, mitochondrial	SCO2_MOUSE	-inf	7.20251e-06	2.76847e-05	1.08142e-05
Q9D020	Pgs1	CDP-diacylglycerol--glycerol-3-phosphate 3-phosphatidyltransferase, mitochondrial	PGPS1_MOUSE	-inf	7.21434e-06	2.76847e-05	1.23436e-05
P63089	Mkrn2	Probable E3 ubiquitin-protein ligase makorin-2	MKRN2_MOUSE	-inf	7.2161e-06	2.76847e-05	3.34949e-05
P58242	Wipi2	WD repeat domain phosphoinositide-interacting protein 2	WIPI2_MOUSE	-inf	7.2164e-06	2.76847e-05	2.2982e-05
Q80YA7	Nudc	Nuclear migration protein nudC	NUDC_MOUSE	-inf	7.22165e-06	2.76862e-05	9.38953e-06
P12960	Cbx3	Chromobox protein homolog 3	CBX3_MOUSE	-2.77986	7.22739e-06	2.76896e-05	0.000512953
Q5IRJ6	Pgam5	Serine/threonine-protein phosphatase PGAM5, mitochondrial	PGAM5_MOUSE	-inf	7.24449e-06	2.77365e-05	3.50235e-05
O70174	Mrpl9	39S ribosomal protein L9, mitochondrial	RM09_MOUSE	3.72548	7.27934e-06	2.78512e-05	2.0597e-05
O88444	Pitpnc1	Cytoplasmic phosphatidylinositol transfer protein 1	PITC1_MOUSE	1.69925	7.28628e-06	2.7859e-05	2.64478e-05
B1AZA5	Mocs2	Molybdopterin synthase catalytic subunit,Molybdopterin synthase sulfur carrier subunit	MOC2B_MOUSE	-inf	7.30683e-06	2.79189e-05	3.99606e-06
Q8QZY9	Efnb3	Ephrin-B3	EFNB3_MOUSE	-inf	7.31657e-06	2.79373e-05	7.15114e-06
Q924T7	Naa10	N-alpha-acetyltransferase 10	NAA10_MOUSE	-inf	7.32567e-06	2.79533e-05	4.96059e-06
Q6PGL7	Pde6d	Retinal rod rhodopsin-sensitive cGMP 3',5'-cyclic phosphodiesterase subunit delta	PDE6D_MOUSE	-inf	7.38124e-06	2.81465e-05	9.12221e-06
P52795	Npdc1	Neural proliferation differentiation and control protein 1	NPDC1_MOUSE	-inf	7.41107e-06	2.82397e-05	5.18302e-06
P56942	Cops7b	COP9 signalosome complex subunit 7b	CSN7B_MOUSE	-inf	7.41559e-06	2.82397e-05	1.2761e-05
Q80TT2	Tomm6	Mitochondrial import receptor subunit TOM6 homolog	TOM6_MOUSE	-inf	7.44568e-06	2.83248e-05	1.32115e-05
Q99LB6	Hs2st1	Heparan sulfate 2-O-sulfotransferase 1	HS2ST_MOUSE	-inf	7.44816e-06	2.83248e-05	7.88186e-05
Q9QX60	Cerk	Ceramide kinase	CERK1_MOUSE	-inf	7.45285e-06	2.83248e-05	1.3146e-05
P63024	Kctd4	BTB/POZ domain-containing protein KCTD4	KCTD4_MOUSE	-inf	7.47569e-06	2.83927e-05	1.29789e-05
Q99MN1	Sardh	Sarcosine dehydrogenase, mitochondrial	SARDH_MOUSE	-inf	7.49823e-06	2.84593e-05	5.88325e-05
Q8C4B4	Rap1b	Ras-related protein Rap-1b	RAP1B_MOUSE	-inf	7.5098e-06	2.84842e-05	3.22985e-06
Q6PDG8	Tspan9	Tetraspanin-9	TSN9_MOUSE	-inf	7.51998e-06	2.84917e-05	1.78784e-06
O55003	Anxa11	Annexin A11	ANX11_MOUSE	-inf	7.52177e-06	2.84917e-05	1.86019e-05
P97370	Hmgb2	High mobility group protein B2	HMGB2_MOUSE	-3.42983	7.52753e-06	2.84946e-05	0.0001993
O70566	Me1	NADP-dependent malic enzyme	MAOX_MOUSE	-inf	7.53935e-06	2.85204e-05	4.35613e-05
Q3U5F4	Atp6v1b2	V-type proton ATPase subunit B, brain isoform	VATB2_MOUSE	-inf	7.5793e-06	2.86525e-05	7.24229e-06
O08915	Myo9a	Unconventional myosin-IXa	MYO9A_MOUSE	-inf	7.58548e-06	2.86568e-05	3.82144e-05
Q9Z1Q5	Ngb	Neuroglobin	NGB_MOUSE	-inf	7.60726e-06	2.872e-05	1.47865e-05
Q3UMB9	Atg14	Beclin 1-associated autophagy-related key regulator	BAKOR_MOUSE	-inf	7.63128e-06	2.87762e-05	5.5161e-06
Q5SW19	Paf1	RNA polymerase II-associated factor 1 homolog	PAF1_MOUSE	-inf	7.63224e-06	2.87762e-05	1.3059e-05
Q8K1A6	Ndufa11	NADH dehydrogenase [ubiquinone] 1 alpha subcomplex subunit 11	NDUAB_MOUSE	-inf	7.64791e-06	2.88162e-05	1.41013e-05
O70572	Wdr45b	WD repeat domain phosphoinositide-interacting protein 3	WIPI3_MOUSE	-inf	7.68907e-06	2.89365e-05	4.47438e-06
Q9CW79	Sfxn4	Sideroflexin-4	SFXN4_MOUSE	-inf	7.69232e-06	2.89365e-05	3.00622e-06
Q5SUE8	Arrb2	Beta-arrestin-2	ARRB2_MOUSE	-inf	7.69507e-06	2.89365e-05	2.15384e-06
Q6PB90	Zfyve27	Protrudin	ZFY27_MOUSE	-inf	7.70101e-06	2.89397e-05	6.51558e-06
Q9JJL8	Cers2	Ceramide synthase 2	CERS2_MOUSE	-inf	7.72594e-06	2.90143e-05	8.87687e-06
Q09LZ8	Cdkn2aip	CDKN2A-interacting protein	CARF_MOUSE	-inf	7.75219e-06	2.90937e-05	5.82713e-06
Q9QWR8	Pdp1	[Pyruvate dehydrogenase [acetyl-transferring]]-phosphatase 1, mitochondrial	PDP1_MOUSE	-inf	7.75967e-06	2.91026e-05	1.40775e-05
Q3TZM9	Rpap1	RNA polymerase II-associated protein 1	RPAP1_MOUSE	-inf	7.77277e-06	2.91326e-05	3.64759e-06
Q68FF0	Coq6	Ubiquinone biosynthesis monooxygenase COQ6, mitochondrial	COQ6_MOUSE	-inf	7.77817e-06	2.91336e-05	2.44132e-06
Q8K4R4	Ccdc85b	Coiled-coil domain-containing protein 85B	CC85B_MOUSE	-inf	7.78907e-06	2.91553e-05	4.50636e-05
Q8BTE0	Vipas39	Spermatogenesis-defective protein 39 homolog	SPE39_MOUSE	-inf	7.81437e-06	2.92308e-05	1.02387e-05
P35550	Slc35d3	Solute carrier family 35 member D3	S35D3_MOUSE	-inf	7.82275e-06	2.92429e-05	1.42997e-05
Q1HFZ0	Cnot3	CCR4-NOT transcription complex subunit 3	CNOT3_MOUSE	-inf	7.8302e-06	2.92516e-05	5.01235e-06
Q8VEL9	tuba	Tubulin alpha chain	TBA_XENLA	-inf	7.87816e-06	2.94115e-05	5.24783e-05
Q69ZK0	Cpsf7	Cleavage and polyadenylation specificity factor subunit 7	CPSF7_MOUSE	-inf	7.88826e-06	2.94299e-05	7.08985e-06
Q9WUB0	Puf60	Poly(U)-binding-splicing factor PUF60	PUF60_MOUSE	-inf	7.92678e-06	2.95421e-05	9.60434e-06
Q9QUJ7	Ephb3	Ephrin type-B receptor 3	EPHB3_MOUSE	-inf	7.931e-06	2.95421e-05	5.9634e-06
Q69ZP3	Shoc2	Leucine-rich repeat protein SHOC-2	SHOC2_MOUSE	-inf	7.9471e-06	2.95421e-05	2.53738e-05
Q8BLY2	Oxt	Oxytocin-neurophysin 1	NEU1_MOUSE	-inf	7.94754e-06	2.95421e-05	2.74717e-05
Q920P3	Tuba3a	Tubulin alpha-3 chain	TBA3_MOUSE	-inf	7.9493e-06	2.95421e-05	1.79299e-05
Q0KL01	Surf1	Surfeit locus protein 1	SURF1_MOUSE	-inf	7.94944e-06	2.95421e-05	1.43577e-05
Q99LS3	Atg13	Autophagy-related protein 13	ATG13_MOUSE	-inf	7.96129e-06	2.95547e-05	3.66251e-05
Q9CQE7	Ak5	Adenylate kinase isoenzyme 5	KAD5_MOUSE	-inf	7.96322e-06	2.95547e-05	6.28873e-06
Q99LB7	Lyrm9	LYR motif-containing protein 9	LYRM9_MOUSE	-inf	7.97287e-06	2.9567e-05	6.27025e-06
B2RUR8	Trp53i11	Tumor protein p53-inducible protein 11	P5I11_MOUSE	-inf	7.97691e-06	2.9567e-05	3.91167e-06
O35304	Syne1	Nesprin-1	SYNE1_MOUSE	-inf	8.02117e-06	2.97117e-05	1.18473e-05
Q61704	Glra1	Glycine receptor subunit alpha-1	GLRA1_MOUSE	-inf	8.0309e-06	2.97284e-05	8.14921e-06
Q9CQT1	Casp3	Caspase-3	CASP3_MOUSE	-inf	8.04497e-06	2.97606e-05	1.47867e-05
O88792	Tbrg4	FAST kinase domain-containing protein 4	FAKD4_MOUSE	-inf	8.05636e-06	2.97606e-05	3.18308e-06
Q8BIV3	Glo1	Lactoylglutathione lyase	LGUL_MOUSE	-inf	8.05935e-06	2.97606e-05	8.35138e-06
P70697	Nudt17	Nucleoside diphosphate-linked moiety X motif 17	NUD17_MOUSE	-inf	8.06048e-06	2.97606e-05	2.5713e-05
P60202	Limk1	LIM domain kinase 1	LIMK1_MOUSE	-inf	8.0873e-06	2.98242e-05	0.00955878
Q9CXU9	Luc7l	Putative RNA-binding protein Luc7-like 1	LUC7L_MOUSE	-inf	8.08819e-06	2.98242e-05	5.09292e-05
P59016	Ncoa5	Nuclear receptor coactivator 5	NCOA5_MOUSE	-inf	8.10446e-06	2.98649e-05	2.43919e-05
Q8C0J2	Arxes1;Arxes2	Adipocyte-related X-chromosome expressed sequence 1;Adipocyte-related X-chromosome expressed sequence 2	ARXS1_MOUSE;ARXS2_MOUSE	-inf	8.12267e-06	2.98769e-05	3.97996e-06
Q3TDD9	Mvd	Diphosphomevalonate decarboxylase	MVD1_MOUSE	-inf	8.13488e-06	2.98769e-05	2.1689e-05
Q921M4	Ccdc13	Coiled-coil domain-containing protein 13	CCD13_MOUSE	-inf	8.13554e-06	2.98769e-05	5.56854e-06
Q60847	Tmem63c	Calcium permeable stress-gated cation channel 1	CSC1_MOUSE	-inf	8.13707e-06	2.98769e-05	2.57249e-06
Q9CQU3	Clgn	Calmegin	CLGN_MOUSE	-inf	8.13748e-06	2.98769e-05	1.03916e-05
P61222	Bbs4	Bardet-Biedl syndrome 4 protein homolog	BBS4_MOUSE	-inf	8.14415e-06	2.98769e-05	2.66253e-05
O88796	Magi3	Membrane-associated guanylate kinase, WW and PDZ domain-containing protein 3	MAGI3_MOUSE	-inf	8.14442e-06	2.98769e-05	2.83692e-06
E9Q4S1	Slc25a23	Calcium-binding mitochondrial carrier protein SCaMC-3	SCMC3_MOUSE	-inf	8.1504e-06	2.98796e-05	1.06298e-05
O88602	Fbxo45	F-box/SPRY domain-containing protein 1	FBSP1_MOUSE	-inf	8.17545e-06	2.99354e-05	2.24574e-05
Q61543	Prcp	Lysosomal Pro-X carboxypeptidase	PCP_MOUSE	-inf	8.17626e-06	2.99354e-05	2.45952e-05
Q8CG72	Limch1	LIM and calponin homology domains-containing protein 1	LIMC1_MOUSE	-inf	8.18138e-06	2.99354e-05	3.31484e-05
Q9CZJ0	Atl1	Atlastin-1	ATLA1_MOUSE	-inf	8.19675e-06	2.99566e-05	7.68396e-06
Q8VCL2	Fbxl15	F-box/LRR-repeat protein 15	FXL15_MOUSE	-inf	8.20346e-06	2.99566e-05	5.28974e-06
Q3UEB3	Lama2	Laminin subunit alpha-2	LAMA2_MOUSE	-inf	8.20792e-06	2.99566e-05	4.1395e-05
Q6P8X1	Ptgs1	Prostaglandin G/H synthase 1	PGH1_MOUSE	0.336973	8.20822e-06	2.99566e-05	7.35941e-05
Q91YN5	Smarce1	SWI/SNF-related matrix-associated actin-dependent regulator of chromatin subfamily E member 1	SMCE1_MOUSE	-inf	8.2272e-06	3.00066e-05	6.76949e-06
Q9R0Y5	Tsnax	Translin-associated protein X	TSNAX_MOUSE	-2.91478	8.25843e-06	3.01013e-05	0.000528191
P02089	Ufl1	E3 UFM1-protein ligase 1	UFL1_MOUSE	-inf	8.28114e-06	3.01647e-05	0.0014304
Q80TI0	Vps16	Vacuolar protein sorting-associated protein 16 homolog	VPS16_MOUSE	-inf	8.28962e-06	3.01763e-05	7.75597e-06
Q8C015	Mri1	Methylthioribose-1-phosphate isomerase	MTNA_MOUSE	-inf	8.31392e-06	3.02193e-05	5.73714e-06
Q923X4	Ythdc2	3'-5' RNA helicase YTHDC2	YTDC2_MOUSE	-inf	8.31442e-06	3.02193e-05	6.2426e-06
Q924S7	Ppcs	Phosphopantothenate--cysteine ligase	PPCS_MOUSE	-inf	8.32033e-06	3.02193e-05	2.82071e-06
P36536	Mrps24	28S ribosomal protein S24, mitochondrial	RT24_MOUSE	1.18768	8.32263e-06	3.02193e-05	6.62542e-05
Q9WTR6	Asap2	Arf-GAP with SH3 domain, ANK repeat and PH domain-containing protein 2	ASAP2_MOUSE	-inf	8.3421e-06	3.02696e-05	9.5862e-06
Q9JKV5	Miga2	Mitoguardin 2	MIGA2_MOUSE	1.75907	8.34713e-06	3.02696e-05	0.00015739
Q99P88	Olfm2	Noelin-2	NOE2_MOUSE	-inf	8.3853e-06	3.03887e-05	6.8195e-06
Q8K596	Bet1	BET1 homolog	BET1_MOUSE	-1.62455	8.39722e-06	3.04126e-05	0.000700149
O70194	Vma21	Vacuolar ATPase assembly integral membrane protein Vma21	VMA21_MOUSE	-inf	8.4171e-06	3.04339e-05	3.07847e-05
Q6VNS1	Vps33a	Vacuolar protein sorting-associated protein 33A	VP33A_MOUSE	-inf	8.41845e-06	3.04339e-05	2.17184e-05
Q9JM63	Ano10	Anoctamin-10	ANO10_MOUSE	-inf	8.42096e-06	3.04339e-05	4.776e-05
Q8BHG1	Cyp20a1	Cytochrome P450 20A1	CP20A_MOUSE	-inf	8.42448e-06	3.04339e-05	1.59125e-05
Q921H9	Sgta	Small glutamine-rich tetratricopeptide repeat-containing protein alpha	SGTA_MOUSE	-inf	8.43154e-06	3.04401e-05	3.13807e-05
Q8CCJ3	Tsc22d3	TSC22 domain family protein 3	T22D3_MOUSE	-inf	8.445e-06	3.04694e-05	6.70311e-06
P54818	Dennd5b	DENN domain-containing protein 5B	DEN5B_MOUSE	-inf	8.47266e-06	3.05473e-05	4.07894e-06
Q3TH73	Gstm7	Glutathione S-transferase Mu 7	GSTM7_MOUSE	-inf	8.47731e-06	3.05473e-05	9.46373e-06
Q7TSK2	Ppp3cc	Serine/threonine-protein phosphatase 2B catalytic subunit gamma isoform	PP2BC_MOUSE	-inf	8.48383e-06	3.05514e-05	1.02138e-05
Q8R0Y6	Ntng2	Netrin-G2	NTNG2_MOUSE	-inf	8.49246e-06	3.05632e-05	9.09524e-05
D3YV10	Thrap3	Thyroid hormone receptor-associated protein 3	TR150_MOUSE	-inf	8.50938e-06	3.05951e-05	2.95674e-05
D3Z7H4	Hdgfl2	Hepatoma-derived growth factor-related protein 2	HDGR2_MOUSE	-inf	8.51362e-06	3.05951e-05	1.09436e-05
Q9CWU6	Ogfod1	Prolyl 3-hydroxylase OGFOD1	OGFD1_MOUSE	-inf	8.51866e-06	3.05951e-05	1.83132e-05
Q8K1Z0	Tubb2b	Tubulin beta-2B chain	TBB2B_MOUSE	-inf	8.52282e-06	3.05951e-05	6.03795e-05
P70362	Pet117	Protein PET117 homolog, mitochondrial	PT117_MOUSE	-inf	8.56853e-06	3.07399e-05	2.43437e-05
Q9DCT1	Syn2	Synapsin-2	SYN2_MOUSE	-inf	8.6179e-06	3.08975e-05	2.00127e-05
Q3TLS3	Creg1	Protein CREG1	CREG1_MOUSE	-inf	8.63742e-06	3.0948e-05	1.27591e-05
Q99JX4	Entpd1	Ectonucleoside triphosphate diphosphohydrolase 1	ENTP1_MOUSE	-inf	8.64965e-06	3.09724e-05	2.17138e-05
Q8R2U0	Cck	Cholecystokinin	CCKN_MOUSE	-inf	8.69249e-06	3.11062e-05	6.47123e-06
Q8K3F6	Rab33b	Ras-related protein Rab-33B	RB33B_MOUSE	-inf	8.72884e-06	3.12167e-05	4.53263e-06
P62080	Dcun1d3	DCN1-like protein 3	DCNL3_MOUSE	-inf	8.7468e-06	3.12613e-05	1.28475e-05
Q9WTK3	Cacng3	Voltage-dependent calcium channel gamma-3 subunit	CCG3_MOUSE	3.10643	8.77664e-06	3.13483e-05	2.25119e-05
Q3UFF7	Dlgap1	Disks large-associated protein 1	DLGP1_MOUSE	-inf	8.79873e-06	3.14075e-05	1.06093e-05
Q9QZB0	Egln1	Egl nine homolog 1	EGLN1_MOUSE	-inf	8.81809e-06	3.14398e-05	3.57488e-05
Q9Z172	Stk32c	Serine/threonine-protein kinase 32C	ST32C_MOUSE	-inf	8.81882e-06	3.14398e-05	0.000165369
Q32NY4	Ttbk1	Tau-tubulin kinase 1	TTBK1_MOUSE	-inf	8.82557e-06	3.14442e-05	5.50325e-06
P70444	Vps36	Vacuolar protein-sorting-associated protein 36	VPS36_MOUSE	-inf	8.83465e-06	3.14569e-05	4.61485e-06
Q64008	Hdhd3	Haloacid dehalogenase-like hydrolase domain-containing protein 3	HDHD3_MOUSE	-inf	8.8908e-06	3.1637e-05	2.56374e-06
Q8K0D7	Anapc2	Anaphase-promoting complex subunit 2	ANC2_MOUSE	-inf	8.96061e-06	3.18655e-05	9.94009e-06
Q9Z0H4	Coq7	5-demethoxyubiquinone hydroxylase, mitochondrial,5-demethoxyubiquinone hydroxylase, mitochondrial (Fragment)	COQ7_MOUSE	-inf	9.01959e-06	3.20553e-05	9.49226e-05
P63248	Pank3	Pantothenate kinase 3	PANK3_MOUSE	-inf	9.03919e-06	3.21049e-05	3.27823e-05
P70207	Ddx46	Probable ATP-dependent RNA helicase DDX46	DDX46_MOUSE	-inf	9.08536e-06	3.2248e-05	1.11486e-05
Q8BQ47	Wdr20	WD repeat-containing protein 20	WDR20_MOUSE	-inf	9.09081e-06	3.2248e-05	3.81237e-06
Q8BLC3	Dnajc7	DnaJ homolog subfamily C member 7	DNJC7_MOUSE	-inf	9.10015e-06	3.22611e-05	1.12415e-05
Q61464	Fam49b	Protein FAM49B	FA49B_MOUSE	-inf	9.11485e-06	3.22931e-05	6.16895e-06
Q9Z280	Ddrgk1	DDRGK domain-containing protein 1	DDRGK_MOUSE	-inf	9.14063e-06	3.23643e-05	3.73386e-06
O54692	Hnrnpm	Heterogeneous nuclear ribonucleoprotein M	HNRPM_MOUSE	-inf	9.16287e-06	3.24229e-05	5.9565e-06
P24452	Plp1;PLP1,PLP1	Myelin proteolipid protein;Myelin proteolipid protein,Patatin-like protein 1	MYPR_MOUSE;MYPR_HUMAN,PLP1_ARATH	-inf	9.2098e-06	3.25687e-05	1.98819e-06
G5E870	Parl	Presenilins-associated rhomboid-like protein, mitochondrial	PARL_MOUSE	-inf	9.26075e-06	3.27044e-05	6.52237e-06
Q8BQU6	Cr1l	Complement component receptor 1-like protein	CR1L_MOUSE	-inf	9.26266e-06	3.27044e-05	3.31751e-06
Q8BUK6	Kif3b	Kinesin-like protein KIF3B	KIF3B_MOUSE	-2.52061	9.26888e-06	3.27044e-05	2.76004e-05
P09602	Ppp1r3f	Protein phosphatase 1 regulatory subunit 3F	PPR3F_MOUSE	-inf	9.27112e-06	3.27044e-05	3.10376e-05
Q9JL26	Ksr2	Kinase suppressor of Ras 2	KSR2_MOUSE	-inf	9.28764e-06	3.27366e-05	8.97436e-06
A2A432	Sbds	Ribosome maturation protein SBDS	SBDS_MOUSE	-inf	9.29175e-06	3.27366e-05	2.41769e-05
P63143	Epb41	Protein 4.1	41_MOUSE	-inf	9.29755e-06	3.27368e-05	2.29524e-05
Q5U4F6	Yars	Tyrosine--tRNA ligase, cytoplasmic	SYYC_MOUSE	-inf	9.30853e-06	3.27552e-05	3.0008e-06
Q80U19	Naprt	Nicotinate phosphoribosyltransferase	PNCB_MOUSE	-inf	9.35887e-06	3.2912e-05	1.26834e-05
Q9EQU5	Mrps28	28S ribosomal protein S28, mitochondrial	RT28_MOUSE	-inf	9.37502e-06	3.29485e-05	9.73884e-05
Q9WUD8	Csdc2	Cold shock domain-containing protein C2	CSDC2_MOUSE	-inf	9.39048e-06	3.29825e-05	6.49424e-06
Q61599	Cryzl1	Quinone oxidoreductase-like protein 1	QORL1_MOUSE	-inf	9.41356e-06	3.30431e-05	3.33099e-05
Q8C050	Kcnc2	Potassium voltage-gated channel subfamily C member 2	KCNC2_MOUSE	-inf	9.45538e-06	3.31695e-05	2.63394e-05
Q8BGN8	Rragc	Ras-related GTP-binding protein C	RRAGC_MOUSE	-inf	9.51595e-06	3.33615e-05	8.80518e-05
P97333	Atp5f1e	ATP synthase subunit epsilon, mitochondrial	ATP5E_MOUSE	-inf	9.53626e-06	3.34121e-05	2.03393e-06
Q6PD10	Gnaz	Guanine nucleotide-binding protein G(z) subunit alpha	GNAZ_MOUSE	-inf	9.57844e-06	3.35392e-05	4.06357e-06
Q9Z2N8	Lamb2	Laminin subunit beta-2	LAMB2_MOUSE	-inf	9.61392e-06	3.36428e-05	6.38854e-06
Q6PD28	Igsf1	Immunoglobulin superfamily member 1	IGSF1_MOUSE	-inf	9.62441e-06	3.36549e-05	3.92704e-05
Q05909	Fbxo6	F-box only protein 6	FBX6_MOUSE	-inf	9.62918e-06	3.36549e-05	6.77957e-06
Q5DTT2	Exoc6	Exocyst complex component 6	EXOC6_MOUSE	-inf	9.63745e-06	3.36631e-05	2.18631e-05
P08775	Shh;SHH	Sonic hedgehog protein	SHH_MOUSE;SHH_HUMAN	-inf	9.66005e-06	3.37207e-05	4.46058e-06
Q6PAM0	Arhgdib	Rho GDP-dissociation inhibitor 2	GDIR2_MOUSE	-inf	9.66577e-06	3.37207e-05	1.66922e-05
Q4VAA7	Kcnj10	ATP-sensitive inward rectifier potassium channel 10	KCJ10_MOUSE	-inf	9.68457e-06	3.37656e-05	1.92308e-05
Q8VEB6	Dusp15	Dual specificity protein phosphatase 15	DUS15_MOUSE	-inf	9.69054e-06	3.37658e-05	4.55919e-06
Q8K382	Penk	Proenkephalin-A	PENK_MOUSE	-inf	9.73812e-06	3.38943e-05	7.43374e-06
Q9Z2F7	Nanp	N-acylneuraminate-9-phosphatase	NANP_MOUSE	-inf	9.74173e-06	3.38943e-05	2.48463e-05
Q91VC3	Ift27	Intraflagellar transport protein 27 homolog	IFT27_MOUSE	-inf	9.7483e-06	3.38943e-05	3.94903e-05
Q8BTV1	Oplah	5-oxoprolinase	OPLA_MOUSE	-inf	9.75122e-06	3.38943e-05	8.58864e-06
Q6ZPS6	Arrb1	Beta-arrestin-1	ARRB1_MOUSE	-inf	9.76524e-06	3.39223e-05	3.77602e-06
P21278	Usp54	Inactive ubiquitin carboxyl-terminal hydrolase 54	UBP54_MOUSE	-1.31438	9.79751e-06	3.40137e-05	0.000113144
P18052	Lmtk2	Serine/threonine-protein kinase LMTK2	LMTK2_MOUSE	-inf	9.82787e-06	3.40983e-05	4.12056e-05
Q9CQ71	Smc1a	Structural maintenance of chromosomes protein 1A	SMC1A_MOUSE	-inf	9.83458e-06	3.41008e-05	5.63937e-06
Q9JMG7	Magi2	Membrane-associated guanylate kinase, WW and PDZ domain-containing protein 2	MAGI2_MOUSE	-inf	9.8532e-06	3.41446e-05	0.000122452
Q8R0A5	Htra1	Serine protease HTRA1	HTRA1_MOUSE	-inf	9.87912e-06	3.42136e-05	4.74904e-05
A2A8U2	Efnb2	Ephrin-B2	EFNB2_MOUSE	-inf	9.89634e-06	3.42307e-05	5.24172e-06
P23198	Ranbp2	E3 SUMO-protein ligase RanBP2	RBP2_MOUSE	-inf	9.89759e-06	3.42307e-05	3.96256e-05
Q6PE01	Tgoln1;Tgoln2	Trans-Golgi network integral membrane protein 1;Trans-Golgi network integral membrane protein 2	TGON1_MOUSE;TGON2_MOUSE	-inf	9.90208e-06	3.42307e-05	1.18217e-05
Q60932	Tmem143	Transmembrane protein 143	TM143_MOUSE	-1.85041	9.9215e-06	3.4277e-05	0.00310692
Q9DC51	Gpt	Alanine aminotransferase 1	ALAT1_MOUSE	-inf	9.92773e-06	3.42778e-05	4.48721e-05
Q6PD24	Clint1	Clathrin interactor 1	EPN4_MOUSE	-inf	9.95432e-06	3.43487e-05	8.55992e-06
Q9Z2B9	Ap1s1	AP-1 complex subunit sigma-1A	AP1S1_MOUSE	-inf	9.96835e-06	3.43763e-05	6.76324e-06
Q9QXK3	Fbxl20	F-box/LRR-repeat protein 20	FXL20_MOUSE	-inf	1.00099e-05	3.44988e-05	1.81331e-05
Q80VP9	Cd47	Leukocyte surface antigen CD47	CD47_MOUSE	-inf	1.00305e-05	3.45295e-05	5.33103e-06
Q8C7D2	Ubr3	E3 ubiquitin-protein ligase UBR3	UBR3_MOUSE	-0.555263	1.0031e-05	3.45295e-05	3.02363e-05
Q9D385	Tbck	TBC domain-containing protein kinase-like protein	TBCK_MOUSE	-inf	1.00766e-05	3.46658e-05	3.78846e-06
P62254	Erbin	Erbin	ERBIN_MOUSE	-inf	1.00939e-05	3.47042e-05	1.00892e-05
Q7TPW1	Prkar2a	cAMP-dependent protein kinase type II-alpha regulatory subunit	KAP2_MOUSE	-inf	1.01078e-05	3.47311e-05	2.36149e-05
P58059	Snx17	Sorting nexin-17	SNX17_MOUSE	-inf	1.01187e-05	3.47376e-05	3.48006e-06
Q61120	Acsl3	Long-chain-fatty-acid--CoA ligase 3	ACSL3_MOUSE	-inf	1.01259e-05	3.47376e-05	1.43314e-05
Q9CPR7	Abcf2	ATP-binding cassette sub-family F member 2	ABCF2_MOUSE	-inf	1.0128e-05	3.47376e-05	6.69868e-06
Q8R086	Chmp2a	Charged multivesicular body protein 2a	CHM2A_MOUSE	-inf	1.01555e-05	3.48109e-05	1.63868e-05
Q8BVL3	Abcf3	ATP-binding cassette sub-family F member 3	ABCF3_MOUSE	-inf	1.02053e-05	3.49606e-05	1.20319e-05
Q8BZN6	Rilpl1	RILP-like protein 1	RIPL1_MOUSE	-inf	1.02118e-05	3.49621e-05	1.24158e-05
Q6PB70	stum	Protein stum	STUM_DROME	-inf	1.02277e-05	3.49775e-05	4.42135e-06
Q3U0S6	Ica1l	Islet cell autoantigen 1-like protein	ICA1L_MOUSE	-inf	1.02286e-05	3.49775e-05	1.20869e-06
Q3TRM4	Strada	STE20-related kinase adapter protein alpha	STRAA_MOUSE	-inf	1.02415e-05	3.50003e-05	1.60009e-06
P60761	Eif1a	Eukaryotic translation initiation factor 1A	IF1A_MOUSE	-4.62464	1.02609e-05	3.50457e-05	0.00138518
B9EJI9	Lias	Lipoyl synthase, mitochondrial	LIAS_MOUSE	-inf	1.03297e-05	3.52596e-05	4.66569e-06
Q9JJG0	Sema4a	Semaphorin-4A	SEM4A_MOUSE	-inf	1.03398e-05	3.5273e-05	4.91853e-06
Q80XD1	Egfr	Epidermal growth factor receptor	EGFR_MOUSE	-inf	1.03764e-05	3.5366e-05	7.9273e-06
Q5SSH7	Preb	Prolactin regulatory element-binding protein	PREB_MOUSE	-inf	1.03795e-05	3.5366e-05	7.04488e-06
Q8R4G0	Pdk2	[Pyruvate dehydrogenase (acetyl-transferring)] kinase isozyme 2, mitochondrial	PDK2_MOUSE	-inf	1.03935e-05	3.53689e-05	1.8885e-05
Q9CY73	Setd3	Actin-histidine N-methyltransferase	SETD3_MOUSE	-inf	1.03972e-05	3.53689e-05	6.37956e-06
Q61595	C2cd4cC2CD4 family	C2 calcium-dependent domain-containing protein 4C	C2C4C_MOUSE	-inf	1.0399e-05	3.53689e-05	2.14891e-05
P55937	Mrpl3	39S ribosomal protein L3, mitochondrial	RM03_MOUSE	-inf	1.04587e-05	3.55224e-05	6.66287e-06
Q8BGT5	Mios	GATOR complex protein MIOS	MIO_MOUSE	-inf	1.04588e-05	3.55224e-05	1.06626e-05
Q9CQN3	Rab34	Ras-related protein Rab-34	RAB34_MOUSE	-inf	1.04628e-05	3.55224e-05	8.05037e-05
Q99PU8	Magt1	Magnesium transporter protein 1	MAGT1_MOUSE	-inf	1.05124e-05	3.56653e-05	8.40986e-06
Q9CRA9	Efnb1	Ephrin-B1	EFNB1_MOUSE	-inf	1.05174e-05	3.56653e-05	3.70087e-05
Q6PFR5	Aars2	Alanine--tRNA ligase, mitochondrial	SYAM_MOUSE	-inf	1.05261e-05	3.56735e-05	1.04634e-05
P21126	Ccdc127	Coiled-coil domain-containing protein 127	CC127_MOUSE	-inf	1.05399e-05	3.5699e-05	3.44667e-05
Q5SU73	Sox10	Transcription factor SOX-10	SOX10_MOUSE	-inf	1.0552e-05	3.57189e-05	4.08425e-06
P97291	Tenm4	Teneurin-4	TEN4_MOUSE	-inf	1.05587e-05	3.57202e-05	9.37939e-06
P38585	Suox	Sulfite oxidase, mitochondrial	SUOX_MOUSE	-inf	1.06292e-05	3.5933e-05	1.30073e-05
Q3TIU4	Rwdd2a	RWD domain-containing protein 2A	RWD2A_MOUSE	-inf	1.06342e-05	3.5933e-05	1.28995e-05
Q9QVP9	Ttc7b	Tetratricopeptide repeat protein 7B	TTC7B_MOUSE	-inf	1.06589e-05	3.59922e-05	5.37473e-05
Q61656	Anpep	Aminopeptidase N	AMPN_MOUSE	-inf	1.06643e-05	3.59922e-05	0.000124995
P25976	Mrpl37	39S ribosomal protein L37, mitochondrial	RM37_MOUSE	-inf	1.06847e-05	3.60357e-05	7.49164e-06
Q9D0I4	Mmgt1	Membrane magnesium transporter 1	MMGT1_MOUSE	-inf	1.06942e-05	3.60357e-05	7.27631e-06
Q6ZQH8	Tatdn1	Putative deoxyribonuclease TATDN1	TATD1_MOUSE	-inf	1.06962e-05	3.60357e-05	1.76247e-06
Q61097	Srp54	Signal recognition particle 54 kDa protein	SRP54_MOUSE	-inf	1.07276e-05	3.61199e-05	9.76759e-06
Q8JZV7	Pdxdc1	Pyridoxal-dependent decarboxylase domain-containing protein 1	PDXD1_MOUSE	-inf	1.08634e-05	3.65556e-05	8.59141e-06
Q9WVF8	Pcmtd1	Protein-L-isoaspartate O-methyltransferase domain-containing protein 1	PCMD1_MOUSE	-inf	1.08725e-05	3.65646e-05	3.34874e-05
Q62384	Cog3	Conserved oligomeric Golgi complex subunit 3	COG3_MOUSE	-inf	1.08817e-05	3.6574e-05	4.13373e-06
Q5M956	Rnf20	E3 ubiquitin-protein ligase BRE1A	BRE1A_MOUSE	-inf	1.09164e-05	3.66689e-05	9.14339e-06
Q925E7	Mrpl54	39S ribosomal protein L54, mitochondrial	RM54_MOUSE	-inf	1.09547e-05	3.67759e-05	1.41165e-05
Q9DCU6	Mrpl52	39S ribosomal protein L52, mitochondrial	RM52_MOUSE	-inf	1.10226e-05	3.69607e-05	1.22124e-05
P48193	Ring1;Rnf2	E3 ubiquitin-protein ligase RING1;E3 ubiquitin-protein ligase RING2	RING1_MOUSE;RING2_MOUSE	-inf	1.10227e-05	3.69607e-05	1.49055e-05
Q8VCY8	Emc6	ER membrane protein complex subunit 6	EMC6_MOUSE	-inf	1.10348e-05	3.69794e-05	1.15829e-05
Q99MR0	Ankib1	Ankyrin repeat and IBR domain-containing protein 1	AKIB1_MOUSE	-inf	1.10548e-05	3.70248e-05	1.77528e-05
P58854	Zfand1	AN1-type zinc finger protein 1	ZFAN1_MOUSE	-inf	1.10632e-05	3.70311e-05	4.86195e-06
Q02956	Fam120b	Constitutive coactivator of peroxisome proliferator-activated receptor gamma	F120B_MOUSE	-inf	1.10954e-05	3.70747e-05	4.14089e-06
Q61334	Dync2h1	Cytoplasmic dynein 2 heavy chain 1	DYHC2_MOUSE	-inf	1.10956e-05	3.70747e-05	1.47535e-05
Q99NF2	Tacc1	Transforming acidic coiled-coil-containing protein 1	TACC1_MOUSE	-inf	1.10957e-05	3.70747e-05	1.60282e-05
Q59J78	Mrps23	28S ribosomal protein S23, mitochondrial	RT23_MOUSE	-inf	1.11247e-05	3.71406e-05	6.05061e-05
Q9CPV3	Septin5	Septin-5	SEPT5_MOUSE	-inf	1.11285e-05	3.71406e-05	4.51866e-06
Q61559	Mbnl1	Muscleblind-like protein 1	MBNL1_MOUSE	-inf	1.1152e-05	3.71754e-05	4.60315e-06
Q9DAT5	Itpka	Inositol-trisphosphate 3-kinase A	IP3KA_MOUSE	-inf	1.1158e-05	3.71754e-05	4.18653e-06
P09470	Necap2	Adaptin ear-binding coat-associated protein 2	NECP2_MOUSE	-inf	1.11585e-05	3.71754e-05	1.55942e-05
Q9R1S8	Tns3	Tensin-3	TENS3_MOUSE	-inf	1.11692e-05	3.71894e-05	3.28012e-06
Q3V0K9	Hypk	Huntingtin-interacting protein K	HYPK_MOUSE	-inf	1.12083e-05	3.72976e-05	1.51348e-05
Q7M759	Fam168a	Protein FAM168A	F168A_MOUSE	-inf	1.12189e-05	3.73113e-05	1.01795e-05
Q9DAI2	Cd55	Complement decay-accelerating factor, GPI-anchored	DAF1_MOUSE	-inf	1.12432e-05	3.73701e-05	1.38114e-05
Q9R0N8	Drap1	Dr1-associated corepressor	NC2A_MOUSE	-inf	1.13013e-05	3.75415e-05	1.37061e-05
P41539	Syngr1	Synaptogyrin-1	SNG1_MOUSE	-inf	1.13081e-05	3.75422e-05	2.72783e-05
Q5NCE8	Txnrd2	Thioredoxin reductase 2, mitochondrial	TRXR2_MOUSE	-inf	1.13199e-05	3.75595e-05	7.58453e-06
Q9CQ88	Glrb	Glycine receptor subunit beta	GLRB_MOUSE	-inf	1.13557e-05	3.76561e-05	3.57239e-06
C0HKD8	Kiaa1841	Uncharacterized protein KIAA1841	K1841_MOUSE	-inf	1.13752e-05	3.7699e-05	4.92084e-06
Q9CXJ1	Coq3	Ubiquinone biosynthesis O-methyltransferase, mitochondrial	COQ3_MOUSE	-inf	1.13902e-05	3.77266e-05	6.20438e-06
P61486	Slco3a1	Solute carrier organic anion transporter family member 3A1	SO3A1_MOUSE	-inf	1.15079e-05	3.80944e-05	5.50964e-05
Q9D7S9	Rdh11	Retinol dehydrogenase 11	RDH11_MOUSE	-inf	1.15848e-05	3.83126e-05	3.5602e-05
Q9DCM2	Ppif	Peptidyl-prolyl cis-trans isomerase F, mitochondrial	PPIF_MOUSE	-inf	1.15873e-05	3.83126e-05	4.04052e-05
Q9DBL1	Gpcpd1	Glycerophosphocholine phosphodiesterase GPCPD1	GPCP1_MOUSE	-inf	1.16328e-05	3.84407e-05	4.17436e-05
Q8K2C7	Col2a1;COL2A1	Collagen alpha-1(II) chain	CO2A1_MOUSE;CO2A1_HUMAN	-inf	1.16698e-05	3.85409e-05	3.3307e-06
Q9WVQ5	Ubr1	E3 ubiquitin-protein ligase UBR1	UBR1_MOUSE	-inf	1.16949e-05	3.86012e-05	6.46469e-06
Q99JT2	Lrrc8c	Volume-regulated anion channel subunit LRRC8C	LRC8C_MOUSE	-inf	1.17559e-05	3.87803e-05	1.44391e-05
Q99K01	Plaat3	Phospholipase A and acyltransferase 3	PLAT3_MOUSE	-inf	1.17628e-05	3.87804e-05	1.44256e-05
Q9QX11	Ctnnbl1	Beta-catenin-like protein 1	CTBL1_MOUSE	-inf	1.18252e-05	3.89637e-05	6.80522e-06
P16254	Adgrl2	Adhesion G protein-coupled receptor L2	AGRL2_MOUSE	-inf	1.1887e-05	3.91424e-05	9.02863e-06
Q61686	Ccdc91	Coiled-coil domain-containing protein 91	CCD91_MOUSE	-inf	1.18932e-05	3.91424e-05	2.52932e-05
Q9WUT3	Dusp28	Dual specificity phosphatase 28	DUS28_MOUSE	-inf	1.19183e-05	3.92023e-05	3.21733e-05
Q99JF8	Plcl2	Inactive phospholipase C-like protein 2	PLCL2_MOUSE	-inf	1.19262e-05	3.92058e-05	8.0436e-05
P62073	Ufd1	Ubiquitin recognition factor in ER-associated degradation protein 1	UFD1_MOUSE	-inf	1.19452e-05	3.92457e-05	0.000128059
Q8BTY8	Bbs1	Bardet-Biedl syndrome 1 protein homolog	BBS1_MOUSE	-inf	1.19579e-05	3.92647e-05	2.51501e-06
Q9CR39	Smyd2	N-lysine methyltransferase SMYD2	SMYD2_MOUSE	-inf	1.19782e-05	3.93086e-05	9.03752e-06
O09044	Aldh3a2	Aldehyde dehydrogenase family 3 member A2	AL3A2_MOUSE	-inf	1.20065e-05	3.93672e-05	7.54677e-06
Q8BHJ5	Api5	Apoptosis inhibitor 5	API5_MOUSE	-inf	1.20099e-05	3.93672e-05	5.49161e-06
Q8C0L6	Snx15	Sorting nexin-15	SNX15_MOUSE	-inf	1.2029e-05	3.94073e-05	5.83702e-06
Q61239	Plcb3	1-phosphatidylinositol 4,5-bisphosphate phosphodiesterase beta-3	PLCB3_MOUSE	-inf	1.20537e-05	3.94656e-05	1.36645e-05
Q3UR70	Smchd1	Structural maintenance of chromosomes flexible hinge domain-containing protein 1	SMHD1_MOUSE	-inf	1.20698e-05	3.94786e-05	3.54009e-06
Q9D0L8	Chn2	Beta-chimaerin	CHIO_MOUSE	-inf	1.20716e-05	3.94786e-05	7.74635e-05
Q8BZJ7	Timm10	Mitochondrial import inner membrane translocase subunit Tim10	TIM10_MOUSE	-inf	1.21533e-05	3.97232e-05	1.71291e-05
Q8VEE4	Znf512	Zinc finger protein 512	ZN512_MOUSE	-inf	1.21647e-05	3.97343e-05	3.92212e-06
Q9D2R0	Arhgef6	Rho guanine nucleotide exchange factor 6	ARHG6_MOUSE	-inf	1.21707e-05	3.97343e-05	7.00922e-06
Q80TA9	Cpt2	Carnitine O-palmitoyltransferase 2, mitochondrial	CPT2_MOUSE	-inf	1.22007e-05	3.98094e-05	2.59117e-06
O88974	Esam	Endothelial cell-selective adhesion molecule	ESAM_MOUSE	-inf	1.22162e-05	3.98371e-05	2.2052e-05
P62965	Rraga	Ras-related GTP-binding protein A	RRAGA_MOUSE	-inf	1.22589e-05	3.99538e-05	1.02226e-05
Q3URE9	Selenot,Selenot;SELENOT	Thioredoxin reductase-like selenoprotein T	SELT_MOUSE;SELT_HUMAN	-inf	1.22752e-05	3.99839e-05	5.44844e-06
Q8BKX6	Rpgr	X-linked retinitis pigmentosa GTPase regulator	RPGR_MOUSE	-inf	1.23335e-05	4.01508e-05	2.33654e-06
Q8C5H8	Csnk1e	Casein kinase I isoform epsilon	KC1E_MOUSE	-inf	1.24101e-05	4.0377e-05	4.50804e-05
Q3TYS2	Mlycd	Malonyl-CoA decarboxylase, mitochondrial	DCMC_MOUSE	-inf	1.24501e-05	4.04531e-05	7.16509e-06
Q8BJU9	Serpinb1b	Leukocyte elastase inhibitor B	ILEUB_MOUSE	-inf	1.24506e-05	4.04531e-05	9.28939e-07
P56388	Pdyn	Proenkephalin-B	PDYN_MOUSE	-inf	1.24547e-05	4.04531e-05	1.34019e-05
Q8VCE6	Chmp2b	Charged multivesicular body protein 2b	CHM2B_MOUSE	-inf	1.24809e-05	4.05148e-05	1.28688e-05
Q8BG67	Chn1	N-chimaerin	CHIN_MOUSE	-inf	1.25287e-05	4.06471e-05	5.08818e-06
Q8R238	Commd4	COMM domain-containing protein 4	COMD4_MOUSE	-inf	1.25826e-05	4.07986e-05	3.4225e-06
Q8BGZ4	Mrpl13	39S ribosomal protein L13, mitochondrial	RM13_MOUSE	-inf	1.2651e-05	4.09896e-05	6.14429e-05
Q9CYG7	Gstt3	Glutathione S-transferase theta-3	GSTT3_MOUSE	-inf	1.26561e-05	4.09896e-05	3.43359e-05
Q8K3K8	Actl6a	Actin-like protein 6A	ACL6A_MOUSE	-inf	1.26631e-05	4.09896e-05	1.10091e-06
Q8VBW6	Klhl36	Kelch-like protein 36	KLH36_MOUSE	-inf	1.2745e-05	4.12312e-05	4.55627e-05
Q9D868	Slc25a25	Calcium-binding mitochondrial carrier protein SCaMC-2	SCMC2_MOUSE	-inf	1.2781e-05	4.13242e-05	2.0123e-05
P55144	Thnsl2	Threonine synthase-like 2	THNS2_MOUSE	-inf	1.27971e-05	4.13528e-05	7.57538e-06
P61807	Rmnd5a	E3 ubiquitin-protein ligase RMND5A	RMD5A_MOUSE	-inf	1.28325e-05	4.14438e-05	9.46714e-06
Q9D0V7	Ecsit	Evolutionarily conserved signaling intermediate in Toll pathway, mitochondrial	ECSIT_MOUSE	-inf	1.28563e-05	4.14949e-05	3.24594e-06
Q80YX1	Pold1	DNA polymerase delta catalytic subunit	DPOD1_MOUSE	-inf	1.28629e-05	4.14949e-05	1.33928e-05
P62830	Csnk2a2	Casein kinase II subunit alpha'	CSK22_MOUSE	-2.91832	1.28868e-05	4.15486e-05	9.89859e-05
Q68FL6	Clstn3	Calsyntenin-3	CSTN3_MOUSE	-inf	1.29271e-05	4.16547e-05	5.40587e-05
Q9QZB9	Cmtr1	Cap-specific mRNA (nucleoside-2'-O-)-methyltransferase 1	CMTR1_MOUSE	-inf	1.29837e-05	4.18136e-05	3.63671e-05
A2AMZ4	Psph	Phosphoserine phosphatase	SERB_MOUSE	-inf	1.30085e-05	4.18697e-05	9.33392e-06
O08644	Eif5b	Eukaryotic translation initiation factor 5B	IF2P_MOUSE	-inf	1.30263e-05	4.18814e-05	4.42331e-06
Q9D2V7	Ndc1	Nucleoporin NDC1	NDC1_MOUSE	-inf	1.30268e-05	4.18814e-05	4.40736e-05
Q8BIF2	Rundc3b	RUN domain-containing protein 3B	RUN3B_MOUSE	-inf	1.30506e-05	4.19341e-05	3.74902e-06
Q9QXL8	Necab2	N-terminal EF-hand calcium-binding protein 2	NECA2_MOUSE	-inf	1.30937e-05	4.20235e-05	5.90679e-06
Q99KK2	Fmnl1	Formin-like protein 1	FMNL1_MOUSE	-inf	1.30966e-05	4.20235e-05	5.27557e-05
Q0GNC1	Ccdc88a	Girdin	GRDN_MOUSE	-inf	1.31005e-05	4.20235e-05	6.70913e-05
Q04692	Adam11	Disintegrin and metalloproteinase domain-containing protein 11	ADA11_MOUSE	-inf	1.31436e-05	4.21378e-05	1.55691e-05
Q9JK53	Elavl2	ELAV-like protein 2	ELAV2_MOUSE	-inf	1.31813e-05	4.2235e-05	9.743e-06
Q8K1S2	Pfkl	ATP-dependent 6-phosphofructokinase, liver type	PFKAL_MOUSE	-inf	1.32147e-05	4.22831e-05	1.83487e-06
O08992	Adhfe1	Hydroxyacid-oxoacid transhydrogenase, mitochondrial	HOT_MOUSE	-inf	1.32153e-05	4.22831e-05	2.91921e-05
Q8CC86	Gpc1	Glypican-1	GPC1_MOUSE	-inf	1.32186e-05	4.22831e-05	4.65111e-06
Q60805	Mcrip1	Mapk-regulated corepressor-interacting protein 1	MCRI1_MOUSE	-inf	1.32264e-05	4.22845e-05	3.79095e-06
Q9DC50	Pdcl3	Phosducin-like protein 3	PDCL3_MOUSE	-inf	1.3247e-05	4.23223e-05	4.2373e-06
Q9JI19	Ppm1g	Protein phosphatase 1G	PPM1G_MOUSE	-inf	1.32531e-05	4.23223e-05	9.77757e-06
Q62203	Gpr37	Prosaposin receptor GPR37	GPR37_MOUSE	-inf	1.32719e-05	4.23584e-05	8.55611e-06
P29387	Fhl2	Four and a half LIM domains protein 2	FHL2_MOUSE	-inf	1.33293e-05	4.25181e-05	0.000144756
Q9WU60	Ip6k1	Inositol hexakisphosphate kinase 1	IP6K1_MOUSE	-inf	1.33524e-05	4.25677e-05	7.32941e-06
Q8VI63	Wdr1	WD repeat-containing protein 1	WDR1_MOUSE	-inf	1.3401e-05	4.26989e-05	1.46387e-05
O35927	Dctn1	Dynactin subunit 1	DCTN1_MOUSE	1.53033	1.3457e-05	4.28532e-05	0.000182064
Q99MJ9	Gdpd5	Glycerophosphodiester phosphodiesterase domain-containing protein 5	GDPD5_MOUSE	-inf	1.35191e-05	4.30269e-05	3.34561e-06
Q9D1P0	Bcl2l1	Bcl-2-like protein 1	B2CL1_MOUSE	-inf	1.35309e-05	4.30405e-05	0.000127793
P70122	Smc3	Structural maintenance of chromosomes protein 3	SMC3_MOUSE	-inf	1.35576e-05	4.31012e-05	1.7209e-05
Q8BXC6	Ubr2	E3 ubiquitin-protein ligase UBR2	UBR2_MOUSE	-inf	1.36299e-05	4.33071e-05	1.87143e-05
Q9R1J0	Rbm26	RNA-binding protein 26	RBM26_MOUSE	-inf	1.36557e-05	4.3365e-05	2.65147e-06
Q7TSQ8	Znf326	DBIRD complex subunit ZNF326	ZN326_MOUSE	-inf	1.36715e-05	4.33909e-05	2.8855e-05
Q811U4	Cyp2d11	Cytochrome P450 2D11	CP2DB_MOUSE	-inf	1.37313e-05	4.35562e-05	1.85091e-06
P49817	Rpl38	60S ribosomal protein L38	RL38_MOUSE	-inf	1.37584e-05	4.3618e-05	1.9578e-05
Q05CL8	Dglucy	D-glutamate cyclase, mitochondrial	GLUCM_MOUSE	-inf	1.37888e-05	4.36899e-05	4.87542e-06
O35071	Kif3c	Kinesin-like protein KIF3C	KIF3C_MOUSE	-inf	1.38153e-05	4.37322e-05	1.12827e-05
Q8VCI5	Cd34	Hematopoietic progenitor cell antigen CD34	CD34_MOUSE	-inf	1.38175e-05	4.37322e-05	9.89066e-06
Q9D662	Lims1	LIM and senescent cell antigen-like-containing domain protein 1	LIMS1_MOUSE	-inf	1.38653e-05	4.38413e-05	2.29092e-06
Q922J3	Noct	Nocturnin	NOCT_MOUSE	-inf	1.38673e-05	4.38413e-05	2.8765e-05
Q9JHS3	Carmil1	F-actin-uncapping protein LRRC16A	CARL1_MOUSE	-inf	1.3926e-05	4.39949e-05	1.0727e-05
Q9CQ00	Stk25	Serine/threonine-protein kinase 25	STK25_MOUSE	-inf	1.39318e-05	4.39949e-05	8.89659e-06
Q4VC33	Magoh	Protein mago nashi homolog	MGN_MOUSE	-inf	1.3939e-05	4.39949e-05	3.74249e-06
Q8BJ42	Mipep	Mitochondrial intermediate peptidase	MIPEP_MOUSE	-inf	1.39848e-05	4.40939e-05	3.96195e-05
Q6PCZ4	Jak1	Tyrosine-protein kinase JAK1	JAK1_MOUSE	-inf	1.39859e-05	4.40939e-05	2.52263e-06
Q8R502	Mturn	Maturin	MTURN_MOUSE	-inf	1.40387e-05	4.42259e-05	8.38712e-06
P97326	Ppp4c	Serine/threonine-protein phosphatase 4 catalytic subunit	PP4C_MOUSE	-inf	1.40467e-05	4.42259e-05	2.98337e-06
Q9CW03	Trappc11	Trafficking protein particle complex subunit 11	TPC11_MOUSE	-inf	1.40545e-05	4.42259e-05	8.03641e-06
Q8CG76	Faim	Fas apoptotic inhibitory molecule 1	FAIM1_MOUSE	-inf	1.40588e-05	4.42259e-05	5.4364e-05
Q9ERU9	Scrn2	Secernin-2	SCRN2_MOUSE	-inf	1.40917e-05	4.43048e-05	7.12912e-06
P53395	Kiaa1671	Uncharacterized protein KIAA1671	K1671_MOUSE	-1.77937	1.41043e-05	4.43086e-05	5.54165e-05
Q8R4I7	Cd151	CD151 antigen	CD151_MOUSE	-inf	1.41222e-05	4.43086e-05	5.88507e-06
Q80Y98	Mzt1	Mitotic-spindle organizing protein 1	MZT1_MOUSE	-inf	1.41236e-05	4.43086e-05	0.000640928
Q8K157	Arhgef18	Rho guanine nucleotide exchange factor 18	ARHGI_MOUSE	-inf	1.4124e-05	4.43086e-05	1.73569e-06
P97470	Yme1l1	ATP-dependent zinc metalloprotease YME1L1	YMEL1_MOUSE	-inf	1.41322e-05	4.43099e-05	1.24076e-05
Q8N7N5	Arhgef10	Rho guanine nucleotide exchange factor 10	ARHGA_MOUSE	-inf	1.41833e-05	4.44456e-05	4.77746e-06
Q9R078	Nek7	Serine/threonine-protein kinase Nek7	NEK7_MOUSE	-inf	1.42701e-05	4.4693e-05	1.91552e-06
Q9JMG3	Washc3	WASH complex subunit 3	WASC3_MOUSE	-inf	1.4283e-05	4.47091e-05	8.31037e-06
O88986	Lrrfip1	Leucine-rich repeat flightless-interacting protein 1	LRRF1_MOUSE	-inf	1.43572e-05	4.49164e-05	9.96306e-06
P17095	Nars2	Probable asparagine--tRNA ligase, mitochondrial	SYNM_MOUSE	-4.32769	1.43806e-05	4.4965e-05	4.06395e-05
Q3UHH1	Brinp1	BMP/retinoic acid-inducible neural-specific protein 1	BRNP1_MOUSE	-inf	1.44094e-05	4.50088e-05	2.86281e-06
Q60872	Pabpn1	Polyadenylate-binding protein 2	PABP2_MOUSE	-inf	1.44114e-05	4.50088e-05	3.04288e-05
Q9D0B0	Spast	Spastin	SPAST_MOUSE	-inf	1.44183e-05	4.50088e-05	2.21708e-06
Q8R404	Hmbs	Porphobilinogen deaminase	HEM3_MOUSE	-inf	1.44778e-05	4.51698e-05	6.34156e-05
Q3UHD1	Lrfn4	Leucine-rich repeat and fibronectin type-III domain-containing protein 4	LRFN4_MOUSE	-inf	1.4623e-05	4.55815e-05	1.90811e-05
P57080	Me2	NAD-dependent malic enzyme, mitochondrial	MAOM_MOUSE	-inf	1.46258e-05	4.55815e-05	1.47912e-06
Q9CQT7	Copg1	Coatomer subunit gamma-1	COPG1_MOUSE	-inf	1.46596e-05	4.56619e-05	5.08172e-05
Q9CQW0	Cobll1	Cordon-bleu protein-like 1	COBL1_MOUSE	-inf	1.46742e-05	4.56824e-05	8.66567e-06
Q9D1I6	Dock1	Dedicator of cytokinesis protein 1	DOCK1_MOUSE	-inf	1.46921e-05	4.56971e-05	3.9121e-06
Q8K0D5	Nudt18	8-oxo-dGDP phosphatase NUDT18	NUD18_MOUSE	-inf	1.46949e-05	4.56971e-05	2.83526e-05
Q62313	Serpini1	Neuroserpin	NEUS_MOUSE	-inf	1.47437e-05	4.58236e-05	5.7108e-06
Q9Z123	Hars2	Probable histidine--tRNA ligase, mitochondrial	SYHM_MOUSE	-inf	1.4773e-05	4.58896e-05	3.18345e-06
Q811P8	Smim1	Small integral membrane protein 1	SMIM1_MOUSE	-inf	1.48062e-05	4.59679e-05	3.38791e-05
Q9DCG9	Dennd1a	DENN domain-containing protein 1A	DEN1A_MOUSE	-inf	1.48385e-05	4.60431e-05	2.14885e-05
Q3UDW8	Naa38	N-alpha-acetyltransferase 38, NatC auxiliary subunit	LSMD1_MOUSE	-inf	1.48907e-05	4.61797e-05	3.15299e-06
Q6P5D8	Nup188	Nucleoporin NUP188 homolog	NU188_MOUSE	-inf	1.49064e-05	4.62032e-05	4.89636e-06
Q9CQY1	Exosc2	Exosome complex component RRP4	EXOS2_MOUSE	-inf	1.49973e-05	4.6454e-05	6.12873e-06
Q8R4S0	Clcn2	Chloride channel protein 2	CLCN2_MOUSE	-inf	1.50036e-05	4.6454e-05	3.59108e-06
Q8R550	Pgm3	Phosphoacetylglucosamine mutase	AGM1_MOUSE	-inf	1.50118e-05	4.64542e-05	2.95359e-05
Q9R0X5	Jakmip1	Janus kinase and microtubule-interacting protein 1	JKIP1_MOUSE	-inf	1.50258e-05	4.64724e-05	9.18427e-06
Q9CQA9	Vcam1	Vascular cell adhesion protein 1	VCAM1_MOUSE	-inf	1.51308e-05	4.67582e-05	3.90091e-06
P55194	Mrtfb	Myocardin-related transcription factor B	MRTFB_MOUSE	-inf	1.51347e-05	4.67582e-05	1.93219e-06
Q9JIM1	Zpr1	Zinc finger protein ZPR1	ZPR1_MOUSE	-inf	1.52319e-05	4.70331e-05	1.24822e-05
O35488	Cnpy4	Protein canopy homolog 4	CNPY4_MOUSE	-inf	1.52841e-05	4.71686e-05	5.38466e-06
O70310	Hmgn1	Non-histone chromosomal protein HMG-14	HMGN1_MOUSE	-inf	1.53231e-05	4.72635e-05	2.895e-05
Q8BTV2	Chgb	Secretogranin-1	SCG1_MOUSE	-inf	1.53482e-05	4.73154e-05	1.83515e-05
Q9QZQ8	Chd4	Chromodomain-helicase-DNA-binding protein 4	CHD4_MOUSE	-inf	1.54476e-05	4.75961e-05	0.000248604
Q3U487	Usp39	U4/U6.U5 tri-snRNP-associated protein 2	SNUT2_MOUSE	-inf	1.54565e-05	4.75976e-05	1.10941e-05
P56382	Chp1	Calcineurin B homologous protein 1	CHP1_MOUSE	-inf	1.55103e-05	4.77374e-05	0.000213758
P17751	Slc6a5	Sodium- and chloride-dependent glycine transporter 2	SC6A5_MOUSE	-0.93161	1.55361e-05	4.77911e-05	0.00229009
Q8CH25	Gatm	Glycine amidinotransferase, mitochondrial	GATM_MOUSE	-inf	1.55829e-05	4.79091e-05	7.15719e-06
Q8CII2	Snrnp40	U5 small nuclear ribonucleoprotein 40 kDa protein	SNR40_MOUSE	-inf	1.56038e-05	4.79476e-05	1.06239e-06
Q8BGR2	Gpc4	Glypican-4	GPC4_MOUSE	-inf	1.56421e-05	4.80394e-05	4.60401e-06
P52800	Ankrd63	Ankyrin repeat domain-containing protein 63	ANR63_MOUSE	-inf	1.57169e-05	4.82431e-05	8.58569e-06
Q9DC28	Rnps1	RNA-binding protein with serine-rich domain 1	RNPS1_MOUSE	-inf	1.57682e-05	4.83494e-05	1.39887e-05
Q9JI59	Tac1	Protachykinin-1	TKN1_MOUSE	-inf	1.57685e-05	4.83494e-05	5.94978e-06
Q64152	Prex1	Phosphatidylinositol 3,4,5-trisphosphate-dependent Rac exchanger 1 protein	PREX1_MOUSE	-inf	1.58374e-05	4.85346e-05	1.00454e-05
Q9EP97	Senp3	Sentrin-specific protease 3	SENP3_MOUSE	-inf	1.58592e-05	4.85623e-05	3.92889e-06
Q80TT8	Rtn4r	Reticulon-4 receptor	RTN4R_MOUSE	-inf	1.58635e-05	4.85623e-05	1.79649e-06
Q3URS9	Dbn1	Drebrin	DREB_MOUSE	-inf	1.59687e-05	4.88579e-05	1.28668e-05
P62843	Pcsk2	Neuroendocrine convertase 2	NEC2_MOUSE	-inf	1.60237e-05	4.90001e-05	5.14392e-05
Q9CQ56	Ngly1	Peptide-N(4)-(N-acetyl-beta-glucosaminyl)asparagine amidase	NGLY1_MOUSE	-inf	1.60781e-05	4.91399e-05	5.59887e-06
A9Z1V5	Dnlz	DNL-type zinc finger protein	DNLZ_MOUSE	-inf	1.61594e-05	4.9362e-05	2.21421e-06
Q8R2H9	Pdk3	[Pyruvate dehydrogenase (acetyl-transferring)] kinase isozyme 3, mitochondrial	PDK3_MOUSE	-inf	1.61975e-05	4.94511e-05	2.63432e-06
Q9JLB2	Mrpl38	39S ribosomal protein L38, mitochondrial	RM38_MOUSE	-inf	1.62059e-05	4.94511e-05	1.17858e-05
Q9CR86	Ano6	Anoctamin-6	ANO6_MOUSE	-inf	1.6233e-05	4.95072e-05	7.27546e-05
Q8R4V2	Cmas	N-acylneuraminate cytidylyltransferase	NEUA_MOUSE	-inf	1.62899e-05	4.96281e-05	1.11562e-05
Q9CRB2	Gap43	Neuromodulin	NEUM_MOUSE	-inf	1.62901e-05	4.96281e-05	1.0367e-05
O70311	Acad11	Acyl-CoA dehydrogenase family member 11	ACD11_MOUSE	-inf	1.62999e-05	4.96313e-05	1.59078e-05
Q62179	Rnf31	E3 ubiquitin-protein ligase RNF31	RNF31_MOUSE	-inf	1.63095e-05	4.96341e-05	5.03931e-06
O08688	Syt1	Synaptotagmin-1	SYT1_MOUSE	-inf	1.63345e-05	4.96839e-05	1.48087e-05
Q8QZY2	Mtpn	Myotrophin	MTPN_MOUSE	-inf	1.63851e-05	4.98111e-05	2.78502e-06
P58069	Tceal3	Transcription elongation factor A protein-like 3	TCAL3_MOUSE	-inf	1.64012e-05	4.98335e-05	7.60185e-06
Q9DCB4	Cavin2	Caveolae-associated protein 2	CAVN2_MOUSE	-inf	1.64776e-05	5.00251e-05	0.000134281
Q8BW41	Dao	D-amino-acid oxidase	OXDA_MOUSE	0.911164	1.64818e-05	5.00251e-05	3.74191e-05
P61965	Gpsm1	G-protein-signaling modulator 1	GPSM1_MOUSE	-inf	1.65555e-05	5.02219e-05	8.24533e-06
Q8R4E6	Cbx5	Chromobox protein homolog 5	CBX5_MOUSE	-inf	1.66311e-05	5.04245e-05	7.94895e-06
P15379	Os9	Protein OS-9	OS9_MOUSE	-inf	1.66775e-05	5.05382e-05	8.28665e-06
Q8BG94	Gorasp1	Golgi reassembly-stacking protein 1	GORS1_MOUSE	-inf	1.67003e-05	5.0554e-05	8.83172e-06
Q9D387	Slc8a3	Sodium/calcium exchanger 3	NAC3_MOUSE	-inf	1.67005e-05	5.0554e-05	4.51313e-05
P18826	Aup1	Ancient ubiquitous protein 1	AUP1_MOUSE	-inf	1.6716e-05	5.05743e-05	5.78404e-06
Q9CWR2	Smim13	Small integral membrane protein 13	SIM13_MOUSE	-inf	1.67938e-05	5.07824e-05	6.80585e-06
Q99MB7	Gpr162	Probable G-protein coupled receptor 162	GP162_MOUSE	-inf	1.68522e-05	5.09205e-05	1.59861e-05
A2AAE1	Ap1s2	AP-1 complex subunit sigma-2	AP1S2_MOUSE	-inf	1.68573e-05	5.09205e-05	2.69154e-06
Q921E2	Rpe	Ribulose-phosphate 3-epimerase	RPE_MOUSE	-inf	1.68697e-05	5.0931e-05	2.13236e-05
Q8K3M5	Dlg3	Disks large homolog 3	DLG3_MOUSE	-inf	1.69352e-05	5.11017e-05	1.52873e-06
Q5DTN8	Rgs9	Regulator of G-protein signaling 9	RGS9_MOUSE	-inf	1.70822e-05	5.1518e-05	4.54941e-06
P62918	Dpy19l1	Probable C-mannosyltransferase DPY19L1	D19L1_MOUSE	-2.20724	1.71431e-05	5.16741e-05	0.00012795
P35505	Osgep	Probable tRNA N6-adenosine threonylcarbamoyltransferase	OSGEP_MOUSE	-inf	1.72214e-05	5.18829e-05	5.09346e-05
Q8VE42	Phospho2	Pyridoxal phosphate phosphatase PHOSPHO2	PHOP2_MOUSE	-inf	1.72651e-05	5.19869e-05	1.74067e-06
Q99MR6	Srrt	Serrate RNA effector molecule homolog	SRRT_MOUSE	-inf	1.72966e-05	5.20544e-05	2.50435e-05
Q3UJB9	Eif3d	Eukaryotic translation initiation factor 3 subunit D	EIF3D_MOUSE	-inf	1.7329e-05	5.21243e-05	1.59058e-05
Q8BLK9	Fndc3a	Fibronectin type-III domain-containing protein 3A	FND3A_MOUSE	-inf	1.73695e-05	5.22183e-05	2.9437e-06
Q61072	Hscb	Iron-sulfur cluster co-chaperone protein HscB	HSC20_MOUSE	-inf	1.73946e-05	5.22662e-05	4.33689e-06
Q9CQ02	Syn3	Synapsin-3	SYN3_MOUSE	-inf	1.74739e-05	5.24769e-05	3.13371e-06
Q8CGM1	Cert	Ceramide transfer protein	CERT_MOUSE	-inf	1.74956e-05	5.25143e-05	1.20303e-05
Q99N92	Srpra	Signal recognition particle receptor subunit alpha	SRPRA_MOUSE	-inf	1.767e-05	5.301e-05	7.5851e-06
Q6PEE3	Vps8	Vacuolar protein sorting-associated protein 8 homolog	VPS8_MOUSE	-inf	1.76916e-05	5.3047e-05	5.85744e-06
Q3U3E2	Dnajc12	DnaJ homolog subfamily C member 12	DJC12_MOUSE	-inf	1.77738e-05	5.32652e-05	1.81555e-06
Q8JZQ9	Ptprg	Receptor-type tyrosine-protein phosphatase gamma	PTPRG_MOUSE	-inf	1.78082e-05	5.33403e-05	2.8838e-05
Q7TSI3	Actbl2	Beta-actin-like protein 2	ACTBL_MOUSE	-inf	1.78502e-05	5.34382e-05	1.55886e-05
Q9JJY3	Washc4	WASH complex subunit 4	WASC4_MOUSE	-1.91798	1.78654e-05	5.34553e-05	0.000104384
Q9QXA5	Kyat3	Kynurenine--oxoglutarate transaminase 3	KAT3_MOUSE	-inf	1.79004e-05	5.35321e-05	2.59889e-05
Q505D1	Dnajc5	DnaJ homolog subfamily C member 5	DNJC5_MOUSE	-inf	1.7952e-05	5.36582e-05	7.76686e-06
Q9Z2E9	Faah	Fatty-acid amide hydrolase 1	FAAH1_MOUSE	-inf	1.79643e-05	5.36647e-05	7.90575e-06
P02463	Rnf34	E3 ubiquitin-protein ligase RNF34	RNF34_MOUSE	-inf	1.7973e-05	5.36647e-05	1.84503e-05
Q80TL7	Dmac1	Distal membrane-arm assembly complex protein 1	DMAC1_MOUSE	-inf	1.80036e-05	5.37022e-05	3.87496e-05
Q6SKR2	Fcgrt	IgG receptor FcRn large subunit p51	FCGRN_MOUSE	-inf	1.80044e-05	5.37022e-05	6.39392e-06
Q8K1S4	Dapk3	Death-associated protein kinase 3	DAPK3_MOUSE	-inf	1.80629e-05	5.38483e-05	3.22233e-06
P70295	Mcfd2	Multiple coagulation factor deficiency protein 2 homolog	MCFD2_MOUSE	-inf	1.81727e-05	5.41475e-05	4.64793e-06
Q91YN0	Lrrc40	Leucine-rich repeat-containing protein 40	LRC40_MOUSE	-inf	1.8199e-05	5.41973e-05	2.07887e-06
Q91VU0	Podxl2	Podocalyxin-like protein 2	PDXL2_MOUSE	-inf	1.82645e-05	5.4364e-05	1.05214e-05
Q8K4B0	Fxr2	Fragile X mental retardation syndrome-related protein 2	FXR2_MOUSE	-inf	1.82918e-05	5.44168e-05	4.38053e-06
Q3TKT4	Osbpl6	Oxysterol-binding protein-related protein 6	OSBL6_MOUSE	-inf	1.83239e-05	5.4484e-05	6.77011e-06
P70310	Pcdhb14	Protocadherin beta-14	PCDBE_MOUSE	-inf	1.84105e-05	5.47129e-05	3.97392e-06
Q8VBT9	Nadk2	NAD kinase 2, mitochondrial	NAKD2_MOUSE	-inf	1.8428e-05	5.47364e-05	1.59503e-05
Q8BGF6	Myo1b	Unconventional myosin-Ib	MYO1B_MOUSE	-inf	1.84989e-05	5.49134e-05	5.30656e-06
Q8BFQ4	Cbx1	Chromobox protein homolog 1	CBX1_MOUSE	-inf	1.85069e-05	5.49134e-05	6.65853e-06
Q8BWU8	Ppp1r11	E3 ubiquitin-protein ligase PPP1R11	PP1RB_MOUSE	-inf	1.85216e-05	5.49285e-05	9.71977e-06
Q8K2Q9	Tamm41	Phosphatidate cytidylyltransferase, mitochondrial	TAM41_MOUSE	-inf	1.85473e-05	5.49761e-05	6.17482e-06
Q4VBE8	Uhrf1bp1l	UHRF1-binding protein 1-like	UH1BL_MOUSE	-inf	1.85869e-05	5.50649e-05	1.0329e-05
Q9Z2Y3	Crocc	Rootletin	CROCC_MOUSE	-3.04041	1.87754e-05	5.55942e-05	0.000183022
Q8CA95	Tbc1d13	TBC1 domain family member 13	TBC13_MOUSE	-1.67093	1.8795e-05	5.56234e-05	0.00041876
Q8C5L3	Exoc1	Exocyst complex component 1	EXOC1_MOUSE	-inf	1.88267e-05	5.56885e-05	5.40488e-06
O89032	Ndufaf8	NADH dehydrogenase [ubiquinone] 1 alpha subcomplex assembly factor 8	NDUF8_MOUSE	-inf	1.88427e-05	5.57067e-05	4.46406e-06
Q4QQM5	Snx25	Sorting nexin-25	SNX25_MOUSE	-inf	1.88747e-05	5.57725e-05	4.78998e-06
Q5SYD0	Adar	Double-stranded RNA-specific adenosine deaminase	DSRAD_MOUSE	-inf	1.88921e-05	5.57949e-05	5.41691e-05
B2RY56	Mospd2	Motile sperm domain-containing protein 2	MSPD2_MOUSE	-inf	1.8979e-05	5.60224e-05	7.03812e-06
Q3UHK6	Mfn1	Mitofusin-1	MFN1_MOUSE	-inf	1.90339e-05	5.61462e-05	1.4855e-05
Q91VJ2	Psd	PH and SEC7 domain-containing protein 1	PSD1_MOUSE	-inf	1.90425e-05	5.61462e-05	3.98202e-06
P05532	Sltm	SAFB-like transcription modulator	SLTM_MOUSE	-inf	1.90505e-05	5.61462e-05	5.99956e-06
Q3U1Y4	Chordc1	Cysteine and histidine-rich domain-containing protein 1	CHRD1_MOUSE	-inf	1.90929e-05	5.62421e-05	3.24308e-06
Q99MP8	Ranbp10	Ran-binding protein 10	RBP10_MOUSE	-inf	1.91506e-05	5.63828e-05	2.00118e-06
Q7M6Y3	Celf1	CUGBP Elav-like family member 1	CELF1_MOUSE	4.52599	1.91722e-05	5.64173e-05	0.000612724
S4R2P9	Sf3a2	Splicing factor 3A subunit 2	SF3A2_MOUSE	-inf	1.92196e-05	5.65276e-05	5.49593e-06
Q01338	Ehbp1l1	EH domain-binding protein 1-like protein 1	EH1L1_MOUSE	-inf	1.92688e-05	5.66432e-05	5.07734e-06
Q8CAQ8	Rftn2	Raftlin-2	RFTN2_MOUSE	-1.21202	1.93271e-05	5.67709e-05	0.000527974
O70176	Srr	Serine racemase	SRR_MOUSE	-inf	1.93322e-05	5.67709e-05	6.96718e-06
O08663	Lingo3	Leucine-rich repeat and immunoglobulin-like domain-containing nogo receptor-interacting protein 3	LIGO3_MOUSE	-inf	1.94277e-05	5.7022e-05	2.71684e-05
Q99PL5	Cdc23	Cell division cycle protein 23 homolog	CDC23_MOUSE	1.36558	1.94399e-05	5.70283e-05	3.23138e-05
Q8CIV8	Otud7b	OTU domain-containing protein 7B	OTU7B_MOUSE	-inf	1.94592e-05	5.70555e-05	1.73441e-05
Q91VU6	Zfand2b	AN1-type zinc finger protein 2B	ZFN2B_MOUSE	-inf	1.95865e-05	5.73993e-05	1.85872e-06
Q924Z4	Tinagl1	Tubulointerstitial nephritis antigen-like	TINAL_MOUSE	-inf	1.96554e-05	5.7558e-05	9.00891e-06
Q80WB5	Prpf38a	Pre-mRNA-splicing factor 38A	PR38A_MOUSE	-inf	1.96609e-05	5.7558e-05	4.13814e-06
Q8BN59	Entpd5	Ectonucleoside triphosphate diphosphohydrolase 5	ENTP5_MOUSE	-inf	1.9686e-05	5.76021e-05	7.58123e-06
Q6P4T1	Ksr1	Kinase suppressor of Ras 1	KSR1_MOUSE	-inf	1.97084e-05	5.76379e-05	5.61637e-06
Q9CQU5	Fscn1	Fascin	FSCN1_MOUSE	-inf	1.98038e-05	5.78473e-05	1.0309e-05
Q8BUY8	Litaf	Lipopolysaccharide-induced tumor necrosis factor-alpha factor homolog	LITAF_MOUSE	-inf	1.98047e-05	5.78473e-05	2.67383e-06
Q9D8V0	Eif5a2	Eukaryotic translation initiation factor 5A-2	IF5A2_MOUSE	-inf	1.98158e-05	5.78473e-05	8.39595e-06
Q8BMJ3	Aatk	Serine/threonine-protein kinase LMTK1	LMTK1_MOUSE	-inf	1.98207e-05	5.78473e-05	7.76858e-06
Q91Z49	Sap18	Histone deacetylase complex subunit SAP18	SAP18_MOUSE	-inf	1.98307e-05	5.78473e-05	7.30817e-06
Q69ZZ6	Yars2	Tyrosine--tRNA ligase, mitochondrial	SYYM_MOUSE	-inf	1.98712e-05	5.79358e-05	7.394e-06
Q61481	Luzp1	Leucine zipper protein 1	LUZP1_MOUSE	-3.26874	1.99501e-05	5.81358e-05	0.000356711
O54724	Rasgrf1	Ras-specific guanine nucleotide-releasing factor 1	RGRF1_MOUSE	-inf	1.99609e-05	5.81376e-05	3.53935e-05
Q99ML4	Gon7	EKC/KEOPS complex subunit GON7	GON7_MOUSE	-inf	2.00577e-05	5.83897e-05	1.02128e-06
P60882	Smarca2	Probable global transcription activator SNF2L2	SMCA2_MOUSE	-inf	2.00934e-05	5.84637e-05	1.76378e-06
P50172	Eml1	Echinoderm microtubule-associated protein-like 1	EMAL1_MOUSE	-inf	2.0219e-05	5.87991e-05	5.54698e-06
Q8BX90	Timm44	Mitochondrial import inner membrane translocase subunit TIM44	TIM44_MOUSE	-inf	2.03496e-05	5.91489e-05	1.25843e-06
Q99JB2	Cog4	Conserved oligomeric Golgi complex subunit 4	COG4_MOUSE	-inf	2.0421e-05	5.93261e-05	3.19552e-05
Q9CZV8	Ttl	Tubulin--tyrosine ligase	TTL_MOUSE	-inf	2.04358e-05	5.93389e-05	7.11165e-06
Q9Z1X2	Pdcd2	Programmed cell death protein 2	PDCD2_MOUSE	-inf	2.05812e-05	5.97307e-05	1.33574e-05
Q6PDS3	Ppp2r2c	Serine/threonine-protein phosphatase 2A 55 kDa regulatory subunit B gamma isoform	2ABG_MOUSE	-inf	2.07068e-05	6.00644e-05	1.79257e-05
Q9CYR6	Itga1	Integrin alpha-1	ITA1_MOUSE	-inf	2.07374e-05	6.01227e-05	2.87668e-05
Q9JLR9	Adck1	AarF domain-containing protein kinase 1	ADCK1_MOUSE	-inf	2.07783e-05	6.02106e-05	1.04324e-05
Q8BFS6	Xpnpep3	Xaa-Pro aminopeptidase 3	XPP3_MOUSE	-inf	2.08157e-05	6.02882e-05	1.37887e-05
Q9Z0J0	Rps6ka1	Ribosomal protein S6 kinase alpha-1	KS6A1_MOUSE	-inf	2.08594e-05	6.03841e-05	1.89643e-05
Q3UFY8	Psen1	Presenilin-1	PSN1_MOUSE	-inf	2.0872e-05	6.03899e-05	5.79606e-06
Q923B0	Mrps17	28S ribosomal protein S17, mitochondrial	RT17_MOUSE	-inf	2.08944e-05	6.04239e-05	6.48481e-06
Q7TPD2	Ttc9b	Tetratricopeptide repeat protein 9B	TTC9B_MOUSE	-inf	2.10179e-05	6.07504e-05	3.03394e-06
Q9CRC8	Fh	Fumarate hydratase, mitochondrial	FUMH_MOUSE	-inf	2.10405e-05	6.07772e-05	1.91883e-05
Q9R190	Commd5	COMM domain-containing protein 5	COMD5_MOUSE	-inf	2.10485e-05	6.07772e-05	1.23618e-05
Q02105	Gatd3a	Glutamine amidotransferase-like class 1 domain-containing protein 3A, mitochondrial	GAL3A_MOUSE	2.54164	2.11169e-05	6.09295e-05	0.000165306
Q810A3	Hexim1	Protein HEXIM1	HEXI1_MOUSE	-inf	2.11227e-05	6.09295e-05	3.72871e-06
Q99JH7	Pi4k2a	Phosphatidylinositol 4-kinase type 2-alpha	P4K2A_MOUSE	-inf	2.11444e-05	6.09615e-05	8.32369e-06
Q9R099	Pde1a	Calcium/calmodulin-dependent 3',5'-cyclic nucleotide phosphodiesterase 1A	PDE1A_MOUSE	-inf	2.11875e-05	6.10548e-05	4.53436e-06
O89079	Smap1	Stromal membrane-associated protein 1	SMAP1_MOUSE	-inf	2.12501e-05	6.11647e-05	1.6437e-05
P70403	Osbpl2	Oxysterol-binding protein-related protein 2	OSBL2_MOUSE	-inf	2.12537e-05	6.11647e-05	8.93937e-07
Q99JR5	Ssbp1	Single-stranded DNA-binding protein, mitochondrial	SSBP_MOUSE	-inf	2.12579e-05	6.11647e-05	1.92874e-05
Q8BMF4	Mpv17	Protein Mpv17	MPV17_MOUSE	-1.55906	2.12774e-05	6.119e-05	0.001058
Q99P30	Ssu72	RNA polymerase II subunit A C-terminal domain phosphatase SSU72	SSU72_MOUSE	-inf	2.13006e-05	6.12259e-05	4.84447e-06
Q91ZH7	RtcA	RNA 3'-terminal phosphate cyclase	RTCA_MOUSE	-inf	2.13131e-05	6.12307e-05	6.36769e-06
P36895	Coq8a	Atypical kinase COQ8A, mitochondrial	COQ8A_MOUSE	-inf	2.142e-05	6.1507e-05	3.4029e-06
Q6PGC1	Sart3	Squamous cell carcinoma antigen recognized by T-cells 3	SART3_MOUSE	-inf	2.14317e-05	6.15097e-05	4.22472e-06
P09103	Slc35f1	Solute carrier family 35 member F1	S35F1_MOUSE	0.962627	2.16331e-05	6.20564e-05	0.000318971
Q14BV6	Map3k4	Mitogen-activated protein kinase kinase kinase 4	M3K4_MOUSE	-inf	2.17506e-05	6.234e-05	4.33193e-06
Q80U30	Srp9	Signal recognition particle 9 kDa protein	SRP09_MOUSE	-inf	2.17539e-05	6.234e-05	2.94691e-06
P60853	Lmbrd1	Probable lysosomal cobalamin transporter	LMBD1_MOUSE	-inf	2.17972e-05	6.24328e-05	1.4617e-05
Q8K4I3	Mob1b	MOB kinase activator 1B	MOB1B_MOUSE	-inf	2.18401e-05	6.24983e-05	2.4801e-06
Q9D0L4	Pnpt1	Polyribonucleotide nucleotidyltransferase 1, mitochondrial	PNPT1_MOUSE	-inf	2.18524e-05	6.24983e-05	1.17885e-05
P97314	Celf4	CUGBP Elav-like family member 4	CELF4_MOUSE	-inf	2.1853e-05	6.24983e-05	2.46131e-06
P97927	Ntsr2	Neurotensin receptor type 2	NTR2_MOUSE	-inf	2.19701e-05	6.28017e-05	6.09929e-06
Q99KK1	C1qtnf5	Complement C1q tumor necrosis factor-related protein 5	C1QT5_MOUSE	-inf	2.20021e-05	6.28616e-05	3.04526e-06
Q9WV32	Htr1b,Htr1b;HTR1B,HTR1B,HTR1B,HTR1B,HTR1B,HTR1B,HTR1B,HTR1B,HTR1B,HTR1B,HTR1B,HTR1B,HTR1B	5-hydroxytryptamine receptor 1B,5-hydroxytryptamine receptor 1B;5-hydroxytryptamine receptor 1B,5-hydroxytryptamine receptor 1B,5-hydroxytryptamine receptor 1B,5-hydroxytryptamine receptor 1B,5-hydroxytryptamine receptor 1B,5-hydroxytryptamine receptor 1B,5-hydroxytryptamine receptor 1B,5-hydroxytryptamine receptor 1B,5-hydroxytryptamine receptor 1B,5-hydroxytryptamine receptor 1B,5-hydroxytrypta…	5HT1B_MOUSE;5HT1B_PANTR	-inf	2.21638e-05	6.32917e-05	2.24562e-05
Q8BTW3	Tbc1d4	TBC1 domain family member 4	TBCD4_MOUSE	-inf	2.21943e-05	6.3347e-05	3.06602e-06
Q00560	Nubp1	Cytosolic Fe-S cluster assembly factor NUBP1	NUBP1_MOUSE	-inf	2.22269e-05	6.34085e-05	1.54004e-06
Q9Z223	Prdx3	Thioredoxin-dependent peroxide reductase, mitochondrial	PRDX3_MOUSE	-inf	2.22931e-05	6.35575e-05	1.06515e-05
Q8BYN3	Mtss2	Protein MTSS 2	MTSS2_MOUSE	-inf	2.23015e-05	6.35575e-05	1.00951e-05
[truncated: 3,698 more rows]

## Sheet: Bulk_v_APEX_Str
ProteinAccessions	Genes	ProteinDescriptions	ProteinNames	Log2FC	pvalue	qvalue	Expr
P52503	Ndufs6	NADH dehydrogenase [ubiquinone] iron-sulfur protein 6, mitochondrial	NDUS6_MOUSE	-4.8079	9.91364e-11	5.6478e-07	0.000275143
Q8CF89	Tab1	TGF-beta-activated kinase 1 and MAP3K7-binding protein 1	TAB1_MOUSE	4.12455	5.10219e-10	1.45336e-06	2.31636e-05
Q9CR68	Uqcrfs1	Cytochrome b-c1 complex subunit Rieske, mitochondrial	UCRI_MOUSE	-3.04809	1.05403e-09	2.0016e-06	0.000633042
Q3UEZ8	Slc10a4	Sodium/bile acid cotransporter 4	NTCP4_MOUSE	4.37817	1.41763e-09	2.01905e-06	0.000233947
P12787	Cox5a	Cytochrome c oxidase subunit 5A, mitochondrial	COX5A_MOUSE	-4.66841	2.90135e-09	2.62661e-06	0.00111404
P51163	Uros	Uroporphyrinogen-III synthase	HEM4_MOUSE	-inf	3.23137e-09	2.62661e-06	1.15857e-05
Q60790	Rasa3	Ras GTPase-activating protein 3	RASA3_MOUSE	-inf	3.5292e-09	2.62661e-06	1.19037e-05
Q6NXK7	Dpp10	Inactive dipeptidyl peptidase 10	DPP10_MOUSE	-3.29439	3.68841e-09	2.62661e-06	0.000165876
O08795	Prkcsh	Glucosidase 2 subunit beta	GLU2B_MOUSE	-4.27948	5.07991e-09	2.76198e-06	0.000109056
Q5NCF2	Trappc1	Trafficking protein particle complex subunit 1	TPPC1_MOUSE	-inf	5.37917e-09	2.76198e-06	2.06e-05
P51150	Rab7a	Ras-related protein Rab-7a	RAB7A_MOUSE	1.14589	5.43034e-09	2.76198e-06	0.000702007
Q8C9H6	Strip2	Striatin-interacting proteins 2	STRP2_MOUSE	-inf	5.90394e-09	2.76198e-06	1.25355e-05
Q80TH2	Erbin	Erbin	ERBIN_MOUSE	-inf	6.75415e-09	2.76198e-06	1.89557e-05
Q69ZU6	Thsd7a	Thrombospondin type-1 domain-containing protein 7A	THS7A_MOUSE	-inf	6.78739e-09	2.76198e-06	1.50313e-05
Q6NV83	U2surp	U2 snRNP-associated SURP motif-containing protein	SR140_MOUSE	-inf	7.67224e-09	2.83197e-06	5.2547e-06
Q8BGX2	Timm29	Mitochondrial import inner membrane translocase subunit Tim29	TIM29_MOUSE	-inf	8.74789e-09	2.83197e-06	4.25835e-05
O35658	C1qbp	Complement component 1 Q subcomponent-binding protein, mitochondrial,Complement component 1 Q subcomponent-binding protein, mitochondrial	C1QBP_MOUSE	-inf	9.80053e-09	2.83197e-06	0.000356347
Q80UG5	Septin9	Septin-9	SEPT9_MOUSE	-inf	1.01476e-08	2.83197e-06	7.19043e-05
Q8C754	Vps52	Vacuolar protein sorting-associated protein 52 homolog	VPS52_MOUSE	-inf	1.02505e-08	2.83197e-06	1.99382e-05
P53811	Pitpnb	Phosphatidylinositol transfer protein beta isoform	PIPNB_MOUSE	-inf	1.0296e-08	2.83197e-06	0.000101545
O89084	Pde4a	cAMP-specific 3',5'-cyclic phosphodiesterase 4A	PDE4A_MOUSE	-inf	1.12228e-08	2.83197e-06	2.25897e-05
P11352	Gpx1	Glutathione peroxidase 1	GPX1_MOUSE	-inf	1.12747e-08	2.83197e-06	4.66125e-05
Q9ET26	Rnf114	E3 ubiquitin-protein ligase RNF114	RN114_MOUSE	4.59635	1.17123e-08	2.83197e-06	4.66887e-05
P47962	Rpl5	60S ribosomal protein L5	RL5_MOUSE	-1.74132	1.2289e-08	2.83197e-06	9.05327e-05
Q9D5V5	Cul5	Cullin-5	CUL5_MOUSE	-inf	1.27724e-08	2.83197e-06	3.77025e-05
Q8C4Q6	Aida	Axin interactor, dorsalization-associated protein	AIDA_MOUSE	-inf	1.29246e-08	2.83197e-06	1.78993e-05
O88910	Mpp3	MAGUK p55 subfamily member 3	MPP3_MOUSE	-inf	1.40749e-08	2.9698e-06	4.27355e-05
P05480	Src	Neuronal proto-oncogene tyrosine-protein kinase Src	SRC_MOUSE	-inf	1.59328e-08	3.04863e-06	4.61373e-05
P00405	Mtco2;MT-CO2,MT-CO2,MT-CO2,MT-CO2,MT-CO2,MT-CO2,MT-CO2,MT-CO2,MT-CO2,MT-CO2,MT-CO2,MT-CO2,MT-CO2,MT-CO2	Cytochrome c oxidase subunit 2	COX2_MOUSE;COX2_PERFA,COX2_HYLPR,COX2_HYBUN,COX2_ACOWI,COX2_APOSM,COX2_LEMBA,COX2_MALTY,COX2_APOMY,COX2_RHAPU,COX2_LEGFO,COX2_PRAJA,COX2_ZELHI,COX2_MICTV,COX2_ACOIG	-inf	1.63923e-08	3.04863e-06	0.00152444
Q62277	Syp	Synaptophysin	SYPH_MOUSE	4.03085	1.74448e-08	3.04863e-06	0.0211123
Q9R0M6	Rab9a	Ras-related protein Rab-9A	RAB9A_MOUSE	-inf	1.84494e-08	3.04863e-06	2.38637e-05
Q5DU25	Iqsec2	IQ motif and SEC7 domain-containing protein 2	IQEC2_MOUSE	-inf	1.85375e-08	3.04863e-06	9.36287e-05
Q9CR21	Ndufab1	Acyl carrier protein, mitochondrial	ACPM_MOUSE	-inf	1.85743e-08	3.04863e-06	0.00016184
Q9DCC8	Tomm20	Mitochondrial import receptor subunit TOM20 homolog	TOM20_MOUSE	-inf	1.88143e-08	3.04863e-06	8.59481e-05
Q5H8C4	Vps13a	Vacuolar protein sorting-associated protein 13A	VP13A_MOUSE	-inf	1.88819e-08	3.04863e-06	1.8633e-05
P47934	Crat	Carnitine O-acetyltransferase	CACP_MOUSE	-inf	1.97009e-08	3.04863e-06	3.32503e-05
Q9WTT4	Atp6v1g2	V-type proton ATPase subunit G 2	VATG2_MOUSE	-3.65261	2.00783e-08	3.04863e-06	0.000358453
Q9R022	Dnajc12	DnaJ homolog subfamily C member 12	DJC12_MOUSE	6.46881	2.03349e-08	3.04863e-06	0.000201552
Q91ZP9	Necab2	N-terminal EF-hand calcium-binding protein 2	NECA2_MOUSE	-inf	2.20592e-08	3.22234e-06	6.62736e-05
Q8VBV7	Cops8	COP9 signalosome complex subunit 8	CSN8_MOUSE	-inf	2.42778e-08	3.26128e-06	6.29318e-05
Q9QXX4	Slc25a13	Calcium-binding mitochondrial carrier protein Aralar2	CMC2_MOUSE	-inf	2.44303e-08	3.26128e-06	0.000472541
Q9D0S9	Hint2	Histidine triad nucleotide-binding protein 2, mitochondrial	HINT2_MOUSE	-inf	2.46879e-08	3.26128e-06	8.13444e-05
Q9WTX2	Prkra	Interferon-inducible double-stranded RNA-dependent protein kinase activator A	PRKRA_MOUSE	-inf	2.4765e-08	3.26128e-06	8.34061e-06
Q61696	Hspa1a	Heat shock 70 kDa protein 1A	HS71A_MOUSE	-inf	2.62598e-08	3.26128e-06	0.0010592
Q8CDG3	Vcpip1	Deubiquitinating protein VCIP135	VCIP1_MOUSE	-inf	2.6424e-08	3.26128e-06	2.26385e-05
Q63932	Map2k2	Dual specificity mitogen-activated protein kinase kinase 2	MP2K2_MOUSE	-inf	2.65897e-08	3.26128e-06	0.000220567
Q9JIG7	Ccdc22	Coiled-coil domain-containing protein 22	CCD22_MOUSE	-inf	2.79058e-08	3.26128e-06	9.60172e-06
Q99PV0	Prpf8	Pre-mRNA-processing-splicing factor 8	PRP8_MOUSE	-inf	2.79538e-08	3.26128e-06	1.55374e-05
Q9Z0P5	Twf2	Twinfilin-2	TWF2_MOUSE	-inf	2.95677e-08	3.26128e-06	4.85225e-05
P54869	Hmgcs2	Hydroxymethylglutaryl-CoA synthase, mitochondrial	HMCS2_MOUSE	-inf	2.96776e-08	3.26128e-06	9.43207e-06
P14733	Lmnb1	Lamin-B1	LMNB1_MOUSE	-inf	3.00103e-08	3.26128e-06	5.54717e-05
Q99KX1	Mlf2	Myeloid leukemia factor 2	MLF2_MOUSE	-inf	3.05644e-08	3.26128e-06	7.78904e-05
Q925I1	Atad3	ATPase family AAA domain-containing protein 3	ATAD3_MOUSE	-inf	3.20829e-08	3.26128e-06	6.83996e-05
Q9QZX7	Srr	Serine racemase	SRR_MOUSE	-2.37784	3.22193e-08	3.26128e-06	0.000101054
Q8VDM6	Hnrnpul1	Heterogeneous nuclear ribonucleoprotein U-like protein 1	HNRL1_MOUSE	-inf	3.36226e-08	3.26128e-06	1.96078e-05
P45878	Fkbp2	Peptidyl-prolyl cis-trans isomerase FKBP2	FKBP2_MOUSE	-inf	3.57121e-08	3.26128e-06	9.29618e-05
Q8JZZ7	Adgrl2	Adhesion G protein-coupled receptor L2	AGRL2_MOUSE	-inf	3.79025e-08	3.26128e-06	1.61704e-05
Q9EQ80	Nif3l1	NIF3-like protein 1	NIF3L_MOUSE	-inf	3.8133e-08	3.26128e-06	5.43002e-05
Q9D3P8	Plgrkt	Plasminogen receptor (KT)	PLRKT_MOUSE	-inf	3.86273e-08	3.26128e-06	2.08463e-05
Q99KE1	Me2	NAD-dependent malic enzyme, mitochondrial	MAOM_MOUSE	-1.91724	3.8849e-08	3.26128e-06	9.388e-05
Q3UBX0	Tmem109	Transmembrane protein 109	TM109_MOUSE	-inf	3.94691e-08	3.26128e-06	2.85247e-05
Q8CAK1	Iba57	Putative transferase CAF17 homolog, mitochondrial	CAF17_MOUSE	-inf	3.98196e-08	3.26128e-06	2.01243e-05
Q03517	Scg2	Secretogranin-2	SCG2_MOUSE	-inf	4.02388e-08	3.26128e-06	0.000243962
Q9D4H1	Exoc2	Exocyst complex component 2	EXOC2_MOUSE	-inf	4.06732e-08	3.26128e-06	2.5827e-05
Q9CPV9	P2ry12	P2Y purinoceptor 12	P2Y12_MOUSE	-inf	4.07436e-08	3.26128e-06	1.72852e-05
Q9CYI4	Luc7l	Putative RNA-binding protein Luc7-like 1	LUC7L_MOUSE	-inf	4.12271e-08	3.26128e-06	9.98403e-06
Q9JJ28	Flii	Protein flightless-1 homolog	FLII_MOUSE	-inf	4.15761e-08	3.26128e-06	1.10399e-05
Q3UKC1	Tax1bp1	Tax1-binding protein 1 homolog	TAXB1_MOUSE	2.76736	4.35064e-08	3.26128e-06	6.25726e-05
Q9DB27	Mcts1	Malignant T-cell-amplified sequence 1	MCTS1_MOUSE	-inf	4.35728e-08	3.26128e-06	4.32681e-05
Q8R3Q6	Ccdc58	Coiled-coil domain-containing protein 58	CCD58_MOUSE	-inf	4.38997e-08	3.26128e-06	1.60831e-05
Q9EPE9	Atp13a1	Manganese-transporting ATPase 13A1	AT131_MOUSE	-inf	4.40393e-08	3.26128e-06	1.44242e-05
Q9D8Y0	Efhd2	EF-hand domain-containing protein D2	EFHD2_MOUSE	-3.81647	4.49688e-08	3.26128e-06	0.000277066
Q6PHZ8	Kcnip4;KCNIP4	Kv channel-interacting protein 4	KCIP4_MOUSE;KCIP4_HUMAN	-inf	4.54773e-08	3.26128e-06	2.16428e-05
Q9CWF6	Bbs2	Bardet-Biedl syndrome 2 protein homolog	BBS2_MOUSE	-inf	4.57786e-08	3.26128e-06	1.54642e-05
Q9QYS9	Qki	Protein quaking	QKI_MOUSE	-inf	4.60953e-08	3.26128e-06	2.29561e-05
Q8R164	Bphl	Valacyclovir hydrolase	BPHL_MOUSE	-inf	4.63392e-08	3.26128e-06	0.000127562
P70182	Pip5k1a	Phosphatidylinositol 4-phosphate 5-kinase type-1 alpha	PI51A_MOUSE	-inf	4.64909e-08	3.26128e-06	8.56383e-05
Q9CRD2	Emc2	ER membrane protein complex subunit 2	EMC2_MOUSE	-inf	4.85572e-08	3.26128e-06	1.54943e-05
Q8BJS4	Sun2	SUN domain-containing protein 2	SUN2_MOUSE	-10.1069	4.87041e-08	3.26128e-06	4.3895e-06
Q6P5E8	Dgkq	Diacylglycerol kinase theta	DGKQ_MOUSE	3.09359	4.87598e-08	3.26128e-06	9.85672e-05
Q6PD03	Ppp2r5a	Serine/threonine-protein phosphatase 2A 56 kDa regulatory subunit alpha isoform	2A5A_MOUSE	1.27115	5.02662e-08	3.26128e-06	6.83126e-05
P13504	Il1r1	Interleukin-1 receptor type 1	IL1R1_MOUSE	-inf	5.1176e-08	3.26128e-06	8.90957e-05
Q9D1L9	Lamtor5	Ragulator complex protein LAMTOR5	LTOR5_MOUSE	-inf	5.11883e-08	3.26128e-06	2.53999e-05
P0C027	Nudt10;Nudt11	Diphosphoinositol polyphosphate phosphohydrolase 3-alpha;Diphosphoinositol polyphosphate phosphohydrolase 3-beta	NUD10_MOUSE;NUD11_MOUSE	-inf	5.15424e-08	3.26128e-06	5.64147e-05
P62869	Elob	Elongin-B	ELOB_MOUSE	-inf	5.18625e-08	3.26128e-06	0.000109805
Q9CQE3	Mrps17	28S ribosomal protein S17, mitochondrial	RT17_MOUSE	-inf	5.28457e-08	3.26128e-06	5.3761e-06
Q9CYW4	Hdhd3	Haloacid dehalogenase-like hydrolase domain-containing protein 3	HDHD3_MOUSE	-inf	5.30664e-08	3.26128e-06	1.8447e-05
Q6PDM2	Srsf1	Serine/arginine-rich splicing factor 1	SRSF1_MOUSE	-4.18856	5.36286e-08	3.26128e-06	0.000186557
Q7TMF3	Ndufa12	NADH dehydrogenase [ubiquinone] 1 alpha subcomplex subunit 12	NDUAC_MOUSE	-2.73188	5.3733e-08	3.26128e-06	0.00014838
Q04750	Top1	DNA topoisomerase 1	TOP1_MOUSE	-inf	5.44916e-08	3.26128e-06	1.20997e-05
O35495	Cdk14	Cyclin-dependent kinase 14	CDK14_MOUSE	3.40715	5.48092e-08	3.26128e-06	8.76855e-05
O88952	Lin7c	Protein lin-7 homolog C	LIN7C_MOUSE	-inf	5.52e-08	3.26128e-06	9.1557e-05
Q9D0T1	Snu13	NHP2-like protein 1	NH2L1_MOUSE	-inf	5.5606e-08	3.26128e-06	3.94471e-05
P63260	Actg1;ACTG1	Actin, cytoplasmic 2;Actin, cytoplasmic 2	ACTG_MOUSE;ACTG_BOVIN	-inf	5.57203e-08	3.26128e-06	0.00111582
Q9QYJ3	Dnajb1	DnaJ homolog subfamily B member 1	DNJB1_MOUSE	-inf	5.63095e-08	3.26128e-06	2.97513e-05
A2A8L5	Ptprf	Receptor-type tyrosine-protein phosphatase F	PTPRF_MOUSE	-inf	5.72277e-08	3.26128e-06	8.64721e-06
Q9WVA2	Timm8a1	Mitochondrial import inner membrane translocase subunit Tim8 A	TIM8A_MOUSE	-inf	5.80081e-08	3.26128e-06	4.52805e-05
O35593	Psmd14	26S proteasome non-ATPase regulatory subunit 14	PSDE_MOUSE	-inf	5.83898e-08	3.26128e-06	5.89588e-05
Q3TC72	Fahd2	Fumarylacetoacetate hydrolase domain-containing protein 2A	FAHD2_MOUSE	-inf	5.86829e-08	3.26128e-06	9.64746e-05
Q3TEA8	Hp1bp3	Heterochromatin protein 1-binding protein 3	HP1B3_MOUSE	-inf	5.973e-08	3.26128e-06	8.83566e-05
Q8C437	Pex5l	PEX5-related protein	PEX5R_MOUSE	3.12196	6.02898e-08	3.26128e-06	0.00024903
Q9WUA6	Akt3	RAC-gamma serine/threonine-protein kinase	AKT3_MOUSE	2.21565	6.11711e-08	3.26128e-06	5.43031e-05
Q3TPX4	Exoc5	Exocyst complex component 5	EXOC5_MOUSE	-inf	6.11849e-08	3.26128e-06	2.5032e-05
A2ASZ8	Slc25a25	Calcium-binding mitochondrial carrier protein SCaMC-2	SCMC2_MOUSE	-inf	6.17316e-08	3.26128e-06	3.09721e-05
Q91VR8	Brk1	Protein BRICK1	BRK1_MOUSE	-inf	6.19404e-08	3.26128e-06	0.000136883
Q8BH47	Sec22a	Vesicle-trafficking protein SEC22a	SC22A_MOUSE	-inf	6.29162e-08	3.26128e-06	3.61138e-06
Q9Z2D1	Mtmr2	Myotubularin-related protein 2	MTMR2_MOUSE	-inf	6.30147e-08	3.26128e-06	1.75579e-05
P97478	Coq7	5-demethoxyubiquinone hydroxylase, mitochondrial,5-demethoxyubiquinone hydroxylase, mitochondrial (Fragment)	COQ7_MOUSE	-inf	6.33758e-08	3.26128e-06	1.88741e-05
Q03059	Chat	Choline O-acetyltransferase	CLAT_MOUSE	-inf	6.33792e-08	3.26128e-06	3.09624e-05
P54763	Ephb2;EPHB2	Ephrin type-B receptor 2	EPHB2_MOUSE;EPHB2_HUMAN	-inf	6.42871e-08	3.26128e-06	2.32246e-06
Q9CQ86	Mien1	Migration and invasion enhancer 1	MIEN1_MOUSE	-inf	6.5111e-08	3.26128e-06	7.4119e-05
P56380	Nudt2	Bis(5'-nucleosyl)-tetraphosphatase [asymmetrical]	AP4A_MOUSE	-inf	6.51395e-08	3.26128e-06	2.69408e-05
P45591	Cfl2	Cofilin-2	COF2_MOUSE	-inf	6.52512e-08	3.26128e-06	0.000126552
Q8BWG8	Arrb1	Beta-arrestin-1	ARRB1_MOUSE	-inf	6.67223e-08	3.26128e-06	3.76513e-05
Q9JIY5	Htra2	Serine protease HTRA2, mitochondrial	HTRA2_MOUSE	-inf	6.78537e-08	3.26128e-06	2.40247e-05
Q9CQV6	Map1lc3b	Microtubule-associated proteins 1A/1B light chain 3B	MLP3B_MOUSE	-inf	6.85377e-08	3.26128e-06	0.000345617
Q924T2	Mrps2	28S ribosomal protein S2, mitochondrial	RT02_MOUSE	-inf	6.96779e-08	3.26128e-06	1.12196e-05
Q7TNS2	Micos10	MICOS complex subunit Mic10	MIC10_MOUSE	-inf	6.98186e-08	3.26128e-06	3.14479e-05
A2A5R2	Arfgef2	Brefeldin A-inhibited guanine nucleotide-exchange protein 2	BIG2_MOUSE	-inf	7.09915e-08	3.26128e-06	1.94787e-05
P47758	Srprb	Signal recognition particle receptor subunit beta	SRPRB_MOUSE	-inf	7.10336e-08	3.26128e-06	6.70158e-06
Q9DCZ4	Apoo	MICOS complex subunit Mic26	MIC26_MOUSE	-2.62967	7.34381e-08	3.26128e-06	0.000367186
Q60875	Arhgef2	Rho guanine nucleotide exchange factor 2	ARHG2_MOUSE	-inf	7.386e-08	3.26128e-06	5.67761e-05
O88696	Clpp	ATP-dependent Clp protease proteolytic subunit, mitochondrial	CLPP_MOUSE	-inf	7.41164e-08	3.26128e-06	6.19408e-05
Q3UH93	Plxnd1	Plexin-D1	PLXD1_MOUSE	-inf	7.59783e-08	3.26128e-06	2.16381e-05
Q8CAK3	Shfl	Shiftless antiviral inhibitor of ribosomal frameshifting protein homolog	SHFL_MOUSE	-inf	7.80169e-08	3.26128e-06	9.88314e-06
Q8K4Z5	Sf3a1	Splicing factor 3A subunit 1	SF3A1_MOUSE	-inf	7.88408e-08	3.26128e-06	1.98253e-05
Q8K019	Bclaf1	Bcl-2-associated transcription factor 1	BCLF1_MOUSE	-inf	7.89769e-08	3.26128e-06	8.18494e-05
Q8BPU7	Elmo1	Engulfment and cell motility protein 1	ELMO1_MOUSE	-inf	7.98051e-08	3.26128e-06	1.56268e-05
Q64442	Sord	Sorbitol dehydrogenase	DHSO_MOUSE	-inf	8.03374e-08	3.26128e-06	3.72149e-05
Q9D6U8	Fam162a	Protein FAM162A	F162A_MOUSE	-inf	8.03973e-08	3.26128e-06	8.93086e-05
Q9D1T0	Lingo1	Leucine-rich repeat and immunoglobulin-like domain-containing nogo receptor-interacting protein 1	LIGO1_MOUSE	-inf	8.06305e-08	3.26128e-06	7.68767e-05
Q80UU9	Pgrmc2	Membrane-associated progesterone receptor component 2	PGRC2_MOUSE	-inf	8.09581e-08	3.26128e-06	0.000107825
Q60714	Slc27a1	Long-chain fatty acid transport protein 1	S27A1_MOUSE	-inf	8.15904e-08	3.26128e-06	1.79185e-05
P27661	H2afx	Histone H2AX	H2AX_MOUSE	-inf	8.29043e-08	3.26128e-06	0.00067048
Q8JZY2	Commd10	COMM domain-containing protein 10	COMDA_MOUSE	-inf	8.32911e-08	3.26128e-06	1.77584e-05
P62996	Tra2b	Transformer-2 protein homolog beta	TRA2B_MOUSE	-inf	8.33409e-08	3.26128e-06	3.60017e-05
Q8BHG2	Czib	CXXC motif containing zinc binding protein	CZIB_MOUSE	-inf	8.35279e-08	3.26128e-06	2.66174e-05
Q99K85	Psat1	Phosphoserine aminotransferase	SERC_MOUSE	-inf	8.38503e-08	3.26128e-06	0.000139305
O89001	Cpd	Carboxypeptidase D	CBPD_MOUSE	-inf	8.42071e-08	3.26128e-06	7.33877e-06
Q9CQV1	Pam16	Mitochondrial import inner membrane translocase subunit TIM16	TIM16_MOUSE	-inf	8.5148e-08	3.26128e-06	1.80791e-05
Q9CR98	Fam136a	Protein FAM136A	F136A_MOUSE	-inf	8.67779e-08	3.26128e-06	6.48075e-05
Q64669	Nqo1	NAD(P)H dehydrogenase [quinone] 1	NQO1_MOUSE	-inf	8.68635e-08	3.26128e-06	8.20814e-06
Q8CCK0	H2afy2	Core histone macro-H2A.2	H2AW_MOUSE	-inf	8.76812e-08	3.26128e-06	4.32236e-05
Q9D6Z1	Nop56	Nucleolar protein 56	NOP56_MOUSE	-inf	8.82008e-08	3.26128e-06	2.53406e-05
Q9JJI8	Rpl38	60S ribosomal protein L38	RL38_MOUSE	-inf	8.85337e-08	3.26128e-06	6.63495e-05
Q64331	Myo6	Unconventional myosin-VI	MYO6_MOUSE	-inf	8.96816e-08	3.26128e-06	2.59853e-05
Q8BGN5	Nipal3	NIPA-like protein 3	NPAL3_MOUSE	3.3	9.00316e-08	3.26128e-06	5.46846e-05
O70133	Dhx9	ATP-dependent RNA helicase A	DHX9_MOUSE	-inf	9.00828e-08	3.26128e-06	6.88308e-05
Q3UUI3	Them4	Acyl-coenzyme A thioesterase THEM4	THEM4_MOUSE	-inf	9.08785e-08	3.26128e-06	0.000100934
Q8K245	Uvrag	UV radiation resistance-associated protein	UVRAG_MOUSE	3.82495	9.1719e-08	3.26128e-06	2.73596e-05
Q62226	Shh;SHH	Sonic hedgehog protein	SHH_MOUSE;SHH_HUMAN	11.4753	9.19077e-08	3.26128e-06	0.00262337
Q9QZH3	Ppie	Peptidyl-prolyl cis-trans isomerase E	PPIE_MOUSE	-inf	9.2279e-08	3.26128e-06	0.000859723
O88531	Ppt1	Palmitoyl-protein thioesterase 1	PPT1_MOUSE	-inf	9.22825e-08	3.26128e-06	3.48955e-05
Q9DCA2	Mrps11	28S ribosomal protein S11, mitochondrial	RT11_MOUSE	-inf	9.26159e-08	3.26128e-06	9.4921e-06
P63141	Kcna2	Potassium voltage-gated channel subfamily A member 2	KCNA2_MOUSE	3.47577	9.30006e-08	3.26128e-06	0.000276486
Q9CPR5	Mrpl15	39S ribosomal protein L15, mitochondrial	RM15_MOUSE	-inf	9.31626e-08	3.26128e-06	6.7439e-06
Q921G7	Etfdh	Electron transfer flavoprotein-ubiquinone oxidoreductase, mitochondrial	ETFD_MOUSE	-inf	9.32392e-08	3.26128e-06	0.000111643
Q80WW9	Ddrgk1	DDRGK domain-containing protein 1	DDRGK_MOUSE	-inf	9.34261e-08	3.26128e-06	7.51395e-06
P08556	Nras	GTPase NRas	RASN_MOUSE	-inf	9.36631e-08	3.26128e-06	7.57907e-05
Q8R1V4	Tmed4	Transmembrane emp24 domain-containing protein 4	TMED4_MOUSE	-inf	9.39641e-08	3.26128e-06	1.2415e-05
Q8VC30	Tkfc	Triokinase/FMN cyclase	TKFC_MOUSE	-inf	9.42986e-08	3.26128e-06	9.3575e-06
Q8VE85	Prelid3a	PRELI domain containing protein 3A	PLD3A_MOUSE	-inf	9.47732e-08	3.26128e-06	6.33061e-06
P45952	Acadm	Medium-chain specific acyl-CoA dehydrogenase, mitochondrial	ACADM_MOUSE	-inf	9.52476e-08	3.26128e-06	6.90408e-05
Q8BGA9	Oxa1l	Mitochondrial inner membrane protein OXA1L	OXA1L_MOUSE	-inf	9.53782e-08	3.26128e-06	1.32643e-05
Q9D938	Tmem160	Transmembrane protein 160	TM160_MOUSE	-inf	9.59884e-08	3.26128e-06	1.47039e-05
Q9CQ19	Myl9	Myosin regulatory light polypeptide 9	MYL9_MOUSE	-inf	9.61114e-08	3.26128e-06	0.000103347
Q8BH86	Dglucy	D-glutamate cyclase, mitochondrial	GLUCM_MOUSE	-inf	9.62206e-08	3.26128e-06	1.60851e-05
P48318	Gad1	Glutamate decarboxylase 1	DCE1_MOUSE	-inf	9.63702e-08	3.26128e-06	0.000150122
Q3TXX3	Zfyve27	Protrudin	ZFY27_MOUSE	-inf	9.67449e-08	3.26128e-06	4.10889e-06
Q99NB9	Sf3b1	Splicing factor 3B subunit 1	SF3B1_MOUSE	-inf	9.78662e-08	3.27034e-06	1.69203e-05
Q91VF2	Hnmt	Histamine N-methyltransferase	HNMT_MOUSE	-inf	9.88046e-08	3.27034e-06	2.64018e-05
Q9DB15	Mrpl12	39S ribosomal protein L12, mitochondrial	RM12_MOUSE	-inf	1.00159e-07	3.27034e-06	0.000106846
P29758	Oat	Ornithine aminotransferase, mitochondrial	OAT_MOUSE	-inf	1.00807e-07	3.27034e-06	5.96151e-05
P47199	Cryz	Quinone oxidoreductase	QOR_MOUSE	-1.91433	1.00922e-07	3.27034e-06	7.61221e-05
O89106	Fhit	Bis(5'-adenosyl)-triphosphatase	FHIT_MOUSE	-inf	1.01401e-07	3.27034e-06	1.61831e-05
Q9JJR8	Tmem9b	Transmembrane protein 9B	TMM9B_MOUSE	-inf	1.02378e-07	3.27034e-06	4.71877e-05
Q8VE09	Ttc39c	Tetratricopeptide repeat protein 39C	TT39C_MOUSE	-inf	1.02693e-07	3.27034e-06	8.32613e-06
Q922H4	Gmppa	Mannose-1-phosphate guanyltransferase alpha	GMPPA_MOUSE	-inf	1.03283e-07	3.27034e-06	1.39907e-05
Q6PEB6	Mob4	MOB-like protein phocein	PHOCN_MOUSE	-inf	1.03788e-07	3.27034e-06	5.79561e-05
Q9D882	Fam241b	Protein FAM241B	F241B_MOUSE	-inf	1.04045e-07	3.27034e-06	2.04813e-05
Q920N7	Syt12	Synaptotagmin-12	SYT12_MOUSE	-inf	1.04821e-07	3.27034e-06	3.63781e-05
Q9CPU2	Ndufb2	NADH dehydrogenase [ubiquinone] 1 beta subcomplex subunit 2, mitochondrial	NDUB2_MOUSE	-inf	1.05044e-07	3.27034e-06	0.000248627
Q8BUK6	Hook3	Protein Hook homolog 3	HOOK3_MOUSE	-2.29116	1.0505e-07	3.27034e-06	2.29315e-05
P60710	Actb;ACTB,ACTB	Actin, cytoplasmic 1;Actin, cytoplasmic 1,Actin, cytoplasmic 1	ACTB_MOUSE;ACTB_BOVIN,ACTB_HUMAN	-inf	1.06143e-07	3.2864e-06	0.00941781
O35435	Dhodh	Dihydroorotate dehydrogenase (quinone), mitochondrial	PYRD_MOUSE	-inf	1.06987e-07	3.29463e-06	1.56842e-05
Q9JIK9	Mrps34	28S ribosomal protein S34, mitochondrial	RT34_MOUSE	-inf	1.07814e-07	3.30225e-06	1.73581e-05
Q8VEJ9	Vps4a	Vacuolar protein sorting-associated protein 4A	VPS4A_MOUSE	-inf	1.08477e-07	3.30419e-06	3.28709e-05
P70372	Elavl1	ELAV-like protein 1	ELAV1_MOUSE	-2.98094	1.09379e-07	3.30419e-06	0.000103817
Q8K4Z0	Lgi2	Leucine-rich repeat LGI family member 2	LGI2_MOUSE	-inf	1.09618e-07	3.30419e-06	1.22951e-05
Q9CZR3	Tomm40l	Mitochondrial import receptor subunit TOM40B	TM40L_MOUSE	-inf	1.1094e-07	3.32096e-06	2.28587e-05
Q9JKK1	Stx6	Syntaxin-6	STX6_MOUSE	-inf	1.11552e-07	3.32096e-06	3.4407e-05
P50136	Bckdha	2-oxoisovalerate dehydrogenase subunit alpha, mitochondrial	ODBA_MOUSE	-inf	1.13355e-07	3.32096e-06	1.0329e-05
O54984	Asna1	ATPase Asna1	ASNA_MOUSE	-inf	1.13642e-07	3.32096e-06	0.00011307
Q9WTS5	Tenm2	Teneurin-2	TEN2_MOUSE	-inf	1.13872e-07	3.32096e-06	0.00033095
Q9QYA2	Tomm40	Mitochondrial import receptor subunit TOM40 homolog	TOM40_MOUSE	-inf	1.14905e-07	3.32096e-06	6.73066e-05
O70274	Ptp4a2	Protein tyrosine phosphatase type IVA 2	TP4A2_MOUSE	-inf	1.15232e-07	3.32096e-06	1.87988e-05
P34914	Ephx2	Bifunctional epoxide hydrolase 2	HYES_MOUSE	-inf	1.15352e-07	3.32096e-06	3.71114e-05
Q8BHF7	Pgs1	CDP-diacylglycerol--glycerol-3-phosphate 3-phosphatidyltransferase, mitochondrial	PGPS1_MOUSE	-inf	1.15764e-07	3.32096e-06	1.84639e-05
Q8BKX1	Baiap2	Brain-specific angiogenesis inhibitor 1-associated protein 2	BAIP2_MOUSE	-3.81352	1.16096e-07	3.32096e-06	0.000150029
Q6NVG1	Lpcat4	Lysophospholipid acyltransferase LPCAT4	LPCT4_MOUSE	-inf	1.16586e-07	3.32096e-06	1.86597e-05
Q3UVK0	Ermp1	Endoplasmic reticulum metallopeptidase 1	ERMP1_MOUSE	-inf	1.18017e-07	3.32598e-06	1.12746e-05
P70202	Lxn	Latexin	LXN_MOUSE	-inf	1.18667e-07	3.32598e-06	6.61401e-05
Q60668	Hnrnpd	Heterogeneous nuclear ribonucleoprotein D0	HNRPD_MOUSE	-3.84	1.19069e-07	3.32598e-06	0.000291934
Q9DBX3	Susd2	Sushi domain-containing protein 2	SUSD2_MOUSE	-inf	1.19098e-07	3.32598e-06	1.12838e-05
Q9CY66	Gar1	H/ACA ribonucleoprotein complex subunit 1	GAR1_MOUSE	-inf	1.20131e-07	3.33848e-06	1.0695e-05
P28271	Aco1	Cytoplasmic aconitate hydratase	ACOC_MOUSE	-inf	1.21387e-07	3.34335e-06	0.000226602
P12961	Scg5	Neuroendocrine protein 7B2	7B2_MOUSE	-inf	1.22524e-07	3.34335e-06	5.2757e-05
Q9D7J4	Cox20	Cytochrome c oxidase assembly protein COX20, mitochondrial	COX20_MOUSE	-inf	1.22578e-07	3.34335e-06	1.97091e-05
Q6NS52	Dgkb	Diacylglycerol kinase beta	DGKB_MOUSE	-inf	1.22838e-07	3.34335e-06	0.000153909
P32020	Scp2	Non-specific lipid-transfer protein	NLTP_MOUSE	-inf	1.24412e-07	3.34335e-06	7.05271e-05
Q8K4F5	Abhd11	Protein ABHD11	ABHDB_MOUSE	-inf	1.24555e-07	3.34335e-06	1.33078e-05
Q61941	Nnt	NAD(P) transhydrogenase, mitochondrial	NNTM_MOUSE	-inf	1.24731e-07	3.34335e-06	5.60562e-05
O08739	Ampd3	AMP deaminase 3	AMPD3_MOUSE	-inf	1.25002e-07	3.34335e-06	1.76438e-05
Q8K1L5	Ppp1r11	E3 ubiquitin-protein ligase PPP1R11	PP1RB_MOUSE	-inf	1.26058e-07	3.35242e-06	1.34928e-05
Q9Z1J3	Nfs1	Cysteine desulfurase, mitochondrial	NFS1_MOUSE	-inf	1.26517e-07	3.35242e-06	5.5419e-05
Q00558	F8a1	40-kDa huntingtin-associated protein	HAP40_MOUSE	-inf	1.28659e-07	3.36608e-06	1.5742e-05
O35943	Fxn	Frataxin, mitochondrial	FRDA_MOUSE	-inf	1.2941e-07	3.36608e-06	1.42642e-05
P70670	Naca	Nascent polypeptide-associated complex subunit alpha, muscle-specific form,Nascent polypeptide-associated complex subunit alpha	NACAM_MOUSE	-4.02274	1.30184e-07	3.36608e-06	7.05705e-05
O54829	Rgs7	Regulator of G-protein signaling 7	RGS7_MOUSE	2.55591	1.30198e-07	3.36608e-06	0.000447856
O54946	Dnajb6	DnaJ homolog subfamily B member 6	DNJB6_MOUSE	-inf	1.30794e-07	3.36608e-06	3.72733e-05
P62315	Snrpd1	Small nuclear ribonucleoprotein Sm D1	SMD1_MOUSE	-inf	1.31002e-07	3.36608e-06	1.87665e-05
Q3URD3	Slmap	Sarcolemmal membrane-associated protein	SLMAP_MOUSE	-inf	1.32043e-07	3.36608e-06	1.98923e-05
Q99KW9	Itfg1	T-cell immunomodulatory protein	TIP_MOUSE	-inf	1.33819e-07	3.36608e-06	2.01319e-05
Q80VL1	Tdrkh	Tudor and KH domain-containing protein	TDRKH_MOUSE	-inf	1.33896e-07	3.36608e-06	1.4876e-05
Q80ZW2	Them6	Protein THEM6	THEM6_MOUSE	-inf	1.34065e-07	3.36608e-06	3.01191e-05
Q9WUQ2	Preb	Prolactin regulatory element-binding protein	PREB_MOUSE	-inf	1.3502e-07	3.36608e-06	1.52041e-05
Q80Y14	Glrx5	Glutaredoxin-related protein 5, mitochondrial	GLRX5_MOUSE	-inf	1.36248e-07	3.36608e-06	4.47587e-05
Q9DBC0	Selenoo	Protein adenylyltransferase SelO, mitochondrial	SELO_MOUSE	-inf	1.37051e-07	3.36608e-06	8.48011e-06
Q6ZPR4	Kcnt1	Potassium channel subfamily T member 1	KCNT1_MOUSE	-inf	1.37065e-07	3.36608e-06	4.46944e-06
P35285	Rab22a	Ras-related protein Rab-22A	RB22A_MOUSE	-inf	1.37141e-07	3.36608e-06	3.09695e-05
Q9CR61	Ndufb7	NADH dehydrogenase [ubiquinone] 1 beta subcomplex subunit 7	NDUB7_MOUSE	-inf	1.37202e-07	3.36608e-06	0.000219904
P29595	Nedd8	NEDD8	NEDD8_MOUSE	-inf	1.38046e-07	3.36608e-06	0.000114073
P55264	Adk	Adenosine kinase	ADK_MOUSE	-inf	1.38434e-07	3.36608e-06	8.99541e-05
Q9D7P6	Iscu	Iron-sulfur cluster assembly enzyme ISCU, mitochondrial	ISCU_MOUSE	-inf	1.38894e-07	3.36608e-06	4.11458e-05
Q9CQR2	Rps21	40S ribosomal protein S21	RS21_MOUSE	-inf	1.392e-07	3.36608e-06	0.000113121
Q3TMH2	Scrn3	Secernin-3	SCRN3_MOUSE	3.72331	1.39441e-07	3.36608e-06	0.000416335
Q8BH27	Megf9	Multiple epidermal growth factor-like domains protein 9	MEGF9_MOUSE	-inf	1.41993e-07	3.3761e-06	7.35481e-06
Q9CZX8	Rps19	40S ribosomal protein S19	RS19_MOUSE	-inf	1.42358e-07	3.3761e-06	0.000155969
P14131	Rps16	40S ribosomal protein S16	RS16_MOUSE	-1.74451	1.42861e-07	3.3761e-06	0.000136492
P70335	Rock1	Rho-associated protein kinase 1	ROCK1_MOUSE	-inf	1.43903e-07	3.3761e-06	5.40776e-05
Q99M87	Dnaja3	DnaJ homolog subfamily A member 3, mitochondrial	DNJA3_MOUSE	-inf	1.44312e-07	3.3761e-06	5.08086e-05
P39447	Tjp1	Tight junction protein ZO-1	ZO1_MOUSE	-inf	1.44713e-07	3.3761e-06	2.33786e-05
Q9CXS4	Cenpv	Centromere protein V	CENPV_MOUSE	-inf	1.45321e-07	3.3761e-06	7.22175e-05
Q91WT9	Cbs	Cystathionine beta-synthase	CBS_MOUSE	-inf	1.46022e-07	3.3761e-06	9.17264e-06
Q3UHG7	Dennd11	DENN domain-containing protein 11	DEN11_MOUSE	-inf	1.47399e-07	3.3761e-06	5.93451e-06
P97352	S100a13	Protein S100-A13	S10AD_MOUSE	-inf	1.47507e-07	3.3761e-06	6.34637e-05
Q3UHB1	Nt5dc3	5'-nucleotidase domain-containing protein 3	NT5D3_MOUSE	-inf	1.48801e-07	3.3761e-06	3.90814e-05
Q2YRU7	recA	Protein RecA	RECA_BRUA2	-inf	1.49526e-07	3.3761e-06	0.00017858
Q8BL97	Srsf7	Serine/arginine-rich splicing factor 7	SRSF7_MOUSE	-inf	1.49693e-07	3.3761e-06	8.86161e-05
Q922Q4	Pycr2	Pyrroline-5-carboxylate reductase 2	P5CR2_MOUSE	-inf	1.51169e-07	3.3761e-06	3.14998e-05
Q5SUC9	Sco1	Protein SCO1 homolog, mitochondrial	SCO1_MOUSE	-inf	1.52518e-07	3.3761e-06	1.46353e-05
O08600	Endog	Endonuclease G, mitochondrial	NUCG_MOUSE	-inf	1.52622e-07	3.3761e-06	1.32967e-05
Q9CZL5	Pcbd2	Pterin-4-alpha-carbinolamine dehydratase 2	PHS2_MOUSE	-inf	1.52625e-07	3.3761e-06	1.65326e-05
Q9WTP7	Ak3	GTP:AMP phosphotransferase AK3, mitochondrial	KAD3_MOUSE	-inf	1.53564e-07	3.3761e-06	8.33231e-05
Q9D8S4	Rexo2	Oligoribonuclease, mitochondrial	ORN_MOUSE	-inf	1.53764e-07	3.3761e-06	4.32701e-05
Q67BT3	Slc13a5	Solute carrier family 13 member 5	S13A5_MOUSE	-inf	1.53874e-07	3.3761e-06	1.08963e-05
Q5DTY9	Kctd16	BTB/POZ domain-containing protein KCTD16	KCD16_MOUSE	-inf	1.53964e-07	3.3761e-06	7.16784e-05
Q9CS42	Prps2	Ribose-phosphate pyrophosphokinase 2	PRPS2_MOUSE	-inf	1.54619e-07	3.3761e-06	0.000116005
Q91W43	Gldc	Glycine dehydrogenase (decarboxylating), mitochondrial	GCSP_MOUSE	-inf	1.55268e-07	3.3761e-06	6.81929e-06
D3YVE8	Slc35g2	Solute carrier family 35 member G2	S35G2_MOUSE	3.58298	1.5532e-07	3.3761e-06	4.8229e-05
P62317	Snrpd2	Small nuclear ribonucleoprotein Sm D2	SMD2_MOUSE	-inf	1.5598e-07	3.3761e-06	4.78172e-05
Q3UZP4	Svip	Small VCP/p97-interacting protein	SVIP_MOUSE	-inf	1.56003e-07	3.3761e-06	5.2434e-05
P47740	Aldh3a2	Aldehyde dehydrogenase family 3 member A2	AL3A2_MOUSE	-inf	1.56041e-07	3.3761e-06	3.0285e-05
Q8VC42	Rmc1	Regulator of MON1-CCZ1 complex	RMC1_MOUSE	-inf	1.56449e-07	3.3761e-06	4.86753e-06
Q9ERA0	Tfcp2	Alpha-globin transcription factor CP2	TFCP2_MOUSE	-inf	1.57645e-07	3.38269e-06	4.80978e-06
P84075	Hpca;HPCA	Neuron-specific calcium-binding protein hippocalcin	HPCA_MOUSE;HPCA_HUMAN	-3.55786	1.57942e-07	3.38269e-06	0.00106115
Q91XD6	Vps36	Vacuolar protein-sorting-associated protein 36	VPS36_MOUSE	-inf	1.59205e-07	3.39697e-06	7.23373e-06
Q9D9V3	Echdc1	Ethylmalonyl-CoA decarboxylase	ECHD1_MOUSE	-inf	1.59988e-07	3.40069e-06	2.71984e-05
Q9CPZ8	Cmc1	COX assembly mitochondrial protein homolog	COXM1_MOUSE	-inf	1.60573e-07	3.40069e-06	1.42401e-05
P42208	Septin2	Septin-2	SEPT2_MOUSE	-inf	1.62172e-07	3.42182e-06	4.3228e-05
Q3V3R1	Mthfd1l	Monofunctional C1-tetrahydrofolate synthase, mitochondrial	C1TM_MOUSE	-inf	1.66073e-07	3.48072e-06	3.88121e-05
O70250	Pgam2	Phosphoglycerate mutase 2	PGAM2_MOUSE	-inf	1.66185e-07	3.48072e-06	0.000723449
Q8BFR5	Tufm	Elongation factor Tu, mitochondrial	EFTU_MOUSE	-3.24334	1.69157e-07	3.52999e-06	0.000293281
Q8K2Q7	Brox	BRO1 domain-containing protein BROX	BROX_MOUSE	-inf	1.72067e-07	3.54165e-06	1.7635e-05
A6X919	Dpy19l1	Probable C-mannosyltransferase DPY19L1	D19L1_MOUSE	-inf	1.7231e-07	3.54165e-06	4.28964e-06
P18572	Bsg	Basigin	BASI_MOUSE	-inf	1.7307e-07	3.54165e-06	0.000135404
Q9ET30	Tm9sf3	Transmembrane 9 superfamily member 3	TM9S3_MOUSE	-inf	1.73233e-07	3.54165e-06	2.20046e-05
Q9CQ85	Timm22	Mitochondrial import inner membrane translocase subunit Tim22	TIM22_MOUSE	-inf	1.74229e-07	3.54165e-06	4.43408e-05
P38060	Hmgcl	Hydroxymethylglutaryl-CoA lyase, mitochondrial	HMGCL_MOUSE	-inf	1.74667e-07	3.54165e-06	6.09385e-05
Q9QZC2	Plxnc1	Plexin-C1	PLXC1_MOUSE	-inf	1.74971e-07	3.54165e-06	4.74965e-05
Q8R4N0	Clybl	Citramalyl-CoA lyase, mitochondrial	CLYBL_MOUSE	-inf	1.75075e-07	3.54165e-06	4.38487e-05
Q5M8N4	Sdr39u1	Epimerase family protein SDR39U1	D39U1_MOUSE	-inf	1.75311e-07	3.54165e-06	3.51566e-05
Q8CH18	Ccar1	Cell division cycle and apoptosis regulator protein 1	CCAR1_MOUSE	-inf	1.7741e-07	3.56879e-06	1.42507e-05
Q8BXJ9	Tmem62	Transmembrane protein 62	TMM62_MOUSE	-inf	1.78128e-07	3.56879e-06	3.10687e-06
P83887	Tubg1	Tubulin gamma-1 chain	TBG1_MOUSE	-inf	1.79028e-07	3.56879e-06	2.41776e-05
P57776	Eef1d	Elongation factor 1-delta	EF1D_MOUSE	-2.91473	1.80772e-07	3.56879e-06	0.000238046
O35417	Pdyn	Proenkephalin-B	PDYN_MOUSE	-inf	1.8092e-07	3.56879e-06	1.86043e-05
Q91Z67	Srgap2	SLIT-ROBO Rho GTPase-activating protein 2	SRGP2_MOUSE	-inf	1.8239e-07	3.56879e-06	2.44959e-05
Q9CZ42	Naxd	ATP-dependent (S)-NAD(P)H-hydrate dehydratase	NNRD_MOUSE	-inf	1.8262e-07	3.56879e-06	9.11109e-05
Q9JM14	Nt5c	5'(3')-deoxyribonucleotidase, cytosolic type	NT5C_MOUSE	-inf	1.83012e-07	3.56879e-06	8.45992e-05
Q91WL8	Wwox	WW domain-containing oxidoreductase	WWOX_MOUSE	-inf	1.83665e-07	3.56879e-06	1.01183e-05
Q921Q7	Rin1	Ras and Rab interactor 1	RIN1_MOUSE	-inf	1.84403e-07	3.56879e-06	2.15023e-05
Q8JZW4	Cpne5	Copine-5	CPNE5_MOUSE	-inf	1.85e-07	3.56879e-06	0.000129467
P48428	Tbca	Tubulin-specific chaperone A	TBCA_MOUSE	-inf	1.85781e-07	3.56879e-06	5.18466e-05
Q3U2P1	Sec24a	Protein transport protein Sec24A	SC24A_MOUSE	5.3989	1.85847e-07	3.56879e-06	5.67829e-05
Q9D1M0	Sec13	Protein SEC13 homolog	SEC13_MOUSE	-inf	1.85955e-07	3.56879e-06	3.32375e-05
Q9CY16	Mrps28	28S ribosomal protein S28, mitochondrial	RT28_MOUSE	-inf	1.86051e-07	3.56879e-06	1.54223e-05
Q8K298	Anln	Anillin	ANLN_MOUSE	-inf	1.88785e-07	3.58631e-06	4.67054e-05
P97447	Fhl1	Four and a half LIM domains protein 1	FHL1_MOUSE	2.94827	1.89565e-07	3.58631e-06	0.000245142
P42337	Pik3ca	Phosphatidylinositol 4,5-bisphosphate 3-kinase catalytic subunit alpha isoform	PK3CA_MOUSE	-inf	1.89621e-07	3.58631e-06	2.77353e-06
Q9CPX7	Mrps16	28S ribosomal protein S16, mitochondrial	RT16_MOUSE	-inf	1.92417e-07	3.58631e-06	1.20291e-05
Q8BMK4	Ckap4	Cytoskeleton-associated protein 4	CKAP4_MOUSE	5.42343	1.92602e-07	3.58631e-06	0.000360669
Q9JKB3	Ybx3	Y-box-binding protein 3	YBOX3_MOUSE	-inf	1.92682e-07	3.58631e-06	2.04776e-06
Q69ZK9	Nlgn2	Neuroligin-2	NLGN2_MOUSE	-inf	1.92862e-07	3.58631e-06	5.12756e-05
Q8CI43	Myl6b	Myosin light chain 6B	MYL6B_MOUSE	-inf	1.93357e-07	3.58631e-06	0.000109729
Q8R0F8	Fahd1	Acylpyruvase FAHD1, mitochondrial	FAHD1_MOUSE	-inf	1.9401e-07	3.58631e-06	4.49733e-05
P99028	Uqcrh	Cytochrome b-c1 complex subunit 6, mitochondrial	QCR6_MOUSE	-inf	1.94603e-07	3.58631e-06	0.000395045
Q99KF1	Tmed9	Transmembrane emp24 domain-containing protein 9	TMED9_MOUSE	-inf	1.94681e-07	3.58631e-06	1.70061e-05
O70480	Vamp4	Vesicle-associated membrane protein 4	VAMP4_MOUSE	-inf	1.95219e-07	3.58631e-06	1.11875e-05
Q9WTM5	Ruvbl2	RuvB-like 2	RUVB2_MOUSE	-inf	1.95494e-07	3.58631e-06	2.63052e-05
Q9DD18	Dtd1	D-aminoacyl-tRNA deacylase 1	DTD1_MOUSE	-2.36439	1.95777e-07	3.58631e-06	8.708e-05
Q8C031	Lrrc4c	Leucine-rich repeat-containing protein 4C	LRC4C_MOUSE	-inf	1.97019e-07	3.59667e-06	8.90839e-06
Q8VHQ9	Acot11	Acyl-coenzyme A thioesterase 11	ACO11_MOUSE	-inf	1.97605e-07	3.59667e-06	2.67842e-05
Q5XPI3	Rnf123	E3 ubiquitin-protein ligase RNF123	RN123_MOUSE	-inf	2.00621e-07	3.60378e-06	8.83914e-06
Q6ZWY3	Rps27l	40S ribosomal protein S27-like	RS27L_MOUSE	-inf	2.01084e-07	3.60378e-06	6.07809e-05
Q8CJF9	Ago3	Protein argonaute-3	AGO3_MOUSE	-inf	2.01637e-07	3.60378e-06	1.4368e-05
Q9CY64	Blvra	Biliverdin reductase A	BIEA_MOUSE	-inf	2.02631e-07	3.60378e-06	4.41031e-05
P97429	Anxa4	Annexin A4	ANXA4_MOUSE	-inf	2.0324e-07	3.60378e-06	2.73049e-06
P18760	Cfl1	Cofilin-1	COF1_MOUSE	-2.32662	2.03441e-07	3.60378e-06	0.00216564
O55142	Rpl35a	60S ribosomal protein L35a	RL35A_MOUSE	-inf	2.03636e-07	3.60378e-06	6.23109e-05
Q99N94	Mrpl9	39S ribosomal protein L9, mitochondrial	RM09_MOUSE	-inf	2.05171e-07	3.60378e-06	2.15468e-05
Q8K215	Lyrm4	LYR motif-containing protein 4	LYRM4_MOUSE	-inf	2.06131e-07	3.60378e-06	4.29587e-05
Q3UX43	Ankrd13c	Ankyrin repeat domain-containing protein 13C	AN13C_MOUSE	-inf	2.06851e-07	3.60378e-06	3.03827e-05
P05202	Got2	Aspartate aminotransferase, mitochondrial	AATM_MOUSE	-2.48848	2.07581e-07	3.60378e-06	0.00208215
Q93092	Taldo1	Transaldolase	TALDO_MOUSE	-4.14672	2.0762e-07	3.60378e-06	0.000171006
Q9Z2I8	Suclg2	Succinate--CoA ligase [GDP-forming] subunit beta, mitochondrial	SUCB2_MOUSE	-inf	2.08327e-07	3.60378e-06	3.07526e-05
Q8BH43	Wasf2	Wiskott-Aldrich syndrome protein family member 2	WASF2_MOUSE	-inf	2.08664e-07	3.60378e-06	1.05339e-05
Q3U0D9	Hace1	E3 ubiquitin-protein ligase HACE1	HACE1_MOUSE	-inf	2.08996e-07	3.60378e-06	8.42515e-06
P15327	Bpgm	Bisphosphoglycerate mutase	PMGE_MOUSE	-inf	2.09089e-07	3.60378e-06	1.62499e-05
Q9ERL9	Gucy1a1	Guanylate cyclase soluble subunit alpha-1	GCYA1_MOUSE	-inf	2.09942e-07	3.60378e-06	3.91329e-05
P17563	Selenbp1	Methanethiol oxidase	SBP1_MOUSE	-inf	2.10462e-07	3.60378e-06	3.47219e-05
Q9WTR5	Cdh13	Cadherin-13	CAD13_MOUSE	-inf	2.11259e-07	3.60378e-06	7.52086e-05
Q9CQN1	Trap1	Heat shock protein 75 kDa, mitochondrial	TRAP1_MOUSE	-inf	2.12685e-07	3.60378e-06	4.6555e-05
P29416	Hexa	Beta-hexosaminidase subunit alpha	HEXA_MOUSE	-inf	2.12994e-07	3.60378e-06	1.53241e-05
P49813	Tmod1	Tropomodulin-1	TMOD1_MOUSE	-inf	2.13462e-07	3.60378e-06	8.18468e-05
Q9D0Q7	Mrpl45	39S ribosomal protein L45, mitochondrial	RM45_MOUSE	-inf	2.13484e-07	3.60378e-06	1.35501e-05
P51174	Acadl	Long-chain specific acyl-CoA dehydrogenase, mitochondrial	ACADL_MOUSE	-inf	2.13936e-07	3.60378e-06	5.82863e-05
Q9JIQ3	Diablo	Diablo homolog, mitochondrial	DBLOH_MOUSE	-inf	2.14766e-07	3.60378e-06	5.96415e-06
Q6NVF9	Cpsf6	Cleavage and polyadenylation specificity factor subunit 6	CPSF6_MOUSE	-inf	2.15093e-07	3.60378e-06	4.36301e-05
Q8R3L5	Slco3a1	Solute carrier organic anion transporter family member 3A1	SO3A1_MOUSE	-inf	2.15192e-07	3.60378e-06	3.35694e-06
Q6ZWY9	H2bc4;H2BC4;Hist1h2bb;HIST1H2BD;Hist1h2bf;Hist1h2bh;HIST1H2BH;Hist1h2bk;HIST1H2BK;HIST1H2BL;Hist1h2bm;HIST1H2BM;HIST1H2BN;Hist1h2bp;Hist2h2bb	Histone H2B type 1-C/E/G;Histone H2B type 1-C/E/F/G/I;Histone H2B type 1-B;Histone H2B type 1-D;Histone H2B type 1-F/J/L;Histone H2B type 1-H;Histone H2B type 1-H;Histone H2B type 1-K;Histone H2B type 1-K;Histone H2B type 1-L;Histone H2B type 1-M;Histone H2B type 1-M;Histone H2B type 1-N;Histone H2B type 1-P;Histone H2B type 2-B	H2B1C_MOUSE;H2B1C_HUMAN;H2B1B_MOUSE;H2B1D_HUMAN;H2B1F_MOUSE;H2B1H_MOUSE;H2B1H_HUMAN;H2B1K_MOUSE;H2B1K_HUMAN;H2B1L_HUMAN;H2B1M_MOUSE;H2B1M_HUMAN;H2B1N_HUMAN;H2B1P_MOUSE;H2B2B_MOUSE	-inf	2.15976e-07	3.60378e-06	0.00215673
Q9WTZ1	Rnf7	RING-box protein 2	RBX2_MOUSE	-inf	2.16899e-07	3.60378e-06	1.14102e-05
P62631	Eef1a2	Elongation factor 1-alpha 2	EF1A2_MOUSE	-2.89801	2.16973e-07	3.60378e-06	0.0011063
Q9CXY6	Ilf2	Interleukin enhancer-binding factor 2	ILF2_MOUSE	-inf	2.18717e-07	3.62218e-06	4.29005e-05
Q9JMF3	Gng13	Guanine nucleotide-binding protein G(I)/G(S)/G(O) subunit gamma-13	GBG13_MOUSE	-inf	2.19472e-07	3.62414e-06	4.48486e-05
Q9D5R2	Wdr20	WD repeat-containing protein 20	WDR20_MOUSE	-inf	2.20938e-07	3.63781e-06	3.07539e-06
Q9D0R2	Tars1	Threonine--tRNA ligase 1, cytoplasmic	SYTC_MOUSE	-inf	2.23517e-07	3.66967e-06	3.1382e-05
Q99J99	Mpst	3-mercaptopyruvate sulfurtransferase	THTM_MOUSE	-inf	2.25884e-07	3.69177e-06	2.90633e-05
Q8QZS1	Hibch	3-hydroxyisobutyryl-CoA hydrolase, mitochondrial	HIBCH_MOUSE	-inf	2.26319e-07	3.69177e-06	7.07586e-05
Q9DBS5	Klc4	Kinesin light chain 4	KLC4_MOUSE	-inf	2.26807e-07	3.69177e-06	3.36213e-05
Q9CQB5	Cisd2	CDGSH iron-sulfur domain-containing protein 2	CISD2_MOUSE	-inf	2.28724e-07	3.71236e-06	3.21352e-05
Q6ZQ82	Arhgap26	Rho GTPase-activating protein 26	RHG26_MOUSE	-inf	2.30452e-07	3.72978e-06	1.49771e-05
P10126	Eef1a1	Elongation factor 1-alpha 1	EF1A1_MOUSE	2.63966	2.33054e-07	3.76121e-06	0.000805942
Q9DBG9	Tax1bp3	Tax1-binding protein 3	TX1B3_MOUSE	-inf	2.37127e-07	3.81613e-06	2.96983e-06
P26516	Psmd7	26S proteasome non-ATPase regulatory subunit 7	PSMD7_MOUSE	-inf	2.38551e-07	3.82824e-06	3.73272e-05
Q9WUR2	Eci2	Enoyl-CoA delta isomerase 2, mitochondrial	ECI2_MOUSE	-inf	2.40675e-07	3.8386e-06	3.56409e-05
P47802	Mtx1	Metaxin-1	MTX1_MOUSE	-2.87503	2.41179e-07	3.8386e-06	0.000106292
Q9WU40	Lemd3	Inner nuclear membrane protein Man1	MAN1_MOUSE	-inf	2.41218e-07	3.8386e-06	3.351e-06
P43406	Itgav	Integrin alpha-V	ITAV_MOUSE	-inf	2.43768e-07	3.86838e-06	1.32966e-05
Q9Z239	Fxyd1	Phospholemman	PLM_MOUSE	-inf	2.46745e-07	3.9e-06	5.03877e-05
Q9Z2W8	Gria4	Glutamate receptor 4	GRIA4_MOUSE	-inf	2.4713e-07	3.9e-06	6.62372e-06
Q8BH95	Echs1	Enoyl-CoA hydratase, mitochondrial	ECHM_MOUSE	-inf	2.48456e-07	3.91009e-06	0.000175568
Q91YJ5	Mtif2	Translation initiation factor IF-2, mitochondrial	IF2M_MOUSE	-inf	2.50975e-07	3.92629e-06	6.69645e-06
Q8R5A3	Apbb1ip	Amyloid beta A4 precursor protein-binding family B member 1-interacting protein	AB1IP_MOUSE	-inf	2.51266e-07	3.92629e-06	9.16781e-06
P35288	Rab23	Ras-related protein Rab-23	RAB23_MOUSE	-inf	2.51553e-07	3.92629e-06	2.8895e-05
O88532	Zfr	Zinc finger RNA-binding protein	ZFR_MOUSE	-inf	2.55435e-07	3.976e-06	1.4146e-05
Q6PAK3	Prmt8	Protein arginine N-methyltransferase 8	ANM8_MOUSE	-inf	2.5639e-07	3.97999e-06	3.38235e-05
Q8BP40	Acp6	Lysophosphatidic acid phosphatase type 6	PPA6_MOUSE	-inf	2.57656e-07	3.98876e-06	1.1031e-05
Q9R0U0	Srsf10	Serine/arginine-rich splicing factor 10	SRS10_MOUSE	-inf	2.61228e-07	4.03311e-06	1.63754e-05
P84078	Arf1;Arf3	ADP-ribosylation factor 1;ADP-ribosylation factor 3	ARF1_MOUSE;ARF3_MOUSE	-inf	2.63943e-07	4.06401e-06	0.000722911
Q8CHT0	Aldh4a1	Delta-1-pyrroline-5-carboxylate dehydrogenase, mitochondrial	AL4A1_MOUSE	-inf	2.6643e-07	4.08448e-06	6.36965e-05
C0HKG5	Rnaset2a;Rnaset2b	Ribonuclease T2-A;Ribonuclease T2-B	RNT2A_MOUSE;RNT2B_MOUSE	-inf	2.66707e-07	4.08448e-06	2.62514e-06
Q9QXV0	Pcsk1n	ProSAAS	PCSK1_MOUSE	-inf	2.7084e-07	4.12471e-06	0.000299708
Q9JMC3	Dnaja4	DnaJ homolog subfamily A member 4	DNJA4_MOUSE	-inf	2.71146e-07	4.12471e-06	1.72976e-05
Q80XG9	Lrrtm4	Leucine-rich repeat transmembrane neuronal protein 4	LRRT4_MOUSE	-inf	2.71813e-07	4.12471e-06	4.26813e-06
Q9WV85	Nme3	Nucleoside diphosphate kinase 3	NDK3_MOUSE	-inf	2.7223e-07	4.12471e-06	2.05895e-05
Q8BYH7	Tbc1d17	TBC1 domain family member 17	TBC17_MOUSE	-inf	2.73353e-07	4.13075e-06	2.15434e-05
Q9EQK5	Mvp	Major vault protein	MVP_MOUSE	-inf	2.76456e-07	4.16412e-06	5.30095e-05
P62627	Dynlrb1	Dynein light chain roadblock-type 1	DLRB1_MOUSE	-inf	2.77023e-07	4.16412e-06	9.84329e-05
B7ZMP1	Xpnpep3	Xaa-Pro aminopeptidase 3	XPP3_MOUSE	-inf	2.80618e-07	4.20288e-06	8.54634e-06
P09671	Sod2	Superoxide dismutase [Mn], mitochondrial	SODM_MOUSE	-2.33694	2.81078e-07	4.20288e-06	0.000421357
Q9D7N3	Mrps9	28S ribosomal protein S9, mitochondrial	RT09_MOUSE	-inf	2.85133e-07	4.25236e-06	8.91544e-06
Q3TFD2	Lpcat1	Lysophosphatidylcholine acyltransferase 1	PCAT1_MOUSE	2.77118	2.87131e-07	4.25452e-06	3.80293e-05
Q3U5Q7	Cmpk2	UMP-CMP kinase 2, mitochondrial	CMPK2_MOUSE	-inf	2.87345e-07	4.25452e-06	3.59075e-05
Q8K389	Cdk5rap2	CDK5 regulatory subunit-associated protein 2	CK5P2_MOUSE	-inf	2.87518e-07	4.25452e-06	0.000145031
P57784	Snrpa1	U2 small nuclear ribonucleoprotein A'	RU2A_MOUSE	-inf	2.89469e-07	4.27229e-06	1.86868e-05
Q8CGK3	Lonp1	Lon protease homolog, mitochondrial	LONM_MOUSE	-2.32564	2.91772e-07	4.28484e-06	8.67839e-05
P18652	RPS6KA	Ribosomal protein S6 kinase 2 alpha	KS6AA_CHICK	-inf	2.91823e-07	4.28484e-06	2.14833e-05
Q9DCB8	Isca2	Iron-sulfur cluster assembly 2 homolog, mitochondrial	ISCA2_MOUSE	-inf	2.93722e-07	4.30163e-06	3.43495e-05
O88745	Scrg1	Scrapie-responsive protein 1	SCRG1_MOUSE	-inf	2.95956e-07	4.31083e-06	1.70556e-05
Q9D0J4	Arl2	ADP-ribosylation factor-like protein 2	ARL2_MOUSE	-inf	2.96575e-07	4.31083e-06	9.37633e-06
Q8QZT2	Ccsap	Centriole, cilia and spindle-associated protein	CCSAP_MOUSE	-inf	2.96862e-07	4.31083e-06	5.8676e-05
Q8K3Z9	Pom121	Nuclear envelope pore membrane protein POM 121	PO121_MOUSE	-inf	2.97377e-07	4.31083e-06	1.16818e-06
Q9CQ40	Mrpl49	39S ribosomal protein L49, mitochondrial	RM49_MOUSE	-inf	3.0046e-07	4.34081e-06	9.29671e-06
P62823	Rab3c	Ras-related protein Rab-3C	RAB3C_MOUSE	1.46275	3.00969e-07	4.34081e-06	0.000663969
Q80YT7	Pde4dip	Myomegalin	MYOME_MOUSE	-inf	3.02873e-07	4.35034e-06	1.69605e-05
Q7TNR6	Igsf21	Immunoglobulin superfamily member 21	IGS21_MOUSE	-inf	3.03739e-07	4.35034e-06	1.95737e-05
O55128	Sap18	Histone deacetylase complex subunit SAP18	SAP18_MOUSE	-inf	3.04426e-07	4.35034e-06	3.29278e-05
P60867	Rps20	40S ribosomal protein S20	RS20_MOUSE	-inf	3.04712e-07	4.35034e-06	8.21606e-05
Q6ZQK5	Acap2	Arf-GAP with coiled-coil, ANK repeat and PH domain-containing protein 2	ACAP2_MOUSE	-inf	3.05447e-07	4.35034e-06	1.88031e-05
Q9CQ26	Stambp	STAM-binding protein	STABP_MOUSE	-inf	3.06421e-07	4.35332e-06	3.26121e-06
Q8BH55	Thnsl1	Threonine synthase-like 1	THNS1_MOUSE	-inf	3.09589e-07	4.38738e-06	3.55371e-05
Q7TNC4	Luc7l2	Putative RNA-binding protein Luc7-like 2	LC7L2_MOUSE	-inf	3.11909e-07	4.40929e-06	1.36612e-05
Q99N87	Mrps5	28S ribosomal protein S5, mitochondrial	RT05_MOUSE	-inf	3.12808e-07	4.41071e-06	1.01297e-05
Q62421	Sh3gl3	Endophilin-A3	SH3G3_MOUSE	-inf	3.13558e-07	4.41071e-06	5.72783e-05
Q99LY9	Ndufs5	NADH dehydrogenase [ubiquinone] iron-sulfur protein 5	NDUS5_MOUSE	-inf	3.20664e-07	4.49957e-06	0.000216418
Q6P4T2	Snrnp200	U5 small nuclear ribonucleoprotein 200 kDa helicase	U520_MOUSE	-inf	3.2212e-07	4.50888e-06	1.79697e-05
P97742	Cpt1a	Carnitine O-palmitoyltransferase 1, liver isoform	CPT1A_MOUSE	-inf	3.23897e-07	4.51965e-06	1.15025e-05
O88322	Nid2	Nidogen-2	NID2_MOUSE	-inf	3.24476e-07	4.51965e-06	1.09429e-05
Q8CHT1	Ngef	Ephexin-1	NGEF_MOUSE	-3.48814	3.26346e-07	4.53201e-06	0.000138984
Q9DBB8	Dhdh	Trans-1,2-dihydrobenzene-1,2-diol dehydrogenase	DHDH_MOUSE	-inf	3.27047e-07	4.53201e-06	1.64911e-05
Q62245	Sos1	Son of sevenless homolog 1	SOS1_MOUSE	-inf	3.2775e-07	4.53201e-06	2.38045e-05
Q8VE97	Srsf4	Serine/arginine-rich splicing factor 4	SRSF4_MOUSE	-inf	3.29488e-07	4.53473e-06	5.86408e-05
P28798	Grn	Progranulin	GRN_MOUSE	-inf	3.29538e-07	4.53473e-06	3.66526e-05
Q9D0G0	Mrps30	28S ribosomal protein S30, mitochondrial	RT30_MOUSE	-inf	3.31164e-07	4.54612e-06	9.65326e-06
O70378	Emc8	ER membrane protein complex subunit 8	EMC8_MOUSE	-inf	3.33844e-07	4.5719e-06	1.57991e-05
Q52KR3	Prune2	Protein prune homolog 2	PRUN2_MOUSE	2.25595	3.35488e-07	4.58339e-06	8.62831e-05
P52623	Uck1	Uridine-cytidine kinase 1	UCK1_MOUSE	-inf	3.38121e-07	4.60831e-06	9.26111e-06
A2AIL4	Ndufaf6	NADH dehydrogenase (ubiquinone) complex I, assembly factor 6	NDUF6_MOUSE	-inf	3.40672e-07	4.62167e-06	5.89218e-06
Q9WV98	Timm9	Mitochondrial import inner membrane translocase subunit Tim9	TIM9_MOUSE	-inf	3.40723e-07	4.62167e-06	0.000206147
Q921M3	Sf3b3	Splicing factor 3B subunit 3	SF3B3_MOUSE	-inf	3.42266e-07	4.62783e-06	1.70871e-05
Q9EP89	Lactb	Serine beta-lactamase-like protein LACTB, mitochondrial	LACTB_MOUSE	-inf	3.42802e-07	4.62783e-06	4.29107e-05
P62983	Rps27a	Ubiquitin-40S ribosomal protein S27a	RS27A_MOUSE	-inf	3.44702e-07	4.62901e-06	0.00134666
Q9D2R6	Coa3	Cytochrome c oxidase assembly factor 3 homolog, mitochondrial	COA3_MOUSE	-inf	3.45476e-07	4.62901e-06	4.36435e-05
Q810B6	Ankfy1	Rabankyrin-5	ANFY1_MOUSE	-inf	3.45683e-07	4.62901e-06	1.17893e-05
Q8BWQ6	Vps35l	VPS35 endosomal protein sorting factor-like	VP35L_MOUSE	-inf	3.46139e-07	4.62901e-06	1.01124e-05
Q8R1F1	Niban2	Protein Niban 2	NIBA2_MOUSE	-inf	3.47006e-07	4.62973e-06	5.84891e-06
Q66L44	Cbarp	Voltage-dependent calcium channel beta subunit-associated regulatory protein	CBARP_MOUSE	4.90364	3.47986e-07	4.63195e-06	0.000668699
Q8K1R3	Pnpt1	Polyribonucleotide nucleotidyltransferase 1, mitochondrial	PNPT1_MOUSE	-inf	3.50784e-07	4.65109e-06	1.48868e-05
Q61161	Map4k2	Mitogen-activated protein kinase kinase kinase kinase 2	M4K2_MOUSE	-inf	3.52634e-07	4.65109e-06	2.09155e-06
Q80W21	Gstm7	Glutathione S-transferase Mu 7	GSTM7_MOUSE	-inf	3.53011e-07	4.65109e-06	0.000306016
Q9QYR9	Acot2	Acyl-coenzyme A thioesterase 2, mitochondrial	ACOT2_MOUSE	-inf	3.53277e-07	4.65109e-06	1.39594e-05
P84104	Srsf3	Serine/arginine-rich splicing factor 3	SRSF3_MOUSE	-4.44693	3.53506e-07	4.65109e-06	0.000200969
O09005	Degs1	Sphingolipid delta(4)-desaturase DES1	DEGS1_MOUSE	-inf	3.55973e-07	4.67276e-06	8.15535e-06
O09172	Gclm	Glutamate--cysteine ligase regulatory subunit	GSH0_MOUSE	-inf	3.58436e-07	4.69428e-06	2.58695e-05
Q8VCN6	Cd99	CD99 antigen	CD99_MOUSE	-inf	3.59778e-07	4.70105e-06	2.51939e-05
Q8BH59	Slc25a12	Calcium-binding mitochondrial carrier protein Aralar1	CMC1_MOUSE	-2.09597	3.61287e-07	4.70997e-06	0.000704054
Q9CXW2	Mrps22	28S ribosomal protein S22, mitochondrial	RT22_MOUSE	-inf	3.62203e-07	4.71111e-06	1.53749e-05
E9Q6P5	Ttc7b	Tetratricopeptide repeat protein 7B	TTC7B_MOUSE	-inf	3.67844e-07	4.7736e-06	4.43194e-05
Q61233	Lcp1	Plastin-2	PLSL_MOUSE	-2.33082	3.71451e-07	4.80583e-06	6.60826e-05
Q6PHS9	Cacna2d2	Voltage-dependent calcium channel subunit alpha-2/delta-2	CA2D2_MOUSE	-inf	3.72745e-07	4.80583e-06	8.47823e-05
Q01730	Rsu1;RSU1	Ras suppressor protein 1	RSU1_MOUSE;RSU1_HUMAN	-inf	3.72859e-07	4.80583e-06	2.25179e-05
Q0P678	Zc3h18	Zinc finger CCCH domain-containing protein 18	ZCH18_MOUSE	-inf	3.77468e-07	4.84177e-06	3.2985e-06
Q9DB25	Alg5	Dolichyl-phosphate beta-glucosyltransferase	ALG5_MOUSE	-inf	3.77752e-07	4.84177e-06	9.7087e-06
P97930	Dtymk	Thymidylate kinase	KTHY_MOUSE	-inf	3.78197e-07	4.84177e-06	1.95191e-05
O88703	Hcn2	Potassium/sodium hyperpolarization-activated cyclic nucleotide-gated channel 2	HCN2_MOUSE	-inf	3.7946e-07	4.84704e-06	3.31815e-05
O08810	Eftud2	116 kDa U5 small nuclear ribonucleoprotein component	U5S1_MOUSE	-inf	3.81618e-07	4.8637e-06	1.78454e-05
Q7TSH2	Phkb	Phosphorylase b kinase regulatory subunit beta	KPBB_MOUSE	-inf	3.83712e-07	4.87564e-06	7.20107e-06
Q8R071	Itpka	Inositol-trisphosphate 3-kinase A	IP3KA_MOUSE	-inf	3.84266e-07	4.87564e-06	4.29901e-05
Q8BMS4	Coq3	Ubiquinone biosynthesis O-methyltransferase, mitochondrial	COQ3_MOUSE	-inf	3.86562e-07	4.88981e-06	1.69376e-05
Q8R1S0	Coq6	Ubiquinone biosynthesis monooxygenase COQ6, mitochondrial	COQ6_MOUSE	-inf	3.87581e-07	4.88981e-06	2.28611e-05
Q8BGD8	Coa6	Cytochrome c oxidase assembly factor 6 homolog	COA6_MOUSE	-inf	3.88167e-07	4.88981e-06	2.63053e-05
Q3TCN2	Plbd2	Putative phospholipase B-like 2	PLBL2_MOUSE	-inf	3.88816e-07	4.88981e-06	1.00661e-05
Q499X9	Mars2	Methionine--tRNA ligase, mitochondrial	SYMM_MOUSE	-inf	3.90123e-07	4.89544e-06	4.7778e-06
Q9DCI9	Mrpl32	39S ribosomal protein L32, mitochondrial	RM32_MOUSE	-inf	3.91672e-07	4.9025e-06	4.9375e-06
Q923D4	Sf3b5	Splicing factor 3B subunit 5	SF3B5_MOUSE	-inf	3.92406e-07	4.9025e-06	1.32003e-05
Q9CZR8	Tsfm	Elongation factor Ts, mitochondrial	EFTS_MOUSE	-inf	3.94988e-07	4.91752e-06	3.34162e-05
Q9D1L0	Chchd2	Coiled-coil-helix-coiled-coil-helix domain-containing protein 2	CHCH2_MOUSE	-inf	3.95335e-07	4.91752e-06	3.4528e-05
Q9CPW2	Fdx2	Ferredoxin-2, mitochondrial	FDX2_MOUSE	-inf	3.99009e-07	4.94246e-06	2.10435e-05
P97467	Pam	Peptidyl-glycine alpha-amidating monooxygenase	AMD_MOUSE	-inf	3.99075e-07	4.94246e-06	2.01899e-05
Q8C4X2	Csnk1g3	Casein kinase I isoform gamma-3	KC1G3_MOUSE	-inf	4.00241e-07	4.94368e-06	1.6877e-05
P68134	Acta1;ACTA1	Actin, alpha skeletal muscle;Actin, alpha skeletal muscle	ACTS_MOUSE;ACTS_RABIT	-inf	4.00909e-07	4.94368e-06	0.000929485
Q99MX0	Tktl1	Transketolase-like protein 1	TKTL1_MOUSE	-inf	4.023e-07	4.95011e-06	0.000103022
Q8VD66	Abhd4	(Lyso)-N-acylphosphatidylethanolamine lipase	ABHD4_MOUSE	-inf	4.0697e-07	4.99678e-06	7.62029e-06
Q641P0	Actr3b	Actin-related protein 3B	ARP3B_MOUSE	-inf	4.11815e-07	5.0454e-06	0.000101706
Q80ZS3	Mrps26	28S ribosomal protein S26, mitochondrial	RT26_MOUSE	-inf	4.14208e-07	5.06383e-06	9.32695e-06
Q9CYN9	Atp6ap2	Renin receptor	RENR_MOUSE	-inf	4.16685e-07	5.08321e-06	5.31882e-05
P56213	Gfer	FAD-linked sulfhydryl oxidase ALR	ALR_MOUSE	-inf	4.25144e-07	5.14388e-06	2.25422e-05
Q9EQC5	Scyl1	N-terminal kinase-like protein	SCYL1_MOUSE	-inf	4.2645e-07	5.14388e-06	1.03758e-05
Q8CAE9	Podxl2	Podocalyxin-like protein 2	PDXL2_MOUSE	-inf	4.26767e-07	5.14388e-06	3.595e-06
P53702	Hccs	Cytochrome c-type heme lyase	CCHL_MOUSE	-inf	4.27266e-07	5.14388e-06	2.06693e-05
Q9CXP8	Gng10	Guanine nucleotide-binding protein G(I)/G(S)/G(O) subunit gamma-10	GBG10_MOUSE	-inf	4.27606e-07	5.14388e-06	4.56512e-05
Q9D0B5	Tstd3	Thiosulfate sulfurtransferase/rhodanese-like domain-containing protein 3	TSTD3_MOUSE	-inf	4.27803e-07	5.14388e-06	1.66767e-05
Q9Z0Y1	Dctn3	Dynactin subunit 3	DCTN3_MOUSE	-inf	4.27979e-07	5.14388e-06	0.000114414
Q8VDK1	Nit1	Deaminated glutathione amidase	NIT1_MOUSE	-inf	4.36182e-07	5.22817e-06	3.84495e-05
Q00915	Rbp1	Retinol-binding protein 1	RET1_MOUSE	-inf	4.36828e-07	5.22817e-06	2.84732e-05
Q8BVU5	Nudt9	ADP-ribose pyrophosphatase, mitochondrial	NUDT9_MOUSE	-inf	4.38491e-07	5.23424e-06	1.08282e-05
Q8BTI9	Pik3cb	Phosphatidylinositol 4,5-bisphosphate 3-kinase catalytic subunit beta isoform	PK3CB_MOUSE	-inf	4.40601e-07	5.23424e-06	3.17143e-06
Q3TIR3	Ric8a	Synembryn-A	RIC8A_MOUSE	-inf	4.40875e-07	5.23424e-06	7.76637e-06
Q8K386	Rab15	Ras-related protein Rab-15	RAB15_MOUSE	-inf	4.4101e-07	5.23424e-06	2.55131e-05
Q8BMJ2	Lars	Leucine--tRNA ligase, cytoplasmic	SYLC_MOUSE	-inf	4.44369e-07	5.26314e-06	2.49697e-05
Q9ET22	Dpp7	Dipeptidyl peptidase 2	DPP2_MOUSE	-inf	4.47275e-07	5.28657e-06	5.00596e-06
Q5U458	Dnajc11	DnaJ homolog subfamily C member 11	DJC11_MOUSE	-inf	4.54467e-07	5.36046e-06	0.000398628
O08989	Mras	Ras-related protein M-Ras	RASM_MOUSE	-inf	4.5602e-07	5.36507e-06	3.54349e-05
Q6Y685	Tacc1	Transforming acidic coiled-coil-containing protein 1	TACC1_MOUSE	-inf	4.57323e-07	5.36507e-06	2.5178e-05
Q8VH51	Rbm39	RNA-binding protein 39	RBM39_MOUSE	-inf	4.58761e-07	5.36507e-06	1.92646e-05
Q8CF66	Lamtor4	Ragulator complex protein LAMTOR4	LTOR4_MOUSE	-inf	4.59049e-07	5.36507e-06	3.73812e-05
P62137	Ppp1ca	Serine/threonine-protein phosphatase PP1-alpha catalytic subunit	PP1A_MOUSE	-1.35941	4.59567e-07	5.36507e-06	0.000211346
D3YZI9	Pgbd5	PiggyBac transposable element-derived protein 5	PGBD5_MOUSE	-inf	4.61496e-07	5.36721e-06	2.35887e-05
Q811Q9	Pcyt1b	Choline-phosphate cytidylyltransferase B	PCY1B_MOUSE	-inf	4.61635e-07	5.36721e-06	7.0892e-06
Q8K2M0	Mrpl38	39S ribosomal protein L38, mitochondrial	RM38_MOUSE	-inf	4.64404e-07	5.38841e-06	8.45685e-06
Q3THW5	H2afv;H2afz	Histone H2A.V;Histone H2A.Z	H2AV_MOUSE;H2AZ_MOUSE	-inf	4.65535e-07	5.39055e-06	0.000107579
Q8BGR6	Arl15	ADP-ribosylation factor-like protein 15	ARL15_MOUSE	-inf	4.67551e-07	5.40292e-06	4.2933e-05
Q9CQX8	Mrps36	28S ribosomal protein S36, mitochondrial	RT36_MOUSE	-inf	4.68856e-07	5.40703e-06	2.97421e-05
P83870	Phf5a	PHD finger-like domain-containing protein 5A	PHF5A_MOUSE	-inf	4.69943e-07	5.40861e-06	1.14856e-05
Q9D1H6	Ndufaf4	NADH dehydrogenase [ubiquinone] 1 alpha subcomplex assembly factor 4	NDUF4_MOUSE	-inf	4.71422e-07	5.4147e-06	4.32309e-05
Q3U7U3	Fbxo7	F-box only protein 7	FBX7_MOUSE	-inf	4.72656e-07	5.41795e-06	1.04521e-05
Q91WM1	Strbp	Spermatid perinuclear RNA-binding protein	STRBP_MOUSE	-inf	4.74655e-07	5.42558e-06	1.1116e-05
Q9ES34	Ube3b	Ubiquitin-protein ligase E3B	UBE3B_MOUSE	-inf	4.75226e-07	5.42558e-06	4.0883e-06
Q3ULF4	Spg7	Paraplegin	SPG7_MOUSE	-inf	4.76323e-07	5.42723e-06	1.3414e-05
Q8K0Z7	Taco1	Translational activator of cytochrome c oxidase 1	TACO1_MOUSE	-inf	4.79648e-07	5.4542e-06	2.95765e-05
Q99KK7	Dpp3	Dipeptidyl peptidase 3	DPP3_MOUSE	-inf	4.80776e-07	5.45614e-06	4.49995e-05
A2ASQ1	Agrn	Agrin	AGRIN_MOUSE	-inf	4.8435e-07	5.48037e-06	1.58635e-05
Q60759	Gcdh	Glutaryl-CoA dehydrogenase, mitochondrial	GCDH_MOUSE	-inf	4.85127e-07	5.48037e-06	3.35744e-05
P36552	Cpox	Oxygen-dependent coproporphyrinogen-III oxidase, mitochondrial	HEM6_MOUSE	-inf	4.85797e-07	5.48037e-06	1.2664e-05
Q91WK5	Gcsh	Glycine cleavage system H protein, mitochondrial	GCSH_MOUSE	-inf	4.88968e-07	5.50524e-06	6.51705e-05
Q3UQ84	Tars2	Threonine--tRNA ligase, mitochondrial	SYTM_MOUSE	-inf	4.90661e-07	5.51341e-06	1.93964e-05
Q9JKY5	Hip1r	Huntingtin-interacting protein 1-related protein	HIP1R_MOUSE	2.4244	4.92511e-07	5.51735e-06	0.000161999
Q3U214	Mast3	Microtubule-associated serine/threonine-protein kinase 3	MAST3_MOUSE	-inf	4.93517e-07	5.51735e-06	1.21424e-05
Q8C547	Heatr5b	HEAT repeat-containing protein 5B	HTR5B_MOUSE	-inf	4.94059e-07	5.51735e-06	6.27816e-06
Q61647	Has1	Hyaluronan synthase 1	HYAS1_MOUSE	-inf	4.94886e-07	5.51735e-06	0.000125962
Q64511	Top2b	DNA topoisomerase 2-beta	TOP2B_MOUSE	-inf	4.97956e-07	5.54074e-06	1.02562e-05
Q8BYB9	Poglut1	Protein O-glucosyltransferase 1	PGLT1_MOUSE	-inf	5.0028e-07	5.55574e-06	6.02473e-06
Q9DB72	Btbd17	BTB/POZ domain-containing protein 17	BTBDH_MOUSE	-inf	5.03861e-07	5.56616e-06	2.20703e-05
P50171	Hsd17b8	Estradiol 17-beta-dehydrogenase 8	DHB8_MOUSE	-inf	5.05885e-07	5.56616e-06	4.30195e-05
Q8R066	C1qtnf4	Complement C1q tumor necrosis factor-related protein 4	C1QT4_MOUSE	-inf	5.05889e-07	5.56616e-06	1.03799e-05
P97411	Ica1	Islet cell autoantigen 1	ICA69_MOUSE	2.87087	5.05998e-07	5.56616e-06	0.000112603
P0DP60	Lynx1	Ly-6/neurotoxin-like protein 1	LYNX1_MOUSE	-inf	5.06103e-07	5.56616e-06	0.000101992
Q9CRA7	Dmac2l	ATP synthase subunit s, mitochondrial	ATP5S_MOUSE	-inf	5.10456e-07	5.60321e-06	2.51938e-05
E9Q0C6	Kiaa1210	Acrosomal protein KIAA1210	K1210_MOUSE	4.73833	5.16496e-07	5.65156e-06	8.59469e-05
Q80WG5	Lrrc8a	Volume-regulated anion channel subunit LRRC8A	LRC8A_MOUSE	-inf	5.16845e-07	5.65156e-06	1.47904e-05
P54726	Rad23a	UV excision repair protein RAD23 homolog A	RD23A_MOUSE	-inf	5.27926e-07	5.76168e-06	8.02639e-05
Q9D924	Isca1	Iron-sulfur cluster assembly 1 homolog, mitochondrial	ISCA1_MOUSE	-inf	5.32303e-07	5.79834e-06	2.08675e-05
Q3TW96	Uap1l1	UDP-N-acetylhexosamine pyrophosphorylase-like protein 1	UAP1L_MOUSE	-inf	5.38924e-07	5.85381e-06	1.31669e-05
P56376	Acyp1	Acylphosphatase-1	ACYP1_MOUSE	-inf	5.39451e-07	5.85381e-06	7.93008e-05
Q6P4S6	Sik3	Serine/threonine-protein kinase SIK3	SIK3_MOUSE	-inf	5.44042e-07	5.88742e-06	8.57539e-05
O35387	Hax1	HCLS1-associated protein X-1	HAX1_MOUSE	-inf	5.45511e-07	5.88742e-06	1.29246e-05
Q8R0G7	Spns1	Protein spinster homolog 1	SPNS1_MOUSE	-inf	5.45648e-07	5.88742e-06	4.30119e-06
Q3UGX3	Nat8l	N-acetylaspartate synthetase	NAT8L_MOUSE	-inf	5.47642e-07	5.89776e-06	6.98707e-06
Q99KP3	Cryl1	Lambda-crystallin homolog	CRYL1_MOUSE	-inf	5.51466e-07	5.92774e-06	1.86757e-05
Q8BYN5	Fsd1l	FSD1-like protein	FSD1L_MOUSE	-inf	5.54856e-07	5.95287e-06	1.24909e-05
Q8R2Y8	Ptrh2	Peptidyl-tRNA hydrolase 2, mitochondrial	PTH2_MOUSE	-inf	5.5742e-07	5.95287e-06	2.32793e-05
Q8K3W0	Babam2	BRISC and BRCA1-A complex member 2	BABA2_MOUSE	-inf	5.57511e-07	5.95287e-06	1.73911e-05
Q9CQC9	Sar1b	GTP-binding protein SAR1b	SAR1B_MOUSE	-inf	5.57984e-07	5.95287e-06	3.0212e-05
P39087	Grik2	Glutamate receptor ionotropic, kainate 2	GRIK2_MOUSE	-inf	5.64378e-07	6.00485e-06	1.18094e-05
Q99LB2	Dhrs4	Dehydrogenase/reductase SDR family member 4	DHRS4_MOUSE	-inf	5.64964e-07	6.00485e-06	3.57e-05
Q61387	Cox7a2l	Cytochrome c oxidase subunit 7A-related protein, mitochondrial	COX7R_MOUSE	-inf	5.69027e-07	6.01337e-06	1.13715e-05
Q7M6Z0	Rtn4rl2	Reticulon-4 receptor-like 2	R4RL2_MOUSE	-inf	5.71369e-07	6.01337e-06	7.0663e-06
Q8BZT9	Lacc1	Laccase domain-containing protein 1	LACC1_MOUSE	-inf	5.71852e-07	6.01337e-06	4.4391e-05
P0C192	Lrrc4b	Leucine-rich repeat-containing protein 4B	LRC4B_MOUSE	-inf	5.71896e-07	6.01337e-06	1.16568e-05
P41242	Matk	Megakaryocyte-associated tyrosine-protein kinase	MATK_MOUSE	-inf	5.72627e-07	6.01337e-06	9.19864e-06
Q6PDH0	Phldb1	Pleckstrin homology-like domain family B member 1	PHLB1_MOUSE	-inf	5.74316e-07	6.01337e-06	2.5506e-06
Q8R3B1	Plcd1	1-phosphatidylinositol 4,5-bisphosphate phosphodiesterase delta-1	PLCD1_MOUSE	-inf	5.74782e-07	6.01337e-06	8.69977e-06
Q8BHZ0	Fam49a	Protein FAM49A	FA49A_MOUSE	-inf	5.74851e-07	6.01337e-06	9.86321e-05
P20352	F3	Tissue factor	TF_MOUSE	-inf	5.75265e-07	6.01337e-06	1.82305e-05
Q9DA03	Lyrm7	Complex III assembly factor LYRM7	LYRM7_MOUSE	-inf	5.83115e-07	6.07766e-06	1.11116e-05
P02468	Lamc1	Laminin subunit gamma-1	LAMC1_MOUSE	-inf	5.8453e-07	6.07766e-06	2.51394e-05
Q91YW3	Dnajc3	DnaJ homolog subfamily C member 3	DNJC3_MOUSE	-inf	5.84616e-07	6.07766e-06	5.26011e-06
Q61249	Igbp1	Immunoglobulin-binding protein 1	IGBP1_MOUSE	2.19604	5.85887e-07	6.0792e-06	8.04977e-05
Q9JHI5	Ivd	Isovaleryl-CoA dehydrogenase, mitochondrial	IVD_MOUSE	-inf	5.87446e-07	6.0792e-06	0.000100427
Q3UI43	Babam1	BRISC and BRCA1-A complex member 1	BABA1_MOUSE	-inf	5.88153e-07	6.0792e-06	1.43789e-05
Q8R326	Pspc1	Paraspeckle component 1	PSPC1_MOUSE	-inf	5.89033e-07	6.0792e-06	9.61414e-05
Q9JIZ9	Plscr3	Phospholipid scramblase 3	PLS3_MOUSE	3.17694	5.90602e-07	6.08058e-06	9.52723e-05
Q9D7B6	Acad8	Isobutyryl-CoA dehydrogenase, mitochondrial	ACAD8_MOUSE	-inf	5.91301e-07	6.08058e-06	3.55873e-05
Q01815	Cacna1c	Voltage-dependent L-type calcium channel subunit alpha-1C	CAC1C_MOUSE	-inf	6.00349e-07	6.1625e-06	2.71479e-06
Q8VE47	Uba5	Ubiquitin-like modifier-activating enzyme 5	UBA5_MOUSE	2.61522	6.022e-07	6.17039e-06	0.000188169
Q9CQV5	Mrps24	28S ribosomal protein S24, mitochondrial	RT24_MOUSE	-inf	6.05729e-07	6.1954e-06	1.79537e-05
Q99J83	Atg5	Autophagy protein 5	ATG5_MOUSE	-inf	6.14241e-07	6.2712e-06	8.64739e-06
Q80UM7	Mogs	Mannosyl-oligosaccharide glucosidase	MOGS_MOUSE	-inf	6.16422e-07	6.27238e-06	9.26597e-06
Q80XE1	Ric8b	Synembryn-B	RIC8B_MOUSE	-inf	6.16558e-07	6.27238e-06	0.000253923
Q8R349	Cdc16	Cell division cycle protein 16 homolog	CDC16_MOUSE	-inf	6.18415e-07	6.27459e-06	6.37221e-06
Q8BFZ3	Actbl2	Beta-actin-like protein 2	ACTBL_MOUSE	-inf	6.18979e-07	6.27459e-06	2.34811e-05
Q6GQS1	Slc25a23	Calcium-binding mitochondrial carrier protein SCaMC-3	SCMC3_MOUSE	-inf	6.2328e-07	6.30697e-06	3.54587e-05
Q9WUB4	Dctn6	Dynactin subunit 6	DCTN6_MOUSE	-inf	6.31028e-07	6.37405e-06	1.81121e-05
P10833	Rras	Ras-related protein R-Ras	RRAS_MOUSE	-inf	6.34042e-07	6.38503e-06	1.68946e-05
Q9WTS4	Tenm1	Teneurin-1	TEN1_MOUSE	-inf	6.34859e-07	6.38503e-06	6.2847e-06
Q8VDP4	Ccar2	Cell cycle and apoptosis regulator protein 2	CCAR2_MOUSE	-inf	6.35477e-07	6.38503e-06	2.00218e-05
Q9CWZ3	Rbm8a	RNA-binding protein 8A	RBM8A_MOUSE	-inf	6.3863e-07	6.40075e-06	1.64532e-05
O88851	Rbbp9	Putative hydrolase RBBP9	RBBP9_MOUSE	-inf	6.39288e-07	6.40075e-06	7.16547e-05
Q9DB77	Uqcrc2	Cytochrome b-c1 complex subunit 2, mitochondrial	QCR2_MOUSE	-3.13799	6.45516e-07	6.45176e-06	0.000397687
Q64373	Bcl2l1	Bcl-2-like protein 1	B2CL1_MOUSE	-inf	6.50405e-07	6.48924e-06	1.11262e-05
Q5SSZ5	Tns3	Tensin-3	TENS3_MOUSE	-inf	6.52352e-07	6.49729e-06	8.67783e-06
Q8VE11	Mtmr6	Myotubularin-related protein 6	MTMR6_MOUSE	3.38141	6.55251e-07	6.51109e-06	4.59178e-05
Q8BYL4	Yars2	Tyrosine--tRNA ligase, mitochondrial	SYYM_MOUSE	-inf	6.56251e-07	6.51109e-06	1.23267e-05
Q64471	Gstt1	Glutathione S-transferase theta-1	GSTT1_MOUSE	-inf	6.57735e-07	6.51109e-06	8.99546e-06
O54834	Arhgap6	Rho GTPase-activating protein 6	RHG06_MOUSE	2.6283	6.58534e-07	6.51109e-06	5.54189e-05
P61458	Pcbd1	Pterin-4-alpha-carbinolamine dehydratase	PHS_MOUSE	-inf	6.59452e-07	6.51109e-06	3.8588e-05
Q80X73	Pelo	Protein pelota homolog	PELO_MOUSE	-inf	6.61225e-07	6.5173e-06	3.00615e-06
P26339	Chga	Chromogranin-A	CMGA_MOUSE	-inf	6.69739e-07	6.57864e-06	1.31941e-05
Q8BM13	Olfm2	Noelin-2	NOE2_MOUSE	-inf	6.70856e-07	6.57864e-06	1.28397e-05
Q8C5Q4	Grsf1	G-rich sequence factor 1	GRSF1_MOUSE	-9.65693	6.70913e-07	6.57864e-06	6.74981e-06
Q9CZP5	Bcs1l	Mitochondrial chaperone BCS1	BCS1_MOUSE	-inf	6.72783e-07	6.58564e-06	2.66813e-05
Q9CZ83	Mrpl55	39S ribosomal protein L55, mitochondrial	RM55_MOUSE	-inf	6.80412e-07	6.63977e-06	1.07237e-05
Q505D7	Opa3	Optic atrophy 3 protein homolog	OPA3_MOUSE	-inf	6.81852e-07	6.63977e-06	4.27048e-05
Q9WU79	Prodh	Proline dehydrogenase 1, mitochondrial	PROD_MOUSE	-inf	6.81966e-07	6.63977e-06	1.40322e-05
Q8VDH1	Fbxo21	F-box only protein 21	FBX21_MOUSE	-inf	6.84906e-07	6.63977e-06	4.18371e-06
Q80ZU0	Arl5a	ADP-ribosylation factor-like protein 5A	ARL5A_MOUSE	-inf	6.86178e-07	6.63977e-06	3.41031e-06
Q7TQK5	Ccdc93	Coiled-coil domain-containing protein 93	CCD93_MOUSE	-inf	6.86934e-07	6.63977e-06	1.13449e-05
Q7TNV0	Dek	Protein DEK	DEK_MOUSE	-inf	6.8747e-07	6.63977e-06	9.09726e-05
Q8BVL9	Jakmip1	Janus kinase and microtubule-interacting protein 1	JKIP1_MOUSE	-inf	6.87636e-07	6.63977e-06	2.37496e-05
Q8BNU0	Armc6	Armadillo repeat-containing protein 6	ARMC6_MOUSE	-inf	6.90776e-07	6.65362e-06	2.05036e-05
O08914	Faah	Fatty-acid amide hydrolase 1	FAAH1_MOUSE	-inf	6.91704e-07	6.65362e-06	8.57051e-06
Q91YH5	Atl3	Atlastin-3	ATLA3_MOUSE	-inf	6.92574e-07	6.65362e-06	1.21626e-05
Q7TMM9	Tubb2a	Tubulin beta-2A chain	TBB2A_MOUSE	1.55871	6.96838e-07	6.68331e-06	0.00457354
Q8BK72	Mrps27	28S ribosomal protein S27, mitochondrial	RT27_MOUSE	-inf	6.98835e-07	6.6912e-06	1.26508e-05
Q6P9S0	Mtss2	Protein MTSS 2	MTSS2_MOUSE	3.02463	7.00721e-07	6.69799e-06	9.95384e-05
Q7M750	Opalin	Opalin	OPALI_MOUSE	-inf	7.0462e-07	6.72399e-06	7.18271e-05
Q80YD1	Supv3l1	ATP-dependent RNA helicase SUPV3L1, mitochondrial	SUV3_MOUSE	-inf	7.0715e-07	6.73645e-06	1.48026e-05
Q80UM3	Naa15	N-alpha-acetyltransferase 15, NatA auxiliary subunit	NAA15_MOUSE	-inf	7.08738e-07	6.73645e-06	1.95811e-05
P26043	Rdx	Radixin	RADI_MOUSE	-inf	7.09473e-07	6.73645e-06	0.000124086
Q9CQE5	Rgs10	Regulator of G-protein signaling 10	RGS10_MOUSE	-inf	7.13648e-07	6.76481e-06	1.64643e-05
Q9JJN6	Ctnnbip1	Beta-catenin-interacting protein 1	CNBP1_MOUSE	-inf	7.15916e-07	6.77017e-06	5.33839e-06
Q9DB29	Iah1	Isoamyl acetate-hydrolyzing esterase 1 homolog	IAH1_MOUSE	-inf	7.1659e-07	6.77017e-06	2.59181e-05
Q8VC88	Gca	Grancalcin	GRAN_MOUSE	-inf	7.19513e-07	6.78609e-06	9.62546e-06
P21619	Lmnb2	Lamin-B2	LMNB2_MOUSE	-inf	7.20658e-07	6.78609e-06	7.40752e-05
Q921S7	Mrpl37	39S ribosomal protein L37, mitochondrial	RM37_MOUSE	-inf	7.2515e-07	6.81712e-06	1.26928e-05
O08528	Hk2	Hexokinase-2	HXK2_MOUSE	-inf	7.31683e-07	6.86714e-06	0.000105996
Q8R313	Exoc6	Exocyst complex component 6	EXOC6_MOUSE	-inf	7.3288e-07	6.86714e-06	9.83882e-06
Q60603	Kcnh1;KCNH1;Kcnh5	Potassium voltage-gated channel subfamily H member 1;Potassium voltage-gated channel subfamily H member 1;Potassium voltage-gated channel subfamily H member 5	KCNH1_MOUSE;KCNH1_HUMAN;KCNH5_MOUSE	-inf	7.35545e-07	6.87823e-06	2.92136e-06
Q8QZR5	Gpt	Alanine aminotransferase 1	ALAT1_MOUSE	-inf	7.36479e-07	6.87823e-06	1.06398e-05
Q8CGU1	Calcoco1	Calcium-binding and coiled-coil domain-containing protein 1	CACO1_MOUSE	-inf	7.38259e-07	6.88357e-06	3.57249e-05
Q9JHL1	Slc9a3r2	Na(+)/H(+) exchange regulatory cofactor NHE-RF2	NHRF2_MOUSE	-inf	7.43735e-07	6.9233e-06	1.13812e-05
Q3V4B5	Commd6	COMM domain-containing protein 6	COMD6_MOUSE	-inf	7.51973e-07	6.98304e-06	6.36113e-06
Q8BHC4	Dcakd	Dephospho-CoA kinase domain-containing protein	DCAKD_MOUSE	-inf	7.52604e-07	6.98304e-06	1.39804e-05
Q9CQV7	Dnajc19	Mitochondrial import inner membrane translocase subunit TIM14	TIM14_MOUSE	-inf	7.5826e-07	7.02408e-06	1.85754e-05
Q9D554	Sf3a3	Splicing factor 3A subunit 3	SF3A3_MOUSE	-inf	7.60561e-07	7.03395e-06	1.81955e-05
Q9JHW2	Nit2	Omega-amidase NIT2	NIT2_MOUSE	-inf	7.66151e-07	7.07417e-06	4.97194e-05
Q8R035	Mrpl58	Peptidyl-tRNA hydrolase ICT1, mitochondrial	ICT1_MOUSE	-inf	7.67936e-07	7.07681e-06	1.53816e-05
P15388	Kcnc1	Potassium voltage-gated channel subfamily C member 1	KCNC1_MOUSE	-inf	7.69153e-07	7.07681e-06	6.77677e-06
Q91YP0	L2hgdh	L-2-hydroxyglutarate dehydrogenase, mitochondrial	L2HDH_MOUSE	-inf	7.71872e-07	7.07681e-06	2.46141e-05
Q0KK59	Unc79	Protein unc-79 homolog	UNC79_MOUSE	-inf	7.72271e-07	7.07681e-06	4.15251e-05
Q3TIR1	Trappc13	Trafficking protein particle complex subunit 13	TPC13_MOUSE	-inf	7.73919e-07	7.07681e-06	1.03671e-05
P50544	Acadvl	Very long-chain specific acyl-CoA dehydrogenase, mitochondrial	ACADV_MOUSE	-inf	7.76496e-07	7.07681e-06	3.25123e-05
E9Q7G0	Numa1	Nuclear mitotic apparatus protein 1	NUMA1_MOUSE	-inf	7.76825e-07	7.07681e-06	1.16456e-05
Q9R1V4	Adam11	Disintegrin and metalloproteinase domain-containing protein 11	ADA11_MOUSE	-inf	7.78294e-07	7.07681e-06	2.36049e-05
Q9ER72	Cars	Cysteine--tRNA ligase, cytoplasmic	SYCC_MOUSE	-inf	7.79642e-07	7.07681e-06	1.74064e-05
Q924D0	Rtn4ip1	Reticulon-4-interacting protein 1, mitochondrial	RT4I1_MOUSE	-inf	7.80313e-07	7.07681e-06	2.49845e-05
Q8BX10	Pgam5	Serine/threonine-protein phosphatase PGAM5, mitochondrial	PGAM5_MOUSE	-inf	7.81859e-07	7.07681e-06	1.35084e-05
Q99N96	Mrpl1	39S ribosomal protein L1, mitochondrial	RM01_MOUSE	-inf	7.8442e-07	7.07681e-06	5.00996e-06
Q9DCX2	Atp5pd	ATP synthase subunit d, mitochondrial	ATP5H_MOUSE	-4.45714	7.84723e-07	7.07681e-06	0.00125864
Q91W29	Cox4i2	Cytochrome c oxidase subunit 4 isoform 2, mitochondrial	COX42_MOUSE	-inf	7.84966e-07	7.07681e-06	8.87782e-06
Q8JZL3	Thtpa	Thiamine-triphosphatase	THTPA_MOUSE	-inf	7.8507e-07	7.07681e-06	7.43305e-06
Q9JI78	Ngly1	Peptide-N(4)-(N-acetyl-beta-glucosaminyl)asparagine amidase	NGLY1_MOUSE	-inf	7.87785e-07	7.08771e-06	5.0846e-06
Q9Z2M6	Ubl3	Ubiquitin-like protein 3	UBL3_MOUSE	-inf	7.88768e-07	7.08771e-06	8.17498e-06
Q3TUH1	Tamm41	Phosphatidate cytidylyltransferase, mitochondrial	TAM41_MOUSE	-inf	7.90519e-07	7.09227e-06	1.21238e-05
Q04899	Cdk18	Cyclin-dependent kinase 18	CDK18_MOUSE	-inf	7.93269e-07	7.09316e-06	1.14728e-05
Q3TWW8	Srsf6	Serine/arginine-rich splicing factor 6	SRSF6_MOUSE	-inf	7.94237e-07	7.09316e-06	1.53303e-05
Q99L85	Elp5	Elongator complex protein 5	ELP5_MOUSE	-inf	7.95039e-07	7.09316e-06	9.54794e-06
P28667	Marcksl1	MARCKS-related protein	MRP_MOUSE	-inf	7.96271e-07	7.09316e-06	3.41987e-05
Q921H8	Acaa1a	3-ketoacyl-CoA thiolase A, peroxisomal	THIKA_MOUSE	-inf	7.9779e-07	7.09316e-06	5.31466e-05
Q7TSH8	Tmem94	Transmembrane protein 94	TMM94_MOUSE	-inf	7.98548e-07	7.09316e-06	7.32074e-06
Q63829	Commd3	COMM domain-containing protein 3	COMD3_MOUSE	-inf	8.00697e-07	7.09316e-06	8.76352e-06
Q8JZN7	Rhot2	Mitochondrial Rho GTPase 2	MIRO2_MOUSE	-inf	8.01528e-07	7.09316e-06	1.43691e-05
Q4KMM3	Oxr1	Oxidation resistance protein 1	OXR1_MOUSE	-2.52461	8.01825e-07	7.09316e-06	0.000129006
Q9CQZ1	Hsbp1	Heat shock factor-binding protein 1	HSBP1_MOUSE	-inf	8.03885e-07	7.10036e-06	0.000110342
Q9JI39	Abcb10	ATP-binding cassette sub-family B member 10, mitochondrial	ABCBA_MOUSE	-inf	8.06062e-07	7.10856e-06	2.95834e-06
Q9WVL3	Slc12a7	Solute carrier family 12 member 7	S12A7_MOUSE	-inf	8.08855e-07	7.11378e-06	1.26615e-05
Q6P6M7	Sepsecs	O-phosphoseryl-tRNA(Sec) selenium transferase	SPCS_MOUSE	-inf	8.0915e-07	7.11378e-06	0.000278922
Q9DBF1	Aldh7a1	Alpha-aminoadipic semialdehyde dehydrogenase	AL7A1_MOUSE	-1.75881	8.11046e-07	7.11414e-06	0.000118577
P61022	Chp1	Calcineurin B homologous protein 1	CHP1_MOUSE	-inf	8.12532e-07	7.11414e-06	2.20138e-05
Q99KH8	Stk24	Serine/threonine-protein kinase 24	STK24_MOUSE	-inf	8.12938e-07	7.11414e-06	3.1377e-05
Q9D8N2	Dennd10	DENN domain-containing protein 10	DEN10_MOUSE	-inf	8.27791e-07	7.23301e-06	1.06615e-05
Q60649	Clpb	Caseinolytic peptidase B protein homolog	CLPB_MOUSE	-inf	8.30319e-07	7.23506e-06	1.94792e-05
Q9DBR0	Akap8	A-kinase anchor protein 8	AKAP8_MOUSE	-inf	8.30566e-07	7.23506e-06	1.78661e-06
Q6PDQ2	Chd4	Chromodomain-helicase-DNA-binding protein 4	CHD4_MOUSE	-inf	8.34017e-07	7.24312e-06	9.69036e-06
P28867	Prkcd	Protein kinase C delta type	KPCD_MOUSE	-inf	8.34033e-07	7.24312e-06	1.5282e-05
Q923D2	Blvrb	Flavin reductase (NADPH)	BLVRB_MOUSE	-inf	8.35764e-07	7.24316e-06	2.54438e-05
Q9R0Y5	Ak1	Adenylate kinase isoenzyme 1	KAD1_MOUSE	-2.09865	8.3658e-07	7.24316e-06	0.00045825
P21981	Tgm2	Protein-glutamine gamma-glutamyltransferase 2	TGM2_MOUSE	-inf	8.38393e-07	7.24783e-06	1.16852e-05
P62960	Ybx1	Y-box-binding protein 1	YBOX1_MOUSE	-inf	8.43497e-07	7.26185e-06	1.65328e-05
Q3UN90	Lyrm9	LYR motif-containing protein 9	LYRM9_MOUSE	-inf	8.43639e-07	7.26185e-06	4.63879e-06
Q925F2	Esam	Endothelial cell-selective adhesion molecule	ESAM_MOUSE	-inf	8.43838e-07	7.26185e-06	3.21933e-06
Q9CZN8	Qrsl1	Glutamyl-tRNA(Gln) amidotransferase subunit A, mitochondrial	GATA_MOUSE	-inf	8.46055e-07	7.26461e-06	8.34185e-06
Q14CH7	Aars2	Alanine--tRNA ligase, mitochondrial	SYAM_MOUSE	-inf	8.46709e-07	7.26461e-06	2.85731e-06
Q00PI9	Hnrnpul2	Heterogeneous nuclear ribonucleoprotein U-like protein 2	HNRL2_MOUSE	-inf	8.48745e-07	7.27113e-06	5.69346e-05
P16332	Mmut	Methylmalonyl-CoA mutase, mitochondrial	MUTA_MOUSE	-inf	8.50306e-07	7.27356e-06	3.94983e-05
Q9WTU6	Mapk9	Mitogen-activated protein kinase 9	MK09_MOUSE	-inf	8.56483e-07	7.31263e-06	3.309e-05
P35821	Ptpn1	Tyrosine-protein phosphatase non-receptor type 1	PTN1_MOUSE	-inf	8.58409e-07	7.31263e-06	5.94955e-06
P28741	Kif3a	Kinesin-like protein KIF3A	KIF3A_MOUSE	-inf	8.58724e-07	7.31263e-06	9.81261e-06
Q8BZZ3	Wwp1	NEDD4-like E3 ubiquitin-protein ligase WWP1	WWP1_MOUSE	-inf	8.64907e-07	7.35429e-06	8.92171e-06
O70591	Pfdn2	Prefoldin subunit 2	PFD2_MOUSE	-inf	8.67526e-07	7.36557e-06	6.94766e-05
Q9JKY0	Cnot9	CCR4-NOT transcription complex subunit 9	CNOT9_MOUSE	-inf	8.69904e-07	7.36877e-06	3.04324e-06
Q8VCW8	Acsf2	Medium-chain acyl-CoA ligase ACSF2, mitochondrial	ACSF2_MOUSE	-inf	8.7049e-07	7.36877e-06	3.93636e-05
P28650	Adss1	Adenylosuccinate synthetase isozyme 1	PURA1_MOUSE	-inf	8.74559e-07	7.37003e-06	2.1436e-05
Q9JKL4	Ndufaf3	NADH dehydrogenase [ubiquinone] 1 alpha subcomplex assembly factor 3	NDUF3_MOUSE	-inf	8.75004e-07	7.37003e-06	2.0595e-05
Q9QYK9	Pnck	Calcium/calmodulin-dependent protein kinase type 1B	KCC1B_MOUSE	-inf	8.75515e-07	7.37003e-06	9.96041e-06
Q8BHL5	Elmo2	Engulfment and cell motility protein 2	ELMO2_MOUSE	-inf	8.75813e-07	7.37003e-06	1.85112e-05
Q9ER73	Elp4	Elongator complex protein 4	ELP4_MOUSE	-inf	8.77328e-07	7.37188e-06	5.40588e-05
Q9JL56	Gde1	Glycerophosphodiester phosphodiesterase 1	GDE1_MOUSE	-inf	8.80013e-07	7.38355e-06	4.02615e-05
P55772	Entpd1	Ectonucleoside triphosphate diphosphohydrolase 1	ENTP1_MOUSE	-inf	8.83275e-07	7.40002e-06	4.10984e-06
O35604	Npc1	NPC intracellular cholesterol transporter 1	NPC1_MOUSE	-inf	8.86874e-07	7.41927e-06	7.46068e-06
P51863	Atp6v0d1	V-type proton ATPase subunit d 1	VA0D1_MOUSE	-1.24055	8.91597e-07	7.44784e-06	0.00126044
Q8K1N1	Pnpla8	Calcium-independent phospholipase A2-gamma	PLPL8_MOUSE	-inf	8.98192e-07	7.49194e-06	1.59298e-05
Q8C163	Exog	Nuclease EXOG, mitochondrial	EXOG_MOUSE	-inf	9.0178e-07	7.51088e-06	3.41619e-05
Q9CQ06	Mrpl24	39S ribosomal protein L24, mitochondrial	RM24_MOUSE	-inf	9.03774e-07	7.5165e-06	1.81598e-05
P97765	Wbp2	WW domain-binding protein 2	WBP2_MOUSE	2.48363	9.07616e-07	7.53744e-06	0.000719897
Q8BGP5	Tmem127	Transmembrane protein 127	TM127_MOUSE	-inf	9.11631e-07	7.54332e-06	3.11249e-05
Q8K1R7	Nek9	Serine/threonine-protein kinase Nek9	NEK9_MOUSE	-inf	9.15123e-07	7.54332e-06	8.88385e-06
O55137	Acot1	Acyl-coenzyme A thioesterase 1	ACOT1_MOUSE	-inf	9.15401e-07	7.54332e-06	4.90667e-05
Q70IV5	Synm	Synemin	SYNEM_MOUSE	-inf	9.15955e-07	7.54332e-06	1.59252e-06
Q9CWM4	Pfdn1	Prefoldin subunit 1	PFD1_MOUSE	-inf	9.1702e-07	7.54332e-06	4.65841e-05
Q9ES74	Nek7	Serine/threonine-protein kinase Nek7	NEK7_MOUSE	-inf	9.17825e-07	7.54332e-06	5.14803e-06
Q8CI75	Dis3l2	DIS3-like exonuclease 2	DI3L2_MOUSE	-inf	9.18892e-07	7.54332e-06	1.36767e-05
P26040	Ezr	Ezrin	EZRI_MOUSE	-inf	9.19903e-07	7.54332e-06	5.36406e-05
Q6GQU6	Lingo3	Leucine-rich repeat and immunoglobulin-like domain-containing nogo receptor-interacting protein 3	LIGO3_MOUSE	-inf	9.2099e-07	7.54332e-06	5.05308e-06
Q99N84	Mrps18b	28S ribosomal protein S18b, mitochondrial	RT18B_MOUSE	-inf	9.21564e-07	7.54332e-06	5.39948e-06
Q9CQE8	RTRAF	RNA transcription, translation and transport factor protein	RTRAF_MOUSE	-inf	9.23777e-07	7.55058e-06	1.91663e-05
Q8K268	Abcf3	ATP-binding cassette sub-family F member 3	ABCF3_MOUSE	-inf	9.26162e-07	7.55647e-06	5.71957e-06
Q0VBD0	Itgb8	Integrin beta-8	ITB8_MOUSE	-inf	9.27511e-07	7.55647e-06	1.02638e-05
Q6PDG5	Smarcc2	SWI/SNF complex subunit SMARCC2	SMRC2_MOUSE	-inf	9.28989e-07	7.55647e-06	1.5408e-05
Q9Z2W0	Dnpep	Aspartyl aminopeptidase	DNPEP_MOUSE	-1.79988	9.29802e-07	7.55647e-06	9.82927e-05
Q9WUN2	Tbk1	Serine/threonine-protein kinase TBK1	TBK1_MOUSE	-inf	9.34969e-07	7.58764e-06	4.7364e-06
Q9JK23	Psmg1	Proteasome assembly chaperone 1	PSMG1_MOUSE	-inf	9.36914e-07	7.5926e-06	5.66162e-06
Q08093	Cnn2	Calponin-2	CNN2_MOUSE	-inf	9.43449e-07	7.6347e-06	5.43472e-06
Q8BJU0	Sgta	Small glutamine-rich tetratricopeptide repeat-containing protein alpha	SGTA_MOUSE	-3.10004	9.47955e-07	7.64133e-06	0.000103621
P42125	Eci1	Enoyl-CoA delta isomerase 1, mitochondrial	ECI1_MOUSE	-inf	9.49513e-07	7.64133e-06	5.2567e-05
Q8BSZ2	Ap3s2	AP-3 complex subunit sigma-2	AP3S2_MOUSE	-inf	9.50299e-07	7.64133e-06	3.01042e-05
Q64253	Ly6e	Lymphocyte antigen 6E	LY6E_MOUSE	-inf	9.50855e-07	7.64133e-06	4.96418e-05
P49070	Camlg	Calcium signal-modulating cyclophilin ligand	CAMLG_MOUSE	-inf	9.50974e-07	7.64133e-06	6.81213e-06
Q4VA53	Pds5b	Sister chromatid cohesion protein PDS5 homolog B	PDS5B_MOUSE	-inf	9.5366e-07	7.64378e-06	5.35557e-06
E9Q5C9	Nolc1	Nucleolar and coiled-body phosphoprotein 1	NOLC1_MOUSE	-inf	9.53964e-07	7.64378e-06	1.80021e-05
Q6KAU4	Mvb12b	Multivesicular body subunit 12B	MB12B_MOUSE	-inf	9.56132e-07	7.64754e-06	8.03586e-06
Q9CPW3	Mrpl54	39S ribosomal protein L54, mitochondrial	RM54_MOUSE	-inf	9.57831e-07	7.64754e-06	4.30663e-06
P62077	Timm8b	Mitochondrial import inner membrane translocase subunit Tim8 B	TIM8B_MOUSE	-inf	9.58459e-07	7.64754e-06	3.77071e-05
Q8CFI7	Polr2b	DNA-directed RNA polymerase II subunit RPB2	RPB2_MOUSE	-inf	9.60478e-07	7.64865e-06	3.42065e-06
Q9D5J6	Shpk	Sedoheptulokinase	SHPK_MOUSE	-inf	9.62279e-07	7.64865e-06	2.02063e-06
Q9ER88	Dap3	28S ribosomal protein S29, mitochondrial	RT29_MOUSE	-inf	9.62626e-07	7.64865e-06	1.98387e-05
Q99P47	Cntnap4	Contactin-associated protein-like 4	CNTP4_MOUSE	3.29115	9.66152e-07	7.65869e-06	8.5543e-05
Q9D8Z2	Triap1	TP53-regulated inhibitor of apoptosis 1	TRIA1_MOUSE	-inf	9.67497e-07	7.65869e-06	1.28099e-05
Q9WVJ5	Crybb1	Beta-crystallin B1	CRBB1_MOUSE	-inf	9.67923e-07	7.65869e-06	3.7494e-06
Q9DBL2	Gdap2	Ganglioside-induced differentiation-associated protein 2	GDAP2_MOUSE	-inf	9.69487e-07	7.66042e-06	1.97342e-06
Q8R3S6	Exoc1	Exocyst complex component 1	EXOC1_MOUSE	-inf	9.72702e-07	7.67383e-06	2.24475e-05
Q9JI18	Lrp1b	Low-density lipoprotein receptor-related protein 1B	LRP1B_MOUSE	-inf	9.73877e-07	7.67383e-06	3.63196e-06
P08537	tuba	Tubulin alpha chain	TBA_XENLA	-inf	9.87761e-07	7.77242e-06	9.78607e-05
Q9QZN4	Fbxo6	F-box only protein 6	FBX6_MOUSE	-inf	9.89118e-07	7.77242e-06	1.15296e-05
Q6EDY6	Carmil1	F-actin-uncapping protein LRRC16A	CARL1_MOUSE	-inf	9.91553e-07	7.78083e-06	2.50854e-06
P97820	Map4k4	Mitogen-activated protein kinase kinase kinase kinase 4	M4K4_MOUSE	-inf	9.94539e-07	7.79352e-06	3.47909e-06
Q8BTZ7	Gmppb	Mannose-1-phosphate guanyltransferase beta	GMPPB_MOUSE	-inf	9.98307e-07	7.8123e-06	3.30208e-05
Q91WQ3	Yars	Tyrosine--tRNA ligase, cytoplasmic	SYYC_MOUSE	-1.449	1.00217e-06	7.81641e-06	6.67636e-05
Q3TC33	Ccdc127	Coiled-coil domain-containing protein 127	CC127_MOUSE	-inf	1.00256e-06	7.81641e-06	1.71995e-05
Q99LM2	Cdk5rap3	CDK5 regulatory subunit-associated protein 3	CK5P3_MOUSE	-inf	1.00295e-06	7.81641e-06	1.36365e-05
P70345	Bcl2l2	Bcl-2-like protein 2	B2CL2_MOUSE	-inf	1.00785e-06	7.83385e-06	1.45776e-05
Q9CWX2	Ndufaf1	Complex I intermediate-associated protein 30, mitochondrial	CIA30_MOUSE	-inf	1.00917e-06	7.83385e-06	1.10301e-05
Q9WUR9	Ak4	Adenylate kinase 4, mitochondrial	KAD4_MOUSE	-inf	1.00931e-06	7.83385e-06	7.25097e-05
Q99KR7	Ppif	Peptidyl-prolyl cis-trans isomerase F, mitochondrial	PPIF_MOUSE	-inf	1.01108e-06	7.8369e-06	2.95433e-05
Q07417	Acads	Short-chain specific acyl-CoA dehydrogenase, mitochondrial	ACADS_MOUSE	-inf	1.01461e-06	7.85355e-06	1.96967e-05
O54828	Rgs9	Regulator of G-protein signaling 9	RGS9_MOUSE	-3.09009	1.02353e-06	7.91186e-06	5.34641e-05
Q9JMK2	Csnk1e	Casein kinase I isoform epsilon	KC1E_MOUSE	-inf	1.02751e-06	7.93188e-06	1.49871e-05
Q9R0N3	Syt11	Synaptotagmin-11	SYT11_MOUSE	-inf	1.03014e-06	7.93237e-06	7.62319e-06
Q62433	Ndrg1	Protein NDRG1	NDRG1_MOUSE	-inf	1.03036e-06	7.93237e-06	4.20972e-05
O54818	Tpd52l1	Tumor protein D53	TPD53_MOUSE	-inf	1.04597e-06	8.04168e-06	1.01295e-05
Q61578	Fdxr	NADPH:adrenodoxin oxidoreductase, mitochondrial	ADRO_MOUSE	-inf	1.04988e-06	8.053e-06	5.23495e-06
Q9EPR5	Sorcs2	VPS10 domain-containing receptor SorCS2	SORC2_MOUSE	-inf	1.05027e-06	8.053e-06	1.55922e-05
Q8BYA0	Tbcd	Tubulin-specific chaperone D	TBCD_MOUSE	-inf	1.05296e-06	8.06278e-06	1.7614e-05
Q8BMD8	Slc25a24	Calcium-binding mitochondrial carrier protein SCaMC-1	SCMC1_MOUSE	-inf	1.05823e-06	8.09227e-06	4.48715e-06
Q9CQN7	Mrpl41	39S ribosomal protein L41, mitochondrial	RM41_MOUSE	-inf	1.06368e-06	8.12305e-06	6.78815e-06
Q60900	Elavl3	ELAV-like protein 3	ELAV3_MOUSE	-inf	1.06666e-06	8.13326e-06	4.05981e-05
Q6DFW4	Nop58	Nucleolar protein 58	NOP58_MOUSE	-inf	1.06787e-06	8.13326e-06	1.52025e-05
Q80X95	Rraga	Ras-related GTP-binding protein A	RRAGA_MOUSE	-inf	1.07154e-06	8.15026e-06	2.50912e-05
Q9JHG6	Rcan1	Calcipressin-1	RCAN1_MOUSE	-inf	1.07432e-06	8.16052e-06	2.11211e-05
Q9D1H8	Mrpl53	39S ribosomal protein L53, mitochondrial	RM53_MOUSE	-inf	1.07679e-06	8.1637e-06	5.90557e-06
Q14CH0	Fam171b	Protein FAM171B	F171B_MOUSE	-inf	1.0776e-06	8.1637e-06	1.0035e-05
O35405	Pld3	Phospholipase D3	PLD3_MOUSE	-2.79095	1.08968e-06	8.24424e-06	0.00012362
Q8BPG6	Sumf2	Inactive C-alpha-formylglycine-generating enzyme 2	SUMF2_MOUSE	-inf	1.09429e-06	8.24835e-06	1.39031e-06
Q8K448	Abca5	ATP-binding cassette sub-family A member 5	ABCA5_MOUSE	-inf	1.09619e-06	8.24835e-06	1.97096e-06
P62274	Rps29	40S ribosomal protein S29	RS29_MOUSE	-inf	1.09636e-06	8.24835e-06	3.15011e-05
P17183	Eno2	Gamma-enolase	ENOG_MOUSE	-1.29806	1.09737e-06	8.24835e-06	0.00169306
Q62443	Nptx1	Neuronal pentraxin-1	NPTX1_MOUSE	-inf	1.09746e-06	8.24835e-06	4.32973e-05
Q8K273	Mmgt1	Membrane magnesium transporter 1	MMGT1_MOUSE	-inf	1.10233e-06	8.27401e-06	1.30106e-05
Q99N89	Mrpl43	39S ribosomal protein L43, mitochondrial	RM43_MOUSE	-inf	1.10574e-06	8.2887e-06	1.32845e-05
P43275	H1-1	Histone H1.1	H11_MOUSE	-inf	1.11207e-06	8.32519e-06	1.87606e-05
P52332	Jak1	Tyrosine-protein kinase JAK1	JAK1_MOUSE	-inf	1.11732e-06	8.35352e-06	1.94675e-06
Q80WM4	Hapln4	Hyaluronan and proteoglycan link protein 4	HPLN4_MOUSE	-inf	1.11914e-06	8.35614e-06	2.61512e-05
Q3KNM2	44260	E3 ubiquitin-protein ligase MARCH5	MARH5_MOUSE	-inf	1.12175e-06	8.36464e-06	1.37103e-05
Q569Z6	Thrap3	Thyroid hormone receptor-associated protein 3	TR150_MOUSE	-inf	1.12615e-06	8.38647e-06	2.41175e-05
Q8K2T1	Nmral1	NmrA-like family domain-containing protein 1	NMRL1_MOUSE	-inf	1.13372e-06	8.42699e-06	4.46048e-05
Q9D1I5	Mcee	Methylmalonyl-CoA epimerase, mitochondrial	MCEE_MOUSE	-inf	1.13468e-06	8.42699e-06	1.56418e-05
P0DJF2	Pet117	Protein PET117 homolog, mitochondrial	PT117_MOUSE	-inf	1.13602e-06	8.42699e-06	6.05641e-06
Q61655	Ddx19a	ATP-dependent RNA helicase DDX19A	DD19A_MOUSE	-inf	1.14274e-06	8.45682e-06	1.49538e-05
Q8BTJ4	Enpp4	Bis(5'-adenosyl)-triphosphatase enpp4	ENPP4_MOUSE	-inf	1.14301e-06	8.45682e-06	5.19086e-06
Q9D8P4	Mrpl17	39S ribosomal protein L17, mitochondrial	RM17_MOUSE	-inf	1.14626e-06	8.4603e-06	1.19841e-05
Q9QYB1	Clic4	Chloride intracellular channel protein 4	CLIC4_MOUSE	-inf	1.1471e-06	8.4603e-06	7.05929e-05
Q8CE90	Map2k7	Dual specificity mitogen-activated protein kinase kinase 7	MP2K7_MOUSE	-inf	1.14798e-06	8.4603e-06	1.51744e-05
Q9JKF7	Mrpl39	39S ribosomal protein L39, mitochondrial	RM39_MOUSE	-inf	1.14942e-06	8.4603e-06	1.09484e-05
Q9WU84	Ccs	Copper chaperone for superoxide dismutase	CCS_MOUSE	-inf	1.15144e-06	8.46419e-06	5.16819e-06
Q9QZE5	Copg1	Coatomer subunit gamma-1	COPG1_MOUSE	-inf	1.1577e-06	8.4882e-06	1.62778e-05
Q9D8V7	Sec11c	Signal peptidase complex catalytic subunit SEC11C	SC11C_MOUSE	-inf	1.16002e-06	8.4882e-06	5.11274e-06
P21661	Pcsk2	Neuroendocrine convertase 2	NEC2_MOUSE	-inf	1.16294e-06	8.4882e-06	1.20985e-05
Q6P9J5	Kank4	KN motif and ankyrin repeat domain-containing protein 4	KANK4_MOUSE	5.81741	1.16337e-06	8.4882e-06	0.000156904
P24452	Capg	Macrophage-capping protein	CAPG_MOUSE	-8.55053	1.16511e-06	8.4882e-06	1.49512e-06
Q6NXK8	Asic1	Acid-sensing ion channel 1	ASIC1_MOUSE	-inf	1.16542e-06	8.4882e-06	1.07669e-05
Q925H0	Asic2	Acid-sensing ion channel 2	ASIC2_MOUSE	-inf	1.16725e-06	8.4882e-06	5.23504e-06
Q8BUR9	Mzt1	Mitotic-spindle organizing protein 1	MZT1_MOUSE	-inf	1.16801e-06	8.4882e-06	4.16657e-06
Q9CQY6	Uqcc2	Ubiquinol-cytochrome-c reductase complex assembly factor 2	UQCC2_MOUSE	-inf	1.16814e-06	8.4882e-06	3.42678e-05
Q9D6E4	Ttc9b	Tetratricopeptide repeat protein 9B	TTC9B_MOUSE	-inf	1.17075e-06	8.4882e-06	4.4537e-06
Q9JHK4	Rabggta	Geranylgeranyl transferase type-2 subunit alpha	PGTA_MOUSE	-inf	1.17109e-06	8.4882e-06	4.12842e-05
Q8VCR7	Abhd14b	Protein ABHD14B	ABHEB_MOUSE	-inf	1.17356e-06	8.49518e-06	1.9981e-05
Q3TZZ7	Esyt2	Extended synaptotagmin-2	ESYT2_MOUSE	-inf	1.17504e-06	8.49518e-06	7.38883e-06
Q9CQF0	Mrpl11	39S ribosomal protein L11, mitochondrial	RM11_MOUSE	-inf	1.18168e-06	8.53239e-06	1.13725e-05
Q8CCB4	Vps53	Vacuolar protein sorting-associated protein 53 homolog	VPS53_MOUSE	-inf	1.18729e-06	8.55742e-06	2.56736e-05
Q62165	Dag1	Dystroglycan	DAG1_MOUSE	-inf	1.18844e-06	8.55742e-06	1.20427e-05
Q8VDC0	Lars2	Probable leucine--tRNA ligase, mitochondrial	SYLM_MOUSE	-inf	1.19434e-06	8.55742e-06	1.41006e-05
Q9R0N0	Galk1	Galactokinase	GALK1_MOUSE	-inf	1.19452e-06	8.55742e-06	1.42724e-05
Q91W86	Vps11	Vacuolar protein sorting-associated protein 11 homolog	VPS11_MOUSE	-inf	1.19476e-06	8.55742e-06	1.89053e-05
O35691	Pnn	Pinin	PININ_MOUSE	-inf	1.19722e-06	8.55742e-06	7.7277e-06
Q99L27	Gmpr2	GMP reductase 2	GMPR2_MOUSE	-inf	1.19742e-06	8.55742e-06	1.45331e-05
Q9CQ10	Chmp3	Charged multivesicular body protein 3	CHMP3_MOUSE	-inf	1.19805e-06	8.55742e-06	2.13304e-05
Q61908	Cmc4	Cx9C motif-containing protein 4	CMC4_MOUSE	-inf	1.19929e-06	8.55742e-06	1.26117e-05
Q91ZJ5	Ugp2	UTP--glucose-1-phosphate uridylyltransferase	UGPA_MOUSE	-inf	1.20166e-06	8.55742e-06	6.21078e-05
Q3URE1	Acsf3	Malonate--CoA ligase ACSF3, mitochondrial	ACSF3_MOUSE	-inf	1.20167e-06	8.55742e-06	2.03464e-05
Q9QYF1	Rdh11	Retinol dehydrogenase 11	RDH11_MOUSE	-inf	1.20499e-06	8.5653e-06	9.66321e-06
Q8BGY2	Eif5a2	Eukaryotic translation initiation factor 5A-2	IF5A2_MOUSE	-inf	1.20644e-06	8.5653e-06	6.08549e-06
Q9CQJ8	Ndufb9	NADH dehydrogenase [ubiquinone] 1 beta subcomplex subunit 9	NDUB9_MOUSE	-3.74632	1.20846e-06	8.5653e-06	0.000208573
Q8R081	Hnrnpl	Heterogeneous nuclear ribonucleoprotein L	HNRPL_MOUSE	-2.11246	1.20879e-06	8.5653e-06	0.000145105
Q8R3R8	Gabarapl1;GABARAPL1	Gamma-aminobutyric acid receptor-associated protein-like 1	GBRL1_MOUSE;GBRL1_HUMAN	-inf	1.21195e-06	8.5744e-06	2.67224e-05
Q9D0D3	Mtpap	Poly(A) RNA polymerase, mitochondrial	PAPD1_MOUSE	-inf	1.21546e-06	8.5744e-06	1.94165e-06
Q9D1B9	Mrpl28	39S ribosomal protein L28, mitochondrial	RM28_MOUSE	-inf	1.21792e-06	8.5744e-06	1.0451e-05
Q8BYP3	Rhof	Rho-related GTP-binding protein RhoF	RHOF_MOUSE	-inf	1.218e-06	8.5744e-06	4.16903e-06
Q9CQA6	Chchd1	Coiled-coil-helix-coiled-coil-helix domain-containing protein 1	CHCH1_MOUSE	-inf	1.21862e-06	8.5744e-06	7.13324e-06
Q9CQV4	Retreg3	Reticulophagy regulator 3	RETR3_MOUSE	-inf	1.21911e-06	8.5744e-06	1.0698e-05
Q8BL86	Mblac2	Metallo-beta-lactamase domain-containing protein 2	MBLC2_MOUSE	-inf	1.22183e-06	8.58295e-06	1.96333e-05
O35683	Ndufa1	NADH dehydrogenase [ubiquinone] 1 alpha subcomplex subunit 1	NDUA1_MOUSE	-inf	1.22355e-06	8.58442e-06	0.000108511
Q9CQL5	Mrpl18	39S ribosomal protein L18, mitochondrial	RM18_MOUSE	-inf	1.22555e-06	8.58791e-06	1.1505e-05
Q9CXI0	Coq5	2-methoxy-6-polyprenyl-1,4-benzoquinol methylase, mitochondrial	COQ5_MOUSE	-inf	1.2295e-06	8.60498e-06	1.16994e-05
Q60936	Coq8a	Atypical kinase COQ8A, mitochondrial	COQ8A_MOUSE	-inf	1.23322e-06	8.61088e-06	1.30226e-05
Q91X97	Ncald	Neurocalcin-delta	NCALD_MOUSE	-3.21471	1.23336e-06	8.61088e-06	0.000196647
Q8BML9	Qars	Glutamine--tRNA ligase	SYQ_MOUSE	-inf	1.24123e-06	8.65069e-06	1.64798e-05
Q8BPM0	Daam1	Disheveled-associated activator of morphogenesis 1	DAAM1_MOUSE	-inf	1.24291e-06	8.65069e-06	1.18027e-05
Q8BFY6	Pef1	Peflin	PEF1_MOUSE	3.31075	1.24379e-06	8.65069e-06	0.000526944
Q9CQ65	Mtap	S-methyl-5'-thioadenosine phosphorylase	MTAP_MOUSE	1.86392	1.24514e-06	8.65069e-06	7.59258e-05
P50580	Pa2g4	Proliferation-associated protein 2G4	PA2G4_MOUSE	-inf	1.24752e-06	8.65316e-06	4.79795e-05
P14576	Srp54	Signal recognition particle 54 kDa protein	SRP54_MOUSE	-inf	1.24853e-06	8.65316e-06	3.4626e-05
Q9D7N9	Apmap	Adipocyte plasma membrane-associated protein	APMAP_MOUSE	-inf	1.25479e-06	8.68592e-06	4.57863e-05
Q7TPV4	Mybbp1a	Myb-binding protein 1A	MBB1A_MOUSE	-inf	1.25749e-06	8.69405e-06	9.68855e-06
P29533	Vcam1	Vascular cell adhesion protein 1	VCAM1_MOUSE	-inf	1.26421e-06	8.72225e-06	9.37689e-06
Q60648	Gm2a	Ganglioside GM2 activator	SAP3_MOUSE	-inf	1.26463e-06	8.72225e-06	6.67488e-06
C0HK79	Arxes1;Arxes2	Adipocyte-related X-chromosome expressed sequence 1;Adipocyte-related X-chromosome expressed sequence 2	ARXS1_MOUSE;ARXS2_MOUSE	-inf	1.26998e-06	8.7486e-06	8.59306e-06
Q8R5L3	Vps39	Vam6/Vps39-like protein	VPS39_MOUSE	-inf	1.27523e-06	8.77416e-06	1.10461e-05
Q8BJ71	Nup93	Nuclear pore complex protein Nup93	NUP93_MOUSE	-inf	1.2808e-06	8.79838e-06	1.90995e-05
P59235	Nup43	Nucleoporin Nup43	NUP43_MOUSE	-inf	1.28184e-06	8.79838e-06	5.04625e-06
Q3ULD5	Mccc2	Methylcrotonoyl-CoA carboxylase beta chain, mitochondrial	MCCB_MOUSE	-inf	1.28381e-06	8.80128e-06	3.95194e-05
Q8CBF3	Ephb1	Ephrin type-B receptor 1	EPHB1_MOUSE	-inf	1.28546e-06	8.80201e-06	1.42595e-05
Q9JHR9	Nrip2	Nuclear receptor-interacting protein 2	NRIP2_MOUSE	-inf	1.29484e-06	8.8556e-06	1.24598e-05
Q9Z110	Aldh18a1	Delta-1-pyrroline-5-carboxylate synthase	P5CS_MOUSE	-inf	1.30216e-06	8.89498e-06	3.15544e-05
O35459	Ech1	Delta(3,5)-Delta(2,4)-dienoyl-CoA isomerase, mitochondrial	ECH1_MOUSE	-inf	1.30644e-06	8.9135e-06	2.67765e-05
Q9CPW4	Arpc5	Actin-related protein 2/3 complex subunit 5	ARPC5_MOUSE	-inf	1.31239e-06	8.93569e-06	0.000119647
Q3UFS0	Zyg11b	Protein zyg-11 homolog B	ZY11B_MOUSE	-inf	1.31283e-06	8.93569e-06	3.91731e-06
Q8CFI5	Pars2	Probable proline--tRNA ligase, mitochondrial	SYPM_MOUSE	-inf	1.31556e-06	8.94361e-06	9.1504e-06
Q9R112	Sqor	Sulfide:quinone oxidoreductase, mitochondrial	SQOR_MOUSE	-inf	1.31927e-06	8.95665e-06	8.34107e-06
Q99M71	Epdr1	Mammalian ependymin-related protein 1	EPDR1_MOUSE	-inf	1.32156e-06	8.95665e-06	5.99494e-05
Q9D8T7	Slirp	SRA stem-loop-interacting RNA-binding protein, mitochondrial	SLIRP_MOUSE	-inf	1.32219e-06	8.95665e-06	1.30936e-05
Q8R3F5	Mcat	Malonyl-CoA-acyl carrier protein transacylase, mitochondrial	FABD_MOUSE	-inf	1.32581e-06	8.97045e-06	1.19205e-05
O54833	Csnk2a2	Casein kinase II subunit alpha'	CSK22_MOUSE	-inf	1.32961e-06	8.98548e-06	2.31799e-05
Q8VE33	Gdap1l1	Ganglioside-induced differentiation-associated protein 1-like 1	GD1L1_MOUSE	1.54218	1.33279e-06	8.99119e-06	0.000340515
Q5SNZ0	Ccdc88a	Girdin	GRDN_MOUSE	-inf	1.33798e-06	8.99119e-06	4.56393e-06
Q08274	Dmwd	Dystrophia myotonica WD repeat-containing protein	DMWD_MOUSE	-inf	1.33864e-06	8.99119e-06	2.05736e-05
Q8BPB0	Mob1b	MOB kinase activator 1B	MOB1B_MOUSE	-inf	1.33893e-06	8.99119e-06	4.85026e-06
Q9ER39	Tor1a;TOR1A	Torsin-1A;Torsin-1A (Fragment)	TOR1A_MOUSE;TOR1A_CRICR	-inf	1.33975e-06	8.99119e-06	3.18144e-06
Q99NB1	Acss1	Acetyl-coenzyme A synthetase 2-like, mitochondrial	ACS2L_MOUSE	-inf	1.33992e-06	8.99119e-06	1.52414e-05
Q80Y17	Llgl1	Lethal(2) giant larvae protein homolog 1	L2GL1_MOUSE	-inf	1.3424e-06	8.99721e-06	3.54114e-05
Q7TNF0	Doc2a	Double C2-like domain-containing protein alpha	DOC2A_MOUSE	-inf	1.34952e-06	9.03436e-06	2.06594e-05
O35099	Map3k5	Mitogen-activated protein kinase kinase kinase 5	M3K5_MOUSE	-inf	1.35123e-06	9.03516e-06	3.38286e-06
P53995	Anapc1	Anaphase-promoting complex subunit 1	APC1_MOUSE	-inf	1.35837e-06	9.07223e-06	5.04755e-06
Q8BRU6	Slc18a2	Synaptic vesicular amine transporter	VMAT2_MOUSE	4.77994	1.3664e-06	9.11521e-06	0.00167603
Q8K479	C1qtnf5	Complement C1q tumor necrosis factor-related protein 5	C1QT5_MOUSE	-inf	1.36813e-06	9.11609e-06	2.45985e-06
Q9QX47	Son	Protein SON	SON_MOUSE	-inf	1.3717e-06	9.12444e-06	1.01999e-05
Q62507	Coch;COCH	Cochlin	COCH_MOUSE;COCH_HUMAN	-inf	1.37398e-06	9.12444e-06	5.91827e-06
O35737	Hnrnph1	Heterogeneous nuclear ribonucleoprotein H	HNRH1_MOUSE	-2.48506	1.37419e-06	9.12444e-06	0.000199613
P97449	Anpep	Aminopeptidase N	AMPN_MOUSE	-inf	1.38045e-06	9.15534e-06	5.82373e-06
P56394	Cox17	Cytochrome c oxidase copper chaperone	COX17_MOUSE	-inf	1.3836e-06	9.16554e-06	1.39534e-05
O88738	Birc6	Baculoviral IAP repeat-containing protein 6	BIRC6_MOUSE	-inf	1.38753e-06	9.17843e-06	3.70546e-06
Q8VDP3	Mical1	[F-actin]-monooxygenase MICAL1	MICA1_MOUSE	-inf	1.38877e-06	9.17843e-06	1.78634e-06
P62309	Snrpg	Small nuclear ribonucleoprotein G	RUXG_MOUSE	-inf	1.39321e-06	9.1971e-06	3.82087e-05
Q69ZS6	Sv2c	Synaptic vesicle glycoprotein 2C	SV2C_MOUSE	4.26269	1.39639e-06	9.20746e-06	0.00129133
Q3UX10	Tubal3	Tubulin alpha chain-like 3	TBAL3_MOUSE	4.8181	1.41164e-06	9.29726e-06	0.000396834
P83940	Eloc	Elongin-C	ELOC_MOUSE	-inf	1.41697e-06	9.32154e-06	4.47263e-05
Q8BIG7	Comtd1	Catechol O-methyltransferase domain-containing protein 1	CMTD1_MOUSE	-inf	1.42163e-06	9.33299e-06	3.09293e-05
Q7M6Y3	Picalm	Phosphatidylinositol-binding clathrin assembly protein	PICAL_MOUSE	4.92872	1.42311e-06	9.33299e-06	0.0011547
Q8CGC6	Rbm28	RNA-binding protein 28	RBM28_MOUSE	-inf	1.42383e-06	9.33299e-06	2.22203e-06
Q0V8T9	Cntnap5a	Contactin-associated protein like 5-1	CTP5A_MOUSE	-inf	1.42747e-06	9.33299e-06	5.35083e-06
Q8BGV8	Mief1	Mitochondrial dynamics protein MID51	MID51_MOUSE	-inf	1.42752e-06	9.33299e-06	4.32079e-06
O54941	Smarce1	SWI/SNF-related matrix-associated actin-dependent regulator of chromatin subfamily E member 1	SMCE1_MOUSE	-inf	1.42898e-06	9.33299e-06	8.01444e-06
Q99N91	Mrpl34	39S ribosomal protein L34, mitochondrial	RM34_MOUSE	-inf	1.43017e-06	9.33299e-06	1.12619e-05
P29341	Pabpc1	Polyadenylate-binding protein 1	PABP1_MOUSE	1.99387	1.43554e-06	9.3573e-06	0.000392134
Q9JLT4	Txnrd2	Thioredoxin reductase 2, mitochondrial	TRXR2_MOUSE	-inf	1.44061e-06	9.37958e-06	2.31263e-05
Q60738	Slc30a1	Zinc transporter 1	ZNT1_MOUSE	-inf	1.45462e-06	9.45287e-06	2.20588e-05
Q9ERI6	Rdh14	Retinol dehydrogenase 14	RDH14_MOUSE	-inf	1.45518e-06	9.45287e-06	4.61229e-05
Q8BYI6	Lpcat2	Lysophosphatidylcholine acyltransferase 2	PCAT2_MOUSE	-inf	1.46045e-06	9.47629e-06	2.5717e-06
Q8BZ81	Lrrtm3	Leucine-rich repeat transmembrane neuronal protein 3	LRRT3_MOUSE	-inf	1.46572e-06	9.49064e-06	2.90023e-06
Q9ESN4	C1ql3	Complement C1q-like protein 3	C1QL3_MOUSE	-inf	1.46844e-06	9.49064e-06	1.66291e-05
Q9DCS3	Mecr	Enoyl-[acyl-carrier-protein] reductase, mitochondrial	MECR_MOUSE	-inf	1.46905e-06	9.49064e-06	3.38391e-05
P17047	Lamp2	Lysosome-associated membrane glycoprotein 2	LAMP2_MOUSE	-inf	1.47269e-06	9.49064e-06	1.37536e-05
Q80U95	Ube3c	Ubiquitin-protein ligase E3C	UBE3C_MOUSE	-inf	1.47332e-06	9.49064e-06	1.39882e-05
Q6NS82	Retreg2	Reticulophagy regulator 2	RETR2_MOUSE	-inf	1.4739e-06	9.49064e-06	1.60045e-05
Q6P3A8	Bckdhb	2-oxoisovalerate dehydrogenase subunit beta, mitochondrial	ODBB_MOUSE	-inf	1.47484e-06	9.49064e-06	1.63106e-05
O88811	Stam2	Signal transducing adapter molecule 2	STAM2_MOUSE	3.73347	1.47599e-06	9.49064e-06	3.65232e-05
Q921M7	Fam49b	Protein FAM49B	FA49B_MOUSE	-inf	1.48331e-06	9.52449e-06	0.00018106
Q6PDC0	Rundc3b	RUN domain-containing protein 3B	RUN3B_MOUSE	-inf	1.4846e-06	9.52449e-06	4.41125e-06
P57774	Npy	Pro-neuropeptide Y	NPY_MOUSE	-inf	1.49366e-06	9.56218e-06	2.438e-05
Q3UUF8	Ankrd34b	Ankyrin repeat domain-containing protein 34B	AN34B_MOUSE	5.21457	1.49383e-06	9.56218e-06	0.00018132
Q921W4	Cryzl1	Quinone oxidoreductase-like protein 1	QORL1_MOUSE	-inf	1.49615e-06	9.5663e-06	1.30986e-05
Q3TWL2	Pip4p1	Type 1 phosphatidylinositol 4,5-bisphosphate 4-phosphatase	PP4P1_MOUSE	-inf	1.49867e-06	9.57109e-06	1.30339e-05
P32067	Ssb	Lupus La protein homolog	LA_MOUSE	-inf	1.50026e-06	9.57109e-06	5.72885e-05
Q3TC93	Hs1bp3	HCLS1-binding protein 3	H1BP3_MOUSE	-inf	1.50642e-06	9.59608e-06	3.41916e-06
Q8VHY0	Cspg4	Chondroitin sulfate proteoglycan 4	CSPG4_MOUSE	-inf	1.50755e-06	9.59608e-06	2.83836e-05
Q9JI99	Sgpp1	Sphingosine-1-phosphate phosphatase 1	SGPP1_MOUSE	-inf	1.51642e-06	9.64177e-06	2.62551e-06
Q8CHG3	Gcc2	GRIP and coiled-coil domain-containing protein 2	GCC2_MOUSE	-inf	1.51833e-06	9.64316e-06	2.16266e-06
Q8C1Y8	Ccz1	Vacuolar fusion protein CCZ1 homolog	CCZ1_MOUSE	-inf	1.52722e-06	9.68882e-06	9.92261e-06
Q9QXG2	Chm	Rab proteins geranylgeranyltransferase component A 1	RAE1_MOUSE	-inf	1.5354e-06	9.72349e-06	1.08869e-05
Q6ZPZ3	Zc3h4	Zinc finger CCCH domain-containing protein 4	ZC3H4_MOUSE	-inf	1.53654e-06	9.72349e-06	2.85721e-06
Q8BZ36	Rint1	RAD50-interacting protein 1	RINT1_MOUSE	-inf	1.5378e-06	9.72349e-06	1.97217e-06
Q9ES89	Extl2	Exostosin-like 2	EXTL2_MOUSE	-inf	1.54219e-06	9.7404e-06	8.03369e-06
Q9WVC3	Cav2	Caveolin-2	CAV2_MOUSE	-inf	1.54424e-06	9.74254e-06	2.16555e-06
Q9CQC7	Ndufb4	NADH dehydrogenase [ubiquinone] 1 beta subcomplex subunit 4	NDUB4_MOUSE	-inf	1.54981e-06	9.76691e-06	0.000204895
Q9JHQ5	Lztfl1	Leucine zipper transcription factor-like protein 1	LZTL1_MOUSE	-inf	1.55444e-06	9.78524e-06	1.38859e-05
P49769	Psen1	Presenilin-1	PSN1_MOUSE	-inf	1.5569e-06	9.78989e-06	4.39599e-06
Q8CBG9	Rnf170	E3 ubiquitin-protein ligase RNF170	RN170_MOUSE	-inf	1.56508e-06	9.83051e-06	7.32545e-06
Q9Z2D6	Mecp2	Methyl-CpG-binding protein 2	MECP2_MOUSE	-inf	1.5692e-06	9.8455e-06	6.46269e-05
Q9D154	Serpinb1a	Leukocyte elastase inhibitor A	ILEUA_MOUSE	-inf	1.57517e-06	9.87212e-06	3.93583e-05
Q9JIP6	Fzd2;Fzd7	Frizzled-2;Frizzled-7	FZD2_MOUSE;FZD7_MOUSE	-inf	1.57963e-06	9.88917e-06	5.69486e-06
P56392	Cox7a1	Cytochrome c oxidase subunit 7A1, mitochondrial	CX7A1_MOUSE	-inf	1.58436e-06	9.88942e-06	7.44194e-06
Q99KR3	Lactb2	Endoribonuclease LACTB2	LACB2_MOUSE	-inf	1.58443e-06	9.88942e-06	5.39077e-06
P70408	Cdh10	Cadherin-10	CAD10_MOUSE	-inf	1.58488e-06	9.88942e-06	1.05239e-05
Q3UMB5	Smcr8	Guanine nucleotide exchange protein SMCR8	SMCR8_MOUSE	2.1541	1.59076e-06	9.91525e-06	0.000139663
Q922J9	Far1	Fatty acyl-CoA reductase 1	FACR1_MOUSE	-inf	1.59415e-06	9.92557e-06	3.27627e-06
Q9CY57	Chtop	Chromatin target of PRMT1 protein	CHTOP_MOUSE	-inf	1.59662e-06	9.93004e-06	1.29977e-05
Q62422	Ostf1	Osteoclast-stimulating factor 1	OSTF1_MOUSE	-inf	1.60098e-06	9.9463e-06	6.17521e-06
Q8VE62	Paip1	Polyadenylate-binding protein-interacting protein 1	PAIP1_MOUSE	1.97237	1.60496e-06	9.95452e-06	0.000231788
O35609	Scamp3	Secretory carrier-associated membrane protein 3	SCAM3_MOUSE	2.5936	1.60579e-06	9.95452e-06	0.00018393
O55013	Trappc3	Trafficking protein particle complex subunit 3	TPPC3_MOUSE	-inf	1.61129e-06	9.97772e-06	7.47778e-05
O35855	Bcat2	Branched-chain-amino-acid aminotransferase, mitochondrial	BCAT2_MOUSE	-inf	1.61554e-06	9.98814e-06	1.01348e-05
Q91WK2	Eif3h	Eukaryotic translation initiation factor 3 subunit H	EIF3H_MOUSE	-inf	1.61648e-06	9.98814e-06	1.93142e-05
Q9Z0H4	Celf2	CUGBP Elav-like family member 2	CELF2_MOUSE	-4.4367	1.62222e-06	1.00128e-05	7.44794e-05
Q9D428	GOLGA7B	Golgin subfamily A member 7B	GOG7B_MOUSE	-inf	1.62462e-06	1.00168e-05	7.59778e-06
Q9DCA7	Caly	Neuron-specific vesicular protein calcyon	CALY_MOUSE	-inf	1.62851e-06	1.00298e-05	4.35275e-06
Q9R171	Cbln1	Cerebellin-1	CBLN1_MOUSE	-inf	1.6419e-06	1.0093e-05	9.65472e-06
Q5FWH7	Slc39a12	Zinc transporter ZIP12	S39AC_MOUSE	-inf	1.64251e-06	1.0093e-05	1.0699e-05
Q8JZW5	Sh2d5	SH2 domain-containing protein 5	SH2D5_MOUSE	-inf	1.64472e-06	1.0093e-05	3.87052e-05
Q8R104	Sirt3	NAD-dependent protein deacetylase sirtuin-3	SIR3_MOUSE	-inf	1.64585e-06	1.0093e-05	4.87418e-06
P0C0A3	Chmp6	Charged multivesicular body protein 6	CHMP6_MOUSE	-inf	1.64811e-06	1.0096e-05	3.61258e-05
Q8VI75	Ipo4	Importin-4	IPO4_MOUSE	-inf	1.65746e-06	1.01129e-05	1.35791e-05
Q8BGF8	Slc35d3	Solute carrier family 35 member D3	S35D3_MOUSE	-inf	1.65877e-06	1.01129e-05	7.802e-06
Q6PF93	Pik3c3	Phosphatidylinositol 3-kinase catalytic subunit type 3	PK3C3_MOUSE	-inf	1.65946e-06	1.01129e-05	1.31958e-05
Q9Z1Q9	Vars	Valine--tRNA ligase	SYVC_MOUSE	-inf	1.65966e-06	1.01129e-05	2.9948e-05
Q8VDI7	Ubac1	Ubiquitin-associated domain-containing protein 1	UBAC1_MOUSE	-inf	1.66092e-06	1.01129e-05	6.06955e-06
P59708	Sf3b6	Splicing factor 3B subunit 6	SF3B6_MOUSE	-inf	1.66153e-06	1.01129e-05	1.30772e-05
Q3TWN3	Cnnm2	Metal transporter CNNM2	CNNM2_MOUSE	-inf	1.66631e-06	1.01312e-05	8.21978e-06
E9Q735	Ube4a	Ubiquitin conjugation factor E4 A	UBE4A_MOUSE	-inf	1.678e-06	1.01914e-05	8.30934e-06
Q9R049	Amfr	E3 ubiquitin-protein ligase AMFR	AMFR_MOUSE	-inf	1.69265e-06	1.02695e-05	5.07935e-06
Q9Z0N1	Eif2s3x	Eukaryotic translation initiation factor 2 subunit 3, X-linked	IF2G_MOUSE	-inf	1.70062e-06	1.03068e-05	1.87626e-05
Q91WK0	Lrrfip2	Leucine-rich repeat flightless-interacting protein 2	LRRF2_MOUSE	-inf	1.70328e-06	1.0312e-05	6.3715e-06
O35075	Vps26c	Vacuolar protein sorting-associated protein 26C	VP26C_MOUSE	-inf	1.70558e-06	1.0315e-05	4.3261e-06
P26231	Ctnna1	Catenin alpha-1	CTNA1_MOUSE	-inf	1.71148e-06	1.03384e-05	0.000110375
Q8K2Q5	Chchd7	Coiled-coil-helix-coiled-coil-helix domain-containing protein 7	CHCH7_MOUSE	-inf	1.71491e-06	1.03384e-05	1.74522e-05
Q8CBY0	Gatc	Glutamyl-tRNA(Gln) amidotransferase subunit C, mitochondrial	GATC_MOUSE	-inf	1.71877e-06	1.03384e-05	9.06111e-06
Q9CZN7	Shmt2	Serine hydroxymethyltransferase, mitochondrial	GLYM_MOUSE	-inf	1.7191e-06	1.03384e-05	1.46656e-05
Q8CI32	Bag5	BAG family molecular chaperone regulator 5	BAG5_MOUSE	-inf	1.71954e-06	1.03384e-05	3.44484e-05
Q9JKL5	Tesc	Calcineurin B homologous protein 3	CHP3_MOUSE	-inf	1.72122e-06	1.03384e-05	2.93073e-05
Q9D8N0	Eef1g	Elongation factor 1-gamma	EF1G_MOUSE	-2.53484	1.7223e-06	1.03384e-05	0.000188417
O55057	Pde6d	Retinal rod rhodopsin-sensitive cGMP 3',5'-cyclic phosphodiesterase subunit delta	PDE6D_MOUSE	-inf	1.72655e-06	1.03384e-05	1.58234e-05
Q8VE70	Pdcd10	Programmed cell death protein 10	PDC10_MOUSE	-inf	1.72876e-06	1.03384e-05	3.32795e-05
P62858	Rps28	40S ribosomal protein S28	RS28_MOUSE	-inf	1.72932e-06	1.03384e-05	9.33676e-05
O88455	Dhcr7	7-dehydrocholesterol reductase	DHCR7_MOUSE	-inf	1.72942e-06	1.03384e-05	9.46084e-06
Q9WVG6	Carm1	Histone-arginine methyltransferase CARM1	CARM1_MOUSE	3.7952	1.73125e-06	1.03385e-05	9.84148e-05
P97952	Scn1b	Sodium channel subunit beta-1	SCN1B_MOUSE	-inf	1.73473e-06	1.03485e-05	3.89783e-05
P54731	Faf1	FAS-associated factor 1	FAF1_MOUSE	-inf	1.7391e-06	1.03637e-05	3.79005e-06
Q6IMP4	Panx2	Pannexin-2	PANX2_MOUSE	3.56826	1.74641e-06	1.03964e-05	1.86203e-05
Q8K010	Oplah	5-oxoprolinase	OPLA_MOUSE	-inf	1.75169e-06	1.04169e-05	1.06043e-05
Q8BHE8	Maip1	m-AAA protease-interacting protein 1, mitochondrial	MAIP1_MOUSE	-inf	1.7544e-06	1.04221e-05	1.80365e-05
Q61234	Snta1	Alpha-1-syntrophin	SNTA1_MOUSE	-inf	1.7687e-06	1.04961e-05	3.02062e-05
B2RXS4	Plxnb2	Plexin-B2	PLXB2_MOUSE	-inf	1.78547e-06	1.05846e-05	1.15476e-05
Q4PJX1	Odr4	Protein odr-4 homolog	ODR4_MOUSE	-inf	1.79124e-06	1.06078e-05	3.87035e-06
Q8CFV4	Nrn1	Neuritin	NRN1_MOUSE	-inf	1.79311e-06	1.06079e-05	4.14004e-05
Q8R0H9	Gga1	ADP-ribosylation factor-binding protein GGA1	GGA1_MOUSE	-inf	1.80307e-06	1.06557e-05	2.70801e-05
P51791	Clcn3	H(+)/Cl(-) exchange transporter 3	CLCN3_MOUSE	-inf	1.80682e-06	1.06567e-05	1.22066e-05
P0CW02	Ly6c1	Lymphocyte antigen 6C1	LY6C1_MOUSE	-inf	1.80698e-06	1.06567e-05	1.44337e-05
P61963	Dcaf7	DDB1- and CUL4-associated factor 7	DCAF7_MOUSE	-inf	1.8137e-06	1.06852e-05	1.87156e-05
D3Z7P3	Gls	Glutaminase kidney isoform, mitochondrial	GLSK_MOUSE	-2.26713	1.81693e-06	1.06873e-05	0.000350256
Q61739	Itga6	Integrin alpha-6	ITA6_MOUSE	-inf	1.81779e-06	1.06873e-05	3.35705e-06
Q9D273	Mmab	Corrinoid adenosyltransferase	MMAB_MOUSE	-inf	1.83647e-06	1.07815e-05	3.8082e-05
Q61418	Clcn4	H(+)/Cl(-) exchange transporter 4	CLCN4_MOUSE	-inf	1.83761e-06	1.07815e-05	6.05764e-06
Q61672	Slc29a2	Equilibrative nucleoside transporter 2	S29A2_MOUSE	-inf	1.86851e-06	1.09418e-05	8.51321e-06
Q99JW2	Acy1	Aminoacylase-1	ACY1_MOUSE	-inf	1.87117e-06	1.09418e-05	2.61262e-05
O70551	Srpk1	SRSF protein kinase 1	SRPK1_MOUSE	-inf	1.87587e-06	1.09418e-05	2.1162e-06
P48758	Cbr1	Carbonyl reductase [NADPH] 1	CBR1_MOUSE	-1.83009	1.87648e-06	1.09418e-05	0.000346285
Q6PDN3	Mylk	Myosin light chain kinase, smooth muscle	MYLK_MOUSE	-inf	1.87692e-06	1.09418e-05	6.28581e-06
Q9CQI7	Snrpb2	U2 small nuclear ribonucleoprotein B''	RU2B_MOUSE	-inf	1.87818e-06	1.09418e-05	1.25689e-05
Q8BW96	Camk1d	Calcium/calmodulin-dependent protein kinase type 1D	KCC1D_MOUSE	-inf	1.87838e-06	1.09418e-05	4.29262e-05
Q6WQJ1	Dagla	Sn1-specific diacylglycerol lipase alpha	DGLA_MOUSE	-inf	1.88208e-06	1.09522e-05	1.18731e-05
Q9EQG7	Enpp5	Ectonucleotide pyrophosphatase/phosphodiesterase family member 5	ENPP5_MOUSE	-inf	1.91707e-06	1.11444e-05	3.98214e-06
Q3TCH7	Cul4a	Cullin-4A	CUL4A_MOUSE	-inf	1.92248e-06	1.11645e-05	1.46971e-05
Q50H33	Kctd8	BTB/POZ domain-containing protein KCTD8	KCTD8_MOUSE	-inf	1.92658e-06	1.11769e-05	1.7632e-05
Q9CU62	Smc1a	Structural maintenance of chromosomes protein 1A	SMC1A_MOUSE	-inf	1.93028e-06	1.1187e-05	6.78919e-06
Q8JZS9	Mrpl48	39S ribosomal protein L48, mitochondrial	RM48_MOUSE	-inf	1.93455e-06	1.12003e-05	9.11098e-06
P40336	Vps26a	Vacuolar protein sorting-associated protein 26A	VP26A_MOUSE	-1.34957	1.94842e-06	1.12619e-05	7.32616e-05
P70698	Ctps1	CTP synthase 1	PYRG1_MOUSE	-inf	1.94914e-06	1.12619e-05	3.02589e-05
Q99J47	Dhrs7b	Dehydrogenase/reductase SDR family member 7B	DRS7B_MOUSE	-inf	1.95293e-06	1.12724e-05	1.48415e-05
Q8K1B8	Fermt3	Fermitin family homolog 3	URP2_MOUSE	-inf	1.95565e-06	1.12767e-05	2.66106e-06
Q8K354	Cbr3	Carbonyl reductase [NADPH] 3	CBR3_MOUSE	-inf	1.95905e-06	1.12848e-05	0.000243269
Q8VE99	Ccdc115	Coiled-coil domain-containing protein 115	CC115_MOUSE	-inf	1.96763e-06	1.13176e-05	3.00556e-06
Q8VIJ6	Sfpq	Splicing factor, proline- and glutamine-rich	SFPQ_MOUSE	-3.09578	1.96872e-06	1.13176e-05	0.000162689
O35326	Srsf5,Srsf5;SRSF5	Serine/arginine-rich splicing factor 5	SRSF5_MOUSE	-inf	1.97092e-06	1.13189e-05	1.76999e-05
Q99K70	Rragc	Ras-related GTP-binding protein C	RRAGC_MOUSE	2.1806	1.97408e-06	1.13205e-05	0.000129088
Q9CWW6	Pin4	Peptidyl-prolyl cis-trans isomerase NIMA-interacting 4	PIN4_MOUSE	-inf	1.97701e-06	1.13205e-05	9.52895e-06
O55060	Tpmt	Thiopurine S-methyltransferase	TPMT_MOUSE	-inf	1.97716e-06	1.13205e-05	6.76596e-06
Q9Z0V7	Timm17b	Mitochondrial import inner membrane translocase subunit Tim17-B	TI17B_MOUSE	-inf	1.98486e-06	1.13531e-05	1.14419e-05
Q61823	Pdcd4	Programmed cell death protein 4	PDCD4_MOUSE	-inf	1.98704e-06	1.13542e-05	6.25041e-05
Q91YQ3	Csdc2	Cold shock domain-containing protein C2	CSDC2_MOUSE	-inf	1.99799e-06	1.13952e-05	1.10959e-05
P97799	Nrsn1	Neurensin-1	NRSN1_MOUSE	-inf	1.99821e-06	1.13952e-05	6.43293e-06
P46735	Myo1b	Unconventional myosin-Ib	MYO1B_MOUSE	-inf	2.00058e-06	1.13973e-05	1.3365e-05
Q9DB16	Cab39l	Calcium-binding protein 39-like	CB39L_MOUSE	-inf	2.00771e-06	1.14144e-05	3.67356e-06
Q8CIE6	Copa	Coatomer subunit alpha	COPA_MOUSE	-inf	2.00798e-06	1.14144e-05	3.61934e-05
P22005	Penk	Proenkephalin-A	PENK_MOUSE	-inf	2.0096e-06	1.14144e-05	6.74834e-05
Q9QYI3	Dnajc7	DnaJ homolog subfamily C member 7	DNJC7_MOUSE	-inf	2.01279e-06	1.14212e-05	1.56838e-05
P27600	Gna12;GNA12	Guanine nucleotide-binding protein subunit alpha-12	GNA12_MOUSE;GNA12_HUMAN	-inf	2.02045e-06	1.14532e-05	4.87245e-06
Q8R4F1	Ntng2	Netrin-G2	NTNG2_MOUSE	-inf	2.02382e-06	1.14591e-05	6.08265e-06
P62307	Snrpf	Small nuclear ribonucleoprotein F	RUXF_MOUSE	-inf	2.02888e-06	1.14591e-05	1.4416e-05
Q9CWG8	Ndufaf7	Protein arginine methyltransferase NDUFAF7, mitochondrial	NDUF7_MOUSE	-inf	2.02927e-06	1.14591e-05	4.05502e-06
Q9CR09	Ufc1	Ubiquitin-fold modifier-conjugating enzyme 1	UFC1_MOUSE	-inf	2.02953e-06	1.14591e-05	5.6856e-05
Q8VD26	Tmem143	Transmembrane protein 143	TM143_MOUSE	-inf	2.03789e-06	1.14949e-05	5.37528e-06
P59281	Arhgap39	Rho GTPase-activating protein 39	RHG39_MOUSE	-inf	2.04234e-06	1.15086e-05	7.59571e-06
Q3SXD3	Hddc2	HD domain-containing protein 2	HDDC2_MOUSE	-inf	2.05968e-06	1.15778e-05	1.78814e-05
Q02111	Prkcq	Protein kinase C theta type	KPCT_MOUSE	-inf	2.06024e-06	1.15778e-05	1.26831e-05
Q8BYU6	Tor1aip2	Torsin-1A-interacting protein 2,Torsin-1A-interacting protein 2, isoform IFRG15	TOIP2_MOUSE	-inf	2.06072e-06	1.15778e-05	1.57528e-06
Q8K5B2	Mcfd2	Multiple coagulation factor deficiency protein 2 homolog	MCFD2_MOUSE	-inf	2.06706e-06	1.1602e-05	4.56522e-06
Q8VCX6	Kptn	KICSTOR complex protein kaptin	KPTN_MOUSE	-inf	2.0755e-06	1.16355e-05	4.1984e-06
Q08642	Padi2	Protein-arginine deiminase type-2	PADI2_MOUSE	-inf	2.07889e-06	1.16355e-05	3.97237e-05
Q8CI78	Rmnd1	Required for meiotic nuclear division protein 1 homolog	RMND1_MOUSE	-inf	2.07915e-06	1.16355e-05	9.82492e-06
Q6NZN0	Rbm26	RNA-binding protein 26	RBM26_MOUSE	-inf	2.08496e-06	1.16461e-05	2.83098e-06
Q6P5B0	Rrp12	RRP12-like protein	RRP12_MOUSE	-inf	2.08513e-06	1.16461e-05	2.33235e-06
Q9WUM5	Suclg1	Succinate--CoA ligase [ADP/GDP-forming] subunit alpha, mitochondrial	SUCA_MOUSE	-3.71243	2.09556e-06	1.16929e-05	0.00033514
Q9Z2Q5	Mrpl40	39S ribosomal protein L40, mitochondrial	RM40_MOUSE	-inf	2.10847e-06	1.17454e-05	9.38211e-06
Q8VDT9	Mrpl50	39S ribosomal protein L50, mitochondrial	RM50_MOUSE	-inf	2.1091e-06	1.17454e-05	1.07128e-05
Q99J85	Nptxr	Neuronal pentraxin receptor	NPTXR_MOUSE	-inf	2.12357e-06	1.18144e-05	6.04063e-05
P26369	U2af2	Splicing factor U2AF 65 kDa subunit	U2AF2_MOUSE	-inf	2.15006e-06	1.19501e-05	4.60625e-05
Q3V384	Afg1l	AFG1-like ATPase	AFG1L_MOUSE	-inf	2.15427e-06	1.19536e-05	8.8899e-06
Q99KP6	Prpf19	Pre-mRNA-processing factor 19	PRP19_MOUSE	-inf	2.15489e-06	1.19536e-05	5.27094e-05
Q8R3T5	Stxbp6	Syntaxin-binding protein 6	STXB6_MOUSE	-inf	2.15955e-06	1.19679e-05	1.84756e-05
Q9JMD3	Stard10	START domain-containing protein 10	STA10_MOUSE	-inf	2.16795e-06	1.20027e-05	2.74509e-05
Q3TY86	Aifm3	Apoptosis-inducing factor 3	AIFM3_MOUSE	-inf	2.17486e-06	1.20293e-05	1.36403e-05
Q8BFR4	Gns	N-acetylglucosamine-6-sulfatase	GNS_MOUSE	-inf	2.18628e-06	1.20807e-05	7.77167e-06
Q9D338	Mrpl19	39S ribosomal protein L19, mitochondrial	RM19_MOUSE	-inf	2.19433e-06	1.21135e-05	8.32283e-06
P59764	Dock4	Dedicator of cytokinesis protein 4	DOCK4_MOUSE	-inf	2.19657e-06	1.21141e-05	3.62451e-05
Q8CHQ0	Fbxo4	F-box only protein 4	FBX4_MOUSE	-inf	2.19921e-06	1.21169e-05	1.66319e-06
Q9D920	Borcs5	BLOC-1-related complex subunit 5	BORC5_MOUSE	-inf	2.20189e-06	1.212e-05	9.5718e-06
Q3UMY5	Eml4	Echinoderm microtubule-associated protein-like 4	EMAL4_MOUSE	-inf	2.20817e-06	1.21419e-05	5.00891e-06
P20152	Vim	Vimentin	VIME_MOUSE	-6.125	2.21149e-06	1.21419e-05	0.000483154
Q9R0M4	Podxl	Podocalyxin	PODXL_MOUSE	-inf	2.21226e-06	1.21419e-05	8.47295e-06
Q9JHU2	Palmd	Palmdelphin	PALMD_MOUSE	3.8976	2.21767e-06	1.2154e-05	0.00017411
Q9R0H0	Acox1	Peroxisomal acyl-coenzyme A oxidase 1	ACOX1_MOUSE	-inf	2.21989e-06	1.2154e-05	9.27823e-06
O88967	Yme1l1	ATP-dependent zinc metalloprotease YME1L1	YMEL1_MOUSE	-inf	2.22087e-06	1.2154e-05	9.92754e-06
Q9ESX5	Dkc1	H/ACA ribonucleoprotein complex subunit DKC1	DKC1_MOUSE	-inf	2.22308e-06	1.21544e-05	7.06863e-06
P62069	Usp46	Ubiquitin carboxyl-terminal hydrolase 46	UBP46_MOUSE	-inf	2.22987e-06	1.21799e-05	1.41106e-05
Q8BYI8	Fam234b	Protein FAM234B	F234B_MOUSE	-inf	2.23494e-06	1.21958e-05	8.64987e-06
Q07409	Cntn3	Contactin-3	CNTN3_MOUSE	-inf	2.2371e-06	1.2196e-05	1.23804e-05
Q9DC61	Pmpca	Mitochondrial-processing peptidase subunit alpha	MPPA_MOUSE	-inf	2.2446e-06	1.22251e-05	2.44552e-05
P60755	Mdga2	MAM domain-containing glycosylphosphatidylinositol anchor protein 2	MDGA2_MOUSE	-inf	2.26164e-06	1.23062e-05	6.65079e-06
Q60780	Gas7	Growth arrest-specific protein 7	GAS7_MOUSE	-inf	2.27367e-06	1.23598e-05	3.71994e-05
Q8BGC4	Zadh2	Prostaglandin reductase-3	PTGR3_MOUSE	-inf	2.28003e-06	1.23826e-05	9.45906e-05
Q8BIP0	Dars2	Aspartate--tRNA ligase, mitochondrial	SYDM_MOUSE	-inf	2.28926e-06	1.24087e-05	7.16156e-06
Q8K2B3	Sdha	Succinate dehydrogenase [ubiquinone] flavoprotein subunit, mitochondrial	SDHA_MOUSE	-2.15019	2.29123e-06	1.24087e-05	0.000377822
Q8BU33	Ilvbl	Acetolactate synthase-like protein	ILVBL_MOUSE	-inf	2.29254e-06	1.24087e-05	8.11085e-06
Q91YR7	Prpf6	Pre-mRNA-processing factor 6	PRP6_MOUSE	-inf	2.29355e-06	1.24087e-05	4.18461e-06
Q9JJ69	Kcnip2	Kv channel-interacting protein 2	KCIP2_MOUSE	-inf	2.30177e-06	1.24414e-05	1.58728e-05
Q3TFQ1	Spryd7	SPRY domain-containing protein 7	SPRY7_MOUSE	-inf	2.30835e-06	1.24632e-05	9.6152e-06
Q8BZQ7	Anapc2	Anaphase-promoting complex subunit 2	ANC2_MOUSE	-inf	2.31018e-06	1.24632e-05	4.5272e-06
P70288	Hdac2	Histone deacetylase 2	HDAC2_MOUSE	-inf	2.31622e-06	1.24839e-05	2.11774e-05
Q71RI9	Kyat3	Kynurenine--oxoglutarate transaminase 3	KAT3_MOUSE	-inf	2.3184e-06	1.24839e-05	3.91586e-05
Q9D6R2	Idh3a	Isocitrate dehydrogenase [NAD] subunit alpha, mitochondrial	IDH3A_MOUSE	-3.38449	2.32108e-06	1.24853e-05	0.00140421
Q91YL3	Uckl1	Uridine-cytidine kinase-like 1	UCKL1_MOUSE	-inf	2.32386e-06	1.24853e-05	4.78725e-06
Q9CQC6	Bzw1	Basic leucine zipper and W2 domain-containing protein 1	BZW1_MOUSE	-inf	2.32689e-06	1.24853e-05	2.02074e-05
Q91YP2	Nln	Neurolysin, mitochondrial	NEUL_MOUSE	-inf	2.32743e-06	1.24853e-05	1.95992e-05
Q9R088	Tk2	Thymidine kinase 2, mitochondrial	KITM_MOUSE	-inf	2.33218e-06	1.24949e-05	1.04164e-05
Q62084	Ppp1r14b	Protein phosphatase 1 regulatory subunit 14B	PP14B_MOUSE	-inf	2.33361e-06	1.24949e-05	2.88905e-06
Q62241	Snrpc	U1 small nuclear ribonucleoprotein C	RU1C_MOUSE	-inf	2.33932e-06	1.25108e-05	2.1579e-05
Q5XG73	Acbd5	Acyl-CoA-binding domain-containing protein 5	ACBD5_MOUSE	-inf	2.34097e-06	1.25108e-05	5.38176e-06
P97493	Txn2	Thioredoxin, mitochondrial	THIOM_MOUSE	-inf	2.34875e-06	1.25309e-05	6.09712e-05
O88291	Znf326	DBIRD complex subunit ZNF326	ZN326_MOUSE	-inf	2.34913e-06	1.25309e-05	9.75219e-06
Q8K3B1	Fbxo45	F-box/SPRY domain-containing protein 1	FBSP1_MOUSE	-inf	2.36667e-06	1.26104e-05	3.00026e-06
Q9CY34	Ube2f	NEDD8-conjugating enzyme UBE2F	UB2FA_MOUSE	-inf	2.3703e-06	1.26104e-05	7.64411e-06
Q9D1M4	Eef1e1	Eukaryotic translation elongation factor 1 epsilon-1	MCA3_MOUSE	-inf	2.37068e-06	1.26104e-05	4.74931e-06
Q9Z2S7	Tsc22d3	TSC22 domain family protein 3	T22D3_MOUSE	-inf	2.37825e-06	1.26201e-05	1.79258e-05
Q8BUY5	Timmdc1	Complex I assembly factor TIMMDC1, mitochondrial	TIDC1_MOUSE	-inf	2.37969e-06	1.26201e-05	6.38812e-06
Q8K070	Samd14	Sterile alpha motif domain-containing protein 14	SAM14_MOUSE	2.98177	2.3813e-06	1.26201e-05	3.305e-05
P85094	Isoc2a	Isochorismatase domain-containing protein 2A	ISC2A_MOUSE	-inf	2.38136e-06	1.26201e-05	3.74623e-05
Q6GV12	Kdsr	3-ketodihydrosphingosine reductase	KDSR_MOUSE	-inf	2.39398e-06	1.26752e-05	1.89454e-05
P70699	Gaa	Lysosomal alpha-glucosidase	LYAG_MOUSE	-inf	2.39995e-06	1.2695e-05	2.68461e-05
Q8K411	Pitrm1	Presequence protease, mitochondrial	PREP_MOUSE	-inf	2.40234e-06	1.26959e-05	1.49876e-05
Q9CQH7	Btf3l4	Transcription factor BTF3 homolog 4	BT3L4_MOUSE	-inf	2.41106e-06	1.27236e-05	2.85111e-05
Q5DU41	Lrrc8b	Volume-regulated anion channel subunit LRRC8B	LRC8B_MOUSE	-inf	2.41207e-06	1.27236e-05	2.25425e-06
Q9QXG4	Acss2	Acetyl-coenzyme A synthetase, cytoplasmic	ACSA_MOUSE	-inf	2.42353e-06	1.27652e-05	1.07431e-05
Q8VCM3	Zfyve21	Zinc finger FYVE domain-containing protein 21	ZFY21_MOUSE	-inf	2.42473e-06	1.27652e-05	1.85051e-06
Q9WVD5	Slc25a15	Mitochondrial ornithine transporter 1	ORNT1_MOUSE	-inf	2.42757e-06	1.27652e-05	4.1513e-06
Q922P9	Glyr1	Putative oxidoreductase GLYR1	GLYR1_MOUSE	-inf	2.42891e-06	1.27652e-05	6.6731e-06
Q9ERZ4	Chrm2	Muscarinic acetylcholine receptor M2	ACM2_MOUSE	-inf	2.43317e-06	1.27758e-05	1.02806e-06
Q69Z99	Znf512	Zinc finger protein 512	ZN512_MOUSE	-inf	2.44359e-06	1.28187e-05	6.53565e-06
P70205	Adcyap1r1	Pituitary adenylate cyclase-activating polypeptide type I receptor	PACR_MOUSE	-inf	2.45455e-06	1.28555e-05	1.59049e-05
P36993	Ppm1b	Protein phosphatase 1B	PPM1B_MOUSE	-inf	2.45512e-06	1.28555e-05	2.23113e-05
Q8BMA6	Srp68	Signal recognition particle subunit SRP68	SRP68_MOUSE	-inf	2.46188e-06	1.28791e-05	1.16441e-05
P14206	Rpsa	40S ribosomal protein SA	RSSA_MOUSE	-3.1394	2.46608e-06	1.28851e-05	0.000164474
Q9WU28	Pfdn5	Prefoldin subunit 5	PFD5_MOUSE	-inf	2.46755e-06	1.28851e-05	3.85767e-05
Q60575	Kif1b	Kinesin-like protein KIF1B	KIF1B_MOUSE	-inf	2.47188e-06	1.28898e-05	3.28014e-05
Q8BM65	Nyap2	Neuronal tyrosine-phosphorylated phosphoinositide-3-kinase adapter 2	NYAP2_MOUSE	3.47697	2.47297e-06	1.28898e-05	4.78849e-05
Q9D6F9	Tubb4a	Tubulin beta-4A chain	TBB4A_MOUSE	-2.23288	2.47894e-06	1.29006e-05	0.00114447
O89116	Vti1a	Vesicle transport through interaction with t-SNAREs homolog 1A	VTI1A_MOUSE	-inf	2.48231e-06	1.29006e-05	1.69491e-05
Q9EQI8	Mrpl46	39S ribosomal protein L46, mitochondrial	RM46_MOUSE	-inf	2.48293e-06	1.29006e-05	1.07301e-05
P0C0S8	H2AC11;H2afj;HIST1H2AC;HIST1H2AH;HIST1H2AJ;Hist2h2aa1;HIST2H2AA3;Hist2h2ac;HIST2H2AC	Histone H2A type 1;Histone H2A.J;Histone H2A type 1-C;Histone H2A type 1-H;Histone H2A type 1-J;Histone H2A type 2-A;Histone H2A type 2-A;Histone H2A type 2-C;Histone H2A type 2-C	H2A1_HUMAN;H2AJ_MOUSE;H2A1C_HUMAN;H2A1H_HUMAN;H2A1J_HUMAN;H2A2A_MOUSE;H2A2A_HUMAN;H2A2C_MOUSE;H2A2C_HUMAN	-inf	2.48564e-06	1.29006e-05	0.000235398
P52825	Cpt2	Carnitine O-palmitoyltransferase 2, mitochondrial	CPT2_MOUSE	-inf	2.48637e-06	1.29006e-05	1.64466e-05
Q7TMC8	Fcsk	L-fucose kinase	FCSK_MOUSE	-inf	2.49197e-06	1.2917e-05	9.33439e-06
Q9CQE2	Tmem223	Transmembrane protein 223	TM223_MOUSE	-inf	2.49407e-06	1.2917e-05	4.3786e-06
Q91W96	Anapc4	Anaphase-promoting complex subunit 4	APC4_MOUSE	-inf	2.52321e-06	1.30561e-05	3.8221e-06
Q9CX80	Cygb	Cytoglobin	CYGB_MOUSE	-inf	2.52862e-06	1.30722e-05	3.07344e-05
Q8C1Z7	Bbs4	Bardet-Biedl syndrome 4 protein homolog	BBS4_MOUSE	-inf	2.53417e-06	1.3089e-05	5.00374e-06
O55033	Nck2	Cytoplasmic protein NCK2	NCK2_MOUSE	-inf	2.53846e-06	1.30993e-05	1.55705e-05
Q9CQE1	Nipsnap3b	Protein NipSnap homolog 3B	NPS3B_MOUSE	-inf	2.54153e-06	1.31032e-05	1.87236e-05
P63056	Olfm3	Noelin-3	NOE3_MOUSE	-inf	2.55298e-06	1.31504e-05	3.05934e-06
A6H611	Mipep	Mitochondrial intermediate peptidase	MIPEP_MOUSE	-inf	2.5617e-06	1.31834e-05	1.07386e-05
Q9CQZ6	Ndufb3	NADH dehydrogenase [ubiquinone] 1 beta subcomplex subunit 3	NDUB3_MOUSE	-inf	2.5653e-06	1.319e-05	3.44351e-05
O35678	Mgll	Monoglyceride lipase	MGLL_MOUSE	-inf	2.56798e-06	1.31919e-05	5.11015e-05
Q8BUL6	Plekha1	Pleckstrin homology domain-containing family A member 1	PKHA1_MOUSE	2.33453	2.57695e-06	1.3226e-05	2.84667e-05
Q9CWD8	Nubpl	Iron-sulfur protein NUBPL	NUBPL_MOUSE	-inf	2.58452e-06	1.32529e-05	8.46582e-06
Q6P4T0	Atg2a	Autophagy-related protein 2 homolog A	ATG2A_MOUSE	-inf	2.58887e-06	1.32599e-05	2.58269e-06
Q80U57	Rims3	Regulating synaptic membrane exocytosis protein 3	RIMS3_MOUSE	-inf	2.59054e-06	1.32599e-05	4.43642e-06
Q9CQX5	Cldnd1	Claudin domain-containing protein 1	CLDN1_MOUSE	-inf	2.59603e-06	1.32761e-05	1.11401e-05
P07310	Ckm	Creatine kinase M-type	KCRM_MOUSE	-inf	2.60055e-06	1.32873e-05	3.22938e-05
Q9QZ73	Dcun1d1	DCN1-like protein 1	DCNL1_MOUSE	-inf	2.61313e-06	1.33385e-05	1.72285e-05
Q80ZJ1	Rap2a	Ras-related protein Rap-2a	RAP2A_MOUSE	1.00548	2.61525e-06	1.33385e-05	0.000277774
Q64012	Raly	RNA-binding protein Raly	RALY_MOUSE	-inf	2.63333e-06	1.34187e-05	2.07226e-05
Q6NZC7	Sec23ip	SEC23-interacting protein	S23IP_MOUSE	-inf	2.64131e-06	1.34473e-05	8.66117e-06
Q69Z26	Cntn4	Contactin-4	CNTN4_MOUSE	-inf	2.65481e-06	1.3504e-05	1.66141e-05
Q4KML4	Abracl	Costars family protein ABRACL	ABRAL_MOUSE	-inf	2.67875e-06	1.36136e-05	3.13721e-05
P84096	Rhog	Rho-related GTP-binding protein RhoG	RHOG_MOUSE	-2.1733	2.68841e-06	1.36505e-05	0.000244783
Q61626	Grik5	Glutamate receptor ionotropic, kainate 5	GRIK5_MOUSE	-inf	2.69972e-06	1.36957e-05	5.06309e-06
Q9ET80	Jph1	Junctophilin-1	JPH1_MOUSE	-inf	2.7036e-06	1.37032e-05	1.74398e-06
Q78J03	Msrb2	Methionine-R-sulfoxide reductase B2, mitochondrial	MSRB2_MOUSE	-inf	2.71209e-06	1.37259e-05	1.43116e-05
Q6A065	Cep170	Centrosomal protein of 170 kDa	CE170_MOUSE	2.47389	2.7129e-06	1.37259e-05	0.000143546
Q9D2P4	Urm1	Ubiquitin-related modifier 1	URM1_MOUSE	-inf	2.71689e-06	1.37338e-05	9.43383e-06
P25785	Timp2	Metalloproteinase inhibitor 2	TIMP2_MOUSE	-inf	2.71927e-06	1.37338e-05	3.14492e-06
Q6PFE7	Tmeff1	Tomoregulin-1	TEFF1_MOUSE	-inf	2.72435e-06	1.37472e-05	8.77148e-06
Q91ZW3	Smarca5	SWI/SNF-related matrix-associated actin-dependent regulator of chromatin subfamily A member 5	SMCA5_MOUSE	-inf	2.75093e-06	1.38562e-05	2.82506e-05
Q99L45	Eif2s2	Eukaryotic translation initiation factor 2 subunit 2	IF2B_MOUSE	-inf	2.75134e-06	1.38562e-05	4.03237e-05
Q62361	Trh	Pro-thyrotropin-releasing hormone	TRH_MOUSE	-inf	2.75323e-06	1.38562e-05	1.52942e-05
Q6PAV2	Herc4	Probable E3 ubiquitin-protein ligase HERC4	HERC4_MOUSE	-inf	2.76172e-06	1.38866e-05	1.16542e-05
Q8CFE4	Scyl2	SCY1-like protein 2	SCYL2_MOUSE	-inf	2.76739e-06	1.39028e-05	2.01899e-05
Q8BXV2	Bri3bp	BRI3-binding protein	BRI3B_MOUSE	-inf	2.77606e-06	1.3927e-05	1.4746e-05
Q8BGY7	Fam210a	Protein FAM210A	F210A_MOUSE	-inf	2.7771e-06	1.3927e-05	1.08598e-05
Q9CY18	Snx7	Sorting nexin-7	SNX7_MOUSE	-inf	2.78644e-06	1.39616e-05	6.33782e-06
Q8BXR9	Osbpl6	Oxysterol-binding protein-related protein 6	OSBL6_MOUSE	-inf	2.81057e-06	1.4045e-05	7.16202e-06
Q9CWG9	Bloc1s2	Biogenesis of lysosome-related organelles complex 1 subunit 2	BL1S2_MOUSE	-inf	2.81249e-06	1.4045e-05	8.27937e-06
Q811S7	Ubp1	Upstream-binding protein 1	UBIP1_MOUSE	-inf	2.81413e-06	1.4045e-05	2.87856e-06
Q9JMA2	Qtrt1	Queuine tRNA-ribosyltransferase catalytic subunit 1	TGT_MOUSE	-inf	2.81462e-06	1.4045e-05	5.45383e-05
Q8BTR5	Dusp28	Dual specificity phosphatase 28	DUS28_MOUSE	-inf	2.81751e-06	1.4045e-05	4.23012e-06
P18654	Rps6ka3	Ribosomal protein S6 kinase alpha-3	KS6A3_MOUSE	-inf	2.81789e-06	1.4045e-05	5.56131e-06
Q8CB44	Gramd4	GRAM domain-containing protein 4	GRAM4_MOUSE	-inf	2.83961e-06	1.4141e-05	2.76814e-06
Q99N93	Mrpl16	39S ribosomal protein L16, mitochondrial	RM16_MOUSE	-inf	2.84673e-06	1.4164e-05	8.8135e-06
Q5SRX1	Tom1l2	TOM1-like protein 2	TM1L2_MOUSE	2.19959	2.86402e-06	1.42376e-05	0.000529155
Q61469	Plpp1	Phospholipid phosphatase 1	PLPP1_MOUSE	-inf	2.87345e-06	1.42721e-05	7.49046e-06
P24638	Acp2	Lysosomal acid phosphatase	PPAL_MOUSE	-inf	2.88656e-06	1.43026e-05	2.40846e-05
Q91Y97	Aldob	Fructose-bisphosphate aldolase B	ALDOB_MOUSE	-inf	2.88881e-06	1.43026e-05	0.000169635
B2RQC6	Cad	CAD protein	PYR1_MOUSE	-inf	2.89085e-06	1.43026e-05	6.34677e-06
A2RSJ4	Uhrf1bp1l	UHRF1-binding protein 1-like	UH1BL_MOUSE	-inf	2.89134e-06	1.43026e-05	1.46983e-05
Q8BU30	Iars	Isoleucine--tRNA ligase, cytoplasmic	SYIC_MOUSE	-inf	2.89215e-06	1.43026e-05	2.04228e-05
Q62189	Snrpa	U1 small nuclear ribonucleoprotein A	SNRPA_MOUSE	-inf	2.89969e-06	1.43274e-05	4.94405e-05
B2RXC1	Trappc11	Trafficking protein particle complex subunit 11	TPC11_MOUSE	-inf	2.90222e-06	1.43275e-05	5.9348e-06
P58802	Tbc1d10a	TBC1 domain family member 10A	TB10A_MOUSE	-inf	2.91185e-06	1.43626e-05	4.75982e-06
Q9CYN2	Spcs2	Signal peptidase complex subunit 2	SPCS2_MOUSE	-inf	2.91944e-06	1.43876e-05	1.303e-05
Q80SY5	Prpf38b	Pre-mRNA-splicing factor 38B	PR38B_MOUSE	-inf	2.92269e-06	1.43911e-05	2.47051e-06
Q920P5	Ak5	Adenylate kinase isoenzyme 5	KAD5_MOUSE	-inf	2.93782e-06	1.44466e-05	1.3977e-05
O35286	Dhx15	Pre-mRNA-splicing factor ATP-dependent RNA helicase DHX15	DHX15_MOUSE	-inf	2.93903e-06	1.44466e-05	2.89855e-05
Q8VDL4	Adpgk	ADP-dependent glucokinase	ADPGK_MOUSE	-inf	2.94317e-06	1.44509e-05	3.24638e-06
Q8K406	Lgi3	Leucine-rich repeat LGI family member 3	LGI3_MOUSE	-inf	2.94734e-06	1.44509e-05	2.43992e-05
O09174	Amacr	Alpha-methylacyl-CoA racemase	AMACR_MOUSE	-inf	2.94751e-06	1.44509e-05	2.17001e-05
P62838	Ube2d2;Ube2d3	Ubiquitin-conjugating enzyme E2 D2;Ubiquitin-conjugating enzyme E2 D3	UB2D2_MOUSE;UB2D3_MOUSE	-inf	2.96182e-06	1.45017e-05	8.93681e-05
Q9D113	Dnlz	DNL-type zinc finger protein	DNLZ_MOUSE	-inf	2.96308e-06	1.45017e-05	1.25461e-05
Q8BYM8	Cars2	Probable cysteine--tRNA ligase, mitochondrial	SYCM_MOUSE	-inf	2.9655e-06	1.45017e-05	7.4272e-06
O70400	Pdlim1	PDZ and LIM domain protein 1	PDLI1_MOUSE	-inf	2.97308e-06	1.45263e-05	4.05023e-06
Q8VE22	Mrps23	28S ribosomal protein S23, mitochondrial	RT23_MOUSE	-inf	2.98041e-06	1.45496e-05	9.25191e-06
Q61733	Mrps31	28S ribosomal protein S31, mitochondrial	RT31_MOUSE	-inf	3.01755e-06	1.47183e-05	7.80028e-06
Q6P3D0	Nudt16	U8 snoRNA-decapping enzyme	NUD16_MOUSE	-inf	3.0223e-06	1.4722e-05	1.68578e-05
O70433	Fhl2	Four and a half LIM domains protein 2	FHL2_MOUSE	-inf	3.02637e-06	1.4722e-05	2.91526e-06
P06797	Ctsl	Cathepsin L1	CATL1_MOUSE	-inf	3.02729e-06	1.4722e-05	1.50484e-05
Q60928	Ggt1	Glutathione hydrolase 1 proenzyme	GGT1_MOUSE	-inf	3.0294e-06	1.4722e-05	5.83509e-06
A2AP18	Plch2	1-phosphatidylinositol 4,5-bisphosphate phosphodiesterase eta-2	PLCH2_MOUSE	-inf	3.03123e-06	1.4722e-05	2.36105e-05
Q62092	Nsg1	Neuronal vesicle trafficking-associated protein 1	NSG1_MOUSE	-inf	3.04206e-06	1.4762e-05	4.53788e-06
Q921G8	Tubgcp2	Gamma-tubulin complex component 2	GCP2_MOUSE	-inf	3.04904e-06	1.4771e-05	5.16175e-06
Q80TQ5	Plekhm2	Pleckstrin homology domain-containing family M member 2	PKHM2_MOUSE	-inf	3.04909e-06	1.4771e-05	1.00431e-06
Q924S8	Spred1	Sprouty-related, EVH1 domain-containing protein 1	SPRE1_MOUSE	-inf	3.05192e-06	1.47721e-05	8.53556e-06
P63216	Gng3	Guanine nucleotide-binding protein G(I)/G(S)/G(O) subunit gamma-3	GBG3_MOUSE	-1.38643	3.05566e-06	1.47777e-05	0.000329231
Q9ERF3	Wdr61	WD repeat-containing protein 61	WDR61_MOUSE	-inf	3.05901e-06	1.47813e-05	5.66293e-06
Q9CQP2	Trappc2;TRAPPC2	Trafficking protein particle complex subunit 2	TPPC2_MOUSE;TPPC2_PIG	-inf	3.06563e-06	1.48008e-05	1.41586e-05
Q99JB8	Pacsin3	Protein kinase C and casein kinase II substrate protein 3	PACN3_MOUSE	-inf	3.07199e-06	1.48137e-05	9.80824e-06
Q8BKV0	Spock3	Testican-3	TICN3_MOUSE	-inf	3.07352e-06	1.48137e-05	1.69522e-06
Q6RHR9	Magi1	Membrane-associated guanylate kinase, WW and PDZ domain-containing protein 1	MAGI1_MOUSE	4.34351	3.08645e-06	1.4856e-05	0.000255298
Q922Y1	Ubxn1	UBX domain-containing protein 1	UBXN1_MOUSE	-inf	3.0891e-06	1.4856e-05	1.62794e-05
P54071	Idh2	Isocitrate dehydrogenase [NADP], mitochondrial	IDHP_MOUSE	-1.9696	3.09189e-06	1.4856e-05	0.000256271
P59913	Pcmtd1	Protein-L-isoaspartate O-methyltransferase domain-containing protein 1	PCMD1_MOUSE	-inf	3.09273e-06	1.4856e-05	6.73625e-06
P63158	Hmgb1;HMGB1,HMGB1	High mobility group protein B1;High mobility group B protein 1,High mobility group protein B1	HMGB1_MOUSE;HMGB1_ARATH,HMGB1_HUMAN	-inf	3.1025e-06	1.48904e-05	8.88073e-05
Q9DCT8	Crip2	Cysteine-rich protein 2	CRIP2_MOUSE	1.47926	3.1079e-06	1.49038e-05	0.000594448
P97347	Rptn	Repetin	RPTN_MOUSE	-inf	3.11332e-06	1.4907e-05	2.38564e-05
O35972	Mrpl23	39S ribosomal protein L23, mitochondrial	RM23_MOUSE	-inf	3.1138e-06	1.4907e-05	6.64553e-06
B2RUJ5	Apba1	Amyloid-beta A4 precursor protein-binding family A member 1	APBA1_MOUSE	4.20335	3.12811e-06	1.49629e-05	0.000674517
Q9CRB0	Snx24	Sorting nexin-24	SNX24_MOUSE	-inf	3.1316e-06	1.4967e-05	2.36573e-06
O70174	Chrna4	Neuronal acetylcholine receptor subunit alpha-4	ACHA4_MOUSE	4.61676	3.13835e-06	1.49867e-05	5.18081e-05
Q2M3X8	Phactr1	Phosphatase and actin regulator 1	PHAR1_MOUSE	-inf	3.14117e-06	1.49877e-05	0.000143268
Q0GA42	Cnnm1	Metal transporter CNNM1	CNNM1_MOUSE	-inf	3.15682e-06	1.50497e-05	7.07682e-06
Q6PFD9	Nup98	Nuclear pore complex protein Nup98-Nup96	NUP98_MOUSE	-inf	3.16025e-06	1.50535e-05	4.64433e-06
Q9WVR4	Fxr2	Fragile X mental retardation syndrome-related protein 2	FXR2_MOUSE	-inf	3.18065e-06	1.5138e-05	1.67119e-05
O89026	Robo1	Roundabout homolog 1	ROBO1_MOUSE	3.9922	3.21194e-06	1.52701e-05	7.50446e-05
Q920Q4	Vps16	Vacuolar protein sorting-associated protein 16 homolog	VPS16_MOUSE	-inf	3.21376e-06	1.52701e-05	9.63434e-06
Q8R3P0	Aspa	Aspartoacylase	ACY2_MOUSE	-inf	3.21708e-06	1.52731e-05	4.80602e-05
Q3V0G7	Garnl3	GTPase-activating Rap/Ran-GAP domain-like protein 3	GARL3_MOUSE	-inf	3.22519e-06	1.52988e-05	4.50646e-06
P83510	Tnik	Traf2 and NCK-interacting protein kinase	TNIK_MOUSE	-inf	3.23208e-06	1.53165e-05	2.83683e-05
Q9JME5	Ap3b2	AP-3 complex subunit beta-2	AP3B2_MOUSE	1.83189	3.2343e-06	1.53165e-05	0.000527773
Q6PDI5	Ecpas	Proteasome adapter and scaffold protein ECM29	ECM29_MOUSE	-inf	3.25025e-06	1.53793e-05	1.19732e-05
O35685	Nudc	Nuclear migration protein nudC	NUDC_MOUSE	-inf	3.26383e-06	1.54307e-05	6.24747e-05
Q8BZ60	Ston2	Stonin-2	STON2_MOUSE	-inf	3.26859e-06	1.54404e-05	3.52187e-06
O70481	Ubr1	E3 ubiquitin-protein ligase UBR1	UBR1_MOUSE	-inf	3.28688e-06	1.55139e-05	7.93697e-06
Q9DBZ5	Eif3k	Eukaryotic translation initiation factor 3 subunit K	EIF3K_MOUSE	-inf	3.29592e-06	1.55438e-05	2.15095e-05
Q9QZH6	Ecsit	Evolutionarily conserved signaling intermediate in Toll pathway, mitochondrial	ECSIT_MOUSE	-inf	3.30747e-06	1.55656e-05	1.0085e-05
Q3V3R4	Itga1	Integrin alpha-1	ITA1_MOUSE	-inf	3.30824e-06	1.55656e-05	4.46088e-06
P61922	Abat	4-aminobutyrate aminotransferase, mitochondrial	GABT_MOUSE	-3.13508	3.31076e-06	1.55656e-05	0.00114122
Q9JIG4	Ppp1r3f	Protein phosphatase 1 regulatory subunit 3F	PPR3F_MOUSE	-inf	3.31148e-06	1.55656e-05	7.19865e-06
Q91Y20	Pcdha10;Pcdha4;Pcdha7	Protocadherin alpha-10;Protocadherin alpha-4;Protocadherin alpha-7	PCDAA_MOUSE;PCDA4_MOUSE;PCDA7_MOUSE	-inf	3.31774e-06	1.557e-05	2.15222e-06
Q9D2N9	Vps33a	Vacuolar protein sorting-associated protein 33A	VP33A_MOUSE	-inf	3.31855e-06	1.557e-05	1.59879e-05
P97807	Fh	Fumarate hydratase, mitochondrial	FUMH_MOUSE	-2.92464	3.32062e-06	1.557e-05	0.000269522
P58137	Acot8	Acyl-coenzyme A thioesterase 8	ACOT8_MOUSE	-inf	3.33863e-06	1.56328e-05	2.76863e-06
Q8BGH7	Cdc42se2	CDC42 small effector protein 2	C42S2_MOUSE	-inf	3.34073e-06	1.56328e-05	1.25522e-05
A2BDX3	Mocs3	Adenylyltransferase and sulfurtransferase MOCS3	MOCS3_MOUSE	-inf	3.34224e-06	1.56328e-05	0.000126837
Q05A62	Dnal1	Dynein light chain 1, axonemal	DNAL1_MOUSE	-inf	3.34751e-06	1.56446e-05	1.26344e-05
Q8R1T1	Chmp7	Charged multivesicular body protein 7	CHMP7_MOUSE	2.89498	3.35334e-06	1.5659e-05	0.000102719
Q923M0	Ppp1r16a	Protein phosphatase 1 regulatory subunit 16A	PP16A_MOUSE	-inf	3.36607e-06	1.56859e-05	5.10792e-06
O35598	Adam10	Disintegrin and metalloproteinase domain-containing protein 10	ADA10_MOUSE	-inf	3.36653e-06	1.56859e-05	1.77291e-05
Q9Z1E4	Gys1	Glycogen [starch] synthase, muscle	GYS1_MOUSE	-inf	3.36737e-06	1.56859e-05	3.09106e-06
Q922Q9	Chid1	Chitinase domain-containing protein 1	CHID1_MOUSE	-inf	3.37798e-06	1.57225e-05	7.0931e-06
O70585	Dtnb	Dystrobrevin beta	DTNB_MOUSE	-inf	3.38205e-06	1.57286e-05	1.89471e-05
Q99JW4	Lims1	LIM and senescent cell antigen-like-containing domain protein 1	LIMS1_MOUSE	-inf	3.38551e-06	1.57319e-05	6.62925e-06
Q61627	Grid1	Glutamate receptor ionotropic, delta-1	GRID1_MOUSE	-inf	3.3902e-06	1.57408e-05	7.38934e-06
P23116	Eif3a	Eukaryotic translation initiation factor 3 subunit A	EIF3A_MOUSE	-inf	3.3981e-06	1.57647e-05	2.475e-05
Q811C2	Atg4c	Cysteine protease ATG4C	ATG4C_MOUSE	-inf	3.4059e-06	1.5788e-05	4.3262e-06
P0C7M9	Clec2l	C-type lectin domain family 2 member L	CLC2L_MOUSE	-inf	3.41472e-06	1.5816e-05	1.82263e-05
Q5ND34	Wdr81	WD repeat-containing protein 81	WDR81_MOUSE	-inf	3.42703e-06	1.58556e-05	2.02389e-06
Q9WUU7	Ctsz	Cathepsin Z	CATZ_MOUSE	-inf	3.42885e-06	1.58556e-05	8.07883e-06
Q11136	Pepd	Xaa-Pro dipeptidase	PEPD_MOUSE	-1.33821	3.43603e-06	1.58717e-05	4.60034e-05
Q9DAM5	Slc25a19	Mitochondrial thiamine pyrophosphate carrier	TPC_MOUSE	-inf	3.43788e-06	1.58717e-05	3.31974e-06
Q05915	Gch1	GTP cyclohydrolase 1	GCH1_MOUSE	5.45701	3.4517e-06	1.59225e-05	3.30873e-05
P16675	Ctsa	Lysosomal protective protein	PPGB_MOUSE	-inf	3.45843e-06	1.59407e-05	8.76436e-06
Q9QZD9	Eif3i	Eukaryotic translation initiation factor 3 subunit I	EIF3I_MOUSE	-2.51909	3.4663e-06	1.5964e-05	2.20222e-05
Q00899	Yy1	Transcriptional repressor protein YY1	TYY1_MOUSE	-inf	3.47097e-06	1.59726e-05	1.62664e-06
Q9CPT3	Nanp	N-acylneuraminate-9-phosphatase	NANP_MOUSE	-inf	3.48256e-06	1.6013e-05	4.23697e-06
Q8BU14	Sec62	Translocation protein SEC62	SEC62_MOUSE	-inf	3.48739e-06	1.60223e-05	1.68338e-05
Q99LD9	Eif2b2	Translation initiation factor eIF-2B subunit beta	EI2BB_MOUSE	-inf	3.50447e-06	1.60877e-05	8.21809e-06
P24457	Cyp2d11	Cytochrome P450 2D11	CP2DB_MOUSE	-inf	3.50727e-06	1.60877e-05	1.17177e-05
Q99L88	Sntb1	Beta-1-syntrophin	SNTB1_MOUSE	-inf	3.51297e-06	1.6088e-05	6.20215e-06
O70293	Grk6	G protein-coupled receptor kinase 6	GRK6_MOUSE	-inf	3.51298e-06	1.6088e-05	5.8257e-06
P11531	Dmd	Dystrophin	DMD_MOUSE	-inf	3.5322e-06	1.6163e-05	6.17065e-06
Q91VC7	Ppp1r14a	Protein phosphatase 1 regulatory subunit 14A	PP14A_MOUSE	-inf	3.53829e-06	1.61779e-05	2.28681e-05
Q9Z1S3	Rasgrp1	RAS guanyl-releasing protein 1	GRP1_MOUSE	-inf	3.55161e-06	1.62258e-05	2.02922e-06
P22682	Cbl	E3 ubiquitin-protein ligase CBL	CBL_MOUSE	1.98581	3.55589e-06	1.62323e-05	3.78611e-05
Q8BJZ4	Mrps35	28S ribosomal protein S35, mitochondrial	RT35_MOUSE	-inf	3.55933e-06	1.6235e-05	8.1323e-06
Q9DC53	Cpne8	Copine-8	CPNE8_MOUSE	-inf	3.57743e-06	1.63045e-05	5.76134e-06
Q9CQP3	Chchd5	Coiled-coil-helix-coiled-coil-helix domain-containing protein 5	CHCH5_MOUSE	-inf	3.58278e-06	1.63158e-05	3.49423e-06
Q9R069	Bcam	Basal cell adhesion molecule	BCAM_MOUSE	-inf	3.60114e-06	1.63821e-05	1.48566e-05
O35166	Gosr2	Golgi SNAP receptor complex member 2	GOSR2_MOUSE	-inf	3.60673e-06	1.63821e-05	5.94946e-06
P23780	Glb1	Beta-galactosidase	BGAL_MOUSE	-inf	3.60731e-06	1.63821e-05	5.00861e-06
Q99JX3	Gorasp2	Golgi reassembly-stacking protein 2	GORS2_MOUSE	-inf	3.60884e-06	1.63821e-05	3.24294e-05
Q9D2G2	Dlst	Dihydrolipoyllysine-residue succinyltransferase component of 2-oxoglutarate dehydrogenase complex, mitochondrial	ODO2_MOUSE	-4.11648	3.63113e-06	1.64612e-05	0.000716348
Q8CA71	Shisa4	Protein shisa-4	SHSA4_MOUSE	-inf	3.63203e-06	1.64612e-05	4.84288e-05
Q3UE37	Ube2z	Ubiquitin-conjugating enzyme E2 Z	UBE2Z_MOUSE	-inf	3.63674e-06	1.64694e-05	2.53388e-05
Q8C3X4	Guf1	Translation factor Guf1, mitochondrial	GUF1_MOUSE	-inf	3.647e-06	1.65027e-05	2.85832e-06
Q63850	Nup62	Nuclear pore glycoprotein p62	NUP62_MOUSE	-inf	3.65565e-06	1.65288e-05	6.88074e-06
Q9D4V0	Etnk1	Ethanolamine kinase 1	EKI1_MOUSE	-inf	3.66167e-06	1.65423e-05	6.37207e-06
Q9DC71	Mrps15	28S ribosomal protein S15, mitochondrial	RT15_MOUSE	-inf	3.66445e-06	1.65423e-05	1.8307e-05
O08709	Prdx6	Peroxiredoxin-6	PRDX6_MOUSE	-1.60391	3.6695e-06	1.65513e-05	0.000994628
Q9DAW9	Cnn3	Calponin-3	CNN3_MOUSE	2.54521	3.67397e-06	1.65513e-05	0.000171399
P17225	Ptbp1	Polypyrimidine tract-binding protein 1	PTBP1_MOUSE	-inf	3.67515e-06	1.65513e-05	5.14852e-06
O55028	Bckdk	[3-methyl-2-oxobutanoate dehydrogenase [lipoamide]] kinase, mitochondrial	BCKD_MOUSE	-inf	3.67912e-06	1.6556e-05	1.0679e-05
Q9D9S3	Rwdd2a	RWD domain-containing protein 2A	RWD2A_MOUSE	-inf	3.68516e-06	1.65701e-05	1.53072e-06
O08583	Alyref	THO complex subunit 4	THOC4_MOUSE	-inf	3.69257e-06	1.65903e-05	3.43997e-05
Q9JLJ0	Litaf	Lipopolysaccharide-induced tumor necrosis factor-alpha factor homolog	LITAF_MOUSE	-inf	3.69658e-06	1.65953e-05	1.40753e-05
P47955	Rplp1	60S acidic ribosomal protein P1	RLA1_MOUSE	-inf	3.70227e-06	1.66077e-05	3.81022e-05
P23591	Tsta3	GDP-L-fucose synthase	FCL_MOUSE	-inf	3.7222e-06	1.6684e-05	1.46678e-05
Q80ZD8	Amigo1	Amphoterin-induced protein 1	AMGO1_MOUSE	-inf	3.74674e-06	1.67808e-05	4.35372e-06
Q9CR84	Atp5mc1;Atp5mc2;Atp5mc3	ATP synthase F(0) complex subunit C1, mitochondrial;ATP synthase F(0) complex subunit C2, mitochondrial;ATP synthase F(0) complex subunit C3, mitochondrial	AT5G1_MOUSE;AT5G2_MOUSE;AT5G3_MOUSE	-inf	3.75739e-06	1.68094e-05	0.00108603
P30275	Ckmt1	Creatine kinase U-type, mitochondrial	KCRU_MOUSE	-2.34224	3.75903e-06	1.68094e-05	0.00150824
Q8R4R6	Nup35	Nucleoporin NUP35	NUP35_MOUSE	-inf	3.76519e-06	1.68133e-05	5.685e-06
Q99L13	Hibadh	3-hydroxyisobutyrate dehydrogenase, mitochondrial	3HIDH_MOUSE	-2.93285	3.7658e-06	1.68133e-05	0.000141735
Q8CJH3	Plxnb1	Plexin-B1	PLXB1_MOUSE	-inf	3.77358e-06	1.68348e-05	1.53836e-05
P70404	Idh3g	Isocitrate dehydrogenase [NAD] subunit gamma 1, mitochondrial,Isocitrate dehydrogenase [NAD] subunit gamma 1, mitochondrial	IDHG1_MOUSE	-2.72672	3.78575e-06	1.68759e-05	0.000316384
Q61937	Npm1	Nucleophosmin	NPM_MOUSE	-1.39462	3.79299e-06	1.68802e-05	0.000135512
Q8BV13	Cops7b	COP9 signalosome complex subunit 7b	CSN7B_MOUSE	-inf	3.79533e-06	1.68802e-05	1.2273e-05
Q99KR6	Rnf34	E3 ubiquitin-protein ligase RNF34	RNF34_MOUSE	-inf	3.7956e-06	1.68802e-05	2.95299e-06
Q80ZK0	Mrps10	28S ribosomal protein S10, mitochondrial	RT10_MOUSE	-inf	3.7986e-06	1.68804e-05	5.89808e-06
Q8CJG0	Ago2	Protein argonaute-2	AGO2_MOUSE	-inf	3.82184e-06	1.69631e-05	1.10982e-05
Q61391	Mme	Neprilysin	NEP_MOUSE	-inf	3.82355e-06	1.69631e-05	6.43986e-06
P40630	Tfam	Transcription factor A, mitochondrial	TFAM_MOUSE	-inf	3.82616e-06	1.69631e-05	5.34956e-05
Q5SVR0	Tbc1d9b	TBC1 domain family member 9B	TBC9B_MOUSE	-inf	3.83937e-06	1.70001e-05	6.5347e-06
O08967	Cyth3	Cytohesin-3	CYH3_MOUSE	-inf	3.84046e-06	1.70001e-05	1.91871e-05
Q6W8Q3	Pcp4l1	Purkinje cell protein 4-like protein 1	PC4L1_MOUSE	-5.09398	3.85476e-06	1.70501e-05	0.000223
P06745	Gpi	Glucose-6-phosphate isomerase	G6PI_MOUSE	-2.49635	3.8677e-06	1.70941e-05	0.000995386
Q9EPU5	Tnfrsf21	Tumor necrosis factor receptor superfamily member 21	TNR21_MOUSE	-inf	3.89519e-06	1.72022e-05	2.74764e-06
Q8VCC9	Spon1	Spondin-1	SPON1_MOUSE	-inf	3.91986e-06	1.72978e-05	2.39061e-05
Q9JHS4	Clpx;CLPX	ATP-dependent Clp protease ATP-binding subunit clpX-like, mitochondrial;ATP-dependent Clp protease ATP-binding subunit clpX-like, mitochondrial	CLPX_MOUSE;CLPX_HUMAN	-inf	3.93323e-06	1.73434e-05	3.957e-06
Q6ZWR6	Syne1	Nesprin-1	SYNE1_MOUSE	-inf	3.95952e-06	1.74458e-05	2.00081e-05
Q63918	Cavin2	Caveolae-associated protein 2	CAVN2_MOUSE	-inf	3.96356e-06	1.74501e-05	2.98575e-06
P70452	Stx4	Syntaxin-4	STX4_MOUSE	-inf	3.96697e-06	1.74516e-05	7.89466e-06
P61080	Ube2d1	Ubiquitin-conjugating enzyme E2 D1	UB2D1_MOUSE	-inf	3.97558e-06	1.7476e-05	3.37513e-05
O08740	Polr2j	DNA-directed RNA polymerase II subunit RPB11	RPB11_MOUSE	-inf	3.98069e-06	1.74849e-05	3.65841e-06
P47867	Scg3	Secretogranin-3	SCG3_MOUSE	-inf	3.99051e-06	1.75146e-05	1.20158e-05
Q02357	Ank1	Ankyrin-1	ANK1_MOUSE	3.54009	3.99575e-06	1.75241e-05	0.000141333
Q6P2L7	Casc4	Protein CASC4	CASC4_MOUSE	-inf	4.00091e-06	1.75263e-05	2.53945e-06
P63034	Cyth2	Cytohesin-2	CYH2_MOUSE	-inf	4.00241e-06	1.75263e-05	1.88627e-05
A6H630	Armt1	Damage-control phosphatase ARMT1	ARMT1_MOUSE	-inf	4.01731e-06	1.75781e-05	1.71633e-05
Q9DCH4	Eif3f	Eukaryotic translation initiation factor 3 subunit F	EIF3F_MOUSE	-inf	4.02746e-06	1.76089e-05	3.1262e-05
Q8K2F0	Brd3;Brd4	Bromodomain-containing protein 3;Bromodomain-containing protein 4	BRD3_MOUSE;BRD4_MOUSE	-inf	4.07348e-06	1.77857e-05	5.83081e-06
F7BWT7	Tspan15	Tetraspanin-15	TSN15_MOUSE	-inf	4.07414e-06	1.77857e-05	4.50361e-06
Q8BJW6	Eif2a	Eukaryotic translation initiation factor 2A	EIF2A_MOUSE	-inf	4.08112e-06	1.77897e-05	9.14141e-06
Q8BXT1	Rgs8	Regulator of G-protein signaling 8	RGS8_MOUSE	-inf	4.08129e-06	1.77897e-05	1.98994e-05
Q61327	Slc6a3	Sodium-dependent dopamine transporter	SC6A3_MOUSE	2.93637	4.09024e-06	1.78067e-05	0.00142955
P46097	Syt2	Synaptotagmin-2	SYT2_MOUSE	-inf	4.09144e-06	1.78067e-05	3.76656e-05
P09240	Cck	Cholecystokinin	CCKN_MOUSE	-inf	4.09507e-06	1.78089e-05	3.78371e-05
Q64455	Ptprj	Receptor-type tyrosine-protein phosphatase eta	PTPRJ_MOUSE	-inf	4.09988e-06	1.78162e-05	6.48712e-06
D3YXK2	Safb	Scaffold attachment factor B1	SAFB1_MOUSE	-inf	4.11786e-06	1.78679e-05	2.87231e-05
O35710	Noct	Nocturnin	NOCT_MOUSE	-inf	4.11805e-06	1.78679e-05	4.60911e-06
Q9CYK1	Wars2	Tryptophan--tRNA ligase, mitochondrial	SYWM_MOUSE	-inf	4.14107e-06	1.79422e-05	6.47764e-06
P47212	Gal	Galanin peptides	GALA_MOUSE	-inf	4.14147e-06	1.79422e-05	1.4087e-05
Q8C0L9	Gpcpd1	Glycerophosphocholine phosphodiesterase GPCPD1	GPCP1_MOUSE	-inf	4.14724e-06	1.79535e-05	1.17174e-05
Q99KK9	Hars2	Probable histidine--tRNA ligase, mitochondrial	SYHM_MOUSE	-inf	4.16967e-06	1.80361e-05	6.44562e-06
P14869	Rplp0	60S acidic ribosomal protein P0	RLA0_MOUSE	-3.60495	4.17579e-06	1.80361e-05	0.000107489
Q8CFV9	Rfk	Riboflavin kinase	RIFK_MOUSE	-inf	4.17581e-06	1.80361e-05	1.19924e-05
Q8C6G8	Wdr26	WD repeat-containing protein 26	WDR26_MOUSE	-inf	4.19323e-06	1.80884e-05	6.63086e-06
Q9CR88	Mrps14	28S ribosomal protein S14, mitochondrial	RT14_MOUSE	-inf	4.19703e-06	1.80884e-05	2.76673e-06
Q61292	Lamb2	Laminin subunit beta-2	LAMB2_MOUSE	-inf	4.19878e-06	1.80884e-05	2.75199e-05
Q6ZQ08	Cnot1;CNOT1	CCR4-NOT transcription complex subunit 1	CNOT1_MOUSE;CNOT1_HUMAN	-inf	4.20063e-06	1.80884e-05	1.02965e-05
Q8BGR8	Gskip	GSK3B-interacting protein	GSKIP_MOUSE	-inf	4.21465e-06	1.81351e-05	6.82615e-06
Q3UVG3	Fam91a1	Protein FAM91A1	F91A1_MOUSE	-inf	4.22124e-06	1.81497e-05	4.98928e-06
B1AZI6	Thoc2	THO complex subunit 2	THOC2_MOUSE	-inf	4.2412e-06	1.82218e-05	2.14196e-06
Q3UFY7	Nt5c3b	7-methylguanosine phosphate-specific 5'-nucleotidase	5NT3B_MOUSE	-inf	4.25327e-06	1.82599e-05	7.02721e-06
Q8VHN8	Nudt16l1	Tudor-interacting repair regulator protein	TIRR_MOUSE	-inf	4.26102e-06	1.82794e-05	5.37733e-06
Q566J8	Coq8b	Atypical kinase COQ8B, mitochondrial	COQ8B_MOUSE	-inf	4.27594e-06	1.83296e-05	2.96945e-06
Q3U2V3	Nudt18	8-oxo-dGDP phosphatase NUDT18	NUD18_MOUSE	-inf	4.28146e-06	1.83394e-05	3.31792e-06
Q3UHE1	Pitpnm3	Membrane-associated phosphatidylinositol transfer protein 3	PITM3_MOUSE	-inf	4.29041e-06	1.83577e-05	4.03592e-06
P10493	Nid1	Nidogen-1	NID1_MOUSE	-inf	4.29335e-06	1.83577e-05	2.07661e-05
Q8C079	Strip1	Striatin-interacting protein 1	STRP1_MOUSE	-inf	4.29539e-06	1.83577e-05	3.03169e-05
P98156	Vldlr	Very low-density lipoprotein receptor	VLDLR_MOUSE	-inf	4.30402e-06	1.83808e-05	4.2002e-06
Q9WU78	Pdcd6ip	Programmed cell death 6-interacting protein	PDC6I_MOUSE	3.30141	4.34576e-06	1.8541e-05	0.000584679
Q9D415	Dlgap1	Disks large-associated protein 1	DLGP1_MOUSE	-inf	4.34805e-06	1.8541e-05	1.13635e-05
Q9DBR2	Fam13c	Protein FAM13C	FA13C_MOUSE	-inf	4.35201e-06	1.8544e-05	2.4438e-06
Q80XR2	Atp2c1	Calcium-transporting ATPase type 2C member 1	AT2C1_MOUSE	-inf	4.36145e-06	1.85704e-05	6.62048e-06
Q501J6	Ddx17	Probable ATP-dependent RNA helicase DDX17	DDX17_MOUSE	-3.18473	4.36771e-06	1.85831e-05	0.000113365
Q80Y24	Prickle2	Prickle-like protein 2	PRIC2_MOUSE	-inf	4.38045e-06	1.86203e-05	1.70074e-05
Q9QXM1	Jmy	Junction-mediating and -regulatory protein	JMY_MOUSE	-inf	4.38297e-06	1.86203e-05	3.20374e-06
Q80U35	Arhgef17	Rho guanine nucleotide exchange factor 17	ARHGH_MOUSE	-inf	4.39738e-06	1.86676e-05	3.5299e-06
Q05BC3	Eml1	Echinoderm microtubule-associated protein-like 1	EMAL1_MOUSE	-inf	4.40119e-06	1.86689e-05	1.83207e-05
Q9JJV5	Cacng3	Voltage-dependent calcium channel gamma-3 subunit	CCG3_MOUSE	-inf	4.40425e-06	1.86689e-05	3.18437e-05
Q91ZF0	Dnajc24	DnaJ homolog subfamily C member 24	DJC24_MOUSE	-inf	4.41563e-06	1.87032e-05	3.3715e-06
Q6P9Z1	Smarcd3	SWI/SNF-related matrix-associated actin-dependent regulator of chromatin subfamily D member 3	SMRD3_MOUSE	-inf	4.42361e-06	1.87094e-05	2.73548e-06
Q99LE6	Abcf2	ATP-binding cassette sub-family F member 2	ABCF2_MOUSE	-inf	4.42366e-06	1.87094e-05	1.42714e-05
Q8CHX7	Rftn2	Raftlin-2	RFTN2_MOUSE	-inf	4.42817e-06	1.87146e-05	1.24158e-05
Q8R2Q4	Gfm2	Ribosome-releasing factor 2, mitochondrial	RRF2M_MOUSE	-inf	4.44006e-06	1.8751e-05	2.94844e-06
Q61730	Il1rap	Interleukin-1 receptor accessory protein	IL1AP_MOUSE	-inf	4.48995e-06	1.89476e-05	7.59737e-06
Q8VDZ4	Zdhhc5	Palmitoyltransferase ZDHHC5	ZDHC5_MOUSE	2.75232	4.5019e-06	1.8984e-05	6.06213e-05
Q8BZW8	Nhlrc2	NHL repeat-containing protein 2	NHLC2_MOUSE	-inf	4.50719e-06	1.89922e-05	7.1368e-06
Q91WG4	Elp2	Elongator complex protein 2	ELP2_MOUSE	-inf	4.52093e-06	1.90231e-05	5.7177e-06
Q99MS8	Tpgs1	Tubulin polyglutamylase complex subunit 1	TPGS1_MOUSE	-inf	4.52146e-06	1.90231e-05	3.39225e-06
Q61214	Dyrk1a	Dual specificity tyrosine-phosphorylation-regulated kinase 1A	DYR1A_MOUSE	-inf	4.52818e-06	1.90231e-05	3.84788e-06
Q9QZI9	Serinc3	Serine incorporator 3	SERC3_MOUSE	-inf	4.53262e-06	1.90231e-05	1.94865e-05
B1AVZ0	Uprt	Uracil phosphoribosyltransferase homolog	UPP_MOUSE	-inf	4.53422e-06	1.90231e-05	5.98881e-06
P16014	Chgb	Secretogranin-1	SCG1_MOUSE	-inf	4.53724e-06	1.90231e-05	1.56694e-05
Q8VE37	Rcc1	Regulator of chromosome condensation	RCC1_MOUSE	-inf	4.54164e-06	1.90231e-05	1.28637e-05
P97434	Mprip	Myosin phosphatase Rho-interacting protein	MPRIP_MOUSE	-inf	4.54349e-06	1.90231e-05	7.27192e-06
E9Q6B2	Ccdc85c	Coiled-coil domain-containing protein 85C	CC85C_MOUSE	-inf	4.54458e-06	1.90231e-05	7.10732e-06
Q8CC88	Vwa8	von Willebrand factor A domain-containing protein 8	VWA8_MOUSE	-inf	4.54813e-06	1.9024e-05	2.17178e-05
Q99LC8	Eif2b1	Translation initiation factor eIF-2B subunit alpha	EI2BA_MOUSE	-inf	4.55618e-06	1.90437e-05	2.8095e-06
Q80ZX8	Spag1	Sperm-associated antigen 1	SPAG1_MOUSE	-inf	4.56811e-06	1.90796e-05	2.39103e-06
B1AS29	Grik3	Glutamate receptor ionotropic, kainate 3	GRIK3_MOUSE	-inf	4.5742e-06	1.9091e-05	2.73674e-06
O35681	Syt3	Synaptotagmin-3	SYT3_MOUSE	2.24168	4.57895e-06	1.90969e-05	0.000110831
A2RSQ0	Dennd5b	DENN domain-containing protein 5B	DEN5B_MOUSE	-inf	4.59201e-06	1.91373e-05	3.52034e-06
Q14B80	Kcnc2	Potassium voltage-gated channel subfamily C member 2	KCNC2_MOUSE	-inf	4.60085e-06	1.91601e-05	5.43555e-06
Q6PHQ8	Naa35	N-alpha-acetyltransferase 35, NatC auxiliary subunit	NAA35_MOUSE	-inf	4.60482e-06	1.91626e-05	6.57287e-06
Q99P72	Rtn4	Reticulon-4	RTN4_MOUSE	1.55194	4.62589e-06	1.92243e-05	0.000830184
Q9DD02	Hikeshi	Protein Hikeshi	HIKES_MOUSE	-inf	4.62876e-06	1.92243e-05	1.0572e-05
P60670	Nploc4	Nuclear protein localization protein 4 homolog	NPL4_MOUSE	-inf	4.62976e-06	1.92243e-05	1.49358e-05
Q8K2Y7	Mrpl47	39S ribosomal protein L47, mitochondrial	RM47_MOUSE	-inf	4.63699e-06	1.92403e-05	6.50678e-06
Q3TD49	Sppl2b	Signal peptide peptidase-like 2B	SPP2B_MOUSE	-inf	4.64629e-06	1.92564e-05	1.19614e-06
Q8C2E7	Washc5	WASH complex subunit 5	WASC5_MOUSE	-inf	4.64764e-06	1.92564e-05	1.77729e-05
Q6PCX7	Rgma	Repulsive guidance molecule A	RGMA_MOUSE	-inf	4.65457e-06	1.92711e-05	1.53244e-06
Q60857	Slc6a4	Sodium-dependent serotonin transporter	SC6A4_MOUSE	-inf	4.69017e-06	1.94035e-05	1.02456e-05
Q6RI63	Fam120b	Constitutive coactivator of peroxisome proliferator-activated receptor gamma	F120B_MOUSE	-inf	4.69336e-06	1.94035e-05	2.66616e-06
Q9Z0U1	Tjp2	Tight junction protein ZO-2	ZO2_MOUSE	-inf	4.70552e-06	1.94397e-05	1.64829e-05
O88736	Hsd17b7	3-keto-steroid reductase	DHB7_MOUSE	-inf	4.71614e-06	1.94695e-05	1.83766e-05
O08747	Unc5c	Netrin receptor UNC5C	UNC5C_MOUSE	-inf	4.72005e-06	1.94715e-05	2.80021e-06
Q8BNJ6	Neto2	Neuropilin and tolloid-like protein 2	NETO2_MOUSE	-inf	4.73178e-06	1.95058e-05	5.16427e-06
Q9Z2M7	Pmm2	Phosphomannomutase 2	PMM2_MOUSE	-inf	4.74365e-06	1.9519e-05	1.85513e-05
Q80YE4	Aatk	Serine/threonine-protein kinase LMTK1	LMTK1_MOUSE	3.38833	4.74458e-06	1.9519e-05	3.07472e-05
P32921	Wars	Tryptophan--tRNA ligase, cytoplasmic	SYWC_MOUSE	-inf	4.74528e-06	1.9519e-05	6.7383e-05
Q91YM4	Tbrg4	FAST kinase domain-containing protein 4	FAKD4_MOUSE	-inf	4.77441e-06	1.96247e-05	1.20421e-05
Q9JKX6	Nudt5	ADP-sugar pyrophosphatase	NUDT5_MOUSE	-inf	4.77924e-06	1.96304e-05	1.65327e-05
Q9QUR8	Sema7a	Semaphorin-7A	SEM7A_MOUSE	-inf	4.784e-06	1.96358e-05	1.26089e-05
P16390	Kcna3	Potassium voltage-gated channel subfamily A member 3	KCNA3_MOUSE	-inf	4.79637e-06	1.96724e-05	6.39143e-06
Q68ED2	Grm7	Metabotropic glutamate receptor 7	GRM7_MOUSE	-inf	4.79985e-06	1.96725e-05	1.58597e-05
Q61070	Ei24	Etoposide-induced protein 2.4	EI24_MOUSE	-inf	4.80848e-06	1.96937e-05	5.58467e-06
Q6NXM2	Rcbtb1	RCC1 and BTB domain-containing protein 1	RCBT1_MOUSE	-inf	4.82172e-06	1.97337e-05	1.78721e-06
B9EJA2	Cttnbp2	Cortactin-binding protein 2	CTTB2_MOUSE	-inf	4.83644e-06	1.97798e-05	5.1229e-05
Q99M28	Rnps1	RNA-binding protein with serine-rich domain 1	RNPS1_MOUSE	-inf	4.8409e-06	1.97838e-05	1.86007e-05
Q9WTN0	Ggps1	Geranylgeranyl pyrophosphate synthase	GGPPS_MOUSE	-inf	4.87962e-06	1.99191e-05	1.72484e-05
Q62178	Sema4a	Semaphorin-4A	SEM4A_MOUSE	-inf	4.88156e-06	1.99191e-05	1.00851e-05
Q6ZQB6	Ppip5k2	Inositol hexakisphosphate and diphosphoinositol-pentakisphosphate kinase 2	VIP2_MOUSE	-inf	4.8845e-06	1.99191e-05	3.3262e-06
Q5XJY5	Arcn1	Coatomer subunit delta	COPD_MOUSE	-inf	4.89652e-06	1.99522e-05	2.53847e-05
P50428	Arsa	Arylsulfatase A	ARSA_MOUSE	-inf	4.89963e-06	1.99522e-05	8.2821e-06
Q9CWU9	Nup37	Nucleoporin Nup37	NUP37_MOUSE	-inf	4.91833e-06	2.00141e-05	1.51175e-06
Q9EQG9	Cert	Ceramide transfer protein	CERT_MOUSE	-inf	4.92941e-06	2.00449e-05	3.39753e-06
Q8K2Q0	Commd9	COMM domain-containing protein 9	COMD9_MOUSE	-inf	4.94579e-06	2.00971e-05	1.01324e-05
P48320	Gad2	Glutamate decarboxylase 2	DCE2_MOUSE	-3.31979	4.95366e-06	2.01147e-05	0.000273009
P58389	Ptpa	Serine/threonine-protein phosphatase 2A activator	PTPA_MOUSE	-1.99976	4.96315e-06	2.01389e-05	0.000193606
Q8BNE1	Tcaf1	TRPM8 channel-associated factor 1	TCAF1_MOUSE	-inf	4.9722e-06	2.01613e-05	2.06628e-06
Q811J3	Ireb2	Iron-responsive element-binding protein 2	IREB2_MOUSE	-inf	4.99002e-06	2.02192e-05	3.07415e-06
Q0VGU4	Vgf	Neurosecretory protein VGF	VGF_MOUSE	-inf	4.99536e-06	2.02264e-05	0.00012403
P26450	Pik3r1	Phosphatidylinositol 3-kinase regulatory subunit alpha	P85A_MOUSE	-inf	5.04638e-06	2.04185e-05	5.23156e-06
Q9Z0Z4	Heph	Hephaestin	HEPH_MOUSE	-inf	5.05677e-06	2.0446e-05	1.37251e-06
Q64314	Cd34	Hematopoietic progenitor cell antigen CD34	CD34_MOUSE	-inf	5.06821e-06	2.04746e-05	9.44564e-06
Q62318	Trim28	Transcription intermediary factor 1-beta	TIF1B_MOUSE	-3.26952	5.07104e-06	2.04746e-05	6.31272e-05
O35668	Hap1	Huntingtin-associated protein 1	HAP1_MOUSE	-inf	5.09878e-06	2.05721e-05	2.50183e-05
Q3TAS6	Emc10	ER membrane protein complex subunit 10	EMC10_MOUSE	-inf	5.10784e-06	2.0594e-05	1.19407e-05
O35969	Gamt	Guanidinoacetate N-methyltransferase	GAMT_MOUSE	-inf	5.11381e-06	2.06035e-05	2.15764e-05
Q8K0S0	Phyhip	Phytanoyl-CoA hydroxylase-interacting protein	PHYIP_MOUSE	-2.66441	5.13419e-06	2.0671e-05	0.000299394
Q9D8B7	Jam3	Junctional adhesion molecule C	JAM3_MOUSE	-inf	5.16109e-06	2.07647e-05	5.6566e-05
Q91WA3	Hdac11	Histone deacetylase 11	HDA11_MOUSE	-inf	5.19772e-06	2.08973e-05	1.55308e-05
Q8BHI7	Elovl5	Elongation of very long chain fatty acids protein 5	ELOV5_MOUSE	-inf	5.20391e-06	2.09074e-05	6.3402e-06
Q8CHE4	Phlpp1	PH domain leucine-rich repeat-containing protein phosphatase 1	PHLP1_MOUSE	-inf	5.21686e-06	2.09214e-05	1.39295e-06
O70172	Pip4k2a	Phosphatidylinositol 5-phosphate 4-kinase type-2 alpha	PI42A_MOUSE	-inf	5.21805e-06	2.09214e-05	6.2503e-05
Q8R0J7	Vps37b	Vacuolar protein sorting-associated protein 37B	VP37B_MOUSE	-inf	5.22204e-06	2.09214e-05	5.52268e-06
Q8CH77	Nav1	Neuron navigator 1	NAV1_MOUSE	2.46941	5.22208e-06	2.09214e-05	2.09166e-05
Q922P8	Tmem132a	Transmembrane protein 132A	T132A_MOUSE	-inf	5.22652e-06	2.09244e-05	7.9996e-06
P15105	Glul	Glutamine synthetase	GLNA_MOUSE	-2.54698	5.29667e-06	2.11904e-05	0.0010638
Q8JZN5	Acad9	Complex I assembly factor ACAD9, mitochondrial	ACAD9_MOUSE	-inf	5.31169e-06	2.12356e-05	5.39788e-05
Q5PR69	Crad	Cancer-related regulator of actin dynamics	CRAD_MOUSE	-inf	5.31749e-06	2.12438e-05	3.60039e-06
Q8C170	Myo9a	Unconventional myosin-IXa	MYO9A_MOUSE	-inf	5.32706e-06	2.12629e-05	1.73441e-06
Q99LC3	Ndufa10	NADH dehydrogenase [ubiquinone] 1 alpha subcomplex subunit 10, mitochondrial	NDUAA_MOUSE	-3.38681	5.33222e-06	2.12629e-05	0.000282989
O88704	Hcn1	Potassium/sodium hyperpolarization-activated cyclic nucleotide-gated channel 1	HCN1_MOUSE	-inf	5.33344e-06	2.12629e-05	1.54971e-05
Q3UTJ2	Sorbs2	Sorbin and SH3 domain-containing protein 2	SRBS2_MOUSE	-inf	5.3418e-06	2.12706e-05	2.44841e-05
Q9D4F8	Tubgcp4	Gamma-tubulin complex component 4	GCP4_MOUSE	-inf	5.34286e-06	2.12706e-05	2.16916e-06
Q5XJY4	Parl	Presenilins-associated rhomboid-like protein, mitochondrial	PARL_MOUSE	-inf	5.35515e-06	2.13047e-05	6.02181e-06
Q6V4S5	Sdk2	Protein sidekick-2	SDK2_MOUSE	-inf	5.37523e-06	2.13696e-05	4.30198e-05
Q8BMF3	Me3	NADP-dependent malic enzyme, mitochondrial	MAON_MOUSE	-3.29496	5.41488e-06	2.15123e-05	0.000166006
Q8VE19	Mios	GATOR complex protein MIOS	MIO_MOUSE	-inf	5.43323e-06	2.1568e-05	5.01637e-06
Q91X52	Dcxr	L-xylulose reductase	DCXR_MOUSE	-inf	5.43873e-06	2.1568e-05	2.07233e-06
Q3TPE9	Ankmy2	Ankyrin repeat and MYND domain-containing protein 2	ANKY2_MOUSE	-inf	5.44027e-06	2.1568e-05	1.24264e-05
A2APY7	Ndufaf5	Arginine-hydroxylase NDUFAF5, mitochondrial	NDUF5_MOUSE	-inf	5.44688e-06	2.15723e-05	1.03334e-05
Q3U186	Rars2	Probable arginine--tRNA ligase, mitochondrial	SYRM_MOUSE	-inf	5.44893e-06	2.15723e-05	9.27613e-06
Q3UQ44	Iqgap2	Ras GTPase-activating-like protein IQGAP2	IQGA2_MOUSE	-inf	5.45865e-06	2.15958e-05	2.32233e-06
Q8K370	Acad10	Acyl-CoA dehydrogenase family member 10	ACD10_MOUSE	-inf	5.48991e-06	2.1703e-05	2.33284e-06
Q9EP72	Emc7	ER membrane protein complex subunit 7	EMC7_MOUSE	-inf	5.49336e-06	2.1703e-05	1.36131e-05
Q9R0P9	Uchl1	Ubiquitin carboxyl-terminal hydrolase isozyme L1	UCHL1_MOUSE	-1.9099	5.50544e-06	2.17356e-05	0.00257684
Q8VCX5	Micu1	Calcium uptake protein 1, mitochondrial	MICU1_MOUSE	-inf	5.51323e-06	2.17467e-05	2.88008e-05
Q8C7X2	Emc1	ER membrane protein complex subunit 1	EMC1_MOUSE	-2.25919	5.51905e-06	2.17467e-05	2.43129e-05
Q8BVG4	Dpp9	Dipeptidyl peptidase 9	DPP9_MOUSE	-inf	5.52387e-06	2.17467e-05	5.16782e-06
Q91YI1	Atg13	Autophagy-related protein 13	ATG13_MOUSE	-inf	5.52571e-06	2.17467e-05	5.06107e-06
Q8CA72	Gan	Gigaxonin	GAN_MOUSE	-inf	5.52734e-06	2.17467e-05	3.35796e-06
Q9JHW4	Eefsec	Selenocysteine-specific elongation factor	SELB_MOUSE	-inf	5.53272e-06	2.17529e-05	8.02476e-06
P27671	Rasgrf1	Ras-specific guanine nucleotide-releasing factor 1	RGRF1_MOUSE	-inf	5.53892e-06	2.17622e-05	1.14891e-05
Q8VE52	Ogfrl1	Opioid growth factor receptor-like protein 1	OGRL1_MOUSE	-inf	5.55071e-06	2.17852e-05	6.87877e-06
P28230	Gjb1	Gap junction beta-1 protein	CXB1_MOUSE	-inf	5.55243e-06	2.17852e-05	2.51444e-06
Q8K2D3	Edc3	Enhancer of mRNA-decapping protein 3	EDC3_MOUSE	-inf	5.56302e-06	2.18118e-05	5.86661e-06
Q61147	Cp	Ceruloplasmin	CERU_MOUSE	-inf	5.57047e-06	2.1826e-05	2.933e-06
Q5SUF2	Luc7l3	Luc7-like protein 3	LC7L3_MOUSE	-inf	5.57639e-06	2.18341e-05	5.34789e-06
Q9CZX9	Emc4	ER membrane protein complex subunit 4	EMC4_MOUSE	-inf	5.59287e-06	2.18734e-05	1.07058e-05
Q8BJF9	Chmp2b	Charged multivesicular body protein 2b	CHM2B_MOUSE	-inf	5.5941e-06	2.18734e-05	7.80366e-06
Q91W61	Fbxl15	F-box/LRR-repeat protein 15	FXL15_MOUSE	-inf	5.60043e-06	2.18832e-05	8.15082e-06
O70423	Aoc3	Membrane primary amine oxidase	AOC3_MOUSE	-inf	5.62723e-06	2.19728e-05	5.65267e-05
Q05D44	Eif5b	Eukaryotic translation initiation factor 5B	IF2P_MOUSE	-inf	5.64777e-06	2.20379e-05	7.2233e-06
Q8VEF1	Gramd1a	Protein Aster-A	ASTRA_MOUSE	-inf	5.68813e-06	2.217e-05	3.36311e-06
Q9DB34	Chmp2a	Charged multivesicular body protein 2a	CHM2A_MOUSE	-inf	5.68941e-06	2.217e-05	2.85278e-05
Q9WUP7	Uchl5	Ubiquitin carboxyl-terminal hydrolase isozyme L5	UCHL5_MOUSE	-inf	5.7199e-06	2.22736e-05	1.67059e-05
Q9CZ28	Snf8	Vacuolar-sorting protein SNF8	SNF8_MOUSE	-inf	5.72915e-06	2.22944e-05	7.22281e-06
Q99K23	Ufsp2	Ufm1-specific protease 2	UFSP2_MOUSE	-inf	5.76025e-06	2.23968e-05	6.26036e-06
P83093	Stim2	Stromal interaction molecule 2	STIM2_MOUSE	-inf	5.76334e-06	2.23968e-05	8.24462e-06
Q9DCJ9	Npl	N-acetylneuraminate lyase	NPL_MOUSE	-inf	5.77265e-06	2.24177e-05	1.20124e-05
Q8K3C3	Lzic	Protein LZIC	LZIC_MOUSE	-inf	5.80286e-06	2.24889e-05	1.07252e-05
Q99PI8	Rtn4r	Reticulon-4 receptor	RTN4R_MOUSE	-inf	5.80797e-06	2.24889e-05	7.15524e-06
Q91VI7	Rnh1	Ribonuclease inhibitor	RINI_MOUSE	1.52703	5.80826e-06	2.24889e-05	0.000206958
Q9WUM3	Coro1b	Coronin-1B	COR1B_MOUSE	-1.40589	5.81034e-06	2.24889e-05	0.000164804
Q80XU8	Lrfn4	Leucine-rich repeat and fibronectin type-III domain-containing protein 4	LRFN4_MOUSE	-inf	5.81071e-06	2.24889e-05	7.23347e-06
Q61771	Kif3b	Kinesin-like protein KIF3B	KIF3B_MOUSE	-inf	5.83321e-06	2.25569e-05	8.52893e-06
Q8CH09	Sugp2	SURP and G-patch domain-containing protein 2	SUGP2_MOUSE	-inf	5.8362e-06	2.25569e-05	7.14259e-06
P35486	Pdha1	Pyruvate dehydrogenase E1 component subunit alpha, somatic form, mitochondrial	ODPA_MOUSE	-2.42037	5.84186e-06	2.25634e-05	0.00114204
Q3U1V6	Uevld	Ubiquitin-conjugating enzyme E2 variant 3	UEVLD_MOUSE	-inf	5.85293e-06	2.25909e-05	4.28216e-06
Q8C0D5	Efl1	Elongation factor-like GTPase 1	EFL1_MOUSE	-inf	5.86663e-06	2.26284e-05	1.63147e-05
Q3U3Q1	Ulk3	Serine/threonine-protein kinase ULK3	ULK3_MOUSE	-inf	5.87786e-06	2.26564e-05	5.04146e-06
Q3UKJ7	Smu1	WD40 repeat-containing protein SMU1	SMU1_MOUSE	-inf	5.89343e-06	2.27011e-05	8.54125e-06
P62313	Lsm6	U6 snRNA-associated Sm-like protein LSm6	LSM6_MOUSE	-inf	5.89997e-06	2.27068e-05	2.47433e-05
P62257	Ube2h	Ubiquitin-conjugating enzyme E2 H	UBE2H_MOUSE	5.14932	5.90289e-06	2.27068e-05	0.000284222
Q8BTG3	Tcp11l1	T-complex protein 11-like protein 1	T11L1_MOUSE	2.48726	5.92188e-06	2.27645e-05	4.94623e-05
O55222	Ilk	Integrin-linked protein kinase	ILK_MOUSE	-inf	5.92761e-06	2.27711e-05	1.56257e-05
Q8K1J6	Trnt1	CCA tRNA nucleotidyltransferase 1, mitochondrial	TRNT1_MOUSE	-inf	5.94683e-06	2.28296e-05	2.0976e-05
Q8C854	Myef2	Myelin expression factor 2	MYEF2_MOUSE	-inf	5.95772e-06	2.2856e-05	7.31713e-05
P97492	Rgs14	Regulator of G-protein signaling 14	RGS14_MOUSE	-inf	5.96335e-06	2.28622e-05	1.32882e-05
P16092	Fgfr1;Fgfr2;Fgfr3;Fgfr4	Fibroblast growth factor receptor 1;Fibroblast growth factor receptor 2;Fibroblast growth factor receptor 3;Fibroblast growth factor receptor 4	FGFR1_MOUSE;FGFR2_MOUSE;FGFR3_MOUSE;FGFR4_MOUSE	-inf	5.98039e-06	2.29121e-05	4.37372e-06
Q62413	Epha6	Ephrin type-A receptor 6	EPHA6_MOUSE	-inf	6.01361e-06	2.30061e-05	3.78949e-06
Q9ES46	Parvb	Beta-parvin	PARVB_MOUSE	-inf	6.01698e-06	2.30061e-05	1.70006e-06
Q8K3A0	Hscb	Iron-sulfur cluster co-chaperone protein HscB	HSC20_MOUSE	-inf	6.0188e-06	2.30061e-05	7.39427e-06
Q8VCN9	Tbcc	Tubulin-specific chaperone C	TBCC_MOUSE	-inf	6.02109e-06	2.30061e-05	2.17146e-05
Q7TQI3	Otub1	Ubiquitin thioesterase OTUB1	OTUB1_MOUSE	1.63969	6.03818e-06	2.3056e-05	0.000761877
Q6PGH0	Ubtd2	Ubiquitin domain-containing protein 2	UBTD2_MOUSE	-inf	6.04993e-06	2.30854e-05	7.44351e-06
Q8BG02	Ppp2r2c	Serine/threonine-protein phosphatase 2A 55 kDa regulatory subunit B gamma isoform	2ABG_MOUSE	-inf	6.06074e-06	2.3104e-05	5.23653e-06
Q60972	Rbbp4	Histone-binding protein RBBP4	RBBP4_MOUSE	-inf	6.06294e-06	2.3104e-05	4.01572e-05
P63239	Pcsk1	Neuroendocrine convertase 1	NEC1_MOUSE	-inf	6.08995e-06	2.31794e-05	4.9601e-06
P50153	Gng4	Guanine nucleotide-binding protein G(I)/G(S)/G(O) subunit gamma-4	GBG4_MOUSE	-1.5595	6.09085e-06	2.31794e-05	0.000182253
Q07646	Mest	Mesoderm-specific transcript protein	MEST_MOUSE	-inf	6.10873e-06	2.32319e-05	4.2483e-06
Q922B1	Macrod1	ADP-ribose glycohydrolase MACROD1	MACD1_MOUSE	-inf	6.1164e-06	2.32456e-05	2.21637e-05
Q99LJ0	Cttnbp2nl	CTTNBP2 N-terminal-like protein	CT2NL_MOUSE	-inf	6.13251e-06	2.32913e-05	1.05428e-06
Q9JJ43	Rbfox1	RNA binding protein fox-1 homolog 1	RFOX1_MOUSE	-inf	6.16515e-06	2.33996e-05	1.29613e-05
Q8BHS6	Armcx3	Armadillo repeat-containing X-linked protein 3	ARMX3_MOUSE	-inf	6.19847e-06	2.34981e-05	8.00467e-06
Q91YE3	Egln1	Egl nine homolog 1	EGLN1_MOUSE	-inf	6.20111e-06	2.34981e-05	3.1914e-06
Q8BHD7	Ptbp3	Polypyrimidine tract-binding protein 3	PTBP3_MOUSE	-inf	6.20347e-06	2.34981e-05	6.76195e-06
P35293	Rab18	Ras-related protein Rab-18	RAB18_MOUSE	-2.00255	6.25327e-06	2.3671e-05	8.4374e-05
Q8R2Z5	Vwa1	von Willebrand factor A domain-containing protein 1	VWA1_MOUSE	-inf	6.28928e-06	2.37784e-05	4.78244e-06
Q8R1H0	Hopx	Homeodomain-only protein	HOP_MOUSE	-inf	6.28997e-06	2.37784e-05	2.69862e-06
Q76LS9	Mindy1	Ubiquitin carboxyl-terminal hydrolase MINDY-1	MINY1_MOUSE	-inf	6.31856e-06	2.38706e-05	1.18907e-05
E9PVA8	Gcn1	eIF-2-alpha kinase activator GCN1	GCN1_MOUSE	-inf	6.32576e-06	2.38743e-05	9.1989e-06
B2RR83	Ythdc2	3'-5' RNA helicase YTHDC2	YTDC2_MOUSE	-inf	6.32794e-06	2.38743e-05	2.7997e-06
P63280	Ube2i	SUMO-conjugating enzyme UBC9	UBC9_MOUSE	-inf	6.34029e-06	2.39051e-05	6.88661e-05
Q4FK66	Prpf38a	Pre-mRNA-splicing factor 38A	PR38A_MOUSE	-inf	6.35011e-06	2.39132e-05	6.69928e-06
Q8BVY0	Rsl1d1	Ribosomal L1 domain-containing protein 1	RL1D1_MOUSE	-inf	6.35084e-06	2.39132e-05	4.41397e-06
P97819	Pla2g6	85/88 kDa calcium-independent phospholipase A2	PLPL9_MOUSE	-inf	6.36333e-06	2.39445e-05	1.72026e-06
Q80WC7	Agfg2	Arf-GAP domain and FG repeat-containing protein 2	AGFG2_MOUSE	1.93561	6.37616e-06	2.39769e-05	9.29722e-05
Q9D7H3	RtcA	RNA 3'-terminal phosphate cyclase	RTCA_MOUSE	-inf	6.38519e-06	2.39826e-05	3.10448e-05
Q8R1X6	Spart	Spartin	SPART_MOUSE	2.13796	6.38609e-06	2.39826e-05	5.50393e-05
Q9CQF4	Mtres1	Mitochondrial transcription rescue factor 1	MRES1_MOUSE	-inf	6.41898e-06	2.40816e-05	1.46943e-05
Q3UV70	Pdp1	[Pyruvate dehydrogenase [acetyl-transferring]]-phosphatase 1, mitochondrial	PDP1_MOUSE	-inf	6.42456e-06	2.40816e-05	2.84961e-05
P58044	Idi1	Isopentenyl-diphosphate Delta-isomerase 1	IDI1_MOUSE	-inf	6.42578e-06	2.40816e-05	2.64952e-05
Q8VD75	Hip1	Huntingtin-interacting protein 1	HIP1_MOUSE	-inf	6.42937e-06	2.40816e-05	9.09857e-06
Q9JK42	Pdk2	[Pyruvate dehydrogenase (acetyl-transferring)] kinase isozyme 2, mitochondrial	PDK2_MOUSE	-inf	6.46082e-06	2.41835e-05	4.56391e-05
O35127	Grcc10	Protein C10	C10_MOUSE	-1.47884	6.46518e-06	2.41839e-05	3.68783e-05
Q8R554	Otud7a	OTU domain-containing protein 7A	OTU7A_MOUSE	-inf	6.48477e-06	2.42413e-05	9.25275e-06
Q8K2C6	Sirt5	NAD-dependent protein deacylase sirtuin-5, mitochondrial	SIR5_MOUSE	-inf	6.49014e-06	2.42433e-05	2.67456e-05
Q9R1Q8	Tagln3	Transgelin-3	TAGL3_MOUSE	3.20466	6.49382e-06	2.42433e-05	0.0043862
E9PZ19	Igsf9b	Protein turtle homolog B	TUTLB_MOUSE	-inf	6.49869e-06	2.42456e-05	7.73611e-06
Q9D853	Eef1akmt2	EEF1A lysine methyltransferase 2	EFMT2_MOUSE	-inf	6.54603e-06	2.44062e-05	2.87853e-06
Q920R0	Als2	Alsin	ALS2_MOUSE	-inf	6.58638e-06	2.45018e-05	3.62862e-06
Q6PAM1	Txlna	Alpha-taxilin	TXLNA_MOUSE	-inf	6.59124e-06	2.45018e-05	4.28078e-05
Q64444	Ca4	Carbonic anhydrase 4	CAH4_MOUSE	-inf	6.59164e-06	2.45018e-05	1.09879e-05
Q9D0F3	Lman1	Protein ERGIC-53	LMAN1_MOUSE	-inf	6.59525e-06	2.45018e-05	7.75152e-06
Q9CZX7	Pip4p2	Type 2 phosphatidylinositol 4,5-bisphosphate 4-phosphatase	PP4P2_MOUSE	-inf	6.59704e-06	2.45018e-05	8.71006e-06
Q8BTY1	Kyat1	Kynurenine--oxoglutarate transaminase 1	KAT1_MOUSE	-inf	6.59747e-06	2.45018e-05	7.46633e-06
Q9D404	Oxsm	3-oxoacyl-[acyl-carrier-protein] synthase, mitochondrial	OXSM_MOUSE	-inf	6.60574e-06	2.45165e-05	1.23483e-05
Q9CPR1	Rwdd4	RWD domain-containing protein 4	RWDD4_MOUSE	-inf	6.63484e-06	2.46085e-05	4.82976e-06
Q91WG5	Prkag2	5'-AMP-activated protein kinase subunit gamma-2	AAKG2_MOUSE	-inf	6.64129e-06	2.46164e-05	8.07772e-06
Q5HZI2	C2cd4cC2CD4 family	C2 calcium-dependent domain-containing protein 4C	C2C4C_MOUSE	-inf	6.65358e-06	2.46459e-05	2.03846e-05
Q923S9	Rab30	Ras-related protein Rab-30	RAB30_MOUSE	-inf	6.67211e-06	2.46985e-05	1.17192e-05
Q8BG18	Necab1	N-terminal EF-hand calcium-binding protein 1	NECA1_MOUSE	-inf	6.68262e-06	2.47113e-05	3.14684e-05
Q8BT60	Cpne3	Copine-3	CPNE3_MOUSE	4.04557	6.68425e-06	2.47113e-05	0.000236241
Q8BNN1	Spata2l	Spermatogenesis-associated protein 2-like protein	SPA2L_MOUSE	-inf	6.68908e-06	2.47132e-05	5.68957e-05
Q9EQN3	Tsc22d4	TSC22 domain family protein 4	T22D4_MOUSE	-inf	6.70828e-06	2.4768e-05	2.31775e-05
Q9WTX6	Cul1	Cullin homolog 1,Cullin-1	CUL1_MOUSE	-inf	6.72707e-06	2.48213e-05	2.28266e-05
Q9Z2X1	Hnrnpf	Heterogeneous nuclear ribonucleoprotein F	HNRPF_MOUSE	-inf	6.78163e-06	2.5003e-05	2.21459e-05
Q9QZE7	Tsnax	Translin-associated protein X	TSNAX_MOUSE	-inf	6.78681e-06	2.5003e-05	9.31408e-06
P60824	Cirbp	Cold-inducible RNA-binding protein	CIRBP_MOUSE	-inf	6.78947e-06	2.5003e-05	4.18022e-05
P18608	Hmgn1	Non-histone chromosomal protein HMG-14	HMGN1_MOUSE	-inf	6.80554e-06	2.50276e-05	4.51268e-06
Q8K0D0	Cdk17	Cyclin-dependent kinase 17	CDK17_MOUSE	-inf	6.80601e-06	2.50276e-05	9.1828e-06
Q80WT5	Aftph	Aftiphilin	AFTIN_MOUSE	2.60327	6.80933e-06	2.50276e-05	4.10128e-05
Q66GT5	Ptpmt1	Phosphatidylglycerophosphatase and protein-tyrosine phosphatase 1	PTPM1_MOUSE	-inf	6.81477e-06	2.50314e-05	1.13608e-05
A2APV2	Fmnl2	Formin-like protein 2	FMNL2_MOUSE	-inf	6.83479e-06	2.50888e-05	1.3139e-05
P35546	Ret	Proto-oncogene tyrosine-protein kinase receptor Ret	RET_MOUSE	5.68863	6.84474e-06	2.50983e-05	0.000240677
Q8CHS8	Vps37a	Vacuolar protein sorting-associated protein 37A	VP37A_MOUSE	2.15557	6.8462e-06	2.50983e-05	2.50146e-05
P29391	Ftl1	Ferritin light chain 1	FRIL1_MOUSE	-inf	6.86873e-06	2.51647e-05	6.74348e-05
Q9EPC1	Parva	Alpha-parvin	PARVA_MOUSE	-inf	6.89084e-06	2.52116e-05	5.83659e-06
Q9QUG9	Rasgrp2	RAS guanyl-releasing protein 2	GRP2_MOUSE	-inf	6.89566e-06	2.52116e-05	7.57458e-05
Q9R062	Gyg1	Glycogenin-1	GLYG_MOUSE	1.86321	6.89826e-06	2.52116e-05	8.9567e-05
Q9Z2L6	Minpp1	Multiple inositol polyphosphate phosphatase 1	MINP1_MOUSE	-inf	6.89929e-06	2.52116e-05	3.30932e-06
Q5XG69	Fam169a	Soluble lamin-associated protein of 75 kDa	F169A_MOUSE	-inf	6.90675e-06	2.52116e-05	1.66797e-05
Q80VQ0	Aldh3b1	Aldehyde dehydrogenase family 3 member B1	AL3B1_MOUSE	-inf	6.90809e-06	2.52116e-05	1.96444e-05
Q05512	Mark2	Serine/threonine-protein kinase MARK2	MARK2_MOUSE	-2.07026	6.92192e-06	2.5246e-05	3.60793e-05
Q91V57	Chn1	N-chimaerin	CHIN_MOUSE	-inf	6.93075e-06	2.52538e-05	8.37867e-06
Q91YI0	Asl	Argininosuccinate lyase	ARLY_MOUSE	-inf	6.93735e-06	2.52538e-05	1.65217e-05
P51655	Gpc4	Glypican-4	GPC4_MOUSE	-inf	6.93737e-06	2.52538e-05	8.75529e-06
Q7TNS7	Asic4	Acid-sensing ion channel 4	ASIC4_MOUSE	-inf	6.95758e-06	2.53112e-05	2.80942e-06
Q8K0V2	Dcun1d3	DCN1-like protein 3	DCNL3_MOUSE	-inf	6.97634e-06	2.53633e-05	4.63695e-06
Q91X58	Zfand2b	AN1-type zinc finger protein 2B	ZFN2B_MOUSE	-inf	6.98126e-06	2.53649e-05	8.19881e-06
Q9D855	Uqcrb	Cytochrome b-c1 complex subunit 7	QCR7_MOUSE	-4.68434	6.99101e-06	2.53842e-05	0.000506223
Q9EPB4	Pycard	Apoptosis-associated speck-like protein containing a CARD	ASC_MOUSE	-inf	7.03862e-06	2.55408e-05	3.55459e-06
Q505B7	Zbtb8os	Protein archease	ARCH_MOUSE	3.0242	7.09573e-06	2.5724e-05	4.17365e-05
Q8R3N6	Thoc1	THO complex subunit 1	THOC1_MOUSE	-inf	7.09957e-06	2.5724e-05	1.16673e-06
Q9D8X1	Cutc	Copper homeostasis protein cutC homolog	CUTC_MOUSE	-inf	7.10265e-06	2.5724e-05	9.76406e-06
Q9D1N9	Mrpl21	39S ribosomal protein L21, mitochondrial	RM21_MOUSE	-inf	7.11181e-06	2.57408e-05	6.98717e-06
Q6PEV3	Wipf2	WAS/WASL-interacting protein family member 2	WIPF2_MOUSE	3.0018	7.17165e-06	2.59409e-05	0.000201066
P31230	Aimp1	Aminoacyl tRNA synthase complex-interacting multifunctional protein 1	AIMP1_MOUSE	-inf	7.1903e-06	2.59919e-05	3.27926e-05
Q9R118	Htra1	Serine protease HTRA1	HTRA1_MOUSE	-inf	7.20251e-06	2.60195e-05	8.11066e-06
Q9D020	Nt5c3a	Cytosolic 5'-nucleotidase 3A	5NT3A_MOUSE	-inf	7.21434e-06	2.60201e-05	9.25767e-06
P63089	Ptn	Pleiotrophin	PTN_MOUSE	-inf	7.2161e-06	2.60201e-05	2.51212e-05
P58242	Smpdl3b	Acid sphingomyelinase-like phosphodiesterase 3b	ASM3B_MOUSE	-inf	7.2164e-06	2.60201e-05	1.72365e-05
Q80YA7	Dpp8	Dipeptidyl peptidase 8	DPP8_MOUSE	-inf	7.22165e-06	2.60226e-05	7.04215e-06
Q5IRJ6	Slc30a9	Zinc transporter 9	ZNT9_MOUSE	-inf	7.24449e-06	2.60884e-05	2.62676e-05
B1AZA5	Tmem245	Transmembrane protein 245	TM245_MOUSE	-inf	7.30683e-06	2.62963e-05	2.99704e-06
Q8QZY9	Sf3b4	Splicing factor 3B subunit 4	SF3B4_MOUSE	-inf	7.31657e-06	2.63147e-05	5.36335e-06
Q924T7	Rnf31	E3 ubiquitin-protein ligase RNF31	RNF31_MOUSE	-inf	7.32567e-06	2.63188e-05	3.72045e-06
O88569	Hnrnpa2b1	Heterogeneous nuclear ribonucleoproteins A2/B1	ROA2_MOUSE	-4.85945	7.32695e-06	2.63188e-05	0.000487775
Q6PGL7	Washc2	WASH complex subunit 2	WASC2_MOUSE	-inf	7.38124e-06	2.64971e-05	6.84166e-06
P52795	Efnb1	Ephrin-B1	EFNB1_MOUSE	-inf	7.41107e-06	2.65869e-05	3.88727e-06
P56942	Pmch	Pro-MCH	MCH_MOUSE	-inf	7.41559e-06	2.65869e-05	9.57073e-06
Q80TT2	Baiap3	BAI1-associated protein 3	BAIP3_MOUSE	-inf	7.44568e-06	2.66701e-05	9.90866e-06
Q99LB6	Mat2b	Methionine adenosyltransferase 2 subunit beta	MAT2B_MOUSE	-inf	7.44816e-06	2.66701e-05	5.91139e-05
Q9QX60	Dguok	Deoxyguanosine kinase, mitochondrial	DGUOK_MOUSE	-inf	7.45285e-06	2.66702e-05	9.85951e-06
P60229	Eif3e;EIF3E	Eukaryotic translation initiation factor 3 subunit E	EIF3E_MOUSE;EIF3E_HUMAN	-1.40826	7.4627e-06	2.66887e-05	4.20277e-05
P63024	Vamp3	Vesicle-associated membrane protein 3	VAMP3_MOUSE	-inf	7.47569e-06	2.67183e-05	9.73419e-06
Q4ACU6	Shank3	SH3 and multiple ankyrin repeat domains protein 3	SHAN3_MOUSE	-3.95513	7.48588e-06	2.6738e-05	0.000143844
Q99MN1	Kars1	Lysine--tRNA ligase	SYK_MOUSE	-inf	7.49823e-06	2.67653e-05	4.41244e-05
Q8C4B4	Unc119b	Protein unc-119 homolog B	U119B_MOUSE	-inf	7.5098e-06	2.67898e-05	2.42239e-06
Q6PDG8	Mon1a	Vacuolar fusion protein MON1 homolog A	MON1A_MOUSE	-inf	7.51998e-06	2.67989e-05	1.34088e-06
O55003	Bnip3	BCL2/adenovirus E1B 19 kDa protein-interacting protein 3	BNIP3_MOUSE	-inf	7.52177e-06	2.67989e-05	1.39514e-05
O70566	Diaph2	Protein diaphanous homolog 2	DIAP2_MOUSE	-inf	7.53935e-06	2.68448e-05	3.2671e-05
Q3U5F4	Yrdc	YrdC domain-containing protein, mitochondrial	YRDC_MOUSE	-inf	7.5793e-06	2.69585e-05	5.43172e-06
P84084	Arf5	ADP-ribosylation factor 5	ARF5_MOUSE	2.98694	7.58458e-06	2.69585e-05	0.00092873
O08915	Aip	AH receptor-interacting protein	AIP_MOUSE	-inf	7.58548e-06	2.69585e-05	2.86608e-05
Q9Z1Q5	Clic1	Chloride intracellular channel protein 1	CLIC1_MOUSE	-inf	7.60726e-06	2.7019e-05	1.10899e-05
Q3UMB9	Washc4	WASH complex subunit 4	WASC4_MOUSE	-inf	7.63128e-06	2.7074e-05	4.13707e-06
Q5SW19	Cluh	Clustered mitochondria protein homolog	CLU_MOUSE	-inf	7.63224e-06	2.7074e-05	9.79429e-06
Q8K1A6	Cc2d1a	Coiled-coil and C2 domain-containing protein 1A	C2D1A_MOUSE	-inf	7.64791e-06	2.71127e-05	1.05759e-05
O70572	Smpd2	Sphingomyelin phosphodiesterase 2	NSMA_MOUSE	-inf	7.68907e-06	2.72291e-05	3.35579e-06
Q9CW79	Golga1	Golgin subfamily A member 1	GOGA1_MOUSE	-inf	7.69232e-06	2.72291e-05	2.25467e-06
Q5SUE8	Ankrd40	Ankyrin repeat domain-containing protein 40	ANR40_MOUSE	-inf	7.69507e-06	2.72291e-05	1.61538e-06
Q6PB90	Pcdhb14	Protocadherin beta-14	PCDBE_MOUSE	-inf	7.70101e-06	2.72332e-05	4.88668e-06
Q9JJL8	Sars2	Serine--tRNA ligase, mitochondrial	SYSM_MOUSE	-inf	7.72594e-06	2.7297e-05	6.65765e-06
O88487	Dync1i2	Cytoplasmic dynein 1 intermediate chain 2	DC1I2_MOUSE	-2.60657	7.72863e-06	2.7297e-05	8.44291e-05
Q09LZ8	Agbl4	Cytosolic carboxypeptidase 6	CBPC6_MOUSE	-inf	7.75219e-06	2.73557e-05	4.37035e-06
Q8VDQ1	Ptgr2	Prostaglandin reductase 2	PTGR2_MOUSE	1.44395	7.75781e-06	2.73557e-05	0.000101986
Q9QWR8	Naga	Alpha-N-acetylgalactosaminidase	NAGAB_MOUSE	-inf	7.75967e-06	2.73557e-05	1.05581e-05
Q8K341	Atat1	Alpha-tubulin N-acetyltransferase 1	ATAT_MOUSE	2.36663	7.76557e-06	2.73596e-05	6.94527e-05
Q3TZM9	Alg11	GDP-Man:Man(3)GlcNAc(2)-PP-Dol alpha-1,2-mannosyltransferase	ALG11_MOUSE	-inf	7.77277e-06	2.7368e-05	2.73569e-06
Q68FF0	Kiaa1841	Uncharacterized protein KIAA1841	K1841_MOUSE	-inf	7.77817e-06	2.73701e-05	1.83099e-06
Q8K4R4	Pitpnc1	Cytoplasmic phosphatidylinositol transfer protein 1	PITC1_MOUSE	-inf	7.78907e-06	2.73915e-05	3.37977e-05
Q8BTE0	Sdhaf4	Succinate dehydrogenase assembly factor 4, mitochondrial	SDHF4_MOUSE	-inf	7.81437e-06	2.74636e-05	7.67903e-06
P35550	Fbl	rRNA 2'-O-methyltransferase fibrillarin	FBRL_MOUSE	-inf	7.82275e-06	2.74761e-05	1.07248e-05
Q1HFZ0	Nsun2	RNA cytosine C(5)-methyltransferase NSUN2	NSUN2_MOUSE	-inf	7.8302e-06	2.74853e-05	3.75926e-06
Q8R191	Syngr3	Synaptogyrin-3	SNG3_MOUSE	3.62081	7.8425e-06	2.75115e-05	0.00824112
Q8VEL9	Rem2	GTP-binding protein REM 2	REM2_MOUSE	-inf	7.87816e-06	2.76196e-05	3.93587e-05
Q69ZK0	Prex1	Phosphatidylinositol 3,4,5-trisphosphate-dependent Rac exchanger 1 protein	PREX1_MOUSE	-inf	7.88826e-06	2.7638e-05	5.31739e-06
Q9WUB0	Rbck1	RanBP-type and C3HC4-type zinc finger-containing protein 1	HOIL1_MOUSE	-inf	7.92678e-06	2.775e-05	7.20325e-06
Q9QUJ7	Acsl4	Long-chain-fatty-acid--CoA ligase 4	ACSL4_MOUSE	-inf	7.931e-06	2.775e-05	4.47255e-06
Q69ZP3	Pnkd	Probable hydrolase PNKD	PNKD_MOUSE	-inf	7.9471e-06	2.775e-05	1.90304e-05
Q8BLY2	Tarsl2	Threonine--tRNA ligase 2, cytoplasmic	SYTC2_MOUSE	-inf	7.94754e-06	2.775e-05	2.06037e-05
Q920P3	Brinp1	BMP/retinoic acid-inducible neural-specific protein 1	BRNP1_MOUSE	-inf	7.9493e-06	2.775e-05	1.34474e-05
Q0KL01	Ubxn2b	UBX domain-containing protein 2B	UBX2B_MOUSE	-inf	7.94944e-06	2.775e-05	1.07683e-05
Q99LS3	Psph	Phosphoserine phosphatase	SERB_MOUSE	-inf	7.96129e-06	2.7764e-05	2.74688e-05
Q9CQE7	Ergic3	Endoplasmic reticulum-Golgi intermediate compartment protein 3	ERGI3_MOUSE	-inf	7.96322e-06	2.7764e-05	4.71655e-06
Q99LB7	Sardh	Sarcosine dehydrogenase, mitochondrial	SARDH_MOUSE	-inf	7.97287e-06	2.77778e-05	4.70269e-06
B2RUR8	Otud7b	OTU domain-containing protein 7B	OTU7B_MOUSE	-inf	7.97691e-06	2.77778e-05	2.93376e-06
O35304	Slc18a3	Vesicular acetylcholine transporter	VACHT_MOUSE	-inf	8.02117e-06	2.79149e-05	8.88545e-06
Q61704	Itih3	Inter-alpha-trypsin inhibitor heavy chain H3	ITIH3_MOUSE	-inf	8.0309e-06	2.79316e-05	6.11191e-06
Q9CQT1	Mri1	Methylthioribose-1-phosphate isomerase	MTNA_MOUSE	-inf	8.04497e-06	2.79322e-05	1.10901e-05
O88792	F11r	Junctional adhesion molecule A	JAM1_MOUSE	-inf	8.05636e-06	2.79322e-05	2.38731e-06
Q80WJ7	Mtdh	Protein LYRIC	LYRIC_MOUSE	-2.69084	8.05872e-06	2.79322e-05	5.38632e-05
Q6PH08	Erc2	ERC protein 2	ERC2_MOUSE	2.92258	8.05901e-06	2.79322e-05	0.000548463
Q8BIV3	Ranbp6	Ran-binding protein 6	RNBP6_MOUSE	-inf	8.05935e-06	2.79322e-05	6.26353e-06
P70697	Urod	Uroporphyrinogen decarboxylase	DCUP_MOUSE	-inf	8.06048e-06	2.79322e-05	1.92847e-05
P60202	Plp1;PLP1,PLP1	Myelin proteolipid protein;Myelin proteolipid protein,Patatin-like protein 1	MYPR_MOUSE;MYPR_HUMAN,PLP1_ARATH	-inf	8.0873e-06	2.79942e-05	0.00716908
Q9CXU9	Eif1b	Eukaryotic translation initiation factor 1b	EIF1B_MOUSE	-inf	8.08819e-06	2.79942e-05	3.81969e-05
P59016	Vps33b	Vacuolar protein sorting-associated protein 33B	VP33B_MOUSE	-inf	8.10446e-06	2.80335e-05	1.82939e-05
Q8C0J2	Atg16l1	Autophagy-related protein 16-1	A16L1_MOUSE	-inf	8.12267e-06	2.80525e-05	2.98497e-06
Q3TDD9	Ppp1r21	Protein phosphatase 1 regulatory subunit 21	PPR21_MOUSE	-inf	8.13488e-06	2.80525e-05	1.62667e-05
Q921M4	Golga2	Golgin subfamily A member 2	GOGA2_MOUSE	-inf	8.13554e-06	2.80525e-05	4.17641e-06
Q60847	Col12a1	Collagen alpha-1(XII) chain	COCA1_MOUSE	-inf	8.13707e-06	2.80525e-05	1.92936e-06
Q9CQU3	Rer1	Protein RER1	RER1_MOUSE	-inf	8.13748e-06	2.80525e-05	7.7937e-06
P61222	Abce1	ATP-binding cassette sub-family E member 1	ABCE1_MOUSE	-inf	8.14415e-06	2.80525e-05	1.9969e-05
O88796	Rpp30	Ribonuclease P protein subunit p30	RPP30_MOUSE	-inf	8.14442e-06	2.80525e-05	2.12769e-06
E9Q4S1	Pde8b	High affinity cAMP-specific and IBMX-insensitive 3',5'-cyclic phosphodiesterase 8B	PDE8B_MOUSE	-inf	8.1504e-06	2.80561e-05	7.97233e-06
O88602	Cacng2	Voltage-dependent calcium channel gamma-2 subunit	CCG2_MOUSE	-inf	8.17545e-06	2.81111e-05	1.6843e-05
Q61543	Glg1	Golgi apparatus protein 1	GSLG1_MOUSE	-inf	8.17626e-06	2.81111e-05	1.84464e-05
Q8CG72	Adprhl2	ADP-ribose glycohydrolase ARH3	ARHL2_MOUSE	-inf	8.18138e-06	2.81118e-05	2.48613e-05
Q9CZJ0	Mpped2	Metallophosphoesterase MPPED2	MPPD2_MOUSE	-inf	8.19675e-06	2.81476e-05	5.76297e-06
Q8VCL2	Sco2	Protein SCO2 homolog, mitochondrial	SCO2_MOUSE	-inf	8.20346e-06	2.8152e-05	3.9673e-06
Q3UEB3	Puf60	Poly(U)-binding-splicing factor PUF60	PUF60_MOUSE	-inf	8.20792e-06	2.8152e-05	3.10463e-05
Q91YN5	Uap1	UDP-N-acetylhexosamine pyrophosphorylase	UAP1_MOUSE	-inf	8.2272e-06	2.82012e-05	5.07711e-06
P02089	Hbb-b2	Hemoglobin subunit beta-2	HBB2_MOUSE	-inf	8.28114e-06	2.8369e-05	0.0010728
Q80TI0	Gramd1b	Protein Aster-B	ASTRB_MOUSE	-inf	8.28962e-06	2.8381e-05	5.81697e-06
Q8C015	Pak5	Serine/threonine-protein kinase PAK 5	PAK5_MOUSE	-inf	8.31392e-06	2.84317e-05	4.30286e-06
Q923X4	Glrx2	Glutaredoxin-2, mitochondrial	GLRX2_MOUSE	-inf	8.31442e-06	2.84317e-05	4.68195e-06
Q924S7	Spred2	Sprouty-related, EVH1 domain-containing protein 2	SPRE2_MOUSE	-inf	8.32033e-06	2.84348e-05	2.11554e-06
Q9WTR6	Slc7a11	Cystine/glutamate transporter	XCT_MOUSE	-inf	8.3421e-06	2.84922e-05	7.18965e-06
Q99P88	Nup155	Nuclear pore complex protein Nup155	NU155_MOUSE	-inf	8.3853e-06	2.86225e-05	5.11462e-06
O70194	Eif3d	Eukaryotic translation initiation factor 3 subunit D	EIF3D_MOUSE	-inf	8.4171e-06	2.86875e-05	2.30886e-05
Q6VNS1	Ntrk3	NT-3 growth factor receptor	NTRK3_MOUSE	-inf	8.41845e-06	2.86875e-05	1.62888e-05
Q9JM63	Kcnj10	ATP-sensitive inward rectifier potassium channel 10	KCJ10_MOUSE	-inf	8.42096e-06	2.86875e-05	3.582e-05
Q8BHG1	Nrdc	Nardilysin	NRDC_MOUSE	-inf	8.42448e-06	2.86875e-05	1.19344e-05
Q921H9	Coa7	Cytochrome c oxidase assembly factor 7	COA7_MOUSE	-inf	8.43154e-06	2.86944e-05	2.35355e-05
Q8CCJ3	Ufl1	E3 UFM1-protein ligase 1	UFL1_MOUSE	-inf	8.445e-06	2.87231e-05	5.02733e-06
P54818	Galc	Galactocerebrosidase	GALC_MOUSE	-inf	8.47266e-06	2.87986e-05	3.0592e-06
Q3TH73	Ttyh2	Protein tweety homolog 2	TTYH2_MOUSE	-inf	8.47731e-06	2.87986e-05	7.0978e-06
Q7TSK2	Sez6	Seizure protein 6	SEZ6_MOUSE	-inf	8.48383e-06	2.88036e-05	7.66036e-06
Q8R0Y6	Aldh1l1	Cytosolic 10-formyltetrahydrofolate dehydrogenase	AL1L1_MOUSE	-inf	8.49246e-06	2.88157e-05	6.82143e-05
D3YV10	Ccdc13	Coiled-coil domain-containing protein 13	CCD13_MOUSE	-inf	8.50938e-06	2.88328e-05	2.21756e-05
D3Z7H4	Gsg1l	Germ cell-specific gene 1-like protein	GSG1L_MOUSE	-inf	8.51362e-06	2.88328e-05	8.20769e-06
Q9CWU6	Uqcc1	Ubiquinol-cytochrome-c reductase complex assembly factor 1	UQCC1_MOUSE	-inf	8.51866e-06	2.88328e-05	1.37349e-05
O35143	ATP5IF1	ATPase inhibitor, mitochondrial	ATIF1_MOUSE	-6.06292	8.52021e-06	2.88328e-05	0.000832556
Q8K1Z0	Coq9	Ubiquinone biosynthesis protein COQ9, mitochondrial	COQ9_MOUSE	-inf	8.52282e-06	2.88328e-05	4.52846e-05
P70362	Ufd1	Ubiquitin recognition factor in ER-associated degradation protein 1	UFD1_MOUSE	-inf	8.56853e-06	2.89703e-05	1.82578e-05
Q7TN29	Smap2	Stromal membrane-associated protein 2	SMAP2_MOUSE	2.19711	8.6024e-06	2.90675e-05	0.000327659
Q9DCT1	Akr1e2	1,5-anhydro-D-fructose reductase	AKCL2_MOUSE	-inf	8.6179e-06	2.91026e-05	1.50095e-05
Q3TLS3	Gdpgp1	GDP-D-glucose phosphorylase 1	GDPP1_MOUSE	-inf	8.63742e-06	2.91513e-05	9.56929e-06
Q8R2U0	Seh1l	Nucleoporin SEH1	SEH1_MOUSE	-inf	8.69249e-06	2.93198e-05	4.85342e-06
Q8K3F6	Kcnq3	Potassium voltage-gated channel subfamily KQT member 3	KCNQ3_MOUSE	-inf	8.72884e-06	2.9425e-05	3.39947e-06
Q99LX0	Park7	Protein/nucleic acid deglycase DJ-1	PARK7_MOUSE	-1.26426	8.7426e-06	2.94507e-05	0.000573506
P62080	Tspan5	Tetraspanin-5	TSN5_MOUSE	-inf	8.7468e-06	2.94507e-05	9.63565e-06
Q9D8E6	Rpl4	60S ribosomal protein L4	RL4_MOUSE	1.11663	8.76734e-06	2.95024e-05	0.000384484
Q3UFF7	Lyplal1	Lysophospholipase-like protein 1	LYPL1_MOUSE	-inf	8.79873e-06	2.95905e-05	7.95699e-06
Q9QZB0	Rgs17	Regulator of G-protein signaling 17	RGS17_MOUSE	-inf	8.81809e-06	2.96231e-05	2.68116e-05
Q9Z172	Sumo3	Small ubiquitin-related modifier 3	SUMO3_MOUSE	-inf	8.81882e-06	2.96231e-05	0.000124027
Q32NY4	Cnnm3	Metal transporter CNNM3	CNNM3_MOUSE	-inf	8.82557e-06	2.96283e-05	4.12744e-06
P70444	Bid	BH3-interacting domain death agonist	BID_MOUSE	-inf	8.83465e-06	2.96414e-05	3.46114e-06
Q9DCJ5	Ndufa8	NADH dehydrogenase [ubiquinone] 1 alpha subcomplex subunit 8	NDUA8_MOUSE	-3.53091	8.86076e-06	2.97115e-05	0.000218069
Q8R180	Ero1a	ERO1-like protein alpha	ERO1A_MOUSE	-inf	8.8671e-06	2.97152e-05	1.13201e-05
Q64008	Rab34	Ras-related protein Rab-34	RAB34_MOUSE	-inf	8.8908e-06	2.97771e-05	1.9228e-06
Q69ZX8	Ablim3	Actin-binding LIM protein 3	ABLM3_MOUSE	3.47432	8.93485e-06	2.99071e-05	3.85662e-05
Q8VCM8	Ncln	Nicalin	NCLN_MOUSE	-inf	8.94516e-06	2.9924e-05	1.88819e-05
Q8K0D7	Wrb	Tail-anchored protein insertion receptor WRB	WRB_MOUSE	-inf	8.96061e-06	2.99581e-05	7.45507e-06
Q62093	Srsf2	Serine/arginine-rich splicing factor 2	SRSF2_MOUSE	-4.66718	9.00289e-06	3.00818e-05	0.000143218
Q8CBY8	Dctn4	Dynactin subunit 4	DCTN4_MOUSE	1.84059	9.01777e-06	3.01138e-05	0.000155781
P63248	Pkia	cAMP-dependent protein kinase inhibitor alpha	IPKA_MOUSE	-inf	9.03919e-06	3.01677e-05	2.45867e-05
P35276	Rab3d	Ras-related protein Rab-3D	RAB3D_MOUSE	1.69305	9.0508e-06	3.01888e-05	0.00161773
Q8BVI4	Qdpr	Dihydropteridine reductase	DHPR_MOUSE	0.908502	9.06566e-06	3.02207e-05	0.000567782
P24529	Th	Tyrosine 3-monooxygenase	TY3H_MOUSE	3.45906	9.08148e-06	3.02337e-05	0.00154169
P70207	Plxna2	Plexin-A2	PLXA2_MOUSE	-inf	9.08536e-06	3.02337e-05	8.36147e-06
Q9CPX6	Atg3	Ubiquitin-like-conjugating enzyme ATG3	ATG3_MOUSE	1.22353	9.08817e-06	3.02337e-05	8.64592e-05
Q8BQ47	Cnpy4	Protein canopy homolog 4	CNPY4_MOUSE	-inf	9.09081e-06	3.02337e-05	2.85928e-06
Q8BLC3	Lypd1	Ly6/PLAUR domain-containing protein 1	LYPD1_MOUSE	-inf	9.10015e-06	3.02471e-05	8.43113e-06
Q61464	Znf638	Zinc finger protein 638	ZN638_MOUSE	-inf	9.11485e-06	3.02611e-05	4.62671e-06
P60487	Pdxp	Pyridoxal phosphate phosphatase	PLPP_MOUSE	-1.82765	9.11498e-06	3.02611e-05	0.000245709
Q9Z280	Pld1	Phospholipase D1	PLD1_MOUSE	-inf	9.14063e-06	3.03286e-05	2.80039e-06
O54692	Zw10	Centromere/kinetochore protein zw10 homolog	ZW10_MOUSE	-inf	9.16287e-06	3.03847e-05	4.46738e-06
Q8R3Q0	Saraf	Store-operated calcium entry-associated regulatory factor	SARAF_MOUSE	-inf	9.22702e-06	3.05796e-05	2.51978e-06
G5E870	Trip12	E3 ubiquitin-protein ligase TRIP12	TRIPC_MOUSE	-inf	9.26075e-06	3.06621e-05	4.89178e-06
Q8BQU6	Gjc2	Gap junction gamma-2 protein	CXG2_MOUSE	-inf	9.26266e-06	3.06621e-05	2.48813e-06
P09602	Hmgn2	Non-histone chromosomal protein HMG-17	HMGN2_MOUSE	-inf	9.27112e-06	3.06722e-05	2.32782e-05
Q9JL26	Fmnl1	Formin-like protein 1	FMNL1_MOUSE	-inf	9.28764e-06	3.0691e-05	6.73077e-06
A2A432	Cul4b	Cullin-4B	CUL4B_MOUSE	-inf	9.29175e-06	3.0691e-05	1.81327e-05
P63143	Kcnab1	Voltage-gated potassium channel subunit beta-1	KCAB1_MOUSE	-inf	9.29755e-06	3.0691e-05	1.72143e-05
Q9Z1L5	Cacna2d3	Voltage-dependent calcium channel subunit alpha-2/delta-3	CA2D3_MOUSE	-5.56017	9.29833e-06	3.0691e-05	9.60387e-05
Q5U4F6	Wdr34	WD repeat-containing protein 34	WDR34_MOUSE	-inf	9.30853e-06	3.07068e-05	2.2506e-06
O35465	Fkbp8	Peptidyl-prolyl cis-trans isomerase FKBP8	FKBP8_MOUSE	-1.694	9.31441e-06	3.07084e-05	6.66626e-05
Q80U19	Daam2	Disheveled-associated activator of morphogenesis 2	DAAM2_MOUSE	-inf	9.35887e-06	3.08372e-05	9.51257e-06
Q8VDQ8	Sirt2	NAD-dependent protein deacetylase sirtuin-2	SIR2_MOUSE	-2.30238	9.38803e-06	3.09056e-05	0.000660281
Q9WUD8	Faim	Fas apoptotic inhibitory molecule 1	FAIM1_MOUSE	-inf	9.39048e-06	3.09056e-05	4.87068e-06
Q6WVG3	Kctd12	BTB/POZ domain-containing protein KCTD12	KCD12_MOUSE	-3.3086	9.44172e-06	3.10563e-05	9.27972e-05
Q8C050	Rps6ka5	Ribosomal protein S6 kinase alpha-5	KS6A5_MOUSE	-inf	9.45538e-06	3.10833e-05	1.97546e-05
Q8BGN8	Synpr	Synaptoporin	SYNPR_MOUSE	-inf	9.51595e-06	3.12643e-05	6.60388e-05
Q61206	Pafah1b2	Platelet-activating factor acetylhydrolase IB subunit beta	PA1B2_MOUSE	-0.767356	9.52321e-06	3.12701e-05	0.000298893
P97333	Nrp1	Neuropilin-1	NRP1_MOUSE	-inf	9.53626e-06	3.1295e-05	1.52545e-06
P42232	Stat5b	Signal transducer and activator of transcription 5B	STA5B_MOUSE	3.17786	9.54601e-06	3.13089e-05	4.94658e-05
Q6PD10	Ip6k1	Inositol hexakisphosphate kinase 1	IP6K1_MOUSE	-inf	9.57844e-06	3.13972e-05	3.04768e-06
Q9Z2N8	Actl6a	Actin-like protein 6A	ACL6A_MOUSE	-inf	9.61392e-06	3.14911e-05	4.79141e-06
Q6PD28	Ppp2r5b	Serine/threonine-protein phosphatase 2A 56 kDa regulatory subunit beta isoform	2A5B_MOUSE	-inf	9.62441e-06	3.14911e-05	2.94528e-05
P57759	Erp29	Endoplasmic reticulum resident protein 29	ERP29_MOUSE	-1.41596	9.62601e-06	3.14911e-05	0.000139014
Q05909	Ptprg	Receptor-type tyrosine-protein phosphatase gamma	PTPRG_MOUSE	-inf	9.62918e-06	3.14911e-05	5.08468e-06
Q5DTT2	Psd	PH and SEC7 domain-containing protein 1	PSD1_MOUSE	-inf	9.63745e-06	3.15e-05	1.63973e-05
P08775	Polr2a	DNA-directed RNA polymerase II subunit RPB1	RPB1_MOUSE	-inf	9.66005e-06	3.15383e-05	3.34543e-06
Q91WJ0	Frs3	Fibroblast growth factor receptor substrate 3	FRS3_MOUSE	2.88839	9.66474e-06	3.15383e-05	1.34786e-05
Q6PAM0	Prkab2	5'-AMP-activated protein kinase subunit beta-2	AAKB2_MOUSE	-inf	9.66577e-06	3.15383e-05	1.25192e-05
Q4VAA7	Snx33	Sorting nexin-33	SNX33_MOUSE	-inf	9.68457e-06	3.15783e-05	1.44231e-05
Q8VEB6	Elac1	Zinc phosphodiesterase ELAC protein 1	RNZ1_MOUSE	-inf	9.69054e-06	3.15783e-05	3.41939e-06
Q03265	Atp5f1a	ATP synthase subunit alpha, mitochondrial	ATPA_MOUSE	-2.15846	9.69467e-06	3.15783e-05	0.00321921
Q8CHH9	Septin8	Septin-8	SEPT8_MOUSE	-2.42713	9.71492e-06	3.16262e-05	0.000250038
Q8K382	Dennd1a	DENN domain-containing protein 1A	DEN1A_MOUSE	-inf	9.73812e-06	3.1672e-05	5.57531e-06
Q9Z2F7	Bnip3l	BCL2/adenovirus E1B 19 kDa protein-interacting protein 3-like	BNI3L_MOUSE	-inf	9.74173e-06	3.1672e-05	1.86347e-05
Q91VC3	Eif4a3	Eukaryotic initiation factor 4A-III	IF4A3_MOUSE	-inf	9.7483e-06	3.1672e-05	2.96177e-05
Q8BTV1	Tusc3	Tumor suppressor candidate 3	TUSC3_MOUSE	-inf	9.75122e-06	3.1672e-05	6.44148e-06
Q6ZPS6	Ankib1	Ankyrin repeat and IBR domain-containing protein 1	AKIB1_MOUSE	-inf	9.76524e-06	3.16995e-05	2.83201e-06
O55242	Sigmar1	Sigma non-opioid intracellular receptor 1	SGMR1_MOUSE	2.88487	9.80588e-06	3.18133e-05	3.19351e-05
P18052	Ptpra	Receptor-type tyrosine-protein phosphatase alpha	PTPRA_MOUSE	-inf	9.82787e-06	3.18665e-05	3.09042e-05
Q9CQ71	Rpa3	Replication protein A 14 kDa subunit	RFA3_MOUSE	-inf	9.83458e-06	3.18701e-05	4.22953e-06
Q8R0A5	Tceal3	Transcription elongation factor A protein-like 3	TCAL3_MOUSE	-inf	9.87912e-06	3.19962e-05	3.56178e-05
A2A8U2	Tmem201	Transmembrane protein 201	TM201_MOUSE	-inf	9.89634e-06	3.2016e-05	3.93129e-06
P23198	Cbx3	Chromobox protein homolog 3	CBX3_MOUSE	-inf	9.89759e-06	3.2016e-05	2.97192e-05
Q6PE01	Snrnp40	U5 small nuclear ribonucleoprotein 40 kDa protein	SNR40_MOUSE	-inf	9.90208e-06	3.2016e-05	8.86629e-06
Q9DC51	Gnai3	Guanine nucleotide-binding protein G(i) subunit alpha	GNAI3_MOUSE	-inf	9.92773e-06	3.20807e-05	3.3654e-05
Q6PD24	Ankrd13d	Ankyrin repeat domain-containing protein 13D	AN13D_MOUSE	-inf	9.95432e-06	3.21484e-05	6.41994e-06
Q9Z2B9	Rps6ka4	Ribosomal protein S6 kinase alpha-4	KS6A4_MOUSE	-inf	9.96835e-06	3.21755e-05	5.07243e-06
P01831	Thy1	Thy-1 membrane glycoprotein	THY1_MOUSE	-5.80712	9.99973e-06	3.22585e-05	0.00118377
Q9QXK3	Copg2	Coatomer subunit gamma-2	COPG2_MOUSE	-inf	1.00099e-05	3.2273e-05	1.35998e-05
Q80VP9	Asphd2	Aspartate beta-hydroxylase domain-containing protein 2	ASPH2_MOUSE	-inf	1.00305e-05	3.2321e-05	3.99827e-06
Q9D385	Arl2bp	ADP-ribosylation factor-like protein 2-binding protein	AR2BP_MOUSE	-inf	1.00766e-05	3.24515e-05	2.84134e-06
P62254	Ube2g1	Ubiquitin-conjugating enzyme E2 G1	UB2G1_MOUSE	-inf	1.00939e-05	3.24886e-05	7.56688e-06
Q7TPW1	Nexn	Nexilin	NEXN_MOUSE	-inf	1.01078e-05	3.25151e-05	1.77112e-05
P58059	Mrps21	28S ribosomal protein S21, mitochondrial	RT21_MOUSE	-inf	1.01187e-05	3.25249e-05	2.61005e-06
Q61120	Shc3	SHC-transforming protein 3	SHC3_MOUSE	-inf	1.01259e-05	3.25249e-05	1.07485e-05
Q9CPR7	Sike1	Suppressor of IKBKE 1	SIKE1_MOUSE	-inf	1.0128e-05	3.25249e-05	5.02401e-06
Q8R086	Suox	Sulfite oxidase, mitochondrial	SUOX_MOUSE	-inf	1.01555e-05	3.25948e-05	1.22901e-05
Q8BVL3	Snx17	Sorting nexin-17	SNX17_MOUSE	-inf	1.02053e-05	3.27362e-05	9.02394e-06
Q8BZN6	Dock10	Dedicator of cytokinesis protein 10	DOC10_MOUSE	-inf	1.02118e-05	3.27388e-05	9.31182e-06
Q6PB70	Ano8	Anoctamin-8	ANO8_MOUSE	-inf	1.02277e-05	3.27544e-05	3.31601e-06
Q3U0S6	Rasip1	Ras-interacting protein 1	RAIN_MOUSE	-inf	1.02286e-05	3.27544e-05	9.06518e-07
P56391	Cox6b1	Cytochrome c oxidase subunit 6B1	CX6B1_MOUSE	-6.15186	1.02348e-05	3.27544e-05	0.00165873
Q3TRM4	Pnpla6	Neuropathy target esterase	PLPL6_MOUSE	-inf	1.02415e-05	3.27544e-05	1.20007e-06
Q6P5F7	Ttyh3	Protein tweety homolog 3	TTYH3_MOUSE	1.22413	1.02472e-05	3.27544e-05	6.77723e-05
Q8VEK3	Hnrnpu	Heterogeneous nuclear ribonucleoprotein U	HNRPU_MOUSE	-3.86484	1.02512e-05	3.27544e-05	0.000212599
B9EJI9	Tmem229a	Transmembrane protein 229A	T229A_MOUSE	-inf	1.03297e-05	3.29867e-05	3.49926e-06
Q9JJG0	Tacc2	Transforming acidic coiled-coil-containing protein 2	TACC2_MOUSE	-inf	1.03398e-05	3.30006e-05	3.6889e-06
Q80XD1	Chn2	Beta-chimaerin	CHIO_MOUSE	-inf	1.03764e-05	3.30901e-05	5.94547e-06
Q5SSH7	Zzef1	Zinc finger ZZ-type and EF-hand domain-containing protein 1	ZZEF1_MOUSE	-inf	1.03795e-05	3.30901e-05	5.28366e-06
Q8R4G0	Ntng1	Netrin-G1	NTNG1_MOUSE	-inf	1.03935e-05	3.30966e-05	1.41637e-05
Q9CY73	Mrpl44	39S ribosomal protein L44, mitochondrial	RM44_MOUSE	-inf	1.03972e-05	3.30966e-05	4.78467e-06
Q61595	Ktn1	Kinectin	KTN1_MOUSE	-inf	1.0399e-05	3.30966e-05	1.61168e-05
P55937	Golga3	Golgin subfamily A member 3	GOGA3_MOUSE	-inf	1.04587e-05	3.3244e-05	4.99715e-06
Q8BGT5	Gpt2	Alanine aminotransferase 2	ALAT2_MOUSE	-inf	1.04588e-05	3.3244e-05	7.99692e-06
Q9CQN3	Tomm6	Mitochondrial import receptor subunit TOM6 homolog	TOM6_MOUSE	-inf	1.04628e-05	3.3244e-05	6.03778e-05
Q80W47	Wipi2	WD repeat domain phosphoinositide-interacting protein 2	WIPI2_MOUSE	3.66243	1.05057e-05	3.33522e-05	0.00026581
Q99PU8	Dhx30	ATP-dependent RNA helicase DHX30	DHX30_MOUSE	-inf	1.05124e-05	3.33522e-05	6.30739e-06
Q9CRA9	Fgfr1op2	FGFR1 oncogene partner 2 homolog	FGOP2_MOUSE	-inf	1.05174e-05	3.33522e-05	2.77565e-05
P11798	Camk2a	Calcium/calmodulin-dependent protein kinase type II subunit alpha	KCC2A_MOUSE	-1.84282	1.05251e-05	3.33522e-05	0.000905502
Q6PFR5	Tra2a	Transformer-2 protein homolog alpha	TRA2A_MOUSE	-inf	1.05261e-05	3.33522e-05	7.84757e-06
P21126	Ubl4a	Ubiquitin-like protein 4A	UBL4A_MOUSE	-inf	1.05399e-05	3.33773e-05	2.585e-05
Q5SU73	Coil	Coilin	COIL_MOUSE	-inf	1.0552e-05	3.33972e-05	3.06319e-06
P97291	Cdh8	Cadherin-8	CADH8_MOUSE	-inf	1.05587e-05	3.33996e-05	7.03454e-06
P38585	Ttl	Tubulin--tyrosine ligase	TTL_MOUSE	-inf	1.06292e-05	3.36012e-05	9.75549e-06
Q3TIU4	Pde12	2',5'-phosphodiesterase 12	PDE12_MOUSE	-inf	1.06342e-05	3.36012e-05	9.67459e-06
Q9QVP9	Ptk2b	Protein-tyrosine kinase 2-beta	FAK2_MOUSE	-inf	1.06589e-05	3.36606e-05	4.03105e-05
P25976	Ubtf	Nucleolar transcription factor 1	UBF1_MOUSE	-inf	1.06847e-05	3.37037e-05	5.61873e-06
Q62083	Pick1	PRKCA-binding protein	PICK1_MOUSE	2.13302	1.06938e-05	3.37037e-05	8.74216e-05
Q9D0I4	Stx17	Syntaxin-17	STX17_MOUSE	-inf	1.06942e-05	3.37037e-05	5.45724e-06
Q6ZQH8	Nup188	Nucleoporin NUP188 homolog	NU188_MOUSE	-inf	1.06962e-05	3.37037e-05	1.32186e-06
P62774	Mtpn	Myotrophin	MTPN_MOUSE	-1.67567	1.07077e-05	3.37211e-05	0.000262893
Q61097	Ksr1	Kinase suppressor of Ras 1	KSR1_MOUSE	-inf	1.07276e-05	3.37652e-05	7.32569e-06
Q8JZV7	Amdhd2	N-acetylglucosamine-6-phosphate deacetylase	NAGA_MOUSE	-inf	1.08634e-05	3.41737e-05	6.44356e-06
Q9WVF8	Tusc2	Tumor suppressor candidate 2	TUSC2_MOUSE	-inf	1.08725e-05	3.41835e-05	2.51156e-05
Q62384	Zpr1	Zinc finger protein ZPR1	ZPR1_MOUSE	-inf	1.08817e-05	3.41936e-05	3.1003e-06
Q07076	Anxa7	Annexin A7	ANXA7_MOUSE	4.33445	1.08948e-05	3.4216e-05	0.00159012
Q5M956	Kctd1;Kctd21	BTB/POZ domain-containing protein KCTD1;BTB/POZ domain-containing protein KCTD21	KCTD1_MOUSE;KCD21_MOUSE	-inf	1.09164e-05	3.42648e-05	6.85755e-06
Q925E7	Ppp2r2d	Serine/threonine-protein phosphatase 2A 55 kDa regulatory subunit B delta isoform	2ABD_MOUSE	-inf	1.09547e-05	3.4366e-05	1.05874e-05
Q9DCU6	Mrpl4	39S ribosomal protein L4, mitochondrial	RM04_MOUSE	-inf	1.10226e-05	3.45414e-05	9.15928e-06
P48193	Epb41	Protein 4.1	41_MOUSE	-inf	1.10227e-05	3.45414e-05	1.11791e-05
Q8VCY8	Plppr2	Phospholipid phosphatase-related protein type 2	PLPR2_MOUSE	-inf	1.10348e-05	3.45602e-05	8.68715e-06
Q99MR0	Actl6b	Actin-like protein 6B	ACL6B_MOUSE	-inf	1.10548e-05	3.4604e-05	1.33146e-05
P58854	Tubgcp3	Gamma-tubulin complex component 3	GCP3_MOUSE	-inf	1.10632e-05	3.46111e-05	3.64646e-06
Q02956	Prkcz	Protein kinase C zeta type	KPCZ_MOUSE	-inf	1.10954e-05	3.46559e-05	3.10567e-06
Q61334	Bcap29	B-cell receptor-associated protein 29	BAP29_MOUSE	-inf	1.10956e-05	3.46559e-05	1.10652e-05
Q99NF2	Nsmf	NMDA receptor synaptonuclear signaling and neuronal migration factor	NSMF_MOUSE	-inf	1.10957e-05	3.46559e-05	1.20211e-05
Q59J78	Ndufaf2	NADH dehydrogenase [ubiquinone] 1 alpha subcomplex assembly factor 2	NDUF2_MOUSE	-inf	1.11247e-05	3.47202e-05	4.53795e-05
Q9CPV3	Mrpl42	39S ribosomal protein L42, mitochondrial	RM42_MOUSE	-inf	1.11285e-05	3.47202e-05	3.38899e-06
Q61559	Fcgrt	IgG receptor FcRn large subunit p51	FCGRN_MOUSE	-inf	1.1152e-05	3.47521e-05	3.45236e-06
Q9DAT5	Trmu	Mitochondrial tRNA-specific 2-thiouridylase 1	MTU1_MOUSE	-inf	1.1158e-05	3.47521e-05	3.1399e-06
P09470	Ace	Angiotensin-converting enzyme	ACE_MOUSE	-inf	1.11585e-05	3.47521e-05	1.16956e-05
Q9D0B6	Pbdc1	Protein PBDC1	PBDC1_MOUSE	2.8804	1.1164e-05	3.47521e-05	0.000125377
[truncated: 3,867 more rows]
