# Supplementary material for: Subcellular proteomics of dopamine neurons in the mouse brain
Source: eLife. 2022 Jan 31;11:e70921. doi: 10.7554/eLife.70921 (PMC8860448; doi:10.7554/eLife.70921)
Supplement: Figure 3—source data 1. [file elife-70921-fig3-data1.xlsx]

## Sheet: Sheet1
Figure 3 -- source data 1
Protein abbreviations related to Figure 3d
“Dendrite / Postsynapse”
Abbrev. in panel d	Protein Name	Mouse Gene Symbol
GluA1	AMPA-selective glutamate receptor 1	Gria1
GluA3	AMPA-selective glutamate receptor 3	Gria3
PSD95	Disks large homolog 4	Dlg4
Homer1	Homer protein homolog 1	Homer1
Homer2	Homer protein homolog 2	Homer2
Shank1	SH3 and multiple ankyrin repeat domains protein 1	Shank1
Shank2	SH3 and multiple ankyrin repeat domains protein 2	Shank2
Shank3	SH3 and multiple ankyrin repeat domains protein 3	Shank3
MAP1A	Microtubule-associated protein 1A	Map1a
NR2B	Glutamate receptor ionotropic, NMDA 2B	Grin2b
NR2D	Glutamate receptor ionotropic, NMDA 2D	Grin2d
SAP102	Disks large homolog 3	Dlg3
DBN1	Drebrin	Dbn1
Tubulin α1B	Tubulin alpha-1B chain	Tuba1b
Tubulin α3	Tubulin alpha-3 chain	Tuba3a
Tubulin β1	Tubulin beta-1 chain	Tubb1
Tubulin β3	Tubulin beta-3 chain	Tubb3
Tubulin β4A	Tubulin beta-4A chain	Tubb4a
Tubulin β4B	Tubulin beta-4B chain	Tubb4b
Tubulin β5	Tubulin beta-5 chain	Tubb5
Kir3.2	G protein-activated inward rectifier potassium channel 2	Kcnj6
GABA-A R α1	Gamma-aminobutyric acid receptor subunit alpha-1	Gabra1
GABA-A R α3	Gamma-aminobutyric acid receptor subunit alpha-3	Gabra3
GABA-A R β1	Gamma-aminobutyric acid receptor subunit beta-1	Gabrb1
GABA-A R β2	Gamma-aminobutyric acid receptor subunit beta-2	Gabrb2
GABA-A R β3	Gamma-aminobutyric acid receptor subunit beta-3	Gabrb3
Gephyrin	Gephyrin	Gphn
GABA-B R1	Gamma-aminobutyric acid type B receptor subunit 1	Gabbr1
MAP2	Microtubule-associated protein 2	Map2
“Cytoskeleton / Transport”
Abbrev. in panel d	Protein Name	Mouse Gene Symbol
CDK5	Cyclin-dependent-like kinase 5	Cdk5
Tau	Microtubule-associated protein tau	Mapt
MADD	MAP kinase-activating death domain protein	Madd
Liprin-α2	Liprin-alpha-2	Ppfia2
JNK1	Mitogen-activated protein kinase 8	Mapk8
JIP3	C-Jun-amino-terminal kinase-interacting protein 3	Mapk8ip3
JIP1	C-Jun-amino-terminal kinase-interacting protein 1	Mapk8ip1
KLC1	Kinesin light chain 1	Klc1
KLC2	Kinesin light chain 2	Klc2
KIF5A	Kinesin heavy chain isoform 5A	Kif5a
KIF5B	Kinesin heavy chain isoform 5B	Kif5b
DLC1	Dynein light chain 1, cytoplasmic	Dynll1
DLC2	Dynein light chain 2, cytoplasmic	Dynll2
DHC1	Cytoplasmic dynein 1 heavy chain 1	Dync1h1
LIS-1	Platelet-activating factor acetylhydrolase IB subunit beta	Pafah1b1
DCTN1	Dynactin subunit 1	Dctn1
Arl8b	ADP-ribosylation factor-like protein 8B	Arl8b
Snapin	SNARE-associated protein Snapin	Snapin
KIF1A	Kinesin-like protein KIF1A	Kif1a
ADDα	Alpha-adducin	Add1
CDC42	Cell division control protein 42 homolog	Cdc42
WAVE1	Wiskott-Aldrich syndrome protein family member 1	Wasf1
WAVE3	Wiskott-Aldrich syndrome protein family member 3	Wasf3
γ-actin	Actin, cytoplasmic 2	Actg1
β-actin	Actin, cytoplasmic 1	Actb
RAC1	Ras-related C3 botulinum toxin substrate 1	Rac1
ARP2	Actin-related protein 2	Actr2
ARP3	Actin-related protein 3	Actr3
GAP43	Neuromodulin	Gap43
AnkB	Ankyrin-2 / Ankyrin-B	Ank2
β2-spectrin	Spectrin beta chain, non-erythrocytic 1	Sptbn1
Formin-2	Formin-2	Fmn2
“RNA Binding”
Abbrev. in panel d	Protein Name	Mouse Gene Symbol
eIF4G-I	Eukaryotic translation initiation factor 4 gamma 1	Eif4g1
eIF4A-I	Eukaryotic initiation factor 4A-I	Eif4a1
eIF4A-II	Eukaryotic initiation factor 4A-II	Eif4a2
eIF4E	Eukaryotic translation initiation factor 4E	Eif4e
eIF2α	Eukaryotic translation initiation factor 2 subunit 1	Eif2s1
eIF3-C	Eukaryotic translation initiation factor 3 subunit C	Eif3c
eIF3-E	Eukaryotic translation initiation factor 3 subunit E	Eif3e
eIF3-L	Eukaryotic translation initiation factor 3 subunit L	Eif3l
eIF3-I	Eukaryotic translation initiation factor 3 subunit I	Eif3i
eIF3-G	Eukaryotic translation initiation factor 3 subunit G	Eif3g
TDP-43	TAR DNA-binding protein 43	Tardbp
ATXN2	Ataxin-2	Atxn2
FUS	RNA-binding protein FUS	Fus
CELF4	CUGBP Elav-like family member 4	Celf4
HuD	ELAV-like protein 4	Elavl4
FMRP	Synaptic functional regulator FMR1	Fmr1
FXR1	Fragile X mental retardation syndrome-related protein 1	Fxr1
EEF2	Elongation factor 2	Eef2
EEF1α-1	Elongation factor 1-alpha 1	Eef1a1
EEF1α-2	Elongation factor 1-alpha 2	Eef1a2
EEF1γ	Elongation factor 1-gamma	Eef1g
“Proteasome”				* Proteasome nomenclature as per systematic nomenclature in Table 2 of Tanaka et al. (2009)
Abbrev. in panel d	Protein Name	Mouse Gene Symbol
α1	Proteasome subunit α1	Psma6
α2	Proteasome subunit α2	Psma2
α3	Proteasome subunit α3	Psma4		Tanaka, K. (2009). The proteasome: Overview of structure and functions. Proceedings of the Japan Academy. Series B, Physical and Biological Sciences, 85(1), 12–36. https://doi.org/10.2183/pjab.85.12
α4	Proteasome subunit α4	Psma7
α5	Proteasome subunit α5	Psma5
α6	Proteasome subunit α6	Psma1
α7	Proteasome subunit α7	Psma3
β2	Proteasome subunit β2	Psmb7
β3	Proteasome subunit β3	Psmb3
β5	Proteasome subunit β5	Psmb5
Rpt1	ATPase subunit RPT1	Psmc2
Rpt2	ATPase subunit RPT2	Psmc1
Rpt3	ATPase subunit RPT3	Psmc4
Rpt4	ATPase subunit RPT4	Psmc6
Rpt6	ATPase subunit RPT6	Psmc5
Rpn10	Non-ATPase subunit RPN10	Psmd4
Rpn9	Non-ATPase subunit RPN9	Psmd13
Rpn12	Non-ATPase subunit RPN12	Psmd8
Rpn6	Non-ATPase subunit RPN6	Psmd11
Rpn3	Non-ATPase subunit RPN3	Psmd3
Rpn7	Non-ATPase subunit RPN7	Psmd6
“Autophagy”
Abbrev. in panel d	Protein Name	Mouse Gene Symbol
TSC1	Hamartin	Tsc1
TSC2	Tuberin	Tsc2
Rheb	GTP-binding protein Rheb	Rheb
mTOR	Serine/threonine-protein kinase mTOR	Mtor
Raptor	Regulatory-associated protein of mTOR	Rptor
AMPKα1	5'-AMP-activated protein kinase catalytic subunit alpha-1	Prkaa1
ULK2	Serine/threonine-protein kinase ULK2	Ulk2
VPS15	Phosphoinositide 3-kinase regulatory subunit 4	Pik3r4
BIF-1	Endophilin-B1	Sh3glb1
UVRAG	UV radiation resistance-associated protein	Uvrag
TAPL	ATP-binding cassette sub-family B member 9	Abcb9
LAMTOR3	Ragulator complex protein LAMTOR3	Lamtor3
Gate-16	Gamma-aminobutyric acid receptor-associated protein-like 2	Gabarapl2
LC3A	Microtubule-associated proteins 1A/1B light chain 3A	Map1lc3a
p62	Sequestosome-1	Sqstm1
WIPI2	WD repeat domain phosphoinositide-interacting protein 2	Wipi2
ATG3	Ubiquitin-like-conjugating enzyme ATG3	Atg3
ATG7	Ubiquitin-like-conjugating enzyme ATG7	Atg7
VMP1	Vacuole membrane protein 1	Vmp1
TECPR1	Tectonin beta-propeller repeat-containing protein 1	Tecpr1
SNAP29	Synaptosomal-associated protein 29	Snap29
“Endocytosis”
Abbrev. in panel d	Protein Name	Mouse Gene Symbol
DNM1	Dynamin-1	Dnm1
DNM2	Dynamin-2	Dnm2
CALM	Phosphatidylinositol-binding clathrin assembly protein	Picalm
AP180	Clathrin coat assembly protein AP180	Snap91
AP2 α1	AP-2 complex subunit alpha-1	Ap2a1
AP2 α2	AP-2 complex subunit alpha-2	Ap2a2
AP2 β1	AP-2 complex subunit beta	Ap2b1
AP2 μ	AP-2 complex subunit mu	Ap2m1
Endophilin A1	Endophilin-A1	Sh3gl2
Endophilin A2	Endophilin-A2	Sh3gl1
Clathrin LCa	Clathrin light chain A	Clta
Clathrin LCb	Clathrin light chain B	Cltb
Clathrin HC1	Clathrin heavy chain 1	Cltc
SGIP1	SH3-containing GRB2-like protein 3-interacting protein 1	Sgip1
Epsin1	Epsin-1	Epn1
Auxilin	Putative tyrosine-protein phosphatase auxilin	Dnajc6
SYNJ1	Synaptojanin-1	Synj1
Hsc70	Heat shock cognate 71 kDa protein	Hspa8
“Glycolysis”
Abbrev. in panel d	Protein Name	Mouse Gene Symbol
HK1	Hexokinase-1	Hk1
PGI	Glucose-6-phosphate isomerase	Gpi
PFK-P	ATP-dependent 6-phosphofructokinase	Pfkp
Aldo1	Fructose-bisphosphate aldolase A	Aldoa
GAPDH	Glyceraldehyde-3-phosphate dehydrogenase	Gapdh
PGK1	Phosphoglycerate kinase 1	Pgk1
PGM1	Phosphoglucomutase-1	Pgam1
Eno-α	Alpha-enolase	Eno1
Eno-γ	Gamma-enolase	Eno2
PKM	Pyruvate kinase PKM	Pkm
