# Supplementary material for: Subcellular proteomics of dopamine neurons in the mouse brain
Source: eLife. 2022 Jan 31;11:e70921. doi: 10.7554/eLife.70921 (PMC8860448; doi:10.7554/eLife.70921)
Supplement: Figure 3—source data 2. [file elife-70921-fig3-data2.xlsx]

## Sheet: APEX2_Unfiltered
ProteinAccessions	Genes	ProteinDescriptions	ProteinNames	VM_Ctrl_Log2_avg	MFB_Ctrl_Log2_avg	Str_Ctrl_Log2_avg	Syn_Ctrl_Log2_avg	VM_APEX2_Log2_avg	MFB_APEX2_Log2_avg	Str_APEX2_Log2_avg	Syn_APEX2_Log2_avg	VM_APEX_v_Ctrl	VM_APEX_v_Ctrl_Log2FC	VM_APEX_v_Ctrl_pvalue	VM_APEX_v_Ctrl_qvalue	MFB_APEX_v_Ctrl	MFB_APEX_v_Ctrl_Log2FC	MFB_APEX_v_Ctrl_pvalue	MFB_APEX_v_Ctrl_qvalue	Str_APEX_v_Ctrl	Str_APEX_v_Ctrl_Log2FC	Str_APEX_v_Ctrl_pvalue	Str_APEX_v_Ctrl_qvalue	Syn_APEX_v_Ctrl	Syn_APEX_v_Ctrl_Log2FC	Syn_APEX_v_Ctrl_pvalue	Syn_APEX_v_Ctrl_qvalue	APEX_VM_v_Str_Log2FC	APEX_VM_v_Str_pvalue	APEX_VM_v_Str_qvalue	scRNA_DA_Log2CPM	scRNA_DAN_vs_VM_Log2FC	scRNA_DAN_vs_VM_FDR	scRNA_DAN_vs_STR_Log2FC	scRNA_DAN_vs_STR_FDR
A1L314	Mpeg1	Macrophage-expressed gene 1 protein	MPEG1_MOUSE	0	0	0	4.94184	0	0	0	4.8494	NotSig				NotSig				NotSig				NotSig	-0.121474	0.699267	0.754374
A2A690;A2A690-2	Tanc2	Protein TANC2;Isoform 2 of Protein TANC2	TANC2_MOUSE	0	2.13617	0	3.6272	4.79621	4.1943	6.44411	5.60754	Enrich	inf	0.000452581	0.00166705	NotSig	1.02627	0.196774	0.293788	Enrich	inf	4.99872e-05	0.000569659	NotSig	1.69923	0.0512013	0.0912084	1.63588	0.00427952	0.0200403	8.47582	1.58495	1.25132e-36	1.26504	8.08431e-42
A2A699	Fam171a2	Protein FAM171A2	F1712_MOUSE	0	0	0	1.55295	5.11337	3.96935	6.16124	5.40921	Enrich	inf	2.64374e-05	0.000259465	Enrich	inf	0.000175047	0.00312499	Enrich	inf	6.90682e-05	0.000569659	NotSig	3.476	0.0190794	0.0538618	1.09257	0.00597905	0.0244398	5.97843	1.93524	6.07373e-10	0.321947	0.33928
A2A8Z1;A2A8Z1-2	Osbpl9	Oxysterol-binding protein-related protein 9;Isoform 2 of Oxysterol-binding protein-related protein 9	OSBL9_MOUSE	0	0	0	0	3.44753	0	5.03796	4.06017	NotSig	inf	0.0585566	0.0966099	NotSig				Enrich	inf	0.000165636	0.000676142	NotSig	inf	0.0453796	0.0842586	0.896755	0.263804	0.355258	5.97062	0.375748	0.000142827	0.814363	1.68584e-07
A2ADY9	Ddi2	Protein DDI1 homolog 2	DDI2_MOUSE	0	0	0	0	4.14793	2.48623	5.5639	4.76941	Enrich	inf	2.7344e-05	0.000263846	NotSig	inf	0.0589234	0.145715	Enrich	inf	0.000167677	0.000678542	NotSig	inf	0.0330742	0.0700614	1.51154	0.00527907	0.0228051	6.15578	1.01862	1.40883e-07	1.251	2.00708e-09
A2AG50	Map7d2	MAP7 domain-containing protein 2	MA7D2_MOUSE	0	0	0	0	6.87971	7.05893	6.15133	4.47776	Enrich	inf	1.79548e-05	0.000215098	Enrich	inf	8.45056e-05	0.00287315	Enrich	inf	9.34439e-05	0.000590983	NotSig	inf	0.0274332	0.0633647	-0.711286	0.0347989	0.079927	10.744	1.75385	1.27485e-145	2.13702	1.1755e-226
A2AGT5;A2AGT5-2;A2AGT5-3	Ckap5	Cytoskeleton-associated protein 5;Isoform 2 of Cytoskeleton-associated protein 5;Isoform 3 of Cytoskeleton-associated protein 5	CKAP5_MOUSE	0.614726	0	0.722365	2.00455	5.2461	4.39241	5.39364	5.33596	Enrich	5.16767	0.00143834	0.00430406	Enrich	inf	0.00120992	0.00814781	Enrich	4.74481	0.00463434	0.00968385	Enrich	3.24036	0.0149996	0.0487495	0.088168	0.750505	0.799397	6.40681	-0.473773	0.781254	-0.38661	0.636103
A2AHC3	Camsap1	Calmodulin-regulated spectrin-associated protein 1	CAMP1_MOUSE	0	0	0	1.23986	4.32673	2.34793	5.38146	4.81263	Enrich	inf	0.000629882	0.00218158	NotSig	inf	0.187151	0.288676	Enrich	inf	0.000140662	0.000633111	NotSig	1.84832	0.0634084	0.107633	1.05828	0.0282264	0.0694029	7.05549	0.86731	1.97125e-13	1.06121	6.10467e-12
A2AJA9	Ajm1	Apical junction component 1 homolog	AJM1_MOUSE	0	0	0	5.84982	5.9571	4.68018	5.73959	5.94042	Enrich	inf	0.000198867	0.000854508	NotSig	inf	0.0593403	0.145715	Enrich	inf	8.72233e-05	0.000580051	NotSig	0.0827939	0.446297	0.55523	-0.250287	0.538503	0.607811
A2AJI0	Map7d1	MAP7 domain-containing protein 1	MA7D1_MOUSE	0	0	0	1.14371	6.92405	5.77933	6.65418	6.7855	Enrich	inf	8.77092e-07	0.00010487	Enrich	inf	0.000140424	0.00300666	Enrich	inf	0.000115973	0.000599543	Enrich	4.27091	0.0147684	0.0484807	-0.21564	0.361939	0.45482	7.78005	-0.881091	0.000376359	0.496781	8.72133e-10
A2AKB4	Frmpd1	FERM and PDZ domain-containing protein 1	FRPD1_MOUSE	14.114	13.2336	15.6	13.7967	14.5373	13.2115	9.90366	10.5393	NotSig	-0.124399	0.639413	0.686334	NotSig	-0.238108	0.970762	0.977066	Deplete	-5.17345	0.00230693	0.00527798	NotSig	-2.39475	0.325806	0.433431	-3.90729	0.0100022	0.0347848	4.43204	-1.24997	0.415235	4.16404	9.18226e-13
A2ALS5;A2ALS5-2;A2ALS5-3	Rap1gap	Rap1 GTPase-activating protein 1;Isoform 2 of Rap1 GTPase-activating protein 1;Isoform 3 of Rap1 GTPase-activating protein 1	RPGP1_MOUSE	0	0	0.842318	0	6.94213	5.51992	7.26971	6.4264	Enrich	inf	9.88527e-06	0.00017164	Enrich	inf	0.000394506	0.00437782	Enrich	6.07727	0.00348022	0.00758719	Enrich	inf	0.0152323	0.0489712	0.355661	0.216627	0.30433	7.47161	1.75756	3.27543e-25	0.118916	0.375227
A2ALU4;A2ALU4-2	Shroom2	Protein Shroom2;Isoform 2 of Protein Shroom2	SHRM2_MOUSE	0	0	0	0	5.57836	4.35426	6.26096	5.13263	Enrich	inf	3.60137e-05	0.00030757	Enrich	inf	0.00104703	0.00740718	Enrich	inf	4.94532e-05	0.000569659	NotSig	inf	0.0413293	0.0794099	0.703274	0.0249723	0.0636048	4.7977	-1.3179	0.0499896	-0.688305	0.00160013
A2AN08;A2AN08-3;A2AN08-5	Ubr4	E3 ubiquitin-protein ligase UBR4;Isoform 3 of E3 ubiquitin-protein ligase UBR4;Isoform 5 of E3 ubiquitin-protein ligase UBR4	UBR4_MOUSE	0	0	0	0.31815	4.54559	2.61935	4.97868	5.0486	Enrich	inf	0.00138258	0.00417813	NotSig	inf	0.0666585	0.147698	Enrich	inf	0.000286737	0.000943403	Enrich	6.52318	0.000421097	0.0116899	0.340389	0.395276	0.473087	7.93569	1.64482	1.84478e-38	2.85807	1.01475e-75
A2APX8;A2APX8-2;A2APX8-3	Scn1a	Sodium channel protein type 1 subunit alpha;Isoform 2 of Sodium channel protein type 1 subunit alpha;Isoform 3 of Sodium channel protein type 1 subunit alpha	SCN1A_MOUSE	1.81101	0	0	3.42778	4.77123	3.97559	5.69452	5.50682	NotSig	1.96795	0.0736624	0.112104	Enrich	inf	0.00126202	0.00837154	Enrich	inf	0.000219492	0.000785374	Enrich	2.17298	0.000357612	0.0114472	0.98876	0.033283	0.0776234	6.8417	-0.090968	0.00140537	0.429417	0.0929712
A2AQ07	Tubb1	Tubulin beta-1 chain	TBB1_MOUSE	7.60567	8.05553	7.42172	7.67756	11.7824	10.3317	10.5823	10.6398	Enrich	4.08679	0.000887056	0.00289372	Enrich	2.28267	0.00224587	0.01242	Enrich	3.19873	8.29527e-05	0.000574046	Enrich	2.93575	0.00466143	0.0261137	-1.15262	0.0120836	0.0391164
A2AQ25;A2AQ25-2;A2AQ25-3;A2AQ25-4;A2AQ25-5;A2AQ25-6;A2AQ25-8;A2AQ25-9	Skt	Sickle tail protein;Isoform 2 of Sickle tail protein;Isoform 3 of Sickle tail protein;Isoform 4 of Sickle tail protein;Isoform 5 of Sickle tail protein;Isoform 6 of Sickle tail protein;Isoform 8 of Sickle tail protein;Isoform 9 of Sickle tail protein	SKT_MOUSE	0	0	0	0	2.43635	0	4.15216	3.45239	NotSig	inf	0.0589283	0.0966099	NotSig				Enrich	inf	0.000239614	0.000830255	NotSig	inf	0.07879	0.128171	1.42303	0.125095	0.198806
A2ARP1;A2ARP1-2;A2ARP1-3;A2ARP1-7	Ppip5k1	Inositol hexakisphosphate and diphosphoinositol-pentakisphosphate kinase 1;Isoform 2 of Inositol hexakisphosphate and diphosphoinositol-pentakisphosphate kinase 1;Isoform 3 of Inositol hexakisphosphate and diphosphoinositol-pentakisphosphate kinase 1;Isoform 6 of Inositol hexakisphosphate and diphosphoinositol-pentakisphosphate kinase 1	VIP1_MOUSE	0	0	0	0	4.95003	1.85274	4.05625	3.46997	Enrich	inf	0.000168782	0.000769738	NotSig	inf	0.186565	0.288495	Enrich	inf	0.000382101	0.00116251	NotSig	inf	0.0649706	0.109623	-0.927273	0.027998	0.069194	6.15536	1.29488	1.8971e-10	2.44934	3.94556e-24
A2ARS0	Ankrd63	Ankyrin repeat domain-containing protein 63	ANR63_MOUSE	0	0.994267	4.50018	6.10605	0	0.921399	5.58921	6.38517	NotSig				NotSig	-0.313541	0.958885	0.969455	NotSig	-0.220225	0.539644	0.567952	NotSig	0.179036	0.653784	0.717325	inf	0.00010038	0.00303055	0			#NAME?	4.23231e-41
A2AWA9	Rabgap1	Rab GTPase-activating protein 1	RBGP1_MOUSE	0	0	1.22826	1.19598	5.23696	2.23262	5.15958	5.27806	Enrich	inf	0.000337784	0.00131488	NotSig	inf	0.182665	0.288495	NotSig	2.33156	0.0459172	0.0665335	NotSig	2.51999	0.040684	0.0785457	-0.0849617	0.851678	0.880714	6.72467	0.390614	3.79405e-05	0.524691	2.49719e-07
A2CG49;A2CG49-2;A2CG49-7	Kalrn	Kalirin;Isoform 2 of Kalirin;Isoform 7 of Kalirin	KALRN_MOUSE	0	0	1.17469	0.666806	3.3879	0.855312	4.21888	4.36785	Enrich	inf	0.00101315	0.00323972	NotSig	inf	0.391002	0.454376	NotSig	1.54263	0.0789268	0.104592	Enrich	3.88011	0.0105424	0.041138	0.871577	0.0499488	0.104359	5.46375	1.20264	1.99181e-05	-0.864488	1.72155e-10
A2RT62	Fbxl16	F-box/LRR-repeat protein 16	FXL16_MOUSE	0	0	1.10623	2.26243	5.86099	4.4747	6.39332	5.34836	Enrich	inf	1.87932e-05	0.000217148	Enrich	inf	0.00152482	0.00932571	Enrich	4.04132	0.016491	0.0280955	NotSig	2.84236	0.0273042	0.0632092	0.546129	0.0317465	0.0751836
A3KMP2;A3KMP2-2	Ttc38	Tetratricopeptide repeat protein 38;Isoform 2 of Tetratricopeptide repeat protein 38	TTC38_MOUSE	3.54185	2.84014	2.41412	4.53963	1.56706	3.95695	3.70163	4.93646	NotSig	-1.67721	0.115591	0.167567	NotSig	0.637429	0.359988	0.454376	NotSig	0.852105	0.230365	0.269322	NotSig	0.314592	0.284402	0.386396	1.66159	0.097291	0.164655	3.88221	-0.473709	0.732466	1.03707	0.0451801
A6H5Z3	Exoc6b	Exocyst complex component 6B	EXC6B_MOUSE	0	0	0	0	5.08031	1.11619	4.74739	4.53106	Enrich	inf	0.000126126	0.000625329	NotSig	inf	0.391002	0.454376	Enrich	inf	0.000240992	0.000833276	NotSig	inf	0.0221463	0.0573763	-0.329858	0.311088	0.402483	5.89709	0.285623	0.319087	1.15911	9.32087e-12
A6H6A9	Rabgap1l	Rab GTPase-activating protein 1-like	RBG1L_MOUSE	0	0	0	0	6.07492	2.42568	4.34397	4.55414	Enrich	inf	4.93657e-05	0.000363568	NotSig	inf	0.181944	0.288495	Enrich	inf	0.00029061	0.00095178	NotSig	inf	0.0389727	0.076464	-1.75701	0.00104363	0.0087039	7.37375	1.02665	4.37999e-17	0.796826	7.85634e-15
B0V2N1;B0V2N1-2;B0V2N1-3;B0V2N1-4;B0V2N1-6	Ptprs	Receptor-type tyrosine-protein phosphatase S;Isoform 2 of Receptor-type tyrosine-protein phosphatase S;Isoform 3 of Receptor-type tyrosine-protein phosphatase S;Isoform 4 of Receptor-type tyrosine-protein phosphatase S;Isoform 6 of Receptor-type tyrosine-protein phosphatase S	PTPRS_MOUSE	0	0	0	0.749572	1.60184	0.799185	6.65033	6.19432	NotSig	inf	0.181875	0.245991	NotSig	inf	0.391002	0.454376	Enrich	inf	4.41974e-05	0.000569659	Enrich	5.37525	0.004618	0.0261137	4.6297	0.0105328	0.035819	9.54805	1.76304	3.95026e-92	2.49005	3.98245e-177
B1AUH1;B1AUH1-2	Ptpru	Receptor-type tyrosine-protein phosphatase U;Isoform 2 of Receptor-type tyrosine-protein phosphatase U	PTPRU_MOUSE	0	0	0	0	0	0.558809	5.10469	4.40314	NotSig				NotSig	inf	0.391002	0.454376	Enrich	inf	5.89308e-05	0.000569659	NotSig	inf	0.0166847	0.0507299	inf	5.89308e-05	0.00242592	7.62399	3.8816	1.11074e-48	5.61099	2.50123e-106
B1AVZ0	Uprt	Uracil phosphoribosyltransferase homolog	UPP_MOUSE	0	0	0	0	4.32228	0	0	0	Enrich	inf	5.22687e-05	0.000376326	NotSig				NotSig								#NAME?	5.22687e-05	0.00241353	1.44313	2.31705	0.646818	0.889503	0.606531
B1AWN6	Scn2a	Sodium channel protein type 2 subunit alpha	SCN2A_MOUSE	3.52124	2.51267	0	5.80222	6.16923	6.49515	8.67834	8.55412	NotSig	1.87384	0.114495	0.166066	NotSig	3.50552	0.0195326	0.0681847	Enrich	inf	2.97353e-05	0.000569659	Enrich	2.76001	0.000762141	0.0132077	2.50728	0.000327532	0.00515151
B1AXV0	Frrs1l	DOMON domain-containing protein FRRS1L	FRS1L_MOUSE	0	0	2.02683	5.88031	2.34291	1.68096	2.61129	5.98682	NotSig	inf	0.182195	0.245991	NotSig	inf	0.189252	0.289316	NotSig	-0.448155	0.660311	0.686886	NotSig	0.0310003	0.72291	0.774685	-1.12526	0.858776	0.886024	8.46843	1.41636	4.83724e-40	-0.183261	0.572578
B1AY13	Usp24	Ubiquitin carboxyl-terminal hydrolase 24	UBP24_MOUSE	0	0	0	0.571165	4.84047	2.68183	5.76274	5.41444	Enrich	inf	0.00104526	0.00331926	NotSig	inf	0.074015	0.15763	Enrich	inf	0.000125179	0.000605082	Enrich	5.4418	0.00196293	0.0169778	0.84321	0.0922536	0.158918	5.6445	0.396791	0.102294	1.09809	2.82413e-05
B1AZP2;B1AZP2-2	Dlgap4	Disks large-associated protein 4;Isoform 2 of Disks large-associated protein 4	DLGP4_MOUSE	0	0	0	1.3265	5.32821	3.69793	6.20478	5.13552	Enrich	inf	1.31154e-05	0.000196019	Enrich	inf	0.000988181	0.00706603	Enrich	inf	9.61111e-05	0.000590983	Enrich	3.63814	0.0130942	0.0457809	0.928539	0.0203102	0.0558192	7.3555	0.847927	1.47793e-12	0.644478	3.79447e-07
B2RSH2	Gnai1	Guanine nucleotide-binding protein G(i) subunit alpha-1	GNAI1_MOUSE	4.16712	4.59397	3.16051	5.37481	6.82041	5.7872	7.16786	7.47899	Enrich	2.67209	0.000918751	0.00297593	NotSig	1.17984	0.0502074	0.139344	NotSig	3.31484	0.0347875	0.052474	Enrich	2.07706	0.00181814	0.0163238	0.354409	0.0197219	0.054777	6.95875	-0.969345	0.0374415	0.07335	0.000293311
B2RUJ5;B2RUJ5-3	Apba1	Amyloid-beta A4 precursor protein-binding family A member 1;Isoform 3 of Amyloid-beta A4 precursor protein-binding family A member 1	APBA1_MOUSE	0	0.79294	0	4.32465	7.88672	7.25013	10.021	8.9014	Enrich	inf	3.43449e-05	0.000300791	Enrich	6.28243	0.00265959	0.0138989	Enrich	inf	2.57149e-05	0.000569659	Enrich	3.90347	0.008165	0.035132	2.15052	0.000430688	0.00577711
B8JK39	Itga9	Integrin alpha-9	ITA9_MOUSE	7.8755	8.36155	7.92341	8.77719	7.50625	7.81074	7.04391	8.86546	NotSig	-0.53013	0.528034	0.579678	NotSig	-0.342136	0.518572	0.571181	NotSig	-1.06763	0.225376	0.26392	NotSig	0.0249067	0.789506	0.829645	-0.450351	0.282821	0.374249	2.53162	-1.50859	1	-2.54981	1.89919e-10
B9EJ80	Pdzd8	PDZ domain-containing protein 8	PDZD8_MOUSE	0	0	0	2.27431	6.10096	4.85039	5.48343	5.15167	Enrich	inf	1.60547e-05	0.000203984	Enrich	inf	0.00238561	0.0128196	Enrich	inf	0.000210513	0.000767169	NotSig	2.59353	0.0330198	0.070015	-0.578925	0.0859976	0.150628
B9EJ86	Osbpl8	Oxysterol-binding protein-related protein 8	OSBL8_MOUSE	0	0	1.15539	2.04781	6.32887	4.32934	5.14859	4.61999	Enrich	inf	4.64e-06	0.000146061	Enrich	inf	0.00179314	0.01046	Enrich	3.8838	0.010449	0.0191676	NotSig	2.44875	0.0322799	0.0693763	-1.17856	0.00329973	0.0169316	5.8822	0.892106	0.00164846	-2.1508	5.38037e-55
B9EKR1	Ptprz1	Receptor-type tyrosine-protein phosphatase zeta	PTPRZ_MOUSE	2.48561	4.20801	2.89675	6.62526	9.22282	6.74319	5.52156	5.86772	Enrich	6.04264	0.0108982	0.023748	NotSig	1.43818	0.183292	0.288495	NotSig	0.725303	0.218848	0.25659	NotSig	-0.733628	0.364975	0.478073	-4.45073	0.0211168	0.0571793	7.96316	-1.51824	0.0696645	0.847414	9.57985e-60
D3YVE8	Slc35g2	Solute carrier family 35 member G2	S35G2_MOUSE	1.15945	0.918114	0	2.50247	3.91346	3.82992	6.20403	5.27994	NotSig	1.25796	0.0970307	0.142998	NotSig	2.24631	0.0453623	0.128385	Enrich	inf	1.47216e-05	0.000569659	NotSig	2.45487	0.0439971	0.082837	2.36158	2.48627e-05	0.00241353	5.63835	1.71891	2.75682e-08	1.4665	1.17566e-11
D3YVF0	Akap5	A-kinase anchor protein 5	AKAP5_MOUSE	0	0	4.28573	5.71598	4.50126	1.65003	4.88402	6.06636	Enrich	inf	4.35474e-05	0.000346359	NotSig	inf	0.182218	0.288495	NotSig	0.524622	0.297568	0.340265	NotSig	0.294665	0.245687	0.340713	0.467509	0.297729	0.389349	3.38938	0.731817	0.0608585	-4.87478	4.35042e-126
D3YZP9	Ccdc6	Coiled-coil domain-containing protein 6	CCDC6_MOUSE	0	3.01533	1.75002	2.02011	5.919	5.5918	6.98604	5.99763	Enrich	inf	1.68175e-06	0.000123389	NotSig	0.0224987	0.252397	0.357305	NotSig	2.03409	0.056827	0.0802741	NotSig	2.74208	0.0456501	0.0846454	1.12476	0.0149718	0.0446685	6.1153	1.22095	1.40889e-09	1.60462	2.32453e-10
D3YZU1	Shank1	SH3 and multiple ankyrin repeat domains protein 1	SHAN1_MOUSE	0	0	0	0.545998	6.5898	3.22204	4.73662	4.10149	Enrich	inf	1.65453e-05	0.000205881	NotSig	inf	0.0629203	0.145715	Enrich	inf	4.71725e-05	0.000569659	Enrich	4.19881	0.00535551	0.0279963	-1.89222	5.63146e-05	0.00241353	4.57013	1.73271	0.00101529	2.72125	3.34854e-11
D3Z4S3	Ptrhd1	Putative peptidyl-tRNA hydrolase PTRHD1	PTRD1_MOUSE	0	0	0	0.628517	0	0	6.1662	5.0202	NotSig				NotSig				Enrich	inf	4.57201e-05	0.000569659	Enrich	4.7632	0.00357032	0.0222667	inf	4.57201e-05	0.00241353	3.39783	-0.71603	0.0220082	-1.52817	1.20082e-05
D3Z7P3	Gls	Glutaminase kidney isoform, mitochondrial	GLSK_MOUSE	4.70978	5.06137	4.44555	6.74123	5.45881	5.45587	6.63492	7.66783	NotSig	0.683039	0.106497	0.155449	NotSig	0.400733	0.405303	0.467117	Enrich	2.04466	0.0120475	0.0215394	Enrich	0.903422	0.0103894	0.0409603	1.20175	0.00275116	0.0151366	7.55184	1.18322	5.8784e-23	0.990404	1.74986e-15
D3Z7Q2	Smim20	Small integral membrane protein 20	SIM20_MOUSE	0	0	0	1.02257	0	0	1.66172	2.79814	NotSig				NotSig				NotSig	inf	0.391002	0.422677	NotSig	2.56315	0.639345	0.706168	inf	0.391002	0.469332	4.69924	-1.42439	0.0124803	-1.04304	0.00667498
E9PUL5	Prrt2	Proline-rich transmembrane protein 2	PRRT2_MOUSE	3.33492	3.68866	2.7686	4.92202	4.72536	4.29058	6.5119	6.78777	NotSig	1.36781	0.0305448	0.0565645	NotSig	0.725915	0.133649	0.245177	Enrich	3.36519	0.0249228	0.0394176	Enrich	1.8672	0.00128898	0.0151013	1.82433	0.000437176	0.00577711	7.22498	0.702923	6.44114e-12	0.261254	0.0860543
E9Q0C6	Kiaa1210	Acrosomal protein KIAA1210	K1210_MOUSE	0	0	0	0	5.96783	5.1452	7.08558	6.42193	Enrich	inf	0.000251438	0.00104607	Enrich	inf	0.000803179	0.00612165	Enrich	inf	2.26633e-05	0.000569659	NotSig	inf	0.0189644	0.053793	1.07007	0.0221366	0.0589359
E9Q3L2	Pi4ka	Phosphatidylinositol 4-kinase alpha	PI4KA_MOUSE	3.56803	2.82586	1.77687	4.16885	7.25422	5.73177	7.9059	7.43373	Enrich	3.75358	0.000149315	0.000706397	NotSig	2.61588	0.0468893	0.132124	Enrich	5.52248	0.00777272	0.0150402	Enrich	3.29155	0.000968679	0.0136148	0.657198	0.0804836	0.143335	7.17169	0.937469	5.46669e-11	0.192308	0.0286992
E9Q4Z2	Acacb	Acetyl-CoA carboxylase 2	ACACB_MOUSE	6.8358	6.64459	5.15085	6.14096	6.38734	6.0631	3.89116	6.1009	NotSig	-0.638465	0.489143	0.542834	NotSig	-0.411653	0.484109	0.539024	NotSig	-1.41322	0.115636	0.146602	NotSig	-0.0903215	0.90857	0.929738	-2.47266	0.00332572	0.016963	2.77043	-1.70198	0.234427	6.90931	0.00541182
E9Q557	Dsp	Desmoplakin	DESP_MOUSE	10.1425	9.19368	11.4777	9.60739	10.3491	9.49273	8.69022	9.84498	NotSig	-0.0870969	0.764881	0.800519	NotSig	-0.00791714	0.688537	0.73231	Deplete	-2.69933	0.016817	0.0285998	NotSig	-0.0917558	0.724528	0.774685	-1.36408	0.071427	0.133018	0	#NAME?	0.248057	#NAME?	0.390612
E9Q7X7	Nrxn2	Neurexin-2	NRX2A_MOUSE	0	0	0	0	2.34937	1.83542	6.07675	5.07171	NotSig	inf	0.181881	0.245991	NotSig	inf	0.18214	0.288495	Enrich	inf	4.91729e-05	0.000569659	NotSig	inf	0.0199551	0.0543047	2.43698	0.0698114	0.131317	9.58671	1.24434	6.64757e-86	1.64873	1.08431e-120
E9Q8I9;E9Q8I9-2	Fry	Protein furry homolog;Isoform 2 of Protein furry homolog	FRY_MOUSE	0	0	0	0	6.0354	4.36072	5.2615	4.8355	Enrich	inf	0.00033787	0.00131488	Enrich	inf	0.00149096	0.00916536	Enrich	inf	0.00022368	0.0007962	NotSig	inf	0.0271755	0.0631325	-0.835899	0.10937	0.180141	7.44621	0.065151	1.53299e-09	0.862907	3.37262e-11
F6SEU4	Syngap1	Ras/Rap GTPase-activating protein SynGAP	SYGP1_MOUSE	1.00934	2.73319	2.12015	5.39887	7.98625	5.16658	5.53671	6.09301	Enrich	6.0679	0.00524276	0.0128614	NotSig	2.46673	0.0801047	0.166208	NotSig	2.40202	0.0653229	0.0892122	NotSig	0.679722	0.0967658	0.151875	-2.43051	0.000772981	0.0075281	5.52465	1.09581	2.47903e-06	0.919173	0.00265451
F8VPU2	Farp1	FERM, ARHGEF and pleckstrin domain-containing protein 1	FARP1_MOUSE	0	2.06816	0	5.25103	6.37437	4.42058	2.7711	5.14053	Enrich	inf	4.60338e-06	0.000146061	NotSig	-1.15784	0.350668	0.454376	Enrich	inf	0.00118064	0.00294543	NotSig	-0.158553	0.638337	0.705645	-3.76022	0.00017293	0.00376488	3.72954	-2.19403	0.387643	1.94823	1.84542e-05
G3X9C2	Nccrp1	F-box only protein 50	FBX50_MOUSE	5.56412	4.66852	6.73595	5.43399	5.77975	5.28378	5.6635	5.56202	NotSig	0.0167056	0.716797	0.758151	NotSig	0.839927	0.534005	0.586425	NotSig	-1.58998	0.243239	0.282761	NotSig	-0.238895	0.848161	0.879447	-0.0808038	0.79438	0.839027	3.08946	-0.06605	0.0120762	10.8847	5.57445e-06
G3X9K3	Arfgef1	Brefeldin A-inhibited guanine nucleotide-exchange protein 1	BIG1_MOUSE	2.35062	0	0.815803	2.67264	5.72489	4.70894	6.62141	6.06538	Enrich	3.18722	0.0199159	0.0393171	Enrich	inf	0.000733824	0.0058972	Enrich	5.55668	0.0039483	0.00846507	NotSig	2.85544	0.0364315	0.0734515	0.91371	0.0277193	0.0687402	7.27906	0.411674	1.09829e-10	0.850912	7.68126e-16
G3XA57;G3XA57-2	Rab11fip2	Rab11 family-interacting protein 2;Isoform 2 of Rab11 family-interacting protein 2	RFIP2_MOUSE	0	0	0	2.40046	4.37623	3.07113	5.44954	5.07373	Enrich	inf	1.2872e-05	0.000194338	NotSig	inf	0.0672083	0.14836	Enrich	inf	0.000136414	0.000623905	NotSig	1.29358	0.148757	0.221247	1.14909	0.0108644	0.0365413	7.45325	0.504657	2.4547e-16	0.370386	0.00380986
G5E829	Atp2b1	Plasma membrane calcium-transporting ATPase 1	AT2B1_MOUSE	5.44437	5.74486	6.25915	7.60367	7.70324	6.78518	9.52553	9.18206	Enrich	2.13679	0.00683458	0.0160505	Enrich	1.0305	0.0129563	0.0487694	Enrich	3.06055	0.00728557	0.0142775	Enrich	1.55431	0.0017028	0.0158636	1.83928	0.000162074	0.00363598	8.27927	-0.754696	0.925671	-4.02144	2.72917e-231
G5E897	Poglut3	Protein O-glucosyltransferase 3	PLGT3_MOUSE	0	0	0	4.83643	0	0	0	4.5871	NotSig				NotSig				NotSig				NotSig	-0.287793	0.499446	0.580066
G5E8K5;G5E8K5-2;G5E8K5-3	Ank3	Ankyrin-3;Isoform 2 of Ankyrin-3;Isoform 3 of Ankyrin-3	ANK3_MOUSE	2.47215	4.63951	3.11473	4.89708	6.32006	6.62973	8.61622	8.1819	NotSig	2.44756	0.072128	0.110012	Enrich	2.02961	0.00488889	0.0227074	Enrich	4.91394	0.0127288	0.0225983	Enrich	3.2111	0.00120038	0.0149157	2.27021	0.000901103	0.00797915	8.83289	-0.291927	0.00573039	-0.785331	3.74132e-13
O08529	Capn2	Calpain-2 catalytic subunit	CAN2_MOUSE	1.01179	4.04324	2.06985	4.11402	6.6324	5.44718	7.43842	7.27104	Enrich	4.69558	0.0101889	0.0224155	NotSig	1.49689	0.0269807	0.0875227	Enrich	4.39337	0.0192266	0.0317748	Enrich	3.18149	0.000540752	0.0126671	0.817376	0.0250308	0.0636048	5.39514	-0.628262	0.761572	-0.369539	0.00921059
O08530	S1pr1	Sphingosine 1-phosphate receptor 1	S1PR1_MOUSE	0.854846	1.56237	1.75533	4.98223	4.78489	3.22732	5.88235	6.29033	Enrich	3.60149	0.0128876	0.0271786	NotSig	1.86936	0.290117	0.404249	Enrich	3.44077	0.0254595	0.0401778	Enrich	1.32543	0.000400622	0.0114913	1.03194	0.0525374	0.107985	3.11883	-5.77837	1.25447e-33	-4.74346	2.87263e-19
O08532-4;O08532-5	Cacna2d1	Isoform 2D of Voltage-dependent calcium channel subunit alpha-2/delta-1;Isoform 2E of Voltage-dependent calcium channel subunit alpha-2/delta-1	CA2D1_MOUSE	0	0	0	0.73171	4.98826	3.82539	3.57602	3.77257	Enrich	inf	0.00247874	0.00681653	Enrich	inf	0.00234775	0.012719	Enrich	inf	0.000169112	0.000679173	NotSig	2.97395	0.0204711	0.0548563	-1.75224	0.069934	0.131317	7.33083	1.72218	1.33648e-24	-0.200134	0.00377009
O08539	Bin1	Myc box-dependent-interacting protein 1	BIN1_MOUSE	4.88931	5.44785	2.29753	5.72609	7.23183	6.9298	9.1292	9.06904	Enrich	2.209	0.00646704	0.0153977	Enrich	1.48781	0.0103196	0.0403678	Enrich	5.34963	0.0145274	0.0253512	Enrich	3.18957	0.00320579	0.0210822	1.90386	0.000849337	0.00778556
O08547	Sec22b	Vesicle-trafficking protein SEC22b	SC22B_MOUSE	2.91693	0.916803	1.60225	3.66482	6.98396	5.20549	5.82859	5.2134	Enrich	3.68012	0.0207537	0.0407372	NotSig	3.66687	0.0155963	0.0569083	Enrich	3.63084	0.0213673	0.0347325	Enrich	1.60082	0.00148995	0.0153416	-1.27783	0.0311034	0.0741659	5.1962	-0.199857	0.783988	-1.04171	1.30467e-06
O08553	Dpysl2	Dihydropyrimidinase-related protein 2	DPYL2_MOUSE	7.59368	7.71049	7.17913	7.82113	12.1092	11.6088	13.1553	12.3656	Enrich	4.35194	0.000912287	0.00296197	Enrich	3.90366	7.69681e-05	0.00287315	Enrich	5.88301	9.08985e-05	0.00058736	Enrich	4.52955	0.00332932	0.0215639	1.06019	0.0055714	0.0235038	8.91043	-0.073855	0.00108491	1.12109	1.03145e-47
O08576;O08576-2;O08576-3;O08576-4	Rundc3a	RUN domain-containing protein 3A;Isoform 2 of RUN domain-containing protein 3A;Isoform 3 of RUN domain-containing protein 3A;Isoform 4 of RUN domain-containing protein 3A	RUN3A_MOUSE	0	0	0	0	5.6444	3.60987	5.3177	4.64128	Enrich	inf	2.68647e-06	0.000131925	NotSig	inf	0.0644433	0.146386	Enrich	inf	0.000117241	0.000599543	NotSig	inf	0.031672	0.0685901	-0.297395	0.202425	0.290152	8.05442	1.42647	8.57372e-27	1.35042	9.49921e-37
O08579	Emd	Emerin	EMD_MOUSE	0	0	0	0	7.46964	5.45059	6.46633	5.24299	Enrich	inf	8.17614e-05	0.000478459	Enrich	inf	0.000913663	0.00669516	Enrich	inf	0.000210711	0.000767169	NotSig	inf	0.0380459	0.0754211	-0.994384	0.0422921	0.0924422	5.37957	-1.16414	0.0905009	-0.257834	0.77055
O08582	Gtpbp1	GTP-binding protein 1	GTPB1_MOUSE	0	0	0	0	4.13954	0.787009	3.92875	1.85524	Enrich	inf	5.4182e-05	0.000381588	NotSig	inf	0.391002	0.454376	Enrich	inf	0.000310611	0.00100241	NotSig	inf	0.5	0.580066	-0.196519	0.417261	0.492878	4.35262	0.257639	0.349482	0.269781	0.621534
O08585	Clta	Clathrin light chain A	CLCA_MOUSE	2.08717	3.53037	3.83024	4.49847	9.63399	9.20627	12.2463	10.7789	Enrich	6.56972	0.00702023	0.0163746	NotSig	4.47964	0.0221311	0.0754924	Enrich	7.67316	0.00548176	0.0111937	Enrich	6.33639	0.00379503	0.0230415	2.64885	0.000777783	0.0075281	7.4349	-0.747764	0.672251	-0.819191	3.63976e-08
O08586	Pten	Phosphatidylinositol 3,4,5-trisphosphate 3-phosphatase and dual-specificity protein phosphatase PTEN	PTEN_MOUSE	0	0	0	0	4.96218	3.78883	5.10587	4.67536	Enrich	inf	1.69502e-05	0.000207169	Enrich	inf	0.0025805	0.0135655	Enrich	inf	0.000426676	0.00126591	NotSig	inf	0.0345728	0.0716169	0.219739	0.6715	0.730572	6.62787	-0.059903	0.00939027	-0.467512	0.00126013
O08599	Stxbp1	Syntaxin-binding protein 1	STXB1_MOUSE	6.93287	6.9698	6.27089	7.67945	9.07724	8.57923	10.7997	10.4323	Enrich	1.99653	0.0102913	0.022588	Enrich	1.64284	0.0128965	0.0486593	Enrich	4.40701	0.000669946	0.00181328	Enrich	2.71765	0.000823862	0.0133755	1.74078	0.000460736	0.00591168	9.39409	2.19391	1.4811e-97	1.37581	3.07259e-73
O08599-2	Stxbp1	Isoform 2 of Syntaxin-binding protein 1	STXB1_MOUSE	2.69756	3.11006	0	3.86616	6.46361	5.59487	6.92059	6.53494	NotSig	2.19673	0.0916669	0.135675	NotSig	1.98557	0.0983366	0.192482	Enrich	inf	3.63377e-05	0.000569659	Enrich	2.7004	0.000564268	0.0129938	0.360113	0.327518	0.419036	9.39409	2.19391	1.4811e-97	1.37581	3.07259e-73
O08601;O08601-2	Mttp	Microsomal triglyceride transfer protein large subunit;Isoform 2 of Microsomal triglyceride transfer protein large subunit	MTP_MOUSE	0	0	0	4.52011	0	1.09531	0.630542	4.64424	NotSig				NotSig	inf	0.391002	0.454376	NotSig	inf	0.391002	0.422677	NotSig	0.0998617	0.723708	0.774685	inf	0.391002	0.469332	3.53168	0.808813	0.0511952	-0.364581	0.423432
O08709	Prdx6	Peroxiredoxin-6	PRDX6_MOUSE	5.68364	6.71295	6.18691	6.57804	7.78541	7.9516	8.65466	8.34584	Enrich	2.10933	0.000914527	0.00296574	NotSig	0.682951	0.195975	0.293474	Enrich	2.44454	0.000404917	0.001219	Enrich	1.72779	0.00392353	0.0234229	0.858713	0.0250331	0.0636048	6.00451	-2.25568	2.49118e-08	-2.8435	2.85578e-07
O08715;O08715-2;O08715-3;O08715-4;O08715-5;O08715-6	Akap1	A-kinase anchor protein 1, mitochondrial;Isoform 1 of A-kinase anchor protein 1, mitochondrial;Isoform 2 of A-kinase anchor protein 1, mitochondrial;Isoform 4 of A-kinase anchor protein 1, mitochondrial;Isoform 5 of A-kinase anchor protein 1, mitochondrial;Isoform 6 of A-kinase anchor protein 1, mitochondrial	AKAP1_MOUSE	0	0	0	0	0	0	1.78163	2.1832	NotSig				NotSig				Enrich	inf	0.0115275	0.0207872	NotSig	inf	0.0197453	0.0543047	inf	0.0115275	0.0377382	6.03235	0.777157	0.000263162	0.616718	0.159599
O08749	Dld	Dihydrolipoyl dehydrogenase, mitochondrial	DLDH_MOUSE	6.23847	6.53911	5.85349	7.72825	6.99308	6.98466	7.56977	8.49655	NotSig	0.626215	0.158149	0.220319	NotSig	0.441865	0.249703	0.354272	Enrich	1.64067	0.0103515	0.0190498	NotSig	0.720171	0.040943	0.0789375	0.598869	0.0527963	0.108364	5.59571	0.003141	0.212611	-1.02639	5.10499e-08
O08756	Hsd17b10	3-hydroxyacyl-CoA dehydrogenase type-2	HCD2_MOUSE	6.60706	6.21244	3.92332	5.9378	4.42909	5.52611	6.27225	6.06177	NotSig	-0.501417	0.280965	0.354103	NotSig	-0.735889	0.0413226	0.120179	NotSig	1.28431	0.247287	0.286769	NotSig	0.363857	0.927606	0.944746	0.78131	0.366274	0.459072	3.08521	-3.63928	5.36656e-17	-2.60432	5.91791e-13
O08759;O08759-2	Ube3a	Ubiquitin-protein ligase E3A;Isoform 2 of Ubiquitin-protein ligase E3A	UBE3A_MOUSE	0	0.69632	0	0.496572	6.79287	5.09582	7.17563	6.57932	Enrich	inf	1.47116e-05	0.000201704	Enrich	4.67703	0.00304055	0.0154644	Enrich	inf	3.90021e-05	0.000569659	Enrich	7.02371	0.000432011	0.0117504	0.402869	0.148738	0.229083	8.97996	0.54688	6.92617e-29	0.971509	2.97883e-43
O08788;O08788-2	Dctn1	Dynactin subunit 1;Isoform 2 of Dynactin subunit 1	DCTN1_MOUSE	0	0	0	0	4.9969	2.92811	4.89897	4.9404	Enrich	inf	5.50417e-05	0.000382234	NotSig	inf	0.0666037	0.147698	Enrich	inf	0.000245773	0.000843449	NotSig	inf	0.0270066	0.0628962	-0.0654038	0.738947	0.789411	6.04061	0.187259	0.164266	0.471055	7.07488e-05
O08795;O08795-2	Prkcsh	Glucosidase 2 subunit beta;Isoform 2 of Glucosidase 2 subunit beta	GLU2B_MOUSE	3.28657	4.005	2.81493	8.80547	3.28168	4.56477	3.28459	8.53201	NotSig	-0.138602	0.997676	0.997676	NotSig	0.587704	0.262574	0.369574	NotSig	-0.100107	0.655746	0.68288	NotSig	-0.32351	0.312703	0.418775	-0.796736	0.998088	0.998433	6.26205	-0.798264	0.162292	-0.064559	0.452406
O08807	Prdx4	Peroxiredoxin-4	PRDX4_MOUSE	3.06153	1.98034	2.31583	7.10384	2.96236	4.539	1.24921	6.72401	NotSig	0.0692632	0.950163	0.961703	NotSig	1.62005	0.110863	0.212003	NotSig	-2.8528	0.512239	0.541693	NotSig	-0.444622	0.21958	0.308775	-2.79748	0.229342	0.31772	2.7738	-4.02166	1.29261e-08	-3.35804	1.48723e-07
O08808	Diaph1	Protein diaphanous homolog 1	DIAP1_MOUSE	0	0	0	0	0	0	2.56652	1.48785	NotSig				NotSig				Enrich	inf	0.00611519	0.0122501	NotSig	inf	0.5	0.580066	inf	0.00611519	0.0247556
O08810	Eftud2	116 kDa U5 small nuclear ribonucleoprotein component	U5S1_MOUSE	0	0	0	0	4.74797	1.33055	0	0	Enrich	inf	1.45452e-05	0.000201704	NotSig	inf	0.181721	0.288495	NotSig								#NAME?	1.45452e-05	0.00215051	5.25352	0.134699	0.0638065	-0.41001	0.0224206
O08848	RO60	60 kDa SS-A/Ro ribonucleoprotein	RO60_MOUSE	1.60407	0	1.50597	2.47439	5.1137	2.01896	2.77408	3.12009	NotSig	2.95053	0.0323742	0.0595113	NotSig	inf	0.196054	0.293474	NotSig	-0.820468	0.505731	0.535799	NotSig	-0.0382799	0.553732	0.628144	-1.9262	0.0840642	0.147982
O08917	Flot1	Flotillin-1	FLOT1_MOUSE	9.62983	8.81561	8.19486	5.29405	7.69041	8.04539	6.58985	5.71911	NotSig	-1.93332	0.0548894	0.0943412	NotSig	-0.5487	0.501988	0.555214	NotSig	-1.91079	0.0743242	0.099635	NotSig	-1.17558	0.829369	0.865388	-1.39374	0.162044	0.246242	6.28748	1.62175	2.41861e-12	0.767972	9.83724e-13
O08919	Numbl	Numb-like protein	NUMBL_MOUSE	0.958177	1.02426	1.9557	4.30136	6.77545	6.63906	8.86271	7.96495	Enrich	5.05761	0.00805064	0.0185266	Enrich	4.68025	0.0096295	0.0381168	Enrich	6.05819	0.00776802	0.0150402	Enrich	3.69185	0.000766311	0.0132077	2.11414	0.000270576	0.00469029	6.1409	3.03888	1.888e-16	1.4272	1.35995e-09
O08967;P63034;P63034-2;P63034-3;Q9QX11;Q9QX11-2	Cyth3;Cyth2;Cyth2;Cyth2;Cyth1;Cyth1	Cytohesin-3;Cytohesin-2;Isoform 2 of Cytohesin-2;Isoform 3 of Cytohesin-2;Cytohesin-1;Isoform 2 of Cytohesin-1	CYH3_MOUSE;CYH2_MOUSE;CYH2_MOUSE;CYH2_MOUSE;CYH1_MOUSE;CYH1_MOUSE	0.823287	0	0	0.795273	6.02331	4.60077	6.41519	5.97767	Enrich	4.86801	0.00777486	0.017952	Enrich	inf	4.53375e-05	0.00270019	Enrich	inf	1.91865e-05	0.000569659	Enrich	4.94786	0.00654017	0.0308464	0.409492	0.0512939	0.106184
O08997	Atox1	Copper transport protein ATOX1	ATOX1_MOUSE	1.20483	2.82139	4.55193	1.99821	5.3023	7.18285	6.50226	5.88163	NotSig	2.5117	0.0417956	0.0743453	NotSig	1.47578	0.0974932	0.19153	NotSig	0.933002	0.295171	0.337658	NotSig	2.9034	0.0441344	0.0829845	1.33769	0.0434646	0.0944343	6.09433	-2.77662	9.50531e-22	-1.68792	2.48447e-09
O09012;O09012-2	Pex5	Peroxisomal targeting signal 1 receptor;Isoform 2 of Peroxisomal targeting signal 1 receptor	PEX5_MOUSE	0	0	0	1.25458	5.66425	4.73575	5.37611	4.81037	Enrich	inf	2.84086e-05	0.000271037	Enrich	inf	0.000262018	0.00351264	Enrich	inf	0.0002173	0.000782226	NotSig	1.86879	0.0619452	0.10566	-0.254565	0.358065	0.451914	5.13433	0.732899	0.0224304	1.38726	1.91496e-06
O09061	Psmb1	Proteasome subunit beta type-1	PSB1_MOUSE	6.40323	5.83767	6.17275	5.88101	6.32672	5.84568	5.4344	5.53176	NotSig	-0.0633972	0.633101	0.680621	NotSig	0.00610827	0.987187	0.990165	Deplete	-0.792309	0.0313884	0.04826	NotSig	-0.446798	0.366234	0.479276	-0.923273	0.00360087	0.0178224	6.85185	-1.52329	2.8615e-11	-1.82102	6.38353e-45
O09111	Ndufb11	NADH dehydrogenase [ubiquinone] 1 beta subcomplex subunit 11, mitochondrial	NDUBB_MOUSE	0	0.89207	0	3.14108	4.92005	3.31282	6.13342	6.30439	Enrich	inf	0.000189679	0.000835924	NotSig	2.5036	0.141931	0.257072	Enrich	inf	4.89401e-08	7.02046e-05	NotSig	2.53805	0.0591892	0.101576	1.1872	0.0111232	0.0369157	5.33612	-2.70281	1.50178e-26	-2.44435	1.87351e-39
O09114;O09114-2	Ptgds	Prostaglandin-H2 D-isomerase;Isoform 2 of Prostaglandin-H2 D-isomerase	PTGDS_MOUSE	2.9617	3.0103	0	3.46142	4.13974	3.93306	2.80471	4.50087	NotSig	0.980269	0.396976	0.449453	NotSig	2.15586	0.553167	0.603785	Enrich	inf	0.00498302	0.0102925	NotSig	0.217743	0.442721	0.551549	-1.76969	0.194026	0.281318	7.15744	-5.71437	3.91558e-78	-1.58813	7.91221e-42
O09117-2	Sypl1	Isoform 2 of Synaptophysin-like protein 1	SYPL1_MOUSE	0	0	0	0	1.61877	0.834175	4.85655	3.45695	NotSig	inf	0.189185	0.249405	NotSig	inf	0.391002	0.454376	Enrich	inf	2.48026e-05	0.000569659	NotSig	inf	0.0325098	0.0695897	2.64813	0.0420026	0.0920179
O09126	Sema4d	Semaphorin-4D	SEM4D_MOUSE	0	0	0	0	0	0	4.49139	4.93631	NotSig				NotSig				Enrich	inf	0.000230359	0.000811916	NotSig	inf	0.0483162	0.0878505	inf	0.000230359	0.00438591	3.75926	-1.47202	0.00421026	-0.09331	0.013489
O09131	Gsto1	Glutathione S-transferase omega-1	GSTO1_MOUSE	0	3.06357	0.768003	0	5.11441	5.2544	6.75401	5.71002	Enrich	inf	9.04833e-05	0.000513882	NotSig	-0.200001	0.318581	0.435437	Enrich	5.91048	0.00257402	0.00581945	NotSig	inf	0.0253358	0.0607671	1.69457	0.00239404	0.0138845	4.13607	-0.979322	0.127312	-1.54049	0.000596045
O09159	Man2b1	Lysosomal alpha-mannosidase	MA2B1_MOUSE	0	0	1.16432	5.53965	2.43528	1.93785	3.2613	5.32195	NotSig	inf	0.181695	0.245991	NotSig	inf	0.211227	0.309057	NotSig	1.46955	0.246783	0.286532	NotSig	-0.323634	0.535237	0.612851	0.247972	0.66556	0.724926	4.13793	-0.898685	1	-1.20671	0.990952
O09167	Rpl21	60S ribosomal protein L21	RL21_MOUSE	6.37943	6.92346	6.05125	6.07404	6.61697	6.39293	4.80216	5.25672	NotSig	0.117541	0.615573	0.664897	NotSig	-0.487942	0.299425	0.414828	Deplete	-1.29651	0.00430417	0.00909997	NotSig	-0.779378	0.313829	0.420048	-1.85815	0.000394544	0.00558788	3.3922	-1.26264	0.0222086	1.0242	0.162042
O35074	Ptgis	Prostacyclin synthase	PTGIS_MOUSE	4.61669	1.04023	0	0.394166	3.16944	3.78017	0.388256	0	NotSig	-0.774319	0.271183	0.343349	NotSig	2.82571	0.16401	0.285141	NotSig	inf	0.391002	0.422677	NotSig	#NAME?	0.391002	0.49801	-4.83782	0.0756773	0.138526	0.767726	-4.21859	0.026941	-2.30588	0.351697
O35083	Agpat1	1-acyl-sn-glycerol-3-phosphate acyltransferase alpha	PLCA_MOUSE	1.55163	1.39615	1.31617	4.97902	4.22558	4.4853	8.19778	7.63284	NotSig	1.03872	0.250775	0.319274	NotSig	2.01556	0.182925	0.288495	Enrich	5.15058	0.0102334	0.0188808	Enrich	2.67511	0.000241614	0.0113696	3.15167	0.063257	0.12236	7.54778	1.32299	2.67651e-20	1.42209	4.5483e-24
O35089	Cnih2	Protein cornichon homolog 2	CNIH2_MOUSE	0.993965	1.09463	1.41923	4.15352	2.31456	1.61167	4.93855	5.56075	NotSig	0.631802	0.338599	0.417181	NotSig	-0.246059	0.731602	0.771634	NotSig	2.62124	0.0970858	0.125695	NotSig	0.488382	0.487866	0.580066	3.75677	0.0949672	0.161887
O35098;O35098-2	Dpysl4	Dihydropyrimidinase-related protein 4;Isoform 2 of Dihydropyrimidinase-related protein 4	DPYL4_MOUSE	0	5.98116	1.824	7.44089	6.33088	5.95285	7.13204	7.06296	Enrich	inf	1.1287e-05	0.000183664	NotSig	-0.817859	0.977142	0.9812	NotSig	1.88699	0.0607756	0.0843974	NotSig	-0.423486	0.341009	0.450036	0.848811	0.0337178	0.0781885	5.92415	2.25042	4.985e-10	2.14701	1.10875e-16
O35114	Scarb2	Lysosome membrane protein 2	SCRB2_MOUSE	0	0	1.46997	3.92982	0	0	2.182	4.73166	NotSig				NotSig				NotSig	-1.37175	0.690587	0.715011	NotSig	0.76458	0.0546966	0.0954982	inf	0.0752634	0.138118	6.39266	-1.13549	0.000249908	0.364395	2.60424e-13
O35127	Grcc10	Protein C10	C10_MOUSE	0	0	0	0	1.09071	1.91294	4.08026	3.84721	NotSig	inf	0.391002	0.443422	NotSig	inf	0.192422	0.290656	Enrich	inf	0.000104501	0.000590983	NotSig	inf	0.0698023	0.116595	1.72453	0.0699694	0.131317	2.80445	-2.5853	8.18903e-06	-2.02302	5.90268e-07
O35129	Phb2	Prohibitin-2	PHB2_MOUSE	8.68245	7.82577	9.37183	7.12136	8.26478	7.45755	6.30576	7.74175	NotSig	-0.603667	0.538078	0.590233	NotSig	-0.540844	0.62809	0.676405	Deplete	-2.99138	0.00391801	0.00842636	NotSig	0.430793	0.256184	0.352834	-1.8301	0.0218328	0.0585039	6.1404	-0.440575	0.564975	-0.170287	0.995287
O35136	Ncam2	Neural cell adhesion molecule 2	NCAM2_MOUSE	4.34602	2.93076	0	4.4611	6.42905	5.12176	5.36677	5.29632	NotSig	1.01024	0.260279	0.330608	NotSig	0.341439	0.292663	0.407156	Enrich	inf	0.000178971	0.000697648	NotSig	0.748566	0.0904961	0.143697	-1.16743	0.0499798	0.104359	6.55078	-0.704643	0.617201	0.408518	0.317224
O35143	ATP5IF1	ATPase inhibitor, mitochondrial	ATIF1_MOUSE	3.07893	5.15526	3.64892	4.93017	2.27193	4.77882	4.37743	4.96118	NotSig	-0.226093	0.650473	0.697031	NotSig	0.565568	0.836602	0.865562	NotSig	-0.0471321	0.599545	0.626856	NotSig	-0.024698	0.903286	0.926355	0.902725	0.207066	0.294616
O35215	Ddt	D-dopachrome decarboxylase	DOPD_MOUSE	1.41544	2.94247	1.38483	2.40603	3.76336	5.54091	5.59661	5.09571	NotSig	1.4833	0.284646	0.358086	NotSig	0.667359	0.224308	0.324272	NotSig	2.49061	0.0482103	0.0692616	NotSig	1.29184	0.148713	0.221247	0.882298	0.296372	0.388145	4.68307	-1.33139	0.001681	-0.848735	0.201871
O35226;O35226-2	Psmd4	26S proteasome non-ATPase regulatory subunit 4;Isoform Rpn10B of 26S proteasome non-ATPase regulatory subunit 4	PSMD4_MOUSE	0.930638	0	0	0	6.75054	4.77186	6.87015	5.89528	Enrich	5.17401	0.00667528	0.0157842	Enrich	inf	0.000165661	0.00311541	Enrich	inf	0.000105033	0.000590983	NotSig	inf	0.0161919	0.0503174	0.134325	0.725671	0.777812	7.06806	-0.81706	0.0333969	-0.638574	0.00867113
O35239	Ptpn9	Tyrosine-protein phosphatase non-receptor type 9	PTN9_MOUSE	0	0	0	1.69599	3.5514	2.75102	6.71353	6.27577	Enrich	inf	1.55495e-05	0.000201704	NotSig	inf	0.0598636	0.145715	Enrich	inf	5.16926e-05	0.000569659	Enrich	4.76408	0.00214807	0.0176902	3.3087	0.000156714	0.00363598	5.37082	0.258255	0.00246904	1.2728	6.10735e-07
O35250;O35250-2	Exoc7	Exocyst complex component 7;Isoform 2 of Exocyst complex component 7	EXOC7_MOUSE	0	0	0	0	5.57167	1.87092	4.21302	4.35742	Enrich	inf	5.67008e-07	9.5355e-05	NotSig	inf	0.184321	0.288495	Enrich	inf	7.71689e-05	0.000569659	NotSig	inf	0.0410434	0.0790292	-1.38897	0.00144372	0.0103934	4.95584	-0.378751	0.248057	-0.93964	8.23853e-05
O35295	Purb	Transcriptional activator protein Pur-beta	PURB_MOUSE	3.36605	3.11677	5.28851	3.8644	6.76636	3.78018	4.92018	4.7465	NotSig	2.77682	0.0544693	0.093795	NotSig	0.827694	0.703944	0.747501	NotSig	-0.752866	0.57443	0.602574	NotSig	0.55099	0.225543	0.315819	-1.91744	0.00111477	0.00891199	9.18797	0.561643	4.04982e-26	-0.049388	0.0674687
O35316	Slc6a6	Sodium- and chloride-dependent taurine transporter	SC6A6_MOUSE	0	0	0	0	0.824588	0	4.58262	4.49561	NotSig	inf	0.391002	0.443422	NotSig				Enrich	inf	0.00109685	0.00276336	NotSig	inf	0.0314142	0.0684275	3.52142	0.0131225	0.0409958	7.13944	-1.52561	0.00303445	-0.444863	0.183242
O35343	Kpna4	Importin subunit alpha-3	IMA3_MOUSE	0	0	0	0	4.06555	0.761071	4.2401	3.86658	Enrich	inf	8.45843e-06	0.000166148	NotSig	inf	0.391002	0.454376	Enrich	inf	0.000339431	0.00106546	NotSig	inf	0.0348221	0.0717106	0.239899	0.507715	0.579616	5.97384	0.450745	0.00321567	0.194771	0.0662032
O35344	Kpna3	Importin subunit alpha-4	IMA4_MOUSE	0.340411	0	0.610848	2.69666	6.8522	5.27818	7.39043	6.43552	Enrich	8.20055	0.000120872	0.000606564	Enrich	inf	0.000679278	0.00561143	Enrich	7.27777	0.000655274	0.00178028	Enrich	3.71728	0.00187195	0.016652	0.576955	0.0851433	0.149608	6.37589	0.549176	0.000139945	0.31459	0.215061
O35345	Kpna6	Importin subunit alpha-7	IMA7_MOUSE	0	0	0	0	5.39471	3.78742	5.41004	4.05329	Enrich	inf	2.1662e-05	0.000232916	Enrich	inf	0.00910253	0.0365402	Enrich	inf	0.000173862	0.000688531	NotSig	inf	0.0457533	0.0846691	0.0546319	0.955493	0.962477	5.69827	0.336381	0.00369671	0.515313	5.26982e-06
O35350	Capn1	Calpain-1 catalytic subunit	CAN1_MOUSE	3.6028	1.08645	5.62689	2.66076	4.78636	2.42933	3.50094	3.75249	NotSig	0.294772	0.409978	0.462445	NotSig	1.58157	0.480994	0.536905	NotSig	-2.67952	0.0450319	0.0655154	NotSig	-0.789415	0.550897	0.626192	-1.37019	0.000108546	0.00310375
O35381	Anp32a	Acidic leucine-rich nuclear phosphoprotein 32 family member A	AN32A_MOUSE	0.83797	2.28263	2.25202	0.766427	6.89989	6.45729	4.50374	1.57906	Enrich	5.79315	0.00293221	0.0078746	NotSig	1.89296	0.0727446	0.156049	NotSig	0.680164	0.204962	0.241494	NotSig	1.1045	0.701682	0.756589	-2.4031	0.00434863	0.020233	7.51462	-1.15661	4.49528e-06	-1.91977	9.74802e-77
O35382	Exoc4	Exocyst complex component 4	EXOC4_MOUSE	0	0.663995	0.673924	1.02424	5.82735	3.89618	4.98616	4.79731	Enrich	inf	7.47568e-05	0.000456835	Enrich	3.57565	0.00898246	0.0361473	Enrich	4.52289	0.005643	0.0114766	Enrich	4.12245	0.00484622	0.0267112	-0.864326	0.0188329	0.0528637	6.78772	0.662706	8.14757e-10	0.54067	1.27443e-05
O35405	Pld3	5'-3' exonuclease PLD3	PLD3_MOUSE	0	0	0	6.11141	5.11445	2.22696	4.72994	6.11574	Enrich	inf	0.000135038	0.000656467	NotSig	inf	0.191414	0.289956	Enrich	inf	9.02186e-05	0.00058736	NotSig	-0.048139	0.9907	0.992111	-0.417244	0.191292	0.27819	8.46454	1.65201	5.10982e-45	0.402606	1.63286e-07
O35449	Prrt1	Proline-rich transmembrane protein 1	PRRT1_MOUSE	0	0	2.00192	5.16662	7.44983	2.9178	6.19585	6.1443	Enrich	inf	4.4492e-06	0.000146061	NotSig	inf	0.181698	0.288495	NotSig	3.06435	0.0390148	0.0579366	Enrich	0.970669	0.00752009	0.0337635	-1.26557	8.10026e-05	0.00273749	5.63443	-0.268661	0.390555	-0.482875	0.000876529
O35453;O35453-2;P00755;P15949;Q9QYN3;Q9QYN3-2	Hpn;Hpn;Klk1b1;Klk1b9;Klk11;Klk11	Serine protease hepsin;Isoform 2 of Serine protease hepsin;Kallikrein 1-related peptidase b1;Kallikrein 1-related peptidase b9;Kallikrein-11;Isoform 1 of Kallikrein-11	HEPS_MOUSE;HEPS_MOUSE;K1KB1_MOUSE;K1KB9_MOUSE;KLK11_MOUSE;KLK11_MOUSE	3.25061	7.83564	6.92073	5.81778	7.53293	7.82425	4.36022	6.49629	NotSig	1.6864	0.112726	0.163673	NotSig	-0.130722	0.9762	0.980717	NotSig	-1.68803	0.183355	0.220195	NotSig	0.624277	0.300756	0.405091	-2.11811	0.120213	0.192633
O35454	Clcn6	Chloride transport protein 6	CLCN6_MOUSE	0	3.43448	0	3.6664	7.10212	4.97755	6.31816	6.49268	Enrich	inf	0.000114294	0.000586398	NotSig	0.376527	0.575628	0.625223	Enrich	inf	0.000227912	0.000805272	NotSig	-0.00773069	0.277521	0.378144	-0.766942	0.0972707	0.164655	6.69269	1.56087	6.25673e-15	2.04867	7.48459e-32
O35465;O35465-2	Fkbp8	Peptidyl-prolyl cis-trans isomerase FKBP8;Isoform 2 of Peptidyl-prolyl cis-trans isomerase FKBP8	FKBP8_MOUSE	0	0	0.881784	2.81992	6.95495	4.53015	4.73651	5.47414	Enrich	inf	8.33394e-08	4.60564e-05	Enrich	inf	0.00111272	0.00774829	Enrich	3.32543	0.0193708	0.0319406	NotSig	2.16921	0.0681023	0.114222	-2.22219	0.00145887	0.0104419	7.89947	0.220419	6.60783e-06	0.519508	2.14977e-07
O35495;O35495-2	Cdk14	Cyclin-dependent kinase 14;Isoform 2 of Cyclin-dependent kinase 14	CDK14_MOUSE	0.384016	0	0	0	5.82762	5.10309	7.04187	5.9715	Enrich	6.88114	0.00057242	0.00201556	Enrich	inf	0.000414634	0.00450174	Enrich	inf	2.79239e-05	0.000569659	NotSig	inf	0.0392136	0.0765482	1.25043	0.00237163	0.0138098	8.70859	2.28942	1.50962e-75	3.58933	1.65233e-164
O35526	Stx1a	Syntaxin-1A	STX1A_MOUSE	0	0	1.28579	4.79988	4.78992	4.73412	6.73557	6.97569	Enrich	inf	0.000154239	0.000720132	Enrich	inf	6.55594e-05	0.00287315	Enrich	3.65838	0.0227532	0.0365503	Enrich	2.18617	0.00071119	0.0131974	1.97818	0.000390612	0.00558556	5.49828	3.33996	1.88767e-11	1.4561	4.51145e-08
O35551;O35551-3;O35551-5	Rabep1	Rab GTPase-binding effector protein 1;Isoform 3 of Rab GTPase-binding effector protein 1;Isoform 5 of Rab GTPase-binding effector protein 1	RABE1_MOUSE	0	0	0	0	5.71099	2.80149	5.15714	4.67938	Enrich	inf	1.54073e-05	0.000201704	NotSig	inf	0.0685858	0.150772	Enrich	inf	8.37416e-05	0.000574046	Enrich	inf	0.0138816	0.0468669	-0.548898	0.0422821	0.0924422	7.97534	-0.213491	0.000511963	-0.339949	0.0402933
O35607	Bmpr2	Bone morphogenetic protein receptor type-2	BMPR2_MOUSE	0	0	0	0.526198	3.24602	1.94481	6.16368	4.65453	NotSig	inf	0.0641773	0.100277	NotSig	inf	0.189952	0.28934	Enrich	inf	0.000116776	0.000599543	Enrich	4.90336	0.00236852	0.0183413	2.21738	0.0793267	0.142051	7.12915	-0.157098	1.9835e-05	0.06791	0.0297078
O35609	Scamp3	Secretory carrier-associated membrane protein 3	SCAM3_MOUSE	1.26149	0.980771	0.845387	3.98392	4.73659	4.78548	8.01809	6.92365	NotSig	1.6847	0.0702446	0.107677	NotSig	2.93013	0.0288499	0.0915762	Enrich	6.80158	0.00277927	0.00623435	Enrich	2.98613	0.000206087	0.0113696	3.35127	4.34484e-05	0.00241353	5.56384	-0.76834	0.720293	-0.144233	0.676578
O35621	Pmm1	Phosphomannomutase 1	PMM1_MOUSE	0	0	0	0	0.977675	0	5.30424	5.50414	NotSig	inf	0.391002	0.443422	NotSig				Enrich	inf	4.81409e-05	0.000569659	NotSig	inf	0.0301453	0.0666392	3.47868	0.0201203	0.0554553	7.59499	0.050197	2.08516e-05	-0.35191	0.810014
O35633;O35633-2	Slc32a1	Vesicular inhibitory amino acid transporter;Isoform 2 of Vesicular inhibitory amino acid transporter	VIAAT_MOUSE	7.50126	7.07025	5.48224	7.72891	8.24509	7.87269	8.63897	8.86839	NotSig	0.647938	0.138594	0.195855	NotSig	0.829763	0.211223	0.309057	Enrich	2.86493	0.0124944	0.0222372	NotSig	1.16014	0.118584	0.180868	0.435417	0.241517	0.330317	4.65371	-0.899006	0.01093	-3.84987	6.69337e-127
O35639	Anxa3	Annexin A3	ANXA3_MOUSE	1.17746	0	1.51985	0	2.19069	3.55378	3.87944	3.89765	NotSig	0.894295	0.586182	0.637658	NotSig	inf	0.0617753	0.145715	NotSig	0.667649	0.283165	0.32483	NotSig	inf	0.249586	0.345439	1.17762	0.394611	0.47288	1.10902	-6.51824	2.95997e-11	-5.00244	3.08128e-07
O35640	Anxa8	Annexin A8	ANXA8_MOUSE	2.06836	0.892205	2.555	1.29204	1.71599	0.680868	0	0	NotSig	-1.05391	0.848721	0.876119	NotSig	-0.955198	0.857265	0.884533	NotSig	#NAME?	0.192843	0.229762	NotSig	#NAME?	0.391002	0.49801	#NAME?	0.221367	0.308889	0			#NAME?	0.390612
O35643	Ap1b1	AP-1 complex subunit beta-1	AP1B1_MOUSE	2.4111	0	0.856595	3.21938	6.76986	4.82177	7.6158	7.58581	Enrich	3.95535	0.0152413	0.0314194	Enrich	inf	0.00121469	0.00815929	Enrich	6.38246	0.00277504	0.00622973	Enrich	4.44284	0.00401824	0.0238801	0.904985	0.0343803	0.0792802	7.7861	2.17239	4.2205e-37	1.85751	1.45802e-46
O35681	Syt3	Synaptotagmin-3	SYT3_MOUSE	0	0	0	0	4.19336	3.92897	7.22959	6.09184	Enrich	inf	5.91643e-05	0.000400661	Enrich	inf	0.00100543	0.00715094	Enrich	inf	3.41701e-05	0.000569659	NotSig	inf	0.0339423	0.0709086	3.12335	2.15531e-05	0.00222767	6.19096	2.88121	4.60703e-14	1.14246	2.49756e-05
O35682	Myadm	Myeloid-associated differentiation marker	MYADM_MOUSE	3.86478	4.70882	3.88663	5.18809	5.06362	5.04696	6.51265	6.40585	NotSig	0.309259	0.42372	0.477039	NotSig	0.299813	0.224299	0.324272	NotSig	1.77629	0.136377	0.169139	Enrich	1.21845	0.00358845	0.0222674	1.49528	0.000848972	0.00778556	4.43113	-0.342038	0.406022	-0.346714	0.958892
O35737	Hnrnph1	Heterogeneous nuclear ribonucleoprotein H	HNRH1_MOUSE	3.51903	2.1565	2.11852	1.18477	7.2443	4.87441	5.65328	4.67037	Enrich	3.49492	0.00617318	0.0147748	NotSig	1.57937	0.118322	0.222115	NotSig	2.24869	0.0673254	0.0915434	NotSig	1.95946	0.0570366	0.0989054	-1.60649	0.00152511	0.0105055	5.37678	-1.22532	0.000317894	-1.8975	6.45505e-28
O35857	Timm44	Mitochondrial import inner membrane translocase subunit TIM44	TIM44_MOUSE	0.821097	0	0.769643	4.39362	0	0	3.78086	4.81736	NotSig	#NAME?	0.391002	0.443422	NotSig				Enrich	2.84809	0.0239777	0.0381966	NotSig	0.411529	0.0785841	0.12791	inf	0.000721454	0.00735172	6.31583	-0.374162	0.180958	-0.062337	0.890042
O35864	Cops5	COP9 signalosome complex subunit 5	CSN5_MOUSE	0.939367	2.05549	1.71636	1.93451	6.15907	4.87515	6.47777	6.01963	Enrich	4.52617	0.00991719	0.0219407	NotSig	1.88296	0.0952274	0.188471	Enrich	4.14495	0.0157127	0.0269811	NotSig	3.23613	0.034364	0.0715005	0.332548	0.302367	0.394468	5.89973	-0.753113	0.403059	-0.458441	0.953669
O35874	Slc1a4	Neutral amino acid transporter A	SATT_MOUSE	0	0.762213	0.693609	4.09385	5.91398	4.20506	5.4052	5.90511	Enrich	inf	1.33294e-06	0.000121922	NotSig	3.3187	0.0164266	0.0592875	Enrich	4.84338	0.00550248	0.011228	NotSig	1.85147	0.0212756	0.0562644	-0.502637	0.0238499	0.0615166	6.69508	0.882147	1.0624e-15	1.71625	7.49943e-31
O35887	Calu	Calumenin	CALU_MOUSE	5.8062	6.48002	5.93628	11.2959	6.19651	7.40254	5.20139	11.0563	NotSig	0.181904	0.498382	0.551973	NotSig	0.865471	0.0347387	0.104369	NotSig	-0.776545	0.175732	0.213002	NotSig	-0.322176	0.459998	0.569878	-0.94074	0.0451358	0.0969733	5.03465	-0.468317	0.176369	-0.480591	0.762184
O35927;O35927-2	Ctnnd2	Catenin delta-2;Isoform 2 of Catenin delta-2	CTND2_MOUSE	0.950008	2.83292	1.53221	4.23985	7.43095	5.9303	8.77035	8.13399	Enrich	5.75672	0.00560978	0.013616	NotSig	-3.25415	0.355567	0.454376	Enrich	6.87657	0.0031863	0.00703191	Enrich	3.89911	0.000550708	0.0127937	1.35015	0.00135307	0.0100838	8.24341	1.51498	4.16266e-49	0.741195	8.42923e-18
O35945	Aldh1a7	Aldehyde dehydrogenase, cytosolic 1	AL1A7_MOUSE	6.24741	6.32926	6.79817	7.12952	8.07944	7.76556	11.0025	10.5813	NotSig	1.1695	0.140652	0.198559	Enrich	1.44029	0.00176812	0.0103594	Enrich	3.58345	0.0171189	0.0289417	NotSig	3.01345	0.0220883	0.0572788	2.86103	0.000775205	0.0075281	4.91678	5.45472	1.39452e-10	4.3235	5.10871e-18
O35954	Pitpnm1	Membrane-associated phosphatidylinositol transfer protein 1	PITM1_MOUSE	0	0.394288	1.30728	1.33435	7.66075	5.70469	7.51817	6.87272	Enrich	inf	2.30335e-05	0.000241764	Enrich	6.87277	9.25194e-05	0.00287315	Enrich	4.36023	0.016486	0.0280955	Enrich	5.44917	0.0040268	0.0238805	-0.132241	0.60391	0.670651	6.83292	1.83396	3.38693e-19	1.92268	1.83777e-31
O35963	Rab33b	Ras-related protein Rab-33B	RB33B_MOUSE	0	0	0	0	0	1.51669	6.49056	6.14353	NotSig				NotSig	inf	0.18959	0.28934	Enrich	inf	8.12416e-05	0.000569659	NotSig	inf	0.0161997	0.0503174	inf	8.12416e-05	0.00273749	4.8102	-0.491776	0.406022	-0.770684	0.299693
O54734	Ddost	Dolichyl-diphosphooligosaccharide--protein glycosyltransferase 48 kDa subunit	OST48_MOUSE	4.7865	4.51014	4.70548	8.42763	4.82262	3.71768	4.21883	8.02304	NotSig	-0.0149598	0.897301	0.916633	NotSig	0.0900281	0.583761	0.63328	NotSig	-0.697376	0.324668	0.369339	NotSig	-0.502227	0.286505	0.388691	-0.625966	0.00429696	0.0200791	6.03542	-0.786341	0.256191	-0.930816	6.12671e-09
O54774	Ap3d1	AP-3 complex subunit delta-1	AP3D1_MOUSE	2.40218	4.15071	1.53692	4.51692	6.40807	5.29269	7.44164	7.32484	Enrich	3.65066	0.0170712	0.0346464	NotSig	1.03417	0.0893752	0.180383	Enrich	5.51351	0.00608078	0.0122255	Enrich	2.79162	0.0010545	0.014224	1.0611	0.00419754	0.0197604	8.87131	0.838646	1.05572e-41	1.58454	3.16582e-65
O54781	Srpk2	SRSF protein kinase 2	SRPK2_MOUSE	0	0	0	1.16876	6.14487	4.04268	5.71704	5.10959	Enrich	inf	3.13889e-06	0.000144409	Enrich	inf	8.85456e-05	0.00287315	Enrich	inf	9.67025e-05	0.000590983	NotSig	2.47842	0.0400188	0.0777836	-0.398329	0.121312	0.19418	8.95376	1.07158	2.82759e-36	0.55661	2.76131e-15
O54828	Rgs9	Regulator of G-protein signaling 9	RGS9_MOUSE	0	0	0.748607	4.09833	0	0	3.35039	4.47792	NotSig				NotSig				NotSig	2.42115	0.0379117	0.0565325	NotSig	0.327847	0.235011	0.327849	inf	0.00015166	0.00359757	3.92453	2.47913	0.155885	-5.45186	1.86357e-190
O54829	Rgs7	Regulator of G-protein signaling 7	RGS7_MOUSE	0	0	0	1.36114	7.16247	5.97113	9.29058	8.17433	Enrich	inf	5.12708e-06	0.000146626	Enrich	inf	0.000173339	0.00311541	Enrich	inf	2.00873e-05	0.000569659	Enrich	6.69906	0.00219618	0.0176902	2.16262	0.000386523	0.00558556	5.78571	1.45195	8.1263e-08	0.281059	0.379053
O54834;O54834-2;O54834-3;O54834-4	Arhgap6	Rho GTPase-activating protein 6;Isoform 2 of Rho GTPase-activating protein 6;Isoform 3 of Rho GTPase-activating protein 6;Isoform 4 of Rho GTPase-activating protein 6	RHG06_MOUSE	0	0	0	0.641734	5.5206	4.52935	6.2999	5.55983	Enrich	inf	2.25477e-05	0.000237572	Enrich	inf	2.50313e-05	0.00270019	Enrich	inf	6.8462e-05	0.000569659	Enrich	5.24011	0.00322029	0.0210822	0.815397	0.0204249	0.0560281	6.70441	1.98509	9.29824e-20	2.05992	1.87592e-28
O54865	Gucy1b1	Guanylate cyclase soluble subunit beta-1	GCYB1_MOUSE	0	0	0.85696	2.52942	6.17779	2.05356	4.00528	3.75649	Enrich	inf	7.72652e-05	0.000464944	NotSig	inf	0.19088	0.289748	Enrich	2.66091	0.0321043	0.0491764	NotSig	0.694367	0.27321	0.373355	-2.25143	0.000215351	0.00421099
O54901	Cd200	OX-2 membrane glycoprotein	OX2G_MOUSE	0	0	0	3.44727	6.35054	4.25799	1.9872	3.81686	Enrich	inf	0.00200015	0.00571176	NotSig	inf	0.0578008	0.145715	NotSig	inf	0.224575	0.263089	NotSig	-0.394054	0.773936	0.816948	-3.20893	0.0355852	0.0810895	7.82385	0.840165	1.15931e-25	1.78193	1.37035e-50
O54916	Reps1	RalBP1-associated Eps domain-containing protein 1	REPS1_MOUSE	0	4.23862	2.96884	1.53149	5.89414	5.19974	6.80952	6.18429	Enrich	inf	0.000197244	0.000850418	NotSig	-2.37979	0.722378	0.763722	NotSig	1.94748	0.110047	0.139989	NotSig	4.57607	0.0428052	0.0811364	1.01442	0.121734	0.194532	4.90992	-0.472692	0.00376511	1.07402	3.20102e-05
O54931;O54931-4	Akap2	A-kinase anchor protein 2;Isoform 4 of A-kinase anchor protein 2	AKAP2_MOUSE	0	1.18882	0	0	6.85024	4.83129	0.788348	2.37026	Enrich	inf	4.52883e-07	9.5355e-05	NotSig	2.10856	0.053381	0.145715	NotSig	inf	0.391002	0.422677	Enrich	inf	0.00432135	0.024892	-5.858	0.00450402	0.0205942	0.884075	0.802326	0.646818	-0.929271	0.390612
O54962	Banf1	Barrier-to-autointegration factor	BAF_MOUSE	1.03668	2.39372	4.24255	2.754	0	5.4064	4.30887	4.57264	NotSig	#NAME?	0.391002	0.443422	NotSig	1.20458	0.142254	0.257237	NotSig	0.0701023	0.667753	0.693622	NotSig	0.239656	0.25864	0.356042	inf	3.15015e-05	0.00241353
O54983	Crym	Ketimine reductase mu-crystallin	CRYM_MOUSE	0.859312	1.03317	1.90662	4.29751	0.736846	3.60503	5.78509	5.44985	NotSig	-0.55044	0.917454	0.933061	NotSig	2.41529	0.163509	0.284456	NotSig	3.11638	0.0348924	0.0526045	Enrich	1.15521	0.00717208	0.0329989	5.1583	0.00274356	0.0151235	0	#NAME?	0.406022	#NAME?	7.81945e-73
O54984	Get3	ATPase GET3	GET3_MOUSE	1.20686	2.45957	2.54167	2.46436	6.67366	5.44638	6.62425	6.04263	Enrich	3.90081	0.0195084	0.0386236	NotSig	1.43558	0.129451	0.238794	NotSig	2.514	0.0695871	0.0941279	NotSig	2.1258	0.0858192	0.137379	-0.051495	0.789111	0.834986
O54988;O54988-2	Slk	STE20-like serine/threonine-protein kinase;Isoform 2 of STE20-like serine/threonine-protein kinase	SLK_MOUSE	0	0	0	0	0.69175	0.618323	3.19261	1.74077	NotSig	inf	0.391002	0.443422	NotSig	inf	0.391002	0.454376	Enrich	inf	0.00251052	0.00568931	NotSig	inf	0.5	0.580066	2.61659	0.02778	0.0688315	6.27939	-1.12253	0.00195859	-1.70296	1.18192e-30
O54991	Cntnap1	Contactin-associated protein 1	CNTP1_MOUSE	3.75917	2.00077	1.53281	6.13802	6.57637	4.64342	4.77941	6.477	Enrich	3.21715	0.014081	0.0292763	NotSig	1.76383	0.10294	0.199724	NotSig	2.81329	0.0332488	0.0506228	NotSig	0.275656	0.284804	0.386569	-2.22629	0.0629862	0.122091	6.90929	1.47682	3.93875e-18	0.892096	1.05982e-07
O55017;O55017-2	Cacna1b	Voltage-dependent N-type calcium channel subunit alpha-1B;Isoform NB2 of Voltage-dependent N-type calcium channel subunit alpha-1B	CAC1B_MOUSE	1.69153	0	0	3.50323	5.18022	4.50824	6.7849	6.95963	NotSig	0.496183	0.129526	0.185105	NotSig	inf	0.0618346	0.145715	Enrich	inf	0.000122613	0.000601014	Enrich	3.02024	0.012721	0.0452069	1.58654	0.0109735	0.0367137	7.65711	3.53852	2.95631e-49	2.3538	7.00043e-52
O55022	Pgrmc1	Membrane-associated progesterone receptor component 1	PGRC1_MOUSE	8.07544	8.26868	7.38938	9.98563	9.46259	8.94942	8.39962	10.018	NotSig	1.18241	0.0601532	0.0967161	NotSig	0.866351	0.37144	0.454376	NotSig	0.976802	0.0764872	0.101924	NotSig	-0.0317019	0.906369	0.928838	-1.01306	0.0290852	0.0703195	7.91753	1.19	1.77976e-23	0.237343	0.000629472
O55023	Impa1	Inositol monophosphatase 1	IMPA1_MOUSE	2.33059	2.26924	2.41639	2.7572	5.87864	5.31278	7.04208	6.68535	NotSig	2.19688	0.0790625	0.119266	NotSig	1.82588	0.101796	0.198081	NotSig	3.1498	0.0464179	0.0670896	NotSig	3.52877	0.0223344	0.0575453	1.18157	7.83315e-05	0.00273122	5.71052	0.072748	0.406022	-0.786978	8.26524e-05
O55026	Entpd2	Ectonucleoside triphosphate diphosphohydrolase 2	ENTP2_MOUSE	0	0	0	0	3.87633	0.720864	1.60743	0	NotSig	inf	0.0665348	0.102793	NotSig	inf	0.391002	0.454376	NotSig	inf	0.182861	0.219855					-2.97063	0.226768	0.315059	2.01377	-3.37908	1.9113e-05	-3.008	0.000423959
O55029	Copb2	Coatomer subunit beta'	COPB2_MOUSE	2.32827	3.4941	3.95653	3.49394	5.39984	3.91509	3.8165	3.39858	NotSig	1.77381	0.106219	0.155126	NotSig	0.405359	0.821344	0.852745	NotSig	-1.43653	0.928958	0.934823	NotSig	-0.921828	0.954472	0.965115	-1.55953	0.012954	0.0406843	6.00191	0.086214	0.00192269	-0.208917	0.0740197
O55042;O55042-2	Snca	Alpha-synuclein;Isoform 2 of Alpha-synuclein	SYUA_MOUSE	7.6671	7.99257	8.59093	9.01382	10.0175	10.7445	13.7329	12.0538	Enrich	2.35013	2.03897e-05	0.000224286	Enrich	2.54988	0.0105539	0.0411031	Enrich	5.26315	0.000405735	0.00121995	Enrich	3.00167	0.00213906	0.0176902	3.82943	0.00096191	0.00828502	8.59525	3.52665	5.89481e-90	-0.490168	0.000673644
O55074;Q7TN79	Akap7	A-kinase anchor protein 7 isoform alpha;A-kinase anchor protein 7 isoform gamma	AKA7A_MOUSE;AKA7G_MOUSE	0	0	0	0	0.902731	0	5.21703	5.71065	NotSig	inf	0.18179	0.245991	NotSig				Enrich	inf	0.000586402	0.00162236	NotSig	inf	0.0329645	0.0699873	4.96682	0.000850116	0.00778556	6.20063	-0.176562	0.028996	1.54675	5.46687e-20
O55091	Impact	Protein IMPACT	IMPCT_MOUSE	2.35047	1.09407	0	0	7.81863	6.02258	6.22396	6.50244	NotSig	4.1714	0.0273465	0.051552	NotSig	3.84447	0.0152948	0.0561161	Enrich	inf	0.000173669	0.000688531	Enrich	inf	0.0146725	0.0483301	-1.54225	0.00770599	0.0290379
O55100;O55100-2	Syngr1	Synaptogyrin-1;Isoform 1B of Synaptogyrin-1	SNG1_MOUSE	1.07065	1.86516	3.2435	5.0983	6.02101	6.63529	10.2428	8.94678	Enrich	3.80779	0.0182998	0.0367868	NotSig	4.06225	0.0184864	0.065131	Enrich	6.44393	0.00609803	0.0122405	Enrich	3.88136	0.000492376	0.0121929	4.2825	4.6611e-05	0.00241353	9.25675	2.15242	9.30284e-96	2.30127	4.27824e-142
O55106	Strn	Striatin	STRN_MOUSE	0	0	0	1.00972	5.24436	0.974699	5.01252	4.81448	Enrich	inf	6.90176e-06	0.000156187	NotSig	inf	0.391002	0.454376	Enrich	inf	0.00022703	0.00080361	NotSig	2.81395	0.0327074	0.0696519	-0.1908	0.407317	0.483898	4.19672	-1.70386	0.000143767	-2.53577	2.25626e-36
O55125	Nipsnap1	Protein NipSnap homolog 1	NIPS1_MOUSE	5.52234	6.02089	5.37404	7.22016	6.3507	5.88091	6.37152	7.53529	NotSig	0.637127	0.179975	0.245991	NotSig	-0.133677	0.71425	0.756825	Enrich	0.977181	0.0202106	0.0330608	NotSig	0.271577	0.253853	0.349966	0.037224	0.916795	0.931276	6.54525	1.78087	6.9473e-13	-0.165817	0.299061
O55126	Nipsnap2	Protein NipSnap homolog 2	NIPS2_MOUSE	1.94512	6.08707	3.01191	5.93904	6.51859	6.12411	4.94975	6.02272	NotSig	1.00236	0.0961803	0.141897	NotSig	-0.242904	0.95767	0.969109	NotSig	-0.106074	0.353962	0.399495	NotSig	0.00433801	0.824936	0.862363	-1.74712	0.0747411	0.137334
O55131	Septin7	Septin-7	SEPT7_MOUSE	4.46831	6.09393	4.75002	6.51279	7.45844	7.22575	10.2097	9.81498	Enrich	2.87917	0.00440271	0.0110268	NotSig	1.09963	0.0315849	0.0975793	Enrich	5.25741	0.00128579	0.00315025	Enrich	3.27692	0.000716065	0.0131974	2.74958	0.000117377	0.00310375
O55135	Eif6	Eukaryotic translation initiation factor 6	IF6_MOUSE	2.68168	1.17388	5.93407	4.42775	5.8099	4.78379	4.52512	5.04648	NotSig	1.53923	0.135343	0.191754	NotSig	2.43563	0.0463304	0.130688	NotSig	-1.99934	0.158605	0.193304	NotSig	0.39837	0.52547	0.603883	-1.37166	0.0101854	0.0350912	5.18302	-0.617277	0.146733	-0.482739	0.664335
O55143	Atp2a2	Sarcoplasmic/endoplasmic reticulum calcium ATPase 2	AT2A2_MOUSE	5.54477	5.78659	6.09369	6.89879	7.38891	6.32288	8.36064	7.8712	Enrich	1.80187	0.00393085	0.0100671	NotSig	0.587256	0.207126	0.30406	Enrich	2.09868	0.0105771	0.0193752	Enrich	0.946286	0.0115389	0.0429549	0.975713	0.00360265	0.0178224	8.1232	-0.131754	0.000125989	-1.32038	2.20531e-44
O55229	Chkb	Choline/ethanolamine kinase	CHKB_MOUSE	0	0	0	0	2.33145	1.88648	4.8628	5.08719	NotSig	inf	0.185408	0.246554	NotSig	inf	0.184355	0.288495	Enrich	inf	0.000520595	0.00148173	NotSig	inf	0.0288462	0.0651822	1.20507	0.15892	0.242187	4.68912	-0.218185	0.10392	1.42344	1.13715e-06
O55234	Psmb5	Proteasome subunit beta type-5	PSB5_MOUSE	4.7705	3.25992	4.81595	4.84424	6.71782	5.20881	6.68953	6.48364	Enrich	1.94483	0.000846441	0.00278768	NotSig	1.33192	0.181005	0.288495	NotSig	1.51156	0.0484328	0.0694769	Enrich	1.57686	0.00966858	0.0393178	-0.0172934	0.899404	0.919094	4.93993	-1.46935	0.000273479	-1.78273	6.56296e-13
O55242;O55242-2	Sigmar1	Sigma non-opioid intracellular receptor 1;Isoform 2 of Sigma non-opioid intracellular receptor 1	SGMR1_MOUSE	0.855947	0	2.87838	6.20287	5.2265	4.16178	5.54322	6.43321	Enrich	3.91919	0.013647	0.0284959	Enrich	inf	0.000845492	0.00637113	NotSig	1.9886	0.0801043	0.105901	NotSig	0.201774	0.457094	0.566531	0.324039	0.100368	0.168777	4.71536	-0.367475	0.422124	0.168099	0.0735726
O70152	Dpm1	Dolichol-phosphate mannosyltransferase subunit 1	DPM1_MOUSE	0	0	1.01065	0.84222	5.88195	3.36389	4.39839	2.05449	Enrich	inf	6.0356e-05	0.000402148	NotSig	inf	0.0586079	0.145715	NotSig	2.40979	0.041904	0.0615264	NotSig	1.80086	0.661449	0.723476	-1.53022	0.00101548	0.00859296	4.56937	-0.742949	0.277912	-0.756221	0.765366
O70161	Pip5k1c	Phosphatidylinositol 4-phosphate 5-kinase type-1 gamma	PI51C_MOUSE	1.02499	1.88566	2.19018	4.08049	8.12222	6.39753	8.97356	8.08167	Enrich	6.11757	0.00579431	0.0140391	NotSig	3.53926	0.0251415	0.0830763	Enrich	5.69973	0.0113623	0.0205473	Enrich	4.0065	0.00027466	0.0113696	0.887139	0.0237061	0.061255	6.2086	0.744043	3.22777e-09	0.825202	1.62537e-07
O70166	Stmn3	Stathmin-3	STMN3_MOUSE	0	0	0	0	4.88163	4.43215	6.02499	4.99248	Enrich	inf	0.000328423	0.00128839	Enrich	inf	6.64245e-06	0.00160627	Enrich	inf	0.000212561	0.000772274	NotSig	inf	0.0292778	0.0655873	1.16661	0.0237636	0.0613486	9.53539	1.71559	4.15952e-91	0.662904	5.10401e-29
O70174	Chrna4	Neuronal acetylcholine receptor subunit alpha-4	ACHA4_MOUSE	0	0	0	0	4.82019	3.69616	6.34513	5.57041	Enrich	inf	2.41861e-05	0.000247745	Enrich	inf	0.0001302	0.00300666	Enrich	inf	0.000130424	0.000615553	Enrich	inf	0.0106515	0.0413081	1.60683	0.00453332	0.0205942	9.29473	4.21314	1.33468e-144	7.04268	1.24527e-251
O70228	Atp9a	Probable phospholipid-transporting ATPase IIA	ATP9A_MOUSE	1.72206	0	0	2.87924	5.71676	3.65474	5.48815	5.36975	Enrich	3.42611	0.0250248	0.0478902	NotSig	inf	0.0590179	0.145715	Enrich	inf	7.87142e-05	0.000569659	NotSig	1.98039	0.0818238	0.132264	-0.255853	0.456107	0.530106	8.93804	1.39538	5.97866e-45	1.68485	3.21392e-75
O70251	Eef1b	Elongation factor 1-beta	EF1B_MOUSE	3.34194	3.47372	3.05056	1.40025	6.60272	5.87598	4.95593	1.89681	NotSig	1.82992	0.0928336	0.137328	NotSig	1.51506	0.146097	0.261948	NotSig	-0.194256	0.365874	0.411644	NotSig	-0.885315	0.851315	0.882367	-1.68885	0.0149208	0.0445623
O70252	Hmox2	Heme oxygenase 2	HMOX2_MOUSE	1.84361	0.969644	0.918691	4.3998	6.02828	4.71677	4.94477	4.99276	NotSig	3.41094	0.0291692	0.0543617	NotSig	2.94811	0.0269403	0.0874983	Enrich	3.39022	0.0188183	0.0312441	NotSig	0.590903	0.0481874	0.0878016	-1.07151	0.0109886	0.0367218	5.81785	-0.952195	0.00164781	-1.0256	4.28493e-06
O70305;O70305-2;O70305-3	Atxn2	Ataxin-2;Isoform 2 of Ataxin-2;Isoform 3 of Ataxin-2	ATX2_MOUSE	0	0	0	0	4.69797	2.17222	3.80651	2.59674	Enrich	inf	6.57598e-06	0.000153254	NotSig	inf	0.0591244	0.145715	Enrich	inf	0.000223971	0.000796251	NotSig	inf	0.0241223	0.0593524	-0.910572	0.0103683	0.0355098	7.44437	0.632539	2.39595e-08	1.49885	3.80022e-31
O70309	Itgb5	Integrin beta-5	ITB5_MOUSE	4.03666	3.99191	5.84579	6.75039	6.98383	5.88444	7.98697	6.77066	NotSig	2.09138	0.121877	0.175478	NotSig	1.04345	0.251181	0.356152	Enrich	2.3284	0.0137661	0.0241855	NotSig	-0.0529747	0.945525	0.957791	0.99943	0.195185	0.282856	2.90519	-4.05284	4.96717e-06	-3.42167	0.0268809
O70318	Epb41l2	Band 4.1-like protein 2	E41L2_MOUSE	0	0	0	3.40226	2.46111	1.27265	2.56078	3.97877	Enrich	inf	0.00431096	0.0108365	NotSig	inf	0.183656	0.288495	Enrich	inf	0.00770319	0.0149631	NotSig	0.588759	0.0446191	0.0835604	0.178112	0.851289	0.880714
O70325;O70325-2;O70325-3	Gpx4	Phospholipid hydroperoxide glutathione peroxidase;Isoform Cytoplasmic of Phospholipid hydroperoxide glutathione peroxidase;Isoform Nuclear of Phospholipid hydroperoxide glutathione peroxidase	GPX4_MOUSE	0.764802	0.771302	0.843284	4.66057	6.3428	5.22593	7.26487	7.05519	Enrich	5.47178	0.0044275	0.0110687	Enrich	4.37664	0.00625876	0.0272476	Enrich	6.07544	0.00327611	0.00720794	Enrich	2.40007	0.000752706	0.0132077	0.95554	0.0171431	0.0495626	3.92216	-2.93476	2.06116e-11	-1.19213	0.0777415
O70370	Ctss	Cathepsin S	CATS_MOUSE	5.44691	5.66265	4.10641	9.39541	5.59758	5.81734	4.90935	9.27955	NotSig	-0.196726	0.832788	0.861937	NotSig	0.175585	0.780195	0.814809	NotSig	-0.404551	0.617135	0.644543	NotSig	-0.172965	0.656984	0.719503	-0.709738	0.0125014	0.0398888	1.31689	-6.88886	0.00381419	-7.84366	1.6238e-11
O70435	Psma3	Proteasome subunit alpha type-3	PSA3_MOUSE	5.68564	4.70537	5.72479	5.24521	7.03546	5.76781	6.64947	6.59293	Enrich	1.36977	0.00547055	0.0133382	NotSig	0.960825	0.094406	0.187403	NotSig	0.788417	0.122046	0.153913	NotSig	1.11126	0.069736	0.116595	-0.386111	0.306234	0.398311	6.25207	-0.13593	0.101224	0.129144	0.0547298
O70439	Stx7	Syntaxin-7	STX7_MOUSE	0	0	1.04941	4.013	7.13086	6.10534	8.37086	7.49326	Enrich	inf	1.93423e-05	0.000219207	Enrich	inf	5.94914e-05	0.00270019	Enrich	6.32723	0.00426343	0.00903381	Enrich	3.53275	0.00535823	0.0279963	1.30011	0.0148864	0.0445623	6.12316	-0.676481	0.0937905	-0.387597	0.487408
O70443	Gnaz	Guanine nucleotide-binding protein G(z) subunit alpha	GNAZ_MOUSE	2.20194	1.52967	2.35287	4.93929	8.23692	6.49275	8.77319	8.22149	Enrich	5.82631	0.00426848	0.0107494	Enrich	4.77179	0.0058877	0.0261021	Enrich	5.14415	0.016839	0.0286034	Enrich	3.22762	0.00404672	0.0238836	0.574978	0.0762292	0.138868	8.06911	1.83845	1.92574e-45	2.2188	3.6471e-71
O70456	Sfn	14-3-3 protein sigma	1433S_MOUSE	2.67374	1.37321	2.6061	3.47173	3.6218	1.30655	0.74328	0	NotSig	-1.02831	0.674984	0.719739	NotSig	-0.273301	0.97309	0.978717	NotSig	-4.05673	0.352173	0.397633	NotSig	#NAME?	0.104797	0.162574	-3.64711	0.101572	0.169815	1.20137	1.12999	0.730655	2.15256	0.493113
O70492	Snx3	Sorting nexin-3	SNX3_MOUSE	0	0.547994	0.811552	0	7.04829	4.89104	5.35253	3.97326	Enrich	inf	0.00010137	0.000548067	Enrich	5.10601	0.001162	0.00802833	Enrich	4.3279	0.0070849	0.0139223	Enrich	inf	0.00588225	0.0295367	-1.68573	0.00587485	0.0242395	6.44011	-1.4753	8.43071e-08	-1.67979	5.24858e-29
O70493	Snx12	Sorting nexin-12	SNX12_MOUSE	0.964115	0	1.22099	0.72798	7.69754	6.61957	8.6821	7.34773	Enrich	5.96942	0.00506585	0.0124719	Enrich	inf	6.76402e-05	0.00287315	Enrich	5.8963	0.00757005	0.0147635	Enrich	6.64085	0.00215919	0.0176902	1.00789	0.0169002	0.0490072	5.12837	0.672147	0.0051421	0.487451	0.0129404
O70503	Hsd17b12	Very-long-chain 3-oxoacyl-CoA reductase	DHB12_MOUSE	5.61967	5.98167	3.97857	5.66231	6.58216	6.35872	5.73828	6.09689	NotSig	0.81518	0.108815	0.158479	NotSig	0.363766	0.135069	0.24693	NotSig	0.866027	0.27832	0.320297	NotSig	0.378639	0.168584	0.247075	-0.832874	0.00919484	0.0327305	6.47	-0.84394	0.0963521	-0.150374	9.27326e-05
O70507	Hcn4	Potassium/sodium hyperpolarization-activated cyclic nucleotide-gated channel 4	HCN4_MOUSE	0	0	0	0	5.39248	3.30004	5.61598	5.23727	Enrich	inf	6.9279e-05	0.000431035	NotSig	inf	0.0596378	0.145715	Enrich	inf	0.000185046	0.000715494	Enrich	inf	0.0132971	0.0458069	0.260987	0.487202	0.560176	2.62981	3.52986	0.0118114	4.78827	0.000343474
O70579	Slc25a17	Peroxisomal membrane protein PMP34	PM34_MOUSE	1.00756	0.83164	0.694389	1.71618	0.956273	1.93222	3.1088	3.6534	NotSig	-0.219582	0.97175	0.978153	NotSig	1.59924	0.462079	0.520156	NotSig	3.75411	0.161008	0.196066	NotSig	1.20249	0.150265	0.223252	2.58472	0.228429	0.316756	4.68659	-0.022442	0.424362	-0.590197	0.0480937
O70582	Alox12b	Arachidonate 12-lipoxygenase, 12R-type	LX12B_MOUSE	5.53432	2.60707	4.15324	5.03798	5.00792	2.79425	2.99981	4.6376	NotSig	-0.645568	0.324038	0.401259	NotSig	0.225183	0.936131	0.951426	NotSig	-1.68917	0.534342	0.562992	NotSig	-0.632418	0.552742	0.627274	-1.50087	0.139469	0.218175	0
O70589	Cask	Peripheral plasma membrane protein CASK	CSKP_MOUSE	0	1.62927	3.80748	5.97131	5.89737	5.58531	8.78753	8.14264	Enrich	inf	7.87513e-05	0.000469774	NotSig	1.14315	0.091433	0.183141	NotSig	1.15109	0.122853	0.154793	NotSig	0.0912606	0.206766	0.293694	2.90615	3.57675e-05	0.00241353	6.14279	-0.109352	0.00294281	0.419	0.0039176
O70622;O70622-2	Rtn2	Reticulon-2;Isoform 2 of Reticulon-2	RTN2_MOUSE	0.790169	0.804475	0	0	0	0	3.5245	1.74795	NotSig	#NAME?	0.391002	0.443422	NotSig	#NAME?	0.391002	0.454376	Enrich	inf	0.0256307	0.0403814	NotSig	inf	0.5	0.580066	inf	0.0256307	0.0647254	5.92623	0.497677	0.176763	1.35589	7.55566e-08
O88312	Agr2	Anterior gradient protein 2 homolog	AGR2_MOUSE	0	0	0	0	1.69125	1.76311	1.93301	0	NotSig	inf	0.391002	0.443422	NotSig	inf	0.391002	0.454376	NotSig	inf	0.186333	0.223024					-1.90798	0.909868	0.926745	0
O88319	Ntsr1	Neurotensin receptor type 1	NTR1_MOUSE	0	0	0	0	6.16239	2.42747	4.75549	3.47802	Enrich	inf	0.000104506	0.000553393	NotSig	inf	0.189963	0.28934	Enrich	inf	0.000173197	0.000688531	NotSig	inf	0.0185027	0.0532355	-1.45239	0.00357751	0.0178224	7.59815	5.99141	1.20137e-60	10.8847	8.18776e-106
O88342	Wdr1	WD repeat-containing protein 1	WDR1_MOUSE	4.40341	4.57945	3.28969	5.34643	7.13403	6.16351	7.7586	7.717	Enrich	2.6788	0.00318642	0.0084055	NotSig	1.65123	0.0158865	0.0578087	Enrich	3.87658	0.0250118	0.0395365	Enrich	2.38027	0.00926508	0.0381881	0.665274	0.0469143	0.0997575	6.98943	0.26018	3.00792e-05	1.50789	1.37708e-30
O88343	Slc4a4	Electrogenic sodium bicarbonate cotransporter 1	S4A4_MOUSE	6.20846	5.96399	3.99522	6.98035	8.18223	6.74495	7.82967	8.44194	Enrich	1.8571	0.0105516	0.0231026	NotSig	0.842664	0.158388	0.279385	Enrich	3.78119	0.000854627	0.00222498	NotSig	1.46784	0.0309179	0.0677398	-0.311541	0.260731	0.351775	5.30342	-5.31642	4.01999e-50	-3.38443	2.14418e-98
O88384	Vti1b	Vesicle transport through interaction with t-SNAREs homolog 1B	VTI1B_MOUSE	0	0.757717	0	1.5681	6.37304	4.74933	5.16329	4.15841	Enrich	inf	0.000158261	0.000735079	Enrich	3.88234	0.0113972	0.043937	Enrich	inf	0.000206305	0.000755924	NotSig	-0.175758	0.197088	0.282085	-1.26161	0.0145949	0.0439687	6.34836	-0.836956	0.775394	-1.47049	2.64225e-23
O88441	Mtx2	Metaxin-2	MTX2_MOUSE	0	0	0	3.56278	6.06528	0	5.47088	6.11083	Enrich	inf	0.000135113	0.000656467	NotSig				Enrich	inf	8.77488e-05	0.000580051	NotSig	1.81124	0.120732	0.183845	-0.628739	0.101102	0.16942	5.22562	0.130821	0.191988	-0.953894	3.60799e-05
O88444	Adcy1	Adenylate cyclase type 1	ADCY1_MOUSE	0	0	0	2.54428	2.78984	3.03167	5.75188	5.4458	NotSig	inf	0.0672225	0.103622	NotSig	inf	0.0634352	0.145715	Enrich	inf	4.42085e-05	0.000569659	NotSig	2.55518	0.0429277	0.0813138	2.40237	0.0565964	0.113585	6.83892	1.868	5.27555e-20	1.83508	6.67102e-27
O88447	Klc1	Kinesin light chain 1	KLC1_MOUSE	0	0	0	1.93681	6.15477	6.07439	8.71724	7.79788	Enrich	inf	6.03034e-05	0.000402148	Enrich	inf	7.05259e-05	0.00287315	Enrich	inf	3.30093e-05	0.000569659	Enrich	5.01872	0.0126764	0.0451611	2.58723	0.000116946	0.00310375	9.4113	0.974487	4.31214e-54	1.01723	6.76954e-50
O88448	Klc2	Kinesin light chain 2	KLC2_MOUSE	1.76205	0	0	2.11619	6.11444	5.79571	8.46058	7.40115	NotSig	1.10254	0.0891032	0.132573	Enrich	inf	0.000256067	0.00351264	Enrich	inf	3.06039e-05	0.000569659	Enrich	5.03916	0.0054966	0.0284548	2.35604	0.000201558	0.00413694	6.91045	1.49488	1.41653e-14	1.03006	4.38363e-12
O88456	Capns1	Calpain small subunit 1	CPNS1_MOUSE	5.03221	3.2711	5.63364	4.48331	6.93146	5.68476	5.40721	5.66799	Enrich	1.83307	0.00664052	0.0157155	NotSig	1.5145	0.130741	0.240838	NotSig	-0.518775	0.762853	0.782211	NotSig	0.644913	0.223485	0.313324	-1.43003	0.0222418	0.0589945	7.70418	-0.5005	0.606953	0.358876	2.90939e-16
O88485	Dync1i1	Cytoplasmic dynein 1 intermediate chain 1	DC1I1_MOUSE	0	0	0	0	5.80384	4.60466	5.64259	5.62066	Enrich	inf	1.72402e-06	0.000123389	Enrich	inf	0.00187454	0.0107565	Enrich	inf	0.000138036	0.000627615	NotSig	inf	0.021333	0.0563072	-0.118606	0.530216	0.600566	7.4635	2.1989	8.1301e-34	1.16858	1.76212e-22
O88487	Dync1i2	Cytoplasmic dynein 1 intermediate chain 2	DC1I2_MOUSE	0	0	0	0	4.49244	3.12677	4.35287	4.33018	Enrich	inf	3.82214e-06	0.000146061	NotSig	inf	0.0638065	0.145812	Enrich	inf	3.85811e-05	0.000569659	Enrich	inf	9.88279e-05	0.0113696	-0.135816	0.32374	0.415663	8.6913	-0.485765	0.578215	-0.129294	0.0280276
O88492;O88492-2	Plin4	Perilipin-4;Isoform 2 of Perilipin-4	PLIN4_MOUSE	4.75368	4.86601	1.64987	2.89654	9.71389	6.05506	8.51802	6.19114	Enrich	4.84511	0.000435897	0.00161989	NotSig	2.82276	0.399145	0.461219	Enrich	6.53564	0.00227822	0.00522478	NotSig	5.80823	0.503519	0.583186	-1.02083	0.0762477	0.138868	0.452736	#NAME?	0.0120823
O88507	Cntfr	Ciliary neurotrophic factor receptor subunit alpha	CNTFR_MOUSE	0	0	0	3.59224	5.04227	2.73014	2.03843	3.31619	Enrich	inf	0.0110399	0.023943	NotSig	inf	0.0613696	0.145715	Enrich	inf	0.00415733	0.00883509	NotSig	-0.43066	0.507852	0.587236	-4.06768	0.0389287	0.0866927	3.64168	-1.64729	0.0009364	-1.04659	0.769109
O88532	Zfr	Zinc finger RNA-binding protein	ZFR_MOUSE	0	0	0	0	3.68171	0	0	0	Enrich	inf	0.000674057	0.00230283	NotSig				NotSig								#NAME?	0.000674057	0.00707812	8.55526	0.337548	5.7265e-16	-0.093941	0.111638
O88533	Ddc	Aromatic-L-amino-acid decarboxylase	DDC_MOUSE	0	0	0.988245	4.06744	9.49786	8.57337	11.2922	11.0277	Enrich	inf	7.28165e-07	9.5355e-05	Enrich	inf	0.000185604	0.00316145	Enrich	9.47915	0.00136028	0.00331369	Enrich	7.03101	0.00114426	0.0146456	1.83549	0.00206613	0.0125882	10.5258	3.62065	6.93134e-225	7.30369	0
O88543	Cops3	COP9 signalosome complex subunit 3	CSN3_MOUSE	0	2.28937	0	5.04249	6.83136	5.61337	8.09796	6.92208	Enrich	inf	3.98323e-05	0.000327961	NotSig	-1.41673	0.243084	0.347076	Enrich	inf	5.93329e-05	0.000569659	NotSig	-0.172525	0.354838	0.466098	1.29867	0.00686979	0.0266504	6.21301	0.076953	0.0167837	-0.008084	0.515145
O88544	Cops4	COP9 signalosome complex subunit 4	CSN4_MOUSE	0	0	0	0	5.24702	3.05014	5.90122	5.75314	Enrich	inf	6.92903e-06	0.000156187	NotSig	inf	0.0634352	0.145715	Enrich	inf	8.02262e-05	0.000569659	NotSig	inf	0.0191796	0.0539718	0.700826	0.0370732	0.0836893	6.02454	-0.107358	0.192998	-0.494785	0.877478
O88545	Cops6	COP9 signalosome complex subunit 6	CSN6_MOUSE	0	0	0	0.586233	6.11829	4.7633	6.80263	6.13396	Enrich	inf	4.68267e-05	0.000352804	Enrich	inf	0.000111009	0.00287315	Enrich	inf	6.42723e-05	0.000569659	Enrich	6.10003	0.00133866	0.0151013	0.703574	0.0458569	0.0982309	6.41385	-0.588866	0.596955	-0.795904	0.000423316
O88569;O88569-2;O88569-3	Hnrnpa2b1	Heterogeneous nuclear ribonucleoproteins A2/B1;Isoform 2 of Heterogeneous nuclear ribonucleoproteins A2/B1;Isoform 3 of Heterogeneous nuclear ribonucleoproteins A2/B1	ROA2_MOUSE	3.31839	2.46701	4.47308	3.68429	8.8045	5.98607	4.75792	3.33967	Enrich	4.62602	0.0169402	0.0344059	NotSig	2.15965	0.0875018	0.177135	NotSig	0.272886	0.53028	0.558918	NotSig	-0.698015	0.61053	0.680222	-4.12622	8.94187e-05	0.00285513	7.50821	-2.00868	6.24254e-28	-1.94153	6.40318e-76
O88587;O88587-2	Comt	Catechol O-methyltransferase;Isoform Soluble of Catechol O-methyltransferase	COMT_MOUSE	0	0	0	0	4.92257	1.07794	4.05057	1.69783	Enrich	inf	9.4547e-05	0.000524202	NotSig	inf	0.391002	0.454376	Enrich	inf	0.00126211	0.00310283	NotSig	inf	0.5	0.580066	-0.813665	0.0769218	0.139481	6.38466	-0.714649	0.144632	-0.939742	1.01729e-09
O88643	Pak1	Serine/threonine-protein kinase PAK 1	PAK1_MOUSE	2.69939	4.27022	1.38382	5.28329	7.57054	6.70348	9.21568	8.32793	NotSig	3.00623	0.054281	0.0935293	NotSig	1.39292	0.193853	0.291651	Enrich	5.75472	0.0099133	0.0184324	Enrich	3.03647	0.0132259	0.0458069	1.66505	0.00126149	0.00968045	7.00232	-0.895005	0.00231424	-0.000501	0.00768127
O88653	Lamtor3	Ragulator complex protein LAMTOR3	LTOR3_MOUSE	0	0	0	0.890785	3.80078	2.86853	4.83084	4.80803	NotSig	inf	0.0613301	0.0975465	NotSig	inf	0.0594462	0.145715	Enrich	inf	0.000226349	0.000802769	NotSig	3.33097	0.0198032	0.0543047	0.0999861	0.489035	0.56206	4.30005	-1.26253	0.646818	-1.43724	1.38665e-05
O88685	Psmc3	26S proteasome regulatory subunit 6A	PRS6A_MOUSE	5.35205	3.65037	5.01236	5.05757	7.30017	6.11933	6.95906	6.64248	NotSig	0.581518	0.35867	0.439155	NotSig	1.43656	0.165768	0.287822	NotSig	1.35073	0.0814987	0.107503	NotSig	1.28971	0.075236	0.123533	-0.38798	0.267075	0.358097	6.81207	-0.904884	0.0197095	-0.900621	8.03827e-08
O88689;Q91Y11;Q91Y13;Q91Y20	Pcdha4;Pcdha9;Pcdha7;Pcdha10	Protocadherin alpha-4;Protocadherin alpha-9;Protocadherin alpha-7;Protocadherin alpha-10	PCDA4_MOUSE;PCDA9_MOUSE;PCDA7_MOUSE;PCDAA_MOUSE	0	0	0	0	0	0	5.08837	4.63063	NotSig				NotSig				Enrich	inf	0.000178682	0.000697468	NotSig	inf	0.0401787	0.0779105	inf	0.000178682	0.00383042
O88712	Ctbp1	C-terminal-binding protein 1	CTBP1_MOUSE	4.16667	5.23171	5.16059	5.08442	7.21836	6.80128	9.91906	9.17407	NotSig	2.03414	0.118622	0.171254	Enrich	1.60605	0.00229218	0.0124942	Enrich	4.62912	0.000601537	0.00165784	Enrich	4.08462	0.000113439	0.0113696	2.73527	0.000201232	0.00413694	7.67437	0.168363	0.000182105	0.59689	1.11936e-12
O88737	Bsn	Protein bassoon	BSN_MOUSE	2.34825	2.7212	1.70068	4.64424	5.27209	5.67295	9.6159	9.03116	NotSig	1.34769	0.130094	0.185753	NotSig	1.36836	0.155735	0.275803	Enrich	7.30308	0.00287259	0.00643361	Enrich	4.41746	0.000322248	0.0114227	4.33306	0.000146879	0.00357201	7.87654	3.43226	2.30804e-58	2.51322	1.71861e-73
O88741	Gdap1	Ganglioside-induced differentiation-associated protein 1	GDAP1_MOUSE	1.07222	0	1.00341	4.7499	7.51146	5.21002	6.87282	7.26237	Enrich	5.33099	0.0080771	0.0185719	Enrich	inf	0.00138903	0.0088563	Enrich	5.00509	0.00761136	0.0148148	Enrich	2.5494	0.00162405	0.0155809	-0.617587	0.105677	0.17516	8.74999	2.24687	2.80794e-74	1.75627	8.94103e-73
O88746	Tom1	Target of Myb protein 1	TOM1_MOUSE	0	0	0	0	4.98871	3.04801	5.33762	5.18961	Enrich	inf	5.32636e-06	0.000146663	NotSig	inf	0.0615718	0.145715	Enrich	inf	0.000158239	0.000660827	Enrich	inf	0.0116907	0.0431833	0.402274	0.216177	0.303845	3.40305	-1.1017	0.85209	1.86438	3.78517e-05
O88811	Stam2	Signal transducing adapter molecule 2	STAM2_MOUSE	0	0	0	0	4.77936	2.47331	5.80416	4.68932	Enrich	inf	5.46712e-05	0.000381588	NotSig	inf	0.0776532	0.162689	Enrich	inf	0.000120979	0.000599543	NotSig	inf	0.0255684	0.0611163	1.08154	0.0108806	0.0365413	3.80367	-0.6687	0.0965019	-0.642667	0.183248
O88834;O88834-2	Shd	SH2 domain-containing adapter protein D;Isoform 2 of SH2 domain-containing adapter protein D	SHD_MOUSE	2.21101	2.32552	2.03602	3.39984	4.99121	5.08358	7.54409	5.78396	NotSig	-1.88693	0.297641	0.37358	NotSig	-1.68623	0.331871	0.450125	NotSig	1.92935	0.0681746	0.0924789	NotSig	0.0274525	0.315946	0.421912	3.11435	0.028126	0.0692738	4.51933	-0.200161	0.406022	2.48504	2.72623e-09
O88844	Idh1	Isocitrate dehydrogenase [NADP] cytoplasmic	IDHC_MOUSE	5.00997	4.29834	4.85652	5.01122	6.16181	5.97481	7.02799	7.20842	NotSig	0.549448	0.242102	0.30909	NotSig	0.673998	0.331489	0.45009	Enrich	2.10152	0.00507636	0.0104702	NotSig	1.93011	0.0316525	0.0685901	0.930199	0.0398007	0.0881279	5.55831	-0.504348	0.677271	0.049172	2.72076e-07
O88845	Akap10	A-kinase anchor protein 10, mitochondrial	AKA10_MOUSE	0	0	0	0	3.42422	0.796196	4.90319	4.59478	Enrich	inf	0.00416396	0.0105344	NotSig	inf	0.391002	0.454376	Enrich	inf	0.000104601	0.000590983	NotSig	inf	0.0367402	0.0737909	1.42065	0.0339256	0.0785444	3.40172	0.130671	0.573987	0.318794	0.192779
O88848;O88848-2	Arl6	ADP-ribosylation factor-like protein 6;Isoform 2 of ADP-ribosylation factor-like protein 6	ARL6_MOUSE	0	0	0	0	0.792644	0.738269	3.70954	2.95537	NotSig	inf	0.391002	0.443422	NotSig	inf	0.391002	0.454376	Enrich	inf	3.75145e-05	0.000569659	NotSig	inf	0.0305091	0.0670555	2.60454	0.0337562	0.078215	3.9148	-0.401412	1	-1.65352	3.86802e-08
O88935	Syn1	Synapsin-1	SYN1_MOUSE	5.30092	5.84763	5.38386	6.44394	7.51351	7.41777	10.4027	9.38757	Enrich	2.12565	0.00537824	0.013182	NotSig	1.5473	0.0420139	0.121343	Enrich	5.00174	0.000101528	0.000590983	Enrich	2.91129	0.000728145	0.0131974	2.88723	7.88097e-06	0.00192648	8.07817	2.06257	1.40763e-43	1.59225	4.99472e-45
O88935-1	Syn1	Isoform Ib of Synapsin-1	SYN1_MOUSE	5.80636	6.42716	5.75895	6.70005	8.09274	7.96683	10.5364	9.76215	Enrich	2.17246	0.00743734	0.0172306	NotSig	1.51816	0.0144825	0.053579	Enrich	4.83143	9.70943e-06	0.000569659	Enrich	3.0217	0.00199581	0.0171043	2.47441	0.000185575	0.0039201	8.07817	2.06257	1.40763e-43	1.59225	4.99472e-45
O88951	Lin7b	Protein lin-7 homolog B	LIN7B_MOUSE	1.54035	0	0	0	4.56145	3.36026	5.32283	4.59702	NotSig	0.431316	0.143669	0.202195	Enrich	inf	0.00117596	0.00805771	Enrich	inf	0.000303022	0.000983452	Enrich	inf	0.0122998	0.0444978	0.785882	0.0882687	0.153845	5.43713	1.10331	0.000492778	-1.29746	2.85751e-17
O88958	Gnpda1	Glucosamine-6-phosphate isomerase 1	GNPI1_MOUSE	0	0	0.967414	0	6.32777	5.39595	7.99883	6.87738	Enrich	inf	0.000100232	0.000546823	Enrich	inf	1.2355e-05	0.00205403	Enrich	6.2842	0.00390628	0.00840745	NotSig	inf	0.0198097	0.0543047	1.68902	0.00249959	0.0142208	2.83935	1.9655	0.0186792	0.143761	0.229712
O88983	Stx8	Syntaxin-8	STX8_MOUSE	0	0	0	1.60283	4.77548	2.08846	4.138	4.24421	Enrich	inf	0.000174067	0.000786119	NotSig	inf	0.181993	0.288495	Enrich	inf	0.000624167	0.00170872	NotSig	1.98866	0.0702622	0.117076	-0.627648	0.115093	0.186746	4.38325	-1.54178	0.044821	-1.3405	0.0186806
O88998;O88998-3	Olfm1	Noelin;Isoform 3 of Noelin	NOE1_MOUSE	0	0	1.63911	4.01343	2.3908	1.31633	1.46933	5.38222	NotSig	inf	0.194462	0.25526	NotSig	inf	0.18628	0.288495	NotSig	-0.353562	0.898561	0.907737	NotSig	0.355894	0.390652	0.49801	-2.27248	0.605686	0.672365	6.58089	-0.78166	0.216275	0.12429	0.000178759
O89026	Robo1	Roundabout homolog 1	ROBO1_MOUSE	0	0	0	0	4.02437	3.58274	6.84761	5.7173	Enrich	inf	0.00207152	0.00589108	Enrich	inf	0.00776699	0.0322815	Enrich	inf	4.15826e-05	0.000569659	NotSig	inf	0.0191299	0.053936	2.77236	0.00252061	0.0142915	6.05252	2.05615	8.10389e-14	0.66145	9.71902e-07
O89051	Itm2b	Integral membrane protein 2B	ITM2B_MOUSE	0	0	0	5.00077	0	0	1.18168	5.13471	NotSig				NotSig				NotSig	inf	0.185817	0.222557	NotSig	0.103075	0.646291	0.711883	inf	0.185817	0.272281	8.29147	-2.35444	2.5271e-62	-2.13109	1.35856e-57
O89053	Coro1a	Coronin-1A	COR1A_MOUSE	3.43597	4.2714	4.16216	5.1792	6.42019	6.04678	7.27258	7.53857	Enrich	2.77764	0.0116297	0.0249857	NotSig	1.67037	0.0297788	0.0930806	Enrich	3.08221	0.00129476	0.00316952	Enrich	2.33101	0.0058257	0.0294533	0.833368	0.0140137	0.0428253	5.7363	1.53953	2.13322e-13	0.744555	1.69264e-09
O89086	Rbm3	RNA-binding protein 3	RBM3_MOUSE	0.822004	0	0	0	5.92477	3.29989	4.072	1.53779	Enrich	4.80425	0.00692168	0.0162135	NotSig	inf	0.0636723	0.145812	Enrich	inf	5.08239e-05	0.000569659	NotSig	inf	0.5	0.580066	-1.93822	0.000272782	0.00469029	2.7046	-0.225548	1	-0.264168	0.904199
O89094;O89094-2	Casp14	Caspase-14;Isoform 2 of Caspase-14	CASPE_MOUSE	2.7987	4.63821	4.36872	6.17606	6.38234	4.32848	5.36999	5.18618	NotSig	1.80476	0.1143	0.165871	NotSig	1.05085	0.85177	0.879887	NotSig	0.412166	0.578136	0.606019	NotSig	-1.31071	0.246469	0.341629	-0.671734	0.315112	0.406387
O89112	Lancl1	Glutathione S-transferase LANCL1	LANC1_MOUSE	0	0	1.93874	4.07032	7.17595	6.06624	8.34099	7.3707	Enrich	inf	0.000379925	0.00145312	Enrich	inf	0.00051148	0.00487647	NotSig	2.62033	0.0450581	0.0655204	Enrich	3.34633	0.00651148	0.0308144	1.01196	0.0547054	0.1111	6.36133	0.607257	0.0030959	-0.576476	1.24647e-06
P00158	Mt-Cyb	Cytochrome b	CYB_MOUSE	6.08375	6.5228	5.68577	8.98866	5.81001	7.13294	8.31915	9.42159	NotSig	-2.08493	0.841867	0.870351	NotSig	-0.278161	0.651887	0.697233	NotSig	2.23438	0.241144	0.280439	NotSig	0.018925	0.810188	0.848208	4.56382	0.164749	0.248973
P00397	Mtco1	Cytochrome c oxidase subunit 1	COX1_MOUSE	5.86849	6.00343	5.23636	7.76498	5.00124	6.23963	7.87126	8.47995	NotSig	-1.92756	0.471186	0.526304	NotSig	-0.0200138	0.796872	0.830921	NotSig	2.38954	0.132476	0.164748	NotSig	0.562152	0.669799	0.730053	4.14565	0.0651629	0.12522
P00405	Mtco2	Cytochrome c oxidase subunit 2	COX2_MOUSE	7.13814	6.73363	6.51835	8.95478	9.95815	8.30731	9.12559	9.72284	Enrich	2.71293	0.00265359	0.00724664	Enrich	1.56859	0.00418369	0.0199437	Enrich	2.3999	0.019203	0.0317541	NotSig	0.509	0.469186	0.578965	-0.648149	0.179958	0.267487
P00416	mt-Co3	Cytochrome c oxidase subunit 3	COX3_MOUSE	3.13602	2.77581	4.00938	6.10571	4.27035	4.76253	6.30577	6.77015	NotSig	-0.642355	0.487321	0.541468	NotSig	0.0601996	0.317232	0.433909	NotSig	1.75207	0.131926	0.164277	NotSig	0.0745637	0.684021	0.742949	2.72457	0.0720911	0.13391
P00493	Hprt1	Hypoxanthine-guanine phosphoribosyltransferase	HPRT_MOUSE	0.92507	0	1.1914	0	7.16762	6.37483	7.8337	7.62222	Enrich	5.57567	0.00654155	0.0155348	Enrich	inf	0.000234193	0.00342281	Enrich	5.15878	0.0101278	0.0187221	NotSig	inf	0.022894	0.0582131	0.709878	0.0466008	0.0992368
P00848	Mtatp6	ATP synthase subunit a	ATP6_MOUSE	1.38417	1.66898	1.26072	4.60169	3.81257	4.53489	5.24803	6.13784	NotSig	0.712094	0.182431	0.245991	NotSig	0.115541	0.18473	0.288495	NotSig	2.89172	0.0427302	0.0625793	NotSig	2.15083	0.474012	0.580066	1.67282	0.190841	0.277841
P00920	Ca2	Carbonic anhydrase 2	CAH2_MOUSE	6.22267	6.5534	4.09814	5.32011	7.64962	7.20547	7.48172	6.32781	NotSig	1.35727	0.0272209	0.051413	NotSig	0.649658	0.0494125	0.137548	NotSig	2.47086	0.0890225	0.116305	Enrich	1.01195	0.00207911	0.0175848	-0.209755	0.619957	0.68584
P01027	C3	Complement C3	CO3_MOUSE	1.36266	0	0	0	0	1.447	0	0	NotSig	#NAME?	0.391002	0.443422	NotSig	inf	0.391002	0.454376	NotSig											0
P01786;P01787;P01788;P01789;P01790;P01791;P01792;P01793;P01794	Unknown	Ig heavy chain V region MOPC 47A;Ig heavy chain V regions TEPC 15/S107/HPCM1/HPCM2/HPCM3;Ig heavy chain V region H8;Ig heavy chain V region M603;Ig heavy chain V region M511;Ig heavy chain V region HPCM6;Ig heavy chain V region HPCG8;Ig heavy chain V region HPCG13;Ig heavy chain V region HPCG14	HVM17_MOUSE;HVM18_MOUSE;HVM19_MOUSE;HVM20_MOUSE;HVM21_MOUSE;HVM22_MOUSE;HVM23_MOUSE;HVM24_MOUSE;HVM25_MOUSE	0	0	0	0	1.15124	1.11671	0	0	NotSig	inf	0.391002	0.443422	NotSig	inf	0.391002	0.454376	NotSig								#NAME?	0.391002	0.469332
P01831	Thy1	Thy-1 membrane glycoprotein	THY1_MOUSE	1.13922	4.49629	3.66735	5.17192	7.29624	6.10856	5.1137	5.17651	Enrich	5.40745	0.00580139	0.0140439	NotSig	1.2785	0.0627322	0.145715	NotSig	0.695326	0.324371	0.369147	NotSig	-0.0489264	0.987275	0.990093	-2.77728	0.052165	0.107525	9.04374	1.48134	7.19787e-61	0.22484	0.00608103
P01867;P01867-2	Igh-3	Ig gamma-2B chain C region;Isoform 2 of Ig gamma-2B chain C region	IGG2B_MOUSE	0	5.89039	7.65597	3.58169	2.29749	11.4998	5.90095	2.32451	NotSig	inf	0.18171	0.245991	NotSig	1.2172	0.19963	0.296491	NotSig	-2.02234	0.0738393	0.0990393	NotSig	-0.810611	0.689726	0.746958	2.47825	0.0679871	0.128935
P01887	B2m	Beta-2-microglobulin	B2MG_MOUSE	5.03261	5.18767	4.17718	7.38098	5.55664	5.80138	1.99009	7.15068	NotSig	0.437069	0.446796	0.501301	NotSig	0.600261	0.0337002	0.101635	NotSig	-1.39156	0.154858	0.189219	NotSig	-0.289505	0.393222	0.500384	-2.74622	0.048683	0.102093	5.19325	-4.25388	2.36831e-31	-3.3508	0.000156909
P01899	H2-D1	H-2 class I histocompatibility antigen, D-B alpha chain	HA11_MOUSE	1.72496	2.80138	0.830253	6.55299	4.08395	4.18272	1.52296	6.16193	NotSig	2.98948	0.0561505	0.0963882	NotSig	0.844533	0.262592	0.369574	NotSig	0.0542201	0.509786	0.539696	NotSig	-0.434904	0.153379	0.22716	-3.48255	0.0352547	0.0807176	3.28832	-4.88673	5.91545e-21	-3.78019	5.15102e-06
P01901	H2-K1	H-2 class I histocompatibility antigen, K-B alpha chain	HA1B_MOUSE	0	0	0	6.52161	1.85198	0	0	7.13061	NotSig	inf	0.391002	0.443422	NotSig				NotSig				NotSig	0.59183	0.0237254	0.0589674	#NAME?	0.391002	0.469332	3.19878	-3.81368	4.64943e-17	-3.58734	1.53009e-09
P01942	Hba	Hemoglobin subunit alpha	HBA_MOUSE	7.3674	9.80518	7.70586	9.95135	7.45554	10.373	7.49935	9.70278	NotSig	-0.683153	0.923058	0.938067	NotSig	0.334553	0.566998	0.616856	NotSig	-0.440739	0.789298	0.806157	NotSig	-0.375621	0.549279	0.624865	0.0905739	0.922136	0.934733
P02088	Hbb-b1	Hemoglobin subunit beta-1	HBB1_MOUSE	6.43444	8.70267	6.75523	8.84014	6.00796	9.1444	5.90841	8.68086	NotSig	-1.06522	0.647412	0.694377	NotSig	0.378948	0.643079	0.690032	NotSig	-0.978225	0.184365	0.221038	NotSig	-0.336633	0.751499	0.798361	-0.130514	0.83463	0.867428
P02798	Mt2	Metallothionein-2	MT2_MOUSE	1.87497	0.584831	0.562498	3.21164	1.50671	2.35366	2.50742	3.80753	NotSig	-0.12518	0.75791	0.79491	NotSig	2.7607	0.151469	0.269775	NotSig	2.39049	0.0330575	0.050421	NotSig	0.577434	0.293767	0.397305	0.431989	0.343421	0.435331	5.09401	-4.62869	2.47287e-44	-4.23752	3.73102e-21
P02802	Mt1	Metallothionein-1	MT1_MOUSE	3.83157	2.96121	2.07347	4.59479	4.08034	4.27092	4.28525	5.09365	NotSig	0.347603	0.745291	0.783467	NotSig	0.818693	0.305549	0.421031	NotSig	1.94062	0.0634491	0.08714	NotSig	0.435462	0.238653	0.332599	0.000441044	0.759734	0.80774	6.5288	-4.16753	9.23781e-96	-4.28532	3.00544e-69
P03888	Mtnd1	NADH-ubiquinone oxidoreductase chain 1	NU1M_MOUSE	4.20343	5.03334	4.55401	8.31536	5.74421	6.90159	8.21339	9.62907	NotSig	-1.562	0.480615	0.535098	NotSig	-0.267633	0.422385	0.482208	NotSig	2.91375	0.13982	0.172981	NotSig	1.66511	0.623296	0.691704	3.93887	0.109429	0.180141
P03893	Mtnd2	NADH-ubiquinone oxidoreductase chain 2	NU2M_MOUSE	1.54267	1.87308	2.53785	5.92543	1.81345	5.21293	6.14027	8.04644	NotSig	-1.57274	0.890377	0.910914	NotSig	-0.149861	0.171856	0.288495	NotSig	2.22104	0.115439	0.146416	NotSig	2.86838	0.416857	0.524523	4.57625	0.0219568	0.0587274
P03899	Mtnd3	NADH-ubiquinone oxidoreductase chain 3	NU3M_MOUSE	1.52641	1.94943	1.70852	5.9855	3.34006	2.76732	6.70879	7.55165	NotSig	-0.0782729	0.378699	0.443422	NotSig	-1.28014	0.757054	0.79405	NotSig	2.5059	0.0537974	0.0766359	NotSig	1.92016	0.475949	0.580066	3.32101	0.0518766	0.107168
P03903	Mtnd4l	NADH-ubiquinone oxidoreductase chain 4L	NU4LM_MOUSE	0	0	0	1.06484	0	0	2.49375	3.14256	NotSig				NotSig				NotSig	inf	0.065387	0.089246	NotSig	2.52787	0.209842	0.297461	inf	0.065387	0.125291
P03911	Mtnd4	NADH-ubiquinone oxidoreductase chain 4	NU4M_MOUSE	2.87185	3.48095	5.0442	7.43906	5.15461	6.0362	7.54248	9.10442	NotSig	-0.699405	0.318521	0.39617	NotSig	-0.302471	0.332009	0.450125	NotSig	2.89135	0.13642	0.169139	NotSig	1.93432	0.560713	0.635038	3.64471	0.113067	0.184466
P03921	Mtnd5	NADH-ubiquinone oxidoreductase chain 5	NU5M_MOUSE	6.27616	6.94295	6.32452	8.91953	5.9422	7.26177	8.09856	9.49398	NotSig	-2.14329	0.811529	0.842146	NotSig	-0.402155	0.831096	0.860871	NotSig	2.62023	0.365058	0.410887	NotSig	0.321943	0.830474	0.86622	4.34377	0.223165	0.310799
P03930	Mtatp8	ATP synthase protein 8	ATP8_MOUSE	1.52845	2.88765	1.66306	4.4282	1.04575	3.26397	6.21132	6.8681	NotSig	-1.99153	0.804186	0.83611	NotSig	-0.541733	0.892732	0.916153	NotSig	1.92359	0.0660768	0.0900591	NotSig	1.40192	0.204616	0.291229	4.46013	0.00897952	0.0320936
P03995;P03995-2	Gfap	Glial fibrillary acidic protein;Isoform 2 of Glial fibrillary acidic protein	GFAP_MOUSE	6.4123	4.9481	7.62592	5.60094	5.91824	5.24393	4.61395	5.63727	NotSig	-1.86544	0.700801	0.744094	NotSig	0.517986	0.629467	0.677613	NotSig	-4.27196	0.105197	0.134857	NotSig	-0.583255	0.975962	0.980847	-1.20927	0.0997905	0.168001	2.5354	-5.49278	1.59474e-11	-0.230313	0.170076
P04247	Mb	Myoglobin	MYG_MOUSE	0	4.3292	3.25408	1.76653	0.969634	7.34348	2.46691	0.0221751	NotSig	inf	0.391002	0.443422	NotSig	1.17302	0.170933	0.288495	NotSig	-2.05363	0.621498	0.648392	NotSig	-8.50302	0.192545	0.276426	0.786796	0.237711	0.326007	0.45758			-1.12157	1
P04370-4	Mbp	Isoform 4 of Myelin basic protein	MBP_MOUSE	12.1535	12.8929	10.7612	9.61069	12.2378	12.7164	10.8899	10.145	NotSig	0.082387	0.869608	0.892988	NotSig	0.0530151	0.763173	0.799543	NotSig	0.0403617	0.809015	0.825707	NotSig	0.456031	0.173564	0.253317	-1.3905	0.0259404	0.065239	9.92254	-3.90875	5.71703e-133	0.110885	9.61897e-109
P04443;P04444	Hbb-bh0;Hbb-bh1	Hemoglobin subunit beta-H0;Hemoglobin subunit beta-H1	HBB0_MOUSE;HBBZ_MOUSE	0.721366	1.19936	1.37473	1.14694	1.59043	2.15874	1.09362	0	NotSig	1.66005	0.508855	0.561312	NotSig	1.29923	0.623558	0.672068	NotSig	-1.16346	0.878372	0.888906	NotSig	#NAME?	0.391002	0.49801	-0.0325273	0.748548	0.797606
P04627	Araf	Serine/threonine-protein kinase A-Raf	ARAF_MOUSE	0	0	0	0	6.88203	5.50647	5.91585	6.11832	Enrich	inf	3.35887e-05	0.000297006	Enrich	inf	0.000203593	0.00322356	Enrich	inf	0.000658456	0.00178724	Enrich	inf	0.0124954	0.0449163	-0.871163	0.0881304	0.15383	6.79855	0.311847	0.000449295	-0.727912	4.11953e-06
P04925	Prnp	Major prion protein	PRIO_MOUSE	2.00822	2.3833	2.34709	3.48649	5.47094	3.7747	3.44669	3.72764	Enrich	3.97722	0.0143877	0.0298613	NotSig	0.97205	0.19648	0.293616	NotSig	0.814087	0.258592	0.298792	NotSig	0.193662	0.403539	0.511181	-2.72989	0.0628227	0.121856	8.802	-0.966427	0.0041595	-0.699353	0.164352
P05063	Aldoc	Fructose-bisphosphate aldolase C	ALDOC_MOUSE	6.05221	5.96157	5.44791	6.20092	9.34414	7.89978	9.38586	8.42091	Enrich	3.25737	0.000476705	0.00174096	Enrich	1.93194	0.001855	0.0107565	Enrich	3.86966	0.000342915	0.0010717	Enrich	2.19238	0.000855643	0.0133755	0.013116	0.908398	0.925996	7.05966	-3.36979	1.2204e-28	-3.416	0.31054
P05064	Aldoa	Fructose-bisphosphate aldolase A	ALDOA_MOUSE	7.45063	7.35931	7.36747	7.69227	10.6057	9.97929	11.8836	11.2259	Enrich	3.07072	0.00106916	0.00336792	Enrich	2.59869	0.000331434	0.00402173	Enrich	4.52032	1.9837e-06	0.000366048	Enrich	3.5044	0.00317156	0.0210083	1.29642	0.00169206	0.0111545	9.47371	0.528879	1.6258e-22	-0.022481	0.137623
P05132;P05132-2	Prkaca	cAMP-dependent protein kinase catalytic subunit alpha;Isoform 2 of cAMP-dependent protein kinase catalytic subunit alpha	KAPCA_MOUSE	0	0	0	3.69589	6.08577	4.84913	6.76739	6.66495	Enrich	inf	4.94453e-05	0.000363568	Enrich	inf	0.000500093	0.00482032	Enrich	inf	0.000109498	0.000594983	Enrich	2.96554	0.00131436	0.0151013	0.717269	0.0707932	0.132349	8.45187	1.80923	3.16265e-53	1.90878	1.44703e-72
P05201	Got1	Aspartate aminotransferase, cytoplasmic	AATC_MOUSE	6.86	7.08253	6.37711	6.82741	8.05447	7.79201	8.94586	8.5266	NotSig	1.11092	0.0273694	0.051552	NotSig	0.691524	0.0817472	0.169088	Enrich	2.51428	0.00163872	0.00390488	Enrich	1.65595	0.00290337	0.0204056	0.937632	0.0267445	0.0670117	7.33221	1.14246	5.87302e-17	-0.751778	4.29816e-10
P05202	Got2	Aspartate aminotransferase, mitochondrial	AATM_MOUSE	8.05748	8.39843	7.79282	9.37069	8.73864	8.58891	9.01016	9.95588	NotSig	0.581258	0.157468	0.219482	NotSig	0.158363	0.58775	0.636829	NotSig	1.10538	0.0536832	0.0765112	NotSig	0.539089	0.0709188	0.117838	0.277332	0.323448	0.415472	7.15839	0.785431	1.15694e-12	0.441784	5.21938e-06
P05213	Tuba1b	Tubulin alpha-1B chain	TBA1B_MOUSE	8.78652	9.23415	8.45134	8.68566	14.3571	12.9172	13.354	12.9442	Enrich	5.51338	7.54393e-05	0.000457965	Enrich	3.75387	0.000330803	0.00402173	Enrich	4.93623	9.10433e-06	0.000569659	Enrich	4.21245	0.00222224	0.0177712	-0.95938	0.0172291	0.0496129	8.23602	0.187402	1.56968e-05	1.34007	9.50765e-52
P05214	Tuba3a	Tubulin alpha-3 chain	TBA3_MOUSE	7.66088	8.25829	7.47746	7.9938	12.4021	10.9041	11.2898	10.8994	Enrich	4.57704	0.00111962	0.00349485	Enrich	2.59508	0.000693679	0.00566008	Enrich	3.79686	2.68329e-05	0.000569659	Enrich	2.8844	0.00747154	0.0336511	-1.08501	0.00504975	0.022176	0.864865			10.8847	0.390612
P05555	Itgam	Integrin alpha-M	ITAM_MOUSE	3.73531	4.81829	2.23376	7.92288	4.27826	4.51607	3.6058	7.70645	NotSig	-0.299227	0.695683	0.739926	NotSig	-0.282669	0.479417	0.535369	NotSig	0.0572576	0.381554	0.422677	NotSig	-0.247256	0.294213	0.397612	-0.620714	0.177535	0.264499	1.68282	-3.01805	0.0466779	-4.85432	0.00227115
P06151	Ldha	L-lactate dehydrogenase A chain	LDHA_MOUSE	6.77756	7.38282	6.69167	7.84044	9.76709	8.83767	10.9864	10.821	NotSig	2.42577	0.027529	0.0517787	NotSig	1.31561	0.0312907	0.0970083	Enrich	3.76432	0.0102147	0.0188583	Enrich	2.94951	0.000269199	0.0113696	1.22406	0.000104958	0.00306816	7.35256	0.810767	2.08246e-11	-0.043986	0.247524
P06745	Gpi	Glucose-6-phosphate isomerase	G6PI_MOUSE	5.49641	5.75814	5.08182	6.12061	6.89513	6.55196	7.93924	7.94798	Enrich	1.35023	0.0107196	0.0234331	NotSig	0.796126	0.0761636	0.16079	Enrich	2.6492	0.010398	0.0190986	Enrich	1.80875	0.00182924	0.0163238	1.06686	0.00290463	0.0155186
P06795;P21447	Abcb1b;Abcb1a	ATP-dependent translocase ABCB1	MDR1B_MOUSE;MDR1A_MOUSE	0	0	0	0	0	0.635793	4.19658	0	NotSig				NotSig	inf	0.391002	0.454376	Enrich	inf	0.00091122	0.0023531					inf	0.00091122	0.00797915
P06801	Me1	NADP-dependent malic enzyme	MAOX_MOUSE	5.27831	4.97599	5.26088	5.37933	5.3947	5.35527	5.78922	6.04408	NotSig	0.0895835	0.541584	0.593842	NotSig	0.33957	0.199923	0.29676	NotSig	0.509261	0.069501	0.0940558	NotSig	0.405648	0.337521	0.446271	0.411423	0.0216476	0.058144	5.67371	-0.274109	0.146684	2.16017	2.081e-22
P06837	Gap43	Neuromodulin	NEUM_MOUSE	3.27019	2.20816	2.01225	4.42442	4.68277	5.26354	7.12964	7.66074	NotSig	0.676979	0.298518	0.37451	NotSig	1.7979	0.0983396	0.192482	Enrich	4.36144	0.0157147	0.0269811	Enrich	3.08683	0.00375519	0.0228977	2.64011	0.00810755	0.0299571	10.946	2.69843	2.14973e-231	0.956784	9.74336e-93
P06909	Cfh	Complement factor H	CFAH_MOUSE	2.70939	1.55696	2.03111	5.86722	1.18344	3.03969	3.66921	5.67883	NotSig	-1.72101	0.468656	0.523691	NotSig	1.61524	0.345736	0.454376	NotSig	0.467458	0.279841	0.32166	NotSig	-0.25675	0.513957	0.592358	1.04403	0.123664	0.197073	1.15378	-5.24764	0.000155474	-4.67499	0.000260255
P07091	S100a4	Protein S100-A4	S10A4_MOUSE	1.13955	3.11874	4.77238	3.00443	4.47281	6.15004	2.29907	1.57324	NotSig	3.37129	0.142502	0.200758	NotSig	1.23016	0.19861	0.295306	NotSig	-2.27004	0.0457065	0.0662617	NotSig	-1.62171	0.529074	0.607279	-3.34786	0.279337	0.370826	0	#NAME?	0.148767	#NAME?	0.135034
P07146	Prss2	Anionic trypsin-2	TRY2_MOUSE	10.3727	10.1648	8.92049	8.48133	10.2515	10.0737	8.54793	8.43875	NotSig	-0.109007	0.488935	0.542823	NotSig	-0.107636	0.748203	0.786959	NotSig	-0.239172	0.522069	0.551073	NotSig	-0.185069	0.92007	0.93956	-1.5237	0.0319393	0.0754273
P07214	Sparc	SPARC	SPRC_MOUSE	3.08422	3.73626	1.8607	8.32226	4.68938	5.17942	4.37545	7.98628	NotSig	0.959498	0.229362	0.294604	Enrich	1.5406	0.0124418	0.0475505	NotSig	1.4706	0.114001	0.14472	NotSig	-0.405638	0.410409	0.518266	-0.240866	0.494128	0.566339	6.65864	-4.70099	2.65352e-123	-2.32539	0.910549
P07356	Anxa2	Annexin A2	ANXA2_MOUSE	8.03778	6.84848	8.69647	7.61477	7.73426	7.61585	6.30858	7.46906	NotSig	-0.439719	0.586125	0.637658	NotSig	0.590049	0.317276	0.433909	Deplete	-2.34278	0.0276539	0.0432365	NotSig	-0.53912	0.837293	0.870426	-1.13104	0.1009	0.169253	1.85044	-5.25617	1.41546e-10	-3.4569	0.000365402
P07724	Alb	Serum albumin	ALBU_MOUSE	2.93421	6.119	5.61936	4.38395	5.3133	8.30572	3.96284	4.54989	NotSig	1.80593	0.0990409	0.145726	NotSig	1.12258	0.144102	0.259482	NotSig	-2.48109	0.155647	0.190022	NotSig	0.0843412	0.845988	0.877841	-1.41628	0.00208168	0.0125949	0			#NAME?	0.390612
P07758;P22599;Q00896;Q00898	Serpina1a;Serpina1b;Serpina1c;Serpina1e	Alpha-1-antitrypsin 1-1;Alpha-1-antitrypsin 1-2;Alpha-1-antitrypsin 1-3;Alpha-1-antitrypsin 1-5	A1AT1_MOUSE;A1AT2_MOUSE;A1AT3_MOUSE;A1AT5_MOUSE	0	1.5045	0	0	0.909	5.45329	0	0	NotSig	inf	0.391002	0.443422	NotSig	1.60322	0.0745593	0.158535	NotSig								#NAME?	0.391002	0.469332
P07901	Hsp90aa1	Heat shock protein HSP 90-alpha	HS90A_MOUSE	5.60405	5.59958	5.04369	5.33395	11.5146	8.91143	9.77689	9.79971	Enrich	5.76867	0.000868482	0.00284324	Enrich	3.52489	0.00287315	0.0147825	Enrich	4.79412	3.12813e-06	0.000407937	Enrich	4.44271	0.000721374	0.0131974	-1.70809	0.00155551	0.0106185	11.1748	0.310892	5.31257e-22	1.57011	2.96029e-185
P08003	Pdia4	Protein disulfide-isomerase A4	PDIA4_MOUSE	4.37667	4.65614	3.96074	8.09254	4.84187	4.80971	4.37093	7.62756	NotSig	0.362361	0.293158	0.368121	NotSig	0.220295	0.65891	0.703331	NotSig	0.524798	0.492863	0.523906	NotSig	-0.527897	0.151478	0.224936	-0.305262	0.371452	0.462756	5.58521	-1.36816	4.6538e-06	-1.182	0.000422936
P08071	Ltf	Lactotransferrin	TRFL_MOUSE	0	0	0.560823	2.30488	3.85217	2.83132	1.68117	2.6913	NotSig	inf	0.101704	0.149121	NotSig	inf	0.300965	0.416095	NotSig	2.34332	0.367679	0.41335	NotSig	-1.06961	0.801731	0.840293	-3.91746	0.310178	0.401828	0	#NAME?	0.406022
P08074	Cbr2	Carbonyl reductase [NADPH] 2	CBR2_MOUSE	1.00701	2.83463	2.01394	0	1.19956	5.0182	1.09939	0	NotSig	0.808643	0.906287	0.923755	NotSig	0.141233	0.310809	0.4266	NotSig	-1.54631	0.571871	0.600109					-1.03423	0.949068	0.957672	0.553833	-5.11292	0.0435598	-2.81077	0.636103
P08113	Hsp90b1	Endoplasmin	ENPL_MOUSE	7.90366	8.10683	7.5055	12.0844	7.87086	8.12389	6.72423	11.7574	NotSig	-0.251389	0.955793	0.96439	NotSig	0.0913108	0.976292	0.980717	NotSig	-0.855334	0.0778373	0.103483	NotSig	-0.396219	0.301325	0.405663	-1.15208	0.00271102	0.01503	9.50318	-0.830993	0.000162402	-0.615258	3.59711e-11
P08121	Col3a1	Collagen alpha-1(III) chain	CO3A1_MOUSE	0	0	0	1.74343	0	0	0	0.816677	NotSig				NotSig				NotSig				NotSig	-3.31202	0.562311	0.636255				1.27191	-3.18222	0.0290483	-1.50249	0.718853
P08122	Col4a2	Collagen alpha-2(IV) chain	CO4A2_MOUSE	1.71268	0	1.81197	2.90953	4.7587	1.97451	8.24142	8.43708	NotSig	1.99122	0.263189	0.333996	NotSig	inf	0.391002	0.454376	Enrich	6.17503	0.00339501	0.00742966	Enrich	4.98776	0.00927871	0.0381881	1.86885	0.145543	0.225362	3.461	-2.78707	7.78441e-05	-0.827476	0.746961
P08207	S100a10	Protein S100-A10	S10AA_MOUSE	1.33062	0	1.89684	0	0	0	0	0	NotSig	#NAME?	0.391002	0.443422	NotSig				NotSig	#NAME?	0.391002	0.422677								5.72767	0.649812	1.03986e-05	1.46646	2.93856e-10
P08226	Apoe	Apolipoprotein E	APOE_MOUSE	0	0	0	2.2857	1.21038	3.12452	2.61391	3.84241	NotSig	inf	0.208068	0.270027	Enrich	inf	0.00940201	0.0373832	NotSig	inf	0.0614845	0.0850116	NotSig	0.291685	0.340079	0.449019	1.67468	0.277506	0.369073	6.80413	-5.1002	2.45769e-138	-5.60895	5.8818e-53
P08228	Sod1	Superoxide dismutase [Cu-Zn]	SODC_MOUSE	1.34291	4.58597	5.91292	4.42077	5.51401	7.674	6.52884	5.94606	NotSig	2.2997	0.0479661	0.0840171	NotSig	1.64609	0.156713	0.276797	NotSig	0.213551	0.470018	0.501108	NotSig	1.51046	0.0296985	0.0662559	0.958235	0.0891846	0.154825	7.75479	-0.481284	0.82187	-1.0881	1.59022e-16
P08249	Mdh2	Malate dehydrogenase, mitochondrial	MDHM_MOUSE	8.04066	8.21571	7.84501	9.49238	8.94657	8.72776	9.54739	10.4523	NotSig	0.764623	0.120693	0.173863	NotSig	0.518773	0.243643	0.347688	Enrich	1.58895	0.0120278	0.0215269	NotSig	0.904435	0.0242786	0.0594454	0.594679	0.0219967	0.0587797	7.55629	-0.05596	0.0242687	-1.09436	1.85943e-19
P08414	Camk4	Calcium/calmodulin-dependent protein kinase type IV	KCC4_MOUSE	2.74637	4.1002	4.5844	3.91026	6.09445	5.17618	6.5686	5.34581	NotSig	2.88357	0.0372598	0.0672338	NotSig	1.13246	0.0249154	0.082637	Enrich	2.03851	0.000917199	0.00236641	Enrich	1.45181	0.010654	0.0413081	0.521657	0.149177	0.229637
P08551	Nefl	Neurofilament light polypeptide	NFL_MOUSE	5.49173	5.83283	3.65627	2.48084	10.2305	7.95336	6.97309	4.16447	Enrich	4.80071	0.000518563	0.00185683	Enrich	2.3128	0.00938457	0.0373697	Enrich	3.47171	0.000837562	0.00218451	NotSig	1.14911	0.171602	0.251122	-3.37526	0.00289966	0.0155186	7.48038	-0.740072	0.580241	-1.38057	2.22795e-32
P08553	Nefm	Neurofilament medium polypeptide	NFM_MOUSE	7.14273	7.42616	5.15361	4.08873	10.0549	8.1364	6.33173	4.53572	Enrich	2.96725	0.00332333	0.0087289	NotSig	0.803985	0.127273	0.235264	NotSig	1.18966	0.0817188	0.107695	NotSig	0.436403	0.132894	0.199981	-3.80137	0.000980051	0.00839642	7.32139	-1.30428	0.534676	-1.54905	8.26631e-22
P08752	Gnai2	Guanine nucleotide-binding protein G(i) subunit alpha-2	GNAI2_MOUSE	5.76256	6.17139	5.83455	7.2314	8.87117	8.08168	8.92185	8.91359	Enrich	3.07887	0.000700254	0.00238034	Enrich	1.92366	0.00221609	0.0123065	Enrich	3.0627	0.000204909	0.000752733	Enrich	1.65981	0.00175129	0.0160355	0.0652482	0.742734	0.791994	8.1884	-1.34743	7.54798e-12	0.226833	3.81495e-29
P09055;P09055-2	Itgb1	Integrin beta-1;Isoform 2 of Integrin beta-1	ITB1_MOUSE	0	0	0	3.45192	2.48047	0	0.644594	4.2925	NotSig	inf	0.187257	0.248053	NotSig				NotSig	inf	0.391002	0.422677	NotSig	0.0164452	0.525981	0.604223	-3.74997	0.311524	0.402838	5.48271	-2.54458	5.93905e-17	-1.37953	0.890025
P09103	P4hb	Protein disulfide-isomerase	PDIA1_MOUSE	5.37063	5.57008	5.20182	8.9069	5.75917	5.93901	4.7034	8.68159	NotSig	0.289602	0.381844	0.443422	NotSig	0.282351	0.41323	0.473994	NotSig	-0.472377	0.102967	0.132294	NotSig	-0.292047	0.447447	0.556045	-1.05088	0.00963991	0.0338978	5.36521	-1.80642	1.67283e-09	-1.20114	1.64539e-05
P09405	Ncl	Nucleolin	NUCL_MOUSE	5.09754	5.1889	4.64319	1.15077	5.54953	5.79903	4.58746	0	NotSig	0.359413	0.32478	0.401956	NotSig	0.543729	0.200688	0.297565	NotSig	0.0235356	0.882434	0.892388	NotSig	#NAME?	0.391002	0.49801	-0.917425	0.0521128	0.107494	9.44399	-0.563338	0.831997	-0.489028	1.07625e-05
P09411	Pgk1	Phosphoglycerate kinase 1	PGK1_MOUSE	5.97738	6.25775	5.98529	5.81793	7.27432	7.14325	8.17745	8.029	Enrich	1.25331	0.0158129	0.0324518	Enrich	0.875105	0.00639147	0.0277346	Enrich	2.21697	0.000254575	0.00086989	Enrich	2.16603	0.00170431	0.0158636	0.92269	0.0162783	0.0475372	2.40373	-2.14614	0.019387	-1.46265	0.0274475
P09528	Fth1	Ferritin heavy chain	FRIH_MOUSE	4.73289	4.24319	2.75871	4.3691	6.84942	5.45215	7.37652	6.67952	Enrich	2.22103	0.00974421	0.0216415	NotSig	1.17776	0.0684371	0.150573	Enrich	4.24133	0.0135406	0.0238331	Enrich	2.31569	0.000923536	0.0136001	0.400398	0.332485	0.424069
P09541	Myl4	Myosin light chain 4	MYL4_MOUSE	0.641223	2.72868	4.66614	1.40347	0.406415	6.64459	3.50966	2.87728	NotSig	-1.23719	0.769392	0.804498	NotSig	1.489	0.10775	0.207092	NotSig	-1.31718	0.202418	0.239183	NotSig	-0.90975	0.371521	0.48439	4.56587	0.00420609	0.0197604	1.26187	-2.16078	0.509239	-1.66998	0.351697
P09542	Myl3	Myosin light chain 3	MYL3_MOUSE	4.08731	6.88954	9.17254	6.0093	4.61905	11.1431	7.57333	5.32155	NotSig	0.600526	0.149035	0.208785	NotSig	1.8531	0.0779064	0.162925	NotSig	-1.5683	0.113802	0.144532	NotSig	-0.728242	0.0194308	0.0540257	3.25038	0.0138926	0.0425901	0.329382	9.62964	0.406022	-1.06997	1
P09581	Csf1r	Macrophage colony-stimulating factor 1 receptor	CSF1R_MOUSE	0	0	0	5.73889	0.673184	0.459565	1.0808	5.59968	NotSig	inf	0.391002	0.443422	NotSig	inf	0.391002	0.454376	NotSig	inf	0.188073	0.224732	NotSig	-0.188094	0.687504	0.745304	0.388118	0.675409	0.733721	2.8301	-3.35673	0.132235	-4.82278	1.33346e-05
P09671	Sod2	Superoxide dismutase [Mn], mitochondrial	SODM_MOUSE	6.1134	6.55401	5.97964	7.18523	6.88791	7.11566	6.84126	7.91444	NotSig	0.751581	0.140992	0.198835	NotSig	0.477317	0.173607	0.288495	NotSig	0.786561	0.0895124	0.116713	NotSig	0.673224	0.0585875	0.100869	-0.104392	0.896017	0.91628	5.91403	-0.631896	0.421662	-1.13077	1.4074e-09
P09813	Apoa2	Apolipoprotein A-II	APOA2_MOUSE	0	1.63797	2.26707	0	0	5.45306	1.53807	2.13589	NotSig				NotSig	1.29818	0.0977201	0.191693	NotSig	-1.58168	0.663442	0.689894	NotSig	inf	0.5	0.580066	inf	0.181767	0.269392	1.40987	0.492736	0.803609	5.8623	0.0383345
P0C0S6;Q3THW5	H2az1;H2az2	Histone H2A.Z;Histone H2A.V	H2AZ_MOUSE;H2AV_MOUSE	1.70488	3.97903	2.11802	3.25773	1.69943	5.00706	2.95779	3.53799	NotSig	-0.0569906	0.997041	0.997404	NotSig	1.02956	0.139686	0.2538	NotSig	0.384051	0.618403	0.645398	NotSig	-0.585463	0.825988	0.863142	1.25338	0.411386	0.487769
P0C7L0;P0C7L0-2	Wipf3	WAS/WASL-interacting protein family member 3;Isoform 2 of WAS/WASL-interacting protein family member 3	WIPF3_MOUSE	0	0	0.984944	0	3.5981	2.85067	6.90324	6.26874	Enrich	inf	0.00126754	0.00388166	NotSig	inf	0.0892622	0.180383	Enrich	5.07526	0.00824151	0.0157948	NotSig	inf	0.0195657	0.0541329	3.34307	0.00031449	0.00506464	6.05112	2.95622	2.83992e-17	-1.30192	3.64031e-23
P0CG49;P0CG50;P62983;P62984	Ubb;Ubc;Rps27a;Uba52	Polyubiquitin-B;Polyubiquitin-C;Ubiquitin-40S ribosomal protein S27a;Ubiquitin-60S ribosomal protein L40	UBB_MOUSE;UBC_MOUSE;RS27A_MOUSE;RL40_MOUSE	9.20471	9.08186	9.52396	9.36126	10.4403	10.4044	11.0877	10.291	Enrich	1.25804	0.00197296	0.0056517	NotSig	1.23136	0.0334435	0.101206	Enrich	1.51334	0.00971174	0.01814	NotSig	0.638909	0.191863	0.275588	0.674113	0.0758451	0.138746
P0DN34	Ndufb1	NADH dehydrogenase [ubiquinone] 1 beta subcomplex subunit 1	NDUB1_MOUSE	3.00399	1.0374	0.941891	4.70845	5.65527	4.90917	5.67019	5.48405	NotSig	1.90114	0.0900252	0.133605	NotSig	2.91834	0.0277355	0.0889945	Enrich	4.05244	0.0121348	0.0216517	NotSig	0.789175	0.140386	0.210242	0.0739685	0.959276	0.965908
P0DN89;P0DN90;P0DN91	Tmem254a;Tmem254b;Tmem254c	Transmembrane protein 254;Transmembrane protein 254b;Transmembrane protein 254c	T254A_MOUSE;T254B_MOUSE;T254C_MOUSE	0.807765	0	0	0.819846	0	0	2.12406	1.74428	NotSig	#NAME?	0.391002	0.443422	NotSig				NotSig	inf	0.202791	0.239328	NotSig	1.23136	0.693237	0.749784	inf	0.202791	0.290533
P0DP26;P0DP27;P0DP28	Calm1;Calm2;Calm3	Calmodulin-1;Calmodulin-2;Calmodulin-3	CALM1_MOUSE;CALM2_MOUSE;CALM3_MOUSE	6.21814	6.57832	7.37658	6.42086	10.3423	8.91935	9.02681	9.36498	Enrich	4.06785	0.000983713	0.00316717	Enrich	2.27798	0.00197465	0.0111995	Enrich	1.57862	0.0134206	0.0236773	Enrich	2.84671	0.00496536	0.0270496	-1.41645	0.043902	0.0950887
P10107	Anxa1	Annexin A1	ANXA1_MOUSE	2.80745	2.3642	2.29992	2.98798	6.34525	5.21892	6.94372	6.19994	NotSig	0.651695	0.149013	0.208785	NotSig	1.64266	0.137891	0.251055	NotSig	3.26383	0.0404078	0.0596041	NotSig	1.26962	0.161417	0.237313	0.510978	0.204524	0.292149	4.99746	3.23678	9.52346e-08	2.4784	8.75246e-14
P10126	Eef1a1	Elongation factor 1-alpha 1	EF1A1_MOUSE	8.88195	8.80228	8.96806	8.32711	11.0594	9.83137	10.1505	9.56171	Enrich	1.97043	0.015476	0.0317842	NotSig	0.98104	0.0192305	0.0673067	Enrich	1.12648	0.0171296	0.0289428	NotSig	0.983061	0.0803644	0.130129	-0.882893	0.0117013	0.0381777	6.609	-2.64458	2.18884e-45	-1.00248	3.23654e-05
P10518	Alad	Delta-aminolevulinic acid dehydratase	HEM2_MOUSE	0	0	4.0273	1.34564	2.66459	0	1.93462	2.07396	NotSig	inf	0.183705	0.245991	NotSig				NotSig	-2.21293	0.282471	0.324293	NotSig	-0.283421	0.797264	0.836547	-1.56682	0.716957	0.771042	3.61641	-1.01241	0.148767	-0.988333	0.00193354
P10605	Ctsb	Cathepsin B	CATB_MOUSE	2.13202	1.44331	2.48674	6.81814	3.28245	4.26785	3.79345	6.76632	NotSig	0.359211	0.524686	0.576693	NotSig	2.88611	0.0469622	0.13219	NotSig	-0.177827	0.438259	0.469516	NotSig	-0.111215	0.866525	0.895114	-0.0743891	0.681559	0.739569	8.711	-0.235145	0.115266	-0.533448	0.213842
P10630;P10630-2	Eif4a2	Eukaryotic initiation factor 4A-II;Isoform 2 of Eukaryotic initiation factor 4A-II	IF4A2_MOUSE	0	0	0	1.41605	8.96627	6.47671	6.11045	5.61092	Enrich	inf	1.55323e-05	0.000201704	Enrich	inf	0.0007593	0.00597555	Enrich	inf	0.000178251	0.000697184	Enrich	3.9942	0.0128183	0.0454953	-2.8415	0.000236847	0.00440981	6.52701	-0.004669	0.234431	-0.699124	7.0884e-07
P10637	Mapt	Microtubule-associated protein tau	TAU_MOUSE	5.90493	6.38703	5.35781	6.56714	10.5978	10.0979	11.6509	10.919	Enrich	4.64127	8.03573e-05	0.000475232	Enrich	3.67377	0.00016555	0.00311541	Enrich	6.23217	6.65224e-05	0.000569659	Enrich	4.28049	0.000290483	0.0113696	1.09148	0.0336162	0.0780781	9.93033	0.357976	2.02328e-27	2.08003	1.27966e-167
P10637-2	Mapt	Isoform Tau-A of Microtubule-associated protein tau	TAU_MOUSE	0	0	0	0	7.07923	6.71517	8.34491	7.60135	Enrich	inf	3.34684e-05	0.000296915	Enrich	inf	5.25579e-05	0.00270019	Enrich	inf	0.000431172	0.00127267	NotSig	inf	0.0236461	0.0589674	1.43507	0.0744859	0.137005	9.93033	0.357976	2.02328e-27	2.08003	1.27966e-167
P10637-3;P10637-4	Mapt	Isoform Tau-B of Microtubule-associated protein tau;Isoform Tau-C of Microtubule-associated protein tau	TAU_MOUSE	3.90277	5.59805	4.85414	5.66848	8.60238	8.11193	9.58237	8.8082	NotSig	3.87725	0.0341713	0.0622738	Enrich	2.4989	0.000434356	0.00456675	Enrich	4.77072	7.89187e-06	0.000566045	Enrich	3.16605	0.0136626	0.0465764	0.913254	0.062397	0.121274	9.93033	0.357976	2.02328e-27	2.08003	1.27966e-167
P10639	Txn	Thioredoxin	THIO_MOUSE	7.84087	6.77203	8.20823	7.57788	7.55507	8.20825	8.3147	8.07233	NotSig	-0.279133	0.364916	0.443422	NotSig	1.3769	0.0328975	0.100583	NotSig	-0.0581837	0.845846	0.858717	NotSig	-0.219478	0.601769	0.673058	0.762367	0.050412	0.105034
P10649	Gstm1	Glutathione S-transferase Mu 1	GSTM1_MOUSE	5.9636	6.06355	5.13092	6.4007	7.54202	7.27832	7.669	7.43782	Enrich	1.50696	0.0181368	0.0365125	Enrich	1.24387	0.00119048	0.00805771	Enrich	2.42201	0.00604688	0.0121829	Enrich	1.02788	0.00290367	0.0204056	0.0842743	0.626392	0.691373	4.14471	-4.49334	6.42602e-35	-3.88199	7.99798e-18
P10751	Zfp11	Zinc finger protein 11	ZFP11_MOUSE	5.43601	4.78436	6.71167	8.67675	10.7127	8.88902	8.07545	11.337	NotSig	3.83149	0.0628314	0.098828	NotSig	2.86638	0.0872811	0.176957	NotSig	3.48525	0.650921	0.678349	Enrich	2.62383	0.000593596	0.0130047	-0.317147	0.40067	0.477963	2.1106	-0.634649	0.333645	-1.46076	0.0440179
P10852;P10852-2	Slc3a2	4F2 cell-surface antigen heavy chain;Isoform 2 of 4F2 cell-surface antigen heavy chain	4F2_MOUSE	4.47318	4.76572	2.05903	6.00775	6.26348	5.65516	7.71042	7.7371	Enrich	1.72918	0.0109513	0.0237885	NotSig	0.97482	0.10704	0.205875	Enrich	4.64598	0.0173071	0.0292083	NotSig	1.74656	0.0420487	0.0800805	1.47639	0.000908098	0.00797915	5.33615	-2.21443	1.14174e-09	-1.95787	0.000410454
P10853;P10854;Q64475;Q64478;Q64525;Q6ZWY9;Q8CGP1;Q8CGP2;Q8CGP2-2	H2bc7;H2bc14;H2bc3;H2bc9;Hist2h2bb;H2bc4;H2bc12;Hist1h2bp;Hist1h2bp	Histone H2B type 1-F/J/L;Histone H2B type 1-M;Histone H2B type 1-B;Histone H2B type 1-H;Histone H2B type 2-B;Histone H2B type 1-C/E/G;Histone H2B type 1-K;Histone H2B type 1-P;Isoform 2 of Histone H2B type 1-P	H2B1F_MOUSE;H2B1M_MOUSE;H2B1B_MOUSE;H2B1H_MOUSE;H2B2B_MOUSE;H2B1C_MOUSE;H2B1K_MOUSE;H2B1P_MOUSE;H2B1P_MOUSE	8.79241	9.34248	8.75238	10.0375	8.75023	10.3644	8.11406	9.33918	NotSig	-0.108271	0.957371	0.965446	NotSig	0.829355	0.190014	0.28934	NotSig	-0.730812	0.256634	0.296768	NotSig	-0.735369	0.141358	0.211586	-0.793214	0.293407	0.385264
P10922	H1-0	Histone H1.0	H10_MOUSE	7.62954	8.17526	6.30419	6.83139	8.48117	8.08648	6.18216	6.7597	NotSig	0.903908	0.0999235	0.146789	NotSig	-0.219066	0.867675	0.894222	NotSig	0.0461566	0.825072	0.840302	NotSig	-0.107264	0.72447	0.774685	-2.23339	0.00980486	0.0342696
P11087;P11087-2	Col1a1	Collagen alpha-1(I) chain;Isoform 2 of Collagen alpha-1(I) chain	CO1A1_MOUSE	5.59872	5.96785	6.7432	5.90594	5.72125	8.46653	4.90451	4.65581	NotSig	0.291255	0.861561	0.886712	NotSig	1.87301	0.0570581	0.145715	NotSig	-2.14942	0.0417633	0.0613512	NotSig	-2.86967	0.370862	0.483755	-1.08788	0.247649	0.33711	0.457585	#NAME?	0.00735587	-2.58823	0.492918
P11247	Mpo	Myeloperoxidase	PERM_MOUSE	9.64062	10.5165	9.65149	8.68104	10.4148	9.87456	8.65347	8.81048	NotSig	0.774169	0.306931	0.383142	NotSig	-0.450572	0.265586	0.372649	NotSig	-1.15656	0.129671	0.161962	NotSig	-0.456784	0.868852	0.896601	-1.88733	0.0290341	0.0703195	0	#NAME?	0.406022
P11404	Fabp3	Fatty acid-binding protein, heart	FABPH_MOUSE	0	4.36221	4.68897	2.62364	0.943759	7.11293	4.98223	3.77267	NotSig	inf	0.391002	0.443422	NotSig	1.27604	0.186925	0.288676	NotSig	0.0173056	0.677401	0.702373	NotSig	0.644444	0.291727	0.395011	3.34661	0.0195294	0.0545016	7.13876	2.52224	3.13285e-26	1.7662	1.89305e-29
P11438	Lamp1	Lysosome-associated membrane glycoprotein 1	LAMP1_MOUSE	4.05666	2.68401	4.33744	4.14883	6.08143	5.54395	4.51459	4.94963	NotSig	1.12232	0.231783	0.297019	NotSig	1.3129	0.16334	0.284349	NotSig	-1.15967	0.916083	0.923162	NotSig	-0.606009	0.633905	0.701723	-1.55667	0.00380127	0.0185825	7.26458	-2.75979	6.07339e-66	-1.31707	0.0192053
P11499	Hsp90ab1	Heat shock protein HSP 90-beta	HS90B_MOUSE	7.20638	7.24075	6.82108	10.4003	12.8265	10.4109	10.7862	11.3407	Enrich	5.20768	0.00403106	0.0102453	Enrich	3.31585	0.00251431	0.0133229	Enrich	3.92834	7.03785e-05	0.000569659	NotSig	0.891167	0.038754	0.0761801	-1.99756	0.00133294	0.00999359	12.5841	0.604922	5.39343e-62	0.670659	5.24565e-101
P11627	L1cam	Neural cell adhesion molecule L1	L1CAM_MOUSE	2.63603	2.77224	1.78265	4.52004	7.122	5.53713	7.20421	6.60711	Enrich	4.74934	0.0117872	0.0252846	NotSig	2.40141	0.0541218	0.145715	Enrich	4.74976	0.0113203	0.0204908	Enrich	2.01735	0.00564392	0.0288981	-0.602646	0.9294	0.941436	8.12099	2.72198	4.66029e-52	2.20245	5.51509e-64
P11798	Camk2a	Calcium/calmodulin-dependent protein kinase type II subunit alpha	KCC2A_MOUSE	5.80407	6.25389	6.59526	7.09273	7.03231	6.50089	8.33649	8.23774	Enrich	1.21171	0.0037506	0.0096665	NotSig	0.287451	0.664501	0.708162	Enrich	1.61418	0.0218838	0.0353836	Enrich	1.12217	0.00532062	0.0279035	1.31642	0.000171059	0.00376488	5.47715	0.058332	0.023654	-2.38676	1.48161e-56
P11835	Itgb2	Integrin beta-2	ITB2_MOUSE	0	0	0.409955	4.71471	1.50792	1.3671	1.79585	4.54762	NotSig	inf	0.187999	0.248557	NotSig	inf	0.184491	0.288495	NotSig	3.40344	0.282669	0.324391	NotSig	-0.245324	0.555005	0.629334	0.588755	0.839981	0.871604	0	#NAME?	0.406022	#NAME?	0.0105458
P11881;P11881-2;P11881-3;P11881-4;P11881-5;P11881-6;P11881-7;P11881-8	Itpr1	Inositol 1,4,5-trisphosphate receptor type 1;Isoform 2 of Inositol 1,4,5-trisphosphate receptor type 1;Isoform 3 of Inositol 1,4,5-trisphosphate receptor type 1;Isoform 4 of Inositol 1,4,5-trisphosphate receptor type 1;Isoform 5 of Inositol 1,4,5-trisphosphate receptor type 1;Isoform 6 of Inositol 1,4,5-trisphosphate receptor type 1;Isoform 7 of Inositol 1,4,5-trisphosphate receptor type 1;Isofor…	ITPR1_MOUSE	0	0	2.20817	5.28805	4.91043	3.78979	5.81589	5.92641	Enrich	inf	0.00609092	0.0146033	NotSig	inf	0.0734776	0.156862	NotSig	2.4813	0.0644914	0.0883179	NotSig	0.595694	0.0683901	0.114636	0.527021	0.294342	0.386141	5.9909	0.801439	3.11926e-08	-2.07305	4.18461e-52
P11983	Tcp1	T-complex protein 1 subunit alpha	TCPA_MOUSE	3.92198	2.42855	3.11442	3.63479	8.05407	6.14689	7.53843	7.88514	Enrich	3.93839	0.00465942	0.0115332	NotSig	1.73341	0.0907798	0.18252	Enrich	3.86253	0.0230548	0.0369521	Enrich	4.31961	0.000873923	0.0133755	-0.502718	0.045503	0.0976897	6.23976	-0.424625	0.779838	-0.889259	6.94771e-09
P12023-2	App	Isoform APP695 of Amyloid-beta A4 protein	A4_MOUSE	0.959304	0	0.530524	5.71144	6.11663	4.92756	5.15013	6.10704	Enrich	4.46763	0.00917783	0.0206201	Enrich	inf	0.00269059	0.0140333	Enrich	5.40208	0.00147459	0.00355513	NotSig	0.36318	0.135133	0.202807	-1.05256	0.0414588	0.0908952	10.2442	-1.15793	1.13669e-19	-0.740769	1.01056e-38
P12265	Gusb	Beta-glucuronidase	BGLR_MOUSE	0	0	1.46692	2.81925	0	0.886985	0.887382	0.897065	NotSig				NotSig	inf	0.391002	0.454376	NotSig	-2.42202	0.749239	0.769627	NotSig	-2.36147	0.261268	0.359483	inf	0.391002	0.469332	5.33461	1.0052	0.00111399	0.871305	7.5616e-10
P12367	Prkar2a	cAMP-dependent protein kinase type II-alpha regulatory subunit	KAP2_MOUSE	2.27766	3.8781	1.88884	3.13425	5.6016	4.87899	5.63226	6.01315	NotSig	2.08379	0.0853937	0.127626	NotSig	0.681512	0.205553	0.302753	NotSig	2.85417	0.0425729	0.0624127	NotSig	1.95133	0.0859777	0.137554	0.0386818	0.828084	0.863906	8.06311	1.14854	8.15569e-23	2.36767	8.32635e-82
P12382	Pfkl	ATP-dependent 6-phosphofructokinase, liver type	PFKAL_MOUSE	3.3937	0.940294	3.52016	3.64796	5.84681	4.6482	6.15548	6.85509	NotSig	0.925536	0.169384	0.234308	NotSig	3.01358	0.0247684	0.0822977	Enrich	2.76169	2.87171e-05	0.000569659	Enrich	3.28706	0.00294939	0.0205216	0.316802	0.192527	0.279566	5.97966	0.783121	3.93385e-05	0.589901	0.0354561
P12388	Serpinb2	Plasminogen activator inhibitor 2, macrophage	PAI2_MOUSE	2.54684	1.27371	5.14791	3.24384	3.16662	1.96897	1.7207	4.18372	NotSig	-0.296251	0.745668	0.783564	NotSig	-0.204727	0.698274	0.741777	NotSig	-2.78882	0.0381341	0.0568051	NotSig	0.108971	0.476248	0.580066	-1.35234	0.364198	0.457064	0	#NAME?	0.406022
P12657	Chrm1	Muscarinic acetylcholine receptor M1	ACM1_MOUSE	0	0	0	0	0	0	3.89752	2.1158	NotSig				NotSig				NotSig	inf	0.061123	0.0847159	NotSig	inf	0.5	0.580066	inf	0.061123	0.119844	1.10217	-1.7934	0.372671	-6.26315	4.99027e-56
P12658	Calb1	Calbindin	CALB1_MOUSE	0	0	1.92992	0	6.73458	6.16894	6.82406	6.71873	Enrich	inf	4.49602e-05	0.000346359	Enrich	inf	0.000627889	0.00533605	Enrich	4.21174	0.0162234	0.0277053	NotSig	inf	0.0693894	0.116103	0.228309	0.854245	0.882608	7.84677	3.72296	5.15152e-40	-0.593779	9.00277e-17
P12787	Cox5a	Cytochrome c oxidase subunit 5A, mitochondrial	COX5A_MOUSE	4.52742	7.06916	6.67752	6.65143	6.1105	7.97606	6.12761	7.02967	NotSig	0.535371	0.384197	0.443422	NotSig	0.626952	0.31078	0.4266	NotSig	-0.590106	0.0613745	0.0849289	NotSig	0.307249	0.261839	0.360022	-0.131919	0.969814	0.974867	7.30111	-0.376431	1	-1.59632	7.75238e-41
P12815	Pdcd6	Programmed cell death protein 6	PDCD6_MOUSE	0.868577	0	1.88861	1.04851	6.25024	5.68854	8.29544	6.80908	Enrich	4.94665	0.00639924	0.0152627	Enrich	inf	0.000332624	0.00402173	Enrich	5.23963	0.0105824	0.0193752	Enrich	4.68984	0.0111322	0.0421504	2.06897	0.00104355	0.0087039	5.13255	-1.34799	9.45636e-05	-2.10583	2.48225e-25
P12849	Prkar1b	cAMP-dependent protein kinase type I-beta regulatory subunit	KAP1_MOUSE	0	0	0	0	6.5344	4.48969	5.2919	5.19918	Enrich	inf	1.84481e-06	0.000126409	Enrich	inf	0.000427737	0.00456675	Enrich	inf	0.000241066	0.000833276	Enrich	inf	0.0155581	0.0494166	-1.20586	0.0136365	0.0421173	9.20688	2.61025	8.88484e-104	2.47496	1.20357e-143
P12960	Cntn1	Contactin-1	CNTN1_MOUSE	4.46002	4.83217	5.16677	5.64743	8.48438	6.01087	6.35546	6.51698	Enrich	4.7894	0.0181687	0.0365501	NotSig	1.21541	0.086587	0.176222	NotSig	0.712537	0.162345	0.197527	NotSig	0.82096	0.0363324	0.0733169	-2.98423	0.113076	0.184466	8.70903	0.61695	1.9724e-33	0.595159	4.74486e-19
P12970	Rpl7a	60S ribosomal protein L7a	RL7A_MOUSE	8.80781	8.88965	8.05607	7.8319	8.83243	8.71862	6.7768	7.23919	NotSig	-0.118739	0.955829	0.96439	NotSig	-0.0973063	0.757333	0.79405	NotSig	-1.22933	0.0472942	0.0682188	NotSig	-0.635041	0.356771	0.4682	-1.91006	0.0101486	0.0350478	2.0394	-1.15062	0.175383	-1.09879	0.458913
P13020;P13020-2	Gsn	Gelsolin;Isoform 2 of Gelsolin	GELS_MOUSE	2.77269	1.93592	4.13412	3.33497	4.8244	3.86698	3.79645	3.82223	NotSig	1.38434	0.146063	0.205249	NotSig	2.42942	0.335186	0.453507	NotSig	-0.667757	0.640399	0.667625	NotSig	-0.563013	0.729726	0.779354	-1.13926	0.0347291	0.07983	4.34795	-4.26805	2.7727e-54	-2.1303	0.0049663
P13595	Ncam1	Neural cell adhesion molecule 1	NCAM1_MOUSE	4.3677	4.7832	3.99691	5.57608	7.64606	5.41476	5.63806	6.13223	Enrich	3.57584	0.0201252	0.0397019	NotSig	0.772378	0.215646	0.313982	Enrich	1.72916	0.00428414	0.00906431	NotSig	0.489313	0.133791	0.201116	-2.60835	0.0790791	0.141872	10.6157	1.27504	4.06602e-117	2.4232	1.13882e-256
P13707	Gpd1	Glycerol-3-phosphate dehydrogenase [NAD(+)], cytoplasmic	GPDA_MOUSE	5.59595	3.66306	3.45037	4.07683	6.21382	6.06689	6.84853	5.89883	NotSig	0.584235	0.127815	0.183068	NotSig	1.40025	0.159322	0.280599	NotSig	2.67675	0.06085	0.0844191	NotSig	1.72315	0.0175352	0.0521293	0.615232	0.0361016	0.0821252	2.02936	-4.89966	2.6819e-15	-3.38048	9.34361e-25
P14069	S100a6	Protein S100-A6	S10A6_MOUSE	5.08361	5.77045	6.62349	2.73355	4.69767	7.53416	4.45438	1.82288	NotSig	0.325841	0.847165	0.874842	NotSig	1.24257	0.146139	0.261948	NotSig	-2.7904	0.059016	0.0825483	NotSig	-1.97888	0.735092	0.784191	-1.90417	0.894334	0.914883	2.4534	-4.66898	9.78859e-16	-4.16476	4.69102e-12
P14094	Atp1b1	Sodium/potassium-transporting ATPase subunit beta-1	AT1B1_MOUSE	7.65877	7.95338	7.32041	9.29552	10.3087	8.99331	10.9045	10.8255	Enrich	2.69393	0.00180052	0.00520656	NotSig	1.06258	0.0335931	0.101428	Enrich	3.46811	0.00134502	0.00328135	Enrich	1.51081	0.00088028	0.0133755	0.477605	0.203226	0.290869	10.8309	1.61637	7.76673e-148	-0.149324	0.1591
P14106	C1qb	Complement C1q subcomponent subunit B	C1QB_MOUSE	1.03098	0	0	5.98435	0	0.824748	0	5.89146	NotSig	#NAME?	0.391002	0.443422	NotSig	inf	0.391002	0.454376	NotSig				NotSig	-0.171021	0.763444	0.808301				2.34567	-4.53392	0.0599048	-6.36405	8.88155e-11
P14115	Rpl27a	60S ribosomal protein L27a	RL27A_MOUSE	9.02276	9.16279	7.94184	8.12594	9.08277	8.41834	7.04259	7.74603	NotSig	-0.0409662	0.878158	0.900087	NotSig	-0.563001	0.31931	0.435795	NotSig	-0.916952	0.0593642	0.0829191	NotSig	-0.451446	0.406731	0.514314	-1.99575	0.00185036	0.0117331	5.53538	-1.63687	5.74302e-05	-0.775974	0.00312503
P14131	Rps16	40S ribosomal protein S16	RS16_MOUSE	6.04867	6.34201	5.26285	4.83776	6.82036	6.86306	5.71057	5.33397	NotSig	0.76158	0.093083	0.137623	NotSig	0.854128	0.470727	0.527658	NotSig	0.456774	0.0394629	0.0585112	NotSig	0.849044	0.785314	0.826476	-1.17777	0.015862	0.0465563	3.80651	-2.65562	2.83781e-10	-0.910545	0.619409
P14148	Rpl7	60S ribosomal protein L7	RL7_MOUSE	7.90459	8.06973	7.82532	7.12937	7.947	8.69444	7.79603	7.36355	NotSig	-0.0466989	0.905287	0.923077	NotSig	0.507659	0.18765	0.288766	NotSig	-0.147685	0.948464	0.952782	NotSig	0.123736	0.53095	0.608935	-0.138245	0.444568	0.519722	4.04916	-3.06875	7.5952e-17	-0.566717	0.215273
P14152	Mdh1	Malate dehydrogenase, cytoplasmic	MDHC_MOUSE	6.60011	6.97296	6.31437	6.55753	7.88329	7.78138	8.97738	8.46351	NotSig	1.14603	0.0526096	0.0909343	NotSig	0.846031	0.0282782	0.0904087	Enrich	2.54902	0.00409914	0.00873732	Enrich	1.90507	0.00034134	0.0114227	1.071	0.00452273	0.0205942	8.94434	0.765057	5.53326e-27	-0.894238	4.19202e-26
P14206	Rpsa	40S ribosomal protein SA	RSSA_MOUSE	2.73127	4.28453	3.15868	2.36695	7.27103	5.21535	4.82737	3.29154	NotSig	2.69378	0.0647846	0.100939	NotSig	0.875989	0.142718	0.257726	NotSig	0.910411	0.229679	0.268739	NotSig	-0.846872	0.562467	0.636255	-2.5834	0.00185686	0.0117331	7.62078	-0.72621	0.317673	0.849565	1.62153e-23
P14211	Calr	Calreticulin	CALR_MOUSE	4.92772	5.20843	4.63883	8.29794	5.14623	5.9831	4.90269	8.14794	NotSig	0.122403	0.655464	0.701099	NotSig	0.800162	0.187786	0.288766	NotSig	0.284941	0.520383	0.549698	NotSig	-0.188347	0.536259	0.613773	-0.219333	0.530768	0.600955	8.98597	-0.285433	0.090136	-0.162874	0.229712
P14231	Atp1b2	Sodium/potassium-transporting ATPase subunit beta-2	AT1B2_MOUSE	5.36182	5.35909	2.40736	6.14217	7.95769	6.02309	6.84204	7.20866	Enrich	3.07402	0.0229746	0.0444931	NotSig	0.713624	0.114564	0.21736	NotSig	3.08601	0.0483185	0.0693726	Enrich	1.05744	0.00894568	0.0372538	-1.54594	0.18116	0.268997	5.44221	-3.88293	1.91024e-25	-2.28441	0.00946336
P14602;P14602-2;P14602-3	Hspb1	Heat shock protein beta-1;Isoform B of Heat shock protein beta-1;Isoform C of Heat shock protein beta-1	HSPB1_MOUSE	2.40082	1.74752	4.31988	1.78513	3.85558	2.58975	2.32101	0	NotSig	0.215316	0.507104	0.559605	NotSig	1.49316	0.680491	0.724042	NotSig	-3.67963	0.343299	0.388684	NotSig	#NAME?	0.391002	0.49801	-2.34652	0.370537	0.462756	1.6346	-5.20664	6.29729e-16	-3.97269	0.00154879
P14685	Psmd3	26S proteasome non-ATPase regulatory subunit 3	PSMD3_MOUSE	0	0.907287	0.839821	2.87081	5.14846	4.09852	4.68102	4.57006	Enrich	inf	0.000136463	0.000660691	NotSig	2.59178	0.0333572	0.101059	Enrich	3.45936	0.0163482	0.0279019	NotSig	1.59423	0.0360462	0.0731068	-0.483872	0.169595	0.254437	6.44018	0.242545	0.0724633	-0.13447	0.636103
P14824	Anxa6	Annexin A6	ANXA6_MOUSE	4.84885	4.72424	5.73311	4.63427	7.55867	6.64497	8.27309	7.57472	Enrich	2.67999	0.00157457	0.00465098	Enrich	1.98857	0.00133457	0.00862359	NotSig	0.520106	0.152477	0.186644	Enrich	2.97134	7.36881e-05	0.0113696	0.739157	0.0147113	0.0441186	5.5694	0.78944	7.99707e-05	-0.257373	0.506427
P14869	Rplp0	60S acidic ribosomal protein P0	RLA0_MOUSE	1.22451	0	0.916301	1.25056	5.40302	3.17619	3.8331	1.56259	NotSig	2.62181	0.0383458	0.0689222	NotSig	inf	0.0578175	0.145715	NotSig	2.21212	0.0476816	0.0686396	NotSig	-1.00695	0.888413	0.913768	-1.71178	0.00683471	0.0266213	6.0128	-2.8383	5.08982e-39	-1.13904	0.000524171
P14873	Map1b	Microtubule-associated protein 1B	MAP1B_MOUSE	5.14826	5.73076	4.92367	5.47413	10.3519	10.4267	10.5481	9.15818	Enrich	5.07922	0.000622625	0.00215917	Enrich	4.70379	1.35015e-05	0.00211259	Enrich	5.59765	5.29876e-05	0.000569659	Enrich	3.66781	0.00035148	0.0114472	0.239329	0.500327	0.572311	13.2792	2.18342	9.69403e-302	3.16057	0
P15105	Glul	Glutamine synthetase	GLNA_MOUSE	6.47617	6.6279	5.76422	7.7963	7.92604	7.32565	7.98409	8.44218	NotSig	1.32239	0.032533	0.0597235	NotSig	0.762189	0.17742	0.288495	Enrich	2.07387	0.0111656	0.0202876	NotSig	0.620497	0.177617	0.258294	0.0650068	0.823019	0.859241	7.1949	-4.40216	4.67988e-174	-2.11091	0.435296
P15116	Cdh2	Cadherin-2	CADH2_MOUSE	0	0	0	4.4283	8.17013	5.86745	5.59417	7.82862	Enrich	inf	0.00224269	0.00624863	Enrich	inf	0.00148551	0.00916536	Enrich	inf	0.00289329	0.00647492	NotSig	3.2763	0.384117	0.496896	-3.04913	0.0509366	0.105595	6.55515	-0.400175	0.392728	0.692048	8.9838e-08
P15209;P15209-3;P15209-4	Ntrk2	BDNF/NT-3 growth factors receptor;Isoform L1 of BDNF/NT-3 growth factors receptor;Isoform L10 of BDNF/NT-3 growth factors receptor	NTRK2_MOUSE	0	0	0	4.87863	5.6556	2.04673	3.15332	4.05481	Enrich	inf	2.58523e-05	0.000258761	NotSig	inf	0.181828	0.288495	Enrich	inf	0.00431448	0.00910835	NotSig	-0.946839	0.0603621	0.103273	-2.47632	0.00558664	0.0235338	8.23631	-0.10706	1.61523e-14	-0.472437	0.593177
P15508	Sptb	Spectrin beta chain, erythrocytic	SPTB1_MOUSE	0	0	0	0	2.91088	0.819697	3.51936	1.54982	NotSig	inf	0.0597553	0.0966099	NotSig	inf	0.391002	0.454376	Enrich	inf	0.0012214	0.0030287	NotSig	inf	0.5	0.580066	0.0679518	0.589479	0.657654	5.05122	0.957185	0.0109911	-0.196645	0.407297
P15532	Nme1	Nucleoside diphosphate kinase A	NDKA_MOUSE	2.91882	2.96285	3.11046	3.94142	6.33313	5.41217	6.77185	6.89432	NotSig	2.94326	0.0372501	0.0672338	NotSig	1.90158	0.0921072	0.184214	NotSig	3.11803	0.0376954	0.0562978	Enrich	3.02737	0.000862461	0.0133755	0.39379	0.204098	0.291828	7.52011	0.514199	3.02511e-09	-0.706126	1.80898e-05
P15864	H1-2	Histone H1.2	H12_MOUSE	6.50341	7.52009	6.77006	6.17331	7.3242	7.93531	5.73645	5.67539	NotSig	0.700146	0.102353	0.149957	NotSig	0.530569	0.532182	0.58496	NotSig	-1.09264	0.222298	0.260528	NotSig	-0.551895	0.501322	0.581209	-1.35788	0.0557394	0.112255
P16045	Lgals1	Galectin-1	LEG1_MOUSE	0.843184	3.50946	5.36059	2.75882	3.09778	7.12871	4.06348	1.98399	NotSig	2.42499	0.145197	0.204137	NotSig	1.08715	0.177815	0.288495	Deplete	-1.2384	0.0286066	0.0444837	NotSig	-0.428599	0.768548	0.813094	0.462838	0.433279	0.50796	0.75943	-5.12304	7.04805e-07	-4.92958	0.000563427
P16054	Prkce	Protein kinase C epsilon type	KPCE_MOUSE	0	0.706342	1.00223	3.70754	5.48729	5.05368	7.00171	6.64683	Enrich	inf	1.80884e-05	0.000215098	Enrich	4.5598	0.00358397	0.017582	Enrich	5.11863	0.00776267	0.0150402	Enrich	2.99002	0.00581069	0.0294533	1.5674	0.0021783	0.0129748	8.89519	1.92645	6.18698e-71	-0.077241	0.0423855
P16110	Lgals3	Galectin-3	LEG3_MOUSE	0.949144	2.08436	2.77397	1.08181	2.18457	2.59957	0	0	NotSig	1.63197	0.466726	0.521959	NotSig	1.13682	0.802063	0.835352	NotSig	#NAME?	0.201477	0.238465	NotSig	#NAME?	0.391002	0.49801	#NAME?	0.182757	0.269392	0			#NAME?	0.00639434
P16125	Ldhb	L-lactate dehydrogenase B chain	LDHB_MOUSE	7.10387	7.25051	6.50021	7.45543	10.2293	8.58577	10.0519	10.5182	Enrich	3.05281	0.00167048	0.00487149	Enrich	1.37956	0.00849369	0.0344409	Enrich	3.3375	0.00356161	0.0077411	Enrich	3.05059	5.47122e-05	0.0113696	-0.159799	0.309066	0.401093	8.7292	0.529318	3.22329e-23	-1.08144	1.24228e-25
P16283	Slc4a3	Anion exchange protein 3	B3A3_MOUSE	0	0	0	3.83403	3.23851	2.40586	6.00689	5.92586	NotSig	inf	0.059594	0.0966099	NotSig	inf	0.184274	0.288495	Enrich	inf	8.3592e-05	0.000574046	Enrich	2.03438	0.00624234	0.0303061	2.15019	0.0833027	0.146909	7.69512	1.89186	7.34256e-33	1.49598	6.28389e-37
P16330	Cnp	2',3'-cyclic-nucleotide 3'-phosphodiesterase	CN37_MOUSE	8.7679	8.85447	7.15995	7.72645	10.0531	9.40381	9.71088	9.05759	NotSig	1.19053	0.0300296	0.0557882	NotSig	0.550276	0.0289405	0.0917039	Enrich	2.37948	0.0101682	0.0187846	Enrich	1.30463	0.00317628	0.0210083	-0.35141	0.119982	0.19237	6.08511	-5.40358	8.76857e-134	-2.19292	0.390612
P16388	Kcna1	Potassium voltage-gated channel subfamily A member 1	KCNA1_MOUSE	0	0	0	0.906185	3.95908	0.683718	5.35642	5.13965	NotSig	inf	0.0580789	0.0966099	NotSig	inf	0.391002	0.454376	Enrich	inf	0.000164336	0.000676142	NotSig	3.60013	0.0176559	0.0522593	0.530912	0.370711	0.462756	5.01247	-3.70833	5.47546e-49	-2.87243	7.35311e-73
P16460	Ass1	Argininosuccinate synthase	ASSY_MOUSE	0	0	0.776473	3.16235	5.9886	5.16788	5.92082	6.56056	Enrich	inf	8.35174e-06	0.000166148	Enrich	inf	4.79027e-05	0.00270019	Enrich	5.02626	0.00456728	0.00958561	NotSig	2.76461	0.0482005	0.0878016	-0.0207359	0.809907	0.849198	5.6239	1.36595	1.88375e-08	0.194706	0.0269563
P16546	Sptan1	Spectrin alpha chain, non-erythrocytic 1	SPTN1_MOUSE	5.90802	6.24022	5.63555	6.70285	10.2457	8.77989	9.7342	9.46476	Enrich	4.22447	0.00126237	0.00387445	Enrich	2.58373	0.00174924	0.010317	Enrich	3.97239	0.00108848	0.00274656	Enrich	2.71611	0.0005968	0.0130047	-0.480612	0.0630398	0.122113	7.2644	0.520099	5.80278e-12	-0.211352	0.583222
P16675	Ctsa	Lysosomal protective protein	PPGB_MOUSE	0	0	0	2.27897	0	0	0	2.19854	NotSig				NotSig				NotSig				NotSig	-0.233819	0.978162	0.982706				5.56366	-1.86501	1.09489e-08	-1.33268	0.00610891
P16858	Gapdh	Glyceraldehyde-3-phosphate dehydrogenase	G3P_MOUSE	9.68323	9.46015	10.0306	9.7477	12.0688	10.784	12.419	12.7021	Enrich	2.39593	0.000191141	0.000839068	Enrich	1.34335	0.00917288	0.0366915	Enrich	2.39672	0.000756346	0.00200551	Enrich	2.87363	0.0010815	0.0142727	0.374681	0.363063	0.456034	2.84605	-0.596953	0.686383	-0.934103	0.0484781
P17095	Hmga1	High mobility group protein HMG-I/HMG-Y	HMGA1_MOUSE	4.5438	4.70045	4.46186	3.24885	4.40685	6.08923	3.66867	1.8332	NotSig	-0.170713	0.706074	0.748536	NotSig	1.00056	0.125618	0.232695	NotSig	-0.663218	0.28782	0.329775	NotSig	-3.17416	0.367573	0.480452	-0.513712	0.287071	0.379007	1.91691	0.55399	0.363984	1.6694	0.276164
P17156	Hspa2	Heat shock-related 70 kDa protein 2	HSP72_MOUSE	0	0	0	3.83322	5.28124	4.25131	6.69091	6.32684	Enrich	inf	0.000171173	0.000776774	Enrich	inf	0.00041934	0.00451553	Enrich	inf	0.000143685	0.000637365	Enrich	2.50399	0.00195903	0.0169778	1.44893	0.00751693	0.0283995	4.13236	-2.85792	7.06643e-08	-1.95721	0.000361511
P17182	Eno1	Alpha-enolase	ENOA_MOUSE	6.06917	6.1446	6.32327	6.40076	7.66036	7.26004	8.78218	8.42773	Enrich	1.53849	0.00821036	0.0188154	Enrich	1.08252	0.0121898	0.0466545	Enrich	2.44424	0.000558235	0.00155947	Enrich	1.98521	0.00188989	0.016706	1.15225	0.0063458	0.0253307	5.89779	-0.372497	0.112934	-0.142509	0.314406
P17183	Eno2	Gamma-enolase	ENOG_MOUSE	7.01433	7.17303	7.38596	7.32689	8.72385	8.19223	9.64664	9.28869	Enrich	1.62154	0.0109467	0.0237885	Enrich	1.00603	0.00695089	0.0297735	Enrich	2.20748	0.00111415	0.00280394	Enrich	1.92639	0.00121652	0.0149831	0.922516	0.00615897	0.0247556	9.45866	1.91069	2.59246e-97	0.10326	0.000175013
P17426;P17426-2	Ap2a1	AP-2 complex subunit alpha-1;Isoform B of AP-2 complex subunit alpha-1	AP2A1_MOUSE	6.60656	6.70455	6.45469	7.87325	8.09554	7.48592	9.26622	9.92098	Enrich	1.42532	0.0164104	0.0334286	NotSig	0.815105	0.0964176	0.190277	Enrich	2.66034	0.00581431	0.0117639	Enrich	2.02777	0.00192215	0.016822	1.15774	0.00877417	0.0316614	7.3894	-0.792319	0.0464182	1.09186	1.1843e-14
P17427	Ap2a2	AP-2 complex subunit alpha-2	AP2A2_MOUSE	5.26952	5.5872	4.85614	6.63513	7.06176	6.43946	8.13124	8.73452	Enrich	1.73127	0.00772234	0.0178458	NotSig	0.877238	0.122782	0.228551	Enrich	2.8042	0.027052	0.0423648	Enrich	2.06946	0.000887255	0.013409	1.07409	0.00949676	0.0335575	8.8478	1.99581	9.58137e-71	2.27788	1.1506e-114
P17665	Cox7c	Cytochrome c oxidase subunit 7C, mitochondrial	COX7C_MOUSE	5.39272	5.99216	5.72015	7.05576	4.68909	6.24981	6.23741	6.78626	NotSig	0.447401	0.69106	0.736128	NotSig	0.279751	0.492356	0.546834	NotSig	0.535314	0.339833	0.385216	NotSig	-0.287541	0.420531	0.528654	0.453899	0.404636	0.481899	4.93117	-1.97698	1.28863e-10	-1.75631	4.19162e-14
P17710-3	Hk1	Isoform HK1 of Hexokinase-1	HXK1_MOUSE	6.90344	7.02464	6.59325	8.27604	10.3969	8.57243	10.2603	10.7514	Enrich	3.41316	0.000995008	0.00318913	NotSig	1.66964	0.0323721	0.099434	Enrich	3.58762	0.00046326	0.0013507	Enrich	2.42808	0.000783987	0.0133563	-0.1041	0.553794	0.623611	7.13541	1.51328	6.9932e-21	1.54558	5.85179e-23
P17742	Ppia	Peptidyl-prolyl cis-trans isomerase A	PPIA_MOUSE	7.16872	7.96329	7.55505	7.7066	8.7476	9.07622	9.51278	9.09343	Enrich	1.46762	0.0224704	0.0435779	NotSig	0.957563	0.0580109	0.145715	Enrich	1.93616	0.000765546	0.00202242	NotSig	1.2918	0.0241158	0.0593524	0.772451	0.02342	0.0608963	4.99512	-1.52795	4.36481e-07	-0.458635	0.0229161
P17751	Tpi1	Triosephosphate isomerase	TPIS_MOUSE	6.70196	7.11214	7.11109	7.41352	9.05343	8.43418	9.77846	10.2744	Enrich	2.26765	0.00386151	0.00994304	Enrich	1.31779	0.00356537	0.0175627	Enrich	2.6844	0.000105629	0.000590983	Enrich	2.80991	0.000873554	0.0133755	0.756002	0.0366018	0.0828839	8.76436	1.07554	3.05347e-33	0.633319	3.32432e-22
P17809	Slc2a1	Solute carrier family 2, facilitated glucose transporter member 1	GTR1_MOUSE	5.6846	5.51316	4.38123	5.57047	6.68464	6.18701	7.98426	7.02193	NotSig	0.950928	0.0354774	0.0642283	NotSig	0.687575	0.116449	0.219893	Enrich	3.51524	0.00140186	0.00339977	Enrich	1.45293	0.00353092	0.0222468	1.31847	0.00245356	0.0140992	4.58133	-4.39168	3.78109e-36	-2.40615	0.00564062
P17879;Q61696	Hspa1b;Hspa1a	Heat shock 70 kDa protein 1B;Heat shock 70 kDa protein 1A	HS71B_MOUSE;HS71A_MOUSE	6.1633	6.2332	5.6499	5.84332	8.88964	7.58444	9.17382	8.72301	Enrich	2.48259	0.0172074	0.0348714	NotSig	1.21358	0.0568823	0.145715	Enrich	3.32556	0.00221903	0.00510946	Enrich	2.73595	0.00431668	0.024892	0.321475	0.266176	0.357454
P17897	Lyz1	Lysozyme C-1	LYZ1_MOUSE	6.91336	7.13237	7.53279	7.368	8.21984	8.65101	5.6038	5.81475	NotSig	1.93679	0.193386	0.253969	NotSig	4.03321	0.412344	0.473386	Deplete	-1.83424	0.00944863	0.0177525	NotSig	-2.20421	0.224301	0.314312	-3.14982	0.035574	0.0810895	0.253711	#NAME?	0.406022	10.8847	0.390612
P18052;P18052-2	Ptpra	Receptor-type tyrosine-protein phosphatase alpha;Isoform 2 of Receptor-type tyrosine-protein phosphatase alpha	PTPRA_MOUSE	0	0	0	0	2.56985	0	0	0	NotSig	inf	0.18534	0.246554	NotSig				NotSig								#NAME?	0.18534	0.27175	6.93595	-0.999029	0.0539068	-0.593916	0.00391206
P18242	Ctsd	Cathepsin D	CATD_MOUSE	5.01712	5.34988	4.57766	8.38038	4.86275	5.39246	4.60257	8.17714	NotSig	-0.205052	0.625974	0.674657	NotSig	0.112448	0.918588	0.938667	NotSig	-0.499335	0.976674	0.979063	NotSig	-0.265378	0.487148	0.580066	-0.256706	0.327526	0.419036	8.28805	0.045909	1.38422e-09	-0.246696	6.7722e-44
P18608	Hmgn1	Non-histone chromosomal protein HMG-14	HMGN1_MOUSE	0	0.87748	0	0	0	0.874581	0	0	NotSig				NotSig	-0.0127166	0.998209	0.998584	NotSig											5.5464	-1.51204	0.00114118	-1.83989	9.83601e-24
P18653;P18654;Q9WUT3	Rps6ka1;Rps6ka3;Rps6ka2	Ribosomal protein S6 kinase alpha-1;Ribosomal protein S6 kinase alpha-3;Ribosomal protein S6 kinase alpha-2	KS6A1_MOUSE;KS6A3_MOUSE;KS6A2_MOUSE	0	0	0	0	0	0	4.45189	2.2922	NotSig				NotSig				Enrich	inf	7.21108e-05	0.000569659	NotSig	inf	0.5	0.580066	inf	7.21108e-05	0.0026398
P18760	Cfl1	Cofilin-1	COF1_MOUSE	5.71598	6.62672	5.28808	6.07126	8.76683	7.95164	9.2045	9.10407	Enrich	3.09459	2.39497e-05	0.000246673	NotSig	1.26798	0.0197576	0.0687894	Enrich	3.83008	0.000825689	0.00216141	Enrich	3.03191	0.00423677	0.0245053	0.42485	0.103687	0.172553	8.19529	-1.3576	2.53097e-15	-0.382971	0.0736648
P18872	Gnao1	Guanine nucleotide-binding protein G(o) subunit alpha	GNAO_MOUSE	7.39002	7.79671	7.55239	8.97088	12.0142	10.3537	11.7731	11.2638	Enrich	4.55606	0.000469603	0.0017173	Enrich	2.60193	0.00129325	0.00845587	Enrich	4.06229	0.00149123	0.00358816	Enrich	2.25114	0.000732256	0.0131974	-0.215346	0.243128	0.331736	10.4727	1.61771	1.44745e-129	0.221183	1.69574e-10
P19096	Fasn	Fatty acid synthase	FAS_MOUSE	5.15757	5.06046	4.77798	5.0454	6.53783	6.07937	6.89689	7.32468	Enrich	1.41324	0.0218474	0.0425198	NotSig	1.09459	0.0800059	0.166132	Enrich	2.18989	0.000466347	0.00135557	Enrich	2.24227	0.00209871	0.0175848	0.316732	0.406114	0.483164	7.23167	-0.163479	0.0507	1.0036	2.24839e-25
P19123	Tnnc1	Troponin C, slow skeletal and cardiac muscles	TNNC1_MOUSE	0	2.60864	2.7712	0	0	6.79521	1.24836	0	NotSig				NotSig	2.40673	0.0713216	0.15374	NotSig	-3.30384	0.432877	0.463924					inf	0.181694	0.269392	2.87099	-0.229036	0.248057	10.8847	0.000311452
P19157	Gstp1	Glutathione S-transferase P 1	GSTP1_MOUSE	3.46376	4.16725	5.27526	4.95987	7.79506	6.94085	8.67552	8.41514	NotSig	3.58016	0.0334206	0.061027	Enrich	2.72741	0.00216375	0.0120409	Enrich	3.16547	0.0056028	0.0114246	Enrich	3.48853	0.00505284	0.0272098	0.846101	0.0284743	0.0696702	3.45432	-5.03978	6.82166e-46	-2.31807	1.79004e-11
P19246	Nefh	Neurofilament heavy polypeptide	NFH_MOUSE	5.1067	5.26612	2.1381	2.86929	7.10841	5.69424	4.54579	3.20955	Enrich	1.92634	0.00956065	0.0213234	NotSig	0.48646	0.266236	0.37332	NotSig	2.35182	0.0401994	0.0593272	NotSig	0.36789	0.344508	0.454227	-2.51794	0.00348107	0.0175816	8.27753	0.606142	7.3114e-25	2.89648	2.3052e-88
P19253	Rpl13a	60S ribosomal protein L13a	RL13A_MOUSE	8.45319	8.82895	8.6092	7.59774	8.29163	9.19199	8.46204	7.797	NotSig	-0.250099	0.703905	0.746524	NotSig	0.307706	0.260537	0.367688	NotSig	-0.269312	0.732331	0.755233	NotSig	0.135937	0.501399	0.581209	0.143518	0.435157	0.50965	8.50928	-2.03091	2.35978e-40	-0.325969	0.103807
P19258	Mpv17	Protein Mpv17	MPV17_MOUSE	0.927616	0	0	0	0	1.10591	1.63635	2.65916	NotSig	#NAME?	0.391002	0.443422	NotSig	inf	0.391002	0.454376	NotSig	inf	0.391002	0.422677	NotSig	inf	0.5	0.580066	inf	0.391002	0.469332	6.11451	0.327844	0.220998	0.95669	7.9442e-11
P19324	Serpinh1	Serpin H1	SERPH_MOUSE	0	0	0	5.72213	2.30112	5.11766	3.35069	5.28514	NotSig	inf	0.21094	0.273367	Enrich	inf	0.000987893	0.00706603	NotSig	inf	0.057752	0.0813078	NotSig	-0.394446	0.545118	0.621145	-0.190171	0.588715	0.657209	1.75866	-5.27973	1.50476e-14	-4.93825	3.42049e-10
P19536	Cox5b	Cytochrome c oxidase subunit 5B, mitochondrial	COX5B_MOUSE	3.35762	5.70476	1.84036	7.34804	7.26687	7.08316	8.99129	9.13139	NotSig	3.51804	0.0338591	0.0617457	NotSig	0.985381	0.174057	0.288495	Enrich	3.64156	0.0300958	0.0465794	Enrich	1.63839	0.014316	0.0477368	1.3667	0.0632942	0.12236	7.02461	-1.71697	2.43669e-16	-1.42487	4.35338e-34
P19783	Cox4i1	Cytochrome c oxidase subunit 4 isoform 1, mitochondrial	COX41_MOUSE	4.55714	6.38343	5.70244	7.63859	7.10441	7.10269	8.02559	8.59536	NotSig	1.35666	0.203298	0.264837	NotSig	0.75629	0.0335756	0.101428	Enrich	2.19612	0.00961625	0.0180085	NotSig	0.96492	0.079873	0.129483	0.881311	0.0586376	0.116311	8.50829	-1.76529	6.67014e-35	-1.92465	1.43296e-120
P19973	Lsp1	Lymphocyte-specific protein 1	LSP1_MOUSE	0	2.43099	4.53265	0.742631	1.34515	5.33147	3.63138	0	NotSig	inf	0.391002	0.443422	NotSig	1.2739	0.14903	0.266412	NotSig	-1.06839	0.194641	0.231711	NotSig	#NAME?	0.391002	0.49801	0.292418	0.187609	0.274143	0.943595	-1.92473	0.730655	1.20347	0.161455
P20029	Hspa5	Endoplasmic reticulum chaperone BiP	BIP_MOUSE	5.21904	4.96025	5.77272	7.82713	5.66982	5.60837	5.39533	7.59171	NotSig	0.567282	0.355378	0.4359	NotSig	0.817089	0.283285	0.395144	NotSig	-0.713717	0.685028	0.709745	NotSig	-0.321851	0.476674	0.580066	-0.137919	0.691532	0.748147	7.90305	-0.846087	0.0706715	-0.872611	1.23322e-10
P20060	Hexb	Beta-hexosaminidase subunit beta	HEXB_MOUSE	5.73254	6.21009	6.05026	9.83028	5.96132	6.16947	4.55472	9.63356	NotSig	-0.0456013	0.711255	0.753739	NotSig	-0.0347346	0.932851	0.949558	Deplete	-1.57476	0.0101102	0.0187015	NotSig	-0.243301	0.415242	0.522959	-1.393	0.0070553	0.0271168	5.39284	-1.12957	0.126609	-4.05274	0.175206
P20065-2	Tmsb4x	Isoform Short of Thymosin beta-4	TYB4_MOUSE	1.11577	6.68109	4.00958	0	3.88529	7.82664	3.08793	1.37307	NotSig	2.41981	0.161293	0.224585	NotSig	0.49179	0.421942	0.481908	NotSig	-2.0134	0.552665	0.580804	NotSig	inf	0.5	0.580066	-1.81392	0.592761	0.66055	8.49632	-3.13111	1.40711e-103	-2.46089	9.91007e-110
P20108	Prdx3	Thioredoxin-dependent peroxide reductase, mitochondrial	PRDX3_MOUSE	4.82796	4.62607	4.53479	5.84462	5.43508	5.33518	5.31089	6.50023	NotSig	0.526203	0.224859	0.289089	NotSig	0.716337	0.0674071	0.148596	Enrich	0.810232	0.00164616	0.00391612	NotSig	0.658759	0.0970922	0.152218	-0.163845	0.638426	0.701711	5.22943	-0.347631	0.831673	-1.03593	8.66997e-06
P20152	Vim	Vimentin	VIME_MOUSE	5.27832	5.61105	6.30113	3.93526	4.69205	5.95978	3.57845	4.28198	NotSig	-0.823856	0.347566	0.42689	NotSig	0.0310756	0.659486	0.703663	NotSig	-3.87029	0.0702532	0.0948501	NotSig	0.262596	0.531358	0.609155	-1.22483	0.0097167	0.034085	3.32929	-4.52788	2.58414e-22	-3.07485	0.00025973
P20357	Map2	Microtubule-associated protein 2	MTAP2_MOUSE	5.40797	5.61376	6.19366	4.51759	12.4304	9.21291	7.33049	6.43609	Enrich	6.99042	4.67031e-05	0.000352804	Enrich	3.829	0.00590756	0.0261287	Enrich	1.12508	0.0139206	0.0244421	Enrich	1.83087	0.0101916	0.0405787	-5.07087	5.2859e-05	0.00241353	8.75284	1.08249	9.08102e-40	-0.25058	0.211938
P20444	Prkca	Protein kinase C alpha type	KPCA_MOUSE	5.41213	6.78657	5.35445	4.97644	7.56226	7.02379	9.13061	8.44335	NotSig	0.359888	0.340948	0.419571	NotSig	0.10404	0.668185	0.711803	Enrich	3.33535	0.0106604	0.0194931	Enrich	3.46592	0.00226328	0.0177712	1.5897	0.000482003	0.00596119	8.77136	3.00111	5.38845e-87	2.95167	5.00652e-132
P20917	Mag	Myelin-associated glycoprotein	MAG_MOUSE	6.11855	6.91021	5.13439	7.1052	8.81358	7.56073	6.35638	7.45166	Enrich	2.64459	0.00123928	0.00381636	NotSig	0.712736	0.368295	0.454376	NotSig	0.614479	0.249647	0.289269	NotSig	0.118611	0.59854	0.671441	-2.4917	0.000245532	0.00441347	5.45321	-5.75712	1.49533e-121	-2.26831	0.0198958
P21107	Tpm3	Tropomyosin alpha-3 chain	TPM3_MOUSE	6.35452	7.39468	8.79096	6.19428	8.29738	10.2364	7.76695	7.68118	Enrich	1.88714	0.00386843	0.00995153	NotSig	1.64887	0.0696435	0.151911	NotSig	-1.06326	0.0481821	0.0692558	NotSig	1.27227	0.0482531	0.0878016	-0.503759	0.167594	0.252088	7.07325	-1.49745	1.19992e-05	-0.519726	0.229712
P21107-2	Tpm3	Isoform 2 of Tropomyosin alpha-3 chain	TPM3_MOUSE	3.53452	5.16882	7.37942	4.39515	6.45635	8.69213	6.05628	5.62955	NotSig	1.98218	0.0997597	0.146627	NotSig	1.98611	0.06997	0.151911	NotSig	-1.39808	0.0490739	0.0703262	NotSig	1.07126	0.158992	0.234361	-0.354049	0.368826	0.461072	7.07325	-1.49745	1.19992e-05	-0.519726	0.229712
P21278	Gna11	Guanine nucleotide-binding protein subunit alpha-11	GNA11_MOUSE	0.856541	0	0	0	8.60192	5.3465	6.1626	5.65181	Enrich	7.34133	0.0022891	0.0063586	Enrich	inf	0.00744793	0.0312978	Enrich	inf	9.86724e-06	0.000569659	Enrich	inf	0.00111224	0.0144079	-2.47349	4.68376e-05	0.00241353	7.2335	0.318764	9.96748e-07	0.69655	5.53108e-12
P21279	Gnaq	Guanine nucleotide-binding protein G(q) subunit alpha	GNAQ_MOUSE	3.32642	2.88783	6.63959	8.31698	9.97403	7.38357	8.09248	7.58804	Enrich	6.01303	0.00902334	0.0203562	Enrich	4.17625	0.0131311	0.0493343	NotSig	0.964465	0.203995	0.240628	NotSig	-0.832854	0.190727	0.274097	-1.8598	0.000569187	0.00652077	9.71756	1.44921	3.41113e-90	2.26792	5.11867e-168
P21460	Cst3	Cystatin-C	CYTC_MOUSE	3.99712	5.14525	4.68258	8.27473	5.32305	5.25664	3.78972	8.07775	NotSig	0.372949	0.396989	0.449453	NotSig	0.0677209	0.691817	0.735505	NotSig	-1.09904	0.146899	0.180649	NotSig	-0.248068	0.440844	0.550027	-1.57414	0.001579	0.0106367	9.12244	-2.97195	1.23364e-24	-4.25286	2.12347e-17
P21550	Eno3	Beta-enolase	ENOB_MOUSE	0	0	2.00551	0	0	0.995846	0.357202	1.53337	NotSig				NotSig	inf	0.391002	0.454376	NotSig	-4.2047	0.256243	0.296436	NotSig	inf	0.5	0.580066	inf	0.391002	0.469332	3.8896	1.5574	0.01101	3.92358	4.47697e-09
P21836	Ache	Acetylcholinesterase	ACES_MOUSE	0	1.04839	1.01911	4.62831	2.62705	2.24523	5.5507	5.44064	NotSig	inf	0.182399	0.245991	NotSig	1.32056	0.501238	0.554614	Enrich	3.56542	0.0193932	0.0319406	NotSig	0.827848	0.0178293	0.0523628	1.31612	0.149604	0.23005	7.80946	2.04794	1.43583e-37	4.01045	1.54424e-96
P21956;P21956-2	Mfge8	Lactadherin;Isoform 2 of Lactadherin	MFGM_MOUSE	0	0	0	4.696	0.778542	0	0.612562	4.49035	NotSig	inf	0.391002	0.443422	NotSig				NotSig	inf	0.391002	0.422677	NotSig	-0.262754	0.637224	0.704934	-0.778427	0.872738	0.898507	2.95055	-4.77814	7.57802e-18	-5.58224	1.51753e-41
P21995	Emb	Embigin	EMB_MOUSE	0	0	3.12057	2.73179	6.85114	3.40035	5.85191	5.48626	Enrich	inf	2.47214e-06	0.000128272	NotSig	inf	0.182177	0.288495	NotSig	0.494668	0.235878	0.275095	NotSig	0.186905	0.208025	0.295183	-0.834249	0.0941383	0.160824	4.64619	0.876927	0.015858	0.603847	0.00284016
P22315	Fech	Ferrochelatase, mitochondrial	HEMH_MOUSE	2.95113	0.95365	1.48363	4.81888	3.59735	0.902777	3.48842	5.0458	NotSig	0.531653	0.20896	0.270929	NotSig	-0.220311	0.970358	0.977066	NotSig	1.37524	0.116371	0.147338	NotSig	0.193146	0.363739	0.476676	-0.054331	0.711194	0.765698
P22437	Ptgs1	Prostaglandin G/H synthase 1	PGH1_MOUSE	8.25533	8.40882	7.74337	11.8728	7.86213	8.45453	6.78472	11.5736	NotSig	-0.571191	0.488495	0.542553	NotSig	0.190132	0.942505	0.956165	NotSig	-1.0411	0.112728	0.143231	NotSig	-0.359562	0.329484	0.436466	-1.03184	0.0248491	0.0634716	0.622519	-3.02823	0.362425	-5.66251	2.42416e-05
P22682	Cbl	E3 ubiquitin-protein ligase CBL	CBL_MOUSE	0	0	0	0	4.93258	4.67618	5.65292	4.76818	Enrich	inf	3.13056e-05	0.00028945	Enrich	inf	0.000133174	0.00300666	Enrich	inf	8.13027e-05	0.000569659	NotSig	inf	0.0321025	0.0692025	0.758242	0.0227289	0.0594195	4.5629	-0.080029	0.249212	0.97028	0.0208764
P22723;P22723-2	Gabrg2	Gamma-aminobutyric acid receptor subunit gamma-2;Isoform 2S of Gamma-aminobutyric acid receptor subunit gamma-2	GBRG2_MOUSE	2.30446	3.30903	0	5.95504	6.195	5.38014	5.85324	6.60917	NotSig	2.72299	0.0578157	0.0966099	NotSig	1.49244	0.162233	0.283165	Enrich	inf	6.46387e-05	0.000569659	NotSig	0.550028	0.172418	0.252168	-0.419772	0.395887	0.473109	6.56785	0.722099	4.36164e-07	-0.138983	0.0315554
P22892	Ap1g1	AP-1 complex subunit gamma-1	AP1G1_MOUSE	3.93828	1.92143	2.67053	3.91351	6.33185	4.96246	6.68994	6.98658	Enrich	2.38713	0.00209275	0.00593531	NotSig	2.20447	0.0692167	0.151661	Enrich	3.68747	0.0181837	0.0304015	Enrich	3.09059	0.000681002	0.0131974	0.379488	0.16648	0.251196	5.39707	0.294307	0.0184517	0.29791	0.871849
P23242	Gja1	Gap junction alpha-1 protein	CXA1_MOUSE	5.01922	5.10559	2.48058	5.95887	5.17103	5.18218	4.34701	6.35357	NotSig	0.0765613	0.666973	0.712302	NotSig	-0.0495391	0.853602	0.881437	NotSig	1.55113	0.109717	0.139715	NotSig	0.364226	0.21175	0.299713	-0.825634	0.0180469	0.0513548	3.3717	-5.73035	8.23128e-34	-4.8375	3.24851e-15
P23492	Pnp	Purine nucleoside phosphorylase	PNPH_MOUSE	6.4969	2.53399	6.33645	4.788	4.47988	3.75564	4.83044	5.62575	NotSig	-0.92754	0.271788	0.343956	NotSig	0.612005	0.562509	0.612725	NotSig	-1.76732	0.086329	0.113406	NotSig	0.695546	0.268039	0.367361	-0.631269	0.833647	0.867428	3.11295	-1.48075	0.0960116	-1.91264	0.695776
P23506;P23506-2	Pcmt1	Protein-L-isoaspartate(D-aspartate) O-methyltransferase;Isoform 2 of Protein-L-isoaspartate(D-aspartate) O-methyltransferase	PIMT_MOUSE	0.993111	0.900099	1.2063	4.31673	6.30009	5.58073	7.98908	6.98914	Enrich	4.47459	0.0101212	0.0223023	Enrich	4.13222	0.0111117	0.0428984	Enrich	6.56801	0.00205832	0.00478165	Enrich	2.70096	0.00190751	0.0167614	1.6852	0.00325115	0.0167726	7.02645	0.514328	2.50152e-05	-0.805348	1.28646e-07
P23780;Q8VC60	Glb1;Glb1l	Beta-galactosidase;Beta-galactosidase-1-like protein	BGAL_MOUSE;GLB1L_MOUSE	0	0	1.33924	0	0	0	0	0	NotSig				NotSig				NotSig	#NAME?	0.391002	0.422677
P23818	Gria1	Glutamate receptor 1	GRIA1_MOUSE	0	0.974141	1.79607	5.58488	5.02748	1.08955	5.38809	6.1455	Enrich	inf	0.000303229	0.0012143	NotSig	0.48978	0.939661	0.954007	NotSig	2.90622	0.0390922	0.0579915	NotSig	0.53648	0.134439	0.201873	0.326322	0.28821	0.380164	7.32064	-0.048072	1.67382e-06	-1.46647	1.7238e-38
P23819;P23819-4	Gria2	Glutamate receptor 2;Isoform 4 of Glutamate receptor 2	GRIA2_MOUSE	1.26799	0.78881	1.89594	6.18466	7.01494	3.51122	6.5529	6.84883	Enrich	5.52541	0.0053856	0.0131882	NotSig	3.48837	0.124097	0.230194	Enrich	3.89151	0.0219708	0.0354523	NotSig	0.598641	0.0914493	0.144906	-0.427711	0.0988747	0.166945	9.98822	1.08486	3.20621e-96	-0.637595	7.75115e-15
P23927	Cryab	Alpha-crystallin B chain	CRYAB_MOUSE	0	1.16903	1.09072	0	1.15615	3.14694	1.07277	0	NotSig	inf	0.391002	0.443422	NotSig	1.12663	0.25766	0.363981	NotSig	-0.07555	0.991021	0.991712					-0.349439	0.959566	0.965908	5.66278	-5.3499	4.52409e-116	-2.65746	0.636695
P24270	Cat	Catalase	CATA_MOUSE	7.15183	6.42048	7.34928	6.95505	7.17304	6.65736	5.48029	7.13061	NotSig	-0.0636009	0.951906	0.962759	NotSig	0.219661	0.577317	0.626801	Deplete	-1.91118	0.00732035	0.0143261	NotSig	0.165273	0.843167	0.875884	-1.63189	0.00812625	0.0299584	4.12142	-2.50944	2.54414e-09	-0.722261	0.355224
P24288	Bcat1	Branched-chain-amino-acid aminotransferase, cytosolic	BCAT1_MOUSE	4.50675	4.67369	1.78288	4.82421	7.25993	6.34567	8.11174	7.90006	Enrich	2.63988	0.00551849	0.0134418	Enrich	1.63589	0.00828224	0.0338414	Enrich	5.71957	0.00678698	0.0134011	Enrich	3.09049	0.000113242	0.0113696	0.909621	0.038255	0.0855563	7.39189	1.2048	1.23379e-18	4.21126	2.04939e-80
P24369	Ppib	Peptidyl-prolyl cis-trans isomerase B	PPIB_MOUSE	3.21919	4.35055	1.93369	5.95929	4.46206	4.67138	3.57954	5.65056	NotSig	0.493845	0.344434	0.423421	NotSig	0.374713	0.315054	0.431759	NotSig	0.730504	0.237988	0.277218	NotSig	-0.367583	0.280841	0.382112	-0.906587	0.0169507	0.0491044	6.76314	-1.04097	0.000482791	-1.03283	0.000496094
P24452	Capg	Macrophage-capping protein	CAPG_MOUSE	0.635036	2.14057	0.548223	0.77341	0	0.820235	0.00702082	0	NotSig	#NAME?	0.391002	0.443422	NotSig	-2.0983	0.413433	0.474022	NotSig	-7.50566	0.396344	0.427807	NotSig	#NAME?	0.391002	0.49801	inf	0.391002	0.469332	0	#NAME?	0.00100011	#NAME?	0.0105458
P24472	Gsta4	Glutathione S-transferase A4	GSTA4_MOUSE	0.973026	0.804302	0	0.708992	5.0129	4.85322	6.17781	6.11832	Enrich	3.23672	0.0220354	0.0428552	Enrich	3.78671	0.012888	0.0486593	Enrich	inf	2.52851e-05	0.000569659	Enrich	5.50849	0.00263865	0.0196744	1.15008	0.00952824	0.0335868	5.70225	-1.23827	0.603967	-0.155977	1.32131e-05
P24527	Lta4h	Leukotriene A-4 hydrolase	LKHA4_MOUSE	2.56785	1.40947	0.87731	0.903707	5.55408	4.83046	6.56051	6.22084	NotSig	2.64726	0.0397791	0.0710803	NotSig	3.16483	0.0215368	0.0741113	Enrich	5.22924	0.00529986	0.0108687	Enrich	4.7263	0.0079377	0.0345881	1.07422	0.0212417	0.0574518	5.67501	-0.363447	0.345231	-0.215922	0.613306
P24529	Th	Tyrosine 3-monooxygenase	TY3H_MOUSE	0	0	0.825115	4.09876	8.88846	8.34577	11.1657	10.6888	Enrich	inf	3.43288e-06	0.000146061	Enrich	inf	0.000433415	0.00456675	Enrich	10.0424	0.000834942	0.00217966	Enrich	6.56404	6.00463e-05	0.0113696	2.29198	3.93862e-05	0.00241353	10.8118	5.91993	0	8.95798	0
P24547	Impdh2	Inosine-5'-monophosphate dehydrogenase 2	IMDH2_MOUSE	3.44443	2.88847	3.77031	4.66425	6.88292	5.12366	6.55222	5.73586	NotSig	2.73171	0.0586708	0.0966099	NotSig	1.60523	0.118866	0.222979	NotSig	1.63975	0.130257	0.162552	NotSig	0.809455	0.160246	0.235961	-0.291058	0.221553	0.309	1.04228	-2.7799	0.0460005	1.67707	0.558532
P24549	Aldh1a1	Retinal dehydrogenase 1	AL1A1_MOUSE	4.90453	4.10923	4.74054	4.56281	7.35859	7.26505	10.8937	10.4653	Enrich	2.28496	0.00803198	0.0184991	Enrich	3.22079	0.000103152	0.00287315	Enrich	5.98066	0.00079023	0.00207997	NotSig	5.98723	0.0192694	0.0539718	3.52196	1.19822e-05	0.00192648	10.0019	2.97137	1.99738e-78	5.06482	1.92034e-139
P24668	M6pr	Cation-dependent mannose-6-phosphate receptor	MPRD_MOUSE	0	1.07924	0	3.0222	6.91212	4.07996	5.64107	5.7494	Enrich	inf	6.16353e-05	0.000402834	NotSig	2.8561	0.14197	0.257072	Enrich	inf	5.17267e-05	0.000569659	NotSig	2.15971	0.0747442	0.122941	-1.30906	0.0035736	0.0178224	6.0695	-1.53472	4.58605e-07	-1.16075	4.25809e-08
P25444	Rps2	40S ribosomal protein S2	RS2_MOUSE	6.95504	6.78924	6.11172	5.81917	8.40212	7.54074	6.84386	6.17907	NotSig	1.30418	0.0350092	0.0634643	NotSig	0.802453	0.0926359	0.184994	NotSig	0.57229	0.270068	0.311049	NotSig	-0.0906821	0.682132	0.741483	-1.50259	0.00614687	0.0247556	7.14569	-1.66228	1.33554e-13	-0.431573	0.316442
P26039	Tln1	Talin-1	TLN1_MOUSE	1.84267	0	2.1604	0.81928	3.32365	2.9059	3.99629	4.18629	NotSig	0.481056	0.278776	0.351667	NotSig	inf	0.0591192	0.145715	NotSig	0.412976	0.253072	0.292885	NotSig	2.99323	0.0241394	0.0593524	0.653634	0.107621	0.177961	4.89468	-2.13882	3.06544e-12	-1.42544	7.37298e-09
P26040	Ezr	Ezrin	EZRI_MOUSE	1.42204	1.15481	1.52501	4.05614	3.43332	2.58832	0	2.53294	NotSig	0.65686	0.323283	0.400825	NotSig	1.94363	0.489522	0.543914	NotSig	#NAME?	0.391002	0.422677	NotSig	-1.1805	0.660982	0.723247	#NAME?	0.0653259	0.125284	1.49827	-4.17637	0.066873	-5.46085	1.58137e-17
P26041	Msn	Moesin	MOES_MOUSE	4.50642	3.43043	5.07113	4.98761	6.0253	5.73066	5.09902	5.33823	NotSig	0.830394	0.14785	0.207654	NotSig	1.81243	0.167347	0.288495	NotSig	-0.83589	0.977043	0.979091	NotSig	-0.0820923	0.618517	0.687758	-0.961761	0.0348342	0.0799447	2.53086	-3.64863	1.02147e-10	-3.07613	0.000715348
P26049	Gabra3	Gamma-aminobutyric acid receptor subunit alpha-3	GBRA3_MOUSE	0	0	0	0	4.7139	0.952908	2.15827	0.936884	Enrich	inf	3.5675e-05	0.000307543	NotSig	inf	0.391002	0.454376	Enrich	inf	0.000597181	0.001649	NotSig	inf	0.5	0.580066	-2.85562	1.0704e-05	0.00192648	6.282	1.74361	4.71841e-11	2.12149	1.11947e-26
P26350	Ptma	Prothymosin alpha	PTMA_MOUSE	5.76328	7.71439	5.56939	5.33494	6.06443	8.30585	4.64424	5.17531	NotSig	0.440224	0.51411	0.566158	NotSig	0.198167	0.617672	0.666265	NotSig	-1.00404	0.13204	0.164277	NotSig	-0.332614	0.72437	0.774685	-1.50546	0.0330707	0.0774325	5.43555	-3.83311	1.93274e-69	-1.34727	0.000306063
P26443	Glud1	Glutamate dehydrogenase 1, mitochondrial	DHE3_MOUSE	6.09419	6.31561	5.34167	7.21307	7.27379	6.888	7.07179	8.06493	NotSig	1.02226	0.0693084	0.10642	NotSig	0.606217	0.264311	0.371404	Enrich	1.71561	0.00329896	0.00724709	NotSig	0.791913	0.0491393	0.08879	-0.177733	0.462012	0.536112	7.91624	-0.26146	0.000118081	0.413471	8.18891e-24
P26638	Sars1	Serine--tRNA ligase, cytoplasmic	SYSC_MOUSE	4.20206	4.31401	2.93789	3.61527	7.31158	5.90957	6.84599	6.39116	Enrich	3.15642	9.36167e-05	0.000520093	Enrich	1.63323	0.00951395	0.0377155	Enrich	3.46429	0.0256917	0.0404553	Enrich	2.86547	0.000725448	0.0131974	-0.428863	0.111101	0.182582
P26645	Marcks	Myristoylated alanine-rich C-kinase substrate	MARCS_MOUSE	4.12281	4.89608	4.09124	5.27092	6.99547	7.0432	6.70063	6.84005	Enrich	2.79022	0.0039601	0.0101023	NotSig	1.95236	0.0160293	0.0582486	Enrich	2.57544	0.00995276	0.0184699	NotSig	1.58226	0.057101	0.0989054	-0.165033	0.578164	0.647275	8.82582	-0.545431	1.04768e-13	-0.538972	0.145318
P26883	Fkbp1a	Peptidyl-prolyl cis-trans isomerase FKBP1A	FKB1A_MOUSE	0	0.985567	1.08271	3.83182	4.94346	5.52144	7.27191	5.84461	Enrich	inf	1.38852e-05	0.000199917	NotSig	3.66463	0.0182504	0.064556	Enrich	5.07218	0.00851775	0.0162591	Enrich	1.99015	0.00463567	0.0261137	2.42492	0.00152827	0.0105055	7.24347	-1.45896	8.17615e-12	-1.78826	1.22853e-61
P27048;P63163	Snrpb;Snrpn	Small nuclear ribonucleoprotein-associated protein B;Small nuclear ribonucleoprotein-associated protein N	RSMB_MOUSE;RSMN_MOUSE	1.09108	0	1.40201	1.24998	5.38108	2.94401	3.69401	1.36851	Enrich	3.17715	0.0245717	0.0471215	NotSig	inf	0.0608164	0.145715	NotSig	0.00484818	0.200579	0.237598	NotSig	-1.45157	0.9534	0.964725	-1.88666	0.0121991	0.0392988
P27545	Cers1	Ceramide synthase 1	CERS1_MOUSE	0	0	0	1.02376	2.38235	0	4.7942	1.74587	NotSig	inf	0.182151	0.245991	NotSig				Enrich	inf	0.000711282	0.00191074	NotSig	0.349371	0.759842	0.805702	1.15175	0.177701	0.264541	0.336921	#NAME?	0.406022	10.8847	0.390612
P27546;P27546-2	Map4	Microtubule-associated protein 4;Isoform 2 of Microtubule-associated protein 4	MAP4_MOUSE	3.353	4.6444	3.14407	5.84319	7.91093	7.36523	6.64948	6.18834	NotSig	3.82786	0.0283124	0.0530014	Enrich	2.76952	0.000101613	0.00287315	NotSig	2.97933	0.0411696	0.0605721	NotSig	0.31768	0.310815	0.416843	-1.20509	0.0147042	0.0441186	8.17225	0.054853	3.31991e-11	1.26919	2.0083e-43
P27546-4	Map4	Isoform 4 of Microtubule-associated protein 4	MAP4_MOUSE	2.20509	3.24785	0.743741	4.18445	7.24379	6.5689	5.77839	4.82139	Enrich	4.55574	0.0112331	0.0242853	Enrich	3.44681	0.000195718	0.00316145	Enrich	5.03089	0.00416574	0.00884642	NotSig	0.618555	0.0762629	0.125	-1.4322	0.00571085	0.0239178	8.17225	0.054853	3.31991e-11	1.26919	2.0083e-43
P27601	Gna13	Guanine nucleotide-binding protein subunit alpha-13	GNA13_MOUSE	0.553815	0.783107	0.777418	1.67118	5.09499	3.16171	4.12658	4.72724	Enrich	5.20545	0.00272463	0.00739657	NotSig	2.83659	0.129542	0.238795	Enrich	3.17729	0.0181653	0.0303885	NotSig	2.5348	0.0484533	0.0880428	-0.961515	0.0222139	0.0589945	4.79252	-2.15181	0.00853246	-0.732836	0.855528
P27612	Plaa	Phospholipase A-2-activating protein	PLAP_MOUSE	0	0	0	0	5.13987	3.23291	6.05447	5.5184	Enrich	inf	5.77707e-06	0.000146663	NotSig	inf	0.0582968	0.145715	Enrich	inf	3.65875e-05	0.000569659	NotSig	inf	0.0262174	0.0619352	0.953707	0.00498819	0.0220394	5.4148	0.109822	0.166159	-0.306796	0.912375
P27659	Rpl3	60S ribosomal protein L3	RL3_MOUSE	8.05732	8.03346	7.22004	6.87692	8.08747	8.18262	6.91475	6.65333	NotSig	-0.0662846	0.940559	0.953738	NotSig	0.0482677	0.745208	0.784429	NotSig	-0.342205	0.4033	0.434661	NotSig	-0.296307	0.474799	0.580066	-1.16542	0.00331978	0.016963	5.51826	-1.33382	0.000591868	-0.448855	0.308641
P27773	Pdia3	Protein disulfide-isomerase A3	PDIA3_MOUSE	7.05619	7.39034	6.52852	11.2828	7.25591	7.37133	6.47438	11.0745	NotSig	-0.0448674	0.73469	0.774099	NotSig	0.0293528	0.970822	0.977066	NotSig	-0.148539	0.914721	0.922177	NotSig	-0.276696	0.480808	0.580066	-0.734061	0.0484673	0.101936	6.7985	-1.50292	1.62035e-08	-1.26538	3.50748e-07
P28028	Braf	Serine/threonine-protein kinase B-raf	BRAF_MOUSE	0	0	0.771047	1.48091	5.99717	4.81291	7.16245	6.24024	Enrich	inf	5.17191e-06	0.000146626	Enrich	inf	0.000570451	0.00506379	Enrich	6.27496	0.00285211	0.00639273	Enrich	4.46205	0.00878512	0.0367485	1.19722	0.0021789	0.0129748	6.4539	-0.035662	0.0265377	-0.738129	0.00138097
P28184	Mt3	Metallothionein-3	MT3_MOUSE	4.88811	4.94852	3.32966	5.73972	5.6347	6.41904	7.13857	7.17584	NotSig	0.660399	0.30475	0.381805	NotSig	1.35657	0.0427488	0.123198	NotSig	3.07292	0.0436328	0.0637385	Enrich	1.4174	0.0049639	0.0270496	1.39607	0.0245808	0.0629529	7.07312	-1.9716	0.127932	-1.75008	5.62196e-05
P28474	Adh5	Alcohol dehydrogenase class-3	ADHX_MOUSE	2.24513	2.31401	2.05363	4.45802	5.60486	5.41528	6.6059	6.19779	NotSig	2.20674	0.0787512	0.118927	NotSig	1.82811	0.102528	0.199069	Enrich	3.49929	0.0312258	0.0480616	Enrich	1.72933	0.00484059	0.0267112	0.959441	0.0281178	0.0692738	4.11529	-2.68445	3.92567e-09	-2.38374	2.16042e-11
P28481;P28481-1;P28481-2;P28481-4;P28481-5;P28481-6;P28481-7	Col2a1	Collagen alpha-1(II) chain;Isoform 2 of Collagen alpha-1(II) chain;Isoform 3 of Collagen alpha-1(II) chain;Isoform 4 of Collagen alpha-1(II) chain;Isoform 5 of Collagen alpha-1(II) chain;Isoform 6 of Collagen alpha-1(II) chain;Isoform 7 of Collagen alpha-1(II) chain	CO2A1_MOUSE	1.94442	2.50261	4.27725	2.61777	1.69188	10.0456	6.62015	0	NotSig	-1.01691	0.925196	0.939545	NotSig	2.175	0.0554564	0.145715	NotSig	-1.32885	0.426146	0.457264	NotSig	#NAME?	0.391002	0.49801	2.05938	0.0575825	0.115077	1.47934	-1.98867	1	10.8847	0.0481152
P28571;P28571-1;P28571-2	Slc6a9	Sodium- and chloride-dependent glycine transporter 1;Isoform GlyT-1A of Sodium- and chloride-dependent glycine transporter 1;Isoform GlyT-1B of Sodium- and chloride-dependent glycine transporter 1	SC6A9_MOUSE	4.71978	4.54561	0	4.41255	6.3617	5.13649	6.37499	6.2724	Enrich	1.68836	0.000449559	0.00165944	NotSig	0.678685	0.229235	0.32996	Enrich	inf	0.000152367	0.000651477	NotSig	1.92017	0.0482581	0.0878016	0.0546048	0.968087	0.973469	5.20988	-3.02606	5.09278e-19	1.56433	1.24071e-11
P28652	Camk2b	Calcium/calmodulin-dependent protein kinase type II subunit beta	KCC2B_MOUSE	4.30865	4.95142	4.93559	5.84726	7.51083	6.21057	8.00122	7.84697	Enrich	3.03318	0.00545697	0.0133274	NotSig	1.28783	0.0414112	0.120179	Enrich	3.01711	0.000644528	0.00175681	Enrich	1.95723	0.00301691	0.0207659	0.512654	0.0972771	0.164655	8.58635	1.81358	4.23845e-57	-1.43559	4.81601e-58
P28656	Nap1l1	Nucleosome assembly protein 1-like 1	NP1L1_MOUSE	0	0	0	0	7.02695	5.72638	6.67814	5.62562	Enrich	inf	2.07381e-05	0.0002268	Enrich	inf	4.49415e-05	0.00270019	Enrich	inf	0.000159767	0.000662731	NotSig	inf	0.0390889	0.076464	-0.303987	0.324336	0.416025	7.405	0.159803	7.53417e-05	-0.854125	4.24726e-13
P28658	Atxn10	Ataxin-10	ATX10_MOUSE	0	0	0.544493	0	5.93262	3.40108	3.51426	1.54114	Enrich	inf	2.62318e-06	0.000131159	NotSig	inf	0.0598636	0.145715	Enrich	3.56566	0.0119422	0.0213871	NotSig	inf	0.5	0.580066	-2.52952	1.25935e-06	0.000945862	8.26493	1.04086	3.57903e-31	0.149538	9.65858e-05
P28660	Nckap1	Nck-associated protein 1	NCKP1_MOUSE	4.73531	4.49353	5.15324	5.23379	6.33725	5.59827	7.52115	7.48502	Enrich	1.68932	0.00465567	0.0115332	NotSig	1.1753	0.0347636	0.104369	Enrich	2.38977	0.000161795	0.000668863	Enrich	2.22226	0.00156361	0.0155731	1.17195	0.0107277	0.036212	7.87821	0.374229	1.409e-15	-0.26517	0.455962
P28661;P28661-2;P28661-3;P28661-4;P28661-5	Septin4	Septin-4;Isoform 2 of Septin-4;Isoform 3 of Septin-4;Isoform 4 of Septin-4;Isoform 5 of Septin-4	SEPT4_MOUSE	7.21868	9.55687	5.08502	9.05605	8.88149	9.81872	7.33998	7.59169	NotSig	0.0545182	0.546126	0.597869	NotSig	-0.0688015	0.803945	0.836656	NotSig	-1.84426	0.49995	0.530458	NotSig	-1.53148	0.0185687	0.0533706	-1.90006	0.0724538	0.134296
P28663	Napb	Beta-soluble NSF attachment protein	SNAB_MOUSE	3.19687	4.67386	2.8438	4.56089	6.29649	5.37954	7.57704	6.4286	NotSig	2.43504	0.0652224	0.101391	NotSig	0.766679	0.0773538	0.162272	Enrich	4.26957	0.0147473	0.0256268	Enrich	1.91258	0.00859306	0.0362856	1.32038	0.00352613	0.0177241	9.75361	2.21122	1.28333e-130	1.58827	5.94284e-114
P28738	Kif5c	Kinesin heavy chain isoform 5C	KIF5C_MOUSE	3.29425	5.96917	5.70904	6.20505	6.22095	6.16649	8.00261	7.40409	NotSig	0.62308	0.222649	0.28665	NotSig	-1.80238	0.930886	0.948356	NotSig	0.552457	0.325729	0.370399	NotSig	-0.277393	0.467357	0.576962	1.78709	0.00070684	0.00725389	8.74864	1.36616	1.56515e-57	0.559499	1.14556e-17
P28740-2	Kif2a	Isoform 2 of Kinesin-like protein KIF2A	KIF2A_MOUSE	2.63312	4.92805	3.11674	4.4471	8.04679	6.77592	8.45747	8.02747	Enrich	5.03531	0.00841998	0.0192501	NotSig	1.54393	0.0675503	0.148745	Enrich	4.21217	0.0220522	0.0355437	Enrich	3.57554	0.000422354	0.0116899	0.43475	0.154433	0.236221	7.43718	0.210333	9.03469e-09	0.92548	2.76615e-15
P28798	Grn	Progranulin	GRN_MOUSE	0	0	0	7.41867	0.761301	2.28489	0	7.15757	NotSig	inf	0.391002	0.443422	NotSig	inf	0.181839	0.288495	NotSig				NotSig	-0.332625	0.387203	0.49801	#NAME?	0.391002	0.469332	4.61375	-1.64352	0.00319118	-1.98466	0.390612
P29341	Pabpc1	Polyadenylate-binding protein 1	PABP1_MOUSE	1.31442	2.57491	2.34381	4.76165	8.83998	7.20573	9.00071	7.97736	Enrich	5.6695	0.00952305	0.0212568	NotSig	3.09392	0.0520497	0.143177	Enrich	5.39404	0.0151194	0.0261784	Enrich	3.2598	0.0047634	0.0264101	0.144978	0.598452	0.665355	7.67733	-1.56832	4.54441e-12	-1.44135	1.32174e-35
P29416	Hexa	Beta-hexosaminidase subunit alpha	HEXA_MOUSE	0	0	1.52513	3.58487	0.965791	1.05547	0	3.35719	NotSig	inf	0.391002	0.443422	NotSig	inf	0.391002	0.454376	NotSig	#NAME?	0.391002	0.422677	NotSig	-0.325261	0.497466	0.580066	#NAME?	0.391002	0.469332	5.83219	-0.943477	0.178811	-0.647902	0.804029
P30275	Ckmt1	Creatine kinase U-type, mitochondrial	KCRU_MOUSE	7.39765	7.30882	7.22578	8.62756	10.6626	8.52704	8.6612	9.83081	Enrich	3.20664	0.000482156	0.0017478	NotSig	1.26651	0.0326378	0.100135	Enrich	1.36303	0.016874	0.0286289	NotSig	1.14381	0.0160159	0.0501607	-1.98427	0.000606957	0.0067559	6.36593	1.28809	1.29227e-11	-0.772914	3.99027e-08
P30416	Fkbp4	Peptidyl-prolyl cis-trans isomerase FKBP4	FKBP4_MOUSE	11.2842	12.0089	11.3429	10.9221	10.5166	10.7416	8.64212	9.4643	NotSig	-1.01096	0.261021	0.331398	NotSig	-1.38395	0.0380908	0.112564	NotSig	-2.21256	0.0674682	0.0916941	Deplete	-1.56276	0.0136764	0.0465764	-1.27225	0.156974	0.239727	6.87107	-0.400402	0.314625	0.641687	1.10034e-11
P30548	Tacr1	Substance-P receptor	NK1R_MOUSE	0	0	0	0	0	0	3.31486	0	NotSig				NotSig				Enrich	inf	0.00200427	0.00466363					inf	0.00200427	0.0123675	2.86334	3.92958	0.110081	-1.27404	1
P30681	Hmgb2	High mobility group protein B2	HMGB2_MOUSE	0	3.17123	5.19781	0	0	7.30459	2.95188	1.43448	NotSig				NotSig	1.26658	0.12654	0.234235	NotSig	-2.26323	0.13099	0.163254	NotSig	inf	0.5	0.580066	inf	0.0607152	0.119125	1.79634	-3.68858	0.000758035	-4.62268	0.00100267
P30999;P30999-2;P30999-3	Ctnnd1	Catenin delta-1;Isoform 2 of Catenin delta-1;Isoform 3 of Catenin delta-1	CTND1_MOUSE	12.3554	13.0739	12.1152	12.9432	10.6666	11.4806	9.71108	11.7138	NotSig	-2.06067	0.105474	0.15412	Deplete	-1.66465	0.0128355	0.0485666	NotSig	-2.70861	0.0407893	0.0600741	NotSig	-1.49115	0.0981035	0.153632	-0.943347	0.100897	0.169253	3.81728	-2.03788	0.0208898	0.229066	0.0698878
P31324	Prkar2b	cAMP-dependent protein kinase type II-beta regulatory subunit	KAP3_MOUSE	0	0.73311	3.03892	4.08865	6.7372	4.50652	7.47482	7.37199	Enrich	inf	2.63511e-05	0.000259465	Enrich	3.97461	0.00711716	0.030098	Enrich	3.95339	0.0199643	0.0327114	Enrich	3.31526	0.0011398	0.0146456	0.758309	0.0294416	0.0710625	6.13469	2.21328	5.84883e-14	-1.099	4.07035e-19
P31648	Slc6a1	Sodium- and chloride-dependent GABA transporter 1	SC6A1_MOUSE	5.09614	5.0325	3.92611	6.57054	6.89733	6.38053	9.16879	8.91822	Enrich	1.72247	0.00948207	0.0211998	NotSig	1.39553	0.0752733	0.15969	Enrich	5.05992	0.00214765	0.00496105	Enrich	2.31664	0.000630416	0.0131267	2.29613	0.000146319	0.00357201	6.64395	-2.02527	0.00379034	-0.133999	0.065499
P31650	Slc6a11	Sodium- and chloride-dependent GABA transporter 3	S6A11_MOUSE	9.04464	8.89618	5.79432	9.56404	10.5451	9.60581	9.72973	10.644	NotSig	1.36348	0.0288026	0.0538091	NotSig	0.743013	0.14882	0.266215	Enrich	3.85125	0.00100369	0.00255962	NotSig	1.07034	0.039652	0.0771896	-0.743256	0.0692229	0.130509	5.70783	-3.552	7.61676e-14	0.765695	2.09319e-14
P31725	S100a9	Protein S100-A9	S10A9_MOUSE	0	1.4657	0.744459	0	0	2.46594	0	0	NotSig				NotSig	0.192861	0.644594	0.690544	NotSig	#NAME?	0.391002	0.422677								0			#NAME?	0.390612
P31750	Akt1	RAC-alpha serine/threonine-protein kinase	AKT1_MOUSE	0	0	0	0	0	0	4.88375	4.09728	NotSig				NotSig				Enrich	inf	5.66202e-05	0.000569659	NotSig	inf	0.0666174	0.112133	inf	5.66202e-05	0.00241353	6.24819	0.648512	6.83925e-05	0.912212	4.73029e-07
P31786	Dbi	Acyl-CoA-binding protein	ACBP_MOUSE	0	3.34824	4.98224	3.16319	1.14739	7.6873	5.26577	9.06819	NotSig	inf	0.391002	0.443422	NotSig	1.88446	0.112277	0.213785	NotSig	2.02649	0.925194	0.931362	NotSig	3.58413	0.0488191	0.0884787	5.71691	0.185361	0.27175	6.33112	-4.45523	1.86843e-122	-3.66494	7.30422e-44
P31938	Map2k1	Dual specificity mitogen-activated protein kinase kinase 1	MP2K1_MOUSE	4.51509	4.8998	4.95668	5.07886	7.67316	7.24226	9.27193	8.93044	Enrich	2.89767	0.011525	0.0248384	Enrich	2.35758	0.00175341	0.0103175	Enrich	4.21918	0.000739427	0.00197068	Enrich	3.82545	0.000229632	0.0113696	1.64192	0.00295595	0.0157252	6.73515	1.07248	6.5164e-09	-1.26143	1.10344e-22
P32037	Slc2a3	Solute carrier family 2, facilitated glucose transporter member 3	GTR3_MOUSE	4.63257	5.46749	5.43367	6.81134	5.9473	6.61287	8.34595	8.10951	Enrich	1.30853	0.00695276	0.0162724	NotSig	1.17252	0.0150996	0.0555779	Enrich	2.89874	0.000231882	0.00081394	Enrich	1.30413	0.0123432	0.04454	2.43064	5.14966e-05	0.00241353	6.41638	1.14033	4.35334e-10	0.72496	1.6521e-05
P32211	Chrm4	Muscarinic acetylcholine receptor M4	ACM4_MOUSE	0	0	0	0	0	0	3.93221	3.39297	NotSig				NotSig				Enrich	inf	0.000749295	0.00199049	NotSig	inf	0.0513621	0.0912635	inf	0.000749295	0.00744904	0			#NAME?	0.0105458
P32921;P32921-2	Wars1	Tryptophan--tRNA ligase, cytoplasmic;Isoform 2 of Tryptophan--tRNA ligase, cytoplasmic	SYWC_MOUSE	0	0	0	0	5.55533	4.75475	5.93961	6.23243	Enrich	inf	5.44101e-05	0.000381588	Enrich	inf	0.000431214	0.00456675	Enrich	inf	0.000140628	0.000633111	NotSig	inf	0.0176531	0.0522593	0.419322	0.23615	0.324356
P33173	Kif1a	Kinesin-like protein KIF1A	KIF1A_MOUSE	0	0	0	1.17504	6.9807	6.00701	6.53494	6.19474	Enrich	inf	4.3996e-05	0.000346359	Enrich	inf	0.000516969	0.00491121	Enrich	inf	7.59761e-05	0.000569659	Enrich	4.8852	0.00684134	0.0318922	-0.439049	0.169527	0.254437	9.46349	1.12993	9.30967e-50	2.19195	1.20877e-143
P33175	Kif5a	Kinesin heavy chain isoform 5A	KIF5A_MOUSE	0	0	1.16657	1.17035	5.46312	5.25393	6.14335	5.92248	Enrich	inf	4.10066e-05	0.000334623	Enrich	inf	0.000676188	0.0056033	Enrich	3.56162	0.0217139	0.0351564	NotSig	3.28577	0.0255201	0.0610527	0.718798	0.0435596	0.0945698	9.19829	0.973024	1.80331e-58	1.91792	8.94712e-120
P34022	Ranbp1	Ran-specific GTPase-activating protein	RANG_MOUSE	0	1.17311	0	1.3658	5.4031	4.95481	6.34223	6.49129	Enrich	inf	1.12648e-05	0.000183664	NotSig	2.35399	0.0450361	0.128056	Enrich	inf	0.000235533	0.000819082	Enrich	4.98034	0.00609655	0.0298042	1.02949	0.0473563	0.100623	6.07885	-1.51297	0.00056167	-1.62269	1.18105e-15
P34152;P34152-2;P34152-4	Ptk2	Focal adhesion kinase 1;Isoform 2 of Focal adhesion kinase 1;Isoform 4 of Focal adhesion kinase 1	FAK1_MOUSE	1.1068	0	2.32521	2.34327	5.40116	4.77506	6.36376	5.68019	NotSig	3.04182	0.0285502	0.0533739	Enrich	inf	2.691e-05	0.00270019	NotSig	2.78779	0.0556858	0.0788172	NotSig	2.02291	0.0902435	0.1434	0.989147	0.0144382	0.0437464	5.05333	-1.14071	0.125639	-0.336282	0.502045
P34884	Mif	Macrophage migration inhibitory factor	MIF_MOUSE	6.38943	7.07777	6.94748	6.98179	8.11356	8.14684	10.3944	9.64706	Enrich	1.60227	0.0188136	0.037518	NotSig	1.02519	0.0302767	0.0941941	Enrich	3.38794	0.000577598	0.00160419	Enrich	2.63226	0.00309476	0.0210083	2.31276	0.000629257	0.00682048	7.76085	-0.353419	0.761221	0.088163	0.00324393
P35123	Usp4	Ubiquitin carboxyl-terminal hydrolase 4	UBP4_MOUSE	0	0	0	0	1.0756	0	5.0691	4.0101	NotSig	inf	0.391002	0.443422	NotSig				Enrich	inf	0.00011571	0.000599543	NotSig	inf	0.0671827	0.113017	2.83682	0.0319353	0.0754273	5.42912	0.168463	0.476602	-0.451691	0.0034204
P35235	Ptpn11	Tyrosine-protein phosphatase non-receptor type 11	PTN11_MOUSE	1.54134	2.79978	0.902771	3.85082	6.71652	5.88916	7.64011	7.01977	Enrich	4.74359	0.00992914	0.0219495	NotSig	2.69796	0.0420041	0.121343	Enrich	6.17926	0.00401152	0.00857605	Enrich	3.1747	0.000691848	0.0131974	0.948112	0.0079239	0.0296151	6.36856	-1.1685	0.00267527	-0.366177	0.363148
P35242	Sftpa1	Pulmonary surfactant-associated protein A	SFTPA_MOUSE	0	2.61226	1.19014	0	0	6.18609	1.75619	2.05389	NotSig				NotSig	1.35593	0.117347	0.220753	NotSig	0.130772	0.740814	0.762337	NotSig	inf	0.5	0.580066	inf	0.214503	0.301932
P35276	Rab3d	Ras-related protein Rab-3D	RAB3D_MOUSE	6.59523	6.76228	6.49532	7.75381	8.71494	8.32624	10.9801	11.1163	Enrich	1.98785	0.0101347	0.0223141	Enrich	1.54321	0.00924477	0.0369236	Enrich	4.45213	5.13607e-05	0.000569659	Enrich	3.34749	0.000293634	0.0113696	2.29372	0.000297905	0.0049265	3.72959	-0.39125	0.277135	1.1606	0.135034
P35278	Rab5c	Ras-related protein Rab-5C	RAB5C_MOUSE	0.915084	0	1.27428	3.7859	7.16261	5.11991	7.17729	6.67707	Enrich	5.6406	0.0054711	0.0133382	Enrich	inf	0.00324716	0.0162796	Enrich	4.13105	0.0183189	0.0305742	Enrich	2.90975	0.012692	0.0451611	0.0033397	0.948101	0.957612	6.09173	-0.876197	0.334521	-0.106965	0.0796574
P35279	Rab6a	Ras-related protein Rab-6A	RAB6A_MOUSE	1.49151	1.28827	2.30139	4.78172	8.82594	8.293	10.2275	9.15894	Enrich	4.93127	0.0149813	0.0309066	Enrich	5.22561	0.0110795	0.0428365	Enrich	6.63141	0.00862347	0.016439	Enrich	4.40032	0.00017882	0.0113696	1.40666	0.00537996	0.0229102	8.99009	0.010354	1.40186e-08	0.500053	1.45688e-16
P35282	Rab21	Ras-related protein Rab-21	RAB21_MOUSE	0.843827	0	1.10828	3.59548	5.36333	4.16926	5.95561	6.15791	Enrich	4.10169	0.012551	0.0265502	Enrich	inf	7.29401e-05	0.00287315	Enrich	3.63218	0.0191956	0.0317541	Enrich	2.56693	0.00313517	0.0210083	0.666117	0.10636	0.176192	5.78916	0.084662	0.00200071	1.4148	3.54818e-11
P35283	Rab12	Ras-related protein Rab-12	RAB12_MOUSE	1.93188	1.63433	1.52357	4.17799	5.04821	4.64043	4.94604	5.15643	NotSig	2.20557	0.0686974	0.105659	NotSig	2.49877	0.0476004	0.133422	Enrich	2.97066	0.030995	0.047809	Enrich	0.976835	0.0125994	0.0451172	-0.119326	0.590371	0.658395	6.50592	0.013948	0.072141	-0.151733	0.400736
P35290	Rab24	Ras-related protein Rab-24	RAB24_MOUSE	0	0	0	0	5.59166	2.38695	5.51684	5.45056	Enrich	inf	5.84299e-06	0.000146663	NotSig	inf	0.182033	0.288495	Enrich	inf	0.000279801	0.000928034	Enrich	inf	0.0072356	0.0331258	-0.00340718	0.81014	0.849198	5.53677	0.026522	0.364216	-0.335025	0.0789874
P35293	Rab18	Ras-related protein Rab-18	RAB18_MOUSE	0	0	0	1.40507	5.98287	3.13544	4.8336	5.21469	Enrich	inf	7.99756e-05	0.000475017	NotSig	inf	0.0630895	0.145715	Enrich	inf	2.50652e-05	0.000569659	NotSig	3.56074	0.0168944	0.0512299	-1.20792	0.00467951	0.0209961
P35438;P35438-2	Grin1	Glutamate receptor ionotropic, NMDA 1;Isoform 2 of Glutamate receptor ionotropic, NMDA 1	NMDZ1_MOUSE	0	0	0	4.80044	4.91983	1.13201	5.20111	5.46201	Enrich	inf	0.000197338	0.000850418	NotSig	inf	0.391002	0.454376	Enrich	inf	0.000139157	0.000630712	NotSig	0.643434	0.0355284	0.0725275	0.284407	0.388922	0.469332	7.5013	0.879877	2.6996e-18	0.060273	0.251463
P35486	Pdha1	Pyruvate dehydrogenase E1 component subunit alpha, somatic form, mitochondrial	ODPA_MOUSE	6.46946	6.81488	6.28027	8.18511	7.60443	7.3668	8.19886	9.1996	NotSig	1.0075	0.0634465	0.0994743	NotSig	0.571715	0.21294	0.31105	Enrich	1.74794	0.0229582	0.0368179	NotSig	0.954692	0.025235	0.0606287	0.604916	0.0657222	0.125794	6.56324	0.371672	0.0124945	-0.655975	0.00116734
P35492	Hal	Histidine ammonia-lyase	HUTH_MOUSE	6.20512	3.74057	6.17192	5.63637	6.14398	4.98251	5.30808	5.1824	NotSig	-0.175801	0.886654	0.907477	NotSig	0.458956	0.410079	0.471192	NotSig	-0.895351	0.138496	0.171417	NotSig	-1.09593	0.690968	0.747618	-0.755561	0.0895143	0.15503	0.878137	0.019823	0.646818	10.8847	0.229712
P35546	Ret	Proto-oncogene tyrosine-protein kinase receptor Ret	RET_MOUSE	1.11615	1.27433	2.46503	6.32704	5.82479	5.64155	8.56148	7.64022	Enrich	3.46978	0.0213932	0.0417244	NotSig	2.70758	0.0362469	0.108577	Enrich	4.70593	0.0218087	0.03529	NotSig	1.24686	0.11403	0.17468	2.75756	0.000284802	0.00476426	10.2243	5.38172	2.73163e-267	10.0556	0
P35564	Canx	Calnexin	CALX_MOUSE	6.06243	6.35715	5.56418	9.39384	8.44376	6.96989	6.63505	9.25138	Enrich	2.25913	0.00635285	0.0151675	NotSig	0.747985	0.23199	0.333563	Enrich	1.13146	0.0148702	0.0258248	NotSig	-0.188719	0.698127	0.753913	-1.7962	0.00127705	0.00972575	9.67622	-0.050106	6.28944e-05	0.611965	4.80521e-41
P35585	Ap1m1	AP-1 complex subunit mu-1	AP1M1_MOUSE	0	0	0	0	4.43991	2.63943	5.34372	5.31617	Enrich	inf	0.000177092	0.000796153	NotSig	inf	0.0579897	0.145715	Enrich	inf	4.31554e-05	0.000569659	NotSig	inf	0.0317094	0.0686183	0.919835	0.010736	0.036212	6.08013	1.44296	5.07516e-08	0.896779	2.25483e-06
P35700	Prdx1	Peroxiredoxin-1	PRDX1_MOUSE	6.55008	6.11415	6.86725	6.61535	8.83871	7.99725	9.71543	9.21263	Enrich	2.31103	0.000121866	0.000609331	Enrich	1.81213	0.00538622	0.0244276	Enrich	2.77353	0.000875934	0.00227838	Enrich	2.37609	0.00863043	0.0362856	0.867015	0.0146303	0.0439687	6.39565	-3.21141	1.35816e-61	-2.28884	3.0524e-31
P35762	Cd81	CD81 antigen	CD81_MOUSE	5.32161	6.26312	4.45175	6.74098	6.80522	7.40206	8.96258	8.10947	NotSig	0.312102	0.241538	0.308514	NotSig	0.445534	0.26823	0.37572	NotSig	2.95896	0.0687324	0.0931916	NotSig	1.37812	0.381706	0.494004	2.43233	0.0189226	0.0530125	7.89109	-3.41373	5.4415e-115	-1.96677	7.83357e-16
P35802	Gpm6a	Neuronal membrane glycoprotein M6-a	GPM6A_MOUSE	5.87982	6.41216	5.73818	7.9111	7.75218	8.41592	10.746	9.67284	NotSig	1.2111	0.0978508	0.144129	NotSig	1.77145	0.0226721	0.0767013	Enrich	4.50517	0.00585738	0.0118427	Enrich	1.69341	0.00730299	0.0332718	2.98784	1.70912e-05	0.00215051	7.88084	0.575467	1.88637e-16	-1.70268	3.41819e-71
P35803;P35803-8	Gpm6b	Neuronal membrane glycoprotein M6-b;Isoform 8 of Neuronal membrane glycoprotein M6-b	GPM6B_MOUSE	7.20273	7.38432	6.60035	7.81212	6.71283	7.20215	9.3287	8.37242	NotSig	-0.963898	0.513926	0.566158	NotSig	-0.508938	0.820348	0.852393	NotSig	2.2378	0.037482	0.0560667	NotSig	0.619548	0.486235	0.580066	2.89602	0.0105746	0.0359189	6.74287	-4.0162	5.83237e-114	-3.26731	5.16292e-172
P35803-2;P35803-4	Gpm6b	Isoform 2 of Neuronal membrane glycoprotein M6-b;Isoform 4 of Neuronal membrane glycoprotein M6-b	GPM6B_MOUSE	0	0	0	0	0	0	0.145229	0	NotSig				NotSig				NotSig	inf	0.391002	0.422677					inf	0.391002	0.469332	6.74287	-4.0162	5.83237e-114	-3.26731	5.16292e-172
P35922;P35922-2;P35922-3;P35922-7;P35922-8;P35922-9	Fmr1	Synaptic functional regulator FMR1;Isoform 2 of Synaptic functional regulator FMR1;Isoform 3 of Synaptic functional regulator FMR1;Isoform 7 of Synaptic functional regulator FMR1;Isoform 8 of Synaptic functional regulator FMR1;Isoform 9 of Synaptic functional regulator FMR1	FMR1_MOUSE	0	0	0	0	3.96466	0.456909	0.346366	0	Enrich	inf	0.000194197	0.000844911	NotSig	inf	0.391002	0.454376	NotSig	inf	0.391002	0.422677					-5.2142	0.000434193	0.00577711	5.40743	-0.57806	0.858839	-0.849844	5.24509e-05
P35979	Rpl12	60S ribosomal protein L12	RL12_MOUSE	2.48777	3.40952	4.13194	2.92662	6.82713	5.59307	5.57335	5.19154	NotSig	1.70319	0.0811393	0.121931	NotSig	1.39184	0.160379	0.281553	NotSig	0.386601	0.391208	0.42274	NotSig	0.828955	0.173207	0.253058	-1.29392	0.0332189	0.0776234	1.78276	#NAME?	0.00270216	-0.744822	0.16998
P35980	Rpl18	60S ribosomal protein L18	RL18_MOUSE	8.15899	8.48974	8.69555	7.90254	7.95311	9.84892	9.33293	8.80069	NotSig	-0.266911	0.626082	0.674657	NotSig	1.30037	0.0440573	0.126149	NotSig	0.260945	0.427014	0.457812	NotSig	0.802752	0.0772057	0.126104	1.3561	0.00254682	0.0143955	5.29154	-1.98297	2.21061e-09	-0.49857	0.485092
P36536	Sar1a	GTP-binding protein SAR1a	SAR1A_MOUSE	1.32492	1.40303	2.2925	5.0386	7.73564	6.27972	7.26496	6.53599	Enrich	4.49897	0.0158996	0.0326055	NotSig	2.68829	0.0398322	0.116689	NotSig	3.67226	0.0332604	0.0506228	Enrich	1.49334	0.00313488	0.0210083	-0.491743	0.0767333	0.139293	6.8575	-0.174661	0.0228701	0.198685	0.0399332
P36916	Gnl1	Guanine nucleotide-binding protein-like 1	GNL1_MOUSE	2.8511	2.38801	1.5406	3.31928	7.24221	5.86943	7.65892	6.75557	Enrich	3.93894	0.0190756	0.0378485	NotSig	3.24408	0.0195586	0.0681861	Enrich	5.70748	0.00518733	0.0106837	Enrich	3.49855	0.000383357	0.0114913	0.45644	0.151023	0.231863	6.20873	0.439605	0.000840639	-0.381538	0.00313471
P37040	Por	NADPH--cytochrome P450 reductase	NCPR_MOUSE	0	0	0.772015	1.10321	7.05268	3.87997	6.08275	5.62433	Enrich	inf	7.40939e-06	0.000157952	NotSig	inf	0.0616836	0.145715	Enrich	5.18623	0.0048804	0.0101097	NotSig	3.25131	0.0262804	0.0619352	-0.959097	0.00594489	0.024369	6.0108	-0.221791	0.0509056	-0.359677	0.324383
P38647	Hspa9	Stress-70 protein, mitochondrial	GRP75_MOUSE	6.14444	6.41586	6.06445	6.82678	8.8282	7.94175	9.40809	7.92926	Enrich	2.72362	0.00169587	0.00493508	Enrich	1.57177	0.00525368	0.0239294	Enrich	3.29793	0.000530209	0.00150611	NotSig	1.22696	0.467338	0.576962	0.512311	0.237999	0.326122	7.91426	0.147164	6.75566e-05	0.029695	0.0244232
P39053;P39053-4;P39053-5	Dnm1	Dynamin-1;Isoform 4 of Dynamin-1;Isoform 5 of Dynamin-1	DYN1_MOUSE	6.55855	6.67149	6.10195	7.01011	9.71609	8.46137	10.9382	10.7577	Enrich	2.98158	0.00354058	0.00922026	NotSig	1.82219	0.0154398	0.0564147	Enrich	4.78091	8.32192e-05	0.000574046	Enrich	3.7228	7.42062e-05	0.0113696	1.24369	0.00268123	0.0149319	9.41245	1.8728	4.35967e-99	2.04147	1.49283e-134
P39053-3	Dnm1	Isoform 3 of Dynamin-1	DYN1_MOUSE	0	2.52731	3.42159	5.45316	6.5977	6.00071	8.4784	8.86087	Enrich	inf	1.41746e-05	0.000201239	NotSig	2.39454	0.0945946	0.187499	Enrich	4.30398	0.0220376	0.03554	Enrich	3.37984	0.00693374	0.0322695	1.90428	0.000151605	0.00359757	9.41245	1.8728	4.35967e-99	2.04147	1.49283e-134
P39054;P39054-2	Dnm2	Dynamin-2;Isoform 2 of Dynamin-2	DYN2_MOUSE	0	0	0.746783	0	1.85436	0.684029	3.69431	4.12355	NotSig	inf	0.0659439	0.102224	NotSig	inf	0.391002	0.454376	Enrich	2.84346	0.0243559	0.0386916	Enrich	inf	0.0104991	0.0410471	1.78854	0.0613058	0.120002	4.77886	-2.28161	1.59538e-08	-0.385678	0.101213
P39688	Fyn	Tyrosine-protein kinase Fyn	FYN_MOUSE	1.2015	1.88049	2.17308	4.45494	5.59712	5.22222	7.42612	6.58288	NotSig	2.82613	0.034688	0.0630482	NotSig	2.5513	0.0521238	0.143233	Enrich	4.19291	0.0229218	0.0367801	Enrich	2.1123	0.00310485	0.0210083	1.88681	0.00138231	0.0101963	6.20486	-1.42339	0.0216753	-0.320722	0.530034
P40124	Cap1	Adenylyl cyclase-associated protein 1	CAP1_MOUSE	6.22452	6.29044	5.21597	5.82332	7.55713	7.58863	7.87118	7.42857	NotSig	1.05176	0.0965418	0.142354	NotSig	0.798517	0.225869	0.326173	Enrich	2.4325	0.00949169	0.0177985	Enrich	1.59125	0.00170036	0.0158636	0.361986	0.29505	0.386893	6.08678	-0.623601	0.307414	-1.51562	2.46399e-27
P40142	Tkt	Transketolase	TKT_MOUSE	6.11828	6.00986	6.136	5.86626	8.28499	7.88341	8.96032	8.67593	Enrich	2.14805	0.000593337	0.00207592	Enrich	1.87337	0.00072129	0.00583171	Enrich	2.82529	9.34504e-05	0.000590983	Enrich	2.70098	0.00252779	0.0192564	0.706416	0.0365206	0.0828296	6.70549	-1.49346	2.23045e-09	-0.289807	0.0547974
P40237	Cd82	CD82 antigen	CD82_MOUSE	4.12773	2.08216	1.51981	4.046	5.14399	4.76899	6.75478	5.44244	NotSig	1.00541	0.100886	0.148046	NotSig	1.78664	0.114374	0.217155	Enrich	4.96219	0.00664094	0.013149	NotSig	1.37775	0.0497586	0.0894319	1.5979	0.0106419	0.0360208	0.877843	#NAME?	7.61857e-30	-5.21269	0.00408886
P40240	Cd9	CD9 antigen	CD9_MOUSE	3.13895	4.95424	3.03898	6.1643	2.99982	5.31634	7.03841	6.68037	NotSig	-1.32027	0.959961	0.966993	NotSig	0.0757494	0.89251	0.916153	NotSig	2.80663	0.131839	0.16424	NotSig	0.858722	0.77879	0.82084	3.5653	0.111918	0.183507	3.61129	-5.16972	4.75087e-54	-4.52979	1.15264e-20
P40336;P40336-2	Vps26a	Vacuolar protein sorting-associated protein 26A;Isoform 2 of Vacuolar protein sorting-associated protein 26A	VP26A_MOUSE	2.62017	0	1.14883	1.02726	5.70575	1.92397	5.11914	5.57399	NotSig	2.7188	0.038917	0.0697211	NotSig	inf	0.181697	0.288495	NotSig	2.55546	0.0400758	0.0591752	NotSig	3.5444	0.0184868	0.0532355	-0.593683	0.00644212	0.0256444	5.44938	-0.046935	0.519787	0.033946	0.195712
P40694	Ighmbp2	DNA-binding protein SMUBP-2	SMBP2_MOUSE	1.08795	0	0.752792	2.15523	5.41364	5.37358	9.01048	7.81495	Enrich	3.16777	0.0251734	0.0481411	Enrich	inf	0.000211937	0.00329892	Enrich	8.22288	0.00102678	0.00260924	Enrich	5.55583	0.00389152	0.0233741	3.59588	5.55028e-05	0.00241353	3.94598	1.71796	0.0170203	0.280746	0.630749
P41105	Rpl28	60S ribosomal protein L28	RL28_MOUSE	7.44927	7.74262	7.3555	6.78859	7.36891	8.1862	6.88477	6.84978	NotSig	-0.212373	0.852749	0.879617	NotSig	0.347064	0.31872	0.435437	NotSig	-0.556212	0.327542	0.372313	NotSig	-0.0434776	0.861839	0.891579	-0.455768	0.101179	0.169451	1.42009	-1.79513	0.774985	0.973128	1
P41216	Acsl1	Long-chain-fatty-acid--CoA ligase 1	ACSL1_MOUSE	0.728415	0.80794	1.84648	4.05252	4.94091	3.29852	4.35217	4.89943	Enrich	4.20432	0.00900846	0.0203393	NotSig	2.84837	0.122428	0.228078	NotSig	1.65145	0.102403	0.131687	NotSig	0.57147	0.196731	0.28186	-0.628013	0.0140588	0.0428728	4.52951	-0.931244	0.0216089	-0.049917	1
P41241	Csk	Tyrosine-protein kinase CSK	CSK_MOUSE	0	0	0.98023	0	4.75578	3.2705	5.74968	5.12397	Enrich	inf	4.11762e-05	0.000335011	NotSig	inf	0.0589142	0.145715	Enrich	3.95925	0.0137489	0.02417	NotSig	inf	0.0347438	0.0716243	1.06314	0.0188937	0.0529828	6.31177	0.667238	8.77502e-07	1.812	2.09443e-26
P42225	Stat1	Signal transducer and activator of transcription 1	STAT1_MOUSE	0	0	0	0	5.68484	2.25684	5.81931	4.3275	Enrich	inf	0.00437067	0.0109665	NotSig	inf	0.193717	0.291617	Enrich	inf	0.000434261	0.00128047	NotSig	inf	0.0791382	0.128588	-0.419823	0.874743	0.899533	3.94047	-1.01461	0.100075	-1.02957	0.509062
P42227;P42227-2;P42227-3	Stat3	Signal transducer and activator of transcription 3;Isoform Stat3B of Signal transducer and activator of transcription 3;Isoform Del-701 of Signal transducer and activator of transcription 3	STAT3_MOUSE	0	0	0	0	3.53312	1.48616	4.15094	3.66917	Enrich	inf	0.000666565	0.0022856	NotSig	inf	0.192763	0.290793	Enrich	inf	0.000351394	0.00108989	NotSig	inf	0.0571055	0.0989054	0.649714	0.109084	0.17988	6.33505	-0.469415	0.113724	1.00257	3.12452e-14
P42232	Stat5b	Signal transducer and activator of transcription 5B	STA5B_MOUSE	0	0	1.11594	0.892765	5.46587	4.73047	6.18965	5.32131	Enrich	inf	5.55846e-06	0.000146663	Enrich	inf	0.000312497	0.00392606	Enrich	3.8386	0.0171016	0.0289296	Enrich	3.84152	0.0155451	0.0494166	0.796783	0.067702	0.128797	6.04238	2.27634	1.2448e-09	2.16214	5.37134e-18
P42567	Eps15	Epidermal growth factor receptor substrate 15	EPS15_MOUSE	3.93623	0.986866	2.72225	4.5779	4.91952	4.51713	5.79284	5.55402	NotSig	0.0411351	0.512319	0.56468	NotSig	2.71284	0.0316788	0.0976427	NotSig	1.30098	0.14788	0.181699	NotSig	0.832987	0.0961205	0.150973	0.938164	0.0249782	0.0636048	6.73351	-1.00214	0.0964849	0.485157	9.13848e-10
P42669	Pura	Transcriptional activator protein Pur-alpha	PURA_MOUSE	5.09058	5.11747	5.00772	4.38249	9.04798	6.78736	6.91805	7.38713	Enrich	4.03459	4.58146e-05	0.000349003	NotSig	1.93733	0.0410558	0.119615	Enrich	1.99315	0.0142639	0.0249532	Enrich	2.92181	0.00329801	0.02146	-2.02358	0.0100123	0.0347848	10.3208	0.786293	4.40029e-59	1.44835	9.27105e-137
P42859;P42859-2	Htt	Huntingtin;Isoform Short of Huntingtin	HD_MOUSE	0	0	0	0.761906	4.103	1.67759	4.50211	4.74342	Enrich	inf	0.00132651	0.0040353	NotSig	inf	0.187936	0.288766	Enrich	inf	0.000336577	0.00105998	Enrich	3.82971	0.0130034	0.0456925	0.357472	0.387889	0.469332	6.37496	1.24782	8.72558e-11	1.58038	7.29769e-15
P42867	Dpagt1	UDP-N-acetylglucosamine--dolichyl-phosphate N-acetylglucosaminephosphotransferase	GPT_MOUSE	1.07677	0.898956	1.08508	2.01957	0	0	1.6744	3.38502	NotSig	#NAME?	0.391002	0.443422	NotSig	#NAME?	0.391002	0.454376	NotSig	2.41636	0.779273	0.797906	NotSig	0.264319	0.376042	0.488021	inf	0.391002	0.469332	3.88015	-0.216231	0.277126	-0.210081	0.276525
P42925	Pxmp2	Peroxisomal membrane protein 2	PXMP2_MOUSE	0	0	0	0.898027	0	0	1.43369	2.30942	NotSig				NotSig				NotSig	inf	0.391002	0.422677	NotSig	2.09167	0.650813	0.714804	inf	0.391002	0.469332	1.29992	-2.11114	0.0677588	-3.70437	0.016109
P42932	Cct8	T-complex protein 1 subunit theta	TCPQ_MOUSE	4.55741	4.4539	4.36317	4.34427	8.88316	7.15046	9.09866	8.25344	Enrich	4.21945	0.0017242	0.00501222	Enrich	2.79424	0.000355053	0.00421626	Enrich	4.80983	4.42543e-06	0.000452653	Enrich	3.93487	0.00322495	0.0210822	0.252703	0.423702	0.498859	7.91415	0.793439	8.02894e-14	0.417486	4.44228e-08
P43006	Slc1a2	Excitatory amino acid transporter 2	EAA2_MOUSE	6.88776	7.0329	6.62733	9.96694	7.76298	7.84229	10.2868	10.657	NotSig	0.825151	0.077863	0.117844	NotSig	0.877926	0.0792453	0.165198	Enrich	3.54381	0.00122925	0.00304289	NotSig	0.667524	0.0190487	0.0538618	2.51815	0.000140041	0.00352128	8.47659	-1.87691	0.182084	-1.05979	4.04945e-27
P43024	Cox6a1	Cytochrome c oxidase subunit 6A1, mitochondrial	CX6A1_MOUSE	0	0	0	0	0	0	1.01861	1.96884	NotSig				NotSig				NotSig	inf	0.391002	0.422677	NotSig	inf	0.5	0.580066	inf	0.391002	0.469332	7.37513	-2.27854	6.31496e-45	-1.89119	1.81643e-57
P43274	H1-4	Histone H1.4	H14_MOUSE	9.70573	10.14	8.36467	9.05509	10.1139	10.7111	8.62956	8.59276	NotSig	0.347885	0.359653	0.440162	NotSig	0.480638	0.180232	0.288495	NotSig	0.555706	0.738308	0.760577	NotSig	-0.623259	0.325133	0.432947	-1.16922	0.114017	0.185477
P43276	H1-5	Histone H1.5	H15_MOUSE	3.37493	6.07539	4.8064	4.60783	5.54835	7.11989	4.11821	3.99381	NotSig	1.44343	0.155746	0.217413	NotSig	0.786383	0.274651	0.383703	NotSig	-0.776292	0.440475	0.471539	NotSig	-0.73858	0.11755	0.179388	-1.2265	0.0920747	0.158704
P43277	H1-3	Histone H1.3	H13_MOUSE	9.09457	9.55871	8.30327	9.03824	9.61077	10.1509	8.40386	8.52369	NotSig	0.472933	0.196032	0.256954	NotSig	0.476886	0.275565	0.384576	NotSig	0.294627	0.889571	0.899288	NotSig	-0.677781	0.271545	0.371367	-0.955883	0.13796	0.216399
P43407	Sdc2	Syndecan-2	SDC2_MOUSE	0	0	0	0	2.06834	3.08732	5.26124	3.95821	NotSig	inf	0.0701032	0.10752	Enrich	inf	0.000145768	0.00302923	Enrich	inf	0.000698798	0.00188072	NotSig	inf	0.0239499	0.059246	3.08352	0.0159854	0.0467762	7.55768	0.620399	1.58917e-22	0.819508	1.48435e-16
P45376	Akr1b1	Aldo-keto reductase family 1 member B1	ALDR_MOUSE	3.09789	4.23261	2.31537	4.21569	6.65488	6.10497	8.27062	7.89566	NotSig	2.89694	0.0446098	0.07874	Enrich	1.86064	0.00551623	0.0248698	Enrich	4.73097	0.0194753	0.0320015	Enrich	3.73856	0.00226086	0.0177712	1.67687	0.00564602	0.0236806
P45878	Fkbp2	Peptidyl-prolyl cis-trans isomerase FKBP2	FKBP2_MOUSE	0	0	0	5.30198	0	0	0	5.72889	NotSig				NotSig				NotSig				NotSig	0.380846	0.225826	0.315819
P46061	Rangap1	Ran GTPase-activating protein 1	RAGP1_MOUSE	7.34584	3.55196	0	3.20405	7.18396	5.41858	5.54897	6.71956	NotSig	-2.70466	0.952923	0.963079	NotSig	-2.69338	0.496875	0.550933	Enrich	inf	2.33511e-05	0.000569659	NotSig	1.36839	0.264709	0.363329	-1.64196	0.000350508	0.00533879	9.47835	2.10658	5.25176e-105	2.16819	1.64404e-144
P46096	Syt1	Synaptotagmin-1	SYT1_MOUSE	5.777	6.03886	5.8796	6.96101	7.85632	8.2874	11.3377	10.9135	Enrich	2.01921	0.00428109	0.0107713	Enrich	2.31981	0.0021022	0.0117723	Enrich	5.47306	2.10372e-06	0.000366048	Enrich	3.8847	0.000835708	0.0133755	3.52133	0.00011151	0.00310375	12.2814	3.59425	0	2.16844	0
P46414	Cdkn1b	Cyclin-dependent kinase inhibitor 1B	CDN1B_MOUSE	0	1.01936	0.938643	0	3.60716	4.41589	3.78097	3.15041	Enrich	inf	0.000194796	0.000844911	NotSig	2.51055	0.0381277	0.112564	NotSig	2.11187	0.0508939	0.072789	NotSig	inf	0.0184455	0.0532355	0.243119	0.627533	0.69184	5.29292	-1.21912	0.000720078	-1.2276	0.000160669
P46460	Nsf	Vesicle-fusing ATPase	NSF_MOUSE	7.11403	7.23653	6.67565	7.9171	10.0316	8.61298	10.5469	10.6668	Enrich	2.79531	0.00287307	0.00773086	NotSig	1.40918	0.0276411	0.0889062	Enrich	3.73995	0.000992784	0.00253633	Enrich	2.71417	0.000316474	0.0114227	0.55416	0.108955	0.17977	8.53528	1.60987	6.48184e-48	-0.038906	0.165007
P46471	Psmc2	26S proteasome regulatory subunit 7	PRS7_MOUSE	0.836092	1.30362	0.873827	0	8.26227	6.0026	7.38183	6.79337	Enrich	7.08536	0.00249604	0.00685724	NotSig	2.91256	0.0327971	0.100392	Enrich	6.05187	0.00378417	0.0081938	Enrich	inf	0.0150938	0.0488247	-0.866986	0.0150301	0.0446752	5.99138	-1.38078	2.04496e-05	-1.43575	4.33379e-20
P46638	Rab11b	Ras-related protein Rab-11B	RB11B_MOUSE	2.20508	3.47661	2.64082	4.48451	9.41883	6.93058	8.32265	7.51661	Enrich	5.90979	0.0103129	0.022616	NotSig	2.73256	0.0599338	0.145715	NotSig	4.0681	0.0328978	0.0502844	Enrich	2.73818	0.00765797	0.0339535	-1.13919	0.0197227	0.054777	6.70949	-0.468971	0.863943	-0.050104	0.25464
P46660	Ina	Alpha-internexin	AINX_MOUSE	7.53541	8.04732	6.29024	6.03371	10.8531	9.37847	8.45823	6.61237	Enrich	3.41823	0.00225116	0.00626588	NotSig	1.39431	0.0255635	0.0842612	Enrich	2.29504	0.00865553	0.0164783	NotSig	0.495221	0.181212	0.262706	-2.46951	0.0113812	0.037514	8.96404	1.2088	4.16992e-58	1.013	2.53141e-42
P46664	Adss2	Adenylosuccinate synthetase isozyme 2	PURA2_MOUSE	0	0	0	0	5.11024	3.56434	6.75291	5.86577	Enrich	inf	5.30032e-05	0.000377049	Enrich	inf	0.00230988	0.012565	Enrich	inf	7.6722e-05	0.000569659	NotSig	inf	0.0302139	0.0666392	1.69686	0.00136253	0.0101106
P46737	Brcc3	Lys-63-specific deubiquitinase BRCC36	BRCC3_MOUSE	0	0	0	0	4.1694	0.536808	3.47735	4.8813	Enrich	inf	6.11829e-06	0.000148896	NotSig	inf	0.391002	0.454376	Enrich	inf	6.01872e-05	0.000569659	NotSig	inf	0.311852	0.417834	-0.736832	0.00268815	0.0149319	5.31548	0.453441	0.326483	-0.631924	0.119533
P46935	Nedd4	E3 ubiquitin-protein ligase NEDD4	NEDD4_MOUSE	0	0	0	0.854243	5.3214	3.04428	5.55367	5.18541	Enrich	inf	2.3744e-06	0.000127864	NotSig	inf	0.0629146	0.145715	Enrich	inf	0.000121825	0.000600614	Enrich	3.88026	0.0131222	0.0457861	0.27927	0.358003	0.451914	7.80886	-0.19407	0.000116706	-0.565566	0.0156178
P46978	Stt3a	Dolichyl-diphosphooligosaccharide--protein glycosyltransferase subunit STT3A	STT3A_MOUSE	4.05678	1.89211	4.35349	7.14471	4.569	3.37146	5.64028	7.18571	NotSig	0.549513	0.0300648	0.0557882	NotSig	1.31689	0.39274	0.455798	Enrich	1.26494	0.0133893	0.0236524	NotSig	-0.0338915	0.894229	0.918741	1.12079	0.00496879	0.0220173	5.49981	-0.889591	0.553097	0.315008	0.053665
P47199	Cryz	Quinone oxidoreductase	QOR_MOUSE	1.99572	0	3.10145	1.49156	4.4473	1.31559	4.76121	4.4274	NotSig	1.4208	0.126308	0.181095	NotSig	inf	0.193534	0.291617	NotSig	1.04133	0.212348	0.249478	NotSig	2.56974	0.0416966	0.0797884	0.311179	0.268607	0.359384	2.82042	1.23324	1	-0.31002	0.391823
P47708	Rph3a	Rabphilin-3A	RP3A_MOUSE	3.04712	3.42497	2.12023	3.90404	5.66364	6.16731	9.24605	8.16867	Enrich	2.61136	0.00449978	0.0112135	Enrich	2.84057	0.000496256	0.00481766	Enrich	6.79918	0.00231109	0.00528329	NotSig	4.3697	0.0179931	0.0525766	3.65327	0.000117973	0.00310375	7.85192	1.40199	6.56812e-30	1.4121	8.4662e-32
P47738	Aldh2	Aldehyde dehydrogenase, mitochondrial	ALDH2_MOUSE	6.88651	6.9783	6.47777	9.48742	6.87897	6.81692	6.47211	9.41099	NotSig	-0.0874532	0.988037	0.990559	NotSig	-0.10726	0.73342	0.772939	NotSig	-0.0256289	0.985887	0.986919	NotSig	-0.109755	0.768908	0.813168	-0.443521	0.264002	0.355359	4.57244	-2.90359	3.19702e-11	-2.16724	8.48288e-12
P47746	Cnr1	Cannabinoid receptor 1	CNR1_MOUSE	1.95949	0.796943	1.59845	3.91906	4.8161	1.39932	5.57635	4.70476	NotSig	1.95133	0.0851958	0.1274	NotSig	2.54712	0.724431	0.765588	Enrich	3.53766	0.0215124	0.034909	NotSig	0.765352	0.0422727	0.0803982	0.775194	0.0129942	0.0407423	2.22694	-2.98334	0.0116202	-6.81466	3.08591e-112
P47753	Capza1	F-actin-capping protein subunit alpha-1	CAZA1_MOUSE	0	0	3.12081	1.77985	6.57967	5.96859	7.21644	6.6026	Enrich	inf	1.98187e-05	0.000222629	Enrich	inf	0.00017256	0.00311541	NotSig	1.93923	0.108259	0.138227	NotSig	1.48717	0.0726309	0.120097	0.679174	0.0759593	0.138779	5.06697	0.148491	0.406022	2.19035	3.84428e-14
P47754	Capza2	F-actin-capping protein subunit alpha-2	CAZA2_MOUSE	1.71543	2.61633	4.87471	4.94663	8.14052	6.92626	8.79193	7.98766	NotSig	3.30866	0.0327067	0.0599224	NotSig	2.62319	0.0654223	0.146806	NotSig	2.63488	0.0979074	0.126587	NotSig	2.67891	0.0190844	0.0538618	0.678401	0.0582379	0.115756	7.01606	-0.748031	0.491192	-1.53927	1.53547e-35
P47757-2	Capzb	Isoform 2 of F-actin-capping protein subunit beta	CAPZB_MOUSE	5.19108	4.76019	5.37131	5.62769	7.80104	6.60351	8.34694	8.21796	Enrich	2.49208	0.0068266	0.0160454	Enrich	1.85903	0.00201589	0.0113781	Enrich	2.89052	0.00171218	0.0040597	Enrich	2.52383	0.00182722	0.0163238	0.60345	0.119719	0.192055	7.83141	-0.238478	0.0336724	-0.460841	0.0489832
P47791;P47791-2	Gsr	Glutathione reductase, mitochondrial;Isoform Cytoplasmic of Glutathione reductase, mitochondrial	GSHR_MOUSE	0	1.08579	2.19187	4.47147	4.11527	5.13774	5.56322	6.01259	NotSig	inf	0.0600035	0.0966099	NotSig	3.10818	0.0252858	0.0834495	NotSig	2.2529	0.0746729	0.0999237	NotSig	1.55623	0.027321	0.0632092	0.436399	0.376729	0.468121	4.1806	-1.31515	0.0156014	-1.07375	0.000221588
P47802	Mtx1	Metaxin-1	MTX1_MOUSE	0	0	0	1.64674	4.94324	0.883631	4.45079	4.78386	Enrich	inf	8.39788e-05	0.000485946	NotSig	inf	0.391002	0.454376	Enrich	inf	0.000103741	0.000590983	NotSig	2.59627	0.0424993	0.0807745	-0.5156	0.0776387	0.140079	4.76569	-0.535857	0.751499	-1.12422	0.00123566
P47809	Map2k4	Dual specificity mitogen-activated protein kinase kinase 4	MP2K4_MOUSE	0	0	0	0	5.95633	4.98921	7.07247	6.44671	Enrich	inf	5.65403e-06	0.000146663	Enrich	inf	0.00026603	0.0035206	Enrich	inf	5.94545e-05	0.000569659	NotSig	inf	0.0189515	0.053793	1.16454	0.00872213	0.0315918	7.83432	2.2209	4.51381e-47	1.82885	3.31392e-47
P47856;P47856-2	Gfpt1	Glutamine--fructose-6-phosphate aminotransferase [isomerizing] 1;Isoform 2 of Glutamine--fructose-6-phosphate aminotransferase [isomerizing] 1	GFPT1_MOUSE	0.729211	0	0	0	5.35043	2.38501	0.266401	0	Enrich	4.61915	0.00697312	0.0163062	NotSig	inf	0.0610777	0.145715	NotSig	inf	0.391002	0.422677					-7.20272	4.1312e-05	0.00241353	6.25222	0.680067	6.71104e-06	1.14568	8.48557e-09
P47857	Pfkm	ATP-dependent 6-phosphofructokinase, muscle type	PFKAM_MOUSE	5.31635	5.40055	3.62621	5.62482	8.28946	6.66565	7.85336	8.45799	Enrich	2.91223	0.0014271	0.00427509	NotSig	1.33368	0.0333489	0.101059	NotSig	3.40818	0.0400473	0.0591752	Enrich	2.8366	0.00318787	0.0210354	-0.404589	0.141063	0.219556	7.29872	-0.095466	7.23777e-08	0.14969	0.00440539
P47911	Rpl6	60S ribosomal protein L6	RL6_MOUSE	9.14655	9.44987	8.72423	8.68376	9.29837	9.39832	7.85876	8.24631	NotSig	-0.040754	0.762976	0.799004	NotSig	0.00716156	0.925223	0.943309	NotSig	-0.827957	0.0875114	0.114745	NotSig	-0.525567	0.276241	0.376765	-1.3411	0.0168572	0.0489805	6.22611	-1.32686	5.66721e-06	0.624692	0.000407344
P47915	Rpl29	60S ribosomal protein L29	RL29_MOUSE	6.76006	7.0491	6.44122	6.1046	6.7238	7.49115	6.13253	6.32705	NotSig	-0.208845	0.944372	0.956546	NotSig	0.495048	0.373502	0.454376	NotSig	-0.352196	0.415458	0.44726	NotSig	0.134803	0.58014	0.654141	-0.587551	0.0576976	0.115077	5.35089	-1.85395	1.87073e-07	-0.630273	0.0883078
P47941	Crkl	Crk-like protein	CRKL_MOUSE	0.850219	0.981743	0.686781	4.08431	6.33281	5.77616	7.99444	6.88319	Enrich	5.07581	0.00680107	0.0160128	NotSig	3.97751	0.0137788	0.0514046	Enrich	7.52015	0.000879328	0.00228514	Enrich	2.80686	0.00159256	0.0155731	1.7014	0.00146425	0.0104419	2.86213	-1.05361	0.717687	1.80143	0.00872288
P47962	Rpl5	60S ribosomal protein L5	RL5_MOUSE	1.46917	0	0	1.16509	6.4453	1.21137	5.13457	0	NotSig	2.63964	0.0410608	0.0731803	NotSig	inf	0.391002	0.454376	Enrich	inf	1.91677e-05	0.000569659	NotSig	#NAME?	0.391002	0.49801	-1.38728	0.00649367	0.0256886	4.11108	-0.808168	0.7661	-0.477723	0.339229
P47963	Rpl13	60S ribosomal protein L13	RL13_MOUSE	8.13088	8.29383	7.55667	7.29322	8.05273	8.38061	6.86356	7.28781	NotSig	-0.205629	0.857972	0.883382	NotSig	0.0916321	0.868336	0.894222	NotSig	-0.700037	0.10701	0.136815	NotSig	-0.0797928	0.986901	0.990071	-1.14747	0.00978047	0.0342257	7.08484	-2.18669	4.15386e-22	-0.516444	0.354173
P47964	Rpl36	60S ribosomal protein L36	RL36_MOUSE	6.76174	7.43638	7.73094	6.58078	6.7434	8.58323	7.74851	6.90023	NotSig	-0.0577581	0.976904	0.982631	NotSig	1.05429	0.0756742	0.160166	NotSig	-0.0648482	0.965201	0.9679	NotSig	0.185676	0.48556	0.580066	0.87829	0.0767698	0.139293	4.54299	-2.37438	5.26865e-12	-0.498736	0.32572
P47968	Rpia	Ribose-5-phosphate isomerase	RPIA_MOUSE	0.525206	0	1.31935	0	0.57075	1.78779	0.652327	0	NotSig	0.233286	0.955096	0.96439	NotSig	inf	0.188157	0.288766	NotSig	-3.66056	0.656192	0.683096					-0.37201	0.910093	0.926745	4.29356	0.025152	0.833443	0.661616	0.000444463
P48036	Anxa5	Annexin A5	ANXA5_MOUSE	2.41729	5.82551	2.74716	4.53406	7.17911	7.1478	8.54948	7.93296	NotSig	3.2001	0.0439856	0.0777381	NotSig	1.16772	0.0584342	0.145715	NotSig	4.07382	0.034528	0.0521647	Enrich	3.23492	0.00387121	0.0233019	1.39499	0.00256499	0.0144699	5.52639	-2.39373	4.96079e-08	-1.14217	0.0975474
P48320	Gad2	Glutamate decarboxylase 2	DCE2_MOUSE	4.47941	3.18066	2.8035	4.95328	5.85857	5.13968	5.36788	5.86438	Enrich	1.29705	0.0259698	0.0492871	NotSig	1.5086	0.197125	0.293788	NotSig	2.10651	0.0719164	0.0968223	NotSig	0.885561	0.0250837	0.0604557	-0.493981	0.0336898	0.0781862	5.46116	-2.2338	2.45555e-13	-4.2077	2.11018e-209
P48453;P48453-2	Ppp3cb	Serine/threonine-protein phosphatase 2B catalytic subunit beta isoform;Isoform 1 of Serine/threonine-protein phosphatase 2B catalytic subunit beta isoform	PP2BB_MOUSE	0	1.86787	0.925914	4.16459	5.98162	5.08009	6.79238	6.8242	Enrich	inf	7.0442e-05	0.00043434	NotSig	2.52982	0.0531346	0.145715	Enrich	5.25303	0.00576059	0.0116717	Enrich	2.65953	0.00098213	0.0137352	0.84699	0.0479333	0.101403	7.58475	0.90727	9.46063e-23	-0.986916	1.56513e-20
P48542;P48542-2	Kcnj6	G protein-activated inward rectifier potassium channel 2;Isoform GIRK2-1 of G protein-activated inward rectifier potassium channel 2	KCNJ6_MOUSE	0	0	0	0	5.53383	2.59821	4.68738	4.38515	Enrich	inf	9.0171e-05	0.000513396	NotSig	inf	0.0799892	0.166132	Enrich	inf	8.9159e-05	0.000584012	NotSig	inf	0.0314558	0.0684382	-0.886148	0.0153495	0.0452818	5.69034	6.15963	3.80948e-16	8.70747	1.47535e-31
P48722	Hspa4l	Heat shock 70 kDa protein 4L	HS74L_MOUSE	4.64176	4.34089	4.16677	4.70134	7.63809	6.2595	8.26023	8.27294	Enrich	2.99088	0.000362732	0.00139708	Enrich	1.97092	0.0103192	0.0403678	Enrich	4.15926	2.67246e-05	0.000569659	Enrich	3.57232	0.000734705	0.0131974	0.661588	0.0731111	0.135025	7.5599	1.46371	3.54132e-24	0.895117	1.01999e-16
P48758	Cbr1	Carbonyl reductase [NADPH] 1	CBR1_MOUSE	4.33117	4.59441	4.69711	4.95594	6.32928	5.72804	6.96643	6.82578	Enrich	2.00841	0.00138725	0.00418764	NotSig	1.10984	0.0233494	0.078421	Enrich	2.05753	0.0224086	0.0360776	Enrich	1.82805	0.00868675	0.0363911	0.66481	0.0355423	0.0810895	5.44643	-0.170135	0.732658	-1.58264	1.05684e-19
P48771	Cox7a2	Cytochrome c oxidase subunit 7A2, mitochondrial	CX7A2_MOUSE	1.24511	2.6149	1.2938	4.88125	4.66676	3.72183	5.8036	5.79352	NotSig	1.8898	0.0646376	0.100767	NotSig	0.454123	0.597485	0.64685	Enrich	3.18209	0.0311063	0.0479034	NotSig	0.951824	0.314553	0.420651	1.49299	0.211885	0.299321	7.08232	-1.68919	8.18563e-16	-2.28496	1.76967e-85
P48774	Gstm5	Glutathione S-transferase Mu 5	GSTM5_MOUSE	4.0921	4.44946	3.7451	5.51774	6.44952	5.71049	6.72402	6.77095	Enrich	2.36833	0.000972963	0.00314043	Enrich	1.33179	0.00393794	0.018942	Enrich	2.8148	0.0100547	0.018611	Enrich	1.19721	0.0149931	0.0487495	0.273679	0.288748	0.3807	5.48643	-3.20018	3.83792e-28	-3.03244	5.05166e-34
P48962	Slc25a4	ADP/ATP translocase 1	ADT1_MOUSE	9.43205	9.79525	8.74931	10.8382	10.051	10.3074	10.9176	11.5193	NotSig	-0.0171932	0.480586	0.535098	NotSig	0.410354	0.373723	0.454376	Enrich	2.26402	0.026296	0.0412484	NotSig	0.720773	0.365418	0.47843	1.21027	0.205803	0.293107	10.111	-0.146375	0.0394278	-0.860486	1.72906e-49
P49025;P49025-3;P49025-4;P49025-5	Cit	Citron Rho-interacting kinase;Isoform 3 of Citron Rho-interacting kinase;Isoform 4 of Citron Rho-interacting kinase;Isoform 5 of Citron Rho-interacting kinase	CTRO_MOUSE	0.672752	0	0	2.19523	7.47574	5.16977	5.85039	5.56029	Enrich	7.04242	0.00146574	0.00436705	Enrich	inf	0.0025502	0.0134862	Enrich	inf	0.00017218	0.000686091	NotSig	1.43024	0.0986624	0.154249	-1.59635	0.0027349	0.0151046	8.26329	1.18663	6.34815e-32	1.39785	4.78129e-41
P49135	Ercc3	General transcription and DNA repair factor IIH helicase subunit XPB	ERCC3_MOUSE	0	0	0	0	3.86323	2.05464	4.53194	4.45634	Enrich	inf	1.05754e-05	0.000177332	NotSig	inf	0.18189	0.288495	Enrich	inf	8.79478e-05	0.000580051	NotSig	inf	0.0247316	0.0601301	0.727441	0.0162354	0.0474598	4.61327	0.781227	0.0295946	0.672593	0.01468
P49312	Hnrnpa1	Heterogeneous nuclear ribonucleoprotein A1	ROA1_MOUSE	3.21204	6.24631	6.01982	3.61415	7.99327	5.8078	5.06875	7.02052	NotSig	3.54358	0.0376858	0.0679135	NotSig	-0.359189	0.465174	0.522534	NotSig	-1.58541	0.535071	0.563346	NotSig	0.989112	0.208687	0.295973	-2.5543	0.0207577	0.0566192	3.16195	-2.71956	0.406022	1.2466	0.292314
P49442	Inpp1	Inositol polyphosphate 1-phosphatase	INPP_MOUSE	0	0	0.623074	0	4.33247	2.16081	5.75547	5.97685	Enrich	inf	0.000195405	0.000844911	NotSig	inf	0.182648	0.288495	Enrich	5.54768	0.00254627	0.00576125	NotSig	inf	0.0347177	0.0716243	1.46018	0.00149808	0.0104579	6.05286	0.053051	0.0103118	0.45263	4.34398e-06
P49443	Ppm1a	Protein phosphatase 1A	PPM1A_MOUSE	0	0	1.10956	0	6.2835	4.76587	6.43989	5.91585	Enrich	inf	3.34704e-05	0.000296915	Enrich	inf	0.000956901	0.00687934	Enrich	4.11972	0.014455	0.0252412	NotSig	inf	0.0262419	0.0619352	0.199719	0.636568	0.700201	6.22981	0.314111	0.0200045	0.12529	0.433587
P49446;P49446-2;P49446-3	Ptpre	Receptor-type tyrosine-protein phosphatase epsilon;Isoform 2 of Receptor-type tyrosine-protein phosphatase epsilon;Isoform 3 of Receptor-type tyrosine-protein phosphatase epsilon	PTPRE_MOUSE	0	0	0	0	5.37719	1.10577	2.87171	1.75274	Enrich	inf	0.000105413	0.000554276	NotSig	inf	0.391002	0.454376	NotSig	inf	0.0584924	0.0819407	NotSig	inf	0.5	0.580066	-2.05535	0.0776299	0.140079	7.32681	0.874313	1.6815e-13	1.2375	7.84581e-17
P49615	Cdk5	Cyclin-dependent-like kinase 5	CDK5_MOUSE	2.82934	1.72019	0.739994	3.46116	6.54236	5.47424	7.56896	7.06522	NotSig	3.17172	0.0322512	0.0593646	NotSig	3.16345	0.0295792	0.0928022	Enrich	6.82992	0.00188942	0.0044287	Enrich	3.68679	0.000338458	0.0114227	1.06144	0.00694973	0.0268525	6.74377	-0.568023	0.248057	0.397137	0.00209423
P49722	Psma2	Proteasome subunit alpha type-2	PSA2_MOUSE	5.55941	3.59115	6.1543	6.33819	7.63804	7.22406	6.52061	7.00924	Enrich	1.8715	0.0175386	0.0354901	NotSig	2.72434	0.0629292	0.145715	NotSig	0.243502	0.514728	0.543924	NotSig	0.632111	0.0534681	0.0937025	-1.06115	0.0229484	0.0599151	5.96879	-1.59147	2.40036e-07	-2.37304	1.59307e-46
P49769;Q61144;Q61144-2	Psen1;Psen2;Psen2	Presenilin-1;Presenilin-2;Isoform 2 of Presenilin-2	PSN1_MOUSE;PSN2_MOUSE;PSN2_MOUSE	0	0	0	0.801184	0	0	4.46988	4.1581	NotSig				NotSig				Enrich	inf	0.010765	0.0196468	NotSig	3.16151	0.0306966	0.0673075	inf	0.010765	0.0362676
P50114	S100b	Protein S100-B	S100B_MOUSE	2.00121	2.00575	0.693642	1.07992	4.38724	4.21653	4.28138	3.34938	NotSig	1.39125	0.137068	0.193998	NotSig	1.11693	0.159466	0.280599	Enrich	3.74532	0.00905862	0.0171433	NotSig	2.39456	0.0355768	0.0725735	-0.191967	0.835405	0.867479	5.71615	-3.88448	1.58967e-50	-1.18819	0.710302
P50153	Gng4	Guanine nucleotide-binding protein G(I)/G(S)/G(O) subunit gamma-4	GBG4_MOUSE	0.766975	0	0	2.25503	5.85847	3.76212	6.25544	6.76534	Enrich	5.10943	0.00300202	0.00802289	NotSig	inf	0.0667399	0.147698	Enrich	inf	1.01723e-05	0.000569659	NotSig	3.30943	0.0401714	0.0779105	0.253565	0.37499	0.466258	6.17891	2.44488	3.78015e-14	3.21016	3.27427e-35
P50247	Ahcy	Adenosylhomocysteinase	SAHH_MOUSE	5.75716	5.57411	5.81837	5.1449	6.27488	5.93016	7.03436	6.53494	NotSig	0.475917	0.181892	0.245991	NotSig	0.431092	0.34866	0.454376	Enrich	1.17915	0.00977663	0.0182374	NotSig	1.38147	0.0242341	0.0593915	0.745666	0.0129176	0.0406843	2.63786	1.21149	0.726995	-0.005218	0.803412
P50396	Gdi1	Rab GDP dissociation inhibitor alpha	GDIA_MOUSE	5.349	5.89748	5.29531	6.12585	8.89492	7.84037	9.60706	9.03461	Enrich	3.46458	0.00139531	0.00420736	Enrich	1.92113	0.0104155	0.0406833	Enrich	4.2137	0.000370227	0.00113532	NotSig	2.91838	0.0162412	0.0503655	0.756434	0.0446365	0.0960432	8.29045	0.735776	5.59941e-19	0.473563	1.84794e-08
P50405	Sftpb	Pulmonary surfactant-associated protein B	PSPB_MOUSE	0	1.7625	3.50867	0	2.91747	6.62841	3.68831	7.3192	NotSig	inf	0.181967	0.245991	NotSig	1.79063	0.0655785	0.146958	NotSig	-1.40312	0.943011	0.947636	NotSig	inf	0.0258083	0.0613248	-0.212965	0.728433	0.779906	0
P50427	Sts	Steryl-sulfatase	STS_MOUSE	4.55709	1.2306	2.14815	7.28576	3.09023	3.5123	3.48055	7.13121	NotSig	-1.02091	0.255966	0.325281	NotSig	1.3381	0.227928	0.328372	NotSig	0.218994	0.366091	0.411727	NotSig	-0.226662	0.596917	0.670102	-0.179806	0.737208	0.787843
P50429	Arsb	Arylsulfatase B	ARSB_MOUSE	0.853149	0.750685	0	4.76452	1.46616	1.7137	3.56931	4.7902	NotSig	0.469752	0.628724	0.676974	NotSig	1.50061	0.471139	0.527686	Enrich	inf	7.79731e-05	0.000569659	NotSig	-0.103175	0.965423	0.973146	1.71709	0.0882398	0.153845	4.86809	-1.1719	0.646102	-0.790032	0.200074
P50516	Atp6v1a	V-type proton ATPase catalytic subunit A	VATA_MOUSE	5.50656	5.86596	5.65865	6.73148	8.9323	7.94802	11.029	11.2976	Enrich	3.35405	0.00141257	0.00424081	Enrich	2.14606	0.00432052	0.0204495	Enrich	5.27376	0.000177619	0.000697184	Enrich	4.54192	0.000818803	0.0133755	2.13052	0.0007545	0.0074523	9.20384	0.818443	1.11805e-30	0.422125	2.50813e-13
P50518	Atp6v1e1	V-type proton ATPase subunit E 1	VATE1_MOUSE	1.75649	0.919753	2.1925	3.97622	7.05081	6.3559	9.63686	8.86382	Enrich	4.69406	0.0112072	0.0242486	Enrich	4.81301	0.0082076	0.033588	Enrich	6.10447	0.00914018	0.0172634	Enrich	4.91971	8.33766e-05	0.0113696	2.60498	0.000730502	0.00741626	8.46643	0.403943	5.96464e-14	-0.718074	1.4079e-11
P50543	S100a11	Protein S100-A11	S10AB_MOUSE	4.95685	5.10959	7.07429	5.74266	6.82288	7.37942	5.37432	5.46846	NotSig	0.0957895	0.369748	0.443422	NotSig	0.63508	0.299993	0.415274	Deplete	-1.81188	0.0261772	0.0411069	NotSig	-0.749105	0.755293	0.801786	-1.38144	0.0216784	0.058144	1.07892	-7.86668	3.49304e-13	-5.41055	1.32477e-05
P50571	Gabrb1	Gamma-aminobutyric acid receptor subunit beta-1	GBRB1_MOUSE	0	0	0	0.738008	7.01148	3.10403	2.19716	4.07022	Enrich	inf	0.000276899	0.00112644	NotSig	inf	0.0608852	0.145715	NotSig	inf	0.0743529	0.099635	NotSig	3.28399	0.0163648	0.0504925	-4.65018	0.00533104	0.0228902	8.33843	-0.25671	3.28106e-12	0.822299	1.46192e-22
P50586	Tub	Tubby protein	TUB_MOUSE	0	1.00112	0	2.03846	6.79513	5.41125	5.00658	6.70674	Enrich	inf	2.49144e-05	0.000253758	NotSig	3.51793	0.0190295	0.0666912	Enrich	inf	0.000542721	0.00152803	NotSig	0.646339	0.103483	0.160712	-1.74083	0.0055957	0.0235377	7.29289	2.85777	1.56194e-32	4.05554	2.52897e-74
P51125;P51125-2;P51125-3;P51125-6	Cast	Calpastatin;Isoform 2 of Calpastatin;Isoform 3 of Calpastatin;Isoform 6 of Calpastatin	ICAL_MOUSE	0	1.30133	1.14276	0.755287	5.53537	5.88568	8.18662	7.36218	Enrich	inf	2.372e-05	0.000245225	NotSig	2.74799	0.0368928	0.109893	Enrich	5.76787	0.00622416	0.012418	Enrich	6.52829	0.002604	0.0195868	2.75698	0.00185406	0.0117331	5.89523	0.738281	1.43671e-09	2.91548	1.23552e-29
P51141	Dvl1	Segment polarity protein dishevelled homolog DVL-1	DVL1_MOUSE	0.629695	0	0.815346	0.408168	4.96907	3.99293	5.24487	4.34965	Enrich	4.68982	0.0056005	0.0136055	Enrich	inf	0.000576192	0.00509193	Enrich	4.13674	0.010267	0.0189063	Enrich	5.21892	0.00106452	0.014224	0.307282	0.241517	0.330317	6.29805	0.835149	1.83574e-08	1.90505	3.64894e-18
P51150	Rab7a	Ras-related protein Rab-7a	RAB7A_MOUSE	2.6617	3.40939	4.29596	5.95147	10.6249	8.57895	9.63083	8.59593	Enrich	6.07396	0.0145308	0.0300675	NotSig	4.15633	0.0221369	0.0754924	NotSig	4.15197	0.0362141	0.054454	Enrich	2.64256	0.000712512	0.0131974	-1.01286	0.00546685	0.0231959
P51410	Rpl9	60S ribosomal protein L9	RL9_MOUSE	2.44275	3.00402	1.99298	1.25913	5.39951	4.71802	4.3933	0	NotSig	1.32707	0.135203	0.191654	NotSig	0.765529	0.236439	0.339027	NotSig	1.45675	0.127477	0.159778	NotSig	#NAME?	0.391002	0.49801	-1.12253	0.0411873	0.0905056	2.52926	-1.81147	0.0117592	-0.31832	1
P51569	Gla	Alpha-galactosidase A	AGAL_MOUSE	0	0	1.7269	0	0	1.02841	0	0	NotSig				NotSig	inf	0.391002	0.454376	NotSig	#NAME?	0.391002	0.422677								3.08566	-1.81078	0.323301	0.154259	0.329149
P51660	Hsd17b4	Peroxisomal multifunctional enzyme type 2	DHB4_MOUSE	0.995134	1.95997	1.50055	4.87307	3.16961	2.26125	4.78714	5.16655	NotSig	1.85999	0.185789	0.246701	NotSig	0.650715	0.868305	0.894222	NotSig	0.799309	0.115261	0.146255	NotSig	0.165827	0.642893	0.708973	1.03271	0.225163	0.313129	4.77062	-2.25741	2.71365e-09	-1.3286	0.0091619
P51667	Myl2	Myosin regulatory light chain 2, ventricular/cardiac muscle isoform	MLRV_MOUSE	1.60489	3.94779	7.3905	5.16766	3.16583	9.24382	5.97408	4.92111	NotSig	1.01907	0.546917	0.598496	NotSig	1.68963	0.111813	0.213205	NotSig	-1.54641	0.107328	0.13716	NotSig	-0.343102	0.47004	0.579764	0.709694	0.225859	0.313946	0			#NAME?	0.390612
P51830	Adcy9	Adenylate cyclase type 9	ADCY9_MOUSE	0	0.793494	0	3.90346	2.58905	2.92836	5.34877	5.16283	NotSig	inf	0.0577998	0.0966099	NotSig	2.39346	0.143293	0.258589	Enrich	inf	0.000117454	0.000599543	Enrich	1.2727	0.00859583	0.0362856	2.45585	0.0459971	0.0983856	4.52493	1.37261	0.000673875	0.115008	0.536974
P51855	Gss	Glutathione synthetase	GSHB_MOUSE	4.66133	3.21574	5.29759	4.38993	6.5049	4.83686	4.91024	4.9221	Enrich	1.85347	0.000993393	0.00318767	NotSig	1.21165	0.251887	0.356773	NotSig	-1.12963	0.657894	0.68462	NotSig	0.208722	0.437333	0.546617	-1.63557	0.000230052	0.00438591	3.71298	-2.01634	2.15073e-07	0.526731	0.0967421
P51859	Hdgf	Hepatoma-derived growth factor	HDGF_MOUSE	0	1.51379	1.30389	0	4.1163	5.60592	1.64729	0	NotSig	inf	0.0669337	0.103235	NotSig	1.71978	0.069277	0.151668	NotSig	-1.03137	0.839248	0.853831					-3.27235	0.214387	0.301916	8.14453	-0.101594	0.0192042	0.378209	1.58503e-08
P51863	Atp6v0d1	V-type proton ATPase subunit d 1	VA0D1_MOUSE	4.85494	5.07705	4.77948	5.85148	6.55916	6.25917	9.26221	8.75564	Enrich	1.72021	0.000516414	0.00185155	Enrich	1.23396	0.00581537	0.0258677	Enrich	4.43584	0.000199231	0.000739226	Enrich	2.91371	0.00173804	0.0159661	2.7158	7.18032e-06	0.00192648	8.18302	0.805099	1.86077e-19	0.562561	4.13161e-15
P51880	Fabp7	Fatty acid-binding protein, brain	FABP7_MOUSE	0	0	0	0	0	0	0.622954	0	NotSig				NotSig				NotSig	inf	0.382062	0.422677					inf	0.382062	0.469332	2.67219	-5.20087	6.09083e-11	-4.55646	2.762e-12
P51881	Slc25a5	ADP/ATP translocase 2	ADT2_MOUSE	9.03629	9.19953	8.41064	10.4592	9.50002	9.76668	10.8751	11.2008	NotSig	-0.211586	0.600712	0.650205	NotSig	0.4612	0.448619	0.507583	NotSig	2.8518	0.0336386	0.0510901	NotSig	0.785488	0.372665	0.485378	1.9945	0.149864	0.230328	6.22282	-2.37269	4.74312e-19	-3.09935	6.91926e-130
P51906	Slc1a1	Excitatory amino acid transporter 3	EAA3_MOUSE	0	0	0	0	4.29535	1.24586	4.5231	4.1848	Enrich	inf	0.000429727	0.00160129	NotSig	inf	0.391002	0.454376	Enrich	inf	0.000219817	0.000785374	NotSig	inf	0.062242	0.106102	0.22773	0.512546	0.583979	4.6343	-1.91911	0.00193744	-1.43957	3.85656e-11
P52196	Tst	Thiosulfate sulfurtransferase	THTR_MOUSE	0	0	1.60464	2.53115	0	1.16252	2.07704	4.37512	NotSig				NotSig	inf	0.391002	0.454376	NotSig	-1.30314	0.822283	0.837759	NotSig	0.302996	0.297288	0.400996	inf	0.183092	0.269515	1.28734	-4.88787	1.03034e-06	-4.00657	0.00103942
P52479;P52479-2	Usp10	Ubiquitin carboxyl-terminal hydrolase 10;Isoform 2 of Ubiquitin carboxyl-terminal hydrolase 10	UBP10_MOUSE	0	0	0	0	5.38113	2.62937	4.06142	3.05992	Enrich	inf	4.46656e-05	0.000346359	NotSig	inf	0.061196	0.145715	Enrich	inf	0.000169934	0.000679975	NotSig	inf	0.0489895	0.0886161	-1.36353	0.00124957	0.00964331	6.39297	1.1979	4.27154e-09	0.910876	3.11093e-08
P52480	Pkm	Pyruvate kinase PKM	KPYM_MOUSE	8.95399	8.77281	9.06574	8.71307	10.7724	9.96633	11.5932	11.3779	Enrich	1.76546	0.0033408	0.00876641	Enrich	1.22621	0.00492452	0.0228209	Enrich	2.46937	0.000811738	0.00212683	Enrich	2.62857	0.0003272	0.0114227	0.823248	0.00797824	0.0296774	9.23973	0.828644	2.48191e-42	0.3255	4.50833e-10
P52480-2	Pkm	Isoform M1 of Pyruvate kinase PKM	KPYM_MOUSE	7.78519	7.8227	6.90123	7.86045	9.61338	8.90827	10.6326	10.8257	Enrich	1.72222	0.0116007	0.0249428	NotSig	1.05844	0.0216061	0.0741577	Enrich	3.57606	0.00212736	0.00492209	Enrich	2.92099	0.000354387	0.0114472	1.03566	0.0022022	0.0130598	9.23973	0.828644	2.48191e-42	0.3255	4.50833e-10
P52503	Ndufs6	NADH dehydrogenase [ubiquinone] iron-sulfur protein 6, mitochondrial	NDUS6_MOUSE	0.696578	1.68562	2.65215	3.45839	2.84411	4.4548	4.04739	4.58909	NotSig	3.04635	0.153012	0.213921	NotSig	2.24576	0.0615575	0.145715	NotSig	0.962876	0.21535	0.252695	Enrich	1.17672	0.00601778	0.0296252	0.365792	0.345514	0.437027	6.82971	-1.36023	4.34711e-07	-1.64904	6.48429e-34
P52760	Rida	2-iminobutanoate/2-iminopropanoate deaminase	RIDA_MOUSE	1.10215	1.09204	1.01221	1.97716	4.71907	4.06027	4.85943	5.33952	NotSig	2.3382	0.0455914	0.0802666	NotSig	2.07943	0.0713052	0.15374	Enrich	2.87855	0.030332	0.0468871	NotSig	2.44005	0.0582462	0.10051	0.160221	0.505213	0.576988
P53026	Rpl10a	60S ribosomal protein L10a	RL10A_MOUSE	2.22531	2.12711	1.52879	0.982186	7.35094	4.83318	4.36953	2.92646	NotSig	2.85891	0.0423497	0.0751365	NotSig	1.89912	0.115619	0.218895	NotSig	2.97224	0.0454639	0.0660435	NotSig	0.961202	0.146279	0.218138	-2.6284	0.012686	0.0402119	1.61632	0.369577	0.621871	-0.939287	0.841835
P53395	Dbt	Lipoamide acyltransferase component of branched-chain alpha-keto acid dehydrogenase complex, mitochondrial	ODB2_MOUSE	0	0	0	2.67518	1.29811	1.81651	3.1712	4.27304	NotSig	inf	0.181827	0.245991	NotSig	inf	0.181704	0.288495	Enrich	inf	0.00114391	0.00286376	NotSig	1.09711	0.179995	0.261347	1.73511	0.0827585	0.146396	5.53714	-0.586502	0.406022	0.410613	9.40813e-05
P53612	Rabggtb	Geranylgeranyl transferase type-2 subunit beta	PGTB2_MOUSE	0.858799	0	0.737338	1.33008	5.75481	4.79379	6.69138	6.3456	Enrich	4.43367	0.0106433	0.0232849	Enrich	inf	4.83559e-05	0.00270019	Enrich	5.95425	0.00302745	0.00673836	Enrich	4.85083	0.00625694	0.0303246	0.974651	0.00888542	0.0319037	4.93013	-0.000108	0.0904885	-0.904249	0.00620006
P53776	Lhx4	LIM/homeobox protein Lhx4	LHX4_MOUSE	8.95991	9.19042	9.82571	11.887	12.6555	9.52249	11.0363	11.4103	NotSig	1.26339	0.305365	0.382227	NotSig	0.423913	0.942466	0.956165	NotSig	-1.6403	0.73866	0.760666	NotSig	-0.55195	0.308698	0.4142	-1.64983	0.0272799	0.0679416	0.120457			10.8847	0.390612
P53810	Pitpna	Phosphatidylinositol transfer protein alpha isoform	PIPNA_MOUSE	0	0.933474	0.942633	3.65569	5.60525	4.91136	7.40875	7.04529	Enrich	inf	1.22529e-05	0.000186283	NotSig	3.30653	0.0199191	0.0692611	Enrich	5.77297	0.00526208	0.0107989	Enrich	3.47148	0.00352902	0.0222468	1.84772	0.000557834	0.00648563	8.25591	0.98977	5.29647e-20	1.53316	1.29341e-52
P53986	Slc16a1	Monocarboxylate transporter 1	MOT1_MOUSE	3.77161	4.6767	2.49654	3.87819	5.1794	4.83925	5.50418	5.11483	NotSig	0.826919	0.362143	0.443013	NotSig	0.165872	0.754307	0.792127	NotSig	2.72776	0.0333764	0.0507725	Enrich	1.24666	0.0077464	0.0340433	0.147649	0.625557	0.691194	4.94262	-2.24557	1.74498e-11	-0.208828	0.112902
P53994	Rab2a	Ras-related protein Rab-2A	RAB2A_MOUSE	3.68405	4.29219	3.65679	4.78479	7.80538	5.98777	7.33361	6.98355	Enrich	4.13486	0.000258859	0.00107047	NotSig	1.65619	0.0156915	0.0571773	Enrich	3.79486	3.43159e-06	0.000428053	Enrich	2.20034	0.000692812	0.0131974	-0.49356	0.11946	0.191745	8.06948	-0.347281	0.231945	-0.965249	1.43995e-16
P53996;P53996-2;P53996-3	Cnbp	Cellular nucleic acid-binding protein;Isoform 2 of Cellular nucleic acid-binding protein;Isoform 3 of Cellular nucleic acid-binding protein	CNBP_MOUSE	0	0	0	0	5.62725	4.39678	3.45164	2.4324	Enrich	inf	9.89343e-05	0.000543053	Enrich	inf	9.8245e-05	0.00287315	Enrich	inf	0.00210101	0.00486899	NotSig	inf	0.109863	0.169127	-2.20661	0.00310064	0.016315	7.01042	-1.51601	4.79401e-08	-1.7518	4.69558e-45
P54071	Idh2	Isocitrate dehydrogenase [NADP], mitochondrial	IDHP_MOUSE	4.89733	5.15202	5.38641	5.59882	5.75725	5.81157	6.42873	6.96895	Enrich	0.871196	0.00407737	0.0103439	NotSig	0.652505	0.1127	0.214284	Enrich	1.00422	0.0244387	0.0387663	NotSig	1.19822	0.046389	0.085564	0.700874	0.0241877	0.0621111	4.39542	-0.70843	0.0658402	-1.50779	0.180757
P54227	Stmn1	Stathmin	STMN1_MOUSE	5.61146	3.11051	8.34535	6.24501	9.43968	8.56291	8.41589	9.09036	NotSig	-0.701386	0.333512	0.411651	NotSig	1.85107	0.0769156	0.161912	NotSig	0.129496	0.903777	0.912363	NotSig	0.935094	0.240329	0.334438	-1.50419	0.360872	0.453874	5.92267	-2.18817	1.12577e-18	0.238115	1.67877e-13
P54285	Cacnb3	Voltage-dependent L-type calcium channel subunit beta-3	CACB3_MOUSE	0	0	0	0	4.63938	3.99133	6.95127	5.53577	Enrich	inf	0.000147615	0.000703539	Enrich	inf	0.000100255	0.00287315	Enrich	inf	0.000103269	0.000590983	NotSig	inf	0.0415732	0.0797178	2.38087	0.000450973	0.00585254	5.69647	1.99001	3.27819e-13	1.08986	2.20544e-06
P54728	Rad23b	UV excision repair protein RAD23 homolog B	RD23B_MOUSE	6.57728	2.22674	2.36307	2.5294	7.45616	6.24217	7.16327	6.74138	NotSig	-0.936768	0.717776	0.758895	NotSig	2.29713	0.062563	0.145715	NotSig	3.49567	0.0374767	0.0560667	NotSig	3.72781	0.0173395	0.0519078	-0.288079	0.383567	0.469332	6.57646	0.76738	1.20693e-05	0.057905	0.691363
P54775	Psmc4	26S proteasome regulatory subunit 6B	PRS6B_MOUSE	1.11583	0	1.10449	0	7.41485	4.92479	5.23263	5.42729	Enrich	5.05466	0.0097356	0.0216415	Enrich	inf	0.000402863	0.00442816	Enrich	2.89649	0.030662	0.0473717	NotSig	inf	0.0160483	0.0501607	-2.20573	0.000413552	0.00572641	5.89466	-0.44646	0.237175	-0.85066	2.50161e-05
P54822	Adsl	Adenylosuccinate lyase	PUR8_MOUSE	0	0	0	0	3.41266	2.95929	5.63521	5.61405	NotSig	inf	0.0578887	0.0966099	NotSig	inf	0.0595443	0.145715	Enrich	inf	7.69376e-05	0.000569659	NotSig	inf	0.0160778	0.0501607	1.56156	0.145219	0.22498	4.23178	-1.01049	0.532351	-0.510975	0.449004
P54823	Ddx6	Probable ATP-dependent RNA helicase DDX6	DDX6_MOUSE	0.943301	0	0.754457	0.765707	6.34575	3.2747	3.56036	1.43981	Enrich	4.67607	0.0100579	0.0221985	NotSig	inf	0.0577895	0.145715	Enrich	2.67346	0.0282421	0.0439884	NotSig	0.789991	0.727926	0.777924	-2.83853	0.000455069	0.00587932	8.47621	0.197983	2.21302e-10	0.253806	1.08341e-07
P54830;P54830-2	Ptpn5	Tyrosine-protein phosphatase non-receptor type 5;Isoform STEP46 of Tyrosine-protein phosphatase non-receptor type 5	PTN5_MOUSE	0	0	1.95268	0	5.4253	4.30638	5.60306	4.69203	Enrich	inf	5.45451e-05	0.000381588	Enrich	inf	0.00170154	0.0100804	NotSig	2.79845	0.0459932	0.0665764	NotSig	inf	0.0283878	0.0645615	0.189848	0.502716	0.57459	8.9574	3.44312	1.85083e-96	0.321471	0.000113584
P54923	Adprh	[Protein ADP-ribosylarginine] hydrolase	ADPRH_MOUSE	0	0	0	3.22739	5.45638	4.58373	6.16985	5.62005	Enrich	inf	5.94441e-07	9.5355e-05	Enrich	inf	0.00105885	0.0074709	Enrich	inf	0.000193101	0.000729795	Enrich	2.47213	0.00465646	0.0261137	0.795668	0.07937	0.142051	5.94854	-0.44227	0.758874	-1.09592	2.85479e-09
P55012	Slc12a2	Solute carrier family 12 member 2	S12A2_MOUSE	3.53002	1.99609	1.66361	3.79659	5.59571	5.09486	7.00236	6.09697	Enrich	2.16467	0.000979253	0.00315703	NotSig	2.10833	0.0752826	0.15969	Enrich	4.86185	0.00948041	0.017789	Enrich	2.32564	0.0146754	0.0483301	1.41405	0.00613698	0.0247556
P55066	Ncan	Neurocan core protein	NCAN_MOUSE	0	0	0	1.18092	1.33673	0.389322	2.63331	0	NotSig	inf	0.391002	0.443422	NotSig	inf	0.391002	0.454376	Enrich	inf	0.00183923	0.00433586	NotSig	#NAME?	0.183024	0.264787	-0.851841	0.406532	0.483164	5.44686	-0.921306	0.403504	-0.762179	0.0288592
P55088;P55088-3	Aqp4	Aquaporin-4;Isoform 3 of Aquaporin-4	AQP4_MOUSE	6.29983	6.48486	4.4604	7.40603	6.57104	7.65472	8.22225	8.0104	NotSig	-2.06066	0.865882	0.890159	NotSig	0.186761	0.474375	0.530853	NotSig	2.78725	0.121957	0.153867	NotSig	-0.0962612	0.720536	0.773359	2.79932	0.198437	0.286423
P55096	Abcd3	ATP-binding cassette sub-family D member 3	ABCD3_MOUSE	4.18243	3.8954	3.99087	5.85056	5.38895	4.92443	4.85681	6.03833	Enrich	1.18196	0.022253	0.0432173	NotSig	1.01062	0.0514987	0.14253	Enrich	0.879482	0.024456	0.0387663	NotSig	0.156242	0.566909	0.640765	-0.553296	0.0547763	0.11115	5.88133	-0.490768	0.910577	-0.656323	0.0466266
P55097	Ctsk	Cathepsin K	CATK_MOUSE	4.91891	2.27351	4.07069	4.82818	5.24314	3.86085	3.61888	3.11472	NotSig	0.205613	0.480575	0.535098	NotSig	1.65978	0.441515	0.501037	NotSig	-2.57865	0.80122	0.818042	NotSig	-2.54568	0.148568	0.2212	-1.68749	0.00162488	0.0108101	0.718519	-3.66062	1.93022e-06	-0.053851	1
P55258	Rab8a	Ras-related protein Rab-8A	RAB8A_MOUSE	0.473648	0	0	0	0	0	2.48312	2.34181	NotSig	#NAME?	0.391002	0.443422	NotSig				Enrich	inf	0.000494151	0.00141914	NotSig	inf	0.0590409	0.101418	inf	0.000494151	0.00603406	5.39508	-0.903633	0.696883	-0.355342	0.427169
P55288	Cdh11	Cadherin-11	CAD11_MOUSE	0	0	0	0	3.25099	1.21536	4.20133	4.98391	NotSig	inf	0.0582818	0.0966099	NotSig	inf	0.391002	0.454376	Enrich	inf	0.000415968	0.00124184	Enrich	inf	0.00772734	0.0340433	0.316194	0.451522	0.525625	7.18367	1.48376	5.58128e-23	0.987938	1.84856e-16
P55302	Lrpap1	Alpha-2-macroglobulin receptor-associated protein	AMRP_MOUSE	3.43421	4.52139	3.09831	8.13993	4.32087	4.60337	4.19975	7.86316	NotSig	0.107346	0.502933	0.556118	NotSig	0.203411	0.894598	0.917714	NotSig	1.0647	0.422019	0.453642	NotSig	-0.339871	0.367646	0.480452	0.43305	0.880872	0.904308	6.65445	-0.296044	0.330612	-0.97567	3.46965e-08
P55821	Stmn2	Stathmin-2	STMN2_MOUSE	0	0	0	0	5.22828	5.47911	7.30042	6.2468	Enrich	inf	9.54899e-05	0.000527304	Enrich	inf	0.000228649	0.0033838	Enrich	inf	0.000106109	0.000590983	NotSig	inf	0.0198463	0.0543047	2.13047	0.00107478	0.00881133	10.2784	2.12781	2.21106e-154	2.41311	1.74551e-223
P56135	Atp5mf	ATP synthase subunit f, mitochondrial	ATPK_MOUSE	6.48361	6.92005	6.29322	8.18221	6.52288	7.62446	8.64236	8.99689	NotSig	-0.684183	0.965723	0.972441	NotSig	0.557235	0.394776	0.457961	NotSig	3.07273	0.129848	0.162112	NotSig	0.761352	0.542671	0.619644	3.45532	0.138761	0.217301
P56212	Arpp19	cAMP-regulated phosphoprotein 19	ARP19_MOUSE	0	2.44493	3.41793	1.3154	5.80567	5.61578	6.41774	5.17743	Enrich	inf	0.000179603	0.000800501	NotSig	1.38305	0.121886	0.22752	NotSig	2.28825	0.0813487	0.107355	Enrich	3.74768	0.0148205	0.0484989	0.679257	0.227771	0.316148	6.17075	-1.83874	8.23771e-11	-3.90887	1.26949e-199
P56371	Rab4a	Ras-related protein Rab-4A	RAB4A_MOUSE	0	0	0	1.41157	6.12466	3.70932	5.65164	4.86735	Enrich	inf	2.19041e-05	0.000233474	NotSig	inf	0.0578851	0.145715	Enrich	inf	1.86154e-06	0.000366048	NotSig	3.21398	0.0224716	0.0575823	-0.496317	0.0296053	0.0712793	5.80063	-0.092599	0.236737	0.383687	0.014741
P56375	Acyp2	Acylphosphatase-2	ACYP2_MOUSE	3.82749	6.36805	4.06143	4.8844	6.1112	5.7525	7.64547	6.45894	NotSig	1.45016	0.172066	0.237661	NotSig	-0.732445	0.204562	0.301961	NotSig	2.42736	0.0886804	0.116016	Enrich	1.50572	0.0152436	0.0489712	1.61982	0.0103427	0.0355064	5.00352	-0.64198	0.064346	-0.964852	0.0312133
P56379	Atp5mpl	ATP synthase subunit ATP5MPL, mitochondrial	ATP68_MOUSE	0.726417	0.810539	0.677617	1.89269	0	0	2.39138	3.36948	NotSig	#NAME?	0.391002	0.443422	NotSig	#NAME?	0.391002	0.454376	NotSig	2.41532	0.181831	0.21919	NotSig	0.681383	0.338588	0.44726	inf	0.0759267	0.138779
P56383;P56384;Q9CR84	Atp5mc2;Atp5mc3;Atp5mc1	ATP synthase F(0) complex subunit C2, mitochondrial;ATP synthase F(0) complex subunit C3, mitochondrial;ATP synthase F(0) complex subunit C1, mitochondrial	AT5G2_MOUSE;AT5G3_MOUSE;AT5G1_MOUSE	4.44623	6.21583	6.42554	6.61083	6.6096	4.69463	8.33497	8.2526	NotSig	1.08703	0.24528	0.312712	NotSig	-1.28272	0.437801	0.497459	NotSig	1.60898	0.105768	0.135469	Enrich	1.56806	0.00933932	0.0383813	1.96603	0.0310576	0.0741589
P56387	Dynlt3	Dynein light chain Tctex-type 3	DYLT3_MOUSE	0	0	0	2.79333	7.35705	6.98979	6.63578	5.60047	Enrich	inf	4.87702e-05	0.000363464	Enrich	inf	5.92196e-05	0.00270019	Enrich	inf	7.65723e-06	0.000563297	NotSig	2.35458	0.056675	0.0984024	-0.7587	0.0311776	0.0742007	7.11688	0.026419	1.26562e-05	-0.732702	0.00464518
P56389	Cda	Cytidine deaminase	CDD_MOUSE	0	0	0	0	2.14183	0	4.98416	4.08423	NotSig	inf	0.182537	0.245991	NotSig				Enrich	inf	0.000313459	0.00100933	NotSig	inf	0.0508295	0.0907536	1.78014	0.10339	0.172256	2.9529	0.112536	0.222082	5.43147	0.0001286
P56391	Cox6b1	Cytochrome c oxidase subunit 6B1	CX6B1_MOUSE	2.54113	5.39695	5.36311	6.01332	4.56306	7.44903	5.2388	6.43589	NotSig	1.51889	0.151909	0.212488	NotSig	0.893448	0.172557	0.288495	NotSig	-0.437326	0.856777	0.868584	NotSig	0.403561	0.366861	0.479873	0.445953	0.304795	0.396796	7.65413	-1.37609	1.01145e-11	-1.5045	9.07352e-40
P56395	Cyb5a	Cytochrome b5	CYB5_MOUSE	0	1.62231	0.983158	4.44929	0	5.63275	1.41439	2.29485	NotSig				NotSig	1.29307	0.0867942	0.176373	NotSig	-0.219078	0.747848	0.768472	NotSig	-0.925106	0.518936	0.597595	inf	0.182274	0.269392	4.94334	-2.58428	2.57646e-18	-2.51953	4.72413e-24
P56399	Usp5	Ubiquitin carboxyl-terminal hydrolase 5	UBP5_MOUSE	4.83098	5.06274	4.77481	5.27675	9.11146	7.91708	9.99618	9.48671	Enrich	4.24527	0.000417793	0.00156958	Enrich	2.83646	0.00361001	0.0176519	Enrich	5.26112	2.53629e-06	0.000366048	Enrich	4.16698	0.000919122	0.0136001	0.92112	0.0172156	0.0496129	7.85994	1.31852	3.02765e-28	1.3303	4.4162e-29
P56480	Atp5f1b	ATP synthase subunit beta, mitochondrial	ATPB_MOUSE	8.35053	8.70994	8.44906	9.79045	8.57817	8.98192	9.10764	10.1631	NotSig	0.0683311	0.659419	0.705056	NotSig	0.187793	0.447714	0.50699	Enrich	0.6591	0.004942	0.0102225	NotSig	0.322189	0.223101	0.312943	0.521646	0.024158	0.06209
P56546;P56546-2	Ctbp2	C-terminal-binding protein 2;Isoform 2 of C-terminal-binding protein 2	CTBP2_MOUSE	0	0	0	0	2.58918	0	5.69725	4.85332	NotSig	inf	0.059807	0.0966099	NotSig				Enrich	inf	0.000198088	0.000737112	NotSig	inf	0.0178952	0.0523994	2.79701	0.0333131	0.0776234	5.81435	-0.299153	0.0213261	1.51345	5.10876e-21
P56564	Slc1a3	Excitatory amino acid transporter 1	EAA1_MOUSE	5.67954	5.96059	5.23978	8.45453	6.94129	6.69808	9.43549	10.3313	NotSig	1.11573	0.0473214	0.0830464	NotSig	0.950339	0.311364	0.427141	Enrich	4.1364	0.000550534	0.00154397	Enrich	1.86421	0.000337288	0.0114227	2.57995	0.00126776	0.00968045	3.34817	-5.50389	2.15111e-36	-6.1296	7.5293e-39
P56565	S100a1	Protein S100-A1	S10A1_MOUSE	0.996559	0	0	0.692688	0.915547	1.07107	1.93204	2.10125	NotSig	-0.348724	0.954222	0.964038	NotSig	inf	0.391002	0.454376	NotSig	inf	0.20186	0.23872	NotSig	2.57976	0.62251	0.691377	1.55382	0.52439	0.595365	3.53918	-5.0802	4.69817e-47	-3.6515	9.64256e-14
P56695	Wfs1	Wolframin	WFS1_MOUSE	1.27473	2.14066	2.10784	5.34833	3.83286	3.47163	5.99013	6.01848	NotSig	2.49272	0.0348555	0.0632954	NotSig	1.05317	0.469371	0.526628	NotSig	2.90827	0.0463681	0.0670515	NotSig	0.585648	0.116335	0.177727	2.24085	0.0018213	0.0116415	4.41913	-1.23195	0.911524	-1.90077	3.24215e-19
P56812	Pdcd5	Programmed cell death protein 5	PDCD5_MOUSE	1.48648	2.92784	2.64969	0.799429	6.08043	6.12969	7.86319	5.87616	NotSig	2.18297	0.052187	0.0903741	NotSig	1.34896	0.153819	0.272772	NotSig	3.03544	0.0477148	0.0686528	Enrich	4.83317	0.00629288	0.0304463	1.86088	0.00605565	0.0246832	4.3215	-2.61041	4.24419e-11	-1.66393	6.09745e-06
P56873	Znrd2	Protein ZNRD2	ZNRD2_MOUSE	0	0	0	0	1.61432	0	4.11121	3.52394	NotSig	inf	0.184965	0.246554	NotSig				Enrich	inf	0.000243602	0.000836998	Enrich	inf	0.00379517	0.0230415	1.95755	0.0740698	0.13636
P56959	Fus	RNA-binding protein FUS	FUS_MOUSE	3.34735	3.5045	2.3377	0.970428	8.96919	6.73193	6.39153	5.51277	Enrich	4.9615	0.0136984	0.0285817	NotSig	1.91691	0.0928874	0.185357	NotSig	2.80588	0.0551329	0.0781504	NotSig	3.70263	0.0180652	0.0526776	-2.63001	0.000695795	0.00721732	7.81203	-0.591275	0.655568	-0.370933	0.0244954
P57716	Ncstn	Nicastrin	NICA_MOUSE	0	0	1.14476	4.85531	5.71709	3.11927	5.08726	5.29323	Enrich	inf	0.00022399	0.000943296	NotSig	inf	0.0596877	0.145715	NotSig	2.57967	0.038359	0.0571105	NotSig	0.392637	0.195915	0.280835	-0.676407	0.127579	0.202154	4.65736	-0.877957	0.636048	-0.186507	0.330613
P57724	Pcbp4	Poly(rC)-binding protein 4	PCBP4_MOUSE	0	0	0	0	0.845273	0	0	0	NotSig	inf	0.391002	0.443422	NotSig				NotSig								#NAME?	0.391002	0.469332	7.4027	0.118369	0.0404221	2.25842	4.01604e-53
P57746	Atp6v1d	V-type proton ATPase subunit D	VATD_MOUSE	0	0.929944	1.14481	2.85527	5.58505	4.78059	7.63309	5.97948	Enrich	inf	0.00046928	0.0017173	NotSig	3.16688	0.0227832	0.0768103	Enrich	5.16641	0.00915145	0.0172734	Enrich	3.31035	0.00198153	0.0170339	2.01378	0.00334285	0.0170021	7.6958	0.080086	0.000169794	-1.56708	6.60079e-52
P57759	Erp29	Endoplasmic reticulum resident protein 29	ERP29_MOUSE	7.10708	7.39491	6.32123	11.0895	7.8278	7.68105	5.97501	11.0385	NotSig	0.521199	0.24976	0.318214	NotSig	0.308013	0.496492	0.550737	NotSig	-0.504028	0.520779	0.549913	NotSig	-0.123582	0.866774	0.895114	-1.85198	0.000370756	0.00553077	6.95317	-0.557296	0.48678	-0.440605	0.860288
P57776	Eef1d	Elongation factor 1-delta	EF1D_MOUSE	0.933756	1.54061	0	0	5.69316	4.56031	5.53831	4.59189	Enrich	4.07014	0.0132658	0.027848	NotSig	2.06509	0.059217	0.145715	Enrich	inf	6.38821e-05	0.000569659	Enrich	inf	0.00594752	0.0296252	-0.156604	0.529788	0.600316	5.40756	-2.57055	1.44126e-17	-1.34633	0.0168185
P57780	Actn4	Alpha-actinin-4	ACTN4_MOUSE	6.02946	5.64183	6.79477	5.55995	8.12561	7.02538	7.58449	6.52533	Enrich	2.07612	0.000836469	0.00275814	NotSig	1.22212	0.0470411	0.132272	NotSig	-0.229242	0.464149	0.495587	NotSig	0.320215	0.282758	0.384535	-0.516006	0.0755151	0.138492	6.82904	-1.46578	1.19226e-05	-0.023777	0.0326997
P57787	Slc16a3	Monocarboxylate transporter 4	MOT4_MOUSE	0	0	0	1.43447	0	0	2.70561	1.94842	NotSig				NotSig				NotSig	inf	0.089163	0.116435	NotSig	1.13414	0.839333	0.872224	inf	0.089163	0.154825	5.38971	3.61287	2.98363e-09	3.44949	4.08467e-23
P58021	Tm9sf2	Transmembrane 9 superfamily member 2	TM9S2_MOUSE	1.47343	1.31161	0	4.43323	1.97291	2.49392	5.15387	5.25362	NotSig	-1.00994	0.798207	0.830522	NotSig	0.855462	0.569194	0.61874	Enrich	inf	0.00301956	0.00672602	NotSig	0.846723	0.0680649	0.114222	2.64268	0.0615298	0.120075	5.31509	-0.917365	0.0276372	-1.32324	1.26009e-05
P58252	Eef2	Elongation factor 2	EF2_MOUSE	6.31801	5.94324	6.7078	5.87471	8.60105	7.5938	6.8166	6.61231	Enrich	1.92217	0.0237822	0.0458895	Enrich	1.6413	0.0023546	0.0127302	NotSig	-0.0695041	0.843191	0.856324	NotSig	0.481392	0.241132	0.335389	-1.75605	0.00160334	0.0107161	8.08835	-0.650002	0.172808	0.210853	2.17986e-08
P58281;P58281-2	Opa1	Dynamin-like 120 kDa protein, mitochondrial;Isoform 2 of Dynamin-like 120 kDa protein, mitochondrial	OPA1_MOUSE	1.94753	3.10128	3.01744	5.06399	7.1093	4.56409	5.39702	6.6237	Enrich	5.04865	0.00496439	0.012244	NotSig	1.81153	0.0725339	0.155723	Enrich	2.44797	0.00217517	0.00501652	Enrich	1.55216	0.0023906	0.0184109	-1.70106	0.00162433	0.0108101	6.55004	0.296673	0.000334259	-0.665792	0.00250421
P58389	Ptpa	Serine/threonine-protein phosphatase 2A activator	PTPA_MOUSE	0.606854	2.08699	0	1.85414	5.38663	5.07103	6.00465	5.69383	Enrich	5.27	0.00216852	0.00610382	NotSig	1.95439	0.0884228	0.178863	Enrich	inf	3.20061e-05	0.000569659	NotSig	2.84085	0.0390593	0.076464	0.603042	0.0677886	0.128808
P58391	Kcnn3	Small conductance calcium-activated potassium channel protein 3	KCNN3_MOUSE	0	0	0	1.67604	5.03704	2.16024	6.25748	6.07187	Enrich	inf	5.26508e-05	0.000377049	NotSig	inf	0.181692	0.288495	Enrich	inf	0.000137325	0.000625657	NotSig	3.75668	0.0177322	0.0523584	1.28533	0.00879356	0.0316919	7.01518	3.14899	3.26434e-35	3.16837	4.12404e-50
P58404;P58404-2	Strn4	Striatin-4;Isoform 2 of Striatin-4	STRN4_MOUSE	0	0	0	0	2.24706	0.766818	3.32001	3.13584	NotSig	inf	0.0623907	0.0984928	NotSig	inf	0.391002	0.454376	Enrich	inf	0.00115595	0.00288888	NotSig	inf	0.0768979	0.125821	0.807145	0.265692	0.357113	5.83698	-0.282565	0.0791424	0.045281	0.231144
P58771	Tpm1	Tropomyosin alpha-1 chain	TPM1_MOUSE	5.1997	7.47566	9.76512	5.86725	7.7174	11.6222	7.98688	7.30264	Enrich	2.53701	0.000254642	0.0010578	NotSig	2.00087	0.0756877	0.160166	Deplete	-1.98895	0.0319989	0.0490673	NotSig	1.30618	0.028818	0.0651752	0.328254	0.522826	0.593822	7.13725	-1.49288	0.0347185	-2.2715	1.47849e-90
P58771-2	Tpm1	Isoform 2 of Tropomyosin alpha-1 chain	TPM1_MOUSE	0	2.75816	4.81913	0	0	7.14226	0	0	NotSig				NotSig	1.83579	0.0872274	0.176957	NotSig	#NAME?	0.0604748	0.0841427								7.13725	-1.49288	0.0347185	-2.2715	1.47849e-90
P58774-2	Tpm2	Isoform 2 of Tropomyosin beta chain	TPM2_MOUSE	1.39077	2.8393	6.18783	1.44921	1.05259	6.74169	3.66961	3.27814	NotSig	-1.40198	0.853118	0.879668	NotSig	2.01328	0.098637	0.192922	NotSig	-1.99229	0.142292	0.175661	NotSig	-0.543466	0.307162	0.412533	2.44773	0.164674	0.248973	2.546	-5.15507	3.28611e-07	-4.43573	6.2247e-11
P58871	Tnks1bp1	182 kDa tankyrase-1-binding protein	TB182_MOUSE	0	0	0	0	0.577319	0.431491	0.588028	0	NotSig	inf	0.391002	0.443422	NotSig	inf	0.391002	0.454376	NotSig	inf	0.2633	0.303865					-0.413722	0.988636	0.991033	4.52778	-0.455182	0.127312	2.70918	2.64995e-10
P59017	Bcl2l13	Bcl-2-like protein 13	B2L13_MOUSE	0	0	0	0	3.62367	0	5.83432	5.32346	NotSig	inf	0.0584193	0.0966099	NotSig				Enrich	inf	8.72161e-05	0.000580051	NotSig	inf	0.0191863	0.0539718	1.4598	0.165603	0.250002	5.13474	0.68604	0.0228453	0.468055	0.103645
P59108	Cpne2	Copine-2	CPNE2_MOUSE	0	0	0	4.3084	6.2666	5.40662	6.59276	5.86216	Enrich	inf	2.09679e-05	0.000227015	Enrich	inf	0.000184541	0.00316145	Enrich	inf	0.000125813	0.000605435	NotSig	0.40164	0.377722	0.489749	0.371976	0.312134	0.403087	5.3834	0.377985	3.47914e-05	1.07819	9.62345e-07
P59266	Fitm2	Fat storage-inducing transmembrane protein 2	FITM2_MOUSE	0	0	0	0	0.776269	0	2.31198	0	NotSig	inf	0.385718	0.443422	NotSig				NotSig	inf	0.0768482	0.10231					1.8562	0.23475	0.323355	5.4687	0.200137	0.00522722	1.85823	6.23258e-14
P59279	Rab2b	Ras-related protein Rab-2B	RAB2B_MOUSE	0	0	0	0	0.247519	0	2.22122	0	NotSig	inf	0.391002	0.443422	NotSig				Enrich	inf	0.00271834	0.00611679					3.97051	0.00125449	0.00965553	4.75234	0.063627	0.306126	0.467874	0.147559
P59325	Eif5	Eukaryotic translation initiation factor 5	IF5_MOUSE	0.974086	0.770044	0.908313	0	6.0646	5.19236	6.41164	5.55306	Enrich	4.26082	0.0129995	0.0273726	Enrich	4.38189	0.00558315	0.0250603	Enrich	4.90774	0.00791713	0.0152958	NotSig	inf	0.0314265	0.0684275	0.362904	0.132763	0.209277	8.38433	-0.112951	0.000454309	0.163394	0.00046771
P59326	Ythdf1	YTH domain-containing family protein 1	YTHD1_MOUSE	0	0	0.746647	0	5.41249	2.73032	4.17548	3.16743	Enrich	inf	0.000103551	0.00055294	NotSig	inf	0.0621827	0.145715	Enrich	3.34273	0.0162016	0.0276893	NotSig	inf	0.030211	0.0666392	-1.28507	0.00408888	0.0194946	5.62315	0.500829	0.0607407	0.280215	0.718853
P59328;P59328-2;P59328-3	Wdhd1	WD repeat and HMG-box DNA-binding protein 1;Isoform 2 of WD repeat and HMG-box DNA-binding protein 1;Isoform 3 of WD repeat and HMG-box DNA-binding protein 1	WDHD1_MOUSE	15.4641	15.4727	14.6942	15.6759	14.707	15.1426	14.3477	15.8373	NotSig	-0.710435	0.04593	0.0808109	NotSig	-0.249486	0.608777	0.657469	NotSig	-0.49562	0.587363	0.615016	NotSig	0.0959429	0.608332	0.678041	-0.309849	0.40279	0.480097	2.67585	3.81109	0.372449	0.862948	0.122583
P59481	Lman2l	VIP36-like protein	LMA2L_MOUSE	0.97088	3.37561	2.51894	5.6454	6.70372	6.28199	4.86867	5.51985	Enrich	4.98372	0.0073891	0.0171332	NotSig	-0.951318	0.305056	0.420876	NotSig	-2.69932	0.426344	0.457264	NotSig	-0.200262	0.679504	0.739081	-1.39091	0.06628	0.126443	5.6821	1.53436	1.58402e-05	1.1966	3.89055e-07
P59648	Fxyd7	FXYD domain-containing ion transport regulator 7	FXYD7_MOUSE	0	0	0	0	1.28691	0.940403	5.93403	5.28526	NotSig	inf	0.186389	0.247379	NotSig	inf	0.391002	0.454376	Enrich	inf	0.000468177	0.00135814	NotSig	inf	0.0305857	0.0671166	4.67802	0.00416968	0.0196853	6.73668	1.84142	2.01386e-18	1.04491	2.13896e-11
P59672;P59672-2	Anks1a	Ankyrin repeat and SAM domain-containing protein 1A;Isoform 2 of Ankyrin repeat and SAM domain-containing protein 1A	ANS1A_MOUSE	0	0	0	0	0.773716	0.932159	4.63994	4.68506	NotSig	inf	0.391002	0.443422	NotSig	inf	0.391002	0.454376	Enrich	inf	0.000213486	0.000774091	NotSig	inf	0.0233022	0.0585155	3.71651	0.0122379	0.0393517
P59999	Arpc4	Actin-related protein 2/3 complex subunit 4	ARPC4_MOUSE	2.49283	3.85536	5.16488	5.89872	5.74833	5.89393	7.45331	6.5813	NotSig	0.535045	0.150202	0.210206	NotSig	1.13426	0.254304	0.359622	Enrich	2.47453	0.0182606	0.0305124	NotSig	0.651811	0.338197	0.446955	2.03597	0.0434312	0.0944327	7.72553	0.315004	2.07586e-07	0.534264	6.04533e-12
P60122	Ruvbl1	RuvB-like 1	RUVB1_MOUSE	0.640712	0	0	0	5.81355	4.3203	4.83306	4.38624	Enrich	5.50509	0.00334817	0.00876901	Enrich	inf	1.77222e-06	0.00117852	Enrich	inf	0.000553149	0.00154828	Enrich	inf	0.00230851	0.0180256	-0.931503	0.0426225	0.0929537	4.09835	-0.210196	0.349154	-0.969187	0.000262264
P60202	Plp1	Myelin proteolipid protein	MYPR_MOUSE	13.0306	13.6847	12.1851	12.9329	12.9926	14.5096	15.0126	13.883	NotSig	-1.92202	0.978337	0.983703	NotSig	-0.0115742	0.546619	0.598356	NotSig	2.37657	0.144248	0.177761	NotSig	0.921645	0.666574	0.727101	3.40941	0.164127	0.248463	10.8366	-5.17364	3.33412e-174	-1.47146	3.95395e-232
P60229	Eif3e	Eukaryotic translation initiation factor 3 subunit E	EIF3E_MOUSE	0.928213	0	0	0.960995	7.15814	4.84579	4.31029	3.55898	Enrich	5.57745	0.0058813	0.0142123	Enrich	inf	0.00049057	0.00479389	Enrich	inf	6.18786e-05	0.000569659	NotSig	1.75747	0.0711547	0.118143	-2.92224	1.16933e-05	0.00192648	5.76019	-0.814299	0.302731	-0.964268	0.00013801
P60335	Pcbp1	Poly(rC)-binding protein 1	PCBP1_MOUSE	2.03021	1.14985	2.15123	4.54523	7.80184	6.9811	9.28651	7.95907	Enrich	4.37586	0.0195984	0.0387549	Enrich	4.58979	0.0102104	0.0401178	Enrich	6.08983	0.00944171	0.0177512	Enrich	3.38187	0.00466349	0.0261137	1.52445	0.003229	0.0167368	6.12114	-1.17036	1.41329e-06	-1.6744	2.27693e-25
P60469	Ppfia3	Liprin-alpha-3	LIPA3_MOUSE	0	0	0	1.93052	4.58352	4.07103	6.96378	6.62891	Enrich	inf	0.000141695	0.000680039	Enrich	inf	0.000248372	0.00347721	Enrich	inf	4.37796e-05	0.000569659	Enrich	4.71942	0.00336216	0.0216407	2.42802	0.000103563	0.00305829	6.20108	1.88828	4.2386e-11	1.50597	1.46401e-09
P60487	Pdxp	Pyridoxal phosphate phosphatase	PLPP_MOUSE	5.74152	5.19079	3.89586	5.58215	6.01747	5.5685	6.47574	6.28487	NotSig	0.0432118	0.637659	0.685253	NotSig	0.330177	0.354229	0.454376	NotSig	1.69325	0.1441	0.17774	NotSig	0.577394	0.144334	0.215466	0.464902	0.161401	0.24571
P60521	Gabarapl2	Gamma-aminobutyric acid receptor-associated protein-like 2	GBRL2_MOUSE	0.748999	0.748828	0.699412	2.02405	6.48014	5.48247	6.16881	5.84044	Enrich	5.72675	0.00265356	0.00724664	Enrich	4.66712	0.00698175	0.0297874	Enrich	5.62891	0.00245901	0.00558583	Enrich	3.76958	0.00817371	0.035132	-0.326991	0.401759	0.479065	5.94872	-1.62226	1.84061e-08	-0.715567	0.00490483
P60603	Romo1	Reactive oxygen species modulator 1	ROMO1_MOUSE	0	0	0	0	0	0	1.69958	1.944	NotSig				NotSig				NotSig	inf	0.205191	0.241664	NotSig	inf	0.5	0.580066	inf	0.205191	0.29275	5.9673	-1.36129	2.29597e-05	-1.72461	1.90047e-29
P60710	Actb	Actin, cytoplasmic 1	ACTB_MOUSE	6.1616	6.77187	6.32168	7.04547	9.24018	8.51934	10.5662	10.2729	Enrich	2.9516	0.00275526	0.00746498	NotSig	1.94939	0.0303683	0.0943688	Enrich	3.98383	0.0040726	0.00869367	Enrich	3.22556	0.0044878	0.0255894	1.32584	7.29732e-05	0.0026398	9.86914	-2.42801	7.09613e-120	-1.92938	1.2305e-228
P60761	Nrgn	Neurogranin	NEUG_MOUSE	3.54573	6.02782	7.35205	5.37805	5.74531	6.40376	7.47891	6.18066	NotSig	1.49814	0.163946	0.227702	NotSig	0.436492	0.305418	0.421031	NotSig	-0.0918128	0.835374	0.850191	NotSig	0.702296	0.0925214	0.146293	1.68024	0.00811552	0.0299571	6.98623	0.641625	1.21366e-17	-4.25751	3.59196e-209
P60764	Rac3	Ras-related C3 botulinum toxin substrate 3	RAC3_MOUSE	6.86012	7.07884	5.00715	7.44174	9.59363	8.60243	10.7887	10.132	Enrich	2.567	0.0072756	0.0168986	Enrich	1.53206	0.00337854	0.0168294	NotSig	4.38436	0.0424594	0.0622781	Enrich	2.6809	0.000228852	0.0113696	1.19345	1.96651e-05	0.00217623	6.50705	2.68363	2.95605e-16	4.23676	9.37128e-45
P60766	Cdc42	Cell division control protein 42 homolog	CDC42_MOUSE	4.14352	4.73707	4.62837	4.9524	7.78144	6.76261	8.37456	7.72826	Enrich	3.60718	0.00107965	0.00339319	Enrich	2.08816	0.000470199	0.00464955	Enrich	3.70559	0.000400884	0.00120813	Enrich	2.77495	0.00763104	0.0338876	0.598537	0.00929788	0.0330566	7.99991	-0.703562	0.409084	-1.07211	5.39445e-22
P60766-1	Cdc42	Isoform 1 of Cell division control protein 42 homolog	CDC42_MOUSE	0.937634	0	0.776939	3.21547	7.12367	6.15904	8.4964	8.03873	Enrich	5.48718	0.0066321	0.0157091	Enrich	inf	0.000187082	0.00316145	Enrich	7.60206	0.00140388	0.00340181	NotSig	4.08214	0.0199562	0.0543047	1.40558	0.00223715	0.0132399	7.99991	-0.703562	0.409084	-1.07211	5.39445e-22
P60824	Cirbp	Cold-inducible RNA-binding protein	CIRBP_MOUSE	0	0	0	0	6.55801	4.67448	0	0	Enrich	inf	0.000481226	0.0017478	Enrich	inf	0.000567262	0.00506379	NotSig								#NAME?	0.000481226	0.00596119	5.31044	-0.389962	0.336156	-0.319765	0.390612
P60840;P60840-2	Ensa	Alpha-endosulfine;Isoform 2 of Alpha-endosulfine	ENSA_MOUSE	0	0	0	0	7.25717	6.5561	7.76611	6.3938	Enrich	inf	0.000140101	0.000675924	Enrich	inf	1.31781e-06	0.00116846	Enrich	inf	0.000143724	0.000637365	Enrich	inf	0.0130039	0.0456925	0.514339	0.278431	0.369793	7.48611	0.67503	1.888e-16	-1.24961	2.66908e-31
P60843	Eif4a1	Eukaryotic initiation factor 4A-I	IF4A1_MOUSE	5.80784	4.88163	4.29439	5.5085	9.92725	7.54726	7.11241	5.71869	Enrich	3.92057	0.00133385	0.00405314	Enrich	2.71249	0.00126109	0.00837154	NotSig	1.25439	0.169963	0.206621	NotSig	0.00552826	0.684917	0.74336	-2.79436	0.000209679	0.00415625	6.07128	-0.833227	0.030415	-0.440022	0.00115642
P60879	Snap25	Synaptosomal-associated protein 25	SNP25_MOUSE	4.58008	4.74254	4.1405	5.26701	6.91194	6.88197	9.77175	9.35882	Enrich	2.34907	0.000562913	0.00198718	Enrich	2.20231	0.000830413	0.00627528	Enrich	5.66989	1.19539e-05	0.000569659	Enrich	4.11009	0.00313883	0.0210083	2.87492	6.09121e-05	0.00242592	10.3972	2.08106	2.08817e-160	0.200555	3.09219e-08
P60879-2	Snap25	Isoform 2 of Synaptosomal-associated protein 25	SNP25_MOUSE	0	0	0	0	0.81897	2.29049	6.26147	5.33835	NotSig	inf	0.205821	0.26749	NotSig	inf	0.0623046	0.145715	Enrich	inf	7.82032e-05	0.000569659	NotSig	inf	0.0599131	0.10263	6.09937	0.000612064	0.00677291	10.3972	2.08106	2.08817e-160	0.200555	3.09219e-08
P60904	Dnajc5	DnaJ homolog subfamily C member 5	DNJC5_MOUSE	1.62443	1.7719	1.93036	4.9915	5.56052	5.86937	8.9548	8.1462	Enrich	3.27209	0.0263776	0.0499577	NotSig	3.41662	0.0256572	0.0844657	Enrich	6.20975	0.00757988	0.0147635	Enrich	3.14347	0.000573889	0.0129938	3.41521	4.09307e-06	0.00169219	9.61841	1.68134	2.03554e-90	1.67378	1.04904e-114
P61014	Pln	Cardiac phospholamban	PPLA_MOUSE	0	1.51047	1.68887	0	0	4.97515	0	0	NotSig				NotSig	1.74465	0.104989	0.202958	NotSig	#NAME?	0.197139	0.234103								1.74644	-3.29148	0.0188192	-2.92398	0.512229
P61021	Rab5b	Ras-related protein Rab-5B	RAB5B_MOUSE	1.09309	0	1.09194	3.33345	7.32433	6.10349	7.08374	6.65238	Enrich	5.02566	0.0103236	0.0226214	Enrich	inf	0.000305566	0.00388902	Enrich	4.81892	0.0103894	0.0190949	NotSig	2.66	0.0565413	0.0982308	-0.211599	0.358951	0.452441	5.63922	0.551607	0.00881302	1.52744	4.21066e-09
P61027	Rab10	Ras-related protein Rab-10	RAB10_MOUSE	2.28034	2.13124	1.94869	4.26152	5.23494	4.36895	5.83001	5.47558	NotSig	1.66945	0.11139	0.161839	NotSig	1.35881	0.17014	0.288495	NotSig	3.06868	0.0379812	0.0566068	NotSig	1.24042	0.0175433	0.0521293	0.660612	0.0835893	0.147325	6.70196	-1.55155	1.84747e-09	-0.826039	3.41522e-05
P61028	Rab8b	Ras-related protein Rab-8B	RAB8B_MOUSE	0	0	0	0	1.17055	0	2.77109	2.93344	NotSig	inf	0.192447	0.252857	NotSig				Enrich	inf	0.000383626	0.00116468	NotSig	inf	0.0709291	0.117838	1.4677	0.103342	0.172256	4.73972	-1.11242	0.886241	0.11458	0.390612
P61079;P62838	Ube2d3;Ube2d2	Ubiquitin-conjugating enzyme E2 D3;Ubiquitin-conjugating enzyme E2 D2	UB2D3_MOUSE;UB2D2_MOUSE	0	0	0	0	4.12498	2.10984	5.5874	5.00362	NotSig	inf	0.0583258	0.0966099	NotSig	inf	0.184269	0.288495	Enrich	inf	0.000358683	0.00110779	NotSig	inf	0.0781896	0.127356	0.575109	0.371201	0.462756
P61082	Ube2m	NEDD8-conjugating enzyme Ubc12	UBC12_MOUSE	0	0.489214	0	2.83787	6.09001	5.11496	7.3561	6.6984	Enrich	inf	0.000134865	0.000656467	Enrich	5.64719	0.000464384	0.00464955	Enrich	inf	0.000101291	0.000590983	Enrich	3.93817	0.000533333	0.0125983	1.27974	0.0122883	0.0393824	7.60215	1.10756	6.14368e-16	2.09523	2.41575e-45
P61087	Ube2k	Ubiquitin-conjugating enzyme E2 K	UBE2K_MOUSE	0	0	0	0	5.31618	4.45715	6.22091	5.74431	Enrich	inf	0.000158777	0.000735079	Enrich	inf	0.000448127	0.00461916	Enrich	inf	6.55307e-05	0.000569659	NotSig	inf	0.0451559	0.0840617	0.904801	0.0222163	0.0589945	7.17576	-0.332646	0.279138	-1.02255	4.8903e-12
P61089	Ube2n	Ubiquitin-conjugating enzyme E2 N	UBE2N_MOUSE	3.3904	4.99625	4.16228	4.90988	6.94694	6.6599	8.19045	7.84487	NotSig	2.82292	0.0530028	0.0914989	Enrich	1.66126	0.00732949	0.0308977	Enrich	3.8209	0.00304379	0.00676424	Enrich	2.85397	0.00335147	0.0216407	1.27467	0.0123708	0.0395592	5.69285	0.69318	0.000576723	0.275827	0.806481
P61148	Fgf1	Fibroblast growth factor 1	FGF1_MOUSE	0	0	0	0	3.35278	3.16178	5.95518	4.80479	NotSig	inf	0.0562727	0.0965376	Enrich	inf	0.00211042	0.0117815	Enrich	inf	0.00032721	0.00103995	NotSig	inf	0.052761	0.0928842	1.4612	0.0963231	0.163687	6.33533	-1.01614	0.364275	2.33093	4.57968e-33
P61161	Actr2	Actin-related protein 2	ARP2_MOUSE	0.792533	1.20005	2.26852	4.424	6.99432	5.67346	7.4469	7.34081	Enrich	6.00345	0.00362367	0.00939217	NotSig	2.96177	0.0310783	0.0964625	Enrich	3.96069	0.0278831	0.0435237	NotSig	3.00139	0.0493492	0.0889275	0.473014	0.116583	0.188486	7.20502	0.167021	1.67706e-07	-0.900052	5.68243e-14
P61164	Actr1a	Alpha-centractin	ACTZ_MOUSE	0.456255	0	0	1.38596	7.03213	5.88467	7.18907	6.25601	Enrich	7.7027	0.000257611	0.00106852	Enrich	inf	0.000261439	0.00351264	Enrich	inf	7.05488e-05	0.000569659	NotSig	2.76026	0.0360245	0.0731068	0.179006	0.596788	0.664016
P61202;P61202-2	Cops2	COP9 signalosome complex subunit 2;Isoform 2 of COP9 signalosome complex subunit 2	CSN2_MOUSE	0	0	0	1.13705	6.09171	4.47441	7.40247	6.60796	Enrich	inf	2.16824e-05	0.000232916	Enrich	inf	0.00152507	0.00932571	Enrich	inf	5.06276e-05	0.000569659	Enrich	4.13445	0.014602	0.048268	1.34747	0.00320021	0.0166273	6.17296	-0.89906	0.148767	-0.493541	0.120649
P61205;P84078	Arf3;Arf1	ADP-ribosylation factor 3;ADP-ribosylation factor 1	ARF3_MOUSE;ARF1_MOUSE	2.77941	3.85378	5.17328	5.69634	8.11117	7.37906	10.0802	8.9075	NotSig	2.93044	0.0521421	0.0903741	NotSig	2.2099	0.0865477	0.176222	Enrich	4.70676	0.0020886	0.00484414	Enrich	3.17542	0.000389905	0.0114913	1.92521	0.00226249	0.0133335
P61211	Arl1	ADP-ribosylation factor-like protein 1	ARL1_MOUSE	0.871658	0.525252	0.829615	0.956291	6.37201	4.45255	5.72584	4.55994	Enrich	5.05025	0.00635379	0.0151675	Enrich	4.72458	0.00201898	0.0113781	Enrich	4.53262	0.00969246	0.0181157	NotSig	2.77878	0.0325026	0.0695897	-0.703377	0.0505946	0.105187	6.75415	-0.203085	0.406022	-0.158962	0.355406
P61226	Rap2b	Ras-related protein Rap-2b	RAP2B_MOUSE	0.929335	0	1.62716	2.12935	5.74261	4.54166	6.22205	6.12311	Enrich	4.14971	0.0122355	0.0260028	Enrich	inf	0.000388246	0.00435991	Enrich	4.12077	0.0152162	0.0262825	NotSig	2.86543	0.0472481	0.0868069	0.472346	0.0910345	0.157192	4.23848	-1.9471	0.0114727	-3.30748	2.26213e-56
P61255	Rpl26	60S ribosomal protein L26	RL26_MOUSE	5.8293	6.03191	4.04259	3.84029	8.27859	6.50517	4.55367	4.79293	Enrich	2.43028	0.00457368	0.0113517	NotSig	0.356184	0.34706	0.454376	NotSig	0.382212	0.33797	0.383255	NotSig	0.931632	0.295102	0.398431	-3.88059	0.000307486	0.00499924	7.41855	-2.32973	1.22994e-40	-1.06946	3.3341e-09
P61264	Stx1b	Syntaxin-1B	STX1B_MOUSE	7.02645	6.85028	5.89875	7.47307	8.57198	8.03117	9.81221	10.0465	Enrich	1.44489	0.0209681	0.0410407	Enrich	1.23343	0.00897796	0.0361473	Enrich	3.80082	0.00131137	0.00320353	Enrich	2.56714	0.000148544	0.0113696	1.24583	0.000303697	0.00499375	7.76453	1.63664	2.05466e-28	1.50976	6.80192e-32
P61290	Psme3	Proteasome activator complex subunit 3	PSME3_MOUSE	0	0	0	0	3.26503	0	0	0	NotSig	inf	0.0727121	0.110719	NotSig				NotSig								#NAME?	0.0727121	0.134631	5.78965	0.999091	1.02026e-05	0.391157	0.0813828
P61294	Rab6b	Ras-related protein Rab-6B	RAB6B_MOUSE	0	1.87437	0	4.68789	6.88466	6.49152	8.60256	7.66447	Enrich	inf	5.93778e-05	0.000400661	NotSig	3.73619	0.0231501	0.0778498	Enrich	inf	4.22199e-05	0.000569659	Enrich	2.90728	0.00226273	0.0177712	1.73441	0.00149967	0.0104579	9.53394	1.90038	6.59955e-97	0.79209	1.08971e-38
P61329;P61329-2	Fgf12	Fibroblast growth factor 12;Isoform 2 of Fibroblast growth factor 12	FGF12_MOUSE	1.314	0	2.52387	1.37401	5.8762	6.12221	5.86765	5.23287	NotSig	2.76307	0.0362831	0.0656006	Enrich	inf	0.000597903	0.00518053	NotSig	1.8083	0.106167	0.135858	NotSig	1.73097	0.0672994	0.113145	-0.0684851	0.984863	0.987935	5.26328	0.642168	0.00152029	-0.453611	0.000919397
P61358	Rpl27	60S ribosomal protein L27	RL27_MOUSE	5.94206	6.03733	5.22787	4.69672	7.64291	6.91019	7.70313	6.71102	Enrich	1.70449	0.000690067	0.00234862	NotSig	0.806928	0.0733195	0.156777	Enrich	2.45875	0.000456343	0.00133597	NotSig	2.25347	0.253519	0.349851	0.0546856	0.790566	0.835609	1.60994	-1.01313	0.090136	-2.11288	0.0514495
P61514	Rpl37a	60S ribosomal protein L37a	RL37A_MOUSE	4.18326	4.4905	1.74066	0	3.93187	3.50876	3.41765	0	NotSig	-0.278363	0.544176	0.596209	NotSig	-0.101744	0.499611	0.553044	NotSig	0.825755	0.202667	0.23928					-0.616169	0.152718	0.233721	7.29098	-1.97082	2.3073e-18	-0.079592	0.017701
P61620	Sec61a1	Protein transport protein Sec61 subunit alpha isoform 1	S61A1_MOUSE	2.67909	2.70636	3.62644	5.70219	3.91726	5.21813	5.2192	5.7016	NotSig	0.433323	0.566299	0.617985	NotSig	0.830948	0.206425	0.303533	NotSig	1.74599	0.329454	0.374042	NotSig	0.0211928	0.998678	0.999033	1.31153	0.444764	0.519722	7.1493	0.016589	0.00757098	0.289775	1.37315e-05
P61750	Arf4	ADP-ribosylation factor 4	ARF4_MOUSE	1.29825	1.29632	1.24008	1.11404	5.66973	4.65902	6.41477	4.94002	NotSig	2.50657	0.0427434	0.0756899	NotSig	1.68114	0.0748519	0.15903	Enrich	3.66926	0.0202121	0.0330608	NotSig	2.57501	0.0364514	0.0734515	0.922867	0.152139	0.232958	5.67245	-1.56275	0.0748371	-1.34337	1.26553e-10
P61759	Vbp1	Prefoldin subunit 3	PFD3_MOUSE	0	0	0	0	4.80578	4.01684	5.22768	4.91319	Enrich	inf	0.000184813	0.000819737	Enrich	inf	0.00110197	0.00769357	Enrich	inf	0.00121607	0.00301809	Enrich	inf	0.00302606	0.0207659	0.557153	0.426051	0.500809	5.89217	-0.734913	0.139467	-0.41881	0.749781
P61804	Dad1	Dolichyl-diphosphooligosaccharide--protein glycosyltransferase subunit DAD1	DAD1_MOUSE	2.38246	2.53903	3.56476	4.68037	4.86288	5.26853	5.63288	5.40779	NotSig	0.750277	0.18473	0.246554	NotSig	1.13799	0.17473	0.288495	NotSig	1.42813	0.214437	0.251727	NotSig	0.772775	0.641756	0.707997	1.19678	0.309588	0.40159	6.63665	-1.21607	2.71202e-06	-0.977279	1.52603e-07
P61922	Abat	4-aminobutyrate aminotransferase, mitochondrial	GABT_MOUSE	5.8613	6.32907	5.62055	7.58721	7.53766	6.87121	7.57846	8.60197	NotSig	1.32303	0.088741	0.132198	NotSig	0.549692	0.249722	0.354272	Enrich	1.78997	0.0193937	0.0319406	NotSig	0.962294	0.0194242	0.0540257	0.0528482	0.831764	0.86712	7.33078	-0.151063	4.50098e-07	-0.45286	0.0336824
P61924	Copz1	Coatomer subunit zeta-1	COPZ1_MOUSE	0	0	0	0	1.12151	0	1.63594	0	NotSig	inf	0.391002	0.443422	NotSig				NotSig	inf	0.247168	0.286747					0.482562	0.758734	0.807271	6.65142	0.326607	3.5751e-05	0.029057	0.00481708
P61957	Sumo2	Small ubiquitin-related modifier 2	SUMO2_MOUSE	0.87694	4.02346	5.24095	1.8426	2.99341	6.78986	4.86752	4.58171	NotSig	2.11446	0.163519	0.227339	NotSig	1.10537	0.176199	0.288495	NotSig	-0.533921	0.469347	0.500579	NotSig	1.75707	0.0883519	0.140717	1.36945	0.156566	0.23923	1.03836	-1.14615	1	10.8847	0.135034
P61961	Ufm1	Ubiquitin-fold modifier 1	UFM1_MOUSE	1.61309	3.09508	1.91897	1.84059	4.80632	5.33313	5.80509	5.15072	NotSig	2.5746	0.0432773	0.0765354	NotSig	1.39561	0.13934	0.253346	NotSig	3.06242	0.0379075	0.0565325	NotSig	2.50852	0.052067	0.0920444	1.01364	0.00689678	0.0267039	5.20666	-1.15653	0.0684939	-0.686701	0.190821
P61967	Ap1s1	AP-1 complex subunit sigma-1A	AP1S1_MOUSE	0	0	0	0	0	0	1.2688	1.39931	NotSig				NotSig				NotSig	inf	0.391002	0.422677	NotSig	inf	0.5	0.580066	inf	0.391002	0.469332	7.15015	0.190305	0.000706038	-1.12161	2.08812e-22
P61971	Nutf2	Nuclear transport factor 2	NTF2_MOUSE	1.46624	1.2945	5.05871	4.82927	2.51808	5.4394	4.88806	4.58656	NotSig	0.199569	0.629541	0.677588	NotSig	2.41895	0.0444204	0.126915	NotSig	-1.97713	0.932308	0.937866	NotSig	-0.643343	0.802129	0.840397	0.970851	0.203842	0.291606	5.50173	1.71738	1.87551e-06	1.79416	7.9174e-12
P61979-3	Hnrnpk	Isoform 3 of Heterogeneous nuclear ribonucleoprotein K	HNRPK_MOUSE	4.69574	5.28821	5.47513	2.2551	9.12011	7.21338	7.31811	5.98715	Enrich	4.30431	0.000891129	0.00289726	Enrich	1.82204	0.0093238	0.0371834	Enrich	1.86489	0.000949953	0.00244651	NotSig	2.14323	0.0717321	0.118821	-1.81714	0.00120393	0.00941672	7.18632	-1.11977	5.09388e-05	-0.8461	1.10941e-08
P61982	Ywhag	14-3-3 protein gamma	1433G_MOUSE	6.64491	6.62993	6.84545	7.98984	11.5113	9.94306	11.2564	10.9796	Enrich	4.55473	0.00390719	0.0100325	Enrich	3.50958	0.00275541	0.0142873	Enrich	4.35511	0.000136534	0.000623905	Enrich	2.91663	0.000737101	0.0131974	-0.283392	0.344012	0.435699	10.2043	2.1445	3.61294e-145	2.10208	5.55791e-191
P62069;Q9D9M2;Q9D9M2-2	Usp46;Usp12;Usp12	Ubiquitin carboxyl-terminal hydrolase 46;Ubiquitin carboxyl-terminal hydrolase 12;Isoform 2 of Ubiquitin carboxyl-terminal hydrolase 12	UBP46_MOUSE;UBP12_MOUSE;UBP12_MOUSE	0	0	0	1.3589	5.8922	3.47061	6.02759	5.61761	Enrich	inf	1.82611e-07	8.36969e-05	NotSig	inf	0.058919	0.145715	Enrich	inf	9.88018e-05	0.000590983	Enrich	4.02268	0.0121245	0.0442623	0.181473	0.573993	0.643352
P62071	Rras2	Ras-related protein R-Ras2	RRAS2_MOUSE	0	1.27683	0	1.05404	5.04923	3.89961	5.73447	4.99571	Enrich	inf	5.00848e-05	0.000366311	NotSig	1.06146	0.131676	0.241853	Enrich	inf	0.000195722	0.000733061	NotSig	2.8362	0.0302218	0.0666392	0.741195	0.0701746	0.131617	3.39995	-0.982471	0.210734	1.62195	0.000108466
P62075	Timm13	Mitochondrial import inner membrane translocase subunit Tim13	TIM13_MOUSE	0	1.64212	2.15286	0	3.39354	5.4933	1.28765	0.812191	NotSig	inf	0.0585257	0.0966099	NotSig	1.25088	0.0964263	0.190277	NotSig	-1.94856	0.584505	0.612247	NotSig	inf	0.5	0.580066	-2.66617	0.182811	0.269392	6.50426	-1.26123	9.37381e-06	-1.30128	8.49515e-17
P62082	Rps7	40S ribosomal protein S7	RS7_MOUSE	2.4079	1.06065	1.05095	1.5074	3.93135	3.22121	2.26274	0	NotSig	-0.282716	0.374175	0.443422	NotSig	1.72274	0.2075	0.304318	NotSig	0.343138	0.392806	0.424147	NotSig	#NAME?	0.391002	0.49801	-1.40178	0.11932	0.191628	2.27466	-4.66601	1.26985e-09	-1.1936	0.777513
P62137	Ppp1ca	Serine/threonine-protein phosphatase PP1-alpha catalytic subunit	PP1A_MOUSE	0	2.00597	3.41351	4.07011	6.5178	4.98479	6.61413	6.03204	Enrich	inf	6.96269e-07	9.5355e-05	NotSig	2.04682	0.0809216	0.167641	NotSig	2.29905	0.0783544	0.104073	NotSig	1.80861	0.0262252	0.0619352	0.115637	0.560705	0.630167
P62141	Ppp1cb	Serine/threonine-protein phosphatase PP1-beta catalytic subunit	PP1B_MOUSE	3.98959	2.8156	2.41968	4.90197	7.93071	6.10057	9.0466	8.15465	Enrich	3.781	0.00412783	0.0104529	NotSig	2.26773	0.0699926	0.151911	Enrich	5.28357	0.0170611	0.0288996	Enrich	3.23675	0.000802609	0.0133755	1.14181	0.00264995	0.0148355	7.22822	-0.253287	0.220012	-0.96804	4.99854e-12
P62192	Psmc1	26S proteasome regulatory subunit 4	PRS4_MOUSE	0.543876	0.761728	1.10765	0	7.7929	5.68319	6.08852	6.09343	Enrich	7.99652	0.0004809	0.0017478	Enrich	4.81518	0.00644681	0.0279292	Enrich	3.799	0.0166025	0.0282685	NotSig	inf	0.0186578	0.0534084	-1.64997	0.00727133	0.027835	8.60943	-0.300426	0.302321	-0.285581	0.0780797
P62196	Psmc5	26S proteasome regulatory subunit 8	PRS8_MOUSE	0.815437	0	1.26503	0.94371	6.31631	4.43051	5.23301	5.63754	Enrich	5.21316	0.005907	0.0142619	Enrich	inf	0.000376426	0.00431591	NotSig	2.22479	0.0497166	0.0711761	Enrich	3.9478	0.0148445	0.0485209	-1.07507	0.0082711	0.0302229	7.1003	-0.488758	0.406022	-0.431622	0.157924
P62242	Rps8	40S ribosomal protein S8	RS8_MOUSE	5.62371	5.6747	4.51138	4.55644	5.92037	6.01472	5.09114	4.42642	NotSig	0.327211	0.358292	0.438887	NotSig	0.316678	0.346531	0.454376	NotSig	0.575914	0.102294	0.131605	NotSig	-0.424031	0.83234	0.8672	-0.871292	0.0335255	0.0780447	8.12859	-1.1427	8.67108e-06	0.426837	5.53028e-15
P62245	Rps15a	40S ribosomal protein S15a	RS15A_MOUSE	3.27379	4.41501	3.27775	2.95834	4.81113	4.97394	5.26436	3.37345	NotSig	0.339993	0.320061	0.397547	NotSig	0.646997	0.333934	0.452273	NotSig	1.63979	0.243404	0.282837	NotSig	-0.662993	0.737057	0.785989	1.231	0.613949	0.68009	6.84239	-1.99488	2.88268e-19	-0.429071	0.713079
P62257	Ube2h	Ubiquitin-conjugating enzyme E2 H	UBE2H_MOUSE	6.35241	6.44983	6.08907	7.52789	7.85589	7.19456	8.80352	9.45383	Enrich	1.43558	0.0192431	0.0381532	NotSig	0.793147	0.143735	0.259034	Enrich	2.45766	0.0182911	0.0305454	NotSig	1.91869	0.023985	0.059246	0.920084	0.0226556	0.0594195	6.19941	0.103152	0.0286118	0.575953	4.88825e-07
P62259	Ywhae	14-3-3 protein epsilon	1433E_MOUSE	5.92381	6.15388	5.90055	6.47607	9.28611	7.8406	9.58099	9.37935	Enrich	3.34861	0.000177759	0.000796153	Enrich	1.70218	0.00160545	0.00966177	Enrich	3.70839	1.22059e-05	0.000569659	Enrich	2.83576	0.00104034	0.014224	0.287689	0.361377	0.454311	9.08392	-0.70976	0.00965675	-0.668449	1.28259e-19
P62264	Rps14	40S ribosomal protein S14	RS14_MOUSE	5.96463	6.02931	5.22626	3.89804	6.06261	6.27824	5.11074	3.5836	NotSig	0.0948153	0.789008	0.821884	NotSig	0.544673	0.710714	0.753788	NotSig	-0.0627795	0.746048	0.767448	NotSig	-0.574247	0.732671	0.782202	-0.949294	0.0505045	0.105075	7.44996	-2.7334	1.26161e-52	-1.6466	1.48306e-21
P62267	Rps23	40S ribosomal protein S23	RS23_MOUSE	6.30558	6.17005	4.60068	4.42475	6.38782	5.71971	5.09034	4.37928	NotSig	0.285651	0.873921	0.896748	NotSig	-0.547422	0.368173	0.454376	NotSig	0.527162	0.199558	0.236584	NotSig	-0.279108	0.927329	0.944746	-1.47417	0.0625776	0.121462	2.10015	-3.30689	0.000322705	-1.99842	0.00353302
P62270	Rps18	40S ribosomal protein S18	RS18_MOUSE	6.48677	6.65678	4.99019	4.06024	7.59813	6.60302	5.24362	4.36771	NotSig	1.07219	0.0392104	0.0702009	NotSig	-0.0730002	0.918906	0.938667	NotSig	0.35281	0.524277	0.5532	NotSig	0.414466	0.834924	0.868927	-2.34466	0.00181809	0.0116415	5.74606	-2.57741	1.03315e-21	-1.0407	0.000407344
P62281	Rps11	40S ribosomal protein S11	RS11_MOUSE	4.60639	2.36203	0	3.91943	6.21231	5.17515	5.20511	5.24814	NotSig	1.34712	0.0459618	0.0808152	NotSig	1.37939	0.134005	0.245491	Enrich	inf	2.56348e-05	0.000569659	NotSig	0.709868	0.161278	0.237234	-1.01399	0.00189675	0.0118301	5.64796	-2.86326	6.73164e-30	-1.58675	5.13746e-15
P62301	Rps13	40S ribosomal protein S13	RS13_MOUSE	6.50198	6.78763	5.23446	4.37854	6.76511	6.5405	4.93198	3.78919	NotSig	0.263285	0.59145	0.642119	NotSig	-0.18689	0.600501	0.649587	NotSig	-0.224789	0.404692	0.435997	NotSig	-0.745124	0.271623	0.371367	-1.87984	0.0068491	0.0266415	2.15873	-1.90349	0.0012337	-0.96325	0.180422
P62305	Snrpe	Small nuclear ribonucleoprotein E	RUXE_MOUSE	0	0	1.14249	0.954875	5.07088	2.72851	3.71764	0	Enrich	inf	0.00357052	0.00927189	NotSig	inf	0.0633481	0.145715	NotSig	1.65094	0.110079	0.139989	NotSig	#NAME?	0.391002	0.49801	-1.28475	0.177021	0.263936	4.59725	-1.66643	0.000529427	-1.96782	1.71643e-18
P62311	Lsm3	U6 snRNA-associated Sm-like protein LSm3	LSM3_MOUSE	0.66807	1.3677	3.48341	0.979437	5.97281	5.06198	5.69109	3.89983	Enrich	5.73287	0.00105585	0.00334129	NotSig	1.70283	0.0696245	0.151911	Enrich	2.09489	0.0183449	0.0305997	NotSig	2.00482	0.0549141	0.0956996	-0.337916	0.646907	0.709685	4.33958	-1.18752	0.0194143	-0.919083	0.0379864
P62320	Snrpd3	Small nuclear ribonucleoprotein Sm D3	SMD3_MOUSE	3.39177	4.02456	3.77857	3.61143	4.61589	4.8487	4.05435	1.38208	NotSig	0.489208	0.374353	0.443422	NotSig	0.954572	0.153485	0.272543	NotSig	-0.943228	0.850892	0.863228	NotSig	-2.57151	0.318767	0.425275	-0.67058	0.12668	0.201103	6.13304	-1.09474	0.00206955	-1.63636	4.22362e-19
P62331	Arf6	ADP-ribosylation factor 6	ARF6_MOUSE	0.972186	0	0	2.02562	7.51322	6.48295	7.11335	6.44349	Enrich	5.77888	0.00516838	0.0126902	Enrich	inf	0.000166463	0.00311541	Enrich	inf	8.21343e-05	0.000570565	NotSig	3.40262	0.0311878	0.0682249	-0.406075	0.273869	0.364739	5.21631	-1.03843	0.746437	-0.447759	0.351697
P62334	Psmc6	26S proteasome regulatory subunit 10B	PRS10_MOUSE	0	1.0794	1.71491	2.5399	6.60411	5.48838	5.29586	5.30876	Enrich	inf	4.38037e-05	0.000346359	NotSig	4.72477	0.0296354	0.0928022	NotSig	0.421759	0.127833	0.160085	NotSig	0.423913	0.18499	0.267081	-1.35593	0.00180037	0.0116301	5.57036	-1.16048	0.00113043	-0.976799	0.00176867
P62342	Selenot	Thioredoxin reductase-like selenoprotein T	SELT_MOUSE	0	0	0	6.6057	0	0	1.99721	6.4757	NotSig				NotSig				NotSig	inf	0.181923	0.219209	NotSig	-0.172512	0.601945	0.673058	inf	0.181923	0.269392
P62482	Kcnab2	Voltage-gated potassium channel subunit beta-2	KCAB2_MOUSE	4.20912	4.14811	2.39717	4.00736	8.73218	7.00037	8.66482	7.52186	Enrich	4.57337	1.34739e-05	0.000196622	Enrich	2.96339	0.000456455	0.00463861	Enrich	5.95494	0.00394848	0.00846507	Enrich	3.55046	0.0010166	0.0140778	-0.0705234	0.815248	0.853375	7.78303	1.73238	1.36215e-34	2.88664	1.83754e-79
P62484	Abi2	Abl interactor 2	ABI2_MOUSE	0	0	0	0.728542	6.20646	5.2494	8.17493	6.75133	Enrich	inf	3.405e-05	0.00030012	Enrich	inf	0.000238466	0.00342609	Enrich	inf	4.81398e-05	0.000569659	Enrich	6.04289	0.00255248	0.0193659	2.00752	0.000675038	0.00707812	7.52203	0.677553	2.71248e-11	-0.394726	0.00218178
P62500;P62500-3	Tsc22d1	TSC22 domain family protein 1;Isoform 3 of TSC22 domain family protein 1	T22D1_MOUSE	0	1.40631	1.21473	0	6.00276	5.66184	6.81123	5.6327	Enrich	inf	7.23272e-05	0.000443973	NotSig	2.12697	0.0536247	0.145715	Enrich	4.05882	0.0167581	0.0285166	Enrich	inf	0.0125854	0.0451172	0.851207	0.054659	0.111084	7.59353	-1.01484	0.291491	-0.794844	0.000232048
P62631	Eef1a2	Elongation factor 1-alpha 2	EF1A2_MOUSE	5.40861	5.80564	5.00571	4.8975	8.52436	7.17638	7.74363	7.21876	Enrich	3.04553	0.00166406	0.00486034	NotSig	1.42321	0.0161679	0.0585921	Enrich	2.70608	0.000978297	0.0025097	Enrich	2.21524	0.00722789	0.0331258	-0.766259	0.00744652	0.0282984	9.32275	1.83107	1.56347e-89	1.65947	1.34283e-98
P62702	Rps4x	40S ribosomal protein S4, X isoform	RS4X_MOUSE	6.0037	6.30682	5.36847	5.45115	6.78776	6.41059	5.29584	5.02242	NotSig	0.726302	0.0692475	0.106386	NotSig	0.0663209	0.707288	0.750453	NotSig	-0.300907	0.91817	0.924941	NotSig	-0.492094	0.368548	0.481192	-1.45761	0.00747165	0.0283219	3.17165	-3.99896	3.75943e-19	-2.06901	2.7611e-05
P62715	Ppp2cb	Serine/threonine-protein phosphatase 2A catalytic subunit beta isoform	PP2AB_MOUSE	0.540476	0	0	0	5.87386	5.25655	6.9269	6.10874	Enrich	6.07231	0.00139723	0.00420854	Enrich	inf	0.000535278	0.00496111	Enrich	inf	9.58473e-05	0.000590983	NotSig	inf	0.0334926	0.0705756	1.10157	0.0144511	0.0437464	7.20632	0.877087	1.66443e-11	0.493616	2.18696e-05
P62717	Rpl18a	60S ribosomal protein L18a	RL18A_MOUSE	5.16339	5.31116	3.3769	3.42759	5.65707	5.28332	4.44166	4.1132	NotSig	0.43354	0.283467	0.357093	NotSig	-0.0586305	0.952304	0.964267	NotSig	0.32315	0.420136	0.451958	NotSig	-0.120935	0.598588	0.671441	-1.28781	0.0058798	0.0242395	4.1346	-2.9208	3.68265e-15	-0.256904	0.817473
P62743	Ap2s1	AP-2 complex subunit sigma	AP2S1_MOUSE	5.15619	6.603	3.81471	7.50022	7.27838	7.28286	9.93557	9.38851	NotSig	0.333222	0.327772	0.404929	NotSig	0.376426	0.437559	0.497459	NotSig	4.07123	0.0346627	0.0523132	NotSig	1.55025	0.050039	0.0897636	3.0291	0.0140113	0.0428253	8.63058	0.662336	2.90638e-20	1.37718	2.39831e-54
P62746	Rhob	Rho-related GTP-binding protein RhoB	RHOB_MOUSE	3.40504	4.55222	3.25888	4.68707	8.14808	6.8317	9.39745	8.2436	Enrich	4.05022	0.0253452	0.0483352	Enrich	2.37373	0.000741999	0.0059322	Enrich	5.53241	0.00995976	0.0184709	Enrich	3.54358	0.000494482	0.0121929	1.28622	0.00535455	0.0229102	6.13024	-2.70547	2.51408e-45	-1.09679	1.12665e-10
P62748	Hpcal1	Hippocalcin-like protein 1	HPCL1_MOUSE	0.871507	1.98893	1.95374	0	7.42724	6.21674	6.08895	5.28116	Enrich	6.1958	0.00237101	0.00655305	NotSig	2.85503	0.0407384	0.11889	NotSig	3.30152	0.0330308	0.0504162	NotSig	inf	0.0522614	0.0921624	-1.43744	0.0215293	0.058013	5.38122	0.521883	0.0246747	0.793899	0.000366013
P62751	Rpl23a	60S ribosomal protein L23a	RL23A_MOUSE	4.38819	2.79221	1.28492	0	5.58691	5.32972	2.48581	0	NotSig	0.292825	0.483072	0.537181	NotSig	0.905264	0.227264	0.327831	NotSig	0.863303	0.557133	0.584857					-1.76237	0.117416	0.189095	1.10175	-0.878605	0.646818	-1.23677	0.390612
P62754	Rps6	40S ribosomal protein S6	RS6_MOUSE	6.38782	6.61336	5.86627	5.32935	6.93953	6.58109	5.09915	4.93661	NotSig	0.401916	0.292117	0.366981	NotSig	-0.032446	0.958695	0.969455	NotSig	-0.820181	0.107855	0.137772	NotSig	-0.572558	0.644614	0.710592	-1.8238	0.00181509	0.0116415	0.963723	-1.62527	0.509261	-0.040956	0.764209
P62761	Vsnl1	Visinin-like protein 1	VISL1_MOUSE	5.8102	6.08347	4.65545	4.44434	10.8051	9.42445	10.396	9.533	Enrich	4.92649	9.23214e-05	0.000515848	Enrich	3.34287	4.44298e-05	0.00270019	Enrich	5.78437	6.82114e-06	0.000538381	Enrich	5.15147	0.00806844	0.0348393	-0.389133	0.281189	0.372772	9.58316	2.52085	9.53739e-130	3.82303	8.09227e-234
P62774	Mtpn	Myotrophin	MTPN_MOUSE	2.85231	2.84698	3.17294	4.07986	5.18482	5.34162	6.68723	6.21079	NotSig	1.53833	0.118632	0.171254	NotSig	1.869	0.0899821	0.181328	NotSig	2.93844	0.0443442	0.064679	Enrich	2.11774	0.00268904	0.0198396	1.52991	0.000241766	0.00441347	7.54594	0.165369	3.49043e-08	-1.0673	2.89476e-23
P62806	H4c1	Histone H4	H4_MOUSE	9.2102	9.37515	9.06841	11.1966	9.34045	10.2676	8.7218	10.3271	NotSig	-0.00799587	0.872334	0.895453	NotSig	0.969065	0.265581	0.372649	NotSig	-0.374032	0.398268	0.429722	NotSig	-0.900067	0.0624785	0.106441	-0.750616	0.252479	0.342523
P62812	Gabra1	Gamma-aminobutyric acid receptor subunit alpha-1	GBRA1_MOUSE	0	0	0	4.3439	8.67911	4.56691	4.75848	5.3177	Enrich	inf	0.000105409	0.000554276	NotSig	inf	0.0167935	0.060203	Enrich	inf	0.000332197	0.0010508	NotSig	0.880552	0.107169	0.165796	-4.00384	9.09494e-05	0.00285513	7.41458	-0.691476	0.536471	-0.079824	0.00354818
P62814	Atp6v1b2	V-type proton ATPase subunit B, brain isoform	VATB2_MOUSE	4.92443	5.39429	5.12471	5.6758	7.79373	7.1608	9.92744	9.4553	Enrich	2.83042	0.00121341	0.00375774	Enrich	1.78101	0.00483909	0.0225992	Enrich	4.80009	1.85499e-05	0.000569659	Enrich	3.76585	8.87735e-05	0.0113696	2.17553	0.000743604	0.00744904	8.88531	1.81794	8.58613e-67	1.01184	1.56455e-42
P62821	Rab1A	Ras-related protein Rab-1A	RAB1A_MOUSE	3.33917	4.21961	3.4531	4.76987	8.17395	6.50355	8.98668	8.65449	NotSig	3.86959	0.0270356	0.0510982	Enrich	2.34115	0.00211269	0.0117815	Enrich	4.66031	0.0193897	0.0319406	Enrich	3.93486	0.0131427	0.0457861	0.782319	0.0173487	0.0499076
P62823	Rab3c	Ras-related protein Rab-3C	RAB3C_MOUSE	4.44934	4.32083	4.73269	5.72864	6.09144	6.04287	9.64076	9.4462	Enrich	1.67322	0.000275448	0.0011222	Enrich	1.80977	0.0018466	0.0107483	Enrich	4.89497	5.39109e-05	0.000569659	Enrich	3.72588	0.00178276	0.0161656	3.58859	3.95051e-05	0.00241353	11.4143	3.37726	1.14274e-282	2.94568	9.63306e-283
P62827	Ran	GTP-binding nuclear protein Ran	RAN_MOUSE	5.33461	5.30447	5.2637	5.22628	7.8174	7.2155	9.21525	8.5208	Enrich	2.1315	0.0254514	0.0484704	Enrich	1.92473	0.000196607	0.00316145	Enrich	3.99741	4.01434e-06	0.000452653	Enrich	3.24236	0.00151757	0.0154632	1.40323	0.00128162	0.00973494	6.09085	-0.499611	0.842206	-0.752788	0.000497599
P62830	Rpl23	60S ribosomal protein L23	RL23_MOUSE	6.07641	6.26069	4.85239	4.14694	5.71932	6.30933	5.03729	4.0851	NotSig	-0.430532	0.404131	0.456598	NotSig	0.157267	0.920868	0.94026	NotSig	0.259969	0.57675	0.604786	NotSig	-0.382861	0.913247	0.933844	-0.660619	0.102307	0.17065	5.98976	-2.25866	4.29064e-18	-1.10607	0.000184137
P62835	Rap1a	Ras-related protein Rap-1A	RAP1A_MOUSE	3.27852	3.30514	2.0905	4.95892	7.10067	6.48587	7.79689	7.44767	NotSig	3.18175	0.0393111	0.0703354	NotSig	2.49636	0.0651372	0.146798	Enrich	4.4735	0.0190997	0.03164	Enrich	2.52445	0.00646713	0.0307321	0.689972	0.0233177	0.0606847	5.41615	-3.08218	9.98581e-35	-1.16301	0.0529703
P62849;P62849-2;P62849-3	Rps24	40S ribosomal protein S24;Isoform 2 of 40S ribosomal protein S24;Isoform 3 of 40S ribosomal protein S24	RS24_MOUSE	6.38167	6.48809	5.2336	4.79638	6.8593	5.9899	4.68577	3.98288	NotSig	0.400922	0.32732	0.404553	NotSig	-0.475319	0.322097	0.438923	NotSig	-0.584714	0.065331	0.0892122	NotSig	-0.997872	0.197692	0.282661	-2.26096	0.000613166	0.00677291	7.74256	-2.43743	2.65233e-33	-0.725502	0.6424
P62852	Rps25	40S ribosomal protein S25	RS25_MOUSE	6.34056	6.54249	5.05321	4.08413	7.13044	6.88292	5.72937	3.56633	NotSig	0.790685	0.103938	0.152199	NotSig	0.39862	0.346287	0.454376	NotSig	0.72479	0.346329	0.391497	NotSig	-0.805239	0.476058	0.580066	-1.25532	0.0535655	0.109519	5.14691	-2.55057	8.48125e-17	-0.942516	0.0444918
P62855	Rps26	40S ribosomal protein S26	RS26_MOUSE	6.68815	7.20177	6.07684	5.20981	6.55052	6.36758	5.62724	5.23033	NotSig	-0.224358	0.719053	0.759952	NotSig	-0.888673	0.0473919	0.132977	NotSig	-0.467486	0.0993719	0.128192	NotSig	-0.0291133	0.964548	0.972854	-0.937523	0.00415256	0.0196686	7.69449	-1.98283	4.90578e-22	-0.296213	0.0158339
P62862	Fau	40S ribosomal protein S30	RS30_MOUSE	5.74803	5.63332	1.37047	0	5.37711	5.72022	3.82354	0	NotSig	-0.11682	0.652154	0.698373	NotSig	0.111395	0.759837	0.796362	NotSig	0.535787	0.17227	0.209159					-1.7796	0.116951	0.188871	2.99846	-2.13253	0.0621564	-0.091132	0.821183
P62874	Gnb1	Guanine nucleotide-binding protein G(I)/G(S)/G(T) subunit beta-1	GBB1_MOUSE	1.59977	5.88337	3.11387	6.59452	7.63654	6.67922	8.02401	8.42845	NotSig	3.25064	0.0325032	0.0597086	NotSig	0.772567	0.191721	0.29009	NotSig	2.84704	0.0710814	0.095833	Enrich	1.78084	0.00369235	0.0226126	0.42397	0.128542	0.203502	8.9271	0.579483	7.14089e-25	0.720993	1.00021e-29
P62878	Rbx1	E3 ubiquitin-protein ligase RBX1	RBX1_MOUSE	0	0.944953	2.18781	1.59255	5.64103	4.70351	6.76983	5.38464	Enrich	inf	0.000258793	0.00107047	NotSig	2.99534	0.0271507	0.0878526	NotSig	3.41216	0.0364138	0.0547257	NotSig	3.32813	0.0253847	0.0608325	1.06847	0.0227038	0.0594195	6.81722	-1.37464	5.4225e-08	-1.12761	1.70456e-12
P62880	Gnb2	Guanine nucleotide-binding protein G(I)/G(S)/G(T) subunit beta-2	GBB2_MOUSE	6.59901	6.9212	6.99505	8.31393	9.47874	8.38867	9.81941	10.2036	Enrich	2.79159	0.00268647	0.00730742	NotSig	1.48801	0.022386	0.0760496	Enrich	2.76292	0.000896423	0.00232333	Enrich	1.82624	0.00314667	0.0210083	0.389138	0.232581	0.321266	8.77582	0.322614	2.05077e-10	-0.596627	3.42703e-10
P62881-2	Gnb5	Isoform 2 of Guanine nucleotide-binding protein subunit beta-5	GNB5_MOUSE	0	0.940375	0.844715	3.56718	5.4356	4.36658	6.70926	6.94471	Enrich	inf	4.30667e-08	4.60564e-05	NotSig	2.83951	0.027305	0.0881448	Enrich	5.51564	0.00427269	0.00904675	Enrich	3.47461	0.0103454	0.0409013	1.34659	0.0122872	0.0393824	1.2889	-0.237765	0.775394	-3.11563	1.55489e-07
P62889	Rpl30	60S ribosomal protein L30	RL30_MOUSE	0	0	0	0	5.19954	0	4.27735	4.96844	Enrich	inf	0.00601815	0.0144794	NotSig				NotSig	inf	0.18251	0.219611	NotSig	inf	0.5	0.580066	1.80301	0.741556	0.791059	3.955	-3.43607	1.05219e-17	-1.41199	0.0132109
P62897	Cycs	Cytochrome c, somatic	CYC_MOUSE	8.62736	9.04749	8.32505	9.96478	9.74123	8.93665	9.03297	10.1434	NotSig	0.953011	0.0915561	0.135584	NotSig	0.124261	0.87438	0.899749	NotSig	0.807625	0.132	0.164277	NotSig	0.122996	0.561157	0.635284	-0.647875	0.151338	0.23212	4.99618	-0.903161	0.459601	-0.67872	0.00327204
P62900	Rpl31	60S ribosomal protein L31	RL31_MOUSE	6.15635	6.37908	4.80147	4.28599	6.34845	6.23176	4.48571	3.66783	NotSig	0.143676	0.687471	0.73277	NotSig	-0.0930251	0.756127	0.793412	NotSig	-0.324556	0.480229	0.511045	NotSig	-0.873552	0.375564	0.488009	-1.90164	0.00356844	0.0178224	5.11411	-1.94581	1.43634e-07	-0.592219	0.112837
P62908	Rps3	40S ribosomal protein S3	RS3_MOUSE	5.46882	5.49749	4.88103	4.53529	7.6827	6.04171	6.67081	4.64317	Enrich	2.06468	0.0207832	0.040766	NotSig	0.513422	0.141406	0.256401	NotSig	2.10294	0.0366549	0.0550592	NotSig	-0.640647	0.920508	0.93956	-0.7689	0.166657	0.251332	7.63046	-2.75082	4.50324e-51	-1.18362	1.33486e-12
P62911	Rpl32	60S ribosomal protein L32	RL32_MOUSE	6.45375	6.70503	6.84477	5.70965	6.28497	7.62871	6.67716	5.88605	NotSig	-0.268878	0.729767	0.770388	NotSig	0.842369	0.0733952	0.156812	NotSig	-0.201449	0.685254	0.709745	NotSig	0.0799578	0.600279	0.672533	0.397579	0.28932	0.380813	7.69082	-1.54724	5.25562e-13	-0.69672	0.0660215
P62918	Rpl8	60S ribosomal protein L8	RL8_MOUSE	6.58072	6.67299	5.39988	5.78986	6.90297	5.98308	5.57477	5.06664	NotSig	0.337277	0.365492	0.443422	NotSig	-0.735933	0.24564	0.349975	NotSig	0.477044	0.820494	0.836233	NotSig	-0.965602	0.219893	0.309059	-0.994417	0.133574	0.210427	8.01898	-1.59685	1.11997e-19	-0.829395	2.02691e-05
P62962	Pfn1	Profilin-1	PROF1_MOUSE	1.5131	4.80074	3.9582	5.42149	8.02238	7.52346	9.94756	8.80619	Enrich	4.00066	0.0227459	0.0440811	Enrich	2.53591	0.0108331	0.0420058	Enrich	4.84421	0.0233884	0.0373599	Enrich	3.31103	0.000852315	0.0133755	1.92572	1.88154e-05	0.00217623	7.32217	-1.74474	2.53903e-19	-1.43232	6.81956e-22
P62996;P62996-2	Tra2b	Transformer-2 protein homolog beta;Isoform 2 of Transformer-2 protein homolog beta	TRA2B_MOUSE	0	0	0.779969	0	0	0	0	0	NotSig				NotSig				NotSig	#NAME?	0.391002	0.422677								6.02255	-0.43628	0.973358	0.071965	0.315046
P63001	Rac1	Ras-related C3 botulinum toxin substrate 1	RAC1_MOUSE	2.63231	2.86136	2.35134	5.94909	7.13688	6.64567	8.62131	7.79938	NotSig	2.63963	0.0632369	0.0992022	NotSig	1.94552	0.105669	0.203565	Enrich	4.8199	0.0198196	0.0325487	Enrich	1.85656	0.0038607	0.0232885	1.49994	0.000112615	0.00310375	7.00056	-1.33204	1.21904e-08	-0.959996	1.67477e-08
P63005	Pafah1b1	Platelet-activating factor acetylhydrolase IB subunit alpha	LIS1_MOUSE	4.32032	4.24875	4.75535	4.90334	6.93367	6.17957	7.69684	7.4525	Enrich	2.61059	0.000891303	0.00289726	Enrich	2.03376	0.00325592	0.0162796	Enrich	2.97731	9.59392e-05	0.000590983	Enrich	2.50347	0.00542899	0.0282609	0.804094	0.0325224	0.076396	8.64646	-0.021093	0.000171716	-0.235907	0.961714
P63011	Rab3a	Ras-related protein Rab-3A	RAB3A_MOUSE	5.7783	6.1484	5.72173	7.45895	8.77447	8.45999	11.2684	10.6613	Enrich	2.93023	0.00150546	0.00446604	Enrich	2.27459	0.00145911	0.00915386	Enrich	5.38032	0.000535484	0.0015136	Enrich	3.18147	0.000167035	0.0113696	2.51542	7.82301e-05	0.00273122	9.30178	1.59586	2.61328e-71	0.543308	2.33638e-24
P63017	Hspa8	Heat shock cognate 71 kDa protein	HSP7C_MOUSE	6.65197	6.75552	6.33648	6.84022	10.4167	8.97397	10.7847	10.1795	Enrich	3.68829	0.00075816	0.00255195	Enrich	2.31842	0.00412858	0.0197223	Enrich	4.48902	8.23582e-06	0.000569659	Enrich	3.2227	0.00123778	0.0149831	0.400721	0.190859	0.277841	9.96363	0.10284	4.17423e-06	0.44101	1.1868e-20
P63028	Tpt1	Translationally-controlled tumor protein	TCTP_MOUSE	0	1.25829	0.777472	0	6.73372	6.16615	7.87733	6.68768	Enrich	inf	0.000147301	0.000703262	NotSig	3.20813	0.0281243	0.0900248	Enrich	6.99087	0.00159476	0.00380964	NotSig	inf	0.0220265	0.057224	1.12593	0.0200815	0.055404	3.10872	-4.42295	1.89579e-16	-0.613153	0.827645
P63030	Mpc1	Mitochondrial pyruvate carrier 1	MPC1_MOUSE	5.60612	5.05747	4.33688	5.44538	7.94313	5.39806	6.84889	6.18008	Enrich	2.43856	0.0016062	0.00471404	NotSig	0.469042	0.521046	0.573431	NotSig	0.927853	0.210586	0.247612	NotSig	0.538987	0.174685	0.254689	-1.15956	0.0365706	0.0828781	5.04987	-1.53288	1.2716e-07	-0.622282	0.0665638
P63037	Dnaja1	DnaJ homolog subfamily A member 1	DNJA1_MOUSE	0.596044	0	1.32599	3.14636	7.37705	5.94472	6.86564	5.94508	Enrich	7.29889	0.0012381	0.00381636	Enrich	inf	0.00016213	0.00311541	Enrich	3.60993	0.024122	0.0384052	NotSig	2.04054	0.0841262	0.135285	-0.499391	0.0377268	0.0847209	7.42303	-0.381762	0.08987	-0.612621	0.00030541
P63038	Hspd1	60 kDa heat shock protein, mitochondrial	CH60_MOUSE	5.48084	5.71385	5.35544	6.82469	5.81622	6.06115	5.85793	7.225	NotSig	0.17337	0.544015	0.596209	NotSig	0.324994	0.322329	0.439015	Enrich	0.502917	0.0207612	0.0338623	NotSig	0.351059	0.18629	0.268131	0.0253528	0.819985	0.857025	7.21069	-0.127624	0.026622	-0.118042	0.933087
P63040	Cplx1	Complexin-1	CPLX1_MOUSE	0.829103	1.02414	0	2.81724	7.91726	7.50988	10.0232	8.95735	Enrich	6.83604	0.00165891	0.00485837	Enrich	5.55878	0.00616023	0.0269067	Enrich	inf	2.14785e-05	0.000569659	Enrich	5.70867	0.00737008	0.0333612	2.06786	0.00174561	0.0114036	11.3327	3.71854	4.71058e-251	3.92686	1.20539e-274
P63044	Vamp2	Vesicle-associated membrane protein 2	VAMP2_MOUSE	2.5311	2.80752	4.17553	6.4672	6.58596	6.41328	9.5306	9.14514	NotSig	2.27657	0.07396	0.11237	NotSig	1.86784	0.111448	0.212814	Enrich	4.27838	0.0321955	0.0492897	Enrich	2.67766	4.51157e-05	0.0113696	2.93005	0.000141143	0.00352128	8.80001	1.79282	2.88397e-60	0.957614	5.97119e-34
P63046	Sult4a1	Sulfotransferase 4A1	ST4A1_MOUSE	0	0	0	0	6.65116	4.8909	6.51366	6.45796	Enrich	inf	5.42392e-07	9.5355e-05	Enrich	inf	0.000788977	0.00608313	Enrich	inf	7.71901e-05	0.000569659	NotSig	inf	0.020037	0.054472	-0.0973609	0.569017	0.638106	8.23316	2.34631	8.60464e-56	1.11302	1.35819e-27
P63073	Eif4e	Eukaryotic translation initiation factor 4E	IF4E_MOUSE	1.01213	0	0.983773	1.69102	4.79514	3.47168	5.03002	4.73009	NotSig	2.80255	0.0322457	0.0593646	Enrich	inf	0.00159777	0.00965926	Enrich	3.18882	0.0236128	0.0376571	Enrich	3.13125	0.0119617	0.0438388	0.265232	0.371347	0.462756	5.29657	-0.249447	0.729633	-0.508476	0.00298656
P63080	Gabrb3	Gamma-aminobutyric acid receptor subunit beta-3	GBRB3_MOUSE	0	0	0	3.61354	6.56824	2.44676	5.35908	5.02546	Enrich	inf	0.000195277	0.000844911	NotSig	inf	0.187205	0.288676	Enrich	inf	8.77201e-05	0.000580051	NotSig	0.32183	0.355055	0.466165	-1.29097	0.0172041	0.0496129	6.67567	1.31296	9.55181e-11	-1.17571	2.56195e-19
P63082	Atp6v0c	V-type proton ATPase 16 kDa proteolipid subunit	VATL_MOUSE	1.66505	2.01738	1.79662	6.54652	3.22221	6.50858	6.87498	7.38277	NotSig	0.933089	0.55837	0.610058	NotSig	0.481632	0.111673	0.213092	NotSig	1.9382	0.0622748	0.0857736	NotSig	0.695888	0.439067	0.548297	1.53581	0.145708	0.225497	0.176027	-1.4962	0.646818	1.09615	1
P63085	Mapk1	Mitogen-activated protein kinase 1	MK01_MOUSE	1.94827	3.93864	3.02845	4.77581	8.34345	7.37665	9.22396	8.1874	Enrich	5.55252	0.0102911	0.022588	Enrich	3.44156	0.000603498	0.00521203	Enrich	5.54943	0.00865285	0.0164783	Enrich	3.44403	0.00725993	0.0331832	0.918178	0.0250585	0.0636133	7.42875	0.611847	5.03861e-09	-1.33744	5.36745e-35
P63087;P63087-2	Ppp1cc	Serine/threonine-protein phosphatase PP1-gamma catalytic subunit;Isoform 2 of Serine/threonine-protein phosphatase PP1-gamma catalytic subunit	PP1G_MOUSE	0	0	1.03464	4.32875	6.8204	5.11671	6.61264	5.9254	Enrich	inf	2.00909e-06	0.000127864	Enrich	inf	0.000260397	0.00351264	Enrich	4.57169	0.0113852	0.0205693	NotSig	1.52797	0.0205938	0.0550802	-0.186277	0.311111	0.402483	3.12269	-0.254498	0.587077	-0.209255	0.389649
P63094;P63094-3;Q6R0H7	Gnas	Guanine nucleotide-binding protein G(s) subunit alpha isoforms short;Isoform Gnas-3 of Guanine nucleotide-binding protein G(s) subunit alpha isoforms short;Guanine nucleotide-binding protein G(s) subunit alpha isoforms XLas	GNAS2_MOUSE;GNAS2_MOUSE;GNAS1_MOUSE	1.94845	0	2.27003	4.45198	8.22106	6.2167	6.8992	6.44876	Enrich	5.41514	0.0109332	0.0237867	Enrich	inf	0.000788752	0.00608313	NotSig	3.44102	0.0373006	0.0558828	Enrich	2.01282	0.00283901	0.0203583	-1.31578	0.00131624	0.00989819	11.1274	0.089269	2.84003e-08	1.29762	3.27588e-158
P63101	Ywhaz	14-3-3 protein zeta/delta	1433Z_MOUSE	7.37487	7.36644	7.4319	7.68984	10.9267	9.53913	11.2284	10.8058	Enrich	3.46622	0.000865696	0.0028375	Enrich	2.23539	0.00225326	0.012435	Enrich	3.80102	6.21225e-05	0.000569659	Enrich	3.11521	0.0156066	0.0494592	0.356359	0.372061	0.463315	8.99782	0.475943	1.43377e-17	-1.01294	4.22766e-45
P63137-2	Gabrb2	Isoform 2 of Gamma-aminobutyric acid receptor subunit beta-2	GBRB2_MOUSE	1.23262	3.65341	0	4.78665	7.24429	5.19114	4.76107	5.05632	Enrich	4.53121	0.012498	0.0264584	NotSig	0.665379	0.30884	0.424555	Enrich	inf	0.000115278	0.000599543	NotSig	0.21832	0.639813	0.706407	-2.67385	0.00360991	0.0178278	3.57278	-0.730337	0.463139	-1.4459	7.27217e-08
P63141	Kcna2	Potassium voltage-gated channel subfamily A member 2	KCNA2_MOUSE	5.0573	4.97373	5.01619	5.99519	7.28305	6.49468	8.69531	8.18696	Enrich	2.09809	0.00950917	0.0212431	Enrich	1.5507	0.00699891	0.0297874	Enrich	3.64083	0.000167697	0.000678542	Enrich	2.16843	0.00133883	0.0151013	1.42498	0.00158821	0.0106642	8.65665	0.516765	2.03162e-23	1.83087	6.47579e-64
P63158	Hmgb1	High mobility group protein B1	HMGB1_MOUSE	0	1.40414	1.15221	0	2.58987	4.85615	1.85577	0	NotSig	inf	0.0583617	0.0966099	NotSig	1.43666	0.0863142	0.175935	NotSig	-0.735932	0.617449	0.644637					-1.09859	0.522792	0.593822	4.15368	-3.44324	6.0381e-33	-2.52559	5.06703e-19
P63168	Dynll1	Dynein light chain 1, cytoplasmic	DYL1_MOUSE	4.90805	5.21786	5.49439	5.73402	7.77116	6.76923	8.58685	7.78698	Enrich	2.83904	0.000397328	0.00150711	Enrich	1.53322	0.00291554	0.0149141	Enrich	3.06996	0.00054875	0.00154047	Enrich	2.03758	0.000720435	0.0131974	0.79374	0.0105217	0.035819	6.51555	-1.91939	1.07582e-13	-2.30811	1.96791e-76
P63213	Gng2	Guanine nucleotide-binding protein G(I)/G(S)/G(O) subunit gamma-2	GBG2_MOUSE	2.96702	1.73323	1.26398	5.87518	4.34949	2.92134	5.71502	5.6533	NotSig	0.469027	0.564625	0.616403	NotSig	0.109419	0.643615	0.690329	NotSig	2.70014	0.0378402	0.0564846	NotSig	-0.269421	0.510725	0.589819	0.263185	0.422713	0.4981	7.56891	1.4683	1.8032e-30	2.38031	4.24484e-80
P63216	Gng3	Guanine nucleotide-binding protein G(I)/G(S)/G(O) subunit gamma-3	GBG3_MOUSE	1.06043	1.09632	1.65972	4.65713	7.41587	5.95396	7.22787	7.16571	Enrich	5.25706	0.00889483	0.0201988	NotSig	3.70741	0.0177882	0.0631732	Enrich	5.03829	0.00992019	0.0184333	Enrich	2.53516	0.00261369	0.0195922	-0.193792	0.235604	0.323974
P63242	Eif5a	Eukaryotic translation initiation factor 5A-1	IF5A1_MOUSE	4.11016	4.41424	4.31603	3.61559	6.98936	6.33242	7.15499	6.14595	Enrich	2.62503	0.0121305	0.0258719	Enrich	1.90583	0.00576935	0.0257491	Enrich	2.94862	0.000436688	0.0012863	Enrich	2.44886	0.006331	0.0305781	0.21713	0.595024	0.662562	6.89584	-0.306056	0.829663	-0.286185	0.968338
P63254	Crip1	Cysteine-rich protein 1	CRIP1_MOUSE	0	0	0.414362	0	0	1.85506	0.274314	0.0221751	NotSig				NotSig	inf	0.183432	0.288495	NotSig	-0.919037	0.788941	0.806079	NotSig	inf	0.5	0.580066	inf	0.391002	0.469332	4.17788	-4.11028	2.68e-15	-3.98429	0.000134889
P63260	Actg1	Actin, cytoplasmic 2	ACTG_MOUSE	9.10433	9.30182	9.37919	9.5072	12.4015	11.4567	13.2394	12.3625	Enrich	3.18545	0.00223914	0.00624507	Enrich	2.13914	0.000752188	0.00595133	Enrich	3.86704	2.46099e-06	0.000366048	Enrich	2.74764	0.00173393	0.0159661	0.86116	0.0104167	0.0356336	1.95857	-1.65943	0.07882	1.07917	0.342031
P63276	Rps17	40S ribosomal protein S17	RS17_MOUSE	1.1663	0.903022	0	0	5.75437	2.45473	4.93699	5.62344	Enrich	3.2317	0.0253338	0.0483352	NotSig	2.37213	0.397483	0.459897	Enrich	inf	5.07261e-05	0.000569659	NotSig	inf	0.0476035	0.0872887	-0.929277	0.0710498	0.132486	2.5659	-2.65454	0.000127768	-0.766853	0.0421026
P63300	Selenow	Selenoprotein W	SELW_MOUSE	0	0	0	0.640786	0	0	3.19643	3.43647	NotSig				NotSig				Enrich	inf	6.68292e-05	0.000569659	NotSig	3.01012	0.0194777	0.0541027	inf	6.68292e-05	0.00251174
P63318	Prkcg	Protein kinase C gamma type	KPCG_MOUSE	5.85243	5.80169	5.42789	6.72393	5.83307	6.62448	6.94322	6.25519	NotSig	-1.41503	0.986915	0.989855	NotSig	-0.340124	0.521832	0.574058	NotSig	-1.50546	0.540999	0.56917	NotSig	-0.518485	0.446397	0.55523	1.08174	0.0115443	0.0377507	4.85447	1.75982	5.87761e-06	-0.585958	0.000213962
P63321	Rala	Ras-related protein Ral-A	RALA_MOUSE	1.63496	1.40853	1.10089	2.63361	7.22626	5.77714	8.02551	6.94858	Enrich	5.18066	0.00701171	0.0163686	Enrich	4.06179	0.0100099	0.0394465	Enrich	5.72253	0.00709308	0.0139288	Enrich	3.86301	0.0148654	0.0485328	0.763436	0.0582307	0.115756	6.83826	-0.690359	0.630896	-0.09886	0.296796
P63323	Rps12	40S ribosomal protein S12	RS12_MOUSE	1.62321	1.65781	3.00721	3.69937	5.98951	5.59791	4.35562	3.3959	NotSig	1.69002	0.07056	0.10804	NotSig	0.975163	0.0973607	0.191449	NotSig	0.777091	0.281009	0.322873	NotSig	-0.902345	0.686324	0.744312	-1.83036	0.0200825	0.055404	1.36824	-3.87199	0.000671507	1.36387	0.390612
P63325	Rps10	40S ribosomal protein S10	RS10_MOUSE	4.1373	6.19831	3.83798	5.74283	8.08822	6.59009	4.53919	5.10053	NotSig	3.11881	0.062271	0.0984235	NotSig	0.308299	0.482917	0.538373	NotSig	-0.200005	0.639224	0.666642	NotSig	-0.685737	0.159076	0.234361	-3.7222	0.00103286	0.00867443	6.73223	-2.49875	1.67986e-29	-0.799509	0.0573279
P63328	Ppp3ca	Serine/threonine-protein phosphatase 2B catalytic subunit alpha isoform	PP2BA_MOUSE	6.83733	7.17351	7.55935	8.08767	9.42592	8.15501	9.94523	9.51704	Enrich	2.54598	0.000770252	0.00258002	NotSig	1.02126	0.0664552	0.147678	Enrich	2.36642	0.000451873	0.00132559	Enrich	1.40328	0.0052107	0.0275963	0.556222	0.0892894	0.154825	10.2254	0.5543	1.76313e-41	-2.45557	1.84733e-148
P63330	Ppp2ca	Serine/threonine-protein phosphatase 2A catalytic subunit alpha isoform	PP2AA_MOUSE	1.98647	3.56864	3.78195	4.29593	8.18422	7.29514	9.30706	8.14587	Enrich	5.15855	0.0130413	0.0274187	NotSig	2.8376	0.0574343	0.145715	Enrich	4.73586	0.0211602	0.0344348	Enrich	3.75863	0.00106998	0.014224	1.14193	0.00216436	0.0129682	7.72801	-0.151178	0.527602	-0.509185	7.11017e-05
P67778	Phb	Prohibitin	PHB_MOUSE	2.95543	2.20878	2.5394	5.49132	6.13972	5.10904	5.60123	6.69831	Enrich	2.78634	0.0153578	0.0315885	NotSig	1.71022	0.110273	0.211627	NotSig	1.51741	0.133861	0.166398	NotSig	1.26647	0.18588	0.267816	-0.388045	0.370206	0.462598	6.30978	0.527559	0.00089373	1.23692	1.49669e-12
P67871	Csnk2b	Casein kinase II subunit beta	CSK2B_MOUSE	0	0	0	0	6.34611	4.46199	6.71482	5.94618	Enrich	inf	8.55873e-05	0.000491368	Enrich	inf	0.00285656	0.0147257	Enrich	inf	0.000116993	0.000599543	Enrich	inf	0.015502	0.0493502	0.38613	0.310188	0.401828	5.47644	-1.49103	0.000252854	-0.713313	0.0801695
P67984	Rpl22	60S ribosomal protein L22	RL22_MOUSE	4.10226	5.64468	4.27059	1.70327	4.44024	6.51963	5.66169	0	NotSig	0.54013	0.877133	0.899707	NotSig	1.07497	0.201795	0.298873	NotSig	0.147571	0.416902	0.448647	NotSig	#NAME?	0.391002	0.49801	-0.101466	0.486577	0.55968	6.09115	-2.61603	5.75828e-30	-2.03286	4.38588e-27
P68033	Actc1	Actin, alpha cardiac muscle 1	ACTC_MOUSE	7.40815	7.51533	7.68979	7.8088	10.3831	9.28915	11.5037	10.8189	Enrich	2.82164	0.00339983	0.00887894	NotSig	1.64762	0.0164497	0.0592903	Enrich	3.78868	3.89287e-05	0.000569659	Enrich	2.9083	0.00315534	0.0210083	1.13745	0.00674297	0.0263349	0.721479	-0.930348	0.372551	-5.82585	0.100123
P68037	Ube2l3	Ubiquitin-conjugating enzyme E2 L3	UB2L3_MOUSE	0	0	0	4.08148	5.33838	5.17519	6.12468	6.70233	Enrich	inf	4.10619e-06	0.000146061	Enrich	inf	0.000102195	0.00287315	Enrich	inf	0.000116047	0.000599543	NotSig	1.48662	0.161955	0.237856	0.847282	0.037048	0.0836893	7.37087	-0.20573	0.293942	0.367482	1.63076e-10
P68040	Rack1	Receptor of activated protein C kinase 1	RACK1_MOUSE	2.44677	4.50958	5.26835	5.81776	7.28939	5.78714	5.40666	5.65432	NotSig	3.4736	0.0396046	0.0708145	NotSig	0.0751044	0.487206	0.542019	NotSig	0.00820938	0.84137	0.854777	NotSig	-0.485657	0.8214	0.858986	-1.83841	0.0105183	0.035819
P68181;P68181-2;P68181-3;P68181-4	Prkacb	cAMP-dependent protein kinase catalytic subunit beta;Isoform 2 of cAMP-dependent protein kinase catalytic subunit beta;Isoform 3 of cAMP-dependent protein kinase catalytic subunit beta;Isoform 4 of cAMP-dependent protein kinase catalytic subunit beta	KAPCB_MOUSE	2.42251	3.57242	2.31251	4.61193	8.04771	6.11749	8.53792	7.5846	NotSig	4.25527	0.0267818	0.0506882	NotSig	1.83139	0.123726	0.229665	Enrich	4.99717	0.0175588	0.0295809	NotSig	3.04162	0.0375966	0.074794	0.490619	0.112432	0.183881	8.98549	0.952758	1.87689e-38	0.781228	2.06574e-27
P68254;P68254-2	Ywhaq	14-3-3 protein theta;Isoform 2 of 14-3-3 protein theta	1433T_MOUSE	6.07952	6.26152	6.28395	6.61259	9.12283	8.12059	9.33402	9.11423	Enrich	2.93644	0.0030945	0.00822211	Enrich	1.88568	0.00388237	0.0187766	Enrich	3.03395	0.000171714	0.000685185	Enrich	2.41122	0.00281837	0.020262	0.238486	0.404635	0.481899	7.07171	-2.32646	2.25036e-40	-1.03327	1.11839e-09
P68368	Tuba4a	Tubulin alpha-4A chain	TBA4A_MOUSE	8.18185	8.51529	8.60351	8.53252	13.2329	11.6955	12.438	11.8282	Enrich	4.95151	0.000482393	0.0017478	Enrich	3.27405	0.000795407	0.00611498	Enrich	3.87433	6.58706e-05	0.000569659	Enrich	3.23453	0.0015749	0.0155731	-0.751519	0.0343556	0.0792802	8.48549	1.26937	9.36619e-41	0.064043	0.0701747
P68372	Tubb4b	Tubulin beta-4B chain	TBB4B_MOUSE	8.24451	8.407	7.89002	8.21381	12.976	11.4828	12.0077	12.1426	Enrich	4.6236	0.000736826	0.00248928	Enrich	3.18199	0.00134797	0.00868181	Enrich	4.10954	8.84756e-06	0.000569659	Enrich	3.86556	0.001774	0.0161382	-0.936141	0.0111125	0.0369157	6.75225	-0.361019	0.67769	0.55051	1.17679e-07
P68404-2	Prkcb	Isoform Beta-II of Protein kinase C beta type	KPCB_MOUSE	5.00956	5.40167	5.7072	6.05385	7.70501	6.68451	8.51424	7.96369	Enrich	2.61283	0.00393507	0.0100671	NotSig	1.38291	0.0738695	0.157446	Enrich	2.62589	0.00798721	0.0154001	Enrich	1.8776	0.00166726	0.0157578	0.855769	0.0285036	0.0696702	6.8179	0.960091	9.91456e-12	-2.20786	3.78551e-77
P68510	Ywhah	14-3-3 protein eta	1433F_MOUSE	1.27272	3.73491	3.00649	4.82428	9.71374	7.80014	8.53367	8.16248	Enrich	6.68585	0.00656629	0.0155801	NotSig	3.2103	0.0471442	0.132422	Enrich	4.76787	0.014346	0.0250661	Enrich	3.12614	0.00531604	0.0279035	-1.16053	0.00536296	0.0229102	8.16926	1.23404	5.03423e-31	0.78888	2.55176e-22
P69566	Ranbp9	Ran-binding protein 9	RANB9_MOUSE	0	0	0	0	4.00851	1.13722	5.27748	4.68073	NotSig	inf	0.0588068	0.0966099	NotSig	inf	0.391002	0.454376	Enrich	inf	0.00025996	0.000880548	NotSig	inf	0.0263745	0.0620137	0.368596	0.418909	0.494422	5.21604	-0.193189	0.139506	0.187596	0.229712
P70124	Serpinb5	Serpin B5	SPB5_MOUSE	3.52553	1.36619	3.91209	3.5149	4.05545	1.38425	2.68398	3.56389	NotSig	0.323613	0.795639	0.828164	NotSig	0.0738425	0.992895	0.994231	NotSig	-2.00071	0.488594	0.519754	NotSig	-1.68296	0.974896	0.980828	-2.09429	0.446828	0.52121	0			#NAME?	0.390612
P70168	Kpnb1	Importin subunit beta-1	IMB1_MOUSE	7.7652	7.38662	8.8247	5.83907	8.10746	7.40114	7.47985	7.24065	NotSig	0.271503	0.355295	0.4359	NotSig	-0.0552409	0.965142	0.974276	NotSig	-1.4	0.124419	0.156561	NotSig	0.626465	0.206382	0.293445	-0.399191	0.29708	0.388851	6.60979	0.231309	0.00153926	-0.185628	0.758299
P70175	Dlg3	Disks large homolog 3	DLG3_MOUSE	0.823974	1.54011	3.4811	3.85948	7.60759	5.39915	7.20805	6.32883	Enrich	6.46694	0.00351802	0.00917021	NotSig	3.5433	0.017162	0.0612763	NotSig	2.86682	0.0541179	0.0770542	Enrich	2.54832	0.00218595	0.0176902	-0.395027	0.0397584	0.0881279	5.53892	1.24659	8.08908e-08	-1.03047	1.1338e-09
P70188;P70188-2	Kifap3	Kinesin-associated protein 3;Isoform KAP3B of Kinesin-associated protein 3	KIFA3_MOUSE	0	0	0	0	5.57143	4.14861	5.67704	4.74277	Enrich	inf	3.51976e-05	0.000305294	Enrich	inf	0.00392421	0.0189102	Enrich	inf	6.2933e-05	0.000569659	NotSig	inf	0.0218618	0.0569585	0.118136	0.653704	0.715202	8.44031	0.822068	1.43641e-23	-0.543435	1.91716e-05
P70195	Psmb7	Proteasome subunit beta type-7	PSB7_MOUSE	5.6566	5.31041	6.32952	5.87714	6.34917	6.28467	6.60222	6.25849	Enrich	0.724717	0.0262145	0.049683	NotSig	0.950091	0.0225472	0.076402	NotSig	0.23612	0.308736	0.352193	NotSig	0.304047	0.375859	0.488009	0.232528	0.298267	0.389876	4.82612	-1.27398	0.00679969	-1.0312	0.000653597
P70206	Plxna1	Plexin-A1	PLXA1_MOUSE	0	0	0	0.771777	3.18696	0.870303	4.65778	4.74262	NotSig	inf	0.0585554	0.0966099	NotSig	inf	0.391002	0.454376	Enrich	inf	0.000190875	0.000728582	Enrich	3.83362	0.0103201	0.0408588	0.867419	0.263777	0.355258	7.08314	2.71926	5.45045e-29	6.09734	8.27622e-78
P70211;P70211-2;P70211-3	Dcc	Netrin receptor DCC;Isoform C of Netrin receptor DCC;Isoform B of Netrin receptor DCC	DCC_MOUSE	0	0	0	0	2.60139	1.60147	5.25788	4.7761	NotSig	inf	0.0661106	0.102425	NotSig	inf	0.18209	0.288495	Enrich	inf	0.000188329	0.000723954	NotSig	inf	0.027134	0.0631325	2.2138	0.0589668	0.116748	3.73545	1.50319	0.018731	1.18407	0.0102685
P70232	Chl1	Neural cell adhesion molecule L1-like protein	NCHL1_MOUSE	0	0	0	0	4.73271	1.95545	4.7128	4.36728	Enrich	inf	0.00312898	0.00828172	NotSig	inf	0.18282	0.288495	Enrich	inf	0.000531372	0.00150792	NotSig	inf	0.0362872	0.0732782	-0.277547	0.975526	0.979588	7.33457	1.09283	5.85527e-24	1.40796	8.02563e-28
P70236	Map2k6	Dual specificity mitogen-activated protein kinase kinase 6	MP2K6_MOUSE	0	0	0	0	0.429827	0	5.07209	6.8325	NotSig	inf	0.391002	0.443422	NotSig				Enrich	inf	0.00054417	0.00153061	NotSig	inf	0.0988625	0.154455	5.92551	0.000199431	0.00413694	2.83787	0.531532	0.185505	-0.099815	0.165592
P70245	Ebp	3-beta-hydroxysteroid-Delta(8),Delta(7)-isomerase	EBP_MOUSE	1.24655	1.1442	0	2.12815	0	0	4.32711	2.11644	NotSig	#NAME?	0.391002	0.443422	NotSig	#NAME?	0.391002	0.454376	Enrich	inf	0.0216753	0.0351138	NotSig	-0.0359944	0.996679	0.997389	inf	0.0216753	0.058144	4.24892	-1.66982	0.00200551	0.205851	0.682593
P70265	Pfkfb2	6-phosphofructo-2-kinase/fructose-2,6-bisphosphatase 2	F262_MOUSE	0	0	0	0	3.62074	0.994651	5.45111	5.12087	NotSig	inf	0.058101	0.0966099	NotSig	inf	0.391002	0.454376	Enrich	inf	0.00015392	0.000654021	NotSig	inf	0.0209155	0.0556756	1.09531	0.228174	0.316556	3.51362	0.51311	0.307402	0.016198	0.835104
P70268;P70268-2	Pkn1	Serine/threonine-protein kinase N1;Isoform 2 of Serine/threonine-protein kinase N1	PKN1_MOUSE	0	0	0	0	0	0	2.64588	2.0023	NotSig				NotSig				Enrich	inf	0.00471413	0.00982196	NotSig	inf	0.108546	0.167465	inf	0.00471413	0.0210861	3.69751	-0.764228	0.406022	0.001219	0.142148
P70280	Vamp7	Vesicle-associated membrane protein 7	VAMP7_MOUSE	1.08868	1.0273	0.878835	1.34841	5.45683	4.26343	5.85205	5.99968	Enrich	3.32805	0.0216491	0.0421935	NotSig	2.20081	0.04898	0.137	Enrich	4.44527	0.0108364	0.0197395	Enrich	4.50278	0.00922186	0.0381215	0.218121	0.39535	0.473087
P70290	Mpp1	55 kDa erythrocyte membrane protein	EM55_MOUSE	0	0	0	0	5.98572	5.68408	7.28524	6.41172	Enrich	inf	0.000264692	0.00108642	Enrich	inf	0.000219391	0.00335351	Enrich	inf	4.71072e-05	0.000569659	NotSig	inf	0.0177643	0.0523628	1.26637	0.0137075	0.042229	4.80707	0.792776	0.0105474	-0.525146	0.0126299
P70296	Pebp1	Phosphatidylethanolamine-binding protein 1	PEBP1_MOUSE	5.29549	5.74292	5.77233	5.6984	7.78375	7.54504	9.68933	8.90262	Enrich	2.46167	0.00110929	0.00346654	Enrich	1.75048	0.00484268	0.0225992	Enrich	3.95723	4.23165e-05	0.000569659	Enrich	3.11393	0.00127978	0.0151013	1.93382	0.00184827	0.0117331	7.63704	-0.255214	0.966352	-0.283636	0.412756
P70297	Stam	Signal transducing adapter molecule 1	STAM1_MOUSE	0	0	0	0	7.39387	6.06678	8.6328	7.34574	Enrich	inf	4.96546e-06	0.000146626	Enrich	inf	0.000169981	0.00311541	Enrich	inf	3.37431e-05	0.000569659	NotSig	inf	0.0187401	0.0534531	1.27785	0.00552898	0.0233931	6.17668	0.453292	8.45208e-05	0.367994	0.0801695
P70302	Stim1	Stromal interaction molecule 1	STIM1_MOUSE	0	0	0	5.58181	4.17429	0.975288	3.97137	5.64461	Enrich	inf	0.000376143	0.00144066	NotSig	inf	0.391002	0.454376	Enrich	inf	0.000504561	0.00144759	NotSig	-0.0116759	0.831688	0.867164	-0.209213	0.569092	0.638106	5.73062	-0.229368	0.632848	-0.746439	2.15464e-05
P70303;P70303-2;P70303-3	Ctps2	CTP synthase 2;Isoform 2 of CTP synthase 2;Isoform 3 of CTP synthase 2	PYRG2_MOUSE	0	0	0	1.19354	5.41927	2.33111	5.66376	5.10979	Enrich	inf	2.67013e-05	0.000259465	NotSig	inf	0.18328	0.288495	Enrich	inf	0.000123178	0.000601014	NotSig	2.3942	0.0420069	0.0800686	0.278916	0.375069	0.466258	5.2831	1.17962	0.0169649	1.80099	3.11168e-12
P70318	Tial1	Nucleolysin TIAR	TIAR_MOUSE	0	0	0	0	7.30403	4.82892	6.17539	6.38524	Enrich	inf	9.14079e-05	0.000515034	NotSig	inf	0.0634011	0.145715	Enrich	inf	0.000411548	0.0012325	NotSig	inf	0.0394604	0.0768699	-1.07444	0.0450677	0.0968989	6.19282	-0.732077	0.973949	-0.272873	0.859623
P70333	Hnrnph2	Heterogeneous nuclear ribonucleoprotein H2	HNRH2_MOUSE	0	0	1.23375	0	6.39839	2.35948	4.73928	3.86051	Enrich	inf	0.000106219	0.000556387	NotSig	inf	0.183664	0.288495	NotSig	1.8156	0.0646921	0.0885503	Enrich	inf	0.00596042	0.0296252	-1.73504	0.00189449	0.0118301	4.00478	-1.97076	0.00268033	-2.34384	1.81615e-14
P70336;P70336-2	Rock2	Rho-associated protein kinase 2;Isoform 2 of Rho-associated protein kinase 2	ROCK2_MOUSE	0	0	1.37431	3.90306	5.27616	4.25141	5.96915	6.05787	Enrich	inf	0.00010456	0.000553393	Enrich	inf	0.00130934	0.00853642	Enrich	4.41662	0.00834902	0.0159689	Enrich	2.17597	0.00330863	0.0214793	0.71698	0.0539239	0.109976	8.26057	-0.020394	2.32352e-06	-0.891249	1.27223e-12
P70349	Hint1	Histidine triad nucleotide-binding protein 1	HINT1_MOUSE	1.22881	2.63054	1.29984	2.27571	6.91885	6.80864	8.95869	8.0607	Enrich	4.1035	0.0169044	0.0343779	NotSig	2.56039	0.0702607	0.152317	Enrich	5.82287	0.00912522	0.0172465	NotSig	4.57894	0.0203881	0.0548211	2.01229	0.000824785	0.00770334	7.35098	-0.948506	1.77086e-05	-0.948399	1.14072e-06
P70372	Elavl1	ELAV-like protein 1	ELAV1_MOUSE	0	0	0	0.626122	6.19519	2.36874	4.32845	2.21737	Enrich	inf	0.000160512	0.000741864	NotSig	inf	0.182132	0.288495	Enrich	inf	0.000144882	0.000639485	NotSig	3.14163	0.601567	0.673058	-1.96528	0.00158044	0.0106367	5.58332	-0.419048	0.996613	-0.260241	0.0613206
P70392	Rasgrf2	Ras-specific guanine nucleotide-releasing factor 2	RGRF2_MOUSE	0	0	0	0	5.21661	3.95458	6.02791	6.16255	Enrich	inf	6.97641e-05	0.00043154	Enrich	inf	0.00332535	0.0165956	Enrich	inf	0.000203741	0.000750364	NotSig	inf	0.0293606	0.0657107	0.87557	0.0524312	0.107949	7.52275	2.58464	1.0847e-41	5.01599	8.87633e-95
P70398	Usp9x	Probable ubiquitin carboxyl-terminal hydrolase FAF-X	USP9X_MOUSE	5.16284	2.14195	1.60214	5.09116	7.51685	6.48045	8.15989	7.44041	NotSig	1.97263	0.0309247	0.057191	NotSig	3.14797	0.038635	0.113808	Enrich	5.48357	0.00697983	0.0137535	Enrich	2.32727	0.0030691	0.0209399	0.647803	0.210405	0.298194	6.29001	1.40127	5.95478e-07	1.39461	2.87575e-11
P70399;P70399-5	Tp53bp1	TP53-binding protein 1;Isoform 2 of TP53-binding protein 1	TP53B_MOUSE	0	0	0	0	3.40901	0.906621	0.576836	0	NotSig	inf	0.0578534	0.0966099	NotSig	inf	0.391002	0.454376	NotSig	inf	0.391002	0.422677					-4.09036	0.0838297	0.147659
P70404	Idh3g	Isocitrate dehydrogenase [NAD] subunit gamma 1, mitochondrial	IDHG1_MOUSE	6.37399	6.15867	5.48067	6.49133	6.43565	9.92577	6.10844	6.79853	NotSig	-0.138703	0.897872	0.916876	NotSig	2.97201	0.0520477	0.143177	NotSig	-0.784863	0.754476	0.774452	NotSig	0.144302	0.499348	0.580066	-0.328075	0.138145	0.216571	5.96187	-0.493287	0.808453	-1.03685	0.000141256
P70414	Slc8a1	Sodium/calcium exchanger 1	NAC1_MOUSE	2.10209	4.65268	0	5.21335	7.13835	6.03173	7.59943	7.55115	NotSig	3.78049	0.0276955	0.051988	Enrich	1.42832	0.0080389	0.0331014	Enrich	inf	4.80352e-05	0.000569659	Enrich	2.35032	0.0109556	0.0418426	0.501062	0.115119	0.186746
P70425	Rit2	GTP-binding protein Rit2	RIT2_MOUSE	0	0	0	0	6.03628	3.27626	5.19366	4.48044	Enrich	inf	6.93218e-07	9.5355e-05	NotSig	inf	0.0600319	0.145715	Enrich	inf	0.000226365	0.000802769	NotSig	inf	0.0385523	0.0758898	-0.804724	0.0388141	0.0866367	8.44921	2.64823	2.15476e-76	1.71681	3.50607e-61
P70429;P70429-2	Evl	Ena/VASP-like protein;Isoform 1 of Ena/VASP-like protein	EVL_MOUSE	0	0	0	0	2.36035	1.64092	4.77693	4.18547	NotSig	inf	0.0607763	0.0971868	NotSig	inf	0.181998	0.288495	Enrich	inf	0.000105035	0.000590983	NotSig	inf	0.0627056	0.106763	2.14954	0.0543654	0.110642	7.56915	1.95331	1.51412e-33	1.18276	3.61739e-26
P70441	Slc9a3r1	Na(+)/H(+) exchange regulatory cofactor NHE-RF1	NHRF1_MOUSE	0	0	0	3.67258	0	3.41502	2.89619	4.25892	NotSig				NotSig	inf	0.0664047	0.147678	NotSig	inf	0.0576826	0.0813078	NotSig	0.589349	0.283908	0.385911	inf	0.0576826	0.115077	1.53031	-5.63073	1.96838e-07	-5.48986	2.88529e-12
P70445	Eif4ebp2	Eukaryotic translation initiation factor 4E-binding protein 2	4EBP2_MOUSE	0	0	0	0	1.51927	0.770316	4.24403	3.81543	NotSig	inf	0.188737	0.24904	NotSig	inf	0.391002	0.454376	Enrich	inf	0.00158477	0.00379208	NotSig	inf	0.056234	0.0978179	2.38333	0.0482459	0.101736	4.02659	0.676153	0.0673899	-0.152303	0.237462
P70663	Sparcl1	SPARC-like protein 1	SPRL1_MOUSE	2.82057	1.21784	0	7.78634	6.03266	4.20557	3.51866	7.00193	NotSig	2.52096	0.0521752	0.0903741	NotSig	1.42637	0.0874886	0.177135	Enrich	inf	0.000297371	0.000969498	NotSig	-0.739592	0.398324	0.505275	-2.60663	5.02428e-05	0.00241353	7.92921	-4.16479	2.70304e-101	-2.55067	0.997767
P70670;Q60817	Naca	Nascent polypeptide-associated complex subunit alpha, muscle-specific form;Nascent polypeptide-associated complex subunit alpha	NACAM_MOUSE;NACA_MOUSE	1.87921	2.7677	1.75759	1.12611	3.56299	2.9463	2.9387	0	NotSig	0.82326	0.220601	0.284814	NotSig	0.182466	0.900276	0.923182	NotSig	-0.0983786	0.371369	0.417065	NotSig	#NAME?	0.391002	0.49801	-0.73705	0.0689465	0.130157	5.25093	-2.23894	7.5746e-11	-1.32817	1.70329e-07
P70671	Irf3	Interferon regulatory factor 3	IRF3_MOUSE	0	0	0	0	1.6674	0.590782	4.45438	1.86594	NotSig	inf	0.181694	0.245991	NotSig	inf	0.391002	0.454376	Enrich	inf	0.000202808	0.000747887	NotSig	inf	0.5	0.580066	2.24602	0.0598311	0.118104	4.06867	-1.82403	0.0671396	0.434454	0.0282016
P70677	Casp3	Caspase-3	CASP3_MOUSE	0	0	0	0	0	0	1.45356	1.19726	NotSig				NotSig				NotSig	inf	0.187072	0.223722	NotSig	inf	0.5	0.580066	inf	0.187072	0.273704	1.90804	-1.39001	1	-1.60684	0.139683
P70689	Gjb6	Gap junction beta-6 protein	CXB6_MOUSE	0.737563	0	0	0	0.720024	0.664135	3.81987	3.60688	NotSig	-0.0808815	0.986976	0.989855	NotSig	inf	0.391002	0.454376	Enrich	inf	0.000111641	0.000597769	NotSig	inf	0.0292821	0.0655873	3.06609	0.0209011	0.0568494	1.98767	-5.06292	1.98378e-13	-3.3288	0.00030541
P70694	Akr1c6	Estradiol 17 beta-dehydrogenase 5	DHB5_MOUSE	5.40606	3.21576	5.14649	5.85053	7.89371	6.66253	8.21808	7.60837	Enrich	2.46319	0.00104806	0.0033243	NotSig	1.6808	0.159888	0.281099	NotSig	0.916398	0.210542	0.247612	NotSig	1.45567	0.200984	0.286785	0.42742	0.514656	0.585923
P70704;P70704-3	Atp8a1	Phospholipid-transporting ATPase IA;Isoform 3 of Phospholipid-transporting ATPase IA	AT8A1_MOUSE	7.71216	7.97735	7.73494	7.22643	8.44025	8.09131	7.86107	8.12412	NotSig	0.69378	0.0603921	0.0968528	NotSig	0.0282139	0.80248	0.835459	NotSig	-0.22612	0.854395	0.866476	NotSig	0.837971	0.0361865	0.0731969	-0.556185	0.096128	0.163548	6.34245	-1.34875	4.82885e-09	-1.20954	2.27422e-20
P80313	Cct7	T-complex protein 1 subunit eta	TCPH_MOUSE	4.78355	4.93775	3.47401	3.81498	7.36663	6.49778	7.33432	6.93964	Enrich	2.48716	0.00812826	0.0186584	NotSig	1.5139	0.0212152	0.0731937	NotSig	3.1929	0.0426868	0.0625476	Enrich	3.00354	0.00343334	0.0219343	-0.0561263	0.933529	0.944806	7.48852	-0.18115	0.224298	-0.368281	0.0288592
P80314	Cct2	T-complex protein 1 subunit beta	TCPB_MOUSE	4.1914	3.31133	3.07331	3.77415	7.30557	6.0709	7.18604	7.17316	Enrich	2.81988	0.0101038	0.0222819	NotSig	2.25541	0.0835647	0.171964	Enrich	3.5288	0.0277502	0.0433398	Enrich	3.34392	0.00190809	0.0167614	-0.138887	0.701621	0.756799	7.0143	-0.214589	0.190019	-0.142194	0.607497
P80315	Cct4	T-complex protein 1 subunit delta	TCPD_MOUSE	5.67669	5.82785	7.42667	6.03753	7.61271	7.02828	6.57244	6.88881	Enrich	1.92594	0.00117396	0.00365616	NotSig	1.04446	0.0968336	0.19094	NotSig	-1.13167	0.196567	0.233713	NotSig	0.667263	0.17561	0.255905	-1.0611	0.0027589	0.015149	5.98947	-0.81905	0.21884	-0.61062	0.0225945
P80316	Cct5	T-complex protein 1 subunit epsilon	TCPE_MOUSE	3.89113	2.67731	2.57786	1.57795	7.58894	5.81019	6.90198	7.30914	Enrich	3.50046	0.00419044	0.0105916	NotSig	2.77463	0.0365904	0.10936	Enrich	3.88972	0.0159731	0.0273756	Enrich	5.1383	0.00770783	0.0340137	-0.690569	0.0346524	0.079717	7.00056	-0.251113	0.304924	-0.000283	0.966823
P80317	Cct6a	T-complex protein 1 subunit zeta	TCPZ_MOUSE	3.73402	3.89913	3.3115	3.27812	7.20278	5.6807	6.66406	7.09755	Enrich	3.1726	0.0109922	0.0238583	Enrich	1.87466	0.000466685	0.00464955	Enrich	3.51396	7.36469e-05	0.000569659	Enrich	3.93717	0.00137129	0.0151013	-0.542605	0.0500503	0.104431
P80318	Cct3	T-complex protein 1 subunit gamma	TCPG_MOUSE	4.41894	4.40341	2.74745	3.84079	7.26024	5.72019	6.55635	7.04325	Enrich	2.71927	0.00603234	0.0145008	Enrich	1.36832	0.00758977	0.0316626	Enrich	3.39413	0.0241874	0.0384665	Enrich	3.25193	0.000524042	0.0125227	-0.685675	0.025562	0.0646646	6.64104	-0.403362	0.977186	-0.509864	0.0565822
P80560	Ptprn2	Receptor-type tyrosine-protein phosphatase N2	PTPR2_MOUSE	0	0	0.779843	1.90576	3.19775	3.59087	6.58654	6.25757	NotSig	inf	0.0587486	0.0966099	NotSig	inf	0.0580553	0.145715	Enrich	5.68773	0.00312782	0.00692952	Enrich	4.21279	0.00598894	0.0296252	2.83382	0.0477335	0.101128	6.30264	2.99898	1.20583e-15	1.46767	3.46043e-10
P81117	Nucb2	Nucleobindin-2	NUCB2_MOUSE	0.912931	1.04487	0	5.72992	1.74654	3.43921	1.54993	5.58792	NotSig	1.60574	0.600663	0.650205	NotSig	1.29926	0.102303	0.198776	NotSig	inf	0.20455	0.241106	NotSig	-0.234768	0.685524	0.743732	-0.953434	0.902273	0.921051	5.07913	0.814425	0.00050543	-1.47403	4.22411e-11
P83741;P83741-2;P83741-3;P83741-4;P83741-5	Wnk1	Serine/threonine-protein kinase WNK1;Isoform 2 of Serine/threonine-protein kinase WNK1;Isoform 3 of Serine/threonine-protein kinase WNK1;Isoform 4 of Serine/threonine-protein kinase WNK1;Isoform 5 of Serine/threonine-protein kinase WNK1	WNK1_MOUSE	0	0	0	0	3.47828	4.42946	6.23476	5.4609	NotSig	inf	0.063178	0.0992022	Enrich	inf	0.00163517	0.00977428	Enrich	inf	6.44601e-05	0.000569659	NotSig	inf	0.025085	0.0604557	1.95347	0.104715	0.174064	7.43702	-1.25292	0.000887642	1.60994	3.92185e-32
P84075	Hpca	Neuron-specific calcium-binding protein hippocalcin	HPCA_MOUSE	4.21743	4.69884	4.4699	4.81017	8.03404	6.55929	7.09047	6.16256	Enrich	3.91442	8.41128e-05	0.000485946	Enrich	1.83744	0.00537905	0.0244276	Enrich	2.56511	0.00358104	0.00777744	NotSig	1.3279	0.0479632	0.0875651	-0.996626	0.0485538	0.102044	6.13685	0.684263	0.00106189	-4.27572	1.49849e-207
P84084	Arf5	ADP-ribosylation factor 5	ARF5_MOUSE	6.15667	6.62078	6.45514	6.77693	8.93189	8.30927	10.3944	9.37735	Enrich	2.67784	0.00244445	0.00672896	Enrich	1.74457	0.00317688	0.0160047	Enrich	3.90978	0.000122387	0.000601014	Enrich	2.55654	0.000943694	0.0136148	1.43224	0.00205862	0.0125882	8.50611	0.666728	4.18968e-20	-0.032636	0.61912
P84086	Cplx2	Complexin-2	CPLX2_MOUSE	6.1866	6.47217	6.57928	6.48613	9.26239	8.81135	12.34	11.158	Enrich	2.87705	0.00594284	0.0143232	Enrich	2.29059	0.00124481	0.0083337	Enrich	5.80798	6.94322e-06	0.000538381	Enrich	4.44377	0.00215882	0.0176902	3.14847	0.000854605	0.00780198	10.688	3.21135	5.7206e-222	1.03056	1.18624e-68
P84089	Erh	Enhancer of rudimentary homolog	ERH_MOUSE	0	1.79463	1.14633	0	6.18533	5.84805	0.585326	0	Enrich	inf	0.000484946	0.00175243	NotSig	0.996579	0.105171	0.203163	NotSig	-2.49974	0.683197	0.708125					-6.31126	0.00043154	0.00577711	0.905812	-4.16498	0.000887052	-2.46956	0.0104256
P84091	Ap2m1	AP-2 complex subunit mu	AP2M1_MOUSE	6.58892	6.05192	6.0371	6.87005	8.82083	7.54212	9.68391	9.53085	NotSig	1.03077	0.111404	0.161839	Enrich	1.52141	0.00607027	0.0265574	Enrich	3.56433	0.000834152	0.00217958	Enrich	2.65368	0.00148904	0.0153416	0.901609	0.01961	0.0546212	7.1261	0.716869	5.13595e-07	0.256607	0.00955165
P84096	Rhog	Rho-related GTP-binding protein RhoG	RHOG_MOUSE	5.2127	5.42851	2.91935	4.31665	6.61672	5.95599	6.19714	5.42339	NotSig	1.34052	0.0273059	0.0515382	NotSig	0.580899	0.127749	0.23598	NotSig	2.60327	0.0524403	0.0748141	Enrich	1.1154	0.00518204	0.0275885	-0.464902	0.12102	0.193819	3.05584	-6.31971	7.37322e-53	-2.42349	0.00547938
P84099	Rpl19	60S ribosomal protein L19	RL19_MOUSE	7.56066	7.69267	7.34244	6.59921	7.40643	8.13293	7.22077	6.86912	NotSig	-0.284887	0.761721	0.798298	NotSig	0.331977	0.307288	0.422641	NotSig	-0.255085	0.81308	0.829266	NotSig	0.186328	0.414949	0.522824	-0.200099	0.542503	0.612088	5.22072	-1.26683	0.248057	0.673031	3.83542e-05
P84104;P84104-2	Srsf3	Serine/arginine-rich splicing factor 3;Isoform Short of Serine/arginine-rich splicing factor 3	SRSF3_MOUSE	0	1.32213	0.974414	0.915823	5.57804	4.73115	3.93531	0	Enrich	inf	0.000336806	0.00131488	NotSig	1.47919	0.0799166	0.166132	NotSig	2.06263	0.0544145	0.0773231	NotSig	#NAME?	0.391002	0.49801	-1.79222	0.00647378	0.0256886	5.94084	-1.06323	0.0034494	-1.13227	1.19116e-06
P84309	Adcy5	Adenylate cyclase type 5	ADCY5_MOUSE	2.66808	2.75611	5.42784	6.44017	5.87084	5.45509	8.95165	8.38072	NotSig	1.35179	0.134569	0.190952	NotSig	0.802846	0.197338	0.293908	Enrich	3.54563	4.8669e-05	0.000569659	Enrich	1.92793	0.00114622	0.0146456	3.11827	4.68116e-05	0.00241353	7.00417	1.04066	5.23344e-16	-2.17239	4.14071e-77
P97300	Nptn	Neuroplastin	NPTN_MOUSE	0	0	0.906197	4.96305	5.69455	3.47333	6.25934	6.46657	Enrich	inf	0.000621692	0.00215865	NotSig	inf	0.0632938	0.145715	Enrich	4.7895	0.00777429	0.0150402	Enrich	1.48083	0.00589606	0.0295367	0.477159	0.250832	0.340642	8.08342	0.532644	2.58831e-15	-1.58585	8.01582e-63
P97315	Csrp1	Cysteine and glycine-rich protein 1	CSRP1_MOUSE	4.22012	5.29481	3.27699	4.56448	6.49824	5.92628	5.93009	5.64334	NotSig	1.18062	0.220716	0.284828	NotSig	0.58951	0.19564	0.293349	NotSig	2.05823	0.0918365	0.119437	Enrich	1.07445	0.0118915	0.0436383	-0.642971	0.204768	0.292353	3.60154	-5.98488	1.23396e-99	-3.25728	2.27216e-09
P97318;P97318-2;P97318-3;P97318-4;P97318-5;P97318-6;P97318-8	Dab1	Disabled homolog 1;Isoform DAB555 of Disabled homolog 1;Isoform DAB271 of Disabled homolog 1;Isoform DAB197 of Disabled homolog 1;Isoform DAB204 of Disabled homolog 1;Isoform DAB217 of Disabled homolog 1;Isoform DAB553 of Disabled homolog 1	DAB1_MOUSE	0	0	0	0	3.49384	0.872834	6.02103	4.50991	NotSig	inf	0.0577499	0.0966099	NotSig	inf	0.391002	0.454376	Enrich	inf	0.000151864	0.000650296	NotSig	inf	0.0586339	0.100869	1.86882	0.116524	0.188486	6.24625	0.452979	0.00270375	-0.414723	0.00382233
P97350	Pkp1	Plakophilin-1	PKP1_MOUSE	9.27591	10.0345	10.1401	10.0865	9.22734	10.1582	8.9455	9.38297	NotSig	-0.115895	0.886687	0.907477	NotSig	0.232794	0.854228	0.881741	Deplete	-1.1747	0.0191009	0.03164	NotSig	-0.802094	0.156328	0.231283	-0.213493	0.406382	0.483164	0
P97351	Rps3a	40S ribosomal protein S3a	RS3A_MOUSE	5.93678	6.15506	3.75626	4.55273	8.86579	7.23118	5.84127	4.19752	Enrich	3.04132	0.000822527	0.00272196	NotSig	1.11342	0.029065	0.0918205	NotSig	1.30669	0.197075	0.234103	NotSig	-0.554309	0.665904	0.726653	-3.11137	0.000606381	0.0067559
P97355	Sms	Spermine synthase	SPSY_MOUSE	0	0	0	0	3.90984	3.73538	5.01488	3.97907	NotSig	inf	0.0779247	0.117873	NotSig	inf	0.08359	0.171964	Enrich	inf	6.40096e-05	0.000569659	NotSig	inf	0.0449688	0.0839572	-0.509174	0.511373	0.583102	6.51484	1.2019	2.21308e-13	0.949031	2.54665e-09
P97370	Atp1b3	Sodium/potassium-transporting ATPase subunit beta-3	AT1B3_MOUSE	1.81062	0	0.618792	2.69805	6.57581	4.244	4.16448	4.58362	Enrich	4.39244	0.0125866	0.0266051	Enrich	inf	0.000149686	0.00308655	Enrich	3.9224	0.00820738	0.0157503	NotSig	1.42571	0.130911	0.197314	-2.85685	0.0235359	0.0610433	6.73125	-1.93646	3.5718e-22	-0.196186	6.54663e-06
P97371	Psme1	Proteasome activator complex subunit 1	PSME1_MOUSE	5.86006	6.14097	2.22093	3.58238	8.06773	7.09295	8.37746	6.98157	Enrich	2.16161	0.00285246	0.00769046	NotSig	0.905693	0.063706	0.145812	Enrich	5.01415	0.0151516	0.0262176	NotSig	2.4682	0.0701688	0.117059	0.346422	0.432263	0.507082	6.53458	0.477259	5.49053e-07	0.745204	6.67202e-17
P97372	Psme2	Proteasome activator complex subunit 2	PSME2_MOUSE	0	0	0	0	6.19948	4.97973	6.73521	5.55573	Enrich	inf	0.000102199	0.000549994	Enrich	inf	0.000195789	0.00316145	Enrich	inf	0.000348863	0.00108439	NotSig	inf	0.0385113	0.0758622	0.609125	0.266649	0.357923	2.38364	-4.82557	9.039e-09	-1.98295	0.0354693
P97379	G3bp2	Ras GTPase-activating protein-binding protein 2	G3BP2_MOUSE	1.03307	0	0	0	8.54317	5.76294	4.41702	3.37333	Enrich	6.65161	0.00301676	0.00805447	Enrich	inf	0.000589753	0.00512661	Enrich	inf	0.00059828	0.00165045	NotSig	inf	0.0766764	0.125605	-4.27179	0.000155616	0.00363598	9.02366	0.854017	4.3075e-32	0.187345	2.7228e-06
P97390	Vps45	Vacuolar protein sorting-associated protein 45	VPS45_MOUSE	0	0	0	0	4.89565	0.856063	4.03649	4.27077	Enrich	inf	5.92036e-06	0.000146663	NotSig	inf	0.391002	0.454376	Enrich	inf	0.000374779	0.00114387	NotSig	inf	0.0321463	0.0692439	-0.853453	0.0264714	0.0664424	5.13971	-0.474251	0.593463	0.254228	0.148536
P97393	Arhgap5	Rho GTPase-activating protein 5	RHG05_MOUSE	0	0	0	0.302367	4.24079	3.23647	4.96672	4.29134	Enrich	inf	0.000262646	0.00108125	Enrich	inf	0.00275537	0.0142873	Enrich	inf	0.000169261	0.000679173	Enrich	5.85507	0.00230809	0.0180256	0.759955	0.0504949	0.105075	8.7306	-0.547103	0.00144475	0.775801	1.44881e-35
P97411	Ica1	Islet cell autoantigen 1	ICA69_MOUSE	5.54031	4.07561	3.14975	3.27933	5.94344	5.44206	7.34549	6.41444	NotSig	-4.13152	0.880905	0.902567	NotSig	-3.7592	0.644185	0.690544	NotSig	0.994483	0.125498	0.157642	NotSig	2.31848	0.0732648	0.120932	1.44985	0.00358662	0.0178224	6.20479	2.34238	2.44238e-11	0.629958	0.0166124
P97412;P97412-2	Lyst	Lysosomal-trafficking regulator;Isoform 2 of Lysosomal-trafficking regulator	LYST_MOUSE	0	0	0	0	0.644111	0.499065	4.06441	4.23546	NotSig	inf	0.391002	0.443422	NotSig	inf	0.391002	0.454376	Enrich	inf	0.000281917	0.000932894	NotSig	inf	0.0224621	0.0575823	3.71049	0.00943466	0.033402	4.76446	0.906818	0.00633399	0.664371	0.102844
P97427	Crmp1	Dihydropyrimidinase-related protein 1	DPYL1_MOUSE	6.8677	7.30542	6.95609	7.24623	10.3738	9.98301	11.4227	10.5535	Enrich	3.4165	0.000645476	0.00222717	Enrich	2.66031	0.00055965	0.0050635	Enrich	4.46475	2.88515e-05	0.000569659	Enrich	3.23832	0.0048866	0.0268286	1.09527	0.020722	0.0566192	7.75406	2.37668	4.80027e-40	0.610207	4.0743e-10
P97441	Slc30a3	Zinc transporter 3	ZNT3_MOUSE	0	0	0	5.4491	0.822227	0.879587	6.59328	6.37865	NotSig	inf	0.391002	0.443422	NotSig	inf	0.391002	0.454376	Enrich	inf	5.50038e-05	0.000569659	Enrich	0.9265	0.006009	0.0296252	5.48502	0.00456017	0.0205942	1.54391	#NAME?	0.00164846	6.04704	0.257601
P97445	Cacna1a	Voltage-dependent P/Q-type calcium channel subunit alpha-1A	CAC1A_MOUSE	0	0	0	1.89609	2.94725	1.04839	6.86968	6.41618	NotSig	inf	0.0590275	0.0966099	NotSig	inf	0.391002	0.454376	Enrich	inf	7.82752e-05	0.000569659	NotSig	3.70947	0.0238444	0.0591584	3.46856	0.0258314	0.0651185	9.12003	2.58198	1.82471e-98	3.75865	3.15633e-189
P97447	Fhl1	Four and a half LIM domains protein 1	FHL1_MOUSE	5.4501	7.20821	5.70443	6.33014	6.49587	7.23645	8.4713	7.59455	NotSig	0.718349	0.171013	0.236325	NotSig	-0.158243	0.965485	0.974276	Enrich	2.56434	0.0097512	0.0182018	Enrich	1.2271	0.0136295	0.0465523	2.01267	0.000461659	0.00591168	6.21408	0.261412	0.00100038	1.29702	1.29909e-15
P97450	Atp5pf	ATP synthase-coupling factor 6, mitochondrial	ATP5J_MOUSE	8.6022	8.83418	7.83505	8.56746	9.85882	9.88237	10.154	10.1831	Enrich	1.21153	0.0144935	0.0300129	NotSig	0.95866	0.101343	0.197344	Enrich	2.14043	0.0140139	0.0245757	NotSig	1.60703	0.0180627	0.0526776	0.29743	0.339815	0.431516
P97457	Mylpf	Myosin regulatory light chain 2, skeletal muscle isoform	MLRS_MOUSE	0	0	1.50996	0	0	3.41993	0.267307	0	NotSig				NotSig	inf	0.182314	0.288495	NotSig	-5.88244	0.473837	0.504804					inf	0.391002	0.469332	0	#NAME?	0.000372365	#NAME?	0.00639434
P97461	Rps5	40S ribosomal protein S5	RS5_MOUSE	0.949229	0	0.799572	0	0.939432	0	0.822711	0	NotSig	-0.0422726	0.994385	0.995108	NotSig				NotSig	-0.939869	0.981142	0.982855					-1.55492	0.916571	0.931276	7.87838	-1.71833	2.00358e-24	-0.871777	2.53073e-05
P97494	Gclc	Glutamate--cysteine ligase catalytic subunit	GSH1_MOUSE	0.945637	0.717543	2.48941	3.19263	4.82195	4.07637	5.35768	5.22916	Enrich	4.20791	0.00684945	0.0160717	Enrich	3.41344	0.0127035	0.0482046	NotSig	2.56616	0.0390697	0.0579881	Enrich	2.11207	0.00220337	0.0176962	0.600597	0.0972742	0.164655	5.84291	0.173001	0.0316632	-0.149805	0.187472
P97765	Wbp2	WW domain-binding protein 2	WBP2_MOUSE	1.01718	0	2.13448	4.15829	9.81599	9.208	9.9599	8.38997	Enrich	7.86223	0.00277239	0.00750401	Enrich	inf	9.70325e-06	0.00198543	Enrich	6.75654	0.00703138	0.0138266	Enrich	4.20723	0.000797271	0.0133755	0.162894	0.623582	0.689586	8.18955	0.409985	7.03422e-09	1.31128	2.12796e-38
P97772	Grm1	Metabotropic glutamate receptor 1	GRM1_MOUSE	0	0	0	3.31497	6.31516	2.87123	4.96662	4.7697	Enrich	inf	0.000191117	0.000839068	NotSig	inf	0.0779101	0.162925	Enrich	inf	0.000118867	0.000599543	Enrich	1.51657	0.0108877	0.0418426	-1.41799	0.00938782	0.0332946	7.97157	1.20843	3.96039e-26	1.22785	1.35958e-16
P97792	Cxadr	Coxsackievirus and adenovirus receptor homolog	CXAR_MOUSE	0	0	0	0	4.70536	3.22742	6.01425	4.47885	Enrich	inf	4.49045e-05	0.000346359	NotSig	inf	0.0606289	0.145715	Enrich	inf	0.000258515	0.000876688	NotSig	inf	0.038459	0.0758175	1.40648	0.0145485	0.0439687	4.92256	2.70002	3.03125e-08	1.20692	1.00208e-05
P97797-2	Sirpa	Isoform 2 of Tyrosine-protein phosphatase non-receptor type substrate 1	SHPS1_MOUSE	0.597496	0	0.878413	5.30024	6.72713	5.50721	7.69536	6.9626	Enrich	6.98058	0.000275158	0.0011222	Enrich	inf	9.19844e-05	0.00287315	Enrich	6.36088	0.00304312	0.00676424	Enrich	1.63689	0.00863258	0.0362856	0.677173	0.169004	0.253814	6.85474	-0.334916	0.0393557	-0.472665	0.0676536
P97798;P97798-2;P97798-3;P97798-4;P97798-5	Neo1	Neogenin;Isoform 2 of Neogenin;Isoform 3 of Neogenin;Isoform 4 of Neogenin;Isoform 5 of Neogenin	NEO1_MOUSE	0	0	0	0.915223	4.63313	3.0513	6.44724	5.68617	Enrich	inf	0.00198543	0.00567561	NotSig	inf	0.0584342	0.145715	Enrich	inf	7.7423e-05	0.000569659	Enrich	4.12293	0.0126566	0.0451611	1.66493	0.019915	0.0550978	6.31012	-0.512201	0.351303	2.02296	1.01576e-21
P97807;P97807-2	Fh	Fumarate hydratase, mitochondrial;Isoform Cytoplasmic of Fumarate hydratase, mitochondrial	FUMH_MOUSE	4.87949	5.24984	4.74197	6.12328	5.53541	5.54254	5.70513	6.90362	NotSig	0.363975	0.352785	0.433106	NotSig	0.296831	0.378754	0.454376	Enrich	0.967043	0.0179282	0.0301148	NotSig	0.741934	0.0367489	0.0737909	0.197767	0.447529	0.521607
P97822;P97822-2	Anp32e	Acidic leucine-rich nuclear phosphoprotein 32 family member E;Isoform 2 of Acidic leucine-rich nuclear phosphoprotein 32 family member E	AN32E_MOUSE	0	1.53725	1.34741	0	2.40568	6.42868	0	0	NotSig	inf	0.188648	0.24904	NotSig	2.42415	0.046138	0.130411	NotSig	#NAME?	0.391002	0.422677					#NAME?	0.188648	0.275176	5.59227	-1.46328	0.0202512	-1.64887	3.57588e-12
P97823;P97823-2	Lypla1	Acyl-protein thioesterase 1;Isoform 2 of Acyl-protein thioesterase 1	LYPA1_MOUSE	2.57507	2.14947	5.08258	1.61039	4.6243	2.36888	5.67398	5.34247	NotSig	0.45468	0.268173	0.340008	NotSig	0.457924	0.909373	0.93	NotSig	0.480063	0.200161	0.2372	NotSig	3.20181	0.027245	0.0631375	0.976745	0.0478741	0.101352	5.13779	0.645799	0.0142205	0.958452	6.96171e-06
P97825	Jpt1	Jupiter microtubule associated homolog 1	JUPI1_MOUSE	0	2.00735	4.71368	0	0	4.91255	3.69633	1.80904	NotSig				NotSig	1.93951	0.0872009	0.176957	NotSig	-0.968706	0.152566	0.186657	NotSig	inf	0.5	0.580066	inf	0.00515259	0.0224572
P97858	Slc35b1	Solute carrier family 35 member B1	S35B1_MOUSE	0	0	0.950848	0.979486	0	0	3.09556	2.04642	NotSig				NotSig				NotSig	3.29841	0.26211	0.302613	NotSig	1.18652	0.697961	0.753913	inf	0.117023	0.188882	6.45837	-0.598865	0.390801	-0.512078	0.797425
P98084	Apba2	Amyloid-beta A4 precursor protein-binding family A member 2	APBA2_MOUSE	0	0	0	0	3.23929	0.765516	5.97103	4.9117	NotSig	inf	0.0598683	0.0966099	NotSig	inf	0.391002	0.454376	Enrich	inf	7.50857e-05	0.000569659	Enrich	inf	0.0132628	0.0458069	2.102	0.0864714	0.151207	8.98607	1.42714	9.31558e-61	2.71579	5.11781e-139
P98086	C1qa	Complement C1q subcomponent subunit A	C1QA_MOUSE	0	1.65147	1.65784	6.45168	6.27016	5.65653	9.38741	8.52558	NotSig	inf	0.0596243	0.0966099	NotSig	2.55416	0.162602	0.28362	Enrich	4.80181	0.0179189	0.0301148	Enrich	2.03554	0.00180235	0.0162907	1.32724	0.237803	0.326007	1.3515	-5.74428	0.00623501	-7.74595	2.18551e-11
P98191	Cds1	Phosphatidate cytidylyltransferase 1	CDS1_MOUSE	0	0	0	0	4.76578	0	4.516	4.46349	Enrich	inf	6.41128e-05	0.000407183	NotSig				Enrich	inf	8.87716e-05	0.000582805	NotSig	inf	0.0223975	0.0575823	-0.256071	0.286346	0.378222	5.96849	1.01612	3.23641e-05	0.936808	1.10742e-08
P98200	Atp8a2	Phospholipid-transporting ATPase IB	AT8A2_MOUSE	0	0	0	0	4.78462	2.00051	3.54168	1.82127	Enrich	inf	0.000119428	0.000601523	NotSig	inf	0.181761	0.288495	Enrich	inf	0.000119828	0.000599543	NotSig	inf	0.5	0.580066	-1.33189	0.00195944	0.0121427	3.23729	2.37291	0.111523	-0.130193	0.390612
P98203;P98203-2;P98203-4;P98203-5	Arvcf	Armadillo repeat protein deleted in velo-cardio-facial syndrome homolog;Isoform 2 of Armadillo repeat protein deleted in velo-cardio-facial syndrome homolog;Isoform 4 of Armadillo repeat protein deleted in velo-cardio-facial syndrome homolog;Isoform 5 of Armadillo repeat protein deleted in velo-cardio-facial syndrome homolog	ARVC_MOUSE	10.5274	9.87318	13.015	9.70251	10.1918	10.5504	8.46021	8.79997	NotSig	-0.460133	0.732338	0.772212	NotSig	-0.148011	0.51787	0.57088	Deplete	-5.41822	0.0233406	0.0373059	NotSig	-0.715507	0.586708	0.659959	-1.61716	0.112875	0.184345	5.26412	0.354531	0.00715367	0.915674	2.14595e-05
P99024	Tubb5	Tubulin beta-5 chain	TBB5_MOUSE	5.40014	6.18919	6.42249	6.23348	11.4416	10.0968	10.3043	10.0998	Enrich	5.80891	0.00108973	0.00341606	Enrich	3.74284	0.00168761	0.0100202	Enrich	3.87747	4.46783e-05	0.000569659	Enrich	3.85252	0.00161361	0.0155731	-1.08496	0.0159511	0.0467233	8.92948	1.13477	2.63213e-39	0.418887	7.15746e-20
P99026	Psmb4	Proteasome subunit beta type-4	PSB4_MOUSE	5.1212	3.96574	5.79259	5.56627	5.82011	5.49026	5.02005	5.66357	NotSig	0.627001	0.123317	0.177457	NotSig	0.499298	0.349562	0.454376	NotSig	-0.832353	0.0544771	0.0773353	NotSig	-0.0310111	0.832245	0.8672	-0.805935	0.0113262	0.0374179	6.9784	-1.01493	0.0161601	-1.15313	1.87001e-13
P99027	Rplp2	60S acidic ribosomal protein P2	RLA2_MOUSE	1.35604	3.56824	6.77491	4.42232	4.99646	8.05382	5.07808	3.48987	NotSig	1.75319	0.0689115	0.105929	NotSig	1.27573	0.131746	0.241853	Deplete	-1.61897	0.0153679	0.0264966	NotSig	-1.35187	0.22618	0.316158	0.0219345	0.898556	0.918553	5.98588	-3.18533	6.34788e-46	-1.95971	3.25635e-36
P99029;P99029-2	Prdx5	Peroxiredoxin-5, mitochondrial;Isoform Cytoplasmic+peroxisomal of Peroxiredoxin-5, mitochondrial	PRDX5_MOUSE	5.77384	6.03611	5.0877	6.03812	5.87233	6.17832	8.33826	8.05789	NotSig	-0.1106	0.868755	0.892445	NotSig	-0.139347	0.808253	0.840811	Enrich	3.19124	0.000979556	0.0025097	Enrich	2.02299	0.000178243	0.0113696	2.48093	9.0915e-05	0.00285513	7.43112	0.16304	0.000114065	-0.652262	0.000587975
Q00493	Cpe	Carboxypeptidase E	CBPE_MOUSE	2.14972	1.89449	1.95125	6.91881	4.88615	3.31376	4.30281	6.1314	NotSig	1.56727	0.116393	0.168552	NotSig	1.22186	0.413838	0.474282	NotSig	3.1062	0.202015	0.238806	NotSig	-0.660189	0.488858	0.580066	1.03765	0.66061	0.72062	8.42838	-1.62521	0.692014	-1.91447	2.39239e-40
Q00612	G6pdx	Glucose-6-phosphate 1-dehydrogenase X	G6PD1_MOUSE	2.17643	0	0.840451	3.56271	7.28314	5.32079	6.83808	6.60385	Enrich	4.97335	0.00393531	0.0100671	Enrich	inf	0.00036434	0.0042289	Enrich	5.66307	0.00393033	0.00844654	NotSig	1.23688	0.129014	0.194769	-0.482403	0.274884	0.365922	4.07247	-0.8859	0.436611	-0.964134	0.236635
Q00977	Gjb2	Gap junction beta-2 protein	CXB2_MOUSE	0.774177	0.649631	0	0	0	0	1.08091	2.06677	NotSig	#NAME?	0.391002	0.443422	NotSig	#NAME?	0.391002	0.454376	NotSig	inf	0.391002	0.422677	NotSig	inf	0.5	0.580066	inf	0.391002	0.469332	0.820687	-1.72598	0.248057	-1.5314	0.493113
Q01063;Q01063-2	Pde4d	cAMP-specific 3',5'-cyclic phosphodiesterase 4D;Isoform 9 of cAMP-specific 3',5'-cyclic phosphodiesterase 4D	PDE4D_MOUSE	0	0	0	0.465224	4.39284	4.63078	6.59712	6.2763	Enrich	inf	0.00050301	0.00181057	Enrich	inf	0.00178034	0.0104081	Enrich	inf	0.000102693	0.000590983	Enrich	6.86322	0.000898306	0.0134316	2.23867	0.000911426	0.00797915	5.59421	0.469074	0.000110186	1.03004	7.85331e-06
Q01065	Pde1b	Calcium/calmodulin-dependent 3',5'-cyclic nucleotide phosphodiesterase 1B	PDE1B_MOUSE	4.18531	4.4993	5.44369	4.18194	6.87411	5.70642	7.57566	6.4734	Enrich	2.65268	0.0023744	0.00655581	NotSig	1.33468	0.0435059	0.124839	Enrich	2.04112	0.00811418	0.0156102	Enrich	2.31868	0.00047942	0.0120326	0.730323	0.0210743	0.0571793	6.36747	1.22323	2.71365e-09	-2.73214	5.00211e-115
Q01097	Grin2b	Glutamate receptor ionotropic, NMDA 2B	NMDE2_MOUSE	0	0	0	4.12276	6.2805	2.34505	4.74939	4.91538	Enrich	inf	6.33416e-05	0.000405092	NotSig	inf	0.182417	0.288495	Enrich	inf	0.000154066	0.000654021	NotSig	0.832118	0.112168	0.172295	-1.56438	0.00141793	0.0103103	8.16267	2.33588	1.27165e-52	-0.429273	0.00683423
Q01149	Col1a2	Collagen alpha-2(I) chain	CO1A2_MOUSE	4.87191	5.66539	6.64122	5.21541	5.01839	8.13644	5.09766	4.28851	NotSig	-0.0879814	0.852291	0.879475	NotSig	1.40321	0.0833959	0.171831	NotSig	-1.71507	0.103965	0.133508	NotSig	-1.80873	0.577289	0.651449	0.146744	0.90474	0.922918	1.88434	-6.23756	6.14741e-10	-4.07334	0.188124
Q01405	Sec23a	Protein transport protein Sec23A	SC23A_MOUSE	0	0	0	0	6.11033	4.32451	5.90158	5.24207	Enrich	inf	5.04169e-05	0.000367763	Enrich	inf	0.00243855	0.0130514	Enrich	inf	0.000107132	0.000590983	NotSig	inf	0.0344295	0.0715309	-0.197572	0.480641	0.554395	6.25446	1.0875	1.33276e-06	0.431885	0.000158382
Q01768	Nme2	Nucleoside diphosphate kinase B	NDKB_MOUSE	4.68331	5.53406	4.71294	4.77636	7.21715	6.53179	7.70965	7.80404	NotSig	2.06023	0.0423307	0.0751365	Enrich	1.00351	0.00523776	0.0238979	Enrich	2.9341	0.00200229	0.00466281	Enrich	2.96859	0.00216183	0.0176902	0.440377	0.137471	0.215865	0.821928	#NAME?	0.0329594	10.8847	0.135034
Q01853	Vcp	Transitional endoplasmic reticulum ATPase	TERA_MOUSE	4.4868	4.42075	4.47449	5.18957	10.9122	9.13475	11.1213	9.89743	Enrich	6.39153	0.000135432	0.000656858	Enrich	4.79566	5.87084e-05	0.00270019	Enrich	6.53561	0.000136568	0.000623905	Enrich	4.6062	0.000439265	0.0117504	0.265686	0.499972	0.572131	8.72485	0.245786	2.06483e-11	0.786485	1.39906e-30
Q02053	Uba1	Ubiquitin-like modifier-activating enzyme 1	UBA1_MOUSE	4.61056	4.56526	4.31769	4.65933	8.11579	6.58553	8.35353	8.38867	Enrich	3.48576	0.000449006	0.00165944	Enrich	2.10516	0.00591334	0.0261287	Enrich	4.04883	7.95958e-05	0.000569659	Enrich	3.75591	0.00358247	0.0222674	0.257534	0.373994	0.465321	6.8703	0.020881	0.028306	-0.143567	0.56974
Q02105	C1qc	Complement C1q subcomponent subunit C	C1QC_MOUSE	1.27071	2.34826	2.27195	8.40957	5.09242	4.84044	4.23144	8.32717	NotSig	2.76714	0.0518314	0.089985	NotSig	1.0314	0.168631	0.288495	NotSig	0.763266	0.233474	0.272513	NotSig	-0.17351	0.799378	0.83814	-1.55878	0.390518	0.469332	1.25172	-7.15763	0.000538986	-8.35525	2.1942e-13
Q02248	Ctnnb1	Catenin beta-1	CTNB1_MOUSE	8.89304	7.92245	9.69726	8.0687	10.1086	8.59031	9.84418	9.21571	NotSig	0.904319	0.11798	0.170581	NotSig	0.120483	0.454239	0.51285	NotSig	0.0293824	0.75259	0.772792	NotSig	0.915376	0.112444	0.172532	-0.256338	0.416478	0.492356	7.14591	-0.883398	0.840524	-0.763881	7.8533e-05
Q02357-6	Ank1	Isoform 6 of Ankyrin-1	ANK1_MOUSE	9.7838	10.3617	9.15557	7.99786	9.37724	8.62259	7.71603	7.40606	NotSig	-0.517076	0.340997	0.419571	Deplete	-1.77323	0.0125646	0.0478139	NotSig	-1.71263	0.0717956	0.096705	NotSig	-0.785256	0.294809	0.398226	-1.61621	0.00376915	0.0184567	6.10476	1.58471	3.60262e-10	4.62692	2.61454e-37
Q02566	Myh6	Myosin-6	MYH6_MOUSE	0	3.81085	4.05946	2.74786	5.06469	5.88486	5.45554	7.09621	Enrich	inf	0.00594207	0.0143232	NotSig	1.06946	0.236327	0.339027	NotSig	1.72192	0.150363	0.184435	NotSig	2.527	0.0705685	0.117378	0.316997	0.715326	0.769574	0			#NAME?	0.390612
Q02819	Nucb1	Nucleobindin-1	NUCB1_MOUSE	1.72625	0.712838	1.81797	6.0498	1.28692	4.28052	2.22504	5.83273	NotSig	-1.04278	0.740339	0.779606	Enrich	3.61729	0.0117265	0.0450757	NotSig	0.159533	0.780244	0.798616	NotSig	-0.337931	0.591522	0.665107	1.36925	0.457412	0.5312	5.15918	-0.789989	0.567841	0.232442	0.0161005
Q03137;Q03137-2	Epha4	Ephrin type-A receptor 4;Isoform Short of Ephrin type-A receptor 4	EPHA4_MOUSE	0	0	0	3.89247	4.95961	0.964891	5.40552	5.68177	Enrich	inf	0.00099095	0.00318354	NotSig	inf	0.391002	0.454376	Enrich	inf	6.81227e-05	0.000569659	NotSig	1.78272	0.0190579	0.0538618	0.312803	0.344901	0.436634	8.0358	1.3996	1.60451e-34	-0.379418	0.000174381
Q03141;Q03141-2;Q03141-3	Mark3	MAP/microtubule affinity-regulating kinase 3;Isoform 2 of MAP/microtubule affinity-regulating kinase 3;Isoform 3 of MAP/microtubule affinity-regulating kinase 3	MARK3_MOUSE	0	0	0	0	5.99118	5.71343	6.59899	5.85256	Enrich	inf	2.31483e-07	8.68204e-05	Enrich	inf	0.000116145	0.00288734	Enrich	inf	8.53987e-05	0.00057713	NotSig	inf	0.0212968	0.0562644	0.663799	0.0714795	0.13303	5.85127	-0.878324	0.925409	-0.613113	0.140114
Q03173;Q03173-4;Q03173-5	Enah	Protein enabled homolog;Isoform 3 of Protein enabled homolog;Isoform 4 of Protein enabled homolog	ENAH_MOUSE	0	0	0	0	5.45362	4.00709	6.63264	5.44642	Enrich	inf	3.80035e-06	0.000146061	Enrich	inf	0.00198976	0.0112612	Enrich	inf	0.000105314	0.000590983	NotSig	inf	0.0174668	0.0520669	1.24793	0.013153	0.0410182	7.66227	0.348453	1.32294e-08	1.68509	4.80279e-48
Q03265	Atp5f1a	ATP synthase subunit alpha, mitochondrial	ATPA_MOUSE	9.31444	9.50194	9.42107	10.4155	9.76539	9.85438	9.91183	10.8995	NotSig	0.347247	0.324072	0.401259	NotSig	0.315573	0.195375	0.293117	Enrich	0.494324	0.00480372	0.00998687	NotSig	0.427586	0.144243	0.215445	0.132149	0.419129	0.49448
Q03391	Grin2d	Glutamate receptor ionotropic, NMDA 2D	NMDE4_MOUSE	0	0	0	0	4.44098	0	0.318804	0	Enrich	inf	0.000164946	0.000757266	NotSig				NotSig	inf	0.391002	0.422677					-5.90396	0.000121574	0.00316968	5.921	2.54103	1.20212e-11	5.63597	1.38992e-34
Q03958	Pfdn6	Prefoldin subunit 6	PFD6_MOUSE	0	1.22513	0	0	5.68586	4.97722	5.11669	4.90559	Enrich	inf	0.000391883	0.00148851	NotSig	2.14119	0.0519789	0.143177	Enrich	inf	0.000396393	0.00119711	NotSig	inf	0.0580191	0.100241	-0.615004	0.236611	0.324681	5.95847	-1.0678	0.00822284	-0.755972	0.00935
Q04447	Ckb	Creatine kinase B-type	KCRB_MOUSE	7.58649	7.739	7.3295	7.95885	12.0863	10.162	11.8455	11.448	Enrich	4.43737	9.62442e-05	0.000529343	Enrich	2.52946	0.00324144	0.0162796	Enrich	4.463	9.28685e-05	0.000590983	Enrich	3.46637	0.0012045	0.0149157	-0.224455	0.419872	0.495154	9.29512	-1.67844	2.81357e-25	-1.82043	2.03118e-145
Q04690;Q04690-2	Nf1	Neurofibromin;Isoform 1 of Neurofibromin	NF1_MOUSE	0	0	0	1.16223	5.06768	4.27536	5.5372	5.34277	Enrich	inf	0.00183684	0.00530599	Enrich	inf	0.00074264	0.0059322	Enrich	inf	0.000464489	0.0013527	Enrich	4.29226	0.00574478	0.0293078	0.369994	0.456287	0.530106	6.26519	-0.233045	0.14767	1.28497	1.44024e-11
Q04736	Yes1	Tyrosine-protein kinase Yes	YES_MOUSE	0	0	0	0	0	0	6.08135	4.87247	NotSig				NotSig				Enrich	inf	0.000194311	0.000730638	NotSig	inf	0.0233771	0.0585155	inf	0.000194311	0.00407489	3.94744	-1.48846	0.439933	-0.96504	0.63713
Q05186	Rcn1	Reticulocalbin-1	RCN1_MOUSE	0	0	1.77425	7.40937	4.35189	3.37985	4.01971	7.1879	NotSig	inf	0.0642569	0.100287	NotSig	inf	0.0592708	0.145715	NotSig	1.72367	0.123206	0.15517	NotSig	-0.29489	0.463486	0.57387	-1.31975	0.8472	0.877522	3.24985	-0.738702	0.573034	-3.35603	4.89098e-36
Q05512;Q05512-2;Q05512-3;Q05512-4	Mark2	Serine/threonine-protein kinase MARK2;Isoform 2 of Serine/threonine-protein kinase MARK2;Isoform 3 of Serine/threonine-protein kinase MARK2;Isoform 4 of Serine/threonine-protein kinase MARK2	MARK2_MOUSE	0	0	0	0	1.75391	1.47127	3.61951	3.41779	NotSig	inf	0.182277	0.245991	NotSig	inf	0.188822	0.289005	Enrich	inf	0.000195195	0.000732046	NotSig	inf	0.0426001	0.0809113	1.14244	0.162519	0.246762	6.39401	0.936307	3.31473e-06	0.680512	0.00595545
Q05769	Ptgs2	Prostaglandin G/H synthase 2	PGH2_MOUSE	0	2.05724	4.81808	5.72167	0	3.41468	3.88113	5.88371	NotSig				NotSig	1.01905	0.451662	0.510374	NotSig	-0.835612	0.198456	0.235472	NotSig	0.0967257	0.620402	0.689581	inf	0.00430862	0.0200791	3.31722	9.62964	0.00164846	4.15923	0.001004
Q05793	Hspg2	Basement membrane-specific heparan sulfate proteoglycan core protein	PGBM_MOUSE	0.918739	0	0	0	0	0	0	0	NotSig	#NAME?	0.391002	0.443422	NotSig				NotSig											1.38134	-4.21037	0.000112632	-1.40768	0.763905
Q05915	Gch1	GTP cyclohydrolase 1	GCH1_MOUSE	0	0	0	0	1.57117	0	5.72326	5.49588	NotSig	inf	0.183262	0.245991	NotSig				Enrich	inf	0.000302397	0.000982534	NotSig	inf	0.0178252	0.0523628	3.7901	0.0152551	0.0450951	6.81999	3.13793	1.3036e-28	4.59002	2.52298e-61
Q05920	Pc	Pyruvate carboxylase, mitochondrial	PYC_MOUSE	15.8845	16.0842	15.5768	16.4765	15.3482	15.6816	14.4421	16.5255	NotSig	-0.679491	0.411388	0.463845	NotSig	-0.205488	0.603297	0.652081	NotSig	-1.19925	0.125226	0.157369	NotSig	0.00726324	0.854491	0.885031	-0.846351	0.130959	0.206876
Q06138	Cab39	Calcium-binding protein 39	CAB39_MOUSE	0	0	0	0.621248	6.40747	5.20131	6.17867	6.0554	Enrich	inf	5.30177e-06	0.000146663	Enrich	inf	0.000185668	0.00316145	Enrich	inf	4.68513e-05	0.000569659	Enrich	5.84081	0.00224689	0.0177712	-0.210822	0.292557	0.384322	6.62405	0.145031	0.00267672	-0.31267	0.0126776
Q06185	Atp5me	ATP synthase subunit e, mitochondrial	ATP5I_MOUSE	4.19166	4.02626	1.64953	7.29255	6.83611	7.15966	7.80259	7.6721	NotSig	1.44126	0.170649	0.235941	NotSig	2.71473	0.100384	0.196051	Enrich	3.50291	0.0287431	0.0446475	NotSig	0.381181	0.306937	0.412429	1.18221	0.147575	0.227469
Q06318	Scgb1a1	Uteroglobin	UTER_MOUSE	5.28998	7.90077	8.81869	6.34291	5.61692	10.6296	6.88889	5.86064	NotSig	0.35672	0.244304	0.311612	NotSig	0.804536	0.157758	0.278459	NotSig	-2.01203	0.0617079	0.0852382	NotSig	-0.571545	0.274496	0.374567	1.49711	0.0993082	0.167384
Q06890	Clu	Clusterin	CLUS_MOUSE	0	0	0	5.58639	2.56205	2.90269	1.45657	3.98438	NotSig	inf	0.0818635	0.122931	Enrich	inf	0.00107487	0.0075241	NotSig	inf	0.391002	0.422677	NotSig	-1.58789	0.215248	0.303914	0.520562	0.556703	0.626399	7.91512	-2.1728	0.0324012	-2.7866	0.940262
Q07076	Anxa7	Annexin A7	ANXA7_MOUSE	4.98932	3.26563	5.38209	5.01343	8.92972	8.69406	11.2659	10.1802	Enrich	3.95583	1.3301e-05	0.000196622	NotSig	4.63905	0.0173417	0.0618348	Enrich	5.81243	3.54258e-05	0.000569659	Enrich	5.05254	0.000294947	0.0113696	2.37383	0.000537994	0.00632908	6.32316	0.603003	4.70448e-07	0.534193	1.16393e-06
Q07113	Igf2r	Cation-independent mannose-6-phosphate receptor	MPRI_MOUSE	0.694692	0.741837	2.87557	0	1.94286	1.16275	0.652264	0	NotSig	2.23542	0.387673	0.443422	NotSig	1.82242	0.772306	0.806887	NotSig	-5.86263	0.341944	0.387303					-2.43618	0.367332	0.46	4.75938	1.18391	0.00289684	-0.209681	0.627946
Q07797	Lgals3bp	Galectin-3-binding protein	LG3BP_MOUSE	4.43955	8.60022	4.83913	6.77464	9.49374	6.31223	6.39273	6.3626	NotSig	1.63392	0.143172	0.201599	NotSig	-2.32227	0.0453693	0.128385	NotSig	-0.430072	0.493303	0.52418	NotSig	-0.471618	0.403708	0.511181	-2.90841	0.00459304	0.0206401	2.89609	-2.69972	0.0783696	-1.54407	0.817364
Q08331	Calb2	Calretinin	CALB2_MOUSE	2.29344	2.65076	0.867499	2.55879	7.96062	7.51326	8.6862	8.04863	Enrich	5.27197	0.00678111	0.0159932	Enrich	4.68257	0.00637194	0.0276951	Enrich	7.43052	0.0015232	0.00365389	Enrich	5.31313	0.0126686	0.0451611	0.794613	0.0800248	0.142694	8.41437	1.81726	2.02118e-33	6.81557	1.73868e-101
Q08460;Q08460-2;Q08460-3;Q08460-4;Q08460-5	Kcnma1	Calcium-activated potassium channel subunit alpha-1;Isoform 2 of Calcium-activated potassium channel subunit alpha-1;Isoform 3 of Calcium-activated potassium channel subunit alpha-1;Isoform 4 of Calcium-activated potassium channel subunit alpha-1;Isoform 5 of Calcium-activated potassium channel subunit alpha-1	KCMA1_MOUSE	0	0	0	5.63654	2.71028	3.70754	6.80013	6.7203	NotSig	inf	0.181702	0.245991	NotSig	inf	0.0581619	0.145715	Enrich	inf	6.13065e-05	0.000569659	Enrich	1.08228	0.00917993	0.0380041	2.44295	0.0782263	0.140876	7.6651	2.01803	7.548e-35	1.14862	6.45114e-20
Q08509	Eps8	Epidermal growth factor receptor kinase substrate 8	EPS8_MOUSE	0	0	0	0	6.2053	4.96038	7.38088	6.55119	Enrich	inf	0.00010355	0.00055294	Enrich	inf	0.00394653	0.018949	Enrich	inf	4.54924e-05	0.000569659	Enrich	inf	0.0126653	0.0451611	1.16768	0.00823757	0.0302149	5.58323	-0.636847	0.511923	1.1048	3.83014e-15
Q0KL02;Q0KL02-3;Q0KL02-4	Trio	Triple functional domain protein;Isoform 3 of Triple functional domain protein;Isoform 4 of Triple functional domain protein	TRIO_MOUSE	1.35668	1.39678	0	1.09487	4.25129	3.758	5.22516	5.19186	NotSig	0.920121	0.119818	0.172784	NotSig	0.348992	0.191228	0.289838	Enrich	inf	0.000178366	0.000697184	Enrich	4.12383	0.00717264	0.0329989	0.927952	0.0795304	0.142236	6.04193	0.012189	0.00273566	0.152854	0.591306
Q0VBD0	Itgb8	Integrin beta-8	ITB8_MOUSE	0	0	0	0.635016	0	0.475341	0	0	NotSig				NotSig	inf	0.391002	0.454376	NotSig				NotSig	#NAME?	0.391002	0.49801				5.75525	-1.713	0.000535659	1.50788	2.62865e-10
Q0VBF8	Stum	Protein stum homolog	STUM_MOUSE	1.51555	1.72733	3.25007	5.91645	2.54519	3.74463	6.72038	6.58994	NotSig	-1.10883	0.583647	0.635403	NotSig	-0.14442	0.391485	0.454654	NotSig	2.17633	0.0898825	0.117109	NotSig	0.356911	0.63862	0.705645	4.37373	0.0108841	0.0365413
Q0VE82	Cpne7	Copine-7	CPNE7_MOUSE	0	0	0	0	6.99332	5.5952	7.10486	6.81467	Enrich	inf	2.52073e-05	0.000255793	Enrich	inf	0.000784156	0.00608121	Enrich	inf	9.08739e-05	0.00058736	Enrich	inf	0.0148929	0.048566	0.148816	0.717804	0.771666	10.0457	4.39713	1.14626e-213	9.52535	0
Q11011	Npepps	Puromycin-sensitive aminopeptidase	PSA_MOUSE	4.27	4.44534	4.68532	4.88353	6.26406	5.47911	6.64144	7.09073	Enrich	2.02729	0.000338043	0.00131488	NotSig	1.09747	0.032974	0.100586	Enrich	1.99006	0.000515558	0.00147178	Enrich	2.13003	0.00480971	0.0266144	0.40985	0.160674	0.244731	8.66724	0.512983	1.66458e-17	0.733505	2.97563e-19
Q11136	Pepd	Xaa-Pro dipeptidase	PEPD_MOUSE	3.10581	0	2.88359	2.02551	4.72112	4.05528	4.47945	5.06235	NotSig	1.00492	0.219958	0.284218	Enrich	inf	4.87761e-05	0.00270019	NotSig	0.960486	0.211217	0.248251	NotSig	1.78747	0.0875915	0.139818	-0.249555	0.166909	0.251377	3.81657	-2.51574	1.84919e-05	-1.20354	0.00351859
Q148V7-2	Relch	Isoform 2 of RAB11-binding protein RELCH	RELCH_MOUSE	0	0	0	0	4.65804	2.28652	5.5701	5.33187	Enrich	inf	0.00073654	0.00248928	NotSig	inf	0.0769387	0.161912	Enrich	inf	6.76486e-05	0.000569659	NotSig	inf	0.0257126	0.061241	0.851502	0.0607075	0.119125
Q149F3	Gspt2	Eukaryotic peptide chain release factor GTP-binding subunit ERF3B	ERF3B_MOUSE	0	1.46089	0	1.70675	4.9809	3.06689	5.75749	5.24823	Enrich	inf	0.000101642	0.000548067	NotSig	1.87231	0.293379	0.407939	Enrich	inf	0.00010004	0.000590983	Enrich	3.63419	0.0073486	0.0333456	0.804501	0.0298274	0.0717143	5.59374	2.04901	8.31401e-10	0.23978	0.0654243
Q149L6	Dnajb14	DnaJ homolog subfamily B member 14	DJB14_MOUSE	1.79608	0	0	5.29805	5.16803	3.76568	3.69397	5.38619	NotSig	2.62812	0.0479518	0.0840171	NotSig	inf	0.0593292	0.145715	Enrich	inf	0.000329234	0.00104373	NotSig	0.0230765	0.77269	0.81594	-1.51134	0.00248756	0.0141992	7.82413	0.653469	1.02949e-16	1.09078	2.28313e-25
Q14BI2	Grm2	Metabotropic glutamate receptor 2	GRM2_MOUSE	0	1.67466	1.67364	5.13596	5.10817	2.52833	6.69678	6.75262	Enrich	inf	0.000452833	0.00166705	NotSig	-0.658952	0.714432	0.756825	Enrich	4.46903	0.0128666	0.0228147	Enrich	1.62064	0.000802905	0.0133755	1.54015	0.00690205	0.0267039	3.12778	3.46184	0.0457194	1.63506	0.00870884
Q1LZI2	Slc35f3	Putative thiamine transporter SLC35F3	S35F3_MOUSE	0	1.11481	1.374	4.78073	2.60296	0	1.19438	6.34288	NotSig	inf	0.205593	0.26732	NotSig	#NAME?	0.391002	0.454376	NotSig	-0.739751	0.924679	0.93117	NotSig	0.626277	0.443045	0.551549	-2.0914	0.511726	0.583275	1.5095	-3.39867	0.0102759	-4.33019	6.68048e-26
Q2HXL6	Edem3	ER degradation-enhancing alpha-mannosidase-like protein 3	EDEM3_MOUSE	0	0	0	4.16467	0	0	1.24496	4.32716	NotSig				NotSig				NotSig	inf	0.391002	0.422677	NotSig	0.15733	0.413379	0.521314	inf	0.391002	0.469332	4.92682	-0.15277	0.0432406	0.618887	0.0204784
Q2M3X8;Q2M3X8-2;Q2M3X8-3;Q2M3X8-4;Q501J7;Q501J7-2;Q501J7-3	Phactr1;Phactr1;Phactr1;Phactr1;Phactr4;Phactr4;Phactr4	Phosphatase and actin regulator 1;Isoform 2 of Phosphatase and actin regulator 1;Isoform 3 of Phosphatase and actin regulator 1;Isoform 4 of Phosphatase and actin regulator 1;Phosphatase and actin regulator 4;Isoform 2 of Phosphatase and actin regulator 4;Isoform 3 of Phosphatase and actin regulator 4	PHAR1_MOUSE;PHAR1_MOUSE;PHAR1_MOUSE;PHAR1_MOUSE;PHAR4_MOUSE;PHAR4_MOUSE;PHAR4_MOUSE	0	0	0	0	3.59148	0.939028	3.77274	1.29326	NotSig	inf	0.058792	0.0966099	NotSig	inf	0.391002	0.454376	Enrich	inf	0.00173393	0.00410789	NotSig	inf	0.5	0.580066	-0.565908	0.893249	0.914419
Q2NL51	Gsk3a	Glycogen synthase kinase-3 alpha	GSK3A_MOUSE	0	0	0	1.83121	9.39195	9.52361	8.62348	7.70083	Enrich	inf	4.92685e-05	0.000363568	Enrich	inf	0.000260946	0.00351264	Enrich	inf	4.03833e-05	0.000569659	Enrich	5.14835	0.0113376	0.0426639	-0.792065	0.0709802	0.132486	6.45366	0.006743	0.115422	0.559848	0.0793451
Q2PFD7;Q2PFD7-2	Psd3	PH and SEC7 domain-containing protein 3;Isoform 2 of PH and SEC7 domain-containing protein 3	PSD3_MOUSE	2.83836	2.08714	1.47185	3.34454	8.69344	7.84018	7.86726	6.85172	NotSig	-0.657151	0.131103	0.186998	NotSig	1.57084	0.0690947	0.151518	Enrich	4.0454	0.0211535	0.0344348	NotSig	1.88254	0.0841123	0.135285	-0.787525	0.0290394	0.0703195	7.84597	1.67045	1.04401e-36	0.992129	1.12078e-19
Q2TBE6	Pi4k2a	Phosphatidylinositol 4-kinase type 2-alpha	P4K2A_MOUSE	0	0	0.98032	1.34368	5.89511	4.48438	5.71211	5.15662	Enrich	inf	5.0163e-06	0.000146626	Enrich	inf	0.0009365	0.00678771	Enrich	3.90669	0.0146385	0.0254842	Enrich	3.49191	0.0153165	0.0490932	-0.147545	0.47335	0.547293
Q2TPA8	Hsdl2	Hydroxysteroid dehydrogenase-like protein 2	HSDL2_MOUSE	0	0	0	0.555294	1.99543	0.739636	1.82716	2.43262	NotSig	inf	0.0637844	0.0998334	NotSig	inf	0.391002	0.454376	NotSig	inf	0.0744361	0.0996998	NotSig	2.28555	0.0381491	0.0754659	-0.187598	0.868145	0.894734	3.85586	-2.08193	0.000932629	-1.63225	0.118841
Q32M02	Fscn2	Fascin-2	FSCN2_MOUSE	9.6425	9.69237	8.01017	3.70398	9.66876	9.41197	7.50879	2.88826	NotSig	-0.0635949	0.951322	0.962522	NotSig	-0.228096	0.546505	0.598356	NotSig	-0.598906	0.371106	0.41704	NotSig	0.161325	0.8287	0.865333	-2.1233	0.00170998	0.011247	0
Q3B7Z2	Osbp	Oxysterol-binding protein 1	OSBP1_MOUSE	0	0.35846	0	0.541531	4.83187	3.53708	5.48051	5.29404	Enrich	inf	3.28874e-05	0.000294648	Enrich	4.85485	0.00167255	0.00995297	Enrich	inf	0.000149719	0.00064703	Enrich	5.45633	0.00277329	0.019989	0.704721	0.0553237	0.111728
Q3KNM2	Marchf5	E3 ubiquitin-protein ligase MARCHF5	MARH5_MOUSE	0	0	0	1.45993	4.74812	1.5064	4.45679	4.74398	Enrich	inf	0.000188921	0.000834656	NotSig	inf	0.181925	0.288495	Enrich	inf	0.000778463	0.00205277	NotSig	3.05379	0.0276572	0.0636727	-0.230245	0.476624	0.550639
Q3KQJ0	Tmem69	Transmembrane protein 69	TMM69_MOUSE	1.22969	1.09562	0	2.40696	0.573891	0.969172	2.64478	4.12038	NotSig	-2.90329	0.652768	0.698759	NotSig	-0.536643	0.933964	0.950036	NotSig	inf	0.23622	0.275382	NotSig	0.356209	0.327964	0.435633	5.65898	0.33876	0.430366	3.29905	-0.288865	0.879042	-0.300479	0.546143
Q3TBT3;Q3TBT3-2;Q3TBT3-3	Sting1	Stimulator of interferon genes protein;Isoform 2 of Stimulator of interferon genes protein;Isoform 3 of Stimulator of interferon genes protein	STING_MOUSE	1.56861	1.06522	0.879591	7.08773	0	1.08611	1.7925	6.85614	NotSig	#NAME?	0.188818	0.24904	NotSig	0.088027	0.989489	0.992099	NotSig	1.11631	0.529282	0.55807	NotSig	-0.280201	0.377492	0.489678	inf	0.184554	0.270841
Q3TCJ1	Abraxas2	BRISC complex subunit Abraxas 2	ABRX2_MOUSE	0	0	0	0.45809	5.24532	2.48614	5.77433	4.76576	Enrich	inf	6.99301e-06	0.000156348	NotSig	inf	0.0717678	0.154327	Enrich	inf	5.81139e-05	0.000569659	Enrich	5.3643	0.00138495	0.0151013	0.564366	0.0463964	0.0988742
Q3TDK6;Q3TDK6-2	Rogdi	Protein rogdi homolog;Isoform 2 of Protein rogdi homolog	ROGDI_MOUSE	5.72019	5.06013	6.69881	4.32345	6.50053	5.24012	6.70637	6.31134	NotSig	0.319353	0.334619	0.412832	NotSig	0.0739311	0.82469	0.855234	NotSig	-0.106607	0.983874	0.985248	NotSig	2.04185	0.0347289	0.0716243	0.20332	0.246856	0.336189	7.32798	1.03525	1.97244e-16	0.659395	6.49024e-12
Q3TDN2;Q3TDN2-2	Faf2	FAS-associated factor 2;Isoform 2 of FAS-associated factor 2	FAF2_MOUSE	0	0	0	0	4.39337	1.34283	5.32181	5.62234	NotSig	inf	0.0579146	0.0966099	NotSig	inf	0.391002	0.454376	Enrich	inf	0.000307332	0.000994065	Enrich	inf	0.00294523	0.0205216	-0.0620961	0.575371	0.644647	6.4215	0.525832	0.000555895	0.47426	0.0071541
Q3TDQ1	Stt3b	Dolichyl-diphosphooligosaccharide--protein glycosyltransferase subunit STT3B	STT3B_MOUSE	1.40466	1.3364	2.83505	6.62199	4.35721	5.14056	5.71812	6.74891	NotSig	0.840456	0.123897	0.178014	NotSig	1.80618	0.0646493	0.146386	NotSig	1.07712	0.176178	0.213362	NotSig	0.0741555	0.647153	0.712553	1.29048	0.0249852	0.0636048	5.68982	-0.30495	0.847451	-0.704389	0.261553
Q3TES0	Iqsec3	IQ motif and SEC7 domain-containing protein 3	IQEC3_MOUSE	7.99635	8.77054	9.12125	9.09433	7.6148	8.19359	6.30174	7.63226	NotSig	-0.456318	0.306626	0.383109	NotSig	-0.651963	0.144179	0.259482	Deplete	-2.70102	0.00394523	0.00846507	NotSig	-1.72767	0.0826416	0.133356	-1.08951	0.065777	0.125815	6.39662	1.01393	5.54997e-10	4.29438	8.69674e-46
Q3TFD2;Q3TFD2-2	Lpcat1	Lysophosphatidylcholine acyltransferase 1;Isoform 2 of Lysophosphatidylcholine acyltransferase 1	PCAT1_MOUSE	0	0	0	4.38761	6.19398	4.67658	5.78439	5.47314	Enrich	inf	4.29415e-06	0.000146061	Enrich	inf	0.00076367	0.00599222	Enrich	inf	8.5034e-05	0.000576743	NotSig	1.09174	0.0294586	0.065863	-0.385182	0.12498	0.198733	6.54881	0.156952	4.061e-08	1.20194	1.95429e-15
Q3THE2	Myl12b	Myosin regulatory light chain 12B	ML12B_MOUSE	1.35745	2.83592	5.61195	1.15751	6.33294	7.09107	5.7538	4.95532	NotSig	3.05098	0.0311351	0.0574256	NotSig	1.62263	0.0969633	0.191054	NotSig	0.189928	0.811657	0.82811	NotSig	2.34592	0.0451542	0.0840617	-0.550166	0.347416	0.439241	7.67714	-0.502312	0.249697	-0.947091	6.08476e-14
Q3THG9	Aarsd1	Alanyl-tRNA editing protein Aarsd1	AASD1_MOUSE	2.65971	1.10086	0	0	6.18096	4.28962	5.74505	5.48441	NotSig	1.88543	0.105458	0.15412	NotSig	2.2578	0.055571	0.145715	Enrich	inf	3.76478e-05	0.000569659	NotSig	inf	0.0522034	0.0921178	-0.428595	0.054143	0.110267	0.557859	-1.26396	0.730655	-0.981407	0.493113
Q3THK7	Gmps	GMP synthase [glutamine-hydrolyzing]	GUAA_MOUSE	2.33085	3.68104	0.886711	3.36072	5.93682	5.05929	6.96222	6.80991	NotSig	2.28956	0.0754424	0.114559	NotSig	0.468364	0.364516	0.454376	Enrich	5.58483	0.00460352	0.00962916	Enrich	3.57081	1.43834e-05	0.0110537	1.08508	0.0186387	0.0525223	7.43891	0.968007	1.05618e-16	1.15966	3.38609e-22
Q3THS6	Mat2a	S-adenosylmethionine synthase isoform type-2	METK2_MOUSE	0.950812	0	1.18479	1.96366	6.1908	4.45997	5.52464	5.38128	Enrich	4.48181	0.0114466	0.0246888	Enrich	inf	0.000198243	0.00316145	Enrich	2.86665	0.0324314	0.0495979	NotSig	3.17599	0.0166163	0.0507147	-0.62706	0.067831	0.128808	8.29143	-0.57989	0.319063	0.803406	2.11331e-23
Q3TIV5;Q3TIV5-2	Zc3h15	Zinc finger CCCH domain-containing protein 15;Isoform 2 of Zinc finger CCCH domain-containing protein 15	ZC3HF_MOUSE	0	0	0	0	4.5874	1.65141	1.53055	0	Enrich	inf	0.000138292	0.000668369	NotSig	inf	0.194515	0.291993	NotSig	inf	0.181721	0.219167					-2.68525	0.0378654	0.0848819	8.65086	0.460639	1.66458e-17	0.335549	1.66289e-07
Q3TJZ6	Fam98a	Protein FAM98A	FA98A_MOUSE	0	0	0	0	6.14141	4.73955	5.66843	4.90305	Enrich	inf	1.61618e-05	0.000203984	Enrich	inf	0.000285067	0.00369892	Enrich	inf	7.94829e-05	0.000569659	NotSig	inf	0.0266584	0.0623433	-0.460614	0.085648	0.15013	4.97838	-0.845059	0.0586443	0.105301	0.120995
Q3TLH4;Q3TLH4-5	Prrc2c	Protein PRRC2C;Isoform 5 of Protein PRRC2C	PRC2C_MOUSE	0	4.37735	0	0	7.61669	8.15616	5.24853	10.0924	Enrich	inf	0.00672154	0.0158799	NotSig	1.22858	0.24104	0.344528	NotSig	inf	0.0344935	0.0521647	NotSig	inf	0.0335756	0.0706444	-1.1156	0.242788	0.331585	10.0326	0.507347	7.82871e-32	1.19548	9.25848e-82
Q3TLI0	Trappc10	Trafficking protein particle complex subunit 10	TPC10_MOUSE	0	0	0	0	5.94919	3.61686	6.35278	6.14379	Enrich	inf	0.000310408	0.00123534	NotSig	inf	0.0584486	0.145715	Enrich	inf	7.11606e-05	0.000569659	NotSig	inf	0.0211814	0.0562198	0.349883	0.324454	0.416025	6.49823	0.463693	0.000965998	0.99126	7.08604e-11
Q3TMH2	Scrn3	Secernin-3	SCRN3_MOUSE	0	0	0	1.3275	6.81784	7.13319	9.30287	8.77252	Enrich	inf	4.67397e-06	0.000146061	Enrich	inf	5.94017e-06	0.00158008	Enrich	inf	2.8257e-05	0.000569659	Enrich	7.37262	0.00123048	0.0149831	2.53262	0.00048432	0.00596435	4.90925	0.563787	0.0383041	-0.215913	0.670622
Q3TMP8	Tmem38a	Trimeric intracellular cation channel type A	TM38A_MOUSE	1.2958	1.79663	0	2.60782	6.12581	4.40517	5.81887	6.73935	Enrich	3.19656	0.0261393	0.0495745	NotSig	2.63108	0.437713	0.497459	Enrich	inf	0.0026194	0.00591272	NotSig	1.77517	0.0857951	0.137379	-0.127954	0.723425	0.775692	6.91397	1.1278	2.13478e-19	0.969642	3.83388e-12
Q3TVA9;Q3TVA9-2	Ccdc136	Coiled-coil domain-containing protein 136;Isoform 2 of Coiled-coil domain-containing protein 136	CC136_MOUSE	0	0	0	0.728887	5.49905	4.15607	4.31779	4.14393	Enrich	inf	1.61776e-05	0.000203984	Enrich	inf	0.000664688	0.00557751	Enrich	inf	8.54933e-05	0.00057713	NotSig	3.35757	0.0164161	0.0504925	-1.21197	0.000884252	0.00794729	7.33895	1.74119	1.8511e-27	3.96605	8.06966e-83
Q3TVI8	Pbxip1	Pre-B-cell leukemia transcription factor-interacting protein 1	PBIP1_MOUSE	0	0	0	5.67707	1.1341	0.665454	0	5.24378	NotSig	inf	0.391002	0.443422	NotSig	inf	0.391002	0.454376	NotSig				NotSig	-0.448613	0.435226	0.544226	#NAME?	0.391002	0.469332	4.22017	-3.439	4.40639e-10	-1.82424	0.679438
Q3TXS7	Psmd1	26S proteasome non-ATPase regulatory subunit 1	PSMD1_MOUSE	6.16593	6.92752	5.89601	5.35808	5.93507	6.1477	5.56227	5.448	NotSig	-0.387869	0.630751	0.678625	NotSig	-0.722076	0.136572	0.249251	NotSig	-0.386103	0.303306	0.346411	NotSig	-0.0984661	0.843637	0.875944	-0.383641	0.0991395	0.167197	8.32659	0.411695	4.59411e-13	0.696768	4.44071e-17
Q3TXX4	Slc17a7	Vesicular glutamate transporter 1	VGLU1_MOUSE	0	5.70534	4.20404	7.20425	2.44042	5.5034	8.69193	8.94245	NotSig	inf	0.186928	0.247736	NotSig	-0.274403	0.65252	0.697629	NotSig	3.54751	0.048336	0.0693726	Enrich	1.71985	0.000734993	0.0131974	4.75408	0.0212957	0.057544	0	#NAME?	0.406022
Q3TY60-2	Fam131b	Isoform 2 of Protein FAM131B	F131B_MOUSE	0	0	0	1.48623	5.91549	4.60021	7.14237	5.98974	Enrich	inf	5.86689e-05	0.000400346	Enrich	inf	0.000129155	0.00300666	Enrich	inf	0.000123942	0.000603272	Enrich	4.19121	0.0105516	0.041138	1.27847	0.0125344	0.03995	5.32241	0.612394	0.276337	0.003753	0.390612
Q3TYD4;Q3TYD4-2	Arsg	Arylsulfatase G;Isoform 2 of Arylsulfatase G	ARSG_MOUSE	0	0	0	5.19567	0	0	0	4.97145	NotSig				NotSig				NotSig				NotSig	-0.25101	0.573576	0.64804				2.72247	-5.15704	1.3904e-31	-0.954037	1
Q3TYD6	Lmtk2	Serine/threonine-protein kinase LMTK2	LMTK2_MOUSE	0	0	0	0	4.86839	0.758957	0.0100499	1.95388	Enrich	inf	3.15073e-06	0.000144409	NotSig	inf	0.391002	0.454376	NotSig	inf	0.391002	0.422677	NotSig	inf	0.5	0.580066	-11.9667	1.63418e-06	0.000945862	5.66684	2.46631	6.96021e-10	0.983976	0.0289531
Q3TYX3	Smyd5	SET and MYND domain-containing protein 5	SMYD5_MOUSE	0	0	0	0	5.03938	4.68509	5.57051	4.78644	Enrich	inf	0.000170393	0.000774516	Enrich	inf	0.00044879	0.00461916	Enrich	inf	0.000105046	0.000590983	Enrich	inf	0.00419202	0.0243971	0.536199	0.122324	0.195152	5.47004	1.65549	1.83055e-06	0.919439	0.00190307
Q3U0M1;Q3U0M1-2	Trappc9	Trafficking protein particle complex subunit 9;Isoform 2 of Trafficking protein particle complex subunit 9	TPPC9_MOUSE	0	0	0	0	6.10206	3.86704	6.31959	6.09867	Enrich	inf	2.64662e-05	0.000259465	NotSig	inf	0.0578574	0.145715	Enrich	inf	0.000103303	0.000590983	NotSig	inf	0.021047	0.0559727	0.250885	0.453392	0.527166	5.89192	0.606629	2.95315e-06	0.94764	2.16433e-08
Q3U0V1	Khsrp	Far upstream element-binding protein 2	FUBP2_MOUSE	1.7085	0.99567	2.04253	0	6.11899	4.63518	3.32303	0.0221751	Enrich	3.79119	0.0190664	0.0378485	NotSig	2.72819	0.0330415	0.100663	NotSig	0.261636	0.364506	0.410427	NotSig	inf	0.5	0.580066	-2.87543	0.000619858	0.00678922	5.19333	-0.801471	0.265159	-0.683335	0.00215523
Q3U1F9	Pag1	Phosphoprotein associated with glycosphingolipid-enriched microdomains 1	PHAG1_MOUSE	0	0	0	4.66857	0.666576	2.25367	2.61618	4.85618	NotSig	inf	0.391002	0.443422	NotSig	inf	0.0600976	0.145715	Enrich	inf	0.0018529	0.00435795	NotSig	0.156683	0.398802	0.505653	2.01407	0.054568	0.110977	3.03542	-1.38501	0.326321	-1.36557	0.549436
Q3U1J4	Ddb1	DNA damage-binding protein 1	DDB1_MOUSE	3.43442	1.51538	3.1141	3.55587	6.56625	5.02631	5.95386	5.62514	Enrich	3.21585	0.000108484	0.000564107	NotSig	3.21647	0.0219492	0.0751415	NotSig	2.13159	0.0785159	0.104192	NotSig	1.84011	0.0277031	0.0637159	-0.577374	0.0683217	0.129231
Q3U2P1	Sec24a	Protein transport protein Sec24A	SC24A_MOUSE	0	0	0	0.634138	4.21439	3.84972	6.50926	5.14489	NotSig	inf	0.0713555	0.109046	NotSig	inf	0.0709412	0.153168	Enrich	inf	5.0645e-05	0.000569659	Enrich	4.8475	0.00449427	0.0255894	0.934637	0.23268	0.321266	5.03766	-0.407198	0.312309	1.42894	2.94181e-09
Q3U308	Ctu2	Cytoplasmic tRNA 2-thiolation protein 2	CTU2_MOUSE	0	0	0	0	0.783226	0.646109	3.53763	1.59097	NotSig	inf	0.391002	0.443422	NotSig	inf	0.391002	0.454376	Enrich	inf	0.000727461	0.00194509	NotSig	inf	0.5	0.580066	2.5126	0.0335749	0.0780447	3.83391	0.577735	0.783467	0.426	0.412626
Q3U3R4;Q3U3R4-2	Lmf1	Lipase maturation factor 1;Isoform 2 of Lipase maturation factor 1	LMF1_MOUSE	0	0	0	6.03684	0	0.824301	2.69896	5.59264	NotSig				NotSig	inf	0.391002	0.454376	NotSig	inf	0.252572	0.292425	NotSig	-0.502872	0.139915	0.209649	inf	0.252572	0.342523	3.50075	-2.18833	9.03994e-05	-1.43005	0.00479283
Q3U7R1;Q3U7R1-2	Esyt1	Extended synaptotagmin-1;Isoform 2 of Extended synaptotagmin-1	ESYT1_MOUSE	0	0	0.95494	0	3.8737	0	4.95091	3.12457	NotSig	inf	0.0578733	0.0966099	NotSig				NotSig	4.46981	0.0928332	0.120671	NotSig	inf	0.5	0.580066	1.46734	0.627136	0.691666	1.83405	-4.85727	0.00173985	-1.86161	0.722966
Q3UDP0	Wdr41	WD repeat-containing protein 41	WDR41_MOUSE	0	0	0	0	0	0	3.94353	3.53641	NotSig				NotSig				Enrich	inf	0.000318509	0.00101961	NotSig	inf	0.0796897	0.12926	inf	0.000318509	0.00506464	5.19931	0.840195	0.000696607	0.469781	0.0179222
Q3UEZ8	Slc10a4	Sodium/bile acid cotransporter 4	NTCP4_MOUSE	0	0	0	1.84478	4.68582	4.14352	8.51652	7.29914	NotSig	inf	0.0274717	0.0517092	Enrich	inf	5.08972e-05	0.00270019	Enrich	inf	1.62416e-05	0.000569659	Enrich	4.6574	0.0131446	0.0457861	2.24259	0.0444729	0.0959696	9.015	7.69924	2.17507e-142	7.09405	7.93806e-235
Q3UFQ8	Carmil3	Capping protein, Arp2/3 and myosin-I linker protein 3	CARL3_MOUSE	0	0	0	0	4.02628	1.67381	4.69548	4.71887	Enrich	inf	0.00190721	0.00548622	NotSig	inf	0.181778	0.288495	Enrich	inf	0.000517748	0.00147509	NotSig	inf	0.0292245	0.0655873	0.650152	0.220418	0.308159
Q3UFT3	Garem1	GRB2-associated and regulator of MAPK protein	GARE1_MOUSE	0	0	0	0	4.5841	2.29408	5.17369	4.69591	Enrich	inf	0.000720672	0.00244673	NotSig	inf	0.182963	0.288495	Enrich	inf	0.000269721	0.000902565	NotSig	inf	0.0192611	0.0539718	0.575473	0.201447	0.289563
Q3UGC7	Eif3j1	Eukaryotic translation initiation factor 3 subunit J-A	EI3JA_MOUSE	0	8.55732	1.80886	6.46888	8.72632	8.45947	8.08446	7.65495	Enrich	inf	3.58834e-05	0.00030757	NotSig	-1.14312	0.947181	0.960175	Enrich	5.56223	0.00647465	0.012873	NotSig	-0.793304	0.628393	0.696809	-0.548534	0.213628	0.300993	4.19145	-0.432092	0.646818	-0.033326	0.112707
Q3UGP8	Alg10b	Putative Dol-P-Glc:Glc(2)Man(9)GlcNAc(2)-PP-Dol alpha-1,2-glucosyltransferase	AG10B_MOUSE	0.938786	0.849522	1.03062	2.91873	2.51088	1.85142	5.03585	4.52418	NotSig	2.34309	0.403741	0.456345	NotSig	1.34541	0.492727	0.547017	Enrich	3.87564	0.0251647	0.0397344	NotSig	0.984935	0.225711	0.315819	1.92559	0.195528	0.283212	2.64437	-0.041064	0.620396	1.24728	0.250535
Q3UGR5	Hdhd2	Haloacid dehalogenase-like hydrolase domain-containing protein 2	HDHD2_MOUSE	0.816062	0.784109	0.855495	1.47273	3.3601	2.94447	5.03099	4.6765	NotSig	2.95728	0.124727	0.179019	NotSig	2.49729	0.142117	0.257164	Enrich	3.72339	0.0152795	0.026376	NotSig	2.71456	0.0365712	0.0735874	0.941094	0.239326	0.32763	5.3855	-1.40689	0.000941442	-1.4668	2.93715e-10
Q3UGY8	Arfgef3	Brefeldin A-inhibited guanine nucleotide-exchange protein 3	BIG3_MOUSE	0	0	0	0	4.76293	4.9212	4.88172	4.98552	Enrich	inf	0.000615085	0.00214112	Enrich	inf	0.000350665	0.00418282	Enrich	inf	0.000283249	0.000936222	Enrich	inf	0.0107598	0.0415518	0.0894487	0.776261	0.823195	6.11389	2.0186	7.65276e-10	1.62708	5.4636e-11
Q3UH60	Dip2b	Disco-interacting protein 2 homolog B	DIP2B_MOUSE	0	0	0	1.04464	4.6811	2.90842	5.40365	5.21486	Enrich	inf	0.000310072	0.00123534	NotSig	inf	0.0722485	0.155235	Enrich	inf	0.000136494	0.000623905	NotSig	3.08787	0.026743	0.0624062	0.728697	0.0685252	0.129531	6.89518	-0.394854	0.209662	1.56601	2.89877e-22
Q3UH66-3;Q3UH66-4;Q3UH66-5;Q3UH66-6;Q3UH66-7	Wnk2	Isoform 3 of Serine/threonine-protein kinase WNK2;Isoform 4 of Serine/threonine-protein kinase WNK2;Isoform 5 of Serine/threonine-protein kinase WNK2;Isoform 6 of Serine/threonine-protein kinase WNK2;Isoform 7 of Serine/threonine-protein kinase WNK2	WNK2_MOUSE	0	0	1.26681	3.68791	5.44749	5.37876	6.91968	6.22129	Enrich	inf	0.00012242	0.000610988	Enrich	inf	0.000387493	0.00435991	Enrich	5.67881	0.00244988	0.00557392	Enrich	2.58992	0.000968121	0.0136148	1.53168	0.00649759	0.0256886	6.13022	0.800523	3.8822e-06	1.10982	7.23074e-13
Q3UHB8	Ccdc177	Coiled-coil domain-containing protein 177	CC177_MOUSE	0	0	0	1.16147	3.79895	2.78863	5.2158	5.23735	Enrich	inf	0.000829612	0.00274117	NotSig	inf	0.0582012	0.145715	Enrich	inf	0.000201445	0.000743816	Enrich	4.20605	0.00640739	0.0306834	1.46244	0.00832403	0.0303397	4.21032	2.01876	0.00144351	1.05251	0.00489253
Q3UHC7;Q3UHC7-2;Q3UHC7-3;Q3UHC7-4	Dab2ip	Disabled homolog 2-interacting protein;Isoform 2 of Disabled homolog 2-interacting protein;Isoform 3 of Disabled homolog 2-interacting protein;Isoform 4 of Disabled homolog 2-interacting protein	DAB2P_MOUSE	0	0	1.27712	5.06997	7.04578	5.836	5.98212	5.66917	Enrich	inf	4.06639e-06	0.000146061	Enrich	inf	0.00021231	0.00329892	NotSig	2.93125	0.0330367	0.0504162	NotSig	0.589282	0.185729	0.267735	-1.04506	0.00751349	0.0283995	6.006	-0.181141	0.00439823	1.2793	5.89068e-08
Q3UHD2	Gfod1	Glucose-fructose oxidoreductase domain-containing protein 1	GFOD1_MOUSE	0	0	0	0	6.25835	2.97088	5.18144	4.36969	Enrich	inf	1.55174e-06	0.000121922	NotSig	inf	0.0667971	0.147698	Enrich	inf	8.38359e-05	0.000574046	NotSig	inf	0.0170506	0.051371	-1.07085	0.00575374	0.0239932	6.25296	1.70619	2.61988e-08	1.22134	1.11082e-09
Q3UHD6;Q3UHD6-2	Snx27	Sorting nexin-27;Isoform 2 of Sorting nexin-27	SNX27_MOUSE	2.36057	0	0.989321	3.0166	8.08042	5.89684	7.18503	6.41962	Enrich	5.11262	0.00862755	0.0196527	Enrich	inf	0.00175708	0.0103175	Enrich	5.34811	0.00702531	0.0138241	Enrich	3.54113	0.00311909	0.0210083	-0.869957	0.01304	0.0408044	7.16451	0.648262	2.87237e-07	0.504293	3.95811e-09
Q3UHD9;Q3UHD9-2	Agap2	Arf-GAP with GTPase, ANK repeat and PH domain-containing protein 2;Isoform 2 of Arf-GAP with GTPase, ANK repeat and PH domain-containing protein 2	AGAP2_MOUSE	0	0	0	0	2.88386	0.761138	3.37381	3.80631	NotSig	inf	0.0591468	0.0966099	NotSig	inf	0.391002	0.454376	Enrich	inf	0.000645408	0.00175681	NotSig	inf	0.0518204	0.09173	-0.0699516	0.653879	0.715202	6.92372	2.2563	1.73095e-19	-0.646174	9.93168e-06
Q3UHH2	Slc22a23	Solute carrier family 22 member 23	S22AN_MOUSE	0	0	0	2.3822	1.57043	0.775993	5.41289	5.12403	NotSig	inf	0.181979	0.245991	NotSig	inf	0.391002	0.454376	Enrich	inf	0.000110518	0.000597769	NotSig	2.42331	0.0442261	0.0831013	3.45021	0.0214225	0.0577789	5.14877	-0.417647	0.761806	-0.404914	0.25726
Q3UHI4	Tmed8	Protein TMED8	TMED8_MOUSE	0	0	0	0	4.60176	2.52642	5.1809	4.82231	Enrich	inf	7.21561e-05	0.000443913	NotSig	inf	0.0613071	0.145715	Enrich	inf	0.00014621	0.000641284	NotSig	inf	0.0164843	0.0504925	0.620619	0.0699404	0.131317	5.30505	1.81653	4.67973e-09	1.48944	1.29181e-07
Q3UHJ0	Aak1	AP2-associated protein kinase 1	AAK1_MOUSE	5.60464	4.99328	5.21613	6.88328	7.32025	7.40676	8.48435	8.92569	NotSig	0.342565	0.252031	0.320576	Enrich	2.43397	0.00792161	0.0327197	Enrich	2.82141	0.014903	0.0258662	NotSig	1.55278	0.109597	0.168809	1.11467	0.0197877	0.0548521	6.69961	1.12574	2.13257e-13	1.00881	3.1116e-07
Q3UHK1	Slc2a13	Proton myo-inositol cotransporter	MYCT_MOUSE	0	0	0	2.78807	5.32821	1.17686	5.4735	5.75618	Enrich	inf	0.000363341	0.00139747	NotSig	inf	0.391002	0.454376	Enrich	inf	0.000154221	0.000654021	NotSig	2.4776	0.0512645	0.0912278	0.104685	0.709083	0.763737	6.48194	2.20867	5.45905e-17	0.421573	0.109955
Q3UHL1	Camkv	CaM kinase-like vesicle-associated protein	CAMKV_MOUSE	3.14605	4.33354	5.35667	6.01023	7.32967	5.65189	6.81108	6.86916	Enrich	3.93861	0.00564219	0.0136826	NotSig	1.58175	0.0758865	0.16046	Enrich	1.38198	0.0271209	0.0424494	NotSig	0.859758	0.105522	0.163428	-0.483065	0.104823	0.174079	6.38816	1.94676	5.10003e-14	-1.86783	3.30385e-58
Q3UHX2	Pdap1	28 kDa heat- and acid-stable phosphoprotein	HAP28_MOUSE	3.3325	2.36527	4.64412	2.09342	6.19917	5.87295	7.00908	6.07327	NotSig	2.11545	0.0883739	0.131723	NotSig	2.01207	0.0861355	0.175706	Enrich	2.3627	0.00236427	0.00539625	NotSig	2.9065	0.0457473	0.0846691	0.842717	0.0551077	0.111448	8.67881	-0.411727	0.257891	-0.48721	0.000728055
Q3UIU2	Ndufb6	NADH dehydrogenase [ubiquinone] 1 beta subcomplex subunit 6	NDUB6_MOUSE	0	0	0	1.43831	0	0.951712	3.63782	5.81654	NotSig				NotSig	inf	0.391002	0.454376	NotSig	inf	0.0795717	0.1053	NotSig	2.09917	0.0528125	0.0929011	inf	0.0795717	0.142236	5.86312	-1.40778	3.44383e-05	-2.07166	1.68331e-41
Q3UJ81	Cnep1r1	Nuclear envelope phosphatase-regulatory subunit 1	NEPR1_MOUSE	0	0	0	0	0	0	1.01607	0	NotSig				NotSig				NotSig	inf	0.391002	0.422677					inf	0.391002	0.469332	5.03514	-0.438601	0.876817	-0.579341	0.210154
Q3UJD6;Q3UJD6-2	Usp19	Ubiquitin carboxyl-terminal hydrolase 19;Isoform 2 of Ubiquitin carboxyl-terminal hydrolase 19	UBP19_MOUSE	0	0	0	0	3.18956	0.850211	3.50437	3.53407	NotSig	inf	0.0584558	0.0966099	NotSig	inf	0.391002	0.454376	Enrich	inf	0.000665556	0.0018031	NotSig	inf	0.0957325	0.15059	-0.343666	0.790902	0.835659	5.53889	-0.360873	0.189794	-0.171686	0.718853
Q3UJP5	Unknown	Protein C8orf37 homolog	CH037_MOUSE	0	0	0	0	1.72034	0.822984	5.81688	4.80276	NotSig	inf	0.185029	0.246554	NotSig	inf	0.391002	0.454376	Enrich	inf	0.000131517	0.000615553	Enrich	inf	0.00789406	0.0345104	3.4918	0.0236317	0.0611174
Q3UJU9	Rmdn3	Regulator of microtubule dynamics protein 3	RMD3_MOUSE	0	0	0	3.85825	6.16915	4.3858	6.52815	6.12484	Enrich	inf	3.96379e-06	0.000146061	Enrich	inf	0.0013337	0.00862359	Enrich	inf	0.000126414	0.000605912	Enrich	2.31803	0.00287437	0.0204056	0.417054	0.252936	0.342855	4.86786	-0.849202	0.202963	-0.269304	0.369698
Q3UKC1	Tax1bp1	Tax1-binding protein 1 homolog	TAXB1_MOUSE	0	0	0	0	5.23544	3.66117	6.49435	5.88179	Enrich	inf	1.78965e-05	0.000215098	NotSig	inf	0.0582647	0.145715	Enrich	inf	2.25774e-05	0.000569659	NotSig	inf	0.0232922	0.0585155	1.28952	0.000532244	0.00631277	8.64213	-0.397957	0.241801	-0.684045	0.00249001
Q3ULJ0;Q3ULJ0-2	Gpd1l	Glycerol-3-phosphate dehydrogenase 1-like protein;Isoform 2 of Glycerol-3-phosphate dehydrogenase 1-like protein	GPD1L_MOUSE	2.32843	3.57627	1.09221	3.89035	4.97505	4.99636	6.14125	5.44967	NotSig	1.16669	0.149894	0.209883	NotSig	0.669918	0.331162	0.449894	Enrich	3.93215	0.015463	0.0266138	Enrich	1.58744	0.00274537	0.0198742	1.28208	0.0238887	0.0615619	5.32205	0.491135	3.07129e-06	0.433563	0.0110998
Q3UM45	Ppp1r7	Protein phosphatase 1 regulatory subunit 7	PP1R7_MOUSE	1.76301	0.756327	0.900562	2.15026	5.98434	5.05199	7.38115	6.36778	Enrich	3.59359	0.0239134	0.046084	Enrich	4.2523	0.00690552	0.0296269	Enrich	5.95114	0.00384177	0.00828101	Enrich	3.85272	0.01325	0.0458069	1.43967	0.00478887	0.0213544	6.1566	-0.110181	0.214895	-2.37328	4.04206e-76
Q3UMB5	Smcr8	Guanine nucleotide exchange protein SMCR8	SMCR8_MOUSE	3.52356	3.4916	3.38453	5.41994	6.5689	6.37425	7.54726	7.80847	NotSig	0.604383	0.231594	0.296916	NotSig	0.396811	0.248669	0.353725	NotSig	1.8172	0.122487	0.154401	NotSig	0.953797	0.280035	0.3812	0.934311	0.0445248	0.0959696	5.02439	0.475982	0.0543847	0.65952	0.000197151
Q3UMR5	Mcu	Calcium uniporter protein, mitochondrial	MCU_MOUSE	3.17174	0	1.22932	5.46331	5.58554	5.59702	5.49872	6.0621	NotSig	0.53003	0.284226	0.357885	Enrich	inf	0.000136876	0.00300666	NotSig	2.60247	0.0400346	0.0591752	NotSig	0.514851	0.184111	0.266085	-0.401916	0.886329	0.908299	4.80518	0.225569	0.0582764	-0.122187	0.0437453
Q3UMT1	Ppp1r12c	Protein phosphatase 1 regulatory subunit 12C	PP12C_MOUSE	0	0	0	0	2.17891	0	3.61948	3.0453	NotSig	inf	0.0615668	0.0977959	NotSig				Enrich	inf	0.000516609	0.00147331	NotSig	inf	0.0476611	0.0873372	1.22023	0.147611	0.227469	6.26277	-0.078819	0.0340601	-0.387961	0.0756135
Q3UN02	Lclat1	Lysocardiolipin acyltransferase 1	LCLT1_MOUSE	1.08647	0.913408	0.774937	1.07259	1.67508	2.21005	5.604	6.55207	NotSig	-0.0714852	0.699945	0.743472	NotSig	1.86094	0.445265	0.504646	Enrich	4.80396	0.00405496	0.00866245	Enrich	4.40484	0.0104397	0.0410455	3.52312	0.0207049	0.0566192	4.66137	0.623069	0.00294295	0.535106	0.149118
Q3UNH4	Gprin1	G protein-regulated inducer of neurite outgrowth 1	GRIN1_MOUSE	0	0	0	4.11649	7.8991	4.97401	5.6219	5.57013	Enrich	inf	8.89704e-06	0.000166588	Enrich	inf	0.00287869	0.0147825	Enrich	inf	0.000243352	0.000836998	NotSig	1.37024	0.0247977	0.0601301	-2.24815	0.00124478	0.00964331	5.26576	1.76952	1.03754e-07	1.20619	2.13704e-06
Q3UNZ8	Cryzl2	Quinone oxidoreductase-like protein 2	QORL2_MOUSE	0.890911	0.814159	0	0.6745	0	1.76489	2.68041	2.74045	NotSig	#NAME?	0.391002	0.443422	NotSig	1.31473	0.495497	0.549863	NotSig	inf	0.0882987	0.115675	NotSig	2.31724	0.173552	0.253317	inf	0.0882987	0.153845
Q3UPH1	Prrc1	Protein PRRC1	PRRC1_MOUSE	0	0	0.569346	0	2.66052	0.459346	5.67029	4.76909	NotSig	inf	0.0625966	0.0985914	NotSig	inf	0.391002	0.454376	Enrich	5.76972	0.000905717	0.00234099	NotSig	inf	0.0443088	0.0831456	2.62024	0.0412457	0.0905652
Q3UPL0	Sec31a	Protein transport protein Sec31A	SC31A_MOUSE	2.224	3.09983	1.71302	3.59299	6.5863	4.86654	6.88225	5.77354	NotSig	2.65344	0.0512259	0.0890463	NotSig	-0.380583	0.402102	0.464031	NotSig	2.07034	0.0558561	0.0790192	NotSig	-0.440667	0.371913	0.484677	0.316416	0.279549	0.370938	5.46242	0.047289	0.0421514	-0.448595	0.354636
Q3UQ44	Iqgap2	Ras GTPase-activating-like protein IQGAP2	IQGA2_MOUSE	0	0	0	0	4.09397	0	0	0	Enrich	inf	0.00106784	0.00336761	NotSig				NotSig								#NAME?	0.00106784	0.00880108
Q3UR32	P2rx3	P2X purinoceptor 3	P2RX3_MOUSE	8.23727	6.94866	8.86774	7.68292	8.56249	6.94252	6.13423	7.49094	NotSig	0.157637	0.599059	0.649611	NotSig	-0.194749	0.99253	0.994231	NotSig	-2.2132	0.0459507	0.0665485	NotSig	-0.407143	0.771932	0.815445	-1.86558	0.0652302	0.125244	0
Q3USB7	Plcl1	Inactive phospholipase C-like protein 1	PLCL1_MOUSE	0	0	0.808186	0	4.06894	1.51004	3.68292	3.04278	Enrich	inf	2.6677e-05	0.000259465	NotSig	inf	0.201113	0.298028	Enrich	2.57236	0.0317694	0.0487675	NotSig	inf	0.13057	0.196905	-0.346747	0.264747	0.356196	4.59433	-2.46759	3.93875e-18	0.11493	0.0945574
Q3UTH8;Q3UTH8-2;Q3UTH8-3;Q3UTH8-4	Arhgef9	Rho guanine nucleotide exchange factor 9;Isoform 2 of Rho guanine nucleotide exchange factor 9;Isoform 3 of Rho guanine nucleotide exchange factor 9;Isoform 4 of Rho guanine nucleotide exchange factor 9	ARHG9_MOUSE	0	0	0	0	7.0123	3.8313	5.49818	4.38943	Enrich	inf	1.23642e-06	0.000119462	NotSig	inf	0.0641423	0.146328	Enrich	inf	0.000151835	0.000650296	NotSig	inf	0.0714636	0.118516	-1.48868	0.00503397	0.022174	7.99216	1.77071	2.61811e-36	-0.902071	2.49894e-20
Q3UTZ3	MAP11	Microtubule-associated protein 11	MA11_MOUSE	0	0	0	0	5.80876	2.31424	5.63546	5.52916	Enrich	inf	0.000343836	0.00133364	NotSig	inf	0.185113	0.288495	Enrich	inf	4.02758e-05	0.000569659	Enrich	inf	0.00540118	0.0281683	-0.254215	0.642174	0.705027
Q3UU96;Q3UU96-2	Cdc42bpa	Serine/threonine-protein kinase MRCK alpha;Isoform 2 of Serine/threonine-protein kinase MRCK alpha	MRCKA_MOUSE	0	0	2.25689	0	4.45875	1.10629	4.15547	4.25638	Enrich	inf	0.00109066	0.00341606	NotSig	inf	0.391002	0.454376	NotSig	-2.89762	0.462861	0.494396	NotSig	inf	0.0325721	0.0695897	-0.388286	0.501165	0.573043	7.92949	-0.24355	0.00101786	0.63988	1.06335e-11
Q3UUF8	Ankrd34b	Ankyrin repeat domain-containing protein 34B	AN34B_MOUSE	0	0	0	0	8.17015	6.90196	8.16896	7.04659	Enrich	inf	1.53651e-06	0.000121922	Enrich	inf	0.00014083	0.00300666	Enrich	inf	5.05833e-05	0.000569659	NotSig	inf	0.0250985	0.0604557	0.0442084	0.996361	0.997395	8.40006	3.65898	5.60939e-79	3.99201	5.82221e-128
Q3UUG6;Q3UUG6-2	Tbc1d24	TBC1 domain family member 24;Isoform 2 of TBC1 domain family member 24	TBC24_MOUSE	0	0	0	2.02929	2.81482	0.904467	5.62419	5.98933	NotSig	inf	0.0606132	0.097039	NotSig	inf	0.391002	0.454376	Enrich	inf	0.000193578	0.000729795	Enrich	3.77432	0.0124807	0.0449163	2.38092	0.0566807	0.113676	7.26378	1.37982	1.8387e-19	2.06176	5.68028e-41
Q3UUQ7	Pgap1	GPI inositol-deacylase	PGAP1_MOUSE	1.46527	0.966165	0.950055	6.30459	4.856	2.23209	3.74684	6.42709	NotSig	2.94187	0.0290883	0.0542692	NotSig	1.75318	0.46878	0.526364	NotSig	1.97472	0.0581314	0.0815943	NotSig	0.0637671	0.673963	0.734022	-1.1761	0.00449795	0.0205942	7.0287	1.72886	4.28925e-26	2.46391	9.36652e-43
Q3UVL4	Vps51	Vacuolar protein sorting-associated protein 51 homolog	VPS51_MOUSE	0	1.55493	1.82112	3.95606	5.72953	4.77364	6.66098	6.32749	Enrich	inf	6.75185e-06	0.00015473	NotSig	2.70478	0.0368077	0.109763	Enrich	4.15046	0.0178246	0.0299758	Enrich	2.39301	0.00272103	0.0198671	0.97107	0.00788562	0.0295609	2.81556	0.847779	0.371497	0.756738	0.328892
Q3UVX5	Grm5	Metabotropic glutamate receptor 5	GRM5_MOUSE	0	0	1.65414	4.45988	5.51083	2.36709	5.64804	5.578	Enrich	inf	5.00382e-05	0.000366311	NotSig	inf	0.184721	0.288495	Enrich	3.5181	0.0214973	0.0349042	NotSig	1.14812	0.0411829	0.079237	0.178381	0.660096	0.72033	8.30892	0.873977	4.05425e-24	-1.16834	1.384e-32
Q3UWA6;Q3UWA6-2	Gucy2c	Heat-stable enterotoxin receptor;Isoform 2 of Heat-stable enterotoxin receptor	GUC2C_MOUSE	0	0	0	0	1.58513	0	4.08854	1.90473	NotSig	inf	0.182632	0.245991	NotSig				Enrich	inf	0.000102263	0.000590983	NotSig	inf	0.493308	0.580066	2.01282	0.0703152	0.131796	6.9254	9.62964	8.08598e-44	10.8847	1.07178e-70
Q3UX10	Tubal3	Tubulin alpha chain-like 3	TBAL3_MOUSE	5.42519	6.13352	3.10892	6.33083	9.92961	8.53236	9.27119	8.95281	Enrich	4.31504	0.00216458	0.00609896	Enrich	2.45665	0.00306829	0.0155757	NotSig	4.07722	0.0407241	0.060009	Enrich	2.61948	0.0067208	0.0314346	-0.625245	0.0475664	0.100922	0	#NAME?	0.406022
Q3UYC0	Ppm1h	Protein phosphatase 1H	PPM1H_MOUSE	0	0	0	1.14676	3.21868	2.44469	5.92258	5.71082	NotSig	inf	0.0727053	0.110719	NotSig	inf	0.0867502	0.176373	Enrich	inf	0.000104397	0.000590983	Enrich	4.5399	0.0061546	0.0299318	1.7567	0.104844	0.174079	4.50311	2.04075	5.68692e-06	1.22665	7.74472e-06
Q3UYG8	Macrod2	ADP-ribose glycohydrolase MACROD2	MACD2_MOUSE	0	0	0	0	4.3819	3.66774	5.78258	4.91839	Enrich	inf	3.61518e-07	9.5355e-05	Enrich	inf	0.000555267	0.00506263	Enrich	inf	3.19491e-05	0.000569659	NotSig	inf	0.0309755	0.0678132	1.46468	0.00178329	0.0115714	6.66623	1.26635	2.27015e-10	0.202161	0.195215
Q3UYH7	Adrbk2	Beta-adrenergic receptor kinase 2	ARBK2_MOUSE	0	0	0	0	2.56295	1.52488	4.90282	4.49574	NotSig	inf	0.0616587	0.0977959	NotSig	inf	0.193664	0.291617	Enrich	inf	0.000135377	0.000623571	NotSig	inf	0.0182024	0.0528583	1.96914	0.0730959	0.135025
Q3V038	Ttc9	Tetratricopeptide repeat protein 9A	TTC9A_MOUSE	0	0	0	0	0.724957	0	4.62225	4.49444	NotSig	inf	0.391002	0.443422	NotSig				Enrich	inf	0.000327318	0.00103995	Enrich	inf	0.00412123	0.0240348	3.92869	0.00875495	0.0316614	3.52604	-0.110311	0.893402	-1.10476	0.0358484
Q3V1L4	Nt5c2	Cytosolic purine 5'-nucleotidase	5NTC_MOUSE	0	0	1.04621	0	5.33103	4.09322	5.20206	5.22871	Enrich	inf	4.56659e-05	0.000348837	NotSig	inf	0.0596988	0.145715	Enrich	3.11139	0.0257129	0.0404665	Enrich	inf	0.0108677	0.0418426	-0.101542	0.654008	0.715202	4.99911	-0.044436	0.15744	0.210098	0.38575
Q3V1U8	Elmod1	ELMO domain-containing protein 1	ELMD1_MOUSE	11.079	11.3483	10.8736	9.33936	10.267	11.0318	8.17384	8.02402	NotSig	-0.854721	0.0985464	0.145076	NotSig	-0.359542	0.553755	0.604179	Deplete	-3.00828	0.0250772	0.0396182	NotSig	-1.41677	0.0376692	0.0748855	-1.941	0.016876	0.0489862	6.58014	0.907293	3.55044e-09	-2.30321	3.44217e-80
Q3V300	Kif22	Kinesin-like protein KIF22	KIF22_MOUSE	0	0	1.19951	0	0	0	0	0	NotSig				NotSig				NotSig	#NAME?	0.391002	0.422677								3.50111	4.1085	0.0102433	0.437077	0.704733
Q3V3Q7	Pacs2	Phosphofurin acidic cluster sorting protein 2	PACS2_MOUSE	0	0	0	0	4.27372	2.84762	5.65561	4.92788	Enrich	inf	0.000390682	0.001486	NotSig	inf	0.0639624	0.146043	Enrich	inf	4.80835e-05	0.000569659	NotSig	inf	0.0314066	0.0684275	1.39523	0.00446935	0.0205942	5.96101	-1.25853	4.13446e-06	1.63266	8.11743e-20
Q3V3V9-2	Carmil2	Isoform 2 of Capping protein, Arp2/3 and myosin-I linker protein 2	CARL2_MOUSE	0	0	0	0	3.44327	3.56114	6.31691	5.53978	Enrich	inf	0.000820323	0.00271794	Enrich	inf	0.000337911	0.00404885	Enrich	inf	0.000115564	0.000599543	NotSig	inf	0.0202855	0.0547766	2.97402	0.000161459	0.00363598
Q4ACU6;Q4ACU6-11;Q4ACU6-3;Q4ACU6-7	Shank3	SH3 and multiple ankyrin repeat domains protein 3;Isoform 3 of SH3 and multiple ankyrin repeat domains protein 3;Isoform 4 of SH3 and multiple ankyrin repeat domains protein 3;Isoform 6 of SH3 and multiple ankyrin repeat domains protein 3	SHAN3_MOUSE	0	0	0	2.87709	5.86678	2.02375	3.89703	4.38501	Enrich	inf	0.000108514	0.000564107	NotSig	inf	0.181794	0.288495	Enrich	inf	0.000956315	0.00246069	NotSig	0.948711	0.221674	0.311252	-1.9997	0.00228856	0.0134071	4.46421	1.64493	0.0353849	0.061509	0.0902709
Q4FZG7;Q9WVA2	Timm8a2;Timm8a1	Putative mitochondrial import inner membrane translocase subunit Tim8 A-B;Mitochondrial import inner membrane translocase subunit Tim8 A	TI8AB_MOUSE;TIM8A_MOUSE	0	1.79676	1.31779	0	0	5.35223	0	0	NotSig				NotSig	1.72028	0.213808	0.312146	NotSig	#NAME?	0.391002	0.422677
Q4JIM5	Abl2	Tyrosine-protein kinase ABL2	ABL2_MOUSE	0	0	0	3.10253	5.36605	2.83892	5.39064	5.31537	Enrich	inf	0.0071275	0.0165826	NotSig	inf	0.105686	0.203565	Enrich	inf	0.000143237	0.000637365	NotSig	0.0484828	0.30595	0.411298	-0.430213	0.978362	0.981754	6.20937	0.719101	1.13789e-05	0.578797	3.25572e-05
Q4KMM3;Q4KMM3-2;Q4KMM3-3;Q4KMM3-4	Oxr1	Oxidation resistance protein 1;Isoform 2 of Oxidation resistance protein 1;Isoform 3 of Oxidation resistance protein 1;Isoform 4 of Oxidation resistance protein 1	OXR1_MOUSE	0	0	0	0.626758	5.02418	2.01916	5.00579	4.58528	Enrich	inf	0.000191307	0.000839068	NotSig	inf	0.182618	0.288495	Enrich	inf	0.000121204	0.000599543	Enrich	4.31885	0.00514805	0.0274821	-0.031339	0.952104	0.959732	5.54716	-1.2419	0.000463846	-0.80225	0.105874
Q4KUS2	Unc13a	Protein unc-13 homolog A	UN13A_MOUSE	1.67336	0.937179	2.13814	2.77568	4.81526	4.68353	7.14257	6.5602	NotSig	0.0931092	0.156953	0.218986	NotSig	3.1226	0.0220212	0.0752912	NotSig	3.35032	0.0331224	0.0504933	NotSig	3.16448	0.0315716	0.0685901	2.4184	0.000861521	0.00784039	7.28431	1.69987	5.96459e-25	1.34134	2.39602e-18
Q4QQM4	Trp53i11	Tumor protein p53-inducible protein 11	P5I11_MOUSE	1.54236	1.33291	1.2771	2.26911	0	3.2192	3.49597	2.39909	NotSig	#NAME?	0.391002	0.443422	NotSig	0.654858	0.321778	0.438714	NotSig	2.78261	0.321851	0.366571	NotSig	0.104678	0.967312	0.974197	inf	0.116684	0.188545	3.71516	-1.53025	0.00130299	-0.741402	0.0136249
Q4V9Z5-2;Q4V9Z5-3	Sez6l2	Isoform 2 of Seizure 6-like protein 2;Isoform 3 of Seizure 6-like protein 2	SE6L2_MOUSE	0	0.697003	0	0	8.11923	3.89262	1.1257	3.26185	Enrich	inf	0.000115466	0.000591309	NotSig	4.24596	0.0900512	0.181329	NotSig	inf	0.391002	0.422677	Enrich	inf	0.0132153	0.0458069	-5.78269	0.00623608	0.0250308	7.56682	-1.20575	1.05557e-05	0.891774	3.63264e-16
Q4VAA2;Q4VAA2-2	Cdv3	Protein CDV3;Isoform 2 of Protein CDV3	CDV3_MOUSE	1.98193	3.80635	5.66321	0.626524	6.49102	6.75885	7.97143	6.91824	NotSig	0.581298	0.107002	0.156104	NotSig	1.30672	0.161414	0.28266	NotSig	2.01637	0.0372524	0.0558397	Enrich	6.67963	0.00208864	0.0175848	1.51752	0.00265029	0.0148355	7.61308	0.272153	2.91664e-10	2.39357	3.87501e-56
Q4VAE3	Tmem65	Transmembrane protein 65	TMM65_MOUSE	2.61487	4.1035	1.59703	6.48871	2.2151	5.51624	5.99016	6.56276	NotSig	-2.33082	0.863969	0.888539	NotSig	0.215806	0.436697	0.496841	NotSig	3.2037	0.0712722	0.096045	NotSig	0.144121	0.961614	0.97094	4.1716	0.0713917	0.133018	5.64914	-0.059283	0.437287	0.628005	0.00762967
Q501J6	Ddx17	Probable ATP-dependent RNA helicase DDX17	DDX17_MOUSE	1.47734	0	1.91893	0.944079	7.55653	5.2713	4.26836	1.80027	Enrich	3.71771	0.0244584	0.0470354	Enrich	inf	8.49828e-05	0.00287315	NotSig	1.33397	0.130699	0.163033	NotSig	0.809436	0.72368	0.774685	-3.36262	5.28282e-05	0.00241353	7.83078	0.116781	1.33458e-08	1.62105	1.48128e-39
Q505B7	Zbtb8os	Protein archease	ARCH_MOUSE	0	0	0	0	3.3894	0.782423	5.93728	4.56588	NotSig	inf	0.0617973	0.0979496	NotSig	inf	0.391002	0.454376	Enrich	inf	0.000178025	0.000697184	NotSig	inf	0.0239732	0.059246	1.83571	0.113937	0.185452	3.55339	-1.12323	0.0590372	-1.40011	0.00722075
Q505F5	Lrrc47	Leucine-rich repeat-containing protein 47	LRC47_MOUSE	0	0	0	0	3.34565	2.1014	5.1643	5.03649	NotSig	inf	0.0592596	0.0966099	NotSig	inf	0.182086	0.288495	Enrich	inf	0.000122015	0.000600614	NotSig	inf	0.0323566	0.0694309	1.14537	0.205254	0.29275	4.9629	-0.167606	0.262272	0.394703	0.0570426
Q50L41	Pla2g4f	Cytosolic phospholipase A2 zeta	PA24F_MOUSE	6.79631	7.05627	7.83251	8.05338	6.75814	7.54979	5.52372	7.37009	NotSig	-0.14665	0.959074	0.966809	NotSig	0.505269	0.306763	0.422232	Deplete	-2.53035	0.0301976	0.0467046	NotSig	-0.729832	0.0420882	0.0801015	-1.31588	0.0793458	0.142051
Q52KF3;Q52KF3-2;Q52KF3-3	Spire1	Protein spire homolog 1;Isoform 2 of Protein spire homolog 1;Isoform 3 of Protein spire homolog 1	SPIR1_MOUSE	0	0	0	0.98901	4.79081	2.42647	6.15132	5.362	Enrich	inf	6.25939e-05	0.000404057	NotSig	inf	0.0766525	0.161682	Enrich	inf	4.22429e-05	0.000569659	Enrich	4.78404	0.00262846	0.0196505	1.39898	0.000873441	0.00789918	5.97305	-0.931707	0.730173	-0.061173	0.044103
Q52KI8;Q52KI8-2	Srrm1	Serine/arginine repetitive matrix protein 1;Isoform 2 of Serine/arginine repetitive matrix protein 1	SRRM1_MOUSE	6.45358	6.78075	6.79868	6.7222	6.74185	7.34079	6.19428	6.11328	NotSig	0.190538	0.472569	0.527634	NotSig	0.485648	0.172239	0.288495	NotSig	-0.571772	0.0699806	0.0945265	NotSig	-0.783418	0.505481	0.584736	-0.516567	0.0912043	0.157363	8.26657	-0.498412	0.391108	0.316982	2.26731e-09
Q52KR3	Prune2	Protein prune homolog 2	PRUN2_MOUSE	0.226451	0	0	0	4.15116	3.39307	6.87645	6.09902	Enrich	6.30105	1.44415e-05	0.000201704	Enrich	inf	0.00258951	0.013586	Enrich	inf	3.53149e-05	0.000569659	NotSig	inf	0.027564	0.0635622	2.78744	3.78141e-05	0.00241353	7.11551	1.60111	5.81099e-23	2.21112	2.02713e-41
Q56A07	Scn2b	Sodium channel subunit beta-2	SCN2B_MOUSE	0	0	0	2.66603	5.33869	2.20825	5.91928	5.45669	Enrich	inf	0.00178996	0.00518692	NotSig	inf	0.182137	0.288495	Enrich	inf	7.32237e-05	0.000569659	NotSig	2.38454	0.0527699	0.0928842	0.351528	0.343635	0.435412	8.04622	2.18474	2.43529e-43	0.974792	2.86453e-20
Q571K4	Tab3	TGF-beta-activated kinase 1 and MAP3K7-binding protein 3	TAB3_MOUSE	0	0	0	0	0	0	4.80501	4.03985	NotSig				NotSig				Enrich	inf	7.76846e-05	0.000569659	NotSig	inf	0.0511612	0.0911947	inf	7.76846e-05	0.00273122	4.56296	0.774501	0.00402808	0.221008	0.0154208
Q58A65;Q58A65-2	Spag9	C-Jun-amino-terminal kinase-interacting protein 4;Isoform 2 of C-Jun-amino-terminal kinase-interacting protein 4	JIP4_MOUSE	0.952693	0.95695	1.39588	3.50149	6.5453	5.30833	6.48529	6.11609	Enrich	4.83108	0.00962326	0.0214457	NotSig	3.65407	0.0151272	0.0555779	Enrich	4.76148	0.00743502	0.0145208	Enrich	2.68908	0.000950327	0.0136148	-0.0169052	0.804096	0.846817	7.4062	-0.399275	0.220002	-0.035812	0.0438508
Q5DQR4;Q5DQR4-2;Q5DQR4-3;Q5DQR4-4;Q5DQR4-5;Q5DQR4-6	Stxbp5l	Syntaxin-binding protein 5-like;Isoform 2 of Syntaxin-binding protein 5-like;Isoform 3 of Syntaxin-binding protein 5-like;Isoform 4 of Syntaxin-binding protein 5-like;Isoform 5 of Syntaxin-binding protein 5-like;Isoform 6 of Syntaxin-binding protein 5-like	STB5L_MOUSE	0	0	0	0	3.73136	0.820878	4.76551	4.57068	Enrich	inf	0.00104027	0.00330721	NotSig	inf	0.391002	0.454376	Enrich	inf	5.57124e-05	0.000569659	Enrich	inf	0.00244273	0.0187609	1.01058	0.0299995	0.0719889	4.33673	0.087974	0.352246	-0.895636	3.54275e-05
Q5DTL9;Q5DTL9-2;Q5DTL9-3;Q5DTL9-4	Slc4a10	Sodium-driven chloride bicarbonate exchanger;Isoform 2 of Sodium-driven chloride bicarbonate exchanger;Isoform 3 of Sodium-driven chloride bicarbonate exchanger;Isoform 4 of Sodium-driven chloride bicarbonate exchanger	S4A10_MOUSE	5.06793	4.12777	0	5.16523	6.71418	5.48591	6.66408	6.87976	NotSig	1.47673	0.0371546	0.0671321	NotSig	0.468568	0.407367	0.468887	Enrich	inf	0.000161654	0.000668863	Enrich	1.73062	0.00217316	0.0176902	0.0110631	0.880641	0.904308	6.92235	1.8198	1.00401e-19	1.08948	1.39107e-14
Q5EBG8	Unknown	Uncharacterized protein C1orf50 homolog	CA050_MOUSE	0	0	0	0	0.557107	0	3.51491	1.10593	NotSig	inf	0.391002	0.443422	NotSig				Enrich	inf	0.00152311	0.00365389	NotSig	inf	0.5	0.580066	3.61161	0.00655208	0.0258334
Q5EBJ4	Ermn	Ermin	ERMIN_MOUSE	0	0	0	0	3.52972	0.91969	1.74728	1.93557	NotSig	inf	0.0712186	0.108927	NotSig	inf	0.391002	0.454376	NotSig	inf	0.0577572	0.0813078	NotSig	inf	0.5	0.580066	-3.06026	0.272968	0.364041	5.93085	-5.08518	9.67626e-114	-2.03928	7.93082e-05
Q5EG47	Prkaa1	5'-AMP-activated protein kinase catalytic subunit alpha-1	AAPK1_MOUSE	0	0	0.757496	2.1639	4.9115	3.32523	5.68899	4.94543	Enrich	inf	9.25235e-05	0.000515848	Enrich	inf	0.0034096	0.0169208	Enrich	4.84415	0.00605128	0.0121832	NotSig	1.57172	0.11463	0.175409	0.79147	0.01582	0.0464804	5.04124	0.212324	0.06393	0.888555	0.00356876
Q5F285	Tmem256	Transmembrane protein 256	TM256_MOUSE	1.79126	2.11731	1.84976	6.63564	6.42185	5.44182	6.65181	7.42859	NotSig	1.4079	0.0783416	0.118438	NotSig	-0.680111	0.216012	0.314328	NotSig	1.86525	0.07476	0.0999471	NotSig	1.00159	0.689827	0.746958	0.692863	0.787648	0.833743	5.99476	-2.56465	7.6467e-27	-1.94104	1.47324e-24
Q5F2E8	Taok1	Serine/threonine-protein kinase TAO1	TAOK1_MOUSE	0	0	0	0	4.65357	2.79863	5.78009	5.06979	Enrich	inf	0.000213523	0.000907556	NotSig	inf	0.0583345	0.145715	Enrich	inf	8.95638e-05	0.000585327	NotSig	inf	0.0203717	0.0548211	1.1491	0.00851862	0.0309321	8.11576	0.419898	7.43563e-13	0.134353	0.00196588
Q5FWK3	Arhgap1	Rho GTPase-activating protein 1	RHG01_MOUSE	8.03453	8.64301	8.07821	7.73928	7.28305	8.1634	6.69039	7.21687	NotSig	-0.848027	0.165991	0.230311	NotSig	-0.381429	0.424338	0.484229	NotSig	-1.77623	0.177188	0.214313	NotSig	-0.601422	0.165972	0.243627	-0.608926	0.128958	0.203937	5.173	0.190498	0.0748371	0.589858	0.0125494
Q5GH67	Xkr4	XK-related protein 4	XKR4_MOUSE	0	0	0	1.34317	0	0	5.11809	5.29665	NotSig				NotSig				Enrich	inf	0.000150729	0.000650289	Enrich	3.82335	0.0129322	0.0456609	inf	0.000150729	0.00359757	5.36831	1.88413	9.48819e-09	0.433117	0.122583
Q5HZI9	Slc25a51	Solute carrier family 25 member 51	S2551_MOUSE	0	0.707444	0	2.59564	0	0.624824	3.30954	4.17364	NotSig				NotSig	-0.392591	0.933137	0.949558	Enrich	inf	0.0093272	0.0175589	NotSig	1.21354	0.169152	0.247778	inf	0.0093272	0.0331201	5.87101	-0.074007	0.368424	0.837023	0.000478431
Q5KU39	Vps41	Vacuolar protein sorting-associated protein 41 homolog	VPS41_MOUSE	0	0	0	0	4.67333	1.76868	3.33773	1.53678	Enrich	inf	0.000310284	0.00123534	NotSig	inf	0.188458	0.288766	Enrich	inf	0.000713099	0.00191383	NotSig	inf	0.5	0.580066	-1.42846	0.00732143	0.0279897	6.75102	0.220759	0.00096975	0.001491	0.390612
Q5M8N0	Cnrip1	CB1 cannabinoid receptor-interacting protein 1	CNRP1_MOUSE	0	0	2.84787	3.673	5.54194	5.10078	7.07764	7.46428	Enrich	inf	6.24975e-06	0.000150224	Enrich	inf	0.000359579	0.0042289	Enrich	3.87341	0.0164373	0.0280372	Enrich	3.8841	0.0030027	0.0207659	1.64151	0.0136961	0.042229	6.49122	1.13153	3.42867e-12	1.41526	2.01412e-15
Q5PR73	Diras2	GTP-binding protein Di-Ras2	DIRA2_MOUSE	0	0.888608	0	1.01956	5.55432	2.43444	7.07516	6.67419	Enrich	inf	1.25837e-06	0.000119462	NotSig	2.44259	0.396688	0.459378	Enrich	inf	7.87339e-05	0.000569659	Enrich	4.68169	0.0102834	0.0408286	1.59043	0.0061481	0.0247556	6.46227	2.67364	2.98104e-20	-0.147196	0.0676536
Q5RJG7	Crppa	D-ribitol-5-phosphate cytidylyltransferase	ISPD_MOUSE	0	0	0	0	1.41118	0	3.60211	3.40527	NotSig	inf	0.184091	0.24623	NotSig				Enrich	inf	0.00013115	0.000615553	NotSig	inf	0.0799861	0.129591	1.87252	0.0737656	0.135886
Q5RJI5	Brsk1	Serine/threonine-protein kinase BRSK1	BRSK1_MOUSE	0	0	0	0	4.96126	4.48992	6.1209	6.02412	Enrich	inf	3.14711e-05	0.00028945	Enrich	inf	0.000610055	0.00523817	Enrich	inf	9.25165e-05	0.000590983	Enrich	inf	0.0156657	0.049479	1.21574	0.00590919	0.0242937	7.28376	1.29912	5.27426e-17	1.77242	5.41987e-30
Q5SP85;Q5SP85-2	Ccdc85a	Coiled-coil domain-containing protein 85A;Isoform 2 of Coiled-coil domain-containing protein 85A	CC85A_MOUSE	0	0	0	0	2.25191	0.68776	4.9135	4.26161	NotSig	inf	0.0591582	0.0966099	NotSig	inf	0.391002	0.454376	Enrich	inf	8.71691e-05	0.000580051	NotSig	inf	0.0177311	0.0523584	2.4799	0.0361249	0.0821252	5.63843	0.587638	3.09787e-07	1.71794	1.55995e-10
Q5SQX6	Cyfip2	Cytoplasmic FMR1-interacting protein 2	CYFP2_MOUSE	4.84574	4.98827	5.23266	5.8681	6.97197	6.26379	8.47363	8.61599	Enrich	2.18712	0.00281569	0.00761371	NotSig	1.26687	0.0657851	0.147205	Enrich	3.23927	0.000238859	0.000828642	Enrich	2.75064	0.000400131	0.0114913	1.46543	0.011932	0.0387122	8.5706	1.36952	1.47072e-45	0.410046	1.08591e-08
Q5SRX1;Q5SRX1-2	Tom1l2	TOM1-like protein 2;Isoform 2 of TOM1-like protein 2	TM1L2_MOUSE	0.695516	1.52621	3.14187	3.63382	8.65508	7.0987	9.47086	8.44961	Enrich	8.10833	0.00119503	0.00371756	NotSig	3.09039	0.0331128	0.100663	Enrich	5.66703	0.00897993	0.017028	Enrich	4.91671	8.34794e-06	0.0110537	0.843166	0.0180396	0.0513548	7.64895	1.37874	3.4129e-26	2.23657	5.81569e-59
Q5SSH8	Cyb5d2	Neuferricin	NEUFC_MOUSE	6.26882	6.65204	5.79783	6.65028	6.16473	6.87574	5.23797	6.46124	NotSig	-0.154087	0.811828	0.842146	NotSig	0.2904	0.67301	0.716656	NotSig	-0.589324	0.375954	0.421827	NotSig	-0.266598	0.54395	0.620553	-0.86005	0.092605	0.159333	3.42415	-1.22569	0.0545317	-0.716867	0.564297
Q5SSL4	Abr	Active breakpoint cluster region-related protein	ABR_MOUSE	1.36324	1.23191	0	3.774	6.62796	5.83292	7.36664	6.97297	NotSig	3.21225	0.0300439	0.0557882	NotSig	3.03789	0.0294633	0.0926389	Enrich	inf	6.41415e-05	0.000569659	Enrich	3.27226	0.000143387	0.0113696	0.777095	0.0389428	0.0866927	7.66171	0.772743	4.4094e-18	0.972719	1.49975e-20
Q5SSM3;Q5SSM3-2;Q5SSM3-3	Arhgap44	Rho GTPase-activating protein 44;Isoform 2 of Rho GTPase-activating protein 44;Isoform 3 of Rho GTPase-activating protein 44	RHG44_MOUSE	4.79081	1.12609	4.0841	4.30462	5.95745	5.85766	8.01439	6.8353	NotSig	0.842905	0.137278	0.194195	NotSig	3.50291	0.0206969	0.0716845	NotSig	2.86594	0.0677716	0.0920628	NotSig	1.33894	0.186214	0.268131	2.05905	0.00037446	0.00555737	7.36179	2.7895	1.42565e-32	2.5566	1.23288e-52
Q5SV85;Q5SV85-2	Synrg	Synergin gamma;Isoform 2 of Synergin gamma	SYNRG_MOUSE	3.6424	4.79918	1.07683	3.53758	6.5941	5.47645	7.64122	6.56663	NotSig	2.05585	0.0994378	0.146232	NotSig	0.639465	0.119551	0.223948	Enrich	5.47772	0.0066549	0.0131585	NotSig	2.00839	0.0948427	0.149317	1.12605	0.032441	0.0762666	7.38476	0.393684	2.04506e-10	1.43394	1.123e-23
Q5SVL6	Rap1gap2	Rap1 GTPase-activating protein 2	RPGP2_MOUSE	0	0	0	0.569968	6.55199	5.40538	7.47834	6.51607	Enrich	inf	1.22456e-05	0.000186283	Enrich	inf	0.000163254	0.00311541	Enrich	inf	4.85073e-05	0.000569659	Enrich	6.56037	0.00124726	0.0149831	0.96097	0.0134235	0.0416445	5.87431	2.98892	1.67456e-12	1.97109	7.87728e-18
Q5SWP3	Nacad	NAC-alpha domain-containing protein 1	NACAD_MOUSE	0	0	0	0	5.69134	3.48439	0	0	Enrich	inf	0.00081394	0.00270004	NotSig	inf	0.181703	0.288495	NotSig								#NAME?	0.00081394	0.00767371	5.54856	-0.031365	0.318463	1.54479	1.00763e-09
Q5SWU9	Acaca	Acetyl-CoA carboxylase 1	ACACA_MOUSE	10.466	10.7636	9.69455	10.2216	9.54081	10.1266	8.40572	9.87877	NotSig	-0.909679	0.291605	0.366505	NotSig	-0.462276	0.477838	0.533844	NotSig	-1.44901	0.150568	0.184528	NotSig	-0.391933	0.222804	0.312682	-1.22392	0.182759	0.269392	5.99599	0.2755	0.000751757	4.34918	4.08306e-33
Q5SWU9-2	Acaca	Isoform 2 of Acetyl-CoA carboxylase 1	ACACA_MOUSE	6.12676	6.39302	4.68242	6.40833	5.34689	5.56708	4.42221	5.70795	NotSig	-0.513098	0.338373	0.417089	NotSig	-0.410047	0.418638	0.478546	NotSig	-1.38425	0.89184	0.901264	NotSig	-0.778382	0.0704737	0.117289	-0.876393	0.341221	0.432921	5.99599	0.2755	0.000751757	4.34918	4.08306e-33
Q5SXY1;Q5SXY1-2;Q5SXY1-3	Specc1	Cytospin-B;Isoform 2 of Cytospin-B;Isoform 4 of Cytospin-B	CYTSB_MOUSE	0	0	0	0	7.06163	2.55608	5.76477	5.31444	Enrich	inf	7.20751e-06	0.000157952	NotSig	inf	0.190681	0.289748	Enrich	inf	5.62931e-05	0.000569659	NotSig	inf	0.0242984	0.0594454	-1.29563	0.00129569	0.00981601	6.03751	-1.29311	8.83765e-05	0.138326	0.1287
Q5U3K5	Rabl6	Rab-like protein 6	RABL6_MOUSE	2.12335	3.43398	0.845834	2.80077	4.59651	4.07134	5.49601	5.36607	NotSig	2.12827	0.0533144	0.0919213	NotSig	0.651851	0.0561229	0.145715	Enrich	4.26941	0.00945722	0.0177571	NotSig	2.07087	0.0729966	0.12056	0.955793	0.0157831	0.0464662	8.40123	0.852647	2.97195e-22	0.238448	1.48146e-05
Q5U405	Tmprss13	Transmembrane protease serine 13	TMPSD_MOUSE	11.2783	12.1056	11.284	9.07822	11.8487	11.5835	9.15541	9.81979	NotSig	0.251969	0.564587	0.616403	NotSig	-0.289116	0.463197	0.520754	NotSig	-1.75306	0.0606711	0.0843341	NotSig	0.426399	0.379538	0.491424	-2.34789	0.0293426	0.0708826
Q5U419	Mfsd3	Major facilitator superfamily domain-containing protein 3	MFSD3_MOUSE	0.519821	0	0	0.670079	0	0	1.29828	1.05959	NotSig	#NAME?	0.391002	0.443422	NotSig				NotSig	inf	0.391002	0.422677	NotSig	0.306168	0.787352	0.828001	inf	0.391002	0.469332	3.01415	0.180367	0.58797	-0.351389	0.137135
Q5U680	Slc25a26	S-adenosylmethionine mitochondrial carrier protein	SAMC_MOUSE	0.513665	0	0	1.13719	0	0	1.94093	2.65166	NotSig	#NAME?	0.391002	0.443422	NotSig				NotSig	inf	0.19155	0.228601	NotSig	0.896235	0.168107	0.246505	inf	0.19155	0.278426	2.90236	-1.94628	0.323721	-1.59981	0.000174381
Q5XG69	Fam169a	Soluble lamin-associated protein of 75 kDa	F169A_MOUSE	0	0	0	0	4.23995	0	0	0	Enrich	inf	0.00285107	0.00769046	NotSig				NotSig								#NAME?	0.00285107	0.015359	5.34379	2.37098	1.13717e-07	0.312635	0.0279062
Q5XJV6	Lmtk3	Serine/threonine-protein kinase LMTK3	LMTK3_MOUSE	0	0	0	0	6.24329	2.26019	3.17905	1.5544	Enrich	inf	4.19943e-05	0.00033966	NotSig	inf	0.183925	0.288495	Enrich	inf	0.0012321	0.00304356	NotSig	inf	0.5	0.580066	-3.16035	0.000173764	0.00376488	7.27933	2.58021	4.7107e-29	1.78824	1.10763e-31
Q5XKN4	Jagn1	Protein jagunal homolog 1	JAGN1_MOUSE	1.09769	1.07027	0	5.06056	2.70349	2.47563	4.85769	5.81862	NotSig	1.1297	0.326933	0.404438	NotSig	0.871702	0.364129	0.454376	Enrich	inf	0.0210749	0.034335	NotSig	0.45691	0.326036	0.433532	2.56457	0.200932	0.289014	5.34414	-0.153463	0.853476	-0.800113	0.00663797
Q60597;Q60597-2;Q60597-3;Q60597-4	Ogdh	2-oxoglutarate dehydrogenase, mitochondrial;Isoform 2 of 2-oxoglutarate dehydrogenase, mitochondrial;Isoform 3 of 2-oxoglutarate dehydrogenase, mitochondrial;Isoform 4 of 2-oxoglutarate dehydrogenase, mitochondrial	ODO1_MOUSE	5.97962	6.08278	5.49564	7.43959	6.76002	6.27345	6.99808	8.05947	NotSig	0.597567	0.204186	0.265867	NotSig	0.19498	0.718586	0.760318	Enrich	1.40217	0.0218912	0.0353836	NotSig	0.572376	0.0688406	0.115322	0.245638	0.413711	0.489684	8.35634	1.02675	1.27653e-26	1.21963	1.26892e-37
Q60598	Cttn	Src substrate cortactin	SRC8_MOUSE	4.2471	4.9766	4.99062	5.16397	9.58318	8.02725	10.4109	9.01071	Enrich	5.07346	0.00218074	0.00612568	Enrich	3.05584	0.000153566	0.00311293	Enrich	5.49657	8.53048e-06	0.000569659	Enrich	3.82205	0.000570417	0.0129938	0.874303	0.0421102	0.0921837	5.63158	0.607705	0.00365381	0.572376	0.000576422
Q60605;Q60605-2	Myl6	Myosin light polypeptide 6;Isoform Smooth muscle of Myosin light polypeptide 6	MYL6_MOUSE	2.84227	3.57706	6.85943	3.87009	7.20761	8.60549	6.83622	6.02742	NotSig	1.80157	0.0895414	0.133102	NotSig	1.8552	0.101112	0.197329	NotSig	-0.0200004	0.959635	0.962991	NotSig	1.06272	0.212697	0.30075	-0.328896	0.395896	0.473109	5.61364	-2.37595	3.5422e-16	-0.780046	0.649437
Q60613	Adora2a	Adenosine receptor A2a	AA2AR_MOUSE	0	0	0	0.613404	0	0	5.37696	4.1723	NotSig				NotSig				Enrich	inf	1.86849e-05	0.000569659	Enrich	3.92761	0.0100565	0.0402579	inf	1.86849e-05	0.00217623	0.804483	#NAME?	0.248057	-7.29686	2.7029e-57
Q60625	Icam5	Intercellular adhesion molecule 5	ICAM5_MOUSE	0	0	0	4.00056	1.56642	0.872778	5.97792	5.34664	NotSig	inf	0.186538	0.247458	NotSig	inf	0.391002	0.454376	Enrich	inf	0.000311176	0.00100311	NotSig	1.30797	0.0198353	0.0543047	4.03064	0.0126022	0.0400337	1.71597	2.23732	0.406022	-5.37995	6.76865e-60
[truncated: 1,729 more rows]

## Sheet: APEX2_Filtered
ProteinAccessions	Genes	ProteinDescriptions	ProteinNames	VM_Ctrl_Log2_avg	MFB_Ctrl_Log2_avg	Str_Ctrl_Log2_avg	Syn_Ctrl_Log2_avg	VM_APEX2_Log2_avg	MFB_APEX2_Log2_avg	Str_APEX2_Log2_avg	Syn_APEX2_Log2_avg	VM_APEX_v_Ctrl	VM_APEX_v_Ctrl_Log2FC	VM_APEX_v_Ctrl_pvalue	VM_APEX_v_Ctrl_qvalue	MFB_APEX_v_Ctrl	MFB_APEX_v_Ctrl_Log2FC	MFB_APEX_v_Ctrl_pvalue	MFB_APEX_v_Ctrl_qvalue	Str_APEX_v_Ctrl	Str_APEX_v_Ctrl_Log2FC	Str_APEX_v_Ctrl_pvalue	Str_APEX_v_Ctrl_qvalue	Syn_APEX_v_Ctrl	Syn_APEX_v_Ctrl_Log2FC	Syn_APEX_v_Ctrl_pvalue	Syn_APEX_v_Ctrl_qvalue	APEX_VM_v_Str_Log2FC	APEX_VM_v_Str_pvalue	APEX_VM_v_Str_qvalue	scRNA_DA_Log2CPM	scRNA_DAN_vs_VM_Log2FC	scRNA_DAN_vs_VM_FDR	scRNA_DAN_vs_STR_Log2FC	scRNA_DAN_vs_STR_FDR	Regions_Passed_Filters
[truncated: 1,733 more rows]
