# Supplementary material for: Subcellular proteomics of dopamine neurons in the mouse brain
Source: eLife. 2022 Jan 31;11:e70921. doi: 10.7554/eLife.70921 (PMC8860448; doi:10.7554/eLife.70921)
Supplement: Figure 3—source data 3. — (1) Enrichr analysis using terms from COMPARTMENTS resource. (2) Enrichr analysis using terms from BP/MF/CC GO Consortium resource. [file elife-70921-fig3-data3.xlsx]

## Sheet: VM_373_GO_BP
Term	Overlap	P-value	Adjusted P-value	Old P-value	Old Adjusted P-value	Odds Ratio	Combined Score	Genes
regulation of mRNA stability (GO:0043488)	24/128	1.54728e-17	1.82438e-14	0	0	12.9092	499.682	PSMD11;ANP32A;YTHDF3;FMR1;CIRBP;ELAVL1;PSMA7;FXR1;PSMA5;PSMA6;PSMB7;PSMA3;PSMC5;PSMB5;PSMC6;PSMA1;PSMA2;PSMB3;PSMC4;KHSRP;PSMC1;PSMC2;SERBP1;HNRNPD
negative regulation of cell cycle G2/M phase transition (GO:1902750)	19/69	1.73916e-17	1.82438e-14	0	0	21.0149	810.975	USP47;PSMD11;BRCC3;PSMA7;RBX1;PSMA5;PSMA6;PSMB7;PSMA3;PSMC5;PSMB5;PSMC6;PSMA1;PSMA2;PSMB3;PSMC4;PSMC1;PSMC2;SKP1
negative regulation of G2/M transition of mitotic cell cycle (GO:0010972)	18/62	4.33367e-17	3.03068e-14	0	0	22.5668	850.263	USP47;PSMD11;PSMA7;RBX1;PSMA5;PSMA6;PSMB7;PSMA3;PSMC5;PSMB5;PSMC6;PSMA1;PSMA2;PSMB3;PSMC4;PSMC1;PSMC2;SKP1
SCF-dependent proteasomal ubiquitin-dependent protein catabolic process (GO:0031146)	18/72	8.19539e-16	4.29848e-13	0	0	18.3784	638.425	PSMD11;FBXO2;PSMA7;RBX1;PSMA5;PSMA6;PSMB7;PSMA3;PSMC5;PSMB5;PSMC6;PSMA1;PSMA2;PSMB3;PSMC4;PSMC1;PSMC2;SKP1
negative regulation of mitotic cell cycle phase transition (GO:1901991)	18/79	4.83565e-15	2.02904e-12	0	0	16.2636	536.093	USP47;PSMD11;PSMA7;RBX1;PSMA5;PSMA6;PSMB7;PSMA3;PSMC5;PSMB5;PSMC6;PSMA1;PSMA2;PSMB3;PSMC4;PSMC1;PSMC2;SKP1
regulation of cellular amine metabolic process (GO:0033238)	15/51	1.50417e-14	4.50821e-12	0	0	22.8014	725.723	PSMD11;PSMA7;PSMA5;PSMA6;PSMB7;PSMA3;PSMC5;PSMB5;PSMC6;PSMA1;PSMA2;PSMB3;PSMC4;PSMC1;PSMC2
regulation of cellular amino acid metabolic process (GO:0006521)	15/51	1.50417e-14	4.50821e-12	0	0	22.8014	725.723	PSMD11;PSMA7;PSMA5;PSMA6;PSMB7;PSMA3;PSMC5;PSMB5;PSMC6;PSMA1;PSMA2;PSMB3;PSMC4;PSMC1;PSMC2
regulation of transcription from RNA polymerase II promoter in response to hypoxia (GO:0061418)	17/78	6.18832e-14	1.62289e-11	0	0	15.3169	465.841	PSMD11;SIRT2;PSMA7;RBX1;PSMA5;PSMA6;PSMB7;PSMA3;PSMC5;PSMB5;PSMC6;PSMA1;PSMA2;PSMB3;PSMC4;PSMC1;PSMC2
interleukin-1-mediated signaling pathway (GO:0070498)	18/95	1.48807e-13	3.46886e-11	0	0	12.8736	380.236	PSMD11;PSMA7;RBX1;PSMA5;PSMA6;PSMB7;PSMA3;PSMC5;PSMB5;PSMC6;PSMA1;PSMA2;PSMB3;PSMC4;PSMC1;PSMC2;SQSTM1;SKP1
regulation of cellular ketone metabolic process (GO:0010565)	15/61	2.80978e-13	5.89492e-11	0	0	17.8355	515.455	PSMD11;PSMA7;PSMA5;PSMA6;PSMB7;PSMA3;PSMC5;PSMB5;PSMC6;PSMA1;PSMA2;PSMB3;PSMC4;PSMC1;PSMC2
regulation of G2/M transition of mitotic cell cycle (GO:0010389)	21/149	6.05881e-13	1.06465e-10	0	0	9.08822	255.671	USP47;HSP90AA1;PSMD11;TUBB4B;TUBB4A;PSMA7;RBX1;PSMA5;PSMA6;PSMB7;PSMA3;PSMC5;PSMB5;PSMC6;PSMA1;PSMA2;PSMB3;PSMC4;PSMC1;PSMC2;SKP1
positive regulation of ubiquitin-protein ligase activity involved in regulation of mitotic cell cycle transition (GO:0051437)	16/76	6.08949e-13	1.06465e-10	0	0	14.6159	411.101	PSMD11;PSMA7;PSMA5;PSMA6;PSMB7;PSMA3;PSMC5;PSMB5;PSMC6;PSMA1;PSMA2;PSMB3;PSMC4;PSMC1;PSMC2;SKP1
antigen processing and presentation of exogenous peptide antigen via MHC class I (GO:0042590)	16/78	9.34836e-13	1.50868e-10	0	0	14.1429	391.737	PSMD11;LNPEP;PSMA7;PSMA5;PSMA6;PSMB7;PSMA3;PSMC5;PSMB5;PSMC6;PSMA1;PSMA2;PSMB3;PSMC4;PSMC1;PSMC2
NIK/NF-kappaB signaling (GO:0038061)	16/80	1.41652e-12	2.12276e-10	0	0	13.6996	373.763	PSMD11;PSMA7;PSMA5;PSMA6;PSMB7;PSMA3;PSMC5;PSMB5;PSMC6;PSMA1;PSMA2;PSMB3;PSMC4;PSMC1;PSMC2;SKP1
positive regulation of ubiquitin protein ligase activity (GO:1904668)	16/82	2.1201e-12	2.96531e-10	0	0	13.2831	357.043	PSMD11;PSMA7;PSMA5;PSMA6;PSMB7;PSMA3;PSMC5;PSMB5;PSMC6;PSMA1;PSMA2;PSMB3;PSMC4;PSMC1;PSMC2;SKP1
MAPK cascade (GO:0000165)	27/278	2.75889e-12	3.61759e-10	0	0	6.0239	160.333	PSMD11;PSMA7;PSMB7;SYNGAP1;PSMB5;PSMB3;ERBB4;NEFL;HRAS;SKP1;DAB2IP;GRIN2B;GRIN2D;RBX1;PSMA5;PSMA6;PSMA3;PSMC5;PSMC6;PSMA1;RASA3;PSMA2;PSMC4;PSMC1;GPRIN1;PSMC2;SHANK3
negative regulation of ubiquitin-protein ligase activity involved in mitotic cell cycle (GO:0051436)	15/71	3.07675e-12	3.79707e-10	0	0	14.6431	388.147	PSMD11;PSMA7;PSMA5;PSMA6;PSMB7;PSMA3;PSMC5;PSMB5;PSMC6;PSMA1;PSMA2;PSMB3;PSMC4;PSMC1;PSMC2
regulation of ubiquitin-protein ligase activity involved in mitotic cell cycle (GO:0051439)	15/72	3.82126e-12	4.45389e-10	0	0	14.3855	378.2	PSMD11;PSMA7;PSMA5;PSMA6;PSMB7;PSMA3;PSMC5;PSMB5;PSMC6;PSMA1;PSMA2;PSMB3;PSMC4;PSMC1;PSMC2
positive regulation of protein ubiquitination involved in ubiquitin-dependent protein catabolic process (GO:2000060)	16/87	5.52831e-12	6.10441e-10	0	0	12.3445	319.983	PSMD11;PSMA7;PSMA5;PSMA6;PSMB7;PSMA3;PSMC5;PSMB5;PSMC6;PSMA1;PSMA2;PSMB3;PSMC4;PSMC1;PSMC2;SKP1
cellular response to interleukin-1 (GO:0071347)	20/150	6.22314e-12	6.52808e-10	0	0	8.49728	219.253	PSMD11;USP10;DAB2IP;PSMA7;RBX1;PSMA5;PSMA6;PSMB7;PSMA3;PSMC5;PSMB5;PSMC6;PSMA1;PSMA2;PSMB3;PSMC4;PSMC1;PSMC2;SQSTM1;SKP1
regulation of stem cell differentiation (GO:2000736)	16/88	6.64337e-12	6.63705e-10	0	0	12.1724	313.287	PSMD11;PSMA7;PSMA5;PSMA6;PSMB7;PSMA3;PSMC5;PSMB5;PSMC6;PSMA1;PSMA2;PSMB3;PSMC4;PSMC1;PSMC2;OCIAD1
antigen processing and presentation of exogenous peptide antigen via MHC class I, TAP-dependent (GO:0002479)	15/75	7.16742e-12	6.83511e-10	0	0	13.6641	350.641	PSMD11;PSMA7;PSMA5;PSMA6;PSMB7;PSMA3;PSMC5;PSMB5;PSMC6;PSMA1;PSMA2;PSMB3;PSMC4;PSMC1;PSMC2
regulation of hematopoietic stem cell differentiation (GO:1902036)	15/76	8.78019e-12	8.00906e-10	0	0	13.4394	342.148	PSMD11;PSMA7;PSMA5;PSMA6;PSMB7;PSMA3;PSMC5;PSMB5;PSMC6;PSMA1;PSMA2;PSMB3;PSMC4;PSMC1;PSMC2
negative regulation of ubiquitin protein ligase activity (GO:1904667)	15/77	1.07216e-11	8.87443e-10	0	0	13.222	333.971	PSMD11;PSMA7;PSMA5;PSMA6;PSMB7;PSMA3;PSMC5;PSMB5;PSMC6;PSMA1;PSMA2;PSMB3;PSMC4;PSMC1;PSMC2
regulation of hematopoietic progenitor cell differentiation (GO:1901532)	15/77	1.07216e-11	8.87443e-10	0	0	13.222	333.971	PSMD11;PSMA7;PSMA5;PSMA6;PSMB7;PSMA3;PSMC5;PSMB5;PSMC6;PSMA1;PSMA2;PSMB3;PSMC4;PSMC1;PSMC2
stimulatory C-type lectin receptor signaling pathway (GO:0002223)	18/121	1.09979e-11	8.87443e-10	0	0	9.61116	242.521	PSMD11;PSMA7;PSMA5;PSMA6;PSMB7;PSMA3;PSMC5;PSMB5;PSMC6;PSMA1;PSMA2;PSMB3;PSMC4;PSMC1;PSMC2;HRAS;PAK2;SKP1
anaphase-promoting complex-dependent catabolic process (GO:0031145)	15/79	1.58408e-11	1.20308e-09	0	0	12.8075	318.502	PSMD11;PSMA7;PSMA5;PSMA6;PSMB7;PSMA3;PSMC5;PSMB5;PSMC6;PSMA1;PSMA2;PSMB3;PSMC4;PSMC1;PSMC2
regulation of transcription from RNA polymerase II promoter in response to stress (GO:0043618)	16/93	1.60564e-11	1.20308e-09	0	0	11.3791	282.826	PSMD11;PSMA7;RBX1;PSMA5;PSMA6;PSMB7;PSMA3;PSMC5;PSMB5;PSMC6;PSMA1;PSMA2;PSMB3;PSMC4;PSMC1;PSMC2
innate immune response activating cell surface receptor signaling pathway (GO:0002220)	18/124	1.68022e-11	1.21555e-09	0	0	9.33771	231.664	PSMD11;PSMA7;PSMA5;PSMA6;PSMB7;PSMA3;PSMC5;PSMB5;PSMC6;PSMA1;PSMA2;PSMB3;PSMC4;PSMC1;PSMC2;HRAS;PAK2;SKP1
positive regulation of canonical Wnt signaling pathway (GO:0090263)	17/113	3.44803e-11	2.41132e-09	0	0	9.71521	234.046	USP47;PSMD11;PSMA7;PSMA5;PSMA6;PSMB7;PSMA3;PSMC5;PSMB5;PSMC6;PSMA1;PSMA2;PSMB3;PSMC4;PSMC1;PSMC2;PIN1
regulation of mitotic cell cycle phase transition (GO:1901990)	21/184	3.76427e-11	2.54756e-09	0	0	7.12395	170.995	HSP90AA1;PSMD11;TUBB4B;TUBB4A;SIRT2;PSMA7;DDB1;PSMA5;PSMA6;PSMB7;PSMA3;PSMC5;PSMB5;PSMC6;PSMA1;PSMA2;PSMB3;PSMC4;PSMC1;PSMC2;SKP1
Wnt signaling pathway, planar cell polarity pathway (GO:0060071)	15/88	8.00701e-11	5.2496e-09	0	0	11.2233	260.921	PSMD11;PSMA7;PSMA5;PSMA6;PSMB7;PSMA3;PSMC5;PSMB5;PSMC6;PSMA1;PSMA2;PSMB3;PSMC4;PSMC1;PSMC2
regulation of establishment of planar polarity (GO:0090175)	15/89	9.46866e-11	6.01977e-09	0	0	11.0711	255.525	PSMD11;PSMA7;PSMA5;PSMA6;PSMB7;PSMA3;PSMC5;PSMB5;PSMC6;PSMA1;PSMA2;PSMB3;PSMC4;PSMC1;PSMC2
regulation of primary metabolic process (GO:0080090)	18/139	1.17788e-10	7.26819e-09	0	0	8.17386	186.872	PSMD11;LRP1;ACSL1;CACYBP;PSMA7;PSMA5;PSMA6;PSMB7;PSMA3;PSMC5;PSMB5;PSMC6;PSMA1;PSMA2;PSMB3;PSMC4;PSMC1;PSMC2
proteasomal ubiquitin-independent protein catabolic process (GO:0010499)	44463	2.53192e-10	1.48177e-08	0	0	32.3275	714.336	PSMA5;PSMA6;PSMB7;PSMA3;PSMB5;PSMA1;PSMA2;PSMB3;PSMA7
proteasome-mediated ubiquitin-dependent protein catabolic process (GO:0043161)	25/291	2.5426e-10	1.48177e-08	0	0	5.22886	115.519	PSMD11;NEDD4L;PSMA7;UBE2J1;BAG6;PSMB7;PSMB5;PSMB3;SEC61B;SKP1;CSNK1A1;FBXO2;SIRT2;RBX1;DDB1;PSMA5;PSMA6;PSMA3;PSMC5;PSMC6;PSMA1;PSMA2;PSMC4;PSMC1;PSMC2
protein catabolic process (GO:0030163)	14/81	2.84154e-10	1.61123e-08	0	0	11.3849	250.256	HSP90AA1;FBXO2;DAB2IP;PSMA7;DDB1;PSMA5;BAG6;PSMA6;PSMB7;PSMA3;PSMB5;PSMA1;PSMA2;PSMB3
negative regulation of canonical Wnt signaling pathway (GO:0090090)	18/148	3.36458e-10	1.8576e-08	0	0	7.60446	165.873	PSMD11;CSNK1A1;DAB2IP;PSMA7;RBX1;PSMA5;PSMA6;PSMB7;PSMA3;PSMC5;PSMB5;PSMC6;PSMA1;PSMA2;PSMB3;PSMC4;PSMC1;PSMC2
cellular response to hypoxia (GO:0071456)	17/132	4.24593e-10	2.28409e-08	0	0	8.1022	174.845	PSMD11;SIRT2;PSMA7;RBX1;PSMA5;PSMA6;PSMB7;PSMA3;PSMC5;PSMB5;PSMC6;PSMA1;PSMA2;PSMB3;PSMC4;PSMC1;PSMC2
regulation of canonical Wnt signaling pathway (GO:0060828)	21/213	5.87728e-10	3.08263e-08	0	0	6.03893	128.356	USP47;PSMD11;CSNK1A1;DAB2IP;PSMA7;PPP1CA;RBX1;PSMA5;PSMA6;PSMB7;PSMA3;PSMC5;PSMB5;PSMC6;PSMA1;PSMA2;PSMB3;PSMC4;PSMC1;PSMC2;PIN1
negative regulation of Wnt signaling pathway (GO:0030178)	19/174	6.98052e-10	3.57198e-08	0	0	6.74263	142.153	PSMD11;LRP1;CSNK1A1;DAB2IP;PSMA7;RBX1;PSMA5;PSMA6;PSMB7;PSMA3;PSMC5;PSMB5;PSMC6;PSMA1;PSMA2;PSMB3;PSMC4;PSMC1;PSMC2
proteasomal protein catabolic process (GO:0010498)	22/237	7.21143e-10	3.60228e-08	0	0	5.6591	119.125	PSMD11;CSNK1A1;NEDD4L;SIRT2;PSMA7;RBX1;DDB1;PSMA5;BAG6;PSMA6;PSMB7;PSMA3;PSMC5;PSMB5;PSMC6;PSMA1;PSMA2;PSMB3;PSMC4;PSMC1;PSMC2;SKP1
positive regulation of Wnt signaling pathway (GO:0030177)	17/140	1.07492e-09	5.24461e-08	0	0	7.57212	156.372	USP47;PSMD11;PSMA7;PSMA5;PSMA6;PSMB7;PSMA3;PSMC5;PSMB5;PSMC6;PSMA1;PSMA2;PSMB3;PSMC4;PSMC1;PSMC2;PIN1
tumor necrosis factor-mediated signaling pathway (GO:0033209)	16/123	1.20106e-09	5.72686e-08	0	0	8.17613	167.938	PSMD11;PSMA7;PSMA5;PSMA6;PSMB7;PSMA3;PSMC5;PSMB5;PSMC6;PSMA1;TRAF3;PSMA2;PSMB3;PSMC4;PSMC1;PSMC2
T cell receptor signaling pathway (GO:0050852)	18/163	1.64377e-09	7.66362e-08	0	0	6.81255	137.792	PSMD11;THY1;PSMA7;PSMA5;PSMA6;PSMB7;PSMA3;PSMC5;PSMB5;PSMC6;PSMA1;PSMA2;PSMB3;PSMC4;PSMC1;PSMC2;PAK2;SKP1
positive regulation of translation (GO:0045727)	13/78	1.97944e-09	9.02795e-08	0	0	10.8678	217.795	KHDRBS1;YTHDF1;YTHDF3;FMR1;CIRBP;EEF2;ELAVL1;FXR1;HABP4;HNRNPD;EIF3E;RPL26;EIF3C
transmembrane transport (GO:0055085)	27/378	2.89072e-09	1.29037e-07	0	0	4.28546	84.2597	GABRB3;GABRB2;GABRB1;TTYH3;PSMD11;NEDD4L;PSMA7;PSMB7;PSMB5;PDZD11;PSMB3;ANXA6;GABRA1;ATP6V1G1;GABRA3;ATP2B1;EIF2S1;PSMA5;PSMA6;PSMA3;PSMC5;PSMC6;PSMA1;PSMA2;PSMC4;PSMC1;PSMC2
RNA metabolic process (GO:0016070)	19/191	3.37745e-09	1.47623e-07	0	0	6.0709	118.42	EIF4A2;DDX17;EIF4A1;DDX6;DDX5;DDX1;CELF2;ELAVL4;SND1;HNRNPL;SYNCRIP;ATXN2;HNRNPK;HNRNPH1;DHX36;HNRNPA2B1;HNRNPD;HNRNPH2;HNRNPA0
cellular response to tumor necrosis factor (GO:0071356)	19/194	4.38038e-09	1.87552e-07	0	0	5.96591	114.821	PSMD11;DAB2IP;PSMA7;PSMA5;PSMA6;PSMB7;PSMA3;PSMC5;PSMB5;PSMC6;PSMA1;PSMA2;PSMB3;PSMC4;TRAF3;PSMC1;PSMC2;RPS3;INPP5K
Fc-epsilon receptor signaling pathway (GO:0038095)	18/182	9.62805e-09	4.03993e-07	0	0	6.01742	111.073	PSMD11;PSMA7;PSMA5;PSMA6;PSMB7;PSMA3;PSMC5;PSMB5;PSMC6;PSMA1;PSMA2;PSMB3;PSMC4;PSMC1;PSMC2;HRAS;PAK2;SKP1
Fc receptor signaling pathway (GO:0038093)	18/183	1.04989e-08	4.31896e-07	0	0	5.98064	109.876	PSMD11;PSMA7;PSMA5;PSMA6;PSMB7;PSMA3;PSMC5;PSMB5;PSMC6;PSMA1;PSMA2;PSMB3;PSMC4;PSMC1;PSMC2;HRAS;PAK2;SKP1
positive regulation of cellular protein metabolic process (GO:0032270)	13/91	1.38338e-08	5.58142e-07	0	0	9.05046	163.779	HSP90AA1;YTHDF1;YTHDF3;FMR1;CIRBP;EEF2;ELAVL1;FXR1;HNRNPD;VPS35;EIF3E;RPL26;EIF3C
positive regulation of cellular amide metabolic process (GO:0034250)	22586	1.4873e-08	5.88748e-07	0	0	11.8976	214.439	FXR1;YTHDF1;YTHDF3;FMR1;CIRBP;HNRNPD;EIF3E;RPL26;EEF2;EIF3C;ELAVL1
non-canonical Wnt signaling pathway (GO:0035567)	15/127	1.52359e-08	5.91942e-07	0	0	7.3006	131.408	PSMD11;PSMA7;PSMA5;PSMA6;PSMB7;PSMA3;PSMC5;PSMB5;PSMC6;PSMA1;PSMA2;PSMB3;PSMC4;PSMC1;PSMC2
protein deubiquitination (GO:0016579)	21/257	1.71886e-08	6.55667e-07	0	0	4.9019	87.6412	USP47;PSMD11;USP10;USP11;BRCC3;PSMA7;SNX3;PSMA5;PSMA6;PSMB7;PSMA3;PSMC5;PSMB5;PSMC6;PSMA1;PSMA2;PSMB3;PSMC4;TRAF3;PSMC1;PSMC2
regulation of translation (GO:0006417)	19/213	2.0365e-08	7.62959e-07	0	0	5.37636	95.2124	EIF4A2;DDX6;YTHDF1;YTHDF3;FMR1;DDX1;CIRBP;EEF2;ELAVL1;FXR1;SYNCRIP;ILF3;ATXN2;HNRNPD;RPS3;ETF1;EIF3E;RPL26;EIF3C
mRNA splicing, via spliceosome (GO:0000398)	21/261	2.25083e-08	8.14181e-07	0	0	4.81921	84.8633	DDX17;PRMT5;DDX5;FUS;DDX1;SRSF1;CELF4;ELAVL1;HNRNPL;EFTUD2;SYNCRIP;HNRNPK;HNRNPH1;HNRNPA2B1;HNRNPD;SRSF2;SRSF3;HNRNPH2;SNRPE;SNRPB;HNRNPA0
protein modification by small protein removal (GO:0070646)	21/261	2.25083e-08	8.14181e-07	0	0	4.81921	84.8633	USP47;PSMD11;USP10;USP11;BRCC3;PSMA7;SNX3;PSMA5;PSMA6;PSMB7;PSMA3;PSMC5;PSMB5;PSMC6;PSMA1;PSMA2;PSMB3;PSMC4;TRAF3;PSMC1;PSMC2
positive regulation of cellular biosynthetic process (GO:0031328)	16/159	5.04384e-08	1.79356e-06	0	0	6.10652	102.605	HSP90AA1;YTHDF1;HSP90AB1;YTHDF3;FMR1;CIRBP;SORBS1;EEF2;ARPP19;ELAVL1;FXR1;HNRNPD;EIF3E;RPL26;EIF3C;HRAS
positive regulation of macromolecule biosynthetic process (GO:0010557)	15/142	6.93588e-08	2.42525e-06	0	0	6.43338	106.048	YTHDF1;YTHDF3;FMR1;CIRBP;SORBS1;EEF2;ELAVL1;FXR1;NAMPT;HNRNPD;EIF3E;RPL26;EIF3C;HRAS;RAB3GAP1
protein polyubiquitination (GO:0000209)	21/283	9.05321e-08	3.11371e-06	0	0	4.40954	71.5119	PSMD11;FBXO2;NEDD4L;LNPEP;PSMA7;RBX1;PSMA5;PSMA6;PSMB7;PSMA3;PSMC5;PSMB5;PSMC6;PSMA1;PSMA2;PSMB3;PSMC4;PSMC1;PSMC2;TPP2;SKP1
positive regulation of RNA polymerase II transcriptional preinitiation complex assembly (GO:0045899)	44324	1.1747e-07	3.97503e-06	0	0	88.8768	1418.21	PSMC5;PSMC6;PSMC4;PSMC1;PSMC2
regulation of protein catabolic process (GO:0042176)	33573	1.2458e-07	4.11033e-06	0	0	8.22525	130.768	EEF1A1;DDB1;SNX3;CDKN1B;LRP1;EEF1A2;DAB2IP;NEDD4L;PIN1;PHB;SIRT2;RAB7A
ubiquitin-dependent protein catabolic process (GO:0006511)	23/341	1.25387e-07	4.11033e-06	0	0	3.99018	63.4114	PSMD11;CSNK1A1;NEDD4L;SIRT2;PSMA7;RBX1;DDB1;PSMA5;BAG6;PSMA6;PSMB7;PSMA3;PSMC5;PSMB5;PSMC6;PSMA1;PSMA2;PSMB3;PSMC4;PSMC1;PSMC2;SQSTM1;SKP1
RNA processing (GO:0006396)	17/193	1.36869e-07	4.4177e-06	0	0	5.2775	83.4069	DDX17;CELF2;SRSF1;ELAVL4;HNRNPL;EFTUD2;SYNCRIP;HNRNPK;HNRNPH1;KHSRP;DHX36;HNRNPA2B1;HNRNPD;SRSF2;TARDBP;SNRPB;HNRNPA0
glutamate receptor signaling pathway (GO:0007215)	13363	2.60332e-07	8.27542e-06	0	0	15.3417	232.6	HOMER1;HOMER2;FMR1;GPRIN1;GNAQ;GRIN2B;GRM1;GRIA3
antigen receptor-mediated signaling pathway (GO:0050851)	19/257	3.95748e-07	1.23922e-05	0	0	4.37249	64.4614	PSMD11;PLEKHA1;THY1;PSMA7;PSMA5;PSMA6;PSMB7;PSMA3;PSMC5;PSMB5;PSMC6;PSMA1;PSMA2;PSMB3;PSMC4;PSMC1;PSMC2;PAK2;SKP1
positive regulation of synaptic transmission (GO:0050806)	24746	4.34932e-07	1.34189e-05	0	0	9.45822	138.545	MPP2;NLGN1;FMR1;GPRIN1;SQSTM1;SHANK3;GRIN2B;SHANK2;SHANK1;GRIN2D
gamma-aminobutyric acid signaling pathway (GO:0007214)	44366	8.93127e-07	2.71562e-05	0	0	24.6665	343.569	GABRB3;GABRB2;GABRA1;GABRB1;GABBR1;GABRA3
regulation of RNA polymerase II transcriptional preinitiation complex assembly (GO:0045898)	44327	9.25313e-07	2.7733e-05	0	0	44.4316	617.294	PSMC5;PSMC6;PSMC4;PSMC1;PSMC2
proteolysis involved in cellular protein catabolic process (GO:0051603)	34274	1.27302e-06	3.76168e-05	0	0	7.24279	98.3145	DDB1;PSMA5;BAG6;PSMA6;PSMB7;PSMA3;PSMB5;PSMA1;PSMA2;PSMB3;PSMA7
long-term synaptic potentiation (GO:0060291)	44368	1.73072e-06	5.04314e-05	0	0	21.3755	283.588	MPP2;GRIN2B;SHANK3;SHANK2;GRIN2D;SHANK1
chemical synaptic transmission, postsynaptic (GO:0099565)	12236	2.08634e-06	5.91504e-05	0	0	14.4186	188.596	MPP2;GABRA1;GPRIN1;GABRA3;GRIN2B;RAB3GAP1;GRIN2D
regulation of postsynaptic membrane potential (GO:0060078)	12236	2.08634e-06	5.91504e-05	0	0	14.4186	188.596	MPP2;GABRA1;GPRIN1;GABRA3;GRIN2B;RAB3GAP1;GRIN2D
RNA splicing, via transesterification reactions with bulged adenosine as nucleophile (GO:0000377)	17/236	2.31391e-06	6.47279e-05	0	0	4.2319	54.9156	DDX5;FUS;SRSF1;ELAVL1;HNRNPL;EFTUD2;SYNCRIP;HNRNPK;HNRNPH1;HNRNPA2B1;HNRNPD;SRSF2;SRSF3;HNRNPH2;SNRPE;SNRPB;HNRNPA0
neuron projection morphogenesis (GO:0048812)	14/163	2.36583e-06	6.53095e-05	0	0	5.0979	66.0402	FARP1;CNTNAP1;NLGN1;OMG;DAB2IP;ALCAM;MAP2;MAP1A;EPB41L3;CPNE1;NEFH;SHANK3;SHANK2;SHANK1
post-translational protein modification (GO:0043687)	21/357	3.97851e-06	0.000108402	0	0	3.42525	42.5916	PSMD11;FBXO2;PSMA7;RAB11B;RBX1;DDB1;PSMA5;PSMA6;PSMB7;PSMA3;PSMC5;VCAN;PSMB5;PSMC6;PSMA1;PSMA2;PSMB3;PSMC4;PSMC1;PSMC2;SKP1
mRNA processing (GO:0006397)	18/283	6.74868e-06	0.000181522	0	0	3.70466	44.1083	DDX5;FUS;SRSF1;ELAVL4;ELAVL1;HNRNPL;EFTUD2;SYNCRIP;HNRNPK;HNRNPH1;HNRNPA2B1;HNRNPD;SRSF2;SRSF3;HNRNPH2;SNRPE;SNRPB;HNRNPA0
excitatory synapse assembly (GO:1904861)	44294	7.85403e-06	0.000208579	0	0	53.1789	625.09	NLGN1;SHANK3;SHANK2;SHANK1
positive regulation of transcription initiation from RNA polymerase II promoter (GO:0060261)	44333	1.12999e-05	0.000296341	0	0	22.209	252.977	PSMC5;PSMC6;PSMC4;PSMC1;PSMC2
ubiquitin-dependent ERAD pathway (GO:0030433)	21398	1.15338e-05	0.00029874	0	0	8.5817	97.5759	BAG6;PSMC5;PSMC6;PSMC4;PSMC1;PSMC2;SEC61B;UBE2J1
postsynaptic density organization (GO:0097106)	44295	1.39291e-05	0.000356382	0	0	42.5409	475.673	NLGN1;SHANK3;SHANK2;SHANK1
neuron projection development (GO:0031175)	13/167	1.57752e-05	0.00039875	0	0	4.56618	50.4886	CNTNAP1;NLGN1;DAB2IP;MAP2;GPRIN1;EPB41L3;MAP4;ATXN10;NEFH;SHANK3;HDGFL3;SHANK2;SHANK1
nucleic acid metabolic process (GO:0090304)	29465	1.78997e-05	0.000447066	0	0	6.81025	74.4409	HNRNPL;ATXN2;HNRNPK;HNRNPH1;DDX1;HNRNPA2B1;HNRNPD;HNRNPH2;HNRNPA0
regulation of translational initiation (GO:0006446)	22859	1.90675e-05	0.000470631	0	0	7.94439	86.3359	EIF4A2;KHDRBS1;YTHDF1;YTHDF3;FMR1;DDX1;HABP4;EIF3E
regulation of dendritic spine development (GO:0060998)	11475	2.00588e-05	0.000489342	0	0	12.8187	138.658	FXR1;NLGN1;FMR1;SHANK3;SHANK2;SHANK1
excitatory postsynaptic potential (GO:0060079)	44335	2.0591e-05	0.000490909	0	0	19.0344	205.393	MPP2;GPRIN1;GRIN2B;RAB3GAP1;GRIN2D
positive regulation of excitatory postsynaptic potential (GO:2000463)	44335	2.0591e-05	0.000490909	0	0	19.0344	205.393	NLGN1;GPRIN1;SHANK3;SHANK2;SHANK1
RNA secondary structure unwinding (GO:0010501)	16984	2.12233e-05	0.000500297	0	0	9.606	103.364	EIF4A2;DDX17;DDX6;EIF4A1;DDX5;DDX1;DHX36
negative regulation of dephosphorylation (GO:0035305)	23224	2.14899e-05	0.000500954	0	0	7.79955	83.829	FARP1;CNST;DLG3;LMTK3;INPP5K;ELFN2;ELFN1;ARPP19
positive regulation of dendrite development (GO:1900006)	11841	2.43023e-05	0.000560289	0	0	12.3251	130.953	NLGN1;FMR1;DAB2IP;SHANK3;SHANK2;SHANK1
positive regulation of dendritic spine development (GO:0060999)	44336	2.70361e-05	0.000616541	0	0	17.7645	186.853	NLGN1;FMR1;SHANK3;SHANK2;SHANK1
chemical synaptic transmission (GO:0007268)	17/289	3.30684e-05	0.000745994	0	0	3.398	35.0569	GABRB3;GRIA1;GABRB2;GABRA1;GABRB1;SLC12A5;HOMER1;GABRA3;GAD2;AKAP5;GRIN2B;GRM1;GRIN2D;DLG3;GPRIN1;NTSR1;GRIA3
ribonucleoprotein complex assembly (GO:0022618)	12/156	3.75222e-05	0.000837463	0	0	4.49746	45.8317	ATXN2L;DDX6;PRMT5;ATXN2;HSP90AA1;HSP90AB1;DDX1;CELF2;SRSF1;CIRBP;SNRPE;SNRPB
nervous system development (GO:0007399)	22/455	4.9563e-05	0.00109456	0	0	2.77839	27.5401	IGSF8;FARP1;PRPS1;NLGN1;RBFOX3;GSS;FMR1;LSAMP;ELP3;KALRN;FXR1;AHI1;VCAN;DPYSL4;DLG3;PTPRZ1;ERBB4;ATXN10;LY6H;SHANK3;SHANK2;SHANK1
alternative mRNA splicing, via spliceosome (GO:0000380)	44298	5.23426e-05	0.0011439	0	0	26.584	262.057	DDX17;DDX5;SRSF1;CELF4
cytokine-mediated signaling pathway (GO:0019221)	27/633	6.22193e-05	0.00134573	0	0	2.44934	23.7214	PSMD11;PSMA7;PSMB7;PSMB5;HNRNPDL;PTPRZ1;PSMB3;PAK2;SKP1;HSP90AA1;RBX1;PSMA5;PSMA6;PSMA3;PSMC5;PSMC6;PSMA1;PSMA2;PSMC4;TRAF3;CAPZA1;PSMC1;CANX;HNRNPA2B1;PSMC2;CNTN1;SQSTM1
regulation of alternative mRNA splicing, via spliceosome (GO:0000381)	14397	7.83823e-05	0.00167738	0	0	9.70721	91.7711	DDX17;HNRNPL;DDX5;RBFOX3;FMR1;CELF4
brain development (GO:0007420)	10/119	7.91518e-05	0.00167738	0	0	4.9329	46.587	BAG6;GPRIN1;RAB18;GRIN2B;SHANK3;SHANK2;PAFAH1B2;RAB3GAP1;GRIN2D;SHANK1
mRNA metabolic process (GO:0016071)	35674	8.35636e-05	0.00175316	0	0	5.48985	51.5492	EFTUD2;DDX5;SRSF1;HNRNPA2B1;SRSF2;ELAVL4;SNRPE;SNRPB;HNRNPA0
modulation of excitatory postsynaptic potential (GO:0098815)	44341	8.58067e-05	0.0017824	0	0	13.32	124.72	NLGN1;GPRIN1;SHANK3;SHANK2;SHANK1
ERAD pathway (GO:0036503)	28338	9.30945e-05	0.00191483	0	0	6.21259	57.6646	BAG6;PSMC5;PSMC6;PSMC4;PSMC1;PSMC2;SEC61B;UBE2J1
retrograde transport, endosome to plasma membrane (GO:1990126)	44300	0.000102762	0.00209316	0	0	21.265	195.279	VPS29;SNX27;VPS35;RAB11B
neutrophil degranulation (GO:0043312)	22/479	0.000104947	0.0021171	0	0	2.62919	24.0888	HSP90AA1;PDXK;PSMD11;HSP90AB1;PTGES2;COPB1;IQGAP2;TUBB4B;EEF2;PSMA5;EEF1A1;PSMB7;NCSTN;RAP2B;PSMA2;LRRC7;PSMC2;CPNE1;RAB18;PAFAH1B2;ARL8A;RAB7A
neutrophil activation involved in immune response (GO:0002283)	22/483	0.000118241	0.00236257	0	0	2.60583	23.564	HSP90AA1;PDXK;PSMD11;HSP90AB1;PTGES2;COPB1;IQGAP2;TUBB4B;EEF2;PSMA5;EEF1A1;PSMB7;NCSTN;RAP2B;PSMA2;LRRC7;PSMC2;CPNE1;RAB18;PAFAH1B2;ARL8A;RAB7A
regulation of mRNA splicing, via spliceosome (GO:0048024)	22098	0.000122448	0.00239776	0	0	7.06351	63.6269	DDX17;HNRNPL;DDX5;RBFOX3;FMR1;CELF4;SRSF3
positive regulation of RNA binding (GO:1905216)	44261	0.000123431	0.00239776	0	0	53.0378	477.332	FMR1;EIF3E;EIF3C
intermediate filament bundle assembly (GO:0045110)	44261	0.000123431	0.00239776	0	0	53.0378	477.332	NEFL;NEFM;NEFH
neutrophil mediated immunity (GO:0002446)	22/487	0.00013301	0.00254431	0	0	2.58288	23.0524	HSP90AA1;PDXK;PSMD11;HSP90AB1;PTGES2;COPB1;IQGAP2;TUBB4B;EEF2;PSMA5;EEF1A1;PSMB7;NCSTN;RAP2B;PSMA2;LRRC7;PSMC2;CPNE1;RAB18;PAFAH1B2;ARL8A;RAB7A
positive regulation of protein catabolic process (GO:0045732)	29799	0.0001334	0.00254431	0	0	5.87097	52.3817	DDB1;HSP90AA1;CDKN1B;LRP1;DAB2IP;NEDD4L;VPS35;RAB7A
positive regulation of protein localization to plasma membrane (GO:1903078)	15858	0.000137555	0.00259991	0	0	8.65601	76.9648	CNST;LRP1;ITGA3;AKAP5;SORBS1;SQSTM1
negative regulation of protein modification process (GO:0031400)	23193	0.000167225	0.00313248	0	0	6.68408	58.1259	PRNP;FKBP8;DAB2IP;INPP5K;TARDBP;ARPP19;CORO1C
anterograde trans-synaptic signaling (GO:0098916)	14/240	0.000176829	0.00328307	0	0	3.34772	28.9254	GABRB3;GRIA1;GABRB2;GABRA1;GABRB1;SLC12A5;HOMER1;GABRA3;GAD2;AKAP5;GRIN2B;GRM1;DLG3;NTSR1
positive regulation of protein localization to cell periphery (GO:1904377)	16954	0.00020164	0.00371088	0	0	8.00559	68.1198	LRP1;ITGA3;AKAP5;SORBS1;SQSTM1;GNAI1
postsynaptic density assembly (GO:0097107)	44262	0.000213015	0.00372727	0	0	39.7764	336.275	SHANK3;SHANK2;SHANK1
regulation of dendritic spine maintenance (GO:1902950)	44262	0.000213015	0.00372727	0	0	39.7764	336.275	PRNP;VPS35;GRIN2B
positive regulation of mRNA binding (GO:1902416)	44262	0.000213015	0.00372727	0	0	39.7764	336.275	FMR1;EIF3E;EIF3C
cellular response to histamine (GO:0071420)	44262	0.000213015	0.00372727	0	0	39.7764	336.275	GABRB3;GABRB2;GABRB1
excitatory chemical synaptic transmission (GO:0098976)	44262	0.000213015	0.00372727	0	0	39.7764	336.275	GPRIN1;GRIN2B;GRIN2D
negative regulation of cell morphogenesis involved in differentiation (GO:0010771)	44346	0.00021319	0.00372727	0	0	10.6533	90.0555	OMG;THY1;ACTN4;CORO1C;YWHAH
protein ubiquitination (GO:0016567)	22/506	0.000227883	0.00395123	0	0	2.47902	20.7907	PSMD11;FBXO2;NEDD4L;LNPEP;PSMA7;RBX1;DDB1;PSMA5;PSMA6;PSMB7;PSMA3;PSMC5;PSMB5;PSMC6;PSMA1;PSMA2;PSMB3;PSMC4;PSMC1;PSMC2;TPP2;SKP1
central nervous system development (GO:0007417)	13/217	0.000230837	0.00396963	0	0	3.43817	28.7905	FMR1;ELP3;GRIN2B;GRIN2D;FXR1;BAG6;AHI1;VCAN;PTPRZ1;GPRIN1;RAB18;PAFAH1B2;RAB3GAP1
negative regulation of cellular protein metabolic process (GO:0032269)	32721	0.000257461	0.00439149	0	0	5.28896	43.7113	FXR1;BAG6;SYNCRIP;ILF3;CAMK2N1;FMR1;RPS3;DAB2IP
cellular protein modification process (GO:0006464)	35/1001	0.000279362	0.00472662	0	0	2.00036	16.369	PSMD11;RPN1;PSMA7;TIMM50;PSMB7;PSMB5;PTPRZ1;PSMB3;PAK2;SKP1;CSNK1A1;FBXO2;ELP1;LMTK2;CDC42BPA;RAB11B;PPP1CA;RBX1;DDB1;PSMA5;PSMA6;PTPRE;PSMA3;PSMC5;ILF3;VCAN;PSMC6;PRKAR1B;PSMA1;PSMA2;PSMC4;PSMC1;PSMC2;PGP;PTPN5
dendrite morphogenesis (GO:0048813)	11810	0.000292188	0.00490408	0	0	9.86312	80.2672	FARP1;MAP2;SHANK3;SHANK2;SHANK1
positive regulation of synaptic transmission, glutamatergic (GO:0051968)	44304	0.000296118	0.0049306	0	0	15.1862	123.384	NLGN1;SHANK3;SHANK2;SHANK1
mRNA stabilization (GO:0048255)	12175	0.000339143	0.00560254	0	0	9.51038	75.9793	SYNCRIP;CIRBP;TARDBP;ELAVL1;HNRNPA0
neuron development (GO:0048666)	10/144	0.000378858	0.00620972	0	0	4.00744	31.572	FXR1;NTRK2;NLGN1;ATP8A2;MAP2;FMR1;GPRIN1;MAP4;ATXN10;HDGFL3
response to metal ion (GO:0010038)	26481	0.00038583	0.00626403	0	0	5.75595	45.2424	AHCYL1;HOMER1;ALG2;NEDD4L;SLC25A12;GPHN;PPP1CA
endosomal transport (GO:0016197)	13/229	0.000388143	0.00626403	0	0	3.24515	25.4879	VPS29;SORT1;M6PR;LMTK2;HOOK3;RAB11B;EEA1;SNX27;VPS41;VPS35;SQSTM1;VTI1B;RAB7A
endoplasmic reticulum organization (GO:0007029)	12540	0.000391591	0.00627143	0	0	9.18197	72.0353	LMAN2L;VAPB;LMAN2;ATL2;RAB18
chloride transport (GO:0006821)	26846	0.000420022	0.00667581	0	0	5.66845	44.0733	GABRB3;GABRB2;GABRA1;GABRB1;TTYH3;SLC12A5;GABRA3
protein transport (GO:0015031)	16/326	0.000443234	0.00699177	0	0	2.79274	21.5639	VPS29;STX12;ATP6V1G1;RABGAP1L;RABGAP1;TFRC;LMAN2L;LRP1;LMTK2;ZDHHC17;RAB11B;SNX27;RAB18;VPS35;RAB7A;YWHAH
positive regulation of telomerase activity (GO:0051973)	12905	0.000449935	0.00704451	0	0	8.87545	68.3978	HSP90AA1;HSP90AB1;HNRNPA2B1;HNRNPD;CCT4
negative regulation of phosphorylation (GO:0042326)	27576	0.000495659	0.00770291	0	0	5.50117	41.8618	PRNP;CDKN1B;FKBP8;DAB2IP;INPP5K;TARDBP;CORO1C
negative regulation of protein phosphorylation (GO:0001933)	11/178	0.000531555	0.00820001	0	0	3.54087	26.6971	PRNP;CAMK2N1;GNAQ;FKBP8;DAB2IP;INPP5K;THY1;TARDBP;PAK2;SIRT2;CORO1C
positive regulation of translational initiation (GO:0045948)	44307	0.000554124	0.00848578	0	0	12.5044	93.7594	KHDRBS1;YTHDF1;YTHDF3;HABP4
protein stabilization (GO:0050821)	10/152	0.000580628	0.00882722	0	0	3.78012	28.1672	BAG6;STX12;HSP90AA1;HSP90AB1;GNAQ;ZNF207;PIN1;PHB;CCT7;CCT4
regulation of dendrite development (GO:0050773)	13636	0.000585995	0.00884473	0	0	8.31989	61.9183	FXR1;FMR1;DAB2IP;NEDD4L;DBN1
positive regulation of gene expression (GO:0010628)	28/771	0.000640151	0.00959313	0	0	2.06274	15.169	DDX5;FMR1;PHB;ELAVL1;FXR1;TRIM28;CAMK2N1;ERBB4;HABP4;RPS3;INPP5K;UBAP2L;VPS35;YWHAH;DDX17;NTRK2;YTHDF1;YTHDF3;CNBP;CIRBP;EEF2;PSMC5;ILF3;FUBP1;HNRNPD;EIF3E;RPL26;EIF3C
positive regulation of cell death (GO:0010942)	20972	0.000657768	0.00971829	0	0	6.27536	45.9775	PRNP;CDKN1B;LRP1;PHB;EIF2S1;GRIN2B
chloride transmembrane transport (GO:1902476)	20972	0.000657768	0.00971829	0	0	6.27536	45.9775	GABRB3;GABRB2;GABRA1;GABRB1;SLC12A5;GABRA3
early endosome to late endosome transport (GO:0045022)	44308	0.000667367	0.00979116	0	0	11.8091	86.3501	EEA1;LMTK2;HOOK3;RAB7A
response to calcium ion (GO:0051592)	29037	0.000679356	0.00989784	0	0	5.19448	37.8905	NLGN1;AHCYL1;HOMER1;HPCA;CPNE1;ALG2;SLC25A12
response to histamine (GO:0034776)	44265	0.000700493	0.0101354	0	0	22.7259	165.074	GABRB3;GABRB2;GABRB1
negative regulation of protein catabolic process (GO:0042177)	14366	0.00075078	0.0107886	0	0	7.82968	56.3299	SNX3;DAB2IP;PIN1;PHB;SIRT2
gene expression (GO:0010467)	18/411	0.000765729	0.0109286	0	0	2.48154	17.8043	DDX17;CELF2;SRSF1;ELAVL4;RPS3A;HNRNPL;EEF1A1;SYNCRIP;HNRNPK;HNRNPH1;DHX36;HNRNPA2B1;EEF1A2;HNRNPD;RPS3;SRSF2;SRSF3;RPL26
vesicle-mediated transport between endosomal compartments (GO:0098927)	44309	0.000796069	0.0112848	0	0	11.187	79.8284	EEA1;LMTK2;HOOK3;RAB7A
protein localization to membrane (GO:0072657)	10/160	0.000864136	0.0121675	0	0	3.57704	25.2317	DPP6;NLGN1;DLG3;PDZD11;EPB41L3;KCNIP4;INPP5K;THY1;SHANK3;RAB11B
dendritic spine organization (GO:0097061)	44310	0.000941343	0.0126936	0	0	10.6271	74.0518	PRNP;SHANK3;SHANK2;SHANK1
regulation of AMPA receptor activity (GO:2000311)	44310	0.000941343	0.0126936	0	0	10.6271	74.0518	NLGN1;SHANK3;SHANK2;SHANK1
negative regulation of hydrolase activity (GO:0051346)	8/108	0.000945466	0.0126936	0	0	4.27989	29.8044	FARP1;CNST;DLG3;LMTK3;DAB2IP;ELFN2;ELFN1;HRAS
brain morphogenesis (GO:0048854)	44266	0.000949899	0.0126936	0	0	19.8841	138.377	SHANK3;SHANK2;SHANK1
stress granule assembly (GO:0034063)	44266	0.000949899	0.0126936	0	0	19.8841	138.377	ATXN2L;ATXN2;CIRBP
transcytosis (GO:0045056)	2021-03-11	0.000949899	0.0126936	0	0	19.8841	138.377	LRP1;VPS35;RAB11B
synaptic transmission, GABAergic (GO:0051932)	2021-03-11	0.000949899	0.0126936	0	0	19.8841	138.377	GABRB2;GABRA1;GABRA3
glutathione biosynthetic process (GO:0006750)	44266	0.000949899	0.0126936	0	0	19.8841	138.377	GCLC;GSS;HAGH
negative regulation of protein kinase activity (GO:0006469)	8/109	0.00100412	0.0133331	0	0	4.2373	29.2528	CDKN1B;CAMK2N1;GNAQ;DAB2IP;INPP5K;THY1;PAK2;CORO1C
positive regulation of catabolic process (GO:0009896)	22798	0.00103075	0.0136007	0	0	5.7136	39.2951	DDB1;CDKN1B;LRP1;DAB2IP;NEDD4L;RAB7A
ion transport (GO:0006811)	14/289	0.00112514	0.0147534	0	0	2.74427	18.6332	GABRB3;GABRB2;GABRA1;ATP6V1G1;GABRB1;TTYH3;SLC24A3;SLC12A5;GABRA3;NEDD4L;ATP2B1;PDZD11;GPRIN1;ANXA6
negative regulation of protein metabolic process (GO:0051248)	15827	0.00118109	0.0153908	0	0	7.00408	47.2167	SNX3;PRNP;PIN1;PHB;SIRT2
inorganic anion transmembrane transport (GO:0098661)	23529	0.00121856	0.0157811	0	0	5.51602	37.013	GABRB3;GABRB2;GABRA1;GABRB1;SLC12A5;GABRA3
nonribosomal peptide biosynthetic process (GO:0019184)	44267	0.00124909	0.0160772	0	0	17.6739	118.156	GCLC;GSS;HAGH
negative regulation of translation (GO:0017148)	1988-07-01	0.00129009	0.0165037	0	0	4.61519	30.7051	FXR1;SYNCRIP;ILF3;YTHDF3;FMR1;RPS3;EIF3E
regulation of dendrite morphogenesis (GO:0048814)	16193	0.0013124	0.0166874	0	0	6.82414	45.2842	FXR1;FMR1;NEDD4L;SHANK3;YWHAH
translation (GO:0006412)	12/232	0.00144097	0.0182118	0	0	2.93231	19.1845	EFTUD2;EEF1A1;EEF1G;AIMP2;PPA2;EEF1A2;RPS3;RPS3A;ETF1;RPL26;EEF2;ZC3H15
regulation of synaptic transmission, glutamatergic (GO:0051966)	1945-05-01	0.00145419	0.0182688	0	0	6.65319	43.4673	NLGN1;SHANK3;GRM1;SHANK2;SHANK1
regulation of protein localization to cell surface (GO:2000008)	2021-04-27	0.00148774	0.018579	0	0	9.23954	60.154	HSP90AB1;NEDD4L;RAB11FIP5;RAB11B
regulation of protein localization to plasma membrane (GO:1903076)	24624	0.00154804	0.0192176	0	0	5.24394	33.9323	LRP1;ITGA3;AKAP5;SORBS1;SQSTM1;VTI1B
protein methylation (GO:0006479)	16923	0.00160694	0.0198316	0	0	6.49059	41.7567	EEF1A1;PRMT5;ETF1;EEF2;SNRPB
negative regulation of phosphatase activity (GO:0010923)	1968-06-01	0.00167166	0.0202984	0	0	5.15909	32.9869	FARP1;CNST;DLG3;LMTK3;ELFN2;ELFN1
plasma membrane bounded cell projection organization (GO:0120036)	8/118	0.0016738	0.0202984	0	0	3.88882	24.8599	NLGN1;PLEKHA1;MAP2;GPRIN1;TPM1;MAP4;ATXN10;HDGFL3
cytosolic transport (GO:0016482)	8/118	0.0016738	0.0202984	0	0	3.88882	24.8599	EEA1;VPS29;SORT1;LMTK2;VPS35;HOOK3;VTI1B;RAB7A
vesicle-mediated transport (GO:0016192)	17/410	0.00190645	0.0229869	0	0	2.33709	14.6361	VPS29;STX12;LRP1;SORT1;M6PR;LMTK2;HOOK3;KALRN;NCALD;RAB11B;EEA1;AHI1;VPS41;CPNE1;VPS35;VTI1B;RAB7A
endosome to lysosome transport (GO:0008333)	17654	0.00194734	0.0233073	0	0	6.18807	38.6216	SORT1;VPS41;M6PR;HOOK3;RAB7A
protein alkylation (GO:0008213)	44315	0.00195523	0.0233073	0	0	8.49951	53.0135	EEF1A1;ETF1;EEF2;SNRPB
regulation of synapse organization (GO:0050807)	44269	0.0020102	0.023695	0	0	14.459	89.7832	FXR1;FMR1;VPS35
positive regulation of protein localization to membrane (GO:1905477)	34881	0.00201035	0.023695	0	0	4.24655	26.3687	PRNP;LRP1;ITGA3;AKAP5;SORBS1;SQSTM1;YWHAH
regulation of cation channel activity (GO:2001257)	26085	0.00208778	0.0244701	0	0	4.92023	30.3659	NLGN1;HOMER1;HPCA;SHANK3;SHANK2;SHANK1
positive regulation of protein metabolic process (GO:0051247)	35247	0.0021345	0.0247586	0	0	4.19862	25.8195	DDB1;CDKN1B;HNRNPK;LRP1;DAB2IP;NEDD4L;RAB7A
positive regulation of response to DNA damage stimulus (GO:2001022)	18019	0.00213599	0.0247586	0	0	6.04712	37.1827	DDX5;TRIM28;FMR1;RPS3;BRCC3
lysosomal transport (GO:0007041)	26451	0.0022425	0.0255694	0	0	4.84543	29.5579	SORT1;VPS41;M6PR;VPS35;HOOK3;RAB7A
regulation of neuron death (GO:1901214)	26451	0.0022425	0.0255694	0	0	4.84543	29.5579	PRNP;RILPL1;SIGMAR1;VPS35;EIF2S1;GRIN2B
regulation of phosphatase activity (GO:0010921)	26451	0.0022425	0.0255694	0	0	4.84543	29.5579	FARP1;CNST;DLG3;LMTK3;ELFN2;ELFN1
positive regulation of proteasomal protein catabolic process (GO:1901800)	26816	0.00240571	0.027282	0	0	4.77287	28.78	BAG6;CSNK1A1;FMR1;DAB2IP;SIRT2;RBX1
G-protein coupled glutamate receptor signaling pathway (GO:0007216)	44270	0.00247824	0.0279535	0	0	13.2534	79.523	HOMER1;HOMER2;GRM1
regulation of protein tyrosine kinase activity (GO:0061097)	11414	0.00251553	0.0280722	0	0	7.86912	47.0988	PRNP;RAP2B;DLG3;THY1
vesicle-mediated transport to the plasma membrane (GO:0098876)	11414	0.00251553	0.0280722	0	0	7.86912	47.0988	VPS29;SNX27;VPS35;RAB11B
negative regulation of cellular amide metabolic process (GO:0034249)	27546	0.00275873	0.0306234	0	0	4.63405	27.3084	FXR1;SYNCRIP;PRNP;ILF3;FMR1;RPS3
ion transmembrane transport (GO:0034220)	11/219	0.00281608	0.0310954	0	0	2.83692	16.6596	GABRB3;GABRB2;GABRA1;ATP6V1G1;GABRB1;TTYH3;PDZD11;GABRA3;ANXA6;NEDD4L;ATP2B1
regulation of glutamate receptor signaling pathway (GO:1900449)	1932-04-01	0.00283315	0.0311201	0	0	7.58769	44.5122	NLGN1;SHANK3;SHANK2;SHANK1
postsynaptic membrane organization (GO:0001941)	44271	0.00300828	0.032366	0	0	12.2333	71.0311	NLGN1;SHANK3;GPHN
negative regulation of translational initiation (GO:0045947)	44271	0.00300828	0.032366	0	0	12.2333	71.0311	FMR1;EIF3E;EIF2S1
dendritic spine morphogenesis (GO:0060997)	44271	0.00300828	0.032366	0	0	12.2333	71.0311	SHANK3;SHANK2;SHANK1
ruffle organization (GO:0031529)	44271	0.00300828	0.032366	0	0	12.2333	71.0311	PLEKHA1;TPM1;INPP5K
regulation of neurotransmitter receptor activity (GO:0099601)	12145	0.00317715	0.0340085	0	0	7.32567	42.1356	NLGN1;SHANK3;SHANK2;SHANK1
transmembrane receptor protein tyrosine kinase signaling pathway (GO:0007169)	16/396	0.00330211	0.0351666	0	0	2.27003	12.9691	ACTR3;NTRK2;ATP6V1G1;HSP90AA1;SORT1;SORBS1;KALRN;GRIN2B;SIRT2;AHI1;NCSTN;HNRNPH1;ERBB4;GPRIN1;HRAS;PAK2
cellular protein localization (GO:0034613)	14/327	0.00350422	0.0371306	0	0	2.40636	13.6051	VPS29;STX12;RABGAP1L;CNTNAP1;RABGAP1;RAB11B;AHI1;SNX27;EPB41L3;RAB18;CNTN2;VPS35;RAB7A;YWHAH
regulation of cellular protein catabolic process (GO:1903362)	44272	0.00360283	0.0374195	0	0	11.3589	63.9055	HSP90AA1;DAB2IP;VPS35
RNA stabilization (GO:0043489)	44272	0.00360283	0.0374195	0	0	11.3589	63.9055	DHX36;CIRBP;ELAVL1
3'-UTR-mediated mRNA stabilization (GO:0070935)	44272	0.00360283	0.0374195	0	0	11.3589	63.9055	TARDBP;ELAVL1;HNRNPA0
regulation of synaptic vesicle exocytosis (GO:2000300)	44272	0.00360283	0.0374195	0	0	11.3589	63.9055	NLGN1;FMR1;RAB3GAP1
regulation of protein phosphorylation (GO:0001932)	12/261	0.0037961	0.0391862	0	0	2.58692	14.4189	PRNP;NTRK2;ERBB4;FMR1;DAB2IP;FKBP8;INPP5K;PIN1;TARDBP;HRAS;PAK2;CORO1C
RNA transport (GO:0050658)	29373	0.00381029	0.0391862	0	0	4.31983	24.0617	ATXN2;FMR1;SRSF1;HNRNPA2B1;SRSF2;SRSF3
organelle fusion (GO:0048284)	44273	0.00426417	0.0431184	0	0	10.6011	57.8555	EEA1;CHCHD3;OPA1
receptor localization to synapse (GO:0097120)	44273	0.00426417	0.0431184	0	0	10.6011	57.8555	NLGN1;DLG3;GPHN
modulation of chemical synaptic transmission (GO:0050804)	30103	0.00430477	0.0431184	0	0	4.20572	22.9129	GRIA1;NLGN1;PSMC5;FMR1;GRM1;GRIA3
ephrin receptor signaling pathway (GO:0048013)	30103	0.00430477	0.0431184	0	0	4.20572	22.9129	ACTR3;NCSTN;GPRIN1;HRAS;KALRN;GRIN2B
transferrin transport (GO:0033572)	13241	0.00437761	0.0431184	0	0	6.63787	36.052	ATP6V1G1;TFRC;LMTK2;RAB11B
calcium ion transmembrane import into cytosol (GO:0097553)	13241	0.00437761	0.0431184	0	0	6.63787	36.052	GPRIN1;ITPR1;GRIN2B;GRIN2D
ferric iron transport (GO:0015682)	1936-04-01	0.00437761	0.0431184	0	0	6.63787	36.052	ATP6V1G1;TFRC;LMTK2;RAB11B
regulation of cell morphogenesis involved in differentiation (GO:0010769)	13241	0.00437761	0.0431184	0	0	6.63787	36.052	FXR1;FMR1;NEDD4L;CORO1C
axonal transport (GO:0098930)	13241	0.00437761	0.0431184	0	0	6.63787	36.052	FXR1;OPA1;FMR1;NEFL
regulation of autophagy (GO:0010506)	10/203	0.00493518	0.047413	0	0	2.77395	14.7335	EEF1A1;ATP6V1G1;CAPNS1;EXOC7;USP10;EEF1A2;ITPR1;WDR6;VPS35;SIRT2
SCF complex assembly (GO:0010265)	44233	0.00495141	0.047413	0	0	26.4461	140.378	RBX1;SKP1
regulation of translational initiation in response to stress (GO:0043558)	2021-02-06	0.00495141	0.047413	0	0	26.4461	140.378	EIF2S1;PPP1CA
nucleobase metabolic process (GO:0009112)	44233	0.00495141	0.047413	0	0	26.4461	140.378	PRPS1;UCKL1
insulin secretion involved in cellular response to glucose stimulus (GO:0035773)	44233	0.00495141	0.047413	0	0	26.4461	140.378	RAB11FIP5;RAB11B
fructose 6-phosphate metabolic process (GO:0006002)	2021-02-06	0.00495141	0.047413	0	0	26.4461	140.378	GFPT1;PFKM
calcium ion transport into cytosol (GO:0060402)	44274	0.00499441	0.047413	0	0	9.93801	52.6658	GPRIN1;GRIN2B;GRIN2D
mitochondrial membrane organization (GO:0007006)	44274	0.00499441	0.047413	0	0	9.93801	52.6658	CHCHD3;OPA1;TIMM50
regulation of cellular amide metabolic process (GO:0034248)	13971	0.0053281	0.0503529	0	0	6.24677	32.7004	EEF1A1;DDX6;ATXN2;EEF1A2
positive regulation of signal transduction (GO:0009967)	10/206	0.00546199	0.0513868	0	0	2.73107	14.2287	NLGN1;HOMER1;GPRIN1;RPS3;DAB2IP;CNTN1;PHB;SHANK3;SHANK2;SHANK1
negative regulation of actin filament bundle assembly (GO:0032232)	44275	0.00579545	0.0540393	0	0	9.35294	48.174	INPP5K;SHANK3;SHANK1
positive regulation of gene silencing by miRNA (GO:2000637)	44275	0.00579545	0.0540393	0	0	9.35294	48.174	FXR1;DDX5;FMR1
synapse assembly (GO:0007416)	23132	0.00637227	0.0589599	0	0	4.58419	23.1768	FARP1;NLGN1;SHANK3;SHANK2;SHANK1
negative regulation of ERK1 and ERK2 cascade (GO:0070373)	14702	0.00640746	0.0589599	0	0	5.89913	29.7923	CAMK2N1;DAB2IP;PIN1;PHB
negative regulation of catabolic process (GO:0009895)	14702	0.00640746	0.0589599	0	0	5.89913	29.7923	SNX3;PIN1;PHB;SIRT2
positive regulation of endocytosis (GO:0045807)	1964-05-01	0.00680902	0.0616504	0	0	4.50626	22.484	TUB;HNRNPK;LRP1;LMAN2;NEDD4L
nucleic acid transport (GO:0050657)	44234	0.00684678	0.0616504	0	0	21.1558	105.44	ATXN2;HNRNPA2B1
negative regulation of dendrite morphogenesis (GO:0050774)	44234	0.00684678	0.0616504	0	0	21.1558	105.44	NLGN1;YWHAH
activation of signaling protein activity involved in unfolded protein response (GO:0006987)	2021-02-07	0.00684678	0.0616504	0	0	21.1558	105.44	VAPB;DAB2IP
forebrain neuron differentiation (GO:0021879)	2021-02-07	0.00684678	0.0616504	0	0	21.1558	105.44	ERBB4;SHANK3
DNA duplex unwinding (GO:0032508)	1941-04-01	0.00699769	0.062473	0	0	5.7394	28.4799	DDB1;PURA;DDX1;RBX1
spliceosomal complex assembly (GO:0000245)	1941-04-01	0.00699769	0.062473	0	0	5.7394	28.4799	CELF2;DDX1;SRSF1;SNRPE
negative regulation of kinase activity (GO:0033673)	33390	0.007132	0.0634023	0	0	3.75868	18.5798	CDKN1B;CAMK2N1;GNAQ;INPP5K;THY1;PAK2
regulation of ion transmembrane transporter activity (GO:0032412)	15432	0.00762273	0.0674789	0	0	5.58808	27.2509	AHCYL1;HOMER1;NEDD4L;YWHAH
negative regulation of protein serine/threonine kinase activity (GO:0071901)	1967-05-01	0.00824428	0.0723703	0	0	4.28756	20.5727	CDKN1B;PRKAR1B;PRKAR1A;DAB2IP;INPP5K
cellular response to UV (GO:0034644)	24593	0.00824428	0.0723703	0	0	4.28756	20.5727	DDB1;USP47;FMR1;RPL26;EIF2S1
viral process (GO:0016032)	10/220	0.00852661	0.0730413	0	0	2.54716	12.1361	VAPB;EIF3L;RPS3;EIF3G;NEDD4L;NUCKS1;RPS3A;RPL26;PAK2;RAB7A
cellular response to ammonium ion (GO:0071242)	44278	0.00863972	0.0730413	0	0	7.94878	37.7677	GABRB3;GABRB2;GABRB1
dephosphorylation (GO:0016311)	7/124	0.00868122	0.0730413	0	0	3.18925	15.1381	PTPRE;PTPRZ1;PGP;INPP5K;PTPN5;TIMM50;PPP1CA
termination of RNA polymerase II transcription (GO:0006369)	24959	0.00876592	0.0730413	0	0	4.21929	19.9863	SRSF1;SRSF2;SRSF3;SNRPE;SNRPB
positive regulation of transport (GO:0051050)	16163	0.00898052	0.0730413	0	0	5.30813	25.0156	LRP1;FMR1;NEDD4L;INPP5K
peptidyl-cysteine modification (GO:0018198)	44235	0.00901702	0.0730413	0	0	17.6289	83.0083	CHCHD4;TMX3
lipoprotein transport (GO:0042953)	2021-02-08	0.00901702	0.0730413	0	0	17.6289	83.0083	LRP1;ZDHHC17
regulation of chaperone-mediated autophagy (GO:1904714)	44235	0.00901702	0.0730413	0	0	17.6289	83.0083	EEF1A1;EEF1A2
positive regulation of protein localization to Cajal body (GO:1904871)	44235	0.00901702	0.0730413	0	0	17.6289	83.0083	CCT7;CCT4
negative regulation of activated T cell proliferation (GO:0046007)	44235	0.00901702	0.0730413	0	0	17.6289	83.0083	PRNP;PRKAR1A
Schwann cell development (GO:0014044)	2021-02-08	0.00901702	0.0730413	0	0	17.6289	83.0083	CNTNAP1;SIRT2
regulation of positive chemotaxis (GO:0050926)	2021-02-08	0.00901702	0.0730413	0	0	17.6289	83.0083	CNTN1;CDH13
regulation of store-operated calcium entry (GO:2001256)	2021-02-08	0.00901702	0.0730413	0	0	17.6289	83.0083	HOMER1;HOMER2
regulation of nitrogen compound metabolic process (GO:0051171)	2021-02-08	0.00901702	0.0730413	0	0	17.6289	83.0083	LRP1;CACYBP
regulation of cytoplasmic mRNA processing body assembly (GO:0010603)	44235	0.00901702	0.0730413	0	0	17.6289	83.0083	ATXN2L;ATXN2
peripheral nervous system axon ensheathment (GO:0032292)	2021-02-08	0.00901702	0.0730413	0	0	17.6289	83.0083	CNTNAP1;SIRT2
negative regulation of cAMP-dependent protein kinase activity (GO:2000480)	44235	0.00901702	0.0730413	0	0	17.6289	83.0083	PRKAR1B;PRKAR1A
regulation of protein localization to Cajal body (GO:1904869)	44235	0.00901702	0.0730413	0	0	17.6289	83.0083	CCT7;CCT4
regulation of long term synaptic depression (GO:1900452)	44235	0.00901702	0.0730413	0	0	17.6289	83.0083	FMR1;SHANK3
lipoprotein localization (GO:0044872)	44235	0.00901702	0.0730413	0	0	17.6289	83.0083	LRP1;ZDHHC17
receptor clustering (GO:0043113)	44279	0.00973949	0.0779903	0	0	7.56988	35.0604	NLGN1;DLG3;THY1
cellular modified amino acid biosynthetic process (GO:0042398)	44279	0.00973949	0.0779903	0	0	7.56988	35.0604	GCLC;GSS;HAGH
intrinsic apoptotic signaling pathway in response to endoplasmic reticulum stress (GO:0070059)	44279	0.00973949	0.0779903	0	0	7.56988	35.0604	BAG6;DAB2IP;ITPR1
negative regulation of programmed cell death (GO:0043069)	15/408	0.0100582	0.0802359	0	0	2.05062	9.43156	USP47;NTRK2;LMTK2;ASNS;RPS3A;AHI1;PSMC5;GCLC;HNRNPK;OPA1;ERBB4;MYO18A;PAK2;SQSTM1;NTSR1
actomyosin structure organization (GO:0031032)	26054	0.0104668	0.0827131	0	0	4.02689	18.3608	TPM1;EPB41L3;MYO18A;SORBS1;CDC42BPA
interleukin-12-mediated signaling pathway (GO:0035722)	16893	0.010487	0.0827131	0	0	5.05485	23.0381	HNRNPDL;CAPZA1;HNRNPA2B1;PAK2
cellular response to interleukin-12 (GO:0071349)	16893	0.010487	0.0827131	0	0	5.05485	23.0381	HNRNPDL;CAPZA1;HNRNPA2B1;PAK2
regulation of apoptotic process (GO:0042981)	25/815	0.0105935	0.0832401	0	0	1.71295	7.78968	ANP32A;PHB;KALRN;NCSTN;OPA1;ERBB4;RPS3;MYO18A;PAK2;NTSR1;USP47;NTRK2;SIGMAR1;DAB2IP;LMTK2;ASNS;RPS3A;ACTN4;AHI1;ARHGEF9;GCLC;HNRNPK;MADD;TARDBP;SQSTM1
cellular response to epidermal growth factor stimulus (GO:0071364)	44280	0.010917	0.0848293	0	0	7.22543	32.6404	EEF1A1;DAB2IP;INPP5K
regulation of apoptotic signaling pathway (GO:2001233)	44280	0.010917	0.0848293	0	0	7.22543	32.6404	MADD;RPS3;DAB2IP
regulation of cellular protein localization (GO:1903827)	44280	0.010917	0.0848293	0	0	7.22543	32.6404	PIN1;RAB11FIP5;RAB11B
positive regulation of long-term synaptic potentiation (GO:1900273)	2021-02-09	0.0114513	0.0854973	0	0	15.1097	67.5353	SQSTM1;SHANK3
central nervous system neuron development (GO:0021954)	44236	0.0114513	0.0854973	0	0	15.1097	67.5353	NTRK2;MAP2
myelin assembly (GO:0032288)	2021-02-09	0.0114513	0.0854973	0	0	15.1097	67.5353	CNTNAP1;EPB41L3
regulation of skeletal muscle cell differentiation (GO:2001014)	44236	0.0114513	0.0854973	0	0	15.1097	67.5353	DDX17;DDX5
receptor recycling (GO:0001881)	44236	0.0114513	0.0854973	0	0	15.1097	67.5353	LMTK2;RAB11B
Golgi vesicle budding (GO:0048194)	44236	0.0114513	0.0854973	0	0	15.1097	67.5353	VAPB;MYO18A
positive regulation of establishment of protein localization to telomere (GO:1904851)	2021-02-09	0.0114513	0.0854973	0	0	15.1097	67.5353	CCT7;CCT4
axonal transport of mitochondrion (GO:0019896)	44236	0.0114513	0.0854973	0	0	15.1097	67.5353	OPA1;NEFL
cellular response to acidic pH (GO:0071468)	44236	0.0114513	0.0854973	0	0	15.1097	67.5353	RAB11FIP5;RAB11B
mitochondrial fragmentation involved in apoptotic process (GO:0043653)	2021-02-09	0.0114513	0.0854973	0	0	15.1097	67.5353	ERBB4;VPS35
cytoskeletal anchoring at plasma membrane (GO:0007016)	44236	0.0114513	0.0854973	0	0	15.1097	67.5353	EPB41L3;SHANK1
cellular macromolecule catabolic process (GO:0044265)	1948-04-01	0.0121478	0.0899276	0	0	4.82459	21.2794	FBXO2;DAB2IP;HNRNPD;SND1
positive regulation of glucose import (GO:0046326)	2021-03-26	0.0121732	0.0899276	0	0	6.91093	30.4669	OSBPL8;SORBS1;ARPP19
regulation of T cell receptor signaling pathway (GO:0050856)	44281	0.0121732	0.0899276	0	0	6.91093	30.4669	PRNP;RPS3;THY1
glutathione metabolic process (GO:0006749)	1949-04-01	0.0130377	0.095976	0	0	4.71713	20.4719	EEF1G;GCLC;GSS;HAGH
mitochondrial transport (GO:0006839)	7/135	0.013445	0.0980683	0	0	2.91353	12.5548	CHCHD4;TIMM10B;HSP90AA1;VPS35;CYC1;SLC25A12;TIMM50
negative regulation of small GTPase mediated signal transduction (GO:0051058)	44282	0.0135089	0.0980683	0	0	6.62264	28.5065	SYNGAP1;RASA3;DAB2IP
modulation by host of viral transcription (GO:0043921)	44282	0.0135089	0.0980683	0	0	6.62264	28.5065	INPP5K;NUCKS1;TARDBP
protein targeting to vacuole (GO:0006623)	44282	0.0135089	0.0980683	0	0	6.62264	28.5065	VPS41;VTI1B;RAB7A
response to acidic pH (GO:0010447)	44237	0.014139	0.0998772	0	0	13.2204	56.3031	RAB11FIP5;RAB11B
positive regulation of glucose import in response to insulin stimulus (GO:2001275)	44237	0.014139	0.0998772	0	0	13.2204	56.3031	OSBPL8;SORBS1
glycerolipid metabolic process (GO:0046486)	44237	0.014139	0.0998772	0	0	13.2204	56.3031	PGP;DGKZ
actin filament depolymerization (GO:0030042)	44237	0.014139	0.0998772	0	0	13.2204	56.3031	MICAL3;DSTN
protein localization to synapse (GO:0035418)	44237	0.014139	0.0998772	0	0	13.2204	56.3031	NLGN1;SHANK1
regulation of establishment of protein localization to telomere (GO:0070203)	2021-02-10	0.014139	0.0998772	0	0	13.2204	56.3031	CCT7;CCT4
positive regulation of execution phase of apoptosis (GO:1900119)	2021-02-10	0.014139	0.0998772	0	0	13.2204	56.3031	RPS3;SIRT2
positive regulation of nuclease activity (GO:0032075)	2021-02-10	0.014139	0.0998772	0	0	13.2204	56.3031	VAPB;DAB2IP
positive regulation of transferase activity (GO:0051347)	7/137	0.0144795	0.100715	0	0	2.86841	12.1478	NTRK2;HSP90AA1;HSP90AB1;ERBB4;LMTK2;PIN1;CCT4
DNA-templated transcription, termination (GO:0006353)	6/106	0.0144975	0.100715	0	0	3.19243	13.516	PRMT5;SRSF1;SRSF2;SRSF3;SNRPE;SNRPB
response to endoplasmic reticulum stress (GO:0034976)	6/106	0.0144975	0.100715	0	0	3.19243	13.516	BAG6;TMX4;TMX3;ITPR1;DAB2IP;EIF2S1
positive regulation of cellular component organization (GO:0051130)	6/106	0.0144975	0.100715	0	0	3.19243	13.516	NLGN1;LRP1;RPS3;DAB2IP;NEDD4L;SHANK3
RNA splicing (GO:0008380)	6/106	0.0144975	0.100715	0	0	3.19243	13.516	EFTUD2;SYNCRIP;KHSRP;SRSF2;TARDBP;SNRPB
regulation of receptor internalization (GO:0002090)	2021-03-28	0.0149247	0.102663	0	0	6.35741	26.7312	AHI1;ATXN2;FMR1
regulation of NIK/NF-kappaB signaling (GO:1901222)	2021-03-28	0.0149247	0.102663	0	0	6.35741	26.7312	CPNE1;RPS3;ACTN4
dopamine receptor signaling pathway (GO:0007212)	2021-03-28	0.0149247	0.102663	0	0	6.35741	26.7312	GNA11;GNAQ;GNAS
neuron differentiation (GO:0030182)	7/139	0.0155696	0.106749	0	0	2.82466	11.7575	FXR1;NTRK2;ATP8A2;TUBB3;FMR1;DCLK2;PIN1
regulation of cell-matrix adhesion (GO:0001952)	1952-04-01	0.0159529	0.10902	0	0	4.42164	18.2972	CASK;CDH13;THY1;CORO1C
regulation of activated T cell proliferation (GO:0046006)	2021-03-29	0.0164212	0.111606	0	0	6.11258	25.1177	PRNP;PRKAR1A;RPS3
Wnt signaling pathway (GO:0016055)	6/109	0.0164376	0.111606	0	0	3.09897	12.7311	SNX3;VPS29;CSNK1A1;VPS35;SKP1;RBX1
nuclear-transcribed mRNA catabolic process (GO:0000956)	8/174	0.0166342	0.112265	0	0	2.56953	10.5256	EIF4A2;EIF4A1;DDX5;RPS3;RPS3A;ETF1;EIF3E;RPL26
modification-dependent protein catabolic process (GO:0019941)	7/141	0.0167168	0.112265	0	0	2.78222	11.383	BAG6;DDB1;PSMD11;PSMC6;PSMC2;NEDD4L;SQSTM1
negative regulation of MAPK cascade (GO:0043409)	29342	0.0168918	0.112265	0	0	3.54203	14.4548	CAMK2N1;DAB2IP;INPP5K;PIN1;PHB
positive regulation of posttranscriptional gene silencing (GO:0060148)	2021-02-11	0.0170699	0.112265	0	0	11.7508	47.831	FXR1;FMR1
positive regulation of protein localization to chromosome, telomeric region (GO:1904816)	44238	0.0170699	0.112265	0	0	11.7508	47.831	CCT7;CCT4
Golgi ribbon formation (GO:0090161)	44238	0.0170699	0.112265	0	0	11.7508	47.831	PRMT5;MYO18A
phosphatidylinositol dephosphorylation (GO:0046856)	2021-02-11	0.0170699	0.112265	0	0	11.7508	47.831	SACM1L;INPP5K
cytoplasmic mRNA processing body assembly (GO:0033962)	2021-02-11	0.0170699	0.112265	0	0	11.7508	47.831	DDX6;ATXN2
modulation by host of viral genome replication (GO:0044827)	44238	0.0170699	0.112265	0	0	11.7508	47.831	FMR1;NUCKS1
presynaptic membrane organization (GO:0097090)	44238	0.0170699	0.112265	0	0	11.7508	47.831	NLGN1;CNTN2
negative regulation of transferase activity (GO:0051348)	2021-03-30	0.0179988	0.116523	0	0	5.88589	23.6463	EIF4A2;CDKN1B;INPP5K
regulation of cation transmembrane transport (GO:1904062)	2021-03-30	0.0179988	0.116523	0	0	5.88589	23.6463	DPP6;HOMER1;KCNIP4
positive regulation of reactive oxygen species biosynthetic process (GO:1903428)	44285	0.0179988	0.116523	0	0	5.88589	23.6463	HSP90AA1;HSP90AB1;GPRIN1
protein targeting to mitochondrion (GO:0006626)	19815	0.0181061	0.116523	0	0	4.24434	17.0262	CHCHD4;TIMM10B;HSP90AA1;TIMM50
cytoplasmic translation (GO:0002181)	1954-04-01	0.0181061	0.116523	0	0	4.24434	17.0262	RPS3;RPS3A;RPL26;ZC3H15
membrane fusion (GO:0061025)	1954-04-01	0.0181061	0.116523	0	0	4.24434	17.0262	CHCHD3;OPA1;VPS41;VTI1B
negative regulation of supramolecular fiber organization (GO:1902904)	19815	0.0181061	0.116523	0	0	4.24434	17.0262	SHANK3;TUBB4A;HDGFL3;SHANK1
positive regulation of DNA metabolic process (GO:0051054)	30072	0.0186087	0.119392	0	0	3.44968	13.7439	TRIM28;DHX36;RPS3;BRCC3;HRAS
regulation of RNA splicing (GO:0043484)	20180	0.0192471	0.122737	0	0	4.1609	16.4372	HNRNPH1;HABP4;SRSF3;PTBP2
positive regulation of DNA biosynthetic process (GO:2000573)	20180	0.0192471	0.122737	0	0	4.1609	16.4372	HSP90AA1;HSP90AB1;CCT7;CCT4
anterograde axonal transport (GO:0008089)	44286	0.0196577	0.124598	0	0	5.67539	22.3002	FXR1;FMR1;NEFL
positive regulation of viral genome replication (GO:0045070)	2021-03-31	0.0196577	0.124598	0	0	5.67539	22.3002	DDB1;VAPB;NUCKS1
positive regulation of establishment of protein localization (GO:1904951)	2021-02-12	0.020234	0.124856	0	0	10.5752	41.2474	CCT7;CCT4
vesicle budding from membrane (GO:0006900)	2021-02-12	0.020234	0.124856	0	0	10.5752	41.2474	SNX3;MYO18A
mitochondrion transport along microtubule (GO:0047497)	2021-02-12	0.020234	0.124856	0	0	10.5752	41.2474	OPA1;NEFL
negative regulation of substrate adhesion-dependent cell spreading (GO:1900025)	2021-02-12	0.020234	0.124856	0	0	10.5752	41.2474	ACTN4;CORO1C
positive regulation of ruffle assembly (GO:1900029)	2021-02-12	0.020234	0.124856	0	0	10.5752	41.2474	NLGN1;HRAS
negative regulation by host of viral transcription (GO:0043922)	2021-02-12	0.020234	0.124856	0	0	10.5752	41.2474	INPP5K;TARDBP
regulation of skeletal muscle tissue development (GO:0048641)	44239	0.020234	0.124856	0	0	10.5752	41.2474	DDX17;DDX5
negative regulation of vascular smooth muscle cell proliferation (GO:1904706)	44239	0.020234	0.124856	0	0	10.5752	41.2474	CDKN1B;TPM1
PERK-mediated unfolded protein response (GO:0036499)	44239	0.020234	0.124856	0	0	10.5752	41.2474	ASNS;EIF2S1
protein oligomerization (GO:0051259)	9/217	0.0210018	0.129213	0	0	2.30837	8.91756	MPP2;KHDRBS1;PRNP;NLGN1;TRIM28;OPA1;ATL2;ANXA6;PFKM
regulation of potassium ion transmembrane transport (GO:1901379)	11749	0.0213982	0.130504	0	0	5.4794	21.0653	DPP6;KCNIP4;NEDD4L
positive regulation of telomere maintenance (GO:0032206)	11749	0.0213982	0.130504	0	0	5.4794	21.0653	DHX36;HNRNPA2B1;HNRNPD
regulation of nitric oxide biosynthetic process (GO:0045428)	1932-03-01	0.0213982	0.130504	0	0	5.4794	21.0653	HSP90AA1;HSP90AB1;KHSRP
calcium ion transmembrane transport (GO:0070588)	1986-05-01	0.0223784	0.136087	0	0	3.27865	12.4578	SLC24A3;GPRIN1;PHB;GRIN2B;GRIN2D
receptor metabolic process (GO:0043112)	21276	0.0229326	0.139054	0	0	3.92914	14.8333	TFRC;LRP1;LMTK2;RAB11B
regulation of plasma membrane bounded cell projection organization (GO:0120035)	44240	0.0236218	0.139996	0	0	9.61333	36.0076	NCS1;VPS35
regulation of glucose import in response to insulin stimulus (GO:2001273)	44240	0.0236218	0.139996	0	0	9.61333	36.0076	OSBPL8;SORBS1
viral translation (GO:0019081)	44240	0.0236218	0.139996	0	0	9.61333	36.0076	EIF3L;EIF3G
endoplasmic reticulum tubular network organization (GO:0071786)	44240	0.0236218	0.139996	0	0	9.61333	36.0076	ATL2;RAB18
myelination in peripheral nervous system (GO:0022011)	44240	0.0236218	0.139996	0	0	9.61333	36.0076	CNTNAP1;SIRT2
phospholipase C-activating dopamine receptor signaling pathway (GO:0060158)	2021-02-13	0.0236218	0.139996	0	0	9.61333	36.0076	GNA11;GNAQ
synaptic vesicle localization (GO:0097479)	2021-02-13	0.0236218	0.139996	0	0	9.61333	36.0076	NLGN1;TMEM230
regulation of cAMP-dependent protein kinase activity (GO:2000479)	2021-02-13	0.0236218	0.139996	0	0	9.61333	36.0076	PRKAR1B;PRKAR1A
regulation of neuron projection development (GO:0010975)	6/119	0.0241828	0.142911	0	0	2.82327	10.5086	SNX3;NTRK2;LRRC7;NCS1;DAB2IP;DBN1
regulation of protein metabolic process (GO:0051246)	1959-04-01	0.0242499	0.142911	0	0	3.8575	14.3474	LRP1;TRAF3;NEDD4L;VPS35
regulation of proteasomal ubiquitin-dependent protein catabolic process (GO:0032434)	1988-05-01	0.0244359	0.143604	0	0	3.19932	11.8749	BAG6;HSP90AB1;CSNK1A1;SIRT2;RBX1
Ras protein signal transduction (GO:0007265)	9/223	0.0245165	0.143675	0	0	2.24295	8.31778	RAP2B;TRIM28;G3BP2;RAB18;CDH13;HRAS;PAK2;RAB7A;RAB11B
apoptotic mitochondrial changes (GO:0008637)	12479	0.025124	0.146012	0	0	5.12537	18.8815	ERBB4;VPS35;TIMM50
positive regulation of telomere maintenance via telomere lengthening (GO:1904358)	12479	0.025124	0.146012	0	0	5.12537	18.8815	HNRNPA2B1;CCT7;CCT4
regulation of insulin receptor signaling pathway (GO:0046626)	1934-03-01	0.025124	0.146012	0	0	5.12537	18.8815	PTPRE;INPP5K;NUCKS1
Golgi organization (GO:0007030)	6/121	0.025981	0.150575	0	0	2.77389	10.1258	PRMT5;LMAN2L;CSNK1A1;LMAN2;ATL2;MYO18A
regulation of Ras protein signal transduction (GO:0046578)	1990-05-01	0.0266113	0.152715	0	0	3.12372	11.3279	SYNGAP1;RASA3;MADD;DAB2IP;SQSTM1
positive regulation of RNA metabolic process (GO:0051254)	12844	0.0271092	0.152715	0	0	4.96495	17.9129	DDX5;HABP4;HRAS
negative regulation of cell-substrate adhesion (GO:0010812)	12844	0.0271092	0.152715	0	0	4.96495	17.9129	CASK;ACTN4;CORO1C
regulation of microtubule polymerization (GO:0031113)	12844	0.0271092	0.152715	0	0	4.96495	17.9129	MAP2;RPS3;TUBB4A
regulation of ion transmembrane transport (GO:0034765)	1935-03-01	0.0271092	0.152715	0	0	4.96495	17.9129	KCNJ6;AHCYL1;NEDD4L
lipid particle organization (GO:0034389)	2021-02-14	0.0272237	0.152715	0	0	8.81177	31.7547	RAB18;RAB3GAP1
response to ethanol (GO:0045471)	44241	0.0272237	0.152715	0	0	8.81177	31.7547	GPRIN1;GRIN2B
positive regulation of DNA damage response, signal transduction by p53 class mediator (GO:0043517)	44241	0.0272237	0.152715	0	0	8.81177	31.7547	DDX5;RPL26
negative regulation of smooth muscle cell migration (GO:0014912)	44241	0.0272237	0.152715	0	0	8.81177	31.7547	LRP1;TPM1
regulation of protein modification by small protein conjugation or removal (GO:1903320)	2021-02-14	0.0272237	0.152715	0	0	8.81177	31.7547	HSP90AA1;HSP90AB1
regulation of mRNA catabolic process (GO:0061013)	2021-02-14	0.0272237	0.152715	0	0	8.81177	31.7547	FMR1;KHSRP
negative regulation of T cell receptor signaling pathway (GO:0050860)	2021-02-14	0.0272237	0.152715	0	0	8.81177	31.7547	PRNP;THY1
positive regulation of GTPase activity (GO:0043547)	8/192	0.0279802	0.15654	0	0	2.31602	8.28269	RABGAP1L;RALGAPB;RABGAP1;PIN1;THY1;HRAS;RAB3GAP1;CORO1C
vesicle-mediated transport in synapse (GO:0099003)	13210	0.0291758	0.162363	0	0	4.81425	17.0156	NLGN1;CANX;TMEM230
endosome organization (GO:0007032)	13210	0.0291758	0.162363	0	0	4.81425	17.0156	SNX3;HOOK3;SQSTM1
regulation of programmed cell death (GO:0043067)	10/268	0.0294606	0.163514	0	0	2.06814	7.28959	USP47;PSMC5;ANP32A;OPA1;MADD;RPS3;ACTN4;PHB;TARDBP;PAK2
protein dephosphorylation (GO:0006470)	6/125	0.0298392	0.165033	0	0	2.6801	9.41233	PTPRE;PTPRZ1;PGP;PTPN5;TIMM50;PPP1CA
adenylate cyclase-inhibiting G-protein coupled receptor signaling pathway (GO:0007193)	1963-04-01	0.0299702	0.165033	0	0	3.59524	12.6105	GABBR1;AKAP5;GRM1;GNAI1
positive regulation of cell projection organization (GO:0031346)	1963-04-01	0.0299702	0.165033	0	0	3.59524	12.6105	SNX3;NTRK2;LRRC7;DAB2IP
intracellular protein transport (GO:0006886)	12/347	0.0303434	0.16595	0	0	1.91428	6.69076	VPS29;STX12;RABGAP1L;NLGN1;RABGAP1;SNX27;RAB18;VPS35;SEC61B;RAB7A;RAB11B;YWHAH
G2/M transition of mitotic cell cycle (GO:0000086)	6/126	0.0308593	0.16595	0	0	2.65763	9.24408	KHDRBS1;HSP90AA1;TUBB4B;ARPP19;TUBB4A;SKP1
cytoskeleton organization (GO:0007010)	6/126	0.0308593	0.16595	0	0	2.65763	9.24408	CNTNAP1;TPM1;EPB41L3;MICAL3;THY1;SHANK1
negative regulation of peptidyl-threonine phosphorylation (GO:0010801)	2021-02-15	0.0310307	0.16595	0	0	8.13353	28.2459	INPP5K;SIRT2
selective autophagy (GO:0061912)	2021-02-15	0.0310307	0.16595	0	0	8.13353	28.2459	SQSTM1;RAB7A
response to X-ray (GO:0010165)	2021-02-15	0.0310307	0.16595	0	0	8.13353	28.2459	NUCKS1;BRCC3
phototransduction, visible light (GO:0007603)	2021-02-15	0.0310307	0.16595	0	0	8.13353	28.2459	GNA11;GNAQ
positive regulation of telomerase RNA localization to Cajal body (GO:1904874)	2021-02-15	0.0310307	0.16595	0	0	8.13353	28.2459	CCT7;CCT4
positive regulation of cellular response to insulin stimulus (GO:1900078)	44242	0.0310307	0.16595	0	0	8.13353	28.2459	OSBPL8;SORBS1
vesicle fusion (GO:0006906)	1994-05-01	0.0313232	0.16595	0	0	2.98272	10.3303	EEA1;STX12;VPS41;RAB7A;VTI1B
epithelial to mesenchymal transition (GO:0001837)	13575	0.0313233	0.16595	0	0	4.67242	16.1824	DDX17;DDX5;TRIM28
spliceosomal snRNP assembly (GO:0000387)	1937-03-01	0.0313233	0.16595	0	0	4.67242	16.1824	PRMT5;SNRPE;SNRPB
myelination (GO:0042552)	13575	0.0313233	0.16595	0	0	4.67242	16.1824	CNTNAP1;EPB41L3;SIRT2
regulation of DNA repair (GO:0006282)	13575	0.0313233	0.16595	0	0	4.67242	16.1824	TRIM28;RPS3;BRCC3
negative regulation of Ras protein signal transduction (GO:0046580)	1937-03-01	0.0313233	0.16595	0	0	4.67242	16.1824	SYNGAP1;RASA3;DAB2IP
protein lipidation (GO:0006497)	6/127	0.031902	0.168167	0	0	2.63553	9.07963	DPM1;NTM;LSAMP;THY1;LY6H;ZDHHC17
cell cycle G2/M phase transition (GO:0044839)	6/127	0.031902	0.168167	0	0	2.63553	9.07963	KHDRBS1;HSP90AA1;TUBB4B;ARPP19;TUBB4A;SKP1
regulation of heart contraction (GO:0008016)	1995-05-01	0.0325776	0.171298	0	0	2.94943	10.0992	AHCYL1;CELF2;TPM1;ITPR1;ATP2B1
positive regulation of neuron death (GO:1901216)	1938-03-01	0.0335514	0.175538	0	0	4.53869	15.4074	PRNP;EIF2S1;GRIN2B
positive regulation of DNA repair (GO:0045739)	13940	0.0335514	0.175538	0	0	4.53869	15.4074	TRIM28;RPS3;BRCC3
regulation of cell death (GO:0010941)	1996-05-01	0.0338629	0.176728	0	0	2.91687	9.87486	CDKN1B;LRP1;RILPL1;VPS35;PHB
cellular response to light stimulus (GO:0071482)	24198	0.0347404	0.177847	0	0	3.42075	11.4932	USP47;FMR1;RPL26;EIF2S1
positive regulation of cellular process (GO:0048522)	16/519	0.0350318	0.177847	0	0	1.70397	5.71086	USP47;NTRK2;CDKN1B;HSP90AB1;LRP1;FMR1;CNBP;ACTN4;PHB;SIRT2;CNST;CAPNS1;ERBB4;GPRIN1;NAMPT;HRAS
cellular response to pH (GO:0071467)	44243	0.0350339	0.177847	0	0	7.55218	25.3107	RAB11B;RAB11FIP5
miRNA metabolic process (GO:0010586)	44243	0.0350339	0.177847	0	0	7.55218	25.3107	DDX17;KHSRP
G-protein coupled acetylcholine receptor signaling pathway (GO:0007213)	44243	0.0350339	0.177847	0	0	7.55218	25.3107	GNA11;GNAQ
activation of protein kinase A activity (GO:0034199)	2021-02-16	0.0350339	0.177847	0	0	7.55218	25.3107	PRKAR1B;PRKAR1A
mitochondrial fusion (GO:0008053)	44243	0.0350339	0.177847	0	0	7.55218	25.3107	CHCHD3;OPA1
detection of visible light (GO:0009584)	44243	0.0350339	0.177847	0	0	7.55218	25.3107	GNA11;GNAQ
myoblast differentiation (GO:0045445)	2021-02-16	0.0350339	0.177847	0	0	7.55218	25.3107	DDX17;DDX5
positive regulation of positive chemotaxis (GO:0050927)	2021-02-16	0.0350339	0.177847	0	0	7.55218	25.3107	CNTN1;CDH13
generation of neurons (GO:0048699)	6/130	0.0351666	0.177847	0	0	2.57137	8.60808	NTRK2;TUBB3;DCLK2;PIN1;ELP3;CIT
cell morphogenesis involved in neuron differentiation (GO:0048667)	35551	0.0351794	0.177847	0	0	2.88501	9.65699	FARP1;MAP2;MAP1A;OMG;NEFH
positive regulation of neuron projection development (GO:0010976)	1997-05-01	0.0351794	0.177847	0	0	2.88501	9.65699	SNX3;NTRK2;LRRC7;DAB2IP;NEDD4L
regulation of mitotic cell cycle (GO:0007346)	7/165	0.0354225	0.178645	0	0	2.3567	7.87233	DDB1;PRMT5;CDKN1B;ASNS;PIN1;PAK2;GNAI1
positive regulation of phagocytosis (GO:0050766)	1939-03-01	0.0358598	0.179985	0	0	4.41239	14.685	TUB;LMAN2;MYO18A
ERBB2 signaling pathway (GO:0038128)	1939-03-01	0.0358598	0.179985	0	0	4.41239	14.685	HSP90AA1;ERBB4;HRAS
response to UV (GO:0009411)	1998-05-01	0.036527	0.182461	0	0	2.85385	9.44538	USP47;FMR1;CIRBP;RPL26;EIF2S1
positive regulation of neuron differentiation (GO:0045666)	1998-05-01	0.036527	0.182461	0	0	2.85385	9.44538	SNX3;NTRK2;LRRC7;CPNE1;DAB2IP
small GTPase mediated signal transduction (GO:0007264)	1999-05-01	0.037906	0.1889	0	0	2.82334	9.23979	ARHGAP32;TRIM28;G3BP2;RAB18;HRAS
negative regulation of transport (GO:0051051)	14671	0.0382478	0.190152	0	0	4.29291	14.0106	SNX3;INPP5K;RAB7A
negative regulation of antigen receptor-mediated signaling pathway (GO:0050858)	2021-02-17	0.0392248	0.19138	0	0	7.04834	22.8257	PRNP;THY1
positive regulation of G-protein coupled receptor protein signaling pathway (GO:0045745)	2021-02-17	0.0392248	0.19138	0	0	7.04834	22.8257	VPS35;PHB
cellular response to gamma radiation (GO:0071480)	2021-02-17	0.0392248	0.19138	0	0	7.04834	22.8257	RPL26;HRAS
histone H2A ubiquitination (GO:0033522)	44244	0.0392248	0.19138	0	0	7.04834	22.8257	DDB1;SKP1
histone H2A monoubiquitination (GO:0035518)	44244	0.0392248	0.19138	0	0	7.04834	22.8257	DDB1;SKP1
positive regulation of cellular protein catabolic process (GO:1903364)	2021-02-17	0.0392248	0.19138	0	0	7.04834	22.8257	HSP90AA1;VPS35
long-term memory (GO:0007616)	44244	0.0392248	0.19138	0	0	7.04834	22.8257	PRNP;SHANK1
chaperone-mediated protein complex assembly (GO:0051131)	2021-02-17	0.0392248	0.19138	0	0	7.04834	22.8257	HSP90AA1;HSP90AB1
cellular response to metal ion (GO:0071248)	5/100	0.0393166	0.191383	0	0	2.79348	9.04	PRNP;NLGN1;CDKN1B;HPCA;CPNE1
adenylate cyclase-modulating G-protein coupled receptor signaling pathway (GO:0007188)	6/134	0.0398433	0.193498	0	0	2.49051	8.0264	GABBR1;GNAQ;GNA11;GNAS;AKAP5;GNAI1
regulation of phagocytosis (GO:0050764)	15036	0.040715	0.195917	0	0	4.17973	13.38	SNX3;TUB;LMAN2
mesenchymal cell differentiation (GO:0048762)	1941-03-01	0.040715	0.195917	0	0	4.17973	13.38	DDX17;DDX5;TRIM28
positive regulation of receptor-mediated endocytosis (GO:0048260)	1941-03-01	0.040715	0.195917	0	0	4.17973	13.38	AHI1;HNRNPK;FMR1
negative regulation of proteolysis (GO:0045861)	1941-03-01	0.040715	0.195917	0	0	4.17973	13.38	BAG6;PRNP;CAMK2N1
negative regulation of gene expression (GO:0010629)	18/618	0.0423595	0.203365	0	0	1.60792	5.08352	KHDRBS1;USP47;CDKN1B;FMR1;DAB2IP;PHB;SIRT2;PTBP2;FXR1;SYNCRIP;ILF3;GCLC;TRIM28;CPNE1;RPS3;INPP5K;TARDBP;HRAS
cellular response to calcium ion (GO:0071277)	1942-03-01	0.0432605	0.20425	0	0	4.07235	12.7893	NLGN1;HPCA;CPNE1
regulation of telomerase activity (GO:0051972)	15401	0.0432605	0.20425	0	0	4.07235	12.7893	HSP90AA1;HSP90AB1;CCT4
regulation of telomerase RNA localization to Cajal body (GO:1904872)	44245	0.0435948	0.20425	0	0	6.60748	20.7	CCT7;CCT4
insulin secretion (GO:0030073)	2021-02-18	0.0435948	0.20425	0	0	6.60748	20.7	RAB11B;RAB11FIP5
regulation of cellular response to growth factor stimulus (GO:0090287)	2021-02-18	0.0435948	0.20425	0	0	6.60748	20.7	ITGA3;CASK
regulation of microtubule polymerization or depolymerization (GO:0031110)	44245	0.0435948	0.20425	0	0	6.60748	20.7	MAP2;MAP1A
cell-substrate adherens junction assembly (GO:0007045)	44245	0.0435948	0.20425	0	0	6.60748	20.7	SORBS1;THY1
mRNA destabilization (GO:0061157)	44245	0.0435948	0.20425	0	0	6.60748	20.7	YTHDF3;KHSRP
focal adhesion assembly (GO:0048041)	2021-02-18	0.0435948	0.20425	0	0	6.60748	20.7	SORBS1;THY1
negative regulation of calcium-mediated signaling (GO:0050849)	44245	0.0435948	0.20425	0	0	6.60748	20.7	PRNP;ITPR1
regulation of cell communication (GO:0010646)	26024	0.0436148	0.20425	0	0	3.16466	9.91287	GRIA1;NLGN1;PSMC5;GRIA3
mRNA transport (GO:0051028)	5/104	0.0452755	0.211555	0	0	2.68006	8.29476	FMR1;SRSF1;HNRNPA2B1;SRSF2;SRSF3
protein transmembrane import into intracellular organelle (GO:0044743)	1943-03-01	0.0458838	0.213446	0	0	3.97034	12.2352	CHCHD4;HSP90AA1;TIMM50
substantia nigra development (GO:0021762)	1943-03-01	0.0458838	0.213446	0	0	3.97034	12.2352	INA;SIRT2;YWHAH
translational elongation (GO:0006414)	5/105	0.0468449	0.217435	0	0	2.65313	8.12098	EFTUD2;EEF1A1;EEF1G;EEF1A2;EEF2
protein N-linked glycosylation (GO:0006487)	1973-04-01	0.0474886	0.219066	0	0	3.07262	9.36309	DPM1;RPN1;GFPT1;UBE2J1
regulation of protein complex assembly (GO:0043254)	1973-04-01	0.0474886	0.219066	0	0	3.07262	9.36309	HSP90AA1;VPS41;RPS3;DAB2IP
regulation of gluconeogenesis (GO:0006111)	44246	0.0481361	0.219066	0	0	6.21849	18.8652	PGP;ARPP19
negative regulation of phosphate metabolic process (GO:0045936)	2021-02-19	0.0481361	0.219066	0	0	6.21849	18.8652	CDKN1B;INPP5K
regulation of long-term synaptic potentiation (GO:1900271)	44246	0.0481361	0.219066	0	0	6.21849	18.8652	SQSTM1;SHANK3
acetylcholine receptor signaling pathway (GO:0095500)	2021-02-19	0.0481361	0.219066	0	0	6.21849	18.8652	GNA11;GNAQ
intracellular estrogen receptor signaling pathway (GO:0030520)	2021-02-19	0.0481361	0.219066	0	0	6.21849	18.8652	DDX17;DDX5
protein heterotetramerization (GO:0051290)	2021-02-19	0.0481361	0.219066	0	0	6.21849	18.8652	GPRIN1;GRIN2B
regulation of catenin import into nucleus (GO:0035412)	2021-02-19	0.0481361	0.219066	0	0	6.21849	18.8652	GNAQ;DAB2IP
positive regulation of viral life cycle (GO:1903902)	1944-03-01	0.048584	0.219675	0	0	3.8733	11.7146	DDB1;VAPB;FMR1
protein N-linked glycosylation via asparagine (GO:0018279)	1944-03-01	0.048584	0.219675	0	0	3.8733	11.7146	DPM1;RPN1;UBE2J1
posttranscriptional regulation of gene expression (GO:0010608)	1944-03-01	0.048584	0.219675	0	0	3.8733	11.7146	DDX6;ATXN2;MATR3
mRNA 3'-end processing (GO:0031124)	1974-04-01	0.0494947	0.223312	0	0	3.02857	9.10355	AHCYL1;SRSF1;SRSF2;SRSF3
peptidyl-asparagine modification (GO:0018196)	16497	0.0513604	0.231232	0	0	3.78089	11.225	DPM1;RPN1;UBE2J1
C-terminal protein lipidation (GO:0006501)	1975-04-01	0.0515469	0.231575	0	0	2.98576	8.85357	NTM;LSAMP;THY1;LY6H
ER to Golgi vesicle-mediated transport (GO:0006888)	7/180	0.052287	0.234398	0	0	2.1507	6.34673	GRIA1;LMAN2L;VAPB;COPB1;LMAN2;CAPZA1;VTI1B
purine nucleotide metabolic process (GO:0006163)	44247	0.0528406	0.234872	0	0	5.87272	17.2686	PRPS1;ITPA
Arp2/3 complex-mediated actin nucleation (GO:0034314)	44247	0.0528406	0.234872	0	0	5.87272	17.2686	ACTR3;IQGAP2
regulation of glycogen biosynthetic process (GO:0005979)	2021-02-20	0.0528406	0.234872	0	0	5.87272	17.2686	INPP5K;SORBS1
telomere maintenance via telomerase (GO:0007004)	44247	0.0528406	0.234872	0	0	5.87272	17.2686	HSP90AA1;HSP90AB1
nucleocytoplasmic transport (GO:0006913)	1946-03-01	0.0542121	0.239951	0	0	3.69277	10.7639	ANP32A;SNRPE;SNRPB
cellular response to ionizing radiation (GO:0071479)	1946-03-01	0.0542121	0.239951	0	0	3.69277	10.7639	NUCKS1;RPL26;HRAS
negative regulation of I-kappaB kinase/NF-kappaB signaling (GO:0043124)	17227	0.057138	0.248066	0	0	3.60866	10.329	USP10;G3BP2;DAB2IP
heterophilic cell-cell adhesion via plasma membrane cell adhesion molecules (GO:0007157)	17227	0.057138	0.248066	0	0	3.60866	10.329	NLGN1;ALCAM;CD200
regulation of protein kinase activity (GO:0045859)	6/147	0.0576736	0.248066	0	0	2.25938	6.4459	RAP2B;CAMK2N1;GNAQ;INPP5K;THY1;PAK2
GTP metabolic process (GO:0046039)	44248	0.0577008	0.248066	0	0	5.56334	15.8694	OPA1;GPHN
RNA-dependent DNA biosynthetic process (GO:0006278)	44248	0.0577008	0.248066	0	0	5.56334	15.8694	HSP90AA1;HSP90AB1
establishment of protein localization to vacuole (GO:0072666)	2021-02-21	0.0577008	0.248066	0	0	5.56334	15.8694	VPS41;VTI1B
regulation of ruffle assembly (GO:1900027)	2021-02-21	0.0577008	0.248066	0	0	5.56334	15.8694	NLGN1;HRAS
regulation of nuclear division (GO:0051783)	2021-02-21	0.0577008	0.248066	0	0	5.56334	15.8694	PRMT5;PIN1
regulation of interleukin-2 production (GO:0032663)	2021-02-21	0.0577008	0.248066	0	0	5.56334	15.8694	PRNP;RPS3
nucleotide-excision repair, preincision complex stabilization (GO:0006293)	2021-02-21	0.0577008	0.248066	0	0	5.56334	15.8694	DDB1;RBX1
negative regulation of cyclin-dependent protein kinase activity (GO:1904030)	2021-02-21	0.0577008	0.248066	0	0	5.56334	15.8694	CDKN1B;CAMK2N1
positive regulation of lipid metabolic process (GO:0045834)	2021-02-21	0.0577008	0.248066	0	0	5.56334	15.8694	EEF1A2;SORBS1
positive regulation of receptor internalization (GO:0002092)	44248	0.0577008	0.248066	0	0	5.56334	15.8694	AHI1;FMR1
synaptic transmission, glutamatergic (GO:0035249)	2021-02-21	0.0577008	0.248066	0	0	5.56334	15.8694	GRIA1;GRIA3
nuclear-transcribed mRNA catabolic process, nonsense-mediated decay (GO:0000184)	5/112	0.0587273	0.251963	0	0	2.47867	7.02665	RPS3;RPS3A;ETF1;EIF3E;RPL26
regulated exocytosis (GO:0045055)	6/148	0.0592146	0.253535	0	0	2.24335	6.34103	TMX3;HABP4;ACTN4;VTI1B;RAB11FIP5;RAB11B
regulation of hydrolase activity (GO:0051336)	1980-04-01	0.0624934	0.262603	0	0	2.78862	7.73198	NTRK2;RABGAP1;DAB2IP;RAB3GAP1
regulation of calcium ion transport into cytosol (GO:0010522)	2021-02-22	0.0627092	0.262603	0	0	5.28491	14.6352	PRNP;GPRIN1
positive regulation of proteolysis involved in cellular protein catabolic process (GO:1903052)	2021-02-22	0.0627092	0.262603	0	0	5.28491	14.6352	FMR1;DAB2IP
nucleotide-excision repair, DNA incision, 3'-to lesion (GO:0006295)	2021-02-22	0.0627092	0.262603	0	0	5.28491	14.6352	DDB1;RBX1
nucleotide-excision repair, DNA duplex unwinding (GO:0000717)	2021-02-22	0.0627092	0.262603	0	0	5.28491	14.6352	DDB1;RBX1
regulation of microtubule depolymerization (GO:0031114)	2021-02-22	0.0627092	0.262603	0	0	5.28491	14.6352	MAP1A;HDGFL3
beta-catenin destruction complex disassembly (GO:1904886)	2021-02-22	0.0627092	0.262603	0	0	5.28491	14.6352	CSNK1A1;PPP1CA
positive regulation of biosynthetic process (GO:0009891)	2021-02-22	0.0627092	0.262603	0	0	5.28491	14.6352	GPRIN1;SORBS1
regulation of ERBB signaling pathway (GO:1901184)	2021-02-22	0.0627092	0.262603	0	0	5.28491	14.6352	ERBB4;CDH13
negative regulation of GTPase activity (GO:0034260)	2021-02-22	0.0627092	0.262603	0	0	5.28491	14.6352	DAB2IP;HRAS
positive regulation of RNA splicing (GO:0033120)	2021-02-22	0.0627092	0.262603	0	0	5.28491	14.6352	CELF4;HABP4
regulation of GTPase activity (GO:0043087)	7/188	0.0630444	0.26348	0	0	2.0548	5.67928	NTRK2;RABGAP1;DAB2IP;PIN1;THY1;HRAS;RAB3GAP1
establishment of protein localization to mitochondrion (GO:0072655)	1949-03-01	0.0632091	0.263644	0	0	3.45141	9.5304	CHCHD4;TIMM10B;TIMM50
regulation of macroautophagy (GO:0016241)	5/116	0.0662215	0.274841	0	0	2.38886	6.48515	ATP6V1G1;CAPNS1;EXOC7;VPS35;PAFAH1B2
regulation of ion transport (GO:0043269)	18323	0.0663522	0.274841	0	0	3.3778	9.16323	KCNJ6;NEDD4L;RAB11B
regulation of cellular protein metabolic process (GO:0032268)	18323	0.0663522	0.274841	0	0	3.3778	9.16323	DDX6;ATXN2;VPS35
retrograde transport, endosome to Golgi (GO:0042147)	30042	0.0671882	0.274841	0	0	2.71684	7.33616	VPS29;VPS35;RAB7A;VTI1B
C-terminal protein amino acid modification (GO:0018410)	1982-04-01	0.0671882	0.274841	0	0	2.71684	7.33616	NTM;LSAMP;THY1;LY6H
negative regulation of binding (GO:0051100)	1982-04-01	0.0671882	0.274841	0	0	2.71684	7.33616	CPNE1;HABP4;PIN1;PPP1CA
negative regulation of viral transcription (GO:0032897)	2021-02-23	0.0678587	0.274841	0	0	5.03299	13.5404	INPP5K;TARDBP
microtubule polymerization or depolymerization (GO:0031109)	2021-02-23	0.0678587	0.274841	0	0	5.03299	13.5404	ZNF207;HDGFL3
nucleotide-excision repair, DNA damage recognition (GO:0000715)	2021-02-23	0.0678587	0.274841	0	0	5.03299	13.5404	DDB1;RBX1
phospholipid dephosphorylation (GO:0046839)	2021-02-23	0.0678587	0.274841	0	0	5.03299	13.5404	SACM1L;INPP5K
regulation of dendritic spine morphogenesis (GO:0061001)	2021-02-23	0.0678587	0.274841	0	0	5.03299	13.5404	NLGN1;SHANK3
negative regulation of axonogenesis (GO:0050771)	44250	0.0678587	0.274841	0	0	5.03299	13.5404	OMG;THY1
regulation of monooxygenase activity (GO:0032768)	2021-02-23	0.0678587	0.274841	0	0	5.03299	13.5404	HSP90AA1;POR
cellular response to amyloid-beta (GO:1904646)	2021-02-23	0.0678587	0.274841	0	0	5.03299	13.5404	PRNP;LRP1
regulation of androgen receptor signaling pathway (GO:0060765)	2021-02-23	0.0678587	0.274841	0	0	5.03299	13.5404	DDX5;PHB
protein localization to cell periphery (GO:1990778)	5/117	0.0681747	0.275589	0	0	2.36741	6.3581	DPP6;PDZD11;EPB41L3;KCNIP4;INPP5K
negative regulation of apoptotic process (GO:0043066)	14/485	0.0717708	0.284683	0	0	1.58605	4.1781	USP47;NTRK2;LMTK2;ASNS;RPS3A;AHI1;GCLC;HNRNPK;OPA1;ERBB4;MYO18A;PAK2;SQSTM1;NTSR1
activation of GTPase activity (GO:0090630)	1984-04-01	0.0720606	0.284683	0	0	2.64864	6.96659	RABGAP1L;RALGAPB;RABGAP1;CORO1C
regulation of neuron differentiation (GO:0045664)	1984-04-01	0.0720606	0.284683	0	0	2.64864	6.96659	NLGN1;NCS1;CPNE1;YWHAH
regulation of calcium ion transport (GO:0051924)	19054	0.0728478	0.284683	0	0	3.2396	8.48576	HOMER1;HOMER2;INPP5K
plasma membrane bounded cell projection morphogenesis (GO:0120039)	19054	0.0728478	0.284683	0	0	3.2396	8.48576	CNTNAP1;EPB41L3;DAB2IP
regulation of DNA binding (GO:0051101)	19054	0.0728478	0.284683	0	0	3.2396	8.48576	CPNE1;HABP4;SIRT2
positive regulation of immune effector process (GO:0002699)	2021-02-24	0.0731422	0.284683	0	0	4.80397	12.5641	MYO18A;PHB
negative regulation of cytoskeleton organization (GO:0051494)	2021-02-24	0.0731422	0.284683	0	0	4.80397	12.5641	SHANK3;SHANK1
histone monoubiquitination (GO:0010390)	44251	0.0731422	0.284683	0	0	4.80397	12.5641	DDB1;SKP1
histone mRNA metabolic process (GO:0008334)	44251	0.0731422	0.284683	0	0	4.80397	12.5641	SNRPE;SNRPB
regulation of actin filament bundle assembly (GO:0032231)	44251	0.0731422	0.284683	0	0	4.80397	12.5641	SHANK3;SHANK1
positive regulation of endopeptidase activity (GO:0010950)	2021-02-24	0.0731422	0.284683	0	0	4.80397	12.5641	GPRIN1;GRIN2B
DNA geometric change (GO:0032392)	44251	0.0731422	0.284683	0	0	4.80397	12.5641	DDX1;HNRNPA2B1
regulation of transmembrane transport (GO:0034762)	44251	0.0731422	0.284683	0	0	4.80397	12.5641	KCNJ6;NEDD4L
cellular senescence (GO:0090398)	2021-02-24	0.0731422	0.284683	0	0	4.80397	12.5641	OPA1;HRAS
regulation of neuronal synaptic plasticity (GO:0048168)	44251	0.0731422	0.284683	0	0	4.80397	12.5641	RAB3GAP1;DBN1
mRNA splice site selection (GO:0006376)	2021-02-24	0.0731422	0.284683	0	0	4.80397	12.5641	CELF2;SRSF1
actin nucleation (GO:0045010)	2021-02-24	0.0731422	0.284683	0	0	4.80397	12.5641	ACTR3;IQGAP2
negative regulation of proteasomal ubiquitin-dependent protein catabolic process (GO:0032435)	2021-02-24	0.0731422	0.284683	0	0	4.80397	12.5641	BAG6;HSP90AB1
negative regulation of T cell proliferation (GO:0042130)	44251	0.0731422	0.284683	0	0	4.80397	12.5641	PRNP;PRKAR1A
regulation of cell migration (GO:0030334)	10/316	0.0732739	0.284683	0	0	1.73941	4.54603	ERBB4;TPM1;ELP1;CNTN1;CDH13;ELP3;ACTN4;THY1;HRAS;CORO1C
actin filament organization (GO:0007015)	5/120	0.0742242	0.287842	0	0	2.30529	5.99529	TPM3;PALM2;TPM1;DSTN;DBN1
positive regulation of macromolecule metabolic process (GO:0010604)	9/276	0.0748319	0.289663	0	0	1.79281	4.64789	AHI1;NTRK2;CAMK2N1;FUBP1;FMR1;RPS3;UBAP2L;VPS35;PHB
negative regulation of cell migration (GO:0030336)	5/121	0.0763037	0.294816	0	0	2.2853	5.88016	LRP1;TPM1;DAB2IP;THY1;CORO1C
negative regulation of cellular process (GO:0048523)	15/534	0.0766204	0.29482	0	0	1.54261	3.9628	CDKN1B;ATP8A2;DAB2IP;NEDD4L;CASK;PHB;SIRT2;SNX3;DLG3;CAMK2N1;ERBB4;WDR6;CDH13;VPS35;HRAS
regulation of voltage-gated calcium channel activity (GO:1901385)	2021-02-25	0.0785531	0.29482	0	0	4.59487	11.6893	FMR1;HPCA
regulation of telomere maintenance (GO:0032204)	2021-02-25	0.0785531	0.29482	0	0	4.59487	11.6893	DHX36;HNRNPD
response to amyloid-beta (GO:1904645)	2021-02-25	0.0785531	0.29482	0	0	4.59487	11.6893	PRNP;LRP1
positive regulation of filopodium assembly (GO:0051491)	2021-02-25	0.0785531	0.29482	0	0	4.59487	11.6893	NLGN1;FMR1
response to alcohol (GO:0097305)	2021-02-25	0.0785531	0.29482	0	0	4.59487	11.6893	GPRIN1;GRIN2B
positive regulation of glucose transport (GO:0010828)	2021-02-25	0.0785531	0.29482	0	0	4.59487	11.6893	SORBS1;ARPP19
regulation of viral release from host cell (GO:1902186)	2021-02-25	0.0785531	0.29482	0	0	4.59487	11.6893	DDB1;TRIM28
negative regulation of insulin receptor signaling pathway (GO:0046627)	2021-02-25	0.0785531	0.29482	0	0	4.59487	11.6893	PTPRE;INPP5K
respiratory tube development (GO:0030323)	44252	0.0785531	0.29482	0	0	4.59487	11.6893	BAG6;ITGA3
protein depolymerization (GO:0051261)	2021-02-25	0.0785531	0.29482	0	0	4.59487	11.6893	MICAL3;DSTN
negative regulation of locomotion (GO:0040013)	2021-02-25	0.0785531	0.29482	0	0	4.59487	11.6893	TRIM28;PIN1
peptidyl-tyrosine dephosphorylation (GO:0035335)	2021-02-25	0.0785531	0.29482	0	0	4.59487	11.6893	PTPRZ1;PGP
regulation of vascular smooth muscle cell proliferation (GO:1904705)	2021-02-25	0.0785531	0.29482	0	0	4.59487	11.6893	CDKN1B;TPM1
positive regulation of nitric oxide biosynthetic process (GO:0045429)	2021-02-25	0.0785531	0.29482	0	0	4.59487	11.6893	HSP90AA1;HSP90AB1
positive regulation of nitric oxide metabolic process (GO:1904407)	2021-02-25	0.0785531	0.29482	0	0	4.59487	11.6893	HSP90AA1;HSP90AB1
negative regulation of cell proliferation (GO:0008285)	11/363	0.0791703	0.296606	0	0	1.66393	4.21999	CDKN1B;ATP8A2;DLG3;CAMK2N1;ERBB4;DAB2IP;WDR6;CDH13;PHB;HRAS;SIRT2
action potential (GO:0001508)	19784	0.0796154	0.296988	0	0	3.11224	7.87568	GNA11;GNAQ;YWHAH
positive regulation of response to stimulus (GO:0048584)	19784	0.0796154	0.296988	0	0	3.11224	7.87568	DDX5;HOMER1;FMR1
calcium ion homeostasis (GO:0055074)	31868	0.079697	0.296988	0	0	2.55252	6.45666	SLC24A3;VAPB;GPRIN1;ATP2B1
negative regulation of intracellular signal transduction (GO:1902532)	6/161	0.0814665	0.303044	0	0	2.05383	5.1501	PLEKHA1;USP10;CPNE1;ITPR1;DAB2IP;INPP5K
regulation of axonogenesis (GO:0050770)	1955-03-01	0.0830982	0.308566	0	0	3.05223	7.59314	NTRK2;OMG;THY1
apoptotic cell clearance (GO:0043277)	2021-02-26	0.0840848	0.309491	0	0	4.40319	10.902	TMX3;LRP1
cytoskeleton-dependent intracellular transport (GO:0030705)	2021-02-26	0.0840848	0.309491	0	0	4.40319	10.902	TUBA1B;HOOK3
response to gamma radiation (GO:0010332)	2021-02-26	0.0840848	0.309491	0	0	4.40319	10.902	RPL26;HRAS
regulation of supramolecular fiber organization (GO:1902903)	2021-02-26	0.0840848	0.309491	0	0	4.40319	10.902	MAP2;MAP1A
negative regulation of cellular response to insulin stimulus (GO:1900077)	2021-02-26	0.0840848	0.309491	0	0	4.40319	10.902	PTPRE;INPP5K
SRP-dependent cotranslational protein targeting to membrane (GO:0006614)	1989-04-01	0.0850024	0.312149	0	0	2.4922	6.14347	RPS3;RPS3A;SEC61B;RPL26
regulation of protein kinase B signaling (GO:0051896)	6/163	0.0852534	0.312149	0	0	2.02746	4.99186	OSBPL8;PLEKHA1;ERBB4;CPNE1;CNTN1;INPP5K
positive regulation of protein modification process (GO:0031401)	6/163	0.0852534	0.312149	0	0	2.02746	4.99186	NTRK2;ERBB4;FMR1;PIN1;HRAS;RAB3GAP1
negative regulation of cellular catabolic process (GO:0031330)	20515	0.0866454	0.316143	0	0	2.99449	7.32432	DAB2IP;WDR6;SIRT2
cellular iron ion homeostasis (GO:0006879)	20515	0.0866454	0.316143	0	0	2.99449	7.32432	ATP6V1G1;TFRC;SKP1
cell-matrix adhesion (GO:0007160)	32964	0.0877183	0.319502	0	0	2.4631	5.99426	TIMM10B;ITGA3;THY1;SORBS1
vesicle organization (GO:0016050)	5/127	0.0894324	0.320162	0	0	2.17224	5.24439	EEA1;STX12;SORT1;HOOK3;SQSTM1
negative regulation of response to stimulus (GO:0048585)	5/127	0.0894324	0.320162	0	0	2.17224	5.24439	NTRK2;ERBB4;CASK;LMTK2;THY1
telomere maintenance via telomere lengthening (GO:0010833)	2021-02-27	0.0897309	0.320162	0	0	4.22685	10.1907	HSP90AA1;HSP90AB1
negative regulation of smooth muscle cell proliferation (GO:0048662)	44254	0.0897309	0.320162	0	0	4.22685	10.1907	CDKN1B;TPM1
negative regulation of microtubule polymerization or depolymerization (GO:0031111)	2021-02-27	0.0897309	0.320162	0	0	4.22685	10.1907	TUBB4A;HDGFL3
phagosome acidification (GO:0090383)	44254	0.0897309	0.320162	0	0	4.22685	10.1907	ATP6V1G1;RAB7A
negative regulation of cell-matrix adhesion (GO:0001953)	2021-02-27	0.0897309	0.320162	0	0	4.22685	10.1907	CASK;CORO1C
microtubule polymerization (GO:0046785)	44254	0.0897309	0.320162	0	0	4.22685	10.1907	ZNF207;HDGFL3
extrinsic apoptotic signaling pathway via death domain receptors (GO:0008625)	44254	0.0897309	0.320162	0	0	4.22685	10.1907	SORT1;DAB2IP
regulation of protein transport (GO:0051223)	2021-02-27	0.0897309	0.320162	0	0	4.22685	10.1907	SNX3;STXBP5
regulation of protein targeting to membrane (GO:0090313)	2021-02-27	0.0897309	0.320162	0	0	4.22685	10.1907	PRNP;INPP5K
cellular response to glucose stimulus (GO:0071333)	2021-02-27	0.0897309	0.320162	0	0	4.22685	10.1907	RAB11FIP5;RAB11B
regulation of neurogenesis (GO:0050767)	20880	0.0902557	0.321488	0	0	2.93889	7.06835	NLGN1;HOOK3;YWHAH
phospholipase C-activating G-protein coupled receptor signaling pathway (GO:0007200)	33329	0.0904757	0.321726	0	0	2.43466	5.8497	HOMER1;GNA11;GNAQ;GRM1
regulation of ERK1 and ERK2 cascade (GO:0070372)	8/247	0.0923539	0.327849	0	0	1.778	4.23543	NTRK2;CAMK2N1;ERBB4;DAB2IP;LMTK2;PIN1;PHB;HRAS
neuron projection extension (GO:1990138)	2021-02-28	0.0954852	0.334001	0	0	4.06407	9.54562	ALCAM;CPNE1
cellular response to hydrogen peroxide (GO:0070301)	2021-02-28	0.0954852	0.334001	0	0	4.06407	9.54562	PLEKHA1;RPS3
negative regulation of proteasomal protein catabolic process (GO:1901799)	2021-02-28	0.0954852	0.334001	0	0	4.06407	9.54562	BAG6;HSP90AB1
regulation of mRNA processing (GO:0050684)	44255	0.0954852	0.334001	0	0	4.06407	9.54562	AHCYL1;SRSF3
positive regulation of protein tyrosine kinase activity (GO:0061098)	44255	0.0954852	0.334001	0	0	4.06407	9.54562	PRNP;DLG3
regulation of transmembrane receptor protein serine/threonine kinase signaling pathway (GO:0090092)	2021-02-28	0.0954852	0.334001	0	0	4.06407	9.54562	ITGA3;PIN1
neural crest cell migration (GO:0001755)	2021-02-28	0.0954852	0.334001	0	0	4.06407	9.54562	ERBB4;CORO1C
cellular transition metal ion homeostasis (GO:0046916)	34060	0.0961136	0.334001	0	0	2.37971	5.57381	PRNP;ATP6V1G1;TFRC;SKP1
protein localization to plasma membrane (GO:0072659)	5/130	0.0964087	0.334001	0	0	2.11978	4.95851	DPP6;RILPL1;EPB41L3;KCNIP4;INPP5K
regulation of intracellular signal transduction (GO:1902531)	12/422	0.0984721	0.334001	0	0	1.55803	3.61149	PRMT5;ARHGAP32;ARHGEF9;NLGN1;CPNE1;DAB2IP;PIN1;AKAP5;KALRN;PAK2;SQSTM1;GNAI1
respiratory electron transport chain (GO:0022904)	1994-04-01	0.0989932	0.334001	0	0	2.35315	5.44213	NDUFA8;NDUFB10;CYC1;SLC25A12
negative regulation of cellular macromolecule biosynthetic process (GO:2000113)	14/512	0.100049	0.334001	0	0	1.49795	3.44842	KHDRBS1;USP47;CDKN1B;FMR1;DAB2IP;PHB;SIRT2;FXR1;SYNCRIP;ILF3;GCLC;TRIM28;RPS3;INPP5K
nucleotide-excision repair, preincision complex assembly (GO:0006294)	2029-02-01	0.101342	0.334001	0	0	3.91335	8.95866	DDB1;RBX1
synaptic vesicle endocytosis (GO:0048488)	47150	0.101342	0.334001	0	0	3.91335	8.95866	NLGN1;CANX
lung development (GO:0030324)	47150	0.101342	0.334001	0	0	3.91335	8.95866	BAG6;ITGA3
vacuolar transport (GO:0007034)	2029-02-01	0.101342	0.334001	0	0	3.91335	8.95866	VPS41;VTI1B
cortical cytoskeleton organization (GO:0030865)	2029-02-01	0.101342	0.334001	0	0	3.91335	8.95866	NLGN1;EPB41L3
coenzyme biosynthetic process (GO:0009108)	2029-02-01	0.101342	0.334001	0	0	3.91335	8.95866	PDXK;GPHN
nuclear-transcribed mRNA poly(A) tail shortening (GO:0000289)	2029-02-01	0.101342	0.334001	0	0	3.91335	8.95866	EIF4A2;EIF4A1
synaptic vesicle recycling (GO:0036465)	2029-02-01	0.101342	0.334001	0	0	3.91335	8.95866	NLGN1;CANX
respiratory system development (GO:0060541)	47150	0.101342	0.334001	0	0	3.91335	8.95866	BAG6;ITGA3
positive regulation of hydrolase activity (GO:0051345)	6/172	0.103469	0.334001	0	0	1.91665	4.34789	TPM1;RPS3;PIN1;THY1;HRAS;RAB3GAP1
ciliary basal body-plasma membrane docking (GO:0097711)	1996-04-01	0.104871	0.334001	0	0	2.30176	5.19051	AHI1;HSP90AA1;TUBB4B;TUBB4A
cellular metal ion homeostasis (GO:0006875)	35156	0.104871	0.334001	0	0	2.30176	5.19051	SLC24A3;VAPB;NEDD4L;ATP2B1
regulation of vesicle fusion (GO:0031338)	22341	0.105303	0.334001	0	0	2.73565	6.15772	RABGAP1L;RABGAP1;VPS41
negative regulation of viral life cycle (GO:1903901)	22341	0.105303	0.334001	0	0	2.73565	6.15772	SNX3;ILF3;TRIM28
RNA 3'-end processing (GO:0031123)	1961-03-01	0.105303	0.334001	0	0	2.73565	6.15772	SRSF1;SRSF2;SRSF3
positive regulation of nucleobase-containing compound transport (GO:0032241)	2021-01-06	0.106823	0.334001	0	0	10.5495	23.5947	KHDRBS1
pyrimidine-containing compound biosynthetic process (GO:0072528)	2021-01-06	0.106823	0.334001	0	0	10.5495	23.5947	PRPS1
protein localization to non-motile cilium (GO:0097499)	2021-01-06	0.106823	0.334001	0	0	10.5495	23.5947	TUB
positive regulation of cellular extravasation (GO:0002693)	2021-01-06	0.106823	0.334001	0	0	10.5495	23.5947	THY1
neuron projection maintenance (GO:1990535)	44202	0.106823	0.334001	0	0	10.5495	23.5947	PRNP
vocal learning (GO:0042297)	44202	0.106823	0.334001	0	0	10.5495	23.5947	SHANK3
negative regulation of mRNA catabolic process (GO:1902373)	2021-01-06	0.106823	0.334001	0	0	10.5495	23.5947	FMR1
regulation of protein depolymerization (GO:1901879)	2021-01-06	0.106823	0.334001	0	0	10.5495	23.5947	MAP1A
regulation of non-motile cilium assembly (GO:1902855)	2021-01-06	0.106823	0.334001	0	0	10.5495	23.5947	MAP4
negative regulation of transforming growth factor beta production (GO:0071635)	2021-01-06	0.106823	0.334001	0	0	10.5495	23.5947	HSP90AB1
negative regulation of translation in response to stress (GO:0032055)	2021-01-06	0.106823	0.334001	0	0	10.5495	23.5947	EIF2S1
SRP-dependent cotranslational protein targeting to membrane, translocation (GO:0006616)	2021-01-06	0.106823	0.334001	0	0	10.5495	23.5947	SEC61B
viral release from host cell (GO:0019076)	2021-01-06	0.106823	0.334001	0	0	10.5495	23.5947	RAB7A
positive regulation of amyloid-beta clearance (GO:1900223)	44202	0.106823	0.334001	0	0	10.5495	23.5947	LRP1
purine nucleobase biosynthetic process (GO:0009113)	44202	0.106823	0.334001	0	0	10.5495	23.5947	PRPS1
chromatin silencing at telomere (GO:0006348)	2021-01-06	0.106823	0.334001	0	0	10.5495	23.5947	SIRT2
positive regulation of humoral immune response (GO:0002922)	2021-01-06	0.106823	0.334001	0	0	10.5495	23.5947	PHB
regulation of adiponectin secretion (GO:0070163)	2021-01-06	0.106823	0.334001	0	0	10.5495	23.5947	RAB11FIP5
negative regulation of protein targeting to membrane (GO:0090315)	44202	0.106823	0.334001	0	0	10.5495	23.5947	INPP5K
negative regulation of glucocorticoid receptor signaling pathway (GO:2000323)	2021-01-06	0.106823	0.334001	0	0	10.5495	23.5947	PHB
phagosome-lysosome fusion (GO:0090385)	2021-01-06	0.106823	0.334001	0	0	10.5495	23.5947	RAB7A
iron ion import (GO:0097286)	2021-01-06	0.106823	0.334001	0	0	10.5495	23.5947	TFRC
retinal ganglion cell axon guidance (GO:0031290)	2021-01-06	0.106823	0.334001	0	0	10.5495	23.5947	ALCAM
negative regulation of neural precursor cell proliferation (GO:2000178)	2021-01-06	0.106823	0.334001	0	0	10.5495	23.5947	SIRT2
negative regulation of phospholipid metabolic process (GO:1903726)	2021-01-06	0.106823	0.334001	0	0	10.5495	23.5947	DAB2IP
exit from host cell (GO:0035891)	2021-01-06	0.106823	0.334001	0	0	10.5495	23.5947	RAB7A
negative regulation of dendritic spine development (GO:0061000)	2021-01-06	0.106823	0.334001	0	0	10.5495	23.5947	NLGN1
regulation of protein localization to cell cortex (GO:1904776)	2021-01-06	0.106823	0.334001	0	0	10.5495	23.5947	GNAI1
regulation of interferon-alpha secretion (GO:1902739)	44202	0.106823	0.334001	0	0	10.5495	23.5947	DHX36
positive regulation of RNA export from nucleus (GO:0046833)	2021-01-06	0.106823	0.334001	0	0	10.5495	23.5947	KHDRBS1
response to lead ion (GO:0010288)	2021-01-06	0.106823	0.334001	0	0	10.5495	23.5947	PPP1CA
adenylate cyclase-inhibiting G-protein coupled glutamate receptor signaling pathway (GO:0007196)	2021-01-06	0.106823	0.334001	0	0	10.5495	23.5947	GRM1
mRNA 5'-splice site recognition (GO:0000395)	2021-01-06	0.106823	0.334001	0	0	10.5495	23.5947	SRSF1
corticosteroid receptor signaling pathway (GO:0031958)	2021-01-06	0.106823	0.334001	0	0	10.5495	23.5947	YWHAH
positive regulation of histone phosphorylation (GO:0033129)	2021-01-06	0.106823	0.334001	0	0	10.5495	23.5947	FMR1
negative regulation of cytoplasmic translation (GO:2000766)	2021-01-06	0.106823	0.334001	0	0	10.5495	23.5947	FMR1
vesicle fusion with Golgi apparatus (GO:0048280)	2021-01-06	0.106823	0.334001	0	0	10.5495	23.5947	VTI1B
negative regulation of calcium ion-dependent exocytosis (GO:0045955)	2021-01-06	0.106823	0.334001	0	0	10.5495	23.5947	FMR1
aggrephagy (GO:0035973)	2021-01-06	0.106823	0.334001	0	0	10.5495	23.5947	SQSTM1
positive regulation of clathrin-dependent endocytosis (GO:2000370)	2021-01-06	0.106823	0.334001	0	0	10.5495	23.5947	NLGN1
positive regulation of interferon-alpha secretion (GO:1902741)	2021-01-06	0.106823	0.334001	0	0	10.5495	23.5947	DHX36
regulation of anion channel activity (GO:0010359)	2021-01-06	0.106823	0.334001	0	0	10.5495	23.5947	PRNP
imitative learning (GO:0098596)	2021-01-06	0.106823	0.334001	0	0	10.5495	23.5947	SHANK3
negative regulation of DNA repair (GO:0045738)	44202	0.106823	0.334001	0	0	10.5495	23.5947	RPS3
monoubiquitinated protein deubiquitination (GO:0035520)	2021-01-06	0.106823	0.334001	0	0	10.5495	23.5947	USP47
regulation of lysosomal protein catabolic process (GO:1905165)	2021-01-06	0.106823	0.334001	0	0	10.5495	23.5947	LRP1
nucleoside phosphate catabolic process (GO:1901292)	2021-01-06	0.106823	0.334001	0	0	10.5495	23.5947	ITPA
long term synaptic depression (GO:0060292)	44202	0.106823	0.334001	0	0	10.5495	23.5947	SHANK2
astrocyte activation (GO:0048143)	2021-01-06	0.106823	0.334001	0	0	10.5495	23.5947	LRP1
glucocorticoid receptor signaling pathway (GO:0042921)	44202	0.106823	0.334001	0	0	10.5495	23.5947	YWHAH
endoplasmic reticulum membrane organization (GO:0090158)	2021-01-06	0.106823	0.334001	0	0	10.5495	23.5947	ATL2
negative regulation of glycogen biosynthetic process (GO:0045719)	2021-01-06	0.106823	0.334001	0	0	10.5495	23.5947	INPP5K
dendritic spine maintenance (GO:0097062)	44202	0.106823	0.334001	0	0	10.5495	23.5947	PRNP
phosphatidylinositol 3-kinase signaling (GO:0014065)	10990	0.107295	0.334479	0	0	3.77339	8.42287	PLEKHA1;SIRT2
regulation of sodium ion transmembrane transport (GO:1902305)	10990	0.107295	0.334479	0	0	3.77339	8.42287	NEDD4L;YWHAH
cellular response to organonitrogen compound (GO:0071417)	35521	0.107869	0.33577	0	0	2.27689	5.07027	GABRB3;GABRB2;GABRB1;INPP5K
cellular response to organic cyclic compound (GO:0071407)	5/135	0.108628	0.337633	0	0	2.03773	4.5234	GABRB3;GABRB2;GABRB1;INPP5K;GNAI1
cellular protein catabolic process (GO:0044257)	1962-03-01	0.109209	0.338936	0	0	2.68914	5.95508	PSMA6;DAB2IP;RAB7A
phosphatidylinositol biosynthetic process (GO:0006661)	1998-04-01	0.110905	0.339101	0	0	2.25255	4.95355	DPM1;PLEKHA1;SACM1L;INPP5K
iron ion homeostasis (GO:0055072)	1963-03-01	0.113171	0.339101	0	0	2.64419	5.7613	ATP6V1G1;TFRC;SKP1
regulation of viral genome replication (GO:0045069)	1963-03-01	0.113171	0.339101	0	0	2.64419	5.7613	DDB1;ILF3;VAPB
regulation of proteolysis (GO:0030162)	1963-03-01	0.113171	0.339101	0	0	2.64419	5.7613	BAG6;TRAF3;CAMK2N1
nuclear-transcribed mRNA catabolic process, deadenylation-dependent decay (GO:0000288)	23071	0.113171	0.339101	0	0	2.64419	5.7613	EIF4A2;EIF4A1;DDX6
regulation of glucose import (GO:0046324)	11355	0.113339	0.339101	0	0	3.64309	7.93237	SORBS1;ARPP19
positive regulation of protein dephosphorylation (GO:0035307)	1931-02-01	0.113339	0.339101	0	0	3.64309	7.93237	HSP90AB1;PIN1
renal water homeostasis (GO:0003091)	11355	0.113339	0.339101	0	0	3.64309	7.93237	PRKAR1B;PRKAR1A
positive regulation of intracellular signal transduction (GO:1902533)	13/479	0.114718	0.339101	0	0	1.48482	3.21504	OSBPL8;NTRK2;NLGN1;DAB2IP;LMTK2;ACTN4;ZDHHC17;ERBB4;CPNE1;RPS3;CNTN1;CDH13;HRAS
regulation of vesicle-mediated transport (GO:0060627)	5/138	0.116305	0.339101	0	0	1.99146	4.2847	RABGAP1L;RABGAP1;CDH13;STXBP5;RAB11B
mRNA-containing ribonucleoprotein complex export from nucleus (GO:0071427)	4/100	0.117089	0.339101	0	0	2.2054	4.73018	SRSF1;HNRNPA2B1;SRSF2;SRSF3
cellular response to growth factor stimulus (GO:0071363)	5/139	0.11892	0.339101	0	0	1.9765	4.20856	EEF1A1;NTRK2;DAB2IP;INPP5K;SIRT2
positive regulation of cell motility (GO:2000147)	6/179	0.118929	0.339101	0	0	1.83843	3.91445	CNTN1;ELP1;CDH13;ELP3;ACTN4;HRAS
protein deacetylation (GO:0006476)	1932-02-01	0.119468	0.339101	0	0	3.52147	7.48209	PHB;SIRT2
positive regulation of calcium ion transport into cytosol (GO:0010524)	11720	0.119468	0.339101	0	0	3.52147	7.48209	GPRIN1;THY1
cellular response to glucagon stimulus (GO:0071377)	11720	0.119468	0.339101	0	0	3.52147	7.48209	PRKAR1B;PRKAR1A
central nervous system neuron differentiation (GO:0021953)	1932-02-01	0.119468	0.339101	0	0	3.52147	7.48209	NTRK2;MAP2
phagosome maturation (GO:0090382)	1932-02-01	0.119468	0.339101	0	0	3.52147	7.48209	ATP6V1G1;RAB7A
positive regulation of telomere maintenance via telomerase (GO:0032212)	1932-02-01	0.119468	0.339101	0	0	3.52147	7.48209	CCT7;CCT4
global genome nucleotide-excision repair (GO:0070911)	1932-02-01	0.119468	0.339101	0	0	3.52147	7.48209	DDB1;RBX1
regulation of kinase activity (GO:0043549)	4/101	0.120237	0.339101	0	0	2.18255	4.62328	NTRK2;CDKN1B;ERBB4;LMTK2
intrinsic apoptotic signaling pathway (GO:0097193)	4/101	0.120237	0.339101	0	0	2.18255	4.62328	BAG6;DDX5;ITPR1;DAB2IP
endocytosis (GO:0006897)	8/263	0.120244	0.339101	0	0	1.66507	3.527	EEA1;HSP90AA1;LRP1;CSNK1A1;SORT1;M6PR;RAB7A;CORO1C
positive regulation of cell migration (GO:0030335)	7/221	0.120608	0.339101	0	0	1.73499	3.66986	ELP1;DAB2IP;CNTN1;CDH13;ELP3;ACTN4;HRAS
mitotic cell cycle phase transition (GO:0044772)	7/221	0.120608	0.339101	0	0	1.73499	3.66986	KHDRBS1;HSP90AA1;CDKN1B;TUBB4B;ARPP19;TUBB4A;SKP1
cellular response to reactive oxygen species (GO:0034614)	23802	0.121256	0.339101	0	0	2.55863	5.39834	PLEKHA1;TPM1;RPS3
angiotensin-activated signaling pathway (GO:0038166)	44203	0.123486	0.339101	0	0	8.79077	18.387	AHCYL1
protein localization to basolateral plasma membrane (GO:1903361)	44203	0.123486	0.339101	0	0	8.79077	18.387	PDZD11
purine nucleotide biosynthetic process (GO:0006164)	2021-01-07	0.123486	0.339101	0	0	8.79077	18.387	PRPS1
regulation of entry of bacterium into host cell (GO:2000535)	2021-01-07	0.123486	0.339101	0	0	8.79077	18.387	EXOC7
progesterone receptor signaling pathway (GO:0050847)	2021-01-07	0.123486	0.339101	0	0	8.79077	18.387	PHB
negative regulation of keratinocyte proliferation (GO:0010839)	2021-01-07	0.123486	0.339101	0	0	8.79077	18.387	CASK
positive regulation of lipid transport (GO:0032370)	44203	0.123486	0.339101	0	0	8.79077	18.387	LRP1
positive regulation of lamellipodium morphogenesis (GO:2000394)	44203	0.123486	0.339101	0	0	8.79077	18.387	CORO1C
positive regulation of glutamate receptor signaling pathway (GO:1900451)	2021-01-07	0.123486	0.339101	0	0	8.79077	18.387	SHANK3
regulation of endocytic recycling (GO:2001135)	2021-01-07	0.123486	0.339101	0	0	8.79077	18.387	RAB11B
regulation of extracellular matrix organization (GO:1903053)	2021-01-07	0.123486	0.339101	0	0	8.79077	18.387	LRP1
cellular ion homeostasis (GO:0006873)	2021-01-07	0.123486	0.339101	0	0	8.79077	18.387	SLC12A5
pri-miRNA transcription from RNA polymerase II promoter (GO:0061614)	2021-01-07	0.123486	0.339101	0	0	8.79077	18.387	DDX5
protein localization to ciliary membrane (GO:1903441)	2021-01-07	0.123486	0.339101	0	0	8.79077	18.387	TUB
vesicle transport along actin filament (GO:0030050)	2021-01-07	0.123486	0.339101	0	0	8.79077	18.387	ACTN4
regulation of low-density lipoprotein particle clearance (GO:0010988)	2021-01-07	0.123486	0.339101	0	0	8.79077	18.387	HNRNPK
posttranslational protein targeting to endoplasmic reticulum membrane (GO:0006620)	2021-01-07	0.123486	0.339101	0	0	8.79077	18.387	SEC61B
cytoplasmic sequestering of NF-kappaB (GO:0007253)	2021-01-07	0.123486	0.339101	0	0	8.79077	18.387	G3BP2
left/right pattern formation (GO:0060972)	2021-01-07	0.123486	0.339101	0	0	8.79077	18.387	AHI1
negative regulation of striated muscle tissue development (GO:0045843)	44203	0.123486	0.339101	0	0	8.79077	18.387	SIRT2
retrograde axonal transport (GO:0008090)	44203	0.123486	0.339101	0	0	8.79077	18.387	NEFL
regulation of sterol transport (GO:0032371)	2021-01-07	0.123486	0.339101	0	0	8.79077	18.387	LRP1
molybdopterin cofactor metabolic process (GO:0043545)	2021-01-07	0.123486	0.339101	0	0	8.79077	18.387	GPHN
activation of MAPKKK activity (GO:0000185)	2021-01-07	0.123486	0.339101	0	0	8.79077	18.387	DAB2IP
regulation of isotype switching (GO:0045191)	2021-01-07	0.123486	0.339101	0	0	8.79077	18.387	TFRC
negative regulation of platelet-derived growth factor receptor-beta signaling pathway (GO:2000587)	2021-01-07	0.123486	0.339101	0	0	8.79077	18.387	LRP1
retinoic acid receptor signaling pathway (GO:0048384)	44203	0.123486	0.339101	0	0	8.79077	18.387	ACTN4
regulation of response to biotic stimulus (GO:0002831)	2021-01-07	0.123486	0.339101	0	0	8.79077	18.387	TRAF3
phosphorylated carbohydrate dephosphorylation (GO:0046838)	2021-01-07	0.123486	0.339101	0	0	8.79077	18.387	INPP5K
L-cysteine metabolic process (GO:0046439)	2021-01-07	0.123486	0.339101	0	0	8.79077	18.387	AHCYL1
negative regulation of protein kinase activity by regulation of protein phosphorylation (GO:0044387)	2021-01-07	0.123486	0.339101	0	0	8.79077	18.387	CORO1C
morphogenesis of a polarized epithelium (GO:0001738)	2021-01-07	0.123486	0.339101	0	0	8.79077	18.387	AHI1
regulation of low-density lipoprotein particle receptor biosynthetic process (GO:0045714)	44203	0.123486	0.339101	0	0	8.79077	18.387	HNRNPK
cellular response to hydroxyurea (GO:0072711)	2021-01-07	0.123486	0.339101	0	0	8.79077	18.387	FMR1
inositol phosphate dephosphorylation (GO:0046855)	2021-01-07	0.123486	0.339101	0	0	8.79077	18.387	INPP5K
positive regulation of urine volume (GO:0035810)	2021-01-07	0.123486	0.339101	0	0	8.79077	18.387	INPP5K
protein localization to cytoplasmic stress granule (GO:1903608)	2021-01-07	0.123486	0.339101	0	0	8.79077	18.387	DDX1
modification by symbiont of host morphology or physiology (GO:0044003)	2021-01-07	0.123486	0.339101	0	0	8.79077	18.387	VAPB
peroxisome proliferator activated receptor signaling pathway (GO:0035357)	2021-01-07	0.123486	0.339101	0	0	8.79077	18.387	ACTN4
negative regulation of nitric oxide metabolic process (GO:1904406)	2021-01-07	0.123486	0.339101	0	0	8.79077	18.387	KHSRP
peptidyl-lysine deacetylation (GO:0034983)	2021-01-07	0.123486	0.339101	0	0	8.79077	18.387	SIRT2
regulation by virus of viral protein levels in host cell (GO:0046719)	2021-01-07	0.123486	0.339101	0	0	8.79077	18.387	DDB1
regulation of RNA biosynthetic process (GO:2001141)	2021-01-07	0.123486	0.339101	0	0	8.79077	18.387	ACTN4
regulation of meiotic nuclear division (GO:0040020)	2021-01-07	0.123486	0.339101	0	0	8.79077	18.387	SIRT2
negative regulation of receptor internalization (GO:0002091)	2021-01-07	0.123486	0.339101	0	0	8.79077	18.387	ATXN2
positive regulation of tumor necrosis factor-mediated signaling pathway (GO:1903265)	2021-01-07	0.123486	0.339101	0	0	8.79077	18.387	CPNE1
regulation of glucocorticoid receptor signaling pathway (GO:2000322)	2021-01-07	0.123486	0.339101	0	0	8.79077	18.387	PHB
ion homeostasis (GO:0050801)	2021-01-07	0.123486	0.339101	0	0	8.79077	18.387	SLC12A5
negative regulation of glycogen metabolic process (GO:0070874)	2021-01-07	0.123486	0.339101	0	0	8.79077	18.387	INPP5K
regulation of anion transport (GO:0044070)	2021-01-07	0.123486	0.339101	0	0	8.79077	18.387	RAB11B
adenylate cyclase-activating dopamine receptor signaling pathway (GO:0007191)	2021-01-07	0.123486	0.339101	0	0	8.79077	18.387	GNAS
G-quadruplex DNA unwinding (GO:0044806)	2021-01-07	0.123486	0.339101	0	0	8.79077	18.387	HNRNPA2B1
negative regulation of nitric oxide biosynthetic process (GO:0045019)	2021-01-07	0.123486	0.339101	0	0	8.79077	18.387	KHSRP
molybdopterin cofactor biosynthetic process (GO:0032324)	44203	0.123486	0.339101	0	0	8.79077	18.387	GPHN
outer mitochondrial membrane organization (GO:0007008)	2021-01-07	0.123486	0.339101	0	0	8.79077	18.387	HSP90AA1
response to increased oxygen levels (GO:0036296)	2021-01-07	0.123486	0.339101	0	0	8.79077	18.387	ATP6V1G1
regulation of glycogen (starch) synthase activity (GO:2000465)	2021-01-07	0.123486	0.339101	0	0	8.79077	18.387	INPP5K
regulation of protein heterodimerization activity (GO:0043497)	2021-01-07	0.123486	0.339101	0	0	8.79077	18.387	DAB2IP
negative regulation of dendrite development (GO:2000171)	2021-01-07	0.123486	0.339101	0	0	8.79077	18.387	YWHAH
membrane invagination (GO:0010324)	44203	0.123486	0.339101	0	0	8.79077	18.387	SNX3
long-chain fatty acid import (GO:0044539)	2021-01-07	0.123486	0.339101	0	0	8.79077	18.387	ACSL1
regulation of cellular response to insulin stimulus (GO:1900076)	44203	0.123486	0.339101	0	0	8.79077	18.387	NUCKS1
axonogenesis (GO:0007409)	7/223	0.12476	0.341544	0	0	1.71874	3.57733	TUBB3;MAP1A;OMG;TNR;HRAS;NEFH;SHANK3
intracellular steroid hormone receptor signaling pathway (GO:0030518)	1966-03-01	0.125375	0.341544	0	0	2.51789	5.22825	DDX17;DDX5;PHB
intracellular pH reduction (GO:0051452)	1933-02-01	0.125678	0.341544	0	0	3.4077	7.06769	ATP6V1G1;RAB7A
regulation of cell-substrate adhesion (GO:0010810)	12086	0.125678	0.341544	0	0	3.4077	7.06769	THY1;CORO1C
positive regulation of cell-matrix adhesion (GO:0001954)	12086	0.125678	0.341544	0	0	3.4077	7.06769	CDH13;THY1
intra-Golgi vesicle-mediated transport (GO:0006891)	12086	0.125678	0.341544	0	0	3.4077	7.06769	COPB1;VTI1B
platelet aggregation (GO:0070527)	1933-02-01	0.125678	0.341544	0	0	3.4077	7.06769	RAP2B;GNAS
establishment or maintenance of epithelial cell apical/basal polarity (GO:0045197)	1933-02-01	0.125678	0.341544	0	0	3.4077	7.06769	DLG3;PDZD11
phosphate-containing compound metabolic process (GO:0006796)	6/183	0.128252	0.344749	0	0	1.79652	3.68962	GFPT1;PGP;INPP5K;PAK2;PFKM;PPP1CA
regulation of gene silencing by miRNA (GO:0060964)	1967-03-01	0.129545	0.344749	0	0	2.47842	5.06521	FXR1;FMR1;ELAVL1
regulation of cardiac conduction (GO:1903779)	1967-03-01	0.129545	0.344749	0	0	2.47842	5.06521	AHCYL1;ITPR1;ATP2B1
negative regulation of DNA binding (GO:0043392)	1934-02-01	0.131962	0.344749	0	0	3.30104	6.6854	CPNE1;HABP4
negative regulation of cellular metabolic process (GO:0031324)	12451	0.131962	0.344749	0	0	3.30104	6.6854	ATXN2;SIRT2
ncRNA metabolic process (GO:0034660)	1934-02-01	0.131962	0.344749	0	0	3.30104	6.6854	DDX17;KHSRP
positive regulation of exocytosis (GO:0045921)	1934-02-01	0.131962	0.344749	0	0	3.30104	6.6854	STXBP5;RAB7A
regulation of wound healing (GO:0061041)	1934-02-01	0.131962	0.344749	0	0	3.30104	6.6854	CASK;HRAS
regulation of JUN kinase activity (GO:0043506)	1934-02-01	0.131962	0.344749	0	0	3.30104	6.6854	RPS3;DAB2IP
response to peptide (GO:1901652)	1934-02-01	0.131962	0.344749	0	0	3.30104	6.6854	PRNP;GNAI1
response to glucagon (GO:0033762)	1934-02-01	0.131962	0.344749	0	0	3.30104	6.6854	PRKAR1B;PRKAR1A
cellular protein complex assembly (GO:0043623)	5/144	0.132404	0.344749	0	0	1.90491	3.85153	HSP90AA1;PSMD11;HSP90AB1;SKP1;RBX1
mRNA export from nucleus (GO:0006406)	4/105	0.133184	0.344749	0	0	2.09568	4.22495	SRSF1;HNRNPA2B1;SRSF2;SRSF3
COPII-coated vesicle budding (GO:0090114)	1968-03-01	0.133763	0.344749	0	0	2.44017	4.90884	GRIA1;SAR1A;VAPB
Golgi vesicle transport (GO:0048193)	8/271	0.135694	0.344749	0	0	1.61375	3.22323	GRIA1;LMAN2L;VAPB;LMAN2;CAPZA1;COPB1;MYO18A;VTI1B
positive regulation of neurogenesis (GO:0050769)	25263	0.138029	0.344749	0	0	2.40307	4.75879	CPNE1;DAB2IP;SHANK3
regulation of endocytosis (GO:0030100)	1969-03-01	0.138029	0.344749	0	0	2.40307	4.75879	LRP1;CDH13;NEDD4L
positive regulation of plasma membrane bounded cell projection assembly (GO:0120034)	1969-03-01	0.138029	0.344749	0	0	2.40307	4.75879	NLGN1;FMR1;HRAS
regulation of cyclin-dependent protein kinase activity (GO:1904029)	1935-02-01	0.138317	0.344749	0	0	3.20085	6.33194	CDKN1B;CAMK2N1
positive regulation of NIK/NF-kappaB signaling (GO:1901224)	1935-02-01	0.138317	0.344749	0	0	3.20085	6.33194	RPS3;ACTN4
negative regulation of protein kinase B signaling (GO:0051898)	1935-02-01	0.138317	0.344749	0	0	3.20085	6.33194	PLEKHA1;INPP5K
negative regulation of epithelial cell migration (GO:0010633)	1935-02-01	0.138317	0.344749	0	0	3.20085	6.33194	DAB2IP;CORO1C
regulation of sodium ion transport (GO:0002028)	1935-02-01	0.138317	0.344749	0	0	3.20085	6.33194	AHCYL1;YWHAH
regulation of synapse assembly (GO:0051963)	1935-02-01	0.138317	0.344749	0	0	3.20085	6.33194	NLGN1;VPS35
neural crest cell development (GO:0014032)	1935-02-01	0.138317	0.344749	0	0	3.20085	6.33194	ERBB4;CORO1C
protein kinase B signaling (GO:0043491)	1935-02-01	0.138317	0.344749	0	0	3.20085	6.33194	CDKN1B;SIRT2
regulation of vascular associated smooth muscle cell migration (GO:1904752)	2021-01-08	0.139838	0.344749	0	0	7.53456	14.8225	TPM1
neuron projection extension involved in neuron projection guidance (GO:1902284)	2021-01-08	0.139838	0.344749	0	0	7.53456	14.8225	ALCAM
neurotransmitter receptor diffusion trapping (GO:0099628)	2021-01-08	0.139838	0.344749	0	0	7.53456	14.8225	GPHN
positive regulation of isotype switching (GO:0045830)	2021-01-08	0.139838	0.344749	0	0	7.53456	14.8225	TFRC
regulation of amyloid precursor protein catabolic process (GO:1902991)	2021-01-08	0.139838	0.344749	0	0	7.53456	14.8225	PRNP
response to epinephrine (GO:0071871)	2021-01-08	0.139838	0.344749	0	0	7.53456	14.8225	SIRT2
myelin maintenance (GO:0043217)	2021-01-08	0.139838	0.344749	0	0	7.53456	14.8225	EPB41L3
cellular response to forskolin (GO:1904322)	2021-01-08	0.139838	0.344749	0	0	7.53456	14.8225	GNAI1
cellular response to angiotensin (GO:1904385)	2021-01-08	0.139838	0.344749	0	0	7.53456	14.8225	AHCYL1
aorta development (GO:0035904)	44204	0.139838	0.344749	0	0	7.53456	14.8225	LRP1
negative regulation of toll-like receptor 4 signaling pathway (GO:0034144)	2021-01-08	0.139838	0.344749	0	0	7.53456	14.8225	DAB2IP
negative regulation of lipase activity (GO:0060192)	2021-01-08	0.139838	0.344749	0	0	7.53456	14.8225	SORT1
positive regulation of behavior (GO:0048520)	2021-01-08	0.139838	0.344749	0	0	7.53456	14.8225	NLGN1
negative regulation of potassium ion transmembrane transporter activity (GO:1901017)	2021-01-08	0.139838	0.344749	0	0	7.53456	14.8225	NEDD4L
positive regulation of DNA recombination (GO:0045911)	2021-01-08	0.139838	0.344749	0	0	7.53456	14.8225	TFRC
negative regulation of execution phase of apoptosis (GO:1900118)	44204	0.139838	0.344749	0	0	7.53456	14.8225	PAK2
regulation of endodeoxyribonuclease activity (GO:0032071)	2021-01-08	0.139838	0.344749	0	0	7.53456	14.8225	RPS3
phagolysosome assembly (GO:0001845)	2021-01-08	0.139838	0.344749	0	0	7.53456	14.8225	RAB7A
axon extension involved in axon guidance (GO:0048846)	2021-01-08	0.139838	0.344749	0	0	7.53456	14.8225	ALCAM
response to forskolin (GO:1904321)	2021-01-08	0.139838	0.344749	0	0	7.53456	14.8225	GNAI1
glycerolipid biosynthetic process (GO:0045017)	2021-01-08	0.139838	0.344749	0	0	7.53456	14.8225	CPNE1
plasma membrane to endosome transport (GO:0048227)	2021-01-08	0.139838	0.344749	0	0	7.53456	14.8225	SORT1
central nervous system myelination (GO:0022010)	2021-01-08	0.139838	0.344749	0	0	7.53456	14.8225	CNTNAP1
negative regulation of retrograde protein transport, ER to cytosol (GO:1904153)	2021-01-08	0.139838	0.344749	0	0	7.53456	14.8225	UBE2J1
positive regulation of IRE1-mediated unfolded protein response (GO:1903896)	2021-01-08	0.139838	0.344749	0	0	7.53456	14.8225	DAB2IP
dimeric G-protein coupled receptor signaling pathway (GO:0038042)	2021-01-08	0.139838	0.344749	0	0	7.53456	14.8225	GRM1
positive regulation of protein localization to cell surface (GO:2000010)	2021-01-08	0.139838	0.344749	0	0	7.53456	14.8225	HSP90AB1
response to hydroxyurea (GO:0072710)	2021-01-08	0.139838	0.344749	0	0	7.53456	14.8225	FMR1
cellular response to epinephrine stimulus (GO:0071872)	2021-01-08	0.139838	0.344749	0	0	7.53456	14.8225	SIRT2
histone H4 deacetylation (GO:0070933)	2021-01-08	0.139838	0.344749	0	0	7.53456	14.8225	SIRT2
negative regulation of establishment of protein localization (GO:1904950)	44204	0.139838	0.344749	0	0	7.53456	14.8225	SNX3
amyloid precursor protein catabolic process (GO:0042987)	2021-01-08	0.139838	0.344749	0	0	7.53456	14.8225	NCSTN
positive regulation of immunoglobulin mediated immune response (GO:0002891)	2021-01-08	0.139838	0.344749	0	0	7.53456	14.8225	TFRC
inositol phosphate catabolic process (GO:0071545)	44204	0.139838	0.344749	0	0	7.53456	14.8225	INPP5K
regulation of lipid transport (GO:0032368)	44204	0.139838	0.344749	0	0	7.53456	14.8225	LRP1
negative regulation of exocytosis (GO:0045920)	2021-01-08	0.139838	0.344749	0	0	7.53456	14.8225	RAB7A
pyrimidine nucleobase metabolic process (GO:0006206)	44204	0.139838	0.344749	0	0	7.53456	14.8225	UCKL1
negative regulation of neuron projection regeneration (GO:0070571)	44204	0.139838	0.344749	0	0	7.53456	14.8225	THY1
peptidyl-diphthamide metabolic process (GO:0017182)	2021-01-08	0.139838	0.344749	0	0	7.53456	14.8225	EEF2
negative regulation of cilium assembly (GO:1902018)	2021-01-08	0.139838	0.344749	0	0	7.53456	14.8225	MAP4
regulation of ERAD pathway (GO:1904292)	2021-01-08	0.139838	0.344749	0	0	7.53456	14.8225	BAG6
positive regulation of production of miRNAs involved in gene silencing by miRNA (GO:1903800)	2021-01-08	0.139838	0.344749	0	0	7.53456	14.8225	DDX5
positive regulation of chromatin silencing (GO:0031937)	2021-01-08	0.139838	0.344749	0	0	7.53456	14.8225	TRIM28
peptidyl-diphthamide biosynthetic process from peptidyl-histidine (GO:0017183)	2021-01-08	0.139838	0.344749	0	0	7.53456	14.8225	EEF2
peptidyl-lysine acetylation (GO:0018394)	2021-01-08	0.139838	0.344749	0	0	7.53456	14.8225	BAG6
mammary gland epithelial cell differentiation (GO:0060644)	2021-01-08	0.139838	0.344749	0	0	7.53456	14.8225	ERBB4
regulation of dopamine receptor signaling pathway (GO:0060159)	2021-01-08	0.139838	0.344749	0	0	7.53456	14.8225	VPS35
negative regulation of single stranded viral RNA replication via double stranded DNA intermediate (GO:0045869)	2021-01-08	0.139838	0.344749	0	0	7.53456	14.8225	INPP5K
peptidyl-lysine monomethylation (GO:0018026)	2021-01-08	0.139838	0.344749	0	0	7.53456	14.8225	SETD7
aldehyde biosynthetic process (GO:0046184)	2021-01-08	0.139838	0.344749	0	0	7.53456	14.8225	PDXK
postsynaptic neurotransmitter receptor diffusion trapping (GO:0098970)	2021-01-08	0.139838	0.344749	0	0	7.53456	14.8225	GPHN
pantothenate metabolic process (GO:0015939)	2021-01-08	0.139838	0.344749	0	0	7.53456	14.8225	PDZD11
cellular monovalent inorganic anion homeostasis (GO:0030320)	44204	0.139838	0.344749	0	0	7.53456	14.8225	SLC12A5
vascular endothelial growth factor receptor signaling pathway (GO:0048010)	1970-03-01	0.14234	0.349682	0	0	2.36708	4.61472	HSP90AA1;DAB2IP;PAK2
positive regulation of proteasomal ubiquitin-dependent protein catabolic process (GO:0032436)	1970-03-01	0.14234	0.349682	0	0	2.36708	4.61472	CSNK1A1;SIRT2;RBX1
Rab protein signal transduction (GO:0032482)	1970-03-01	0.14234	0.349682	0	0	2.36708	4.61472	RAB18;RAB7A;RAB11B
protein complex assembly (GO:0006461)	6/189	0.142874	0.350583	0	0	1.73708	3.38	GRIA1;KHDRBS1;TRIM28;OPA1;CSNK1A1;PFKM
regulation of potassium ion transport (GO:0043266)	1936-02-01	0.144737	0.35105	0	0	3.10655	6.00445	DPP6;KCNIP4
actin polymerization or depolymerization (GO:0008154)	1936-02-01	0.144737	0.35105	0	0	3.10655	6.00445	MICAL3;DSTN
muscle cell differentiation (GO:0042692)	1936-02-01	0.144737	0.35105	0	0	3.10655	6.00445	DDX17;DDX5
natural killer cell activation (GO:0030101)	1936-02-01	0.144737	0.35105	0	0	3.10655	6.00445	BAG6;SNX27
regulation of filopodium assembly (GO:0051489)	1936-02-01	0.144737	0.35105	0	0	3.10655	6.00445	NLGN1;FMR1
organophosphate biosynthetic process (GO:0090407)	1936-02-01	0.144737	0.35105	0	0	3.10655	6.00445	PDXK;GPHN
histone deacetylation (GO:0016575)	1936-02-01	0.144737	0.35105	0	0	3.10655	6.00445	PHB;SIRT2
regulation of blood circulation (GO:1903522)	1936-02-01	0.144737	0.35105	0	0	3.10655	6.00445	CELF2;TPM1
inner mitochondrial membrane organization (GO:0007007)	1936-02-01	0.144737	0.35105	0	0	3.10655	6.00445	CHCHD3;OPA1
regulation of cysteine-type endopeptidase activity (GO:2000116)	1936-02-01	0.144737	0.35105	0	0	3.10655	6.00445	GPRIN1;GRIN2B
protein homooligomerization (GO:0051260)	6/190	0.145383	0.352209	0	0	1.72755	3.33138	PRNP;MPP2;NLGN1;SIGMAR1;ATL2;ANXA6
regulation of signal transduction (GO:0009966)	7/233	0.146582	0.354162	0	0	1.64185	3.15262	SNX3;NTRK2;HOMER1;ITGA3;ERBB4;LMTK2;NUCKS1
regulation of Wnt signaling pathway (GO:0030111)	4/109	0.146674	0.354162	0	0	2.01543	3.86872	SNX3;LRP1;ITGA3;PPP1CA
response to insulin (GO:0032868)	1971-03-01	0.146695	0.354162	0	0	2.33215	4.47633	SORT1;INPP5K;SORBS1
cellular response to peptide hormone stimulus (GO:0071375)	4/110	0.150127	0.35549	0	0	1.99632	3.78557	PRKAR1B;PRKAR1A;INPP5K;SORBS1
protein peptidyl-prolyl isomerization (GO:0000413)	1937-02-01	0.151218	0.35549	0	0	3.01764	5.70041	FKBP8;PIN1
regulation of sodium ion transmembrane transporter activity (GO:2000649)	1937-02-01	0.151218	0.35549	0	0	3.01764	5.70041	NEDD4L;YWHAH
regulation of peptidyl-threonine phosphorylation (GO:0010799)	1937-02-01	0.151218	0.35549	0	0	3.01764	5.70041	INPP5K;SIRT2
nucleotide-excision repair, DNA incision, 5'-to lesion (GO:0006296)	1937-02-01	0.151218	0.35549	0	0	3.01764	5.70041	DDB1;RBX1
regulation of protein binding (GO:0043393)	4/111	0.15361	0.35549	0	0	1.97756	3.70463	LRP1;DAB2IP;PIN1;PPP1CA
nucleic acid phosphodiester bond hydrolysis (GO:0090305)	26724	0.155534	0.35549	0	0	2.26529	4.21546	DDB1;DDX1;RBX1
negative regulation of interleukin-17 production (GO:0032700)	44205	0.155887	0.35549	0	0	6.59241	12.2528	PRNP
negative regulation of NIK/NF-kappaB signaling (GO:1901223)	44205	0.155887	0.35549	0	0	6.59241	12.2528	CPNE1
RNA destabilization (GO:0050779)	2021-01-09	0.155887	0.35549	0	0	6.59241	12.2528	YTHDF3
dynamin family protein polymerization involved in membrane fission (GO:0003373)	2021-01-09	0.155887	0.35549	0	0	6.59241	12.2528	OPA1
negative regulation of phagocytosis (GO:0050765)	2021-01-09	0.155887	0.35549	0	0	6.59241	12.2528	SNX3
acidic amino acid transport (GO:0015800)	44205	0.155887	0.35549	0	0	6.59241	12.2528	SLC25A12
lactation (GO:0007595)	2021-01-09	0.155887	0.35549	0	0	6.59241	12.2528	ERBB4
epithelial cell apoptotic process (GO:1904019)	2021-01-09	0.155887	0.35549	0	0	6.59241	12.2528	DAB2IP
neuronal ion channel clustering (GO:0045161)	2021-01-09	0.155887	0.35549	0	0	6.59241	12.2528	CNTN2
microtubule anchoring at centrosome (GO:0034454)	2021-01-09	0.155887	0.35549	0	0	6.59241	12.2528	HOOK3
postsynaptic membrane assembly (GO:0097104)	2021-01-09	0.155887	0.35549	0	0	6.59241	12.2528	NLGN1
regulation of SNARE complex assembly (GO:0035542)	44205	0.155887	0.35549	0	0	6.59241	12.2528	VPS41
regulation of muscle system process (GO:0090257)	2021-01-09	0.155887	0.35549	0	0	6.59241	12.2528	TPM1
negative regulation of catenin import into nucleus (GO:0035414)	2021-01-09	0.155887	0.35549	0	0	6.59241	12.2528	DAB2IP
regulation of microtubule-based movement (GO:0060632)	2021-01-09	0.155887	0.35549	0	0	6.59241	12.2528	NEFH
positive regulation of synapse maturation (GO:0090129)	2021-01-09	0.155887	0.35549	0	0	6.59241	12.2528	DAB2IP
mitochondrial respiratory chain complex III assembly (GO:0034551)	2021-01-09	0.155887	0.35549	0	0	6.59241	12.2528	TTC19
positive regulation of nitric-oxide synthase biosynthetic process (GO:0051770)	2021-01-09	0.155887	0.35549	0	0	6.59241	12.2528	NAMPT
ionotropic glutamate receptor signaling pathway (GO:0035235)	2021-01-09	0.155887	0.35549	0	0	6.59241	12.2528	GPRIN1
neurotrophin TRK receptor signaling pathway (GO:0048011)	2021-01-09	0.155887	0.35549	0	0	6.59241	12.2528	SORT1
nuclear migration (GO:0007097)	2021-01-09	0.155887	0.35549	0	0	6.59241	12.2528	HOOK3
regulation of platelet-derived growth factor receptor-beta signaling pathway (GO:2000586)	2021-01-09	0.155887	0.35549	0	0	6.59241	12.2528	LRP1
negative regulation of gluconeogenesis (GO:0045721)	2021-01-09	0.155887	0.35549	0	0	6.59241	12.2528	PGP
negative regulation of protein exit from endoplasmic reticulum (GO:0070862)	2021-01-09	0.155887	0.35549	0	0	6.59241	12.2528	UBE2J1
heterochromatin organization (GO:0070828)	2021-01-09	0.155887	0.35549	0	0	6.59241	12.2528	SETD7
virion attachment to host cell (GO:0019062)	2021-01-09	0.155887	0.35549	0	0	6.59241	12.2528	HSP90AB1
negative regulation of phosphatidylinositol 3-kinase signaling (GO:0014067)	2021-01-09	0.155887	0.35549	0	0	6.59241	12.2528	DAB2IP
respiratory chain complex III assembly (GO:0017062)	2021-01-09	0.155887	0.35549	0	0	6.59241	12.2528	TTC19
cellular response to oxygen levels (GO:0071453)	2021-01-09	0.155887	0.35549	0	0	6.59241	12.2528	ATP6V1G1
positive regulation of autophagosome assembly (GO:2000786)	2021-01-09	0.155887	0.35549	0	0	6.59241	12.2528	RAB3GAP1
regulation of striated muscle tissue development (GO:0016202)	2021-01-09	0.155887	0.35549	0	0	6.59241	12.2528	SIRT2
peptidyl-arginine methylation (GO:0018216)	44205	0.155887	0.35549	0	0	6.59241	12.2528	PRMT5
regulation of methylation-dependent chromatin silencing (GO:0090308)	2021-01-09	0.155887	0.35549	0	0	6.59241	12.2528	TRIM28
negative regulation of vascular endothelial growth factor receptor signaling pathway (GO:0030948)	2021-01-09	0.155887	0.35549	0	0	6.59241	12.2528	DAB2IP
regulation of leukocyte activation (GO:0002694)	2021-01-09	0.155887	0.35549	0	0	6.59241	12.2528	MYO18A
glucose import (GO:0046323)	44205	0.155887	0.35549	0	0	6.59241	12.2528	SORT1
dynamin family protein polymerization involved in mitochondrial fission (GO:0003374)	2021-01-09	0.155887	0.35549	0	0	6.59241	12.2528	OPA1
negative regulation of amyloid-beta formation (GO:1902430)	2021-01-09	0.155887	0.35549	0	0	6.59241	12.2528	PRNP
negative regulation of transcription by competitive promoter binding (GO:0010944)	2021-01-09	0.155887	0.35549	0	0	6.59241	12.2528	PHB
negative regulation of potassium ion transmembrane transport (GO:1901380)	2021-01-09	0.155887	0.35549	0	0	6.59241	12.2528	NEDD4L
negative regulation of microtubule polymerization (GO:0031115)	2021-01-09	0.155887	0.35549	0	0	6.59241	12.2528	TUBB4A
mesodermal cell differentiation (GO:0048333)	2021-01-09	0.155887	0.35549	0	0	6.59241	12.2528	ITGA3
antigen processing and presentation of exogenous peptide antigen via MHC class I, TAP-independent (GO:0002480)	2021-01-09	0.155887	0.35549	0	0	6.59241	12.2528	LNPEP
neuron projection organization (GO:0106027)	2021-01-09	0.155887	0.35549	0	0	6.59241	12.2528	PRNP
potassium ion import (GO:0010107)	1938-02-01	0.157755	0.358193	0	0	2.93366	5.41763	KCNJ6;SLC12A5
muscle filament sliding (GO:0030049)	13912	0.157755	0.358193	0	0	2.93366	5.41763	TPM3;TPM1
actin-myosin filament sliding (GO:0033275)	13912	0.157755	0.358193	0	0	2.93366	5.41763	TPM3;TPM1
homotypic cell-cell adhesion (GO:0034109)	13912	0.157755	0.358193	0	0	2.93366	5.41763	RAP2B;GNAS
regulation of organelle organization (GO:0033043)	4/113	0.160669	0.363627	0	0	1.94108	3.54909	RABGAP1L;RABGAP1;VPS35;SQSTM1
positive regulation of kinase activity (GO:0033674)	4/113	0.160669	0.363627	0	0	1.94108	3.54909	NTRK2;ERBB4;EEF1A2;LMTK2
positive regulation of developmental process (GO:0051094)	4/113	0.160669	0.363627	0	0	1.94108	3.54909	HSP90AB1;TFRC;VPS35;CORO1C
signal transduction by p53 class mediator (GO:0072331)	1939-02-01	0.164344	0.363731	0	0	2.85423	5.15415	DDX5;USP10
regulation of proteasomal protein catabolic process (GO:0061136)	1939-02-01	0.164344	0.363731	0	0	2.85423	5.15415	FMR1;DAB2IP
clathrin-dependent endocytosis (GO:0072583)	1939-02-01	0.164344	0.363731	0	0	2.85423	5.15415	NLGN1;CANX
organelle assembly (GO:0070925)	10/376	0.166902	0.363731	0	0	1.44974	2.59555	ATXN2L;ACTR3;STX12;DDX6;AHI1;ATXN2;RILPL1;CIRBP;RPS3;RAB7A
positive regulation of JNK cascade (GO:0046330)	1976-03-01	0.169091	0.363731	0	0	2.17186	3.86009	RPS3;DAB2IP;HRAS
positive regulation of apoptotic signaling pathway (GO:2001235)	27820	0.169091	0.363731	0	0	2.17186	3.86009	RPS3;DAB2IP;PAK2
nucleotide-excision repair, DNA incision (GO:0033683)	1940-02-01	0.170981	0.363731	0	0	2.77898	4.90824	DDB1;RBX1
negative regulation of epidermal growth factor receptor signaling pathway (GO:0042059)	1940-02-01	0.170981	0.363731	0	0	2.77898	4.90824	DAB2IP;RAB7A
regulation of protein dephosphorylation (GO:0035304)	1940-02-01	0.170981	0.363731	0	0	2.77898	4.90824	PIN1;ARPP19
sensory organ development (GO:0007423)	1940-02-01	0.170981	0.363731	0	0	2.77898	4.90824	AHI1;RAB18
ameboidal-type cell migration (GO:0001667)	1940-02-01	0.170981	0.363731	0	0	2.77898	4.90824	ERBB4;CORO1C
tRNA aminoacylation (GO:0043039)	1940-02-01	0.170981	0.363731	0	0	2.77898	4.90824	AIMP2;PPA2
peptidyl-proline modification (GO:0018208)	1940-02-01	0.170981	0.363731	0	0	2.77898	4.90824	FKBP8;PIN1
androgen receptor signaling pathway (GO:0030521)	1940-02-01	0.170981	0.363731	0	0	2.77898	4.90824	DDX17;DDX5
response to peptide hormone (GO:0043434)	1940-02-01	0.170981	0.363731	0	0	2.77898	4.90824	SORT1;GNAI1
neuron migration (GO:0001764)	14642	0.170981	0.363731	0	0	2.77898	4.90824	NTRK2;ELP3
regulation of intracellular transport (GO:0032386)	1940-02-01	0.170981	0.363731	0	0	2.77898	4.90824	NEFH;RAB11B
positive regulation of peptidyl-tyrosine phosphorylation (GO:0050731)	4/116	0.171472	0.363731	0	0	1.88879	3.33057	PRNP;DLG3;ERBB4;PAK2
regulation of synapse maturation (GO:0090128)	2021-01-10	0.171637	0.363731	0	0	5.85962	10.3268	DAB2IP
peptidyl-serine dephosphorylation (GO:0070262)	2021-01-10	0.171637	0.363731	0	0	5.85962	10.3268	PPP1CA
negative regulation of cellular protein catabolic process (GO:1903363)	2021-01-10	0.171637	0.363731	0	0	5.85962	10.3268	DAB2IP
negative regulation of sodium ion transmembrane transport (GO:1902306)	2021-01-10	0.171637	0.363731	0	0	5.85962	10.3268	NEDD4L
amino sugar metabolic process (GO:0006040)	2021-01-10	0.171637	0.363731	0	0	5.85962	10.3268	GFPT1
3'-UTR-mediated mRNA destabilization (GO:0061158)	2021-01-10	0.171637	0.363731	0	0	5.85962	10.3268	KHSRP
chloride ion homeostasis (GO:0055064)	2021-01-10	0.171637	0.363731	0	0	5.85962	10.3268	SLC12A5
regulation of attachment of spindle microtubules to kinetochore (GO:0051988)	2021-01-10	0.171637	0.363731	0	0	5.85962	10.3268	SIRT2
regulation of cytoplasmic translational elongation (GO:1900247)	2021-01-10	0.171637	0.363731	0	0	5.85962	10.3268	EEF2
presynaptic membrane assembly (GO:0097105)	2021-01-10	0.171637	0.363731	0	0	5.85962	10.3268	NLGN1
establishment of spindle localization (GO:0051293)	2021-01-10	0.171637	0.363731	0	0	5.85962	10.3268	MAP4
regulation of platelet-derived growth factor receptor signaling pathway (GO:0010640)	2021-01-10	0.171637	0.363731	0	0	5.85962	10.3268	CNTN1
contractile actin filament bundle assembly (GO:0030038)	2021-01-10	0.171637	0.363731	0	0	5.85962	10.3268	SORBS1
I-kappaB phosphorylation (GO:0007252)	2021-01-10	0.171637	0.363731	0	0	5.85962	10.3268	DAB2IP
L-glutamate transport (GO:0015813)	2021-01-10	0.171637	0.363731	0	0	5.85962	10.3268	SLC25A12
regulation of single stranded viral RNA replication via double stranded DNA intermediate (GO:0045091)	2021-01-10	0.171637	0.363731	0	0	5.85962	10.3268	INPP5K
cellular copper ion homeostasis (GO:0006878)	2021-01-10	0.171637	0.363731	0	0	5.85962	10.3268	PRNP
regulation of amyloid-beta clearance (GO:1900221)	2021-01-10	0.171637	0.363731	0	0	5.85962	10.3268	LRP1
epithelial cell morphogenesis (GO:0003382)	44206	0.171637	0.363731	0	0	5.85962	10.3268	RILPL1
peptidyl-lysine dimethylation (GO:0018027)	2021-01-10	0.171637	0.363731	0	0	5.85962	10.3268	SETD7
negative regulation of gene silencing by miRNA (GO:0060965)	2021-01-10	0.171637	0.363731	0	0	5.85962	10.3268	ELAVL1
regulation of urine volume (GO:0035809)	2021-01-10	0.171637	0.363731	0	0	5.85962	10.3268	INPP5K
glycoprotein catabolic process (GO:0006516)	2021-01-10	0.171637	0.363731	0	0	5.85962	10.3268	FBXO2
primary miRNA processing (GO:0031053)	2021-01-10	0.171637	0.363731	0	0	5.85962	10.3268	HNRNPA2B1
regulation of histone phosphorylation (GO:0033127)	44206	0.171637	0.363731	0	0	5.85962	10.3268	FMR1
Rap protein signal transduction (GO:0032486)	44206	0.171637	0.363731	0	0	5.85962	10.3268	RAP2B
endosomal vesicle fusion (GO:0034058)	44206	0.171637	0.363731	0	0	5.85962	10.3268	VPS41
regulation of cytoplasmic translation (GO:2000765)	44206	0.171637	0.363731	0	0	5.85962	10.3268	FMR1
mitochondrial respiratory chain complex III biogenesis (GO:0097033)	44206	0.171637	0.363731	0	0	5.85962	10.3268	TTC19
positive regulation of circadian rhythm (GO:0042753)	44206	0.171637	0.363731	0	0	5.85962	10.3268	NLGN1
positive regulation of T cell receptor signaling pathway (GO:0050862)	2021-01-10	0.171637	0.363731	0	0	5.85962	10.3268	RPS3
negative regulation of protein maturation (GO:1903318)	2021-01-10	0.171637	0.363731	0	0	5.85962	10.3268	PRNP
maintenance of apical/basal cell polarity (GO:0035090)	2021-01-10	0.171637	0.363731	0	0	5.85962	10.3268	PDZD11
actin filament-based transport (GO:0099515)	44206	0.171637	0.363731	0	0	5.85962	10.3268	ACTN4
negative regulation of transcription from RNA polymerase II promoter in response to stress (GO:0097201)	2021-01-10	0.171637	0.363731	0	0	5.85962	10.3268	SIRT2
regulation of phospholipase activity (GO:0010517)	2021-01-10	0.171637	0.363731	0	0	5.85962	10.3268	LRP1
negative regulation of sodium ion transmembrane transporter activity (GO:2000650)	44206	0.171637	0.363731	0	0	5.85962	10.3268	NEDD4L
glucocorticoid metabolic process (GO:0008211)	2021-01-10	0.171637	0.363731	0	0	5.85962	10.3268	YWHAH
stress fiber assembly (GO:0043149)	2021-01-10	0.171637	0.363731	0	0	5.85962	10.3268	SORBS1
regulation of mRNA 3'-end processing (GO:0031440)	2021-01-10	0.171637	0.363731	0	0	5.85962	10.3268	AHCYL1
positive regulation of lipid localization (GO:1905954)	2021-01-10	0.171637	0.363731	0	0	5.85962	10.3268	LRP1
positive regulation of vacuole organization (GO:0044090)	2021-01-10	0.171637	0.363731	0	0	5.85962	10.3268	RAB3GAP1
positive regulation of mRNA splicing, via spliceosome (GO:0048026)	2021-01-10	0.171637	0.363731	0	0	5.85962	10.3268	CELF4
maintenance of epithelial cell apical/basal polarity (GO:0045199)	2021-01-10	0.171637	0.363731	0	0	5.85962	10.3268	PDZD11
negative regulation of glucose transport (GO:0010829)	44206	0.171637	0.363731	0	0	5.85962	10.3268	INPP5K
axon guidance (GO:0007411)	5/158	0.173508	0.367325	0	0	1.72936	3.02903	ALCAM;TUBB3;TNR;HRAS;SHANK3
regulation of calcium-mediated signaling (GO:0050848)	1941-02-01	0.177661	0.373106	0	0	2.70758	4.67837	ITPR1;CDH13
peptide transport (GO:0015833)	1941-02-01	0.177661	0.373106	0	0	2.70758	4.67837	LMAN2L;RAB7A
calcium-dependent cell-cell adhesion via plasma membrane cell adhesion molecules (GO:0016339)	1941-02-01	0.177661	0.373106	0	0	2.70758	4.67837	NLGN1;CDH13
positive regulation of cell division (GO:0051781)	1941-02-01	0.177661	0.373106	0	0	2.70758	4.67837	SIRT2;CIT
negative regulation of cell projection organization (GO:0031345)	1941-02-01	0.177661	0.373106	0	0	2.70758	4.67837	PRNP;GRIN2B
regulation of substrate adhesion-dependent cell spreading (GO:1900024)	1941-02-01	0.177661	0.373106	0	0	2.70758	4.67837	ACTN4;CORO1C
cellular response to peptide (GO:1901653)	15008	0.177661	0.373106	0	0	2.70758	4.67837	PRNP;LRP1
regulation of cellular metabolic process (GO:0031323)	1941-02-01	0.177661	0.373106	0	0	2.70758	4.67837	VPS35;CACYBP
negative regulation of cell communication (GO:0010648)	1978-03-01	0.178313	0.37389	0	0	2.11373	3.64453	NTRK2;ERBB4;LMTK2
proteolysis (GO:0006508)	8/291	0.178391	0.37389	0	0	1.49816	2.58249	PSMA6;NCSTN;PSMB5;PSMC4;FBXO2;CPNE1;CNTN1;LNPEP
regulation of MAPK cascade (GO:0043408)	6/203	0.17975	0.374187	0	0	1.61247	2.7673	NTRK2;ERBB4;DAB2IP;LMTK2;HRAS;PAK2
RNA export from nucleus (GO:0006405)	4/119	0.182521	0.374187	0	0	1.83924	3.12834	SRSF1;HNRNPA2B1;SRSF2;SRSF3
cell-cell junction assembly (GO:0007043)	1979-03-01	0.182975	0.374187	0	0	2.08581	3.54256	CNTNAP1;EPB41L3;CDH13
regulation of transforming growth factor beta receptor signaling pathway (GO:0017015)	1979-03-01	0.182975	0.374187	0	0	2.08581	3.54256	HSP90AB1;ITGA3;PIN1
positive regulation of protein localization to nucleus (GO:1900182)	1942-02-01	0.184381	0.374187	0	0	2.63976	4.46317	CCT7;CCT4
regulation of stem cell population maintenance (GO:2000036)	2021-01-11	0.187093	0.374187	0	0	5.27339	8.83898	ELAVL1
interleukin-27-mediated signaling pathway (GO:0070106)	2021-01-11	0.187093	0.374187	0	0	5.27339	8.83898	CANX
microtubule anchoring at microtubule organizing center (GO:0072393)	2021-01-11	0.187093	0.374187	0	0	5.27339	8.83898	HOOK3
postsynapse assembly (GO:0099068)	44207	0.187093	0.374187	0	0	5.27339	8.83898	NLGN1
regulation of lipid kinase activity (GO:0043550)	2021-01-11	0.187093	0.374187	0	0	5.27339	8.83898	EEF1A2
intracellular protein transmembrane transport (GO:0065002)	2021-01-11	0.187093	0.374187	0	0	5.27339	8.83898	SEC61B
positive regulation by host of viral process (GO:0044794)	2021-01-11	0.187093	0.374187	0	0	5.27339	8.83898	NUCKS1
regulation of lamellipodium morphogenesis (GO:2000392)	2021-01-11	0.187093	0.374187	0	0	5.27339	8.83898	CORO1C
immune response-regulating cell surface receptor signaling pathway (GO:0002768)	2021-01-11	0.187093	0.374187	0	0	5.27339	8.83898	BAG6
UV-damage excision repair (GO:0070914)	44207	0.187093	0.374187	0	0	5.27339	8.83898	DDB1
regulation of vascular endothelial growth factor signaling pathway (GO:1900746)	2021-01-11	0.187093	0.374187	0	0	5.27339	8.83898	DAB2IP
proteasome assembly (GO:0043248)	2021-01-11	0.187093	0.374187	0	0	5.27339	8.83898	PSMD11
positive regulation of receptor biosynthetic process (GO:0010870)	44207	0.187093	0.374187	0	0	5.27339	8.83898	HNRNPK
regulation of long-term neuronal synaptic plasticity (GO:0048169)	44207	0.187093	0.374187	0	0	5.27339	8.83898	SHANK3
chromatin silencing at rDNA (GO:0000183)	44207	0.187093	0.374187	0	0	5.27339	8.83898	SIRT2
biotin metabolic process (GO:0006768)	44207	0.187093	0.374187	0	0	5.27339	8.83898	PDZD11
purine nucleobase metabolic process (GO:0006144)	2021-01-11	0.187093	0.374187	0	0	5.27339	8.83898	PRPS1
internal protein amino acid acetylation (GO:0006475)	2021-01-11	0.187093	0.374187	0	0	5.27339	8.83898	BAG6
negative regulation of amyloid precursor protein catabolic process (GO:1902992)	2021-01-11	0.187093	0.374187	0	0	5.27339	8.83898	PRNP
positive regulation of chromosome segregation (GO:0051984)	2021-01-11	0.187093	0.374187	0	0	5.27339	8.83898	SIRT2
renal filtration (GO:0097205)	2021-01-11	0.187093	0.374187	0	0	5.27339	8.83898	ITGA3
regulation of short-term neuronal synaptic plasticity (GO:0048172)	44207	0.187093	0.374187	0	0	5.27339	8.83898	RAB3GAP1
synaptonemal complex assembly (GO:0007130)	2021-01-11	0.187093	0.374187	0	0	5.27339	8.83898	BAG6
negative regulation of protein localization to cell surface (GO:2000009)	2021-01-11	0.187093	0.374187	0	0	5.27339	8.83898	NEDD4L
methionine metabolic process (GO:0006555)	44207	0.187093	0.374187	0	0	5.27339	8.83898	AHCYL1
positive regulation of heterotypic cell-cell adhesion (GO:0034116)	44207	0.187093	0.374187	0	0	5.27339	8.83898	THY1
negative regulation of potassium ion transport (GO:0043267)	44207	0.187093	0.374187	0	0	5.27339	8.83898	NEDD4L
establishment of synaptic vesicle localization (GO:0097480)	2021-01-11	0.187093	0.374187	0	0	5.27339	8.83898	TMEM230
cellular response to increased oxygen levels (GO:0036295)	44207	0.187093	0.374187	0	0	5.27339	8.83898	ATP6V1G1
glycerol metabolic process (GO:0006071)	44207	0.187093	0.374187	0	0	5.27339	8.83898	PGP
cyclooxygenase pathway (GO:0019371)	2021-01-11	0.187093	0.374187	0	0	5.27339	8.83898	PTGES2
positive regulation of sodium ion transmembrane transporter activity (GO:2000651)	2021-01-11	0.187093	0.374187	0	0	5.27339	8.83898	ACTN4
regulation of synaptic transmission, GABAergic (GO:0032228)	2021-01-11	0.187093	0.374187	0	0	5.27339	8.83898	NLGN1
positive regulation of glucose metabolic process (GO:0010907)	2021-01-11	0.187093	0.374187	0	0	5.27339	8.83898	ARPP19
protein O-linked mannosylation (GO:0035269)	2021-01-11	0.187093	0.374187	0	0	5.27339	8.83898	DPM1
aspartate family amino acid biosynthetic process (GO:0009067)	2021-01-11	0.187093	0.374187	0	0	5.27339	8.83898	ASNS
carbohydrate derivative catabolic process (GO:1901136)	2021-01-11	0.187093	0.374187	0	0	5.27339	8.83898	FBXO2
regulation of symbiosis, encompassing mutualism through parasitism (GO:0043903)	2021-01-11	0.187093	0.374187	0	0	5.27339	8.83898	EXOC7
interleukin-35-mediated signaling pathway (GO:0070757)	2021-01-11	0.187093	0.374187	0	0	5.27339	8.83898	CANX
urate metabolic process (GO:0046415)	2021-01-11	0.187093	0.374187	0	0	5.27339	8.83898	PRPS1
synaptonemal complex organization (GO:0070193)	2021-01-11	0.187093	0.374187	0	0	5.27339	8.83898	BAG6
UDP-N-acetylglucosamine biosynthetic process (GO:0006048)	2021-01-11	0.187093	0.374187	0	0	5.27339	8.83898	GFPT1
hepatocyte growth factor receptor signaling pathway (GO:0048012)	2021-01-11	0.187093	0.374187	0	0	5.27339	8.83898	SIRT2
ERBB signaling pathway (GO:0038127)	1980-03-01	0.187669	0.374623	0	0	2.05862	3.44423	HSP90AA1;ERBB4;HRAS
regulation of protein serine/threonine kinase activity (GO:0071900)	29281	0.187669	0.374623	0	0	2.05862	3.44423	CDKN1B;DAB2IP;THY1
regulation of cell differentiation (GO:0045595)	4/121	0.190015	0.378664	0	0	1.80761	3.00182	DDX17;DDX5;HSP90AB1;OCIAD1
negative regulation of ERBB signaling pathway (GO:1901185)	1943-02-01	0.191137	0.378664	0	0	2.57524	4.26142	ERBB4;DAB2IP
eye development (GO:0001654)	15738	0.191137	0.378664	0	0	2.57524	4.26142	RAB18;RAB3GAP1
RNA catabolic process (GO:0006401)	15738	0.191137	0.378664	0	0	2.57524	4.26142	HNRNPD;SND1
intrinsic apoptotic signaling pathway by p53 class mediator (GO:0072332)	15738	0.191137	0.378664	0	0	2.57524	4.26142	BAG6;DDX5
response to unfolded protein (GO:0006986)	1943-02-01	0.191137	0.378664	0	0	2.57524	4.26142	HSP90AA1;HSP90AB1
response to hydrogen peroxide (GO:0042542)	1943-02-01	0.191137	0.378664	0	0	2.57524	4.26142	PLEKHA1;RPS3
nucleobase-containing compound catabolic process (GO:0034655)	1943-02-01	0.191137	0.378664	0	0	2.57524	4.26142	HNRNPD;SND1
positive regulation of phosphorylation (GO:0042327)	6/208	0.193769	0.383212	0	0	1.57215	2.58004	NTRK2;ERBB4;FMR1;LMTK2;PIN1;HRAS
sulfur compound biosynthetic process (GO:0044272)	4/122	0.193798	0.383212	0	0	1.7922	2.94089	GCLC;VCAN;GSS;HAGH
DNA damage response, signal transduction by p53 class mediator (GO:0030330)	30011	0.197148	0.383677	0	0	2.00629	3.25782	CDKN1B;USP10;RPL26
positive regulation of cell cycle (GO:0045787)	30011	0.197148	0.383677	0	0	2.00629	3.25782	CDKN1B;HSP90AB1;ASNS
positive regulation of cell cycle arrest (GO:0071158)	1982-03-01	0.197148	0.383677	0	0	2.00629	3.25782	CDKN1B;DAB2IP;RPL26
regulation of focal adhesion assembly (GO:0051893)	1944-02-01	0.197925	0.383677	0	0	2.5138	4.07202	THY1;CORO1C
positive regulation of macroautophagy (GO:0016239)	16103	0.197925	0.383677	0	0	2.5138	4.07202	RAB3GAP1;PAFAH1B2
negative regulation of type I interferon production (GO:0032480)	1944-02-01	0.197925	0.383677	0	0	2.5138	4.07202	TRAF3;PIN1
positive regulation of viral process (GO:0048524)	16103	0.197925	0.383677	0	0	2.5138	4.07202	DDB1;RAB7A
platelet degranulation (GO:0002576)	4/124	0.201433	0.383677	0	0	1.76215	2.82349	TMX3;HABP4;ACTN4;VTI1B
negative regulation of macromolecule metabolic process (GO:0010605)	4/124	0.201433	0.383677	0	0	1.76215	2.82349	ATXN2;CPNE1;TARDBP;HRAS
negative regulation of signaling (GO:0023057)	1983-03-01	0.201931	0.383677	0	0	1.98111	3.16944	NTRK2;ERBB4;LMTK2
establishment of protein localization to membrane (GO:0090150)	30376	0.201931	0.383677	0	0	1.98111	3.16944	RILPL1;RAB3GAP1;RAB11B
positive regulation of homeostatic process (GO:0032846)	1983-03-01	0.201931	0.383677	0	0	1.98111	3.16944	GPRIN1;DHX36;INPP5K
mitochondrion organization (GO:0007005)	5/167	0.202209	0.383677	0	0	1.63253	2.60953	TIMM10B;CHCHD3;OPA1;PHB;TIMM50
regulation of retrograde protein transport, ER to cytosol (GO:1904152)	44208	0.202262	0.383677	0	0	4.79374	7.66131	UBE2J1
regulation of nitric-oxide synthase biosynthetic process (GO:0051769)	2021-01-12	0.202262	0.383677	0	0	4.79374	7.66131	NAMPT
signal transduction involved in G2 DNA damage checkpoint (GO:0072425)	2021-01-12	0.202262	0.383677	0	0	4.79374	7.66131	BRCC3
peptidyl-arginine modification (GO:0018195)	2021-01-12	0.202262	0.383677	0	0	4.79374	7.66131	PRMT5
regulation of IRE1-mediated unfolded protein response (GO:1903894)	2021-01-12	0.202262	0.383677	0	0	4.79374	7.66131	DAB2IP
negative regulation of ERAD pathway (GO:1904293)	2021-01-12	0.202262	0.383677	0	0	4.79374	7.66131	UBE2J1
iron ion transport (GO:0006826)	2021-01-12	0.202262	0.383677	0	0	4.79374	7.66131	TFRC
pyrimidine nucleoside salvage (GO:0043097)	2021-01-12	0.202262	0.383677	0	0	4.79374	7.66131	UCKL1
regulation of intrinsic apoptotic signaling pathway in response to DNA damage by p53 class mediator (GO:1902165)	2021-01-12	0.202262	0.383677	0	0	4.79374	7.66131	RPL26
amino sugar biosynthetic process (GO:0046349)	2021-01-12	0.202262	0.383677	0	0	4.79374	7.66131	GFPT1
viral RNA genome replication (GO:0039694)	44208	0.202262	0.383677	0	0	4.79374	7.66131	EEA1
UDP-N-acetylglucosamine metabolic process (GO:0006047)	2021-01-12	0.202262	0.383677	0	0	4.79374	7.66131	GFPT1
Golgi localization (GO:0051645)	2021-01-12	0.202262	0.383677	0	0	4.79374	7.66131	HOOK3
oligodendrocyte development (GO:0014003)	2021-01-12	0.202262	0.383677	0	0	4.79374	7.66131	CNTNAP1
histone arginine methylation (GO:0034969)	2021-01-12	0.202262	0.383677	0	0	4.79374	7.66131	PRMT5
eye photoreceptor cell development (GO:0042462)	2021-01-12	0.202262	0.383677	0	0	4.79374	7.66131	THY1
histone H3 deacetylation (GO:0070932)	2021-01-12	0.202262	0.383677	0	0	4.79374	7.66131	SIRT2
regulation of protein localization to cell periphery (GO:1904375)	44208	0.202262	0.383677	0	0	4.79374	7.66131	VTI1B
cargo loading into COPII-coated vesicle (GO:0090110)	2021-01-12	0.202262	0.383677	0	0	4.79374	7.66131	SAR1A
response to interleukin-6 (GO:0070741)	2021-01-12	0.202262	0.383677	0	0	4.79374	7.66131	PHB
regulation of sequestering of triglyceride (GO:0010889)	2021-01-12	0.202262	0.383677	0	0	4.79374	7.66131	OSBPL8
positive regulation of endoplasmic reticulum unfolded protein response (GO:1900103)	2021-01-12	0.202262	0.383677	0	0	4.79374	7.66131	DAB2IP
aromatic compound biosynthetic process (GO:0019438)	2021-01-12	0.202262	0.383677	0	0	4.79374	7.66131	PDXK
regulation of blood vessel size (GO:0050880)	2021-01-12	0.202262	0.383677	0	0	4.79374	7.66131	GCLC
establishment of protein localization to mitochondrial membrane (GO:0090151)	2021-01-12	0.202262	0.383677	0	0	4.79374	7.66131	HSP90AA1
pyrimidine-containing compound salvage (GO:0008655)	2021-01-12	0.202262	0.383677	0	0	4.79374	7.66131	UCKL1
endosome transport via multivesicular body sorting pathway (GO:0032509)	2021-01-12	0.202262	0.383677	0	0	4.79374	7.66131	SORT1
positive regulation of mRNA metabolic process (GO:1903313)	2021-01-12	0.202262	0.383677	0	0	4.79374	7.66131	KHSRP
dermatan sulfate biosynthetic process (GO:0030208)	2021-01-12	0.202262	0.383677	0	0	4.79374	7.66131	VCAN
negative regulation of androgen receptor signaling pathway (GO:0060766)	2021-01-12	0.202262	0.383677	0	0	4.79374	7.66131	PHB
positive regulation of neuron migration (GO:2001224)	44208	0.202262	0.383677	0	0	4.79374	7.66131	DAB2IP
regulation of catabolic process (GO:0009894)	2021-01-12	0.202262	0.383677	0	0	4.79374	7.66131	NEDD4L
protein polymerization (GO:0051258)	16469	0.204742	0.387679	0	0	2.45521	3.89398	ZNF207;HDGFL3
metal ion homeostasis (GO:0055065)	1945-02-01	0.204742	0.387679	0	0	2.45521	3.89398	SLC12A5;GPRIN1
G-protein coupled receptor signaling pathway, coupled to cyclic nucleotide second messenger (GO:0007187)	4/125	0.205285	0.388356	0	0	1.7475	2.76691	GNAQ;GNA11;GNAS;GNAI1
regulation of mitotic nuclear division (GO:0007088)	1984-03-01	0.206741	0.390408	0	0	1.95656	3.0841	PRMT5;PIN1;SIRT2
regulation of cell cycle G2/M phase transition (GO:1902749)	1984-03-01	0.206741	0.390408	0	0	1.95656	3.0841	HSP90AA1;TUBB4B;TUBB4A
negative regulation of nucleic acid-templated transcription (GO:1903507)	11/444	0.209098	0.394099	0	0	1.34698	2.10796	EIF4A2;KHDRBS1;USP47;ILF3;GCLC;CDKN1B;TRIM28;DAB2IP;INPP5K;PHB;SIRT2
mitochondrial ATP synthesis coupled electron transport (GO:0042775)	1985-03-01	0.211577	0.394099	0	0	1.9326	3.00164	NDUFA8;NDUFB10;CYC1
regulation of peptidyl-tyrosine phosphorylation (GO:0050730)	1985-03-01	0.211577	0.394099	0	0	1.9326	3.00164	PRNP;RAP2B;PAK2
regulation of type I interferon production (GO:0032479)	1985-03-01	0.211577	0.394099	0	0	1.9326	3.00164	TRAF3;DHX36;PIN1
protein complex disassembly (GO:0043241)	16834	0.211584	0.394099	0	0	2.39929	3.72641	CSNK1A1;PPP1CA
tRNA aminoacylation for protein translation (GO:0006418)	1946-02-01	0.211584	0.394099	0	0	2.39929	3.72641	AIMP2;PPA2
pyruvate metabolic process (GO:0006090)	1946-02-01	0.211584	0.394099	0	0	2.39929	3.72641	HAGH;PFKM
regulation of cellular component movement (GO:0051270)	16834	0.211584	0.394099	0	0	2.39929	3.72641	ERBB4;ACTN4
mitochondrial electron transport, NADH to ubiquinone (GO:0006120)	16834	0.211584	0.394099	0	0	2.39929	3.72641	NDUFA8;NDUFB10
negative regulation of autophagy (GO:0010507)	1946-02-01	0.211584	0.394099	0	0	2.39929	3.72641	WDR6;SIRT2
regulation of DNA metabolic process (GO:0051052)	1946-02-01	0.211584	0.394099	0	0	2.39929	3.72641	HNRNPD;NUCKS1
positive regulation of protein kinase B signaling (GO:0051897)	4/127	0.213051	0.394099	0	0	1.71891	2.65782	OSBPL8;ERBB4;CPNE1;CNTN1
regulation of cell cycle (GO:0051726)	6/215	0.214061	0.394099	0	0	1.51895	2.34146	CDKN1B;CAMK2N1;MADD;TARDBP;PAK2;SIRT2
positive regulation of apoptotic process (GO:0043065)	8/307	0.216281	0.394099	0	0	1.41681	2.16939	PRNP;NCSTN;ARHGEF9;RPS3;DAB2IP;KALRN;SQSTM1;SIRT2
dermatan sulfate metabolic process (GO:0030205)	2021-01-13	0.217149	0.394099	0	0	4.39404	6.71045	VCAN
signal transduction involved in DNA damage checkpoint (GO:0072422)	2021-01-13	0.217149	0.394099	0	0	4.39404	6.71045	BRCC3
nucleotide-sugar metabolic process (GO:0009225)	2021-01-13	0.217149	0.394099	0	0	4.39404	6.71045	GFPT1
mitochondrial genome maintenance (GO:0000002)	2021-01-13	0.217149	0.394099	0	0	4.39404	6.71045	OPA1
positive regulation of sodium ion transport (GO:0010765)	2021-01-13	0.217149	0.394099	0	0	4.39404	6.71045	AHCYL1
positive regulation of cardiac muscle cell proliferation (GO:0060045)	2021-01-13	0.217149	0.394099	0	0	4.39404	6.71045	ERBB4
regulation of NMDA receptor activity (GO:2000310)	2021-01-13	0.217149	0.394099	0	0	4.39404	6.71045	NLGN1
Notch receptor processing, ligand-dependent (GO:0035333)	2021-01-13	0.217149	0.394099	0	0	4.39404	6.71045	NCSTN
steroid catabolic process (GO:0006706)	2021-01-13	0.217149	0.394099	0	0	4.39404	6.71045	YWHAH
synaptic vesicle cycle (GO:0099504)	2021-01-13	0.217149	0.394099	0	0	4.39404	6.71045	NLGN1
positive regulation of glycogen biosynthetic process (GO:0045725)	2021-01-13	0.217149	0.394099	0	0	4.39404	6.71045	SORBS1
multivesicular body sorting pathway (GO:0071985)	2021-01-13	0.217149	0.394099	0	0	4.39404	6.71045	SORT1
regulation of production of miRNAs involved in gene silencing by miRNA (GO:1903798)	2021-01-13	0.217149	0.394099	0	0	4.39404	6.71045	DDX5
positive regulation of cholesterol efflux (GO:0010875)	2021-01-13	0.217149	0.394099	0	0	4.39404	6.71045	LRP1
negative regulation of voltage-gated calcium channel activity (GO:1901386)	2021-01-13	0.217149	0.394099	0	0	4.39404	6.71045	FMR1
alpha-linolenic acid metabolic process (GO:0036109)	2021-01-13	0.217149	0.394099	0	0	4.39404	6.71045	ACSL1
copper ion homeostasis (GO:0055070)	44209	0.217149	0.394099	0	0	4.39404	6.71045	PRNP
negative regulation of viral release from host cell (GO:1902187)	44209	0.217149	0.394099	0	0	4.39404	6.71045	TRIM28
regulation of execution phase of apoptosis (GO:1900117)	2021-01-13	0.217149	0.394099	0	0	4.39404	6.71045	SIRT2
ER-associated misfolded protein catabolic process (GO:0071712)	44209	0.217149	0.394099	0	0	4.39404	6.71045	BAG6
negative regulation of reactive oxygen species biosynthetic process (GO:1903427)	2021-01-13	0.217149	0.394099	0	0	4.39404	6.71045	KHSRP
protein neddylation (GO:0045116)	2021-01-13	0.217149	0.394099	0	0	4.39404	6.71045	RBX1
cellular response to low-density lipoprotein particle stimulus (GO:0071404)	2021-01-13	0.217149	0.394099	0	0	4.39404	6.71045	CDH13
negative regulation of hormone secretion (GO:0046888)	2021-01-13	0.217149	0.394099	0	0	4.39404	6.71045	RAB11FIP5
regulation of neurotransmitter transport (GO:0051588)	2021-01-13	0.217149	0.394099	0	0	4.39404	6.71045	FMR1
positive regulation of ERAD pathway (GO:1904294)	2021-01-13	0.217149	0.394099	0	0	4.39404	6.71045	BAG6
mammary gland epithelium development (GO:0061180)	2021-01-13	0.217149	0.394099	0	0	4.39404	6.71045	ERBB4
diacylglycerol metabolic process (GO:0046339)	2021-01-13	0.217149	0.394099	0	0	4.39404	6.71045	DGKZ
chondroitin sulfate catabolic process (GO:0030207)	2021-01-13	0.217149	0.394099	0	0	4.39404	6.71045	VCAN
amyloid precursor protein metabolic process (GO:0042982)	2021-01-13	0.217149	0.394099	0	0	4.39404	6.71045	NCSTN
tRNA splicing, via endonucleolytic cleavage and ligation (GO:0006388)	2021-01-13	0.217149	0.394099	0	0	4.39404	6.71045	DDX1
negative regulation of cellular biosynthetic process (GO:0031327)	1947-02-01	0.218449	0.395773	0	0	2.34585	3.56852	KHSRP;PGP
regulation of organelle assembly (GO:1902115)	1947-02-01	0.218449	0.395773	0	0	2.34585	3.56852	ATXN2L;ATXN2
positive regulation of protein kinase activity (GO:0045860)	5/172	0.218804	0.396074	0	0	1.58325	2.40587	PRNP;DLG3;VAPB;DAB2IP;PAK2
regulation of macromolecule metabolic process (GO:0060255)	4/129	0.220898	0.39952	0	0	1.69123	2.55385	EIF4A2;EIF4A1;LRP1;SORT1
positive regulation of cellular component biogenesis (GO:0044089)	1987-03-01	0.221321	0.399597	0	0	1.88639	2.84494	NLGN1;RPS3;RAB7A
regulation of MAP kinase activity (GO:0043405)	1987-03-01	0.221321	0.399597	0	0	1.88639	2.84494	DAB2IP;INPP5K;HRAS
protein glycosylation (GO:0006486)	4/130	0.22485	0.404517	0	0	1.67772	2.5037	DPM1;GFPT1;ALG2;SIRT2
regulation of cell cycle arrest (GO:0071156)	1948-02-01	0.225332	0.404517	0	0	2.29474	3.41958	HSP90AB1;DAB2IP
regulation of epithelial cell migration (GO:0010632)	1948-02-01	0.225332	0.404517	0	0	2.29474	3.41958	DAB2IP;CORO1C
regulation of mitochondrion organization (GO:0010821)	1948-02-01	0.225332	0.404517	0	0	2.29474	3.41958	VPS35;SQSTM1
positive regulation of chemotaxis (GO:0050921)	1948-02-01	0.225332	0.404517	0	0	2.29474	3.41958	CNTN1;CDH13
peptide biosynthetic process (GO:0043043)	5/174	0.225557	0.404517	0	0	1.56435	2.3296	EEF1A1;EEF1A2;RPS3;RPS3A;RPL26
positive regulation of protein complex assembly (GO:0031334)	1988-03-01	0.226227	0.404517	0	0	1.8641	2.77046	DDB1;RPS3;RBX1
regulation of neuron apoptotic process (GO:0043523)	32568	0.231153	0.404517	0	0	1.84233	2.69842	NTRK2;PRNP;SIGMAR1
neuron cell-cell adhesion (GO:0007158)	44210	0.231759	0.404517	0	0	4.05583	5.92986	NLGN1
regulation of fibroblast migration (GO:0010762)	44210	0.231759	0.404517	0	0	4.05583	5.92986	CORO1C
nucleoside salvage (GO:0043174)	44210	0.231759	0.404517	0	0	4.05583	5.92986	UCKL1
mitotic cell cycle arrest (GO:0071850)	44210	0.231759	0.404517	0	0	4.05583	5.92986	CDKN1B
intermediate filament organization (GO:0045109)	44210	0.231759	0.404517	0	0	4.05583	5.92986	NEFL
negative regulation of receptor-mediated endocytosis (GO:0048261)	2021-01-14	0.231759	0.404517	0	0	4.05583	5.92986	ATXN2
regulation of nucleocytoplasmic transport (GO:0046822)	2021-01-14	0.231759	0.404517	0	0	4.05583	5.92986	KHDRBS1
regulation of phosphate metabolic process (GO:0019220)	2021-01-14	0.231759	0.404517	0	0	4.05583	5.92986	SIRT2
regulation of extracellular matrix disassembly (GO:0010715)	2021-01-14	0.231759	0.404517	0	0	4.05583	5.92986	LRP1
mitochondrial electron transport, ubiquinol to cytochrome c (GO:0006122)	2021-01-14	0.231759	0.404517	0	0	4.05583	5.92986	CYC1
regulation of calcineurin-NFAT signaling cascade (GO:0070884)	2021-01-14	0.231759	0.404517	0	0	4.05583	5.92986	PRNP
negative regulation of focal adhesion assembly (GO:0051895)	2021-01-14	0.231759	0.404517	0	0	4.05583	5.92986	CORO1C
oligodendrocyte differentiation (GO:0048709)	44210	0.231759	0.404517	0	0	4.05583	5.92986	PTPRZ1
positive regulation of mitochondrial fission (GO:0090141)	2021-01-14	0.231759	0.404517	0	0	4.05583	5.92986	VPS35
regulation of defense response to virus (GO:0050688)	2021-01-14	0.231759	0.404517	0	0	4.05583	5.92986	TRAF3
regulation of neural precursor cell proliferation (GO:2000177)	2021-01-14	0.231759	0.404517	0	0	4.05583	5.92986	PTPRZ1
cellular protein complex disassembly (GO:0043624)	2021-01-14	0.231759	0.404517	0	0	4.05583	5.92986	ETF1
positive regulation of glycogen metabolic process (GO:0070875)	2021-01-14	0.231759	0.404517	0	0	4.05583	5.92986	SORBS1
neuromuscular process controlling balance (GO:0050885)	2021-01-14	0.231759	0.404517	0	0	4.05583	5.92986	SHANK1
amyloid-beta metabolic process (GO:0050435)	2021-01-14	0.231759	0.404517	0	0	4.05583	5.92986	NCSTN
Golgi to vacuole transport (GO:0006896)	2021-01-14	0.231759	0.404517	0	0	4.05583	5.92986	VTI1B
negative regulation of endoplasmic reticulum stress-induced intrinsic apoptotic signaling pathway (GO:1902236)	2021-01-14	0.231759	0.404517	0	0	4.05583	5.92986	OPA1
oligosaccharide-lipid intermediate biosynthetic process (GO:0006490)	2021-01-14	0.231759	0.404517	0	0	4.05583	5.92986	ALG2
cellular response to nitrogen compound (GO:1901699)	2021-01-14	0.231759	0.404517	0	0	4.05583	5.92986	FMR1
RNA splicing, via endonucleolytic cleavage and ligation (GO:0000394)	2021-01-14	0.231759	0.404517	0	0	4.05583	5.92986	DDX1
purine nucleotide catabolic process (GO:0006195)	2021-01-14	0.231759	0.404517	0	0	4.05583	5.92986	ITPA
nucleoside triphosphate metabolic process (GO:0009141)	2021-01-14	0.231759	0.404517	0	0	4.05583	5.92986	ITPA
positive regulation of heart rate (GO:0010460)	2021-01-14	0.231759	0.404517	0	0	4.05583	5.92986	TPM1
positive regulation of calcium ion-dependent exocytosis (GO:0045956)	44210	0.231759	0.404517	0	0	4.05583	5.92986	NLGN1
regulation of response to interferon-gamma (GO:0060330)	2021-01-14	0.231759	0.404517	0	0	4.05583	5.92986	HSP90AB1
negative regulation of cation transmembrane transport (GO:1904063)	2021-01-14	0.231759	0.404517	0	0	4.05583	5.92986	NEDD4L
purine-containing compound catabolic process (GO:0072523)	44210	0.231759	0.404517	0	0	4.05583	5.92986	ITPA
protein heterooligomerization (GO:0051291)	1949-02-01	0.23223	0.405004	0	0	2.2458	3.27892	GPRIN1;GRIN2B
cellular response to cytokine stimulus (GO:0071345)	11/456	0.233604	0.407061	0	0	1.30984	1.90467	SYNCRIP;HSP90AA1;PTPRZ1;USP10;KHSRP;RPS3;DAB2IP;CNTN1;INPP5K;PHB;PTPN5
protein targeting (GO:0006605)	4/133	0.236812	0.412309	0	0	1.63845	2.36017	TIMM10B;NLGN1;VPS41;VTI1B
positive regulation of JUN kinase activity (GO:0043507)	18295	0.239142	0.415331	0	0	2.1989	3.14596	RPS3;DAB2IP
negative regulation of viral genome replication (GO:0045071)	1950-02-01	0.239142	0.415331	0	0	2.1989	3.14596	ILF3;INPP5K
receptor internalization (GO:0031623)	1950-02-01	0.239142	0.415331	0	0	2.1989	3.14596	TFRC;LRP1
phagocytosis (GO:0006909)	4/135	0.24487	0.415374	0	0	1.61327	2.26992	TMX3;LRP1;CSNK1A1;CORO1C
nuclear export (GO:0051168)	1992-03-01	0.246045	0.415374	0	0	1.77996	2.49593	SRSF1;SRSF2;SRSF3
negative regulation of neuron projection development (GO:0010977)	1951-02-01	0.246064	0.415374	0	0	2.15391	3.02014	OMG;THY1
regulation of telomere maintenance via telomerase (GO:0032210)	18660	0.246064	0.415374	0	0	2.15391	3.02014	CCT7;CCT4
myotube differentiation (GO:0014902)	2021-01-15	0.246096	0.415374	0	0	3.76594	5.27996	SORT1
NAD biosynthesis via nicotinamide riboside salvage pathway (GO:0034356)	2021-01-15	0.246096	0.415374	0	0	3.76594	5.27996	NAMPT
maintenance of protein location in nucleus (GO:0051457)	44211	0.246096	0.415374	0	0	3.76594	5.27996	SKP1
positive regulation of response to wounding (GO:1903036)	2021-01-15	0.246096	0.415374	0	0	3.76594	5.27996	HRAS
negative regulation of adherens junction organization (GO:1903392)	2021-01-15	0.246096	0.415374	0	0	3.76594	5.27996	CORO1C
negative regulation of platelet-derived growth factor receptor signaling pathway (GO:0010642)	2021-01-15	0.246096	0.415374	0	0	3.76594	5.27996	LRP1
pyrimidine nucleoside biosynthetic process (GO:0046134)	44211	0.246096	0.415374	0	0	3.76594	5.27996	UCKL1
L-alpha-amino acid transmembrane transport (GO:1902475)	2021-01-15	0.246096	0.415374	0	0	3.76594	5.27996	SLC25A12
ventricular cardiac muscle cell action potential (GO:0086005)	2021-01-15	0.246096	0.415374	0	0	3.76594	5.27996	NEDD4L
presynapse assembly (GO:0099054)	2021-01-15	0.246096	0.415374	0	0	3.76594	5.27996	NLGN1
dermatan sulfate proteoglycan biosynthetic process (GO:0050651)	2021-01-15	0.246096	0.415374	0	0	3.76594	5.27996	VCAN
negative regulation of interleukin-2 production (GO:0032703)	2021-01-15	0.246096	0.415374	0	0	3.76594	5.27996	PRNP
regulation of cell-substrate junction assembly (GO:0090109)	2021-01-15	0.246096	0.415374	0	0	3.76594	5.27996	CORO1C
negative regulation of release of cytochrome c from mitochondria (GO:0090201)	2021-01-15	0.246096	0.415374	0	0	3.76594	5.27996	OPA1
pyrimidine-containing compound metabolic process (GO:0072527)	2021-01-15	0.246096	0.415374	0	0	3.76594	5.27996	UCKL1
positive regulation of phosphoprotein phosphatase activity (GO:0032516)	2021-01-15	0.246096	0.415374	0	0	3.76594	5.27996	HSP90AB1
cellular response to virus (GO:0098586)	2021-01-15	0.246096	0.415374	0	0	3.76594	5.27996	FMR1
negative regulation of cellular component movement (GO:0051271)	2021-01-15	0.246096	0.415374	0	0	3.76594	5.27996	PIN1
regulation of exit from mitosis (GO:0007096)	2021-01-15	0.246096	0.415374	0	0	3.76594	5.27996	SIRT2
positive regulation of viral release from host cell (GO:1902188)	2021-01-15	0.246096	0.415374	0	0	3.76594	5.27996	DDB1
negative regulation of viral entry into host cell (GO:0046597)	2021-01-15	0.246096	0.415374	0	0	3.76594	5.27996	SNX3
body fluid secretion (GO:0007589)	2021-01-15	0.246096	0.415374	0	0	3.76594	5.27996	ERBB4
negative regulation of RNA metabolic process (GO:0051253)	2021-01-15	0.246096	0.415374	0	0	3.76594	5.27996	PTBP2
monovalent inorganic anion homeostasis (GO:0055083)	2021-01-15	0.246096	0.415374	0	0	3.76594	5.27996	SLC12A5
positive regulation of exosomal secretion (GO:1903543)	2021-01-15	0.246096	0.415374	0	0	3.76594	5.27996	RAB7A
regulation of protein complex disassembly (GO:0043244)	2021-01-15	0.246096	0.415374	0	0	3.76594	5.27996	ETF1
negative regulation of protein processing (GO:0010955)	2021-01-15	0.246096	0.415374	0	0	3.76594	5.27996	PRNP
regulation of RNA export from nucleus (GO:0046831)	2021-01-15	0.246096	0.415374	0	0	3.76594	5.27996	KHDRBS1
regulation of peptide secretion (GO:0002791)	2021-01-15	0.246096	0.415374	0	0	3.76594	5.27996	STXBP5
cellular sodium ion homeostasis (GO:0006883)	2021-01-15	0.246096	0.415374	0	0	3.76594	5.27996	NEDD4L
establishment of protein localization to endoplasmic reticulum (GO:0072599)	2021-01-15	0.246096	0.415374	0	0	3.76594	5.27996	RAB3GAP1
cotranslational protein targeting to membrane (GO:0006613)	34029	0.251043	0.423382	0	0	1.76009	2.43268	RPS3;RPS3A;RPL26
positive regulation of nervous system development (GO:0051962)	1952-02-01	0.252992	0.425985	0	0	2.11073	2.90098	NLGN1;DAB2IP
positive regulation of secretion by cell (GO:1903532)	1952-02-01	0.252992	0.425985	0	0	2.11073	2.90098	MYO18A;STXBP5
axon development (GO:0061564)	1994-03-01	0.256055	0.427767	0	0	1.74066	2.37141	MAP1A;OMG;NEFH
positive regulation of protein import into nucleus (GO:0042307)	1953-02-01	0.259925	0.427767	0	0	2.06924	2.78801	TRIM28;ERBB4
protein localization to microtubule organizing center (GO:1905508)	44212	0.260167	0.427767	0	0	3.5147	4.73229	HOOK3
peptidyl-threonine dephosphorylation (GO:0035970)	2021-01-16	0.260167	0.427767	0	0	3.5147	4.73229	PPP1CA
negative regulation of NF-kappaB import into nucleus (GO:0042347)	2021-01-16	0.260167	0.427767	0	0	3.5147	4.73229	G3BP2
Notch receptor processing (GO:0007220)	2021-01-16	0.260167	0.427767	0	0	3.5147	4.73229	NCSTN
positive regulation of cardiac muscle tissue growth (GO:0055023)	2021-01-16	0.260167	0.427767	0	0	3.5147	4.73229	ERBB4
regulation of membrane depolarization (GO:0003254)	2021-01-16	0.260167	0.427767	0	0	3.5147	4.73229	NEDD4L
regulation of toll-like receptor 4 signaling pathway (GO:0034143)	2021-01-16	0.260167	0.427767	0	0	3.5147	4.73229	DAB2IP
negative regulation of response to wounding (GO:1903035)	2021-01-16	0.260167	0.427767	0	0	3.5147	4.73229	CASK
regulation of cell cycle phase transition (GO:1901987)	44212	0.260167	0.427767	0	0	3.5147	4.73229	DDB1
cytoplasmic sequestering of transcription factor (GO:0042994)	44212	0.260167	0.427767	0	0	3.5147	4.73229	G3BP2
regulation of reactive oxygen species biosynthetic process (GO:1903426)	2021-01-16	0.260167	0.427767	0	0	3.5147	4.73229	GPRIN1
regulation of exosomal secretion (GO:1903541)	44212	0.260167	0.427767	0	0	3.5147	4.73229	RAB7A
epithelial cell development (GO:0002064)	44212	0.260167	0.427767	0	0	3.5147	4.73229	RILPL1
neuromuscular process (GO:0050905)	44212	0.260167	0.427767	0	0	3.5147	4.73229	SHANK1
protein deacylation (GO:0035601)	2021-01-16	0.260167	0.427767	0	0	3.5147	4.73229	SIRT2
positive regulation of mRNA processing (GO:0050685)	44212	0.260167	0.427767	0	0	3.5147	4.73229	CELF4
guanosine-containing compound metabolic process (GO:1901068)	2021-01-16	0.260167	0.427767	0	0	3.5147	4.73229	OPA1
positive regulation of antigen receptor-mediated signaling pathway (GO:0050857)	2021-01-16	0.260167	0.427767	0	0	3.5147	4.73229	RPS3
neuron apoptotic process (GO:0051402)	2021-01-16	0.260167	0.427767	0	0	3.5147	4.73229	CIT
peptidyl-lysine methylation (GO:0018022)	2021-01-16	0.260167	0.427767	0	0	3.5147	4.73229	SETD7
aorta morphogenesis (GO:0035909)	44212	0.260167	0.427767	0	0	3.5147	4.73229	LRP1
regulation of membrane repolarization (GO:0060306)	44212	0.260167	0.427767	0	0	3.5147	4.73229	NEDD4L
endoplasmic reticulum to cytosol transport (GO:1903513)	2021-01-16	0.260167	0.427767	0	0	3.5147	4.73229	SEC61B
linoleic acid metabolic process (GO:0043651)	2021-01-16	0.260167	0.427767	0	0	3.5147	4.73229	ACSL1
regulation of glucose transport (GO:0010827)	2021-01-16	0.260167	0.427767	0	0	3.5147	4.73229	INPP5K
positive regulation of response to endoplasmic reticulum stress (GO:1905898)	2021-01-16	0.260167	0.427767	0	0	3.5147	4.73229	BAG6
negative regulation of lipid storage (GO:0010888)	2021-01-16	0.260167	0.427767	0	0	3.5147	4.73229	OSBPL8
regulation of intrinsic apoptotic signaling pathway in response to DNA damage (GO:1902229)	2021-01-16	0.260167	0.427767	0	0	3.5147	4.73229	RPS3
protein phosphorylation (GO:0006468)	11/470	0.263505	0.432916	0	0	1.26896	1.69239	NTRK2;ILF3;PRKAR1B;CSNK1A1;ERBB4;DAB2IP;ELP1;DCLK2;LMTK2;CDC42BPA;PAK2
regulation of small GTPase mediated signal transduction (GO:0051056)	4/140	0.265268	0.435456	0	0	1.55356	2.0616	ARHGAP32;ARHGEF9;SQSTM1;KALRN
activation of protein kinase activity (GO:0032147)	6/233	0.269208	0.435456	0	0	1.39721	1.83352	OSBPL8;PRKAR1B;PRKAR1A;MADD;DAB2IP;PAK2
protein targeting to ER (GO:0045047)	1997-03-01	0.271171	0.435456	0	0	1.68485	2.19873	RPS3;RPS3A;RPL26
antigen processing and presentation of exogenous peptide antigen via MHC class II (GO:0019886)	1997-03-01	0.271171	0.435456	0	0	1.68485	2.19873	CAPZA1;CANX;RAB7A
response to tumor necrosis factor (GO:0034612)	1997-03-01	0.271171	0.435456	0	0	1.68485	2.19873	RPS3;DAB2IP;INPP5K
negative regulation of cell motility (GO:2000146)	1997-03-01	0.271171	0.435456	0	0	1.68485	2.19873	TPM1;PIN1;THY1
antigen processing and presentation of exogenous peptide antigen (GO:0002478)	1997-03-01	0.271171	0.435456	0	0	1.68485	2.19873	CAPZA1;CANX;RAB7A
mitochondrial respiratory chain complex assembly (GO:0033108)	1997-03-01	0.271171	0.435456	0	0	1.68485	2.19873	NDUFA8;NDUFB10;TTC19
cell-cell adhesion via plasma-membrane adhesion molecules (GO:0098742)	4/142	0.273515	0.435456	0	0	1.53089	1.98465	NLGN1;ALCAM;CDH13;CD200
regulation of cellular catabolic process (GO:0031329)	1955-02-01	0.273795	0.435456	0	0	1.99095	2.57903	USP10;ITPR1
positive regulation of cysteine-type endopeptidase activity (GO:2001056)	1955-02-01	0.273795	0.435456	0	0	1.99095	2.57903	GPRIN1;GRIN2B
negative regulation of cellular response to growth factor stimulus (GO:0090288)	1955-02-01	0.273795	0.435456	0	0	1.99095	2.57903	DAB2IP;CASK
positive regulation of protein processing (GO:0010954)	2021-01-17	0.273976	0.435456	0	0	3.29486	4.2659	PHB
positive regulation of cholesterol transport (GO:0032376)	2021-01-17	0.273976	0.435456	0	0	3.29486	4.2659	LRP1
positive regulation of focal adhesion assembly (GO:0051894)	2021-01-17	0.273976	0.435456	0	0	3.29486	4.2659	THY1
regulation of telomere maintenance via telomere lengthening (GO:1904356)	2021-01-17	0.273976	0.435456	0	0	3.29486	4.2659	HNRNPA2B1
mRNA cis splicing, via spliceosome (GO:0045292)	2021-01-17	0.273976	0.435456	0	0	3.29486	4.2659	SRSF1
positive regulation of dendrite extension (GO:1903861)	2021-01-17	0.273976	0.435456	0	0	3.29486	4.2659	NEDD4L
protein mannosylation (GO:0035268)	2021-01-17	0.273976	0.435456	0	0	3.29486	4.2659	DPM1
pigment granule transport (GO:0051904)	2021-01-17	0.273976	0.435456	0	0	3.29486	4.2659	RAB11B
negative regulation of cell development (GO:0010721)	2021-01-17	0.273976	0.435456	0	0	3.29486	4.2659	HOOK3
regulation of myelination (GO:0031641)	2021-01-17	0.273976	0.435456	0	0	3.29486	4.2659	SIRT2
negative regulation of reactive oxygen species metabolic process (GO:2000378)	2021-01-17	0.273976	0.435456	0	0	3.29486	4.2659	SIRT2
spindle assembly checkpoint (GO:0071173)	2021-01-17	0.273976	0.435456	0	0	3.29486	4.2659	ZNF207
negative regulation of stress fiber assembly (GO:0051497)	2021-01-17	0.273976	0.435456	0	0	3.29486	4.2659	INPP5K
negative regulation of cellular carbohydrate metabolic process (GO:0010677)	2021-01-17	0.273976	0.435456	0	0	3.29486	4.2659	PGP
regulation of protein localization to membrane (GO:1905475)	2021-01-17	0.273976	0.435456	0	0	3.29486	4.2659	VTI1B
embryo development ending in birth or egg hatching (GO:0009792)	2021-01-17	0.273976	0.435456	0	0	3.29486	4.2659	CELF4
positive regulation of signal transduction by p53 class mediator (GO:1901798)	2021-01-17	0.273976	0.435456	0	0	3.29486	4.2659	DDX5
heterocycle biosynthetic process (GO:0018130)	2021-01-17	0.273976	0.435456	0	0	3.29486	4.2659	GPHN
nucleotide catabolic process (GO:0009166)	2021-01-17	0.273976	0.435456	0	0	3.29486	4.2659	ITPA
neurotrophin signaling pathway (GO:0038179)	44213	0.273976	0.435456	0	0	3.29486	4.2659	SORT1
serine family amino acid metabolic process (GO:0009069)	44213	0.273976	0.435456	0	0	3.29486	4.2659	GCLC
positive regulation by host of viral transcription (GO:0043923)	2021-01-17	0.273976	0.435456	0	0	3.29486	4.2659	NUCKS1
synaptic vesicle transport (GO:0048489)	2021-01-17	0.273976	0.435456	0	0	3.29486	4.2659	TMEM230
purine-containing compound metabolic process (GO:0072521)	2021-01-17	0.273976	0.435456	0	0	3.29486	4.2659	PRPS1
positive regulation of telomere capping (GO:1904355)	2021-01-17	0.273976	0.435456	0	0	3.29486	4.2659	HNRNPD
melanosome transport (GO:0032402)	2021-01-17	0.273976	0.435456	0	0	3.29486	4.2659	RAB11B
regulation of early endosome to late endosome transport (GO:2000641)	2021-01-17	0.273976	0.435456	0	0	3.29486	4.2659	SNX3
cellular response to inorganic substance (GO:0071241)	2021-01-17	0.273976	0.435456	0	0	3.29486	4.2659	FMR1
mitotic spindle assembly checkpoint (GO:0007094)	2021-01-17	0.273976	0.435456	0	0	3.29486	4.2659	ZNF207
cellular monovalent inorganic cation homeostasis (GO:0030004)	2021-01-17	0.273976	0.435456	0	0	3.29486	4.2659	NEDD4L
mitotic spindle checkpoint (GO:0071174)	2021-01-17	0.273976	0.435456	0	0	3.29486	4.2659	ZNF207
receptor-mediated endocytosis (GO:0006898)	5/188	0.274373	0.435757	0	0	1.44363	1.867	HSP90AA1;TFRC;LRP1;CANX;M6PR
antigen processing and presentation of peptide antigen via MHC class II (GO:0002495)	1998-03-01	0.276233	0.438378	0	0	1.66703	2.14465	CAPZA1;CANX;RAB7A
negative regulation of signal transduction (GO:0009968)	7/283	0.277611	0.440232	0	0	1.34095	1.71847	PTPRE;NTRK2;LRP1;ERBB4;DAB2IP;INPP5K;LMTK2
chromosome organization (GO:0051276)	20486	0.280726	0.442121	0	0	1.95398	2.48229	DDB1;RBX1
regulation of secretion by cell (GO:1903530)	20486	0.280726	0.442121	0	0	1.95398	2.48229	FMR1;STXBP5
regulation of tumor necrosis factor-mediated signaling pathway (GO:0010803)	1956-02-01	0.280726	0.442121	0	0	1.95398	2.48229	MADD;CPNE1
positive regulation of protein transport (GO:0051222)	1956-02-01	0.280726	0.442121	0	0	1.95398	2.48229	CNST;MYO18A
phosphatidylinositol-mediated signaling (GO:0048015)	1956-02-01	0.280726	0.442121	0	0	1.95398	2.48229	PLEKHA1;SIRT2
autophagosome organization (GO:1905037)	1956-02-01	0.280726	0.442121	0	0	1.95398	2.48229	STX12;RAB7A
peptidyl-serine phosphorylation (GO:0018105)	4/145	0.285964	0.442121	0	0	1.49809	1.87544	CSNK1A1;LMTK2;DCLK2;PAK2
regulation of adherens junction organization (GO:1903391)	44214	0.287528	0.442121	0	0	3.10089	3.86505	CORO1C
long-chain fatty-acyl-CoA biosynthetic process (GO:0035338)	44214	0.287528	0.442121	0	0	3.10089	3.86505	ACSL1
establishment of melanosome localization (GO:0032401)	44214	0.287528	0.442121	0	0	3.10089	3.86505	RAB11B
membrane protein ectodomain proteolysis (GO:0006509)	44214	0.287528	0.442121	0	0	3.10089	3.86505	NCSTN
regulation of viral process (GO:0050792)	44214	0.287528	0.442121	0	0	3.10089	3.86505	RAB7A
regulation of amyloid-beta formation (GO:1902003)	44214	0.287528	0.442121	0	0	3.10089	3.86505	PRNP
protein localization to centrosome (GO:0071539)	2021-01-18	0.287528	0.442121	0	0	3.10089	3.86505	HOOK3
regulation of spindle organization (GO:0090224)	2021-01-18	0.287528	0.442121	0	0	3.10089	3.86505	GNAI1
regulation of cellular response to transforming growth factor beta stimulus (GO:1903844)	2021-01-18	0.287528	0.442121	0	0	3.10089	3.86505	ITGA3
regulation of keratinocyte proliferation (GO:0010837)	2021-01-18	0.287528	0.442121	0	0	3.10089	3.86505	CASK
release of cytochrome c from mitochondria (GO:0001836)	2021-01-18	0.287528	0.442121	0	0	3.10089	3.86505	TIMM50
calcium-mediated signaling using intracellular calcium source (GO:0035584)	2021-01-18	0.287528	0.442121	0	0	3.10089	3.86505	PRNP
maintenance of protein localization in organelle (GO:0072595)	2021-01-18	0.287528	0.442121	0	0	3.10089	3.86505	SKP1
negative regulation of fibroblast proliferation (GO:0048147)	2021-01-18	0.287528	0.442121	0	0	3.10089	3.86505	DAB2IP
establishment or maintenance of apical/basal cell polarity (GO:0035088)	2021-01-18	0.287528	0.442121	0	0	3.10089	3.86505	DLG3
negative regulation of RNA splicing (GO:0033119)	2021-01-18	0.287528	0.442121	0	0	3.10089	3.86505	PTBP2
regulation of dephosphorylation (GO:0035303)	2021-01-18	0.287528	0.442121	0	0	3.10089	3.86505	INPP5K
negative regulation of protein dephosphorylation (GO:0035308)	2021-01-18	0.287528	0.442121	0	0	3.10089	3.86505	ARPP19
prostaglandin biosynthetic process (GO:0001516)	2021-01-18	0.287528	0.442121	0	0	3.10089	3.86505	PTGES2
modulation by virus of host morphology or physiology (GO:0019048)	2021-01-18	0.287528	0.442121	0	0	3.10089	3.86505	VAPB
negative regulation of microtubule depolymerization (GO:0007026)	2021-01-18	0.287528	0.442121	0	0	3.10089	3.86505	HDGFL3
regulation of cardiac muscle cell proliferation (GO:0060043)	2021-01-18	0.287528	0.442121	0	0	3.10089	3.86505	ERBB4
retrograde protein transport, ER to cytosol (GO:0030970)	44214	0.287528	0.442121	0	0	3.10089	3.86505	SEC61B
regulation of cholesterol efflux (GO:0010874)	44214	0.287528	0.442121	0	0	3.10089	3.86505	LRP1
negative regulation of peptidyl-serine phosphorylation (GO:0033137)	2021-01-18	0.287528	0.442121	0	0	3.10089	3.86505	INPP5K
dolichol-linked oligosaccharide biosynthetic process (GO:0006488)	44214	0.287528	0.442121	0	0	3.10089	3.86505	ALG2
positive regulation of actin cytoskeleton reorganization (GO:2000251)	44214	0.287528	0.442121	0	0	3.10089	3.86505	HRAS
regulation of cAMP-mediated signaling (GO:0043949)	44214	0.287528	0.442121	0	0	3.10089	3.86505	GNAI1
negative regulation of protein transport (GO:0051224)	2021-01-18	0.287528	0.442121	0	0	3.10089	3.86505	SNX3
regulation of peptidase activity (GO:0052547)	2021-01-18	0.287528	0.442121	0	0	3.10089	3.86505	PSMA3
establishment of epithelial cell polarity (GO:0090162)	44214	0.287528	0.442121	0	0	3.10089	3.86505	MYO18A
regulation of dendrite extension (GO:1903859)	2021-01-18	0.287528	0.442121	0	0	3.10089	3.86505	NEDD4L
regulation of smooth muscle cell migration (GO:0014910)	2021-01-18	0.287528	0.442121	0	0	3.10089	3.86505	LRP1
positive regulation of morphogenesis of an epithelium (GO:1905332)	2021-01-18	0.287528	0.442121	0	0	3.10089	3.86505	AHI1
IRE1-mediated unfolded protein response (GO:0036498)	1957-02-01	0.287652	0.442121	0	0	1.91835	2.39027	GFPT1;SEC61B
cellular divalent inorganic cation homeostasis (GO:0072503)	3/101	0.291468	0.44733	0	0	1.61575	1.99193	SLC24A3;VAPB;ATP2B1
regulation of protein ubiquitination (GO:0031396)	3/101	0.291468	0.44733	0	0	1.61575	1.99193	HSP90AA1;HSP90AB1;RPS3
DNA repair (GO:0006281)	7/288	0.292189	0.448109	0	0	1.31675	1.62006	DDB1;USP47;TRIM28;DDX1;RPS3;NUCKS1;BRCC3
phospholipid transport (GO:0015914)	1958-02-01	0.294571	0.449848	0	0	1.884	2.30269	OSBPL8;ATP8A2
regulation of epidermal growth factor receptor signaling pathway (GO:0042058)	1958-02-01	0.294571	0.449848	0	0	1.884	2.30269	DAB2IP;CDH13
autophagosome assembly (GO:0000045)	1958-02-01	0.294571	0.449848	0	0	1.884	2.30269	STX12;RAB7A
post-Golgi vesicle-mediated transport (GO:0006892)	21217	0.294571	0.449848	0	0	1.884	2.30269	SORT1;VTI1B
transcription from RNA polymerase II promoter (GO:0006366)	11/485	0.296861	0.449848	0	0	1.22784	1.4912	DDX5;TRIM28;FUBP1;SRSF1;ELP1;SRSF2;SRSF3;ELP3;SNRPE;TARDBP;SNRPB
positive regulation of transforming growth factor beta receptor signaling pathway (GO:0030511)	2021-01-19	0.300828	0.449848	0	0	2.92846	3.51772	HSP90AB1
positive regulation of chromosome organization (GO:2001252)	2021-01-19	0.300828	0.449848	0	0	2.92846	3.51772	DHX36
protein import into mitochondrial matrix (GO:0030150)	2021-01-19	0.300828	0.449848	0	0	2.92846	3.51772	TIMM50
regulation of protein kinase A signaling (GO:0010738)	44215	0.300828	0.449848	0	0	2.92846	3.51772	AKAP5
primary alcohol metabolic process (GO:0034308)	2021-01-19	0.300828	0.449848	0	0	2.92846	3.51772	GDPD1
protein ADP-ribosylation (GO:0006471)	2021-01-19	0.300828	0.449848	0	0	2.92846	3.51772	SIRT2
histone methylation (GO:0016571)	2021-01-19	0.300828	0.449848	0	0	2.92846	3.51772	PRMT5
negative regulation of cell junction assembly (GO:1901889)	44215	0.300828	0.449848	0	0	2.92846	3.51772	CORO1C
protein targeting to lysosome (GO:0006622)	2021-01-19	0.300828	0.449848	0	0	2.92846	3.51772	RAB7A
protein exit from endoplasmic reticulum (GO:0032527)	2021-01-19	0.300828	0.449848	0	0	2.92846	3.51772	SEC61B
positive regulation of activated T cell proliferation (GO:0042104)	2021-01-19	0.300828	0.449848	0	0	2.92846	3.51772	RPS3
regulation of heterotypic cell-cell adhesion (GO:0034114)	2021-01-19	0.300828	0.449848	0	0	2.92846	3.51772	THY1
morphogenesis of an epithelium (GO:0002009)	2021-01-19	0.300828	0.449848	0	0	2.92846	3.51772	AHI1
negative regulation of response to biotic stimulus (GO:0002832)	2021-01-19	0.300828	0.449848	0	0	2.92846	3.51772	SIRT2
Rac protein signal transduction (GO:0016601)	2021-01-19	0.300828	0.449848	0	0	2.92846	3.51772	CDH13
positive regulation of oxidoreductase activity (GO:0051353)	2021-01-19	0.300828	0.449848	0	0	2.92846	3.51772	POR
regulation of mitochondrial fission (GO:0090140)	2021-01-19	0.300828	0.449848	0	0	2.92846	3.51772	VPS35
regulation of transcription factor import into nucleus (GO:0042990)	2021-01-19	0.300828	0.449848	0	0	2.92846	3.51772	TRIM28
positive regulation of interferon-alpha production (GO:0032727)	2021-01-19	0.300828	0.449848	0	0	2.92846	3.51772	DHX36
striated muscle cell differentiation (GO:0051146)	2021-01-19	0.300828	0.449848	0	0	2.92846	3.51772	SORT1
histone deubiquitination (GO:0016578)	2021-01-19	0.300828	0.449848	0	0	2.92846	3.51772	BRCC3
regulation of neuron migration (GO:2001222)	2021-01-19	0.300828	0.449848	0	0	2.92846	3.51772	DAB2IP
positive regulation of immunoglobulin production (GO:0002639)	2021-01-19	0.300828	0.449848	0	0	2.92846	3.51772	TFRC
nucleotide-sugar biosynthetic process (GO:0009226)	44215	0.300828	0.449848	0	0	2.92846	3.51772	GFPT1
positive regulation of blood coagulation (GO:0030194)	2021-01-19	0.300828	0.449848	0	0	2.92846	3.51772	CNTN1
negative regulation of calcium ion transport (GO:0051926)	44215	0.300828	0.449848	0	0	2.92846	3.51772	INPP5K
positive regulation of adherens junction organization (GO:1903393)	2021-01-19	0.300828	0.449848	0	0	2.92846	3.51772	THY1
positive regulation of epithelial cell differentiation (GO:0030858)	2021-01-19	0.300828	0.449848	0	0	2.92846	3.51772	AHI1
positive regulation of cellular response to transforming growth factor beta stimulus (GO:1903846)	2021-01-19	0.300828	0.449848	0	0	2.92846	3.51772	HSP90AB1
positive regulation of neuron apoptotic process (GO:0043525)	2021-01-19	0.300828	0.449848	0	0	2.92846	3.51772	PRNP
cell junction assembly (GO:0034329)	1959-02-01	0.30148	0.450182	0	0	1.85085	2.21927	CAPZA1;CDH13
regulation of extrinsic apoptotic signaling pathway (GO:2001236)	1959-02-01	0.30148	0.450182	0	0	1.85085	2.21927	MADD;PAK2
peptide metabolic process (GO:0006518)	3/104	0.30676	0.457739	0	0	1.56751	1.85232	EEF1G;HSP90AA1;LNPEP
regulation of stress fiber assembly (GO:0051492)	1960-02-01	0.308378	0.459827	0	0	1.81885	2.13975	TPM1;INPP5K
positive regulation of interleukin-2 production (GO:0032743)	2021-01-20	0.313879	0.460503	0	0	2.77419	3.21459	RPS3
Golgi to endosome transport (GO:0006895)	2021-01-20	0.313879	0.460503	0	0	2.77419	3.21459	SORT1
cell projection assembly (GO:0030031)	2021-01-20	0.313879	0.460503	0	0	2.77419	3.21459	NEFH
regulation of endoplasmic reticulum stress-induced intrinsic apoptotic signaling pathway (GO:1902235)	2021-01-20	0.313879	0.460503	0	0	2.77419	3.21459	OPA1
mesoderm formation (GO:0001707)	44216	0.313879	0.460503	0	0	2.77419	3.21459	ITGA3
negative regulation of intracellular protein transport (GO:0090317)	44216	0.313879	0.460503	0	0	2.77419	3.21459	INPP5K
synapsis (GO:0007129)	2021-01-20	0.313879	0.460503	0	0	2.77419	3.21459	BAG6
negative regulation of ion transport (GO:0043271)	2021-01-20	0.313879	0.460503	0	0	2.77419	3.21459	INPP5K
regulation of lipoprotein lipase activity (GO:0051004)	2021-01-20	0.313879	0.460503	0	0	2.77419	3.21459	SORT1
negative regulation of cyclase activity (GO:0031280)	44216	0.313879	0.460503	0	0	2.77419	3.21459	GABBR1
regulation of cholesterol transport (GO:0032374)	2021-01-20	0.313879	0.460503	0	0	2.77419	3.21459	LRP1
neuromuscular junction development (GO:0007528)	2021-01-20	0.313879	0.460503	0	0	2.77419	3.21459	GPHN
regulation of calcium ion transmembrane transport (GO:1903169)	2021-01-20	0.313879	0.460503	0	0	2.77419	3.21459	PRNP
axon extension (GO:0048675)	2021-01-20	0.313879	0.460503	0	0	2.77419	3.21459	ALCAM
intrinsic apoptotic signaling pathway in response to DNA damage by p53 class mediator (GO:0042771)	2021-01-20	0.313879	0.460503	0	0	2.77419	3.21459	BAG6
negative regulation of protein depolymerization (GO:1901880)	2021-01-20	0.313879	0.460503	0	0	2.77419	3.21459	HDGFL3
melanosome localization (GO:0032400)	2021-01-20	0.313879	0.460503	0	0	2.77419	3.21459	RAB11B
vesicle cytoskeletal trafficking (GO:0099518)	2021-01-20	0.313879	0.460503	0	0	2.77419	3.21459	ACTN4
negative regulation of adenylate cyclase activity (GO:0007194)	2021-01-20	0.313879	0.460503	0	0	2.77419	3.21459	GABBR1
negative regulation of interferon-gamma production (GO:0032689)	2021-01-20	0.313879	0.460503	0	0	2.77419	3.21459	PRNP
chondroitin sulfate biosynthetic process (GO:0030206)	2021-01-20	0.313879	0.460503	0	0	2.77419	3.21459	VCAN
immune response-activating cell surface receptor signaling pathway (GO:0002429)	2021-01-20	0.313879	0.460503	0	0	2.77419	3.21459	BAG6
entrainment of circadian clock by photoperiod (GO:0043153)	2021-01-20	0.313879	0.460503	0	0	2.77419	3.21459	PPP1CA
positive regulation of T cell proliferation (GO:0042102)	1961-02-01	0.315262	0.461562	0	0	1.78793	2.0639	TFRC;RPS3
negative regulation of MAP kinase activity (GO:0043407)	1961-02-01	0.315262	0.461562	0	0	1.78793	2.0639	DAB2IP;INPP5K
regulation of DNA replication (GO:0006275)	1961-02-01	0.315262	0.461562	0	0	1.78793	2.0639	NUCKS1;HRAS
positive regulation of cellular catabolic process (GO:0031331)	3/106	0.316972	0.463743	0	0	1.53692	1.76583	HSP90AA1;KHSRP;VPS35
positive regulation of ERK1 and ERK2 cascade (GO:0070374)	5/201	0.321454	0.467845	0	0	1.34698	1.52869	NTRK2;ERBB4;LMTK2;PHB;HRAS
viral life cycle (GO:0019058)	3/107	0.322081	0.467845	0	0	1.52206	1.72442	HSP90AB1;NEDD4L;RAB7A
positive regulation of cell cycle process (GO:0090068)	3/107	0.322081	0.467845	0	0	1.52206	1.72442	DAB2IP;SIRT2;CIT
positive regulation of epithelial cell proliferation (GO:0050679)	3/107	0.322081	0.467845	0	0	1.52206	1.72442	CNTN1;CDH13;HRAS
negative regulation of response to external stimulus (GO:0032102)	3/107	0.322081	0.467845	0	0	1.52206	1.72442	CASK;VPS35;SIRT2
regulation of protein secretion (GO:0050708)	3/107	0.322081	0.467845	0	0	1.52206	1.72442	ITPR1;MYO18A;STXBP5
DNA damage response, signal transduction by p53 class mediator resulting in cell cycle arrest (GO:0006977)	1962-02-01	0.32213	0.467845	0	0	1.75804	1.99151	CDKN1B;RPL26
positive regulation of cellular component movement (GO:0051272)	2021-01-21	0.326688	0.467845	0	0	2.63535	2.94829	ACTN4
mRNA transcription (GO:0009299)	2021-01-21	0.326688	0.467845	0	0	2.63535	2.94829	DDX5
regulation of interleukin-17 production (GO:0032660)	2021-01-21	0.326688	0.467845	0	0	2.63535	2.94829	PRNP
positive regulation of leukocyte cell-cell adhesion (GO:1903039)	2021-01-21	0.326688	0.467845	0	0	2.63535	2.94829	THY1
energy reserve metabolic process (GO:0006112)	2021-01-21	0.326688	0.467845	0	0	2.63535	2.94829	GFPT1
establishment of spindle orientation (GO:0051294)	2021-01-21	0.326688	0.467845	0	0	2.63535	2.94829	MAP4
ventricular cardiac muscle tissue development (GO:0003229)	2021-01-21	0.326688	0.467845	0	0	2.63535	2.94829	TPM1
negative regulation of ion transmembrane transporter activity (GO:0032413)	2021-01-21	0.326688	0.467845	0	0	2.63535	2.94829	NEDD4L
mitochondrial fission (GO:0000266)	2021-01-21	0.326688	0.467845	0	0	2.63535	2.94829	OPA1
phospholipid translocation (GO:0045332)	2021-01-21	0.326688	0.467845	0	0	2.63535	2.94829	ATP8A2
positive regulation of lamellipodium organization (GO:1902745)	2021-01-21	0.326688	0.467845	0	0	2.63535	2.94829	CORO1C
regulation of macrophage activation (GO:0043030)	2021-01-21	0.326688	0.467845	0	0	2.63535	2.94829	MYO18A
vesicle docking (GO:0048278)	2021-01-21	0.326688	0.467845	0	0	2.63535	2.94829	STX12
negative regulation of protein tyrosine kinase activity (GO:0061099)	2021-01-21	0.326688	0.467845	0	0	2.63535	2.94829	THY1
mitochondrial ATP synthesis coupled proton transport (GO:0042776)	44217	0.326688	0.467845	0	0	2.63535	2.94829	CYC1
cellular response to misfolded protein (GO:0071218)	2021-01-21	0.326688	0.467845	0	0	2.63535	2.94829	BAG6
negative regulation of cAMP biosynthetic process (GO:0030818)	2021-01-21	0.326688	0.467845	0	0	2.63535	2.94829	GABBR1
cellular response to copper ion (GO:0071280)	2021-01-21	0.326688	0.467845	0	0	2.63535	2.94829	PRNP
mitochondrial calcium ion transmembrane transport (GO:0006851)	2021-01-21	0.326688	0.467845	0	0	2.63535	2.94829	PHB
lipid catabolic process (GO:0016042)	2021-01-21	0.326688	0.467845	0	0	2.63535	2.94829	SIRT2
photoperiodism (GO:0009648)	2021-01-21	0.326688	0.467845	0	0	2.63535	2.94829	PPP1CA
phosphatidylserine acyl-chain remodeling (GO:0036150)	2021-01-21	0.326688	0.467845	0	0	2.63535	2.94829	OSBPL8
negative regulation of cell cycle arrest (GO:0071157)	2021-01-21	0.326688	0.467845	0	0	2.63535	2.94829	HSP90AB1
glutamate metabolic process (GO:0006536)	2021-01-21	0.326688	0.467845	0	0	2.63535	2.94829	GCLC
signal transduction involved in mitotic G1 DNA damage checkpoint (GO:0072431)	1963-02-01	0.328981	0.470807	0	0	1.72913	1.92237	CDKN1B;RPL26
regulation of I-kappaB kinase/NF-kappaB signaling (GO:0043122)	5/204	0.332467	0.475144	0	0	1.32647	1.46073	USP10;CPNE1;DAB2IP;ZDHHC17;SQSTM1
homophilic cell adhesion via plasma membrane adhesion molecules (GO:0007156)	1964-02-01	0.335813	0.475144	0	0	1.70116	1.8563	CDH13;CD200
NADH dehydrogenase complex assembly (GO:0010257)	1964-02-01	0.335813	0.475144	0	0	1.70116	1.8563	NDUFA8;NDUFB10
mitochondrial respiratory chain complex I biogenesis (GO:0097031)	1964-02-01	0.335813	0.475144	0	0	1.70116	1.8563	NDUFA8;NDUFB10
mitochondrial respiratory chain complex I assembly (GO:0032981)	1964-02-01	0.335813	0.475144	0	0	1.70116	1.8563	NDUFA8;NDUFB10
glycerophospholipid metabolic process (GO:0006650)	23408	0.335813	0.475144	0	0	1.70116	1.8563	CPNE1;PGP
positive regulation of nucleic acid-templated transcription (GO:1903508)	11/502	0.335945	0.475144	0	0	1.18428	1.29182	DDX17;PSMC5;ILF3;DDX5;TRIM28;ERBB4;CNBP;HNRNPD;INPP5K;PHB;YWHAH
viral gene expression (GO:0019080)	3/110	0.337407	0.475144	0	0	1.47916	1.60706	RPS3;RPS3A;RPL26
negative regulation of cytokine production (GO:0001818)	3/110	0.337407	0.475144	0	0	1.47916	1.60706	PRNP;TRAF3;PIN1
cellular response to insulin stimulus (GO:0032869)	3/110	0.337407	0.475144	0	0	1.47916	1.60706	ATP6V1G1;INPP5K;SORBS1
regulation of interferon-gamma-mediated signaling pathway (GO:0060334)	44218	0.339259	0.475144	0	0	2.50973	2.713	HSP90AB1
regulation of vascular endothelial growth factor receptor signaling pathway (GO:0030947)	44218	0.339259	0.475144	0	0	2.50973	2.713	DAB2IP
regulation of calcium ion import (GO:0090279)	44218	0.339259	0.475144	0	0	2.50973	2.713	PRNP
protein localization to cilium (GO:0061512)	2021-01-22	0.339259	0.475144	0	0	2.50973	2.713	TUB
negative regulation of protein polymerization (GO:0032272)	2021-01-22	0.339259	0.475144	0	0	2.50973	2.713	TUBB4A
NAD biosynthetic process (GO:0009435)	2021-01-22	0.339259	0.475144	0	0	2.50973	2.713	NAMPT
cellular response to nerve growth factor stimulus (GO:1990090)	2021-01-22	0.339259	0.475144	0	0	2.50973	2.713	NTRK2
protein homotrimerization (GO:0070207)	2021-01-22	0.339259	0.475144	0	0	2.50973	2.713	SIGMAR1
positive regulation of protein targeting to membrane (GO:0090314)	2021-01-22	0.339259	0.475144	0	0	2.50973	2.713	PRNP
lipid translocation (GO:0034204)	2021-01-22	0.339259	0.475144	0	0	2.50973	2.713	ATP8A2
activation of phospholipase C activity (GO:0007202)	2021-01-22	0.339259	0.475144	0	0	2.50973	2.713	GNAQ
hematopoietic progenitor cell differentiation (GO:0002244)	2021-01-22	0.339259	0.475144	0	0	2.50973	2.713	PRRC2C
nuclear transport (GO:0051169)	2021-01-22	0.339259	0.475144	0	0	2.50973	2.713	ANP32A
negative regulation of response to endoplasmic reticulum stress (GO:1903573)	2021-01-22	0.339259	0.475144	0	0	2.50973	2.713	OPA1
sulfur amino acid metabolic process (GO:0000096)	2021-01-22	0.339259	0.475144	0	0	2.50973	2.713	GCLC
purine-containing compound biosynthetic process (GO:0072522)	44218	0.339259	0.475144	0	0	2.50973	2.713	PRPS1
negative regulation of protein import into nucleus (GO:0042308)	44218	0.339259	0.475144	0	0	2.50973	2.713	DAB2IP
viral genome replication (GO:0019079)	44218	0.339259	0.475144	0	0	2.50973	2.713	EEA1
negative regulation of nervous system development (GO:0051961)	44218	0.339259	0.475144	0	0	2.50973	2.713	HOOK3
negative regulation of lyase activity (GO:0051350)	44218	0.339259	0.475144	0	0	2.50973	2.713	GABBR1
positive regulation of phosphatase activity (GO:0010922)	44218	0.339259	0.475144	0	0	2.50973	2.713	HSP90AB1
glucose transport (GO:0015758)	2021-01-22	0.339259	0.475144	0	0	2.50973	2.713	SORT1
regulation of cell division (GO:0051302)	1965-02-01	0.342625	0.479537	0	0	1.67407	1.79313	PIN1;SIRT2
positive regulation of transcription, DNA-templated (GO:0045893)	23/1120	0.346665	0.484869	0	0	1.11001	1.17595	DDX17;DDX5;CNBP;DAB2IP;PHB;SIRT2;AHI1;PSMC5;ILF3;HNRNPK;TRIM28;ERBB4;GPRIN1;NAMPT;DHX36;HNRNPD;INPP5K;PIN1;CDH13;HRAS;SQSTM1;PFKM;YWHAH
phosphatidylinositol metabolic process (GO:0046488)	3/112	0.347615	0.485874	0	0	1.45187	1.53413	PLEKHA1;SACM1L;INPP5K
negative regulation of epithelial cell proliferation (GO:0050680)	1966-02-01	0.349414	0.486574	0	0	1.64783	1.73269	DAB2IP;CASK
cellular response to catecholamine stimulus (GO:0071870)	2021-01-23	0.351595	0.486574	0	0	2.39553	2.50398	SIRT2
cholesterol efflux (GO:0033344)	2021-01-23	0.351595	0.486574	0	0	2.39553	2.50398	STX12
glycolytic process (GO:0006096)	2021-01-23	0.351595	0.486574	0	0	2.39553	2.50398	PFKM
regulation of telomere capping (GO:1904353)	2021-01-23	0.351595	0.486574	0	0	2.39553	2.50398	HNRNPD
cell-cell adhesion mediated by cadherin (GO:0044331)	2021-01-23	0.351595	0.486574	0	0	2.39553	2.50398	CDH13
lamellipodium assembly (GO:0030032)	2021-01-23	0.351595	0.486574	0	0	2.39553	2.50398	CDH13
glutamine family amino acid metabolic process (GO:0009064)	2021-01-23	0.351595	0.486574	0	0	2.39553	2.50398	GCLC
positive regulation of mRNA catabolic process (GO:0061014)	2021-01-23	0.351595	0.486574	0	0	2.39553	2.50398	KHSRP
membrane assembly (GO:0071709)	44219	0.351595	0.486574	0	0	2.39553	2.50398	NLGN1
cellular response to interleukin-6 (GO:0071354)	2021-01-23	0.351595	0.486574	0	0	2.39553	2.50398	PHB
divalent inorganic cation homeostasis (GO:0072507)	2021-01-23	0.351595	0.486574	0	0	2.39553	2.50398	GPRIN1
positive regulation of monooxygenase activity (GO:0032770)	2021-01-23	0.351595	0.486574	0	0	2.39553	2.50398	POR
positive regulation of cell junction assembly (GO:1901890)	2021-01-23	0.351595	0.486574	0	0	2.39553	2.50398	THY1
regulation of ion homeostasis (GO:2000021)	2021-01-23	0.351595	0.486574	0	0	2.39553	2.50398	NEDD4L
viral transcription (GO:0019083)	3/113	0.352714	0.4878	0	0	1.4386	1.49916	RPS3;RPS3A;RPL26
positive regulation of endothelial cell proliferation (GO:0001938)	24504	0.356179	0.491297	0	0	1.62239	1.67483	CNTN1;CDH13
negative regulation of protein binding (GO:0032091)	1967-02-01	0.356179	0.491297	0	0	1.62239	1.67483	PIN1;PPP1CA
extrinsic apoptotic signaling pathway (GO:0097191)	1967-02-01	0.356179	0.491297	0	0	1.62239	1.67483	SORT1;DAB2IP
insulin receptor signaling pathway (GO:0008286)	1967-02-01	0.356179	0.491297	0	0	1.62239	1.67483	ATP6V1G1;SORBS1
positive regulation of protein phosphorylation (GO:0001934)	9/412	0.362493	0.495807	0	0	1.17945	1.19685	PRNP;NTRK2;ERBB4;FMR1;DAB2IP;LMTK2;PIN1;HRAS;PAK2
negative regulation of cysteine-type endopeptidase activity involved in apoptotic process (GO:0043154)	1968-02-01	0.362919	0.495807	0	0	1.59773	1.61942	USP47;PAK2
monocarboxylic acid biosynthetic process (GO:0072330)	24869	0.362919	0.495807	0	0	1.59773	1.61942	VCAN;ASNS
peptidyl-threonine phosphorylation (GO:0018107)	24869	0.362919	0.495807	0	0	1.59773	1.61942	LMTK2;DCLK2
positive regulation of T cell activation (GO:0050870)	24869	0.362919	0.495807	0	0	1.59773	1.61942	TFRC;THY1
positive regulation of microtubule polymerization (GO:0031116)	2021-01-24	0.363702	0.495807	0	0	2.29126	2.31743	RPS3
membrane protein intracellular domain proteolysis (GO:0031293)	44220	0.363702	0.495807	0	0	2.29126	2.31743	NCSTN
cellular lipid catabolic process (GO:0044242)	2021-01-24	0.363702	0.495807	0	0	2.29126	2.31743	SIRT2
negative regulation of protein localization to membrane (GO:1905476)	2021-01-24	0.363702	0.495807	0	0	2.29126	2.31743	INPP5K
regulation of chromosome organization (GO:0033044)	44220	0.363702	0.495807	0	0	2.29126	2.31743	HNRNPD
negative regulation of sequestering of calcium ion (GO:0051283)	44220	0.363702	0.495807	0	0	2.29126	2.31743	ITPR1
ATP generation from ADP (GO:0006757)	2021-01-24	0.363702	0.495807	0	0	2.29126	2.31743	PFKM
camera-type eye development (GO:0043010)	2021-01-24	0.363702	0.495807	0	0	2.29126	2.31743	RAB3GAP1
negative regulation of cyclin-dependent protein serine/threonine kinase activity (GO:0045736)	2021-01-24	0.363702	0.495807	0	0	2.29126	2.31743	CDKN1B
positive regulation of microtubule polymerization or depolymerization (GO:0031112)	2021-01-24	0.363702	0.495807	0	0	2.29126	2.31743	RPS3
positive regulation of dephosphorylation (GO:0035306)	2021-01-24	0.363702	0.495807	0	0	2.29126	2.31743	PIN1
DNA replication initiation (GO:0006270)	2021-01-24	0.363702	0.495807	0	0	2.29126	2.31743	PURA
mammary gland development (GO:0030879)	2021-01-24	0.363702	0.495807	0	0	2.29126	2.31743	ERBB4
glycerophospholipid biosynthetic process (GO:0046474)	4/164	0.366047	0.49868	0	0	1.3189	1.32549	PLEKHA1;SACM1L;CPNE1;INPP5K
glycolytic process through glucose-6-phosphate (GO:0061620)	2021-01-25	0.375583	0.502855	0	0	2.19568	2.15017	PFKM
negative regulation of wound healing (GO:0061045)	2021-01-25	0.375583	0.502855	0	0	2.19568	2.15017	CASK
organophosphate ester transport (GO:0015748)	2021-01-25	0.375583	0.502855	0	0	2.19568	2.15017	OSBPL8
canonical glycolysis (GO:0061621)	2021-01-25	0.375583	0.502855	0	0	2.19568	2.15017	PFKM
glucose catabolic process to pyruvate (GO:0061718)	2021-01-25	0.375583	0.502855	0	0	2.19568	2.15017	PFKM
response to copper ion (GO:0046688)	44221	0.375583	0.502855	0	0	2.19568	2.15017	PRNP
protein import into nucleus, translocation (GO:0000060)	2021-01-25	0.375583	0.502855	0	0	2.19568	2.15017	SEC61B
glial cell differentiation (GO:0010001)	44221	0.375583	0.502855	0	0	2.19568	2.15017	PTPRZ1
lamellipodium organization (GO:0097581)	2021-01-25	0.375583	0.502855	0	0	2.19568	2.15017	CDH13
potassium ion homeostasis (GO:0055075)	2021-01-25	0.375583	0.502855	0	0	2.19568	2.15017	SLC12A5
misfolded or incompletely synthesized protein catabolic process (GO:0006515)	2021-01-25	0.375583	0.502855	0	0	2.19568	2.15017	BAG6
peptide catabolic process (GO:0043171)	44221	0.375583	0.502855	0	0	2.19568	2.15017	LNPEP
positive regulation of nuclear division (GO:0051785)	44221	0.375583	0.502855	0	0	2.19568	2.15017	SIRT2
chondroitin sulfate proteoglycan biosynthetic process (GO:0050650)	44221	0.375583	0.502855	0	0	2.19568	2.15017	VCAN
regulation of DNA damage response, signal transduction by p53 class mediator (GO:0043516)	2021-01-25	0.375583	0.502855	0	0	2.19568	2.15017	DDX5
RNA splicing, via transesterification reactions (GO:0000375)	2021-01-25	0.375583	0.502855	0	0	2.19568	2.15017	KHSRP
negative regulation of cellular protein localization (GO:1903828)	2021-01-25	0.375583	0.502855	0	0	2.19568	2.15017	NEDD4L
cellular response to vascular endothelial growth factor stimulus (GO:0035924)	2021-01-25	0.375583	0.502855	0	0	2.19568	2.15017	DAB2IP
regulation of potassium ion transmembrane transporter activity (GO:1901016)	2021-01-25	0.375583	0.502855	0	0	2.19568	2.15017	NEDD4L
long-chain fatty acid transport (GO:0015909)	2021-01-25	0.375583	0.502855	0	0	2.19568	2.15017	ACSL1
long-chain fatty-acyl-CoA metabolic process (GO:0035336)	44221	0.375583	0.502855	0	0	2.19568	2.15017	ACSL1
negative regulation of epithelial to mesenchymal transition (GO:0010719)	2021-01-25	0.375583	0.502855	0	0	2.19568	2.15017	DAB2IP
regulation of nervous system development (GO:0051960)	2021-01-25	0.375583	0.502855	0	0	2.19568	2.15017	SIRT2
positive regulation of calcium ion transmembrane transport (GO:1904427)	2021-01-25	0.375583	0.502855	0	0	2.19568	2.15017	THY1
L-amino acid transport (GO:0015807)	2021-01-25	0.375583	0.502855	0	0	2.19568	2.15017	SLC25A12
signal transduction in response to DNA damage (GO:0042770)	2021-01-25	0.375583	0.502855	0	0	2.19568	2.15017	USP10
regulation of protein import into nucleus (GO:0042306)	2021-01-25	0.375583	0.502855	0	0	2.19568	2.15017	GNAQ
stress-activated protein kinase signaling cascade (GO:0031098)	1970-02-01	0.376317	0.502874	0	0	1.55058	1.51542	PAK2;SKP1
protein ubiquitination involved in ubiquitin-dependent protein catabolic process (GO:0042787)	1970-02-01	0.376317	0.502874	0	0	1.55058	1.51542	NEDD4L;RBX1
neuropeptide signaling pathway (GO:0007218)	1970-02-01	0.376317	0.502874	0	0	1.55058	1.51542	SORT1;NTSR1
cellular macromolecule biosynthetic process (GO:0034645)	8/367	0.377665	0.504355	0	0	1.17636	1.14547	EFTUD2;EEF1A1;EEF1G;EEF1A2;RPS3;RPS3A;RPL26;EEF2
nuclear import (GO:0051170)	1971-02-01	0.382973	0.510743	0	0	1.52803	1.46659	SNRPE;SNRPB
organelle membrane fusion (GO:0090174)	1971-02-01	0.382973	0.510743	0	0	1.52803	1.46659	EEA1;STX12
regulation of phosphorylation (GO:0042325)	3/119	0.383179	0.510743	0	0	1.36377	1.3082	CDKN1B;SIRT2;CORO1C
sodium ion homeostasis (GO:0055078)	44222	0.387243	0.512255	0	0	2.10774	1.99962	NEDD4L
positive regulation of synapse assembly (GO:0051965)	2021-01-26	0.387243	0.512255	0	0	2.10774	1.99962	NLGN1
monovalent inorganic cation homeostasis (GO:0055067)	44222	0.387243	0.512255	0	0	2.10774	1.99962	SLC12A5
lipid modification (GO:0030258)	2021-01-26	0.387243	0.512255	0	0	2.10774	1.99962	DGKZ
nucleotide biosynthetic process (GO:0009165)	2021-01-26	0.387243	0.512255	0	0	2.10774	1.99962	PRPS1
regulation of p38MAPK cascade (GO:1900744)	2021-01-26	0.387243	0.512255	0	0	2.10774	1.99962	DAB2IP
positive regulation of wound healing (GO:0090303)	2021-01-26	0.387243	0.512255	0	0	2.10774	1.99962	HRAS
internal peptidyl-lysine acetylation (GO:0018393)	2021-01-26	0.387243	0.512255	0	0	2.10774	1.99962	BAG6
regulation of muscle contraction (GO:0006937)	2021-01-26	0.387243	0.512255	0	0	2.10774	1.99962	TPM1
regulation of viral entry into host cell (GO:0046596)	44222	0.387243	0.512255	0	0	2.10774	1.99962	SNX3
GPI anchor metabolic process (GO:0006505)	2021-01-26	0.387243	0.512255	0	0	2.10774	1.99962	DPM1
RNA biosynthetic process (GO:0032774)	2021-01-26	0.387243	0.512255	0	0	2.10774	1.99962	PRMT5
enzyme linked receptor protein signaling pathway (GO:0007167)	3/120	0.388228	0.512911	0	0	1.35204	1.27925	AHI1;ERBB4;PALM2
macromolecular complex assembly (GO:0065003)	3/120	0.388228	0.512911	0	0	1.35204	1.27925	CAPZA1;ELP1;SHANK1
Rho protein signal transduction (GO:0007266)	1972-02-01	0.389598	0.51375	0	0	1.50612	1.41973	CDH13;PAK2
regulation of epithelial cell proliferation (GO:0050678)	1972-02-01	0.389598	0.51375	0	0	1.50612	1.41973	DAB2IP;HRAS
negative regulation of cell cycle (GO:0045786)	1972-02-01	0.389598	0.51375	0	0	1.50612	1.41973	CDKN1B;CAMK2N1
peptidyl-serine modification (GO:0018209)	4/170	0.391405	0.515808	0	0	1.27084	1.19206	CSNK1A1;LMTK2;DCLK2;PAK2
transcription-coupled nucleotide-excision repair (GO:0006283)	1973-02-01	0.396191	0.520176	0	0	1.48483	1.37475	DDB1;RBX1
canonical Wnt signaling pathway (GO:0060070)	1973-02-01	0.396191	0.520176	0	0	1.48483	1.37475	CSNK1A1;PPP1CA
regulation of calcium ion transmembrane transporter activity (GO:1901019)	2021-01-27	0.398686	0.520176	0	0	2.02657	1.8636	HPCA
ATP synthesis coupled proton transport (GO:0015986)	2021-01-27	0.398686	0.520176	0	0	2.02657	1.8636	CYC1
mRNA polyadenylation (GO:0006378)	2021-01-27	0.398686	0.520176	0	0	2.02657	1.8636	AHCYL1
regulation of intracellular steroid hormone receptor signaling pathway (GO:0033143)	44223	0.398686	0.520176	0	0	2.02657	1.8636	DDX5
negative regulation of peptidyl-tyrosine phosphorylation (GO:0050732)	44223	0.398686	0.520176	0	0	2.02657	1.8636	THY1
positive regulation of lipid kinase activity (GO:0090218)	2021-01-27	0.398686	0.520176	0	0	2.02657	1.8636	EEF1A2
negative regulation of synaptic transmission (GO:0050805)	2021-01-27	0.398686	0.520176	0	0	2.02657	1.8636	SHANK2
cristae formation (GO:0042407)	2021-01-27	0.398686	0.520176	0	0	2.02657	1.8636	CHCHD3
endocytic recycling (GO:0032456)	2021-01-27	0.398686	0.520176	0	0	2.02657	1.8636	LMTK2
regulation of protein localization to nucleus (GO:1900180)	2021-01-27	0.398686	0.520176	0	0	2.02657	1.8636	PIN1
release of sequestered calcium ion into cytosol (GO:0051209)	2021-01-27	0.398686	0.520176	0	0	2.02657	1.8636	ITPR1
phosphatidylserine metabolic process (GO:0006658)	2021-01-27	0.398686	0.520176	0	0	2.02657	1.8636	OSBPL8
regulation of neurotransmitter secretion (GO:0046928)	2021-01-27	0.398686	0.520176	0	0	2.02657	1.8636	FMR1
cargo loading into vesicle (GO:0035459)	2021-01-27	0.398686	0.520176	0	0	2.02657	1.8636	SAR1A
mitotic spindle organization (GO:0007052)	1974-02-01	0.402751	0.524828	0	0	1.46414	1.33154	ZNF207;MAP4
glucose homeostasis (GO:0042593)	1974-02-01	0.402751	0.524828	0	0	1.46414	1.33154	INPP5K;NUCKS1
cellular calcium ion homeostasis (GO:0006874)	3/123	0.403313	0.525233	0	0	1.31804	1.19684	SLC24A3;VAPB;ATP2B1
regulation of cell proliferation (GO:0042127)	15/740	0.407823	0.525995	0	0	1.09239	0.97979	NTRK2;CDKN1B;ATP8A2;CNBP;DAB2IP;PHB;SIRT2;CAPNS1;DLG3;CAMK2N1;ERBB4;NAMPT;WDR6;CDH13;HRAS
regulation of defense response (GO:0031347)	27426	0.409278	0.525995	0	0	1.44401	1.29002	PSMA6;TRAF3
cAMP-mediated signaling (GO:0019933)	1975-02-01	0.409278	0.525995	0	0	1.44401	1.29002	GNAQ;GNAS
negative regulation of endocytosis (GO:0045806)	2021-01-28	0.409915	0.525995	0	0	1.95141	1.74028	SNX3
RNA polyadenylation (GO:0043631)	2021-01-28	0.409915	0.525995	0	0	1.95141	1.74028	AHCYL1
negative regulation of intracellular steroid hormone receptor signaling pathway (GO:0033144)	2021-01-28	0.409915	0.525995	0	0	1.95141	1.74028	PHB
cellular response to ketone (GO:1901655)	2021-01-28	0.409915	0.525995	0	0	1.95141	1.74028	GNAI1
acute inflammatory response (GO:0002526)	2021-01-28	0.409915	0.525995	0	0	1.95141	1.74028	CNTN1
cellular amino acid biosynthetic process (GO:0008652)	2021-01-28	0.409915	0.525995	0	0	1.95141	1.74028	ASNS
negative regulation of response to DNA damage stimulus (GO:2001021)	2021-01-28	0.409915	0.525995	0	0	1.95141	1.74028	RPS3
positive regulation of cytosolic calcium ion concentration involved in phospholipase C-activating G-protein coupled signaling pathway (GO:0051482)	2021-01-28	0.409915	0.525995	0	0	1.95141	1.74028	GRM1
positive regulation of extrinsic apoptotic signaling pathway (GO:2001238)	2021-01-28	0.409915	0.525995	0	0	1.95141	1.74028	PAK2
organelle fission (GO:0048285)	2021-01-28	0.409915	0.525995	0	0	1.95141	1.74028	OPA1
lytic vacuole organization (GO:0080171)	2021-01-28	0.409915	0.525995	0	0	1.95141	1.74028	HOOK3
positive regulation of cell communication (GO:0010647)	2021-01-28	0.409915	0.525995	0	0	1.95141	1.74028	HOMER1
cardiac muscle cell action potential involved in contraction (GO:0086002)	44224	0.409915	0.525995	0	0	1.95141	1.74028	NEDD4L
positive regulation of calcium-mediated signaling (GO:0050850)	2021-01-28	0.409915	0.525995	0	0	1.95141	1.74028	CDH13
production of miRNAs involved in gene silencing by miRNA (GO:0035196)	2021-01-28	0.409915	0.525995	0	0	1.95141	1.74028	HNRNPA2B1
regulation of lipid biosynthetic process (GO:0046890)	2021-01-28	0.409915	0.525995	0	0	1.95141	1.74028	SORBS1
antigen processing and presentation of peptide antigen via MHC class I (GO:0002474)	2021-01-28	0.409915	0.525995	0	0	1.95141	1.74028	CANX
regulation of defense response to virus by virus (GO:0050690)	44224	0.409915	0.525995	0	0	1.95141	1.74028	PAK2
positive regulation of lipid biosynthetic process (GO:0046889)	44224	0.409915	0.525995	0	0	1.95141	1.74028	SORBS1
regulation of adenylate cyclase activity (GO:0045761)	2021-01-28	0.409915	0.525995	0	0	1.95141	1.74028	GABBR1
protein K63-linked deubiquitination (GO:0070536)	2021-01-28	0.409915	0.525995	0	0	1.95141	1.74028	BRCC3
protein autophosphorylation (GO:0046777)	4/175	0.412427	0.528895	0	0	1.23336	1.09239	NTRK2;ERBB4;LMTK2;PAK2
negative regulation of multicellular organismal process (GO:0051241)	3/125	0.413311	0.529705	0	0	1.2963	1.14535	DAB2IP;CORO1C;RAB11FIP5
response to interleukin-1 (GO:0070555)	1976-02-01	0.415769	0.532323	0	0	1.42442	1.2501	USP10;DAB2IP
cellular response to DNA damage stimulus (GO:0006974)	7/329	0.415861	0.532323	0	0	1.14665	1.00607	DDB1;USP47;TRIM28;USP10;FMR1;SETD7;RPS3
cellular protein metabolic process (GO:0044267)	10/484	0.416131	0.532343	0	0	1.11315	0.975956	EEF1A1;NCSTN;VCAN;FBXO2;RPN1;EEF1A2;RPS3;DAB2IP;RPS3A;RPL26
positive regulation of MAP kinase activity (GO:0043406)	4/177	0.420795	0.535876	0	0	1.21898	1.05516	MADD;RPS3;DAB2IP;HRAS
dicarboxylic acid transport (GO:0006835)	2021-01-29	0.420936	0.535876	0	0	1.88162	1.62812	SLC25A12
TRIF-dependent toll-like receptor signaling pathway (GO:0035666)	2021-01-29	0.420936	0.535876	0	0	1.88162	1.62812	TRAF3
positive regulation of histone modification (GO:0031058)	2021-01-29	0.420936	0.535876	0	0	1.88162	1.62812	FMR1
regulation of chromosome segregation (GO:0051983)	2021-01-29	0.420936	0.535876	0	0	1.88162	1.62812	ZNF207
skeletal muscle organ development (GO:0060538)	2021-01-29	0.420936	0.535876	0	0	1.88162	1.62812	IGSF8
carbohydrate derivative biosynthetic process (GO:1901137)	44225	0.420936	0.535876	0	0	1.88162	1.62812	ALG2
striated muscle tissue development (GO:0014706)	44225	0.420936	0.535876	0	0	1.88162	1.62812	IGSF8
water-soluble vitamin metabolic process (GO:0006767)	1977-02-01	0.422225	0.536866	0	0	1.40535	1.21172	PDXK;PDZD11
regulation of cytokinesis (GO:0032465)	1977-02-01	0.422225	0.536866	0	0	1.40535	1.21172	PIN1;CIT
adenylate cyclase-activating G-protein coupled receptor signaling pathway (GO:0007189)	1978-02-01	0.428644	0.540784	0	0	1.38679	1.17479	GNAQ;GNAS
regulation of cellular response to heat (GO:1900034)	1978-02-01	0.428644	0.540784	0	0	1.38679	1.17479	HSP90AA1;HSP90AB1
phosphorylation (GO:0016310)	8/386	0.431429	0.540784	0	0	1.11613	0.938273	ILF3;PRKAR1B;CSNK1A1;ELP1;LMTK2;CDC42BPA;PAK2;DGKZ
regulation of actin cytoskeleton reorganization (GO:2000249)	44226	0.431751	0.540784	0	0	1.81665	1.52581	HRAS
regulation of protein insertion into mitochondrial membrane involved in apoptotic signaling pathway (GO:1900739)	44226	0.431751	0.540784	0	0	1.81665	1.52581	YWHAH
negative regulation of cation channel activity (GO:2001258)	2021-01-30	0.431751	0.540784	0	0	1.81665	1.52581	FMR1
replication fork processing (GO:0031297)	2021-01-30	0.431751	0.540784	0	0	1.81665	1.52581	NUCKS1
cellular response to cAMP (GO:0071320)	44226	0.431751	0.540784	0	0	1.81665	1.52581	INPP5K
cellular response to drug (GO:0035690)	44226	0.431751	0.540784	0	0	1.81665	1.52581	TFRC
activation of protein kinase B activity (GO:0032148)	2021-01-30	0.431751	0.540784	0	0	1.81665	1.52581	OSBPL8
protein palmitoylation (GO:0018345)	2021-01-30	0.431751	0.540784	0	0	1.81665	1.52581	ZDHHC17
activation of JUN kinase activity (GO:0007257)	2021-01-30	0.431751	0.540784	0	0	1.81665	1.52581	DAB2IP
fatty-acyl-CoA biosynthetic process (GO:0046949)	44226	0.431751	0.540784	0	0	1.81665	1.52581	ACSL1
'de novo' posttranslational protein folding (GO:0051084)	44226	0.431751	0.540784	0	0	1.81665	1.52581	CHCHD4
MyD88-independent toll-like receptor signaling pathway (GO:0002756)	2021-01-30	0.431751	0.540784	0	0	1.81665	1.52581	TRAF3
positive regulation of cation channel activity (GO:2001259)	2021-01-30	0.431751	0.540784	0	0	1.81665	1.52581	SHANK3
protein localization to lysosome (GO:0061462)	2021-01-30	0.431751	0.540784	0	0	1.81665	1.52581	RAB7A
positive regulation of phospholipase C activity (GO:0010863)	2021-01-30	0.431751	0.540784	0	0	1.81665	1.52581	GNAQ
aminoglycan metabolic process (GO:0006022)	2021-01-30	0.431751	0.540784	0	0	1.81665	1.52581	VCAN
artery morphogenesis (GO:0048844)	44226	0.431751	0.540784	0	0	1.81665	1.52581	LRP1
positive regulation of protein insertion into mitochondrial membrane involved in apoptotic signaling pathway (GO:1900740)	2021-01-30	0.431751	0.540784	0	0	1.81665	1.52581	YWHAH
positive regulation of B cell proliferation (GO:0030890)	44226	0.431751	0.540784	0	0	1.81665	1.52581	TFRC
regulation of protein polymerization (GO:0032271)	2021-01-30	0.431751	0.540784	0	0	1.81665	1.52581	MAP2
nuclear envelope organization (GO:0006998)	2021-01-30	0.431751	0.540784	0	0	1.81665	1.52581	TMEM43
chondroitin sulfate metabolic process (GO:0030204)	2021-01-30	0.431751	0.540784	0	0	1.81665	1.52581	VCAN
regulation of endothelial cell proliferation (GO:0001936)	1979-02-01	0.435025	0.54456	0	0	1.36871	1.13925	CNTN1;CDH13
retrograde vesicle-mediated transport, Golgi to ER (GO:0006890)	1980-02-01	0.441367	0.549486	0	0	1.3511	1.10503	COPB1;LMAN2
regulation of phosphatidylinositol 3-kinase signaling (GO:0014066)	1980-02-01	0.441367	0.549486	0	0	1.3511	1.10503	NTRK2;DAB2IP
spindle assembly (GO:0051225)	1980-02-01	0.441367	0.549486	0	0	1.3511	1.10503	ZNF207;RPS3
positive regulation of stress-activated MAPK cascade (GO:0032874)	1980-02-01	0.441367	0.549486	0	0	1.3511	1.10503	DAB2IP;HRAS
negative regulation of defense response (GO:0031348)	1980-02-01	0.441367	0.549486	0	0	1.3511	1.10503	VPS35;SIRT2
negative regulation of toll-like receptor signaling pathway (GO:0034122)	2021-01-31	0.442365	0.549486	0	0	1.756	1.43223	DAB2IP
positive regulation of ubiquitin-protein transferase activity (GO:0051443)	2021-01-31	0.442365	0.549486	0	0	1.756	1.43223	PIN1
regulation of ubiquitin-protein transferase activity (GO:0051438)	2021-01-31	0.442365	0.549486	0	0	1.756	1.43223	PIN1
positive regulation of release of sequestered calcium ion into cytosol (GO:0051281)	2021-01-31	0.442365	0.549486	0	0	1.756	1.43223	THY1
cofactor biosynthetic process (GO:0051188)	2021-01-31	0.442365	0.549486	0	0	1.756	1.43223	GPHN
lysosome organization (GO:0007040)	44227	0.442365	0.549486	0	0	1.756	1.43223	HOOK3
sarcomere organization (GO:0045214)	2021-01-31	0.442365	0.549486	0	0	1.756	1.43223	TPM1
protein destabilization (GO:0031648)	44227	0.442365	0.549486	0	0	1.756	1.43223	PRNP
negative regulation of cell death (GO:0060548)	29618	0.44767	0.55509	0	0	1.33392	1.07207	PSMC5;VPS35
negative regulation of cell cycle process (GO:0010948)	1981-02-01	0.44767	0.55509	0	0	1.33392	1.07207	HSP90AB1;DAB2IP
positive regulation of binding (GO:0051099)	29618	0.44767	0.55509	0	0	1.33392	1.07207	LRP1;SIRT2
cilium assembly (GO:0060271)	6/288	0.449933	0.557146	0	0	1.12151	0.895705	ACTR3;AHI1;HSP90AA1;RILPL1;TUBB4B;TUBB4A
cellular response to organic substance (GO:0071310)	3/133	0.452725	0.557146	0	0	1.21603	0.963667	KHSRP;INPP5K;PTPN5
Fc-gamma receptor signaling pathway involved in phagocytosis (GO:0038096)	3/133	0.452725	0.557146	0	0	1.21603	0.963667	ACTR3;HSP90AA1;HSP90AB1
negative regulation of calcium ion transmembrane transporter activity (GO:1901020)	1932-01-01	0.452781	0.557146	0	0	1.69927	1.34641	FMR1
oxoacid metabolic process (GO:0043436)	1932-01-01	0.452781	0.557146	0	0	1.69927	1.34641	PPA2
sister chromatid segregation (GO:0000819)	1932-01-01	0.452781	0.557146	0	0	1.69927	1.34641	ZNF207
protein trimerization (GO:0070206)	1932-01-01	0.452781	0.557146	0	0	1.69927	1.34641	SIGMAR1
microtubule bundle formation (GO:0001578)	1932-01-01	0.452781	0.557146	0	0	1.69927	1.34641	ZNF207
GPI anchor biosynthetic process (GO:0006506)	1932-01-01	0.452781	0.557146	0	0	1.69927	1.34641	DPM1
purine ribonucleoside triphosphate metabolic process (GO:0009205)	1932-01-01	0.452781	0.557146	0	0	1.69927	1.34641	OPA1
negative regulation of fat cell differentiation (GO:0045599)	1932-01-01	0.452781	0.557146	0	0	1.69927	1.34641	SIRT2
G2 DNA damage checkpoint (GO:0031572)	1932-01-01	0.452781	0.557146	0	0	1.69927	1.34641	BRCC3
positive regulation of transcription factor import into nucleus (GO:0042993)	1932-01-01	0.452781	0.557146	0	0	1.69927	1.34641	TRIM28
positive regulation of MAPK cascade (GO:0043410)	6/289	0.453215	0.557354	0	0	1.11749	0.884371	NTRK2;ERBB4;DAB2IP;LMTK2;PHB;HRAS
negative regulation of NF-kappaB transcription factor activity (GO:0032088)	1982-02-01	0.453933	0.55791	0	0	1.31718	1.04032	TRAF3;DAB2IP
Fc-gamma receptor signaling pathway (GO:0038094)	3/134	0.457577	0.562059	0	0	1.20668	0.943397	ACTR3;HSP90AA1;HSP90AB1
negative regulation of neuron death (GO:1901215)	30348	0.460156	0.562141	0	0	1.30086	1.00971	NTRK2;VPS35
protein maturation (GO:0051604)	30348	0.460156	0.562141	0	0	1.30086	1.00971	NCSTN;CNTN1
Fc receptor mediated stimulatory signaling pathway (GO:0002431)	3/135	0.462412	0.562141	0	0	1.19748	0.923617	ACTR3;HSP90AA1;HSP90AB1
positive regulation of cell-cell adhesion (GO:0022409)	12055	0.463003	0.562141	0	0	1.64609	1.26752	THY1
positive regulation of cytokine-mediated signaling pathway (GO:0001961)	12055	0.463003	0.562141	0	0	1.64609	1.26752	CPNE1
negative regulation of neurogenesis (GO:0050768)	12055	0.463003	0.562141	0	0	1.64609	1.26752	HOOK3
negative regulation of mitochondrion organization (GO:0010823)	1933-01-01	0.463003	0.562141	0	0	1.64609	1.26752	OPA1
stem cell differentiation (GO:0048863)	1933-01-01	0.463003	0.562141	0	0	1.64609	1.26752	PSMD11
positive regulation of calcium ion transport (GO:0051928)	1933-01-01	0.463003	0.562141	0	0	1.64609	1.26752	GPRIN1
regulation of autophagosome assembly (GO:2000785)	1933-01-01	0.463003	0.562141	0	0	1.64609	1.26752	RAB3GAP1
positive regulation of intrinsic apoptotic signaling pathway (GO:2001244)	1933-01-01	0.463003	0.562141	0	0	1.64609	1.26752	RPS3
cellular response to glucose starvation (GO:0042149)	1933-01-01	0.463003	0.562141	0	0	1.64609	1.26752	ASNS
positive regulation of catalytic activity (GO:0043085)	1933-01-01	0.463003	0.562141	0	0	1.64609	1.26752	NCSTN
exonucleolytic nuclear-transcribed mRNA catabolic process involved in deadenylation-dependent decay (GO:0043928)	1933-01-01	0.463003	0.562141	0	0	1.64609	1.26752	DDX6
regulation of phosphatidylinositol 3-kinase activity (GO:0043551)	1933-01-01	0.463003	0.562141	0	0	1.64609	1.26752	DAB2IP
positive regulation of nucleocytoplasmic transport (GO:0046824)	1933-01-01	0.463003	0.562141	0	0	1.64609	1.26752	KHDRBS1
negative regulation of multi-organism process (GO:0043901)	1933-01-01	0.463003	0.562141	0	0	1.64609	1.26752	SIRT2
positive regulation of locomotion (GO:0040017)	1933-01-01	0.463003	0.562141	0	0	1.64609	1.26752	DDB1
cellular glucose homeostasis (GO:0001678)	1933-01-01	0.463003	0.562141	0	0	1.64609	1.26752	NUCKS1
positive regulation of organelle organization (GO:0010638)	1933-01-01	0.463003	0.562141	0	0	1.64609	1.26752	RAB3GAP1
protein modification process (GO:0036211)	1984-02-01	0.466337	0.565534	0	0	1.28493	0.980202	FBXO2;RPN1
cellular response to molecule of bacterial origin (GO:0071219)	1984-02-01	0.466337	0.565534	0	0	1.28493	0.980202	DAB2IP;SIRT2
plasma membrane bounded cell projection assembly (GO:0120031)	5/241	0.468315	0.567606	0	0	1.11638	0.846897	ACTR3;AHI1;RILPL1;INPP5K;CDH13
muscle contraction (GO:0006936)	3/137	0.472024	0.57036	0	0	1.17949	0.885472	TPM3;TPM1;SORBS1
positive regulation of leukocyte migration (GO:0002687)	12420	0.473034	0.57036	0	0	1.59612	1.19484	THY1
response to amino acid (GO:0043200)	1934-01-01	0.473034	0.57036	0	0	1.59612	1.19484	GPRIN1
positive regulation of DNA binding (GO:0043388)	1934-01-01	0.473034	0.57036	0	0	1.59612	1.19484	SIRT2
positive regulation of cytokinesis (GO:0032467)	1934-01-01	0.473034	0.57036	0	0	1.59612	1.19484	CIT
bone development (GO:0060348)	1934-01-01	0.473034	0.57036	0	0	1.59612	1.19484	GNAS
ventricular cardiac muscle tissue morphogenesis (GO:0055010)	12420	0.473034	0.57036	0	0	1.59612	1.19484	TPM1
negative regulation of endothelial cell migration (GO:0010596)	12420	0.473034	0.57036	0	0	1.59612	1.19484	DAB2IP
regulation of interferon-beta production (GO:0032648)	12420	0.473034	0.57036	0	0	1.59612	1.19484	TRAF3
lipid phosphorylation (GO:0046834)	12785	0.482879	0.577583	0	0	1.5491	1.12773	DGKZ
nuclear-transcribed mRNA catabolic process, exonucleolytic (GO:0000291)	1935-01-01	0.482879	0.577583	0	0	1.5491	1.12773	DDX6
positive regulation of peptide secretion (GO:0002793)	1935-01-01	0.482879	0.577583	0	0	1.5491	1.12773	MYO18A
positive regulation of DNA replication (GO:0045740)	12785	0.482879	0.577583	0	0	1.5491	1.12773	HRAS
endothelial cell migration (GO:0043542)	1935-01-01	0.482879	0.577583	0	0	1.5491	1.12773	CDH13
regulation of mitotic spindle organization (GO:0060236)	1935-01-01	0.482879	0.577583	0	0	1.5491	1.12773	GNAI1
cholesterol biosynthetic process (GO:0006695)	12785	0.482879	0.577583	0	0	1.5491	1.12773	CNBP
regulation of mitochondrial membrane potential (GO:0051881)	1935-01-01	0.482879	0.577583	0	0	1.5491	1.12773	PPA2
positive regulation of ATPase activity (GO:0032781)	12785	0.482879	0.577583	0	0	1.5491	1.12773	TPM1
membrane protein proteolysis (GO:0033619)	1935-01-01	0.482879	0.577583	0	0	1.5491	1.12773	NCSTN
regulation of phosphoprotein phosphatase activity (GO:0043666)	1935-01-01	0.482879	0.577583	0	0	1.5491	1.12773	HSP90AB1
carbohydrate catabolic process (GO:0016052)	1935-01-01	0.482879	0.577583	0	0	1.5491	1.12773	PFKM
DNA-dependent DNA replication maintenance of fidelity (GO:0045005)	1935-01-01	0.482879	0.577583	0	0	1.5491	1.12773	NUCKS1
sulfur compound catabolic process (GO:0044273)	1935-01-01	0.482879	0.577583	0	0	1.5491	1.12773	VCAN
negative regulation of sequence-specific DNA binding transcription factor activity (GO:0043433)	3/140	0.486293	0.581004	0	0	1.15348	0.831595	PRNP;TRAF3;DAB2IP
regulation of cellular component organization (GO:0051128)	3/140	0.486293	0.581004	0	0	1.15348	0.831595	HSP90AA1;DAB2IP;CDH13
double-strand break repair (GO:0006302)	3/141	0.491009	0.583813	0	0	1.14506	0.814477	DDX1;NUCKS1;BRCC3
protein acylation (GO:0043543)	13150	0.49254	0.583813	0	0	1.50476	1.06564	ZDHHC17
regulation of receptor-mediated endocytosis (GO:0048259)	13150	0.49254	0.583813	0	0	1.50476	1.06564	HNRNPK
regulation of nitric-oxide synthase activity (GO:0050999)	13150	0.49254	0.583813	0	0	1.50476	1.06564	HSP90AA1
positive regulation of signaling (GO:0023056)	13150	0.49254	0.583813	0	0	1.50476	1.06564	HOMER1
regulation of response to DNA damage stimulus (GO:2001020)	1936-01-01	0.49254	0.583813	0	0	1.50476	1.06564	FMR1
mRNA catabolic process (GO:0006402)	1936-01-01	0.49254	0.583813	0	0	1.50476	1.06564	DDX5
heart looping (GO:0001947)	1936-01-01	0.49254	0.583813	0	0	1.50476	1.06564	AHI1
plasma membrane organization (GO:0007009)	1936-01-01	0.49254	0.583813	0	0	1.50476	1.06564	EPB41L3
epithelial cell migration (GO:0010631)	1936-01-01	0.49254	0.583813	0	0	1.50476	1.06564	CDH13
acylglycerol metabolic process (GO:0006639)	13150	0.49254	0.583813	0	0	1.50476	1.06564	DGKZ
cardiac muscle contraction (GO:0060048)	1936-01-01	0.49254	0.583813	0	0	1.50476	1.06564	TPM1
cardiac muscle tissue morphogenesis (GO:0055008)	1936-01-01	0.49254	0.583813	0	0	1.50476	1.06564	TPM1
secondary alcohol biosynthetic process (GO:1902653)	1936-01-01	0.49254	0.583813	0	0	1.50476	1.06564	CNBP
peptidyl-threonine modification (GO:0018210)	1989-02-01	0.496599	0.588291	0	0	1.21077	0.847506	LMTK2;DCLK2
protein monoubiquitination (GO:0006513)	1937-01-01	0.502021	0.589975	0	0	1.46289	1.00809	RBX1
base-excision repair (GO:0006284)	1937-01-01	0.502021	0.589975	0	0	1.46289	1.00809	USP47
positive regulation of mitochondrial outer membrane permeabilization involved in apoptotic signaling pathway (GO:1901030)	1937-01-01	0.502021	0.589975	0	0	1.46289	1.00809	YWHAH
positive regulation of receptor activity (GO:2000273)	1937-01-01	0.502021	0.589975	0	0	1.46289	1.00809	SHANK3
positive regulation of smooth muscle cell proliferation (GO:0048661)	1937-01-01	0.502021	0.589975	0	0	1.46289	1.00809	CDH13
phospholipid biosynthetic process (GO:0008654)	13516	0.502021	0.589975	0	0	1.46289	1.00809	CPNE1
positive regulation of axonogenesis (GO:0050772)	1937-01-01	0.502021	0.589975	0	0	1.46289	1.00809	NTRK2
positive regulation of stress fiber assembly (GO:0051496)	1937-01-01	0.502021	0.589975	0	0	1.46289	1.00809	TPM1
negative regulation of G0 to G1 transition (GO:0070317)	1937-01-01	0.502021	0.589975	0	0	1.46289	1.00809	DAB2IP
regulation of metal ion transport (GO:0010959)	1937-01-01	0.502021	0.589975	0	0	1.46289	1.00809	YWHAH
positive regulation of multi-organism process (GO:0043902)	1937-01-01	0.502021	0.589975	0	0	1.46289	1.00809	RAB7A
organic cyclic compound biosynthetic process (GO:1901362)	1937-01-01	0.502021	0.589975	0	0	1.46289	1.00809	GPHN
regulation of cell cycle process (GO:0010564)	1990-02-01	0.502519	0.589975	0	0	1.19695	0.823646	PRMT5;PIN1
regulation of cytokine-mediated signaling pathway (GO:0001959)	1990-02-01	0.502519	0.589975	0	0	1.19695	0.823646	HSP90AB1;MADD
protein tetramerization (GO:0051262)	1990-02-01	0.502519	0.589975	0	0	1.19695	0.823646	GPRIN1;GRIN2B
regulation of JNK cascade (GO:0046328)	1990-02-01	0.502519	0.589975	0	0	1.19695	0.823646	DAB2IP;HRAS
protein-DNA complex assembly (GO:0065004)	1991-02-01	0.508395	0.596539	0	0	1.18344	0.800594	DDB1;RBX1
mitochondrion disassembly (GO:0061726)	1938-01-01	0.511326	0.598639	0	0	1.42328	0.954661	SQSTM1
membrane depolarization during action potential (GO:0086010)	1938-01-01	0.511326	0.598639	0	0	1.42328	0.954661	YWHAH
regulation of ossification (GO:0030278)	1938-01-01	0.511326	0.598639	0	0	1.42328	0.954661	DDX5
chemical homeostasis (GO:0048878)	1938-01-01	0.511326	0.598639	0	0	1.42328	0.954661	NEDD4L
positive regulation of cellular metabolic process (GO:0031325)	1992-02-01	0.514225	0.601697	0	0	1.17023	0.778315	AHI1;FMR1
skeletal muscle tissue development (GO:0007519)	1939-01-01	0.520457	0.606285	0	0	1.38575	0.904963	IGSF8
regulation of extrinsic apoptotic signaling pathway via death domain receptors (GO:1902041)	1939-01-01	0.520457	0.606285	0	0	1.38575	0.904963	MADD
regulation of type I interferon-mediated signaling pathway (GO:0060338)	1939-01-01	0.520457	0.606285	0	0	1.38575	0.904963	HSP90AB1
positive regulation of reactive oxygen species metabolic process (GO:2000379)	1939-01-01	0.520457	0.606285	0	0	1.38575	0.904963	GPRIN1
regulation of G0 to G1 transition (GO:0070316)	1939-01-01	0.520457	0.606285	0	0	1.38575	0.904963	DAB2IP
regulation of plasma membrane bounded cell projection assembly (GO:0120032)	1939-01-01	0.520457	0.606285	0	0	1.38575	0.904963	FMR1
regulation of RNA metabolic process (GO:0051252)	1939-01-01	0.520457	0.606285	0	0	1.38575	0.904963	HNRNPH1
cellular response to amino acid starvation (GO:0034198)	14246	0.520457	0.606285	0	0	1.38575	0.904963	EIF2S1
positive regulation of multicellular organismal process (GO:0051240)	4/202	0.52208	0.607838	0	0	1.0637	0.691335	NLGN1;TFRC;LRP1;INPP5K
positive regulation of programmed cell death (GO:0043068)	5/257	0.524757	0.610616	0	0	1.04463	0.6736	NCSTN;ARHGEF9;DAB2IP;KALRN;SQSTM1
embryonic heart tube morphogenesis (GO:0003143)	14611	0.529418	0.612979	0	0	1.35015	0.858666	AHI1
regulation of cellular localization (GO:0060341)	1940-01-01	0.529418	0.612979	0	0	1.35015	0.858666	FMR1
cognition (GO:0050890)	14611	0.529418	0.612979	0	0	1.35015	0.858666	GNAS
autophagy of mitochondrion (GO:0000422)	1940-01-01	0.529418	0.612979	0	0	1.35015	0.858666	SQSTM1
response to cAMP (GO:0051591)	14611	0.529418	0.612979	0	0	1.35015	0.858666	INPP5K
sterol biosynthetic process (GO:0016126)	1940-01-01	0.529418	0.612979	0	0	1.35015	0.858666	CNBP
regulation of release of cytochrome c from mitochondria (GO:0090199)	1940-01-01	0.529418	0.612979	0	0	1.35015	0.858666	OPA1
regulation of ATPase activity (GO:0043462)	1940-01-01	0.529418	0.612979	0	0	1.35015	0.858666	TPM1
determination of heart left/right asymmetry (GO:0061371)	1940-01-01	0.529418	0.612979	0	0	1.35015	0.858666	AHI1
transcription elongation from RNA polymerase II promoter (GO:0006368)	34731	0.531439	0.61498	0	0	1.13231	0.715808	ELP1;ELP3
regulation of stress-activated MAPK cascade (GO:0032872)	1941-01-01	0.538212	0.621447	0	0	1.31633	0.815471	DAB2IP
positive regulation of viral transcription (GO:0050434)	1941-01-01	0.538212	0.621447	0	0	1.31633	0.815471	NUCKS1
regulation of protein localization (GO:0032880)	1941-01-01	0.538212	0.621447	0	0	1.31633	0.815471	RABGAP1L
gluconeogenesis (GO:0006094)	1941-01-01	0.538212	0.621447	0	0	1.31633	0.815471	SLC25A12
protein localization to organelle (GO:0033365)	35462	0.542682	0.626263	0	0	1.10836	0.677463	TUB;DDX1
regulation of protein modification process (GO:0031399)	15342	0.546842	0.629678	0	0	1.28416	0.775113	CORO1C
negative regulation of protein secretion (GO:0050709)	1942-01-01	0.546842	0.629678	0	0	1.28416	0.775113	RAB11FIP5
glycolipid biosynthetic process (GO:0009247)	1942-01-01	0.546842	0.629678	0	0	1.28416	0.775113	DPM1
translesion synthesis (GO:0019985)	1942-01-01	0.546842	0.629678	0	0	1.28416	0.775113	USP10
histone modification (GO:0016570)	35827	0.548233	0.630242	0	0	1.09675	0.65921	PHB;SIRT2
positive regulation of cell growth (GO:0030307)	35827	0.548233	0.630242	0	0	1.09675	0.65921	USP47;NEDD4L
response to molecule of bacterial origin (GO:0002237)	35827	0.548233	0.630242	0	0	1.09675	0.65921	SIRT2;HNRNPA0
regulation of B cell proliferation (GO:0030888)	1943-01-01	0.555311	0.636288	0	0	1.25352	0.737354	TFRC
cardiac ventricle morphogenesis (GO:0003208)	1943-01-01	0.555311	0.636288	0	0	1.25352	0.737354	TPM1
membrane depolarization (GO:0051899)	1943-01-01	0.555311	0.636288	0	0	1.25352	0.737354	YWHAH
negative regulation of DNA metabolic process (GO:0051053)	15707	0.555311	0.636288	0	0	1.25352	0.737354	RPS3
histone H3 acetylation (GO:0043966)	1943-01-01	0.555311	0.636288	0	0	1.25352	0.737354	ELP3
regulation of interferon-gamma production (GO:0032649)	15707	0.555311	0.636288	0	0	1.25352	0.737354	PRNP
sprouting angiogenesis (GO:0002040)	16072	0.563622	0.641258	0	0	1.22431	0.701982	CDH13
cholesterol transport (GO:0030301)	1944-01-01	0.563622	0.641258	0	0	1.22431	0.701982	STX12
adherens junction organization (GO:0034332)	1944-01-01	0.563622	0.641258	0	0	1.22431	0.701982	CDH13
amide biosynthetic process (GO:0043604)	16072	0.563622	0.641258	0	0	1.22431	0.701982	ASNS
hexose biosynthetic process (GO:0019319)	1944-01-01	0.563622	0.641258	0	0	1.22431	0.701982	SLC25A12
unsaturated fatty acid metabolic process (GO:0033559)	1944-01-01	0.563622	0.641258	0	0	1.22431	0.701982	ACSL1
regulation of T cell activation (GO:0050863)	1944-01-01	0.563622	0.641258	0	0	1.22431	0.701982	THY1
regulation of smooth muscle cell proliferation (GO:0048660)	1944-01-01	0.563622	0.641258	0	0	1.22431	0.701982	CDH13
heart contraction (GO:0060047)	1944-01-01	0.563622	0.641258	0	0	1.22431	0.701982	TPM1
microtubule cytoskeleton organization involved in mitosis (GO:1902850)	1944-01-01	0.563622	0.641258	0	0	1.22431	0.701982	MAP4
carboxylic acid biosynthetic process (GO:0046394)	16072	0.563622	0.641258	0	0	1.22431	0.701982	ASNS
inorganic anion transport (GO:0015698)	1944-01-01	0.563622	0.641258	0	0	1.22431	0.701982	TTYH3
positive regulation of actin filament bundle assembly (GO:0032233)	1944-01-01	0.563622	0.641258	0	0	1.22431	0.701982	TPM1
protein processing (GO:0016485)	2/101	0.564601	0.641676	0	0	1.06336	0.607852	NCSTN;CNTN1
metal ion transport (GO:0030001)	2/101	0.564601	0.641676	0	0	1.06336	0.607852	KCNJ6;NEDD4L
regulation of gene expression (GO:0010468)	19/1037	0.56551	0.642361	0	0	0.981128	0.559269	EIF4A2;EIF4A1;PRMT5;NTRK2;SORT1;CNBP;PHB;HNRNPH1;CAMK2N1;FUBP1;CPNE1;HNRNPD;RPS3;ZNF207;UBAP2L;VPS35;MATR3;TARDBP;HRAS
nicotinamide nucleotide metabolic process (GO:0046496)	1945-01-01	0.571779	0.64913	0	0	1.19642	0.668803	PFKM
negative regulation of protein modification by small protein conjugation or removal (GO:1903321)	16803	0.579783	0.656795	0	0	1.16977	0.637645	RPS3
positive regulation of ion transport (GO:0043270)	1946-01-01	0.579783	0.656795	0	0	1.16977	0.637645	AHCYL1
regulation of fibroblast proliferation (GO:0048145)	1946-01-01	0.579783	0.656795	0	0	1.16977	0.637645	DAB2IP
mitotic spindle assembly (GO:0090307)	1946-01-01	0.579783	0.656795	0	0	1.16977	0.637645	ZNF207
regulation of cellular response to stress (GO:0080135)	2/104	0.58054	0.656943	0	0	1.03192	0.561155	HSP90AA1;HSP90AB1
monovalent inorganic cation transport (GO:0015672)	2/104	0.58054	0.656943	0	0	1.03192	0.561155	KCNJ6;NEDD4L
myofibril assembly (GO:0030239)	1947-01-01	0.587638	0.663544	0	0	1.14428	0.608352	TPM1
postreplication repair (GO:0006301)	1947-01-01	0.587638	0.663544	0	0	1.14428	0.608352	USP10
positive regulation of organelle assembly (GO:1902117)	17168	0.587638	0.663544	0	0	1.14428	0.608352	RAB3GAP1
histone H4 acetylation (GO:0043967)	17168	0.587638	0.663544	0	0	1.14428	0.608352	ELP3
negative regulation of mitotic cell cycle (GO:0045930)	17533	0.595347	0.669366	0	0	1.11988	0.580783	CDKN1B
cytoplasmic microtubule organization (GO:0031122)	1948-01-01	0.595347	0.669366	0	0	1.11988	0.580783	HOOK3
protein K48-linked ubiquitination (GO:0070936)	1948-01-01	0.595347	0.669366	0	0	1.11988	0.580783	NEDD4L
glycoprotein metabolic process (GO:0009100)	17533	0.595347	0.669366	0	0	1.11988	0.580783	FBXO2
interstrand cross-link repair (GO:0036297)	17533	0.595347	0.669366	0	0	1.11988	0.580783	NUCKS1
intrinsic apoptotic signaling pathway in response to DNA damage (GO:0008630)	1948-01-01	0.595347	0.669366	0	0	1.11988	0.580783	BAG6
pattern recognition receptor signaling pathway (GO:0002221)	1948-01-01	0.595347	0.669366	0	0	1.11988	0.580783	TRAF3
cellular response to mechanical stimulus (GO:0071260)	17533	0.595347	0.669366	0	0	1.11988	0.580783	HABP4
regulation of response to external stimulus (GO:0032101)	2/107	0.596047	0.669436	0	0	1.00228	0.518618	PSMA6;TRAF3
cellular response to starvation (GO:0009267)	2/107	0.596047	0.669436	0	0	1.00228	0.518618	ASNS;EIF2S1
nucleotide-excision repair (GO:0006289)	2/108	0.60112	0.674051	0	0	0.992778	0.505286	DDB1;RBX1
DNA-templated transcription, elongation (GO:0006354)	2/108	0.60112	0.674051	0	0	0.992778	0.505286	ELP1;ELP3
monocarboxylic acid metabolic process (GO:0032787)	2/108	0.60112	0.674051	0	0	0.992778	0.505286	PDZD11;HAGH
non-recombinational repair (GO:0000726)	17899	0.602912	0.674618	0	0	1.09649	0.554809	BRCC3
organic hydroxy compound biosynthetic process (GO:1901617)	17899	0.602912	0.674618	0	0	1.09649	0.554809	PDXK
regulation of reactive oxygen species metabolic process (GO:2000377)	17899	0.602912	0.674618	0	0	1.09649	0.554809	SIRT2
regulation of release of sequestered calcium ion into cytosol (GO:0051279)	1949-01-01	0.602912	0.674618	0	0	1.09649	0.554809	THY1
circulatory system development (GO:0072359)	2/109	0.606144	0.677152	0	0	0.98345	0.492351	ERBB4;CACYBP
regulation of cell motility (GO:2000145)	2/109	0.606144	0.677152	0	0	0.98345	0.492351	ERBB4;PIN1
positive regulation of cysteine-type endopeptidase activity involved in apoptotic process (GO:0043280)	2/109	0.606144	0.677152	0	0	0.98345	0.492351	CNTN1;RPS3
blood circulation (GO:0008015)	18264	0.610335	0.680023	0	0	1.07406	0.530314	GCLC
wound healing (GO:0042060)	1950-01-01	0.610335	0.680023	0	0	1.07406	0.530314	TPM1
negative regulation of protein ubiquitination (GO:0031397)	18264	0.610335	0.680023	0	0	1.07406	0.530314	RPS3
neurogenesis (GO:0022008)	18264	0.610335	0.680023	0	0	1.07406	0.530314	CIT
double-strand break repair via nonhomologous end joining (GO:0006303)	1950-01-01	0.610335	0.680023	0	0	1.07406	0.530314	BRCC3
positive regulation of establishment of protein localization to mitochondrion (GO:1903749)	2/110	0.611121	0.680537	0	0	0.974294	0.479801	PSMB7;YWHAH
ncRNA processing (GO:0034470)	4/227	0.614192	0.683594	0	0	0.943235	0.459778	HNRNPA2B1;RPS3;RPS3A;RPL26
peptidyl-tyrosine modification (GO:0018212)	1951-01-01	0.617621	0.685592	0	0	1.05253	0.507192	ERBB4
regulation of exocytosis (GO:0017157)	1951-01-01	0.617621	0.685592	0	0	1.05253	0.507192	STXBP5
arachidonic acid metabolic process (GO:0019369)	1951-01-01	0.617621	0.685592	0	0	1.05253	0.507192	PTGES2
coenzyme metabolic process (GO:0006732)	18629	0.617621	0.685592	0	0	1.05253	0.507192	PDZD11
positive regulation of developmental growth (GO:0048639)	1951-01-01	0.617621	0.685592	0	0	1.05253	0.507192	NEDD4L
extracellular matrix organization (GO:0030198)	4/229	0.621071	0.689058	0	0	0.934755	0.445232	VCAN;CAPNS1;ITGA3;TNR
positive regulation of cell-substrate adhesion (GO:0010811)	18994	0.62477	0.692429	0	0	1.03184	0.485346	CDH13
positive regulation of mitotic cell cycle (GO:0045931)	1952-01-01	0.62477	0.692429	0	0	1.03184	0.485346	ASNS
positive regulation of phosphatidylinositol 3-kinase signaling (GO:0014068)	19360	0.631787	0.699097	0	0	1.01194	0.464687	NTRK2
negative regulation of cellular response to transforming growth factor beta stimulus (GO:1903845)	19360	0.631787	0.699097	0	0	1.01194	0.464687	PIN1
positive regulation of tyrosine phosphorylation of STAT protein (GO:0042531)	1953-01-01	0.631787	0.699097	0	0	1.01194	0.464687	ERBB4
peptidyl-lysine modification (GO:0018205)	2/115	0.635285	0.701858	0	0	0.930945	0.422352	TRIM28;SIRT2
negative regulation of cell growth (GO:0030308)	2/115	0.635285	0.701858	0	0	0.930945	0.422352	CDKN1B;PHB
cellular response to oxidative stress (GO:0034599)	2/115	0.635285	0.701858	0	0	0.930945	0.422352	TPM1;SIRT2
sensory perception (GO:0007600)	1954-01-01	0.638672	0.704858	0	0	0.992798	0.445135	GNAS
cell morphogenesis involved in differentiation (GO:0000904)	1954-01-01	0.638672	0.704858	0	0	0.992798	0.445135	RILPL1
activation of MAPK activity (GO:0000187)	2/117	0.644617	0.70933	0	0	0.914661	0.401627	MADD;DAB2IP
negative regulation of transforming growth factor beta receptor signaling pathway (GO:0030512)	1955-01-01	0.645429	0.70933	0	0	0.974363	0.426615	PIN1
long-chain fatty acid metabolic process (GO:0001676)	1955-01-01	0.645429	0.70933	0	0	0.974363	0.426615	ACSL1
regulation of gene silencing by RNA (GO:0060966)	20090	0.645429	0.70933	0	0	0.974363	0.426615	FMR1
regulation of posttranscriptional gene silencing (GO:0060147)	1955-01-01	0.645429	0.70933	0	0	0.974363	0.426615	FMR1
fat cell differentiation (GO:0045444)	1955-01-01	0.645429	0.70933	0	0	0.974363	0.426615	OSBPL8
DNA recombination (GO:0006310)	1955-01-01	0.645429	0.70933	0	0	0.974363	0.426615	NUCKS1
Notch signaling pathway (GO:0007219)	20090	0.645429	0.70933	0	0	0.974363	0.426615	NCSTN
calcium ion transport (GO:0006816)	2/118	0.649211	0.71274	0	0	0.906729	0.391704	SLC24A3;ITPR1
positive regulation of protein serine/threonine kinase activity (GO:0071902)	2/118	0.649211	0.71274	0	0	0.906729	0.391704	DAB2IP;HRAS
DNA-dependent DNA replication (GO:0006261)	1956-01-01	0.65206	0.714372	0	0	0.956598	0.409059	PURA
regulation of BMP signaling pathway (GO:0030510)	20455	0.65206	0.714372	0	0	0.956598	0.409059	ITGA3
organonitrogen compound catabolic process (GO:1901565)	20455	0.65206	0.714372	0	0	0.956598	0.409059	LNPEP
glycosaminoglycan catabolic process (GO:0006027)	20455	0.65206	0.714372	0	0	0.956598	0.409059	VCAN
negative regulation of transcription, DNA-templated (GO:0045892)	14/813	0.658255	0.719997	0	0	0.918948	0.38427	KHDRBS1;USP47;DDX5;CDKN1B;CNBP;DAB2IP;NEDD4L;PHB;SIRT2;ILF3;GCLC;CHCHD3;TRIM28;INPP5K
negative regulation of growth (GO:0045926)	2/120	0.65826	0.719997	0	0	0.89127	0.37269	CDKN1B;PHB
epidermal growth factor receptor signaling pathway (GO:0007173)	1957-01-01	0.658567	0.719997	0	0	0.939468	0.392405	HRAS
I-kappaB kinase/NF-kappaB signaling (GO:0007249)	20821	0.658567	0.719997	0	0	0.939468	0.392405	DAB2IP
organonitrogen compound biosynthetic process (GO:1901566)	3/181	0.659273	0.720393	0	0	0.885925	0.369092	VAPB;ASNS;GPHN
response to light stimulus (GO:0009416)	21186	0.664953	0.725089	0	0	0.922939	0.376595	CIRBP
integrin-mediated signaling pathway (GO:0007229)	21186	0.664953	0.725089	0	0	0.922939	0.376595	THY1
positive regulation of cell morphogenesis involved in differentiation (GO:0010770)	21186	0.664953	0.725089	0	0	0.922939	0.376595	NTRK2
sodium ion transport (GO:0006814)	21186	0.664953	0.725089	0	0	0.922939	0.376595	NEDD4L
renal system development (GO:0072001)	21551	0.67122	0.730026	0	0	0.90698	0.361575	BAG6
mitotic cytokinesis (GO:0000281)	21551	0.67122	0.730026	0	0	0.90698	0.361575	CIT
regulation of pathway-restricted SMAD protein phosphorylation (GO:0060393)	21551	0.67122	0.730026	0	0	0.90698	0.361575	PIN1
cell morphogenesis (GO:0000902)	21551	0.67122	0.730026	0	0	0.90698	0.361575	CDH13
dicarboxylic acid metabolic process (GO:0043648)	21551	0.67122	0.730026	0	0	0.90698	0.361575	GCLC
positive regulation of protein binding (GO:0032092)	21916	0.67737	0.73557	0	0	0.891562	0.347297	LRP1
response to reactive oxygen species (GO:0000302)	21916	0.67737	0.73557	0	0	0.891562	0.347297	TPM1
membrane lipid biosynthetic process (GO:0046467)	1960-01-01	0.67737	0.73557	0	0	0.891562	0.347297	VAPB
positive regulation of cell proliferation (GO:0008284)	7/424	0.680004	0.738049	0	0	0.881066	0.339789	NTRK2;CAPNS1;ERBB4;CNBP;NAMPT;CDH13;HRAS
actin cytoskeleton reorganization (GO:0031532)	22282	0.683405	0.739826	0	0	0.876658	0.333715	CDC42BPA
potassium ion transport (GO:0006813)	1961-01-01	0.683405	0.739826	0	0	0.876658	0.333715	KCNJ6
regulation of tyrosine phosphorylation of STAT protein (GO:0042509)	22282	0.683405	0.739826	0	0	0.876658	0.333715	ERBB4
glycosaminoglycan metabolic process (GO:0030203)	22282	0.683405	0.739826	0	0	0.876658	0.333715	VCAN
striated muscle contraction (GO:0006941)	22282	0.683405	0.739826	0	0	0.876658	0.333715	TPM1
positive regulation of type I interferon production (GO:0032481)	22647	0.689328	0.74317	0	0	0.862242	0.320787	DHX36
diterpenoid metabolic process (GO:0016101)	22647	0.689328	0.74317	0	0	0.862242	0.320787	LRP1
regulation of actin filament-based process (GO:0032970)	22647	0.689328	0.74317	0	0	0.862242	0.320787	LRP1
negative regulation of intrinsic apoptotic signaling pathway (GO:2001243)	22647	0.689328	0.74317	0	0	0.862242	0.320787	OPA1
cellular amide metabolic process (GO:0043603)	22647	0.689328	0.74317	0	0	0.862242	0.320787	PDZD11
stress-activated MAPK cascade (GO:0051403)	22647	0.689328	0.74317	0	0	0.862242	0.320787	SKP1
tRNA processing (GO:0008033)	22647	0.689328	0.74317	0	0	0.862242	0.320787	DDX1
regulation of T cell proliferation (GO:0042129)	22647	0.689328	0.74317	0	0	0.862242	0.320787	TFRC
positive regulation of mitochondrion organization (GO:0010822)	2/128	0.692592	0.745923	0	0	0.834339	0.306464	PSMB7;VPS35
positive regulation of NF-kappaB transcription factor activity (GO:0051092)	2/128	0.692592	0.745923	0	0	0.834339	0.306464	PSMA6;RPS3
kidney development (GO:0001822)	23012	0.69514	0.745986	0	0	0.848292	0.308475	BAG6
vesicle coating (GO:0006901)	23012	0.69514	0.745986	0	0	0.848292	0.308475	GRIA1
COPII vesicle coating (GO:0048208)	23012	0.69514	0.745986	0	0	0.848292	0.308475	GRIA1
carbohydrate homeostasis (GO:0033500)	23012	0.69514	0.745986	0	0	0.848292	0.308475	INPP5K
vesicle targeting, rough ER to cis-Golgi (GO:0048207)	23012	0.69514	0.745986	0	0	0.848292	0.308475	GRIA1
negative regulation of neuron apoptotic process (GO:0043524)	23012	0.69514	0.745986	0	0	0.848292	0.308475	NTRK2
ribosomal large subunit biogenesis (GO:0042273)	23012	0.69514	0.745986	0	0	0.848292	0.308475	RPL26
cilium organization (GO:0044782)	3/192	0.697848	0.74851	0	0	0.833891	0.299995	ACTR3;AHI1;RILPL1
positive regulation of protein polymerization (GO:0032273)	23377	0.700843	0.749806	0	0	0.834784	0.296742	RPS3
positive regulation of JAK-STAT cascade (GO:0046427)	23377	0.700843	0.749806	0	0	0.834784	0.296742	ERBB4
glucose metabolic process (GO:0006006)	23377	0.700843	0.749806	0	0	0.834784	0.296742	SLC25A12
cellular response to decreased oxygen levels (GO:0036294)	23377	0.700843	0.749806	0	0	0.834784	0.296742	SIRT2
positive regulation of cell adhesion (GO:0045785)	23377	0.700843	0.749806	0	0	0.834784	0.296742	TPM1
negative regulation of blood vessel morphogenesis (GO:2000181)	23743	0.70644	0.754255	0	0	0.821699	0.285554	DAB2IP
DNA synthesis involved in DNA repair (GO:0000731)	23743	0.70644	0.754255	0	0	0.821699	0.285554	USP10
negative regulation of apoptotic signaling pathway (GO:2001234)	23743	0.70644	0.754255	0	0	0.821699	0.285554	OPA1
negative regulation of cell adhesion (GO:0007162)	23743	0.70644	0.754255	0	0	0.821699	0.285554	CDH13
purine ribonucleotide metabolic process (GO:0009150)	24108	0.711933	0.758576	0	0	0.809016	0.27488	OPA1
JNK cascade (GO:0007254)	24108	0.711933	0.758576	0	0	0.809016	0.27488	DAB2IP
sphingolipid biosynthetic process (GO:0030148)	24108	0.711933	0.758576	0	0	0.809016	0.27488	VAPB
positive regulation of cellular protein localization (GO:1903829)	24108	0.711933	0.758576	0	0	0.809016	0.27488	HSP90AB1
positive regulation of cytosolic calcium ion concentration (GO:0007204)	2/133	0.712574	0.758874	0	0	0.802288	0.271872	GPRIN1;GRM1
regulation of cyclin-dependent protein serine/threonine kinase activity (GO:0000079)	24473	0.717323	0.763028	0	0	0.796717	0.264692	CDKN1B
positive regulation of autophagy (GO:0010508)	24473	0.717323	0.763028	0	0	0.796717	0.264692	PAFAH1B2
positive regulation of transcription from RNA polymerase II promoter (GO:0045944)	14/848	0.717566	0.763028	0	0	0.878747	0.291647	DDX17;CNBP;DAB2IP;SIRT2;AHI1;HNRNPK;GPRIN1;NAMPT;DHX36;PIN1;CDH13;HRAS;SQSTM1;PFKM
regulation of epithelial to mesenchymal transition (GO:0010717)	24838	0.722613	0.766452	0	0	0.784786	0.254962	DAB2IP
protein sumoylation (GO:0016925)	24838	0.722613	0.766452	0	0	0.784786	0.254962	TRIM28
response to interferon-gamma (GO:0034341)	24838	0.722613	0.766452	0	0	0.784786	0.254962	SYNCRIP
regulation of endopeptidase activity (GO:0052548)	24838	0.722613	0.766452	0	0	0.784786	0.254962	PSMA3
cholesterol metabolic process (GO:0008203)	24838	0.722613	0.766452	0	0	0.784786	0.254962	CNBP
rRNA metabolic process (GO:0016072)	3/200	0.723767	0.767288	0	0	0.799698	0.258531	RPS3;RPS3A;RPL26
regulation of cell growth (GO:0001558)	3/201	0.726882	0.769623	0	0	0.795618	0.253795	USP47;CDKN1B;PHB
regulation of endothelial cell migration (GO:0010594)	25204	0.727804	0.769623	0	0	0.773205	0.245666	DAB2IP
regulation of innate immune response (GO:0045088)	25204	0.727804	0.769623	0	0	0.773205	0.245666	HSP90AB1
negative regulation of angiogenesis (GO:0016525)	25204	0.727804	0.769623	0	0	0.773205	0.245666	DAB2IP
regulation of osteoblast differentiation (GO:0045667)	25204	0.727804	0.769623	0	0	0.773205	0.245666	DDX5
rRNA processing (GO:0006364)	3/202	0.729969	0.771524	0	0	0.79158	0.249152	RPS3;RPS3A;RPL26
regulation of signal transduction by p53 class mediator (GO:1901796)	2/138	0.731459	0.77232	0	0	0.772594	0.241601	PRMT5;PIN1
response to cytokine (GO:0034097)	2/138	0.731459	0.77232	0	0	0.772594	0.241601	KHSRP;PTPN5
cytoskeleton-dependent cytokinesis (GO:0061640)	25569	0.732898	0.772673	0	0	0.76196	0.236778	CIT
phospholipid metabolic process (GO:0006644)	25569	0.732898	0.772673	0	0	0.76196	0.236778	PGP
calcium-mediated signaling (GO:0019722)	25569	0.732898	0.772673	0	0	0.76196	0.236778	PRNP
recombinational repair (GO:0000725)	25934	0.737897	0.776383	0	0	0.751037	0.228279	NUCKS1
positive regulation of lymphocyte proliferation (GO:0050671)	25934	0.737897	0.776383	0	0	0.751037	0.228279	TFRC
histone acetylation (GO:0016573)	25934	0.737897	0.776383	0	0	0.751037	0.228279	ELP3
positive regulation of growth (GO:0045927)	25934	0.737897	0.776383	0	0	0.751037	0.228279	USP47
cell-cell junction organization (GO:0045216)	26299	0.742802	0.77998	0	0	0.740421	0.220146	CDH13
lipid biosynthetic process (GO:0008610)	26299	0.742802	0.77998	0	0	0.740421	0.220146	ACSL1
negative regulation of cysteine-type endopeptidase activity (GO:2000117)	26299	0.742802	0.77998	0	0	0.740421	0.220146	USP47
regulation of fat cell differentiation (GO:0045598)	26299	0.742802	0.77998	0	0	0.740421	0.220146	SIRT2
regulation of peptide hormone secretion (GO:0090276)	26665	0.747616	0.78425	0	0	0.7301	0.212361	ITPR1
[truncated: 99 more rows]

## Sheet: VM_373_GO_MF
Term	Overlap	P-value	Adjusted P-value	Old P-value	Old Adjusted P-value	Odds Ratio	Combined Score	Genes
RNA binding (GO:0003723)	91/1387	6.30392e-27	2.8935e-24	0	0	4.56429	275.357	EIF4A2;EIF4A1;DAZAP1;HSP90AB1;TFRC;FMR1;CELF2;HDLBP;ELAVL4;CELF4;NUCKS1;MSI2;ELAVL1;EFTUD2;SYNCRIP;TUBA1B;TRIM28;KHSRP;ZNF207;MYO18A;WDR6;UBAP2L;SEC61B;DDX17;HSP90AA1;RBFOX3;ZFR;CIRBP;RPS3A;ACTN4;SND1;PTBP2;EEF1A1;ATXN2L;PSMA6;ILF3;PSMA1;EWSR1;HNRNPH1;CANX;EEF1A2;SRSF2;SRSF3;HNRNPH2;MATR3;ETF1;RPL26;SNRPB;DDX6;KHDRBS1;DDX5;ANP32A;LRP1;USP10;DDX1;RPN1;SRSF1;FXR1;PURA;ATXN2;HNRNPDL;DHX36;FAM120A;RP…
glutamate receptor binding (GO:0035254)	44459	3.47418e-11	7.97325e-09	0	0	44.0919	1061.87	HOMER1;DLG3;HOMER2;GNAS;AKAP5;SQSTM1;SHANK3;SHANK2;SHANK1
mRNA binding (GO:0003729)	18/179	7.39858e-09	1.13198e-06	0	0	6.13049	114.775	EIF4A1;DDX5;RBFOX3;FMR1;SRSF1;CIRBP;ELAVL4;RPS3A;ELAVL1;FXR1;SERBP1;HNRNPA2B1;G3BP2;RPS3;ETF1;RPL26;TARDBP;ZC3H15
proteasome-activating ATPase activity (GO:0036402)	44322	1.29805e-08	1.48951e-06	0	0	266.658	4842.45	PSMC5;PSMC6;PSMC4;PSMC1;PSMC2
translation factor activity, RNA binding (GO:0008135)	24777	4.13638e-08	3.7972e-06	0	0	10.6196	180.543	EEF1A1;EEF1G;EIF4A1;EIF3L;EIF3I;EEF1A2;EIF3G;ETF1;EIF3E;EIF3C;EIF2S1
ionotropic glutamate receptor binding (GO:0035255)	44360	6.21068e-08	4.75117e-06	0	0	45.8233	760.41	DLG3;GNAS;SQSTM1;SHANK3;SHANK2;SHANK1
double-stranded RNA binding (GO:0003725)	21824	1.25789e-07	8.24817e-06	0	0	11.0069	174.885	FXR1;EIF4A1;TUBA1B;ILF3;HSP90AB1;TFRC;FMR1;DHX36;TUBB4B;ELAVL1
mRNA 3'-UTR binding (GO:0003730)	23285	2.39484e-07	1.37404e-05	0	0	10.1741	155.102	FXR1;DDX5;FMR1;KHSRP;SERBP1;HNRNPA2B1;ELAVL4;CIRBP;TARDBP;ELAVL1
purine ribonucleoside triphosphate binding (GO:0035639)	23/396	1.70936e-06	6.99367e-05	0	0	3.39213	45.0454	PRPS1;HSP90AA1;PDXK;HSP90AB1;GSS;LMTK2;TUBB4B;CDC42BPA;TUBB4A;GNAI1;RAB11B;EEF1A1;PSMA6;TUBA1B;RAP2B;TUBB3;TUBB1;ANXA6;MYO18A;HRAS;PFKM;ARL8A;RAB7A
GABA receptor activity (GO:0016917)	44368	1.73072e-06	6.99367e-05	0	0	21.3755	283.588	GABRB3;GABRB2;GABRA1;GABRB1;GABBR1;GABRA3
purine ribonucleoside binding (GO:0032550)	14/159	1.76051e-06	6.99367e-05	0	0	5.23961	69.4244	TUBB4B;TUBB4A;GNAI1;RAB11B;EEF1A1;TUBA1B;RAP2B;TUBB3;TUBB1;ANXA6;RAB18;HRAS;ARL8A;RAB7A
cadherin binding (GO:0045296)	20/313	1.94112e-06	6.99367e-05	0	0	3.7386	49.171	DDX6;HSP90AB1;DAB2IP;HDLBP;EEF2;SND1;RAB11B;PPP1CA;ATXN2L;EEF1G;HNRNPK;VAPB;CAPZA1;SERBP1;CDH13;EIF3E;PAK2;DBN1;ZC3H15;TMPO
transmitter-gated ion channel activity (GO:0022824)	12236	2.08634e-06	6.99367e-05	0	0	14.4186	188.596	GABRB3;GRIA1;GABRA1;GABRB1;GABRA3;GRIA3;GRIN2D
peptidase activity, acting on L-amino acid peptides (GO:0070011)	15/185	2.13315e-06	6.99367e-05	0	0	4.79551	62.6194	LNPEP;BRCC3;PSMA7;PSMA5;PSMA6;PSMB7;NCSTN;PSMA3;PSMB5;CAPNS1;PSMA1;PSMA2;PSMB3;CPNE1;TPP2
guanyl ribonucleotide binding (GO:0032561)	14/170	3.88278e-06	0.000112621	0	0	4.8674	60.6428	TUBB4B;TUBB4A;GNAI1;RAB11B;EEF1A1;TUBA1B;RAP2B;TUBB3;TUBB1;ANXA6;RAB18;HRAS;ARL8A;RAB7A
GTP binding (GO:0005525)	13/147	3.9258e-06	0.000112621	0	0	5.25309	65.3901	TUBB4B;TUBB4A;GNAI1;RAB11B;EEF1A1;TUBA1B;RAP2B;TUBB3;TUBB1;ANXA6;HRAS;ARL8A;RAB7A
nucleoside-triphosphatase activity (GO:0017111)	23/424	5.34274e-06	0.000144254	0	0	3.15068	38.2485	EIF4A2;EIF4A1;DDX6;HSP90AA1;ATL2;GNAI1;RAB11B;EEF1A1;PSMC5;PSMC6;OPA1;PSMC4;PSMC1;GNAQ;GNA11;PSMC2;EEF1A2;GNAS;RAB18;PIN1;HRAS;ARL8A;RAB7A
tubulin binding (GO:0015631)	17/255	6.54857e-06	0.000166988	0	0	3.89025	46.435	PRNP;RABGAP1;FMR1;HOOK3;NCALD;OPA1;MAP2;VAPB;MAP1A;RPS3;ZNF207;NEFM;MAP4;NEFH;ARL8A;HDGFL3;RAB11FIP5
ionotropic glutamate receptor activity (GO:0004970)	44332	8.10007e-06	0.000195681	0	0	24.2292	284.055	GRIA1;GPRIN1;GRIN2B;GRIA3;GRIN2D
GABA-A receptor activity (GO:0004890)	44335	2.0591e-05	0.000472564	0	0	19.0344	205.393	GABRB3;GABRB2;GABRA1;GABRB1;GABRA3
ligand-gated calcium channel activity (GO:0099604)	44336	2.70361e-05	0.000590932	0	0	17.7645	186.853	RASA3;GPRIN1;ITPR1;GRIN2B;GRIN2D
TBP-class protein binding (GO:0017025)	44337	3.49441e-05	0.000697497	0	0	16.6534	170.893	PSMC5;PSMC6;PSMC4;PSMC1;PSMC2
helicase activity (GO:0004386)	12571	3.49508e-05	0.000697497	0	0	11.4436	117.429	EIF4A2;DDX17;DDX6;EIF4A1;DDX5;DDX1
ligand-gated ion channel activity (GO:0015276)	25051	3.78268e-05	0.000723438	0	0	7.14776	72.782	GABRB3;GABRB2;GABRA1;GABRB1;DLG3;GABRA3;ANXA6;NCALD
extracellular ligand-gated ion channel activity (GO:0005230)	19176	4.81943e-05	0.000865956	0	0	8.32265	82.7294	GABRB3;GRIA1;GABRB2;GABRA1;GABRB1;GABRA3;GRIA3
translation initiation factor activity (GO:0003743)	13302	4.90519e-05	0.000865956	0	0	10.6796	105.969	EIF3L;EIF3I;EIF3G;EIF3E;EIF3C;EIF2S1
GABA-gated chloride ion channel activity (GO:0022851)	44298	5.23426e-05	0.000889824	0	0	26.584	262.057	GABRB3;GABRA1;GABRB1;GABRA3
ribosome binding (GO:0043022)	14032	6.7373e-05	0.0011029	0	0	10.0111	96.159	BAG6;YTHDF1;YTHDF3;FMR1;ETF1;EIF2S1
SH3 domain binding (GO:0017124)	20271	6.9682e-05	0.0011029	0	0	7.80129	74.6705	CNTNAP1;LANCL1;DAB2IP;AKAP5;SHANK3;SHANK1;REPS1
microtubule binding (GO:0008017)	13/195	7.9545e-05	0.00121704	0	0	3.85813	36.4177	PRNP;FMR1;HOOK3;OPA1;MAP2;VAPB;MAP1A;RPS3;ZNF207;NEFM;MAP4;NEFH;HDGFL3
G-protein coupled glutamate receptor binding (GO:0035256)	44261	0.000123431	0.00182757	0	0	53.0378	477.332	PRNP;HOMER1;HOMER2
poly(U) RNA binding (GO:0008266)	44302	0.000181399	0.00260194	0	0	17.7191	152.646	KHDRBS1;DAZAP1;HNRNPH1;FMR1
N6-methyladenosine-containing RNA binding (GO:1990247)	44262	0.000213015	0.00287571	0	0	39.7764	336.275	YTHDF1;YTHDF3;HNRNPA2B1
NMDA glutamate receptor activity (GO:0004972)	44262	0.000213015	0.00287571	0	0	39.7764	336.275	GPRIN1;GRIN2B;GRIN2D
G-protein beta/gamma-subunit complex binding (GO:0031683)	44303	0.000233738	0.00305952	0	0	16.3552	136.751	GNA11;GNAQ;GNAS;GNAI1
RNA helicase activity (GO:0003724)	24654	0.000246628	0.00305952	0	0	6.2372	51.8164	EIF4A2;DDX17;EIF4A1;DDX6;DDX5;DDX1;DHX36
ATP-dependent RNA helicase activity (GO:0004004)	24654	0.000246628	0.00305952	0	0	6.2372	51.8164	EIF4A2;DDX17;EIF4A1;DDX6;DDX5;DDX1;DHX36
RNA-dependent ATPase activity (GO:0008186)	25020	0.000270589	0.00326843	0	0	6.13464	50.3955	EIF4A2;DDX17;EIF4A1;DDX6;DDX5;DDX1;DHX36
GTPase activity (GO:0003924)	13/222	0.000288029	0.00338988	0	0	3.35505	27.3519	ATL2;GNAI1;RAB11B;EEF1A1;OPA1;GNAQ;GNA11;EEF1A2;GNAS;RAB18;HRAS;ARL8A;RAB7A
ligand-gated anion channel activity (GO:0099095)	44304	0.000296118	0.00339796	0	0	15.1862	123.384	GABRB3;GABRA1;GABRB1;GABRA3
actin binding (GO:0003779)	14/254	0.000316333	0.00354139	0	0	3.15016	25.3863	ACTR3;TPM3;TPM1;HPCA;MICAL3;DSTN;ACTN4;SORBS1;IQGAP2;NCALD;CORO1C;MAP1A;MYO18A;DBN1
GDP binding (GO:0019003)	18780	0.000358513	0.00391804	0	0	7.11426	56.4413	RAP2B;RAB18;HRAS;GNAI1;RAB7A;RAB11B
ATPase activity, coupled (GO:0042623)	34547	0.000374399	0.00399649	0	0	4.98018	39.2946	DDX17;PSMC5;PSMC6;PSMC4;DDX1;PSMC1;DHX36;PSMC2
glutamate receptor activity (GO:0008066)	44306	0.000455232	0.00454243	0	0	13.2866	102.236	GRIA1;GRM1;GRIA3;GRIN2D
poly-pyrimidine tract binding (GO:0008187)	44306	0.000455232	0.00454243	0	0	13.2866	102.236	KHDRBS1;DAZAP1;HNRNPH1;FMR1
poly-purine tract binding (GO:0070717)	44306	0.000455232	0.00454243	0	0	13.2866	102.236	KHDRBS1;DAZAP1;FMR1;DDX1
neurotransmitter receptor activity involved in regulation of postsynaptic membrane potential (GO:0099529)	44307	0.000554124	0.00529881	0	0	12.5044	93.7594	GRIA1;GABRA1;GABRA3;GRIA3
AU-rich element binding (GO:0017091)	44307	0.000554124	0.00529881	0	0	12.5044	93.7594	KHSRP;ELAVL4;ELAVL1;HNRNPA0
ligand-gated cation channel activity (GO:0099094)	22068	0.000865993	0.00811206	0	0	5.92583	41.7867	GRIA1;KCNJ6;GPRIN1;GRIN2B;GRIA3;GRIN2D
chloride channel activity (GO:0005254)	22433	0.000945614	0.00868074	0	0	5.81779	40.5132	GABRB3;GABRB2;GABRA1;GABRB1;TTYH3;GABRA3
ATP-dependent helicase activity (GO:0008026)	31229	0.00105183	0.00932975	0	0	4.79344	32.8697	EIF4A2;DDX17;EIF4A1;DDX6;DDX5;DDX1;DHX36
endopeptidase activity (GO:0004175)	16/354	0.00106781	0.00932975	0	0	2.55767	17.5	USP10;USP11;PSMA7;PSMA5;PSMA6;PSMB7;NCSTN;PSMA3;PSMB5;CAPNS1;PSMA1;PSMA2;PSMB3;CPNE1;CNTN1;TPP2
protein kinase binding (GO:0019901)	20/495	0.00107729	0.00932975	0	0	2.28442	15.6101	NTRK2;HSP90AA1;CDKN1B;DAB2IP;LMTK2;THY1;EEF2;ELAVL1;EEF1A1;PRKAR1B;PRKAR1A;CAMK2N1;ERBB4;EEF1A2;RPS3;PIN1;NEFH;PAK2;SQSTM1;HNRNPA0
guanylate kinase activity (GO:0004385)	44268	0.00160147	0.013365	0	0	15.9057	102.382	MPP2;DLG3;CASK
translation elongation factor activity (GO:0003746)	44268	0.00160147	0.013365	0	0	15.9057	102.382	EEF1A1;EEF1G;EEF1A2
metal ion binding (GO:0046872)	18/442	0.00172938	0.0141747	0	0	2.2964	14.6051	PDXK;SLC24A3;LRP1;GSS;HPCA;KCNIP4;ITPR1;CDC42BPA;TUBB4A;GNAI1;GCLC;OPA1;GPRIN1;NCS1;CPNE1;PGP;CDH13;SLC25A12
GTPase regulator activity (GO:0030695)	13/275	0.00207349	0.0166971	0	0	2.66905	16.4908	RABGAP1L;RABGAP1;DAB2IP;THY1;IQGAP2;KALRN;ARHGAP32;SYNGAP1;RALGAPB;RASA3;GNAQ;STXBP5;RAB3GAP1
pre-mRNA binding (GO:0036002)	44316	0.00222324	0.0175943	0	0	8.17219	49.9222	HNRNPL;DDX5;CELF2;CELF4
ligand-gated channel activity (GO:0022834)	11414	0.00251553	0.0195699	0	0	7.86912	47.0988	GABRB1;DLG3;ANXA6;NCALD
GTPase activator activity (GO:0005096)	12/249	0.00259582	0.0198581	0	0	2.71959	16.192	ARHGAP32;RABGAP1L;SYNGAP1;RABGAP1;RALGAPB;RASA3;GNAQ;DAB2IP;STXBP5;THY1;KALRN;RAB3GAP1
actin filament binding (GO:0051015)	8/127	0.00265583	0.019984	0	0	3.59305	21.3104	ACTR3;TPM3;TPM1;MYO18A;DSTN;ACTN4;IQGAP2;CORO1C
G-protein coupled receptor binding (GO:0001664)	8/133	0.00352772	0.0261165	0	0	3.41953	19.3104	PSMC5;HOMER1;HOMER2;GNAQ;GNA11;GNAS;PHB;GNAI1
chloride transmembrane transporter activity (GO:0015108)	20576	0.00384862	0.0280399	0	0	5.21526	28.9971	GABRB2;GABRA1;TTYH3;SLC12A5;GABRA3
transmitter-gated ion channel activity involved in regulation of postsynaptic membrane potential (GO:1904315)	13241	0.00437761	0.0313957	0	0	6.63787	36.052	GRIA1;GABRA1;GABRA3;GRIA3
G-quadruplex RNA binding (GO:0002151)	44233	0.00495141	0.0344348	0	0	26.4461	140.378	FMR1;DHX36
phosphatidylinositol phosphate phosphatase activity (GO:0052866)	44233	0.00495141	0.0344348	0	0	26.4461	140.378	SACM1L;INPP5K
kinase binding (GO:0019900)	16/418	0.00552518	0.0378516	0	0	2.14334	11.142	CDKN1B;HSP90AB1;DAB2IP;THY1;EEF2;ELAVL1;EEF1A1;DLG3;CAMK2N1;EEF1A2;RPS3;NEFH;PAK2;SQSTM1;PFKM;HNRNPA0
protein tyrosine phosphatase activity (GO:0004725)	22767	0.00595555	0.0396174	0	0	4.66486	23.9001	PTPRE;PTPRZ1;PGP;PTPN5;TIMM50
PDZ domain binding (GO:0030165)	22767	0.00595555	0.0396174	0	0	4.66486	23.9001	GRIA1;NLGN1;PLEKHA1;ATP2B1;CIT
voltage-gated ion channel activity (GO:0005244)	44276	0.006669	0.0430503	0	0	8.83288	44.2553	GPRIN1;GRIN2B;GRIN2D
small ribosomal subunit rRNA binding (GO:0070181)	44234	0.00684678	0.0430503	0	0	21.1558	105.44	CIRBP;RPS3
cAMP-dependent protein kinase regulator activity (GO:0008603)	44234	0.00684678	0.0430503	0	0	21.1558	105.44	PRKAR1B;PRKAR1A
poly(G) binding (GO:0034046)	44234	0.00684678	0.0430503	0	0	21.1558	105.44	DAZAP1;FMR1
protein homodimerization activity (GO:0042803)	22/664	0.00696836	0.0432227	0	0	1.85349	9.20515	PRPS1;NTRK2;HSP90AA1;PDXK;HSP90AB1;TFRC;GSS;FMR1;TPM1;DAB2IP;ASNS;CACYBP;ACTN4;ELAVL1;FXR1;EEA1;ERBB4;VAPB;CPNE1;ANXA6;CDH13;CD200
mitogen-activated protein kinase kinase binding (GO:0031434)	23863	0.0072663	0.0444697	0	0	4.43093	21.8202	NTRK2;ERBB4;DAB2IP;LMTK2;PIN1
protein phosphatase binding (GO:0019903)	33756	0.00751299	0.0448209	0	0	3.71478	18.1695	SNX3;CDKN1B;TRAF3;DAB2IP;AKAP5;ARPP19
phosphatidylinositol-4-phosphate binding (GO:0070273)	44277	0.00761663	0.0448209	0	0	8.36757	40.8122	SNX3;OSBPL8;DAB2IP
mRNA 5'-UTR binding (GO:0048027)	44277	0.00761663	0.0448209	0	0	8.36757	40.8122	FMR1;RPS3A;RPL26
potassium channel regulator activity (GO:0015459)	15797	0.00828342	0.0481277	0	0	5.44451	26.0983	DPP6;KCNIP4;NEDD4L;ARPP19
disordered domain specific binding (GO:0097718)	44278	0.00863972	0.0489584	0	0	7.94878	37.7677	HSP90AA1;HSP90AB1;FKBP8
nucleotide kinase activity (GO:0019201)	44278	0.00863972	0.0489584	0	0	7.94878	37.7677	MPP2;DLG3;CASK
sequence-specific mRNA binding (GO:1990825)	44235	0.00901702	0.0504733	0	0	17.6289	83.0083	FMR1;ETF1
miRNA binding (GO:0035198)	44279	0.00973949	0.0537296	0	0	7.56988	35.0604	FMR1;HNRNPA2B1;MATR3
magnesium ion binding (GO:0000287)	7/127	0.00983287	0.0537296	0	0	3.10904	14.3701	GCLC;PDXK;OPA1;GSS;PGP;CDC42BPA;GNAI1
metal ion transmembrane transporter activity (GO:0046873)	44280	0.010917	0.0589519	0	0	7.22543	32.6404	ITPR1;ATP2B1;ZDHHC17
phosphatidylinositol binding (GO:0035091)	6/100	0.0111064	0.059277	0	0	3.39724	15.2884	EEA1;TUB;SNX27;PLEKHA1;ITPR1;THY1
neurotrophin binding (GO:0043121)	44236	0.0114513	0.0597287	0	0	15.1097	67.5353	NTRK2;SORT1
cAMP-dependent protein kinase inhibitor activity (GO:0004862)	44236	0.0114513	0.0597287	0	0	15.1097	67.5353	PRKAR1B;PRKAR1A
phosphatase binding (GO:0019902)	6/102	0.0121668	0.0620835	0	0	3.32612	14.665	SNX3;CNST;CHCHD3;CDKN1B;DLG3;TRAF3
tumor necrosis factor receptor superfamily binding (GO:0032813)	44281	0.0121732	0.0620835	0	0	6.91093	30.4669	TRAF3;MADD;DAB2IP
amyloid-beta binding (GO:0001540)	17989	0.0130377	0.0657618	0	0	4.71713	20.4719	GRIA1;PRNP;NLGN1;GRIA3
benzodiazepine receptor activity (GO:0008503)	44237	0.014139	0.0697826	0	0	13.2204	56.3031	GABRA1;GABRA3
death receptor binding (GO:0005123)	44237	0.014139	0.0697826	0	0	13.2204	56.3031	MADD;DAB2IP
protein kinase regulator activity (GO:0019887)	6/107	0.0151255	0.0738576	0	0	3.16066	13.2475	CDKN1B;PRKAR1B;PRKAR1A;MADD;ELP1;ELP3
mRNA 3'-UTR AU-rich region binding (GO:0035925)	44238	0.0170699	0.0816153	0	0	11.7508	47.831	KHSRP;ELAVL1
mannose binding (GO:0005537)	44238	0.0170699	0.0816153	0	0	11.7508	47.831	LMAN2L;LMAN2
phosphatidylinositol phosphate binding (GO:1901981)	29707	0.0177365	0.0839082	0	0	3.49524	14.0933	SNX3;OSBPL8;SNX27;DAB2IP;IQGAP2
protein serine/threonine kinase inhibitor activity (GO:0030291)	44285	0.0179988	0.0839082	0	0	5.88589	23.6463	CDKN1B;PRKAR1B;PRKAR1A
calcium ion binding (GO:0005509)	11/284	0.0180979	0.0839082	0	0	2.15423	8.64269	SLC24A3;LRP1;GPRIN1;NCS1;HPCA;KCNIP4;CPNE1;ITPR1;CDH13;SLC25A12;TUBB4A
phosphatidylinositol-3-phosphate binding (GO:0032266)	44286	0.0196577	0.0901691	0	0	5.67539	22.3002	SNX3;SNX27;DAB2IP
potassium ion binding (GO:0030955)	44239	0.020234	0.0901691	0	0	10.5752	41.2474	PDXK;SLC24A3
sodium ion binding (GO:0031402)	44239	0.020234	0.0901691	0	0	10.5752	41.2474	PDXK;SLC24A3
annealing activity (GO:0097617)	44239	0.020234	0.0901691	0	0	10.5752	41.2474	FXR1;FMR1
histone deacetylase binding (GO:0042826)	31168	0.0213932	0.0935407	0	0	3.3198	12.7636	HSP90AA1;HSP90AB1;DHX36;PHB;SIRT2
telomeric DNA binding (GO:0042162)	11749	0.0213982	0.0935407	0	0	5.4794	21.0653	PURA;HNRNPA2B1;HNRNPD
ion channel inhibitor activity (GO:0008200)	12114	0.0232203	0.100393	0	0	5.29649	19.9292	ITPR1;NEDD4L;VTI1B
glycine binding (GO:0016594)	44240	0.0236218	0.100393	0	0	9.61333	36.0076	GPRIN1;GRIN2B
protein kinase A catalytic subunit binding (GO:0034236)	44240	0.0236218	0.100393	0	0	9.61333	36.0076	PRKAR1B;PRKAR1A
acid-amino acid ligase activity (GO:0016881)	44241	0.0272237	0.113597	0	0	8.81177	31.7547	GCLC;GSS
poly(A) binding (GO:0008143)	44241	0.0272237	0.113597	0	0	8.81177	31.7547	KHDRBS1;DDX1
inhibitory extracellular ligand-gated ion channel activity (GO:0005237)	44242	0.0310307	0.123853	0	0	8.13353	28.2459	GABRA1;GABRA3
intracellular ligand-gated ion channel activity (GO:0005217)	44242	0.0310307	0.123853	0	0	8.13353	28.2459	RASA3;ITPR1
transmembrane receptor protein tyrosine phosphatase activity (GO:0005001)	44242	0.0310307	0.123853	0	0	8.13353	28.2459	PTPRE;PTPRZ1
transmembrane receptor protein phosphatase activity (GO:0019198)	44242	0.0310307	0.123853	0	0	8.13353	28.2459	PTPRE;PTPRZ1
insulin-like growth factor receptor binding (GO:0005159)	44242	0.0310307	0.123853	0	0	8.13353	28.2459	GNAS;YWHAH
divalent inorganic cation transmembrane transporter activity (GO:0072509)	13940	0.0335514	0.13276	0	0	4.53869	15.4074	ITPR1;ATP2B1;ZDHHC17
anion channel activity (GO:0005253)	24198	0.0347404	0.134005	0	0	3.42075	11.4932	GABRB2;GABRA1;TTYH3;GABRA3
alkali metal ion binding (GO:0031420)	44243	0.0350339	0.134005	0	0	7.55218	25.3107	PDXK;SLC24A3
DNA polymerase binding (GO:0070182)	44243	0.0350339	0.134005	0	0	7.55218	25.3107	HSP90AA1;HSP90AB1
MHC class II protein complex binding (GO:0023026)	44243	0.0350339	0.134005	0	0	7.55218	25.3107	HSP90AA1;HSP90AB1
amino acid binding (GO:0016597)	14305	0.0358598	0.13603	0	0	4.41239	14.685	GCLC;GPRIN1;GRIN2B
adenyl ribonucleotide binding (GO:0032559)	10/279	0.0372075	0.139986	0	0	1.98245	6.52472	PRPS1;GCLC;HSP90AA1;PDXK;HSP90AB1;GSS;MYO18A;LMTK2;CDC42BPA;PFKM
double-stranded DNA binding (GO:0003690)	36281	0.037906	0.141454	0	0	2.82334	9.23979	PURA;RPS3;NUCKS1;TARDBP;PURG
phosphotransferase activity, phosphate group as acceptor (GO:0016776)	15036	0.040715	0.150711	0	0	4.17973	13.38	MPP2;DLG3;CASK
phosphatase inhibitor activity (GO:0019212)	44245	0.0435948	0.16008	0	0	6.60748	20.7	LMTK2;ARPP19
phosphatase activity (GO:0016791)	5/104	0.0452755	0.164932	0	0	2.68006	8.29476	SACM1L;PGP;INPP5K;TIMM50;PPP1CA
polyubiquitin modification-dependent protein binding (GO:0031593)	15766	0.0458838	0.165832	0	0	3.97034	12.2352	BAG6;BRCC3;SQSTM1
MHC protein complex binding (GO:0023023)	44246	0.0481361	0.171275	0	0	6.21849	18.8652	HSP90AA1;HSP90AB1
dynein complex binding (GO:0070840)	44246	0.0481361	0.171275	0	0	6.21849	18.8652	FMR1;NEFH
ubiquitin-like protein-specific protease activity (GO:0019783)	27120	0.0494947	0.174754	0	0	3.02857	9.10355	USP47;USP10;USP11;BRCC3
ATP binding (GO:0005524)	9/255	0.0504644	0.176818	0	0	1.94797	5.81759	PRPS1;HSP90AA1;PDXK;HSP90AB1;GSS;MYO18A;LMTK2;CDC42BPA;PFKM
intramolecular oxidoreductase activity, transposing S-S bonds (GO:0016864)	44247	0.0528406	0.180999	0	0	5.87272	17.2686	TMX4;TMX3
protein disulfide isomerase activity (GO:0003756)	44247	0.0528406	0.180999	0	0	5.87272	17.2686	TMX4;TMX3
protein phosphatase 2A binding (GO:0051721)	44247	0.0528406	0.180999	0	0	5.87272	17.2686	DAB2IP;ARPP19
GTPase binding (GO:0051020)	27851	0.0536451	0.181052	0	0	2.94414	8.6127	HSP90AA1;RILPL1;VPS41;PAK2
thiol-dependent ubiquitin-specific protease activity (GO:0004843)	27851	0.0536451	0.181052	0	0	2.94414	8.6127	USP47;USP10;USP11;BRCC3
calcium ion transmembrane transporter activity (GO:0015085)	28216	0.055789	0.186913	0	0	2.90366	8.3805	SLC24A3;GPRIN1;ITPR1;ATP2B1
zinc ion binding (GO:0008270)	10/302	0.0577258	0.192001	0	0	1.82413	5.2025	EEA1;VPS29;PDXK;TRIM28;LANCL1;ZNF207;LNPEP;GRIN2B;SHANK3;SIRT2
protein heterodimerization activity (GO:0046982)	9/265	0.0613051	0.202439	0	0	1.87091	5.22338	FXR1;PRMT5;RALGAPB;ITGA3;VAPB;FMR1;TPM1;ALG2;YWHAH
telomerase RNA binding (GO:0070034)	44249	0.0627092	0.205597	0	0	5.28491	14.6352	DHX36;SNRPB
protein phosphatase inhibitor activity (GO:0004864)	44250	0.0678587	0.217812	0	0	5.03299	13.5404	LMTK2;ARPP19
ADP binding (GO:0043531)	44250	0.0678587	0.217812	0	0	5.03299	13.5404	GCLC;MYO18A
calcium-release channel activity (GO:0015278)	44250	0.0678587	0.217812	0	0	5.03299	13.5404	RASA3;ITPR1
SH3/SH2 adaptor activity (GO:0005070)	18688	0.0695654	0.22174	0	0	3.30726	8.81547	KHDRBS1;CNTNAP1;SORBS1
NF-kappaB binding (GO:0051059)	44251	0.0731422	0.229947	0	0	4.80397	12.5641	PSMA6;CPNE1
mannosyltransferase activity (GO:0000030)	44251	0.0731422	0.229947	0	0	4.80397	12.5641	DPM1;ALG2
epidermal growth factor receptor binding (GO:0005154)	44252	0.0785531	0.243621	0	0	4.59487	11.6893	ATXN2;ERBB4
lipoprotein particle receptor binding (GO:0070325)	44252	0.0785531	0.243621	0	0	4.59487	11.6893	LRP1;LANCL1
single-stranded DNA binding (GO:0003697)	31868	0.079697	0.24551	0	0	2.55252	6.45666	PURA;HNRNPK;FUBP1;DHX36
RNA polymerase II core binding (GO:0000993)	44253	0.0840848	0.257299	0	0	4.40319	10.902	ELP1;ELP3
ATPase activity (GO:0016887)	7/203	0.0865971	0.261646	0	0	1.89608	4.63873	EIF4A2;PSMC5;HSP90AA1;PSMC6;PSMC4;PSMC1;PSMC2
phosphoric ester hydrolase activity (GO:0042578)	20515	0.0866454	0.261646	0	0	2.99449	7.32432	SACM1L;PGP;PPP1CA
basal RNA polymerase II transcription machinery binding (GO:0001099)	44254	0.0897309	0.267445	0	0	4.22685	10.1907	ELP1;ELP3
beta-tubulin binding (GO:0048487)	44254	0.0897309	0.267445	0	0	4.22685	10.1907	VAPB;ARL8A
thiol-dependent ubiquitinyl hydrolase activity (GO:0036459)	1992-04-01	0.0932743	0.276212	0	0	2.40687	5.70961	USP47;USP10;USP11;BRCC3
ion channel activity (GO:0005216)	1993-04-01	0.0961136	0.281857	0	0	2.37971	5.57381	GABRB1;DLG3;ANXA6;NCALD
Rab GTPase binding (GO:0017137)	5/130	0.0964087	0.281857	0	0	2.11978	4.95851	RABGAP1L;RABGAP1;STXBP5;RAB3GAP1;RAB11FIP5
Rho guanyl-nucleotide exchange factor activity (GO:0005089)	21610	0.0976606	0.28371	0	0	2.83364	6.59177	FARP1;ARHGEF9;KALRN
excitatory extracellular ligand-gated ion channel activity (GO:0005231)	47150	0.101342	0.285068	0	0	3.91335	8.95866	GRIA1;GRIA3
transmembrane receptor protein tyrosine kinase activity (GO:0004714)	22341	0.105303	0.285068	0	0	2.73565	6.15772	NTRK2;ERBB4;LMTK2
chromo shadow domain binding (GO:0070087)	44202	0.106823	0.285068	0	0	10.5495	23.5947	TRIM28
vascular endothelial growth factor receptor 2 binding (GO:0043184)	44202	0.106823	0.285068	0	0	10.5495	23.5947	DAB2IP
protein phosphatase 2B binding (GO:0030346)	44202	0.106823	0.285068	0	0	10.5495	23.5947	AKAP5
nerve growth factor binding (GO:0048406)	2021-01-06	0.106823	0.285068	0	0	10.5495	23.5947	SORT1
vasopressin receptor activity (GO:0005000)	44202	0.106823	0.285068	0	0	10.5495	23.5947	INPP5K
NEDD8 transferase activity (GO:0019788)	44202	0.106823	0.285068	0	0	10.5495	23.5947	RBX1
NADPH-hemoprotein reductase activity (GO:0003958)	2021-01-06	0.106823	0.285068	0	0	10.5495	23.5947	POR
clathrin heavy chain binding (GO:0032050)	2021-01-06	0.106823	0.285068	0	0	10.5495	23.5947	LRP1
histone methyltransferase binding (GO:1990226)	44202	0.106823	0.285068	0	0	10.5495	23.5947	HSP90AB1
cuprous ion binding (GO:1903136)	44202	0.106823	0.285068	0	0	10.5495	23.5947	PRNP
phosphoserine residue binding (GO:0050815)	2021-01-06	0.106823	0.285068	0	0	10.5495	23.5947	PIN1
sodium channel inhibitor activity (GO:0019871)	44202	0.106823	0.285068	0	0	10.5495	23.5947	NEDD4L
transmembrane receptor protein kinase activity (GO:0019199)	22706	0.109209	0.289752	0	0	2.68914	5.95508	NTRK2;ERBB4;LMTK2
phosphoprotein phosphatase activity (GO:0004721)	5/136	0.111159	0.29323	0	0	2.02207	4.44207	PTPRZ1;PGP;PTPN5;TIMM50;PPP1CA
monocarboxylic acid transmembrane transporter activity (GO:0008028)	11720	0.119468	0.308043	0	0	3.52147	7.48209	MPC1;EMB
phosphatidylinositol 3-kinase regulatory subunit binding (GO:0036312)	44203	0.123486	0.308043	0	0	8.79077	18.387	DAB2IP
primary miRNA binding (GO:0070878)	44203	0.123486	0.308043	0	0	8.79077	18.387	DDX5
G-quadruplex DNA binding (GO:0051880)	44203	0.123486	0.308043	0	0	8.79077	18.387	DHX36
phosphofructokinase activity (GO:0008443)	44203	0.123486	0.308043	0	0	8.79077	18.387	PFKM
Arp2/3 complex binding (GO:0071933)	44203	0.123486	0.308043	0	0	8.79077	18.387	IQGAP2
C4-dicarboxylate transmembrane transporter activity (GO:0015556)	44203	0.123486	0.308043	0	0	8.79077	18.387	SLC25A12
phosphatidylinositol phosphate 4-phosphatase activity (GO:0034596)	44203	0.123486	0.308043	0	0	8.79077	18.387	SACM1L
cardiolipin binding (GO:1901612)	44203	0.123486	0.308043	0	0	8.79077	18.387	OPA1
GPI anchor binding (GO:0034235)	44203	0.123486	0.308043	0	0	8.79077	18.387	THY1
transition metal ion binding (GO:0046914)	11/399	0.128559	0.318964	0	0	1.50673	3.09086	EEA1;VPS29;PRNP;PDXK;TRIM28;LANCL1;ZNF207;LNPEP;GRIN2B;SHANK3;SIRT2
Ras GTPase binding (GO:0017016)	6/184	0.130636	0.32048	0	0	1.78633	3.63579	RABGAP1L;RABGAP1;STXBP5;IQGAP2;RAB3GAP1;RAB11FIP5
aminopeptidase activity (GO:0004177)	12451	0.131962	0.32048	0	0	3.30104	6.6854	TPP2;LNPEP
RNA polymerase core enzyme binding (GO:0043175)	12451	0.131962	0.32048	0	0	3.30104	6.6854	ELP1;ELP3
protein phosphorylated amino acid binding (GO:0045309)	12451	0.131962	0.32048	0	0	3.30104	6.6854	PIN1;PTPN5
oxidized DNA binding (GO:0032356)	44204	0.139838	0.332569	0	0	7.53456	14.8225	RPS3
phosphatidylinositol-4,5-bisphosphate 5-phosphatase activity (GO:0004439)	2021-01-08	0.139838	0.332569	0	0	7.53456	14.8225	INPP5K
NAD+ binding (GO:0070403)	44204	0.139838	0.332569	0	0	7.53456	14.8225	SIRT2
phosphatidylinositol-4,5-bisphosphate phosphatase activity (GO:0106019)	44204	0.139838	0.332569	0	0	7.53456	14.8225	INPP5K
chloride channel inhibitor activity (GO:0019869)	44205	0.155887	0.350139	0	0	6.59241	12.2528	VTI1B
double-stranded telomeric DNA binding (GO:0003691)	44205	0.155887	0.350139	0	0	6.59241	12.2528	PURA
siRNA binding (GO:0035197)	44205	0.155887	0.350139	0	0	6.59241	12.2528	FMR1
histone-arginine N-methyltransferase activity (GO:0008469)	44205	0.155887	0.350139	0	0	6.59241	12.2528	PRMT5
nucleoside-triphosphate diphosphatase activity (GO:0047429)	44205	0.155887	0.350139	0	0	6.59241	12.2528	ITPA
potassium ion symporter activity (GO:0022820)	44205	0.155887	0.350139	0	0	6.59241	12.2528	SLC12A5
potassium:chloride symporter activity (GO:0015379)	44205	0.155887	0.350139	0	0	6.59241	12.2528	SLC12A5
dolichyl-diphosphooligosaccharide-protein glycotransferase activity (GO:0004579)	44205	0.155887	0.350139	0	0	6.59241	12.2528	RPN1
glucocorticoid receptor binding (GO:0035259)	44205	0.155887	0.350139	0	0	6.59241	12.2528	YWHAH
vascular endothelial growth factor receptor binding (GO:0005172)	44205	0.155887	0.350139	0	0	6.59241	12.2528	DAB2IP
cation:chloride symporter activity (GO:0015377)	44205	0.155887	0.350139	0	0	6.59241	12.2528	SLC12A5
peptidyl-prolyl cis-trans isomerase activity (GO:0003755)	13912	0.157755	0.350139	0	0	2.93366	5.41763	FKBP8;PIN1
ubiquitin protein ligase binding (GO:0031625)	8/284	0.162816	0.350139	0	0	1.53671	2.78933	BAG6;TUBA1B;TRIM28;PRKAR1A;TRAF3;SQSTM1;UBE2J1;RBX1
filamin binding (GO:0031005)	44206	0.171637	0.350139	0	0	5.85962	10.3268	DPYSL4
phosphatidylinositol-5-phosphate binding (GO:0010314)	44206	0.171637	0.350139	0	0	5.85962	10.3268	SNX3
phosphatidylglycerol binding (GO:1901611)	44206	0.171637	0.350139	0	0	5.85962	10.3268	OPA1
neurexin family protein binding (GO:0042043)	44206	0.171637	0.350139	0	0	5.85962	10.3268	NLGN1
arginine N-methyltransferase activity (GO:0016273)	2021-01-10	0.171637	0.350139	0	0	5.85962	10.3268	PRMT5
adenylate cyclase binding (GO:0008179)	44206	0.171637	0.350139	0	0	5.85962	10.3268	AKAP5
oligosaccharyl transferase activity (GO:0004576)	44206	0.171637	0.350139	0	0	5.85962	10.3268	RPN1
carbon-nitrogen ligase activity, with glutamine as amido-N-donor (GO:0016884)	44206	0.171637	0.350139	0	0	5.85962	10.3268	ASNS
calcium channel inhibitor activity (GO:0019855)	44206	0.171637	0.350139	0	0	5.85962	10.3268	ITPR1
volume-sensitive anion channel activity (GO:0005225)	2021-01-10	0.171637	0.350139	0	0	5.85962	10.3268	TTYH3
G-protein activated inward rectifier potassium channel activity (GO:0015467)	44206	0.171637	0.350139	0	0	5.85962	10.3268	KCNJ6
long-chain fatty acid-CoA ligase activity (GO:0004467)	44206	0.171637	0.350139	0	0	5.85962	10.3268	ACSL1
diacylglycerol kinase activity (GO:0004143)	2021-01-10	0.171637	0.350139	0	0	5.85962	10.3268	DGKZ
G-rich strand telomeric DNA binding (GO:0098505)	44206	0.171637	0.350139	0	0	5.85962	10.3268	HNRNPA2B1
cyclin-dependent protein serine/threonine kinase inhibitor activity (GO:0004861)	44206	0.171637	0.350139	0	0	5.85962	10.3268	CDKN1B
mitogen-activated protein kinase kinase kinase binding (GO:0031435)	44206	0.171637	0.350139	0	0	5.85962	10.3268	DAB2IP
oxidized purine DNA binding (GO:0032357)	44206	0.171637	0.350139	0	0	5.85962	10.3268	RPS3
inositol trisphosphate phosphatase activity (GO:0046030)	44206	0.171637	0.350139	0	0	5.85962	10.3268	INPP5K
magnesium ion transmembrane transporter activity (GO:0015095)	44206	0.171637	0.350139	0	0	5.85962	10.3268	ZDHHC17
protein methyltransferase activity (GO:0008276)	15008	0.177661	0.356847	0	0	2.70758	4.67837	PRMT5;SETD7
oxidoreductase activity, acting on paired donors, with incorporation or reduction of molecular oxygen, NAD(P)H as one donor, and incorporation of one atom of oxygen (GO:0016709)	15008	0.177661	0.356847	0	0	2.70758	4.67837	POR;MICAL3
pyrophosphatase activity (GO:0016462)	15008	0.177661	0.356847	0	0	2.70758	4.67837	PPA2;ITPA
MAP kinase kinase kinase activity (GO:0004709)	1978-03-01	0.178313	0.356847	0	0	2.11373	3.64453	NTRK2;ERBB4;LMTK2
protease binding (GO:0002020)	4/118	0.178812	0.356847	0	0	1.85547	3.19403	BAG6;PRNP;ITGA3;CNTN1
inositol 1,4,5 trisphosphate binding (GO:0070679)	44207	0.187093	0.358978	0	0	5.27339	8.83898	ITPR1
tumor necrosis factor receptor binding (GO:0005164)	2021-01-11	0.187093	0.358978	0	0	5.27339	8.83898	TRAF3
peptide hormone receptor binding (GO:0051428)	2021-01-11	0.187093	0.358978	0	0	5.27339	8.83898	PSMC5
thioesterase binding (GO:0031996)	2021-01-11	0.187093	0.358978	0	0	5.27339	8.83898	TRAF3
Lys63-specific deubiquitinase activity (GO:0061578)	2021-01-11	0.187093	0.358978	0	0	5.27339	8.83898	BRCC3
neuropeptide receptor binding (GO:0071855)	44207	0.187093	0.358978	0	0	5.27339	8.83898	SHANK1
lipid phosphatase activity (GO:0042577)	44207	0.187093	0.358978	0	0	5.27339	8.83898	INPP5K
3',5'-cyclic-GMP phosphodiesterase activity (GO:0047555)	2021-01-11	0.187093	0.358978	0	0	5.27339	8.83898	PDE1A
protein transporter activity (GO:0008565)	29281	0.187669	0.358978	0	0	2.05862	3.44423	VPS29;LRP1;VPS35
NADH dehydrogenase (ubiquinone) activity (GO:0008137)	15738	0.191137	0.358978	0	0	2.57524	4.26142	NDUFA8;NDUFB10
Rac GTPase binding (GO:0048365)	15738	0.191137	0.358978	0	0	2.57524	4.26142	IQGAP2;PAK2
NADH dehydrogenase (quinone) activity (GO:0050136)	15738	0.191137	0.358978	0	0	2.57524	4.26142	NDUFA8;NDUFB10
rRNA binding (GO:0019843)	15738	0.191137	0.358978	0	0	2.57524	4.26142	RPS3;CIRBP
cholesterol binding (GO:0015485)	15738	0.191137	0.358978	0	0	2.57524	4.26142	OSBPL8;ANXA6
ubiquitin-like protein ligase binding (GO:0044389)	8/297	0.192243	0.358978	0	0	1.4666	2.41842	BAG6;TUBA1B;TRIM28;PRKAR1A;TRAF3;SQSTM1;UBE2J1;RBX1
cysteine-type endopeptidase activity (GO:0004197)	1981-03-01	0.192394	0.358978	0	0	2.03212	3.34937	CAPNS1;USP10;USP11
calcium:cation antiporter activity (GO:0015368)	44208	0.202262	0.368406	0	0	4.79374	7.66131	SLC24A3
single-stranded telomeric DNA binding (GO:0043047)	44208	0.202262	0.368406	0	0	4.79374	7.66131	HNRNPA2B1
protein tyrosine kinase activator activity (GO:0030296)	44208	0.202262	0.368406	0	0	4.79374	7.66131	PAK2
protein-arginine N-methyltransferase activity (GO:0016274)	2021-01-12	0.202262	0.368406	0	0	4.79374	7.66131	PRMT5
DNA-(apurinic or apyrimidinic site) lyase activity (GO:0003906)	2021-01-12	0.202262	0.368406	0	0	4.79374	7.66131	RPS3
symporter activity (GO:0015293)	2021-01-12	0.202262	0.368406	0	0	4.79374	7.66131	SLC12A5
single-stranded RNA binding (GO:0003727)	1945-02-01	0.204742	0.369986	0	0	2.45521	3.89398	FXR1;FMR1
exopeptidase activity (GO:0008238)	16469	0.204742	0.369986	0	0	2.45521	3.89398	TPP2;LNPEP
damaged DNA binding (GO:0003684)	1946-02-01	0.211584	0.376947	0	0	2.39929	3.72641	DDB1;RPS3
myosin binding (GO:0017022)	16834	0.211584	0.376947	0	0	2.39929	3.72641	LMTK2;RAB11B
ubiquitin-ubiquitin ligase activity (GO:0034450)	44209	0.217149	0.376947	0	0	4.39404	6.71045	RBX1
phosphatidylinositol phosphate 5-phosphatase activity (GO:0034595)	44209	0.217149	0.376947	0	0	4.39404	6.71045	INPP5K
GTPase inhibitor activity (GO:0005095)	44209	0.217149	0.376947	0	0	4.39404	6.71045	IQGAP2
low-density lipoprotein receptor activity (GO:0005041)	44209	0.217149	0.376947	0	0	4.39404	6.71045	LRP1
acidic amino acid transmembrane transporter activity (GO:0015172)	44209	0.217149	0.376947	0	0	4.39404	6.71045	SLC25A12
oxidoreductase activity, acting on NAD(P)H, heme protein as acceptor (GO:0016653)	44209	0.217149	0.376947	0	0	4.39404	6.71045	POR
RNA stem-loop binding (GO:0035613)	44209	0.217149	0.376947	0	0	4.39404	6.71045	FMR1
thiolester hydrolase activity (GO:0016790)	44209	0.217149	0.376947	0	0	4.39404	6.71045	HAGH
calcium-dependent phospholipid binding (GO:0005544)	17199	0.218449	0.376947	0	0	2.34585	3.56852	ANXA6;CPNE1
protein phosphatase regulator activity (GO:0019888)	17199	0.218449	0.376947	0	0	2.34585	3.56852	LMTK2;ARPP19
flavin adenine dinucleotide binding (GO:0050660)	17564	0.225332	0.379919	0	0	2.29474	3.41958	POR;MICAL3
histone methyltransferase activity (GO:0042054)	17564	0.225332	0.379919	0	0	2.29474	3.41958	PRMT5;SETD7
phospholipid transporter activity (GO:0005548)	17564	0.225332	0.379919	0	0	2.29474	3.41958	OSBPL8;ATP8A2
protein tyrosine kinase binding (GO:1990782)	17564	0.225332	0.379919	0	0	2.29474	3.41958	HSP90AA1;SQSTM1
sterol binding (GO:0032934)	1948-02-01	0.225332	0.379919	0	0	2.29474	3.41958	OSBPL8;ANXA6
lipoprotein transporter activity (GO:0042954)	44210	0.231759	0.379919	0	0	4.05583	5.92986	LRP1
phosphatidylinositol monophosphate phosphatase activity (GO:0052744)	2021-01-14	0.231759	0.379919	0	0	4.05583	5.92986	SACM1L
Rac guanyl-nucleotide exchange factor activity (GO:0030676)	44210	0.231759	0.379919	0	0	4.05583	5.92986	FARP1
MHC class I protein binding (GO:0042288)	44210	0.231759	0.379919	0	0	4.05583	5.92986	TUBB4B
calcium-transporting ATPase activity (GO:0005388)	44210	0.231759	0.379919	0	0	4.05583	5.92986	ATP2B1
1-phosphatidylinositol binding (GO:0005545)	2021-01-14	0.231759	0.379919	0	0	4.05583	5.92986	EEA1
L-glutamate transmembrane transporter activity (GO:0005313)	44210	0.231759	0.379919	0	0	4.05583	5.92986	SLC25A12
nucleoside kinase activity (GO:0019206)	44210	0.231759	0.379919	0	0	4.05583	5.92986	UCKL1
phosphatidylinositol-3-phosphatase activity (GO:0004438)	2021-01-14	0.231759	0.379919	0	0	4.05583	5.92986	SACM1L
growth factor receptor binding (GO:0070851)	33664	0.246045	0.390859	0	0	1.77996	2.49593	ATXN2;ERBB4;TIMM50
Rab guanyl-nucleotide exchange factor activity (GO:0017112)	1951-02-01	0.246064	0.390859	0	0	2.15391	3.02014	MADD;RAB3GAP1
3',5'-cyclic-AMP phosphodiesterase activity (GO:0004115)	2021-01-15	0.246096	0.390859	0	0	3.76594	5.27996	PDE1A
lipoprotein particle receptor activity (GO:0030228)	44211	0.246096	0.390859	0	0	3.76594	5.27996	LRP1
protein disulfide oxidoreductase activity (GO:0015035)	2021-01-15	0.246096	0.390859	0	0	3.76594	5.27996	CHCHD4
adrenergic receptor binding (GO:0031690)	44211	0.246096	0.390859	0	0	3.76594	5.27996	GNAS
syntaxin-1 binding (GO:0017075)	44211	0.246096	0.390859	0	0	3.76594	5.27996	STXBP5
FK506 binding (GO:0005528)	44211	0.246096	0.390859	0	0	3.76594	5.27996	FKBP8
myosin V binding (GO:0031489)	44211	0.246096	0.390859	0	0	3.76594	5.27996	RAB11B
calcium channel activity (GO:0005262)	34029	0.251043	0.39734	0	0	1.76009	2.43268	SLC24A3;GPRIN1;NCS1
retinoic acid receptor binding (GO:0042974)	44212	0.260167	0.404803	0	0	3.5147	4.73229	ACTN4
ubiquitin-specific protease binding (GO:1990381)	44212	0.260167	0.404803	0	0	3.5147	4.73229	BAG6
phosphatidic acid binding (GO:0070300)	44212	0.260167	0.404803	0	0	3.5147	4.73229	OPA1
potassium ion antiporter activity (GO:0022821)	44212	0.260167	0.404803	0	0	3.5147	4.73229	SLC24A3
protein transmembrane transporter activity (GO:0008320)	2021-01-16	0.260167	0.404803	0	0	3.5147	4.73229	SEC61B
protein kinase activator activity (GO:0030295)	1955-02-01	0.273795	0.419184	0	0	1.99095	2.57903	MADD;PAK2
RNA cap binding (GO:0000339)	2021-01-17	0.273976	0.419184	0	0	3.29486	4.2659	EIF4A1
H4 histone acetyltransferase activity (GO:0010485)	2021-01-17	0.273976	0.419184	0	0	3.29486	4.2659	ELP3
metalloaminopeptidase activity (GO:0070006)	44213	0.273976	0.419184	0	0	3.29486	4.2659	LNPEP
low-density lipoprotein particle binding (GO:0030169)	44213	0.273976	0.419184	0	0	3.29486	4.2659	CDH13
fatty acid ligase activity (GO:0015645)	44214	0.287528	0.435562	0	0	3.10089	3.86505	ACSL1
hyaluronic acid binding (GO:0005540)	44214	0.287528	0.435562	0	0	3.10089	3.86505	VCAN
protein kinase A regulatory subunit binding (GO:0034237)	2021-01-18	0.287528	0.435562	0	0	3.10089	3.86505	AKAP5
protein tyrosine kinase activity (GO:0004713)	4/147	0.294309	0.439558	0	0	1.47698	1.80653	NTRK2;HSP90AA1;ERBB4;LMTK2
intracellular chloride channel activity (GO:0061778)	2021-01-19	0.300828	0.439558	0	0	2.92846	3.51772	TTYH3
lysophospholipase activity (GO:0004622)	2021-01-19	0.300828	0.439558	0	0	2.92846	3.51772	GDPD1
intracellular calcium activated chloride channel activity (GO:0005229)	2021-01-19	0.300828	0.439558	0	0	2.92846	3.51772	TTYH3
ephrin receptor binding (GO:0046875)	2021-01-19	0.300828	0.439558	0	0	2.92846	3.51772	ANKS1B
gamma-tubulin binding (GO:0043015)	44215	0.300828	0.439558	0	0	2.92846	3.51772	RAB11FIP5
cadherin binding involved in cell-cell adhesion (GO:0098641)	2021-01-19	0.300828	0.439558	0	0	2.92846	3.51772	PPP1CA
R-SMAD binding (GO:0070412)	2021-01-19	0.300828	0.439558	0	0	2.92846	3.51772	DDX5
insulin receptor binding (GO:0005158)	44215	0.300828	0.439558	0	0	2.92846	3.51772	SORBS1
FAD binding (GO:0071949)	2021-01-19	0.300828	0.439558	0	0	2.92846	3.51772	MICAL3
nuclease activity (GO:0004518)	21582	0.30148	0.439558	0	0	1.85085	2.21927	DDX1;SND1
carboxylic ester hydrolase activity (GO:0052689)	3/103	0.301658	0.439558	0	0	1.58327	1.89749	NLGN1;GDPD1;PAFAH1B2
methyl-CpG binding (GO:0008327)	2021-01-20	0.313879	0.447424	0	0	2.77419	3.21459	PRMT5
ubiquitin conjugating enzyme activity (GO:0061631)	2021-01-20	0.313879	0.447424	0	0	2.77419	3.21459	UBE2J1
proteasome binding (GO:0070628)	44216	0.313879	0.447424	0	0	2.77419	3.21459	BAG6
K63-linked polyubiquitin modification-dependent protein binding (GO:0070530)	44216	0.313879	0.447424	0	0	2.77419	3.21459	SQSTM1
low-density lipoprotein particle receptor binding (GO:0050750)	2021-01-20	0.313879	0.447424	0	0	2.77419	3.21459	LANCL1
3',5'-cyclic-nucleotide phosphodiesterase activity (GO:0004114)	2021-01-20	0.313879	0.447424	0	0	2.77419	3.21459	PDE1A
phospholipid-translocating ATPase activity (GO:0004012)	44216	0.313879	0.447424	0	0	2.77419	3.21459	ATP8A2
protein serine/threonine phosphatase activity (GO:0004722)	22313	0.315262	0.448003	0	0	1.78793	2.0639	TIMM50;PPP1CA
RNA polymerase II regulatory region DNA binding (GO:0001012)	5/201	0.321454	0.4503	0	0	1.34698	1.52869	PURA;CNBP;RPS3;ACTN4;PURG
ubiquitin binding (GO:0043130)	1962-02-01	0.32213	0.4503	0	0	1.75804	1.99151	SQSTM1;SIRT2
scavenger receptor activity (GO:0005044)	44217	0.326688	0.4503	0	0	2.63535	2.94829	LRP1
lysine N-methyltransferase activity (GO:0016278)	44217	0.326688	0.4503	0	0	2.63535	2.94829	SETD7
adenylyltransferase activity (GO:0070566)	44217	0.326688	0.4503	0	0	2.63535	2.94829	GPHN
calcium-dependent cysteine-type endopeptidase activity (GO:0004198)	44217	0.326688	0.4503	0	0	2.63535	2.94829	CAPNS1
protein binding involved in cell-cell adhesion (GO:0098632)	44217	0.326688	0.4503	0	0	2.63535	2.94829	PPP1CA
ubiquitin-like protein conjugating enzyme activity (GO:0061650)	2021-01-21	0.326688	0.4503	0	0	2.63535	2.94829	UBE2J1
inward rectifier potassium channel activity (GO:0005242)	2021-01-21	0.326688	0.4503	0	0	2.63535	2.94829	KCNJ6
phosphatidylinositol-3,5-bisphosphate binding (GO:0080025)	2021-01-21	0.326688	0.4503	0	0	2.63535	2.94829	SNX3
small GTPase binding (GO:0031267)	1963-02-01	0.328981	0.452103	0	0	1.72913	1.92237	RILPL1;PAK2
NAD binding (GO:0051287)	2021-01-22	0.339259	0.462077	0	0	2.50973	2.713	SIRT2
ATPase activity, coupled to transmembrane movement of ions, phosphorylative mechanism (GO:0015662)	2021-01-22	0.339259	0.462077	0	0	2.50973	2.713	ATP2B1
histone acetyltransferase binding (GO:0035035)	2021-01-22	0.339259	0.462077	0	0	2.50973	2.713	SIRT2
cysteine-type peptidase activity (GO:0008234)	23774	0.342625	0.46528	0	0	1.67407	1.79313	USP10;USP11
transcriptional repressor activity, RNA polymerase II transcription regulatory region sequence-specific binding (GO:0001227)	4/159	0.344875	0.466955	0	0	1.3618	1.44973	PURA;CHCHD3;CNBP;PURG
lipoprotein particle binding (GO:0071813)	44219	0.351595	0.474654	0	0	2.39553	2.50398	CDH13
protein kinase inhibitor activity (GO:0004860)	24504	0.356179	0.479431	0	0	1.62239	1.67483	CDKN1B;CAMK2N1
disulfide oxidoreductase activity (GO:0015036)	44220	0.363702	0.47971	0	0	2.29126	2.31743	CHCHD4
protein-cysteine S-palmitoyltransferase activity (GO:0019706)	44220	0.363702	0.47971	0	0	2.29126	2.31743	ZDHHC17
kinase activator activity (GO:0019209)	2021-01-24	0.363702	0.47971	0	0	2.29126	2.31743	MADD
protein-cysteine S-acyltransferase activity (GO:0019707)	2021-01-24	0.363702	0.47971	0	0	2.29126	2.31743	ZDHHC17
phosphatidylinositol-3,4-bisphosphate binding (GO:0043325)	44220	0.363702	0.47971	0	0	2.29126	2.31743	PLEKHA1
acetyltransferase activity (GO:0016407)	44220	0.363702	0.47971	0	0	2.29126	2.31743	PAFAH1B2
ATPase coupled ion transmembrane transporter activity (GO:0042625)	44220	0.363702	0.47971	0	0	2.29126	2.31743	ATP2B1
phospholipase activity (GO:0004620)	25235	0.369632	0.486135	0	0	1.5738	1.56632	GDPD1;PAFAH1B2
ion gated channel activity (GO:0022839)	44221	0.375583	0.49255	0	0	2.19568	2.15017	TTYH3
protein serine/threonine kinase activity (GO:0004674)	8/368	0.380491	0.497566	0	0	1.17303	1.13349	CDKN1B;CSNK1A1;DCLK2;LMTK2;CDC42BPA;PAK2;SQSTM1;CIT
carboxy-lyase activity (GO:0016831)	2021-01-26	0.387243	0.500689	0	0	2.10774	1.99962	GAD2
SH2 domain binding (GO:0042169)	2021-01-26	0.387243	0.500689	0	0	2.10774	1.99962	SQSTM1
calcium channel regulator activity (GO:0005246)	2021-01-26	0.387243	0.500689	0	0	2.10774	1.99962	ITPR1
alpha-tubulin binding (GO:0043014)	44222	0.387243	0.500689	0	0	2.10774	1.99962	ARL8A
Rho GTPase binding (GO:0017048)	1972-02-01	0.389598	0.502318	0	0	1.50612	1.41973	IQGAP2;PAK2
cyclin-dependent protein serine/threonine kinase regulator activity (GO:0016538)	2021-01-27	0.398686	0.511164	0	0	2.02657	1.8636	CDKN1B
Hsp70 protein binding (GO:0030544)	2021-01-27	0.398686	0.511164	0	0	2.02657	1.8636	RPS3
kinesin binding (GO:0019894)	44224	0.409915	0.521194	0	0	1.95141	1.74028	NEFH
dicarboxylic acid transmembrane transporter activity (GO:0005310)	44224	0.409915	0.521194	0	0	1.95141	1.74028	SLC25A12
palmitoyltransferase activity (GO:0016409)	2021-01-28	0.409915	0.521194	0	0	1.95141	1.74028	ZDHHC17
steroid hormone receptor binding (GO:0035258)	1976-02-01	0.415769	0.527177	0	0	1.42442	1.2501	DDX5;YWHAH
cation-transporting ATPase activity (GO:0019829)	2021-01-29	0.420936	0.530796	0	0	1.88162	1.62812	ATP2B1
phosphotyrosine residue binding (GO:0001784)	44225	0.420936	0.530796	0	0	1.88162	1.62812	PTPN5
phospholipase A2 activity (GO:0004623)	44226	0.431751	0.537056	0	0	1.81665	1.52581	PAFAH1B2
Hsp90 protein binding (GO:0051879)	44226	0.431751	0.537056	0	0	1.81665	1.52581	RPS3
MHC protein binding (GO:0042287)	2021-01-30	0.431751	0.537056	0	0	1.81665	1.52581	TUBB4B
glutathione transferase activity (GO:0004364)	2021-01-30	0.431751	0.537056	0	0	1.81665	1.52581	EEF1G
deoxyribonuclease activity (GO:0004536)	44226	0.431751	0.537056	0	0	1.81665	1.52581	RPS3
phosphatidylinositol-3,4,5-trisphosphate binding (GO:0005547)	11689	0.452781	0.561693	0	0	1.69927	1.34641	IQGAP2
ubiquitin-like protein ligase activity (GO:0061659)	4/186	0.458056	0.566705	0	0	1.15816	0.904254	NEDD4L;SKP1;RBX1;UBE2J1
cyclin-dependent protein serine/threonine kinase activity (GO:0004693)	1933-01-01	0.463003	0.569793	0	0	1.64609	1.26752	CDKN1B
transcription regulatory region sequence-specific DNA binding (GO:0000976)	6/292	0.463034	0.569793	0	0	1.1056	0.851261	PRMT5;PURA;CNBP;RPS3;ACTN4;PURG
cyclin-dependent protein kinase activity (GO:0097472)	1934-01-01	0.473034	0.578994	0	0	1.59612	1.19484	CDKN1B
carboxylic acid binding (GO:0031406)	1934-01-01	0.473034	0.578994	0	0	1.59612	1.19484	VCAN
ubiquitin protein ligase activity (GO:0061630)	4/192	0.482445	0.584806	0	0	1.12086	0.816979	NEDD4L;SKP1;RBX1;UBE2J1
ubiquitin-like protein conjugating enzyme binding (GO:0044390)	12785	0.482879	0.584806	0	0	1.5491	1.12773	RPS3
neuropeptide receptor activity (GO:0008188)	1935-01-01	0.482879	0.584806	0	0	1.5491	1.12773	NTSR1
endodeoxyribonuclease activity (GO:0004520)	1935-01-01	0.482879	0.584806	0	0	1.5491	1.12773	RPS3
phosphatidylinositol bisphosphate binding (GO:1902936)	1987-02-01	0.484624	0.585375	0	0	1.23938	0.897787	SNX3;PLEKHA1
protein kinase activity (GO:0004672)	10/513	0.488548	0.588565	0	0	1.04738	0.750257	NTRK2;HSP90AA1;CSNK1A1;ERBB4;DCLK2;LMTK2;CDC42BPA;PAK2;SQSTM1;CIT
peptidase inhibitor activity (GO:0030414)	1936-01-01	0.49254	0.588739	0	0	1.50476	1.06564	PCSK1N
snRNA binding (GO:0017069)	13150	0.49254	0.588739	0	0	1.50476	1.06564	SNRPB
endopeptidase regulator activity (GO:0061135)	13150	0.49254	0.588739	0	0	1.50476	1.06564	PCSK1N
voltage-gated calcium channel activity (GO:0005245)	1937-01-01	0.502021	0.598514	0	0	1.46289	1.00809	NCS1
tRNA binding (GO:0000049)	1938-01-01	0.511326	0.606456	0	0	1.42328	0.954661	EEF1A1
potassium ion transmembrane transporter activity (GO:0015079)	1938-01-01	0.511326	0.606456	0	0	1.42328	0.954661	SLC12A5
receptor tyrosine kinase binding (GO:0030971)	1939-01-01	0.520457	0.612538	0	0	1.38575	0.904963	SQSTM1
peptide-lysine-N-acetyltransferase activity (GO:0061733)	1939-01-01	0.520457	0.612538	0	0	1.38575	0.904963	ELP3
RNA polymerase II transcription coactivator activity (GO:0001105)	14246	0.520457	0.612538	0	0	1.38575	0.904963	TRIM28
integrin binding (GO:0005178)	1994-02-01	0.525747	0.616758	0	0	1.14467	0.735951	ACTN4;THY1
protein kinase C binding (GO:0005080)	14611	0.529418	0.616758	0	0	1.35015	0.858666	SQSTM1
hormone receptor binding (GO:0051427)	1940-01-01	0.529418	0.616758	0	0	1.35015	0.858666	ACTN4
histone deacetylase activity (GO:0004407)	14611	0.529418	0.616758	0	0	1.35015	0.858666	SIRT2
histone-lysine N-methyltransferase activity (GO:0018024)	14977	0.538212	0.622265	0	0	1.31633	0.815471	SETD7
copper ion binding (GO:0005507)	1941-01-01	0.538212	0.622265	0	0	1.31633	0.815471	PRNP
histone acetyltransferase activity (GO:0004402)	1941-01-01	0.538212	0.622265	0	0	1.31633	0.815471	ELP3
core promoter binding (GO:0001047)	1997-02-01	0.542682	0.625857	0	0	1.10836	0.677463	PRMT5;DHX36
androgen receptor binding (GO:0050681)	1942-01-01	0.546842	0.625936	0	0	1.28416	0.775113	DDX5
transferase activity, transferring pentosyl groups (GO:0016763)	1942-01-01	0.546842	0.625936	0	0	1.28416	0.775113	NAMPT
protein deacetylase activity (GO:0033558)	15342	0.546842	0.625936	0	0	1.28416	0.775113	SIRT2
metallopeptidase activity (GO:0008237)	2/102	0.569962	0.650778	0	0	1.05267	0.591795	LNPEP;BRCC3
P-P-bond-hydrolysis-driven transmembrane transporter activity (GO:0015405)	16438	0.571779	0.651232	0	0	1.19642	0.668803	SEC61B
protein-lysine N-methyltransferase activity (GO:0016279)	1947-01-01	0.587638	0.667638	0	0	1.14428	0.608352	SETD7
inorganic anion transmembrane transporter activity (GO:0015103)	17533	0.595347	0.674726	0	0	1.11988	0.580783	SLC12A5
L-amino acid transmembrane transporter activity (GO:0015179)	17899	0.602912	0.680864	0	0	1.09649	0.554809	SLC25A12
regulatory region DNA binding (GO:0000975)	4/224	0.603729	0.680864	0	0	0.956245	0.48255	HNRNPL;ERBB4;DHX36;PHB
transcriptional activator activity, RNA polymerase II transcription factor binding (GO:0001190)	1950-01-01	0.610335	0.686627	0	0	1.07406	0.530314	TRIM28
sequence-specific double-stranded DNA binding (GO:1990837)	2/112	0.62093	0.696839	0	0	0.956481	0.455798	PURA;PURG
methylation-dependent protein binding (GO:0140034)	18994	0.62477	0.699438	0	0	1.03184	0.485346	FMR1
metalloexopeptidase activity (GO:0008235)	1954-01-01	0.638672	0.713262	0	0	0.992798	0.445135	LNPEP
methylated histone binding (GO:0035064)	1955-01-01	0.645429	0.719058	0	0	0.974363	0.426615	FMR1
amino acid transmembrane transporter activity (GO:0015171)	20455	0.65206	0.719461	0	0	0.956598	0.409059	SLC25A12
ATPase activity, coupled to movement of substances (GO:0043492)	20455	0.65206	0.719461	0	0	0.956598	0.409059	ATP8A2
nuclear hormone receptor binding (GO:0035257)	1956-01-01	0.65206	0.719461	0	0	0.956598	0.409059	ACTN4
transferase activity, transferring acyl groups other than amino-acyl groups (GO:0016747)	1956-01-01	0.65206	0.719461	0	0	0.956598	0.409059	ZDHHC17
ubiquitin-protein transferase activity (GO:0004842)	7/417	0.663208	0.730006	0	0	0.896435	0.368136	TRIM28;TRAF3;FBXO2;NEDD4L;SKP1;UBE2J1;RBX1
kinase inhibitor activity (GO:0019210)	1959-01-01	0.67122	0.737057	0	0	0.90698	0.361575	CDKN1B
ATPase binding (GO:0051117)	1963-01-01	0.69514	0.758739	0	0	0.848292	0.308475	ATP6V1G1
phosphotransferase activity, alcohol group as acceptor (GO:0016773)	4/254	0.70037	0.758739	0	0	0.840195	0.299232	PDXK;CSNK1A1;PAK2;DGKZ
carboxylic acid transmembrane transporter activity (GO:0046943)	1964-01-01	0.700843	0.758739	0	0	0.834784	0.296742	EMB
transcription factor activity, RNA polymerase II distal enhancer sequence-specific binding (GO:0003705)	23377	0.700843	0.758739	0	0	0.834784	0.296742	PURA
G-protein coupled peptide receptor activity (GO:0008528)	1964-01-01	0.700843	0.758739	0	0	0.834784	0.296742	INPP5K
transcription regulatory region DNA binding (GO:0044212)	6/374	0.700883	0.758739	0	0	0.855601	0.304092	HNRNPL;PURA;ERBB4;DHX36;PHB;PURG
ligand-dependent nuclear receptor transcription coactivator activity (GO:0030374)	1965-01-01	0.70644	0.762956	0	0	0.821699	0.285554	ACTN4
methyltransferase activity (GO:0008168)	24473	0.717323	0.772891	0	0	0.796717	0.264692	PRMT5
phosphatidylinositol-4,5-bisphosphate 3-kinase activity (GO:0046934)	24838	0.722613	0.776767	0	0	0.784786	0.254962	ERBB4
transcription corepressor activity (GO:0003714)	3/203	0.733029	0.785834	0	0	0.787581	0.244599	PRMT5;TRIM28;SRSF2
G-protein coupled receptor activity (GO:0004930)	4/267	0.7366	0.785834	0	0	0.798129	0.243996	GABBR1;LANCL1;NTSR1;GRM1
sodium ion transmembrane transporter activity (GO:0015081)	1971-01-01	0.737897	0.785834	0	0	0.751037	0.228279	SLC24A3
phosphatidylinositol bisphosphate kinase activity (GO:0052813)	1971-01-01	0.737897	0.785834	0	0	0.751037	0.228279	ERBB4
DNA-dependent ATPase activity (GO:0008094)	1972-01-01	0.742802	0.787055	0	0	0.740421	0.220146	DHX36
heme binding (GO:0020037)	26299	0.742802	0.787055	0	0	0.740421	0.220146	PTGES2
core promoter sequence-specific DNA binding (GO:0001046)	1973-01-01	0.747616	0.787055	0	0	0.7301	0.212361	PRMT5
cytokine receptor activity (GO:0004896)	1973-01-01	0.747616	0.787055	0	0	0.7301	0.212361	CNTN1
endonuclease activity (GO:0004519)	1973-01-01	0.747616	0.787055	0	0	0.7301	0.212361	RPS3
hydrolase activity, acting on carbon-nitrogen (but not peptide) bonds, in linear amides (GO:0016811)	27395	0.756976	0.795085	0	0	0.710295	0.197763	SIRT2
cation channel activity (GO:0005261)	2/146	0.75948	0.795893	0	0	0.729373	0.200666	SLC24A3;GPRIN1
phosphatidylinositol 3-kinase activity (GO:0035004)	27760	0.761526	0.79622	0	0	0.700789	0.190917	ERBB4
syntaxin binding (GO:0019905)	28126	0.76599	0.799067	0	0	0.691532	0.184353	STXBP5
kinase activity (GO:0016301)	4/280	0.769436	0.800841	0	0	0.760025	0.199201	PDXK;CSNK1A1;PAK2;DGKZ
transcription coactivator activity (GO:0003713)	4/291	0.794647	0.823706	0	0	0.73048	0.167906	DDX17;TRIM28;FUS;ACTN4
RNA polymerase II transcription cofactor activity (GO:0001104)	30682	0.794993	0.823706	0	0	0.632984	0.145221	TRIM28
motor activity (GO:0003774)	31048	0.798832	0.823964	0	0	0.625416	0.140471	PIN1
voltage-gated potassium channel activity (GO:0005249)	31048	0.798832	0.823964	0	0	0.625416	0.140471	KCNJ6
cation transmembrane transporter activity (GO:0008324)	1997-01-01	0.839677	0.864152	0	0	0.546903	0.0955649	ATP2B1
voltage-gated cation channel activity (GO:0022843)	1/100	0.848523	0.871302	0	0	0.530249	0.0870976	NCS1
sequence-specific DNA binding (GO:0043565)	5/394	0.861495	0.880884	0	0	0.671943	0.100177	PRMT5;PURA;TRIM28;HNRNPD;PURG
RNA polymerase II regulatory region sequence-specific DNA binding (GO:0000977)	6/460	0.861692	0.880884	0	0	0.69043	0.102775	PURA;HNRNPK;CNBP;RPS3;ACTN4;PURG
endopeptidase inhibitor activity (GO:0004866)	1/111	0.876992	0.894532	0	0	0.476955	0.0626036	PCSK1N
DNA binding (GO:0003677)	12/893	0.909457	0.92559	0	0	0.707305	0.0671284	DDB1;PURA;KHDRBS1;ILF3;HNRNPK;TRIM28;FUBP1;DHX36;RPS3;NUCKS1;TARDBP;PURG
cytokine receptor binding (GO:0005126)	1/137	0.924833	0.939156	0	0	0.385259	0.0301047	TIMM50
transcriptional activator activity, RNA polymerase II core promoter proximal region sequence-specific binding (GO:0001077)	1/175	0.96345	0.976211	0	0	0.300535	0.0111904	HNRNPK
serine-type endopeptidase activity (GO:0004252)	1/196	0.975476	0.986219	0	0	0.26788	0.00665131	CNTN1
serine-type peptidase activity (GO:0008236)	1/220	0.984465	0.99312	0	0	0.238229	0.00372991	CNTN1
RNA polymerase II core promoter proximal region sequence-specific DNA binding (GO:0000978)	1/262	0.993021	0.995413	0	0	0.19946	0.00139688	HNRNPK
core promoter proximal region sequence-specific DNA binding (GO:0000987)	1/278	0.994857	0.995413	0	0	0.187784	0.000968277	HNRNPK
transcription factor activity, RNA polymerase II core promoter proximal region sequence-specific binding (GO:0000982)	1/280	0.99505	0.995413	0	0	0.186418	0.00092515	HNRNPK
transcriptional activator activity, RNA polymerase II transcription regulatory region sequence-specific binding (GO:0001228)	1/284	0.995413	0.995413	0	0	0.183746	0.000844703	HNRNPK

## Sheet: VM_373_GO_CC
Term	Overlap	P-value	Adjusted P-value	Old P-value	Old Adjusted P-value	Odds Ratio	Combined Score	Genes
dendrite (GO:0030425)	24/215	2.37197e-12	5.55041e-10	0	0	6.99776	187.311	GRIA1;GABRA1;MPP2;FARP1;PRNP;NLGN1;HOMER1;HOMER2;FMR1;GABRA3;THY1;CPT1C;ELFN1;GPHN;OPA1;MAP2;TUBB3;GPRIN1;MAP1A;ATXN10;SHANK3;DBN1;SHANK2;SHANK1
ionotropic glutamate receptor complex (GO:0008328)	14489	3.20535e-08	3.75026e-06	0	0	16.1514	278.706	GRIA1;DLG3;GPRIN1;GRIN2B;SHANK3;GRIA3;SHANK2;GRIN2D;SHANK1
nuclear proteasome complex (GO:0031595)	44324	1.1747e-07	9.16265e-06	0	0	88.8768	1418.21	PSMC5;PSMC6;PSMC4;PSMC1;PSMC2
cytosolic proteasome complex (GO:0031597)	44325	2.60262e-07	1.52253e-05	0	0	66.6542	1010.58	PSMC5;PSMC6;PSMC4;PSMC1;PSMC2
cytoplasmic ribonucleoprotein granule (GO:0036464)	14/170	3.88278e-06	0.000181714	0	0	4.8674	60.6428	DDX6;FMR1;DDX1;CIRBP;EIF2S1;ATXN2L;FXR1;PSMA6;ATXN2;PSMA2;PSMC2;HABP4;SQSTM1;INA
cytoplasmic stress granule (GO:0010494)	15158	9.65745e-06	0.000376641	0	0	11.0215	127.273	ATXN2L;DDX6;ATXN2;DDX1;HABP4;CIRBP;EIF2S1
NMDA selective glutamate receptor complex (GO:0017146)	44295	1.39291e-05	0.000465631	0	0	42.5409	475.673	GPRIN1;GRIN2B;SHANK1;GRIN2D
early endosome (GO:0005769)	15/222	1.94781e-05	0.000502865	0	0	3.93086	42.6349	NTRK2;RABGAP1L;LRP1;SORT1;USP10;LMTK2;LNPEP;PHB;TMEM230;SNX3;EEA1;SNX27;VPS35;VTI1B;RAB11FIP5
GABA-A receptor complex (GO:1902711)	44335	2.0591e-05	0.000502865	0	0	19.0344	205.393	GABRB3;GABRB2;GABRA1;GABRB1;GABRA3
polysome (GO:0005844)	23224	2.14899e-05	0.000502865	0	0	7.79955	83.829	FXR1;PSMA6;ATXN2;PSMA1;FMR1;RPS3;EIF2S1;ZC3H15
cytoplasmic vesicle lumen (GO:0060205)	11/129	3.05694e-05	0.000650296	0	0	5.02386	52.2255	EEF1A1;PSMA5;PSMB7;HSP90AA1;PDXK;PSMD11;HSP90AB1;PSMA2;PSMC2;EEF2;PAFAH1B2
neurotransmitter receptor complex (GO:0098878)	44298	5.23426e-05	0.00102068	0	0	26.584	262.057	DLG3;SHANK3;SHANK2;SHANK1
ficolin-1-rich granule lumen (GO:1904813)	10/123	0.000104505	0.00188109	0	0	4.75731	43.6068	EEF1A1;PSMA5;PSMB7;HSP90AA1;PSMD11;HSP90AB1;PSMA2;PSMC2;EEF2;PAFAH1B2
paranode region of axon (GO:0033270)	44261	0.000123431	0.00193142	0	0	53.0378	477.332	CNTNAP1;EPB41L3;SIRT2
lysosomal membrane (GO:0005765)	16/291	0.000123809	0.00193142	0	0	3.15388	28.3747	ATP6V1G1;LRP1;LNPEP;GNAI1;EEF1A1;NCSTN;GNAQ;GNA11;EEF1A2;VPS41;CPNE1;ANXA6;VPS35;ARL8A;VTI1B;RAB7A
actin cytoskeleton (GO:0015629)	16/294	0.000139322	0.00203759	0	0	3.11936	27.6959	ACTR3;TPM3;TPM1;ALG2;CASK;DSTN;ACTN4;IQGAP2;CDC42BPA;KALRN;CORO1C;EEF1A1;ARHGAP32;CAPZA1;MYO18A;DBN1
ficolin-1-rich granule (GO:0101002)	12/184	0.00018278	0.00251591	0	0	3.7599	32.3624	EEF1A1;PSMA5;PSMB7;HSP90AA1;PSMD11;HSP90AB1;PSMA2;COPB1;PSMC2;EEF2;ARL8A;PAFAH1B2
cytosolic part (GO:0044445)	11/159	0.000202091	0.00262719	0	0	3.99935	34.0216	PSMC5;PSMC6;PSMC4;PSMC1;PSMC2;RPS3;RPS3A;RPL26;CCT7;PFKM;CCT4
actomyosin (GO:0042641)	17685	0.000256026	0.00315316	0	0	7.62359	63.0489	TPM3;TPM1;MYO18A;SORBS1;CDC42BPA;DBN1
secretory granule lumen (GO:0034774)	16/317	0.000325824	0.00360725	0	0	2.87758	23.1045	HSP90AA1;PDXK;PSMD11;HSP90AB1;PTGES2;ACTN4;TUBB4B;EEF2;PSMA5;EEF1A1;PSMB7;LRRC7;PSMA2;PSMC2;PAFAH1B2;VTI1B
cytoskeleton (GO:0005856)	22/520	0.000331886	0.00360725	0	0	2.40757	19.2863	ACTR3;MPP2;TPM3;TPM1;ALG2;DCLK2;CASK;DSTN;ACTN4;IQGAP2;TUBB4B;KALRN;CORO1C;ARHGAP32;TUBA1B;CAPZA1;EPB41L3;NEFM;MAP4;NEFH;INA;DBN1
main axon (GO:0044304)	12175	0.000339143	0.00360725	0	0	9.51038	75.9793	CNTNAP1;EPB41L3;CNTN2;THY1;SIRT2
nucleolus (GO:0005730)	26/676	0.000427981	0.00411868	0	0	2.18755	16.9676	EIF4A2;DDX6;DDX5;FMR1;DDX1;SETD7;NUCKS1;GNAI1;FXR1;MAP2;HABP4;RPS3;ZNF207;ZC3H15;DDX17;CIRBP;ELP1;CASK;ELP3;RPS3A;SIRT2;EEF1A1;ILF3;EWSR1;RPL26;PAFAH1B2
ruffle membrane (GO:0032587)	19511	0.000442949	0.00411868	0	0	6.81083	52.5936	EEF1A1;PSD2;PLEKHA1;TPM1;RPS3;INPP5K
dendrite membrane (GO:0032590)	44306	0.000455232	0.00411868	0	0	13.2866	102.236	MPP2;GABRA1;GABRA3;THY1
lytic vacuole membrane (GO:0098852)	13/233	0.000457632	0.00411868	0	0	3.18549	24.4947	ATP6V1G1;LRP1;LNPEP;GNAI1;NCSTN;GNAQ;GNA11;VPS41;ANXA6;VPS35;ARL8A;VTI1B;RAB7A
juxtaparanode region of axon (GO:0044224)	44264	0.000497206	0.00430912	0	0	26.5149	201.685	EPB41L3;CNTN2;SIRT2
methylosome (GO:0034709)	44267	0.00124909	0.0104373	0	0	17.6739	118.156	PRMT5;SNRPE;SNRPB
cation channel complex (GO:0034703)	23894	0.00132176	0.0104373	0	0	5.42225	35.943	GRIA1;GPRIN1;GRIN2B;GRIA3;SHANK1;GRIN2D
axon (GO:0030424)	9/141	0.00133812	0.0104373	0	0	3.65166	24.1612	FXR1;NTRK2;ALCAM;FMR1;DAB2IP;NEFL;NEFM;CPT1C;NEFH
Cul4A-RING E3 ubiquitin ligase complex (GO:0031464)	44268	0.00160147	0.0120885	0	0	15.9057	102.382	DDB1;CDKN1B;RBX1
recycling endosome (GO:0055037)	8/119	0.00176594	0.0129135	0	0	3.85359	24.4281	GRIA1;RAP2B;TFRC;LMTK2;TMEM230;VTI1B;RAB11FIP5;RAB11B
intrinsic component of the cytoplasmic side of the plasma membrane (GO:0031235)	44270	0.00247824	0.017573	0	0	13.2534	79.523	SYNGAP1;RASA3;DAB2IP
focal adhesion (GO:0005925)	15/356	0.00296795	0.0201852	0	0	2.36971	13.7915	ACTR3;LRP1;ITGA3;CASK;RPS3A;ACTN4;THY1;SORBS1;CORO1C;NCSTN;ALCAM;HNRNPK;ANXA6;RPS3;CDH13
polymeric cytoskeletal fiber (GO:0099513)	11/221	0.00301915	0.0201852	0	0	2.80962	16.3036	TUBA1B;TUBB3;TPM3;MAP1A;TUBB1;TPM1;CCT7;TUBB4B;TUBB4A;SIRT2;CCT4
ribonucleoprotein granule (GO:0035770)	29373	0.00381029	0.0247669	0	0	4.31983	24.0617	FXR1;HNRNPL;DDX6;FMR1;PSMC2;INA
axolemma (GO:0030673)	44233	0.00495141	0.0313144	0	0	26.4461	140.378	EPB41L3;THY1
perinuclear region of cytoplasm (GO:0048471)	15/378	0.00515121	0.0317206	0	0	2.22356	11.7149	EIF4A2;TFRC;ANP32A;SORT1;FMR1;ALG2;GDPD1;M6PR;LMTK2;ACTN4;SIRT2;ATXN2;INPP5K;ATXN10;VTI1B
U7 snRNP (GO:0005683)	44234	0.00684678	0.0410807	0	0	21.1558	105.44	SNRPE;SNRPB
intrinsic component of external side of plasma membrane (GO:0031233)	44277	0.00761663	0.0445573	0	0	8.36757	40.8122	PRNP;CNTN1;THY1
P-body (GO:0000932)	24959	0.00876592	0.0500299	0	0	4.21929	19.9863	PSMA6;DDX6;PSMA2;PSMC2;SQSTM1
G-protein coupled receptor dimeric complex (GO:0038037)	44235	0.00901702	0.0502377	0	0	17.6289	83.0083	GABBR1;GRM1
integral component of plasma membrane (GO:0005887)	40/1463	0.00970179	0.0527958	0	0	1.53666	7.1231	GABRB3;GABRB2;GABRB1;CNTNAP1;NLGN1;SLC24A3;TFRC;LRP1;THY1;PHB;GRM1;NCSTN;ALCAM;PTPRZ1;ERBB4;LMAN2;STXBP5;EMB;NTSR1;GABRA1;MPP2;NTRK2;GABBR1;GABRA3;SIGMAR1;M6PR;LMTK2;LNPEP;SORBS1;ATP2B1;GRIN2B;GRIN2D;DLG3;TRAF3;GPRIN1;CNTN2;SHANK3;CD200;SHANK2;SHANK1
coated vesicle (GO:0030135)	26054	0.0104668	0.0545323	0	0	4.02689	18.3608	SNX3;LMAN2L;SORT1;LMAN2;VPS41
intermediate filament (GO:0005882)	16893	0.010487	0.0545323	0	0	5.05485	23.0381	CSNK1A1;NEFL;NEFH;SHANK2
U4/U6 x U5 tri-snRNP complex (GO:0046540)	44280	0.010917	0.0555344	0	0	7.22543	32.6404	EFTUD2;SNRPE;SNRPB
late endosome membrane (GO:0031902)	17624	0.0121478	0.0604805	0	0	4.82459	21.2794	VPS41;ANXA6;VTI1B;RAB7A
lysosome (GO:0005764)	15/422	0.0133518	0.0650902	0	0	1.97864	8.54002	ATP6V1G1;HSP90AA1;LRP1;LNPEP;GNAI1;NCSTN;VCAN;GNAQ;GNA11;VPS41;ANXA6;VPS35;ARL8A;VTI1B;RAB7A
ribosome (GO:0005840)	27881	0.0137807	0.0658099	0	0	3.74235	16.034	FMR1;RPS3;RPL26;EIF2S1;ZC3H15
filopodium tip (GO:0032433)	44237	0.014139	0.0661703	0	0	13.2204	56.3031	NLGN1;FMR1
microtubule cytoskeleton (GO:0015630)	14/388	0.0146727	0.067322	0	0	2.00752	8.47529	SPECC1;EXOC7;DCLK2;TUBB4B;TUBB4A;SIRT2;TUBA1B;TUBB3;MAP1A;TUBB1;MAP4;CCT7;RAB11FIP5;CCT4
U2-type catalytic step 2 spliceosome (GO:0071007)	44284	0.0164212	0.0738956	0	0	6.11258	25.1177	EFTUD2;SNRPE;SNRPB
microtubule (GO:0005874)	9/210	0.017378	0.0767256	0	0	2.38962	9.68404	TUBA1B;TUBB3;MAP1A;TUBB1;CCT7;TUBB4B;TUBB4A;SIRT2;CCT4
SCF ubiquitin ligase complex (GO:0019005)	19815	0.0181061	0.0784597	0	0	4.24434	17.0262	USP47;FBXO2;SKP1;RBX1
spliceosomal tri-snRNP complex (GO:0097526)	44286	0.0196577	0.0836347	0	0	5.67539	22.3002	EFTUD2;SNRPE;SNRPB
U4 snRNP (GO:0005687)	44239	0.020234	0.0845493	0	0	10.5752	41.2474	SNRPE;SNRPB
mitochondrial intermembrane space (GO:0005758)	20911	0.02166	0.0889199	0	0	4.00348	15.3425	CHCHD4;TIMM10B;NDUFA8;OPA1
chaperonin-containing T-complex (GO:0005832)	44240	0.0236218	0.0939717	0	0	9.61333	36.0076	CCT7;CCT4
nuclear speck (GO:0016607)	11/296	0.0236937	0.0939717	0	0	2.06225	7.71805	DDX17;EFTUD2;ATXN2L;CSNK1A1;NAMPT;SRSF1;HABP4;SRSF2;SRSF3;DGKZ;TIMM50
membrane raft (GO:0045121)	6/119	0.0241828	0.0943127	0	0	2.82327	10.5086	PRNP;STX12;RAP2B;THY1;SORBS1;NTSR1
Cajal body (GO:0015030)	12479	0.025124	0.0963774	0	0	5.12537	18.8815	EFTUD2;HNRNPA2B1;HABP4
filopodium (GO:0030175)	22007	0.025612	0.0966645	0	0	3.78842	13.8834	NLGN1;ITGA3;FMR1;IQGAP2
endoplasmic reticulum subcompartment (GO:0098827)	44241	0.0272237	0.101117	0	0	8.81177	31.7547	RAB18;RAB3GAP1
Cul4-RING E3 ubiquitin ligase complex (GO:0080008)	13210	0.0291758	0.106674	0	0	4.81425	17.0156	DDB1;CDKN1B;RBX1
contractile actin filament bundle (GO:0097517)	14671	0.0382478	0.135295	0	0	4.29291	14.0106	TPM3;TPM1;SORBS1
stress fiber (GO:0001725)	14671	0.0382478	0.135295	0	0	4.29291	14.0106	TPM3;TPM1;SORBS1
endoplasmic reticulum tubular network (GO:0071782)	44244	0.0392248	0.135295	0	0	7.04834	22.8257	RAB18;RAB3GAP1
clathrin-coated vesicle (GO:0030136)	5/100	0.0393166	0.135295	0	0	2.79348	9.04	SNX3;TFRC;SORT1;VPS41;M6PR
mitochondrial envelope (GO:0005740)	25294	0.0399261	0.135402	0	0	3.26237	10.5072	CHCHD4;TIMM10B;NDUFA8;OPA1
aggresome (GO:0016235)	15036	0.040715	0.136104	0	0	4.17973	13.38	EEF2;ZDHHC17;SQSTM1
AMPA glutamate receptor complex (GO:0032281)	44245	0.0435948	0.141683	0	0	6.60748	20.7	GRIA1;GRIA3
anchored component of external side of plasma membrane (GO:0031362)	44245	0.0435948	0.141683	0	0	6.60748	20.7	PRNP;THY1
late endosome (GO:0005770)	6/140	0.0475671	0.152214	0	0	2.37826	7.24326	VPS41;ANXA6;VPS35;TMEM230;VTI1B;RAB7A
small nuclear ribonucleoprotein complex (GO:0030532)	44246	0.0481361	0.152214	0	0	6.21849	18.8652	SNRPE;SNRPB
COPII-coated ER to Golgi transport vesicle (GO:0030134)	27485	0.0515469	0.15932	0	0	2.98576	8.85357	GRIA1;LMAN2L;LMAN2;VTI1B
endocytic vesicle (GO:0030139)	5/108	0.0517451	0.15932	0	0	2.57545	7.62702	STX12;HSP90AA1;DAB2IP;RAB7A;RAB11B
microtubule organizing center (GO:0005815)	15/507	0.0540533	0.164266	0	0	1.62956	4.75472	SPECC1;RABGAP1;EXOC7;CSNK1A1;SORBS1;HOOK3;TTC19;SIRT2;GNAI1;AHI1;PSMB5;PSMA1;RILPL1;RAB11FIP5;CCT4
mitochondrial inner membrane (GO:0005743)	11/341	0.0559487	0.166691	0	0	1.77689	5.12334	TIMM10B;NDUFA8;CHCHD3;NDUFB10;OPA1;RPS3;PHB;CYC1;SLC25A12;TTC19;TIMM50
recycling endosome membrane (GO:0055038)	17227	0.057138	0.166691	0	0	3.60866	10.329	RAP2B;VTI1B;RAB11B
U2 snRNP (GO:0005686)	44248	0.0577008	0.166691	0	0	5.56334	15.8694	SNRPE;SNRPB
U1 snRNP (GO:0005685)	44248	0.0577008	0.166691	0	0	5.56334	15.8694	SNRPE;SNRPB
telomerase holoenzyme complex (GO:0005697)	44249	0.0627092	0.176795	0	0	5.28491	14.6352	SNRPE;SNRPB
histone acetyltransferase complex (GO:0000123)	44249	0.0627092	0.176795	0	0	5.28491	14.6352	ELP1;ELP3
U5 snRNP (GO:0005682)	44250	0.0678587	0.189035	0	0	5.03299	13.5404	SNRPE;SNRPB
phagocytic vesicle (GO:0045335)	30407	0.0696024	0.191611	0	0	2.68231	7.14824	SNX3;STX12;RAB7A;RAB11B
nuclear body (GO:0016604)	17/618	0.0724649	0.197172	0	0	1.51172	3.96775	DDX17;CSNK1A1;DDX1;SRSF1;ACTN4;DGKZ;TIMM50;EFTUD2;ATXN2L;NAMPT;HNRNPA2B1;HABP4;SRSF2;SRSF3;TPP2;EIF3E;SQSTM1
cytoplasmic vesicle membrane (GO:0030659)	19784	0.0796154	0.211705	0	0	3.11224	7.87568	ITPR1;LNPEP;YWHAH
ER to Golgi transport vesicle membrane (GO:0012507)	19784	0.0796154	0.211705	0	0	3.11224	7.87568	GRIA1;SAR1A;VTI1B
U12-type spliceosomal complex (GO:0005689)	44254	0.0897309	0.235922	0	0	4.22685	10.1907	SNRPE;SNRPB
centrosome (GO:0005813)	13/461	0.0924329	0.238903	0	0	1.54593	3.68127	RABGAP1;EXOC7;CSNK1A1;SORBS1;HOOK3;TTC19;SIRT2;GNAI1;AHI1;PSMB5;PSMA1;RILPL1;CCT4
Golgi-associated vesicle (GO:0005798)	21245	0.0939278	0.238903	0	0	2.88531	6.82441	LMAN2L;COPB1;LMAN2
azurophil granule membrane (GO:0035577)	21245	0.0939278	0.238903	0	0	2.88531	6.82441	NCSTN;CPNE1;ARL8A
polysomal ribosome (GO:0042788)	44255	0.0954852	0.240253	0	0	4.06407	9.54562	FMR1;ZC3H15
nuclear matrix (GO:0016363)	21610	0.0976606	0.242685	0	0	2.83364	6.59177	PSMA6;HNRNPA2B1;CASK
U2-type spliceosomal complex (GO:0005684)	21976	0.101453	0.242685	0	0	2.78378	6.36975	EFTUD2;SNRPE;SNRPB
MICOS complex (GO:0061617)	44202	0.106823	0.242685	0	0	10.5495	23.5947	CHCHD3
AP-3 adaptor complex (GO:0030123)	44202	0.106823	0.242685	0	0	10.5495	23.5947	VPS41
gamma-secretase complex (GO:0070765)	44202	0.106823	0.242685	0	0	10.5495	23.5947	NCSTN
protein kinase complex (GO:1902911)	44202	0.106823	0.242685	0	0	10.5495	23.5947	SORBS1
platelet dense granule membrane (GO:0031088)	44202	0.106823	0.242685	0	0	10.5495	23.5947	ITPR1
zonula adherens (GO:0005915)	44202	0.106823	0.242685	0	0	10.5495	23.5947	SORBS1
Cul5-RING ubiquitin ligase complex (GO:0031466)	44202	0.106823	0.242685	0	0	10.5495	23.5947	RBX1
clathrin vesicle coat (GO:0030125)	44202	0.106823	0.242685	0	0	10.5495	23.5947	NCALD
vesicle coat (GO:0030120)	11355	0.113339	0.255012	0	0	3.64309	7.93237	SAR1A;COPB1
early phagosome (GO:0032009)	44203	0.123486	0.267552	0	0	8.79077	18.387	SNX3
flotillin complex (GO:0016600)	44203	0.123486	0.267552	0	0	8.79077	18.387	CORO1C
messenger ribonucleoprotein complex (GO:1990124)	44203	0.123486	0.267552	0	0	8.79077	18.387	FMR1
Gemini of coiled bodies (GO:0097504)	44203	0.123486	0.267552	0	0	8.79077	18.387	HABP4
integral component of mitochondrial inner membrane (GO:0031305)	12086	0.125678	0.269804	0	0	3.4077	7.06769	CHCHD3;MPC1
trans-Golgi network (GO:0005802)	6/185	0.133042	0.282088	0	0	1.77626	3.58288	ATXN2;CNST;M6PR;MYO18A;INPP5K;TMEM230
autolysosome (GO:0044754)	44204	0.139838	0.282088	0	0	7.53456	14.8225	SQSTM1
clathrin-sculpted gamma-aminobutyric acid transport vesicle membrane (GO:0061202)	44204	0.139838	0.282088	0	0	7.53456	14.8225	GAD2
chromatin silencing complex (GO:0005677)	44204	0.139838	0.282088	0	0	7.53456	14.8225	SIRT2
HFE-transferrin receptor complex (GO:1990712)	44204	0.139838	0.282088	0	0	7.53456	14.8225	TFRC
clathrin-sculpted gamma-aminobutyric acid transport vesicle (GO:0061200)	44204	0.139838	0.282088	0	0	7.53456	14.8225	GAD2
clathrin coat of trans-Golgi network vesicle (GO:0030130)	44204	0.139838	0.282088	0	0	7.53456	14.8225	NCALD
RISC complex (GO:0016442)	44205	0.155887	0.306534	0	0	6.59241	12.2528	DDX6
pseudopodium (GO:0031143)	44205	0.155887	0.306534	0	0	6.59241	12.2528	ACTN4
RNAi effector complex (GO:0031332)	44205	0.155887	0.306534	0	0	6.59241	12.2528	DDX6
azurophil granule (GO:0042582)	5/154	0.161293	0.314522	0	0	1.77615	3.24065	NCSTN;PTGES2;CPNE1;TUBB4B;ARL8A
spliceosomal complex (GO:0005681)	4/114	0.164242	0.317624	0	0	1.92333	3.47434	EFTUD2;HNRNPA2B1;SNRPE;SNRPB
anchored component of plasma membrane (GO:0046658)	14642	0.170981	0.327946	0	0	2.77898	4.90824	PRNP;THY1
nuclear ubiquitin ligase complex (GO:0000152)	15008	0.177661	0.336493	0	0	2.70758	4.67837	BRCC3;RBX1
nuclear periphery (GO:0034399)	28550	0.178313	0.336493	0	0	2.11373	3.64453	PSMA6;HNRNPA2B1;CASK
cell cortex region (GO:0099738)	44207	0.187093	0.34203	0	0	5.27339	8.83898	GNAI1
CD40 receptor complex (GO:0035631)	44207	0.187093	0.34203	0	0	5.27339	8.83898	TRAF3
axonal growth cone (GO:0044295)	44207	0.187093	0.34203	0	0	5.27339	8.83898	FMR1
spanning component of membrane (GO:0089717)	44207	0.187093	0.34203	0	0	5.27339	8.83898	NLGN1
clathrin-coated vesicle membrane (GO:0030665)	29646	0.192394	0.348993	0	0	2.03212	3.34937	TFRC;M6PR;GAD2
cell cortex part (GO:0044448)	16103	0.197925	0.353204	0	0	2.5138	4.07202	GNAI1;DBN1
chromosome, telomeric region (GO:0000781)	4/124	0.201433	0.353204	0	0	1.76215	2.82349	DDB1;PURA;HNRNPA2B1;PPP1CA
invadopodium (GO:0071437)	44208	0.202262	0.353204	0	0	4.79374	7.66131	ITGA3
node of Ranvier (GO:0033268)	44208	0.202262	0.353204	0	0	4.79374	7.66131	CNTN2
filopodium membrane (GO:0031527)	44208	0.202262	0.353204	0	0	4.79374	7.66131	ITGA3
mitotic spindle (GO:0072686)	30742	0.206741	0.358351	0	0	1.95656	3.0841	RPS3;MAP4;SIRT2
microtubule organizing center part (GO:0044450)	4/126	0.209157	0.359873	0	0	1.73308	2.7117	AHI1;EXOC7;HOOK3;SIRT2
cytoplasmic vesicle (GO:0031410)	6/215	0.214061	0.362949	0	0	1.51895	2.34146	PSMC5;TFRC;SORT1;COPB1;DAB2IP;VPS35
secondary lysosome (GO:0005767)	44209	0.217149	0.362949	0	0	4.39404	6.71045	SQSTM1
mitochondrial inner membrane presequence translocase complex (GO:0005744)	44209	0.217149	0.362949	0	0	4.39404	6.71045	TIMM50
COPII vesicle coat (GO:0030127)	44209	0.217149	0.362949	0	0	4.39404	6.71045	SAR1A
mitochondrial respiratory chain complex III (GO:0005750)	44210	0.231759	0.38269	0	0	4.05583	5.92986	CYC1
cytosolic small ribosomal subunit (GO:0022627)	17930	0.23223	0.38269	0	0	2.2458	3.27892	RPS3;RPS3A
platelet alpha granule (GO:0031091)	32933	0.236099	0.386344	0	0	1.82106	2.62871	TMX3;ACTN4;VTI1B
mitochondrial respiratory chain complex I (GO:0005747)	18660	0.246064	0.391745	0	0	2.15391	3.02014	NDUFA8;NDUFB10
keratin filament (GO:0045095)	44211	0.246096	0.391745	0	0	3.76594	5.27996	CSNK1A1
Cul2-RING ubiquitin ligase complex (GO:0031462)	44211	0.246096	0.391745	0	0	3.76594	5.27996	RBX1
COPI vesicle coat (GO:0030126)	44211	0.246096	0.391745	0	0	3.76594	5.27996	COPB1
cullin-RING ubiquitin ligase complex (GO:0031461)	5/181	0.249657	0.394149	0	0	1.50159	2.08371	DDB1;USP47;FBXO2;SKP1;RBX1
cortical cytoskeleton (GO:0030863)	19025	0.252992	0.394149	0	0	2.11073	2.90098	EEF1A1;DBN1
small ribosomal subunit (GO:0015935)	19391	0.259925	0.394149	0	0	2.06924	2.78801	RPS3;RPS3A
COPI-coated vesicle membrane (GO:0030663)	44212	0.260167	0.394149	0	0	3.5147	4.73229	COPB1
BLOC-1 complex (GO:0031083)	44212	0.260167	0.394149	0	0	3.5147	4.73229	STX12
T cell receptor complex (GO:0042101)	44212	0.260167	0.394149	0	0	3.5147	4.73229	ALCAM
pericentriolar material (GO:0000242)	44212	0.260167	0.394149	0	0	3.5147	4.73229	HOOK3
endoplasmic reticulum-Golgi intermediate compartment (GO:0005793)	1995-03-01	0.261082	0.394149	0	0	1.72165	2.31204	GRIA1;LMAN2L;LMAN2
actin filament (GO:0005884)	1955-02-01	0.273795	0.40321	0	0	1.99095	2.57903	TPM3;TPM1
mRNA cleavage and polyadenylation specificity factor complex (GO:0005847)	44213	0.273976	0.40321	0	0	3.29486	4.2659	CSNK1A1
platelet alpha granule membrane (GO:0031092)	44213	0.273976	0.40321	0	0	3.29486	4.2659	TMX3
acetylcholine-gated channel complex (GO:0005892)	44213	0.273976	0.40321	0	0	3.29486	4.2659	STXBP5
caveola (GO:0005901)	20486	0.280726	0.410562	0	0	1.95398	2.48229	CDH13;CORO1C
Golgi subcompartment (GO:0098791)	11/479	0.283373	0.411859	0	0	1.24397	1.56864	ATXN2;CNST;LMAN2L;SACM1L;LMAN2;COPB1;M6PR;MYO18A;INPP5K;ZDHHC17;TMEM230
U2-type prespliceosome (GO:0071004)	44214	0.287528	0.41277	0	0	3.10089	3.86505	SNRPB
endocytic vesicle lumen (GO:0071682)	44214	0.287528	0.41277	0	0	3.10089	3.86505	HSP90AA1
spliceosomal snRNP complex (GO:0097525)	1959-02-01	0.30148	0.430161	0	0	1.85085	2.21927	SNRPE;SNRPB
nuclear heterochromatin (GO:0005720)	44216	0.313879	0.444405	0	0	2.77419	3.21459	SIRT2
ficolin-1-rich granule membrane (GO:0101003)	22313	0.315262	0.444405	0	0	1.78793	2.0639	COPB1;ARL8A
nuclear chromosome, telomeric region (GO:0000784)	3/107	0.322081	0.446026	0	0	1.52206	1.72442	DDB1;PURA;PPP1CA
PML body (GO:0016605)	1962-02-01	0.32213	0.446026	0	0	1.75804	1.99151	EIF3E;SQSTM1
specific granule lumen (GO:0035580)	22678	0.32213	0.446026	0	0	1.75804	1.99151	PDXK;LRRC7
platelet dense granule (GO:0042827)	44217	0.326688	0.449677	0	0	2.63535	2.94829	ITPR1
lipid droplet (GO:0005811)	1964-02-01	0.335813	0.459534	0	0	1.70116	1.8563	RAB3GAP1;RAB7A
pre-autophagosomal structure (GO:0000407)	44219	0.351595	0.475187	0	0	2.39553	2.50398	STX12
prespliceosome (GO:0071010)	44219	0.351595	0.475187	0	0	2.39553	2.50398	SNRPB
vacuolar lumen (GO:0005775)	4/161	0.353344	0.475187	0	0	1.34431	1.39851	HSP90AA1;VCAN;PTGES2;TUBB4B
platelet alpha granule lumen (GO:0031093)	24504	0.356179	0.476262	0	0	1.62239	1.67483	ACTN4;VTI1B
mitochondrial outer membrane (GO:0005741)	3/115	0.362896	0.480826	0	0	1.41277	1.43203	OPA1;ACSL1;RAB11FIP5
endosome lumen (GO:0031904)	44220	0.363702	0.480826	0	0	2.29126	2.31743	LNPEP
nuclear inner membrane (GO:0005637)	44221	0.375583	0.490986	0	0	2.19568	2.15017	MATR3
centriolar satellite (GO:0034451)	44221	0.375583	0.490986	0	0	2.19568	2.15017	EXOC7
intermediate filament cytoskeleton (GO:0045111)	25965	0.382973	0.497864	0	0	1.52803	1.46659	NEFM;INA
contractile fiber (GO:0043292)	44222	0.387243	0.500635	0	0	2.10774	1.99962	PSMA6
tertiary granule membrane (GO:0070821)	26696	0.396191	0.506605	0	0	1.48483	1.37475	RAP2B;COPB1
early endosome membrane (GO:0031901)	26696	0.396191	0.506605	0	0	1.48483	1.37475	SNX3;VTI1B
myofibril (GO:0030016)	44223	0.398686	0.507024	0	0	2.02657	1.8636	PSMA6
cytosolic ribosome (GO:0022626)	3/124	0.408318	0.510214	0	0	1.30708	1.17076	RPS3;RPS3A;RPL26
catenin complex (GO:0016342)	44224	0.409915	0.510214	0	0	1.95141	1.74028	CDH13
brush border membrane (GO:0031526)	44224	0.409915	0.510214	0	0	1.95141	1.74028	SHANK2
rough endoplasmic reticulum (GO:0005791)	44224	0.409915	0.510214	0	0	1.95141	1.74028	RPN1
chromosomal region (GO:0098687)	27791	0.415769	0.513016	0	0	1.42442	1.2501	FMR1;HNRNPA2B1
sarcoplasmic reticulum (GO:0016529)	44225	0.420936	0.513016	0	0	1.88162	1.62812	ITPR1
intrinsic component of mitochondrial inner membrane (GO:0031304)	2021-01-29	0.420936	0.513016	0	0	1.88162	1.62812	MPC1
integral component of lumenal side of endoplasmic reticulum membrane (GO:0071556)	44225	0.420936	0.513016	0	0	1.88162	1.62812	CANX
spindle midzone (GO:0051233)	44226	0.431751	0.52347	0	0	1.81665	1.52581	ARL8A
endosomal part (GO:0044440)	44227	0.442365	0.528129	0	0	1.756	1.43223	VPS35
sarcoplasm (GO:0016528)	44227	0.442365	0.528129	0	0	1.756	1.43223	ITPR1
intercalated disc (GO:0014704)	44227	0.442365	0.528129	0	0	1.756	1.43223	YWHAH
spindle (GO:0005819)	4/186	0.458056	0.544086	0	0	1.15816	0.904254	RPS3;MAP4;ARL8A;SIRT2
precatalytic spliceosome (GO:0071011)	12055	0.463003	0.547185	0	0	1.64609	1.26752	SNRPE
lysosomal lumen (GO:0043202)	31444	0.478571	0.562742	0	0	1.2542	0.924285	HSP90AA1;VCAN
azurophil granule lumen (GO:0035578)	32905	0.502519	0.587947	0	0	1.19695	0.823646	PTGES2;TUBB4B
centriole (GO:0005814)	34731	0.531439	0.61869	0	0	1.13231	0.715808	AHI1;SIRT2
heterochromatin (GO:0000792)	14977	0.538212	0.623473	0	0	1.31633	0.815471	SIRT2
chromosome (GO:0005694)	35462	0.542682	0.625554	0	0	1.10836	0.677463	FMR1;SIRT2
specific granule (GO:0042581)	3/160	0.576183	0.660916	0	0	1.00551	0.554366	PDXK;RAP2B;LRRC7
cis-Golgi network (GO:0005801)	17168	0.587638	0.667511	0	0	1.14428	0.608352	HOOK3
endoplasmic reticulum-Golgi intermediate compartment membrane (GO:0033116)	17168	0.587638	0.667511	0	0	1.14428	0.608352	GRIA1
tertiary granule (GO:0070820)	3/164	0.592947	0.670288	0	0	0.980326	0.512367	RAP2B;COPB1;ARL8A
histone methyltransferase complex (GO:0035097)	17899	0.602912	0.678276	0	0	1.09649	0.554809	PRMT5
cortical actin cytoskeleton (GO:0030864)	18994	0.62477	0.699504	0	0	1.03184	0.485346	EEF1A1
mitochondrion (GO:0005739)	18/1026	0.63972	0.71283	0	0	0.936569	0.418389	NDUFA8;HSP90AB1;ACSL1;PTGES2;PHB;TTC19;TIMM50;CHCHD4;ILF3;CHCHD3;OPA1;MPC1;ERBB4;FKBP8;VPS35;CYC1;SLC25A12;RAB11FIP5
integral component of mitochondrial membrane (GO:0032592)	1956-01-01	0.65206	0.723138	0	0	0.956598	0.409059	MPC1
vacuole (GO:0005773)	22647	0.689328	0.760862	0	0	0.862242	0.320787	SQSTM1
autophagosome (GO:0005776)	23377	0.700843	0.76994	0	0	0.834784	0.296742	SQSTM1
fibrillar center (GO:0001650)	2/131	0.704715	0.770576	0	0	0.81481	0.285152	ARHGAP32;PAFAH1B2
cytosolic large ribosomal subunit (GO:0022625)	25204	0.727804	0.790072	0	0	0.773205	0.245666	RPL26
Cul3-RING ubiquitin ligase complex (GO:0031463)	1970-01-01	0.732898	0.790072	0	0	0.76196	0.236778	RBX1
actin-based cell projection (GO:0098858)	25569	0.732898	0.790072	0	0	0.76196	0.236778	IQGAP2
nuclear transcription factor complex (GO:0044798)	25934	0.737897	0.790072	0	0	0.751037	0.228279	TRIM28
large ribosomal subunit (GO:0015934)	1972-01-01	0.742802	0.790072	0	0	0.740421	0.220146	RPL26
bicellular tight junction (GO:0005923)	26299	0.742802	0.790072	0	0	0.740421	0.220146	RAP2B
nucleoplasm part (GO:0044451)	6/407	0.773715	0.819228	0	0	0.783844	0.201096	PRMT5;ELP1;TPP2;ELP3;EIF3E;ACTN4
nucleolar part (GO:0044452)	2/153	0.781891	0.824155	0	0	0.695311	0.171074	ARHGAP32;PAFAH1B2
trans-Golgi network membrane (GO:0032588)	31048	0.798832	0.838236	0	0	0.625416	0.140471	M6PR
chromatin (GO:0000785)	4/296	0.805354	0.841308	0	0	0.717786	0.155381	HNRNPK;NUCKS1;EIF3E;TMPO
specific granule membrane (GO:0035579)	33239	0.820409	0.853225	0	0	0.583542	0.115514	RAP2B
Golgi membrane (GO:0000139)	6/442	0.835587	0.865165	0	0	0.719609	0.129257	LMAN2L;SACM1L;LMAN2;COPB1;M6PR;ZDHHC17
Golgi lumen (GO:0005796)	35796	0.842681	0.868667	0	0	0.541237	0.0926416	VCAN
nuclear chromatin (GO:0000790)	3/253	0.853778	0.873501	0	0	0.628443	0.099347	HNRNPK;NUCKS1;SIRT2
lytic vacuole (GO:0000323)	2/183	0.858394	0.873501	0	0	0.579172	0.0884347	VPS35;RAB7A
nuclear chromosome part (GO:0044454)	5/392	0.85857	0.873501	0	0	0.675486	0.103003	DDB1;PURA;HNRNPK;NUCKS1;PPP1CA
integral component of endoplasmic reticulum membrane (GO:0030176)	1/128	0.910854	0.922683	0	0	0.412751	0.0385396	CANX
mitochondrial matrix (GO:0005759)	3/308	0.928944	0.936953	0	0	0.513655	0.0378597	PPA2;ERBB4;RPS3
RNA polymerase II transcription factor complex (GO:0090575)	1/147	0.937816	0.941841	0	0	0.358687	0.0230282	TRIM28
endoplasmic reticulum lumen (GO:0005788)	2/270	0.962852	0.962852	0	0	0.389407	0.014741	VCAN;CANX

## Sheet: Str_694_GO_BP
Term	Overlap	P-value	Adjusted P-value	Old P-value	Old Adjusted P-value	Odds Ratio	Combined Score	Genes
vesicle-mediated transport (GO:0016192)	68/410	2.13938e-27	5.77418e-24	0	0	6.02335	369.89	SNAP25;WIPF2;WIPF3;CLTC;AP2A1;FMN2;RPH3A;DPYSL2;CHMP1A;ERC1;RAC1;SNAP29;WASHC1;AGFG2;GIT1;AGFG1;TBC1D10B;BCAS3;STX7;TSC2;SYP;ARFGAP3;MAPK8IP3;ARFGAP1;DNM1;MAPK8IP1;RHOB;DNM2;STX1B;BIN1;VAMP1;AMPH;VAMP2;STX1A;NAPA;RAB1A;NAPB;STX16;AGAP2;ASAP1;AGAP3;CDC42;SNX4;ATP6V1H;RAB6A;YKT6;RAB6B;UVRAG;SYT3;SNAPIN;SYT1;RAB39B;RAB27B;HSPA2;SYT7;SYT17;EHD1;EHD3;EHD4;NECAP1;CDK5;RAB12;SPIRE1;UBE2O;VIPAS39;OSBPL1A…
protein transport (GO:0015031)	46/326	4.88719e-16	6.59527e-13	0	0	4.82361	170.055	NAPA;RAB3B;ATP6V1A;NAPB;RAB3C;RAB1A;LRSAM1;RAB3A;STX16;PDCD6;RAB3D;RAB1B;CLTC;AP2A1;DNAJC27;NAPG;SNX4;GGA3;ARFIP2;ATP6V1H;ATP6V1E1;RAB6A;RAB6B;ATP6V1D;ATP6V1C1;TBC1D10B;ATP6V0A1;ATP6V1F;SYNRG;STX7;AP3D1;RAB39B;RAB27B;ANK3;SCAMP1;ARFGAP3;DNM2;EHD1;STX1B;RAB12;ATP6V1B2;PICK1;VIPAS39;ATP6V0D1;STX1A;VAMP2
clathrin-dependent endocytosis (GO:0072583)	16/39	6.67716e-14	6.00722e-11	0	0	19.785	600.229	SYT1;CLTC;CLTB;CLTA;AP2A1;AP2B1;AP2A2;SYT17;INPP5F;CDK5;SYNJ1;DNAJC6;AP2M1;PACSIN1;SNCA;PICALM
ephrin receptor signaling pathway (GO:0048013)	20/82	4.02867e-12	2.45422e-09	0	0	9.2103	241.656	SDC2;ARPC1A;AP2A1;PTPN11;ARPC4;AP2B1;AP2A2;ACTB;RHOA;DNM1;ACTG1;CDC42;PAK1;FYN;RAC1;ANKS1A;PAK3;CRK;GIT1;AP2M1
cellular protein localization (GO:0034613)	40/327	4.54654e-12	2.45422e-09	0	0	4.05311	105.854	NAPA;RAB3B;PTPRU;NAPB;RAB3C;RAB1A;RAB3A;STX16;PDCD6;RAB3D;RAB1B;CLTC;AP2A1;DNAJC27;NAPG;GGA3;ARFIP2;MFN2;RAB6A;RAB6B;TBC1D10B;PACSIN1;SYNRG;STX7;AP3D1;RAB39B;ANK2;RAB27B;WIPI2;ARFGAP3;EHD1;STX1B;RAP2A;PACS2;HGS;RAB12;PICK1;VIPAS39;LAMTOR3;STX1A
Golgi vesicle transport (GO:0048193)	35/271	2.17784e-11	9.79664e-09	0	0	4.29162	105.36	ARF3;NAPA;ARF4;RAB1A;PEF1;PDCD6;RAB1B;KLC1;NAPG;NRBP2;SCFD1;KLC2;RAB6A;YKT6;RAB6B;UVRAG;SEC24A;TRAPPC5;ANK2;ANK3;SCAMP1;DYNLL1;ARFGAP3;AP3B2;DYNLL2;SPTB;SCAMP3;NRBP1;ARFGAP1;EHD3;RABIF;PICK1;GOPC;VAMP2;ARF5
intracellular protein transport (GO:0006886)	39/347	1.12213e-10	4.3266e-08	0	0	3.67266	84.1429	NAPA;RAB3B;NAPB;RAB3C;RAB1A;RAB3A;STX16;PDCD6;RAB3D;RAB1B;CLTC;KATNB1;AP2A1;DNAJC27;NAPG;GGA3;IPO9;ARFIP2;RAB6A;RAB6B;TNPO3;TBC1D10B;SYNRG;STX7;AP3D1;RAB39B;XPO7;TSC2;RAB27B;ARFGAP3;EHD1;CAMSAP3;STX1B;GIPC1;RAB12;PICK1;VIPAS39;STX1A;RAN
transmembrane receptor protein tyrosine kinase signaling pathway (GO:0007169)	42/396	1.34592e-10	4.54078e-08	0	0	3.44868	78.3844	CYFIP2;ATP6V1A;CYFIP1;NCKAP1;BMPR2;SDC2;ARPC1A;AP2A1;FGF1;AP2A2;ACTB;ACTG1;CDC42;PAK1;UBASH3B;ATP6V1H;FYN;RAC1;ANKS1A;ATP6V1E1;PAK3;ATP6V1D;AP2M1;ATP6V1C1;PAG1;GIT1;NCK1;ATP6V0A1;ATP6V1F;TSC2;ARPC4;PTPN11;AP2B1;RHOA;DNM1;APC;ATP6V1B2;RAPGEF2;PLCB1;ATP6V0D1;CRK;BCAR1
regulation of macroautophagy (GO:0016241)	20/116	3.01706e-09	9.04782e-07	0	0	5.93781	116.494	SH3GLB1;ATP6V1A;GPSM1;SCOC;PRKAA1;RAB1B;TSC2;TSC1;NRBP2;UCHL1;MAPK8;CDK5;ATP6V1B2;ATP6V1H;ATP6V1E1;ATP6V0D1;ATP6V1D;LAMTOR3;ATP6V1C1;ATP6V0A1
cellular protein modification process (GO:0006464)	72/1001	3.50224e-09	9.45253e-07	0	0	2.28982	44.5825	RET;PTPRU;GMFB;PIGT;RAB3A;PTPRS;GPAA1;UBE2D3;MPI;PARK7;PPP1CB;PSMD9;NRBP2;PSMD5;PSMD2;AKT3;MACROD2;PRKACB;ATG3;MAP2K1;PRKCE;PPP2R5A;PRKCA;WIPI2;RABGGTB;UCHL3;NRBP1;CKAP4;BCR;PICK1;PHPT1;BRSK1;RAB1A;PRKAA1;CTBP1;GPS1;RAB1B;SDC2;CUL2;CAMK2A;STK39;GLRX;MTMR6;PPP2CA;PPP2CB;PAK1;MAPK8;STK38L;FYN;PSMF1;ATG7;MARK2;MARK1;PTPRN2;BRAF;CDC42BPB;PTPRD;COPS3;MSRA;CDK5;RPS6KB1;WNK1;TAOK1;COPS2;WNK2;CAMK4;WNK3;…
regulation of vesicle-mediated transport (GO:0060627)	21/138	1.24085e-08	3.04459e-06	0	0	5.11765	93.1663	RAB3B;RAB3C;UVRAG;MAP2K1;RAB3A;SYT1;RAB3D;SNX12;HIP1R;TSC2;CPLX2;CPLX1;ARFGAP1;SCFD1;INPP5F;PACSIN2;AAK1;VAMP2;TBC1D10B;PACSIN1;PICALM
vesicle organization (GO:0016050)	20/127	1.51459e-08	3.40656e-06	0	0	5.32433	95.8674	SNAP25;SYT3;SYT1;STX16;STX7;SNX12;CORO1A;SYT7;DNM1;SYT17;RPH3A;STX1B;SNX4;VAMP1;SNAP29;YKT6;AP2M1;STX1A;VAMP2;PICALM
Ras protein signal transduction (GO:0007265)	27/223	1.75009e-08	3.63346e-06	0	0	3.94678	70.4934	RAB3B;CYFIP1;NCKAP1;RAB3C;RAB1A;RAB3A;RAB3D;RAB1B;PARK7;DNAJC27;EPS8;CDC42;PAK1;RAC1;PAK3;RAB6A;WASF1;RAB6B;RAB39B;RAB27B;RHOA;RHOB;RAP2A;ABI2;CDC42EP4;RAB12;RAPGEF2
transferrin transport (GO:0033572)	13455	2.20891e-08	3.97456e-06	0	0	12.4211	218.962	ATP6V1A;CLTC;ATP6V1B2;ATP6V1H;ATP6V1E1;ATP6V0D1;ATP6V1D;ATP6V1C1;ATP6V1F;ATP6V0A1;DNM2
ferric iron transport (GO:0015682)	13455	2.20891e-08	3.97456e-06	0	0	12.4211	218.962	ATP6V1A;CLTC;ATP6V1B2;ATP6V1H;ATP6V1E1;ATP6V0D1;ATP6V1D;ATP6V1C1;ATP6V1F;ATP6V0A1;DNM2
endosomal transport (GO:0016197)	27/229	3.08075e-08	5.19684e-06	0	0	3.82834	66.2131	TSG101;STX16;CLTC;AP2A1;SNX4;ERC1;RAB6A;YKT6;WASHC1;RAB6B;TBC1D10B;SNAPIN;VPS13C;VPS37A;STAM;RHOB;EHD1;EHD3;EHD4;BIN1;HGS;RAB12;CHMP4B;UBE2O;VIPAS39;STAM2;PICALM
protein localization to membrane (GO:0072657)	22/160	3.73353e-08	5.92754e-06	0	0	4.54727	77.7735	SH3GLB1;DPP10;STXBP1;AP3D1;NRXN2;ANK2;BRAF;ANK3;LIN7B;CACNB3;EHD3;RAP2A;PACS2;HGS;PACS1;WNK3;FLOT2;RAPGEF2;PICK1;SCN3B;PACSIN1;CLASP2
macroautophagy (GO:0016236)	18/110	4.30705e-08	6.45819e-06	0	0	5.56104	94.3176	ATG3;PRKAA1;TSG101;VPS37A;STAM;WIPI2;DYNLL1;DYNLL2;VMP1;HGS;CHMP4B;PLAA;MFN2;STAM2;ATG7;SNAP29;TECPR1;UBXN6
axonogenesis (GO:0007409)	26/223	6.95674e-08	9.66323e-06	0	0	3.77545	62.2231	CYFIP2;RET;ROBO2;CYFIP1;BRSK1;RAB3A;ROBO1;KIF5B;FYN;APBB1;PAK3;LGI1;USP9X;DCC;RANBP9;PRKCA;PTPN11;ANK3;GAB2;SPTB;ENAH;GAP43;DAB1;CDK5;TAOK2;EVL
phagosome maturation (GO:0090382)	11963	7.66271e-08	9.66323e-06	0	0	12.815	209.965	ATP6V1A;ATP6V1B2;ATP6V1H;ATP6V1E1;ATP6V0D1;CORO1A;ATP6V1D;ATP6V1C1;ATP6V1F;ATP6V0A1
neuron projection development (GO:0031175)	22/167	8.14875e-08	9.66323e-06	0	0	4.32617	70.6153	LGI1;NCKAP1;GPM6A;SNAPIN;CTNND2;STMN2;NYAP2;DNM2;EHD1;CDC42;GAP43;PAK1;ATCAY;CDK5;CDH11;TBC1D24;RAPGEF2;RAC1;MAPT;PAK3;SH3GL2;PACSIN1
glycolytic process through glucose-6-phosphate (GO:0061620)	44464	8.59289e-08	9.66323e-06	0	0	15.8403	257.718	GPI;PKM;PGAM1;PGK1;ENO1;ENO2;ALDOA;PGM2L1;PFKP
canonical glycolysis (GO:0061621)	44464	8.59289e-08	9.66323e-06	0	0	15.8403	257.718	GPI;PKM;PGAM1;PGK1;ENO1;ENO2;ALDOA;PGM2L1;PFKP
glucose catabolic process to pyruvate (GO:0061718)	44464	8.59289e-08	9.66323e-06	0	0	15.8403	257.718	GPI;PKM;PGAM1;PGK1;ENO1;ENO2;ALDOA;PGM2L1;PFKP
retrograde vesicle-mediated transport, Golgi to ER (GO:0006890)	15/80	8.95075e-08	9.66323e-06	0	0	6.53937	106.127	ARF3;NAPA;ARF4;RAB1A;UVRAG;RAB1B;ARFGAP3;KLC1;ARFGAP1;SCFD1;KLC2;PICK1;RAB6A;RAB6B;ARF5
vascular endothelial growth factor receptor signaling pathway (GO:0048010)	14/70	1.0302e-07	1.06502e-05	0	0	7.07721	113.861	CYFIP2;CYFIP1;NCKAP1;BMPR2;PDCD6;ACTB;RHOA;ACTG1;CDC42;FYN;RAC1;CRK;BCAR1;NCK1
intracellular pH reduction (GO:0051452)	12328	1.06541e-07	1.06502e-05	0	0	12.2572	196.786	ATP6V1A;DMXL2;ATP6V1B2;ATP6V1H;ATP6V1E1;ATP6V0D1;ATP6V1D;ATP6V1C1;ATP6V1F;ATP6V0A1
organelle membrane fusion (GO:0090174)	14/71	1.24275e-07	1.19792e-05	0	0	6.95268	110.553	SNAP25;SYT3;SYT1;STX16;STX7;SYT7;SYT17;RPH3A;STX1B;VAMP1;SNAP29;YKT6;STX1A;VAMP2
phagosome acidification (GO:0090383)	44466	1.85218e-07	1.72381e-05	0	0	14.0788	218.246	ATP6V1A;ATP6V1B2;ATP6V1H;ATP6V1E1;ATP6V0D1;ATP6V1D;ATP6V1C1;ATP6V1F;ATP6V0A1
positive regulation of neuron projection development (GO:0010976)	16/97	2.15542e-07	1.93916e-05	0	0	5.60108	85.9772	RET;ROBO2;NDRG4;SYT3;SYT1;STMN2;RHOA;ROBO1;SYT17;RIMS1;DPYSL3;PLAA;PLXNA1;RAPGEF2;MARK2;PACSIN1
regulation of defense response to virus by virus (GO:0050690)	44467	2.64581e-07	2.24579e-05	0	0	13.3371	201.993	PACS1;ATP6V1H;AP2A1;FYN;RAC1;AP2B1;AP2A2;AP2M1;AP1M1
vesicle-mediated transport in synapse (GO:0099003)	13424	2.66266e-07	2.24579e-05	0	0	10.8412	164.123	SNAPIN;SYT1;CDK5;SYNJ1;KIF5B;AP3D1;PACSIN1;SNCA;SYT17;DNM2
low-density lipoprotein particle receptor catabolic process (GO:0032802)	44357	3.18495e-07	2.52828e-05	0	0	42.0828	629.545	CLTC;CLTA;AP2A1;AP2B1;AP2A2;AP2M1
regulation of Arp2/3 complex-mediated actin nucleation (GO:0034315)	44357	3.18495e-07	2.52828e-05	0	0	42.0828	629.545	CYFIP1;NCKAP1;ABI2;PICK1;ARFIP2;WASF1
synaptic vesicle endocytosis (GO:0048488)	44468	3.71878e-07	2.86771e-05	0	0	12.6696	187.57	SYT1;CDK5;SYNJ1;DNAJC6;DNM1;PACSIN1;SNCA;SYT17;DNM2
regulation of ARF protein signal transduction (GO:0032012)	44469	5.14969e-07	3.86084e-05	0	0	12.0657	174.701	AGAP2;ASAP1;AGAP3;ARFGAP3;SMAP1;AGFG2;GIT1;ARFGAP1;AGFG1
positive regulation of plasma membrane bounded cell projection assembly (GO:0120034)	13/69	6.09552e-07	4.44644e-05	0	0	6.56204	93.9064	NCKAP1;BCAS3;GPM6A;CARMIL2;EPS8;CDC42;APC;CDC42EP4;DPYSL3;FSCN1;RAC1;PFN1;WASHC1
low-density lipoprotein receptor particle metabolic process (GO:0032799)	44358	6.80078e-07	4.83034e-05	0	0	33.6645	478.072	CLTC;CLTA;AP2A1;AP2B1;AP2A2;AP2M1
phosphorylation (GO:0016310)	34/386	7.05046e-07	4.87928e-05	0	0	2.77392	39.2925	RET;BRSK1;PRKAA1;GMFB;CTBP1;CAMK2A;STK39;NRBP2;PAK1;MAPK8;AKT3;PGK1;STK38L;FYN;PRKACB;MARK2;MARK1;MAP2K1;PRKCE;PRKCA;BRAF;CDC42BPB;NRBP1;BCR;CDK5;RPS6KB1;WNK1;TAOK1;WNK2;CAMK4;WNK3;AAK1;PICK1;CDK14
vesicle fusion (GO:0006906)	15/94	7.99535e-07	5.24168e-05	0	0	5.37658	75.483	SNAP25;UVRAG;SYT3;SYT1;STX16;STX7;SYT7;SYT17;RPH3A;STX1B;VAMP1;SNAP29;YKT6;STX1A;VAMP2
neutrophil degranulation (GO:0043312)	39/479	8.05253e-07	5.24168e-05	0	0	2.553	35.8239	CYFIP1;GPI;SNAP25;RAB3A;RAB3D;FAF2;SLC2A3;PYGL;AP2A2;SYNGR1;CYB5R3;PSMD2;COTL1;LTA4H;RAC1;RAB6A;ATG7;SNAP29;ATP6V1D;HMOX2;AP1M1;ATP6V0A1;VAT1;PTPRN2;PGAM1;PDAP1;MIF;SCAMP1;DYNLL1;RHOA;CKAP4;SERPINB6;ACLY;PKM;DNAJC5;CYSTM1;CD47;ALDOA;LAMTOR3
regulation of synaptic vesicle exocytosis (GO:2000300)	44394	8.43543e-07	5.24168e-05	0	0	19.6611	274.974	NAPA;NAPB;RIMS1;STX1B;RAB3A;STXBP1;SYN1
synaptic vesicle transport (GO:0048489)	44394	8.43543e-07	5.24168e-05	0	0	19.6611	274.974	SNAPIN;RAB3A;CDK5;SYNJ1;KIF5B;SYT7;DNM2
actin filament organization (GO:0007015)	17/120	8.54517e-07	5.24168e-05	0	0	4.68158	65.4144	CARMIL2;DMTN;HIP1R;ARPC4;RHOA;CD2AP;RHOB;EPS8;CDC42;ABI2;DPYSL3;PLS3;EVL;RAC1;ALDOA;BCAR1;CAP2
receptor catabolic process (GO:0032801)	44432	9.06832e-07	5.39479e-05	0	0	14.0598	195.618	SH3GLB1;UVRAG;CLTC;CLTA;AP2A1;AP2B1;AP2A2;AP2M1
regulation of cytoskeleton organization (GO:0051493)	15/95	9.19453e-07	5.39479e-05	0	0	5.30909	73.7937	DMTN;STMN2;HIP1R;TSC1;CORO1A;RHOA;RHOB;CDC42;CAMSAP3;TAOK1;TAOK2;FSCN1;MAPT;CRK;MARK2
neutrophil activation involved in immune response (GO:0002283)	39/483	9.90273e-07	5.68669e-05	0	0	2.52946	34.9705	CYFIP1;GPI;SNAP25;RAB3A;RAB3D;FAF2;SLC2A3;PYGL;AP2A2;SYNGR1;CYB5R3;PSMD2;COTL1;LTA4H;RAC1;RAB6A;ATG7;SNAP29;ATP6V1D;HMOX2;AP1M1;ATP6V0A1;VAT1;PTPRN2;PGAM1;PDAP1;MIF;SCAMP1;DYNLL1;RHOA;CKAP4;SERPINB6;ACLY;PKM;DNAJC5;CYSTM1;CD47;ALDOA;LAMTOR3
regulation of exocytosis (GO:0017157)	18933	1.08977e-06	6.12769e-05	0	0	7.75717	106.502	RAB3B;RAB3C;RAB3A;SYT1;RAB3D;RAB27B;CPLX2;CPLX1;VAMP2;SNCA;CLASP2
antigen processing and presentation of exogenous peptide antigen via MHC class II (GO:0019886)	15/97	1.20892e-06	6.42613e-05	0	0	5.17907	70.5688	SEC24A;CLTC;CLTA;AP2A1;AP2B1;KLC1;DYNLL1;AP2A2;DYNLL2;DNM2;KLC2;OSBPL1A;SH3GL2;AP2M1;AP1M1
antigen processing and presentation of exogenous peptide antigen (GO:0002478)	15/97	1.20892e-06	6.42613e-05	0	0	5.17907	70.5688	SEC24A;CLTC;CLTA;AP2A1;AP2B1;KLC1;DYNLL1;AP2A2;DYNLL2;DNM2;KLC2;OSBPL1A;SH3GL2;AP2M1;AP1M1
neutrophil mediated immunity (GO:0002446)	39/487	1.21427e-06	6.42613e-05	0	0	2.50635	34.1398	CYFIP1;GPI;SNAP25;RAB3A;RAB3D;FAF2;SLC2A3;PYGL;AP2A2;SYNGR1;CYB5R3;PSMD2;COTL1;LTA4H;RAC1;RAB6A;ATG7;SNAP29;ATP6V1D;HMOX2;AP1M1;ATP6V0A1;VAT1;PTPRN2;PGAM1;PDAP1;MIF;SCAMP1;DYNLL1;RHOA;CKAP4;SERPINB6;ACLY;PKM;DNAJC5;CYSTM1;CD47;ALDOA;LAMTOR3
protein phosphorylation (GO:0006468)	38/470	1.3212e-06	6.85752e-05	0	0	2.53081	34.2595	RET;BRSK1;PRKAA1;GMFB;CTBP1;CAMK2A;STK39;NRBP2;PAK1;MAPK8;SLK;AKT3;STK38L;FYN;ERC1;PRKACB;STK32C;MARK2;MARK1;MAP2K1;PRKCE;PRKCA;BRAF;CDC42BPB;NRBP1;BCR;ABI2;CDK5;RPS6KB1;WNK1;TAOK1;WNK2;CAMK4;TAOK2;WNK3;AAK1;PICK1;CDK14
antigen processing and presentation of peptide antigen via MHC class II (GO:0002495)	15/98	1.38232e-06	7.03939e-05	0	0	5.1164	69.0292	SEC24A;CLTC;CLTA;AP2A1;AP2B1;KLC1;DYNLL1;AP2A2;DYNLL2;DNM2;KLC2;OSBPL1A;SH3GL2;AP2M1;AP1M1
regulation of actin cytoskeleton organization (GO:0032956)	13/75	1.64902e-06	8.1805e-05	0	0	5.92516	78.8954	DMTN;HIP1R;TSC1;CORO1A;RHOA;RHOB;EPS8;CDC42;TAOK1;TAOK2;FSCN1;PHPT1;CRK
positive regulation of exocytosis (GO:0045921)	12663	1.66702e-06	8.1805e-05	0	0	10.1331	134.815	SMPD3;TSG101;RAB3A;PDCD6IP;HGS;RAB3D;RAB27B;STAM;CLASP2
inorganic cation transmembrane transport (GO:0098662)	18/140	1.74219e-06	8.39674e-05	0	0	4.18702	55.5214	SLC12A2;TRPV2;ATP2B4;CACNA1A;ATP2A2;SLC8A1;SLC8A2;SLC9A1;FKBP1A;SCN8A;ATP6V1B2;ATP6V1E1;ATP6V0D1;SCN3B;SCN2A;ATP6V1C1;SCN1A;ATP6V1F
non-canonical Wnt signaling pathway (GO:0035567)	17/127	1.91458e-06	8.9629e-05	0	0	4.38206	57.6943	CLTC;CAMK2A;AP2A1;AP2B1;AP2A2;RHOA;CDC42;PSMD9;PPP3R1;PSMD5;PSMD2;DVL2;PSMF1;RAC1;PFN1;PLCB1;AP2M1
Wnt signaling pathway, planar cell polarity pathway (GO:0060071)	14/88	1.92691e-06	8.9629e-05	0	0	5.35072	70.4132	CLTC;AP2A1;AP2B1;AP2A2;RHOA;CDC42;PSMD9;PSMD5;PSMD2;DVL2;RAC1;PSMF1;PFN1;AP2M1
membrane fusion (GO:0061025)	20029	1.99249e-06	8.9629e-05	0	0	7.21485	94.703	NAPA;RIMS1;NAPB;RABIF;MFN2;SNAP29;ATG7;DNM1;VAMP2;NAPG;DNM2
negative regulation of supramolecular fiber organization (GO:1902904)	20029	1.99249e-06	8.9629e-05	0	0	7.21485	94.703	CAMSAP3;APC;STMN2;HIP1R;KATNB1;PFN1;CORO1A;ARPIN;KANK4;SNCA;CLASP2
regulation of establishment of planar polarity (GO:0090175)	14/89	2.21465e-06	9.79891e-05	0	0	5.2791	68.7361	CLTC;AP2A1;AP2B1;AP2A2;RHOA;CDC42;PSMD9;PSMD5;PSMD2;DVL2;RAC1;PSMF1;PFN1;AP2M1
positive regulation of actin nucleation (GO:0051127)	44360	2.37971e-06	0.000103594	0	0	24.0436	311.329	CYFIP1;NCKAP1;ABI2;WIPF2;WIPF3;WASF1
axon guidance (GO:0007411)	19/158	2.50883e-06	0.000107482	0	0	3.88141	50.0534	CYFIP2;RET;ROBO2;LGI1;CYFIP1;DCC;RANBP9;PRKCA;PTPN11;GAB2;SPTB;ROBO1;ENAH;GAP43;DAB1;KIF5B;PLXNA1;EVL;FYN
protein localization to cell periphery (GO:1990778)	16/117	2.87395e-06	0.000119001	0	0	4.48728	57.2569	DPP10;STXBP1;ANK2;ANK3;LIN7B;CACNB3;EHD3;RAP2A;PACS2;PACS1;WNK3;FLOT2;RAPGEF2;SCN3B;PACSIN1;CLASP2
regulation of protein localization to plasma membrane (GO:1903076)	24807	2.88897e-06	0.000119001	0	0	6.15868	78.5515	DPP10;CDK5;KIF5B;PRKCE;CLTC;STX7;WNK3;AKR1B1;PPP2R5A;PTPN9;AP2M1;PICALM
regulation of secretion by cell (GO:1903530)	20760	2.90999e-06	0.000119001	0	0	6.89348	87.8736	RAB3B;RAB3C;RIMS1;RAB3A;SYT1;RAB3D;CAMK2A;CPLX2;CPLX1;SYN1;VAMP2
neuron projection morphogenesis (GO:0048812)	19/163	3.99886e-06	0.000161088	0	0	3.74566	46.5567	NCKAP1;BRSK1;GPM6A;RAB3A;DCC;CTNND2;SDC2;ANK3;NYAP2;DNM2;CDC42;IMPACT;PAK1;CDK5;TAOK2;RAC1;APBB1;PAK3;PACSIN1
synaptic vesicle recycling (GO:0036465)	44437	4.53766e-06	0.000180105	0	0	10.7094	131.759	RAB3A;SYT1;CDK5;SYNJ1;SYT7;PACSIN1;SNCA;SYT17
Rab protein signal transduction (GO:0032482)	25903	4.6604e-06	0.000182296	0	0	5.83922	71.6846	RAB3B;RAB3C;RAB1A;RAB3A;RAB3D;RAB1B;RAB12;RAB39B;RAB27B;RAB6A;DNAJC27;RAB6B
endocytosis (GO:0006897)	25/263	5.53819e-06	0.000213537	0	0	2.99393	36.2381	RAB1A;LRSAM1;WIPF2;WIPF3;CLTC;AP2A1;CORO1A;CDC42;SNX4;DPYSL2;PACSIN2;ATP6V1H;RAC1;WASF1;HIP1R;TSC2;SYP;SYT7;DNM1;DNM2;EHD1;BIN1;DNAJC6;AMPH;PICALM
multivesicular body assembly (GO:0036258)	44438	6.00046e-06	0.000226958	0	0	10.2221	122.907	TSG101;PDCD6IP;HGS;CHMP1A;CHMP4B;VPS37A;STAM;STAM2
cellular response to insulin stimulus (GO:0032869)	15/110	6.05445e-06	0.000226958	0	0	4.46733	53.6737	ATP6V1A;SYAP1;PKM;APC;RPS6KB1;ATP6V1B2;ATP6V1H;ATP6V1E1;ATP6V0D1;ATP6V1D;ATP6V1C1;VAMP2;BCAR1;ATP6V1F;ATP6V0A1
transport along microtubule (GO:0010970)	44362	6.53929e-06	0.000241774	0	0	18.6986	223.218	CDC42;CAMSAP3;ARHGAP21;APBA1;DYNLL1;DYNLL2
multivesicular body organization (GO:0036257)	44439	7.84294e-06	0.000286055	0	0	9.77716	114.939	TSG101;PDCD6IP;HGS;CHMP1A;CHMP4B;VPS37A;STAM;STAM2
regulation of actin filament-based process (GO:0032970)	22951	8.22227e-06	0.000294962	0	0	6.08058	71.1955	CDC42;DMTN;TAOK1;TAOK2;FSCN1;HIP1R;TSC1;CRK;CORO1A;RHOA;RHOB
positive regulation of actin filament polymerization (GO:0030838)	18902	8.36479e-06	0.000294962	0	0	6.86956	80.3153	NCKAP1;CARMIL2;WIPF2;PRKCE;CDC42EP4;WIPF3;ARPC4;RAC1;PFN1;NCK1
organelle assembly (GO:0070925)	31/376	8.415e-06	0.000294962	0	0	2.56975	30.0288	RAB1A;TSG101;ARL6;RAB1B;ASAP1;CORO1A;ABLIM1;ABLIM3;CHMP1A;SYNPO;ATG7;ATP6V1D;SNAP29;IQCB1;ATG3;PDCD6IP;STX7;OCRL;VPS37A;STAM;WIPI2;DYNLL1;DYNLL2;EHD1;EHD3;PACS2;HGS;CHMP4B;MAPT;ATP6V0D1;STAM2
glycolytic process (GO:0006096)	44400	8.86356e-06	0.00030282	0	0	12.2844	142.911	PFKFB2;LDHA;PKM;PGAM1;PGK1;ENO2;ALDOA
positive regulation of ion transmembrane transporter activity (GO:0032414)	44400	8.86356e-06	0.00030282	0	0	12.2844	142.911	WNK1;WNK2;WNK3;STK39;GLRX;ANK2;ANK3
chemical synaptic transmission (GO:0007268)	26/289	9.76766e-06	0.000329536	0	0	2.81823	32.5123	NAPA;NAPB;SNAP25;CHRNA4;CACNA1B;CACNA1A;NRXN2;SLC6A1;CPLX1;GRM2;SLC12A6;BSN;SLC18A2;SYT1;GABRG2;SYN1;CACNB1;CACNB3;CACNB4;TH;SYPL1;CDK5;GIPC1;APBA1;AMPH;APBA2
regulation of actin nucleation (GO:0051125)	44363	1.0156e-05	0.000338158	0	0	16.8279	193.478	WIPF2;WIPF3;PICK1;ARFIP2;CORO1A;ARPIN
nervous system development (GO:0007399)	35/455	1.02738e-05	0.000338158	0	0	2.38821	27.4308	ROBO2;NCKAP1;ACHE;GPM6A;NUMBL;GMFB;NCAN;CAMK2A;ADAM22;NRXN2;GBA2;PTS;ROBO1;DPYSL2;FYN;BPNT1;NDUFV2;SH3GL2;SH3GL1;LGI1;SLC4A10;WWP1;NAV1;CDK5;TAOK1;COPS2;SCN8A;TAOK2;CSPG5;EVL;APBA1;TAGLN3;DAGLB;PAFAH1B3;APBA2
positive regulation of protein polymerization (GO:0032273)	23682	1.12952e-05	0.000362812	0	0	5.85052	66.6441	NCKAP1;PAK1;TPPP3;PRKCE;CDC42EP4;SLAIN2;RAC1;MAPT;TPPP;PFN1;NCK1
anterograde trans-synaptic signaling (GO:0098916)	23/240	1.14018e-05	0.000362812	0	0	3.01529	34.3192	SNAP25;SYT1;CHRNA4;CACNA1B;CACNA1A;NRXN2;SLC6A1;CPLX1;GABRG2;SYN1;CACNB1;GRM2;CACNB3;CACNB4;SYPL1;CDK5;GIPC1;APBA1;AMPH;SLC12A6;BSN;APBA2;SLC18A2
protein localization to plasma membrane (GO:0072659)	16/130	1.14261e-05	0.000362812	0	0	3.97288	45.2098	DPP10;STXBP1;ANK2;ANK3;CACNB3;EHD3;RAP2A;PACS2;PACS1;WNK3;FLOT2;RAPGEF2;SCN3B;VAMP2;PACSIN1;CLASP2
ATP generation from ADP (GO:0006757)	44401	1.21399e-05	0.000380995	0	0	11.5612	130.861	PFKFB2;LDHA;PKM;PGAM1;PGK1;ENO2;ALDOA
regulation of Ras protein signal transduction (GO:0046578)	13/90	1.32819e-05	0.000412043	0	0	4.76719	53.5313	AGAP2;ASAP1;AGAP3;ARFGAP3;ARFGAP1;EPS8;MADD;MFN2;OGT;SMAP1;AGFG2;GIT1;AGFG1
membrane depolarization (GO:0051899)	15950	1.35537e-05	0.000415698	0	0	7.44732	83.4759	CACNB3;CACNB4;CHRNA4;SCN8A;CACNA1B;CACNA1A;SCN3B;SCN2A;SCN1A
action potential (GO:0001508)	19998	1.42635e-05	0.000427646	0	0	6.40019	71.412	CHRNA4;SCN8A;KCNA2;CACNA1B;CACNA1A;ANK3;SRI;SCN3B;SCN2A;SCN1A
plasma membrane bounded cell projection organization (GO:0120036)	15/118	1.44186e-05	0.000427646	0	0	4.11864	45.9104	LGI1;CYFIP1;GPM6A;SNAPIN;STMN2;EHD1;ATCAY;CDK5;CDH11;TBC1D24;ARFIP2;RAPGEF2;RAC1;MAPT;SH3GL2
calcium ion transport (GO:0006816)	15/118	1.44186e-05	0.000427646	0	0	4.11864	45.9104	CHRNA4;CAMK2A;CACNA1B;TRPV2;ATP2B4;CACNA1A;ATP2A2;ANK2;SLC3A2;ATP2B2;SLC8A1;SLC8A2;FKBP1A;CACNB3;FYN
virion assembly (GO:0019068)	44364	1.52356e-05	0.000443772	0	0	15.2973	169.676	RAB1A;LRSAM1;TSG101;PDCD6IP;RAB1B;CHMP4B
Fc-gamma receptor signaling pathway involved in phagocytosis (GO:0038096)	16/133	1.52912e-05	0.000443772	0	0	3.87041	42.916	CYFIP2;CYFIP1;NCKAP1;WIPF2;PRKCE;WIPF3;ARPC1A;ARPC4;ACTB;ACTG1;CDC42;PAK1;FYN;RAC1;CRK;NCK1
regulation of focal adhesion assembly (GO:0051893)	16316	1.65189e-05	0.000474305	0	0	7.23416	79.6554	CAMSAP3;BCAS3;SLK;DMTN;TSC1;RAC1;RHOA;SLC9A1;CLASP2
Fc-gamma receptor signaling pathway (GO:0038094)	16/134	1.68162e-05	0.000475646	0	0	3.83741	42.1853	CYFIP2;CYFIP1;NCKAP1;WIPF2;PRKCE;WIPF3;ARPC1A;ARPC4;ACTB;ACTG1;CDC42;PAK1;FYN;RAC1;CRK;NCK1
ER to Golgi vesicle-mediated transport (GO:0006888)	19/180	1.69181e-05	0.000475646	0	0	3.34718	36.7759	NAPA;ARF4;RAB1A;SEC24A;PEF1;PDCD6;RAB1B;TRAPPC5;ANK2;ANK3;ARFGAP3;DYNLL1;SPTB;DYNLL2;NRBP1;ARFGAP1;NRBP2;GOPC;YKT6
insulin receptor signaling pathway (GO:0008286)	24777	1.77623e-05	0.000494231	0	0	5.53624	60.5578	ATP6V1A;APC;ATP6V1B2;ATP6V1H;ATP6V1E1;ATP6V0D1;ATP6V1D;ATP6V1C1;BCAR1;ATP6V1F;ATP6V0A1
Fc receptor mediated stimulatory signaling pathway (GO:0002431)	16/135	1.8475e-05	0.000508816	0	0	3.80496	41.4706	CYFIP2;CYFIP1;NCKAP1;WIPF2;PRKCE;WIPF3;ARPC1A;ARPC4;ACTB;ACTG1;CDC42;PAK1;FYN;RAC1;CRK;NCK1
regulation of short-term neuronal synaptic plasticity (GO:0048172)	44327	1.92506e-05	0.00051443	0	0	23.343	253.458	SYNGR1;RAB3A;SYP;PPFIA3;SLC8A2
establishment of synaptic vesicle localization (GO:0097480)	44327	1.92506e-05	0.00051443	0	0	23.343	253.458	SNAPIN;CDK5;SYNJ1;KIF5B;DNM2
positive regulation of sodium ion transmembrane transporter activity (GO:2000651)	44327	1.92506e-05	0.00051443	0	0	23.343	253.458	WNK2;WNK3;GLRX;ANK3;SLC9A1
positive regulation of sodium ion transmembrane transport (GO:1902307)	44292	2.03917e-05	0.00053958	0	0	55.9536	604.321	WNK2;WNK3;GLRX;ANK3
regulation of endocytosis (GO:0030100)	25508	2.36728e-05	0.000620319	0	0	5.34478	56.9282	LRSAM1;SNX12;PACSIN2;HIP1R;AAK1;TSC2;ARFGAP1;SYT7;PACSIN1;SNCA;PICALM
pyruvate metabolic process (GO:0006090)	17046	2.41291e-05	0.000626197	0	0	6.84241	72.7492	PFKFB2;SRR;LDHA;PKM;PGAM1;PGK1;ME3;ENO2;ALDOA
modulation of chemical synaptic transmission (GO:0050804)	30286	2.48272e-05	0.000638177	0	0	4.83519	51.2703	LGI1;GRM2;RIMS1;STX1B;SYT1;CDK5;CAMK2A;EIF4EBP2;CPLX2;CPLX1;SYN1;CNTNAP4
post-Golgi vesicle-mediated transport (GO:0006892)	21459	2.74484e-05	0.000698899	0	0	5.86562	61.6078	SCFD1;RABIF;VPS13C;AP3D1;AP2A1;GOPC;SCAMP1;AP3B2;SCAMP3;VAMP2
ion transport (GO:0006811)	25/289	2.79762e-05	0.000705681	0	0	2.6954	28.2589	ATP6V1A;SLC20A2;TTYH1;CHRNA4;ATP2A2;SLC8A1;SLC8A2;SLC9A1;LASP1;ATP6V1H;SLC12A6;ATP6V1E1;ATP6V1D;ATP6V1C1;ATP6V0A1;ATP6V1F;SLC12A2;ATP2B4;WWP1;ATP2B2;GABRG2;WNK1;ATP6V1B2;FXYD7;ATP6V0D1
protein dephosphorylation (GO:0006470)	15/125	2.88837e-05	0.000721697	0	0	3.85513	40.2948	PTPRU;PTPRN2;PTPRS;DUSP3;PPP2R5A;PTPN11;MTMR6;PPP1CB;PTPRD;PPP2CA;PPP2CB;UBASH3B;PTPN9;PHPT1;NCK1
regulation of cellular component organization (GO:0051128)	16/140	2.9146e-05	0.000721697	0	0	3.65059	38.1238	SNX12;HIP1R;TSC2;PTPN11;PARK7;ARFGAP1;CAMSAP3;STRIP1;TAOK2;PACSIN2;AAK1;STK38L;RAPGEF2;BCAR1;PACSIN1;PICALM
Rac protein signal transduction (GO:0016601)	44366	3.14734e-05	0.000769499	0	0	12.9425	134.167	EPS8;CYFIP1;NCKAP1;ABI2;RAC1;WASF1
positive regulation of supramolecular fiber organization (GO:1902905)	31017	3.17874e-05	0.000769499	0	0	4.70039	48.6793	NCKAP1;PAK1;PRKCE;CDC42EP4;STMN2;KATNB1;SLAIN2;RAC1;MAPT;SYNPO;PFN1;NCK1
regulation of sodium ion transmembrane transporter activity (GO:2000649)	13728	3.19318e-05	0.000769499	0	0	7.75188	80.2468	PRKCE;WNK2;WNK3;STK39;FXYD7;GLRX;ANK3;SCN3B
synaptic vesicle localization (GO:0097479)	44329	5.06074e-05	0.00118773	0	0	17.5054	173.154	SNAPIN;CDK5;SYNJ1;KIF5B;DNM2
positive regulation of lamellipodium assembly (GO:0010592)	44329	5.06074e-05	0.00118773	0	0	17.5054	173.154	CDC42;NCKAP1;CARMIL2;FSCN1;RAC1
regulation of neurotransmitter transport (GO:0051588)	44329	5.06074e-05	0.00118773	0	0	17.5054	173.154	RIMS1;CAMK2A;CPLX2;CPLX1;SYN1
vesicle coating (GO:0006901)	23285	5.75228e-05	0.00131571	0	0	5.31088	51.8519	NAPA;RAB1A;SCFD1;TRAPPC2L;SEC24A;PEF1;PDCD6;RAB1B;PPP6R3;TRAPPC5
COPII vesicle coating (GO:0048208)	23285	5.75228e-05	0.00131571	0	0	5.31088	51.8519	NAPA;RAB1A;SCFD1;TRAPPC2L;SEC24A;PEF1;PDCD6;RAB1B;PPP6R3;TRAPPC5
vesicle targeting, rough ER to cis-Golgi (GO:0048207)	23285	5.75228e-05	0.00131571	0	0	5.31088	51.8519	NAPA;RAB1A;SCFD1;TRAPPC2L;SEC24A;PEF1;PDCD6;RAB1B;PPP6R3;TRAPPC5
regulation of protein polymerization (GO:0032271)	44407	5.9559e-05	0.00135084	0	0	8.54256	83.1067	EPS8;CAMSAP3;TPPP3;TPPP;MAPT;PAK3;PFN1
clathrin coat assembly (GO:0048268)	44330	7.64772e-05	0.00170588	0	0	15.5596	147.482	CLTC;CLTB;HIP1R;CLTA;PICALM
positive regulation of transporter activity (GO:0032411)	44330	7.64772e-05	0.00170588	0	0	15.5596	147.482	WNK1;WNK2;WNK3;STK39;SYNGR3
regulation of calcium ion-dependent exocytosis (GO:0017158)	19603	7.81641e-05	0.00170965	0	0	5.75176	54.3927	RPH3A;RIMS1;SYT3;SYT1;SYN1;STX1A;SYT7;CBARP;SYT17
glutathione derivative biosynthetic process (GO:1901687)	44369	7.91799e-05	0.00170965	0	0	10.5142	99.2936	GSTZ1;GSTA4;GSTO1;MGST3;ESD;AKR1A1
cellular response to nerve growth factor stimulus (GO:1990090)	44369	7.91799e-05	0.00170965	0	0	10.5142	99.2936	EHD1;STMN2;RAPGEF2;MAPT;WASF1;SH3GL2
glutathione derivative metabolic process (GO:1901685)	44369	7.91799e-05	0.00170965	0	0	10.5142	99.2936	GSTZ1;GSTA4;GSTO1;MGST3;ESD;AKR1A1
viral process (GO:0016032)	20/220	8.77282e-05	0.00187919	0	0	2.83472	26.4799	RPL5;RAB1A;LRSAM1;TSG101;PDCD6IP;CTBP1;RAB1B;AP2A1;VPS37A;AP2B1;AP2A2;PACS1;CHMP4B;ATP6V1H;FYN;RAC1;RPS11;AP2M1;RAN;AP1M1
regulation of cardiac conduction (GO:1903779)	24746	9.8543e-05	0.00209423	0	0	4.93716	45.5454	CXADR;PDE4D;ATP2B4;ATP2A2;FXYD7;ANK2;ATP2B2;SRI;SLC8A1;SLC8A2
lamellipodium assembly (GO:0030032)	44370	0.000103998	0.00217589	0	0	9.89518	90.7501	CYFIP1;ABLIM1;DMTN;ABLIM3;ARFIP2;RAC1
viral budding (GO:0046755)	44370	0.000103998	0.00217589	0	0	9.89518	90.7501	LRSAM1;TSG101;PDCD6IP;CHMP1A;CHMP4B;VPS37A
plasma membrane bounded cell projection assembly (GO:0120031)	21/241	0.000108134	0.00220634	0	0	2.70705	24.7212	IQCB1;CYFIP1;DMTN;ARL6;OCRL;ASAP1;DYNLL1;DYNLL2;CD2AP;EHD1;EHD3;RAP2A;ABLIM1;ABLIM3;FSCN1;ARFIP2;RAPGEF2;RAC1;ATP6V0D1;ATP6V1D;SNAP29
positive regulation of protein localization to membrane (GO:1905477)	35034	0.000108684	0.00220634	0	0	4.07512	37.1938	DPP10;PPP3R1;MAPK8;PPP1R13B;KIF5B;PRKCE;WNK3;PTPN9;FYN;ANK3;DYNLL1;DYNLL2
anterograde synaptic vesicle transport (GO:0048490)	44331	0.000111446	0.00220634	0	0	14.0029	127.454	AP3M2;AP3M1;SNAPIN;AP3D1;AP3B2
regulation of clathrin-dependent endocytosis (GO:2000369)	44331	0.000111446	0.00220634	0	0	14.0029	127.454	HIP1R;AAK1;SMAP1;SNAP91;PICALM
positive regulation of exosomal secretion (GO:1903543)	44331	0.000111446	0.00220634	0	0	14.0029	127.454	SMPD3;TSG101;PDCD6IP;HGS;STAM
synaptic vesicle transport along microtubule (GO:0099517)	44331	0.000111446	0.00220634	0	0	14.0029	127.454	AP3M2;AP3M1;SNAPIN;AP3D1;AP3B2
COPII-coated vesicle budding (GO:0090114)	25112	0.000111993	0.00220634	0	0	4.85178	44.1371	NAPA;RAB1A;SCFD1;TRAPPC2L;SEC24A;PEF1;PDCD6;RAB1B;PPP6R3;TRAPPC5
regulation of actin filament polymerization (GO:0030833)	25112	0.000111993	0.00220634	0	0	4.85178	44.1371	EPS8;NCKAP1;PRKCE;CDC42EP4;HIP1R;RAC1;PFN1;PAK3;KANK4;NCK1
regulation of actin filament bundle assembly (GO:0032231)	44371	0.000134617	0.00259522	0	0	9.34496	83.2924	CDC42;TSC1;RAC1;PFN1;SYNPO;SLC9A1
positive regulation of microtubule polymerization or depolymerization (GO:0031112)	44371	0.000134617	0.00259522	0	0	9.34496	83.2924	PAK1;STMN2;KATNB1;SLAIN2;MAPT;RAC1
regulation of neuronal synaptic plasticity (GO:0048168)	44371	0.000134617	0.00259522	0	0	9.34496	83.2924	SYNGR1;RAB3A;CAMK2A;SYP;PPFIA3;SLC8A2
protein polymerization (GO:0051258)	16650	0.000139587	0.00267195	0	0	6.07328	53.9114	TPPP3;GPX4;ARL6;RAC1;TPPP;MAPT;WASF1;WASF3
neuron development (GO:0048666)	15/144	0.000148251	0.00281781	0	0	3.28407	28.9543	LGI1;GPM6A;SNAPIN;STMN2;GBA2;EHD1;MAPK8;ATCAY;CDK5;WNK1;CDH11;TBC1D24;RAPGEF2;MAPT;SH3GL2
regulation of exosomal secretion (GO:1903541)	44332	0.000157488	0.00293245	0	0	12.7293	111.459	SMPD3;TSG101;PDCD6IP;HGS;STAM
positive regulation of ion transmembrane transport (GO:0034767)	44295	0.000157542	0.00293245	0	0	22.378	195.938	WNK1;WNK2;WNK3;STK39
L-ascorbic acid metabolic process (GO:0019852)	44295	0.000157542	0.00293245	0	0	22.378	195.938	CYB5R3;GSTO1;AKR1A1;SLC2A3
receptor metabolic process (GO:0043112)	21429	0.000160966	0.00295541	0	0	5.1635	45.0997	SH3GLB1;UVRAG;EHD3;CLTC;AP2M1;DNM1;DNM2;SNCA;PICALM
positive regulation of cell morphogenesis involved in differentiation (GO:0010770)	21429	0.000160966	0.00295541	0	0	5.1635	45.0997	ROBO2;CDC42;PTPRD;DMTN;PLXNA1;RAC1;CRK;RHOA;ROBO1
positive regulation of ion transport (GO:0043270)	17015	0.000163894	0.00298885	0	0	5.91315	51.5407	RAB3B;SNX4;KIF5B;CAMK2A;WNK3;ANK2;ANK3;SCN3B
regulation of microtubule polymerization (GO:0031113)	12966	0.000169199	0.00302429	0	0	7.01528	60.9238	CAMSAP3;PAK1;STMN2;SLAIN2;RAC1;MAPT;SNCA
carbohydrate catabolic process (GO:0016052)	12966	0.000169199	0.00302429	0	0	7.01528	60.9238	PFKFB2;LDHA;PKM;PGAM1;PGK1;ENO2;ALDOA
actin filament bundle organization (GO:0061572)	12966	0.000169199	0.00302429	0	0	7.01528	60.9238	EPS8;DMTN;DPYSL3;FSCN1;PLS3;RHOA;RHOB
lamellipodium organization (GO:0097581)	44372	0.000171962	0.0030335	0	0	8.85266	76.737	CYFIP1;ABLIM1;DMTN;ABLIM3;ARFIP2;RAC1
regulation of lamellipodium assembly (GO:0010591)	44372	0.000171962	0.0030335	0	0	8.85266	76.737	CDC42;NCKAP1;CARMIL2;DMTN;FSCN1;RAC1
regulation of neuron death (GO:1901214)	26573	0.000182381	0.00319641	0	0	4.53782	39.068	CDK5;DCC;CHMP4B;FAIM2;TSC1;FYN;PARK7;MAPT;SNCA;PICALM
regulation of receptor-mediated endocytosis (GO:0048259)	1936-07-01	0.000203811	0.00350373	0	0	6.77303	57.5593	SGIP1;HIP1R;AAK1;RAC1;SMAP1;SNAP91;PICALM
sodium ion transmembrane transport (GO:0035725)	1936-07-01	0.000203811	0.00350373	0	0	6.77303	57.5593	SLC12A2;SCN8A;SCN3B;SCN2A;SLC8A1;SLC8A2;SCN1A
regulation of filopodium assembly (GO:0051489)	13332	0.000203811	0.00350373	0	0	6.77303	57.5593	CDC42;GPM6A;BCAS3;GAP43;DMTN;DPYSL3;FSCN1
regulation of stress fiber assembly (GO:0051492)	22160	0.000210099	0.00358897	0	0	4.9605	42.0052	CDC42;PAK1;TSC1;EVL;RAC1;PFN1;RHOA;SLC9A1;CLASP2
protein oligomerization (GO:0051259)	19/217	0.000212852	0.00361313	0	0	2.71644	22.9672	SH3GLB1;ADSL;TRAPPC2L;PDCD6IP;GCH1;SYT1;IGHMBP2;AKR1B1;SLC9A1;EHD1;NUDT21;GRHPR;EHD3;EHD4;APC;DPYSL3;CHMP4B;GOPC;MAPT
positive regulation of dendrite extension (GO:1903861)	44333	0.00021676	0.00363838	0	0	11.6679	98.4386	RIMS1;SYT3;SYT1;PLAA;SYT17
regulation of microtubule-based process (GO:0032886)	44373	0.000217036	0.00363838	0	0	8.40959	70.9387	IGBP1;CAMSAP3;APC;TAOK1;MAPT;CLASP2
endosome to lysosome transport (GO:0008333)	17746	0.000222989	0.0037151	0	0	5.61691	47.2292	SNAPIN;BIN1;RAB12;AP3D1;VIPAS39;LYST;UBXN6;RHOB
positive regulation of epithelial cell migration (GO:0010634)	27303	0.00022963	0.00380228	0	0	4.39556	36.8306	BCAS3;BMPR2;PDCD6;PRKCE;PRKCA;FGF1;PFN1;BCAR1;RHOB;CLASP2
cytosolic transport (GO:0016482)	13/118	0.000231527	0.00381031	0	0	3.49085	29.2212	STX16;VPS13C;CLTC;AP2A1;SYT7;EHD3;UBE2O;ERC1;RAB6A;WASHC1;RAB6B;YKT6;TBC1D10B
actin cytoskeleton reorganization (GO:0031532)	22525	0.000238986	0.00390923	0	0	4.86485	40.5685	RAP2A;PAK1;CXADR;DMTN;PHACTR1;RAC1;CDC42BPB;RHOA;BCAR1
regulation of regulated secretory pathway (GO:1903305)	13697	0.000243917	0.0039421	0	0	6.54692	54.4618	RPH3A;SYT3;RAB3A;SYT1;RAB3D;SYT7;SYT17
actin filament bundle assembly (GO:0051017)	1937-07-01	0.000243917	0.0039421	0	0	6.54692	54.4618	EPS8;DMTN;DPYSL3;FSCN1;PLS3;RHOA;RHOB
regulation of calcium ion transmembrane transporter activity (GO:1901019)	2021-06-27	0.000270919	0.00427609	0	0	8.00872	65.7812	FKBP1A;CACNB1;CACNB3;CACNB4;PDE4D;ANK2
negative regulation of microtubule polymerization or depolymerization (GO:0031111)	44374	0.000270919	0.00427609	0	0	8.00872	65.7812	CAMSAP3;APC;STMN2;KATNB1;SNCA;CLASP2
microtubule polymerization (GO:0046785)	44374	0.000270919	0.00427609	0	0	8.00872	65.7812	TPPP3;RANBP9;SLAIN2;TPPP;MAPT;CLASP2
regulation of neurotransmitter secretion (GO:0046928)	2021-06-27	0.000270919	0.00427609	0	0	8.00872	65.7812	RIMS1;STX1B;CAMK2A;CPLX2;CPLX1;SYN1
macromolecular complex assembly (GO:0065003)	13/120	0.000273655	0.00429415	0	0	3.42524	28.0995	DMTN;GPAA1;RANBP9;DNAJB14;NAPG;CD2AP;RIMS1;APC;APBA1;WASF1;VAMP2;WASF3;PICALM
membrane depolarization during action potential (GO:0086010)	14062	0.000290137	0.00449727	0	0	6.3354	51.6028	SCN8A;CACNA1B;CACNA1A;SCN3B;SCN2A;SLC8A1;SCN1A
negative regulation of microtubule depolymerization (GO:0007026)	44334	0.000291598	0.00449727	0	0	10.7698	87.6675	CAMSAP3;APC;STMN2;KATNB1;CLASP2
regulation of dendrite extension (GO:1903859)	44334	0.000291598	0.00449727	0	0	10.7698	87.6675	RIMS1;SYT3;SYT1;PLAA;SYT17
positive regulation of cytoskeleton organization (GO:0051495)	28399	0.00031946	0.004899	0	0	4.19809	33.7899	CDC42;NCKAP1;BCAS3;CDK5;PRKCE;CDC42EP4;RAC1;SYNPO;PFN1;NCK1
protein modification by small protein removal (GO:0070646)	21/261	0.000324568	0.0049492	0	0	2.47886	19.9128	WDR48;USP5;USP9X;GPS1;AKR1B1;STAM;UCHL3;ACTB;RHOA;USP19;PSMD9;COPS3;UCHL1;APC;PSMD5;HGS;PSMD2;COPS2;PSMF1;STAM2;OGT
protein complex assembly (GO:0006461)	17/189	0.00032879	0.00498541	0	0	2.79343	22.4036	SH3GLB1;NAPA;RAB1A;TRAPPC2L;SEC24A;PEF1;PDCD6;RAB1B;TRAPPC5;AKR1B1;SLC9A1;GRHPR;SCFD1;APC;PPP6R3;MAPT;CRK
hydrogen ion transmembrane transport (GO:1902600)	44375	0.000334771	0.00504775	0	0	7.64429	61.1701	ATP6V1B2;ATP6V1E1;ATP6V0D1;ATP6V1C1;SLC9A1;ATP6V1F
dephosphorylation (GO:0016311)	13/124	0.000377809	0.00566503	0	0	3.30112	26.0165	PTPRU;PTPRN2;PTPRS;DUSP3;PPP2R5A;HDHD2;MTMR6;PPP1CB;PTPRD;PPP2CA;PPP2CB;PTPN9;PHPT1
phosphatidylinositol dephosphorylation (GO:0046856)	44297	0.000390287	0.00578782	0	0	15.9826	125.442	MTMR1;SYNJ1;INPP5F;MTMR6
regulation of synaptic vesicle cycle (GO:0098693)	44297	0.000390287	0.00578782	0	0	15.9826	125.442	RIMS1;CDK5;SYN1;SNCA
negative regulation of epidermal growth factor receptor signaling pathway (GO:0042059)	14793	0.000403613	0.00592039	0	0	5.95082	46.506	CDC42;TSG101;HGS;STAM;STAM2;SH3GL2;EPN1
neuron migration (GO:0001764)	14793	0.000403613	0.00592039	0	0	5.95082	46.506	GPM6A;CDK5;USP9X;RAPGEF2;NAV1;MARK2;MARK1
regulation of stress-activated MAPK cascade (GO:0032872)	15158	0.000472315	0.00685365	0	0	5.77549	44.2279	IGBP1;MAP2K1;RAP2A;TAOK1;TAOK2;MAPK8IP3;MAPK8IP1
negative regulation of cell projection organization (GO:0031345)	15158	0.000472315	0.00685365	0	0	5.77549	44.2279	STX1B;PTPRS;DCC;DPYSL3;STMN2;PTPN9;FYN
cell projection assembly (GO:0030031)	44336	0.000498118	0.0070759	0	0	9.33285	70.9733	CYFIP2;CDC42;CYFIP1;NCKAP1;RAC1
viral budding via host ESCRT complex (GO:0039702)	44336	0.000498118	0.0070759	0	0	9.33285	70.9733	TSG101;PDCD6IP;CHMP1A;CHMP4B;VPS37A
regulation of calcium ion transmembrane transport (GO:1903169)	44336	0.000498118	0.0070759	0	0	9.33285	70.9733	CACNB1;UBASH3B;ANK2;FYN;CBARP
negative regulation of protein depolymerization (GO:1901880)	44336	0.000498118	0.0070759	0	0	9.33285	70.9733	CAMSAP3;APC;STMN2;KATNB1;CLASP2
retrograde transport, endosome to Golgi (GO:0042147)	1982-10-01	0.000533533	0.00753929	0	0	3.90554	29.4321	EHD3;STX16;CLTC;UBE2O;ERC1;RAB6A;WASHC1;YKT6;RAB6B;TBC1D10B
regulation of ion transmembrane transporter activity (GO:0032412)	15523	0.000550025	0.00773186	0	0	5.61019	42.1075	WNK1;WNK2;WNK3;STK39;FXYD7;ANK2;SCN3B
establishment of apical/basal cell polarity (GO:0035089)	44298	0.000569402	0.0077617	0	0	13.9841	104.474	CAMSAP3;CDC42;FSCN1;RHOA
regulation of actomyosin structure organization (GO:0110020)	44298	0.000569402	0.0077617	0	0	13.9841	104.474	CDC42;TSC1;RAC1;SLC9A1
regulation of cell communication by electrical coupling (GO:0010649)	44298	0.000569402	0.0077617	0	0	13.9841	104.474	PDE4D;SRI;ANK3;SLC8A1
positive regulation of pseudopodium assembly (GO:0031274)	44298	0.000569402	0.0077617	0	0	13.9841	104.474	CDC42;APC;CDC42EP4;WASHC1
regulation of pseudopodium assembly (GO:0031272)	44298	0.000569402	0.0077617	0	0	13.9841	104.474	CDC42;APC;CDC42EP4;WASHC1
purine nucleoside monophosphate biosynthetic process (GO:0009127)	44298	0.000569402	0.0077617	0	0	13.9841	104.474	ADSL;ATIC;GMPS;GART
regulation of axonogenesis (GO:0050770)	20302	0.000581422	0.00788572	0	0	4.77861	35.6008	ROBO2;PAK1;PLXNA1;PAK3;RHOA;MARK2;ROBO1;DNM2
generation of neurons (GO:0048699)	13/130	0.000596203	0.00800151	0	0	3.13085	23.2464	BRSK1;GPM6A;MAP2K1;USP9X;NAV1;ATP2B2;PTPRD;NRBP2;CDK5;RAPGEF2;MAPT;MARK2;MARK1
organelle transport along microtubule (GO:0072384)	11475	0.000598853	0.00800151	0	0	6.72593	49.9097	CDC42;RAB1A;ARHGAP21;KIF5B;MAPT;RAB6A
proton transport (GO:0015992)	11475	0.000598853	0.00800151	0	0	6.72593	49.9097	ATP6V1B2;ATP6V1E1;ATP6V0D1;ATP6V1C1;SLC9A1;ATP6V1F
regulation of cardiac muscle contraction by calcium ion signaling (GO:0010882)	44337	0.000635244	0.00835334	0	0	8.74909	64.4065	GSTO1;ATP2A2;ANK2;SLC8A1;SLC9A1
negative regulation of macroautophagy (GO:0016242)	44337	0.000635244	0.00835334	0	0	8.74909	64.4065	NRBP2;SCFD1;TSC2;CHMP4B;TSC1
positive regulation of lamellipodium organization (GO:1902745)	44337	0.000635244	0.00835334	0	0	8.74909	64.4065	CDC42;NCKAP1;CARMIL2;FSCN1;RAC1
negative regulation of ERBB signaling pathway (GO:1901185)	15888	0.000637565	0.00835334	0	0	5.45407	40.1302	CDC42;TSG101;HGS;STAM;STAM2;SH3GL2;EPN1
phosphate-containing compound metabolic process (GO:0006796)	16/183	0.000664695	0.00866673	0	0	2.70454	19.7869	ISYNA1;TIGAR;DUSP3;GPX4;INPP1;OCRL;HDHD2;AGPAT1;NUDT3;PTPRD;SYNJ1;CDK5;PGK1;PLAA;ALDOA;PLCB1
stress-activated protein kinase signaling cascade (GO:0031098)	25812	0.000679585	0.00881826	0	0	4.14515	30.2348	MAP2K4;MAP2K1;PAK1;MAPK8;SLK;TAOK1;TAOK2;STK39;PAK3
hexose biosynthetic process (GO:0019319)	16254	0.000735799	0.00945677	0	0	5.30638	38.2832	GPI;PGAM1;PGK1;AKR1B1;ENO1;ENO2;ALDOA
positive regulation of actin filament bundle assembly (GO:0032233)	16254	0.000735799	0.00945677	0	0	5.30638	38.2832	CDC42;PAK1;EVL;RAC1;SYNPO;PFN1;RHOA
regulation of autophagy (GO:0010506)	17/203	0.000746508	0.00954893	0	0	2.58128	18.5855	SH3GLB1;ATP6V1A;PRKAA1;RAB39B;UCHL1;MAPK8;CDK5;ATP6V1B2;ATP6V1H;MAPT;ATP6V1E1;ATP6V0D1;LAMTOR3;WASHC1;ATP6V1D;ATP6V1C1;ATP6V0A1
monoamine transport (GO:0015844)	44261	0.000769204	0.0096562	0	0	27.9349	200.297	PICK1;SLC6A3;SLC18A2
response to lead ion (GO:0010288)	44261	0.000769204	0.0096562	0	0	27.9349	200.297	PPP2CA;PPP2CB;MAPT
regulation of extracellular exosome assembly (GO:1903551)	44261	0.000769204	0.0096562	0	0	27.9349	200.297	TSG101;PDCD6IP;STAM
insulin secretion involved in cellular response to glucose stimulus (GO:0035773)	44261	0.000769204	0.0096562	0	0	27.9349	200.297	PTPRN2;PTPRN;RAB11FIP2
negative regulation of protein polymerization (GO:0032272)	2021-05-22	0.000798793	0.0098591	0	0	8.23401	58.7284	STMN2;HIP1R;PFN1;KANK4;SNCA
regulation of microtubule depolymerization (GO:0031114)	44338	0.000798793	0.0098591	0	0	8.23401	58.7284	CAMSAP3;APC;STMN2;KATNB1;CLASP2
catecholamine biosynthetic process (GO:0042423)	44299	0.000799979	0.0098591	0	0	12.4296	88.6348	DDC;GCH1;TH;SNCA
regulation of synaptic vesicle transport (GO:1902803)	2021-04-13	0.000799979	0.0098591	0	0	12.4296	88.6348	RIMS1;CDK5;SYN1;SNCA
regulation of epidermal growth factor receptor signaling pathway (GO:0042058)	21398	0.000835617	0.0102515	0	0	4.4912	31.8306	CDC42;TSG101;HGS;HIP1R;STAM;STAM2;SH3GL2;EPN1
nicotinamide nucleotide metabolic process (GO:0046496)	16619	0.000845628	0.0103258	0	0	5.16648	36.555	PFKFB2;LDHA;PKM;PGAM1;PGK1;ENO2;ALDOA
establishment or maintenance of epithelial cell apical/basal polarity (GO:0045197)	12206	0.000849323	0.0103258	0	0	6.22707	44.032	CDC42;CAMSAP3;PDCD6IP;LIN7B;MARK2;RHOA
positive regulation of cellular component biogenesis (GO:0044089)	32051	0.000854732	0.0103449	0	0	3.65098	25.7932	SMPD3;PTPRD;PDCD6IP;TSG101;HGS;PRKCA;TPPP;STAM;SYNPO;PFN1
regulation of neuron projection development (GO:0010975)	12/119	0.000887804	0.0106972	0	0	3.15712	22.1844	RET;STX1B;NDRG4;PAK1;PTPRS;DCC;DPYSL3;STMN2;RAPGEF2;PTPN9;PAK3;MARK2
cell morphogenesis (GO:0000902)	21763	0.000937804	0.0112495	0	0	4.4029	30.6969	CYFIP2;CYFIP1;NCKAP1;SCFD1;CDH11;PACSIN2;RAC1;CAP2
interleukin-12-mediated signaling pathway (GO:0035722)	16984	0.000967992	0.0115093	0	0	5.03374	34.9356	CDC42;MTAP;GSTO1;PITPNA;BOLA2;MIF;PLCB1
cellular response to interleukin-12 (GO:0071349)	16984	0.000967992	0.0115093	0	0	5.03374	34.9356	CDC42;MTAP;GSTO1;PITPNA;BOLA2;MIF;PLCB1
neuronal action potential (GO:0019228)	44339	0.000991792	0.0116385	0	0	7.77617	53.7799	SCN8A;KCNA2;ANK3;SCN2A;SCN1A
microtubule polymerization or depolymerization (GO:0031109)	2021-05-23	0.000991792	0.0116385	0	0	7.77617	53.7799	TPPP3;STMN2;KATNB1;MAPT;TPPP
regulation of release of sequestered calcium ion into cytosol by sarcoplasmic reticulum (GO:0010880)	44339	0.000991792	0.0116385	0	0	7.77617	53.7799	GSTO1;PDE4D;ANK2;SRI;SLC8A1
positive regulation of protein binding (GO:0032092)	22129	0.00104976	0.0122654	0	0	4.31801	29.6181	PPP2CA;FKBP1A;PPP2CB;SYAP1;HIP1R;RAPGEF2;PARK7;RAN
ribonucleoside monophosphate biosynthetic process (GO:0009156)	2021-04-14	0.00108938	0.0126734	0	0	11.1861	76.3131	ADSL;ATIC;GMPS;GART
regulation of cardiac muscle contraction (GO:0055117)	1935-06-01	0.00117361	0.0135948	0	0	5.79701	39.1163	PDE4D;ATP2A2;ANK2;SRI;SLC8A1;SLC9A1
dendritic spine organization (GO:0097061)	2021-05-24	0.00121737	0.0139223	0	0	7.36651	49.4371	CDC42;CTNND2;PICK1;FYN;PAK3
negative regulation of protein localization to membrane (GO:1905476)	2021-05-24	0.00121737	0.0139223	0	0	7.36651	49.4371	DMTN;CLTC;PPP2R5A;AP2M1;PICALM
negative regulation of cytoskeleton organization (GO:0051494)	44340	0.00121737	0.0139223	0	0	7.36651	49.4371	HIP1R;PFN1;CORO1A;KANK4;ARPIN
regulation of cardiac muscle cell membrane potential (GO:0086036)	44262	0.00131141	0.0147479	0	0	20.9501	139.038	EHD3;ATP2A2;SLC9A1
positive regulation of extracellular matrix disassembly (GO:0090091)	2021-03-07	0.00131141	0.0147479	0	0	20.9501	139.038	CARMIL2;FSCN1;CLASP2
pteridine-containing compound biosynthetic process (GO:0042559)	44262	0.00131141	0.0147479	0	0	20.9501	139.038	SPR;GCH1;PTS
negative regulation of dendrite development (GO:2000171)	44262	0.00131141	0.0147479	0	0	20.9501	139.038	PTPRS;DCC;RAPGEF2
activation of protein kinase activity (GO:0032147)	18/233	0.00134302	0.0150407	0	0	2.36437	15.6352	MAP2K4;MAP2K1;PRKAA1;STK39;ADCY1;PARK7;FGF1;PAK1;ADCY9;SLK;TAOK1;TAOK2;MADD;UBE2N;PAK3;PRKACB;CRK;MARK2
actin polymerization or depolymerization (GO:0008154)	13302	0.00136758	0.0151897	0	0	5.60349	36.9534	ABI2;EVL;RAC1;WASF1;WASF3;CAP2
axonal transport (GO:0098930)	13302	0.00136758	0.0151897	0	0	5.60349	36.9534	AP3M2;AP3M1;SNAPIN;AP3D1;MAPT;AP3B2
glutathione metabolic process (GO:0006749)	18080	0.00142022	0.0156456	0	0	4.67346	30.6436	GSTZ1;GSTA4;GSTO1;ETHE1;GDAP1L1;PARK7;CNDP2
regulation of release of sequestered calcium ion into cytosol (GO:0051279)	18080	0.00142022	0.0156456	0	0	4.67346	30.6436	FKBP1A;UBASH3B;GSTO1;PDE4D;ANK2;SRI;SNCA
regulation of cell-substrate junction assembly (GO:0090109)	2021-04-15	0.001445	0.0158538	0	0	10.1686	66.4994	CAMSAP3;SLK;RHOA;SLC9A1
cytoskeleton organization (GO:0007010)	12/126	0.00146346	0.0159642	0	0	2.96219	19.334	CDC42;PCLO;DMTN;ABI2;BIN1;DPYSL2;PACSIN2;ANK3;CDC42BPB;WASF3;MARK1;PACSIN1
regulation of voltage-gated calcium channel activity (GO:1901385)	44341	0.00147872	0.0159642	0	0	6.99782	45.6019	CACNB1;CACNB3;CACNB4;SRI;CBARP
positive regulation of filopodium assembly (GO:0051491)	44341	0.00147872	0.0159642	0	0	6.99782	45.6019	CDC42;GPM6A;BCAS3;DPYSL3;FSCN1
peptidyl-tyrosine dephosphorylation (GO:0035335)	2021-05-25	0.00147872	0.0159642	0	0	6.99782	45.6019	PTPRS;DUSP3;UBASH3B;PTPN9;PTPN11
positive regulation of establishment of protein localization to mitochondrion (GO:1903749)	11/110	0.00153654	0.0165224	0	0	3.12461	20.2419	SH3GLB1;PPP3R1;MAPK8;GPR26;PPP1R13B;ABLIM3;UBE2D3;ARIH2;KCNN3;DYNLL1;DYNLL2
central nervous system development (GO:0007417)	17/217	0.00155365	0.0166401	0	0	2.39883	15.5136	ROBO2;NCKAP1;NDRG4;SLC6A17;NCAN;ADAM22;WWP1;PTPN11;GBA2;PTS;SRR;CDK5;FYN;TAGLN3;PAFAH1B3;SH3GL2;SH3GL1
positive regulation of mitochondrial outer membrane permeabilization involved in apoptotic signaling pathway (GO:1901030)	1937-06-01	0.00158506	0.0169094	0	0	5.42245	34.9593	PPP3R1;MAPK8;PPP1R13B;HIP1R;DYNLL1;DYNLL2
transmembrane transport (GO:0055085)	25/378	0.00165912	0.0176298	0	0	2.0064	12.8439	ATP6V1A;TTYH1;CHRNA4;ATP2A2;ABCB9;PSMD9;PSMD5;PSMD2;ATP6V1H;PSMF1;ATP6V1E1;ATP6V1D;ATP6V1C1;ATP6V0A1;ATP6V1F;DMTN;SVOP;ATP2B4;WWP1;ATP2B2;GABRG2;SLC22A23;ATP6V1B2;FXYD7;ATP6V0D1
regulation of heart contraction (GO:0008016)	1995-10-01	0.00168632	0.0178486	0	0	3.30599	21.1094	TH;PDE4D;ATP2B4;ATP2A2;FXYD7;ANK2;ATP2B2;SRI;SLC8A1;SLC8A2
ion transmembrane transport (GO:0034220)	17/219	0.00171414	0.0180721	0	0	2.37483	15.1249	ATP6V1A;TTYH1;CHRNA4;ATP2B4;WWP1;ATP2A2;ATP2B2;GABRG2;ATP6V1B2;FXYD7;ATP6V1H;ATP6V1E1;ATP6V0D1;ATP6V1D;ATP6V1C1;ATP6V0A1;ATP6V1F
negative regulation of neuron projection development (GO:0010977)	18810	0.00180319	0.0188636	0	0	4.46057	28.1828	STX1B;PTPRS;DCC;DPYSL3;STMN2;PTPN9;RHOA
positive regulation of developmental growth (GO:0048639)	18810	0.00180319	0.0188636	0	0	4.46057	28.1828	RIMS1;SYT3;SYT1;PLAA;MAPT;PLCB1;SYT17
regulation of cellular amide metabolic process (GO:0034248)	14032	0.00182786	0.0190478	0	0	5.25273	33.1164	CYFIP2;CYFIP1;TIGAR;PGAM1;TSC1;EIF4E
regulation of mitotic cell cycle (GO:0007346)	14/165	0.00187283	0.0194414	0	0	2.61171	16.4023	MAP2K4;MAP2K1;DUSP3;CLTC;STK39;PRKCA;PAK1;SLK;RPS6KB1;ERCC3;TAOK1;TAOK2;PAK3;EIF4E
plasma membrane bounded cell projection morphogenesis (GO:0120039)	19176	0.00202244	0.0207423	0	0	4.36122	27.0546	NCKAP1;GPM6A;PAK1;RAC1;NYAP2;DNM2;PACSIN1
regulation of amyloid precursor protein catabolic process (GO:1902991)	44263	0.00204426	0.0207423	0	0	16.7592	103.785	FKBP1A;FLOT2;PICALM
response to epinephrine (GO:0071871)	44263	0.00204426	0.0207423	0	0	16.7592	103.785	ATP2B4;SLC9A1;SNCA
positive regulation of steroid biosynthetic process (GO:0010893)	44263	0.00204426	0.0207423	0	0	16.7592	103.785	GUCY2C;PRKAA1;FGF1
cellular response to epinephrine stimulus (GO:0071872)	44263	0.00204426	0.0207423	0	0	16.7592	103.785	ATP2B4;SLC9A1;SNCA
inositol phosphate catabolic process (GO:0071545)	44263	0.00204426	0.0207423	0	0	16.7592	103.785	SYNJ1;INPP1;NUDT3
purine ribonucleoside monophosphate biosynthetic process (GO:0009168)	14397	0.00209781	0.0211268	0	0	5.09329	31.4096	ADSL;ATIC;GMPS;AMPD2;ALDOA;GART
regulation of plasma membrane bounded cell projection assembly (GO:0120032)	14397	0.00209781	0.0211268	0	0	5.09329	31.4096	CDC42;ATG3;GAP43;DMTN;FSCN1;RAC1
regulation of protein localization to membrane (GO:1905475)	44303	0.00238414	0.0238326	0	0	8.60334	51.9549	CDK5;STX7;AKR1B1;FYN
regulation of lamellipodium organization (GO:1902743)	44303	0.00238414	0.0238326	0	0	8.60334	51.9549	CDC42;CARMIL2;DMTN;RAC1
receptor-mediated endocytosis (GO:0006898)	15/188	0.00240026	0.0239051	0	0	2.4432	14.7378	CLTC;CLTB;HIP1R;CLTA;AP2A1;AP2B1;AP2A2;DNM1;DNM2;INPP5F;DNAJC6;WASF1;AP2M1;PICALM;SNCA
neuron projection extension (GO:1990138)	44344	0.0025104	0.0249102	0	0	6.08412	36.4275	CYFIP1;IMPACT;CDK5;USP9X;SH3GL2
negative regulation of cellular component organization (GO:0051129)	1954-07-01	0.00252234	0.024937	0	0	4.1752	24.9784	CDC42;LRSAM1;IMPACT;CARMIL2;AKR1B1;HSPA2;DNM2
protein homooligomerization (GO:0051260)	15/190	0.00265732	0.0261756	0	0	2.41502	14.3221	PDCD6IP;SYT1;GCH1;IGHMBP2;MIF;GLS;EHD1;EHD3;SRR;EHD4;APC;DPYSL3;CHMP4B;GOPC;ALDOA
gluconeogenesis (GO:0006094)	15128	0.0027267	0.0267613	0	0	4.80174	28.3527	GPI;PGAM1;PGK1;ENO1;ENO2;ALDOA
positive regulation of protein kinase activity (GO:0045860)	14/172	0.00275233	0.026915	0	0	2.49509	14.7093	MAP2K4;MAP2K1;SYAP1;STK39;RHOA;PPP2CA;PAK1;SLK;TAOK1;TAOK2;RAPGEF2;PAK3;MARK2;SNCA
positive regulation of endothelial cell migration (GO:0010595)	1970-08-01	0.00286237	0.0278901	0	0	3.61967	21.1972	BCAS3;BMPR2;PDCD6;AKT3;PRKCA;FGF1;BCAR1;RHOB
regulation of peptidyl-serine phosphorylation (GO:0033135)	31656	0.0029456	0.028393	0	0	3.28109	19.1204	PAK1;DMTN;PDE4D;ATP2B4;BRAF;PARK7;MIF;NCK1;SNCA
regulation of adherens junction organization (GO:1903391)	44304	0.00298201	0.028393	0	0	7.98841	46.4538	CAMSAP3;SLK;RHOA;SLC9A1
insulin secretion (GO:0030073)	2021-04-18	0.00298201	0.028393	0	0	7.98841	46.4538	PTPRN2;PTPRN;PARK7;RAB11FIP2
actin crosslink formation (GO:0051764)	44264	0.00298762	0.028393	0	0	13.9653	81.184	EPS8;DPYSL3;PLS3
central nervous system neuron development (GO:0021954)	2021-03-09	0.00298762	0.028393	0	0	13.9653	81.184	RAPGEF2;MAPT;GBA2
cellular response to oxygen levels (GO:0071453)	2021-03-09	0.00298762	0.028393	0	0	13.9653	81.184	ATP6V1A;PICK1;ATP6V0D1
establishment of epithelial cell apical/basal polarity (GO:0045198)	44264	0.00298762	0.028393	0	0	13.9653	81.184	CDC42;CAMSAP3;RHOA
regulation of cation channel activity (GO:2001257)	1971-08-01	0.00313001	0.0296418	0	0	3.56203	20.5412	CACNB1;FKBP1A;CACNB3;CACNB4;PDE4D;ANK2;ANK3;VAMP2
lysosomal transport (GO:0007041)	26512	0.00341671	0.0319985	0	0	3.5062	19.912	AP3M1;EHD3;SNAPIN;HGS;BIN1;RAB12;VIPAS39;RHOB
response to metal ion (GO:0010038)	26512	0.00341671	0.0319985	0	0	3.5062	19.912	PPP2CA;PPP2CB;PEF1;PDCD6;KCNMA1;MAPT;SNCB;SNCA
Rho protein signal transduction (GO:0007266)	26512	0.00341671	0.0319985	0	0	3.5062	19.912	EPS8;CDC42;PAK1;CDC42EP4;RAC1;PAK3;RHOA;RHOB
regulation of protein insertion into mitochondrial membrane involved in apoptotic signaling pathway (GO:1900739)	44346	0.00343815	0.0319985	0	0	5.59681	31.7497	PPP3R1;MAPK8;PPP1R13B;DYNLL1;DYNLL2
positive regulation of protein insertion into mitochondrial membrane involved in apoptotic signaling pathway (GO:1900740)	44346	0.00343815	0.0319985	0	0	5.59681	31.7497	PPP3R1;MAPK8;PPP1R13B;DYNLL1;DYNLL2
positive regulation of protein localization to plasma membrane (GO:1903078)	15858	0.00348709	0.0323424	0	0	4.54172	25.7002	DPP10;KIF5B;PRKCE;WNK3;PTPN9;ACSL3
negative regulation of protein localization to plasma membrane (GO:1903077)	44305	0.00367468	0.0336202	0	0	7.45546	41.7975	CLTC;PPP2R5A;AP2M1;PICALM
cyclic nucleotide biosynthetic process (GO:0009190)	44305	0.00367468	0.0336202	0	0	7.45546	41.7975	GUCY2C;ADCY9;AMPD2;ADCY1
purine ribonucleotide catabolic process (GO:0009154)	44305	0.00367468	0.0336202	0	0	7.45546	41.7975	HINT1;PDE4D;PDE2A;NUDT3
negative regulation of protein localization to cell periphery (GO:1904376)	2021-04-19	0.00367468	0.0336202	0	0	7.45546	41.7975	CLTC;PPP2R5A;AP2M1;PICALM
regulation of protein complex assembly (GO:0043254)	1973-08-01	0.00372334	0.0339503	0	0	3.45207	19.3079	NAPA;CDC42;STX1B;NAPB;IMPACT;STXBP1;PTPN11;TPPP
autophagosome assembly (GO:0000045)	1958-07-01	0.0038019	0.034434	0	0	3.84693	21.4361	ATG3;RAB1A;PACS2;RAB1B;MFN2;WIPI2;ATG7
sodium ion transport (GO:0006814)	1958-07-01	0.0038019	0.034434	0	0	3.84693	21.4361	SLC12A2;SCN8A;SCN3B;SCN2A;SLC8A1;SLC8A2;SCN1A
protein deubiquitination (GO:0016579)	18/257	0.00389127	0.0351255	0	0	2.12427	11.7876	WDR48;USP5;USP9X;AKR1B1;STAM;UCHL3;ACTB;RHOA;USP19;PSMD9;UCHL1;APC;PSMD5;HGS;PSMD2;PSMF1;STAM2;OGT
positive regulation of macroautophagy (GO:0016239)	16224	0.0039215	0.0352804	0	0	4.42197	24.5034	GPSM1;SH3GLB1;UVRAG;SCOC;LRSAM1;TSC2
anterograde axonal transport (GO:0008089)	44347	0.00398417	0.0357251	0	0	5.38127	29.7338	AP3M2;AP3M1;SNAPIN;AP3D1;AP3B2
regulation of cell cycle process (GO:0010564)	33117	0.004005	0.035793	0	0	3.11841	17.2143	SH3GLB1;CDC42;UVRAG;APC;CDK5;BIN1;CETN2;GIT1;USP19
peptidyl-serine dephosphorylation (GO:0070262)	2021-03-10	0.0041586	0.0362066	0	0	11.9696	65.6243	PPP2CA;PPP2CB;NCK1
positive regulation of alcohol biosynthetic process (GO:1902932)	2021-03-10	0.0041586	0.0362066	0	0	11.9696	65.6243	PRKAA1;FGF1;SNCA
regulation of platelet-derived growth factor receptor signaling pathway (GO:0010640)	2021-03-10	0.0041586	0.0362066	0	0	11.9696	65.6243	NDRG4;HGS;SNCA
contractile actin filament bundle assembly (GO:0030038)	2021-03-10	0.0041586	0.0362066	0	0	11.9696	65.6243	ZYX;PHACTR1;RHOA
regulation of actin filament-based movement (GO:1903115)	2021-03-10	0.0041586	0.0362066	0	0	11.9696	65.6243	PDE4D;ANK2;SRI
protein deneddylation (GO:0000338)	2021-03-10	0.0041586	0.0362066	0	0	11.9696	65.6243	COPS3;COPS2;GPS1
polarized epithelial cell differentiation (GO:0030859)	44265	0.0041586	0.0362066	0	0	11.9696	65.6243	CDC42;CAMSAP3;RHOA
stress fiber assembly (GO:0043149)	2021-03-10	0.0041586	0.0362066	0	0	11.9696	65.6243	ZYX;PHACTR1;RHOA
cell junction assembly (GO:0034329)	1959-07-01	0.00418745	0.0363406	0	0	3.77276	20.6583	CDC42;VMP1;CDH11;FSCN1;ACTB;RHOA;ACTG1
metal ion homeostasis (GO:0055065)	16589	0.00439471	0.0376918	0	0	4.30836	23.383	SLC12A2;CADPS2;SLC7A8;ANK3;SLC12A6;SLC8A1
purine ribonucleotide biosynthetic process (GO:0009152)	1975-08-01	0.00440007	0.0376918	0	0	3.34868	18.1704	GUCY2C;ADSL;ADCY9;GMPS;AMPD2;ADCY1;ALDOA;COASY
cellular protein complex assembly (GO:0043623)	12/144	0.00444413	0.0376918	0	0	2.55585	13.8429	FKBP1A;UVRAG;GPX4;ARL6;HSPA4;CLTC;CLTB;HIP1R;CLTA;EIF4B;PICALM;NCK1
vacuolar acidification (GO:0007035)	44306	0.00446883	0.0376918	0	0	6.98913	37.8156	DMXL2;ATP6V1H;ATP6V0D1;ATP6V0A1
negative regulation of intracellular protein transport (GO:0090317)	2021-04-20	0.00446883	0.0376918	0	0	6.98913	37.8156	BAG4;DMTN;PARK7;RANGAP1
negative regulation of macromolecule biosynthetic process (GO:0010558)	2021-04-20	0.00446883	0.0376918	0	0	6.98913	37.8156	CLTC;AKR1B1;AP2A1;APBB1
neuromuscular junction development (GO:0007528)	44306	0.00446883	0.0376918	0	0	6.98913	37.8156	CACNB1;CACNB3;CACNB4;ANK3
Arp2/3 complex-mediated actin nucleation (GO:0034314)	44306	0.00446883	0.0376918	0	0	6.98913	37.8156	ARPC1A;ARPC5L;ARPC4;WASHC1
inactivation of MAPK activity (GO:0000188)	2021-04-20	0.00446883	0.0376918	0	0	6.98913	37.8156	PPP2CA;DUSP3;RGS3;GPS1
glycerophospholipid biosynthetic process (GO:0046474)	13/164	0.00479896	0.0403501	0	0	2.42159	12.9298	ARF3;MTMR1;ACHE;VAC14;CHKB;OCRL;DDHD1;AGPAT1;MTMR6;PTDSS1;INPP5F;SYNJ1;CEPT1
regulation of cytokinesis (GO:0032465)	28338	0.00516756	0.0433144	0	0	3.25128	17.1191	SH3GLB1;CDC42;UVRAG;CETN2;PRKCE;GIPC1;GIT1;RHOA
regulation of autophagosome assembly (GO:2000785)	12175	0.00525733	0.0438144	0	0	4.99637	26.2216	SH3GLB1;LRSAM1;SCFD1;RAB1B;CHMP4B
regulation of protein binding (GO:0043393)	10/111	0.00525967	0.0438144	0	0	2.77995	14.5883	PPP2CA;FKBP1A;MAPK8;SNAPIN;HIP1R;RAPGEF2;PARK7;CRK;ACTB;RAN
axon development (GO:0061564)	1994-09-01	0.00534121	0.0441949	0	0	2.97104	15.5454	BRSK1;GAP43;RAB3A;CDK5;DCC;TAOK2;ANK3;APBB1;PAK3
regulation of ruffle assembly (GO:1900027)	44307	0.00537085	0.0441949	0	0	6.57766	34.3799	EPS8;CARMIL2;EVL;PFN1
cortical actin cytoskeleton organization (GO:0030866)	44307	0.00537085	0.0441949	0	0	6.57766	34.3799	NCKAP1;STRIP1;WIPF2;WIPF3
vesicle docking (GO:0048278)	44307	0.00537085	0.0441949	0	0	6.57766	34.3799	STX1B;STX16;STX7;STX1A
polyol metabolic process (GO:0019751)	17319	0.00546553	0.0446234	0	0	4.09777	21.3465	ISYNA1;SYNJ1;INPP1;OCRL;PLCB1;NUDT3
inositol phosphate metabolic process (GO:0043647)	17319	0.00546553	0.0446234	0	0	4.09777	21.3465	ISYNA1;SYNJ1;INPP1;OCRL;PLCB1;NUDT3
cellular protein catabolic process (GO:0044257)	1962-07-01	0.00552257	0.0446234	0	0	3.56642	18.5415	RAB12;CLTC;CLTA;AP2A1;AP2B1;AP2A2;AP2M1
positive regulation of extracellular matrix organization (GO:1903055)	2021-03-11	0.00557172	0.0446234	0	0	10.4729	54.3547	CARMIL2;FSCN1;CLASP2
protein localization to pre-autophagosomal structure (GO:0034497)	2021-03-11	0.00557172	0.0446234	0	0	10.4729	54.3547	PACS2;MFN2;WIPI2
calcium ion regulated exocytosis (GO:0017156)	2021-03-11	0.00557172	0.0446234	0	0	10.4729	54.3547	RIMS1;VAMP2;SYT7
negative regulation of amyloid precursor protein catabolic process (GO:1902992)	2021-03-11	0.00557172	0.0446234	0	0	10.4729	54.3547	BIN1;FLOT2;PICALM
cellular response to increased oxygen levels (GO:0036295)	2021-03-11	0.00557172	0.0446234	0	0	10.4729	54.3547	ATP6V1A;ATP6V0D1;ATG7
hepatocyte growth factor receptor signaling pathway (GO:0048012)	2021-03-11	0.00557172	0.0446234	0	0	10.4729	54.3547	PAK1;RAC1;BCAR1
regulation of insulin receptor signaling pathway (GO:0046626)	12540	0.00599111	0.0478402	0	0	4.82383	24.6859	RPS6KB1;TSC2;TSC1;OGT;NCK1
positive regulation of cell projection organization (GO:0031346)	23193	0.00603152	0.0480209	0	0	3.50255	17.9007	RET;NDRG4;CARMIL2;DPYSL3;STMN2;RAPGEF2;MARK2
regulation of catecholamine secretion (GO:0050433)	44308	0.00638687	0.0505518	0	0	6.21192	31.392	CHRNA4;KCNA2;STX1A;SNCA
purine-containing compound biosynthetic process (GO:0072522)	44308	0.00638687	0.0505518	0	0	6.21192	31.392	ADAL;ADSL;GMPS;AMPD2
regulation of protein serine/threonine kinase activity (GO:0071900)	29434	0.00650551	0.0513403	0	0	3.11532	15.686	PPP2CA;UVRAG;MAP2K1;TSG101;HGS;SYAP1;RHOA;SNCA
cell morphogenesis involved in neuron differentiation (GO:0048667)	35674	0.00655179	0.0515548	0	0	2.86931	14.4269	BRSK1;RAB3A;CDK5;DCC;SDC2;TAOK2;ANK3;APBB1;PAK3
glucose metabolic process (GO:0006006)	1964-07-01	0.00657467	0.0515844	0	0	3.44092	17.289	GPI;PGAM1;AKR1A1;PGK1;ENO1;ENO2;ALDOA
regulation of sodium ion transport (GO:0002028)	1935-05-01	0.00679403	0.0529973	0	0	4.6628	23.2753	WNK1;WNK3;ATP2B4;ANK3;SCN3B
regulation of phosphoprotein phosphatase activity (GO:0043666)	12905	0.00679403	0.0529973	0	0	4.6628	23.2753	FKBP1A;PPP4R4;PPP6R3;TIPRL;TSC1
apoptotic process (GO:0006915)	16/231	0.00696102	0.0541435	0	0	2.09547	10.4091	CYFIP2;NCKAP1;DCC;PRKCE;MAGI3;PRUNE2;TSC2;RHOB;PPP2CA;ATCAY;CDK5;IRF3;ERCC3;TAOK2;CDIP1;OGT
Golgi localization (GO:0051645)	44267	0.00723917	0.0556653	0	0	9.30873	45.8757	CDC42;UVRAG;ARHGAP21
exit from mitosis (GO:0010458)	44267	0.00723917	0.0556653	0	0	9.30873	45.8757	EPS8;CHMP4B;CLASP2
positive regulation of ruffle assembly (GO:1900029)	44267	0.00723917	0.0556653	0	0	9.30873	45.8757	EPS8;CARMIL2;PFN1
regulation of protein localization to cell periphery (GO:1904375)	44267	0.00723917	0.0556653	0	0	9.30873	45.8757	CDK5;STX7;AKR1B1
receptor internalization (GO:0031623)	1950-06-01	0.00741275	0.0565563	0	0	3.81779	18.7245	CLTC;AP2M1;DNM1;DNM2;SNCA;PICALM
melanosome organization (GO:0032438)	2021-04-23	0.00752268	0.0565563	0	0	5.88467	28.775	SNAPIN;AP3D1;LYST;AP1M1
TOR signaling (GO:0031929)	2021-04-23	0.00752268	0.0565563	0	0	5.88467	28.775	RPS6KB1;SYAP1;TIPRL;EIF4EBP2
nucleotide-excision repair, DNA damage recognition (GO:0000715)	44309	0.00752268	0.0565563	0	0	5.88467	28.775	COPS3;CETN2;GPS1;COPS2
membrane assembly (GO:0071709)	2021-04-23	0.00752268	0.0565563	0	0	5.88467	28.775	PTPRD;NRXN2;FLOT2;ANK3
phospholipid dephosphorylation (GO:0046839)	2021-04-23	0.00752268	0.0565563	0	0	5.88467	28.775	MTMR1;SYNJ1;INPP5F;MTMR6
regulation of microtubule cytoskeleton organization (GO:0070507)	2021-04-23	0.00752268	0.0565563	0	0	5.88467	28.775	CAMSAP3;TAOK1;MAPT;CLASP2
regulation of ion homeostasis (GO:2000021)	44309	0.00752268	0.0565563	0	0	5.88467	28.775	WNK1;WNK2;WNK3;AP3D1
activation of MAPK activity (GO:0000187)	10/117	0.00757531	0.0567938	0	0	2.62324	12.8089	MAP2K4;MAP2K1;PRKAA1;TAOK1;MADD;TAOK2;STK39;UBE2N;FGF1;MAPK8IP3
positive regulation of signaling (GO:0023056)	1936-05-01	0.00766926	0.057023	0	0	4.51215	21.9766	LGI1;RIMS1;INPP5F;SYT1;SNCA
plasma membrane organization (GO:0007009)	1936-05-01	0.00766926	0.057023	0	0	4.51215	21.9766	PACSIN2;ANK2;ANK3;SYT7;PACSIN1
regulation of cell morphogenesis involved in differentiation (GO:0010769)	1936-05-01	0.00766926	0.057023	0	0	4.51215	21.9766	PAK1;RAP2A;SDC2;PAK3;MARK2
regulation of cell cycle (GO:0051726)	15/215	0.0082615	0.0612577	0	0	2.11038	10.1217	MAP2K4;MAP2K1;PPP1R13B;CTBP1;STK39;TSC2;TSC1;RHOB;PAK1;SLK;TAOK1;CHMP1A;TAOK2;MADD;PAK3
positive regulation of axonogenesis (GO:0050772)	13636	0.00861992	0.063566	0	0	4.37092	20.7779	ROBO2;PLXNA1;MAPT;RHOA;ROBO1
positive regulation of stress fiber assembly (GO:0051496)	13636	0.00861992	0.063566	0	0	4.37092	20.7779	CDC42;PAK1;EVL;RAC1;RHOA
positive regulation of microtubule polymerization (GO:0031116)	2021-04-24	0.00878374	0.0642475	0	0	5.59014	26.4685	PAK1;SLAIN2;MAPT;RAC1
actin nucleation (GO:0045010)	2021-04-24	0.00878374	0.0642475	0	0	5.59014	26.4685	ARPC1A;ARPC5L;ARPC4;WASHC1
cAMP metabolic process (GO:0046058)	44310	0.00878374	0.0642475	0	0	5.59014	26.4685	ADCY9;PDE4D;PDE2A;ADCY1
positive regulation of MAP kinase activity (GO:0043406)	13/177	0.00894894	0.0651931	0	0	2.22813	10.5083	MAP2K4;MAP2K1;PRKAA1;STK39;FGF1;ROBO1;PAK1;TAOK1;MADD;TAOK2;DVL2;UBE2N;CRK
positive regulation of secretion by cell (GO:1903532)	19146	0.00896133	0.0651931	0	0	3.65142	17.2158	ACHE;STX1B;RAB3A;RAB27B;STX1A;CLASP2
negative regulation of phosphatase activity (GO:0010923)	1968-07-01	0.00911602	0.0654824	0	0	3.21462	15.1014	FKBP1A;CAMSAP3;WNK1;PPP4R4;TIPRL;SLC7A14;MPHOSPH10
peptidyl-threonine phosphorylation (GO:0018107)	1968-07-01	0.00911602	0.0654824	0	0	3.21462	15.1014	MAP2K1;MAPK8;CDK5;WNK1;CAMK2A;STK39;MARK2
positive regulation of sodium ion transport (GO:0010765)	2021-03-13	0.00917093	0.0654824	0	0	8.37742	39.3045	WNK3;ANK3;SCN3B
positive regulation of cellular carbohydrate metabolic process (GO:0010676)	2021-03-13	0.00917093	0.0654824	0	0	8.37742	39.3045	TIGAR;PRKCE;SNCA
synaptic vesicle cycle (GO:0099504)	44268	0.00917093	0.0654824	0	0	8.37742	39.3045	RAB3A;SYT7;SLC18A2
negative regulation of reactive oxygen species biosynthetic process (GO:1903427)	44268	0.00917093	0.0654824	0	0	8.37742	39.3045	ATP2B4;PARK7;SLC18A2
tRNA splicing, via endonucleolytic cleavage and ligation (GO:0006388)	2021-03-13	0.00917093	0.0654824	0	0	8.37742	39.3045	RTCB;CSTF2;ZBTB8OS
positive regulation of neuron death (GO:1901216)	1938-05-01	0.00964903	0.0687143	0	0	4.23825	19.6693	CDK5;FYN;MAPT;SNCA;PICALM
regulation of endothelial cell migration (GO:0010594)	1969-07-01	0.00985025	0.0699627	0	0	3.16261	14.6121	BCAS3;BMPR2;PDCD6;PRKCA;FGF1;BCAR1;RHOB
calcium ion transmembrane transport (GO:0070588)	1986-08-01	0.00994905	0.070479	0	0	2.87479	13.2536	FKBP1A;CACNB3;TRPV2;ATP2B4;ATP2A2;CACNA1A;SLC8A1;SLC8A2
inorganic cation import across plasma membrane (GO:0098659)	2021-04-25	0.0101752	0.0711472	0	0	5.32367	24.424	ATP2B4;SLC8A1;SLC9A1;PICALM
neutral amino acid transport (GO:0015804)	44311	0.0101752	0.0711472	0	0	5.32367	24.424	SLC7A5;SLC6A7;SLC6A17;SLC7A8
regulation of ryanodine-sensitive calcium-release channel activity (GO:0060314)	44311	0.0101752	0.0711472	0	0	5.32367	24.424	FKBP1A;GSTO1;PDE4D;SRI
response to amyloid-beta (GO:1904645)	2021-04-25	0.0101752	0.0711472	0	0	5.32367	24.424	CACNB1;CDK5;CACNA1A;FYN
negative regulation of insulin receptor signaling pathway (GO:0046627)	2021-04-25	0.0101752	0.0711472	0	0	5.32367	24.424	RPS6KB1;TSC2;TSC1;NCK1
positive regulation of cell migration (GO:0030335)	15/221	0.0104863	0.0731332	0	0	2.04827	9.33538	RET;CARMIL2;DMTN;BMPR2;PRKCE;PRKCA;FGF1;PAK1;APC;RAPGEF2;PLAA;PFN1;WASHC1;BCAR1;CLASP2
cytoskeleton-dependent cytokinesis (GO:0061640)	1970-07-01	0.0106267	0.0737311	0	0	3.11224	14.1432	PDCD6IP;APC;CHMP4B;SPIRE1;ANK3;RHOA;RHOB
calcium-mediated signaling (GO:0019722)	1970-07-01	0.0106267	0.0737311	0	0	3.11224	14.1432	PRKAA1;DMTN;ATP2A2;ADGRL1;ANK2;SLC8A1;SLC9A1
organonitrogen compound biosynthetic process (GO:1901566)	13/181	0.0106747	0.0738746	0	0	2.17462	9.87251	ACHE;DDC;CHKB;GCH1;GSTO1;MGST3;AKR1A1;GLS;GSTZ1;TH;GSTA4;ESD;CEPT1
purine ribonucleoside monophosphate metabolic process (GO:0009167)	1939-05-01	0.0107595	0.0740814	0	0	4.11338	18.6417	ADSL;ATIC;OLA1;GMPS;GART
inositol lipid-mediated signaling (GO:0048017)	14366	0.0107595	0.0740814	0	0	4.11338	18.6417	INPP5F;RPS6KB1;GAB2;OGT;RHOA
divalent metal ion transport (GO:0070838)	1988-08-01	0.0113529	0.0767528	0	0	2.80262	12.5509	CACNB3;CHRNA4;CAMK2A;CACNA1B;CACNA1A;SLC3A2;FYN;ATP2B2
regulation of Golgi organization (GO:1903358)	44269	0.011375	0.0767528	0	0	7.61545	34.0893	CAMSAP3;MAP2K1;EHD3
neurotransmitter biosynthetic process (GO:0042136)	44269	0.011375	0.0767528	0	0	7.61545	34.0893	ACHE;DAGLB;SLC6A3
regulation of extracellular matrix disassembly (GO:0010715)	2021-03-14	0.011375	0.0767528	0	0	7.61545	34.0893	CARMIL2;FSCN1;CLASP2
negative regulation of focal adhesion assembly (GO:0051895)	2021-03-14	0.011375	0.0767528	0	0	7.61545	34.0893	BCAS3;DMTN;CLASP2
cellular protein complex disassembly (GO:0043624)	2021-03-14	0.011375	0.0767528	0	0	7.61545	34.0893	NAPA;NAPB;GSPT1
RNA splicing, via endonucleolytic cleavage and ligation (GO:0000394)	2021-03-14	0.011375	0.0767528	0	0	7.61545	34.0893	RTCB;CSTF2;ZBTB8OS
positive regulation of heart rate (GO:0010460)	2021-03-14	0.011375	0.0767528	0	0	7.61545	34.0893	PDE4D;ATP2A2;SCN3B
T cell receptor signaling pathway (GO:0050852)	12/163	0.0115452	0.0777072	0	0	2.23204	9.95821	PSMD9;PAK1;PSMD5;PSMD2;PDE4D;UBE2N;FYN;PSMF1;PAK3;PAG1;BCAR1;NCK1
nucleotide biosynthetic process (GO:0009165)	2021-04-26	0.0117017	0.0781757	0	0	5.08142	22.6023	GUCY2C;ADSL;ADCY9;ADCY1
negative regulation of cellular response to insulin stimulus (GO:1900077)	44312	0.0117017	0.0781757	0	0	5.08142	22.6023	RPS6KB1;TSC2;TSC1;NCK1
regulation of cardiac muscle cell contraction (GO:0086004)	2021-04-26	0.0117017	0.0781757	0	0	5.08142	22.6023	PDE4D;ATP2A2;ANK2;SRI
regulation of cellular localization (GO:0060341)	14732	0.0119542	0.0794688	0	0	3.99565	17.6874	RIMS1;CAMK2A;CPLX2;CPLX1;SYN1
regulation of protein dephosphorylation (GO:0035304)	14732	0.0119542	0.0794688	0	0	3.99565	17.6874	PPP1R7;PPP6R3;TIPRL;PPP2R5A;TSC1
negative regulation of cellular process (GO:0048523)	29/534	0.0120191	0.0797038	0	0	1.62355	7.17814	PTPRU;BMPR2;PPP1R13B;NDRG3;CTBP1;CUL2;SNX12;ADAM22;STK39;AKR1B1;ENO1;PARK7;PPP2CA;CHMP1A;PLXNA1;APBB1;NCK1;MAP2K1;VPS13C;TSC2;TSC1;MIF;RHOB;IMPACT;APC;HGS;WNK2;RAPGEF2;CHMP4B
viral life cycle (GO:0019058)	9/107	0.0121456	0.0803456	0	0	2.57518	11.3586	RAB1A;TSG101;PDCD6IP;CTBP1;RAB1B;CHMP4B;WWP1;VPS37A;RAN
regulation of phosphatase activity (GO:0010921)	26481	0.0123114	0.0812431	0	0	3.01617	13.2628	CAMSAP3;WNK1;PPP6R3;TIPRL;SLC7A14;MPHOSPH10;TSC1
phosphatidylinositol-mediated signaling (GO:0048015)	20607	0.0127289	0.0835896	0	0	3.3586	14.6565	INPP5F;RPS6KB1;GAB2;NYAP2;OGT;RHOA
autophagosome organization (GO:1905037)	1956-06-01	0.0127289	0.0835896	0	0	3.3586	14.6565	ATG3;RAB1A;PACS2;RAB1B;WIPI2;ATG7
positive regulation of cell division (GO:0051781)	1941-05-01	0.0132358	0.0864972	0	0	3.88445	16.7996	CDC42;PRKCE;GIPC1;FGF1;RHOA
regulation of protein localization (GO:0032880)	15097	0.0132358	0.0864972	0	0	3.88445	16.7996	FKBP1A;MAPK8;ATCAY;AAK1;PICALM
endocytic recycling (GO:0032456)	44313	0.0133678	0.08673	0	0	4.86024	20.9715	EHD1;SNX4;EHD3;EHD4
positive regulation of substrate adhesion-dependent cell spreading (GO:1900026)	2021-04-27	0.0133678	0.08673	0	0	4.86024	20.9715	CDC42;DMTN;RAC1;CRK
protein targeting to vacuole (GO:0006623)	2021-04-27	0.0133678	0.08673	0	0	4.86024	20.9715	AP3M1;HGS;VPS13C;AP3D1
regulation of cell motility (GO:2000145)	9/109	0.0135966	0.0880031	0	0	2.52342	10.8455	CAMSAP3;SLK;INPP5F;PLXNA1;RAC1;PHPT1;CRK;RHOA;RHOB
negative regulation of adherens junction organization (GO:1903392)	2021-03-15	0.0138575	0.0888394	0	0	6.98046	29.8689	BCAS3;DMTN;CLASP2
negative regulation of platelet-derived growth factor receptor signaling pathway (GO:0010642)	2021-03-15	0.0138575	0.0888394	0	0	6.98046	29.8689	NDRG4;HGS;SNCA
mitochondrion localization (GO:0051646)	2021-03-15	0.0138575	0.0888394	0	0	6.98046	29.8689	ATCAY;MFN2;MARK2
cellular biogenic amine biosynthetic process (GO:0042401)	2021-03-15	0.0138575	0.0888394	0	0	6.98046	29.8689	DDC;SMS;SRM
regulated exocytosis (GO:0045055)	11/148	0.0142515	0.091149	0	0	2.25347	9.57924	RIMS1;SYNGR1;SCCPDH;STXBP1;DNAJC5;OLA1;RAB27B;RAB11FIP2;SYNGR3;ALDOA;VAMP2
regulation of GTPase activity (GO:0043087)	13/188	0.0143058	0.0912798	0	0	2.08687	8.86313	GPSM1;BCAS3;OCRL;BCR;ABR;ARHGAP21;PLXNA1;RAPGEF2;CRK;RGS6;RGS7;TBC1D10B;PICALM
regulation of cell migration (GO:0030334)	19/316	0.0147438	0.0938529	0	0	1.80158	7.59712	RET;PTPRU;CARMIL2;PRKCA;FGF1;RHOA;ROBO1;RHOB;CAMSAP3;PAK1;SLK;APC;DPYSL3;PLXNA1;RAC1;WASHC1;SRGAP1;ARPIN;BCAR1
negative regulation of proteasomal protein catabolic process (GO:1901799)	2021-04-28	0.0151774	0.0957097	0	0	4.65749	19.5053	GIPC1;PARK7;PSMF1;OGT
positive regulation of cell communication (GO:0010647)	44314	0.0151774	0.0957097	0	0	4.65749	19.5053	LGI1;RIMS1;SYT1;ANK3
cGMP metabolic process (GO:0046068)	44314	0.0151774	0.0957097	0	0	4.65749	19.5053	GUCY2C;ADCY9;PDE2A;ADCY1
calcium ion import (GO:0070509)	2021-04-28	0.0151774	0.0957097	0	0	4.65749	19.5053	CACNA1B;CACNA1A;ATP2A2;SLC8A1
negative regulation of protein metabolic process (GO:0051248)	15827	0.01607	0.0992593	0	0	3.67963	15.1998	AGAP2;SNX12;FLOT2;FMN2;APBB1
substantia nigra development (GO:0021762)	1943-05-01	0.01607	0.0992593	0	0	3.67963	15.1998	CDC42;DYNLL1;SYNGR3;ACTB;RHOA
protein repair (GO:0030091)	2021-02-06	0.0164353	0.0992593	0	0	13.9465	57.2969	PCMT1;MSRA
polyamine biosynthetic process (GO:0006596)	2021-02-06	0.0164353	0.0992593	0	0	13.9465	57.2969	SMS;SRM
transmembrane receptor protein tyrosine phosphatase signaling pathway (GO:0007185)	44233	0.0164353	0.0992593	0	0	13.9465	57.2969	PTPRD;PTPRU
catecholamine transport (GO:0051937)	2021-02-06	0.0164353	0.0992593	0	0	13.9465	57.2969	SLC6A3;SLC18A2
positive regulation of podosome assembly (GO:0071803)	2021-02-06	0.0164353	0.0992593	0	0	13.9465	57.2969	FSCN1;ASAP1
positive regulation of fibroblast migration (GO:0010763)	2021-02-06	0.0164353	0.0992593	0	0	13.9465	57.2969	DMTN;PRKCE
regulation of hyaluronan biosynthetic process (GO:1900125)	44233	0.0164353	0.0992593	0	0	13.9465	57.2969	CLTC;AP2A1
positive regulation of microtubule motor activity (GO:2000576)	2021-02-06	0.0164353	0.0992593	0	0	13.9465	57.2969	DYNLL1;DYNLL2
regulation of cellular carbohydrate catabolic process (GO:0043471)	44233	0.0164353	0.0992593	0	0	13.9465	57.2969	TIGAR;PGAM1
GDP-mannose metabolic process (GO:0019673)	44233	0.0164353	0.0992593	0	0	13.9465	57.2969	GMDS;MPI
polyphosphate metabolic process (GO:0006797)	2021-02-06	0.0164353	0.0992593	0	0	13.9465	57.2969	ATCAY;PRUNE2
endosome to lysosome transport via multivesicular body sorting pathway (GO:0032510)	2021-02-06	0.0164353	0.0992593	0	0	13.9465	57.2969	LYST;UBXN6
dendritic spine maintenance (GO:0097062)	44233	0.0164353	0.0992593	0	0	13.9465	57.2969	PICK1;FYN
regulation of dopamine secretion (GO:0014059)	44271	0.0166229	0.0992593	0	0	6.44317	26.3975	CHRNA4;KCNA2;SNCA
positive regulation of regulated secretory pathway (GO:1903307)	44271	0.0166229	0.0992593	0	0	6.44317	26.3975	RAB3A;RAB3D;STX1A
negative regulation of response to wounding (GO:1903035)	2021-03-16	0.0166229	0.0992593	0	0	6.44317	26.3975	PTPRS;INPP5F;CRK
regulation of reactive oxygen species biosynthetic process (GO:1903426)	44271	0.0166229	0.0992593	0	0	6.44317	26.3975	PARK7;SLC18A2;SNCA
neuromuscular process (GO:0050905)	44271	0.0166229	0.0992593	0	0	6.44317	26.3975	PRRT2;AGTPBP1;GCH1
dendritic spine morphogenesis (GO:0060997)	2021-03-16	0.0166229	0.0992593	0	0	6.44317	26.3975	CDC42;CTNND2;PAK3
activation of protein kinase A activity (GO:0034199)	2021-03-16	0.0166229	0.0992593	0	0	6.44317	26.3975	ADCY9;ADCY1;PRKACB
ruffle organization (GO:0031529)	2021-03-16	0.0166229	0.0992593	0	0	6.44317	26.3975	CYFIP1;ARFIP2;RAC1
neurotransmitter transport (GO:0006836)	2021-03-16	0.0166229	0.0992593	0	0	6.44317	26.3975	SNAP25;SYNJ1;SLC18A2
cilium organization (GO:0044782)	13/192	0.0167675	0.0999019	0	0	2.03981	8.33938	IQCB1;ARL6;OCRL;ASAP1;DYNLL1;DYNLL2;EHD1;EHD3;ABLIM1;ABLIM3;ATP6V0D1;ATP6V1D;SNAP29
cardiac muscle cell action potential (GO:0086001)	2021-04-29	0.0171341	0.101414	0	0	4.47096	18.182	ANK2;SCN3B;SLC8A1;SCN1A
coenzyme biosynthetic process (GO:0009108)	44315	0.0171341	0.101414	0	0	4.47096	18.182	SPR;GCH1;PTS;COASY
amino acid transmembrane transport (GO:0003333)	2021-04-29	0.0171341	0.101414	0	0	4.47096	18.182	SLC7A5;SLC6A7;SLC7A8;SLC3A2
MAPK cascade (GO:0000165)	17/278	0.0175363	0.103568	0	0	1.83232	7.40894	RET;MAP2K1;CAMK2A;RANBP9;PEBP1;BRAF;FGF1;SPTB;PSMD9;MAPK8;PSMD5;PSMD2;TAOK2;RAPGEF2;FYN;PSMF1;LAMTOR3
regulation of dendrite morphogenesis (GO:0048814)	1944-05-01	0.0176275	0.103653	0	0	3.58509	14.4776	PTPRD;RAP2A;CDK5;SDC2;RAPGEF2
positive regulation of intracellular transport (GO:0032388)	1944-05-01	0.0176275	0.103653	0	0	3.58509	14.4776	EHD1;BCAS3;HIP1R;GAB2;VAMP2
regulation of apoptotic process (GO:0042981)	40/815	0.0177198	0.103969	0	0	1.46244	5.89815	RET;ARF4;PRKAA1;PPP1R13B;STK39;FAIM2;FMN2;PARK7;ABR;PIDD1;BAG4;PAK1;MAPK8;SLK;FYN;ERC1;RAC1;APBB1;PAK3;ATG7;SNCA;MAP2K4;MAP2K1;HIP1R;BRAF;MIF;RABGGTB;RHOB;DNM2;CDK5;APC;ERCC3;RPS6KB1;BIN1;TAOK1;KCNMA1;TAOK2;MADD;WNK3;BCAR1
cellular metal ion homeostasis (GO:0006875)	1996-08-01	0.0184527	0.108034	0	0	2.54678	10.1681	KCNMA1;ATP2B4;ATP2A2;ANK2;ATP2B2;SLC8A1;SLC8A2;SLC9A1
regulation of actin cytoskeleton reorganization (GO:2000249)	2021-04-30	0.0192411	0.112015	0	0	4.29877	16.9832	CDC42;BCAS3;CDK5;PHPT1
cyclic purine nucleotide metabolic process (GO:0052652)	2021-04-30	0.0192411	0.112015	0	0	4.29877	16.9832	GUCY2C;ADCY9;AMPD2;ADCY1
protein autophosphorylation (GO:0046777)	12/175	0.0192571	0.112015	0	0	2.06642	8.16211	PAK1;SLK;WNK2;CAMK4;TAOK1;WNK3;CAMK2A;TAOK2;STK39;AAK1;FYN;MARK2
microtubule nucleation (GO:0007020)	2021-03-17	0.0196741	0.112739	0	0	5.98263	23.5025	RANBP9;SLAIN2;CLASP2
negative regulation of phosphoprotein phosphatase activity (GO:0032515)	44272	0.0196741	0.112739	0	0	5.98263	23.5025	FKBP1A;PPP4R4;TIPRL
positive regulation of calcium ion transmembrane transporter activity (GO:1901021)	2021-03-17	0.0196741	0.112739	0	0	5.98263	23.5025	GSTO1;ANK2;SLC9A1
regulation of cardiac muscle contraction by regulation of the release of sequestered calcium ion (GO:0010881)	2021-03-17	0.0196741	0.112739	0	0	5.98263	23.5025	GSTO1;ANK2;SLC8A1
cellular monovalent inorganic cation homeostasis (GO:0030004)	44272	0.0196741	0.112739	0	0	5.98263	23.5025	KCNMA1;SLC8A1;SLC9A1
membrane depolarization during cardiac muscle cell action potential (GO:0086012)	44272	0.0196741	0.112739	0	0	5.98263	23.5025	ANK2;SCN3B;SLC8A1
mitotic G2 DNA damage checkpoint (GO:0007095)	2021-03-17	0.0196741	0.112739	0	0	5.98263	23.5025	BRSK1;TAOK1;TAOK2
response to calcium ion (GO:0051592)	29037	0.0197245	0.112789	0	0	2.72194	10.686	DMTN;SYT1;PEF1;PDCD6;KCNMA1;BRAF;ADCY1
regulation of translational initiation (GO:0006446)	1962-06-01	0.020272	0.115675	0	0	2.99782	11.687	IMPACT;RPS6KB1;EIF4EBP2;EIF4B;NCK1;PAIP1
positive regulation of neuron differentiation (GO:0045666)	1998-08-01	0.0206356	0.117254	0	0	2.48993	9.66275	RET;NDRG4;IMPACT;DPYSL3;STMN2;RAPGEF2;MARK2;RHOA
positive regulation of cell growth (GO:0030307)	36008	0.0206356	0.117254	0	0	2.48993	9.66275	CDC42;LGI1;RIMS1;SYT3;SYT1;PLAA;MAPT;SYT17
protein complex disassembly (GO:0043241)	16923	0.0210344	0.11877	0	0	3.40986	13.1675	TSG101;APC;DVL2;SNAP29;TECPR1
positive regulation of protein localization to cell periphery (GO:1904377)	16923	0.0210344	0.11877	0	0	3.40986	13.1675	DPP10;KIF5B;PRKCE;WNK3;PTPN9
negative regulation of autophagy (GO:0010507)	16923	0.0210344	0.11877	0	0	3.40986	13.1675	NRBP2;TSC1;ATG7;WASHC1;SNCA
renal water homeostasis (GO:0003091)	11414	0.0215014	0.12037	0	0	4.13935	15.8936	ADCY9;ADCY1;RAB11FIP2;PRKACB
positive regulation of protein serine/threonine kinase activity (GO:0071902)	9/118	0.0217505	0.12037	0	0	2.31398	8.85818	PPP2CA;MAP2K1;SYAP1;ATP2B4;RAPGEF2;FGF1;RHOA;ROBO1;SNCA
negative regulation of cell death (GO:0060548)	1981-07-01	0.0223151	0.12037	0	0	2.6481	10.0694	IMPACT;TIGAR;CDK5;CHMP4B;PARK7;NCK1;SNCA
purine nucleotide biosynthetic process (GO:0006164)	2021-02-07	0.0224849	0.12037	0	0	11.1566	42.3385	ADSL;AMPD2
rRNA-containing ribonucleoprotein complex export from nucleus (GO:0071428)	2021-02-07	0.0224849	0.12037	0	0	11.1566	42.3385	TSC1;RAN
regulation of endocytic recycling (GO:2001135)	2021-02-07	0.0224849	0.12037	0	0	11.1566	42.3385	EHD1;INPP5F
positive regulation of mast cell degranulation (GO:0043306)	2021-02-07	0.0224849	0.12037	0	0	11.1566	42.3385	SNX4;GAB2
phosphorylated carbohydrate dephosphorylation (GO:0046838)	2021-02-07	0.0224849	0.12037	0	0	11.1566	42.3385	SYNJ1;INPP1
fructose metabolic process (GO:0006000)	44234	0.0224849	0.12037	0	0	11.1566	42.3385	AKR1B1;ALDOA
negative regulation of nitrogen compound metabolic process (GO:0051172)	2021-02-07	0.0224849	0.12037	0	0	11.1566	42.3385	CLTC;AP2A1
attachment of GPI anchor to protein (GO:0016255)	44234	0.0224849	0.12037	0	0	11.1566	42.3385	PIGT;GPAA1
inositol phosphate dephosphorylation (GO:0046855)	44234	0.0224849	0.12037	0	0	11.1566	42.3385	SYNJ1;INPP1
regulation of collateral sprouting (GO:0048670)	2021-02-07	0.0224849	0.12037	0	0	11.1566	42.3385	PTPRS;DCC
negative regulation of axon regeneration (GO:0048681)	2021-02-07	0.0224849	0.12037	0	0	11.1566	42.3385	PTPRS;INPP5F
regulation of NADP metabolic process (GO:1902031)	2021-02-07	0.0224849	0.12037	0	0	11.1566	42.3385	TIGAR;PGAM1
SA node cell action potential (GO:0086015)	2021-02-07	0.0224849	0.12037	0	0	11.1566	42.3385	ANK2;SCN3B
regulation of microtubule binding (GO:1904526)	2021-02-07	0.0224849	0.12037	0	0	11.1566	42.3385	PPP2CA;PPP2CB
fructose 1,6-bisphosphate metabolic process (GO:0030388)	2021-02-07	0.0224849	0.12037	0	0	11.1566	42.3385	TIGAR;ALDOA
cleavage furrow formation (GO:0036089)	2021-02-07	0.0224849	0.12037	0	0	11.1566	42.3385	SPIRE1;RHOA
response to increased oxygen levels (GO:0036296)	2021-02-07	0.0224849	0.12037	0	0	11.1566	42.3385	ATP6V1A;ATP6V0D1
regulation of cellular response to insulin stimulus (GO:1900076)	2021-02-07	0.0224849	0.12037	0	0	11.1566	42.3385	TSC2;OGT
microglial cell activation (GO:0001774)	2021-02-07	0.0224849	0.12037	0	0	11.1566	42.3385	MAPT;SNCA
cAMP catabolic process (GO:0006198)	2021-02-07	0.0224849	0.12037	0	0	11.1566	42.3385	PDE4D;PDE2A
mitotic cell cycle phase transition (GO:0044772)	14/221	0.0224918	0.12037	0	0	1.89959	7.20818	CETN2;CUL2;CAMK2A;DYNLL1;GSPT1;DNM2;EPS8;PPP1CB;RPS6KB1;CHMP4B;PLCB1;CDK14;EIF4E;CLASP2
regulation of organelle assembly (GO:1902115)	1947-05-01	0.0228879	0.12037	0	0	3.3285	12.5722	ATG3;TSG101;PDCD6IP;RAB1B;STAM
positive regulation of organelle assembly (GO:1902117)	1947-05-01	0.0228879	0.12037	0	0	3.3285	12.5722	SH3GLB1;LRSAM1;PDCD6IP;FSCN1;ASAP1
cellular response to heat (GO:0034605)	17288	0.0228879	0.12037	0	0	3.3285	12.5722	HSPA4;PDCD6;HSPA2;MAPT;FGF1
cellular response to metal ion (GO:0071248)	8/100	0.0229958	0.12037	0	0	2.43554	9.18795	MAPK8;TIGAR;DMTN;SYT1;BRAF;ANK3;ADCY1;SNCA
actin filament polymerization (GO:0030041)	44273	0.0230125	0.12037	0	0	5.5835	21.0594	RAC1;WASF1;WASF3
ubiquitin-dependent protein catabolic process via the multivesicular body sorting pathway (GO:0043162)	2021-03-18	0.0230125	0.12037	0	0	5.5835	21.0594	TSG101;PLAA;VPS37A
negative regulation of protein dephosphorylation (GO:0035308)	2021-03-18	0.0230125	0.12037	0	0	5.5835	21.0594	FKBP1A;PPP4R4;TIPRL
negative regulation of peptidyl-serine phosphorylation (GO:0033137)	2021-03-18	0.0230125	0.12037	0	0	5.5835	21.0594	DMTN;PDE4D;NCK1
positive regulation of actin cytoskeleton reorganization (GO:2000251)	2021-03-18	0.0230125	0.12037	0	0	5.5835	21.0594	CDC42;BCAS3;CDK5
regulation of cAMP-mediated signaling (GO:0043949)	2021-03-18	0.0230125	0.12037	0	0	5.5835	21.0594	PEX5L;PDE2A;RAPGEF2
regulation of microtubule polymerization or depolymerization (GO:0031110)	2021-03-18	0.0230125	0.12037	0	0	5.5835	21.0594	CAMSAP3;MAPT;CLASP2
establishment of epithelial cell polarity (GO:0090162)	2021-03-18	0.0230125	0.12037	0	0	5.5835	21.0594	CDC42;CAMSAP3;RHOA
glyceraldehyde-3-phosphate metabolic process (GO:0019682)	44273	0.0230125	0.12037	0	0	5.5835	21.0594	ALDH1A1;PHACTR1;PGD
[truncated: 2,184 more rows]

## Sheet: Str__694_GO_MF
Term	Overlap	P-value	Adjusted P-value	Old P-value	Old Adjusted P-value	Odds Ratio	Combined Score	Genes
[truncated: 579 more rows]

[truncated: 4 more sheets: Str_694_GO_CC, VM_373_COMPART, Str_694_COMPART, VM_or_Str_1713_COMPART]
