# Supplementary material for: Subcellular proteomics of dopamine neurons in the mouse brain
Source: eLife. 2022 Jan 31;11:e70921. doi: 10.7554/eLife.70921 (PMC8860448; doi:10.7554/eLife.70921)
Supplement: Figure 4—source data 2. [file elife-70921-fig4-data2.xlsx]

## Sheet: APEX_not_Cortex
Genes	ProteinDescriptions	ProteinNames	VM_A_avg	MFB_A_avg	Str_A_avg
Syngr3	Synaptogyrin-3	SNG3_MOUSE	8.75585	9.64529	13.5976
Atp1a2	Sodium/potassium-transporting ATPase subunit alpha-2	AT1A2_MOUSE	11.1773	10.2986	11.9316
Sncg	Gamma-synuclein	SYUG_MOUSE	8.99063	8.90054	11.7066
Tubb6	Tubulin beta-6 chain	TBB6_MOUSE	12.5079	11.2703	11.6177
Slc18a2	Synaptic vesicular amine transporter	VMAT2_MOUSE	7.03057	7.07841	11.3683
Ddc	Aromatic-L-amino-acid decarboxylase	DDC_MOUSE	9.49786	8.57337	11.2922
Tuba3a	Tubulin alpha-3 chain	TBA3_MOUSE	12.4021	10.9041	11.2898
Anxa7	Annexin A7	ANXA7_MOUSE	8.92972	8.69406	11.2659
Th	Tyrosine 3-monooxygenase	TY3H_MOUSE	8.88846	8.34577	11.1657
Ubb;Ubc;Rps27a;Uba52	Polyubiquitin-B;Polyubiquitin-C;Ubiquitin-40S ribosomal protein S27a;Ubiquitin-60S ribosomal protein L40	UBB_MOUSE;UBC_MOUSE;RS27A_MOUSE;RL40_MOUSE	10.4403	10.4044	11.0877
Atp6v1a	V-type proton ATPase catalytic subunit A	VATA_MOUSE	8.9323	7.94802	11.029
Slc6a3	Sodium-dependent dopamine transporter	SC6A3_MOUSE	8.11288	7.75458	11.0019
Sv2c	Synaptic vesicle glycoprotein 2C	SV2C_MOUSE	7.00008	6.91493	10.9535
Aldh1a1	Retinal dehydrogenase 1	AL1A1_MOUSE	7.35859	7.26505	10.8937
Pidd1	p53-induced death domain-containing protein 1	PIDD1_MOUSE	8.76118	7.69964	10.6185
Sri	Sorcin;Isoform 2 of Sorcin	SORCN_MOUSE	7.14691	7.37608	10.5828
Tubb1	Tubulin beta-1 chain	TBB1_MOUSE	11.7824	10.3317	10.5823
Actb	Actin, cytoplasmic 1	ACTB_MOUSE	9.24018	8.51934	10.5662
Cttn	Src substrate cortactin	SRC8_MOUSE	9.58318	8.02725	10.4109
Sptbn1	Spectrin beta chain, non-erythrocytic 1	SPTB2_MOUSE	9.60397	8.82061	10.3178
Dnajc6	Putative tyrosine-protein phosphatase auxilin	AUXI_MOUSE	7.67838	7.10283	10.2472
Septin7	Septin-7	SEPT7_MOUSE	7.45844	7.22575	10.2097
Atp5pf	ATP synthase-coupling factor 6, mitochondrial	ATP5J_MOUSE	9.85882	9.88237	10.154
Arf3;Arf1	ADP-ribosylation factor 3;ADP-ribosylation factor 1	ARF3_MOUSE;ARF1_MOUSE	8.11117	7.37906	10.0802
Ank2	Isoform 2 of Ankyrin-2	ANK2_MOUSE	7.2095	8.29215	10.0648
Cbarp	Voltage-dependent calcium channel beta subunit-associated regulatory protein	CBARP_MOUSE	7.92616	4.67731	10.0366
Usp5	Ubiquitin carboxyl-terminal hydrolase 5	UBP5_MOUSE	9.11146	7.91708	9.99618
Atp5f1a	ATP synthase subunit alpha, mitochondrial	ATPA_MOUSE	9.76539	9.85438	9.91183
Atp6v1h	V-type proton ATPase subunit H	VATH_MOUSE	7.59218	6.86659	9.88536
Napg	Gamma-soluble NSF attachment protein	SNAG_MOUSE	7.8835	7.10021	9.71668
Pygm	Glycogen phosphorylase, muscle form	PYGM_MOUSE	9.16469	8.12381	9.66655
Tppp	Tubulin polymerization-promoting protein	TPPP_MOUSE	7.76984	7.96208	9.56895
Rab5a	Ras-related protein Rab-5A	RAB5A_MOUSE	9.40225	7.92969	9.54555
Tom1l2	TOM1-like protein 2;Isoform 2 of TOM1-like protein 2	TM1L2_MOUSE	8.65508	7.0987	9.47086
Wasf3	Wiskott-Aldrich syndrome protein family member 3	WASF3_MOUSE	7.09096	6.50528	9.4292
Ap3b2	AP-3 complex subunit beta-2	AP3B2_MOUSE	7.36976	6.40811	9.39384
Mal2	Protein MAL2	MAL2_MOUSE	7.11858	7.5789	9.38778
C1qa	Complement C1q subcomponent subunit A	C1QA_MOUSE	6.27016	5.65653	9.38741
Ppp2ca	Serine/threonine-protein phosphatase 2A catalytic subunit alpha isoform	PP2AA_MOUSE	8.18422	7.29514	9.30706
Scrn3	Secernin-3	SCRN3_MOUSE	6.81784	7.13319	9.30287
Pcbp1	Poly(rC)-binding protein 1	PCBP1_MOUSE	7.80184	6.9811	9.28651
Ap2a1	AP-2 complex subunit alpha-1;Isoform B of AP-2 complex subunit alpha-1	AP2A1_MOUSE	8.09554	7.48592	9.26622
Atp6v0d1	V-type proton ATPase subunit d 1	VA0D1_MOUSE	6.55916	6.25917	9.26221
Hspa12a	Heat shock 70 kDa protein 12A	HS12A_MOUSE	9.16092	7.76941	9.19632
Hspa1b;Hspa1a	Heat shock 70 kDa protein 1B;Heat shock 70 kDa protein 1A	HS71B_MOUSE;HS71A_MOUSE	8.88964	7.58444	9.17382
Ckap4	Cytoskeleton-associated protein 4	CKAP4_MOUSE	7.89741	7.58204	9.16284
Septin5	Septin-5	SEPT5_MOUSE	6.83755	6.57382	9.10834
Atp5f1b	ATP synthase subunit beta, mitochondrial	ATPB_MOUSE	8.57817	8.98192	9.10764
Cct8	T-complex protein 1 subunit theta	TCPQ_MOUSE	8.88316	7.15046	9.09866
Mgst3	Microsomal glutathione S-transferase 3	MGST3_MOUSE	8.22169	7.26148	9.08003
Iqsec1	IQ motif and SEC7 domain-containing protein 1;Isoform 2 of IQ motif and SEC7 domain-containing protein 1	IQEC1_MOUSE	8.20702	6.90249	9.07024
Pgm2l1	Glucose 1,6-bisphosphate synthase	PGM2L_MOUSE	7.84659	7.15005	9.03928
Calm1;Calm2;Calm3	Calmodulin-1;Calmodulin-2;Calmodulin-3	CALM1_MOUSE;CALM2_MOUSE;CALM3_MOUSE	10.3423	8.91935	9.02681
Ighmbp2	DNA-binding protein SMUBP-2	SMBP2_MOUSE	5.41364	5.37358	9.01048
Dmtn	Dematin	DEMA_MOUSE	7.96379	7.26826	8.96713
Hapln2	Hyaluronan and proteoglycan link protein 2	HPLN2_MOUSE	8.84967	9.99922	8.96042
Phpt1	14 kDa phosphohistidine phosphatase	PHP14_MOUSE	7.14069	6.43416	8.92382
Cadps2	Isoform 2 of Calcium-dependent secretion activator 2;Isoform 3 of Calcium-dependent secretion activator 2	CAPS2_MOUSE	7.50415	6.45056	8.89892
Adgrl1	Adhesion G protein-coupled receptor L1;Isoform 2 of Adhesion G protein-coupled receptor L1	AGRL1_MOUSE	6.84548	5.65375	8.85895
Ube2h	Ubiquitin-conjugating enzyme E2 H	UBE2H_MOUSE	7.85589	7.19456	8.80352
Actr1b	Beta-centractin	ACTY_MOUSE	8.40753	7.01485	8.78402
Smap2	Stromal membrane-associated protein 2	SMAP2_MOUSE	7.94736	6.79101	8.77566
Scamp4	Secretory carrier-associated membrane protein 4	SCAM4_MOUSE	4.76587	4.39298	8.72493
Gdap1l1	Ganglioside-induced differentiation-associated protein 1-like 1	GD1L1_MOUSE	6.89515	6.0811	8.69809
Zc2hc1a	Zinc finger C2HC domain-containing protein 1A	ZC21A_MOUSE	6.99122	7.06247	8.69584
Snx12	Sorting nexin-12	SNX12_MOUSE	7.69754	6.61957	8.6821
Stam	Signal transducing adapter molecule 1	STAM1_MOUSE	7.39387	6.06678	8.6328
Ank3	Ankyrin-3;Isoform 2 of Ankyrin-3;Isoform 3 of Ankyrin-3	ANK3_MOUSE	6.32006	6.62973	8.61622
Ahcyl2	Putative adenosylhomocysteinase 3	SAHH3_MOUSE	9.2561	7.23618	8.61195
Rab6b	Ras-related protein Rab-6B	RAB6B_MOUSE	6.88466	6.49152	8.60256
Mtch2	Mitochondrial carrier homolog 2	MTCH2_MOUSE	8.67257	7.20445	8.59775
Syt17	Synaptotagmin-17	SYT17_MOUSE	4.80674	4.80021	8.58322
Dmxl2	DmX-like protein 2;Isoform 2 of DmX-like protein 2	DMXL2_MOUSE	6.48894	5.78544	8.58131
Vat1l	Synaptic vesicle membrane protein VAT-1 homolog-like	VAT1L_MOUSE	6.59638	5.97164	8.57556
Ppp2r1a	Serine/threonine-protein phosphatase 2A 65 kDa regulatory subunit A alpha isoform	2AAA_MOUSE	8.16496	7.04717	8.56178
Ret	Proto-oncogene tyrosine-protein kinase receptor Ret	RET_MOUSE	5.82479	5.64155	8.56148
Adam22	Isoform 9 of Disintegrin and metalloproteinase domain-containing protein 22;Isoform 12 of Disintegrin and metalloproteinase domain-containing protein 22	ADA22_MOUSE	5.93063	5.59549	8.54181
Plin4	Perilipin-4;Isoform 2 of Perilipin-4	PLIN4_MOUSE	9.71389	6.05506	8.51802
Slc10a4	Sodium/bile acid cotransporter 4	NTCP4_MOUSE	4.68582	4.14352	8.51652
Cpne3	Copine-3	CPNE3_MOUSE	8.58008	8.00213	8.49354
Tpd52	Tumor protein D52;Isoform 2 of Tumor protein D52;Isoform 3 of Tumor protein D52	TPD52_MOUSE	5.33419	5.33909	8.48637
Cyfip2	Cytoplasmic FMR1-interacting protein 2	CYFP2_MOUSE	6.97197	6.26379	8.47363
Klc2	Kinesin light chain 2	KLC2_MOUSE	6.11444	5.79571	8.46058
Pcbp2	Poly(rC)-binding protein 2;Isoform 2 of Poly(rC)-binding protein 2	PCBP2_MOUSE	8.49412	7.0113	8.3884
Diras1	GTP-binding protein Di-Ras1	DIRA1_MOUSE	6.99322	6.09157	8.38129
Tubb4a	Tubulin beta-4A chain	TBB4A_MOUSE	10.0758	8.48427	8.35986
Dnajc12	DnaJ homolog subfamily C member 12	DJC12_MOUSE	5.72054	5.21357	8.34833
Eif4b	Eukaryotic translation initiation factor 4B	IF4B_MOUSE	6.98104	6.37206	8.31345
Septin6	Septin-6;Isoform I of Septin-6;Isoform V of Septin-6	SEPT6_MOUSE	6.04628	5.79981	8.31143
Pdcd6	Programmed cell death protein 6	PDCD6_MOUSE	6.25024	5.68854	8.29544
Nwd2	NACHT and WD repeat domain-containing protein 2	NWD2_MOUSE	5.72282	5.10567	8.28794
Gbe1	1,4-alpha-glucan-branching enzyme	GLGB_MOUSE	6.33711	5.90358	8.28002
Epb41l3	Band 4.1-like protein 3;Isoform 2 of Band 4.1-like protein 3;Isoform 3 of Band 4.1-like protein 3	E41L3_MOUSE	8.69763	8.30648	8.27775
Hspa4l	Heat shock 70 kDa protein 4L	HS74L_MOUSE	7.63809	6.2595	8.26023
Rap2a	Ras-related protein Rap-2a	RAP2A_MOUSE	7.03357	5.44916	8.24941
Paip1	Polyadenylate-binding protein-interacting protein 1	PAIP1_MOUSE	6.59981	5.62822	8.24279
Col4a2	Collagen alpha-2(IV) chain	CO4A2_MOUSE	4.7587	1.97451	8.24142
Syt7	Isoform 4 of Synaptotagmin-7	SYT7_MOUSE	5.62062	5.26456	8.23959
Agpat1	1-acyl-sn-glycerol-3-phosphate acyltransferase alpha	PLCA_MOUSE	4.22558	4.4853	8.19778
Wipf2	WAS/WASL-interacting protein family member 2	WIPF2_MOUSE	7.11658	6.90697	8.18416
Abi2	Abl interactor 2	ABI2_MOUSE	6.20646	5.2494	8.17493
Ankrd34b	Ankyrin repeat domain-containing protein 34B	AN34B_MOUSE	8.17015	6.90196	8.16896
Usp9x	Probable ubiquitin carboxyl-terminal hydrolase FAF-X	USP9X_MOUSE	7.51685	6.48045	8.15989
Ndufa4	Cytochrome c oxidase subunit NDUFA4	NDUA4_MOUSE	7.2222	7.39952	8.15524
Ubfd1	Ubiquitin domain-containing protein UBFD1	UBFD1_MOUSE	6.74145	5.90295	8.12464
Ppa1	Inorganic pyrophosphatase	IPYR_MOUSE	7.392	6.33862	8.09454
Eif3j1	Eukaryotic translation initiation factor 3 subunit J-A	EI3JA_MOUSE	8.72632	8.45947	8.08446
Cacnb4	Voltage-dependent L-type calcium channel subunit beta-4;Isoform 1 of Voltage-dependent L-type calcium channel subunit beta-4;Isoform 2 of Voltage-dependent L-type calcium channel subunit beta-4	CACB4_MOUSE	5.89592	4.82271	8.07776
Palmd	Palmdelphin	PALMD_MOUSE	7.10542	6.32784	8.05806
Scamp3	Secretory carrier-associated membrane protein 3	SCAM3_MOUSE	4.73659	4.78548	8.01809
Ehd4	EH domain-containing protein 4	EHD4_MOUSE	5.50457	5.16176	8.00512
Gnpda1	Glucosamine-6-phosphate isomerase 1	GNPI1_MOUSE	6.32777	5.39595	7.99883
Itgb5	Integrin beta-5	ITB5_MOUSE	6.98383	5.88444	7.98697
Slc2a1	Solute carrier family 2, facilitated glucose transporter member 1	GTR1_MOUSE	6.68464	6.18701	7.98426
Glul	Glutamine synthetase	GLNA_MOUSE	7.92604	7.32565	7.98409
Usp14	Ubiquitin carboxyl-terminal hydrolase 14	UBP14_MOUSE	7.20585	5.91296	7.98337
Ctnna2	Catenin alpha-2;Isoform 2 of Catenin alpha-2	CTNA2_MOUSE	7.65388	5.83397	7.98336
Slc25a22	Mitochondrial glutamate carrier 1	GHC1_MOUSE	7.07863	7.18326	7.97409
Vps26b	Vacuolar protein sorting-associated protein 26B	VP26B_MOUSE	8.31456	6.00782	7.96655
Kank4	KN motif and ankyrin repeat domain-containing protein 4	KANK4_MOUSE	5.13697	5.22031	7.9665
Ube2v1	Ubiquitin-conjugating enzyme E2 variant 1	UB2V1_MOUSE	6.26704	5.87215	7.90835
Smap1	Stromal membrane-associated protein 1	SMAP1_MOUSE	5.7133	5.18093	7.8817
Lysmd2	LysM and putative peptidoglycan-binding domain-containing protein 2	LYSM2_MOUSE	5.14874	5.08603	7.86733
Psd3	PH and SEC7 domain-containing protein 3;Isoform 2 of PH and SEC7 domain-containing protein 3	PSD3_MOUSE	8.69344	7.84018	7.86726
Atp5md	ATP synthase membrane subunit DAPIT, mitochondrial	ATPMD_MOUSE	5.90204	6.33715	7.86488
Cdip1	Cell death-inducing p53-target protein 1;Isoform 2 of Cell death-inducing p53-target protein 1	CDIP1_MOUSE	6.47384	5.83144	7.83198
Slc4a4	Electrogenic sodium bicarbonate cotransporter 1	S4A4_MOUSE	8.18223	6.74495	7.82967
Eps15l1	Epidermal growth factor receptor substrate 15-like 1	EP15R_MOUSE	7.8794	5.89633	7.82944
Grhpr	Glyoxylate reductase/hydroxypyruvate reductase	GRHPR_MOUSE	6.76123	5.84974	7.8196
Kif21a	Isoform 2 of Kinesin-like protein KIF21A	KI21A_MOUSE	7.03245	5.92383	7.81949
Hip1r	Huntingtin-interacting protein 1-related protein	HIP1R_MOUSE	6.61315	4.91781	7.80632
Atp5me	ATP synthase subunit e, mitochondrial	ATP5I_MOUSE	6.83611	7.15966	7.80259
Slc25a12	Calcium-binding mitochondrial carrier protein Aralar1	CMC1_MOUSE	8.96492	7.19474	7.77504
Tbcb	Tubulin-folding cofactor B	TBCB_MOUSE	6.58639	6.10365	7.72843
Lancl2	LanC-like protein 2	LANC2_MOUSE	6.19947	5.48553	7.71563
Vta1	Vacuolar protein sorting-associated protein VTA1 homolog	VTA1_MOUSE	6.10763	6.20479	7.70314
Phf24	PHD finger protein 24	PHF24_MOUSE	6.13309	5.40654	7.69864
Septin11	Septin-11;Isoform 2 of Septin-11;Isoform 3 of Septin-11	SEP11_MOUSE	5.55165	5.32801	7.69723
Avl9	Late secretory pathway protein AVL9 homolog	AVL9_MOUSE	4.36238	4.2292	7.67356
Ppp2r5c	Serine/threonine-protein phosphatase 2A 56 kDa regulatory subunit gamma isoform;Isoform 1 of Serine/threonine-protein phosphatase 2A 56 kDa regulatory subunit gamma isoform;Isoform 3 of Serine/threonine-protein phosphatase 2A 56 kDa regulatory subunit gamma isoform;Isoform 4 of Serine/threonine-protein phosphatase 2A 56 kDa regulatory subunit gamma isoform	2A5G_MOUSE	7.26012	6.08669	7.67262
Septin3	Neuronal-specific septin-3;Isoform 2 of Neuronal-specific septin-3	SEPT3_MOUSE	6.15202	5.77531	7.66616
Cep170	Centrosomal protein of 170 kDa	CE170_MOUSE	6.26725	5.83636	7.63464
Atp6v1d	V-type proton ATPase subunit D	VATD_MOUSE	5.58505	4.78059	7.63309
Tomm70	Mitochondrial import receptor subunit TOM70	TOM70_MOUSE	7.15256	5.44045	7.61509
Clint1	Clathrin interactor 1	EPN4_MOUSE	7.4512	5.9378	7.56803
Cyc1	Cytochrome c1, heme protein, mitochondrial;Isoform 2 of Cytochrome c1, heme protein, mitochondrial	CY1_MOUSE	8.69062	7.19792	7.52942
Cul2	Cullin-2	CUL2_MOUSE	6.05534	4.87583	7.52417
Vwa5a	von Willebrand factor A domain-containing protein 5A	VMA5A_MOUSE	6.45088	5.97794	7.51974
NARS1	Asparagine--tRNA ligase, cytoplasmic	SYNC_MOUSE	7.73044	5.78216	7.49855
Pbdc1	Protein PBDC1	PBDC1_MOUSE	4.67984	4.82631	7.49188
Rap1gap2	Rap1 GTPase-activating protein 2	RPGP2_MOUSE	6.55199	5.40538	7.47834
Arpc4	Actin-related protein 2/3 complex subunit 4	ARPC4_MOUSE	5.74833	5.89393	7.45331
Cyrib	CYFIP-related Rac1 interactor B	CYRIB_MOUSE	6.06169	5.76141	7.45198
Ap3d1	AP-3 complex subunit delta-1	AP3D1_MOUSE	6.40807	5.29269	7.44164
Rragc	Ras-related GTP-binding protein C	RRAGC_MOUSE	7.34474	6.2806	7.4407
Mtch1	Mitochondrial carrier homolog 1;Isoform 2 of Mitochondrial carrier homolog 1	MTCH1_MOUSE	7.52596	6.4639	7.43619
Gmds	GDP-mannose 4,6 dehydratase	GMDS_MOUSE	5.56634	5.94997	7.41804
Lbh	Protein LBH	LBH_MOUSE	1.63662	0	7.41649
Kpna3	Importin subunit alpha-4	IMA4_MOUSE	6.8522	5.27818	7.39043
Abr	Active breakpoint cluster region-related protein	ABR_MOUSE	6.62796	5.83292	7.36664
Pithd1	PITH domain-containing protein 1	PITH1_MOUSE	6.08231	5.39322	7.35891
Ube2m	NEDD8-conjugating enzyme Ubc12	UBC12_MOUSE	6.09001	5.11496	7.3561
Ppp2r5e	Serine/threonine-protein phosphatase 2A 56 kDa regulatory subunit epsilon isoform	2A5E_MOUSE	7.0534	6.01003	7.35103
Tbc1d10b	TBC1 domain family member 10B	TB10B_MOUSE	5.41775	5.20239	7.35036
Kcnd3	Potassium voltage-gated channel subfamily D member 3	KCND3_MOUSE	7.40531	5.15165	7.3456
Slc38a3	Sodium-coupled neutral amino acid transporter 3	S38A3_MOUSE	5.73556	5.17946	7.3349
Agap3	Arf-GAP with GTPase, ANK repeat and PH domain-containing protein 3	AGAP3_MOUSE	6.45398	5.75735	7.32295
Washc1	WASH complex subunit 1	WASH1_MOUSE	6.84076	5.59745	7.31615
Snx30	Sorting nexin-30	SNX30_MOUSE	8.20189	9.27806	7.29219
Mpp1	55 kDa erythrocyte membrane protein	EM55_MOUSE	5.98572	5.68408	7.28524
Rap1gap	Rap1 GTPase-activating protein 1;Isoform 2 of Rap1 GTPase-activating protein 1;Isoform 3 of Rap1 GTPase-activating protein 1	RPGP1_MOUSE	6.94213	5.51992	7.26971
Mad1l1	Mitotic spindle assembly checkpoint protein MAD1;Isoform 2 of Mitotic spindle assembly checkpoint protein MAD1	MD1L1_MOUSE	6.30639	5.06343	7.24144
Ubqln2	Ubiquilin-2	UBQL2_MOUSE	6.40361	5.37858	7.23771
Gng3	Guanine nucleotide-binding protein G(I)/G(S)/G(O) subunit gamma-3	GBG3_MOUSE	7.41587	5.95396	7.22787
Chmp7	Charged multivesicular body protein 7;Isoform 2 of Charged multivesicular body protein 7	CHMP7_MOUSE	6.68554	3.48255	7.21578
Nckipsd	NCK-interacting protein with SH3 domain	SPN90_MOUSE	6.68546	4.84809	7.21246
Kiaa0513	Uncharacterized protein KIAA0513	K0513_MOUSE	5.27044	4.24372	7.21077
Mapk1ip1l	MAPK-interacting and spindle-stabilizing protein-like	MISSL_MOUSE	5.96976	6.16338	7.18811
Mtss2	Protein MTSS 2	MTSS2_MOUSE	7.53355	5.4114	7.18236
Dgkq	Diacylglycerol kinase theta	DGKQ_MOUSE	7.66814	6.82041	7.18049
Rab5c	Ras-related protein Rab-5C	RAB5C_MOUSE	7.16261	5.11991	7.17729
Ube3a	Ubiquitin-protein ligase E3A;Isoform 2 of Ubiquitin-protein ligase E3A	UBE3A_MOUSE	6.79287	5.09582	7.17563
Braf	Serine/threonine-protein kinase B-raf	BRAF_MOUSE	5.99717	4.81291	7.16245
Nebl	LIM zinc-binding domain-containing Nebulette	LNEBL_MOUSE	6.53061	5.0547	7.15565
Stk11	Serine/threonine-protein kinase STK11;Isoform 2 of Serine/threonine-protein kinase STK11	STK11_MOUSE	6.92089	4.26915	7.14101
Sgsm1	Small G protein signaling modulator 1	SGSM1_MOUSE	5.13556	5.60153	7.12782
Plcxd3	PI-PLC X domain-containing protein 3	PLCX3_MOUSE	6.014	5.20252	7.12594
Coasy	Bifunctional coenzyme A synthase	COASY_MOUSE	5.77399	4.91837	7.11011
Cpne7	Copine-7	CPNE7_MOUSE	6.99332	5.5952	7.10486
Ahcyl1	S-adenosylhomocysteine hydrolase-like protein 1	SAHH2_MOUSE	8.05393	5.91371	7.09176
Tmem263	Transmembrane protein 263	TM263_MOUSE	1.30579	4.5106	7.09133
Hpca	Neuron-specific calcium-binding protein hippocalcin	HPCA_MOUSE	8.03404	6.55929	7.09047
Kiaa1210	Acrosomal protein KIAA1210	K1210_MOUSE	5.96783	5.1452	7.08558
Rab5b	Ras-related protein Rab-5B	RAB5B_MOUSE	7.32433	6.10349	7.08374
Diras2	GTP-binding protein Di-Ras2	DIRA2_MOUSE	5.55432	2.43444	7.07516
Map2k4	Dual specificity mitogen-activated protein kinase kinase 4	MP2K4_MOUSE	5.95633	4.98921	7.07247
Rap2c	Ras-related protein Rap-2c	RAP2C_MOUSE	5.99827	4.68034	7.05958
Hacd3	Very-long-chain (3R)-3-hydroxyacyl-CoA dehydratase 3	HACD3_MOUSE	6.25004	6.18739	7.05522
Cdk14	Cyclin-dependent kinase 14;Isoform 2 of Cyclin-dependent kinase 14	CDK14_MOUSE	5.82762	5.10309	7.04187
Ahcy	Adenosylhomocysteinase	SAHH_MOUSE	6.27488	5.93016	7.03436
Prxl2b	Prostamide/prostaglandin F synthase	PXL2B_MOUSE	5.19058	4.65867	7.01948
Mpp6	Isoform Alpha of MAGUK p55 subfamily member 6	MPP6_MOUSE	10.2196	7.60334	7.01828
Wdr47	WD repeat-containing protein 47	WDR47_MOUSE	5.70565	5.46445	7.00953
Slc12a2	Solute carrier family 12 member 2	S12A2_MOUSE	5.59571	5.09486	7.00236
Cntnap4	Contactin-associated protein-like 4	CNTP4_MOUSE	5.48819	5.25956	6.99524
Ddx3x	ATP-dependent RNA helicase DDX3X	DDX3X_MOUSE	8.29648	6.55404	6.97305
Arpin	Arpin	ARPIN_MOUSE	5.59024	3.20261	6.96498
Ptgr2	Prostaglandin reductase 2;Isoform 2 of Prostaglandin reductase 2	PTGR2_MOUSE	5.89825	5.34142	6.94021
Cystm1	Cysteine-rich and transmembrane domain-containing protein 1	CYTM1_MOUSE	3.84287	3.4414	6.93829
Mphosph10	U3 small nucleolar ribonucleoprotein protein MPP10	MPP10_MOUSE	3.49444	1.64389	6.93186
Mdp1	Magnesium-dependent phosphatase 1	MGDP1_MOUSE	5.0304	3.45289	6.93164
Ablim1	Isoform 2 of Actin-binding LIM protein 1;Isoform 4 of Actin-binding LIM protein 1	ABLM1_MOUSE	5.85555	5.27851	6.93119
Rgs6	Regulator of G-protein signaling 6	RGS6_MOUSE	5.30865	4.0062	6.9303
Agfg2	Arf-GAP domain and FG repeat-containing protein 2;Isoform 2 of Arf-GAP domain and FG repeat-containing protein 2	AGFG2_MOUSE	5.90526	4.80674	6.92335
Wnk2	Isoform 3 of Serine/threonine-protein kinase WNK2;Isoform 4 of Serine/threonine-protein kinase WNK2;Isoform 5 of Serine/threonine-protein kinase WNK2;Isoform 6 of Serine/threonine-protein kinase WNK2;Isoform 7 of Serine/threonine-protein kinase WNK2	WNK2_MOUSE	5.44749	5.37876	6.91968
Nol3	Nucleolar protein 3	NOL3_MOUSE	7.41113	5.91471	6.91463
Snx2	Sorting nexin-2	SNX2_MOUSE	6.8356	4.88153	6.91372
Gdap1	Ganglioside-induced differentiation-associated protein 1	GDAP1_MOUSE	7.51146	5.21002	6.87282
Psmd4	26S proteasome non-ATPase regulatory subunit 4;Isoform Rpn10B of 26S proteasome non-ATPase regulatory subunit 4	PSMD4_MOUSE	6.75054	4.77186	6.87015
Prune1	Exopolyphosphatase PRUNE1	PRUN1_MOUSE	7.95773	7.91167	6.85573
Sars1	Serine--tRNA ligase, cytoplasmic	SYSC_MOUSE	7.31158	5.90957	6.84599
Ppfia2	Liprin-alpha-2	LIPA2_MOUSE	5.26541	5.03407	6.83957
Atp5f1c	ATP synthase subunit gamma, mitochondrial	ATPG_MOUSE	6.59013	6.76318	6.83539
Robo2	Roundabout homolog 2	ROBO2_MOUSE	4.75173	3.9864	6.8276
Cops6	COP9 signalosome complex subunit 6	CSN6_MOUSE	6.11829	4.7633	6.80263
Atp5pb	ATP synthase F(0) complex subunit B1, mitochondrial	AT5F1_MOUSE	5.96651	6.39327	6.78798
Snx1	Sorting nexin-1	SNX1_MOUSE	6.75344	4.6287	6.76816
Fam126b	Protein FAM126B;Isoform 2 of Protein FAM126B	F126B_MOUSE	6.00948	4.22077	6.76282
Fbxo2	F-box only protein 2	FBX2_MOUSE	7.94216	5.69439	6.76061
Cd82	CD82 antigen	CD82_MOUSE	5.14399	4.76899	6.75478
Adss2	Adenylosuccinate synthetase isozyme 2	PURA2_MOUSE	5.11024	3.56434	6.75291
Rnf11	RING finger protein 11	RNF11_MOUSE	5.97385	5.54493	6.74943
Tsn	Translin	TSN_MOUSE	5.78868	4.97299	6.74452
Syap1	Synapse-associated protein 1	SYAP1_MOUSE	5.25921	4.71228	6.73846
Tspan7	Tetraspanin-7	TSN7_MOUSE	6.74303	4.8743	6.73804
Chmp4b	Charged multivesicular body protein 4b	CHM4B_MOUSE	5.77648	5.10806	6.72934
Ahsa1	Activator of 90 kDa heat shock protein ATPase homolog 1	AHSA1_MOUSE	6.28534	4.9769	6.72472
Gspt1	Eukaryotic peptide chain release factor GTP-binding subunit ERF3A;Isoform 2 of Eukaryotic peptide chain release factor GTP-binding subunit ERF3A	ERF3A_MOUSE	5.5987	5.32725	6.71893
Bcas3	Breast carcinoma-amplified sequence 3 homolog	BCAS3_MOUSE	4.83032	3.02924	6.70894
Ndufv1	NADH dehydrogenase [ubiquinone] flavoprotein 1, mitochondrial	NDUV1_MOUSE	6.17988	5.52817	6.69883
Hspa2	Heat shock-related 70 kDa protein 2	HSP72_MOUSE	5.28124	4.25131	6.69091
Ap1g1	AP-1 complex subunit gamma-1	AP1G1_MOUSE	6.33185	4.96246	6.68994
Fam177a1	Protein FAM177A1	F177A_MOUSE	5.35572	5.58246	6.66589
Cct6a	T-complex protein 1 subunit zeta	TCPZ_MOUSE	7.20278	5.6807	6.66406
Trappc12	Trafficking protein particle complex subunit 12	TPC12_MOUSE	6.62574	6.62628	6.66125
Vps51	Vacuolar protein sorting-associated protein 51 homolog	VPS51_MOUSE	5.72953	4.77364	6.66098
Rabgef1	Rab5 GDP/GTP exchange factor	RABX5_MOUSE	6.39519	5.47361	6.65583
Rhot1	Mitochondrial Rho GTPase 1;Isoform 2 of Mitochondrial Rho GTPase 1;Isoform 3 of Mitochondrial Rho GTPase 1;Isoform 4 of Mitochondrial Rho GTPase 1	MIRO1_MOUSE	6.58114	4.94812	6.6557
Map7d1	MAP7 domain-containing protein 1	MA7D1_MOUSE	6.92405	5.77933	6.65418
Reps2	RalBP1-associated Eps domain-containing protein 2	REPS2_MOUSE	6.55621	4.91909	6.64741
Srm	Spermidine synthase	SPEE_MOUSE	5.45705	5.17297	6.64233
Npepps	Puromycin-sensitive aminopeptidase	PSA_MOUSE	6.26406	5.47911	6.64144
Serpinb6	Serpin B6	SPB6_MOUSE	4.51881	2.42032	6.63976
Dynlt3	Dynein light chain Tctex-type 3	DYLT3_MOUSE	7.35705	6.98979	6.63578
Enah	Protein enabled homolog;Isoform 3 of Protein enabled homolog;Isoform 4 of Protein enabled homolog	ENAH_MOUSE	5.45362	4.00709	6.63264
Ipo7	Importin-7	IPO7_MOUSE	6.09208	3.20435	6.62138
Mtap	S-methyl-5'-thioadenosine phosphorylase	MTAP_MOUSE	5.40086	4.51804	6.61954
Agpat3	1-acyl-sn-glycerol-3-phosphate acyltransferase gamma	PLCC_MOUSE	6.03891	5.98035	6.61922
Rnf14	E3 ubiquitin-protein ligase RNF14	RNF14_MOUSE	7.47646	5.53274	6.60267
Cpne2	Copine-2	CPNE2_MOUSE	6.2666	5.40662	6.59276
Slc12a6	Solute carrier family 12 member 6	S12A6_MOUSE	5.31193	3.00124	6.58665
Gpr37	Prosaposin receptor GPR37;Isoform 2 of Prosaposin receptor GPR37;Isoform 3 of Prosaposin receptor GPR37	GPR37_MOUSE	5.68566	1.35417	6.55079
Kif1a	Kinesin-like protein KIF1A	KIF1A_MOUSE	6.9807	6.00701	6.53494
Tmem47	Transmembrane protein 47	TMM47_MOUSE	4.3296	2.21427	6.53154
Rgs20	Regulator of G-protein signaling 20	RGS20_MOUSE	3.76748	1.95864	6.5163
Sec24a	Protein transport protein Sec24A	SC24A_MOUSE	4.21439	3.84972	6.50926
Cmbl	Carboxymethylenebutenolidase homolog	CMBL_MOUSE	4.67846	3.58005	6.49893
Tax1bp1	Tax1-binding protein 1 homolog	TAXB1_MOUSE	5.23544	3.66117	6.49435
Rab33b	Ras-related protein Rab-33B	RB33B_MOUSE	0	1.51669	6.49056
Mettl26	Methyltransferase-like 26	MTL26_MOUSE	3.93766	5.60371	6.48749
Larp1	La-related protein 1	LARP1_MOUSE	6.677	5.38617	6.48747
Spag9	C-Jun-amino-terminal kinase-interacting protein 4;Isoform 2 of C-Jun-amino-terminal kinase-interacting protein 4	JIP4_MOUSE	6.5453	5.30833	6.48529
Eipr1	EARP and GARP complex-interacting protein 1	EIPR1_MOUSE	5.88667	4.4819	6.48478
Cops5	COP9 signalosome complex subunit 5	CSN5_MOUSE	6.15907	4.87515	6.47777
Ttpal	Alpha-tocopherol transfer protein-like	TTPAL_MOUSE	2.29774	1.28195	6.47318
Gsdme	Gasdermin-E	GSDME_MOUSE	5.28281	4.13648	6.45584
Cd2ap	CD2-associated protein	CD2AP_MOUSE	4.43359	3.73764	6.45257
Tanc2	Protein TANC2;Isoform 2 of Protein TANC2	TANC2_MOUSE	4.79621	4.1943	6.44411
Ube2q1	Ubiquitin-conjugating enzyme E2 Q1;Isoform 2 of Ubiquitin-conjugating enzyme E2 Q1	UB2Q1_MOUSE	6.54551	5.79722	6.44055
Wdr13	WD repeat-containing protein 13	WDR13_MOUSE	5.57311	4.09667	6.43407
Cyth3;Cyth2;Cyth2;Cyth2;Cyth1;Cyth1	Cytohesin-3;Cytohesin-2;Isoform 2 of Cytohesin-2;Isoform 3 of Cytohesin-2;Cytohesin-1;Isoform 2 of Cytohesin-1	CYH3_MOUSE;CYH2_MOUSE;CYH2_MOUSE;CYH2_MOUSE;CYH1_MOUSE;CYH1_MOUSE	6.02331	4.60077	6.41519
Arhgap21	Rho GTPase-activating protein 21	RHG21_MOUSE	3.22754	4.69085	6.41175
Apoo	MICOS complex subunit Mic26;Isoform 2 of MICOS complex subunit Mic26;Isoform 3 of MICOS complex subunit Mic26	MIC26_MOUSE	7.17239	5.64078	6.40054
Slc5a7	High affinity choline transporter 1	SC5A7_MOUSE	0	0	6.38992
Armc1	Armadillo repeat-containing protein 1	ARMC1_MOUSE	6.06408	3.77862	6.37871
Slc6a9	Sodium- and chloride-dependent glycine transporter 1;Isoform GlyT-1A of Sodium- and chloride-dependent glycine transporter 1;Isoform GlyT-1B of Sodium- and chloride-dependent glycine transporter 1	SC6A9_MOUSE	6.3617	5.13649	6.37499
Eif4g3	Eukaryotic translation initiation factor 4 gamma 3;Isoform 2 of Eukaryotic translation initiation factor 4 gamma 3;Isoform 3 of Eukaryotic translation initiation factor 4 gamma 3;Isoform 4 of Eukaryotic translation initiation factor 4 gamma 3	IF4G3_MOUSE	6.58953	4.79097	6.37456
Nipsnap1	Protein NipSnap homolog 1	NIPS1_MOUSE	6.3507	5.88091	6.37152
Upf1	Regulator of nonsense transcripts 1;Isoform 2 of Regulator of nonsense transcripts 1	RENT1_MOUSE	7.1412	5.07521	6.36806
Coro2b	Coronin-2B	COR2B_MOUSE	5.43412	4.34081	6.36459
Nipal3	NIPA-like protein 3	NPAL3_MOUSE	0	0.821203	6.35731
Dusp3	Dual specificity protein phosphatase 3	DUS3_MOUSE	4.14865	3.86608	6.35631
Trappc10	Trafficking protein particle complex subunit 10	TPC10_MOUSE	5.94919	3.61686	6.35278
Chrna4	Neuronal acetylcholine receptor subunit alpha-4	ACHA4_MOUSE	4.82019	3.69616	6.34513
Ranbp1	Ran-specific GTPase-activating protein	RANG_MOUSE	5.4031	4.95481	6.34223
Reep2	Receptor expression-enhancing protein 2	REEP2_MOUSE	4.79642	4.20563	6.33354
Ppp2r5a	Serine/threonine-protein phosphatase 2A 56 kDa regulatory subunit alpha isoform	2A5A_MOUSE	4.96316	2.04349	6.32345
Trappc9	Trafficking protein particle complex subunit 9;Isoform 2 of Trafficking protein particle complex subunit 9	TPPC9_MOUSE	6.10206	3.86704	6.31959
Clcn6	Chloride transport protein 6	CLCN6_MOUSE	7.10212	4.97755	6.31816
Efr3b	Protein EFR3 homolog B	EFR3B_MOUSE	5.64957	4.8686	6.31798
Carmil2	Isoform 2 of Capping protein, Arp2/3 and myosin-I linker protein 2	CARL2_MOUSE	3.44327	3.56114	6.31691
Rptor	Regulatory-associated protein of mTOR	RPTOR_MOUSE	5.73655	3.60481	6.3093
Arhgap6	Rho GTPase-activating protein 6;Isoform 2 of Rho GTPase-activating protein 6;Isoform 3 of Rho GTPase-activating protein 6;Isoform 4 of Rho GTPase-activating protein 6	RHG06_MOUSE	5.5206	4.52935	6.2999
Ttyh3	Protein tweety homolog 3	TTYH3_MOUSE	8.07131	0.507687	6.29658
Gga3	ADP-ribosylation factor-binding protein GGA3	GGA3_MOUSE	4.71861	3.01577	6.29212
Cpne4	Copine-4	CPNE4_MOUSE	5.01317	4.72718	6.27796
Coro2a	Coronin-2A	COR2A_MOUSE	6.07436	4.37192	6.27487
Sh3bgrl2	SH3 domain-binding glutamic acid-rich-like protein 2	SH3L2_MOUSE	5.56387	5.62966	6.27336
Kcnn3	Small conductance calcium-activated potassium channel protein 3	KCNN3_MOUSE	5.03704	2.16024	6.25748
Gng4	Guanine nucleotide-binding protein G(I)/G(S)/G(O) subunit gamma-4	GBG4_MOUSE	5.85847	3.76212	6.25544
Jpt2	Jupiter microtubule associated homolog 2	JUPI2_MOUSE	3.1778	5.24409	6.23885
Bcr	Breakpoint cluster region protein	BCR_MOUSE	5.23295	4.22821	6.23255
Fn3krp	Ketosamine-3-kinase	KT3K_MOUSE	4.39244	5.01098	6.22832
Ube2k	Ubiquitin-conjugating enzyme E2 K	UBE2K_MOUSE	5.31618	4.45715	6.22091
Spart	Spartin;Isoform 2 of Spartin	SPART_MOUSE	4.27359	3.61765	6.21044
Slc35g2	Solute carrier family 35 member G2	S35G2_MOUSE	3.91346	3.82992	6.20403
Ube2o	(E3-independent) E2 ubiquitin-conjugating enzyme UBE2O	UBE2O_MOUSE	6.79086	4.82353	6.19203
Stat5b	Signal transducer and activator of transcription 5B	STA5B_MOUSE	5.46587	4.73047	6.18965
Wdr37	WD repeat-containing protein 37	WDR37_MOUSE	4.69625	3.80349	6.18668
Mtmr1	Myotubularin-related protein 1	MTMR1_MOUSE	4.61719	3.86005	6.18349
Cab39	Calcium-binding protein 39	CAB39_MOUSE	6.40747	5.20131	6.17867
Gsta4	Glutathione S-transferase A4	GSTA4_MOUSE	5.0129	4.85322	6.17781
Elfn2	Protein phosphatase 1 regulatory subunit 29	PPR29_MOUSE	8.29022	4.30402	6.17759
Tial1	Nucleolysin TIAR	TIAR_MOUSE	7.30403	4.82892	6.17539
Nyap2	Neuronal tyrosine-phosphorylated phosphoinositide-3-kinase adapter 2;Isoform 2 of Neuronal tyrosine-phosphorylated phosphoinositide-3-kinase adapter 2;Isoform 3 of Neuronal tyrosine-phosphorylated phosphoinositide-3-kinase adapter 2;Isoform 4 of Neuronal tyrosine-phosphorylated phosphoinositide-3-kinase adapter 2;Isoform 5 of Neuronal tyrosine-phosphorylated phosphoinositide-3-kinase adapter 2	NYAP2_MOUSE	4.12328	3.65653	6.17001
Ptrhd1	Putative peptidyl-tRNA hydrolase PTRHD1	PTRD1_MOUSE	0	0	6.1662
Snx6	Sorting nexin-6	SNX6_MOUSE	6.33485	4.66172	6.16614
Ramac	RNA guanine-N7 methyltransferase activating subunit	RAMAC_MOUSE	5.27407	4.47655	6.16403
Bmpr2	Bone morphogenetic protein receptor type-2	BMPR2_MOUSE	3.24602	1.94481	6.16368
Fam171a2	Protein FAM171A2	F1712_MOUSE	5.11337	3.96935	6.16124
Ptprd	Receptor-type tyrosine-protein phosphatase delta;Isoform C of Receptor-type tyrosine-protein phosphatase delta;Isoform J of Receptor-type tyrosine-protein phosphatase delta;Isoform K of Receptor-type tyrosine-protein phosphatase delta;Isoform L of Receptor-type tyrosine-protein phosphatase delta;Isoform A of Receptor-type tyrosine-protein phosphatase delta;Isoform B of Receptor-type tyrosine-prot…	PTPRD_MOUSE	3.36897	1.70209	6.15869
Map7d2	MAP7 domain-containing protein 2	MA7D2_MOUSE	6.87971	7.05893	6.15133
Spire1	Protein spire homolog 1;Isoform 2 of Protein spire homolog 1;Isoform 3 of Protein spire homolog 1	SPIR1_MOUSE	4.79081	2.42647	6.15132
Tnpo1	Transportin-1;Isoform 2 of Transportin-1	TNPO1_MOUSE	5.65616	4.45492	6.14709
Numb	Protein numb homolog;Isoform 2 of Protein numb homolog;Isoform 3 of Protein numb homolog;Isoform 4 of Protein numb homolog	NUMB_MOUSE	5.293	3.66464	6.1459
Gpd1l	Glycerol-3-phosphate dehydrogenase 1-like protein;Isoform 2 of Glycerol-3-phosphate dehydrogenase 1-like protein	GPD1L_MOUSE	4.97505	4.99636	6.14125
Afdn	Afadin	AFAD_MOUSE	5.74358	4.20573	6.13455
Ndufb11	NADH dehydrogenase [ubiquinone] 1 beta subcomplex subunit 11, mitochondrial	NDUBB_MOUSE	4.92005	3.31282	6.13342
Ube2l3	Ubiquitin-conjugating enzyme E2 L3	UB2L3_MOUSE	5.33838	5.17519	6.12468
Mtmr6	Myotubularin-related protein 6;Isoform 2 of Myotubularin-related protein 6	MTMR6_MOUSE	4.59683	2.32547	6.11754
Tcp11l1	T-complex protein 11-like protein 1	T11L1_MOUSE	5.24578	3.99726	6.116
Fn3k	Fructosamine-3-kinase	FN3K_MOUSE	5.41069	3.74652	6.1131
Prxl2a	Peroxiredoxin-like 2A	PXL2A_MOUSE	5.43681	5.91086	6.10461
Camsap3	Calmodulin-regulated spectrin-associated protein 3;Isoform 10 of Calmodulin-regulated spectrin-associated protein 3;Isoform 11 of Calmodulin-regulated spectrin-associated protein 3;Isoform 12 of Calmodulin-regulated spectrin-associated protein 3;Isoform 14 of Calmodulin-regulated spectrin-associated protein 3;Isoform 2 of Calmodulin-regulated spectrin-associated protein 3;Isoform 3 of Calmodulin-…	CAMP3_MOUSE	5.23143	5.13677	6.10418
Psmd5	26S proteasome non-ATPase regulatory subunit 5	PSMD5_MOUSE	6.03509	4.80028	6.0989
Drg2	Developmentally-regulated GTP-binding protein 2	DRG2_MOUSE	6.6414	5.43135	6.09734
Xpo7	Exportin-7	XPO7_MOUSE	4.75298	3.72052	6.08972
Soga3	Protein SOGA3	SOGA3_MOUSE	7.16584	5.39957	6.08967
Ralbp1	RalA-binding protein 1	RBP1_MOUSE	6.04978	5.39338	6.08735
Akt1s1	Proline-rich AKT1 substrate 1	AKTS1_MOUSE	3.27334	0	6.08446
Fbxo41	F-box only protein 41	FBX41_MOUSE	5.78823	2.49648	6.07445
Nqo2	Ribosyldihydronicotinamide dehydrogenase [quinone]	NQO2_MOUSE	2.71647	3.43714	6.07121
Snx4	Sorting nexin-4	SNX4_MOUSE	3.02124	0.890548	6.07044
Camk2n2	Calcium/calmodulin-dependent protein kinase II inhibitor 2	CK2N2_MOUSE	7.06096	3.56984	6.06552
Eri3	ERI1 exoribonuclease 3;Isoform 2 of ERI1 exoribonuclease 3	ERI3_MOUSE	5.5313	4.25245	6.05084
Cse1l	Exportin-2	XPO2_MOUSE	6.02572	5.17646	6.04857
Tmx3	Protein disulfide-isomerase TMX3	TMX3_MOUSE	7.86611	6.31281	6.04093
Rasgrf2	Ras-specific guanine nucleotide-releasing factor 2	RGRF2_MOUSE	5.21661	3.95458	6.02791
Usp46;Usp12;Usp12	Ubiquitin carboxyl-terminal hydrolase 46;Ubiquitin carboxyl-terminal hydrolase 12;Isoform 2 of Ubiquitin carboxyl-terminal hydrolase 12	UBP46_MOUSE;UBP12_MOUSE;UBP12_MOUSE	5.8922	3.47061	6.02759
Nbea	Neurobeachin;Isoform 3 of Neurobeachin;Isoform 4 of Neurobeachin	NBEA_MOUSE	5.95398	4.32931	6.02445
Dab1	Disabled homolog 1;Isoform DAB555 of Disabled homolog 1;Isoform DAB271 of Disabled homolog 1;Isoform DAB197 of Disabled homolog 1;Isoform DAB204 of Disabled homolog 1;Isoform DAB217 of Disabled homolog 1;Isoform DAB553 of Disabled homolog 1	DAB1_MOUSE	3.49384	0.872834	6.02103
Septin8	Septin-8;Isoform 2 of Septin-8	SEPT8_MOUSE	5.16666	4.7683	6.0206
Mapk8ip3	C-Jun-amino-terminal kinase-interacting protein 3;Isoform 1a of C-Jun-amino-terminal kinase-interacting protein 3;Isoform 1b of C-Jun-amino-terminal kinase-interacting protein 3;Isoform 1d of C-Jun-amino-terminal kinase-interacting protein 3;Isoform 1e of C-Jun-amino-terminal kinase-interacting protein 3	JIP3_MOUSE	4.17459	3.998	6.00917
Slc7a14	Probable cationic amino acid transporter	S7A14_MOUSE	4.36834	4.31637	6.00891
Alg2	Alpha-1,3/1,6-mannosyltransferase ALG2	ALG2_MOUSE	7.89251	5.56127	6.00651
Ptpa	Serine/threonine-protein phosphatase 2A activator	PTPA_MOUSE	5.38663	5.07103	6.00465
Eif4g1	Eukaryotic translation initiation factor 4 gamma 1	IF4G1_MOUSE	6.80718	5.60314	6.00393
Arih1	E3 ubiquitin-protein ligase ARIH1	ARI1_MOUSE	5.30605	3.84233	6.00105
Bad	Bcl2-associated agonist of cell death	BAD_MOUSE	1.12597	0	6.00041
Icam5	Intercellular adhesion molecule 5	ICAM5_MOUSE	1.56642	0.872778	5.97792
Uba6	Ubiquitin-like modifier-activating enzyme 6	UBA6_MOUSE	5.37949	4.50289	5.97429
Ccny	Cyclin-Y;Isoform 2 of Cyclin-Y	CCNY_MOUSE	5.79549	1.13243	5.96808
Ddhd1	Phospholipase DDHD1;Isoform 2 of Phospholipase DDHD1	DDHD1_MOUSE	3.87509	0.934418	5.96292
Fgf1	Fibroblast growth factor 1	FGF1_MOUSE	3.35278	3.16178	5.95518
Hepacam	Hepatocyte cell adhesion molecule	HECAM_MOUSE	4.77272	4.46048	5.94756
Rnf126	E3 ubiquitin-protein ligase RNF126	RN126_MOUSE	5.1127	3.53421	5.94589
Wars1	Tryptophan--tRNA ligase, cytoplasmic;Isoform 2 of Tryptophan--tRNA ligase, cytoplasmic	SYWC_MOUSE	5.55533	4.75475	5.93961
Zbtb8os	Protein archease	ARCH_MOUSE	3.3894	0.782423	5.93728
Osbpl10	Oxysterol-binding protein-related protein 10	OSB10_MOUSE	4.54834	2.43908	5.93458
Ipo9	Importin-9	IPO9_MOUSE	4.76926	4.19132	5.91213
Sec23a	Protein transport protein Sec23A	SC23A_MOUSE	6.11033	4.32451	5.90158
S1pr1	Sphingosine 1-phosphate receptor 1	S1PR1_MOUSE	4.78489	3.22732	5.88235
Rabif	Guanine nucleotide exchange factor MSS4	MSS4_MOUSE	3.4314	2.08161	5.8728
Ablim3	Actin-binding LIM protein 3	ABLM3_MOUSE	2.80846	0.951334	5.86544
Nectin1	Nectin-1	NECT1_MOUSE	5.00688	1.01765	5.86079
Aftph	Aftiphilin;Isoform 2 of Aftiphilin	AFTIN_MOUSE	5.03296	4.28312	5.86033
Stk38l	Serine/threonine-protein kinase 38-like;Isoform 2 of Serine/threonine-protein kinase 38-like	ST38L_MOUSE	4.63928	3.10174	5.8567
C2cd2l	Phospholipid transfer protein C2CD2L	C2C2L_MOUSE	5.56441	4.45585	5.85641
Srgap1	SLIT-ROBO Rho GTPase-activating protein 1	SRGP1_MOUSE	4.76325	3.84064	5.85303
Cit	Citron Rho-interacting kinase;Isoform 3 of Citron Rho-interacting kinase;Isoform 4 of Citron Rho-interacting kinase;Isoform 5 of Citron Rho-interacting kinase	CTRO_MOUSE	7.47574	5.16977	5.85039
Sbf1	Myotubularin-related protein 5;Isoform 2 of Myotubularin-related protein 5	MTMR5_MOUSE	4.4429	3.97851	5.8407
Agap1	Arf-GAP with GTPase, ANK repeat and PH domain-containing protein 1	AGAP1_MOUSE	5.77962	5.06343	5.83789
Bcl2l13	Bcl-2-like protein 13	B2L13_MOUSE	3.62367	0	5.83432
Stat1	Signal transducer and activator of transcription 1	STAT1_MOUSE	5.68484	2.25684	5.81931
Bola2	BolA-like protein 2;Isoform 2 of BolA-like protein 2	BOLA2_MOUSE	1.96707	1.81127	5.81163
Nudcd1	NudC domain-containing protein 1	NUDC1_MOUSE	6.22471	4.13657	5.80616
Vps50	Syndetin	VPS50_MOUSE	5.2424	3.02121	5.79128
Macrod2	ADP-ribose glycohydrolase MACROD2	MACD2_MOUSE	4.3819	3.66774	5.78258
Gab1	GRB2-associated-binding protein 1	GAB1_MOUSE	0	0	5.77846
Abraxas2	BRISC complex subunit Abraxas 2	ABRX2_MOUSE	5.24532	2.48614	5.77433
Dnajb4	DnaJ homolog subfamily B member 4	DNJB4_MOUSE	5.48318	4.64405	5.77047
Specc1	Cytospin-B;Isoform 2 of Cytospin-B;Isoform 4 of Cytospin-B	CYTSB_MOUSE	7.06163	2.55608	5.76477
Usp24	Ubiquitin carboxyl-terminal hydrolase 24	UBP24_MOUSE	4.84047	2.68183	5.76274
Gatd1	Glutamine amidotransferase-like class 1 domain-containing protein 1	GALD1_MOUSE	5.26031	4.50911	5.76241
Gspt2	Eukaryotic peptide chain release factor GTP-binding subunit ERF3B	ERF3B_MOUSE	4.9809	3.06689	5.75749
Faim2	Protein lifeguard 2;Isoform 2 of Protein lifeguard 2	LFG2_MOUSE	3.19672	4.25166	5.75625
Inpp1	Inositol polyphosphate 1-phosphatase	INPP_MOUSE	4.33247	2.16081	5.75547
Adcy1	Adenylate cyclase type 1	ADCY1_MOUSE	2.78984	3.03167	5.75188
Ncoa7	Nuclear receptor coactivator 7	NCOA7_MOUSE	4.14833	2.0611	5.74507
Ajm1	Apical junction component 1 homolog	AJM1_MOUSE	5.9571	4.68018	5.73959
Kbtbd11	Kelch repeat and BTB domain-containing protein 11	KBTBB_MOUSE	5.27408	4.19478	5.73923
Rras2	Ras-related protein R-Ras2	RRAS2_MOUSE	5.04923	3.89961	5.73447
Sra1	Steroid receptor RNA activator 1	SRA1_MOUSE	0.722095	0	5.72525
Gch1	GTP cyclohydrolase 1	GCH1_MOUSE	1.57117	0	5.72326
Srpk2	SRSF protein kinase 2	SRPK2_MOUSE	6.14487	4.04268	5.71704
Mtarc2	Mitochondrial amidoxime reducing component 2	MARC2_MOUSE	5.95696	4.58017	5.71681
Stx16	Syntaxin-16	STX16_MOUSE	2.31545	2.19082	5.71272
Plxna4	Plexin-A4	PLXA4_MOUSE	5.76672	2.04551	5.71241
Wdfy3	WD repeat and FYVE domain-containing protein 3	WDFY3_MOUSE	3.93382	1.85952	5.71027
Lsm3	U6 snRNA-associated Sm-like protein LSm3	LSM3_MOUSE	5.97281	5.06198	5.69109
Strip1;Strip1;Strip1;Strip2;Strip2;Strip2	Striatin-interacting protein 1;Isoform 3 of Striatin-interacting protein 1;Isoform 4 of Striatin-interacting protein 1;Striatin-interacting proteins 2;Isoform 3 of Striatin-interacting proteins 2;Isoform 2 of Striatin-interacting proteins 2	STRP1_MOUSE;STRP1_MOUSE;STRP1_MOUSE;STRP2_MOUSE;STRP2_MOUSE;STRP2_MOUSE	1.43205	0.959306	5.68828
Ndufs8	NADH dehydrogenase [ubiquinone] iron-sulfur protein 8, mitochondrial	NDUS8_MOUSE	5.6076	5.2274	5.68809
Rtl1	Retrotransposon-like protein 1	RTL1_MOUSE	4.76083	2.88733	5.68591
Pycr3	Pyrroline-5-carboxylate reductase 3	P5CR3_MOUSE	5.6942	3.41776	5.68584
Kifap3	Kinesin-associated protein 3;Isoform KAP3B of Kinesin-associated protein 3	KIFA3_MOUSE	5.57143	4.14861	5.67704
Ndufb1	NADH dehydrogenase [ubiquinone] 1 beta subcomplex subunit 1	NDUB1_MOUSE	5.65527	4.90917	5.67019
Pdlim5	PDZ and LIM domain protein 5	PDLI5_MOUSE	4.33936	4.3734	5.66568
Ppp6r2	Serine/threonine-protein phosphatase 6 regulatory subunit 2	PP6R2_MOUSE	3.90498	2.84058	5.66009
Pacs2	Phosphofurin acidic cluster sorting protein 2	PACS2_MOUSE	4.27372	2.84762	5.65561
Gapvd1	GTPase-activating protein and VPS9 domain-containing protein 1;Isoform 2 of GTPase-activating protein and VPS9 domain-containing protein 1;Isoform 4 of GTPase-activating protein and VPS9 domain-containing protein 1;Isoform 6 of GTPase-activating protein and VPS9 domain-containing protein 1	GAPD1_MOUSE	5.0384	2.14674	5.654
Cbl	E3 ubiquitin-protein ligase CBL	CBL_MOUSE	4.93258	4.67618	5.65292
Tmem121b	Transmembrane protein 121B	T121B_MOUSE	1.05613	0	5.64877
Stt3a	Dolichyl-diphosphooligosaccharide--protein glycosyltransferase subunit STT3A	STT3A_MOUSE	4.569	3.37146	5.64028
Slain2	SLAIN motif-containing protein 2;Isoform 2 of SLAIN motif-containing protein 2	SLAI2_MOUSE	1.8963	3.29787	5.63718
MAP11	Microtubule-associated protein 11	MA11_MOUSE	5.80876	2.31424	5.63546
Adsl	Adenylosuccinate lyase	PUR8_MOUSE	3.41266	2.95929	5.63521
Rab39b	Ras-related protein Rab-39B	RB39B_MOUSE	2.46969	2.53714	5.62818
Tbc1d24	TBC1 domain family member 24;Isoform 2 of TBC1 domain family member 24	TBC24_MOUSE	2.81482	0.904467	5.62419
Oga	Protein O-GlcNAcase;Isoform 3 of Protein O-GlcNAcase	OGA_MOUSE	6.28905	4.79068	5.62293
Gprin1	G protein-regulated inducer of neurite outgrowth 1	GRIN1_MOUSE	7.8991	4.97401	5.6219
Cdc42ep4	Cdc42 effector protein 4	BORG4_MOUSE	1.99829	2.20737	5.61977
Uqcr10	Cytochrome b-c1 complex subunit 9	QCR9_MOUSE	5.52099	3.99423	5.61452
Lclat1	Lysocardiolipin acyltransferase 1	LCLT1_MOUSE	1.67508	2.21005	5.604
Fundc2	FUN14 domain-containing protein 2	FUND2_MOUSE	2.78221	3.47164	5.59507
Ube2d3;Ube2d2	Ubiquitin-conjugating enzyme E2 D3;Ubiquitin-conjugating enzyme E2 D2	UB2D3_MOUSE;UB2D2_MOUSE	4.12498	2.10984	5.5874
Actr10	Actin-related protein 10	ARP10_MOUSE	5.35229	3.60338	5.58566
Smyd5	SET and MYND domain-containing protein 5	SMYD5_MOUSE	5.03938	4.68509	5.57051
Relch	Isoform 2 of RAB11-binding protein RELCH	RELCH_MOUSE	4.65804	2.28652	5.5701
Astn1	Astrotactin-1;Isoform 2 of Astrotactin-1	ASTN1_MOUSE	5.8164	1.94681	5.56651
Ddi2	Protein DDI1 homolog 2	DDI2_MOUSE	4.14793	2.48623	5.5639
Cfap36	Cilia- and flagella-associated protein 36	CFA36_MOUSE	0	0	5.56041
Guk1	Guanylate kinase;Isoform 2 of Guanylate kinase	KGUA_MOUSE	3.52591	0.190459	5.55353
Ache	Acetylcholinesterase	ACES_MOUSE	2.62705	2.24523	5.5507
Rangap1	Ran GTPase-activating protein 1	RAGP1_MOUSE	7.18396	5.41858	5.54897
Atg2b	Autophagy-related protein 2 homolog B	ATG2B_MOUSE	5.25952	3.7383	5.54872
Gart	Trifunctional purine biosynthetic protein adenosine-3	PUR2_MOUSE	3.54083	1.17611	5.54273
Srgap3	SLIT-ROBO Rho GTPase-activating protein 3	SRGP3_MOUSE	4.57905	3.33236	5.538
Tigar	Fructose-2,6-bisphosphatase TIGAR	TIGAR_MOUSE	1.87901	2.25112	5.53518
Aatk	Serine/threonine-protein kinase LMTK1;Isoform 2 of Serine/threonine-protein kinase LMTK1;Isoform 3 of Serine/threonine-protein kinase LMTK1	LMTK1_MOUSE	5.76085	2.69852	5.53455
Grk2	Beta-adrenergic receptor kinase 1	ARBK1_MOUSE	6.21133	5.06165	5.53139
Chrnb2	Neuronal acetylcholine receptor subunit beta-2	ACHB2_MOUSE	4.24369	1.12356	5.52583
Atl2	Atlastin-2	ATLA2_MOUSE	6.65475	5.40928	5.5204
Prrt3	Proline-rich transmembrane protein 3	PRRT3_MOUSE	2.13828	2.28288	5.5186
Rab24	Ras-related protein Rab-24	RAB24_MOUSE	5.59166	2.38695	5.51684
Lrsam1	E3 ubiquitin-protein ligase LRSAM1	LRSM1_MOUSE	4.26924	3.36807	5.51514
Mia3	Transport and Golgi organization protein 1 homolog	TGO1_MOUSE	3.07876	2.00531	5.51354
Hnrnpl	Heterogeneous nuclear ribonucleoprotein L	HNRPL_MOUSE	6.72013	5.14123	5.50667
Plppr1	Phospholipid phosphatase-related protein type 1;Isoform 2 of Phospholipid phosphatase-related protein type 1	PLPR1_MOUSE	1.22337	0	5.50455
Myrip	Rab effector MyRIP	MYRIP_MOUSE	1.62178	0.658297	5.50178
Rabl6	Rab-like protein 6	RABL6_MOUSE	4.59651	4.07134	5.49601
Psmd8	26S proteasome non-ATPase regulatory subunit 8	PSMD8_MOUSE	6.039	3.26842	5.49403
Atp9a	Probable phospholipid-transporting ATPase IIA	ATP9A_MOUSE	5.71676	3.65474	5.48815
Pdzd8	PDZ domain-containing protein 8	PDZD8_MOUSE	6.10096	4.85039	5.48343
Osbp	Oxysterol-binding protein 1	OSBP1_MOUSE	4.83187	3.53708	5.48051
Mtx2	Metaxin-2	MTX2_MOUSE	6.06528	0	5.47088
Atp6v1g2	V-type proton ATPase subunit G 2	VATG2_MOUSE	4.64094	5.11437	5.46467
Cpeb3	Cytoplasmic polyadenylation element-binding protein 3;Isoform 2 of Cytoplasmic polyadenylation element-binding protein 3;Isoform 3 of Cytoplasmic polyadenylation element-binding protein 3;Isoform 4 of Cytoplasmic polyadenylation element-binding protein 3	CPEB3_MOUSE	5.33192	3.07255	5.46127
Rab11fip2	Rab11 family-interacting protein 2;Isoform 2 of Rab11 family-interacting protein 2	RFIP2_MOUSE	4.37623	3.07113	5.44954
Slc39a10	Zinc transporter ZIP10	S39AA_MOUSE	6.52586	3.25796	5.44622
Flad1	FAD synthase;Isoform 2 of FAD synthase	FAD1_MOUSE	3.36589	1.5418	5.43357
Cpne6	Copine-6	CPNE6_MOUSE	5.12159	3.44462	5.42432
Dip2a	Disco-interacting protein 2 homolog A	DIP2A_MOUSE	5.30652	4.02067	5.41828
Uvrag	UV radiation resistance-associated protein	UVRAG_MOUSE	3.78285	0.939653	5.41545
Sh3bgrl	SH3 domain-binding glutamic acid-rich-like protein	SH3L1_MOUSE	4.9632	5.50222	5.41478
Tex2	Testis-expressed protein 2	TEX2_MOUSE	5.84685	4.24642	5.41098
Pitpnm2	Membrane-associated phosphatidylinositol transfer protein 2;Isoform 2 of Membrane-associated phosphatidylinositol transfer protein 2	PITM2_MOUSE	5.32526	2.39499	5.41065
Kpna6	Importin subunit alpha-7	IMA7_MOUSE	5.39471	3.78742	5.41004
Epha4	Ephrin type-A receptor 4;Isoform Short of Ephrin type-A receptor 4	EPHA4_MOUSE	4.95961	0.964891	5.40552
Slc1a4	Neutral amino acid transporter A	SATT_MOUSE	5.91398	4.20506	5.4052
Dip2b	Disco-interacting protein 2 homolog B	DIP2B_MOUSE	4.6811	2.90842	5.40365
Ate1	Arginyl-tRNA--protein transferase 1;Isoform ATE1-2 of Arginyl-tRNA--protein transferase 1	ATE1_MOUSE	5.30673	2.84495	5.40163
Irgq	Immunity-related GTPase family Q protein	IRGQ_MOUSE	6.16449	4.85298	5.40139
Eif3l	Eukaryotic translation initiation factor 3 subunit L	EIF3L_MOUSE	8.3379	5.43233	5.39865
Ckap5	Cytoskeleton-associated protein 5;Isoform 2 of Cytoskeleton-associated protein 5;Isoform 3 of Cytoskeleton-associated protein 5	CKAP5_MOUSE	5.2461	4.39241	5.39364
Trappc6b	Trafficking protein particle complex subunit 6B	TPC6B_MOUSE	5.2597	2.12139	5.39181
Sema6d	Semaphorin-6D;Isoform 1 of Semaphorin-6D;Isoform 2 of Semaphorin-6D;Isoform 3 of Semaphorin-6D;Isoform 5 of Semaphorin-6D;Isoform 6 of Semaphorin-6D	SEM6D_MOUSE	0	0	5.39129
Abl2	Tyrosine-protein kinase ABL2	ABL2_MOUSE	5.36605	2.83892	5.39064
Vps37c	Vacuolar protein sorting-associated protein 37C	VP37C_MOUSE	3.3763	0	5.38636
Adora2a	Adenosine receptor A2a	AA2AR_MOUSE	0	0	5.37696
Ncam2	Neural cell adhesion molecule 2	NCAM2_MOUSE	6.42905	5.12176	5.36677
Adal	Adenosine deaminase-like protein;Isoform 2 of Adenosine deaminase-like protein;Isoform 4 of Adenosine deaminase-like protein	ADAL_MOUSE	4.38678	3.30432	5.36173
Usp8	Ubiquitin carboxyl-terminal hydrolase 8	UBP8_MOUSE	5.20312	2.3755	5.35267
Adcy9	Adenylate cyclase type 9	ADCY9_MOUSE	2.58905	2.92836	5.34877
Armc8	Armadillo repeat-containing protein 8;Isoform 2 of Armadillo repeat-containing protein 8;Isoform 3 of Armadillo repeat-containing protein 8	ARMC8_MOUSE	5.24988	3.10567	5.33956
Nat14	N-acetyltransferase 14	NAT14_MOUSE	0.410866	0.743901	5.33812
Tom1	Target of Myb protein 1	TOM1_MOUSE	4.98871	3.04801	5.33762
Atxn2l	Ataxin-2-like protein;Isoform 2 of Ataxin-2-like protein;Isoform 3 of Ataxin-2-like protein	ATX2L_MOUSE	6.19369	4.44992	5.33304
Epm2aip1	EPM2A-interacting protein 1	EPMIP_MOUSE	5.06377	1.76414	5.3324
Ubash3b	Ubiquitin-associated and SH3 domain-containing protein B	UBS3B_MOUSE	4.02871	1.80627	5.33051
Celf4	CUGBP Elav-like family member 4;Isoform 2 of CUGBP Elav-like family member 4;Isoform 3 of CUGBP Elav-like family member 4;Isoform 4 of CUGBP Elav-like family member 4;Isoform 5 of CUGBP Elav-like family member 4;Isoform 6 of CUGBP Elav-like family member 4	CELF4_MOUSE	7.0307	4.70519	5.33044
Fbxl17	F-box/LRR-repeat protein 17	FXL17_MOUSE	5.40548	1.14039	5.32421
Rundc3a	RUN domain-containing protein 3A;Isoform 2 of RUN domain-containing protein 3A;Isoform 3 of RUN domain-containing protein 3A;Isoform 4 of RUN domain-containing protein 3A	RUN3A_MOUSE	5.6444	3.60987	5.3177
Chchd3	MICOS complex subunit Mic19	MIC19_MOUSE	7.28703	4.84037	5.30685
Pmm1	Phosphomannomutase 1	PMM1_MOUSE	0.977675	0	5.30424
Cops7a	COP9 signalosome complex subunit 7a;Isoform 2 of COP9 signalosome complex subunit 7a	CSN7A_MOUSE	4.30908	3.53618	5.30121
Ap3s1	AP-3 complex subunit sigma-1	AP3S1_MOUSE	2.83582	0	5.29245
Bag4	BAG family molecular chaperone regulator 4	BAG4_MOUSE	3.68119	3.49123	5.29021
Dazap1	DAZ-associated protein 1;Isoform 2 of DAZ-associated protein 1	DAZP1_MOUSE	6.43821	3.37892	5.28906
Ranbp9	Ran-binding protein 9	RANB9_MOUSE	4.00851	1.13722	5.27748
Ipo5	Importin-5	IPO5_MOUSE	5.07815	3.94894	5.26884
Ubp1;Ubp1;Tfcp2;Tfcp2;Tfcp2	Upstream-binding protein 1;Isoform 2 of Upstream-binding protein 1;Alpha-globin transcription factor CP2;Isoform 2 of Alpha-globin transcription factor CP2;Isoform 3 of Alpha-globin transcription factor CP2	UBIP1_MOUSE;UBIP1_MOUSE;TFCP2_MOUSE;TFCP2_MOUSE;TFCP2_MOUSE	4.61879	0	5.26732
Fry	Protein furry homolog;Isoform 2 of Protein furry homolog	FRY_MOUSE	6.0354	4.36072	5.2615
Sdc2	Syndecan-2	SDC2_MOUSE	2.06834	3.08732	5.26124
Mpv17l	Mpv17-like protein;Isoform 2 of Mpv17-like protein;Isoform 3 of Mpv17-like protein	MP17L_MOUSE	0	1.06689	5.26063
Tmx1	Thioredoxin-related transmembrane protein 1	TMX1_MOUSE	6.10555	3.61553	5.25849
Stk32c	Serine/threonine-protein kinase 32C	ST32C_MOUSE	3.70356	2.97348	5.25157
Dvl1	Segment polarity protein dishevelled homolog DVL-1	DVL1_MOUSE	4.96907	3.99293	5.24487
Cadm1	Cell adhesion molecule 1;Isoform 2 of Cell adhesion molecule 1;Isoform 3 of Cell adhesion molecule 1;Isoform 4 of Cell adhesion molecule 1;Isoform 6 of Cell adhesion molecule 1;Isoform 7 of Cell adhesion molecule 1	CADM1_MOUSE	6.00832	3.68932	5.23075
Iars2	Isoleucine--tRNA ligase, mitochondrial	SYIM_MOUSE	5.09804	3.21921	5.22921
Vbp1	Prefoldin subunit 3	PFD3_MOUSE	4.80578	4.01684	5.22768
Bola1	BolA-like protein 1	BOLA1_MOUSE	0	0	5.22698
Psmd6	26S proteasome non-ATPase regulatory subunit 6	PSMD6_MOUSE	4.68843	3.93411	5.2253
Trio	Triple functional domain protein;Isoform 3 of Triple functional domain protein;Isoform 4 of Triple functional domain protein	TRIO_MOUSE	4.25129	3.758	5.22516
Ccdc177	Coiled-coil domain-containing protein 177	CC177_MOUSE	3.79895	2.78863	5.2158
Zfyve1	Zinc finger FYVE domain-containing protein 1	ZFYV1_MOUSE	0	0.679534	5.20648
Plppr4	Phospholipid phosphatase-related protein type 4	PLPR4_MOUSE	4.43837	0.850035	5.20494
Tab1	TGF-beta-activated kinase 1 and MAP3K7-binding protein 1	TAB1_MOUSE	1.5243	0	5.20462
Dnpep	Aspartyl aminopeptidase	DNPEP_MOUSE	4.6053	1.24417	5.20252
Dnajb2	DnaJ homolog subfamily B member 2;Isoform 2 of DnaJ homolog subfamily B member 2	DNJB2_MOUSE	3.91307	0	5.20247
Nt5c2	Cytosolic purine 5'-nucleotidase	5NTC_MOUSE	5.33103	4.09322	5.20206
Ubap2l	Ubiquitin-associated protein 2-like;Isoform 2 of Ubiquitin-associated protein 2-like;Isoform 3 of Ubiquitin-associated protein 2-like;Isoform 4 of Ubiquitin-associated protein 2-like;Isoform 5 of Ubiquitin-associated protein 2-like	UBP2L_MOUSE	7.297	4.93167	5.19631
Lsm1	U6 snRNA-associated Sm-like protein LSm1	LSM1_MOUSE	0	0	5.19225
Gfod1	Glucose-fructose oxidoreductase domain-containing protein 1	GFOD1_MOUSE	6.25835	2.97088	5.18144
Tmed8	Protein TMED8	TMED8_MOUSE	4.60176	2.52642	5.1809
Garem1	GRB2-associated and regulator of MAPK protein	GARE1_MOUSE	4.5841	2.29408	5.17369
Kiaa1107	AP2-interacting clathrin-endocytosis protein	K1107_MOUSE	4.32509	4.41128	5.16578
Stub1	STIP1 homology and U box-containing protein 1	CHIP_MOUSE	5.61016	3.07831	5.16457
Lrrc47	Leucine-rich repeat-containing protein 47	LRC47_MOUSE	3.34565	2.1014	5.1643
Kcnq2	Potassium voltage-gated channel subfamily KQT member 2;Isoform 13 of Potassium voltage-gated channel subfamily KQT member 2;Isoform 2 of Potassium voltage-gated channel subfamily KQT member 2;Isoform 4 of Potassium voltage-gated channel subfamily KQT member 2	KCNQ2_MOUSE	4.0813	4.40957	5.16397
Osbpl8	Oxysterol-binding protein-related protein 8	OSBL8_MOUSE	6.32887	4.32934	5.14859
Agk	Acylglycerol kinase, mitochondrial	AGK_MOUSE	5.80587	3.23957	5.1395
Hdac6	Histone deacetylase 6	HDAC6_MOUSE	4.29577	2.48183	5.13463
Arf2	ADP-ribosylation factor 2	ARF2_MOUSE	5.04661	2.97934	5.12781
Spata2	Spermatogenesis-associated protein 2	SPAT2_MOUSE	1.67534	1.23565	5.12605
Pfdn6	Prefoldin subunit 6	PFD6_MOUSE	5.68586	4.97722	5.11669
Dock3	Dedicator of cytokinesis protein 3	DOCK3_MOUSE	5.18082	4.88749	5.11097
Pten	Phosphatidylinositol 3,4,5-trisphosphate 3-phosphatase and dual-specificity protein phosphatase PTEN	PTEN_MOUSE	4.96218	3.78883	5.10587
Wdr54	WD repeat-containing protein 54	WDR54_MOUSE	1.94457	0.926099	5.10566
Ptpru	Receptor-type tyrosine-protein phosphatase U;Isoform 2 of Receptor-type tyrosine-protein phosphatase U	PTPRU_MOUSE	0	0.558809	5.10469
Vps37a	Vacuolar protein sorting-associated protein 37A;Isoform 3 of Vacuolar protein sorting-associated protein 37A	VP37A_MOUSE	5.0984	1.14129	5.10231
Nectin3	Nectin-3	NECT3_MOUSE	4.70028	0.809806	5.09628
Pcdha4;Pcdha9;Pcdha7;Pcdha10	Protocadherin alpha-4;Protocadherin alpha-9;Protocadherin alpha-7;Protocadherin alpha-10	PCDA4_MOUSE;PCDA9_MOUSE;PCDA7_MOUSE;PCDAA_MOUSE	0	0	5.08837
Glmn	Glomulin	GLMN_MOUSE	4.50227	1.65991	5.07858
Map2k6	Dual specificity mitogen-activated protein kinase kinase 6	MP2K6_MOUSE	0.429827	0	5.07209
Mtmr9	Myotubularin-related protein 9	MTMR9_MOUSE	4.54993	1.85176	5.07094
Ndufb10	NADH dehydrogenase [ubiquinone] 1 beta subcomplex subunit 10	NDUBA_MOUSE	7.52267	4.54806	5.06496
Reep1	Receptor expression-enhancing protein 1	REEP1_MOUSE	5.48935	3.25527	5.06102
Ccdc92	Coiled-coil domain-containing protein 92	CCD92_MOUSE	5.36706	2.52588	5.05559
Arhgef12	Rho guanine nucleotide exchange factor 12	ARHGC_MOUSE	4.37836	3.67665	5.05068
Osbpl9	Oxysterol-binding protein-related protein 9;Isoform 2 of Oxysterol-binding protein-related protein 9	OSBL9_MOUSE	3.44753	0	5.03796
Tbc1d5	TBC1 domain family member 5	TBCD5_MOUSE	4.00748	2.39763	5.03749
Ndufa12	NADH dehydrogenase [ubiquinone] 1 alpha subcomplex subunit 12	NDUAC_MOUSE	0	0	5.03471
Plppr3	Phospholipid phosphatase-related protein type 3	PLPR3_MOUSE	4.74052	3.1209	5.02992
Wwp1;Itch	NEDD4-like E3 ubiquitin-protein ligase WWP1;E3 ubiquitin-protein ligase Itchy	WWP1_MOUSE;ITCH_MOUSE	2.17722	2.03128	5.02543
Wdr11	WD repeat-containing protein 11	WDR11_MOUSE	1.03553	0	5.02143
Sms	Spermine synthase	SPSY_MOUSE	3.90984	3.73538	5.01488
Trim32	E3 ubiquitin-protein ligase TRIM32	TRI32_MOUSE	4.81539	1.58481	5.00471
Slc9a7	Sodium/hydrogen exchanger 7;Isoform 2 of Sodium/hydrogen exchanger 7	SL9A7_MOUSE	5.33107	3.19097	5.00232
Ulk2	Serine/threonine-protein kinase ULK2	ULK2_MOUSE	4.18774	2.59238	5.00059
Mark4	MAP/microtubule affinity-regulating kinase 4;Isoform 2 of MAP/microtubule affinity-regulating kinase 4	MARK4_MOUSE	2.26869	0.944215	5.00051
Atpaf1	ATP synthase mitochondrial F1 complex assembly factor 1	ATPF1_MOUSE	4.66256	3.47971	4.99831
Ppp6r3	Serine/threonine-protein phosphatase 6 regulatory subunit 3;Isoform 2 of Serine/threonine-protein phosphatase 6 regulatory subunit 3;Isoform 3 of Serine/threonine-protein phosphatase 6 regulatory subunit 3;Isoform 4 of Serine/threonine-protein phosphatase 6 regulatory subunit 3	PP6R3_MOUSE	4.08688	1.97088	4.99452
Cyfip1	Cytoplasmic FMR1-interacting protein 1	CYFP1_MOUSE	2.77782	2.84798	4.99184
Cda	Cytidine deaminase	CDD_MOUSE	2.14183	0	4.98416
Gjc3	Gap junction gamma-3 protein	CXG3_MOUSE	2.70296	5.63161	4.98363
Trpc6	Short transient receptor potential channel 6	TRPC6_MOUSE	5.9175	5.11467	4.97194
Frmd4a	FERM domain-containing protein 4A;Isoform 2 of FERM domain-containing protein 4A	FRM4A_MOUSE	2.51922	0.527469	4.9716
Arhgap5	Rho GTPase-activating protein 5	RHG05_MOUSE	4.24079	3.23647	4.96672
Grm1	Metabotropic glutamate receptor 1	GRM1_MOUSE	6.31516	2.87123	4.96662
Scn8a	Sodium channel protein type 8 subunit alpha;Isoform 3 of Sodium channel protein type 8 subunit alpha;Isoform 5 of Sodium channel protein type 8 subunit alpha	SCN8A_MOUSE	1.79822	2.45073	4.94911
Hebp2	Heme-binding protein 2	HEBP2_MOUSE	3.05628	0	4.93483
Yars1	Tyrosine--tRNA ligase, cytoplasmic	SYYC_MOUSE	5.88175	4.31708	4.92044
Cdc26	Anaphase-promoting complex subunit CDC26	CDC26_MOUSE	2.14151	0.765156	4.9175
Abcg2	Broad substrate specificity ATP-binding cassette transporter ABCG2	ABCG2_MOUSE	0.683302	0.779245	4.91448
Ccdc85a	Coiled-coil domain-containing protein 85A;Isoform 2 of Coiled-coil domain-containing protein 85A	CC85A_MOUSE	2.25191	0.68776	4.9135
Dgke	Diacylglycerol kinase epsilon	DGKE_MOUSE	6.46678	2.78373	4.90639
Akap10	A-kinase anchor protein 10, mitochondrial	AKA10_MOUSE	3.42422	0.796196	4.90319
Adrbk2	Beta-adrenergic receptor kinase 2	ARBK2_MOUSE	2.56295	1.52488	4.90282
Fermt2	Fermitin family homolog 2	FERM2_MOUSE	4.56667	2.44354	4.89855
Nav1	Neuron navigator 1;Isoform 2 of Neuron navigator 1	NAV1_MOUSE	4.00178	3.87347	4.89744
Fsd1	Fibronectin type III and SPRY domain-containing protein 1	FSD1_MOUSE	4.59598	3.01587	4.89315
Mboat7	Lysophospholipid acyltransferase 7	MBOA7_MOUSE	5.24577	3.67992	4.88198
Arfgef3	Brefeldin A-inhibited guanine nucleotide-exchange protein 3	BIG3_MOUSE	4.76293	4.9212	4.88172
Wnk3	Serine/threonine-protein kinase WNK3;Isoform 2 of Serine/threonine-protein kinase WNK3	WNK3_MOUSE	2.96744	2.2445	4.88072
Ndufa8	NADH dehydrogenase [ubiquinone] 1 alpha subcomplex subunit 8	NDUA8_MOUSE	6.58845	5.42932	4.87089
Gars1	Glycine--tRNA ligase	GARS_MOUSE	6.88943	5.0381	4.86222
Rida	2-iminobutanoate/2-iminopropanoate deaminase	RIDA_MOUSE	4.71907	4.06027	4.85943
Sypl1	Isoform 2 of Synaptophysin-like protein 1	SYPL1_MOUSE	1.61877	0.834175	4.85655
Clasp1	CLIP-associating protein 1;Isoform 2 of CLIP-associating protein 1	CLAP1_MOUSE	5.99467	4.80911	4.85152
Rab9b	Ras-related protein Rab-9B	RAB9B_MOUSE	5.2855	2.752	4.84941
Habp4	Intracellular hyaluronan-binding protein 4	HABP4_MOUSE	7.1486	4.78616	4.848
Vill	Villin-like protein;Isoform 2 of Villin-like protein	VILL_MOUSE	3.85338	1.76997	4.84767
Dyrk1a;Dyrk1b;Dyrk1b;Dyrk1b	Dual specificity tyrosine-phosphorylation-regulated kinase 1A;Dual specificity tyrosine-phosphorylation-regulated kinase 1B;Isoform 2 of Dual specificity tyrosine-phosphorylation-regulated kinase 1B;Isoform 3 of Dual specificity tyrosine-phosphorylation-regulated kinase 1B	DYR1A_MOUSE;DYR1B_MOUSE;DYR1B_MOUSE;DYR1B_MOUSE	1.01158	0	4.84665
Lpgat1	Acyl-CoA:lysophosphatidylglycerol acyltransferase 1	LGAT1_MOUSE	4.98877	4.55142	4.84384
Maob	Amine oxidase [flavin-containing] B	AOFB_MOUSE	4.14356	2.54252	4.84181
Fam114a2	Isoform 2 of Protein FAM114A2	F1142_MOUSE	1.09701	0.377167	4.83825
Appl1	DCC-interacting protein 13-alpha	DP13A_MOUSE	5.33123	2.17604	4.82846
Tsr2	Pre-rRNA-processing protein TSR2 homolog	TSR2_MOUSE	3.05744	0	4.82403
Cstf2	Cleavage stimulation factor subunit 2;Isoform 2 of Cleavage stimulation factor subunit 2	CSTF2_MOUSE	2.26695	2.69114	4.81913
Tab3	TGF-beta-activated kinase 1 and MAP3K7-binding protein 3	TAB3_MOUSE	0	0	4.80501
Pts	6-pyruvoyl tetrahydrobiopterin synthase	PTPS_MOUSE	2.49148	1.36963	4.80205
Tdrp	Testis development-related protein	TDRP_MOUSE	3.61667	0.84377	4.7964
Cers1	Ceramide synthase 1	CERS1_MOUSE	2.38235	0	4.7942
Slc35f1	Solute carrier family 35 member F1	S35F1_MOUSE	4.78512	0.903713	4.78332
Itga3	Integrin alpha-3;Isoform 2 of Integrin alpha-3;Isoform 3 of Integrin alpha-3	ITA3_MOUSE	6.51029	3.20147	4.77916
Psmd12	26S proteasome non-ATPase regulatory subunit 12	PSD12_MOUSE	3.85324	0	4.77716
Tnpo3	Transportin-3;Isoform 2 of Transportin-3	TNPO3_MOUSE	3.05214	0.862186	4.77664
Slc14a1	Urea transporter 1;Isoform 2 of Urea transporter 1	UT1_MOUSE	0.893191	3.6057	4.77547
Arhgap12	Rho GTPase-activating protein 12	RHG12_MOUSE	4.5645	3.68141	4.76913
Stxbp5l	Syntaxin-binding protein 5-like;Isoform 2 of Syntaxin-binding protein 5-like;Isoform 3 of Syntaxin-binding protein 5-like;Isoform 4 of Syntaxin-binding protein 5-like;Isoform 5 of Syntaxin-binding protein 5-like;Isoform 6 of Syntaxin-binding protein 5-like	STB5L_MOUSE	3.73136	0.820878	4.76551
Gabrb2	Isoform 2 of Gamma-aminobutyric acid receptor subunit beta-2	GBRB2_MOUSE	7.24429	5.19114	4.76107
Nyap1	Neuronal tyrosine-phosphorylated phosphoinositide-3-kinase adapter 1;Isoform 2 of Neuronal tyrosine-phosphorylated phosphoinositide-3-kinase adapter 1	NYAP1_MOUSE	3.52061	1.41016	4.75589
Exoc6b	Exocyst complex component 6B	EXC6B_MOUSE	5.08031	1.11619	4.74739
Gnpda2	Glucosamine-6-phosphate isomerase 2;Isoform 2 of Glucosamine-6-phosphate isomerase 2	GNPI2_MOUSE	0.879151	0	4.74526
Iqcb1	IQ calmodulin-binding motif-containing protein 1;Isoform 2 of IQ calmodulin-binding motif-containing protein 1	IQCB1_MOUSE	2.38757	0.969942	4.72875
Chl1	Neural cell adhesion molecule L1-like protein	NCHL1_MOUSE	4.73271	1.95545	4.7128
Mindy2	Ubiquitin carboxyl-terminal hydrolase MINDY-2	MINY2_MOUSE	4.01521	2.39768	4.70269
Carmil3	Capping protein, Arp2/3 and myosin-I linker protein 3	CARL3_MOUSE	4.02628	1.67381	4.69548
Erbb4	Receptor tyrosine-protein kinase erbB-4;Isoform JM-B CYT-2 of Receptor tyrosine-protein kinase erbB-4;Isoform JM-A CYT-2 of Receptor tyrosine-protein kinase erbB-4	ERBB4_MOUSE	6.77314	3.36247	4.69312
Me3	NADP-dependent malic enzyme, mitochondrial	MAON_MOUSE	2.12437	1.61579	4.69269
Cuedc2	CUE domain-containing protein 2	CUED2_MOUSE	3.3263	1.72403	4.68893
Kcnj6	G protein-activated inward rectifier potassium channel 2;Isoform GIRK2-1 of G protein-activated inward rectifier potassium channel 2	KCNJ6_MOUSE	5.53383	2.59821	4.68738
Psmd3	26S proteasome non-ATPase regulatory subunit 3	PSMD3_MOUSE	5.14846	4.09852	4.68102
Ppp4r4	Serine/threonine-protein phosphatase 4 regulatory subunit 4;Isoform 2 of Serine/threonine-protein phosphatase 4 regulatory subunit 4;Isoform 3 of Serine/threonine-protein phosphatase 4 regulatory subunit 4	PP4R4_MOUSE	3.31961	1.04082	4.66686
Plxna1	Plexin-A1	PLXA1_MOUSE	3.18696	0.870303	4.65778
Acsbg1	Long-chain-fatty-acid--CoA ligase ACSBG1	ACBG1_MOUSE	4.72736	4.23785	4.65703
Uqcr11	Cytochrome b-c1 complex subunit 10	QCR10_MOUSE	0.911848	4.28396	4.65296
Anks1a	Ankyrin repeat and SAM domain-containing protein 1A;Isoform 2 of Ankyrin repeat and SAM domain-containing protein 1A	ANS1A_MOUSE	0.773716	0.932159	4.63994
Vps13c	Vacuolar protein sorting-associated protein 13C;Isoform 2 of Vacuolar protein sorting-associated protein 13C;Isoform 3 of Vacuolar protein sorting-associated protein 13C	VP13C_MOUSE	2.87493	1.65151	4.6322
Slc27a4	Long-chain fatty acid transport protein 4	S27A4_MOUSE	4.92088	2.97471	4.62763
Ttc9	Tetratricopeptide repeat protein 9A	TTC9A_MOUSE	0.724957	0	4.62225
Ndufb9	NADH dehydrogenase [ubiquinone] 1 beta subcomplex subunit 9	NDUB9_MOUSE	0	2.19906	4.61262
Dst	Dystonin;Isoform 1 of Dystonin;Isoform 4 of Dystonin	DYST_MOUSE	4.45051	4.47497	4.60961
Stk26;Stk24;Stk25	Serine/threonine-protein kinase 26;Serine/threonine-protein kinase 24;Serine/threonine-protein kinase 25	STK26_MOUSE;STK24_MOUSE;STK25_MOUSE	4.67448	2.56005	4.59497
Tceal5	Transcription elongation factor A protein-like 5	TCAL5_MOUSE	5.81045	3.8524	4.59398
Amer2	APC membrane recruitment protein 2	AMER2_MOUSE	5.80956	3.91687	4.5905
Pigt	GPI transamidase component PIG-T	PIGT_MOUSE	1.20659	0	4.57942
Nans	Sialic acid synthase	SIAS_MOUSE	3.0808	2.52731	4.56952
Tnpo2	Transportin-2	TNPO2_MOUSE	4.53629	2.44283	4.56913
Cacnb2	Voltage-dependent L-type calcium channel subunit beta-2;Isoform 2 of Voltage-dependent L-type calcium channel subunit beta-2;Isoform 3 of Voltage-dependent L-type calcium channel subunit beta-2;Isoform 4 of Voltage-dependent L-type calcium channel subunit beta-2	CACB2_MOUSE	4.43452	0.728618	4.56686
Gid8	Glucose-induced degradation protein 8 homolog	GID8_MOUSE	3.44268	0	4.55911
Snx5	Sorting nexin-5	SNX5_MOUSE	4.40752	0.877918	4.5548
Gpaa1	Glycosylphosphatidylinositol anchor attachment 1 protein	GPAA1_MOUSE	8.95921	1.11666	4.55403
Ubxn6	UBX domain-containing protein 6;Isoform 2 of UBX domain-containing protein 6	UBXN6_MOUSE	2.62591	4.17218	4.54909
Hecw2	E3 ubiquitin-protein ligase HECW2	HECW2_MOUSE	4.60543	3.19647	4.54636
Adam23	Disintegrin and metalloproteinase domain-containing protein 23;Isoform Beta of Disintegrin and metalloproteinase domain-containing protein 23;Isoform Gamma of Disintegrin and metalloproteinase domain-containing protein 23;Isoform Delta of Disintegrin and metalloproteinase domain-containing protein 23	ADA23_MOUSE	5.76497	4.5632	4.54461
Rab11fip5	Rab11 family-interacting protein 5	RFIP5_MOUSE	7.00486	4.15497	4.5252
Slc1a1	Excitatory amino acid transporter 3	EAA3_MOUSE	4.29535	1.24586	4.5231
Lmbrd2	G-protein coupled receptor-associated protein LMBRD2;Isoform 2 of G-protein coupled receptor-associated protein LMBRD2;Isoform 3 of G-protein coupled receptor-associated protein LMBRD2	LMBD2_MOUSE	0.94601	0.900423	4.52277
Lsm12	Protein LSM12 homolog	LSM12_MOUSE	4.43361	0.834519	4.51651
Elfn1	Protein ELFN1	ELFN1_MOUSE	6.45304	3.13204	4.49307
Sema4d	Semaphorin-4D	SEM4D_MOUSE	0	0	4.49139
Rp2	Protein XRP2;Isoform 2 of Protein XRP2;Isoform 3 of Protein XRP2;Isoform 4 of Protein XRP2	XRP2_MOUSE	2.72292	0.455515	4.49043
Gpr26	G-protein coupled receptor 26	GPR26_MOUSE	0	0	4.48201
Zyx	Zyxin	ZYX_MOUSE	3.52167	3.85684	4.48087
Psen1;Psen2;Psen2	Presenilin-1;Presenilin-2;Isoform 2 of Presenilin-2	PSN1_MOUSE;PSN2_MOUSE;PSN2_MOUSE	0	0	4.46988
Irgm1	Immunity-related GTPase family M protein 1;Isoform 2 of Immunity-related GTPase family M protein 1	IRGM1_MOUSE	2.88273	0	4.46545
Rgs3	Regulator of G-protein signaling 3;Isoform 5 of Regulator of G-protein signaling 3;Isoform 2 of Regulator of G-protein signaling 3	RGS3_MOUSE	2.53598	1.3201	4.45919
Marchf5	E3 ubiquitin-protein ligase MARCHF5	MARH5_MOUSE	4.74812	1.5064	4.45679
Nck1	Cytoplasmic protein NCK1	NCK1_MOUSE	2.82956	2.29976	4.45649
Irf3	Interferon regulatory factor 3	IRF3_MOUSE	1.6674	0.590782	4.45438
Rps6ka1;Rps6ka3;Rps6ka2	Ribosomal protein S6 kinase alpha-1;Ribosomal protein S6 kinase alpha-3;Ribosomal protein S6 kinase alpha-2	KS6A1_MOUSE;KS6A3_MOUSE;KS6A2_MOUSE	0	0	4.45189
Mtx1	Metaxin-1	MTX1_MOUSE	4.94324	0.883631	4.45079
Pym1	Partner of Y14 and mago;Isoform 2 of Partner of Y14 and mago	PYM1_MOUSE	5.84433	4.41124	4.44476
Zer1	Protein zer-1 homolog;Isoform 2 of Protein zer-1 homolog	ZER1_MOUSE	4.30109	1.75003	4.44206
Zmpste24	CAAX prenyl protease 1 homolog	FACE1_MOUSE	3.3146	3.1562	4.42219
Arih2	E3 ubiquitin-protein ligase ARIH2	ARI2_MOUSE	2.41472	0.538449	4.42155
Agtpbp1	Cytosolic carboxypeptidase 1;Isoform 2 of Cytosolic carboxypeptidase 1;Isoform 3 of Cytosolic carboxypeptidase 1;Isoform 4 of Cytosolic carboxypeptidase 1;Isoform 5 of Cytosolic carboxypeptidase 1	CBPC1_MOUSE	2.80214	0.755452	4.41751
G3bp2	Ras GTPase-activating protein-binding protein 2	G3BP2_MOUSE	8.54317	5.76294	4.41702
Ube2j1	Ubiquitin-conjugating enzyme E2 J1	UB2J1_MOUSE	6.25565	4.57494	4.40466
Mfsd6	Isoform 2 of Major facilitator superfamily domain-containing protein 6	MFSD6_MOUSE	1.41005	0.532879	4.39925
Rars1	Arginine--tRNA ligase, cytoplasmic	SYRC_MOUSE	5.43851	3.91789	4.3795
Mycbp	c-Myc-binding protein	MYCBP_MOUSE	1.70769	1.07052	4.36396
Castor2	Cytosolic arginine sensor for mTORC1 subunit 2	CAST2_MOUSE	1.54588	0	4.35407
Frs3	Fibroblast growth factor receptor substrate 3	FRS3_MOUSE	4.52539	0.665936	4.34994
Rabgap1l	Rab GTPase-activating protein 1-like	RBG1L_MOUSE	6.07492	2.42568	4.34397
Elavl1	ELAV-like protein 1	ELAV1_MOUSE	6.19519	2.36874	4.32845
Trappc5	Trafficking protein particle complex subunit 5	TPPC5_MOUSE	3.21607	0.894552	4.32588
Mtmr7	Myotubularin-related protein 7	MTMR7_MOUSE	4.90857	1.79538	4.32025
Ccdc136	Coiled-coil domain-containing protein 136;Isoform 2 of Coiled-coil domain-containing protein 136	CC136_MOUSE	5.49905	4.15607	4.31779
Inpp5f	Phosphatidylinositide phosphatase SAC2	SAC2_MOUSE	0.522848	0.69459	4.31503
Xpo5	Exportin-5;Isoform 2 of Exportin-5	XPO5_MOUSE	4.83978	1.98164	4.31343
Atg4b	Cysteine protease ATG4B	ATG4B_MOUSE	4.49848	2.33849	4.30521
Hid1	Protein HID1;Isoform 2 of Protein HID1	HID1_MOUSE	3.95183	1.61357	4.29284
Begain	Brain-enriched guanylate kinase-associated protein	BEGIN_MOUSE	6.54913	3.10915	4.28159
S100b	Protein S100-B	S100B_MOUSE	4.38724	4.21653	4.28138
Sphk2	Sphingosine kinase 2	SPHK2_MOUSE	5.09489	2.12105	4.26474
Dtx3	Probable E3 ubiquitin-protein ligase DTX3	DTX3_MOUSE	3.15886	1.97959	4.25444
Mpp2	MAGUK p55 subfamily member 2;Isoform 2 of MAGUK p55 subfamily member 2	MPP2_MOUSE	7.58615	3.79806	4.24641
Eif4ebp2	Eukaryotic translation initiation factor 4E-binding protein 2	4EBP2_MOUSE	1.51927	0.770316	4.24403
Kpna4	Importin subunit alpha-3	IMA3_MOUSE	4.06555	0.761071	4.2401
Abhd10	Mycophenolic acid acyl-glucuronide esterase, mitochondrial;Isoform 2 of Mycophenolic acid acyl-glucuronide esterase, mitochondrial	ABHDA_MOUSE	3.84421	3.31744	4.22483
Wdr48	WD repeat-containing protein 48;Isoform 2 of WD repeat-containing protein 48	WDR48_MOUSE	3.05583	0.96207	4.2117
Ddx5	Probable ATP-dependent RNA helicase DDX5	DDX5_MOUSE	6.31731	4.66886	4.20825
Cetn2	Centrin-2	CETN2_MOUSE	1.72427	1.95083	4.20188
Cdh11	Cadherin-11	CAD11_MOUSE	3.25099	1.21536	4.20133
Mms19	MMS19 nucleotide excision repair protein homolog;Isoform 3 of MMS19 nucleotide excision repair protein homolog	MMS19_MOUSE	4.28407	0.85616	4.19749
Abcb1b;Abcb1a	ATP-dependent translocase ABCB1	MDR1B_MOUSE;MDR1A_MOUSE	0	0.635793	4.19658
Ythdf1	YTH domain-containing family protein 1	YTHD1_MOUSE	5.41249	2.73032	4.17548
C2cd5	C2 domain-containing protein 5;Isoform 2 of C2 domain-containing protein 5;Isoform 3 of C2 domain-containing protein 5	C2CD5_MOUSE	3.15202	0.805233	4.17319
Lmcd1	LIM and cysteine-rich domains protein 1	LMCD1_MOUSE	0.460065	0	4.17275
Katnb1	Katanin p80 WD40 repeat-containing subunit B1	KTNB1_MOUSE	2.91632	1.51906	4.17047
Dtna	Dystrobrevin alpha;Isoform 2 of Dystrobrevin alpha;Isoform 3 of Dystrobrevin alpha;Isoform 4 of Dystrobrevin alpha;Isoform 7 of Dystrobrevin alpha	DTNA_MOUSE	4.66427	0.695746	4.16507
Azi2	5-azacytidine-induced protein 2	AZI2_MOUSE	1.33944	0.547194	4.1584
Skt	Sickle tail protein;Isoform 2 of Sickle tail protein;Isoform 3 of Sickle tail protein;Isoform 4 of Sickle tail protein;Isoform 5 of Sickle tail protein;Isoform 6 of Sickle tail protein;Isoform 8 of Sickle tail protein;Isoform 9 of Sickle tail protein	SKT_MOUSE	2.43635	0	4.15216
Stat3	Signal transducer and activator of transcription 3;Isoform Stat3B of Signal transducer and activator of transcription 3;Isoform Del-701 of Signal transducer and activator of transcription 3	STAT3_MOUSE	3.53312	1.48616	4.15094
Usp11	Ubiquitin carboxyl-terminal hydrolase 11	UBP11_MOUSE	6.14081	3.13658	4.13329
Nrbp2	Nuclear receptor-binding protein 2	NRBP2_MOUSE	3.24539	0.56656	4.13179
Camsap2	Calmodulin-regulated spectrin-associated protein 2;Isoform 2 of Calmodulin-regulated spectrin-associated protein 2	CAMP2_MOUSE	4.83888	2.51684	4.11777
Letmd1	LETM1 domain-containing protein 1	LTMD1_MOUSE	0.807949	2.25477	4.11477
Znrd2	Protein ZNRD2	ZNRD2_MOUSE	1.61432	0	4.11121
Mfsd4a	Major facilitator superfamily domain-containing protein 4A	MFD4A_MOUSE	0	0	4.1102
Fam219a	Protein FAM219A	F219A_MOUSE	2.79865	0	4.10011
Dhrs7	Dehydrogenase/reductase SDR family member 7	DHRS7_MOUSE	1.83159	0	4.09926
Limd2	LIM domain-containing protein 2	LIMD2_MOUSE	0	0	4.09601
Gucy2c	Heat-stable enterotoxin receptor;Isoform 2 of Heat-stable enterotoxin receptor	GUC2C_MOUSE	1.58513	0	4.08854
Grcc10	Protein C10	C10_MOUSE	1.09071	1.91294	4.08026
Denr	Density-regulated protein	DENR_MOUSE	0.986415	0	4.07587
Srsf1	Serine/arginine-rich splicing factor 1;Isoform 2 of Serine/arginine-rich splicing factor 1;Isoform 3 of Serine/arginine-rich splicing factor 1	SRSF1_MOUSE	5.99373	5.92738	4.07385
Lyst	Lysosomal-trafficking regulator;Isoform 2 of Lysosomal-trafficking regulator	LYST_MOUSE	0.644111	0.499065	4.06441
Ewsr1	RNA-binding protein EWS	EWS_MOUSE	7.46091	5.38183	4.04983
Gucy1b1	Guanylate cyclase soluble subunit beta-1	GCYB1_MOUSE	6.17779	2.05356	4.00528
Stim1	Stromal interaction molecule 1	STIM1_MOUSE	4.17429	0.975288	3.97137
Wdr41	WD repeat-containing protein 41	WDR41_MOUSE	0	0	3.94353
Ethe1	Persulfide dioxygenase ETHE1, mitochondrial	ETHE1_MOUSE	1.09631	2.17355	3.94064
Elp3	Elongator complex protein 3;Isoform 2 of Elongator complex protein 3	ELP3_MOUSE	5.89859	2.21157	3.93674
Chrm4	Muscarinic acetylcholine receptor M4	ACM4_MOUSE	0	0	3.93221
Mlc1	Membrane protein MLC1	MLC1_MOUSE	2.85297	1.82295	3.9309
Cyria	CYFIP-related Rac1 interactor A	CYRIA_MOUSE	1.2406	0	3.93065
Wdr6	WD repeat-containing protein 6	WDR6_MOUSE	6.01486	4.5078	3.9047
Pcyox1l	Prenylcysteine oxidase-like	PCYXL_MOUSE	2.77821	2.4348	3.90321
Bcap31	B-cell receptor-associated protein 31	BAP31_MOUSE	3.52774	3.63962	3.89693
Inpp5k	Inositol polyphosphate 5-phosphatase K	INP5K_MOUSE	5.03932	1.12908	3.87522
Gjb6	Gap junction beta-6 protein	CXB6_MOUSE	0.720024	0.664135	3.81987
Tmem255a	Transmembrane protein 255A;Isoform 3 of Transmembrane protein 255A	T255A_MOUSE	0	0	3.81534
Atxn2	Ataxin-2;Isoform 2 of Ataxin-2;Isoform 3 of Ataxin-2	ATX2_MOUSE	4.69797	2.17222	3.80651
Kiaa1671	Uncharacterized protein KIAA1671	K1671_MOUSE	0	0	3.78034
Gdpd5	Glycerophosphodiester phosphodiesterase domain-containing protein 5	GDPD5_MOUSE	0	0	3.77456
Phactr1;Phactr1;Phactr1;Phactr1;Phactr4;Phactr4;Phactr4	Phosphatase and actin regulator 1;Isoform 2 of Phosphatase and actin regulator 1;Isoform 3 of Phosphatase and actin regulator 1;Isoform 4 of Phosphatase and actin regulator 1;Phosphatase and actin regulator 4;Isoform 2 of Phosphatase and actin regulator 4;Isoform 3 of Phosphatase and actin regulator 4	PHAR1_MOUSE;PHAR1_MOUSE;PHAR1_MOUSE;PHAR1_MOUSE;PHAR4_MOUSE;PHAR4_MOUSE;PHAR4_MOUSE	3.59148	0.939028	3.77274
Timm50	Mitochondrial import inner membrane translocase subunit TIM50	TIM50_MOUSE	5.31148	1.02208	3.75848
Usp47	Ubiquitin carboxyl-terminal hydrolase 47;Isoform 2 of Ubiquitin carboxyl-terminal hydrolase 47	UBP47_MOUSE	5.36668	2.01787	3.75424
Mboat2	Lysophospholipid acyltransferase 2;Isoform 2 of Lysophospholipid acyltransferase 2	MBOA2_MOUSE	0.910056	0.820129	3.75038
Dock7	Dedicator of cytokinesis protein 7;Isoform 2 of Dedicator of cytokinesis protein 7	DOCK7_MOUSE	0.813086	0	3.7479
Elp1	Elongator complex protein 1	ELP1_MOUSE	5.69244	3.05626	3.72198
Arl6	ADP-ribosylation factor-like protein 6;Isoform 2 of ADP-ribosylation factor-like protein 6	ARL6_MOUSE	0.792644	0.738269	3.70954
Tbc1d15	TBC1 domain family member 15	TBC15_MOUSE	2.71401	0	3.70705
Apool	MICOS complex subunit Mic27	MIC27_MOUSE	2.61778	0	3.70651
Dnajc27	DnaJ homolog subfamily C member 27	DJC27_MOUSE	0.709758	0	3.70235
Traf3	TNF receptor-associated factor 3	TRAF3_MOUSE	6.54938	2.34825	3.70094
Dnajb14	DnaJ homolog subfamily B member 14	DJB14_MOUSE	5.16803	3.76568	3.69397
Spred3	Sprouty-related, EVH1 domain-containing protein 3	SPRE3_MOUSE	3.63005	0	3.64993
Ptges2	Prostaglandin E synthase 2	PGES2_MOUSE	5.24276	2.88712	3.63589
Yipf5	Protein YIPF5	YIPF5_MOUSE	2.50717	0.613023	3.62551
Ppp1r12c	Protein phosphatase 1 regulatory subunit 12C	PP12C_MOUSE	2.17891	0	3.61948
Crppa	D-ribitol-5-phosphate cytidylyltransferase	ISPD_MOUSE	1.41118	0	3.60211
Acot9	Acyl-coenzyme A thioesterase 9, mitochondrial	ACOT9_MOUSE	0.742887	0.872493	3.59922
Chmp1a	Charged multivesicular body protein 1a	CHM1A_MOUSE	0.754752	0.63348	3.59518
Rgs7bp	Regulator of G-protein signaling 7-binding protein	R7BP_MOUSE	3.37168	0	3.59448
Ddx6	Probable ATP-dependent RNA helicase DDX6	DDX6_MOUSE	6.34575	3.2747	3.56036
Atp8a2	Phospholipid-transporting ATPase IB	AT8A2_MOUSE	4.78462	2.00051	3.54168
Ctu2	Cytoplasmic tRNA 2-thiolation protein 2	CTU2_MOUSE	0.783226	0.646109	3.53763
Rtn2	Reticulon-2;Isoform 2 of Reticulon-2	RTN2_MOUSE	0	0	3.5245
Sptb	Spectrin beta chain, erythrocytic	SPTB1_MOUSE	2.91088	0.819697	3.51936
Slc43a2	Large neutral amino acids transporter small subunit 4	LAT4_MOUSE	0	0	3.50586
Usp19	Ubiquitin carboxyl-terminal hydrolase 19;Isoform 2 of Ubiquitin carboxyl-terminal hydrolase 19	UBP19_MOUSE	3.18956	0.850211	3.50437
Bsdc1	BSD domain-containing protein 1	BSDC1_MOUSE	0.638471	0	3.49081
Bmerb1	bMERB domain-containing protein 1	MERB1_MOUSE	0	0.00644673	3.47217
Nrip3	Nuclear receptor-interacting protein 3	NRIP3_MOUSE	5.91647	4.83927	3.46776
Mycbp2	E3 ubiquitin-protein ligase MYCBP2;Isoform 2 of E3 ubiquitin-protein ligase MYCBP2	MYCB2_MOUSE	1.33109	0	3.41677
Mobp	Myelin-associated oligodendrocyte basic protein	MOBP_MOUSE	4.1362	3.95557	3.4132
Cntnap2	Contactin-associated protein-like 2	CNTP2_MOUSE	5.68079	2.95934	3.39569
Fmn2	Formin-2	FMN2_MOUSE	0.549552	0.874719	3.36846
Mpdz	Multiple PDZ domain protein;Isoform 2 of Multiple PDZ domain protein;Isoform 4 of Multiple PDZ domain protein	MPDZ_MOUSE	1.75191	0.786897	3.36419
Homer2	Homer protein homolog 2;Isoform 2 of Homer protein homolog 2	HOME2_MOUSE	5.88373	3.01158	3.34252
Vps41	Vacuolar protein sorting-associated protein 41 homolog	VPS41_MOUSE	4.67333	1.76868	3.33773
Strn4	Striatin-4;Isoform 2 of Striatin-4	STRN4_MOUSE	2.24706	0.766818	3.32001
Tacr1	Substance-P receptor	NK1R_MOUSE	0	0	3.31486
Slc25a51	Solute carrier family 25 member 51	S2551_MOUSE	0	0.624824	3.30954
Znf330	Zinc finger protein 330;Isoform 2 of Zinc finger protein 330	ZN330_MOUSE	0.481663	0.683032	3.29698
Naa30	N-alpha-acetyltransferase 30	NAA30_MOUSE	0.558924	0	3.25449
Gopc	Golgi-associated PDZ and coiled-coil motif-containing protein;Isoform 2 of Golgi-associated PDZ and coiled-coil motif-containing protein	GOPC_MOUSE	3.00351	0.646588	3.23264
Fchsd1	F-BAR and double SH3 domains protein 1	FCSD1_MOUSE	0	0	3.21303
Selenow	Selenoprotein W	SELW_MOUSE	0	0	3.19643
Dhrs1	Dehydrogenase/reductase SDR family member 1	DHRS1_MOUSE	4.28024	1.64588	3.19548
Fuom	Fucose mutarotase;Isoform 2 of Fucose mutarotase;Isoform 4 of Fucose mutarotase;Isoform 5 of Fucose mutarotase	FUCM_MOUSE	0	0	3.1927
Lmtk3	Serine/threonine-protein kinase LMTK3	LMTK3_MOUSE	6.24329	2.26019	3.17905
Dbt	Lipoamide acyltransferase component of branched-chain alpha-keto acid dehydrogenase complex, mitochondrial	ODB2_MOUSE	1.29811	1.81651	3.1712
Znf428	Zinc finger protein 428	ZN428_MOUSE	4.73456	0.822458	3.17071
Stat2	Signal transducer and activator of transcription 2	STAT2_MOUSE	0.608813	0	3.15901
Nrbp1	Nuclear receptor-binding protein	NRBP_MOUSE	2.3449	0.587195	3.10048
Ppp1r13b	Apoptosis-stimulating of p53 protein 1	ASPP1_MOUSE	1.40352	0.463351	3.01256
Osbpl2	Oxysterol-binding protein-related protein 2	OSBL2_MOUSE	0	0	2.99127
Gng12	Guanine nucleotide-binding protein G(I)/G(S)/G(O) subunit gamma-12	GBG12_MOUSE	0.755818	1.3536	2.97554
Ndufa7	NADH dehydrogenase [ubiquinone] 1 alpha subcomplex subunit 7	NDUA7_MOUSE	1.57651	1.53791	2.94706
Tmcc2	Transmembrane and coiled-coil domains protein 2	TMCC2_MOUSE	3.36072	1.50021	2.93026
Psd2	PH and SEC7 domain-containing protein 2;Isoform 2 of PH and SEC7 domain-containing protein 2;Isoform 3 of PH and SEC7 domain-containing protein 2	PSD2_MOUSE	5.44708	0.964662	2.88682
Hook3	Protein Hook homolog 3	HOOK3_MOUSE	4.96622	1.64755	2.88106
Get4	Golgi to ER traffic protein 4 homolog;Isoform 2 of Golgi to ER traffic protein 4 homolog	GET4_MOUSE	5.29425	1.88292	2.85677
FAM120A	Constitutive coactivator of PPAR-gamma-like protein 1	F120A_MOUSE	5.03223	1.82711	2.84817
Camk2n1	Calcium/calmodulin-dependent protein kinase II inhibitor 1	CK2N1_MOUSE	5.60491	1.84739	2.84336
Dvl2	Segment polarity protein dishevelled homolog DVL-2	DVL2_MOUSE	0.661163	0.831357	2.81607
Ptgds	Prostaglandin-H2 D-isomerase;Isoform 2 of Prostaglandin-H2 D-isomerase	PTGDS_MOUSE	4.13974	3.93306	2.80471
Clptm1l	Cleft lip and palate transmembrane protein 1-like protein	CLP1L_MOUSE	1.98658	0.661128	2.77495
Hectd1	E3 ubiquitin-protein ligase HECTD1	HECD1_MOUSE	1.50874	0.73837	2.74893
Nlgn1	Neuroligin-1	NLGN1_MOUSE	4.79522	1.60671	2.74015
Pptc7	Protein phosphatase PTC7 homolog;Isoform 2 of Protein phosphatase PTC7 homolog	PPTC7_MOUSE	1.54948	0	2.65073
Pag1	Phosphoprotein associated with glycosphingolipid-enriched microdomains 1	PHAG1_MOUSE	0.666576	2.25367	2.61618
Znf207	BUB3-interacting and GLEBS motif-containing protein ZNF207;Isoform 2 of BUB3-interacting and GLEBS motif-containing protein ZNF207;Isoform 3 of BUB3-interacting and GLEBS motif-containing protein ZNF207;Isoform 4 of BUB3-interacting and GLEBS motif-containing protein ZNF207	ZN207_MOUSE	4.69862	2.03593	2.59053
Diaph1	Protein diaphanous homolog 1	DIAP1_MOUSE	0	0	2.56652
Epb41l2	Band 4.1-like protein 2	E41L2_MOUSE	2.46111	1.27265	2.56078
Slc24a3	Sodium/potassium/calcium exchanger 3	NCKX3_MOUSE	3.69592	1.46856	2.43983
Ythdf3	YTH domain-containing family protein 3;Isoform 3 of YTH domain-containing family protein 3	YTHD3_MOUSE	4.40119	1.23362	2.31275
Rab2b	Ras-related protein Rab-2B	RAB2B_MOUSE	0.247519	0	2.22122
Ago2;Ago1	Protein argonaute-2;Protein argonaute-1	AGO2_MOUSE;AGO1_MOUSE	0.456806	0	2.14075

## Sheet: Cortex_not_APEX
GN	Accession	Description	Mol_weight_kDa	Expt_1_iBAQ_axon	Expt_2_iBAQ_axon	iBAQ_average
Hist1h4b	P62804	Histone H4	11.367	3420000000	1530000000	2480000000
H2afj	A9UMV8	Histone H2A.J	14.045	2380000000	1350000000	1860000000
Tuba1a	P68370	Tubulin alpha-1A chain	50.135	1300000000	1290000000	1300000000
Hist1h2ba	Q00715	Histone H2B type 1	13.99	1660000000	900000000	1280000000
H3f3b	P84245	Histone H3.3	15.328	1490000000	538000000	1010000000
Tmsb4x	P62329	Thymosin beta-4	5.0526	652000000	818000000	735000000
Calm1	P62161	Calmodulin	16.837	435000000	471000000	453000000
H2afz	P0C0S7	Histone H2A.Z	13.553	544000000	154000000	349000000
Atp6v0c	P63081	V-type proton ATPase 16 kDa proteolipid subunit	15.808	384000000	76900000	231000000
Fabp5	P55053	Fatty acid-binding protein, epidermal	15.059	285000000	159000000	222000000
Atp5b	P10719	ATP synthase subunit beta, mitochondrial	56.353	286000000	99800000	193000000
Gnb1	P54311	Guanine nucleotide-binding protein G(I)/G(S)/G(T) subunit beta-1	37.377	146000000	110000000	128000000
Atp5a1	P15999	ATP synthase subunit alpha, mitochondrial	59.753	162000000	53100000	108000000
Npm1	P13084	Nucleophosmin	32.56	167000000	44100000	105000000
Set	Q63945	Protein SET	33.405	108000000	96800000	102000000
	P02262	Histone H2A type 1	14.077	141000000	58600000	99900000
Rplp1	P19944	60S acidic ribosomal protein P1	11.498	170000000	22100000	96000000
Tpm3	Q63610	Tropomyosin alpha-3 chain	29.006	85800000	60400000	73100000
Stmn1	P13668	Stathmin	17.288	109000000	35900000	72600000
Hspe1	P26772	10 kDa heat shock protein, mitochondrial	10.902	112000000	23700000	68000000
Hnrnpa1	P04256	Heterogeneous nuclear ribonucleoprotein A1	34.212	97500000	28600000	63000000
Mapre1	Q66HR2	Microtubule-associated protein RP/EB family member 1	30.004	80500000	42700000	61600000
Hist1h1e	P15865	Histone H1.4	21.987	97300000	19300000	58300000
Ptn	P63090	Pleiotrophin	18.869	70000000	45200000	57600000
Atp5d	P35434	ATP synthase subunit delta, mitochondrial	17.595	78600000	36600000	57600000
Sod1	P07632	Superoxide dismutase [Cu-Zn]	15.911	80600000	34400000	57500000
Dbi	P11030	Acyl-CoA-binding protein	10.027	58400000	56300000	57400000
Arf1	P84079	ADP-ribosylation factor 1	20.697	3660000	104000000	53700000
Atp5i	P29419	ATP synthase subunit e, mitochondrial	8.2545	83700000	19000000	51300000
Slc25a5	Q09073	ADP/ATP translocase 2	32.901	94200000	6400000	50300000
H2afy	Q02874	Core histone macro-H2A.1	39.503	76800000	20000000	48400000
Nedd8	Q71UE8	NEDD8	8.9723	75000000	20400000	47700000
Ppib	P24368	Peptidyl-prolyl cis-trans isomerase B	23.802	75500000	7590000	41500000
Hmgb1	P63159	High mobility group protein B1	24.893	67000000	15800000	41400000
Rpl22	P47198	60S ribosomal protein L22	14.789	71400000	10600000	41000000
Map1lc3b	Q62625	Microtubule-associated proteins 1A/1B light chain 3B	16.394	71500000	9800000	40700000
Rps7	P62083	40S ribosomal protein S7	22.127	69900000	10800000	40400000
Atp5o	Q06647	ATP synthase subunit O, mitochondrial	23.397	63400000	14600000	39000000
Ap2s1	P62744	AP-2 complex subunit sigma	17.018	54800000	19500000	37100000
Pafah1b2	O35264	Platelet-activating factor acetylhydrolase IB subunit beta	25.581	44000000	29200000	36600000
Hnrnpa2b1	A7VJC2	Heterogeneous nuclear ribonucleoproteins A2/B1	37.477	53400000	19400000	36400000
Mtpn	P62775	Myotrophin	12.861	40200000	31900000	36100000
Dstn	Q7M0E3	Destrin	18.533	45800000	25900000	35900000
Rplp2	P02401	60S acidic ribosomal protein P2	11.692	47900000	22700000	35300000
Crym	Q9QYU4	Ketimine reductase mu-crystallin	33.554	31700000	35500000	33600000
Atp5c1	P35435	ATP synthase subunit gamma, mitochondrial	30.19	51500000	15300000	33400000
Rpl10a	P62907	60S ribosomal protein L10a	24.831	57600000	9240000	33400000
Rps15a	P62246	40S ribosomal protein S15a	14.839	53000000	11500000	32200000
Rps8	P62243	40S ribosomal protein S8	24.205	42100000	22000000	32100000
Rab7a	P09527	Ras-related protein Rab-7a	23.504	41000000	21400000	31200000
Rpl18	P12001	60S ribosomal protein L18	21.658	48900000	13400000	31100000
Eef2	P05197	Elongation factor 2	95.283	43100000	18200000	30700000
Cntn1	Q63198	Contactin-1	113.49	33800000	27500000	30700000
Hspa5	P06761	78 kDa glucose-regulated protein	72.346	49600000	10500000	30100000
Rps14	P13471	40S ribosomal protein S14	16.259	40300000	19600000	29900000
Rps25	P62853	40S ribosomal protein S25	13.742	54600000	5170000	29900000
Nono	Q5FVM4	Non-POU domain-containing octamer-binding protein	54.925	49000000	10700000	29800000
Arf3	P61206	ADP-ribosylation factor 3	20.601	56900000	2230000	29500000
Cs	Q8VHF5	Citrate synthase, mitochondrial	51.866	39000000	19200000	29100000
Hnrnph2	Q6AY09	Heterogeneous nuclear ribonucleoprotein H2	49.293	40800000	17000000	28900000
Rps3	P62909	40S ribosomal protein S3	26.674	42800000	14600000	28700000
Rps18	P62271	40S ribosomal protein S18	17.718	42000000	14700000	28400000
Rpl30	P62890	60S ribosomal protein L30	12.784	46300000	9780000	28000000
Rps20	P60868	40S ribosomal protein S20	13.373	46700000	9210000	28000000
Rpl9	P17077	60S ribosomal protein L9	21.893	47300000	8550000	27900000
Rpl38	P63174	60S ribosomal protein L38	8.2178	47300000	8370000	27800000
Rpl35	P17078	60S ribosomal protein L35	14.552	46500000	8130000	27300000
Opcml	P32736	Opioid-binding protein/cell adhesion molecule	38.067	31100000	23500000	27300000
Rpl12	P23358	60S ribosomal protein L12	17.845	42100000	12300000	27200000
Rpl7a	P62425	60S ribosomal protein L7a	29.995	41300000	12300000	26800000
Rpl7	P05426	60S ribosomal protein L7	30.329	38800000	14300000	26500000
Phb	P67779	Prohibitin	29.82	43000000	9370000	26200000
Gnai1	P10824	Guanine nucleotide-binding protein G(i) subunit alpha-1	40.345	31700000	20300000	26000000
Txn	P11232	Thioredoxin	11.673	36900000	13600000	25300000
Gpc2	P51653	Glypican-2	63.354	33700000	16900000	25300000
Dcx	Q9ESI7	Neuronal migration protein doublecortin	40.559	30000000	20300000	25100000
Atp5h	P31399	ATP synthase subunit d, mitochondrial	18.763	33600000	16600000	25100000
Phb2	Q5XIH7	Prohibitin-2	33.312	40700000	8620000	24700000
Atp5j	P21571	ATP synthase-coupling factor 6, mitochondrial	12.494	33300000	15900000	24600000
Rps24	P62850	40S ribosomal protein S24	15.423	39900000	9250000	24600000
Rpl23a	P62752	60S ribosomal protein L23a	17.695	45200000	3400000	24300000
Rpl21	P20280	60S ribosomal protein L21	18.465	39500000	8980000	24200000
Fabp3	P07483	Fatty acid-binding protein, heart	14.775	34900000	13400000	24200000
Rps12	P63324	40S ribosomal protein S12	14.525	37700000	10200000	24000000
Sept3	Q9WU34	Neuronal-specific septin-3	40.597	36100000	11000000	23600000
Dynlrb1	P62628	Dynein light chain roadblock-type 1	10.99	35500000	11000000	23300000
Acat1	P17764	Acetyl-CoA acetyltransferase, mitochondrial	44.695	31100000	15300000	23200000
Ncl	P13383	Nucleolin	77.146	37000000	9080000	23000000
Myl6	Q64119	Myosin light polypeptide 6	16.975	31500000	14000000	22800000
Hras	P20171	GTPase HRas	21.298	32900000	12400000	22600000
Capza2	Q3T1K5	F-actin-capping protein subunit alpha-2	32.967	28500000	16600000	22600000
Sept7	Q9WVC0	Septin-7	50.507	28800000	16100000	22500000
Ptma	P06302	Prothymosin alpha	12.382	18500000	25900000	22200000
Sept5	Q9JJM9	Septin-5	42.852	32500000	11200000	21900000
Actr3	Q4V7C7	Actin-related protein 3	47.357	26400000	16600000	21500000
Rpsa	P38983	40S ribosomal protein SA	32.824	35000000	7470000	21300000
Sub1	Q63396	Activated RNA polymerase II transcriptional coactivator p15	14.441	40600000	1460000	21000000
Usmg5	Q9JJW3	Up-regulated during skeletal muscle growth protein 5	6.4075	32100000	9780000	20900000
Calr	P18418	Calreticulin	47.995	31400000	10300000	20900000
Atp5j2	D3ZAF6	ATP synthase subunit f, mitochondrial	10.452	28300000	12700000	20500000
Oxct1	B2GV06	Succinyl-CoA:3-ketoacid coenzyme A transferase 1, mitochondrial	56.203	31700000	9170000	20500000
Rps16	P62250	40S ribosomal protein S16	16.445	34800000	6020000	20400000
Thy1	P01830	Thy-1 membrane glycoprotein	18.172	25700000	14800000	20200000
Rps10	P63326	40S ribosomal protein S10	18.916	34700000	5030000	19800000
Rpl14	Q63507	60S ribosomal protein L14	23.339	32700000	6800000	19800000
Rps13	P62278	40S ribosomal protein S13	17.222	33300000	5760000	19500000
Gpc1	P35053	Glypican-1	61.734	27500000	11000000	19200000
Rps6	P62755	40S ribosomal protein S6	28.68	29500000	8410000	19000000
Nefm	P12839	Neurofilament medium polypeptide	95.79	22300000	15600000	18900000
Scamp5	Q9JKE3	Secretory carrier-associated membrane protein 5	26.098	27000000	10800000	18900000
Rab11b	O35509	Ras-related protein Rab-11B	24.488	25600000	11700000	18600000
Sept11	B3GNI6	Septin-11	49.694	23000000	14300000	18600000
Cd200	P04218	OX-2 membrane glycoprotein	31.088	18000000	18700000	18300000
Rpl6	P21533	60S ribosomal protein L6	33.561	28200000	8380000	18300000
Pgls	P85971	6-phosphogluconolactonase	27.234	20200000	16300000	18200000
Hdgfrp3	Q923W4	Hepatoma-derived growth factor-related protein 3	22.446	31800000	4330000	18100000
Ddx39b	Q63413	Spliceosome RNA helicase Ddx39b	49.035	29500000	6230000	17900000
Rps29	P62275	40S ribosomal protein S29	6.6767	32400000	3260000	17800000
Tbca	Q6PEC1	Tubulin-specific chaperone A	12.744	23800000	11600000	17700000
Rps28	P62859	40S ribosomal protein S28	7.8409	29100000	6240000	17700000
Psma7	P48004	Proteasome subunit alpha type-7	28.326	27600000	7690000	17700000
Cox6c2	P11951	Cytochrome c oxidase subunit 6C-2	8.4548	28000000	7070000	17600000
Marcksl1	Q9EPH2	MARCKS-related protein	19.847	17000000	17800000	17400000
Rpl26	P12749	60S ribosomal protein L26	17.277	33400000	1300000	17400000
Rps9	P29314	40S ribosomal protein S9	22.591	27300000	7390000	17300000
Pgrmc1	P70580	Membrane-associated progesterone receptor component 1	21.598	17900000	16400000	17100000
Rps23	P62268	40S ribosomal protein S23	15.807	25200000	8460000	16800000
Rpl13	P41123	60S ribosomal protein L13	24.309	25600000	8010000	16800000
Psmb3	P40112	Proteasome subunit beta type-3	22.965	25300000	8050000	16700000
Cct4	Q7TPB1	T-complex protein 1 subunit delta	58.099	25800000	7370000	16600000
Atp5f1	P19511	ATP synthase F(0) complex subunit B1, mitochondrial	28.868	24500000	8100000	16300000
Psmb2	P40307	Proteasome subunit beta type-2	22.912	27100000	5270000	16200000
Cpe	P15087	Carboxypeptidase E	53.308	24100000	8210000	16200000
Rps15	P62845	40S ribosomal protein S15	17.04	25600000	6290000	15900000
Ybx1	P62961	Nuclease-sensitive element-binding protein 1	35.73	17200000	14700000	15900000
Purb	Q68A21	Transcriptional activator protein Pur-beta	33.418	24200000	7580000	15900000
Got2	P00507	Aspartate aminotransferase, mitochondrial	47.314	21000000	10400000	15700000
Rpl13a	P35427	60S ribosomal protein L13a	23.476	20600000	10700000	15700000
Gda	Q9WTT6	Guanine deaminase	51.016	17900000	12900000	15400000
Rps3a	P49242	40S ribosomal protein S3a	29.945	24800000	5830000	15300000
Tceb2	P62870	Transcription elongation factor B polypeptide 2	13.17	24500000	6090000	15300000
Psma6	P60901	Proteasome subunit alpha type-6	27.399	20800000	9660000	15200000
Rpl36	P39032	60S ribosomal protein L36	12.268	23600000	6750000	15200000
Rplp0	P19945	60S acidic ribosomal protein P0	34.215	25800000	4480000	15100000
Ptbp2	Q66H20	Polypyrimidine tract-binding protein 2	57.488	23700000	5450000	14600000
Lztfl1	Q562C6	Leucine zipper transcription factor-like protein 1	34.638	24300000	4480000	14400000
Psma2	P17220	Proteasome subunit alpha type-2	25.926	23400000	5350000	14400000
Arpc2	P85970	Actin-related protein 2/3 complex subunit 2	34.391	20500000	7960000	14200000
Rpl18a	P62718	60S ribosomal protein L18a	20.732	18800000	9610000	14200000
Dpysl4	Q62951	Dihydropyrimidinase-related protein 4 (Fragment)	61.085	19200000	9050000	14100000
Hsp90b1	Q66HD0	Endoplasmin	92.77	23400000	4500000	13900000
Cd81	Q62745	CD81 antigen	25.888	19500000	8310000	13900000
Hnrnph1	Q8VHV7	Heterogeneous nuclear ribonucleoprotein H	49.188	19900000	7840000	13900000
Rps19	P17074	40S ribosomal protein S19	16.085	23100000	4070000	13600000
Cmpk1	Q4KM73	UMP-CMP kinase	22.169	20300000	6900000	13600000
Nme1	Q05982	Nucleoside diphosphate kinase A	17.193	15200000	11800000	13500000
Rps4x	P62703	40S ribosomal protein S4, X isoform	29.597	20400000	6440000	13400000
Ddost	Q641Y0	Dolichyl-diphosphooligosaccharide--protein glycosyltransferase 48 kDa subunit	48.895	19100000	7750000	13400000
Hist1h1b	D3ZBN0	Histone H1.5	22.649	20400000	6340000	13400000
Pdia3	P11598	Protein disulfide-isomerase A3	56.623	19400000	7170000	13300000
Ilf2	Q7TP98	Interleukin enhancer-binding factor 2	51.38	20200000	5890000	13000000
Slc25a11	P97700	Mitochondrial 2-oxoglutarate/malate carrier protein	34.133	20800000	4930000	12900000
Rpl3	P21531	60S ribosomal protein L3	46.135	20900000	4740000	12800000
Ndufa5	Q63362	NADH dehydrogenase [ubiquinone] 1 alpha subcomplex subunit 5	13.412	21100000	4520000	12800000
Atp5l	Q6PDU7	ATP synthase subunit g, mitochondrial	11.433	20700000	4720000	12700000
Elavl2	Q8CH84	ELAV-like protein 2	39.505	24200000	838000	12500000
Rpl17	P24049	60S ribosomal protein L17	21.397	20800000	4150000	12500000
Mpc2	P38718	Mitochondrial pyruvate carrier 2	14.258	20800000	3540000	12200000
Cox6a1	P10818	Cytochrome c oxidase subunit 6A1, mitochondrial	12.301	17500000	6780000	12100000
Pdia6	Q63081	Protein disulfide-isomerase A6	48.173	19500000	4700000	12100000
Pdxk	O35331	Pyridoxal kinase	34.908	18400000	5730000	12000000
Emc8	Q5FVL2	ER membrane protein complex subunit 8	23.405	3640000	20300000	12000000
Aars	P50475	Alanine--tRNA ligase, cytoplasmic	106.79	15800000	8030000	11900000
Serpine2	P07092	Glia-derived nexin	44.063	22600000	1160000	11900000
Psma3	P18422	Proteasome subunit alpha type-3	28.419	18700000	4860000	11800000
Itpa	D3ZW55	Inosine triphosphate pyrophosphatase	21.927	12900000	10400000	11700000
Rpl4	P50878	60S ribosomal protein L4	47.256	17100000	5990000	11600000
Rpl23	P62832	60S ribosomal protein L23	14.865	20100000	3040000	11500000
Gnaq	P82471	Guanine nucleotide-binding protein G(q) subunit alpha	42.144	13500000	9470000	11500000
Stx12	G3V7P1	Syntaxin-12	31.187	14000000	8930000	11500000
Psma1	P18420	Proteasome subunit alpha type-1	29.517	14700000	8160000	11400000
Rpl10	Q6PDV7	60S ribosomal protein L10	24.604	16500000	6260000	11400000
Psma5	P34064	Proteasome subunit alpha type-5	26.391	13500000	9260000	11400000
Tmed10	Q63584	Transmembrane emp24 domain-containing protein 10	24.857	20500000	2200000	11300000
Cycs	P62898	Cytochrome c, somatic	11.605	13700000	8900000	11300000
Gpm6b	Q9JJK1	Neuronal membrane glycoprotein M6-b	28.973	13200000	9300000	11300000
Uqcrq	Q7TQ16	Cytochrome b-c1 complex subunit 8	9.8492	8750000	13700000	11200000
Psmb5	P28075	Proteasome subunit beta type-5	28.585	15100000	7260000	11200000
Rps2	P27952	40S ribosomal protein S2	31.231	18400000	3820000	11100000
Reep5	B2RZ37	Receptor expression-enhancing protein 5	21.431	14800000	7190000	11000000
Sdcbp	Q9JI92	Syntenin-1	32.423	16500000	5470000	11000000
Hn1	Q6AXU6	Hematological and neurological expressed 1 protein	15.575	14700000	7200000	11000000
Hmgb2	P52925	High mobility group protein B2	24.159	19400000	2520000	10900000
Rpl8	P62919	60S ribosomal protein L8	28.024	18400000	3480000	10900000
Rpl24	P83732	60S ribosomal protein L24	17.779	18700000	3010000	10800000
Lsamp	Q62813	Limbic system-associated membrane protein	37.324	15700000	5940000	10800000
Hsd17b10	O70351	3-hydroxyacyl-CoA dehydrogenase type-2	27.245	17700000	3960000	10800000
Hnrnpdl	Q3SWU3	Heterogeneous nuclear ribonucleoprotein D-like	35.294	15300000	6280000	10800000
Cat	P04762	Catalase	59.756	16500000	4920000	10700000
Rbmx	Q4V898	RNA-binding motif protein, X chromosome	42.257	16600000	4740000	10700000
Chmp3	Q8CGS4	Charged multivesicular body protein 3	25.062	21300000	64700	10700000
Banf1	Q9R1T1	Barrier-to-autointegration factor	10.044	18500000	2220000	10400000
Ndrg1	Q6JE36	Protein NDRG1	42.954	9090000	11500000	10300000
Lmnb1	P70615	Lamin-B1	66.606	14600000	5630000	10100000
Oat	P04182	Ornithine aminotransferase, mitochondrial	48.332	16300000	3650000	9990000
Rpl15	P61314	60S ribosomal protein L15	24.146	15600000	4020000	9810000
Cirbp	P60825	Cold-inducible RNA-binding protein	18.607	16100000	3360000	9720000
Rps5	P24050	40S ribosomal protein S5	22.878	12500000	6870000	9680000
Rpn2	P25235	Dolichyl-diphosphooligosaccharide--protein glycosyltransferase subunit 2	69.077	16000000	3390000	9670000
Ppp1ca	P62138	Serine/threonine-protein phosphatase PP1-alpha catalytic subunit	37.512	13000000	6240000	9610000
Pcyox1	Q99ML5	Prenylcysteine oxidase	56.287	15300000	3900000	9600000
Uqcrh	Q5M9I5	Cytochrome b-c1 complex subunit 6, mitochondrial	10.424	11800000	7310000	9540000
Vapa	Q9Z270	Vesicle-associated membrane protein-associated protein A	27.841	11600000	7400000	9490000
Rpl32	P62912	60S ribosomal protein L32	15.86	17000000	1990000	9480000
Skp1	Q6PEC4	S-phase kinase-associated protein 1	18.672	10300000	8630000	9480000
Psmb6	P28073	Proteasome subunit beta type-6	25.289	12500000	6380000	9440000
Prkar2a	P12368	cAMP-dependent protein kinase type II-alpha regulatory subunit	45.54	12500000	6280000	9400000
Lin7c	Q792I0	Protein lin-7 homolog C	21.834	12800000	5730000	9280000
Pfkm	P47858	6-phosphofructokinase, muscle type	85.559	13500000	4950000	9220000
Tceb1	P83941	Transcription elongation factor B polypeptide 1	12.473	11700000	6610000	9130000
C3	P01026	Complement C3	186.46	16500000	1720000	9130000
Ssr4	Q07984	Translocon-associated protein subunit delta	18.979	15300000	2890000	9100000
Prune	Q6AYG3	Protein prune homolog	49.998	12400000	5790000	9100000
Glrx3	Q9JLZ1	Glutaredoxin-3	37.849	12300000	5880000	9070000
Dad1	P61805	Dolichyl-diphosphooligosaccharide--protein glycosyltransferase subunit DAD1	12.497	12700000	5440000	9050000
Syt5	P47861	Synaptotagmin-5	43.126	11200000	6870000	9030000
Eif1a	Q6VV72	Eukaryotic translation initiation factor 1A	16.502	16500000	1490000	9010000
Trim2	D3ZQG6	Tripartite motif-containing protein 2	81.426	11600000	6280000	8960000
C1qbp	O35796	Complement component 1 Q subcomponent-binding protein, mitochondrial	30.997	9360000	8520000	8940000
Sfxn1	Q63965	Sideroflexin-1	35.546	10500000	7370000	8920000
Ilf3	Q9JIL3	Interleukin enhancer-binding factor 3	95.934	16300000	1520000	8890000
Cox5a	P11240	Cytochrome c oxidase subunit 5A, mitochondrial	16.129	10700000	7060000	8870000
Atox1	Q9WUC4	Copper transport protein ATOX1	7.2924	13500000	4210000	8860000
Impa1	P97697	Inositol monophosphatase 1	30.511	11200000	6490000	8850000
Myl12b	P18666	Myosin regulatory light chain 12B	19.838	13200000	4480000	8840000
Idi1	O35760	Isopentenyl-diphosphate Delta-isomerase 1	26.396	10600000	7010000	8780000
Rad23b	Q4KMA2	UV excision repair protein RAD23 homolog B	43.496	11100000	6320000	8740000
Ddt	P80254	D-dopachrome decarboxylase	13.133	11600000	5800000	8720000
Mtnd4	P05508	NADH-ubiquinone oxidoreductase chain 4	51.8	14700000	2550000	8650000
Hsbp1	Q8K3X8	Heat shock factor-binding protein 1	8.5847	9930000	7290000	8610000
Clstn1	Q6Q0N0	Calsyntenin-1	106.26	16300000	844000	8580000
Psmb1	P18421	Proteasome subunit beta type-1	26.479	11500000	5480000	8510000
Fbl	P22509	rRNA 2-O-methyltransferase fibrillarin	34.221	14700000	2330000	8500000
Vgf	P20156	Neurosecretory protein VGF	68.178	11800000	5160000	8460000
Sumo2	P61959	Small ubiquitin-related modifier 2	10.871	4310000	12600000	8430000
Syncrip	Q7TP47	Heterogeneous nuclear ribonucleoprotein Q	59.71	14300000	2550000	8400000
Rpl27a	P18445	60S ribosomal protein L27a	16.618	14700000	1950000	8340000
Agrn	P25304	Agrin	208.64	10500000	6120000	8320000
Rpl11	P62914	60S ribosomal protein L11	20.252	11700000	4960000	8320000
Mt-atp8	P11608	ATP synthase protein 8	7.6419	8710000	7760000	8230000
Eif3h	Q6P9U8	Eukaryotic translation initiation factor 3 subunit H	39.905	15900000	399000	8150000
Pspc1	Q4KLH4	Paraspeckle component 1	58.759	12200000	4060000	8120000
Rpn1	P07153	Dolichyl-diphosphooligosaccharide--protein glycosyltransferase subunit 1	68.303	13700000	2510000	8110000
Ntm	Q62718	Neurotrimin	37.998	9250000	6920000	8090000
Ctnnb1	Q9WU82	Catenin beta-1	85.454	10600000	5340000	7980000
Rps26	P62856	40S ribosomal protein S26	13.015	12500000	3460000	7960000
Kif5c	P56536	Kinesin heavy chain isoform 5C (Fragment)	27.165	10400000	5460000	7930000
Rps21	P05765	40S ribosomal protein S21	9.1272	14000000	1720000	7840000
Eif4a3	Q3B8Q2	Eukaryotic initiation factor 4A-III	46.84	13500000	1790000	7670000
Psmb4	P34067	Proteasome subunit beta type-4	29.197	10800000	4540000	7650000
Timm13	P62076	Mitochondrial import inner membrane translocase subunit Tim13	10.458	4890000	10400000	7650000
Cmas	P69060	N-acylneuraminate cytidylyltransferase	48.129	13700000	1560000	7650000
Vps29	B2RZ78	Vacuolar protein sorting-associated protein 29	20.468	9000000	5970000	7480000
Taldo1	Q9EQS0	Transaldolase	37.46	10500000	4490000	7470000
Rab10	P35281	Ras-related protein Rab-10	22.858	9240000	5510000	7380000
Epb41l1	Q9WTP0	Band 4.1-like protein 1	98.242	8550000	6160000	7360000
Psmc5	P62198	26S protease regulatory subunit 8	45.626	10900000	3750000	7320000
Myo5a	Q9QYF3	Unconventional myosin-Va	211.76	10000000	4590000	7300000
Manf	P0C5H9	Mesencephalic astrocyte-derived neurotrophic factor	20.388	14500000	117000	7300000
Rcn2	Q62703	Reticulocalbin-2	37.432	8930000	5640000	7280000
Scg2	P10362	Secretogranin-2	71.03	10900000	3700000	7280000
Arl6ip5	Q9ES40	PRA1 family protein 3	21.548	8740000	5780000	7260000
Hnrnpm	Q62826	Heterogeneous nuclear ribonucleoprotein M	73.782	12000000	2040000	6990000
Hnrnpf	Q794E4	Heterogeneous nuclear ribonucleoprotein F	45.729	10400000	3290000	6870000
Ddah1	O08557	N(G),N(G)-dimethylarginine dimethylaminohydrolase 1	31.426	7340000	6400000	6870000
Tmem35	Q6JAM9	Transmembrane protein 35	18.473	9800000	3920000	6860000
Pkia	P63249	cAMP-dependent protein kinase inhibitor alpha	7.9604	7150000	6550000	6850000
Ssb	P38656	Lupus La protein homolog	47.777	11600000	2120000	6850000
Ndufa9	Q5BK63	NADH dehydrogenase [ubiquinone] 1 alpha subcomplex subunit 9, mitochondrial	42.559	10700000	2970000	6830000
Tomm22	Q75Q41	Mitochondrial import receptor subunit TOM22 homolog	15.49	9440000	4180000	6810000
Psmc3	Q63569	26S protease regulatory subunit 6A	49.16	10300000	2870000	6590000
Scg3	P47868	Secretogranin-3	53.182	10000000	3120000	6580000
Magoh	Q27W02	Protein mago nashi homolog	17.163	9580000	3420000	6500000
Anp32a	P49911	Acidic leucine-rich nuclear phosphoprotein 32 family member A	28.564	7210000	5780000	6490000
Tomm70a	Q75Q39	Mitochondrial import receptor subunit TOM70	67.444	9990000	2950000	6470000
Timm9	Q9WV97	Mitochondrial import inner membrane translocase subunit Tim9	10.376	9740000	3090000	6410000
Gars	Q5I0G4	Glycine--tRNA ligase (Fragment)	72.029	9190000	3510000	6350000
Tra2b	P62997	Transformer-2 protein homolog beta	33.665	10200000	2410000	6320000
Tomm40	Q75Q40	Mitochondrial import receptor subunit TOM40 homolog	37.919	9900000	2660000	6280000
Hsd17b12	Q6P7R8	Estradiol 17-beta-dehydrogenase 12	34.84	10800000	1760000	6270000
Trappc3	Q5U1Z2	Trafficking protein particle complex subunit 3	20.302	8060000	4160000	6110000
Sar1b	Q5HZY2	GTP-binding protein SAR1b	22.41	9570000	2630000	6100000
Psmd1	O88761	26S proteasome non-ATPase regulatory subunit 1	105.75	9020000	2990000	6000000
Tomm20	Q62760	Mitochondrial import receptor subunit TOM20 homolog	16.284	8550000	3410000	5980000
Slc25a1	P32089	Tricarboxylate transport protein, mitochondrial	33.835	9510000	2440000	5980000
Sars	Q6P799	Serine--tRNA ligase, cytoplasmic	58.587	8070000	3860000	5960000
Psmd11	F1LMZ8	26S proteasome non-ATPase regulatory subunit 11	47.463	9150000	2700000	5930000
Mpc1	P63031	Mitochondrial pyruvate carrier 1	12.454	9900000	1880000	5890000
Prdx4	Q9Z0V5	Peroxiredoxin-4	31.007	6890000	4520000	5700000
Kdelr1	Q569A6	ER lumen protein retaining receptor 1	24.546	9160000	2240000	5700000
Idh3B	Q68FX0	Isocitrate dehydrogenase [NAD] subunit beta, mitochondrial	42.353	7970000	3380000	5680000
Ctsd	P24268	Cathepsin D	44.68	10300000	826000	5580000
Ppid	Q6DGG0	Peptidyl-prolyl cis-trans isomerase D	40.765	8030000	3000000	5510000
Hyou1	Q63617	Hypoxia up-regulated protein 1	111.29	9140000	1880000	5510000
Aprt	P36972	Adenine phosphoribosyltransferase	19.546	6960000	4030000	5490000
Bsg	P26453	Basigin	42.435	6700000	4210000	5460000
Pgap1	Q765A7	GPI inositol-deacylase	104.38	9270000	1620000	5450000
Eif2s3	P81795	Eukaryotic translation initiation factor 2 subunit 3	51.079	8390000	2500000	5440000
Srsf2	Q6PDU1	Serine/arginine-rich splicing factor 2	25.476	8320000	2560000	5440000
Lypla2	Q9QYL8	Acyl-protein thioesterase 2	24.807	8790000	1990000	5390000
Ppp1r14b	Q8K3F3	Protein phosphatase 1 regulatory subunit 14B	15.957	4200000	6450000	5330000
Mvd	Q62967	Diphosphomevalonate decarboxylase	43.902	6040000	4530000	5280000
Pcsk1n	Q9QXU9	ProSAAS	27.414	5950000	4610000	5280000
Pdxp	Q8VD52	Pyridoxal phosphate phosphatase	33.114	6650000	3890000	5270000
Srsf5	Q09167	Serine/arginine-rich splicing factor 5	30.891	7170000	3170000	5170000
Dpp3	O55096	Dipeptidyl peptidase 3	83.038	5380000	4940000	5160000
Tufm	P85834	Elongation factor Tu, mitochondrial	49.522	7860000	2450000	5160000
Idh3g	P41565	Isocitrate dehydrogenase [NAD] subunit gamma 1, mitochondrial	42.851	7570000	2710000	5140000
Pfdn2	B0BN18	Prefoldin subunit 2	16.58	8410000	1850000	5130000
Vim	P31000	Vimentin	53.732	8190000	2030000	5110000
Prpf19	Q9JMJ4	Pre-mRNA-processing factor 19	55.238	6290000	3910000	5100000
Rbfox2	A1A5R1	RNA binding protein fox-1 homolog 2	45.55	8240000	1950000	5100000
Capza1	B2GUZ5	F-actin-capping protein subunit alpha-1	32.909	6400000	3730000	5070000
Chmp5	Q4QQV8	Charged multivesicular body protein 5	24.575	3460000	6630000	5040000
Gale	P18645	UDP-glucose 4-epimerase	38.224	9660000	392000	5030000
Cops8	Q6P4Z9	COP9 signalosome complex subunit 8	23.235	5870000	4170000	5020000
Kpnb1	P52296	Importin subunit beta-1	97.123	7400000	2640000	5020000
Ppp2r1b	Q4QQT4	Serine/threonine-protein phosphatase 2A 65 kDa regulatory subunit A beta isoform	66.006	6700000	3220000	4960000
Slc17a7	Q62634	Vesicular glutamate transporter 1	61.665	5170000	4740000	4960000
Trim28	O08629	Transcription intermediary factor 1-beta	88.955	6120000	3790000	4950000
Khsrp	Q99PF5	Far upstream element-binding protein 2	74.226	6690000	3180000	4940000
Ncln	Q5XIA1	Nicalin	62.992	9020000	804000	4910000
Tfrc	Q99376	Transferrin receptor protein 1 (Fragment)	70.152	7710000	2060000	4880000
Nudc	Q63525	Nuclear migration protein nudC	38.412	6680000	3040000	4860000
Rpl19	P84100	60S ribosomal protein L19	23.466	6260000	3420000	4840000
Ndufs6	P52504	NADH dehydrogenase [ubiquinone] iron-sulfur protein 6, mitochondrial	12.782	7560000	2050000	4810000
Nova1	Q80WA4	RNA-binding protein Nova-1 (Fragment)	48.443	8340000	1190000	4770000
Dhcr7	Q9Z2Z8	7-dehydrocholesterol reductase	54.154	7170000	2360000	4770000
Nhp2l1	P55770	NHP2-like protein 1	14.173	7210000	2270000	4740000
Arpc5	Q4KLF8	Actin-related protein 2/3 complex subunit 5	16.32	4140000	5310000	4730000
Fam213b	D3ZVR7	Prostamide/prostaglandin F synthase	21.607	7090000	2330000	4710000
Tpm1	P04692	Tropomyosin alpha-1 chain	32.68	5780000	3620000	4700000
Tmed9	Q5I0E7	Transmembrane emp24 domain-containing protein 9	27.028	8200000	1160000	4680000
Actn4	Q9QXQ0	Alpha-actinin-4	104.91	5970000	3370000	4670000
Gabarapl1	Q0VGK0	Gamma-aminobutyric acid receptor-associated protein-like 1	14.044	6410000	2880000	4650000
Timm8a	Q9WVA1	Mitochondrial import inner membrane translocase subunit Tim8 A	11.042	4600000	4630000	4620000
Hmgn2	P18437	Non-histone chromosomal protein HMG-17	9.3654	8480000	568000	4530000
Ddah2	Q6MG60	N(G),N(G)-dimethylarginine dimethylaminohydrolase 2	29.688	5110000	3890000	4500000
Suclg1	P13086	Succinyl-CoA ligase [ADP/GDP-forming] subunit alpha, mitochondrial	36.148	7020000	1910000	4470000
Nsdhl	Q5PPL3	Sterol-4-alpha-carboxylate 3-dehydrogenase, decarboxylating	40.411	6690000	2210000	4450000
Arl2	O08697	ADP-ribosylation factor-like protein 2	20.836	7500000	1360000	4430000
Lhpp	Q5I0D5	Phospholysine phosphohistidine inorganic pyrophosphate phosphatase	29.19	6420000	2410000	4410000
Mtco1	P05503	Cytochrome c oxidase subunit 1	56.936	8530000	297000	4410000
Hp1bp3	Q6P747	Heterochromatin protein 1-binding protein 3	60.806	6010000	2820000	4410000
Rpl31	P62902	60S ribosomal protein L31	14.463	6630000	2040000	4340000
Psmb7	Q9JHW0	Proteasome subunit beta type-7	29.927	5100000	3550000	4320000
Aldh2	P11884	Aldehyde dehydrogenase, mitochondrial	56.488	6230000	2360000	4300000
Aco1	Q63270	Cytoplasmic aconitate hydratase	98.126	5590000	2950000	4270000
Gnb2l1	P63245	Guanine nucleotide-binding protein subunit beta-2-like 1	35.076	5920000	2600000	4260000
P4hb	P04785	Protein disulfide-isomerase	56.951	6760000	1730000	4240000
Arpp19	Q712U5	cAMP-regulated phosphoprotein 19	12.293	6140000	2320000	4230000
Paics	P51583	Multifunctional protein ADE2	47.096	5260000	3100000	4180000
Cyb5a	P00173	Cytochrome b5	15.355	5920000	2410000	4160000
Anxa5	P14668	Annexin A5	35.744	4980000	3300000	4140000
A1m	Q63041	Alpha-1-macroglobulin	167.12	7630000	634000	4130000
Acaa1a	P21775	3-ketoacyl-CoA thiolase A, peroxisomal	43.833	6250000	2000000	4120000
Spon1	P35446	Spondin-1	90.772	7600000	596000	4100000
Dars	P15178	Aspartate--tRNA ligase, cytoplasmic	57.126	7170000	996000	4080000
Nov	Q9QZQ5	Protein NOV homolog	38.509	7470000	663000	4070000
Scg5	P27682	Neuroendocrine protein 7B2	23.683	5630000	2500000	4060000
Wars	Q6P7B0	Tryptophan--tRNA ligase, cytoplasmic	54.143	5970000	2130000	4050000
Glg1	Q62638	Golgi apparatus protein 1	133.56	7800000	297000	4050000
Aldh9a1	Q9JLJ3	4-trimethylaminobutyraldehyde dehydrogenase	53.652	5840000	2230000	4040000
Mgea5	Q8VIJ5	Bifunctional protein NCOAT	102.92	4910000	3080000	3990000
Gstm3	P08009	Glutathione S-transferase Yb-3	25.68	5310000	2650000	3980000
Pcp4	P63055	Purkinje cell protein 4	6.8073	4200000	3700000	3950000
Slit1	O88279	Slit homolog 1 protein	167.5	7550000	331000	3940000
Rars	P40329	Arginine--tRNA ligase, cytoplasmic	75.81	6720000	1120000	3920000
Abi1	Q9QZM5	Abl interactor 1	51.704	5300000	2490000	3900000
Capns1	Q64537	Calpain small subunit 1	28.57	5170000	2570000	3870000
Psip1	Q812D1	PC4 and SFRS1-interacting protein	59.638	6560000	1170000	3870000
Lamp1	P14562	Lysosome-associated membrane glycoprotein 1	43.969	6520000	1190000	3850000
Fabp7	P55051	Fatty acid-binding protein, brain	14.864	6200000	1460000	3830000
Sdc4	P34901	Syndecan-4	21.962	4190000	3450000	3820000
Higd1a	Q8VH49	HIG1 domain family member 1A, mitochondrial	10.301	4770000	2810000	3790000
Tmem14c	Q924P2	Transmembrane protein 14C	11.776	5910000	1590000	3750000
Mt-atp6	P05504	ATP synthase subunit a	25.05	7320000	139000	3730000
H1f0	P43278	Histone H1.0	20.885	6110000	1200000	3650000
Pycrl	Q5PQJ6	Pyrroline-5-carboxylate reductase 3	28.878	6150000	1120000	3630000
Cask	Q62915	Peripheral plasma membrane protein CASK	103.26	4900000	2330000	3620000
Cdv3	Q5XIM5	Protein CDV3 homolog	24.31	2310000	4910000	3610000
Caprin1	Q5M9G3	Caprin-1	78.12	5160000	2000000	3580000
Nucb1	Q63083	Nucleobindin-1	53.506	6200000	967000	3580000
Sec61a1	P61621	Protein transport protein Sec61 subunit alpha isoform 1	52.264	6300000	853000	3580000
Mvk	P17256	Mevalonate kinase	41.987	3960000	3160000	3560000
Erp29	P52555	Endoplasmic reticulum resident protein 29	28.574	5030000	2040000	3540000
Srgap2	D4A208	SLIT-ROBO Rho GTPase-activating protein 2	120.88	3600000	3460000	3530000
Top1	Q9WUL0	DNA topoisomerase 1	90.759	5210000	1820000	3510000
Aplp2	P15943	Amyloid-like protein 2	86.882	5730000	1300000	3510000
Nop58	Q9QZ86	Nucleolar protein 58	60.07	5710000	1220000	3470000
Ndufs2	Q641Y2	NADH dehydrogenase [ubiquinone] iron-sulfur protein 2, mitochondrial	52.561	4600000	2320000	3460000
Cdipt	P70500	CDP-diacylglycerol--inositol 3-phosphatidyltransferase	23.613	5650000	1260000	3460000
Tmed7	D3ZTX0	Transmembrane emp24 domain-containing protein 7	25.479	6080000	825000	3450000
Timm10	P62074	Mitochondrial import inner membrane translocase subunit Tim10	10.333	6180000	718000	3450000
Plgrkt	D4ACN8	Plasminogen receptor (KT)	17.312	5780000	1060000	3420000
Dnajb11	Q6TUG0	DnaJ homolog subfamily B member 11	40.495	6120000	711000	3420000
Khdrbs3	Q9JLP1	KH domain-containing, RNA-binding, signal transduction-associated protein 3	38.779	5350000	1420000	3390000
Rpl35a	P04646	60S ribosomal protein L35a	12.554	4970000	1800000	3390000
Rbm8a	Q27W01	RNA-binding protein 8A	19.889	4170000	2560000	3370000
Tmem132a	Q80WF4	Transmembrane protein 132A	110.57	4570000	2150000	3360000
Minos1	B2RYW8	Mitochondrial inner membrane organizing system protein 1	8.5498	6370000	337000	3360000
Chtop	Q498T2	Chromatin target of PRMT1 protein	26.516	5120000	1580000	3350000
Slc25a18	Q505J6	Mitochondrial glutamate carrier 2	34.17	5260000	1430000	3350000
Hadha	Q64428	Trifunctional enzyme subunit alpha, mitochondrial	82.664	5450000	1240000	3350000
Rpl28	P17702	60S ribosomal protein L28	15.848	4430000	2210000	3320000
Tpm4	P09495	Tropomyosin alpha-4 chain	28.509	5370000	1220000	3290000
Gnb4	O35353	Guanine nucleotide-binding protein subunit beta-4	37.363	4090000	2460000	3270000
Ndufs4	Q5XIF3	NADH dehydrogenase [ubiquinone] iron-sulfur protein 4, mitochondrial	19.74	4380000	2160000	3270000
Arrb1	P29066	Beta-arrestin-1	47.019	3900000	2630000	3260000
Ddb1	Q9ESW0	DNA damage-binding protein 1	126.86	5510000	935000	3220000
Syt11	O08835	Synaptotagmin-11	48.267	5850000	589000	3220000
Kdelr2	Q5U305	ER lumen protein retaining receptor 2	24.454	5550000	829000	3190000
Slc22a17	Q9P290	Solute carrier family 22 member 17	55.801	5310000	1040000	3180000
Chp1	P61023	Calcineurin B homologous protein 1	22.432	3280000	2890000	3090000
Blmh	P70645	Bleomycin hydrolase	52.322	4520000	1630000	3070000
Rras	D3Z8L7	Ras-related protein R-Ras	23.909	4520000	1610000	3060000
Nutf2	P61972	Nuclear transport factor 2	14.478	3160000	2920000	3040000
Vti1a	Q9JI51	Vesicle transport through interaction with t-SNAREs homolog 1A	26.042	3880000	2090000	2980000
Dpp6	P46101	Dipeptidyl aminopeptidase-like protein 6	97.301	3990000	1910000	2950000
Tmco1	Q5I0H4	Transmembrane and coiled-coil domains protein 1	21.175	4700000	1180000	2940000
Scarb2	P27615	Lysosome membrane protein 2	54.09	5190000	671000	2930000
Vkorc1l1	Q6TEK3	Vitamin K epoxide reductase complex subunit 1-like protein 1	19.778	4930000	918000	2930000
Mpst	P97532	3-mercaptopyruvate sulfurtransferase	32.94	3620000	2180000	2900000
Olfm1	Q62609	Noelin	55.441	5130000	630000	2880000
Atpif1	Q03344	ATPase inhibitor, mitochondrial	12.248	2570000	3190000	2880000
Mfge8	P70490	Lactadherin	47.412	4170000	1520000	2850000
Sarnp	Q498U4	SAP domain-containing ribonucleoprotein	23.605	4530000	1160000	2840000
U2af1l4	Q7TP17	Splicing factor U2AF 26 kDa subunit	25.836	4130000	1540000	2830000
Atp6ap2	Q6AXS4	Renin receptor	39.081	3770000	1880000	2820000
Blvra	P46844	Biliverdin reductase A	33.565	1340000	4290000	2810000
Fam65a	Q4FZU8	Protein FAM65A	131.73	5270000	307000	2790000
Fam162a	Q4QQV3	Protein FAM162A	17.827	3410000	2150000	2780000
Yars	Q4KM49	Tyrosine--tRNA ligase, cytoplasmic	59.115	4330000	1200000	2770000
Prnp	P13852	Major prion protein	27.804	3650000	1870000	2760000
Itm2c	Q5PQL7	Integral membrane protein 2C	30.48	4220000	1300000	2760000
Gad2	Q05683	Glutamate decarboxylase 2	65.402	4150000	1310000	2730000
Lzic	Q5PQN7	Protein LZIC	21.394	4900000	564000	2730000
Alcam	O35112	CD166 antigen	65.021	3190000	2250000	2720000
Eif3b	Q4G061	Eukaryotic translation initiation factor 3 subunit B	90.91	4420000	982000	2700000
Mdk	Q9R1S9	Midkine	15.406	4090000	1270000	2680000
Ier3ip1	P85007	Immediate early response 3-interacting protein 1	8.9987	2300000	3050000	2680000
Gnai3	P08753	Guanine nucleotide-binding protein G(k) subunit alpha	40.522	4080000	1260000	2670000
Mest	Q6P5P5	Mesoderm-specific transcript homolog protein	38.879	4490000	838000	2660000
Ccdc47	Q5U2X6	Coiled-coil domain-containing protein 47	55.732	4920000	406000	2660000
Erlin2	B5DEH2	Erlin-2	37.71	4580000	659000	2620000
Baiap2	Q6GMN2	Brain-specific angiogenesis inhibitor 1-associated protein 2	59.182	3200000	2030000	2620000
Mmgt1	B5DF51	Membrane magnesium transporter 1	14.677	3480000	1690000	2580000
Ppat	P35433	Amidophosphoribosyltransferase	57.436	5130000	7540	2570000
Mcts1	Q4G009	Malignant T-cell-amplified sequence 1	20.55	4610000	499000	2560000
Sept9	Q9QZR6	Septin-9	63.791	4090000	1000000	2540000
Clstn3	Q8R553	Calsyntenin-3	105.94	4320000	753000	2540000
Srcin1	Q9QXY2	SRC kinase signaling inhibitor 1	129.74	3340000	1720000	2530000
Arcn1	Q66H80	Coatomer subunit delta	57.199	4350000	705000	2530000
Vars	Q04462	Valine--tRNA ligase	140.37	3910000	1140000	2520000
Anp32e	Q5XIE0	Acidic leucine-rich nuclear phosphoprotein 32 family member E	29.418	1850000	3160000	2510000
Sec13	Q5XFW8	Protein SEC13 homolog	35.547	2950000	2040000	2500000
Slc7a1	P30823	High affinity cationic amino acid transporter 1	67.266	4230000	725000	2480000
Nit2	Q497B0	Omega-amidase NIT2	30.701	2990000	1970000	2480000
Rbbp7	Q71UF4	Histone-binding protein RBBP7	47.82	3120000	1830000	2470000
Msn	O35763	Moesin	67.738	4900000	36600	2470000
Chga	P10354	Chromogranin-A	52.024	2930000	1990000	2460000
Txnrd1	O89049	Thioredoxin reductase 1, cytoplasmic	54.67	3110000	1790000	2450000
Copb2	O35142	Coatomer subunit beta	102.55	4050000	853000	2450000
Panx1	P60570	Pannexin-1	48.073	3720000	1160000	2440000
Lss	P48450	Lanosterol synthase	83.3	3330000	1540000	2440000
Acsl4	O35547	Long-chain-fatty-acid--CoA ligase 4	74.326	2660000	2160000	2410000
Itfg1	Q8R4E1	T-cell immunomodulatory protein	67.336	3670000	1120000	2390000
Eif3d	Q6AYK8	Eukaryotic translation initiation factor 3 subunit D	63.988	4170000	593000	2380000
Ppp1r14c	Q8R4R9	Protein phosphatase 1 regulatory subunit 14C	17.98	1070000	3640000	2350000
Eif6	Q3KRD8	Eukaryotic translation initiation factor 6	26.571	3170000	1530000	2350000
Ggt7	Q99MZ4	Gamma-glutamyltransferase 7	70.382	2970000	1700000	2340000
Apoe	P02650	Apolipoprotein E	35.753	3590000	1070000	2330000
Prrt1	Q6MG82	Proline-rich transmembrane protein 1	31.389	3230000	1420000	2320000
Tmeff1	Q9QYV1	Tomoregulin-1	40.143	2960000	1630000	2290000
Celf1	Q4QQT3	CUGBP Elav-like family member 1	52.205	3730000	836000	2280000
Map4	Q5M7W5	Microtubule-associated protein 4	110.3	2630000	1920000	2280000
Sod2	P07895	Superoxide dismutase [Mn], mitochondrial	24.674	3400000	1140000	2270000
Hdgf	Q8VHK7	Hepatoma-derived growth factor	26.488	4230000	284000	2260000
Chgb	O35314	Secretogranin-1	77.535	3330000	1180000	2250000
Brox	Q4V8K5	BRO1 domain-containing protein BROX	46.191	3260000	1240000	2250000
Serbp1	Q6AXS5	Plasminogen activator inhibitor 1 RNA-binding protein	44.754	2610000	1870000	2240000
Mlec	Q5FVQ4	Malectin	32.418	3630000	826000	2230000
Hmga1	Q8K585	High mobility group protein HMG-I/HMG-Y	11.706	3230000	1180000	2200000
Nucks1	Q9EPJ0	Nuclear ubiquitous casein and cyclin-dependent kinase substrate 1	27.14	3750000	650000	2200000
Ostc	B0K025	Oligosaccharyltransferase complex subunit OSTC	16.815	4120000	276000	2200000
Nap1l5	Q5PPG6	Nucleosome assembly protein 1-like 5	16.858	2740000	1640000	2190000
Tomm34	Q3KRD5	Mitochondrial import receptor subunit TOM34	34.461	3080000	1290000	2190000
Wdr77	Q4QR85	Methylosome protein 50	37.075	2760000	1590000	2170000
Metap2	P38062	Methionine aminopeptidase 2	53.051	3640000	664000	2150000
Gnas	P63095	Guanine nucleotide-binding protein G(s) subunit alpha isoforms short	45.663	2660000	1630000	2140000
Trap1	Q5XHZ0	Heat shock protein 75 kDa, mitochondrial	80.46	3430000	841000	2140000
Itm2b	Q5XIE8	Integral membrane protein 2B	30.314	3270000	1000000	2130000
Cd59	P27274	CD59 glycoprotein	13.79	3310000	932000	2120000
Grb10	P0CE43	Growth factor receptor-bound protein 10	67.882	4240000	5190	2120000
Aldh1b1	Q66HF8	Aldehyde dehydrogenase X, mitochondrial	57.624	3080000	1140000	2110000
Uggt1	Q9JLA3	UDP-glucose:glycoprotein glucosyltransferase 1	176.43	3280000	918000	2100000
Mecp2	Q00566	Methyl-CpG-binding protein 2	53.047	3680000	511000	2100000
Pgrmc2	Q5XIU9	Membrane-associated progesterone receptor component 2	23.403	2660000	1520000	2090000
Puf60	Q9WV25	Poly(U)-binding-splicing factor PUF60	60.248	3170000	998000	2080000
Ugdh	O70199	UDP-glucose 6-dehydrogenase	54.891	3870000	295000	2080000
Lppr3	Q7TMB0	Lipid phosphate phosphatase-related protein type 3	76.785	2230000	1910000	2070000
Ccbl1	Q08415	Kynurenine--oxoglutarate transaminase 1, mitochondrial	51.652	3930000	162000	2040000
Actl6b	P86173	Actin-like protein 6B	46.891	3240000	849000	2040000
Psap	P10960	Sulfated glycoprotein 1	61.123	3260000	820000	2040000
Hsd17b4	P97852	Peroxisomal multifunctional enzyme type 2	79.427	3230000	849000	2040000
Hadhb	Q60587	Trifunctional enzyme subunit beta, mitochondrial	51.414	3360000	678000	2020000
Sptbn2	Q9QWN8	Spectrin beta chain, non-erythrocytic 2	271.06	2780000	1230000	2000000
Samm50	Q6AXV4	Sorting and assembly machinery component 50 homolog	51.96	3220000	782000	2000000
Fn1	P04937	Fibronectin	272.51	3450000	523000	1990000
Prkcg	P63319	Protein kinase C gamma type	78.357	1520000	2440000	1980000
Ftl1	P02793	Ferritin light chain 1	20.748	3870000	47100	1960000
Emc2	B0BNG0	ER membrane protein complex subunit 2	34.869	3470000	444000	1960000
Kbp	Q4G074	KIF1-binding protein	71.295	314000	3560000	1940000
Lancl1	Q9QX69	LanC-like protein 1	45.239	2470000	1380000	1920000
Tmed2	Q63524	Transmembrane emp24 domain-containing protein 2	22.733	3420000	412000	1920000
Pepd	Q5I0D7	Xaa-Pro dipeptidase	54.75	3170000	662000	1920000
Nceh1	B2GV54	Neutral cholesterol ester hydrolase 1	45.821	3160000	652000	1910000
Sirt5	Q68FX9	NAD-dependent protein deacylase sirtuin-5, mitochondrial	34.098	2740000	1060000	1900000
Ssbp1	P28042	Single-stranded DNA-binding protein, mitochondrial	17.455	3430000	369000	1900000
Snrnp200	F1LNJ2	U5 small nuclear ribonucleoprotein 200 kDa helicase	244.87	3020000	739000	1880000
Prkra	Q4V8C7	Interferon-inducible double-stranded RNA-dependent protein kinase activator A	34.355	2850000	903000	1880000
Ube2z	Q3B7D1	Ubiquitin-conjugating enzyme E2 Z	38.352	2610000	1140000	1880000
Nrp1	Q9QWJ9	Neuropilin-1	103.08	2580000	1110000	1840000
Coq9	Q68FT1	Ubiquinone biosynthesis protein COQ9, mitochondrial	35.145	3560000	106000	1830000
Ttl	Q9QXJ0	Tubulin--tyrosine ligase	43.118	2090000	1570000	1830000
Atad3	Q3KRE0	ATPase family AAA domain-containing protein 3	66.758	3060000	599000	1830000
Nudt2	Q6PEC0	Bis(5-nucleosyl)-tetraphosphatase [asymmetrical]	16.929	1160000	2500000	1830000
Sep15	Q923V8	15 kDa selenoprotein	17.822	3150000	487000	1820000
Rnmt	Q5U2U7	mRNA cap guanine-N7 methyltransferase	52.816	2960000	680000	1820000
Rogdi	Q4V7D2	Protein rogdi homolog	32.205	2610000	1020000	1810000
Sdhb	P21913	Succinate dehydrogenase [ubiquinone] iron-sulfur subunit, mitochondrial	31.83	2440000	1180000	1810000
Eif3j	A0JPM9	Eukaryotic translation initiation factor 3 subunit J	29.187	2870000	739000	1800000
Gucy1a3	P19686	Guanylate cyclase soluble subunit alpha-3	77.566	2000000	1610000	1800000
Tmem33	Q9Z142	Transmembrane protein 33	27.983	2940000	648000	1790000
Ppp1r1b	Q6J4I0	Protein phosphatase 1 regulatory subunit 1B	22.912	841000	2740000	1790000
Vps26a	Q6AY86	Vacuolar protein sorting-associated protein 26A	38.114	2550000	1000000	1780000
Ssr1	Q7TPJ0	Translocon-associated protein subunit alpha	35.629	2950000	585000	1770000
Timm8b	P62078	Mitochondrial import inner membrane translocase subunit Tim8 B	9.2864	1610000	1920000	1760000
Psph	Q5M819	Phosphoserine phosphatase	24.967	2870000	656000	1760000
Selt	Q1H5H1	Selenoprotein T	22.292	344000	3180000	1760000
Carkd	D4AAT7	ATP-dependent (S)-NAD(P)H-hydrate dehydratase	36.518	2860000	654000	1760000
Serpind1	Q64268	Heparin cofactor 2	54.551	3190000	305000	1750000
Gphn	Q03555	Gephyrin	83.265	2170000	1320000	1750000
Rer1	Q498C8	Protein RER1	22.988	2880000	601000	1740000
Myadm	Q6VBQ5	Myeloid-associated differentiation marker	35.148	1370000	2070000	1720000
Ssr3	Q08013	Translocon-associated protein subunit gamma	21.064	2050000	1390000	1720000
Lmna	P48679	Prelamin-A/C	74.323	2300000	1130000	1710000
Adcyap1	P13589	Pituitary adenylate cyclase-activating polypeptide	19.557	2650000	756000	1700000
Sumo1	Q5I0H3	Small ubiquitin-related modifier 1	11.557	3040000	338000	1690000
Sec11a	P42667	Signal peptidase complex catalytic subunit SEC11A	20.599	2890000	491000	1690000
Rasgrp2	P0C643	RAS guanyl-releasing protein 2	69.291	1570000	1800000	1690000
Lxn	Q64361	Latexin	25.58	2310000	1050000	1680000
Apmap	Q7TP48	Adipocyte plasma membrane-associated protein	42.062	2880000	474000	1680000
Bax	Q63690	Apoptosis regulator BAX	21.35	2160000	1200000	1680000
Mybbp1a	O35821	Myb-binding protein 1A	152.28	2740000	594000	1670000
Lphn1	O88917	Latrophilin-1	166.61	2110000	1190000	1650000
Abhd12	Q6AYT7	Monoacylglycerol lipase ABHD12	45.295	2800000	434000	1620000
Flot1	Q9Z1E1	Flotillin-1	47.499	1920000	1310000	1610000
Grpel1	P97576	GrpE protein homolog 1, mitochondrial	24.297	2780000	446000	1610000
Lypla1	P70470	Acyl-protein thioesterase 1	24.708	2590000	631000	1610000
Tmem246	Q5EB73	Transmembrane protein 246	46.591	126000	3090000	1610000
Npy	P07808	Pro-neuropeptide Y	11.033	2680000	523000	1600000
Slc16a7	Q63344	Monocarboxylate transporter 2	53.057	1770000	1400000	1580000
Nptxr	O35764	Neuronal pentraxin receptor	52.37	2320000	828000	1570000
Gde1	Q9JL55	Glycerophosphodiester phosphodiesterase 1	37.634	2880000	262000	1570000
Dkc1	P40615	H/ACA ribonucleoprotein complex subunit 4	56.614	2770000	363000	1570000
C1qc	P31722	Complement C1q subcomponent subunit C	25.686	2610000	521000	1560000
Rnps1	Q6AYK1	RNA-binding protein with serine-rich domain 1	34.238	2890000	237000	1560000
Eif3a	Q1JU68	Eukaryotic translation initiation factor 3 subunit A	163.19	2810000	290000	1550000
Gsta3	P04904	Glutathione S-transferase alpha-3	25.319	3090000	2930	1550000
Tpp2	Q64560	Tripeptidyl-peptidase 2	138.29	2030000	1060000	1540000
Commd3	Q6P9U3	COMM domain-containing protein 3	21.932	2260000	815000	1540000
Tars	Q5XHY5	Threonine--tRNA ligase, cytoplasmic	80.575	2310000	757000	1530000
Fbxo3	D4ABP9	F-box only protein 3	55.355	2350000	709000	1530000
Pycr2	Q6AY23	Pyrroline-5-carboxylate reductase 2	33.673	2690000	370000	1530000
Ctsb	P00787	Cathepsin B	37.47	2210000	828000	1520000
Fam136a	B0BN94	Protein FAM136A	15.625	2470000	536000	1500000
Hspa13	O35162	Heat shock 70 kDa protein 13	51.795	1970000	1040000	1500000
Copg1	Q4AEF8	Coatomer subunit gamma-1	97.613	2620000	375000	1500000
Prkar1a	P09456	cAMP-dependent protein kinase type I-alpha regulatory subunit	43.094	2020000	979000	1500000
Asns	P49088	Asparagine synthetase [glutamine-hydrolyzing]	64.246	2630000	356000	1490000
Afap1	Q8VH46	Actin filament-associated protein 1	80.751	2080000	894000	1490000
Sept2	Q91Y81	Septin-2	41.592	2530000	442000	1490000
Impad1	D4AD37	Inositol monophosphatase 3	38.569	2640000	333000	1480000
Pex19	Q9QYU1	Peroxisomal biogenesis factor 19	32.497	2020000	939000	1480000
Timp2	P30121	Metalloproteinase inhibitor 2	24.356	2600000	347000	1480000
Vamp3	P63025	Vesicle-associated membrane protein 3	11.48	1040000	1900000	1470000
Ufd1l	Q9ES53	Ubiquitin fusion degradation protein 1 homolog	34.485	2000000	945000	1470000
Casp3	P55213	Caspase-3	31.491	2010000	927000	1470000
Ppp1r9b	O35274	Neurabin-2	89.645	1500000	1430000	1460000
Fam213a	Q6AXX6	Redox-regulatory protein FAM213A	25.763	2190000	731000	1460000
Emc10	Q6AYH6	ER membrane protein complex subunit 10	26.968	2210000	711000	1460000
Mob4	Q9QYW3	MOB-like protein phocein	26.032	1420000	1460000	1440000
Ndel1	Q78PB6	Nuclear distribution protein nudE-like 1	38.365	1800000	1070000	1440000
Pdcd10	Q6NX65	Programmed cell death protein 10	24.355	2150000	722000	1440000
Acyp2	P35745	Acylphosphatase-2	10.863	1940000	908000	1430000
Ubl4a	B2GV38	Ubiquitin-like protein 4A	17.79	2360000	486000	1420000
Edf1	P69736	Endothelial differentiation-related factor 1	16.369	2320000	495000	1410000
Mturn	Q5XI20	Maturin	14.832	1630000	1180000	1410000
Pgam5	Q562B5	Serine/threonine-protein phosphatase PGAM5, mitochondrial	32.06	2330000	487000	1410000
Smu1	Q99M63	WD40 repeat-containing protein SMU1	57.55	2570000	235000	1400000
Ccdc32	Q561K4	Uncharacterized protein C15orf57 homolog	20.018	1680000	1120000	1400000
Vps33b	Q63616	Vacuolar protein sorting-associated protein 33B	70.693	2640000	156000	1400000
Bhmt	O09171	Betaine--homocysteine S-methyltransferase 1	44.976	2390000	408000	1400000
Smarce1	Q56A18	SWI/SNF-related matrix-associated actin-dependent regulator of chromatin subfamily E member 1	42.831	2380000	408000	1400000
Kras	P08644	GTPase KRas	21.656	1360000	1430000	1390000
Gas7	O55148	Growth arrest-specific protein 7	48.274	2160000	620000	1390000
Src	Q9WUD9	Proto-oncogene tyrosine-protein kinase Src	59.972	1520000	1270000	1390000
Atad1	Q505J9	ATPase family AAA domain-containing protein 1	40.717	2280000	495000	1390000
Etfa	P13803	Electron transfer flavoprotein subunit alpha, mitochondrial	34.951	2240000	533000	1390000
Apoa1bp	B0BNM1	NAD(P)H-hydrate epimerase	30.89	1830000	893000	1360000
Tnr	Q05546	Tenascin-R	149.37	2250000	470000	1360000
Spcs3	Q568Z4	Signal peptidase complex subunit 3	20.16	1930000	770000	1350000
Bace1	P56819	Beta-secretase 1	55.806	1690000	996000	1350000
Safb	O88453	Scaffold attachment factor B1	104.57	1870000	810000	1340000
Spns1	Q2YDU8	Protein spinster homolog 1	56.795	1910000	764000	1340000
Homer1	Q9Z214	Homer protein homolog 1	41.304	1640000	1020000	1330000
Fbxo7	Q68FS3	F-box only protein 7	57.56	1750000	897000	1320000
Nln	P42676	Neurolysin, mitochondrial	80.253	1710000	933000	1320000
Pam	P14925	Peptidyl-glycine alpha-amidating monooxygenase	108.67	2130000	492000	1310000
Dnajb6	Q6AYU3	DnaJ homolog subfamily B member 6	38.922	1390000	1210000	1300000
Rhot2	Q7TSA0	Mitochondrial Rho GTPase 2	69.152	1600000	1010000	1300000
Acsl1	P18163	Long-chain-fatty-acid--CoA ligase 1	78.178	2010000	580000	1300000
Mat2b	Q5U2R0	Methionine adenosyltransferase 2 subunit beta	37.374	1950000	611000	1280000
Iah1	Q711G3	Isoamyl acetate-hydrolyzing esterase 1 homolog	28.004	1580000	978000	1280000
Vps4a	Q793F9	Vacuolar protein sorting-associated protein 4A	48.906	1720000	828000	1280000
Ufc1	Q6BBI8	Ubiquitin-fold modifier-conjugating enzyme 1	19.492	1960000	579000	1270000
Tssc1	Q5PPK9	Protein TSSC1	43.156	1370000	1170000	1270000
Mtdh	Q9Z1W6	Protein LYRIC	63.968	1870000	669000	1270000
Ric8a	Q80ZG1	Synembryn-A	59.832	1640000	893000	1270000
Sec31a	Q9Z2Q1	Protein transport protein Sec31A	135.27	1820000	701000	1260000
Gosr2	O35165	Golgi SNAP receptor complex member 2	24.607	2220000	306000	1260000
Nploc4	Q9ES54	Nuclear protein localization protein 4 homolog	68.055	1660000	864000	1260000
Fam210a	Q5XIJ4	Protein FAM210A	31.474	2510000	3520	1260000
Rcan1	Q6IN33	Calcipressin-1	22.948	1910000	599000	1260000
Fkbp4	Q9QVC8	Peptidyl-prolyl cis-trans isomerase FKBP4	51.45	2060000	442000	1250000
Nmt1	Q8K1Q0	Glycylpeptide N-tetradecanoyltransferase 1	56.86	2160000	312000	1240000
Nras	Q04970	GTPase NRas	21.243	1310000	1140000	1230000
Csnk1a1	P97633	Casein kinase I isoform alpha	37.495	1730000	709000	1220000
Dlg3	Q62936	Disks large homolog 3	93.538	1730000	698000	1220000
Lap3	Q68FS4	Cytosol aminopeptidase	56.149	1750000	680000	1210000
Nasp	Q66HD3	Nuclear autoantigenic sperm protein	84.199	2040000	382000	1210000
Mri1	Q5HZE4	Methylthioribose-1-phosphate isomerase	39.587	1280000	1120000	1200000
Msmo1	O35532	Methylsterol monooxygenase 1	34.963	1550000	853000	1200000
Gar1	Q6AYA1	H/ACA ribonucleoprotein complex subunit 1	23.01	2010000	386000	1200000
Pak2	Q64303	Serine/threonine-protein kinase PAK 2	57.96	1340000	1040000	1190000
Vimp	Q8VHV8	Selenoprotein S	21.385	2320000	59200	1190000
Dnajc8	Q642C0	DnaJ homolog subfamily C member 8	29.812	1880000	498000	1190000
Serpini1	Q9JLD2	Neuroserpin	46.277	2210000	155000	1180000
Lppr1	Q6WAY2	Lipid phosphate phosphatase-related protein type 1	35.886	1890000	462000	1170000
Macf1	D3ZHV2	Microtubule-actin cross-linking factor 1	619.59	1550000	797000	1170000
Farsa	Q505J8	Phenylalanine--tRNA ligase alpha subunit	57.719	1850000	485000	1170000
Tagln2	Q5XFX0	Transgelin-2	22.393	2070000	252000	1160000
Penk	P04094	Proenkephalin-A	30.932	2210000	106000	1160000
Clec2l	Q0ZCA7	C-type lectin domain family 2 member L	23.623	1720000	598000	1160000
Acot8	Q8VHK0	Acyl-coenzyme A thioesterase 8	36.003	1760000	553000	1160000
Lrpap1	Q99068	Alpha-2-macroglobulin receptor-associated protein	42.031	1730000	579000	1150000
Sirt2	Q5RJQ4	NAD-dependent protein deacetylase sirtuin-2	39.319	1660000	638000	1150000
Stx6	Q63635	Syntaxin-6	29.056	1420000	875000	1150000
Grm7	P35400	Metabotropic glutamate receptor 7	102.23	1660000	635000	1150000
Vps52	O55166	Vacuolar protein sorting-associated protein 52 homolog	82.102	1610000	664000	1140000
Ppt1	P45479	Palmitoyl-protein thioesterase 1	34.455	1990000	282000	1140000
Nrd1	P47245	Nardilysin	132.97	1700000	572000	1140000
Slc35b1	Q6V7K3	Solute carrier family 35 member B1	35.816	1970000	303000	1140000
Ubxn1	Q499N6	UBX domain-containing protein 1	33.581	1210000	1060000	1130000
Preb	Q9WTV0	Prolactin regulatory element-binding protein	45.357	1720000	523000	1120000
Aldh7a1	Q64057	Alpha-aminoadipic semialdehyde dehydrogenase	58.748	1610000	620000	1120000
Slc16a1	P53987	Monocarboxylate transporter 1	53.238	1260000	969000	1120000
Entpd6	Q9ER31	Ectonucleoside triphosphate diphosphohydrolase 6	49.899	2160000	71500	1110000
Emc3	Q5U2V8	ER membrane protein complex subunit 3	29.98	2020000	195000	1110000
Ptprz1	Q62656	Receptor-type tyrosine-protein phosphatase zeta	255.34	1410000	807000	1110000
Fdft1	Q02769	Squalene synthase	48.106	1760000	457000	1110000
Epha5	P54757	Ephrin type-A receptor 5	111.01	1620000	592000	1100000
Ppp1r11	Q6MFY6	Protein phosphatase 1 regulatory subunit 11	13.936	572000	1630000	1100000
Mink1	F1LP90	Misshapen-like kinase 1	150.38	1520000	677000	1100000
Dr1	Q5XI68	Protein Dr1	19.429	1510000	678000	1090000
Mtnd5	P11661	NADH-ubiquinone oxidoreductase chain 5	68.969	1230000	956000	1090000
Ogfr	Q9QXY4	Opioid growth factor receptor	64.727	1360000	820000	1090000
Scp2	P11915	Non-specific lipid-transfer protein	58.813	1560000	583000	1070000
Stoml2	Q4FZT0	Stomatin-like protein 2, mitochondrial	38.413	1650000	489000	1070000
Timm22	Q9JKW1	Mitochondrial import inner membrane translocase subunit Tim22	19.918	1880000	253000	1070000
Lppr4	Q7TMB7	Lipid phosphate phosphatase-related protein type 4	83.361	1070000	1060000	1070000
Calu	O35783	Calumenin	36.996	1530000	599000	1060000
Ndufv3	Q6PCU8	NADH dehydrogenase [ubiquinone] flavoprotein 3, mitochondrial	11.941	1300000	825000	1060000
Chid1	A0JPQ9	Chitinase domain-containing protein 1	44.874	1880000	244000	1060000
Sdhd	Q6PCT8	Succinate dehydrogenase [ubiquinone] cytochrome b small subunit, mitochondrial	16.976	1950000	172000	1060000
Ubap1	Q5XIS7	Ubiquitin-associated protein 1	55.139	945000	1170000	1050000
Ide	P35559	Insulin-degrading enzyme	117.71	1670000	438000	1050000
Bzw2	Q9WTT7	Basic leucine zipper and W2 domain-containing protein 2	48.049	1940000	169000	1050000
Cul5	Q9JJ31	Cullin-5	90.889	1430000	673000	1050000
Fst	P21674	Follistatin	37.838	1980000	115000	1050000
Impdh2	E9PU28	Inosine-5-monophosphate dehydrogenase 2	55.814	1420000	667000	1040000
Sf3b4	Q6AYL5	Splicing factor 3B subunit 4	44.355	1350000	711000	1030000
Gucy1b3	P20595	Guanylate cyclase soluble subunit beta-1	70.456	1200000	864000	1030000
Ivd	P12007	Isovaleryl-CoA dehydrogenase, mitochondrial	46.435	1320000	725000	1020000
Hagh	O35952	Hydroxyacylglutathione hydrolase, mitochondrial	34.109	1160000	885000	1020000
Rpl29	P25886	60S ribosomal protein L29	17.325	1760000	256000	1010000
Tbce	Q5FVQ9	Tubulin-specific chaperone E	59.042	1350000	655000	1000000
Atp1b2	P13638	Sodium/potassium-transporting ATPase subunit beta-2	33.412	1380000	615000	996000
Acp2	P20611	Lysosomal acid phosphatase	48.319	497000	1490000	994000
Rabggta	Q08602	Geranylgeranyl transferase type-2 subunit alpha	64.904	1280000	690000	986000
Sf3a2	Q6AXT8	Splicing factor 3A subunit 2	49.89	1720000	249000	982000
Pcsk2	P28841	Neuroendocrine convertase 2	70.753	1450000	505000	977000
Myg1	Q641W2	UPF0160 protein MYG1, mitochondrial	42.888	1540000	408000	976000
Echs1	P14604	Enoyl-CoA hydratase, mitochondrial	31.516	1400000	551000	974000
Atp2b3	Q64568	Plasma membrane calcium-transporting ATPase 3	138.56	1270000	672000	971000
Crebbp	Q6JHU9	CREB-binding protein	265.42	34900	1910000	970000
Wdr61	Q4V7A0	WD repeat-containing protein 61	33.746	1200000	736000	967000
Hspbp1	Q6IMX7	Hsp70-binding protein 1	39.19	1420000	511000	967000
Aldh3a2	P30839	Fatty aldehyde dehydrogenase	54.081	1590000	338000	963000
Rexo2	Q5U1X1	Oligoribonuclease, mitochondrial	26.751	934000	979000	956000
Tmem55b	Q5PPM8	Type 1 phosphatidylinositol 4,5-bisphosphate 4-phosphatase	29.993	1450000	462000	956000
Cort	Q62949	Cortistatin	12.201	1460000	453000	954000
Tcea1	Q4KLL0	Transcription elongation factor A protein 1	33.893	1680000	228000	952000
Lpl	Q06000	Lipoprotein lipase	53.082	1590000	313000	952000
Dynlt1	Q9Z336	Dynein light chain Tctex-type 1	12.452	1230000	667000	948000
Nolc1	P41777	Nucleolar and coiled-body phosphoprotein 1	73.562	1550000	340000	947000
Eml1	Q4V8C3	Echinoderm microtubule-associated protein-like 1	89.801	1340000	553000	946000
Apex1	P43138	DNA-(apurinic or apyrimidinic site) lyase	35.538	1510000	378000	942000
Cwc15	Q5BJP2	Spliceosome-associated protein CWC15 homolog	26.638	923000	957000	940000
Wrb	Q6P6S5	Tail-anchored protein insertion receptor WRB	19.899	1720000	147000	933000
Dcakd	Q6AY55	Dephospho-CoA kinase domain-containing protein	27.352	1590000	279000	933000
Gorasp2	Q9R064	Golgi reassembly-stacking protein 2	47.22	1360000	499000	929000
Mrpl23	Q63750	39S ribosomal protein L23, mitochondrial	17.05	1390000	461000	924000
Gcsh	Q5I0P2	Glycine cleavage system H protein, mitochondrial	18.485	1630000	217000	924000
Pigu	Q8CHJ1	Phosphatidylinositol glycan anchor biosynthesis class U protein	49.952	1730000	115000	922000
Eif2b5	Q64350	Translation initiation factor eIF-2B subunit epsilon	80.205	973000	871000	922000
Ak2	P29410	Adenylate kinase 2, mitochondrial	26.379	1740000	99600	919000
Jup	Q6P0K8	Junction plakoglobin	81.8	1590000	247000	918000
Bzw1	Q6P7P5	Basic leucine zipper and W2 domain-containing protein 1	48.043	1420000	407000	914000
Gcc2	D3ZZL9	GRIP and coiled-coil domain-containing protein 2	195.08	126000	1690000	909000
Etfdh	Q6UPE1	Electron transfer flavoprotein-ubiquinone oxidoreductase, mitochondrial	68.197	1430000	383000	908000
Tm2d2	Q566R2	TM2 domain-containing protein 2	22.929	1470000	341000	905000
Dnmt3a	Q1LZ53	DNA (cytosine-5)-methyltransferase 3A	101.67	1160000	650000	905000
Drap1	A0JPP1	Dr1-associated corepressor	22.326	1710000	96300	904000
Exoc6	O54923	Exocyst complex component 6	93.177	1640000	166000	903000
Ptbp1	Q00438	Polypyrimidine tract-binding protein 1	59.353	1300000	504000	902000
Madd	O08873	MAP kinase-activating death domain protein	177.99	1130000	669000	902000
Gaa	Q6P7A9	Lysosomal alpha-glucosidase	106.21	1560000	238000	900000
Strbp	Q9JKU6	Spermatid perinuclear RNA-binding protein	73.893	1560000	242000	899000
Ptgfrn	Q62786	Prostaglandin F2 receptor negative regulator	98.73	1360000	433000	899000
Acsl6	P33124	Long-chain-fatty-acid--CoA ligase 6	78.179	1500000	290000	896000
Eif2b4	Q63186	Translation initiation factor eIF-2B subunit delta	57.809	1110000	683000	894000
Ncstn	Q8CGU6	Nicastrin	78.399	1330000	453000	893000
Ikbkap	Q8VHU4	Elongator complex protein 1	149.17	1130000	654000	892000
Nucb2	Q9JI85	Nucleobindin-2	50.09	1380000	384000	882000
Bre	Q6P7Q1	BRCA1-A complex subunit BRE	43.558	1520000	247000	882000
Pip4k2a	Q9R0I8	Phosphatidylinositol 5-phosphate 4-kinase type-2 alpha	46.209	1540000	212000	878000
Clstn2	Q8VDA1	Calsyntenin-2	107.73	1680000	74200	878000
Cps1	P07756	Carbamoyl-phosphate synthase [ammonia], mitochondrial	164.58	1600000	150000	873000
Acsl5	O88813	Long-chain-fatty-acid--CoA ligase 5	76.404	1520000	222000	873000
Atp2c1	Q64566	Calcium-transporting ATPase type 2C member 1	100.5	1470000	261000	867000
Srprb	Q4FZX7	Signal recognition particle receptor subunit beta	29.569	1540000	180000	862000
Bcl2l1	P53563	Bcl-2-like protein 1	26.158	1610000	109000	860000
Vezt	Q5XI52	Vezatin	88.693	1700000	12300	855000
Znf148	Q62806	Zinc finger protein 148	88.747	1680000	11200	846000
Ak4	Q9WUS0	Adenylate kinase 4, mitochondrial	25.203	1110000	575000	842000
Akr7a2	Q8CG45	Aflatoxin B1 aldehyde reductase member 2	40.675	1440000	223000	830000
Sae1	Q6AXQ0	SUMO-activating enzyme subunit 1	38.512	1270000	387000	830000
Tsnax	Q9JHB5	Translin-associated protein X	33.005	982000	675000	828000
Copg2	D4ABY2	Coatomer subunit gamma-2	80.488	1380000	265000	824000
Adrbk1	P26817	Beta-adrenergic receptor kinase 1	79.784	1300000	332000	818000
Tp53i11	B3DMA0	Tumor protein p53-inducible protein 11	20.939	906000	712000	809000
Elp2	Q496Z0	Elongator complex protein 2	91.745	733000	877000	805000
Pqbp1	Q6PCT5	Polyglutamine-binding protein 1	30.529	717000	892000	804000
Nagk	P81799	N-acetyl-D-glucosamine kinase	37.196	763000	842000	803000
Asl	P20673	Argininosuccinate lyase	51.549	775000	826000	801000
Fam3c	Q810F4	Protein FAM3C	24.713	1520000	61500	790000
Nubp2	Q68FS1	Cytosolic Fe-S cluster assembly factor NUBP2	28.926	1300000	276000	786000
Fads2	Q9Z122	Fatty acid desaturase 2	52.38	1380000	193000	786000
Hpcal1	P62749	Hippocalcin-like protein 1	22.338	900000	667000	783000
Pcnp	Q7TP40	PEST proteolytic signal-containing nuclear protein	20.195	976000	584000	780000
Lcmt1	Q6P4Z6	Leucine carboxyl methyltransferase 1	38.33	687000	867000	777000
Mras	P97538	Ras-related protein M-Ras	23.887	1090000	459000	776000
Txndc15	Q5BJT4	Thioredoxin domain-containing protein 15	37.927	1360000	188000	776000
Ei24	Q4KM77	Etoposide-induced protein 2.4 homolog	38.892	1030000	515000	772000
Alad	P06214	Delta-aminolevulinic acid dehydratase	36.031	1150000	382000	767000
Naa11	Q4V8K3	N-alpha-acetyltransferase 11	27.622	1480000	46100	763000
Top2a	P41516	DNA topoisomerase 2-alpha	173.22	1250000	276000	762000
Hdac1	Q4QQW4	Histone deacetylase 1	55.092	1110000	398000	755000
Glyr1	Q5RKH0	Putative oxidoreductase GLYR1	60.421	1380000	117000	749000
Hapln1	P03994	Hyaluronan and proteoglycan link protein 1	40.261	1370000	115000	745000
Aip	Q5FWY5	AH receptor-interacting protein	37.598	728000	756000	742000
Hrsp12	P52759	Ribonuclease UK114	14.303	1200000	281000	740000
Faf1	Q924K2	FAS-associated factor 1	73.744	1220000	256000	736000
Zfr	Q562A2	Zinc finger RNA-binding protein	116.82	1180000	280000	729000
Unc13a	Q62768	Protein unc-13 homolog A	196.35	929000	529000	729000
Slc44a2	B4F795	Choline transporter-like protein 2	79.896	1140000	315000	729000
Fahd1	Q6AYQ8	Acylpyruvase FAHD1, mitochondrial	24.48	1180000	257000	721000
Cst3	P14841	Cystatin-C	15.437	1100000	340000	719000
Bid	Q9JLT6	BH3-interacting domain death agonist	22.249	563000	875000	719000
Dhodh	Q63707	Dihydroorotate dehydrogenase (quinone), mitochondrial	42.662	1060000	375000	718000
B3gat1	O35789	Galactosylgalactosylxylosylprotein 3-beta-glucuronosyltransferase 1	38.237	1420000	14000	718000
Mrps26	Q9EPJ3	28S ribosomal protein S26, mitochondrial	23.349	1280000	154000	716000
Tm9sf4	Q4KLL4	Transmembrane 9 superfamily member 4	74.674	1250000	181000	713000
Hcn1	Q9JKB0	Potassium/sodium hyperpolarization-activated cyclic nucleotide-gated channel 1	102.42	800000	623000	712000
Dclk2	Q5MPA9	Serine/threonine-protein kinase DCLK2	84.015	709000	714000	711000
Acaca	P11497	Acetyl-CoA carboxylase 1	265.19	1030000	394000	711000
Mrpl41	Q5BJX1	39S ribosomal protein L41, mitochondrial	15.192	368000	1050000	708000
Slc39a9	Q3KR82	Zinc transporter ZIP9	30.176	1270000	148000	708000
Map2k2	P36506	Dual specificity mitogen-activated protein kinase kinase 2	44.281	523000	889000	706000
Fen1	Q5XIP6	Flap endonuclease 1	42.608	1090000	317000	706000
Eif2b2	Q62818	Translation initiation factor eIF-2B subunit beta	38.875	940000	470000	705000
Sec11c	Q9WTR7	Signal peptidase complex catalytic subunit SEC11C	21.646	1180000	223000	699000
Cr1l	Q63135	Complement component receptor 1-like protein	61.68	1050000	347000	696000
Exoc2	O54921	Exocyst complex component 2	104.03	967000	414000	691000
Cdc5l	O08837	Cell division cycle 5-like protein	92.216	1080000	294000	686000
Nup62	P17955	Nuclear pore glycoprotein p62	53.396	1160000	213000	686000
Synpr	P22831	Synaptoporin	29.107	927000	444000	685000
Txn2	P97615	Thioredoxin, mitochondrial	18.232	1130000	230000	682000
Ngef	Q5BKC9	Ephexin-1	81.007	1040000	309000	673000
Csnk1d	Q06486	Casein kinase I isoform delta	47.316	887000	446000	667000
Tpr	F1MA98	Nucleoprotein TPR	267.3	1010000	318000	663000
Stk24	B0LT89	Serine/threonine-protein kinase 24	47.989	1030000	290000	663000
Nrp2	O35276	Neuropilin-2	103.9	850000	474000	662000
Pdia4	P38659	Protein disulfide-isomerase A4	72.719	1070000	244000	659000
Rbmxrtl	P84586	RNA-binding motif protein, X chromosome retrogene-like	42.203	953000	363000	658000
Fgf12	P61150	Fibroblast growth factor 12	27.399	783000	531000	657000
Gsr	P70619	Glutathione reductase (Fragment)	46.301	801000	508000	655000
Psen1	P97887	Presenilin-1	52.789	929000	377000	653000
Hspa1a	Q07439	Heat shock 70 kDa protein 1A/1B	70.184	1180000	117000	646000
Exoc5	P97878	Exocyst complex component 5	81.736	802000	490000	646000
Bckdhb	P35738	2-oxoisovalerate dehydrogenase subunit beta, mitochondrial	42.823	815000	474000	645000
Abhd17b	Q6AY17	Alpha/beta hydrolase domain-containing protein 17B	32.2	858000	425000	641000
Sdf4	Q91ZS3	45 kDa calcium-binding protein	42.075	237000	1010000	624000
Ptpra	Q03348	Receptor-type tyrosine-protein phosphatase alpha	90.259	1140000	109000	624000
Ik	Q66HG8	Protein Red	65.587	843000	402000	623000
Yipf3	Q6TUD4	Protein YIPF3	37.973	1110000	129000	620000
Mogs	O88941	Mannosyl-oligosaccharide glucosidase	91.87	1110000	123000	619000
Fahd2	B2RYW9	Fumarylacetoacetate hydrolase domain-containing protein 2	34.581	662000	575000	619000
Trappc1	Q2KMM2	Trafficking protein particle complex subunit 1	16.881	935000	298000	617000
Pccb	P07633	Propionyl-CoA carboxylase beta chain, mitochondrial	58.626	1040000	183000	613000
Trappc2	D3ZVF4	Trafficking protein particle complex subunit 2	16.453	721000	499000	610000
Pigs	Q5XI31	GPI transamidase component PIG-S	61.724	1040000	183000	609000
Agps	Q9EQR2	Alkyldihydroxyacetonephosphate synthase, peroxisomal	71.587	952000	265000	608000
Cstf1	Q5BJQ6	Cleavage stimulation factor subunit 1	48.381	1100000	119000	607000
Dhrs7b	Q5RJY4	Dehydrogenase/reductase SDR family member 7B	35.342	1120000	96700	607000
Glrx2	Q6AXW1	Glutaredoxin-2, mitochondrial	17.275	1110000	101000	605000
Pmpcb	Q03346	Mitochondrial-processing peptidase subunit beta	54.265	1100000	113000	604000
Abcf1	Q6MG08	ATP-binding cassette sub-family F member 1	95.251	1160000	53000	604000
Plxna3	D3ZPX4	Plexin-A3	207.98	951000	256000	603000
Mrps25	Q4QR80	28S ribosomal protein S25, mitochondrial	19.775	1170000	37900	602000
Fam195b	B0BN72	Protein FAM195B	11.101	719000	481000	600000
Plscr3	Q6QBQ4	Phospholipid scramblase 3	31.646	658000	535000	596000
Ctnnbl1	Q4V8K2	Beta-catenin-like protein 1	64.947	745000	438000	592000
Pelp1	Q56B11	Proline-, glutamic acid- and leucine-rich protein 1	119.14	883000	297000	590000
Vps36	P0C0A2	Vacuolar protein-sorting-associated protein 36	43.717	739000	428000	584000
Hibadh	P29266	3-hydroxyisobutyrate dehydrogenase, mitochondrial	35.302	972000	195000	584000
Adam10	Q10743	Disintegrin and metalloproteinase domain-containing protein 10 (Fragment)	60.444	1040000	122000	582000
Srp54	Q6AYB5	Signal recognition particle 54 kDa protein	55.704	913000	250000	581000
Pelo	Q5XIP1	Protein pelota homolog	43.407	833000	328000	581000
Sort1	O54861	Sortilin	91.168	779000	381000	580000
Ggps1	Q6F596	Geranylgeranyl pyrophosphate synthase	34.777	404000	751000	577000
Acaa2	P13437	3-ketoacyl-CoA thiolase, mitochondrial	41.87	821000	315000	568000
Spryd7	Q5M7T2	SPRY domain-containing protein 7	21.681	993000	142000	567000
Slc9a3r2	Q920G2	Na(+)/H(+) exchange regulatory cofactor NHE-RF2	37.368	85700	1050000	567000
Tf	P12346	Serotransferrin	76.394	1090000	41300	567000
Ptprf	Q64604	Receptor-type tyrosine-protein phosphatase F	211.49	678000	444000	561000
Slc24a2	O54701	Sodium/potassium/calcium exchanger 2	74.656	717000	405000	561000
Ndufaf4	Q9NQR8	NADH dehydrogenase [ubiquinone] 1 alpha subcomplex assembly factor 4	20.158	930000	188000	559000
Parp1	P27008	Poly [ADP-ribose] polymerase 1	112.66	820000	287000	553000
Rab31	Q6GQP4	Ras-related protein Rab-31	21.368	796000	308000	552000
Stambp	Q8R424	STAM-binding protein	48.511	815000	289000	552000
Nup35	Q68FY1	Nucleoporin NUP53	34.801	799000	301000	550000
Syngap1	Q9QUH6	Ras/Rap GTPase-activating protein SynGAP	144.72	804000	294000	549000
Sel1l	Q80Z70	Protein sel-1 homolog 1	88.682	993000	104000	548000
Csdc2	Q63430	Cold shock domain-containing protein C2	16.877	778000	316000	547000
Slc30a1	Q62720	Zinc transporter 1	55.142	786000	300000	543000
Mrfap1	Q5M820	MORF4 family-associated protein 1	14.222	586000	494000	540000
Rtn4rl2	Q80WD1	Reticulon-4 receptor-like 2	46.183	300000	770000	535000
Rwdd4	Q569B7	RWD domain-containing protein 4	21.114	754000	313000	534000
Eif2b3	P70541	Translation initiation factor eIF-2B subunit gamma	50.435	979000	84200	532000
Ptpn1	P20417	Tyrosine-protein phosphatase non-receptor type 1	49.674	755000	308000	531000
Nudt9	Q5XIG0	ADP-ribose pyrophosphatase, mitochondrial	38.562	930000	130000	530000
Ccdc93	Q5BJT7	Coiled-coil domain-containing protein 93	72.635	997000	58800	528000
Nlgn3	Q62889	Neuroligin-3	93.887	1010000	47900	528000
Pc	P52873	Pyruvate carboxylase, mitochondrial	129.78	690000	363000	526000
Degs1	Q5XIF5	Sphingolipid delta(4)-desaturase DES1	38.055	784000	265000	525000
Mllt4	O35889	Afadin	207.68	731000	314000	523000
Acadsb	P70584	Short/branched chain specific acyl-CoA dehydrogenase, mitochondrial	47.823	849000	195000	522000
Mrpl14	Q7M0E7	39S ribosomal protein L14, mitochondrial	15.912	792000	245000	518000
Phactr1	P62024	Phosphatase and actin regulator 1	66.215	633000	402000	518000
Phf5a	P83871	PHD finger-like domain-containing protein 5A	12.405	444000	591000	517000
Nmral1	P86172	NmrA-like family domain-containing protein 1 (Fragments)	16.901	764000	264000	514000
Stau2	Q68SB1	Double-stranded RNA-binding protein Staufen homolog 2	62.681	852000	175000	513000
Cntnap1	P97846	Contactin-associated protein 1	155.87	714000	312000	513000
Pitpnb	P53812	Phosphatidylinositol transfer protein beta isoform	31.45	786000	239000	512000
Ssbp3	Q9R050	Single-stranded DNA-binding protein 3	37.714	883000	141000	512000
Asah1	Q6P7S1	Acid ceramidase	44.443	993000	28400	511000
Lman1	Q62902	Protein ERGIC-53	57.956	709000	303000	506000
Exoc3	Q62825	Exocyst complex component 3	86.496	578000	431000	504000
Arg2	O08701	Arginase-2, mitochondrial	38.64	845000	161000	503000
Triqk	Q5EB66	Triple QxxK/R motif-containing protein	9.6772	442000	563000	503000
Ankrd46	Q76K24	Ankyrin repeat domain-containing protein 46	25.18	852000	151000	501000
Ppfia4	Q91Z80	Liprin-alpha-4 (Fragment)	118.0	446000	557000	501000
Slc25a20	P97521	Mitochondrial carnitine/acylcarnitine carrier protein	33.154	738000	256000	497000
Pomgnt2	Q5NDF0	Protein O-linked-mannose beta-1,4-N-acetylglucosaminyltransferase 2	66.716	885000	107000	496000
Nit1	Q7TQ94	Nitrilase homolog 1	32.09	595000	396000	496000
Ddx21	Q3B8Q1	Nucleolar RNA helicase 2	85.965	862000	118000	490000
Gatm	P50442	Glycine amidinotransferase, mitochondrial	48.242	746000	234000	490000
Itgb1	P49134	Integrin beta-1	88.494	832000	144000	488000
Abhd6	Q5XI64	Monoacylglycerol lipase ABHD6	38.311	767000	208000	488000
Anp32b	Q9EST6	Acidic leucine-rich nuclear phosphoprotein 32 family member B	31.06	314000	655000	485000
Tmpo	Q62733	Lamina-associated polypeptide 2, isoform beta	50.277	697000	272000	484000
Plrg1	Q9WUC8	Pleiotropic regulator 1	57.188	517000	440000	479000
Thtpa	Q8CGV7	Thiamine-triphosphatase	24.543	761000	195000	478000
Nsg1	P02683	Neuron-specific protein family member 1	20.943	883000	71800	477000
Ecsit	Q5XIC2	Evolutionarily conserved signaling intermediate in Toll pathway, mitochondrial	49.619	722000	222000	472000
Impdh1	D3ZLZ7	Inosine-5-monophosphate dehydrogenase 1	55.292	749000	194000	472000
Bloc1s2	Q32WR5	Biogenesis of lysosome-related organelles complex-1 subunit 2	16.067	155000	784000	469000
Ppm1b	P35815	Protein phosphatase 1B	42.889	773000	165000	469000
Babam1	Q5XIJ6	BRISC and BRCA1-A complex member 1	36.878	633000	295000	464000
Ezr	P31977	Ezrin	69.39	613000	311000	462000
Fdxr	P56522	NADPH:adrenodoxin oxidoreductase, mitochondrial	54.362	765000	154000	460000
Pcyt1b	Q9QZC4	Choline-phosphate cytidylyltransferase B	41.9	546000	370000	458000
Kidins220	Q9EQG6	Kinase D-interacting substrate of 220 kDa	195.71	726000	187000	456000
Cbwd1	Q99MB4	COBW domain-containing protein 1	43.931	520000	389000	455000
Amz2	Q400C7	Archaemetzincin-2	41.379	552000	355000	454000
RragB	Q63487	Ras-related GTP-binding protein B	43.191	626000	281000	453000
Kalrn	P97924	Kalirin	336.58	556000	344000	450000
Fhit	Q9JIX3	Bis(5-adenosyl)-triphosphatase	17.348	604000	290000	447000
Nae1	Q9Z1A5	NEDD8-activating enzyme E1 regulatory subunit	60.382	727000	167000	447000
Ccdc22	P86182	Coiled-coil domain-containing protein 22	70.854	316000	576000	446000
Frrs1l	D3ZE85	DOMON domain-containing protein FRRS1L	32.456	540000	351000	446000
Eif2b1	Q64270	Translation initiation factor eIF-2B subunit alpha	33.678	463000	421000	442000
Hsd17b7	Q62904	3-keto-steroid reductase	37.372	761000	115000	438000
Pmpca	P20069	Mitochondrial-processing peptidase subunit alpha	58.607	663000	212000	437000
Ephb1	P09759	Ephrin type-B receptor 1	109.88	687000	187000	437000
Tmem43	Q5XIP9	Transmembrane protein 43	44.774	696000	173000	434000
Lrrc73	Q587K4	Leucine-rich repeat-containing protein 73	33.377	670000	196000	433000
Ssrp1	Q04931	FACT complex subunit SSRP1	80.914	710000	151000	431000
Anxa6	P48037	Annexin A6	75.753	568000	292000	430000
Sept8	B0BNF1	Septin-8	51.251	644000	215000	430000
Rab9a	Q99P75	Ras-related protein Rab-9A	22.895	591000	267000	429000
Dhx30	Q5BJS0	Putative ATP-dependent RNA helicase DHX30	134.0	795000	58900	427000
Aktip	Q5FVH4	AKT-interacting protein	32.991	837000	17100	427000
Nup210	P11654	Nuclear pore membrane glycoprotein 210	204.16	758000	95800	427000
Nfia	P09414	Nuclear factor 1 A-type	55.976	766000	87600	427000
Timm10b	Q9R1B1	Mitochondrial import inner membrane translocase subunit Tim10 B	11.351	577000	275000	426000
Morf4l1	Q6AYU1	Mortality factor 4-like protein 1	37.2	815000	25600	420000
Dnajc3	Q9R0T3	DnaJ homolog subfamily C member 3	57.56	791000	46000	419000
Tmem126a	Q5HZA9	Transmembrane protein 126A	21.657	675000	159000	417000
Dtnb	P84060	Dystrobrevin beta	73.877	15700	817000	416000
Sqle	P52020	Squalene monooxygenase	64.023	635000	194000	414000
Rasa1	P50904	Ras GTPase-activating protein 1	115.44	713000	114000	414000
Slc4a7	Q9R1N3	Sodium bicarbonate cotransporter 3	135.95	791000	33500	412000
Pcca	P14882	Propionyl-CoA carboxylase alpha chain, mitochondrial	81.622	806000	17700	412000
Them4	Q566R0	Acyl-coenzyme A thioesterase THEM4	26.089	462000	357000	409000
Lrfn4	D4ABX8	Leucine-rich repeat and fibronectin type-III domain-containing protein 4	67.258	549000	269000	409000
Clu	P05371	Clusterin	51.375	551000	264000	408000
Cpsf7	Q5XI29	Cleavage and polyadenylation specificity factor subunit 7	51.072	611000	197000	404000
Sigmar1	Q9R0C9	Sigma non-opioid intracellular receptor 1	25.27	497000	311000	404000
Uxs1	Q5PQX0	UDP-glucuronic acid decarboxylase 1	47.538	635000	171000	403000
Gak	P97874	Cyclin-G-associated kinase	143.7	610000	196000	403000
Smarca4	Q8K1P7	Transcription activator BRG1	181.43	736000	69100	403000
Mccc2	Q5XIT9	Methylcrotonoyl-CoA carboxylase beta chain, mitochondrial	61.516	641000	164000	402000
Sfr1	Q6TXG9	Swi5-dependent recombination DNA repair protein 1 homolog	28.729	503000	301000	402000
Spin1	Q4V8J7	Spindlin-1	29.628	577000	221000	399000
Tmed3	Q6AY25	Transmembrane emp24 domain-containing protein 3	25.51	751000	44900	398000
Nup93	Q66HC5	Nuclear pore complex protein Nup93	93.301	545000	249000	397000
Vcpip1	Q8CF97	Deubiquitinating protein VCIP135	134.56	602000	183000	393000
Clic1	Q6MG61	Chloride intracellular channel protein 1	26.98	657000	127000	392000
Micu1	Q6P6Q9	Calcium uptake protein 1, mitochondrial	54.194	658000	120000	389000
Camkk2	O88831	Calcium/calmodulin-dependent protein kinase kinase 2	64.446	266000	507000	387000
Mecr	Q9Z311	Trans-2-enoyl-CoA reductase, mitochondrial	40.326	554000	217000	386000
Arhgap44	F1LQX4	Rho GTPase-activating protein 44	89.114	498000	270000	384000
Tmem120a	Q5HZE2	Transmembrane protein 120A	40.657	288000	478000	383000
Txndc12	Q498E0	Thioredoxin domain-containing protein 12	19.018	508000	251000	379000
Lphn2	O88923	Latrophilin-2	166.73	644000	109000	377000
Acadvl	P45953	Very long-chain specific acyl-CoA dehydrogenase, mitochondrial	70.748	660000	92900	377000
Dnph1	O35820	2-deoxynucleoside 5-phosphate N-hydrolase 1	17.781	444000	307000	375000
Me1	P13697	NADP-dependent malic enzyme	64.002	442000	304000	373000
Aacs	Q9JMI1	Acetoacetyl-CoA synthetase	75.039	716000	27500	372000
Vcl	P85972	Vinculin	116.61	632000	111000	372000
Ptk2b	P70600	Protein-tyrosine kinase 2-beta	115.78	453000	287000	370000
Pcdha4	Q767I8	Protocadherin alpha-4	103.04	434000	306000	370000
Dhcr24	Q5BQE6	Delta(24)-sterol reductase	60.046	696000	42800	369000
Ostf1	Q6P686	Osteoclast-stimulating factor 1	23.668	405000	333000	369000
Ccdc51	Q5PPN7	Coiled-coil domain-containing protein 51	45.813	197000	541000	369000
Ppif	P29117	Peptidyl-prolyl cis-trans isomerase F, mitochondrial	21.81	584000	143000	364000
Mtnd1	P03889	NADH-ubiquinone oxidoreductase chain 1	36.177	341000	386000	364000
Wdr18	Q499N3	WD repeat-containing protein 18	47.225	694000	30600	362000
Nop16	Q1RP77	Nucleolar protein 16	21.117	597000	122000	360000
Prkci	F1M7Y5	Protein kinase C iota type	68.276	435000	282000	358000
Bag5	Q5QJC9	BAG family molecular chaperone regulator 5	51.03	568000	147000	357000
Lamp2	P17046	Lysosome-associated membrane glycoprotein 2	45.163	448000	264000	356000
Tsfm	Q9QYU2	Elongation factor Ts, mitochondrial	35.178	553000	158000	356000
Gss	P46413	Glutathione synthetase	52.344	630000	80600	355000
Gorasp1	O35254	Golgi reassembly-stacking protein 1	47.672	538000	160000	349000
Mtrf1l	Q4V7E5	Peptide chain release factor 1-like, mitochondrial	42.343	53000	644000	349000
Cyth2	P63035	Cytohesin-2	46.571	179000	518000	348000
Rundc3b	Q3B7K9	RUN domain-containing protein 3B	44.792	432000	262000	347000
Cbln1	P63182	Cerebellin-1	21.083	452000	241000	346000
Serpinh1	P29457	Serpin H1	46.517	641000	51100	346000
Rbm22	Q4V7D7	Pre-mRNA-splicing factor RBM22	46.863	514000	174000	344000
Clcn3	P51792	H(+)/Cl(-) exchange transporter 3	90.854	474000	212000	343000
Fyttd1	Q7TQ84	UAP56-interacting factor	35.642	453000	233000	343000
Abcb6	O70595	ATP-binding cassette sub-family B member 6, mitochondrial	93.304	605000	79000	342000
Ube2g1	P62255	Ubiquitin-conjugating enzyme E2 G1	19.509	467000	217000	342000
Ptk2	O35346	Focal adhesion kinase 1	119.72	408000	274000	341000
Cyp51a1	Q64654	Lanosterol 14-alpha demethylase	56.706	585000	92500	339000
Pik3r2	Q63788	Phosphatidylinositol 3-kinase regulatory subunit beta	81.328	668000	9700	339000
Mrpl10	P0C2C4	39S ribosomal protein L10, mitochondrial	29.94	509000	167000	338000
Rae1	Q3SWS8	mRNA export factor	40.919	652000	22400	337000
Gpr56	Q8K3V3	G-protein coupled receptor 56	77.251	563000	110000	336000
Naf1	Q52KK4	H/ACA ribonucleoprotein complex non-core subunit NAF1	49.763	497000	175000	336000
Ddx39a	Q5U216	ATP-dependent RNA helicase DDX39A	49.109	591000	74300	333000
Uqcc2	B5DFN3	Ubiquinol-cytochrome-c reductase complex assembly factor 2	16.33	490000	174000	332000
Prps2	P09330	Ribose-phosphate pyrophosphokinase 2	34.813	384000	278000	331000
Crat	Q704S8	Carnitine O-acetyltransferase	70.8	235000	424000	330000
Hdac4	Q99P99	Histone deacetylase 4	118.65	395000	265000	330000
Tmem206	Q66H28	Transmembrane protein 206	40.072	564000	95200	330000
Vps33a	Q63615	Vacuolar protein sorting-associated protein 33A	67.513	410000	249000	329000
Cdh8	O54800	Cadherin-8	88.332	444000	213000	328000
Adk	Q64640	Adenosine kinase	40.133	492000	165000	328000
Mrpl40	P83565	39S ribosomal protein L40, mitochondrial	24.397	539000	109000	324000
Cgref1	P97586	Cell growth regulator with EF hand domain protein 1	30.834	469000	179000	324000
Dak	Q4KLZ6	Bifunctional ATP-dependent dihydroxyacetone kinase/FAD-AMP lyase (cyclizing)	59.443	274000	374000	324000
Ttc19	D4A6D7	Tetratricopeptide repeat protein 19, mitochondrial	41.333	550000	97700	324000
Shoc2	Q6AYI5	Leucine-rich repeat protein SHOC-2	64.92	479000	168000	323000
Cyth1	P97694	Cytohesin-1	46.273	25100	619000	322000
Clcn4	P51794	H(+)/Cl(-) exchange transporter 4	83.7	606000	36100	321000
Os9	Q5RKH6	Protein OS-9	75.364	538000	99500	319000
Atg9a	Q5FWU3	Autophagy-related protein 9A	94.487	445000	191000	318000
Gfm1	Q07803	Elongation factor G, mitochondrial	83.456	561000	71400	316000
Clic4	Q9Z0W7	Chloride intracellular channel protein 4	28.633	531000	101000	316000
Txndc9	Q8K581	Thioredoxin domain-containing protein 9	26.272	435000	194000	315000
Ftsj3	Q5RJT2	pre-rRNA processing protein FTSJ3	94.766	94900	534000	314000
Cacna2d2	Q8CFG6	Voltage-dependent calcium channel subunit alpha-2/delta-2	130.77	423000	205000	314000
G6pc3	Q6AZ83	Glucose-6-phosphatase 3	38.833	108000	515000	312000
Sh3gl3	O35180	Endophilin-A3	39.166	415000	205000	310000
Gltpd1	Q5XIS2	Ceramide-1-phosphate transfer protein	24.522	482000	138000	310000
Cpd	Q9JHW1	Carboxypeptidase D	152.61	562000	49400	306000
Nubp1	Q5I0L4	Cytosolic Fe-S cluster assembly factor NUBP1	34.045	95300	514000	304000
Ppp2r2d	P56932	Serine/threonine-protein phosphatase 2A 55 kDa regulatory subunit B delta isoform	51.982	203000	405000	304000
Fam69b	Q5FVL3	Protein FAM69B	48.837	523000	79300	301000
B4galnt1	Q10468	Beta-1,4 N-acetylgalactosaminyltransferase 1	59.278	506000	94000	300000
Mta1	Q62599	Metastasis-associated protein MTA1	79.411	549000	50600	300000
Cc2d1a	Q66HA5	Coiled-coil and C2 domain-containing protein 1A	103.59	392000	205000	298000
Acox1	P07872	Peroxisomal acyl-coenzyme A oxidase 1	74.678	469000	127000	298000
Pgpep1	Q76IC5	Pyroglutamyl-peptidase 1	22.913	534000	60700	297000
Vangl2	P84889	Vang-like protein 2	59.77	488000	105000	297000
Cdk16	Q63686	Cyclin-dependent kinase 16	55.764	565000	24500	295000
Myh9	Q62812	Myosin-9	226.34	228000	358000	293000
Pdk1	Q63065	[Pyruvate dehydrogenase (acetyl-transferring)] kinase isozyme 1, mitochondrial	49.08	349000	236000	293000
Snf8	Q5RK19	Vacuolar-sorting protein SNF8	28.884	144000	439000	292000
Thoc6	Q6AY87	THO complex subunit 6 homolog	37.422	540000	42400	291000
Dpp7	Q9EPB1	Dipeptidyl peptidase 2	55.114	441000	139000	290000
Grk6	P97711	G protein-coupled receptor kinase 6	65.962	368000	209000	289000
Smc1a	Q9Z1M9	Structural maintenance of chromosomes protein 1A	143.2	524000	47400	286000
Ccbl2	Q58FK9	Kynurenine--oxoglutarate transaminase 3	51.044	534000	37200	286000
Sart1	Q5XIW8	U4/U6.U5 tri-snRNP-associated protein 1	91.01	422000	146000	284000
Tmem147	Q2TA63	Transmembrane protein 147	25.291	506000	59900	283000
Stx18	Q68FW4	Syntaxin-18	38.512	512000	53000	283000
Pdlim1	P52944	PDZ and LIM domain protein 1	35.584	284000	280000	282000
Ppig	O55035	Peptidyl-prolyl cis-trans isomerase G	88.378	462000	102000	282000
Cttnbp2	Q2IBD4	Cortactin-binding protein 2	178.77	341000	219000	280000
Lphn3	Q9Z173	Latrophilin-3	172.44	383000	174000	278000
Gtl3	Q499T7	UPF0468 protein C16orf80 homolog	19.132	363000	194000	278000
Tbrg4	Q5M9G9	Protein TBRG4	71.18	480000	74400	277000
Raver1	Q5XI28	Ribonucleoprotein PTB-binding 1	79.288	501000	51200	276000
Raf1	P11345	RAF proto-oncogene serine/threonine-protein kinase	72.927	236000	316000	276000
Naga	Q66H12	Alpha-N-acetylgalactosaminidase	46.871	493000	57300	275000
Gmpr	Q9Z244	GMP reductase 1	37.488	212000	338000	275000
Golga2	Q62839	Golgin subfamily A member 2	112.84	206000	344000	275000
Mrps10	Q7TQ82	28S ribosomal protein S10, mitochondrial	17.96	323000	223000	273000
Mrps31	B0BN56	28S ribosomal protein S31, mitochondrial	43.961	448000	95800	272000
Crabp1	P62966	Cellular retinoic acid-binding protein 1	15.591	208000	336000	272000
Enpp5	P84039	Ectonucleotide pyrophosphatase/phosphodiesterase family member 5	54.289	522000	18900	270000
Edc4	Q3ZAV8	Enhancer of mRNA-decapping protein 4	152.59	417000	124000	270000
Nup107	P52590	Nuclear pore complex protein Nup107	107.21	489000	47300	268000
Fnta	Q04631	Protein farnesyltransferase/geranylgeranyltransferase type-1 subunit alpha	44.049	266000	270000	268000
Fcho2	D3ZYR1	FCH domain only protein 2	88.711	379000	156000	268000
Hmgcl	P97519	Hydroxymethylglutaryl-CoA lyase, mitochondrial	34.191	414000	118000	266000
Adar	P55266	Double-stranded RNA-specific adenosine deaminase	129.91	477000	54200	266000
Pde4dip	Q9WUJ3	Myomegalin	262.04	324000	208000	266000
Eif5b	B2GUV7	Eukaryotic translation initiation factor 5B	137.68	522000	6830	264000
Rab3gap2	Q5U1Z0	Rab3 GTPase-activating protein non-catalytic subunit	154.43	345000	183000	264000
Fat3	Q8R508	Protocadherin Fat 3	502.08	381000	143000	262000
Celsr3	O88278	Cadherin EGF LAG seven-pass G-type receptor 3	359.35	128000	396000	262000
Atrn	Q99J86	Attractin	158.67	383000	140000	261000
Parg	Q9QYM2	Poly(ADP-ribose) glycohydrolase	109.0	54700	468000	261000
Gabra2	P23576	Gamma-aminobutyric acid receptor subunit alpha-2	51.181	408000	113000	261000
Gys1	A2RRU1	Glycogen [starch] synthase, muscle	84.071	282000	236000	259000
Cacna1c	P22002	Voltage-dependent L-type calcium channel subunit alpha-1C	243.48	3670	512000	258000
Nos1	P29476	Nitric oxide synthase, brain	160.56	267000	245000	256000
Tenm2	Q9R1K2	Teneurin-2	307.47	371000	141000	256000
Shc3	O70143	SHC-transforming protein 3	64.1	400000	111000	255000
Mllt11	Q5M971	Protein AF1q	10.03	259000	252000	255000
No66	D3ZU57	Bifunctional lysine-specific demethylase and histidyl-hydroxylase NO66	67.454	473000	36700	255000
Mrpl11	Q5XIE3	39S ribosomal protein L11, mitochondrial	22.42	484000	24000	254000
Gmppa	Q5XIC1	Mannose-1-phosphate guanyltransferase alpha	46.191	293000	215000	254000
Rcan2	Q8CH27	Calcipressin-2	21.991	415000	92500	254000
Kif1b	O88658	Kinesin-like protein KIF1B	204.17	329000	176000	253000
Ube2b	P63149	Ubiquitin-conjugating enzyme E2 B	17.312	195000	310000	253000
Pcdh8	D3ZE55	Protocadherin-8	113.19	387000	118000	253000
Cdh6	P55280	Cadherin-6	88.34	392000	113000	252000
Prpf4b	Q5RKH1	Serine/threonine-protein kinase PRP4 homolog	117.01	422000	78200	250000
Dnajc10	Q498R3	DnaJ homolog subfamily C member 10	90.746	457000	40700	249000
Hax1	Q7TSE9	HCLS1-associated protein X-1	31.448	366000	131000	248000
Capn5	Q8R4C0	Calpain-5	73.064	318000	179000	248000
Tmem55a	Q4V888	Type 2 phosphatidylinositol 4,5-bisphosphate 4-phosphatase	28.024	234000	262000	248000
Naa25	Q6QI44	N-alpha-acetyltransferase 25, NatB auxiliary subunit	111.26	475000	15800	246000
Ilk	Q99J82	Integrin-linked protein kinase	51.373	470000	14600	242000
Phgdh	O08651	D-3-phosphoglycerate dehydrogenase	56.493	430000	54200	242000
Cdc42bpa	O54874	Serine/threonine-protein kinase MRCK alpha	197.06	436000	47200	242000
Dohh	Q5PPJ4	Deoxyhypusine hydroxylase	33.076	429000	52000	241000
Mesdc2	Q5U2R7	LDLR chaperone MESD	25.215	386000	94600	240000
Memo1	Q4QQR9	Protein MEMO1	33.679	26100	451000	239000
Acy1a	Q6AYS7	Aminoacylase-1A	45.804	365000	105000	235000
Plbd2	Q4QQW8	Putative phospholipase B-like 2	65.455	347000	122000	235000
Csnk1g3	Q62763	Casein kinase I isoform gamma-3	51.428	199000	264000	231000
Fmr1	Q80WE1	Fragile X mental retardation protein 1 homolog	66.78	438000	24300	231000
Fbxo6	Q923V4	F-box only protein 6	32.786	193000	268000	231000
Gad1	P18088	Glutamate decarboxylase 1	66.64	319000	141000	230000
Tes	Q2LAP6	Testin	47.632	301000	157000	229000
Nlgn2	Q62888	Neuroligin-2	90.96	215000	243000	229000
Slc38a1	Q9JM15	Sodium-coupled neutral amino acid transporter 1	53.846	399000	56600	228000
Rem2	Q9WTY2	GTP-binding protein REM 2	37.274	389000	66400	228000
Ak3	P29411	GTP:AMP phosphotransferase AK3, mitochondrial	25.438	376000	78900	227000
Fbxo30	Q5XI67	F-box only protein 30	82.011	300000	155000	227000
Wbp11	Q5PQQ2	WW domain-binding protein 11	69.995	337000	116000	226000
Ero1l	Q8R4A1	ERO1-like protein alpha	54.018	280000	169000	225000
Nup155	P37199	Nuclear pore complex protein Nup155	155.0	324000	125000	224000
Slc25a25	Q8K3P6	Calcium-binding mitochondrial carrier protein SCaMC-2	52.694	327000	121000	224000
Scyl1	Q5M9F8	N-terminal kinase-like protein	89.125	260000	185000	222000
Rabac1	O35394	Prenylated Rab acceptor protein 1	20.643	230000	212000	221000
Caly	P58821	Neuron-specific vesicular protein calcyon	24.718	361000	80300	221000
Cntn6	P97528	Contactin-6	114.06	238000	202000	220000
Mrpl37	Q6AXT0	39S ribosomal protein L37, mitochondrial	48.365	414000	24000	219000
Wdr91	B2RYI0	WD repeat-containing protein 91	83.145	45200	390000	218000
Chn1	P30337	N-chimaerin	38.224	281000	154000	218000
Lnpep	P97629	Leucyl-cystinyl aminopeptidase	117.2	331000	101000	216000
Prpf6	A1A5S1	Pre-mRNA-processing factor 6	106.76	389000	39400	214000
Fxn	D3ZYW7	Frataxin, mitochondrial	23.066	289000	135000	212000
Tst	P24329	Thiosulfate sulfurtransferase	33.406	398000	25900	212000
Fip1l1	Q5U317	Pre-mRNA 3-end-processing factor FIP1	60.187	226000	192000	209000
Ncbp1	Q56A27	Nuclear cap-binding protein subunit 1	91.91	317000	100000	209000
Smc3	P97690	Structural maintenance of chromosomes protein 3	138.45	405000	10600	208000
Osgep	Q9WVS2	Probable tRNA N6-adenosine threonylcarbamoyltransferase	36.356	355000	59200	207000
Rrs1	A1A5P2	Ribosome biogenesis regulatory protein homolog	41.536	186000	229000	207000
Rasgrf1	P28818	Ras-specific guanine nucleotide-releasing factor 1	142.67	221000	192000	207000
Pde12	Q6AXQ5	2,5-phosphodiesterase 12	67.176	214000	198000	206000
Clpb	Q9WTT2	Caseinolytic peptidase B protein homolog	75.701	277000	135000	206000
Thrap3	Q5M7V8	Thyroid hormone receptor-associated protein 3	108.25	276000	135000	205000
Lrfn1	P0C7J6	Leucine-rich repeat and fibronectin type III domain-containing protein 1	81.969	214000	193000	203000
Mrps15	Q5XI37	28S ribosomal protein S15, mitochondrial	29.712	367000	37100	202000
Tfip11	Q5U2Y6	Tuftelin-interacting protein 11	96.151	213000	188000	201000
Prkab1	P80386	5-AMP-activated protein kinase subunit beta-1	30.394	346000	49200	197000
Nup85	Q4QQS8	Nuclear pore complex protein Nup85	74.881	274000	121000	197000
Lamb2	P15800	Laminin subunit beta-2	196.47	176000	218000	197000
Tomm40l	A4F267	Mitochondrial import receptor subunit TOM40B	34.048	320000	70800	195000
Abhd5	Q6QA69	1-acylglycerol-3-phosphate O-acyltransferase ABHD5	39.103	249000	141000	195000
Ubtf	P25977	Nucleolar transcription factor 1	89.436	366000	24200	195000
Ankh	P58366	Progressive ankylosis protein homolog	54.264	356000	31700	194000
Coq7	Q63619	Ubiquinone biosynthesis protein COQ7 homolog (Fragment)	20.14	357000	29500	193000
Grn	P23785	Granulins	63.369	318000	64500	191000
Sgpl1	Q8CHN6	Sphingosine-1-phosphate lyase 1	63.758	234000	148000	191000
Mrpl30	P0C2C1	39S ribosomal protein L30, mitochondrial	18.411	345000	35700	191000
Mpped2	B1WBP0	Metallophosphoesterase MPPED2	33.335	109000	272000	190000
Cdc37l1	Q5XIC3	Hsp90 co-chaperone Cdc37-like 1	38.315	292000	86700	190000
Anxa1	P07150	Annexin A1	38.829	335000	43900	189000
Nt5c3b	Q6AYP7	7-methylguanosine phosphate-specific 5-nucleotidase	34.535	305000	68700	187000
Rbm45	Q8CFD1	RNA-binding protein 45	53.431	345000	28700	187000
Nptx1	P47971	Neuronal pentraxin-1	47.216	170000	203000	186000
Arfgef2	Q7TSU1	Brefeldin A-inhibited guanine nucleotide-exchange protein 2	201.97	311000	60200	185000
Rnf123	D3ZXK7	E3 ubiquitin-protein ligase RNF123	149.08	264000	107000	185000
Dab2ip	Q6P730	Disabled homolog 2-interacting protein	110.0	262000	107000	184000
Polr2e	B0BNE2	DNA-directed RNA polymerases I, II, and III subunit RPABC1	24.57	318000	50200	184000
Bnip1	Q8VHI8	Vesicle transport protein SEC20	26.17	306000	62300	184000
Nenf	Q6IUR5	Neudesin	18.991	357000	10200	184000
Ccdc104	Q4V8E4	Coiled-coil domain-containing protein 104	39.59	270000	96000	183000
Ttc5	Q5BK48	Tetratricopeptide repeat protein 5	48.793	187000	176000	182000
Mrpl38	Q5PQN9	39S ribosomal protein L38, mitochondrial	44.837	231000	133000	182000
Aldh4a1	P0C2X9	Delta-1-pyrroline-5-carboxylate dehydrogenase, mitochondrial	61.868	238000	125000	182000
Nifk	Q5RJM0	MKI67 FHA domain-interacting nucleolar phosphoprotein	31.351	222000	140000	181000
Nadk2	Q1HCL7	NAD kinase 2, mitochondrial	48.116	257000	101000	179000
Efnb1	P52796	Ephrin-B1	37.951	223000	134000	179000
Gprasp1	Q920R4	G-protein coupled receptor-associated sorting protein 1	151.35	333000	22800	178000
Bdnf	P23363	Brain-derived neurotrophic factor	28.109	316000	37700	177000
Znf385d	Q6AXX3	Zinc finger protein 385D	42.479	315000	34800	175000
Gclc	P19468	Glutamate--cysteine ligase catalytic subunit	72.618	291000	59200	175000
Faah	P97612	Fatty-acid amide hydrolase 1	63.356	263000	85500	174000
Anapc5	A1L1K3	Anaphase-promoting complex subunit 5	81.738	329000	14700	172000
Cpt1c	F1LN46	Carnitine O-palmitoyltransferase 1, brain isoform	90.169	199000	144000	171000
Tfam	Q91ZW1	Transcription factor A, mitochondrial	28.186	220000	122000	171000
Mgll	Q8R431	Monoglyceride lipase	33.499	247000	94100	171000
Irf2bpl	Q5EIC4	Interferon regulatory factor 2-binding protein-like	81.495	179000	161000	170000
Pik3r1	Q63787	Phosphatidylinositol 3-kinase regulatory subunit alpha	83.53	161000	177000	169000
Nts	P20068	Neurotensin/neuromedin N	19.563	194000	144000	169000
Rmdn1	Q4G069	Regulator of microtubule dynamics protein 1	35.4	256000	77000	167000
Fam134a	Q3MHU5	Protein FAM134A	57.658	274000	58400	166000
Tspan13	Q5FVL6	Tetraspanin-13	22.259	287000	44100	165000
Bud31	O70454	Protein BUD31 homolog	17.0	303000	26800	165000
Nup54	P70582	Nuclear pore complex protein Nup54	55.744	286000	42300	164000
D2hgdh	P84850	D-2-hydroxyglutarate dehydrogenase, mitochondrial	58.804	201000	125000	163000
Slc25a42	P0C546	Mitochondrial coenzyme A transporter SLC25A42	35.099	300000	24600	162000
Ormdl3	Q6QI25	ORM1-like protein 3	17.462	213000	111000	162000
Lpcat3	Q5FVN0	Lysophospholipid acyltransferase 5	56.017	182000	141000	162000
Ciao1	Q5M7T1	Probable cytosolic iron-sulfur protein assembly protein CIAO1	37.617	97600	225000	161000
Ppp1r9a	O35867	Neurabin-1	122.73	127000	194000	161000
Brinp1	Q925T8	BMP/retinoic acid-inducible neural-specific protein 1	88.653	124000	195000	160000
Arhgef11	Q9ES67	Rho guanine nucleotide exchange factor 11	168.53	299000	20200	160000
Gdap2	Q66H63	Ganglioside-induced differentiation-associated-protein 2	56.13	198000	119000	159000
Adck4	Q6AY19	AarF domain-containing protein kinase 4	58.904	287000	30700	159000
Bckdha	P11960	2-oxoisovalerate dehydrogenase subunit alpha, mitochondrial (Fragment)	50.164	271000	45800	158000
Lbr	O08984	Lamin-B receptor	70.723	266000	49700	158000
Cyth3	P97696	Cytohesin-3	46.336	87600	226000	157000
Ddx46	Q62780	Probable ATP-dependent RNA helicase DDX46	117.38	282000	29100	155000
Pdcl3	Q4KLJ8	Phosducin-like protein 3	27.699	248000	62300	155000
Cntn4	Q62845	Contactin-4	113.39	188000	121000	155000
Gclm	P48508	Glutamate--cysteine ligase regulatory subunit	30.548	217000	91900	154000
Nanp	Q5M969	N-acylneuraminate-9-phosphatase	27.741	202000	105000	154000
Zbtb18	Q9JKY3	Zinc finger and BTB domain-containing protein 18	58.31	289000	16800	153000
Cfdp1	Q75UQ2	Craniofacial development protein 1	32.969	165000	133000	149000
Urod	P32362	Uroporphyrinogen decarboxylase (Fragment)	40.452	196000	102000	149000
Gabra5	P19969	Gamma-aminobutyric acid receptor subunit alpha-5	52.337	123000	174000	149000
Lmbrd1	Q6AZ61	Probable lysosomal cobalamin transporter	61.018	91200	206000	149000
Ccs	Q9JK72	Copper chaperone for superoxide dismutase	28.889	161000	136000	148000
Akap8	Q63014	A-kinase anchor protein 8	76.161	262000	33600	148000
Ago2	Q9QZ81	Protein argonaute-2	97.317	167000	125000	146000
Mdga2	P60756	MAM domain-containing glycosylphosphatidylinositol anchor protein 2	106.72	204000	87800	146000
Nampt	Q80Z29	Nicotinamide phosphoribosyltransferase	55.437	120000	167000	144000
Mrpl46	Q5RK00	39S ribosomal protein L46, mitochondrial	31.673	248000	37800	143000
Dph2	Q568Y2	Diphthamide biosynthesis protein 2	52.324	205000	79400	142000
Xkr7	Q5GH56	XK-related protein 7	64.337	197000	87000	142000
Chm	P37727	Rab proteins geranylgeranyltransferase component A 1	72.48	255000	29400	142000
Hmbs	P19356	Porphobilinogen deaminase	39.361	261000	22700	142000
Fuca1	P17164	Tissue alpha-L-fucosidase	53.486	231000	52600	142000
Golph3	Q9ERE4	Golgi phosphoprotein 3	33.779	229000	52200	141000
Isca1	Q80W96	Iron-sulfur cluster assembly 1 homolog, mitochondrial	14.149	234000	47200	141000
Acot2	O55171	Acyl-coenzyme A thioesterase 2, mitochondrial	49.701	263000	17300	140000
Slc8a3	P70549	Sodium/calcium exchanger 3	103.16	137000	142000	139000
Hcn2	Q9JKA9	Potassium/sodium hyperpolarization-activated cyclic nucleotide-gated channel 2	94.919	168000	111000	139000
Map3k7	P0C8E4	Mitogen-activated protein kinase kinase kinase 7	67.199	195000	83400	139000
Sord	P27867	Sorbitol dehydrogenase	38.234	135000	142000	138000
Ylpm1	P0CB49	YLP motif-containing protein 1	154.27	176000	99700	138000
Armcx3	Q5XID7	Armadillo repeat-containing X-linked protein 3	42.552	219000	52100	136000
Mrpl24	Q66H47	39S ribosomal protein L24, mitochondrial	25.0	137000	132000	135000
Hibch	Q5XIE6	3-hydroxyisobutyryl-CoA hydrolase, mitochondrial	43.024	231000	35200	133000
Xpnpep3	B5DEQ3	Probable Xaa-Pro aminopeptidase 3	56.454	106000	160000	133000
Adcy8	P40146	Adenylate cyclase type 8	139.82	108000	156000	132000
Neto2	C6K2K4	Neuropilin and tolloid-like protein 2	59.341	214000	49500	132000
Sidt1	Q6Q3F5	SID1 transmembrane family member 1	94.144	199000	64300	132000
Bod1	Q6AYJ2	Biorientation of chromosomes in cell division protein 1	18.351	149000	113000	131000
Matk	P41243	Megakaryocyte-associated tyrosine-protein kinase	51.896	115000	146000	131000
Ttc39b	D3ZC96	Tetratricopeptide repeat protein 39B	70.167	141000	120000	130000
Pdp2	O88484	[Pyruvate dehydrogenase [acetyl-transferring]]-phosphatase 2, mitochondrial	59.654	20300	239000	130000
Adnp	Q9JKL8	Activity-dependent neuroprotector homeobox protein	91.334	222000	36300	129000
Snrk	Q63553	SNF-related serine/threonine-protein kinase	81.627	217000	41500	129000
Gorab	B1H222	RAB6-interacting golgin	41.631	5800	252000	129000
Prkcz	P09217	Protein kinase C zeta type	67.732	168000	89300	129000
Mccc1	Q5I0C3	Methylcrotonoyl-CoA carboxylase subunit alpha, mitochondrial	79.329	198000	59800	129000
Ctsl	P07154	Cathepsin L1	37.66	166000	91200	129000
Hdgfrp2	Q925G1	Hepatoma-derived growth factor-related protein 2	74.017	145000	111000	128000
Ttc39c	Q0VGK2	Tetratricopeptide repeat protein 39C	58.977	246000	10100	128000
Mcam	Q9EPF2	Cell surface glycoprotein MUC18	71.326	99000	156000	127000
Rps6ka1	Q63531	Ribosomal protein S6 kinase alpha-1	82.882	194000	60600	127000
Fer	P09760	Tyrosine-protein kinase Fer	94.313	31300	221000	126000
Herc4	Q5PQN1	Probable E3 ubiquitin-protein ligase HERC4	118.54	196000	56500	126000
Gstk1	P24473	Glutathione S-transferase kappa 1	25.493	99100	150000	125000
Trmt10c	Q5U2R4	Mitochondrial ribonuclease P protein 1	48.292	103000	145000	124000
Sidt2	D3ZEH5	SID1 transmembrane family member 2	94.526	178000	68300	123000
Syt6	Q62746	Synaptotagmin-6	57.178	223000	22100	123000
P4ha1	P54001	Prolyl 4-hydroxylase subunit alpha-1	60.897	240000	5390	123000
Fbxl15	D4ABB4	F-box/LRR-repeat protein 15	33.179	119000	126000	122000
Fads1	Q920R3	Fatty acid desaturase 1	52.481	184000	58800	121000
Ptp4a2	Q6P9X4	Protein tyrosine phosphatase type IVA 2	19.127	179000	63400	121000
Doc2a	P70611	Double C2-like domain-containing protein alpha	44.589	120000	122000	121000
Terf2ip	Q5EAN7	Telomeric repeat-binding factor 2-interacting protein 1	43.418	169000	70300	120000
Syt4	P50232	Synaptotagmin-4	47.684	224000	15300	120000
Aldh1l1	P28037	Cytosolic 10-formyltetrahydrofolate dehydrogenase	98.873	102000	137000	119000
Lrrc8a	Q4V8I7	Leucine-rich repeat-containing protein 8A	94.161	120000	119000	119000
Ppp1r10	O55000	Serine/threonine-protein phosphatase 1 regulatory subunit 10	92.827	235000	2240	119000
Cnnm2	Q5U2P1	Metal transporter CNNM2	96.608	200000	37300	119000
Ermp1	Q6UPR8	Endoplasmic reticulum metallopeptidase 1	99.896	33700	203000	118000
Suox	Q07116	Sulfite oxidase, mitochondrial	60.805	158000	78600	118000
Lrrc4b	P0CC10	Leucine-rich repeat-containing protein 4B	76.118	180000	54500	117000
Cntn5	P97527	Contactin-5	120.6	172000	62200	117000
Pes1	Q3B8N8	Pescadillo homolog	67.603	186000	47700	117000
Aagab	Q9R0Z7	Alpha- and gamma-adaptin-binding protein p34	34.363	193000	39100	116000
Yme1l1	Q925S8	ATP-dependent zinc metalloprotease YME1L1	79.866	188000	43800	116000
Pdp1	O88483	[Pyruvate dehydrogenase [acetyl-transferring]]-phosphatase 1, mitochondrial	61.207	177000	54800	116000
Dym	B4F766	Dymeclin	76.49	150000	80000	115000
Cdkn2aip	Q5U2X0	CDKN2A-interacting protein	60.743	213000	16400	115000
Stx5	Q08851	Syntaxin-5	39.75	148000	81600	115000
Ptpn5	P35234	Tyrosine-protein phosphatase non-receptor type 5	42.366	154000	74800	114000
Gria1	P19490	Glutamate receptor 1	101.58	191000	36400	114000
Atl3	Q0ZHH6	Atlastin-3	60.585	207000	18800	113000
Mrpl3	P18665	39S ribosomal protein L3, mitochondrial	38.252	198000	26900	113000
Wdr5	Q498M4	WD repeat-containing protein 5	36.588	188000	36900	113000
Ech1	Q62651	Delta(3,5)-Delta(2,4)-dienoyl-CoA isomerase, mitochondrial	36.171	209000	12700	111000
Inpp5j	Q9JMC1	Phosphatidylinositol 4,5-bisphosphate 5-phosphatase A	107.21	196000	25400	111000
Klhl22	D3ZZC3	Kelch-like protein 22	71.773	113000	109000	111000
Clcn7	P51799	H(+)/Cl(-) exchange transporter 7	88.73	195000	25300	110000
Phax	Q63068	Phosphorylated adapter RNA export protein	43.166	174000	45400	110000
Ndufaf7	Q5XI79	NADH dehydrogenase [ubiquinone] complex I, assembly factor 7	48.715	120000	99800	110000
B3galnt1	Q6AY39	UDP-GalNAc:beta-1,3-N-acetylgalactosaminyltransferase 1	39.214	214000	4820	109000
Zc3h14	Q7TMD5	Zinc finger CCCH domain-containing protein 14	82.631	137000	80300	108000
Naa35	Q6DKG0	N-alpha-acetyltransferase 35, NatC auxiliary subunit	83.209	164000	52500	108000
Magee1	A1A5P9	Melanoma-associated antigen E1	102.18	178000	36400	107000
Nfs1	Q99P39	Cysteine desulfurase, mitochondrial	50.012	183000	31200	107000
Gtf2i	Q5U2Y1	General transcription factor II-I	110.21	129000	82700	106000
Aasdhppt	B2RYJ4	L-aminoadipate-semialdehyde dehydrogenase-phosphopantetheinyl transferase	35.816	113000	96600	105000
Dcun1d3	Q4V8B2	DCN1-like protein 3	34.35	77900	128000	103000
Bcam	Q9ESS6	Basal cell adhesion molecule	67.511	142000	63500	103000
Tubg1	P83888	Tubulin gamma-1 chain	51.1	190000	14800	103000
Ybx3	Q62764	Y-box-binding protein 3	38.851	151000	53000	102000
Zw10	Q4V8C2	Centromere/kinetochore protein zw10 homolog	87.966	191000	12600	102000
Ccdc50	Q810U0	Coiled-coil domain-containing protein 50	35.158	66900	136000	102000
Slit3	O88280	Slit homolog 3 protein	167.77	198000	3790	101000
Slc12a9	Q66HR0	Solute carrier family 12 member 9	96.003	192000	7280	99800
Wash1	B2RYF7	WAS protein family homolog 1	51.326	107000	90400	98500
Hspa14	Q6AYB4	Heat shock 70 kDa protein 14	54.462	123000	73800	98400
Gnl3	Q811S9	Guanine nucleotide-binding protein-like 3	60.66	161000	35100	98100
Cdk5rap3	Q9JLH7	CDK5 regulatory subunit-associated protein 3	57.044	165000	31200	98000
Pard6a	Q6B4M5	Partitioning defective 6 homolog alpha	37.398	129000	65000	97000
Ublcp1	Q5FWT7	Ubiquitin-like domain-containing CTD phosphatase 1	36.866	167000	26500	96900
Hexa	Q641X3	Beta-hexosaminidase subunit alpha	60.537	57200	136000	96800
Rbm4b	Q64LC9	RNA-binding protein 4B	39.991	158000	33800	95900
Far1	Q66H50	Fatty acyl-CoA reductase 1	59.267	178000	12900	95500
Gfap	P47819	Glial fibrillary acidic protein	49.957	60800	129000	94800
Fgd4	O88387	FYVE, RhoGEF and PH domain-containing protein 4	86.453	114000	74600	94400
Taco1	B2RYT9	Translational activator of cytochrome c oxidase 1	32.754	146000	42000	94200
Clmp	Q8K1G0	CXADR-like membrane protein	41.148	124000	63200	93700
Larp7	Q5XI01	La-related protein 7	64.949	163000	23600	93500
Llgl1	Q8K4K5	Lethal(2) giant larvae protein homolog 1	112.49	136000	50600	93200
Slc35e1	P0C6B1	Solute carrier family 35 member E1	44.384	170000	15500	92900
Zc3h15	Q6U6G5	Zinc finger CCCH domain-containing protein 15	48.299	165000	20900	92900
Thoc5	Q68FX7	THO complex subunit 5 homolog	78.659	173000	12200	92600
Elac2	Q8CGS5	Zinc phosphodiesterase ELAC protein 2	92.339	106000	78700	92300
Smndc1	Q4QQU6	Survival of motor neuron-related-splicing factor 30	26.783	152000	32900	92200
Sh3kbp1	Q925Q9	SH3 domain-containing kinase-binding protein 1	78.085	145000	39400	92200
Ube4a	Q6P7A2	Ubiquitin conjugation factor E4 A	122.38	143000	39800	91300
Gnpat	Q9ES71	Dihydroxyacetone phosphate acyltransferase	77.075	151000	29000	89900
Ddx25	Q9QY16	ATP-dependent RNA helicase DDX25	54.79	147000	32100	89700
Dyrk1a	Q63470	Dual specificity tyrosine-phosphorylation-regulated kinase 1A	85.54	131000	46800	88900
Chtf8	B2RYL1	Chromosome transmission fidelity protein 8 homolog isoform 2	52.095	155000	20300	87900
Abcc1	Q8CG09	Multidrug resistance-associated protein 1	171.49	171000	2250	86600
Pnoc	Q62923	Prepronociceptin	20.478	155000	18100	86300
Pfkfb4	P25114	6-phosphofructo-2-kinase/fructose-2,6-bisphosphatase 4	54.154	133000	38800	85700
Polb	P06766	DNA polymerase beta	38.326	135000	36300	85500
Hmgcr	P51639	3-hydroxy-3-methylglutaryl-coenzyme A reductase	96.687	134000	36200	84900
Ccrn4l	Q9ET55	Nocturnin	48.121	115000	54900	84800
Lppr2	Q6W5G4	Lipid phosphate phosphatase-related protein type 2	36.935	115000	52500	84000
Gpcpd1	Q80VJ4	Glycerophosphocholine phosphodiesterase GPCPD1	76.268	54900	112000	83400
Szrd1	Q5XIA2	SUZ domain-containing protein 1	16.998	88200	78000	83100
Ankrd34a	Q5BJT1	Ankyrin repeat domain-containing protein 34A	52.456	26300	137000	81400
Snx17	Q6AYS6	Sorting nexin-17	52.882	101000	60500	80500
Atp9b	D4ABB8	Probable phospholipid-transporting ATPase IIB	129.18	50800	110000	80100
Cog7	Q3T1G7	Conserved oligomeric Golgi complex subunit 7	86.211	114000	43600	78600
Nudt4	Q99MY2	Diphosphoinositol polyphosphate phosphohydrolase 2	20.138	56600	99300	77900
Cyp4x1	Q8K4D6	Cytochrome P450 4X1	58.573	98700	55000	76900
Lrrfip2	Q4V7E8	Leucine-rich repeat flightless-interacting protein 2	49.772	115000	38100	76700
Abcf3	Q66H39	ATP-binding cassette sub-family F member 3	79.855	144000	9670	76600
Abcb8	Q5RKI8	ATP-binding cassette sub-family B member 8, mitochondrial	77.77	112000	41300	76600
Hn1l	Q5BK20	Hematological and neurological expressed 1-like protein	20.07	120000	31500	75800
Arhgef2	Q5FVC2	Rho guanine nucleotide exchange factor 2	111.91	93500	57200	75400
Tprkb	Q5PQR8	EKC/KEOPS complex subunit Tprkb	17.593	117000	32800	75000
Recql	Q6AYJ1	ATP-dependent DNA helicase Q1	69.641	134000	14400	74000
Ascc3	F1LPQ2	Activating signal cointegrator 1 complex subunit 3	250.22	142000	5240	73600
Cntn3	Q62682	Contactin-3	112.79	44200	103000	73400
Slmap	P0C219	Sarcolemmal membrane-associated protein	98.223	110000	36000	72900
Eci2	Q5XIC0	Enoyl-CoA delta isomerase 2, mitochondrial	43.021	119000	23000	71200
Dcbld2	Q91ZV2	Discoidin, CUB and LCCL domain-containing protein 2	83.914	23100	119000	70900
Crnkl1	P63155	Crooked neck-like protein 1	83.415	134000	6670	70200
Cdk9	Q641Z4	Cyclin-dependent kinase 9	42.761	102000	37600	70000
Kif3c	O55165	Kinesin-like protein KIF3C	89.815	44000	95900	69900
Ppp4r1	Q8VI02	Serine/threonine-protein phosphatase 4 regulatory subunit 1	105.61	87000	52300	69600
Mapkap1	Q6AYF1	Target of rapamycin complex 2 subunit MAPKAP1	59.042	101000	35600	68400
Lgmn	Q9R0J8	Legumain	49.466	124000	12600	68200
Nsmf	Q9EPI6	NMDA receptor synaptonuclear signaling and neuronal migration factor	60.282	79000	56300	67600
Jakmip1	Q3SWS9	Janus kinase and microtubule-interacting protein 1	73.106	39100	96100	67600
Rabep2	Q62835	Rab GTPase-binding effector protein 2	61.972	74400	60600	67500
Acap2	Q5FVC7	Arf-GAP with coiled-coil, ANK repeat and PH domain-containing protein 2	87.229	78000	56500	67300
Rbm5	B2GV05	RNA-binding protein 5	92.351	118000	16000	66800
Maea	Q5RKJ1	Macrophage erythroblast attacher	45.336	60600	72900	66700
Necab1	Q9ESB5	N-terminal EF-hand calcium-binding protein 1	40.903	85500	47900	66700
Tmem126b	B2RZD2	Complex I assembly factor TMEM126B, mitochondrial	25.213	125000	8230	66700
Ptdss2	B2GV22	Phosphatidylserine synthase 2	54.722	107000	25800	66300
Gnal	P38406	Guanine nucleotide-binding protein G(olf) subunit alpha	44.248	60000	68400	64200
Myo1c	Q63355	Unconventional myosin-Ic	119.81	88400	39600	64000
Fut8	Q6EV76	Alpha-(1,6)-fucosyltransferase	66.484	93500	34000	63700
Pds5b	Q6TRW4	Sister chromatid cohesion protein PDS5 homolog B	164.46	94400	32100	63300
Ptpre	B2GV87	Receptor-type tyrosine-protein phosphatase epsilon	80.733	121000	5950	63200
Ireb2	Q62751	Iron-responsive element-binding protein 2	104.8	88600	37800	63200
Them6	Q5XIE1	Protein THEM6	23.747	80200	46100	63200
Mcf2l	Q63406	Guanine nucleotide exchange factor DBS	129.41	115000	10700	63000
Rims4	Q8CIX1	Regulating synaptic membrane exocytosis protein 4	29.271	41600	84100	62800
Cryl1	Q811X6	Lambda-crystallin homolog	35.341	70700	54100	62400
Rnf40	Q8CJB9	E3 ubiquitin-protein ligase BRE1B	113.84	91700	32900	62300
Plec	P30427	Plectin	533.53	120000	2950	61400
Unc119	Q62885	Protein unc-119 homolog A	27.048	113000	9170	61100
Tpmt	Q9Z0T0	Thiopurine S-methyltransferase	27.691	63800	58300	61000
Rbm10	P70501	RNA-binding protein 10	94.387	85000	36900	60900
Kti12	Q5I0L7	Protein KTI12 homolog	38.357	84600	36800	60700
Gfpt1	P82808	Glutamine--fructose-6-phosphate aminotransferase [isomerizing] 1	76.826	99800	21500	60700
Cdc73	Q4V8C8	Parafibromin	60.602	114000	6870	60600
Mdga1	P85171	MAM domain-containing glycosylphosphatidylinositol anchor protein 1	105.98	95300	25200	60300
Ufl1	B2GV24	E3 UFM1-protein ligase 1	89.584	108000	11900	60100
Unc13b	Q62769	Protein unc-13 homolog B	184.06	49400	70800	60100
Prkag1	P80385	5-AMP-activated protein kinase subunit gamma-1	37.386	98600	21100	59800
Phldb1	Q63312	Pleckstrin homology-like domain family B member 1 (Fragment)	93.54	61500	56300	58900
Macrod1	Q8K4G6	O-acetyl-ADP-ribose deacetylase MACROD1 (Fragment)	28.643	98400	19000	58700
Coro7	O35828	Coronin-7 (Fragment)	48.902	70500	46300	58400
Fam21	Q80X08	WASH complex subunit FAM21	145.15	97200	19300	58200
Zc3h18	Q6TQE1	Zinc finger CCCH domain-containing protein 18	105.54	34500	78600	56600
Pcna	P04961	Proliferating cell nuclear antigen	28.748	81300	31700	56500
Dgkz	O08560	Diacylglycerol kinase zeta	104.01	82100	30400	56200
Zfyve27	Q6P7B7	Protrudin	44.947	77000	34500	55700
Ilkap	Q9Z1Z6	Integrin-linked kinase-associated serine/threonine phosphatase 2C	42.744	95800	15500	55700
Smg9	Q5PQS6	Protein SMG9	57.632	23200	87400	55300
Ccdc91	Q6AY97	Coiled-coil domain-containing protein 91	50.165	105000	5370	55300
Gsn	Q68FP1	Gelsolin	86.067	40700	66200	53400
Syt12	P97610	Synaptotagmin-12	46.607	50300	56400	53400
Cdk17	O35831	Cyclin-dependent kinase 17	59.431	11200	93000	52100
Spryd4	Q4FZT8	SPRY domain-containing protein 4	23.249	83600	20000	51800
Scaf8	Q63623	Protein SCAF8	139.5	80100	23300	51700
Traf6	B5DF45	TNF receptor-associated factor 6	60.253	11400	91900	51600
Ubxn2b	P0C627	UBX domain-containing protein 2B	37.075	81400	21800	51600
Tmod1	P70567	Tropomodulin-1	40.48	80700	22200	51400
Ppp1r3e	P0C7L8	Protein phosphatase 1 regulatory subunit 3E	30.623	82100	20300	51200
Minpp1	O35217	Multiple inositol polyphosphate phosphatase 1	54.589	78900	23500	51200
Gramd1a	Q3KR56	GRAM domain-containing protein 1A	80.683	91200	11200	51200
Iqsec3	Q76M68	IQ motif and SEC7 domain-containing protein 3	129.02	58200	43500	50800
Asphd2	Q5HZW3	Aspartate beta-hydroxylase domain-containing protein 2	38.727	93300	8150	50700
Rpap1	Q3T1I9	RNA polymerase II-associated protein 1	154.76	91500	9700	50600
Akap5	P24587	A-kinase anchor protein 5	75.961	61900	37800	49800
Klc4	Q5PQM2	Kinesin light chain 4	68.963	68300	31000	49600
Nxf1	O88984	Nuclear RNA export factor 1	70.361	73800	25200	49500
Smug1	Q811Q1	Single-strand selective monofunctional uracil-DNA glycosylase	30.562	21300	77600	49400
Epha7	P54759	Ephrin type-A receptor 7	111.95	84400	12500	48400
Lonp2	Q3MIB4	Lon protease homolog 2, peroxisomal	94.392	49300	43800	46500
Fam129b	B4F7E8	Niban-like protein 1	84.73	70700	21700	46200
Adarb1	P51400	Double-stranded RNA-specific editase 1	77.924	3190	89100	46100
Celsr2	Q9QYP2	Cadherin EGF LAG seven-pass G-type receptor 2 (Fragment)	233.48	91300	378	45800
Txnrd2	Q9Z0J5	Thioredoxin reductase 2, mitochondrial	56.574	43000	47800	45400
Mrpl22	P0C2C0	39S ribosomal protein L22, mitochondrial	24.039	68100	22000	45000
Tmem186	Q4KLZ1	Transmembrane protein 186	24.64	49800	40000	44900
Brinp2	Q8K1M8	BMP/retinoic acid-inducible neural-specific protein 2	89.138	58100	31300	44700
Hacl1	Q8CHM7	2-hydroxyacyl-CoA lyase 1	63.615	35400	52400	43900
Ophn1	P0CAX5	Oligophrenin-1	91.838	66600	21200	43900
Pdcd2	P47816	Programmed cell death protein 2	38.444	51500	32500	42000
Unc5c	Q761X5	Netrin receptor UNC5C	103.13	74900	7850	41400
Tbl3	Q5U2W5	Transducin beta-like protein 3	88.371	69500	12500	41000
Eci1	P23965	Enoyl-CoA delta isomerase 1, mitochondrial	32.254	36700	43300	40000
Mpp3	O88954	MAGUK p55 subfamily member 3	66.588	45200	34800	40000
Slc30a7	Q5BJM8	Zinc transporter 7	41.773	28600	50400	39500
Spg7	Q7TT47	Paraplegin	82.122	77800	561	39200
Mipep	Q01992	Mitochondrial intermediate peptidase	80.673	56100	18600	37400
Epha3	O08680	Ephrin type-A receptor 3	110.23	73300	1280	37300
Gfm2	Q5BJP6	Ribosome-releasing factor 2, mitochondrial	85.913	65800	8720	37200
Ica1	Q63054	Islet cell autoantigen 1	54.662	50600	23800	37200
Cnot10	Q5XIA4	CCR4-NOT transcription complex subunit 10	81.818	54200	19300	36700
Kcnab1	P63144	Voltage-gated potassium channel subunit beta-1	44.709	28900	44300	36600
Mapk7	P0C865	Mitogen-activated protein kinase 7	87.826	11200	61700	36500
Pex6	P54777	Peroxisome assembly factor 2	104.43	53600	19200	36400
Sorbs2	O35413	Sorbin and SH3 domain-containing protein 2	134.06	43400	28900	36100
Lrrc16b	Q5XHY1	Leucine-rich repeat-containing protein 16B	149.9	61900	9990	35900
Dcps	Q8K4F7	m7GpppX diphosphatase	38.713	65100	6420	35800
Hcn3	Q9JKA8	Potassium/sodium hyperpolarization-activated cyclic nucleotide-gated channel 3	86.808	38900	31300	35100
Ppp4c	Q5BJ92	Serine/threonine-protein phosphatase 4 catalytic subunit	35.067	45300	23800	34500
Fam160a2	Q66H54	FTS and Hook-interacting protein	86.271	55300	13700	34500
Sipa1l2	Q5JCS6	Signal-induced proliferation-associated 1-like protein 2	189.65	48900	18800	33800
Sike1	Q5FWT9	Suppressor of IKBKE 1	23.578	47200	19200	33200
Ppp2r2c	P97888	Serine/threonine-protein phosphatase 2A 55 kDa regulatory subunit B gamma isoform	51.473	51100	15200	33200
Specc1l	Q2KN99	Cytospin-A	124.34	57100	8880	33000
Eif2ak2	Q63184	Interferon-induced, double-stranded RNA-activated protein kinase	58.258	52600	13200	32900
Trip12	F1LP64	E3 ubiquitin-protein ligase TRIP12	223.93	43200	22400	32800
Reln	P58751	Reelin	387.53	54600	10000	32300
Lchn	Q0PGW2	Protein LCHN	51.369	48200	14800	31500
Abca5	Q8CF82	ATP-binding cassette sub-family A member 5	185.81	58400	4260	31300
Man1b1	B2GUY0	Endoplasmic reticulum mannosyl-oligosaccharide 1,2-alpha-mannosidase	74.894	52800	9600	31200
Psd	Q9ESQ7	PH and SEC7 domain-containing protein 1	70.817	30000	31400	30700
Esyt1	Q9Z1X1	Extended synaptotagmin-1	121.16	26700	32300	29500
Lactb2	Q561R9	Beta-lactamase-like protein 2	32.484	34500	23900	29200
Rasa3	Q9QYJ2	Ras GTPase-activating protein 3	96.019	44300	12800	28500
Pik3c3	O88763	Phosphatidylinositol 3-kinase catalytic subunit type 3	101.53	25900	29000	27400
Nup153	P49791	Nuclear pore complex protein Nup153	152.82	43700	10600	27200
Acbd5	A0FKI7	Acyl-CoA-binding domain-containing protein 5	56.781	18300	34000	26100
Polr2g	P62489	DNA-directed RNA polymerase II subunit RPB7	19.294	29200	23000	26100
Megf8	Q9QYP0	Multiple epidermal growth factor-like domains protein 8	297.55	13900	37700	25800
Mprip	Q9ERE6	Myosin phosphatase Rho-interacting protein	117.11	35700	14600	25100
Lrrc7	P70587	Leucine-rich repeat-containing protein 7	166.88	45400	4660	25000
Nell2	Q62918	Protein kinase C-binding protein NELL2	90.952	41100	8340	24700
Lrrc8d	Q5U308	Leucine-rich repeat-containing protein 8D	97.939	12700	36400	24600
Fem1b	P0C6P7	Protein fem-1 homolog B	70.236	43700	4240	24000
Zmat3	O08781	Zinc finger matrin-type protein 3	31.918	8000	39400	23700
Gpam	P97564	Glycerol-3-phosphate acyltransferase 1, mitochondrial	93.713	42300	4920	23600
Mib2	Q68LP1	E3 ubiquitin-protein ligase MIB2	105.54	5960	41200	23600
Arhgef1	Q9Z1I6	Rho guanine nucleotide exchange factor 1	102.6	34500	11600	23100
Wdr81	D4A929	WD repeat-containing protein 81	212.26	34600	11400	23000
Grik3	P42264	Glutamate receptor ionotropic, kainate 3	104.07	33000	8270	20700
Nacc1	O35260	Nucleus accumbens-associated protein 1	56.449	28800	11800	20300
Tmem245	D3ZXD8	Transmembrane protein 245	97.281	32100	8200	20200
Hap1	P54256	Huntingtin-associated protein 1	70.212	32200	6330	19200
Cpox	Q3B7D0	Oxygen-dependent coproporphyrinogen-III oxidase, mitochondrial	49.278	34500	3880	19200
Rpap3	Q68FQ7	RNA polymerase II-associated protein 3	74.644	27600	10400	19000
Met	P97523	Hepatocyte growth factor receptor	153.94	20500	16400	18500
Ubr5	Q62671	E3 ubiquitin-protein ligase UBR5	308.02	32600	4290	18400
Tars2	Q68FW7	Threonine--tRNA ligase, mitochondrial	81.671	22600	13800	18200
Golim4	Q5BJK8	Golgi integral membrane protein 4	76.596	17700	17700	17700
Dnajc16	Q5FVM7	DnaJ homolog subfamily C member 16	88.868	19200	16100	17600
Abca2	Q9ESR9	ATP-binding cassette sub-family A member 2	270.92	32200	2790	17500
Gucy1a2	Q9WVI4	Guanylate cyclase soluble subunit alpha-2	81.786	31200	2010	16600
Rgs12	O08774	Regulator of G-protein signaling 12	150.47	28400	3970	16200
Speg	Q63638	Striated muscle-specific serine/threonine-protein kinase	354.16	201	31000	15600
Acox3	Q63448	Peroxisomal acyl-coenzyme A oxidase 3	78.445	22100	8500	15300
Atg5	Q3MQ06	Autophagy protein 5	32.398	16200	12400	14300
Scn3a	P08104	Sodium channel protein type 3 subunit alpha	221.38	3150	25400	14300
Marc2	O88994	Mitochondrial amidoxime reducing component 2	38.248	15500	12700	14100
Pds5a	A4L9P7	Sister chromatid cohesion protein PDS5 homolog A	150.28	18000	9640	13800
Zfand5	B5DF11	AN1-type zinc finger protein 5	23.088	8360	19000	13700
Bfar	Q5PQN2	Bifunctional apoptosis regulator	53.024	20600	6570	13600
Lrrc8c	Q498T9	Leucine-rich repeat-containing protein 8C	92.462	17300	9230	13300
Itpr1	P29994	Inositol 1,4,5-trisphosphate receptor type 1	313.26	25600	780	13200
Clcc1	Q9WU61	Chloride channel CLIC-like protein 1	61.173	4620	21300	13000
Znf830	Q3MHS2	Zinc finger protein 830	41.616	13500	11900	12700
Limk2	P53670	LIM domain kinase 2	72.201	15000	10000	12500
Adcy6	Q03343	Adenylate cyclase type 6	130.5	18200	5940	12100
Ryr2	B0LPN4	Ryanodine receptor 2	562.95	3320	19500	11400
Ampd3	O09178	AMP deaminase 3	88.482	18600	3730	11200
Vldlr	P98166	Very low-density lipoprotein receptor	96.541	2150	18000	10100
Golga4	Q5U4E6	Golgin subfamily A member 4	260.19	8090	11500	9810
Ipo13	Q9JM04	Importin-13	108.19	16600	1600	9090
Dtnbp1	Q5M834	Dysbindin	39.742	2950	15100	9000
Irs1	P35570	Insulin receptor substrate 1	131.18	14600	3020	8810
Gne	O35826	Bifunctional UDP-N-acetylglucosamine 2-epimerase/N-acetylmannosamine kinase	79.226	9960	6860	8410
Dus3l	Q3KRC5	tRNA-dihydrouridine(47) synthase [NAD(P)(+)]-like	71.539	6620	8940	7780
Ralgapa2	P86411	Ral GTPase-activating protein subunit alpha-2	210.33	11100	3170	7120
Trhde	Q10836	Thyrotropin-releasing hormone-degrading ectoenzyme	117.29	6000	7920	6960
Nefh	P16884	Neurofilament heavy polypeptide	115.38	10500	1470	6010
Pde4a	P54748	cAMP-specific 3,5-cyclic phosphodiesterase 4A	93.438	5700	4210	4950
Dlgap1	P97836	Disks large-associated protein 1	110.18	5740	3310	4520
Sphkap	P0C6C0	A-kinase anchor protein SPHKAP	184.45	2110	3950	3030
Grip2	Q9WTW1	Glutamate receptor-interacting protein 2	112.49	1420	3060	2240

## Sheet: APEX_BP
Term	Overlap	P-value	Adjusted P-value	Old P-value	Old Adjusted P-value	Odds Ratio	Combined Score	Genes
intracellular protein transport (GO:0006886)	42/336	2.19234e-10	6.87738e-07	0	0	3.40404	75.7089	ARF3;RTN2;C2CD5;RAB5B;NLGN1;RAB5C;STX16;ARL6;CSE1L;PDCD6;KATNB1;AP2A1;VPS26B;IPO7;DNAJC27;NAPG;HDAC6;IPO5;SNX1;GGA3;IPO9;XPO5;RAB24;TNPO1;RAB6B;TNPO2;TBC1D15;TNPO3;TBC1D10B;SNX6;APPL1;RABGAP1L;STAT3;AP3D1;XPO7;STAM;WDR11;SGSM1;CAMSAP3;CTTN;TBC1D5;RAB5A
cellular protein localization (GO:0034613)	40/329	1.34955e-09	2.11676e-06	0	0	3.2906	67.2055	ARF3;PTPRU;CNTNAP2;RAB5B;RAB5C;STX16;ARL6;PDCD6;AP2A1;VPS26B;DNAJC27;NAPG;SEPTIN11;HDAC6;SNX1;GGA3;EPB41L3;RAB24;RAB6B;TBC1D15;TBC1D10B;SNX6;RABGAP1L;AP3D1;SEPTIN5;SEPTIN6;ANK2;SEPTIN3;SEPTIN7;SEPTIN8;WDR11;SGSM1;REEP1;RAP2A;RRAGC;CTTN;PACS2;TBC1D5;RAB5A;FERMT2
cytosolic transport (GO:0016482)	21/116	1.24247e-08	1.29921e-05	0	0	5.18536	94.392	SPAG9;STX16;VPS13C;AP2A1;VPS26B;HOOK3;RNF126;SNX1;SNX2;VPS51;AP1G1;TBC1D5;VPS50;UBE2O;WASHC1;RAB6B;RAB5A;SNX5;RAB9B;TBC1D10B;SNX6
retrograde transport, endosome to Golgi (GO:0042147)	18/88	1.87375e-08	1.46949e-05	0	0	6.01765	107.07	SPAG9;STX16;TRAPPC10;SNX12;VPS26B;RNF126;SNX1;SNX2;VPS51;TBC1D5;VPS50;UBE2O;WASHC1;RAB6B;SNX5;RAB9B;TBC1D10B;SNX6
inner mitochondrial membrane organization (GO:0007007)	13/49	6.84988e-08	4.29761e-05	0	0	8.4142	138.804	TOMM70;ATP5PF;APOOL;MTX1;AGK;ATP5PB;MTX2;ATP5F1C;APOO;ATP5F1A;CHCHD3;ATP5F1B;ATP5ME
protein transport (GO:0015031)	39/369	1.04221e-07	5.44903e-05	0	0	2.80009	45.0164	ARF3;ATP6V1A;LRSAM1;RAB5B;RAB5C;STX16;ARL6;PDCD6;AP2A1;MIA3;VPS26B;DNAJC27;NAPG;HDAC6;SCAMP4;SNX4;SNX1;GGA3;CHMP1A;RAB24;TOM1;ATP6V1H;ATP6V1D;RAB6B;SPTBN1;TBC1D15;TBC1D10B;SNX6;RABGAP1L;ATP6V1G2;AP3D1;ANK3;SCAMP3;WDR11;SGSM1;CTTN;TBC1D5;ATP6V0D1;RAB5A
glycerophospholipid biosynthetic process (GO:0046474)	24/177	3.63971e-07	0.000163111	0	0	3.68201	54.5902	ARF3;MTMR1;ACHE;DGKE;AGK;CPNE7;MBOAT7;CPNE6;PTEN;MTMR9;DDHD1;AGPAT1;LCLAT1;MTMR6;AGPAT3;MTMR7;INPP5F;DGKQ;PITPNM2;INPP5K;CPNE3;GPD1L;SBF1;RAB5A
response to calcium ion (GO:0051592)	18/107	4.27011e-07	0.000167442	0	0	4.72827	69.347	NLGN1;AHCYL1;DMTN;CPNE4;CPNE7;PDCD6;CPNE6;HPCA;ALG2;BRAF;ADCY1;SYT7;SYT17;STIM1;CPNE3;CPNE2;CALM1;SLC25A12
regulation of anatomical structure morphogenesis (GO:0022603)	19/123	8.02562e-07	0.000279737	0	0	4.27298	59.9733	CHRNB2;EPHA4;SEMA4D;SDC2;STAT2;CYRIB;TANC2;WARS1;STRIP1;RAP2A;ABI2;HECW2;KIF1A;PDLIM5;PDZD8;FERMT2;CLASP1;PPFIA2;MARCHF5
protein polyubiquitination (GO:0000209)	33/314	1.1255e-06	0.00035178	0	0	2.7688	37.9251	LRSAM1;PSMD12;RNF14;UBE2D3;UBE3A;FBXO41;UBE2L3;UBE2J1;PSMD8;NPEPPS;PSMD6;HECTD1;PSMD4;UBB;UBE2Q1;PSMD5;CDC26;PSMD3;ARIH2;ARIH1;MARCHF5;UBE2H;FBXO2;FBXL17;WWP1;RNF126;TRAF3;HECW2;UBE2O;STUB1;UBE2V1;UBE2K;TRIM32
cristae formation (GO:0042407)	9/28	1.23353e-06	0.00035178	0	0	10.9935	149.573	APOO;ATP5PF;ATP5F1A;ATP5F1B;CHCHD3;APOOL;ATP5PB;ATP5F1C;ATP5ME
mitochondrial electron transport, NADH to ubiquinone (GO:0006120)	10/39	3.18467e-06	0.000713594	0	0	8.00845	101.364	NDUFB9;NDUFA8;NDUFA7;NDUFS8;NDUFB10;NDUFA12;NDUFB11;NDUFA4;NDUFB1;NDUFV1
phospholipid dephosphorylation (GO:0046839)	10/39	3.18467e-06	0.000713594	0	0	8.00845	101.364	MTMR1;PLPPR1;INPP5F;PLPPR3;PLPPR4;PTEN;MTMR9;INPP5K;MTMR6;MTMR7
regulation of peptidyl-threonine phosphorylation (GO:0010799)	10/39	3.18467e-06	0.000713594	0	0	8.00845	101.364	RPTOR;SPRED3;DMTN;CAB39;DGKQ;WNK3;INPP5K;CALM1;UBE2K;EIF4G1
membrane organization (GO:0061024)	27/242	3.42149e-06	0.000715547	0	0	2.94906	37.1152	MTCH1;AP2A1;CBL;ACTB;NAPG;TIMM50;UBB;CHMP1A;DVL2;REPS2;SPTBN1;OSBPL2;AP3D1;HIP1R;ANK2;ARPC4;ANK3;STAM;EPS15L1;GAPVD1;REEP1;RABIF;CTTN;DNAJC6;CHMP4B;RAB5A;CHMP7
protein dephosphorylation (GO:0006470)	19/139	5.22717e-06	0.00101673	0	0	3.70014	44.9998	PTPRU;DUSP3;PPTC7;PTEN;PPP2R5A;PPP2R5C;MTMR6;MTMR7;TIMM50;PTPRD;PPP2CA;STK11;UBASH3B;PPP2R1A;PPP2R5E;TAB1;SBF1;PHPT1;NCK1
aerobic electron transport chain (GO:0019646)	13/70	5.50987e-06	0.00101673	0	0	5.3084	64.2792	NDUFB9;NDUFA8;NDUFA7;NDUFB10;NDUFA12;NDUFB11;NDUFA4;NDUFB1;UQCR11;UQCR10;NDUFS8;CYC1;NDUFV1
dephosphorylation (GO:0016311)	20/153	5.95028e-06	0.001037	0	0	3.5161	42.306	PTPRU;DUSP3;PLPPR1;PLPPR3;PLPPR4;PTEN;PPP2R5A;PPP2R5C;MTMR6;MTMR7;TIMM50;PTPRD;PPP2CA;STK11;PPP2R1A;PPP2R5E;INPP5K;TAB1;SBF1;PHPT1
mitochondrial ATP synthesis coupled electron transport (GO:0042775)	13/71	6.49033e-06	0.00107159	0	0	5.2166	62.3133	NDUFB9;NDUFA8;NDUFA7;NDUFB10;NDUFA12;NDUFB11;NDUFA4;NDUFB1;UQCR11;UQCR10;NDUFS8;CYC1;NDUFV1
ubiquitin-dependent protein catabolic process (GO:0006511)	33/354	1.47635e-05	0.00222288	0	0	2.41865	26.9035	PSMD12;RNF11;UBA6;RNF14;UBE2D3;AGAP3;CBL;UBE2L3;PSMD8;PSMD6;PSMD4;PSMD5;CDC26;PSMD3;PCBP2;ARIH2;ARIH1;UBQLN2;ATE1;UBE2H;USP9X;VPS37C;FBXL17;WWP1;VPS37A;ARMC8;PPP2R5C;RNF126;HECW2;GID8;STUB1;UBE2K;TRIM32
stress granule assembly (GO:0034063)	7/21	1.48806e-05	0.00222288	0	0	11.5792	128.708	ATXN2L;DDX6;YTHDF1;ATXN2;DDX3X;YTHDF3;UBAP2L
lamellipodium organization (GO:0097581)	8/29	1.73795e-05	0.00247816	0	0	8.8297	96.7755	CYFIP1;ABLIM1;SNX1;SNX2;DMTN;ABLIM3;CTTN;S1PR1
protein deubiquitination (GO:0016579)	27/267	2.09698e-05	0.00271463	0	0	2.63838	28.4218	USP14;PSMD12;WDR48;MINDY2;USP11;PTEN;SPATA2;ABRAXAS2;ACTB;USP19;PSMD8;PSMD6;RHOT1;PSMD4;UBB;PSMD5;PSMD3;USP46;USP24;USP8;USP47;USP5;USP9X;STAM;COPS5;TRAF3;TAB1
neuron projection morphogenesis (GO:0048812)	18/140	2.15837e-05	0.00271463	0	0	3.44335	36.9938	CNTNAP2;NLGN1;TRIO;NYAP1;SDC2;PLPPR4;DOCK7;PTEN;ANK3;NYAP2;S100B;ACTB;UBB;CTTN;DVL1;EPB41L3;DIP2A;CTNNA2
regulation of translational initiation (GO:0006446)	12/68	2.1634e-05	0.00271463	0	0	4.98175	53.5102	YTHDF1;DDX3X;LARP1;YTHDF3;AGO2;HABP4;EIF4EBP2;EIF4G3;EIF4B;NCK1;PAIP1;EIF4G1
cellular response to calcium ion (GO:0071277)	12/69	2.52069e-05	0.00304132	0	0	4.8941	51.8206	NLGN1;DMTN;CPNE4;CPNE7;CPNE6;HPCA;CPNE3;BRAF;CPNE2;ADCY1;SYT7;SYT17
protein modification by small protein removal (GO:0070646)	27/276	3.76737e-05	0.00396448	0	0	2.54181	25.8923	USP14;PSMD12;WDR48;USP11;PTEN;COPS7A;ABRAXAS2;ACTB;USP19;PSMD8;PSMD6;RHOT1;PSMD4;UBB;PSMD5;PSMD3;USP46;USP24;USP8;USP47;USP5;USP9X;STAM;COPS6;COPS5;TRAF3;TAB1
regulation of dendritic spine morphogenesis (GO:0061001)	8/32	3.81127e-05	0.00396448	0	0	7.72478	78.5993	EPHA4;NLGN1;ABI2;PTEN;KIF1A;PDLIM5;TANC2;PPFIA2
regulation of autophagy (GO:0010506)	24/231	3.83794e-05	0.00396448	0	0	2.71376	27.5935	ATP6V1A;ATP6V1G2;BAD;STAT3;WDR41;MTMR9;RAB39B;VPS26B;HDAC6;RPTOR;STK11;RRAGC;ABL2;ATP6V1H;TAB3;WDR6;ATP6V0D1;WASHC1;ATP6V1D;EIF4G3;SNX5;SNX6;EIF4G1;UBQLN2
cytoskeleton-dependent cytokinesis (GO:0061640)	12/72	3.91772e-05	0.00396448	0	0	4.64866	47.1719	USP8;SEPTIN5;CHMP4B;SEPTIN6;SPIRE1;SEPTIN3;ANK3;SEPTIN11;SPTBN1;SEPTIN7;CIT;SEPTIN8
negative regulation of supramolecular fiber organization (GO:1902904)	12/72	3.91772e-05	0.00396448	0	0	4.64866	47.1719	CAMSAP3;VBP1;DYRK1A;HIP1R;KATNB1;CYRIB;TUBB4A;ARPIN;KANK4;PFDN6;CLASP1;CAMSAP2
mitochondrial ATP synthesis coupled proton transport (GO:0042776)	6/17	4.30392e-05	0.00409134	0	0	12.6186	126.86	ATP5PF;ATP5F1A;ATP5F1B;ATP5PB;ATP5F1C;ATP5ME
negative regulation of peptidyl-threonine phosphorylation (GO:0010801)	6/17	4.30392e-05	0.00409134	0	0	12.6186	126.86	SPRED3;DMTN;DGKQ;INPP5K;CALM1;EIF4G1
phosphatidylinositol dephosphorylation (GO:0046856)	7/25	5.31547e-05	0.0049043	0	0	9.00416	88.6217	MTMR1;INPP5F;PTEN;MTMR9;INPP5K;MTMR6;MTMR7
protein import into nucleus (GO:0006606)	12/76	6.79141e-05	0.00608704	0	0	4.35721	41.8173	IPO9;CSE1L;STAT3;KPNA6;KPNA4;TNPO1;IPO7;KPNA3;TNPO2;TNPO3;IPO5;APPL1
positive regulation of ion transmembrane transporter activity (GO:0032414)	7/26	7.01333e-05	0.00611134	0	0	8.52982	81.5887	TRPC6;SLC6A9;NDUFA4;WNK2;WNK3;ANK2;ANK3
ATP synthesis coupled proton transport (GO:0015986)	6/19	8.7832e-05	0.00725077	0	0	10.6761	99.7161	ATP5PF;ATP5F1A;ATP5F1B;ATP5PB;ATP5F1C;ATP5ME
regulation of glucose transmembrane transport (GO:0010827)	6/19	8.7832e-05	0.00725077	0	0	10.6761	99.7161	RTN2;C2CD5;SLC2A1;INPP5K;BRAF;APPL1
mitochondrion-endoplasmic reticulum membrane tethering (GO:1990456)	4/7	9.49858e-05	0.00726757	0	0	30.7839	285.114	AHCYL1;PACS2;CALM1;PDZD8
positive regulation of miRNA mediated inhibition of translation (GO:1905618)	4/7	9.49858e-05	0.00726757	0	0	30.7839	285.114	DDX6;AGO2;STAT3;EIF4G1
regulation of miRNA mediated inhibition of translation (GO:1905616)	4/7	9.49858e-05	0.00726757	0	0	30.7839	285.114	DDX6;AGO2;STAT3;EIF4G1
positive regulation of proteasomal ubiquitin-dependent protein catabolic process (GO:0032436)	12/79	9.99987e-05	0.00746895	0	0	4.16146	38.3285	DNAJB2;BCAP31;ZER1;HECTD1;USP5;RNF14;DVL1;ARIH2;STUB1;ARIH1;HSPA1B;UBQLN2
regulation of cell migration (GO:0030334)	34/408	0.000106564	0.00777419	0	0	2.13545	19.5325	RET;PTPRU;PTEN;MIA3;FGF1;ERBB4;PLXNA1;PHACTR1;CPNE3;SRGAP3;CTNNA2;SRGAP1;WASHC1;ARPIN;PLXNA4;APPL1;SPAG9;EPHA4;CARMIL2;DUSP3;YTHDF3;SEMA4D;SEMA6D;STAT3;ELP3;CYRIB;RAP2C;CAMSAP3;AFDN;RAP2A;STK26;NUMB;TRIM32;FERMT2
activation of GTPase activity (GO:0090630)	14/105	0.000116659	0.00831723	0	0	3.5788	32.4105	RAP1GAP2;BCAS3;RABGAP1L;DOCK7;RANGAP1;RAP1GAP;MTSS2;BCR;SGSM1;ABR;TBC1D5;TBC1D15;TBC1D10B;SLC27A4
proteasomal protein catabolic process (GO:0010498)	21/205	0.000140065	0.00968207	0	0	2.66473	23.6452	ATE1;PSMD12;UBE2D3;FBXL17;WWP1;ARMC8;AGAP3;PPP2R5C;PSMD8;PSMD6;RNF126;PSMD4;PSMD5;HECW2;DDI2;PSMD3;PCBP2;GID8;STUB1;UBE2K;UBXN6
tRNA aminoacylation (GO:0043039)	8/38	0.000141975	0.00968207	0	0	6.17789	54.7352	GARS1;SARS1;RARS1;NARS1;PPA1;IARS2;YARS1;WARS1
protein polymerization (GO:0051258)	10/59	0.000148025	0.00987985	0	0	4.73474	41.7516	DIAPH1;ARL6;ZNF207;CHMP4B;SPIRE1;TPPP;ARHGAP6;CKAP5;UBE2K;WASF3
regulation of dendritic spine development (GO:0060998)	6/21	0.000163538	0.0106879	0	0	9.25169	80.6605	NLGN1;PSEN1;KIF1A;CPEB3;TANC2;PPFIA2
multivesicular body assembly (GO:0036258)	7/30	0.000187638	0.0120126	0	0	7.0449	60.4523	VTA1;CHMP1A;VPS37C;CHMP4B;VPS37A;STAM;CHMP7
positive regulation of ion transport (GO:0043270)	9/50	0.000196467	0.0123263	0	0	5.08869	43.4321	CHRNB2;CACNB2;SNX4;AHCYL1;TRPC6;WNK3;ANK2;ANK3;GPD1L
negative regulation of protein phosphorylation (GO:0001933)	17/152	0.000208143	0.0128028	0	0	2.93329	24.8663	DMTN;SEMA4D;PTEN;WARS1;SPRED3;UBASH3B;CAMK2N1;DGKQ;CAMK2N2;DVL1;AKT1S1;INPP5K;TAB1;GPD1L;CALM1;EIF4G1;NCK1
phosphatidylinositol metabolic process (GO:0046488)	14/112	0.000233512	0.0135771	0	0	3.32195	27.7791	ARF3;MTMR1;LPGAT1;MBOAT7;PTEN;MTMR9;LCLAT1;MTMR6;MTMR7;INPP5F;PITPNM2;INPP5K;SBF1;RAB5A
regulation of macroautophagy (GO:0016241)	14/112	0.000233512	0.0135771	0	0	3.32195	27.7791	ATP6V1A;ATP6V1G2;VPS26B;HDAC6;RPTOR;NRBP2;LARP1;RRAGC;ATP6V1H;ATP6V0D1;ATP6V1D;SNX5;SNX6;UBQLN2
multivesicular body organization (GO:0036257)	7/31	0.000233714	0.0135771	0	0	6.75101	56.448	VTA1;CHMP1A;VPS37C;CHMP4B;VPS37A;STAM;CHMP7
synapse organization (GO:0050808)	15/126	0.000244251	0.0139312	0	0	3.14408	26.1503	CYFIP1;ACHE;C1QA;NLGN1;PTEN;RAB39B;ANK3;PSEN1;ELFN1;PTPRD;CACNB2;CACNB4;DVL1;SNCG;PPFIA2
plasma membrane bounded cell projection morphogenesis (GO:0120039)	9/52	0.000267806	0.0150019	0	0	4.8515	39.9048	CNTNAP2;SNX1;TRIO;NYAP1;SNX2;CTTN;UBB;EPB41L3;NYAP2
mitochondrial membrane organization (GO:0007006)	7/32	0.000288483	0.0158767	0	0	6.48063	52.8228	APOO;CHCHD3;APOOL;MTX1;BAD;MTX2;TIMM50
nitrogen compound transport (GO:0071705)	16/143	0.00031495	0.0169997	0	0	2.93229	23.6433	SLC12A2;RALBP1;SLC43A2;SLC7A14;SLC1A4;MIA3;SCAMP3;SLC6A3;SCAMP4;SLC5A7;SNX4;CHMP1A;TOM1;SLC38A3;SLC18A2;ABCG2
glycerolipid biosynthetic process (GO:0045017)	4/9	0.000319727	0.0169997	0	0	18.4684	148.635	AGK;CPNE7;CPNE6;CPNE3
tRNA aminoacylation for protein translation (GO:0006418)	8/43	0.000350181	0.0183087	0	0	5.29395	42.1242	GARS1;SARS1;RARS1;NARS1;PPA1;IARS2;YARS1;WARS1
protein-containing complex assembly (GO:0065003)	24/267	0.000358589	0.0184409	0	0	2.30733	18.3048	SEC23A;DMTN;SEC24A;GPAA1;BAD;TRAPPC10;PDCD6;TRAPPC5;SLC2A1;RANBP9;DNAJB14;TRAPPC9;NOL3;NAPG;CD2AP;AFDN;PPP2R1A;TRAPPC6B;PPP6R3;REPS2;KIFAP3;KPNA3;FERMT2;WASF3
cellular response to metal ion (GO:0071248)	15/131	0.000373914	0.0187314	0	0	3.00777	23.7358	SLC12A2;NLGN1;TIGAR;DMTN;CPNE4;CPNE7;CPNE6;HPCA;BRAF;ANK3;ADCY1;SYT7;SYT17;CPNE3;CPNE2
protein ubiquitination (GO:0016567)	39/525	0.000376181	0.0187314	0	0	1.88555	14.8684	LRSAM1;RNF11;PSMD12;RNF14;UBA6;UBE2D3;CUL2;MYCBP2;UBE3A;DTX3;CBL;FBXO41;UBE2L3;UBE2J1;PSMD8;NPEPPS;PSMD6;PSMD4;UBB;UBE2Q1;PSMD5;PSMD3;ARIH2;ARIH1;MARCHF5;UBE2H;USP5;EIPR1;USP9X;FBXO2;FBXL17;WWP1;RNF126;HECW2;UBE2O;STUB1;UBE2V1;TRIM32;UBE2K
positive regulation of ubiquitin-dependent protein catabolic process (GO:2000060)	11/79	0.000420743	0.020623	0	0	3.75381	29.1802	DNAJB2;ZER1;HECTD1;USP5;RNF14;DVL1;PTEN;ARIH2;STUB1;ARIH1;HSPA1B
proteasome-mediated ubiquitin-dependent protein catabolic process (GO:0043161)	27/321	0.000456992	0.0216667	0	0	2.14764	16.5171	PSMD12;UBE2D3;CUL2;AGAP3;USP19;UBE2J1;PSMD8;DNAJB2;PSMD6;PSMD4;UBB;PSMD5;CDC26;PSMD3;PCBP2;UBQLN2;FBXO2;FBXL17;WWP1;DNAJB14;ARMC8;PPP2R5C;RNF126;HECW2;GID8;STUB1;UBE2K
endosome transport via multivesicular body sorting pathway (GO:0032509)	6/25	0.000462758	0.0216667	0	0	7.30244	56.0704	VTA1;CHMP1A;CHMP4B;LYST;CHMP7;UBXN6
regulation of mitochondrial fission (GO:0090140)	6/25	0.000462758	0.0216667	0	0	7.30244	56.0704	RALBP1;STAT2;SPIRE1;DDHD1;CYRIB;MARCHF5
axonogenesis (GO:0007409)	22/240	0.000475387	0.021733	0	0	2.35491	18.0183	RET;ROBO2;CYFIP1;EPHA4;SEMA4D;USP9X;PLPPR4;SEMA6D;DOCK7;GAB1;PTEN;RANBP9;ANK3;S100B;SPTB;ACTB;RAP1GAP;ENAH;DAB1;ULK2;CTNNA2;SPTBN1
regulation of translation (GO:0006417)	18/178	0.000478029	0.021733	0	0	2.62031	20.0345	CYFIP1;DDX6;UPF1;YTHDF1;DDX3X;YTHDF3;PYM1;ELAVL1;GSPT1;ATXN2;RIDA;LARP1;RPS6KA1;CPEB3;EIF4G3;EIF4B;EIF4G1;PAIP1
protein localization to plasma membrane (GO:0072659)	15/136	0.00055868	0.0250368	0	0	2.88272	21.5914	C2CD5;ANK2;ANK3;FAM126B;EFR3B;CACNB2;AFDN;RAP2A;EHD4;PACS2;EPB41L3;WNK3;INPP5K;NECTIN3;SPTBN1
membrane assembly (GO:0071709)	7/36	0.000618867	0.0266556	0	0	5.58558	41.2642	PTPRD;NLGN1;PTEN;CHMP4B;ANK3;CHMP7;SPTBN1
mitochondrial respiratory chain complex I assembly (GO:0032981)	9/58	0.000620292	0.0266556	0	0	4.2561	31.4327	NDUFB9;NDUFA8;NDUFA7;NDUFS8;NDUFB10;NDUFA12;NDUFB11;NDUFB1;NDUFV1
NADH dehydrogenase complex assembly (GO:0010257)	9/58	0.000620292	0.0266556	0	0	4.2561	31.4327	NDUFB9;NDUFA8;NDUFA7;NDUFS8;NDUFB10;NDUFA12;NDUFB11;NDUFB1;NDUFV1
regulation of vesicle-mediated transport (GO:0060627)	12/96	0.000639468	0.0271083	0	0	3.3163	24.391	RAB5B;RAB5C;INPP5F;SNX12;HIP1R;SEPTIN5;ABL2;RAB5A;ATP9A;SYT7;RAB33B;STXBP5L
positive regulation of GTPase activity (GO:0043547)	20/214	0.000661399	0.0276343	0	0	2.4028	17.5912	RAP1GAP2;BCAS3;RABGAP1L;RALBP1;SEMA4D;DOCK7;RANGAP1;RAP1GAP;MTSS2;BCR;SGSM1;ABR;AFDN;TBC1D5;RAB11FIP2;FERMT2;RGS6;TBC1D15;TBC1D10B;SLC27A4
positive regulation of translation in response to stress (GO:0032056)	3/5	0.000678305	0.0276343	0	0	34.5921	252.381	DDX3X;EIF4G1;NCK1
protein localization to axon (GO:0099612)	3/5	0.000678305	0.0276343	0	0	34.5921	252.381	CNTNAP2;EPB41L3;ANK3
vascular transport (GO:0010232)	11/84	0.000716261	0.0288065	0	0	3.49578	25.3146	SLC12A2;SLC24A3;SLC6A9;SLC1A1;SLC2A1;ATP1A2;SLC1A4;SLC38A3;SLC4A4;ABCG2;SLC27A4
regulation of protein autophosphorylation (GO:0031952)	7/37	0.000736133	0.029231	0	0	5.39911	38.9497	RAP2C;RAP2A;DDX3X;PPP2R5E;PPP2R5A;PPP2R5C;CALM1
phosphatidylinositol biosynthetic process (GO:0006661)	14/126	0.000783675	0.0307299	0	0	2.90457	20.7721	ARF3;MTMR1;MBOAT7;PTEN;MTMR9;FAM126B;EFR3B;MTMR6;MTMR7;INPP5F;PITPNM2;INPP5K;SBF1;RAB5A
regulation of small GTPase mediated signal transduction (GO:0051056)	15/141	0.000816254	0.0314776	0	0	2.7676	19.6798	RALBP1;TRIO;ARHGEF12;RASGRF2;CYRIB;ARHGAP5;ARHGAP6;CD2AP;ARHGAP12;BCR;ABR;ARHGAP21;RHOT1;SRGAP3;SRGAP1
neuron projection development (GO:0031175)	17/171	0.000822813	0.0314776	0	0	2.56882	18.2458	EPHA4;CNTNAP2;NLGN1;TRIO;NYAP1;DOCK7;PTEN;FRY;NYAP2;MAPK8IP3;CAMSAP2;UBB;CTTN;GPRIN1;EPB41L3;TBC1D24;DIP2A
transport across blood-brain barrier (GO:0150104)	11/86	0.000874996	0.0330423	0	0	3.4022	23.9559	SLC12A2;SLC24A3;SLC6A9;SLC1A1;SLC2A1;ATP1A2;SLC1A4;SLC38A3;SLC4A4;ABCG2;SLC27A4
regulation of postsynapse organization (GO:0099175)	6/28	0.000884779	0.0330423	0	0	6.30567	44.3299	EPHA4;ABI2;KIF1A;PDLIM5;TANC2;PPFIA2
organelle assembly (GO:0070925)	32/425	0.000977174	0.0360635	0	0	1.90597	13.21	DDX6;DDX3X;ARL6;ZFYVE1;HDAC6;ATXN2;ABLIM1;ABLIM3;CHMP1A;UBAP2L;ATP6V1D;UBQLN2;IQCB1;YTHDF1;YTHDF3;VTA1;VPS37C;SEPTIN6;VPS37A;STAM;SEPTIN7;LSM3;WDR11;ATXN2L;EHD4;PACS2;RP2;ULK2;CHMP4B;ATP6V0D1;CHMP7;ATG2B
negative regulation of kinase activity (GO:0033673)	9/62	0.00101891	0.0371664	0	0	3.93407	27.1019	UBASH3B;CAMK2N1;CAMK2N2;AKT1S1;DVL1;PPP2R5A;INPP5K;TAB1;WARS1
chemical synaptic transmission (GO:0007268)	25/306	0.00110569	0.0398683	0	0	2.07684	14.1376	GABRB2;NLGN1;CHRNA4;CHRM4;CPNE6;SLC1A1;PTEN;SLC1A4;GRM1;RPS6KA1;DVL1;SNCG;SLC12A6;SLC18A2;CHRNB2;DTNA;FCHSD1;SLC5A7;CACNB2;CACNB4;TH;SYPL1;KCNQ2;TBC1D24;CALM1
neuromuscular synaptic transmission (GO:0007274)	5/20	0.00114475	0.0408078	0	0	7.70044	52.1518	CHRNB2;FCHSD1;SLC5A7;DTNA;TBC1D24
regulation of mRNA stability (GO:0043488)	15/146	0.00116811	0.0411727	0	0	2.66127	17.9699	PSMD12;YTHDF1;YTHDF3;ELAVL1;PSMD8;PSMD6;RIDA;LARP1;PSMD4;UBB;PSMD5;PSMD3;TNPO1;EIF4G1;PAIP1
establishment of protein localization to organelle (GO:0072594)	10/76	0.0011899	0.0412302	0	0	3.51206	23.6498	LRSAM1;IPO9;CSE1L;STAT3;TNPO1;IPO7;TNPO2;TNPO3;IPO5;APPL1
regulation of microtubule polymerization (GO:0031113)	7/40	0.00119603	0.0412302	0	0	4.90752	33.0214	CAMSAP3;PRUNE1;DYRK1A;SLAIN2;TUBB4A;CLASP1;CAMSAP2
microtubule polymerization (GO:0046785)	6/30	0.00129893	0.0435027	0	0	5.77959	38.4124	ZNF207;RANBP9;SLAIN2;TPPP;CKAP5;CLASP1
regulation of response to reactive oxygen species (GO:1901031)	3/6	0.00131451	0.0435027	0	0	23.0602	152.988	HEBP2;GCH1;STK26
transmembrane receptor protein tyrosine phosphatase signaling pathway (GO:0007185)	3/6	0.00131451	0.0435027	0	0	23.0602	152.988	PTPRD;PTPRU;TRIO
regulation of organelle assembly (GO:1902115)	10/77	0.00131742	0.0435027	0	0	3.45946	22.9434	ATXN2L;ATXN2;TBC1D5;TRAPPC12;TBC1D24;STAM;RAB5A;TBC1D15;TBC1D10B;UBQLN2
protein localization to membrane (GO:0072657)	18/195	0.00138552	0.0452746	0	0	2.36653	15.5757	C2CD5;NLGN1;AP3D1;ANK2;BRAF;ANK3;FAM126B;EFR3B;CACNB2;RAP2A;EHD4;PACS2;EPB41L3;WNK3;DVL1;INPP5K;SPTBN1;FERMT2
negative regulation of peptidyl-serine phosphorylation (GO:0033137)	5/21	0.00145138	0.046938	0	0	7.21879	47.1765	DMTN;PTEN;INPP5K;GPD1L;NCK1
positive regulation of sodium ion transport (GO:0010765)	4/13	0.0015871	0.0508035	0	0	10.2581	66.1221	AHCYL1;WNK3;ANK3;GPD1L
cytoplasmic microtubule organization (GO:0031122)	8/54	0.00167878	0.0526632	0	0	4.02569	25.7229	CAMSAP3;DST;SLAIN2;FSD1;TPPP;HOOK3;CLASP1;CAMSAP2
regulation of focal adhesion assembly (GO:0051893)	8/54	0.00167878	0.0526632	0	0	4.02569	25.7229	CAMSAP3;BCAS3;DUSP3;DMTN;PTEN;ARHGAP6;CLASP1;FERMT2
regulation of mRNA catabolic process (GO:0061013)	13/122	0.0017478	0.0542857	0	0	2.7684	17.5776	UPF1;PSMD12;YTHDF1;YTHDF3;ELAVL1;PSMD8;PSMD6;PSMD4;UBB;PSMD5;PSMD3;TNPO1;EIF4G1
positive regulation of translational initiation (GO:0045948)	5/22	0.00181444	0.0549045	0	0	6.7938	42.8823	YTHDF1;DDX3X;LARP1;YTHDF3;HABP4
regulation of voltage-gated calcium channel activity (GO:1901385)	5/22	0.00181444	0.0549045	0	0	6.7938	42.8823	CACNB2;CACNB4;HPCA;SRI;CBARP
negative regulation of microtubule polymerization or depolymerization (GO:0031111)	6/32	0.00184677	0.0549045	0	0	5.33445	33.5767	CAMSAP3;DYRK1A;KATNB1;TUBB4A;CLASP1;CAMSAP2
regulation of dendrite morphogenesis (GO:0048814)	6/32	0.00184677	0.0549045	0	0	5.33445	33.5767	CHRNB2;PTPRD;RAP2A;SEMA4D;SDC2;HECW2
lipid modification (GO:0030258)	7/43	0.00185524	0.0549045	0	0	4.49785	28.2903	DGKE;PLPPR1;PLPPR3;PLPPR4;MBOAT7;DGKQ;MBOAT2
endoplasmic reticulum to Golgi vesicle-mediated transport (GO:0006888)	17/185	0.00194926	0.0569999	0	0	2.35302	14.6836	BCAP31;SEC23A;SEC24A;PDCD6;TRAPPC5;ATL2;ANK2;MIA3;ANK3;SPTB;NRBP1;NRBP2;TRAPPC6B;TRAPPC12;GOPC;ACTR10;SPTBN1
modulation of chemical synaptic transmission (GO:0050804)	12/109	0.00196238	0.0569999	0	0	2.86989	17.8898	CHRNB2;BCR;USP46;SLC12A2;ABR;NLGN1;PTEN;EIF4EBP2;ATP1A2;GRM1;CNTNAP4;BEGAIN
regulation of cellular component organization (GO:0051128)	14/139	0.00202904	0.0583953	0	0	2.60072	16.125	RAB5B;RAB5C;SEMA4D;SNX12;HIP1R;CAMSAP2;RAB33B;CAMSAP3;RPTOR;STK11;ABL2;STK38L;MARK4;RAB5A
protein K63-linked ubiquitination (GO:0070534)	7/44	0.00212818	0.0606917	0	0	4.37606	26.9237	RNF126;HECTD1;TRAF3;ARIH2;UBE2O;STUB1;UBE2V1
amino sugar catabolic process (GO:0046348)	3/7	0.00222916	0.0616331	0	0	17.2942	105.601	GNPDA1;GNPDA2;ALDH1A1
dense core granule cytoskeletal transport (GO:0099519)	3/7	0.00222916	0.0616331	0	0	17.2942	105.601	KIF1A;TANC2;PPFIA2
nucleotide-excision repair, DNA damage recognition (GO:0000715)	5/23	0.00223977	0.0616331	0	0	6.41603	39.1466	COPS6;COPS5;UBB;CETN2;COPS7A
regulation of calcium ion transmembrane transport (GO:1903169)	5/23	0.00223977	0.0616331	0	0	6.41603	39.1466	DIAPH1;UBASH3B;ANK2;ATP1A2;CBARP
COPII-coated vesicle budding (GO:0090114)	9/70	0.00243064	0.0663037	0	0	3.41669	20.5671	SEC23A;SEC24A;TRAPPC6B;PDCD6;TRAPPC10;PPP6R3;TRAPPC5;MIA3;TRAPPC9
regulation of calcium ion transport (GO:0051924)	8/58	0.00267265	0.0722768	0	0	3.70286	21.9383	CACNB2;TRPC6;STIM1;HOMER2;WNK3;INPP5K;ANK2;SRI
nucleotide-binding domain, leucine rich repeat containing receptor signaling pathway (GO:0035872)	5/24	0.00273328	0.0732846	0	0	6.07803	35.874	UBB;TAB3;TAB1;UBE2V1;MAP2K6
negative regulation of cell motility (GO:2000146)	12/114	0.00286476	0.0760342	0	0	2.7285	15.9761	RAP2C;EPHA4;AFDN;PTPRU;RAP2A;DUSP3;STK26;PTEN;MIA3;SRGAP3;SRGAP1;ARPIN
cell junction organization (GO:0034330)	9/72	0.00295515	0.0760342	0	0	3.30788	19.2658	C1QA;DVL1;SNCG;RAB39B;PSEN1;ELFN1;ACTB;FERMT2;PPFIA2
positive regulation of secretion by cell (GO:1903532)	9/72	0.00295515	0.0760342	0	0	3.30788	19.2658	SLC12A2;ACHE;CADPS2;RAB2B;GRK2;FRMD4A;RAB5A;CLASP1;CD2AP
intracellular pH reduction (GO:0051452)	6/35	0.00297507	0.0760342	0	0	4.78186	27.8184	ATP6V1A;ATP6V1G2;DMXL2;ATP6V1H;ATP6V0D1;ATP6V1D
regulation of protein polymerization (GO:0032271)	6/35	0.00297507	0.0760342	0	0	4.78186	27.8184	CAMSAP3;FCHSD1;CTTN;PRUNE1;TPPP;CAMSAP2
negative regulation of autophagy (GO:0010507)	8/59	0.00298126	0.0760342	0	0	3.63006	21.1103	NRBP2;STAT3;WDR6;MTMR9;TAB3;WASHC1;EIF4G3;EIF4G1
positive regulation of proteasomal protein catabolic process (GO:1901800)	10/86	0.00304206	0.0769592	0	0	3.04835	17.6659	DNAJB2;ZER1;HECTD1;USP5;RNF14;DVL1;ARIH2;STUB1;ARIH1;HSPA1B
insulin receptor signaling pathway (GO:0008286)	9/73	0.00324889	0.0802711	0	0	3.25602	18.6552	ATP6V1A;C2CD5;ATP6V1G2;GAB1;ATP6V1H;AP3S1;ATP6V0D1;ATP6V1D;APPL1
cellular response to hypoxia (GO:0071456)	13/131	0.00328649	0.0802711	0	0	2.55604	14.6153	PSMD12;TIGAR;BAD;CUL2;FMN2;PSMD8;NPEPPS;PSMD6;PSMD4;UBB;PSMD5;PSMD3;STUB1
cellular protein modification process (GO:0006464)	61/1025	0.00329941	0.0802711	0	0	1.49002	8.514	RET;PTPRU;PIGT;BMPR2;GPAA1;UBE2D3;PTEN;AATK;MIA3;UBE2L3;PSMD8;NRBP2;PSMD6;STK11;PSMD4;PSMD5;PPP2R1A;PPP2R5E;PSMD3;MACROD2;SBF1;FBXO2;LMTK3;FN3KRP;DYRK1A;PPP2R5A;PPP2R5C;NRBP1;CKAP4;BCR;ATG4B;PHPT1;PSMD12;SDC2;CUL2;COPS7A;MTMR6;FBXO41;MTMR7;TIMM50;PPP2CA;GRK2;STK38L;ABL2;MARK4;FN3K;SRPK2;ATE1;OGA;BRAF;PTPRD;COPS6;COPS5;STK26;WNK2;WNK3;STT3A;TAB1;CDK14;RAB5A;UBE2M
negative regulation of cell junction assembly (GO:1901889)	5/25	0.00330091	0.0802711	0	0	5.77382	32.9891	ROBO2;BCAS3;DMTN;PTEN;ARHGAP6
positive regulation of peptidyl-threonine phosphorylation (GO:0010800)	5/25	0.00330091	0.0802711	0	0	5.77382	32.9891	RPTOR;CAB39;WNK3;CALM1;UBE2K
dendrite morphogenesis (GO:0048813)	6/36	0.00344631	0.0807687	0	0	4.62222	26.2101	SDC2;DVL1;PTEN;DIP2A;PHACTR1;CTNNA2
regulation of microtubule-based process (GO:0032886)	6/36	0.00344631	0.0807687	0	0	4.62222	26.2101	CAMSAP3;DIAPH1;TPPP;MARK4;HDAC6;CLASP1
positive regulation of Arp2/3 complex-mediated actin nucleation (GO:2000601)	3/8	0.00345645	0.0807687	0	0	13.8347	78.4081	CYFIP1;ABI2;WASF3
regulation of wound healing, spreading of epidermal cells (GO:1903689)	3/8	0.00345645	0.0807687	0	0	13.8347	78.4081	PTEN;CLASP1;FERMT2
positive regulation of cellular protein metabolic process (GO:0032270)	11/102	0.00349679	0.0807687	0	0	2.80166	15.846	CYFIP2;YTHDF1;DDX3X;YTHDF3;BAD;PYM1;STUB1;CPEB3;ELAVL1;TRIM32;EIF4G1
regulation of proteasomal ubiquitin-dependent protein catabolic process (GO:0032434)	11/102	0.00349679	0.0807687	0	0	2.80166	15.846	DNAJB2;ZER1;HECTD1;USP5;RNF14;DVL1;GLMN;ARIH2;STUB1;ARIH1;HSPA1B
phosphatidic acid biosynthetic process (GO:0006654)	7/48	0.00354138	0.0807687	0	0	3.9483	22.2812	DGKE;DGKQ;DDHD1;GPD1L;AGPAT1;LCLAT1;AGPAT3
purine ribonucleotide biosynthetic process (GO:0009152)	7/48	0.00354138	0.0807687	0	0	3.9483	22.2812	GUCY2C;ADSL;GUCY1B1;ADCY9;ADCY1;ADSS2;COASY
proteolysis involved in cellular protein catabolic process (GO:0051603)	9/74	0.00356512	0.0807687	0	0	3.20576	18.0695	ATE1;ZER1;UBB;USP9X;DDI2;FBXL17;CHMP4B;STUB1;HDAC6
late endosome to vacuole transport via multivesicular body sorting pathway (GO:0032511)	4/16	0.00365609	0.0807687	0	0	7.69237	43.1647	VTA1;CHMP4B;STAM;CHMP7
negative regulation of cell-substrate junction organization (GO:0150118)	4/16	0.00365609	0.0807687	0	0	7.69237	43.1647	BCAS3;DMTN;PTEN;ARHGAP6
negative regulation of focal adhesion assembly (GO:0051895)	4/16	0.00365609	0.0807687	0	0	7.69237	43.1647	BCAS3;DMTN;PTEN;ARHGAP6
neuron cell-cell adhesion (GO:0007158)	4/16	0.00365609	0.0807687	0	0	7.69237	43.1647	RET;NLGN1;NCAM2;ASTN1
response to amino acid starvation (GO:1990928)	9/75	0.00390501	0.0839198	0	0	3.15702	17.5073	RPTOR;ATP6V1A;ATP6V1G2;LARP1;RRAGC;CASTOR2;ATP6V1H;ATP6V0D1;ATP6V1D
post-Golgi vesicle-mediated transport (GO:0006892)	10/89	0.00390836	0.0839198	0	0	2.93213	16.2576	RABIF;AP1G1;DNAJC6;RP2;VPS13C;EXOC6B;AP2A1;GOPC;CLINT1;SCAMP3
protein import (GO:0017038)	10/89	0.00390836	0.0839198	0	0	2.93213	16.2576	IPO9;CSE1L;STAT3;TNPO1;IPO7;TNPO2;GDAP1;TNPO3;IPO5;APPL1
lamellipodium assembly (GO:0030032)	5/26	0.00394862	0.0839198	0	0	5.49859	30.4313	CYFIP1;ABLIM1;DMTN;ABLIM3;S1PR1
phospholipid biosynthetic process (GO:0008654)	6/37	0.00397087	0.0839198	0	0	4.47288	24.7296	AGK;SPHK2;CPNE7;CPNE6;CPNE3;AGPAT3
adherens junction organization (GO:0034332)	7/49	0.00398599	0.0839198	0	0	3.85409	21.2937	AFDN;CADM1;CDH11;NECTIN3;ACTB;FERMT2;NECTIN1
positive regulation of actin filament polymerization (GO:0030838)	7/49	0.00398599	0.0839198	0	0	3.85409	21.2937	FCHSD1;CARMIL2;CTTN;CDC42EP4;SPIRE1;ARPC4;NCK1
macroautophagy (GO:0016236)	12/120	0.00436388	0.0898882	0	0	2.5761	13.9996	TOMM70;UVRAG;TBC1D5;VTA1;VPS41;VPS37C;CHMP4B;ATG4B;VPS37A;STAM;ZFYVE1;UBXN6
actin polymerization or depolymerization (GO:0008154)	7/50	0.00447163	0.0898882	0	0	3.76426	20.3647	ENAH;DIAPH1;ABI2;SPIRE1;VILL;ARHGAP6;WASF3
phosphatidic acid metabolic process (GO:0046473)	7/50	0.00447163	0.0898882	0	0	3.76426	20.3647	DGKE;DGKQ;DDHD1;GPD1L;AGPAT1;LCLAT1;AGPAT3
regulation of cellular component movement (GO:0051270)	7/50	0.00447163	0.0898882	0	0	3.76426	20.3647	DIAPH1;YTHDF1;INPP5F;ERBB4;MYCBP2;ABL2;HDAC6
COPII vesicle coating (GO:0048208)	8/63	0.00450172	0.0898882	0	0	3.36535	18.184	SEC23A;SEC24A;TRAPPC6B;PDCD6;TRAPPC10;PPP6R3;TRAPPC5;TRAPPC9
vesicle coating (GO:0006901)	8/63	0.00450172	0.0898882	0	0	3.36535	18.184	SEC23A;SEC24A;TRAPPC6B;PDCD6;TRAPPC10;PPP6R3;TRAPPC5;TRAPPC9
vesicle targeting, rough ER to cis-Golgi (GO:0048207)	8/63	0.00450172	0.0898882	0	0	3.36535	18.184	SEC23A;SEC24A;TRAPPC6B;PDCD6;TRAPPC10;PPP6R3;TRAPPC5;TRAPPC9
modification-dependent protein catabolic process (GO:0019941)	17/201	0.00459588	0.0898882	0	0	2.1466	11.5543	UBE2H;RNF11;UBA6;RNF14;CBL;UBE2L3;RNF126;UBB;CDC26;PSMD3;ARIH2;PCYOX1L;STUB1;ARIH1;UBE2K;TRIM32;UBQLN2
regulation of Arp2/3 complex-mediated actin nucleation (GO:0034315)	4/17	0.00462505	0.0898882	0	0	7.10028	38.173	CYFIP1;ABI2;CTNNA2;WASF3
import into nucleus (GO:0051170)	9/77	0.00466047	0.0898882	0	0	3.06385	16.4487	IPO9;CSE1L;STAT3;TNPO1;IPO7;TNPO2;TNPO3;IPO5;APPL1
cytoplasmic pattern recognition receptor signaling pathway (GO:0002753)	5/27	0.00468233	0.0898882	0	0	5.24838	28.1521	UBB;TAB3;TAB1;UBE2V1;MAP2K6
L-alpha-amino acid transmembrane transport (GO:1902475)	5/27	0.00468233	0.0898882	0	0	5.24838	28.1521	SLC6A9;SLC1A1;SLC1A4;SLC25A12;SLC25A22
negative regulation of protein polymerization (GO:0032272)	5/27	0.00468233	0.0898882	0	0	5.24838	28.1521	DYRK1A;HIP1R;CYRIB;TUBB4A;KANK4
positive regulation of gene silencing by miRNA (GO:2000637)	5/27	0.00468233	0.0898882	0	0	5.24838	28.1521	DDX6;DDX5;STAT3;AGO2;EIF4G1
positive regulation of protein serine/threonine kinase activity (GO:0071902)	11/106	0.00469929	0.0898882	0	0	2.68314	14.3825	RPTOR;PPP2CA;DDX3X;CCNY;CAB39;DIRAS1;SYAP1;DIRAS2;FGF1;CALM1;FERMT2
cellular response to interleukin-9 (GO:0071355)	3/9	0.00502482	0.0938266	0	0	11.5283	61.0234	STAT5B;STAT1;STAT3
interleukin-9-mediated signaling pathway (GO:0038113)	3/9	0.00502482	0.0938266	0	0	11.5283	61.0234	STAT5B;STAT1;STAT3
regulation of ER-associated ubiquitin-dependent protein catabolic process (GO:1903069)	3/9	0.00502482	0.0938266	0	0	11.5283	61.0234	BCAP31;USP14;UBQLN2
response to misfolded protein (GO:0051788)	3/9	0.00502482	0.0938266	0	0	11.5283	61.0234	DNAJB14;STUB1;HDAC6
regulation of dendrite development (GO:0050773)	6/39	0.0051939	0.0952822	0	0	4.20136	22.1003	CHRNB2;RAP2A;SEMA4D;SDC2;HECW2;CAMSAP2
regulation of ion transmembrane transporter activity (GO:0032412)	6/39	0.0051939	0.0952822	0	0	4.20136	22.1003	AHCYL1;TRPC6;SPHK2;WNK3;ANK2;GPD1L
regulation of protein targeting to mitochondrion (GO:1903214)	6/39	0.0051939	0.0952822	0	0	4.20136	22.1003	NPEPPS;BAG4;ABLIM3;UBE2D3;ARIH2;UBE2L3
cellular response to epidermal growth factor stimulus (GO:0071364)	5/28	0.00550788	0.0981718	0	0	5.01993	26.1115	STAT5B;DUSP3;GAREM1;SYAP1;INPP5K
L-amino acid transport (GO:0015807)	5/28	0.00550788	0.0981718	0	0	5.01993	26.1115	SLC1A1;SLC1A4;SLC38A3;SLC25A12;SLC25A22
neutral amino acid transport (GO:0015804)	5/28	0.00550788	0.0981718	0	0	5.01993	26.1115	SLC43A2;SLC6A9;SLC1A1;SLC1A4;SLC38A3
nucleotide-binding oligomerization domain containing signaling pathway (GO:0070423)	5/28	0.00550788	0.0981718	0	0	5.01993	26.1115	UBB;TAB3;TAB1;UBE2V1;MAP2K6
phagosome acidification (GO:0090383)	5/28	0.00550788	0.0981718	0	0	5.01993	26.1115	ATP6V1A;ATP6V1G2;ATP6V1H;ATP6V0D1;ATP6V1D
endocytic recycling (GO:0032456)	7/52	0.0055753	0.0988119	0	0	3.59659	18.6642	SNX4;EHD4;VPS51;EIPR1;VPS50;SNX12;WASHC1
organelle organization (GO:0006996)	29/420	0.00569298	0.0996415	0	0	1.72984	8.9407	ATL2;MIA3;NCKIPSD;STRIP1;ARHGAP21;RHOT1;ATP5F1B;VPS51;CHMP1A;TRAPPC12;KIFAP3;MARK4;PDZD8;WASF3;CLASP1;BCAS3;YTHDF1;DMTN;AGTPBP1;YTHDF3;DST;MTX1;MTX2;VPS13C;RANBP9;DIAPH1;ABI2;CHMP4B;CHMP7
negative regulation of cation transmembrane transport (GO:1904063)	4/18	0.00575277	0.0996415	0	0	6.59277	34.006	CAB39;SLC43A2;ATP1A2;CBARP
presynapse assembly (GO:0099054)	4/18	0.00575277	0.0996415	0	0	6.59277	34.006	PTPRD;NLGN1;DVL1;PTEN
interleukin-1-mediated signaling pathway (GO:0070498)	10/94	0.0057743	0.0996415	0	0	2.75688	14.2099	PSMD8;PSMD6;PSMD12;PSMD4;UBB;PSMD5;PSMD3;TAB3;UBE2V1;TAB1
protein localization to cell periphery (GO:1990778)	13/140	0.00578093	0.0996415	0	0	2.37378	12.2325	C2CD5;ANK2;ANK3;FAM126B;EFR3B;CACNB2;RAP2A;EHD4;PACS2;EPB41L3;WNK3;INPP5K;SPTBN1
ERBB signaling pathway (GO:0038127)	8/66	0.00598735	0.102636	0	0	3.19078	16.3308	GAREM1;ERBB4;GAB1;REPS2;CPNE3;BRAF;STUB1;CBL
regulation of calcium ion transmembrane transporter activity (GO:1901019)	5/29	0.00643105	0.109108	0	0	4.81051	24.2768	CACNB2;CACNB4;HPCA;ANK2;CALM1
negative regulation of cell growth (GO:0030308)	12/126	0.00643449	0.109108	0	0	2.43975	12.3112	DNAJB2;PPP2CA;CDA;STK11;BMPR2;DDX3X;PPP2R1A;SPHK2;GNG4;ULK2;DIP2B;HSPA1B
cellular component assembly (GO:0022607)	20/261	0.0067293	0.110576	0	0	1.92941	9.64953	CYFIP1;YTHDF1;NLGN1;DMTN;YTHDF3;GPAA1;SLC2A1;RANBP9;ANK3;ACTB;NAPG;CD2AP;PPP2R1A;DVL1;REPS2;KIFAP3;KPNA3;SPTBN1;FERMT2;WASF3
regulation of proteolysis (GO:0030162)	7/54	0.00687107	0.110576	0	0	3.44318	17.1485	CYFIP2;TRAF3;CAMK2N1;BAD;STUB1;TRIM32;HDAC6
ESCRT complex disassembly (GO:1904896)	3/10	0.00695748	0.110576	0	0	9.88087	49.0875	VTA1;CHMP1A;CHMP7
ESCRT III complex disassembly (GO:1904903)	3/10	0.00695748	0.110576	0	0	9.88087	49.0875	VTA1;CHMP1A;CHMP7
L-glutamate transmembrane transport (GO:0015813)	3/10	0.00695748	0.110576	0	0	9.88087	49.0875	SLC1A1;SLC25A12;SLC25A22
negative regulation of inclusion body assembly (GO:0090084)	3/10	0.00695748	0.110576	0	0	9.88087	49.0875	DNAJB2;HSPA2;HSPA1B
negative regulation of tyrosine phosphorylation of STAT protein (GO:0042532)	3/10	0.00695748	0.110576	0	0	9.88087	49.0875	PPP2CA;INPP5F;PPP2R1A
presynaptic membrane assembly (GO:0097105)	3/10	0.00695748	0.110576	0	0	9.88087	49.0875	PTPRD;NLGN1;PTEN
protein deneddylation (GO:0000338)	3/10	0.00695748	0.110576	0	0	9.88087	49.0875	COPS6;COPS5;COPS7A
regulation of high voltage-gated calcium channel activity (GO:1901841)	3/10	0.00695748	0.110576	0	0	9.88087	49.0875	CACNB2;SRI;CALM1
diol metabolic process (GO:0034311)	4/19	0.00704982	0.110576	0	0	6.15293	30.4863	GCH1;SPHK2;CALM1;PTS
NLS-bearing protein import into nucleus (GO:0006607)	4/19	0.00704982	0.110576	0	0	6.15293	30.4863	KPNA6;KPNA4;KPNA3;IPO5
nucleotide-sugar biosynthetic process (GO:0009226)	4/19	0.00704982	0.110576	0	0	6.15293	30.4863	GNPDA1;PMM1;GNPDA2;NANS
positive regulation of mitochondrial fission (GO:0090141)	4/19	0.00704982	0.110576	0	0	6.15293	30.4863	RALBP1;SPIRE1;DDHD1;MARCHF5
synaptic transmission, cholinergic (GO:0007271)	4/19	0.00704982	0.110576	0	0	6.15293	30.4863	CHRNB2;ACHE;SLC5A7;CHRNA4
protein-containing complex subunit organization (GO:0043933)	11/112	0.00709359	0.110709	0	0	2.52295	12.485	DMTN;PPP2R1A;GPAA1;SLC2A1;REPS2;RANBP9;KIFAP3;KPNA3;NAPG;WASF3;CD2AP
negative regulation of cell migration (GO:0030336)	13/144	0.00729023	0.113215	0	0	2.30082	11.3228	EPHA4;PTPRU;DUSP3;PTEN;MIA3;RAP2C;AFDN;RAP2A;STK26;SRGAP3;SRGAP1;ARPIN;CLASP1
maintenance of blood-brain barrier (GO:0035633)	5/30	0.00745748	0.113564	0	0	4.61785	22.6207	SLC12A2;GJB6;SLC1A1;WNK3;ACTB
negative regulation of cytoskeleton organization (GO:0051494)	5/30	0.00745748	0.113564	0	0	4.61785	22.6207	HIP1R;CYRIB;ARPIN;CLASP1;KANK4
regulation of catecholamine secretion (GO:0050433)	5/30	0.00745748	0.113564	0	0	4.61785	22.6207	CHRNB2;GRK2;CHRNA4;SYT7;SYT17
regulation of striated muscle contraction (GO:0006942)	5/30	0.00745748	0.113564	0	0	4.61785	22.6207	GRK2;ATP1A2;ANK2;SRI;CALM1
heterophilic cell-cell adhesion via plasma membrane cell adhesion molecules (GO:0007157)	6/42	0.00751593	0.113901	0	0	3.85064	18.8325	PTPRD;NLGN1;CADM1;ADGRL1;NECTIN3;NECTIN1
regulation of peptidyl-serine phosphorylation (GO:0033135)	10/98	0.00771566	0.11597	0	0	2.63101	12.7986	RPTOR;DMTN;DOCK7;PTEN;INPP5K;BRAF;GPD1L;HDAC6;EIF4G1;NCK1
cellular response to insulin stimulus (GO:0032869)	12/129	0.00772643	0.11597	0	0	2.37682	11.5587	ATP6V1A;C2CD5;ATP6V1G2;SYAP1;GAB1;ATP6V1H;INPP5K;AP3S1;ATP6V0D1;ATP6V1D;SLC27A4;APPL1
positive regulation of establishment of protein localization to mitochondrion (GO:1903749)	7/56	0.00837779	0.123648	0	0	3.3023	15.7921	NPEPPS;PPP1R13B;ABLIM3;BAD;UBE2D3;ARIH2;UBE2L3
substantia nigra development (GO:0021762)	6/43	0.00843388	0.123648	0	0	3.74638	17.8908	ATP5PF;MAOB;ATP5PB;SYNGR3;CALM1;ACTB
translation (GO:0006412)	17/214	0.00846927	0.123648	0	0	2.00357	9.55967	NDUFA7;RARS1;IGHMBP2;YARS1;GSPT2;GSPT1;WARS1;GARS1;SARS1;COPS5;NARS1;PPA1;AGO2;EIF4EBP2;DRG2;IARS2;EIF4G1
establishment of protein localization to membrane (GO:0090150)	8/70	0.00851403	0.123648	0	0	2.9843	14.2233	REEP1;RABGEF1;AFDN;ARL6;VPS37C;VPS37A;BRAF;NECTIN3
establishment of epithelial cell polarity (GO:0090162)	4/20	0.00852609	0.123648	0	0	5.76807	27.4827	CAMSAP3;CYTH3;RAP2A;CLASP1
microtubule nucleation (GO:0007020)	4/20	0.00852609	0.123648	0	0	5.76807	27.4827	RANBP9;SLAIN2;TPPP;CLASP1
purine ribonucleoside monophosphate metabolic process (GO:0009167)	4/20	0.00852609	0.123648	0	0	5.76807	27.4827	ADSL;ADSS2;NT5C2;GART
negative regulation of peptidyl-tyrosine phosphorylation (GO:0050732)	5/31	0.00859266	0.123648	0	0	4.44001	21.1205	PPP2CA;DMTN;INPP5F;SEMA4D;PPP2R1A
positive regulation of protein targeting to mitochondrion (GO:1903955)	5/31	0.00859266	0.123648	0	0	4.44001	21.1205	NPEPPS;ABLIM3;UBE2D3;ARIH2;UBE2L3
Wnt signaling pathway, planar cell polarity pathway (GO:0060071)	9/85	0.00887286	0.126474	0	0	2.74019	12.9467	PSMD8;PSMD6;PSMD12;PSMD4;PSMD5;PSMD3;DVL1;DVL2;AP2A1
negative regulation of cell cycle G2/M phase transition (GO:1902750)	7/57	0.00921615	0.126474	0	0	3.23608	15.1669	PSMD8;USP47;PSMD6;PSMD12;PSMD4;PSMD5;PSMD3
protein K48-linked ubiquitination (GO:0070936)	7/57	0.00921615	0.126474	0	0	3.23608	15.1669	RNF126;UBE2H;UBE2D3;ARIH2;UBE3A;TRIM32;UBE2K
positive regulation of cell migration (GO:0030335)	20/269	0.0092519	0.126474	0	0	1.86663	8.7413	RET;SPAG9;CARMIL2;DMTN;BMPR2;SEMA4D;SEMA6D;STAT3;GAB1;MIA3;ELP3;FGF1;HDAC6;AGO2;NUMB;CPNE3;WASHC1;TRIM32;FERMT2;CLASP1
cell proliferation in forebrain (GO:0021846)	3/11	0.00927288	0.126474	0	0	8.64531	40.4658	DOCK7;NUMB;HOOK3
inositol phosphate dephosphorylation (GO:0046855)	3/11	0.00927288	0.126474	0	0	8.64531	40.4658	INPP1;PTEN;INPP5K
phosphorylated carbohydrate dephosphorylation (GO:0046838)	3/11	0.00927288	0.126474	0	0	8.64531	40.4658	INPP1;PTEN;INPP5K
positive regulation of actin nucleation (GO:0051127)	3/11	0.00927288	0.126474	0	0	8.64531	40.4658	CYFIP1;ABI2;WASF3
presynaptic membrane organization (GO:0097090)	3/11	0.00927288	0.126474	0	0	8.64531	40.4658	PTPRD;NLGN1;PTEN
regulation of endocytic recycling (GO:2001135)	3/11	0.00927288	0.126474	0	0	8.64531	40.4658	INPP5F;EIPR1;ATP9A
regulation of inclusion body assembly (GO:0090083)	3/11	0.00927288	0.126474	0	0	8.64531	40.4658	DNAJB2;HSPA2;HSPA1B
tetrahydrobiopterin metabolic process (GO:0046146)	3/11	0.00927288	0.126474	0	0	8.64531	40.4658	GCH1;CALM1;PTS
negative regulation of epidermal growth factor receptor signaling pathway (GO:0042059)	6/44	0.00942952	0.127502	0	0	3.6476	17.0121	RNF126;DUSP3;EPS15L1;STAM;CBL;SNX6
positive regulation of mRNA catabolic process (GO:0061014)	6/44	0.00942952	0.127502	0	0	3.6476	17.0121	UPF1;RIDA;YTHDF1;YTHDF3;AGO2;CPEB3
cellular response to topologically incorrect protein (GO:0035967)	5/32	0.0098419	0.13194	0	0	4.27534	19.7568	DNAJB14;STUB1;HSPA2;HDAC6;HSPA1B
regulation of chemotaxis (GO:0050920)	5/32	0.0098419	0.13194	0	0	4.27534	19.7568	USP14;YTHDF1;DUSP3;MYCBP2;CYRIB
regulation of canonical Wnt signaling pathway (GO:0060828)	19/253	0.00995514	0.132891	0	0	1.88615	8.69453	PTPRU;AMER2;USP8;USP47;PSMD12;DDX3X;PSEN1;PSMD8;PSMD6;STK11;PSMD4;CCNY;PSMD5;WNK2;PSMD3;GID8;DVL1;DVL2;CDK14
cyclic purine nucleotide metabolic process (GO:0052652)	4/21	0.0101907	0.134887	0	0	5.42849	24.8966	GUCY2C;GUCY1B1;ADCY9;ADCY1
negative regulation of microtubule depolymerization (GO:0007026)	4/21	0.0101907	0.134887	0	0	5.42849	24.8966	CAMSAP3;KATNB1;CLASP1;CAMSAP2
ERAD pathway (GO:0036503)	9/87	0.0102747	0.135427	0	0	2.66965	12.2219	DNAJB2;FBXO2;DNAJB14;STUB1;UBXN6;USP19;GET4;UBE2J1;UBQLN2
cellular response to organonitrogen compound (GO:0071417)	10/103	0.0108083	0.141595	0	0	2.48891	11.2684	RPTOR;DIAPH1;GABRB2;LARP1;DMTN;RRAGC;INPP5K;CPEB3;ACTB;IPO5
neurotransmitter transport (GO:0006836)	8/73	0.010878	0.141595	0	0	2.84612	12.8673	SLC5A7;SLC1A1;DVL1;ATP1A2;GLUL;SLC6A3;SLC18A2;PPFIA2
regulation of hydrolase activity (GO:0051336)	8/73	0.010878	0.141595	0	0	2.84612	12.8673	EPHA4;RALBP1;PLXNA1;RAP1GAP;PLXNA4;TBC1D15;TBC1D10B;ARHGAP12
regulation of establishment of planar polarity (GO:0090175)	9/88	0.011035	0.143045	0	0	2.63572	11.8783	PSMD8;PSMD6;PSMD12;PSMD4;PSMD5;PSMD3;DVL1;DVL2;AP2A1
transmembrane receptor protein tyrosine kinase signaling pathway (GO:0007169)	27/404	0.0111833	0.143755	0	0	1.66745	7.4924	CYFIP2;RET;ATP6V1A;CYFIP1;SDC2;AP2A1;PSEN1;FGF1;CBL;ACTB;TIAL1;UBASH3B;ERBB4;ATP6V1H;AP3S1;ANKS1A;ATP6V1D;APPL1;NCK1;EPHA4;ATP6V1G2;STAT3;GAB1;ARPC4;FRS3;COL4A2;ATP6V0D1
cellular response to amino acid starvation (GO:0034198)	8/74	0.0117644	0.143755	0	0	2.80285	12.4521	RPTOR;ATP6V1A;ATP6V1G2;RRAGC;CASTOR2;ATP6V1H;ATP6V0D1;ATP6V1D
SCF-dependent proteasomal ubiquitin-dependent protein catabolic process (GO:0031146)	9/89	0.0118368	0.143755	0	0	2.60264	11.5467	PSMD8;PSMD6;PSMD12;PSMD4;PSMD5;FBXO2;PSMD3;CUL2;FBXL17
brain morphogenesis (GO:0048854)	3/12	0.0119852	0.143755	0	0	7.68432	33.9961	VPS51;PTEN;CTNNA2
catecholamine biosynthetic process (GO:0042423)	3/12	0.0119852	0.143755	0	0	7.68432	33.9961	DDC;GCH1;TH
early endosome to Golgi transport (GO:0034498)	3/12	0.0119852	0.143755	0	0	7.68432	33.9961	SNX1;SNX2;TRAPPC10
energy coupled proton transport, down electrochemical gradient (GO:0015985)	3/12	0.0119852	0.143755	0	0	7.68432	33.9961	ATP5F1A;ATP5PB;ATP5F1C
exit from mitosis (GO:0010458)	3/12	0.0119852	0.143755	0	0	7.68432	33.9961	CHMP4B;CHMP7;CLASP1
eye photoreceptor cell differentiation (GO:0001754)	3/12	0.0119852	0.143755	0	0	7.68432	33.9961	AGTPBP1;TH;STAT3
Golgi localization (GO:0051645)	3/12	0.0119852	0.143755	0	0	7.68432	33.9961	ARHGAP21;UVRAG;HOOK3
inositol phosphate catabolic process (GO:0071545)	3/12	0.0119852	0.143755	0	0	7.68432	33.9961	INPP1;PTEN;INPP5K
mitochondrial electron transport, ubiquinol to cytochrome c (GO:0006122)	3/12	0.0119852	0.143755	0	0	7.68432	33.9961	UQCR11;CYC1;UQCR10
negative regulation of heart contraction (GO:0045822)	3/12	0.0119852	0.143755	0	0	7.68432	33.9961	GRK2;ATP1A2;SRI
negative regulation of receptor internalization (GO:0002091)	3/12	0.0119852	0.143755	0	0	7.68432	33.9961	ATXN2;WDR54;UBQLN2
P-body assembly (GO:0033962)	3/12	0.0119852	0.143755	0	0	7.68432	33.9961	DDX6;ATXN2;LSM3
positive regulation of sodium ion transmembrane transport (GO:1902307)	3/12	0.0119852	0.143755	0	0	7.68432	33.9961	WNK2;WNK3;ANK3
purine nucleoside monophosphate biosynthetic process (GO:0009127)	3/12	0.0119852	0.143755	0	0	7.68432	33.9961	ADSL;ADSS2;GART
regulation of sequestering of calcium ion (GO:0051282)	3/12	0.0119852	0.143755	0	0	7.68432	33.9961	DIAPH1;UBASH3B;ANK2
cellular response to osmotic stress (GO:0071470)	4/22	0.0120521	0.143755	0	0	5.12664	22.6521	DDX3X;CAB39;WNK3;SERPINB6
negative regulation of cyclin-dependent protein kinase activity (GO:1904030)	4/22	0.0120521	0.143755	0	0	5.12664	22.6521	CAMK2N1;PTEN;IPO7;IPO5
ubiquitin-dependent protein catabolic process via the multivesicular body sorting pathway (GO:0043162)	4/22	0.0120521	0.143755	0	0	5.12664	22.6521	RNF126;VPS37C;VPS37A;STAM
regulation of mitotic cell cycle phase transition (GO:1901990)	15/188	0.0124175	0.147552	0	0	2.01073	8.8244	PSMD12;CETN2;CKAP5;TUBB4A;PSMD8;PSMD6;PSMD4;UBB;PPP2R1A;PSMD5;CDC26;HECW2;PSMD3;CLASP1;APPL1
mitochondrial respiratory chain complex assembly (GO:0033108)	9/90	0.0126812	0.147588	0	0	2.57037	11.2264	NDUFB9;NDUFA8;NDUFA7;NDUFS8;NDUFB10;NDUFA12;NDUFB11;NDUFB1;NDUFV1
negative regulation of protein kinase activity (GO:0006469)	9/90	0.0126812	0.147588	0	0	2.57037	11.2264	DUSP3;UBASH3B;CAMK2N1;CAMK2N2;AKT1S1;DVL1;INPP5K;TAB1;WARS1
negative regulation of translation (GO:0017148)	9/90	0.0126812	0.147588	0	0	2.57037	11.2264	DDX6;RIDA;YTHDF1;DDX3X;LARP1;YTHDF3;AGO2;EIF4EBP2;CPEB3
regulation of transcription from RNA polymerase II promoter in response to hypoxia (GO:0061418)	8/75	0.0127028	0.147588	0	0	2.76087	12.0538	PSMD8;PSMD6;PSMD12;PSMD4;UBB;PSMD5;PSMD3;CUL2
cellular response to amino acid stimulus (GO:0071230)	5/34	0.0127029	0.147588	0	0	3.98008	17.3767	RPTOR;RRAGC;CASTOR2;CPEB3;IPO5
synaptic vesicle recycling (GO:0036465)	5/34	0.0127029	0.147588	0	0	3.98008	17.3767	NLGN1;TBC1D24;SNCG;RAB5A;SYT7
regulation of synapse assembly (GO:0051963)	6/47	0.0129157	0.149324	0	0	3.38017	14.7014	ROBO2;CHRNB2;PTPRD;NLGN1;PDLIM5;EIF4G1
plasma membrane bounded cell projection assembly (GO:0120031)	20/278	0.0129475	0.149324	0	0	1.80066	7.8272	IQCB1;CYFIP1;DMTN;ARL6;SEPTIN6;SEPTIN7;HDAC6;CD2AP;WDR11;RAP2C;RAP2A;ABLIM1;EHD4;ABLIM3;RP2;STK26;S1PR1;INPP5K;ATP6V0D1;ATP6V1D
protein localization to nucleus (GO:0034504)	10/106	0.0130686	0.150169	0	0	2.41075	10.4567	IPO9;CSE1L;DVL1;STAT3;TNPO1;IPO7;TNPO2;TNPO3;IPO5;APPL1
regulation of endocytosis (GO:0030100)	7/61	0.0131903	0.151014	0	0	2.99575	12.9664	LRSAM1;RAB5B;RAB5C;SNX12;HIP1R;ABL2;RAB5A
cell morphogenesis involved in neuron differentiation (GO:0048667)	8/76	0.013695	0.155656	0	0	2.72013	11.6713	PLPPR4;SDC2;DOCK7;DVL1;ANK3;CTNNA2;S100B;ACTB
cellular response to hormone stimulus (GO:0032870)	8/76	0.013695	0.155656	0	0	2.72013	11.6713	ROBO2;BCAS3;STAT5B;STAT3;SRA1;INPP5K;ATP1A2;UBE2L3
anterograde trans-synaptic signaling (GO:0098916)	18/244	0.0140827	0.158171	0	0	1.84865	7.88043	CHRNB2;GABRB2;NLGN1;DTNA;CHRNA4;CHRM4;CPNE6;SLC1A1;GRM1;CACNB2;CACNB4;SYPL1;RPS6KA1;KCNQ2;SNCG;SLC12A6;CALM1;SLC18A2
negative regulation of intracellular protein transport (GO:0090317)	4/23	0.0141179	0.158171	0	0	4.85656	20.6905	BAG4;DMTN;INPP5K;RANGAP1
positive regulation of protein autophosphorylation (GO:0031954)	4/23	0.0141179	0.158171	0	0	4.85656	20.6905	RAP2C;RAP2A;DDX3X;CALM1
regulation of release of sequestered calcium ion into cytosol by sarcoplasmic reticulum (GO:0010880)	4/23	0.0141179	0.158171	0	0	4.85656	20.6905	ANK2;ATP1A2;SRI;CALM1
non-canonical Wnt signaling pathway (GO:0035567)	11/124	0.0146435	0.162828	0	0	2.2536	9.51868	PSMD8;PSMD6;PSMD12;PSMD4;PSMD5;PSMD3;DVL1;AGO2;DVL2;AP2A1;CALM1
cellular biogenic amine metabolic process (GO:0006576)	3/13	0.0151046	0.162828	0	0	6.91552	28.9951	DDC;SMS;SRM
central nervous system neuron axonogenesis (GO:0021955)	3/13	0.0151046	0.162828	0	0	6.91552	28.9951	CHRNB2;MYCBP2;PTEN
central nervous system projection neuron axonogenesis (GO:0021952)	3/13	0.0151046	0.162828	0	0	6.91552	28.9951	CHRNB2;EPHA4;MYCBP2
intracellular sterol transport (GO:0032366)	3/13	0.0151046	0.162828	0	0	6.91552	28.9951	OSBPL2;OSBP;RELCH
polyamine metabolic process (GO:0006595)	3/13	0.0151046	0.162828	0	0	6.91552	28.9951	SMS;HDAC6;SRM
positive regulation of protein acetylation (GO:1901985)	3/13	0.0151046	0.162828	0	0	6.91552	28.9951	DDX3X;DIP2A;DIP2B
positive regulation of transporter activity (GO:0032411)	3/13	0.0151046	0.162828	0	0	6.91552	28.9951	TRPC6;WNK3;SYNGR3
pteridine-containing compound metabolic process (GO:0042558)	3/13	0.0151046	0.162828	0	0	6.91552	28.9951	GCH1;CALM1;PTS
regulation of cell communication by electrical coupling (GO:0010649)	3/13	0.0151046	0.162828	0	0	6.91552	28.9951	ANK3;SRI;CALM1
regulation of response to stress (GO:0080134)	3/13	0.0151046	0.162828	0	0	6.91552	28.9951	MLC1;CORO2B;EIF4G1
mitotic cytokinesis (GO:0000281)	6/49	0.0156878	0.163762	0	0	3.22262	13.3895	USP8;CHMP4B;SEPTIN6;ANK3;SPTBN1;CIT
antigen processing and presentation of exogenous peptide antigen via MHC class I (GO:0042590)	8/78	0.0158469	0.163762	0	0	2.64213	10.9511	PSMD8;MFSD6;PSMD6;PSMD12;ITGB5;PSMD4;PSMD5;PSMD3
AMP biosynthetic process (GO:0006167)	2/5	0.0159681	0.163762	0	0	15.355	63.526	ADSL;ADSS2
catechol-containing compound biosynthetic process (GO:0009713)	2/5	0.0159681	0.163762	0	0	15.355	63.526	DDC;TH
cerebellar Purkinje cell differentiation (GO:0021702)	2/5	0.0159681	0.163762	0	0	15.355	63.526	AGTPBP1;FAIM2
dopamine biosynthetic process (GO:0042416)	2/5	0.0159681	0.163762	0	0	15.355	63.526	GCH1;TH
L-aspartate transmembrane transport (GO:0070778)	2/5	0.0159681	0.163762	0	0	15.355	63.526	SLC1A1;SLC1A4
negative regulation of anion transmembrane transport (GO:1903960)	2/5	0.0159681	0.163762	0	0	15.355	63.526	SLC43A2;GOPC
negative regulation of hydrogen peroxide metabolic process (GO:0010727)	2/5	0.0159681	0.163762	0	0	15.355	63.526	MPV17L;HDAC6
positive regulation of protein monoubiquitination (GO:1902527)	2/5	0.0159681	0.163762	0	0	15.355	63.526	UBB;PDCD6
regulation of cytochrome-c oxidase activity (GO:1904959)	2/5	0.0159681	0.163762	0	0	15.355	63.526	NDUFA4;SPHK2
regulation of phosphatidylinositol dephosphorylation (GO:0060304)	2/5	0.0159681	0.163762	0	0	15.355	63.526	MTMR1;MTMR9
regulation of protein monoubiquitination (GO:1902525)	2/5	0.0159681	0.163762	0	0	15.355	63.526	UBB;PDCD6
axonal transport (GO:0098930)	5/36	0.0160787	0.163762	0	0	3.72291	15.3766	DST;AP3D1;AP3S1;KIF1A;AP3B2
establishment of protein localization to plasma membrane (GO:0061951)	5/36	0.0160787	0.163762	0	0	3.72291	15.3766	AFDN;GGA3;ANK3;NECTIN3;SPTBN1
regulation of sodium ion transport (GO:0002028)	5/36	0.0160787	0.163762	0	0	3.72291	15.3766	AHCYL1;WNK2;WNK3;ANK3;GPD1L
transferrin transport (GO:0033572)	5/36	0.0160787	0.163762	0	0	3.72291	15.3766	ATP6V1A;ATP6V1G2;ATP6V1H;ATP6V0D1;ATP6V1D
phosphate-containing compound metabolic process (GO:0006796)	16/212	0.0163576	0.164315	0	0	1.89312	7.78652	TIGAR;DUSP3;PLPPR1;SPHK2;INPP1;PLPPR3;AGK;PLPPR4;STAT3;PTEN;AGPAT1;PGM2L1;PTPRD;PPA1;INPP5K;CALM1
negative regulation of protein depolymerization (GO:1901880)	4/24	0.0163948	0.164315	0	0	4.61349	18.9651	CAMSAP3;KATNB1;CLASP1;CAMSAP2
neuromuscular junction development (GO:0007528)	4/24	0.0163948	0.164315	0	0	4.61349	18.9651	CACNB2;CACNB4;DVL1;ANK3
purine nucleotide metabolic process (GO:0006163)	4/24	0.0163948	0.164315	0	0	4.61349	18.9651	ADSL;GUK1;NT5C2;GART
regulation of cell size (GO:0008361)	4/24	0.0163948	0.164315	0	0	4.61349	18.9651	RAP1GAP2;RPTOR;AKT1S1;PTEN
positive regulation of developmental process (GO:0051094)	14/177	0.016478	0.164623	0	0	1.99044	8.1722	RALBP1;NLGN1;BMPR2;PSEN1;DDHD1;RPS6KA1;DVL1;AGO2;DVL2;SPIRE1;ADGRL1;CPEB3;CLASP1;MARCHF5
regulation of protein kinase activity (GO:0045859)	10/110	0.0166123	0.165437	0	0	2.31383	9.4812	RAP2C;UVRAG;UBASH3B;CAMK2N1;CAMK2N2;DVL1;AKT1S1;INPP5K;TAB1;WARS1
pre-replicative complex assembly (GO:0036388)	7/64	0.0168857	0.167628	0	0	2.83763	11.5812	PSMD8;PSMD6;PSMD12;PSMD4;UBB;PSMD5;PSMD3
axon development (GO:0061564)	8/79	0.01701	0.168329	0	0	2.60478	10.6118	PLPPR4;DOCK7;ANK3;CTNNA2;S100B;MAPK8IP3;ACTB;CAMSAP2
negative regulation of ERK1 and ERK2 cascade (GO:0070373)	6/50	0.0172173	0.169845	0	0	3.14921	12.7916	SPRED3;DUSP3;CAMK2N1;WNK2;PTEN;RANBP9
Fc-epsilon receptor signaling pathway (GO:0038095)	10/111	0.0175997	0.173073	0	0	2.29081	9.25456	PSMD8;MAP2K4;PSMD6;PSMD12;PSMD4;PSMD5;PSMD3;TAB3;TAB1;CALM1
anterograde axonal transport (GO:0008089)	5/37	0.0179705	0.17318	0	0	3.60638	14.4941	AP3D1;AP3S1;KIF1A;AP3B2;MAPK8IP3
phagosome maturation (GO:0090382)	5/37	0.0179705	0.17318	0	0	3.60638	14.4941	ATP6V1A;ATP6V1G2;ATP6V1H;ATP6V0D1;ATP6V1D
positive regulation of calcium ion transport (GO:0051928)	5/37	0.0179705	0.17318	0	0	3.60638	14.4941	CACNB2;TRPC6;SPHK2;WNK3;ANK2
positive regulation of exocytosis (GO:0045921)	5/37	0.0179705	0.17318	0	0	3.60638	14.4941	CADPS2;RAB2B;STAM;RAB5A;CLASP1
positive regulation of myeloid cell differentiation (GO:0045639)	5/37	0.0179705	0.17318	0	0	3.60638	14.4941	STAT5B;STAT1;PITHD1;STAT3;HSPA1B
proton transmembrane transport (GO:1902600)	5/37	0.0179705	0.17318	0	0	3.60638	14.4941	ATP6V1A;ATP5F1B;ATP6V1H;ATP1A2;ATP6V0D1
protein stabilization (GO:0050821)	14/179	0.017997	0.17318	0	0	1.9661	7.89892	EPHA4;USP9X;PTEN;HIP1R;MTMR9;ANK2;NAPG;USP19;CCT6A;BAG4;DVL1;ZNF207;CCT8;HSPA1B
Fc receptor signaling pathway (GO:0038093)	10/112	0.0186297	0.173259	0	0	2.26823	9.03435	PSMD8;MAP2K4;PSMD6;PSMD12;PSMD4;PSMD5;PSMD3;TAB3;TAB1;CALM1
C4-dicarboxylate transport (GO:0015740)	3/14	0.0186379	0.173259	0	0	6.28651	25.0364	SLC1A1;SLC25A12;SLC25A22
COPII-coated vesicle cargo loading (GO:0090110)	3/14	0.0186379	0.173259	0	0	6.28651	25.0364	SEC23A;SEC24A;MIA3
microvillus organization (GO:0032528)	3/14	0.0186379	0.173259	0	0	6.28651	25.0364	RAP2C;RAP2A;STK26
negative regulation of translational initiation (GO:0045947)	3/14	0.0186379	0.173259	0	0	6.28651	25.0364	LARP1;AGO2;EIF4EBP2
neurotransmitter biosynthetic process (GO:0042136)	3/14	0.0186379	0.173259	0	0	6.28651	25.0364	ACHE;SLC5A7;SLC6A3
peptidyl-serine dephosphorylation (GO:0070262)	3/14	0.0186379	0.173259	0	0	6.28651	25.0364	PPP2CA;PPTC7;NCK1
positive regulation of sodium ion transmembrane transporter activity (GO:2000651)	3/14	0.0186379	0.173259	0	0	6.28651	25.0364	WNK2;WNK3;ANK3
ribonucleoside monophosphate biosynthetic process (GO:0009156)	3/14	0.0186379	0.173259	0	0	6.28651	25.0364	ADSL;ADSS2;GART
tRNA wobble uridine modification (GO:0002098)	3/14	0.0186379	0.173259	0	0	6.28651	25.0364	CTU2;ELP1;ELP3
regulation of cellular amine metabolic process (GO:0033238)	6/51	0.0188462	0.173259	0	0	3.07907	12.2283	PSMD8;PSMD6;PSMD12;PSMD4;PSMD5;PSMD3
protein quality control for misfolded or incompletely synthesized proteins (GO:0006515)	4/25	0.0188889	0.173259	0	0	4.39357	17.4389	ZER1;FBXL17;STUB1;HDAC6
receptor signaling pathway via STAT (GO:0097696)	4/25	0.0188889	0.173259	0	0	4.39357	17.4389	STAT5B;STAT1;STAT2;STAT3
regulation of dopamine secretion (GO:0014059)	4/25	0.0188889	0.173259	0	0	4.39357	17.4389	CHRNB2;CHRNA4;SYT7;SYT17
regulation of microtubule depolymerization (GO:0031114)	4/25	0.0188889	0.173259	0	0	4.39357	17.4389	CAMSAP3;KATNB1;CLASP1;CAMSAP2
regulation of proteolysis involved in cellular protein catabolic process (GO:1903050)	4/25	0.0188889	0.173259	0	0	4.39357	17.4389	USP14;EPHA4;UBB;UBE3A
regulation of signal transduction (GO:0009966)	15/198	0.0190744	0.17445	0	0	1.89986	7.52231	MTCH1;ITGA3;FBXL17;WDR11;PPP2CA;RGS3;GRK2;UBASH3B;PPP2R1A;CASTOR2;GNG4;DGKQ;RGS20;RGS6;NCK1
positive regulation of cellular amide metabolic process (GO:0034250)	8/81	0.0195181	0.177989	0	0	2.53315	9.97154	EPHA4;YTHDF1;DDX3X;YTHDF3;SPHK2;PYM1;CPEB3;ELAVL1
cellular response to nutrient levels (GO:0031669)	7/66	0.0197218	0.178807	0	0	2.74115	10.7618	RPTOR;BMPR2;RRAGC;STK26;VPS41;ZFYVE1;EIF4G1
negative regulation of G2/M transition of mitotic cell cycle (GO:0010972)	7/66	0.0197218	0.178807	0	0	2.74115	10.7618	PSMD8;USP47;PSMD6;PSMD12;PSMD4;PSMD5;PSMD3
regulation of cell growth (GO:0001558)	16/217	0.0199247	0.179803	0	0	1.84554	7.22675	CDA;USP47;BMPR2;DDX3X;SPHK2;RAB33B;RPTOR;PPP2CA;DNAJB2;STK11;PPP2R1A;GNG4;RPS6KA1;TRIM32;HSPA1B;EIF4G1
mRNA destabilization (GO:0061157)	5/38	0.0200036	0.179803	0	0	3.49691	13.6794	UPF1;RIDA;YTHDF1;YTHDF3;CPEB3
regulation of phosphoprotein phosphatase activity (GO:0043666)	5/38	0.0200036	0.179803	0	0	3.49691	13.6794	PTPA;PPP4R4;PPP6R2;PPP6R3;CALM1
positive regulation of canonical Wnt signaling pathway (GO:0090263)	11/130	0.0201609	0.1807	0	0	2.1393	8.35186	PSMD8;USP8;USP47;PSMD6;PSMD12;DDX3X;PSMD4;PSMD5;WNK2;PSMD3;GID8
regulation of exocytosis (GO:0017157)	6/52	0.0205772	0.183905	0	0	3.01197	11.6972	CADPS2;RAB2B;SEPTIN5;RAB5A;CLASP1;STXBP5L
positive regulation of intracellular protein transport (GO:0090316)	12/148	0.0212155	0.187374	0	0	2.04272	7.87066	NPEPPS;BCAS3;C2CD5;PPP1R13B;ABLIM3;BAD;UBE2D3;ARIH2;ANK3;PSEN1;IPO5;UBE2L3
regulation of epidermal growth factor receptor signaling pathway (GO:0042058)	7/67	0.0212577	0.187374	0	0	2.69532	10.3798	RNF126;DUSP3;HIP1R;EPS15L1;STAM;CBL;WDR54
negative regulation of cellular process (GO:0048523)	34/566	0.0215437	0.187374	0	0	1.48862	5.71283	CDA;PTPRU;ATP8A2;BMPR2;PPP1R13B;DDX3X;SMYD5;ADAM22;PTEN;MIA3;DNAJB2;PPP2CA;STK11;PPP2R1A;CAMK2N1;ERBB4;GNG4;CHMP1A;PLXNA1;WDR6;PLXNA4;NCK1;MARCHF5;SEMA4D;SPHK2;VPS13C;GLMN;PPP2R5C;WARS1;WNK2;CHMP4B;FERMT2;HSPA1B;GSDME
chaperone cofactor-dependent protein refolding (GO:0051085)	4/26	0.0216053	0.187374	0	0	4.19365	16.0819	DNAJB4;DNAJB14;HSPA2;HSPA1B
negative regulation of protein localization to membrane (GO:1905476)	4/26	0.0216053	0.187374	0	0	4.19365	16.0819	DMTN;NUMB;INPP5K;PPP2R5A
negative regulation of receptor-mediated endocytosis (GO:0048261)	4/26	0.0216053	0.187374	0	0	4.19365	16.0819	ATXN2;PSEN1;WDR54;UBQLN2
regulation of synapse organization (GO:0050807)	4/26	0.0216053	0.187374	0	0	4.19365	16.0819	CHRNB2;EPHA4;CTNNA2;PDLIM5
TOR signaling (GO:0031929)	4/26	0.0216053	0.187374	0	0	4.19365	16.0819	RPTOR;LARP1;SYAP1;EIF4EBP2
regulation of G2/M transition of mitotic cell cycle (GO:0010389)	12/149	0.0222331	0.187374	0	0	2.02771	7.71779	PSMD8;USP47;PSMD6;PSMD12;PSMD4;PPP2R1A;PSMD5;CETN2;PSMD3;CKAP5;TUBB4A;CLASP1
positive regulation of plasma membrane bounded cell projection assembly (GO:0120034)	8/83	0.022279	0.187374	0	0	2.46534	9.37843	CYFIP1;BCAS3;NLGN1;CARMIL2;ABI2;CDC42EP4;MARK4;WASHC1
anterograde synaptic vesicle transport (GO:0048490)	3/15	0.0225887	0.187374	0	0	5.76233	21.841	AP3D1;AP3S1;AP3B2
contractile actin filament bundle assembly (GO:0030038)	3/15	0.0225887	0.187374	0	0	5.76233	21.841	ITGB5;ZYX;PHACTR1
endoplasmic reticulum tubular network organization (GO:0071786)	3/15	0.0225887	0.187374	0	0	5.76233	21.841	REEP1;ATL2;REEP2
glucan catabolic process (GO:0009251)	3/15	0.0225887	0.187374	0	0	5.76233	21.841	PYGM;CALM1;PGM2L1
glycogen catabolic process (GO:0005980)	3/15	0.0225887	0.187374	0	0	5.76233	21.841	PYGM;CALM1;PGM2L1
intracellular cholesterol transport (GO:0032367)	3/15	0.0225887	0.187374	0	0	5.76233	21.841	OSBPL2;OSBP;RELCH
microvillus assembly (GO:0030033)	3/15	0.0225887	0.187374	0	0	5.76233	21.841	RAP2C;RAP2A;STK26
regulation of amyloid fibril formation (GO:1905906)	3/15	0.0225887	0.187374	0	0	5.76233	21.841	VBP1;PSEN1;PFDN6
regulation of clathrin-dependent endocytosis (GO:2000369)	3/15	0.0225887	0.187374	0	0	5.76233	21.841	HIP1R;SMAP1;UBQLN2
regulation of dephosphorylation (GO:0035303)	3/15	0.0225887	0.187374	0	0	5.76233	21.841	MTMR1;MTMR9;INPP5K
regulation of synaptic transmission, GABAergic (GO:0032228)	3/15	0.0225887	0.187374	0	0	5.76233	21.841	USP46;NLGN1;CNTNAP4
stress fiber assembly (GO:0043149)	3/15	0.0225887	0.187374	0	0	5.76233	21.841	ITGB5;ZYX;PHACTR1
synaptic vesicle transport along microtubule (GO:0099517)	3/15	0.0225887	0.187374	0	0	5.76233	21.841	AP3D1;AP3S1;AP3B2
ion transport (GO:0006811)	10/116	0.0231954	0.187374	0	0	2.18218	8.21327	CHRNB2;SLC12A2;TRPC6;SLC24A3;SLC9A7;CHRNA4;SLC1A1;KCNN3;SLC12A6;SLC25A22
tumor necrosis factor-mediated signaling pathway (GO:0033209)	10/116	0.0231954	0.187374	0	0	2.18218	8.21327	PSMD8;PSMD6;PSMD12;BAG4;PSMD4;PSMD5;TRAF3;STAT1;PSMD3;CDIP1
axon guidance (GO:0007411)	15/203	0.023283	0.187374	0	0	1.84884	6.95171	RET;ROBO2;CYFIP1;EPHA4;SEMA4D;SEMA6D;GAB1;RANBP9;SPTB;RAP1GAP;ENAH;DAB1;PLXNA1;SPTBN1;PLXNA4
adherens junction maintenance (GO:0034334)	2/6	0.0232949	0.187374	0	0	11.5156	43.2932	CAMSAP3;FERMT2
ATP synthesis coupled electron transport (GO:0042773)	2/6	0.0232949	0.187374	0	0	11.5156	43.2932	NDUFA12;NDUFV1
attachment of GPI anchor to protein (GO:0016255)	2/6	0.0232949	0.187374	0	0	11.5156	43.2932	PIGT;GPAA1
establishment of mitochondrion localization, microtubule-mediated (GO:0034643)	2/6	0.0232949	0.187374	0	0	11.5156	43.2932	RHOT1;UBB
GDP-mannose metabolic process (GO:0019673)	2/6	0.0232949	0.187374	0	0	11.5156	43.2932	GMDS;PMM1
N-acetylneuraminate catabolic process (GO:0019262)	2/6	0.0232949	0.187374	0	0	11.5156	43.2932	GNPDA1;GNPDA2
negative regulation of cell size (GO:0045792)	2/6	0.0232949	0.187374	0	0	11.5156	43.2932	AKT1S1;PTEN
negative regulation of protein targeting to membrane (GO:0090315)	2/6	0.0232949	0.187374	0	0	11.5156	43.2932	DMTN;INPP5K
positive regulation of focal adhesion disassembly (GO:0120183)	2/6	0.0232949	0.187374	0	0	11.5156	43.2932	DUSP3;IQSEC1
positive regulation of ion transmembrane transport (GO:0034767)	2/6	0.0232949	0.187374	0	0	11.5156	43.2932	TRPC6;WNK3
prepulse inhibition (GO:0060134)	2/6	0.0232949	0.187374	0	0	11.5156	43.2932	PTEN;CTNNA2
regulation of focal adhesion disassembly (GO:0120182)	2/6	0.0232949	0.187374	0	0	11.5156	43.2932	DUSP3;IQSEC1
regulation of retrograde transport, endosome to Golgi (GO:1905279)	2/6	0.0232949	0.187374	0	0	11.5156	43.2932	EIPR1;ATP9A
regulation of cell motility (GO:2000145)	11/133	0.0234341	0.188012	0	0	2.08637	7.83132	CAMSAP3;DIAPH1;INPP5F;ERBB4;ABL2;PLXNA1;FGF1;PHPT1;CYRIB;TRIM32;PLXNA4
positive regulation of translation (GO:0045727)	9/100	0.0237527	0.189641	0	0	2.28671	8.55244	YTHDF1;LARP1;DDX3X;YTHDF3;AGO2;HABP4;PYM1;CPEB3;ELAVL1
anaphase-promoting complex-dependent catabolic process (GO:0031145)	8/84	0.023758	0.189641	0	0	2.43278	9.09818	PSMD8;PSMD6;PSMD12;PSMD4;UBB;PSMD5;CDC26;PSMD3
regulation of cellular amino acid metabolic process (GO:0006521)	6/54	0.0243556	0.191767	0	0	2.88617	10.7221	PSMD8;PSMD6;PSMD12;PSMD4;PSMD5;PSMD3
negative regulation of ERBB signaling pathway (GO:1901185)	5/40	0.0245075	0.191767	0	0	3.29674	12.2269	RNF126;DUSP3;EPS15L1;STAM;CBL
positive regulation of intrinsic apoptotic signaling pathway (GO:2001244)	5/40	0.0245075	0.191767	0	0	3.29674	12.2269	BCAP31;UBB;BAD;NCK1;GSDME
regulation of sodium ion transmembrane transporter activity (GO:2000649)	5/40	0.0245075	0.191767	0	0	3.29674	12.2269	HECW2;WNK2;WNK3;ANK3;GPD1L
microtubule polymerization or depolymerization (GO:0031109)	4/27	0.0245485	0.191767	0	0	4.01111	14.8696	ZNF207;KATNB1;TPPP;CKAP5
negative regulation of cation channel activity (GO:2001258)	4/27	0.0245485	0.191767	0	0	4.01111	14.8696	SLC6A9;SRI;CALM1;CBARP
positive regulation of erythrocyte differentiation (GO:0045648)	4/27	0.0245485	0.191767	0	0	4.01111	14.8696	STAT5B;STAT1;STAT3;HSPA1B
negative regulation of cellular catabolic process (GO:0031330)	7/69	0.0245745	0.191767	0	0	2.60811	9.66576	STAT3;WDR6;MTMR9;TAB3;WASHC1;EIF4G3;EIF4G1
positive regulation of protein polymerization (GO:0032273)	7/69	0.0245745	0.191767	0	0	2.60811	9.66576	FCHSD1;CTTN;CDC42EP4;SLAIN2;TPPP;CLASP1;NCK1
positive regulation of cell growth (GO:0030307)	9/102	0.0266034	0.20447	0	0	2.2373	8.11406	RPTOR;USP47;DDX3X;SEMA4D;CPNE6;RPS6KA1;TRIM32;EIF4G1;SYT17
regulation of neuron death (GO:1901214)	8/86	0.0269199	0.20447	0	0	2.37015	8.56783	C1QA;UBB;AKT1S1;RRAS2;CHMP4B;SNCG;FAIM2;EIF4G1
cellular polysaccharide catabolic process (GO:0044247)	3/16	0.0269578	0.20447	0	0	5.3188	19.2194	PYGM;CALM1;PGM2L1
N-acetylglucosamine metabolic process (GO:0006044)	3/16	0.0269578	0.20447	0	0	5.3188	19.2194	GNPDA1;GNPDA2;OGA
negative regulation of receptor signaling pathway via JAK-STAT (GO:0046426)	3/16	0.0269578	0.20447	0	0	5.3188	19.2194	PPP2CA;INPP5F;PPP2R1A
protein localization to endoplasmic reticulum (GO:0070972)	3/16	0.0269578	0.20447	0	0	5.3188	19.2194	BCAP31;ANK2;MIA3
purine ribonucleoside monophosphate biosynthetic process (GO:0009168)	3/16	0.0269578	0.20447	0	0	5.3188	19.2194	ADSL;ADSS2;GART
regulation of defense response to virus (GO:0050688)	3/16	0.0269578	0.20447	0	0	5.3188	19.2194	TRAF3;PCBP2;ZMPSTE24
retrograde axonal transport (GO:0008090)	3/16	0.0269578	0.20447	0	0	5.3188	19.2194	DST;KIF1A;ACTR10
transepithelial transport (GO:0070633)	3/16	0.0269578	0.20447	0	0	5.3188	19.2194	SLC12A2;SLC1A1;ABCG2
JNK cascade (GO:0007254)	5/41	0.0269846	0.20447	0	0	3.205	11.578	MAP2K4;UBB;TAB3;TAB1;UBE2V1
regulation of protein dephosphorylation (GO:0035304)	5/41	0.0269846	0.20447	0	0	3.205	11.578	PTPA;PPP6R2;PPP6R3;PPP2R5A;CALM1
regulation of GTPase activity (GO:0043087)	14/189	0.0272354	0.205873	0	0	1.85278	6.67601	EPHA4;BCAS3;RALBP1;SEMA4D;RAP1GAP;ARHGAP12;AFDN;PLXNA1;RAB11FIP2;RGS6;PLXNA4;TBC1D15;FERMT2;TBC1D10B
regulation of intracellular signal transduction (GO:1902531)	27/437	0.0276972	0.206075	0	0	1.53055	5.48919	NLGN1;TRIO;PPP1R13B;RASGRF2;PTEN;ARHGAP5;FGF1;ARHGAP6;ARHGAP12;ABR;ARHGAP21;PIDD1;STK11;RHOT1;LBH;SRGAP3;SRGAP1;MAP2K6;RALBP1;ARHGEF12;SPHK2;PPP2R5C;WDR54;BCR;RRAGC;CASTOR2;TRAF3
cellular response to acid chemical (GO:0071229)	4/28	0.0277219	0.206075	0	0	3.84378	13.782	RPTOR;RRAGC;CPEB3;IPO5
glycogen metabolic process (GO:0005977)	4/28	0.0277219	0.206075	0	0	3.84378	13.782	GBE1;PYGM;CALM1;PGM2L1
negative regulation of calcium ion transmembrane transporter activity (GO:1901020)	4/28	0.0277219	0.206075	0	0	3.84378	13.782	ATP1A2;SRI;CALM1;CBARP
positive regulation of microtubule polymerization (GO:0031116)	4/28	0.0277219	0.206075	0	0	3.84378	13.782	SLAIN2;CKAP5;CLASP1;HSPA1B
regulation of microtubule polymerization or depolymerization (GO:0031110)	4/28	0.0277219	0.206075	0	0	3.84378	13.782	CAMSAP3;PRUNE1;CLASP1;CAMSAP2
regulation of phosphatase activity (GO:0010921)	4/28	0.0277219	0.206075	0	0	3.84378	13.782	PTPA;PPP6R2;PPP6R3;MTMR9
antigen processing and presentation of exogenous peptide antigen (GO:0002478)	9/103	0.0281157	0.208508	0	0	2.21338	7.90495	MFSD6;SEC23A;KLC2;ACTR1B;SEC24A;AP1G1;AP2A1;KIFAP3;ACTR10
Fc-gamma receptor signaling pathway involved in phagocytosis (GO:0038096)	7/71	0.0282298	0.208861	0	0	2.52634	9.0124	CYFIP2;NCKIPSD;CYFIP1;WIPF2;ARPC4;ACTB;NCK1
cytoskeleton organization (GO:0007010)	10/120	0.0285196	0.210082	0	0	2.10238	7.47852	NCKIPSD;STRIP1;DIAPH1;DMTN;DST;ABI2;EPB41L3;RANBP9;PDZD8;WASF3
regulation of transcription from RNA polymerase II promoter in response to stress (GO:0043618)	8/87	0.0286055	0.210082	0	0	2.34003	8.31681	PSMD8;PSMD6;PSMD12;PSMD4;UBB;PSMD5;PSMD3;CUL2
sodium ion transmembrane transport (GO:0035725)	8/87	0.0286055	0.210082	0	0	2.34003	8.31681	SLC12A2;SLC24A3;SLC6A9;SLC9A7;SCN8A;ATP1A2;SLC4A4;SLC6A3
Fc-gamma receptor signaling pathway (GO:0038094)	7/72	0.0301885	0.210082	0	0	2.48734	8.70642	CYFIP2;NCKIPSD;CYFIP1;WIPF2;ARPC4;ACTB;NCK1
actin filament polymerization (GO:0030041)	4/29	0.0311285	0.210082	0	0	3.68983	12.8024	DIAPH1;SPIRE1;ARHGAP6;WASF3
aggrephagy (GO:0035973)	4/29	0.0311285	0.210082	0	0	3.68983	12.8024	UBB;WDFY3;UBE2V1;HDAC6
positive regulation of dephosphorylation (GO:0035306)	4/29	0.0311285	0.210082	0	0	3.68983	12.8024	PTPA;MTMR9;PPP2R5A;CALM1
positive regulation of viral genome replication (GO:0045070)	4/29	0.0311285	0.210082	0	0	3.68983	12.8024	SRPK2;DDX3X;LARP1;HACD3
protein K11-linked ubiquitination (GO:0070979)	4/29	0.0311285	0.210082	0	0	3.68983	12.8024	UBE2H;CDC26;UBE2D3;UBE2L3
regulation of protein targeting to membrane (GO:0090313)	4/29	0.0311285	0.210082	0	0	3.68983	12.8024	C2CD5;DMTN;INPP5K;ANK3
aspartate transmembrane transport (GO:0015810)	2/7	0.0317212	0.210082	0	0	9.21202	31.7886	SLC25A12;SLC25A22
cellular hypotonic response (GO:0071476)	2/7	0.0317212	0.210082	0	0	9.21202	31.7886	CAB39;SLC12A6
cellular response to histamine (GO:0071420)	2/7	0.0317212	0.210082	0	0	9.21202	31.7886	DIAPH1;GABRB2
cellular response to platelet-derived growth factor stimulus (GO:0036120)	2/7	0.0317212	0.210082	0	0	9.21202	31.7886	SYAP1;MTSS2
collagen-activated tyrosine kinase receptor signaling pathway (GO:0038063)	2/7	0.0317212	0.210082	0	0	9.21202	31.7886	COL4A2;UBASH3B
dopamine transport (GO:0015872)	2/7	0.0317212	0.210082	0	0	9.21202	31.7886	SLC18A2;SLC6A3
endosome to lysosome transport via multivesicular body sorting pathway (GO:0032510)	2/7	0.0317212	0.210082	0	0	9.21202	31.7886	LYST;UBXN6
glutamine transport (GO:0006868)	2/7	0.0317212	0.210082	0	0	9.21202	31.7886	SLC1A4;SLC38A3
insulin secretion involved in cellular response to glucose stimulus (GO:0035773)	2/7	0.0317212	0.210082	0	0	9.21202	31.7886	RAB11FIP2;RAB11FIP5
L-alanine transport (GO:0015808)	2/7	0.0317212	0.210082	0	0	9.21202	31.7886	SLC1A4;SLC38A3
late nucleophagy (GO:0044805)	2/7	0.0317212	0.210082	0	0	9.21202	31.7886	ULK2;ATG2B
lysosomal microautophagy (GO:0016237)	2/7	0.0317212	0.210082	0	0	9.21202	31.7886	ULK2;ATG2B
membrane biogenesis (GO:0044091)	2/7	0.0317212	0.210082	0	0	9.21202	31.7886	ANK3;SPTBN1
negative regulation of axon regeneration (GO:0048681)	2/7	0.0317212	0.210082	0	0	9.21202	31.7886	EPHA4;INPP5F
negative regulation of dendritic spine development (GO:0061000)	2/7	0.0317212	0.210082	0	0	9.21202	31.7886	NLGN1;PTEN
neuron projection arborization (GO:0140058)	2/7	0.0317212	0.210082	0	0	9.21202	31.7886	NLGN1;PHACTR1
parallel actin filament bundle assembly (GO:0030046)	2/7	0.0317212	0.210082	0	0	9.21202	31.7886	SPIRE1;FMN2
photoreceptor cell differentiation (GO:0046530)	2/7	0.0317212	0.210082	0	0	9.21202	31.7886	AGTPBP1;STAT3
piecemeal microautophagy of the nucleus (GO:0034727)	2/7	0.0317212	0.210082	0	0	9.21202	31.7886	ULK2;ATG2B
polyamine biosynthetic process (GO:0006596)	2/7	0.0317212	0.210082	0	0	9.21202	31.7886	SMS;SRM
positive regulation of catecholamine secretion (GO:0033605)	2/7	0.0317212	0.210082	0	0	9.21202	31.7886	CHRNB2;GRK2
positive regulation of ER-associated ubiquitin-dependent protein catabolic process (GO:1903071)	2/7	0.0317212	0.210082	0	0	9.21202	31.7886	BCAP31;UBQLN2
positive regulation of microtubule nucleation (GO:0090063)	2/7	0.0317212	0.210082	0	0	9.21202	31.7886	CKAP5;HSPA1B
positive regulation of potassium ion import across plasma membrane (GO:1903288)	2/7	0.0317212	0.210082	0	0	9.21202	31.7886	WNK2;WNK3
protein localization to endoplasmic reticulum exit site (GO:0070973)	2/7	0.0317212	0.210082	0	0	9.21202	31.7886	BCAP31;MIA3
purine-containing compound metabolic process (GO:0072521)	2/7	0.0317212	0.210082	0	0	9.21202	31.7886	GUK1;MACROD2
regulation by virus of viral protein levels in host cell (GO:0046719)	2/7	0.0317212	0.210082	0	0	9.21202	31.7886	STAT1;HACD3
regulation of cytoplasmic mRNA processing body assembly (GO:0010603)	2/7	0.0317212	0.210082	0	0	9.21202	31.7886	ATXN2L;ATXN2
regulation of glycogen (starch) synthase activity (GO:2000465)	2/7	0.0317212	0.210082	0	0	9.21202	31.7886	EPM2AIP1;INPP5K
regulation of histamine secretion by mast cell (GO:1903593)	2/7	0.0317212	0.210082	0	0	9.21202	31.7886	SNX4;SNX6
regulation of ketone biosynthetic process (GO:0010566)	2/7	0.0317212	0.210082	0	0	9.21202	31.7886	PPTC7;DGKQ
response to increased oxygen levels (GO:0036296)	2/7	0.0317212	0.210082	0	0	9.21202	31.7886	ATP6V1A;ATP6V0D1
synaptic transmission, dopaminergic (GO:0001963)	2/7	0.0317212	0.210082	0	0	9.21202	31.7886	TH;SLC6A3
tachykinin receptor signaling pathway (GO:0007217)	2/7	0.0317212	0.210082	0	0	9.21202	31.7886	GRK2;TACR1
cellular biogenic amine biosynthetic process (GO:0042401)	3/17	0.0317434	0.210082	0	0	4.93863	17.0386	DDC;TH;SRM
membrane depolarization during cardiac muscle cell action potential (GO:0086012)	3/17	0.0317434	0.210082	0	0	4.93863	17.0386	CACNB2;ANK2;ATP1A2
midbody abscission (GO:0061952)	3/17	0.0317434	0.210082	0	0	4.93863	17.0386	CHMP1A;CHMP4B;CHMP7
regulation of cardiac muscle contraction by regulation of the release of sequestered calcium ion (GO:0010881)	3/17	0.0317434	0.210082	0	0	4.93863	17.0386	ANK2;ATP1A2;CALM1
regulation of Golgi organization (GO:1903358)	3/17	0.0317434	0.210082	0	0	4.93863	17.0386	CAMSAP3;CAMSAP2;RAB33B
regulation of metal ion transport (GO:0010959)	3/17	0.0317434	0.210082	0	0	4.93863	17.0386	STIM1;ANK2;SRI
antigen processing and presentation of exogenous peptide antigen via MHC class I, TAP-dependent (GO:0002479)	7/73	0.0322366	0.211561	0	0	2.44953	8.41327	PSMD8;PSMD6;PSMD12;ITGB5;PSMD4;PSMD5;PSMD3
negative regulation of cell adhesion (GO:0007162)	7/73	0.0322366	0.211561	0	0	2.44953	8.41327	DMTN;SEMA4D;ADAM22;PLXNA1;MIA3;CORO2B;PLXNA4
regulation of actin filament polymerization (GO:0030833)	7/73	0.0322366	0.211561	0	0	2.44953	8.41327	FCHSD1;CTTN;CDC42EP4;HIP1R;CYRIB;KANK4;NCK1
ubiquitin-dependent ERAD pathway (GO:0030433)	7/73	0.0322366	0.211561	0	0	2.44953	8.41327	DNAJB2;FBXO2;DNAJB14;STUB1;USP19;UBE2J1;UBQLN2
small GTPase mediated signal transduction (GO:0007264)	9/106	0.0330127	0.216144	0	0	2.14459	7.31491	BCR;USP8;ABR;RALBP1;RRAGC;G3BP2;RRAS2;HACD3;RUNDC3A
cellular response to starvation (GO:0009267)	12/158	0.0330728	0.216144	0	0	1.90181	6.48335	ATP6V1A;RPTOR;ATP6V1G2;BMPR2;RRAGC;CASTOR2;STK26;VPS41;ATP6V1H;ATP6V0D1;ZFYVE1;ATP6V1D
positive regulation of mitochondrion organization (GO:0010822)	6/58	0.0332407	0.21679	0	0	2.6636	9.06684	RALBP1;BAD;HIP1R;SPIRE1;DDHD1;MARCHF5
Fc receptor mediated stimulatory signaling pathway (GO:0002431)	7/74	0.0343755	0.223726	0	0	2.41284	8.13226	CYFIP2;NCKIPSD;CYFIP1;WIPF2;ARPC4;ACTB;NCK1
ion homeostasis (GO:0050801)	4/30	0.0347702	0.224895	0	0	3.54773	11.9168	WNK2;WNK3;AP3D1;SLC4A4
synaptic vesicle cycle (GO:0099504)	4/30	0.0347702	0.224895	0	0	3.54773	11.9168	NLGN1;RAB5A;SLC18A2;SYT7
TRIF-dependent toll-like receptor signaling pathway (GO:0035666)	4/30	0.0347702	0.224895	0	0	3.54773	11.9168	UBB;IRF3;TRAF3;UBE2D3
positive regulation of potassium ion transmembrane transport (GO:1901381)	5/44	0.0353478	0.228161	0	0	2.958	9.88716	KCNJ6;WNK2;WNK3;ANK2;KCNN3
Ras protein signal transduction (GO:0007265)	11/142	0.0355636	0.229082	0	0	1.94211	6.47973	RAP2C;CYFIP1;USP8;RAP2A;ABI2;CDC42EP4;G3BP2;RRAS2;HACD3;ARHGAP5;ARHGAP6
selective autophagy (GO:0061912)	6/59	0.0357501	0.229812	0	0	2.61321	8.70512	UBB;ULK2;WDFY3;UBE2V1;HDAC6;ATG2B
positive regulation of supramolecular fiber organization (GO:1902905)	8/91	0.0360742	0.231421	0	0	2.22679	7.39778	FCHSD1;CTTN;CDC42EP4;KATNB1;SLAIN2;PSEN1;CLASP1;NCK1
acidic amino acid transport (GO:0015800)	3/18	0.0369415	0.232702	0	0	4.60915	15.2029	SLC1A1;SLC25A12;SLC25A22
alternative mRNA splicing, via spliceosome (GO:0000380)	3/18	0.0369415	0.232702	0	0	4.60915	15.2029	DDX5;SRSF1;CELF4
amyloid precursor protein metabolic process (GO:0042982)	3/18	0.0369415	0.232702	0	0	4.60915	15.2029	ACHE;TMCC2;PSEN1
interleukin-6-mediated signaling pathway (GO:0070102)	3/18	0.0369415	0.232702	0	0	4.60915	15.2029	STAT1;STAT3;CBL
negative regulation of leukocyte cell-cell adhesion (GO:1903038)	3/18	0.0369415	0.232702	0	0	4.60915	15.2029	DUSP3;MIA3;PAG1
neuron maturation (GO:0042551)	3/18	0.0369415	0.232702	0	0	4.60915	15.2029	C1QA;MTCH1;ANKS1A
phosphatidylinositol acyl-chain remodeling (GO:0036149)	3/18	0.0369415	0.232702	0	0	4.60915	15.2029	LPGAT1;MBOAT7;LCLAT1
regulation of protein-containing complex disassembly (GO:0043244)	3/18	0.0369415	0.232702	0	0	4.60915	15.2029	UPF1;GSPT1;HDAC6
RNA destabilization (GO:0050779)	3/18	0.0369415	0.232702	0	0	4.60915	15.2029	YTHDF1;RIDA;YTHDF3
negative regulation of growth (GO:0045926)	10/126	0.0380505	0.239207	0	0	1.99301	6.51484	DNAJB2;PPP2CA;CDA;STK11;BMPR2;DDX3X;PPP2R1A;SPHK2;GNG4;HSPA1B
negative regulation of mitotic cell cycle phase transition (GO:1901991)	8/92	0.0381286	0.239219	0	0	2.20016	7.18747	PSMD8;USP47;PSMD6;PSMD12;PSMD4;PSMD5;PSMD3;PTEN
microtubule bundle formation (GO:0001578)	5/45	0.038453	0.240079	0	0	2.8839	9.39665	ZNF207;NAV1;TPPP;MARK4;CLASP1
'de novo' posttranslational protein folding (GO:0051084)	4/31	0.0386483	0.240079	0	0	3.41615	11.1136	DNAJB4;DNAJB14;HSPA2;HSPA1B
MyD88-independent toll-like receptor signaling pathway (GO:0002756)	4/31	0.0386483	0.240079	0	0	3.41615	11.1136	UBB;IRF3;TRAF3;UBE2D3
positive regulation of RNA splicing (GO:0033120)	4/31	0.0386483	0.240079	0	0	3.41615	11.1136	DAZAP1;CELF4;HABP4;DYRK1A
receptor signaling pathway via JAK-STAT (GO:0007259)	4/31	0.0386483	0.240079	0	0	3.41615	11.1136	STAT5B;STAT1;STAT2;STAT3
cilium assembly (GO:0060271)	20/314	0.0404928	0.245838	0	0	1.57716	5.05738	IQCB1;ARL6;CETN2;SEPTIN6;TUBB4A;CKAP5;SEPTIN7;HDAC6;WDR11;ABLIM1;EHD4;ABLIM3;PPP2R1A;RP2;KIFAP3;ATP6V0D1;MARK4;TNPO1;ATP6V1D;CLASP1
cellular response to interleukin-21 (GO:0098757)	2/8	0.0411428	0.245838	0	0	7.67628	24.4928	STAT1;STAT3
excitatory synapse assembly (GO:1904861)	2/8	0.0411428	0.245838	0	0	7.67628	24.4928	NLGN1;PTEN
interleukin-21-mediated signaling pathway (GO:0038114)	2/8	0.0411428	0.245838	0	0	7.67628	24.4928	STAT1;STAT3
monoamine transport (GO:0015844)	2/8	0.0411428	0.245838	0	0	7.67628	24.4928	SLC18A2;SLC6A3
negative regulation of actin nucleation (GO:0051126)	2/8	0.0411428	0.245838	0	0	7.67628	24.4928	CTNNA2;ARPIN
negative regulation of lipid kinase activity (GO:0090219)	2/8	0.0411428	0.245838	0	0	7.67628	24.4928	PPP2R5A;WASHC1
negative regulation of neuron projection regeneration (GO:0070571)	2/8	0.0411428	0.245838	0	0	7.67628	24.4928	EPHA4;INPP5F
negative regulation of sodium ion transport (GO:0010766)	2/8	0.0411428	0.245838	0	0	7.67628	24.4928	WNK2;WNK3
positive regulation of extracellular matrix disassembly (GO:0090091)	2/8	0.0411428	0.245838	0	0	7.67628	24.4928	CARMIL2;CLASP1
positive regulation of homotypic cell-cell adhesion (GO:0034112)	2/8	0.0411428	0.245838	0	0	7.67628	24.4928	DMTN;ANK3
positive regulation of neuron projection arborization (GO:0150012)	2/8	0.0411428	0.245838	0	0	7.67628	24.4928	DVL1;DVL2
postsynaptic density organization (GO:0097106)	2/8	0.0411428	0.245838	0	0	7.67628	24.4928	NLGN1;PTEN
regulation of collateral sprouting (GO:0048670)	2/8	0.0411428	0.245838	0	0	7.67628	24.4928	SEMA4D;ULK2
regulation of myeloid leukocyte differentiation (GO:0002761)	2/8	0.0411428	0.245838	0	0	7.67628	24.4928	UBASH3B;PRXL2A
regulation of potassium ion import (GO:1903286)	2/8	0.0411428	0.245838	0	0	7.67628	24.4928	WNK2;WNK3
regulation of translational termination (GO:0006449)	2/8	0.0411428	0.245838	0	0	7.67628	24.4928	UPF1;GSPT1
RNA secondary structure unwinding (GO:0010501)	2/8	0.0411428	0.245838	0	0	7.67628	24.4928	DDX3X;AGO2
spermidine metabolic process (GO:0008216)	2/8	0.0411428	0.245838	0	0	7.67628	24.4928	HDAC6;SRM
TORC1 signaling (GO:0038202)	2/8	0.0411428	0.245838	0	0	7.67628	24.4928	RPTOR;LARP1
plasma membrane bounded cell projection organization (GO:0120036)	10/128	0.0416644	0.247508	0	0	1.95903	6.226	CYFIP1;CNTNAP2;NLGN1;CTTN;GPRIN1;DOCK7;TBC1D24;FRY;KIFAP3;MARK4
cytoplasmic translational initiation (GO:0002183)	3/19	0.0425462	0.247508	0	0	4.32085	13.6416	DENR;EIF4B;EIF4G1
dopamine metabolic process (GO:0042417)	3/19	0.0425462	0.247508	0	0	4.32085	13.6416	GCH1;MAOB;TH
negative regulation of calcium ion transport (GO:0051926)	3/19	0.0425462	0.247508	0	0	4.32085	13.6416	INPP5K;ATP1A2;CBARP
neuromuscular process (GO:0050905)	3/19	0.0425462	0.247508	0	0	4.32085	13.6416	AGTPBP1;GCH1;MYCBP2
positive regulation of establishment of protein localization (GO:1904951)	3/19	0.0425462	0.247508	0	0	4.32085	13.6416	CCT6A;CCT8;CORO2B
prostaglandin biosynthetic process (GO:0001516)	3/19	0.0425462	0.247508	0	0	4.32085	13.6416	PTGES2;PRXL2B;PTGDS
Rac protein signal transduction (GO:0016601)	3/19	0.0425462	0.247508	0	0	4.32085	13.6416	CYFIP1;ABI2;HACD3
regulation of mitotic spindle assembly (GO:1901673)	3/19	0.0425462	0.247508	0	0	4.32085	13.6416	CHMP1A;CHMP4B;HSPA1B
regulation of synaptic vesicle exocytosis (GO:2000300)	3/19	0.0425462	0.247508	0	0	4.32085	13.6416	NLGN1;SEPTIN5;RAB5A
ERBB2 signaling pathway (GO:0038128)	4/32	0.0427635	0.247508	0	0	3.29398	10.3828	ERBB4;GAB1;CPNE3;STUB1
intra-Golgi vesicle-mediated transport (GO:0006891)	4/32	0.0427635	0.247508	0	0	3.29398	10.3828	TRAPPC10;RAB6B;NAPG;RAB33B
membrane depolarization (GO:0051899)	4/32	0.0427635	0.247508	0	0	3.29398	10.3828	CHRNB2;CACNB4;CHRNA4;SCN8A
negative regulation of cell-matrix adhesion (GO:0001953)	4/32	0.0427635	0.247508	0	0	3.29398	10.3828	BCAS3;DMTN;PTEN;ARHGAP6
negative regulation of chemotaxis (GO:0050922)	4/32	0.0427635	0.247508	0	0	3.29398	10.3828	ROBO2;DUSP3;SEMA4D;SEMA6D
positive regulation of glucose transmembrane transport (GO:0010828)	4/32	0.0427635	0.247508	0	0	3.29398	10.3828	OSBPL8;C2CD5;BRAF;APPL1
response to amino acid (GO:0043200)	4/32	0.0427635	0.247508	0	0	3.29398	10.3828	RPTOR;RRAGC;CPEB3;IPO5
protein phosphorylation (GO:0006468)	29/496	0.0428482	0.247541	0	0	1.44246	4.54388	RET;BMPR2;CAB39;AATK;NRBP2;STK11;GRK2;ERBB4;RPS6KA1;ABL2;STK38L;MARK4;STK32C;MAP2K6;SRPK2;EPHA4;DYRK1A;LMTK3;BRAF;NRBP1;CIT;BCR;ABI2;DGKQ;STK26;WNK2;WNK3;ULK2;CDK14
regulation of neuron projection development (GO:0010975)	12/165	0.0437884	0.252508	0	0	1.81413	5.6753	RET;EPHA4;ABI2;PTEN;ABL2;PSEN1;KIF1A;CTNNA2;PDLIM5;TANC2;PPFIA2;CAMSAP2
epidermal growth factor receptor signaling pathway (GO:0007173)	5/47	0.0451487	0.259874	0	0	2.74628	8.50741	GAREM1;REPS2;GAB1;BRAF;CBL
regulation of ion transport (GO:0043269)	7/79	0.0464749	0.267018	0	0	2.24469	6.88861	CHRNB2;KCNJ6;CHRNA4;ANK3;SYT7;SNX6;SYT17
actin cytoskeleton reorganization (GO:0031532)	6/63	0.0469854	0.269457	0	0	2.42932	7.42865	RAP2A;DMTN;CTTN;GAB1;S1PR1;PHACTR1
antigen processing and presentation of peptide antigen via MHC class I (GO:0002474)	4/33	0.0471157	0.269711	0	0	3.18022	9.71606	BCAP31;SEC23A;MFSD6;SEC24A
cellular response to misfolded protein (GO:0071218)	3/20	0.0485498	0.274015	0	0	4.06647	12.3017	RNF126;DNAJB14;STUB1
endoplasmic reticulum calcium ion homeostasis (GO:0032469)	3/20	0.0485498	0.274015	0	0	4.06647	12.3017	BCAP31;PACS2;PSEN1
mitotic cytokinetic process (GO:1902410)	3/20	0.0485498	0.274015	0	0	4.06647	12.3017	CHMP1A;CHMP4B;CHMP7
negative regulation of cyclin-dependent protein serine/threonine kinase activity (GO:0045736)	3/20	0.0485498	0.274015	0	0	4.06647	12.3017	PTEN;IPO7;IPO5
positive regulation of interferon-alpha production (GO:0032727)	3/20	0.0485498	0.274015	0	0	4.06647	12.3017	DDX3X;IRF3;STAT1
regulation of protein localization to cell periphery (GO:1904375)	3/20	0.0485498	0.274015	0	0	4.06647	12.3017	ACTB;SPTBN1;APPL1
regulation of protein modification by small protein conjugation or removal (GO:1903320)	3/20	0.0485498	0.274015	0	0	4.06647	12.3017	DNAJB2;WASHC1;HSPA1B
Golgi to plasma membrane transport (GO:0006893)	5/48	0.0487409	0.274015	0	0	2.68227	8.10378	GGA3;EXOC6B;GOPC;ANK3;SPTBN1
myelination (GO:0042552)	5/48	0.0487409	0.274015	0	0	2.68227	8.10378	SCN8A;EPB41L3;MAL2;ACSBG1;TPPP
regulation of mitochondrion organization (GO:0010821)	5/48	0.0487409	0.274015	0	0	2.68227	8.10378	RHOT1;STAT2;CYRIB;HDAC6;MARCHF5
positive regulation of gene expression (GO:0010628)	28/482	0.0491059	0.275021	0	0	1.43182	4.31517	DDX5;SLC24A3;DDX3X;PSEN1;FGF1;AGPAT1;ELAVL1;ACTB;CAMK2N1;HABP4;SRPK2;YTHDF1;CADM1;YTHDF3;SPHK2;STAT3;GLMN;DYRK1A;PYM1;BRAF;ANK2;ANK3;WARS1;AFDN;DGKQ;AGO2;CPEB3;HSPA1B
negative regulation of cellular component organization (GO:0051129)	7/80	0.049183	0.275021	0	0	2.21383	6.66851	DNAJB2;LRSAM1;CARMIL2;DDX3X;HSPA2;HDAC6;HSPA1B
regulation of protein localization to plasma membrane (GO:1903076)	7/80	0.049183	0.275021	0	0	2.21383	6.66851	ITGA3;WNK3;NUMB;PPP2R5A;ACTB;SPTBN1;APPL1
plasma membrane organization (GO:0007009)	6/64	0.0500991	0.277743	0	0	2.38731	7.147	EPB41L3;OSBPL2;ANK2;ANK3;SPTBN1;SYT7
regulation of cellular ketone metabolic process (GO:0010565)	6/64	0.0500991	0.277743	0	0	2.38731	7.147	PSMD8;PSMD6;PSMD12;PSMD4;PSMD5;PSMD3
adenosine metabolic process (GO:0046085)	2/9	0.0514622	0.277743	0	0	6.57933	19.5203	ADAL;NT5C2
amyloid-beta formation (GO:0034205)	2/9	0.0514622	0.277743	0	0	6.57933	19.5203	DYRK1A;PSEN1
astral microtubule organization (GO:0030953)	2/9	0.0514622	0.277743	0	0	6.57933	19.5203	TPPP;CLASP1
collagen-activated signaling pathway (GO:0038065)	2/9	0.0514622	0.277743	0	0	6.57933	19.5203	COL4A2;UBASH3B
endosome to melanosome transport (GO:0035646)	2/9	0.0514622	0.277743	0	0	6.57933	19.5203	AP1G1;AP3D1
endosome to pigment granule transport (GO:0043485)	2/9	0.0514622	0.277743	0	0	6.57933	19.5203	AP1G1;AP3D1
glucosamine-containing compound catabolic process (GO:1901072)	2/9	0.0514622	0.277743	0	0	6.57933	19.5203	GNPDA1;GNPDA2
IMP metabolic process (GO:0046040)	2/9	0.0514622	0.277743	0	0	6.57933	19.5203	ADSS2;NT5C2
negative regulation of exocytosis (GO:0045920)	2/9	0.0514622	0.277743	0	0	6.57933	19.5203	ATP9A;RAB33B
neuronal ion channel clustering (GO:0045161)	2/9	0.0514622	0.277743	0	0	6.57933	19.5203	CNTNAP2;MTCH1
positive regulation of cell-cell adhesion mediated by cadherin (GO:2000049)	2/9	0.0514622	0.277743	0	0	6.57933	19.5203	AFDN;PTPRU
positive regulation of mast cell degranulation (GO:0043306)	2/9	0.0514622	0.277743	0	0	6.57933	19.5203	SNX4;SPHK2
positive regulation of membrane potential (GO:0045838)	2/9	0.0514622	0.277743	0	0	6.57933	19.5203	BAD;ANK3
positive regulation of tumor necrosis factor-mediated signaling pathway (GO:1903265)	2/9	0.0514622	0.277743	0	0	6.57933	19.5203	UBE2K;HSPA1B
regulation of protein deacetylation (GO:0090311)	2/9	0.0514622	0.277743	0	0	6.57933	19.5203	SPRED3;DYRK1A
regulation of transmembrane transporter activity (GO:0022898)	2/9	0.0514622	0.277743	0	0	6.57933	19.5203	AHCYL1;ACTB
semaphorin-plexin signaling pathway involved in axon guidance (GO:1902287)	2/9	0.0514622	0.277743	0	0	6.57933	19.5203	PLXNA1;PLXNA4
cell-substrate junction assembly (GO:0007044)	4/34	0.0517041	0.277743	0	0	3.07406	9.10603	BCR;DST;CTTN;FERMT2
regulation of lamellipodium assembly (GO:0010591)	4/34	0.0517041	0.277743	0	0	3.07406	9.10603	CYFIP1;CARMIL2;DMTN;ABI2
regulation of cell adhesion (GO:0030155)	10/133	0.0517061	0.277743	0	0	1.8789	5.56563	RET;PPP2CA;EPHA4;SEMA4D;PPP2R1A;ADAM22;ABL2;PLXNA1;MIA3;PLXNA4
transmembrane receptor protein serine/threonine kinase signaling pathway (GO:0007178)	10/133	0.0517061	0.277743	0	0	1.8789	5.56563	DDX5;BMPR2;UBB;ITGB5;USP9X;ZYX;STUB1;CBL;FERMT2;APPL1
antigen processing and presentation of exogenous peptide antigen via MHC class II (GO:0019886)	8/98	0.0521003	0.279382	0	0	2.05284	6.06528	SEC23A;KLC2;ACTR1B;SEC24A;AP1G1;AP2A1;KIFAP3;ACTR10
response to unfolded protein (GO:0006986)	5/49	0.052497	0.281029	0	0	2.62118	7.7246	DNAJB2;DNAJB4;HSPA4L;HSPA2;HSPA1B
protein autoubiquitination (GO:0051865)	6/65	0.0533365	0.284552	0	0	2.34672	6.87855	LRSAM1;RNF11;UBE2D3;UBE3A;STUB1;MARCHF5
regulation of cellular catabolic process (GO:0031329)	6/65	0.0533365	0.284552	0	0	2.34672	6.87855	RPTOR;RRAGC;WDR41;ABL2;RAB39B;HDAC6
actin filament organization (GO:0007015)	11/152	0.0535763	0.285346	0	0	1.80343	5.27799	ENAH;CARMIL2;DMTN;ABI2;NEBL;HIP1R;SPIRE1;ARPC4;VILL;CD2AP;ARHGAP12
ephrin receptor signaling pathway (GO:0048013)	7/82	0.0548939	0.286306	0	0	2.15457	6.25331	EPHA4;SDC2;AP2A1;ARPC4;PSEN1;ANKS1A;ACTB
acetylcholine receptor signaling pathway (GO:0095500)	3/21	0.0549429	0.286306	0	0	3.84035	11.1426	CHRNB2;GRK2;CHRM4
actin nucleation (GO:0045010)	3/21	0.0549429	0.286306	0	0	3.84035	11.1426	SPIRE1;ARPC4;WASHC1
aerobic respiration (GO:0009060)	3/21	0.0549429	0.286306	0	0	3.84035	11.1426	NDUFS8;ME3;UQCR10
calcium-mediated signaling using intracellular calcium source (GO:0035584)	3/21	0.0549429	0.286306	0	0	3.84035	11.1426	BCAP31;DMTN;ADGRL1
focal adhesion assembly (GO:0048041)	3/21	0.0549429	0.286306	0	0	3.84035	11.1426	BCR;CTTN;FERMT2
negative regulation of ion transmembrane transporter activity (GO:0032413)	3/21	0.0549429	0.286306	0	0	3.84035	11.1426	CAB39;HECW2;GOPC
negative regulation of small GTPase mediated signal transduction (GO:0051058)	3/21	0.0549429	0.286306	0	0	3.84035	11.1426	CYRIB;ARHGAP12;CD2AP
positive regulation of phosphatase activity (GO:0010922)	3/21	0.0549429	0.286306	0	0	3.84035	11.1426	PTPA;MTMR9;CALM1
regulation of cardiac muscle contraction by calcium ion signaling (GO:0010882)	3/21	0.0549429	0.286306	0	0	3.84035	11.1426	ANK2;ATP1A2;CALM1
regulation of cell-substrate junction assembly (GO:0090109)	3/21	0.0549429	0.286306	0	0	3.84035	11.1426	CAMSAP3;DUSP3;CLASP1
sensory perception of pain (GO:0019233)	3/21	0.0549429	0.286306	0	0	3.84035	11.1426	CHRNB2;CHRNA4;NIPSNAP1
vacuolar acidification (GO:0007035)	3/21	0.0549429	0.286306	0	0	3.84035	11.1426	DMXL2;ATP6V1H;ATP6V0D1
positive regulation of Wnt signaling pathway (GO:0030177)	11/153	0.0556609	0.289566	0	0	1.79063	5.1722	PSMD8;USP8;USP47;PSMD6;PSMD12;DDX3X;PSMD4;PSMD5;WNK2;PSMD3;GID8
positive regulation of cell projection organization (GO:0031346)	9/117	0.055928	0.290223	0	0	1.92505	5.55125	PTPRD;RET;ROBO2;CARMIL2;DVL1;DVL2;ABL2;PLXNA1;PLXNA4
iron ion transport (GO:0006826)	5/50	0.056417	0.290223	0	0	2.56279	7.36799	ATP6V1A;ATP6V1G2;ATP6V1H;ATP6V0D1;ATP6V1D
cellular response to virus (GO:0098586)	4/35	0.0565273	0.290223	0	0	2.97474	8.54652	TOMM70;DDX3X;IRF3;GSDME
regulation of autophagosome assembly (GO:2000785)	4/35	0.0565273	0.290223	0	0	2.97474	8.54652	LRSAM1;CHMP4B;RAB5A;UBQLN2
regulation of mitotic spindle organization (GO:0060236)	4/35	0.0565273	0.290223	0	0	2.97474	8.54652	CHMP1A;CHMP4B;FSD1;HSPA1B
regulation of regulated secretory pathway (GO:1903305)	4/35	0.0565273	0.290223	0	0	2.97474	8.54652	SEPTIN5;RAB5A;SYT7;SYT17
regulation of TORC1 signaling (GO:1903432)	4/35	0.0565273	0.290223	0	0	2.97474	8.54652	STK11;RRAGC;CASTOR2;DGKQ
regulation of trans-synaptic signaling (GO:0099177)	4/35	0.0565273	0.290223	0	0	2.97474	8.54652	BCR;ABR;NLGN1;EIF4EBP2
central nervous system development (GO:0007417)	17/268	0.0573299	0.293753	0	0	1.56805	4.48294	ROBO2;C1QA;CNTNAP2;STAT3;ADAM22;PTEN;SLC2A1;AATK;WWP1;ELP3;UBE3A;S100B;PTS;HAPLN2;ADORA2A;ADAM23;TPPP
antigen processing and presentation of peptide antigen via MHC class II (GO:0002495)	8/100	0.0574022	0.293753	0	0	2.008	5.73821	SEC23A;KLC2;ACTR1B;SEC24A;AP1G1;AP2A1;KIFAP3;ACTR10
protein modification by small protein conjugation (GO:0032446)	24/409	0.0590464	0.299299	0	0	1.44539	4.08963	UBE2H;USP5;EIPR1;USP9X;RNF14;UBA6;FBXO2;UBE2D3;CUL2;MYCBP2;FBXL17;WWP1;DTX3;RANGAP1;CBL;UBE2L3;UBB;HECW2;ARIH2;STUB1;ARIH1;TRIM32;UBE2K;UBE2M
cellular response to interleukin-1 (GO:0071347)	11/155	0.0599902	0.299299	0	0	1.76558	4.96758	PSMD8;UPF1;PSMD6;PSMD12;PSMD4;UBB;PSMD5;PSMD3;TAB3;UBE2V1;TAB1
mitotic nuclear membrane organization (GO:0101024)	5/51	0.0605007	0.299299	0	0	2.50695	7.03224	PPP2CA;PPP2R1A;CHMP4B;RANGAP1;CHMP7
mitotic nuclear membrane reassembly (GO:0007084)	5/51	0.0605007	0.299299	0	0	2.50695	7.03224	PPP2CA;PPP2R1A;CHMP4B;RANGAP1;CHMP7
regulation of axonogenesis (GO:0050770)	5/51	0.0605007	0.299299	0	0	2.50695	7.03224	ROBO2;EPHA4;PTEN;PLXNA1;PLXNA4
cellular response to heat (GO:0034605)	4/36	0.0615834	0.299299	0	0	2.88163	8.03214	PDCD6;STUB1;FGF1;HSPA1B
intrinsic apoptotic signaling pathway by p53 class mediator (GO:0072332)	4/36	0.0615834	0.299299	0	0	2.88163	8.03214	DDX5;STK11;PPP1R13B;CDIP1
membrane lipid metabolic process (GO:0006643)	3/22	0.0617152	0.299299	0	0	3.63804	10.1328	AGK;SPHK2;TEX2
phosphatidylserine acyl-chain remodeling (GO:0036150)	3/22	0.0617152	0.299299	0	0	3.63804	10.1328	OSBPL8;MBOAT2;OSBPL10
positive regulation of dendritic spine development (GO:0060999)	3/22	0.0617152	0.299299	0	0	3.63804	10.1328	NLGN1;PSEN1;CPEB3
positive regulation of signal transduction by p53 class mediator (GO:1901798)	3/22	0.0617152	0.299299	0	0	3.63804	10.1328	SPRED3;DDX5;UBB
protein localization to cell junction (GO:1902414)	3/22	0.0617152	0.299299	0	0	3.63804	10.1328	NLGN1;FERMT2;NECTIN1
regulation of centrosome cycle (GO:0046605)	3/22	0.0617152	0.299299	0	0	3.63804	10.1328	CHMP1A;CHMP4B;MARK4
alanine transport (GO:0032328)	2/10	0.0625884	0.299299	0	0	5.75661	15.9526	SLC1A4;SLC38A3
apical protein localization (GO:0045176)	2/10	0.0625884	0.299299	0	0	5.75661	15.9526	GOPC;ACTB
cAMP biosynthetic process (GO:0006171)	2/10	0.0625884	0.299299	0	0	5.75661	15.9526	ADCY9;ADCY1
cellular response to oxygen levels (GO:0071453)	2/10	0.0625884	0.299299	0	0	5.75661	15.9526	ATP6V1A;ATP6V0D1
cGMP biosynthetic process (GO:0006182)	2/10	0.0625884	0.299299	0	0	5.75661	15.9526	GUCY2C;GUCY1B1
chloride ion homeostasis (GO:0055064)	2/10	0.0625884	0.299299	0	0	5.75661	15.9526	SLC12A2;SLC12A6
formation of translation preinitiation complex (GO:0001731)	2/10	0.0625884	0.299299	0	0	5.75661	15.9526	DENR;EIF4B
lipid phosphorylation (GO:0046834)	2/10	0.0625884	0.299299	0	0	5.75661	15.9526	DGKE;DGKQ
long-chain fatty acid import into cell (GO:0044539)	2/10	0.0625884	0.299299	0	0	5.75661	15.9526	SLC2A1;SLC27A4
monovalent inorganic anion homeostasis (GO:0055083)	2/10	0.0625884	0.299299	0	0	5.75661	15.9526	SLC12A2;SLC12A6
myelin assembly (GO:0032288)	2/10	0.0625884	0.299299	0	0	5.75661	15.9526	EPB41L3;TPPP
myelin maintenance (GO:0043217)	2/10	0.0625884	0.299299	0	0	5.75661	15.9526	EPB41L3;PTEN
N-acetylneuraminate metabolic process (GO:0006054)	2/10	0.0625884	0.299299	0	0	5.75661	15.9526	GNPDA1;GNPDA2
negative regulation of establishment of protein localization (GO:1904950)	2/10	0.0625884	0.299299	0	0	5.75661	15.9526	SNX12;CORO2B
negative regulation of sodium ion transmembrane transporter activity (GO:2000650)	2/10	0.0625884	0.299299	0	0	5.75661	15.9526	HECW2;ATP1A2
negative regulation of voltage-gated calcium channel activity (GO:1901386)	2/10	0.0625884	0.299299	0	0	5.75661	15.9526	CALM1;CBARP
neuron remodeling (GO:0016322)	2/10	0.0625884	0.299299	0	0	5.75661	15.9526	C1QA;ANKS1A
nucleic acid transport (GO:0050657)	2/10	0.0625884	0.299299	0	0	5.75661	15.9526	ATXN2;CKAP5
positive regulation of establishment of protein localization to telomere (GO:1904851)	2/10	0.0625884	0.299299	0	0	5.75661	15.9526	CCT6A;CCT8
production of siRNA involved in RNA interference (GO:0030422)	2/10	0.0625884	0.299299	0	0	5.75661	15.9526	AGO2;TSN
Rap protein signal transduction (GO:0032486)	2/10	0.0625884	0.299299	0	0	5.75661	15.9526	RAP2C;RAP2A
regulation of actin filament-based movement (GO:1903115)	2/10	0.0625884	0.299299	0	0	5.75661	15.9526	ANK2;SRI
regulation of axon guidance (GO:1902667)	2/10	0.0625884	0.299299	0	0	5.75661	15.9526	YTHDF1;MYCBP2
regulation of hydrogen peroxide-induced cell death (GO:1903205)	2/10	0.0625884	0.299299	0	0	5.75661	15.9526	GPR37;STK26
regulation of microtubule nucleation (GO:0010968)	2/10	0.0625884	0.299299	0	0	5.75661	15.9526	CKAP5;HSPA1B
regulation of peptidyl-lysine acetylation (GO:2000756)	2/10	0.0625884	0.299299	0	0	5.75661	15.9526	DIP2A;DIP2B
regulation of phospholipid metabolic process (GO:1903725)	2/10	0.0625884	0.299299	0	0	5.75661	15.9526	MTMR1;MTMR9
regulation of store-operated calcium entry (GO:2001256)	2/10	0.0625884	0.299299	0	0	5.75661	15.9526	STIM1;HOMER2
response to histamine (GO:0034776)	2/10	0.0625884	0.299299	0	0	5.75661	15.9526	DIAPH1;GABRB2
sarcoplasmic reticulum calcium ion transport (GO:0070296)	2/10	0.0625884	0.299299	0	0	5.75661	15.9526	ANK2;NOL3
mitochondrion organization (GO:0007005)	12/175	0.0629431	0.300513	0	0	1.70194	4.70675	TOMM70;BCAP31;CHCHD3;AGTPBP1;RHOT1;ATP5F1B;MTX1;MTX2;VPS13C;GDAP1;TIMM50;ATPAF1
regulation of cell death (GO:0010941)	8/102	0.0630339	0.300513	0	0	1.96507	5.43162	UBB;CHMP4B;RRAS2;SNCG;FERMT2;HSPA1B;EIF4G1;NCK1
regulation of release of sequestered calcium ion into cytosol (GO:0051279)	5/52	0.0647479	0.307749	0	0	2.45348	6.7158	DIAPH1;UBASH3B;ANK2;SRI;CALM1
response to peptide hormone (GO:0043434)	5/52	0.0647479	0.307749	0	0	2.45348	6.7158	EPM2AIP1;STAT5B;STAT1;STAT2;STAT3
regulation of erythrocyte differentiation (GO:0045646)	4/37	0.0668698	0.317353	0	0	2.79416	7.55822	STAT5B;STAT1;STAT3;HSPA1B
negative regulation of cellular amide metabolic process (GO:0034249)	7/86	0.0675089	0.319518	0	0	2.04505	5.51241	RTN2;DDX6;RIDA;DDX3X;GGA3;LARP1;CPEB3
peptidyl-tyrosine phosphorylation (GO:0018108)	6/69	0.0675297	0.319518	0	0	2.19726	5.92203	EPHA4;ABI2;ERBB4;DYRK1A;AATK;ABL2
artery development (GO:0060840)	3/23	0.0688548	0.324808	0	0	3.45596	9.2473	ROBO2;BMPR2;HECTD1
regulation of supramolecular fiber organization (GO:1902903)	3/23	0.0688548	0.324808	0	0	3.45596	9.2473	CAMSAP3;PRUNE1;CAMSAP2
regulation of plasma membrane bounded cell projection assembly (GO:0120032)	6/70	0.0713895	0.336259	0	0	2.16282	5.70898	DMTN;TBC1D5;TBC1D24;RAB5A;TBC1D15;TBC1D10B
negative regulation of intracellular signal transduction (GO:1902532)	13/198	0.0716277	0.336876	0	0	1.6246	4.2829	DUSP3;DDX3X;STAT1;PDCD6;PTEN;PPP2R5C;CYRIB;CD2AP;CIT;ARHGAP12;AKT1S1;INPP5K;GPD1L
cellular response to organic substance (GO:0071310)	9/123	0.071935	0.337814	0	0	1.82316	4.79854	ROBO2;STAT5B;BMPR2;SLC1A1;STAT3;INPP5K;CPNE3;CERS1;HDAC6
negative regulation of TOR signaling (GO:0032007)	4/38	0.0723834	0.338401	0	0	2.71184	7.12068	STK11;CASTOR2;PDCD6;AKT1S1
regulation of cell communication (GO:0010646)	4/38	0.0723834	0.338401	0	0	2.71184	7.12068	MTCH1;GRK2;ANK2;SRI
response to cAMP (GO:0051591)	4/38	0.0723834	0.338401	0	0	2.71184	7.12068	DMTN;STAT1;DGKQ;INPP5K
neutrophil degranulation (GO:0043312)	27/481	0.0730198	0.339399	0	0	1.37897	3.6088	CDA;CYFIP1;RAB5B;PSMD12;RAB5C;DDX3X;CAB39;PSEN1;HEBP2;PSMD6;ACTR1B;PSMD3;RAB24;TOM1;CPNE3;CCT8;ATP6V1D;PTGES2;ARMC8;CKAP4;SERPINB6;RAP2C;DIAPH1;CYSTM1;ACTR10;HSPA1B;RAB9B
nuclear membrane reassembly (GO:0031468)	5/54	0.0737295	0.339399	0	0	2.35309	6.13534	PPP2CA;PPP2R1A;CHMP4B;RANGAP1;CHMP7
endomembrane system organization (GO:0010256)	13/199	0.0738681	0.339399	0	0	1.61578	4.20989	USP8;BCAS3;ATL2;OSBPL2;AP3D1;MIA3;ANK3;HOOK3;ARHGAP21;VPS51;TRAPPC12;SPTBN1;CLASP1
actin filament network formation (GO:0051639)	2/11	0.0744364	0.339399	0	0	5.11672	13.2923	CARMIL2;SPIRE1
cellular glucan metabolic process (GO:0006073)	2/11	0.0744364	0.339399	0	0	5.11672	13.2923	GBE1;PYGM
cellular response to increased oxygen levels (GO:0036295)	2/11	0.0744364	0.339399	0	0	5.11672	13.2923	ATP6V1A;ATP6V0D1
cyclooxygenase pathway (GO:0019371)	2/11	0.0744364	0.339399	0	0	5.11672	13.2923	PTGES2;PTGDS
establishment of endothelial intestinal barrier (GO:0090557)	2/11	0.0744364	0.339399	0	0	5.11672	13.2923	RAP2C;AFDN
establishment of epithelial cell apical/basal polarity (GO:0045198)	2/11	0.0744364	0.339399	0	0	5.11672	13.2923	CAMSAP3;RAP2A
interleukin-35-mediated signaling pathway (GO:0070757)	2/11	0.0744364	0.339399	0	0	5.11672	13.2923	STAT1;STAT3
negative regulation of calcium ion transmembrane transport (GO:1903170)	2/11	0.0744364	0.339399	0	0	5.11672	13.2923	ATP1A2;CBARP
positive regulation of posttranscriptional gene silencing (GO:0060148)	2/11	0.0744364	0.339399	0	0	5.11672	13.2923	STAT3;XPO5
positive regulation of protein localization to Cajal body (GO:1904871)	2/11	0.0744364	0.339399	0	0	5.11672	13.2923	CCT6A;CCT8
proteasome assembly (GO:0043248)	2/11	0.0744364	0.339399	0	0	5.11672	13.2923	PSMD4;PSMD5
regulation of establishment of protein localization to telomere (GO:0070203)	2/11	0.0744364	0.339399	0	0	5.11672	13.2923	CCT6A;CCT8
regulation of protein localization to Cajal body (GO:1904869)	2/11	0.0744364	0.339399	0	0	5.11672	13.2923	CCT6A;CCT8
UDP-N-acetylglucosamine biosynthetic process (GO:0006048)	2/11	0.0744364	0.339399	0	0	5.11672	13.2923	GNPDA1;GNPDA2
nucleic acid metabolic process (GO:0090304)	6/71	0.0753734	0.342153	0	0	2.12943	5.50522	HNRNPL;ATXN2;PCBP1;PCBP2;LSM1;MMS19
regulation of hematopoietic stem cell differentiation (GO:1902036)	6/71	0.0753734	0.342153	0	0	2.12943	5.50522	PSMD8;PSMD6;PSMD12;PSMD4;PSMD5;PSMD3
response to metal ion (GO:0010038)	6/71	0.0753734	0.342153	0	0	2.12943	5.50522	PPP2CA;AHCYL1;PDCD6;ALG2;SLC25A12;CALM1
phosphorylation (GO:0016310)	23/400	0.0755833	0.342153	0	0	1.41341	3.65017	RET;SRPK2;DGKE;BMPR2;SPHK2;AGK;STAT3;DYRK1A;LMTK3;AATK;BRAF;NRBP1;BCR;NRBP2;STK11;GRK2;DGKQ;STK26;WNK2;WNK3;STK38L;MARK4;CDK14
amino acid import across plasma membrane (GO:0089718)	3/24	0.0763491	0.342153	0	0	3.29122	8.46645	SLC6A9;SLC1A1;SLC1A4
axon extension (GO:0048675)	3/24	0.0763491	0.342153	0	0	3.29122	8.46645	CYFIP1;USP9X;ULK2
negative regulation of stress fiber assembly (GO:0051497)	3/24	0.0763491	0.342153	0	0	3.29122	8.46645	INPP5K;ARHGAP6;CLASP1
positive regulation of cell-substrate junction organization (GO:0150117)	3/24	0.0763491	0.342153	0	0	3.29122	8.46645	DUSP3;IQSEC1;FERMT2
positive regulation of lamellipodium assembly (GO:0010592)	3/24	0.0763491	0.342153	0	0	3.29122	8.46645	CYFIP1;CARMIL2;ABI2
potassium ion homeostasis (GO:0055075)	3/24	0.0763491	0.342153	0	0	3.29122	8.46645	SLC12A2;ATP1A2;SLC12A6
protein insertion into mitochondrial membrane (GO:0051204)	3/24	0.0763491	0.342153	0	0	3.29122	8.46645	TOMM70;AGK;BAD
protein K48-linked deubiquitination (GO:0071108)	3/24	0.0763491	0.342153	0	0	3.29122	8.46645	USP8;USP5;MINDY2
protein targeting (GO:0006605)	9/125	0.0778412	0.34761	0	0	1.79154	4.57394	TOMM70;BCAP31;RABGEF1;NLGN1;ARL6;VPS37C;KATNB1;VPS37A;GDAP1
regulation of cation channel activity (GO:2001257)	7/89	0.0780218	0.34761	0	0	1.96992	5.0248	CACNB2;NLGN1;CACNB4;HPCA;ANK2;ANK3;CALM1
transforming growth factor beta receptor signaling pathway (GO:0007179)	7/89	0.0780218	0.34761	0	0	1.96992	5.0248	ITGB5;UBB;USP9X;ZYX;CBL;FERMT2;APPL1
positive regulation of intracellular transport (GO:0032388)	4/39	0.0781208	0.34761	0	0	2.63422	6.71593	BCAS3;STK11;EIPR1;MLC1
response to peptide (GO:1901652)	4/39	0.0781208	0.34761	0	0	2.63422	6.71593	STAT5B;STAT1;STAT2;STAT3
protein targeting to mitochondrion (GO:0006626)	5/55	0.0784617	0.348632	0	0	2.30591	5.86888	TOMM70;BCAP31;AGK;GDAP1;TIMM50
neutrophil activation involved in immune response (GO:0002283)	27/485	0.0788097	0.349683	0	0	1.36663	3.47223	CDA;CYFIP1;RAB5B;PSMD12;RAB5C;DDX3X;CAB39;PSEN1;HEBP2;PSMD6;ACTR1B;PSMD3;RAB24;TOM1;CPNE3;CCT8;ATP6V1D;PTGES2;ARMC8;CKAP4;SERPINB6;RAP2C;DIAPH1;CYSTM1;ACTR10;HSPA1B;RAB9B
positive regulation of neurogenesis (GO:0050769)	6/72	0.0794812	0.352164	0	0	2.09706	5.31024	ROBO2;PTPRD;NUMB;PLXNA1;TRIM32;PLXNA4
positive regulation of cell motility (GO:2000147)	14/221	0.079649	0.35241	0	0	1.56372	3.95641	RET;SPAG9;CARMIL2;SEMA4D;SEMA6D;STAT3;ELP3;FGF1;NUMB;CPNE3;PHPT1;WASHC1;TRIM32;FERMT2
sodium ion transport (GO:0006814)	7/90	0.0817265	0.361093	0	0	1.94608	4.87372	SLC12A2;SLC24A3;SLC6A9;SCN8A;ATP1A2;SLC4A4;SLC6A3
neutrophil mediated immunity (GO:0002446)	27/488	0.0833526	0.365264	0	0	1.35752	3.373	CDA;CYFIP1;RAB5B;PSMD12;RAB5C;DDX3X;CAB39;PSEN1;HEBP2;PSMD6;ACTR1B;PSMD3;RAB24;TOM1;CPNE3;CCT8;ATP6V1D;PTGES2;ARMC8;CKAP4;SERPINB6;RAP2C;DIAPH1;CYSTM1;ACTR10;HSPA1B;RAB9B
mitochondrial transport (GO:0006839)	5/56	0.0833529	0.365264	0	0	2.26058	5.6168	TOMM70;BCAP31;BAD;MTX2;GDAP1
peptidyl-tyrosine modification (GO:0018212)	5/56	0.0833529	0.365264	0	0	2.26058	5.6168	EPHA4;ABI2;ERBB4;DYRK1A;ABL2
negative regulation of protein kinase B signaling (GO:0051898)	4/40	0.0840779	0.365264	0	0	2.56091	6.34084	PDCD6;PTEN;INPP5K;PPP2R5C
positive regulation of double-strand break repair (GO:2000781)	4/40	0.0840779	0.365264	0	0	2.56091	6.34084	WDR48;SPIRE1;MMS19;FMN2
negative regulation of actin filament polymerization (GO:0030837)	3/25	0.0841846	0.365264	0	0	3.14145	7.77429	HIP1R;CYRIB;KANK4
negative regulation of ion transport (GO:0043271)	3/25	0.0841846	0.365264	0	0	3.14145	7.77429	WNK2;WNK3;INPP5K
regulation of interferon-alpha production (GO:0032647)	3/25	0.0841846	0.365264	0	0	3.14145	7.77429	DDX3X;IRF3;STAT1
regulation of spindle assembly (GO:0090169)	3/25	0.0841846	0.365264	0	0	3.14145	7.77429	CHMP1A;CHMP4B;HSPA1B
nervous system development (GO:0007399)	25/447	0.0846151	0.365264	0	0	1.37259	3.38981	ROBO2;ACHE;NLGN1;CPNE6;ADAM22;PTEN;SLC2A1;PTS;HAPLN2;MOBP;ERBB4;ADAM23;DVL1;PCDHA4;MARK4;STAT3;DYRK1A;FBXL17;WWP1;ELP3;NAV1;S100B;ADORA2A;SCN8A;KCNQ2
negative regulation of canonical Wnt signaling pathway (GO:0090090)	11/165	0.084916	0.365264	0	0	1.65006	4.0692	PSMD8;PTPRU;AMER2;PSMD6;STK11;PSMD12;PSMD4;PSMD5;PSMD3;DVL1;DVL2
regulation of protein ubiquitination (GO:0031396)	8/109	0.0853735	0.365264	0	0	1.82821	4.4987	DNAJB2;UBB;MYCBP2;UBE3A;STUB1;WASHC1;HSPA1B;UBE2L3
regulation of stem cell differentiation (GO:2000736)	7/91	0.0855308	0.365264	0	0	1.92281	4.72796	PSMD8;PSMD6;PSMD12;PSMD4;PSMD5;SMYD5;PSMD3
amino sugar biosynthetic process (GO:0046349)	2/12	0.0869266	0.365264	0	0	4.60481	11.2481	GNPDA1;GNPDA2
carboxylic acid catabolic process (GO:0046395)	2/12	0.0869266	0.365264	0	0	4.60481	11.2481	GNPDA1;GNPDA2
cell differentiation in hindbrain (GO:0021533)	2/12	0.0869266	0.365264	0	0	4.60481	11.2481	AGTPBP1;FAIM2
cGMP metabolic process (GO:0046068)	2/12	0.0869266	0.365264	0	0	4.60481	11.2481	GUCY2C;GUCY1B1
epithelial cell-cell adhesion (GO:0090136)	2/12	0.0869266	0.365264	0	0	4.60481	11.2481	CAMSAP3;ITGB5
microtubule anchoring (GO:0034453)	2/12	0.0869266	0.365264	0	0	4.60481	11.2481	CAMSAP3;CLASP1
negative regulation of amyloid fibril formation (GO:1905907)	2/12	0.0869266	0.365264	0	0	4.60481	11.2481	VBP1;PFDN6
negative regulation of microtubule polymerization (GO:0031115)	2/12	0.0869266	0.365264	0	0	4.60481	11.2481	DYRK1A;TUBB4A
negative regulation of release of sequestered calcium ion into cytosol (GO:0051280)	2/12	0.0869266	0.365264	0	0	4.60481	11.2481	SRI;CALM1
negative regulation of ryanodine-sensitive calcium-release channel activity (GO:0060315)	2/12	0.0869266	0.365264	0	0	4.60481	11.2481	SRI;CALM1
neurotransmitter uptake (GO:0001504)	2/12	0.0869266	0.365264	0	0	4.60481	11.2481	ATP1A2;GLUL
nuclear body organization (GO:0030575)	2/12	0.0869266	0.365264	0	0	4.60481	11.2481	SRPK2;HABP4
positive regulation of protein localization to chromosome, telomeric region (GO:1904816)	2/12	0.0869266	0.365264	0	0	4.60481	11.2481	CCT6A;CCT8
positive regulation of pseudopodium assembly (GO:0031274)	2/12	0.0869266	0.365264	0	0	4.60481	11.2481	CDC42EP4;WASHC1
presynapse organization (GO:0099172)	2/12	0.0869266	0.365264	0	0	4.60481	11.2481	NLGN1;DVL1
protein insertion into mitochondrial inner membrane (GO:0045039)	2/12	0.0869266	0.365264	0	0	4.60481	11.2481	TOMM70;AGK
purine nucleotide biosynthetic process (GO:0006164)	2/12	0.0869266	0.365264	0	0	4.60481	11.2481	ADSL;GART
regulation of axon regeneration (GO:0048679)	2/12	0.0869266	0.365264	0	0	4.60481	11.2481	EPHA4;INPP5F
regulation of cell communication by electrical coupling involved in cardiac conduction (GO:1901844)	2/12	0.0869266	0.365264	0	0	4.60481	11.2481	SRI;CALM1
regulation of keratinocyte migration (GO:0051547)	2/12	0.0869266	0.365264	0	0	4.60481	11.2481	IQSEC1;PTEN
regulation of muscle system process (GO:0090257)	2/12	0.0869266	0.365264	0	0	4.60481	11.2481	ATP1A2;SRI
regulation of nucleobase-containing compound metabolic process (GO:0019219)	2/12	0.0869266	0.365264	0	0	4.60481	11.2481	PCBP1;PCBP2
regulation of pseudopodium assembly (GO:0031272)	2/12	0.0869266	0.365264	0	0	4.60481	11.2481	CDC42EP4;WASHC1
post-translational protein modification (GO:0043687)	20/345	0.0869786	0.365264	0	0	1.42438	3.47847	FN3K;PSMD12;FBXO2;SDC2;CUL2;FN3KRP;COPS7A;MIA3;FBXO41;CKAP4;PSMD8;PSMD6;COPS6;COPS5;PSMD4;PSMD5;PSMD3;STT3A;RAB5A;UBE2M
NIK/NF-kappaB signaling (GO:0038061)	6/74	0.0880653	0.369333	0	0	2.03517	4.9448	PSMD8;PSMD6;PSMD12;PSMD4;PSMD5;PSMD3
positive regulation of proteolysis (GO:0045862)	5/57	0.0884014	0.370247	0	0	2.21699	5.37812	CYFIP2;WDR48;BAD;STUB1;TRIM32
Wnt signaling pathway (GO:0016055)	7/92	0.0894345	0.374075	0	0	1.90009	4.5873	DDX3X;UBB;ARL6;DVL1;PTEN;DVL2;FERMT2
import into cell (GO:0098657)	4/41	0.0902501	0.374986	0	0	2.49157	5.99264	LRSAM1;ATP1A2;SLC12A6;GLUL
positive regulation of cation transmembrane transport (GO:1904064)	4/41	0.0902501	0.374986	0	0	2.49157	5.99264	KCNJ6;ANK2;KCNN3;ANK3
regulation of filopodium assembly (GO:0051489)	4/41	0.0902501	0.374986	0	0	2.49157	5.99264	BCAS3;NLGN1;DMTN;RAB5A
regulation of mitochondrial membrane potential (GO:0051881)	4/41	0.0902501	0.374986	0	0	2.49157	5.99264	SPART;HEBP2;UBB;BAD
response to growth factor (GO:0070848)	4/41	0.0902501	0.374986	0	0	2.49157	5.99264	STAT5B;BMPR2;CPNE3;HDAC6
positive regulation of programmed cell death (GO:0043068)	17/286	0.0911995	0.37843	0	0	1.46173	3.50042	MTCH1;MTCH2;TRIO;DDX3X;ARHGEF12;SPHK2;BAD;RASGRF2;HIP1R;PSEN1;HDAC6;PTPA;ABR;PIDD1;UBB;MARK4;SLC27A4
clathrin-dependent endocytosis (GO:0072583)	3/26	0.0923471	0.380469	0	0	3.00471	7.15782	INPP5F;DNAJC6;AP2A1
negative regulation of signaling receptor activity (GO:2000272)	3/26	0.0923471	0.380469	0	0	3.00471	7.15782	SLC6A9;CBL;SNX6
positive regulation of G1/S transition of mitotic cell cycle (GO:1900087)	3/26	0.0923471	0.380469	0	0	3.00471	7.15782	RPTOR;DDX3X;EIF4G1
positive regulation of microtubule polymerization or depolymerization (GO:0031112)	3/26	0.0923471	0.380469	0	0	3.00471	7.15782	KATNB1;SLAIN2;CLASP1
purine-containing compound biosynthetic process (GO:0072522)	3/26	0.0923471	0.380469	0	0	3.00471	7.15782	ADAL;ADSL;GART
regulation of protein serine/threonine kinase activity (GO:0071900)	8/111	0.0925086	0.380469	0	0	1.79252	4.26701	RPTOR;PPP2CA;UVRAG;DDX3X;CAB39;SYAP1;CALM1;ACTB
regulation of hematopoietic progenitor cell differentiation (GO:1901532)	6/75	0.0925399	0.380469	0	0	2.00557	4.77348	PSMD8;PSMD6;PSMD12;PSMD4;PSMD5;PSMD3
regulation of heart contraction (GO:0008016)	7/93	0.0934371	0.383655	0	0	1.8779	4.4515	AHCYL1;STIM1;TH;ANK2;ATP1A2;SRI;CALM1
positive regulation of hydrolase activity (GO:0051345)	10/149	0.094065	0.385728	0	0	1.66122	3.92675	AFDN;BCAS3;RALBP1;SEMA4D;MTMR9;RAB11FIP2;CALM1;RGS6;RAP1GAP;FERMT2
cilium organization (GO:0044782)	14/228	0.0964917	0.391434	0	0	1.51201	3.53554	IQCB1;ARL6;SEPTIN6;SEPTIN7;HDAC6;WDR11;ABLIM1;EHD4;ABLIM3;RP2;KIFAP3;ATP6V0D1;MARK4;ATP6V1D
potassium ion import across plasma membrane (GO:1990573)	4/42	0.0966327	0.391434	0	0	2.42587	5.66887	SLC12A2;KCNJ6;ATP1A2;SLC12A6
actomyosin structure organization (GO:0031032)	6/76	0.097135	0.391434	0	0	1.97681	4.60924	ITGB5;EPB41L2;EPB41L3;ZYX;PHACTR1;CIT
chloride transport (GO:0006821)	6/76	0.097135	0.391434	0	0	1.97681	4.60924	SLC12A2;GABRB2;CLCN6;TTYH3;SLC1A1;SLC12A6
positive regulation of growth (GO:0045927)	6/76	0.097135	0.391434	0	0	1.97681	4.60924	RPTOR;USP47;DDX3X;RPS6KA1;TRIM32;EIF4G1
regulation of cell division (GO:0051302)	6/76	0.097135	0.391434	0	0	1.97681	4.60924	UVRAG;SMYD5;CETN2;FSD1;FGF1;CALM1
cellular response to organic cyclic compound (GO:0071407)	10/150	0.0972435	0.391434	0	0	1.64927	3.84369	DIAPH1;GABRB2;LARP1;DMTN;SLC1A1;INPP5K;ATP1A2;ADCY1;ACTB;UBE2L3
negative regulation of cellular protein metabolic process (GO:0032269)	7/94	0.097538	0.391434	0	0	1.85622	4.32037	DDX6;RIDA;DDX3X;LARP1;CAMK2N1;CPEB3;HDAC6
negative regulation of MAPK cascade (GO:0043409)	7/94	0.097538	0.391434	0	0	1.85622	4.32037	SPRED3;DUSP3;CAMK2N1;WNK2;PTEN;INPP5K;RANBP9
positive regulation of epithelial cell migration (GO:0010634)	7/94	0.097538	0.391434	0	0	1.85622	4.32037	BCAS3;BMPR2;IQSEC1;PDCD6;FGF1;HDAC6;CLASP1
AMP metabolic process (GO:0046033)	2/13	0.0999852	0.391434	0	0	4.18597	9.63917	ADSL;ADSS2
atrial cardiac muscle cell action potential (GO:0086014)	2/13	0.0999852	0.391434	0	0	4.18597	9.63917	CACNB2;ANK2
cellular potassium ion homeostasis (GO:0030007)	2/13	0.0999852	0.391434	0	0	4.18597	9.63917	SLC12A2;ATP1A2
cellular response to interleukin-15 (GO:0071350)	2/13	0.0999852	0.391434	0	0	4.18597	9.63917	STAT5B;STAT3
cytoplasmic sequestering of protein (GO:0051220)	2/13	0.0999852	0.391434	0	0	4.18597	9.63917	GOPC;GET4
detection of calcium ion (GO:0005513)	2/13	0.0999852	0.391434	0	0	4.18597	9.63917	STIM1;CALM1
glucan biosynthetic process (GO:0009250)	2/13	0.0999852	0.391434	0	0	4.18597	9.63917	GBE1;PGM2L1
glucose import (GO:0046323)	2/13	0.0999852	0.391434	0	0	4.18597	9.63917	SLC2A1;SLC27A4
glycogen biosynthetic process (GO:0005978)	2/13	0.0999852	0.391434	0	0	4.18597	9.63917	GBE1;PGM2L1
interleukin-15-mediated signaling pathway (GO:0035723)	2/13	0.0999852	0.391434	0	0	4.18597	9.63917	STAT5B;STAT3
mitochondrial outer membrane permeabilization (GO:0097345)	2/13	0.0999852	0.391434	0	0	4.18597	9.63917	RHOT1;BAD
mitochondrion transport along microtubule (GO:0047497)	2/13	0.0999852	0.391434	0	0	4.18597	9.63917	RHOT1;UBB
negative regulation of epidermal growth factor-activated receptor activity (GO:0007175)	2/13	0.0999852	0.391434	0	0	4.18597	9.63917	CBL;SNX6
negative regulation of reactive oxygen species biosynthetic process (GO:1903427)	2/13	0.0999852	0.391434	0	0	4.18597	9.63917	MPV17L;SLC18A2
positive regulation of ERAD pathway (GO:1904294)	2/13	0.0999852	0.391434	0	0	4.18597	9.63917	BCAP31;UBQLN2
positive regulation of nuclear-transcribed mRNA poly(A) tail shortening (GO:0060213)	2/13	0.0999852	0.391434	0	0	4.18597	9.63917	AGO2;CPEB3
positive regulation of ruffle assembly (GO:1900029)	2/13	0.0999852	0.391434	0	0	4.18597	9.63917	CARMIL2;NLGN1
protein localization to mitochondrion (GO:0070585)	2/13	0.0999852	0.391434	0	0	4.18597	9.63917	MTCH2;MARCHF5
regulation of oxidoreductase activity (GO:0051341)	2/13	0.0999852	0.391434	0	0	4.18597	9.63917	ABL2;HDAC6
regulation of retrograde protein transport, ER to cytosol (GO:1904152)	2/13	0.0999852	0.391434	0	0	4.18597	9.63917	BCAP31;UBE2J1
reticulophagy (GO:0061709)	2/13	0.0999852	0.391434	0	0	4.18597	9.63917	ULK2;ATG2B
semaphorin-plexin signaling pathway involved in neuron projection guidance (GO:1902285)	2/13	0.0999852	0.391434	0	0	4.18597	9.63917	PLXNA1;PLXNA4
sodium ion export across plasma membrane (GO:0036376)	2/13	0.0999852	0.391434	0	0	4.18597	9.63917	ATP1A2;SLC4A4
transport along microtubule (GO:0010970)	2/13	0.0999852	0.391434	0	0	4.18597	9.63917	CAMSAP3;ARHGAP21
UDP-N-acetylglucosamine metabolic process (GO:0006047)	2/13	0.0999852	0.391434	0	0	4.18597	9.63917	GNPDA1;GNPDA2
bile acid biosynthetic process (GO:0006699)	3/27	0.100822	0.391434	0	0	2.87936	6.60641	OSBPL9;OSBP;OSBPL2
dendritic spine organization (GO:0097061)	3/27	0.100822	0.391434	0	0	2.87936	6.60641	ITGA3;PTEN;DIP2A
melanosome organization (GO:0032438)	3/27	0.100822	0.391434	0	0	2.87936	6.60641	AP1G1;AP3D1;LYST
monovalent inorganic cation homeostasis (GO:0055067)	3/27	0.100822	0.391434	0	0	2.87936	6.60641	SLC12A2;SLC9A7;SLC12A6
negative regulation of actin filament bundle assembly (GO:0032232)	3/27	0.100822	0.391434	0	0	2.87936	6.60641	INPP5K;ARHGAP6;CLASP1
negative regulation of insulin receptor signaling pathway (GO:0046627)	3/27	0.100822	0.391434	0	0	2.87936	6.60641	INPP5K;NCK1;SLC27A4
positive regulation of cellular component movement (GO:0051272)	3/27	0.100822	0.391434	0	0	2.87936	6.60641	STK11;PHPT1;TRIM32
protein export from nucleus (GO:0006611)	3/27	0.100822	0.391434	0	0	2.87936	6.60641	CSE1L;XPO5;XPO7
ciliary basal body-plasma membrane docking (GO:0097711)	7/95	0.101736	0.393474	0	0	1.83503	4.19372	IQCB1;PPP2R1A;CETN2;MARK4;CKAP5;TUBB4A;CLASP1
regulation of cell cycle phase transition (GO:1901987)	7/95	0.101736	0.393474	0	0	1.83503	4.19372	PSMD8;PSMD6;PSMD12;PSMD4;PSMD5;CDC26;PSMD3
inorganic cation import across plasma membrane (GO:0098659)	6/77	0.101849	0.393474	0	0	1.94887	4.45172	SLC12A2;KCNJ6;SLC9A7;SLC39A10;ATP1A2;SLC12A6
positive regulation of protein modification by small protein conjugation or removal (GO:1903322)	6/77	0.101849	0.393474	0	0	1.94887	4.45172	WDR48;UBB;MYCBP2;UBE3A;STUB1;UBE2L3
negative regulation of proteolysis (GO:0045861)	4/43	0.10322	0.397792	0	0	2.36355	5.36735	EPHA4;CAMK2N1;SNX12;HDAC6
positive regulation of axonogenesis (GO:0050772)	4/43	0.10322	0.397792	0	0	2.36355	5.36735	ROBO2;SEMA4D;PLXNA1;PLXNA4
apoptotic process (GO:0006915)	14/231	0.104335	0.401594	0	0	1.49087	3.36959	CYFIP2;AHCYL1;BAD;YARS1;CIT;PPP2CA;BCL2L13;PIDD1;STK11;RRAGC;ADORA2A;IRF3;PPP2R1A;CDIP1
calcium ion transport (GO:0006816)	8/115	0.107771	0.413297	0	0	1.72515	3.84319	CHRNB2;CACNB2;TRPC6;SLC24A3;STIM1;CHRNA4;ANK2;PSEN1
cellular response to lectin (GO:1990858)	8/115	0.107771	0.413297	0	0	1.72515	3.84319	PSMD8;PSMD6;PSMD12;PSMD4;PSMD5;PSMD3;TAB3;TAB1
stimulatory C-type lectin receptor signaling pathway (GO:0002223)	8/115	0.107771	0.413297	0	0	1.72515	3.84319	PSMD8;PSMD6;PSMD12;PSMD4;PSMD5;PSMD3;TAB3;TAB1
cellular response to interleukin-6 (GO:0071354)	3/28	0.109594	0.415715	0	0	2.76404	6.11123	STAT1;STAT3;CBL
negative regulation of axonogenesis (GO:0050771)	3/28	0.109594	0.415715	0	0	2.76404	6.11123	PTEN;ULK2;DIP2B
negative regulation of cellular response to insulin stimulus (GO:1900077)	3/28	0.109594	0.415715	0	0	2.76404	6.11123	INPP5K;NCK1;SLC27A4
negative regulation of phosphatase activity (GO:0010923)	3/28	0.109594	0.415715	0	0	2.76404	6.11123	PTPA;SEMA4D;PPP4R4
positive regulation of synapse assembly (GO:0051965)	3/28	0.109594	0.415715	0	0	2.76404	6.11123	PTPRD;NLGN1;SEMA4D
protein localization to cell surface (GO:0034394)	3/28	0.109594	0.415715	0	0	2.76404	6.11123	PTPRU;GGA3;ANK2
regulation of DNA damage response, signal transduction by p53 class mediator (GO:0043516)	3/28	0.109594	0.415715	0	0	2.76404	6.11123	SPRED3;DDX5;DYRK1A
regulation of plasma membrane bounded cell projection organization (GO:0120035)	3/28	0.109594	0.415715	0	0	2.76404	6.11123	PTEN;PSEN1;CTNNA2
regulation of protein transport (GO:0051223)	3/28	0.109594	0.415715	0	0	2.76404	6.11123	SNX12;GAPVD1;STXBP5L
intracellular protein transmembrane transport (GO:0065002)	4/44	0.110008	0.416277	0	0	2.30434	5.08615	RTN2;TOMM70;C2CD5;TIMM50
mRNA catabolic process (GO:0006402)	4/44	0.110008	0.416277	0	0	2.30434	5.08615	UPF1;DDX5;RIDA;HSPA1B
inorganic cation transmembrane transport (GO:0098662)	16/274	0.110858	0.418548	0	0	1.43348	3.15295	ATP6V1A;SLC12A2;TRPC6;SLC24A3;KCND3;ATP1A2;SLC4A4;SLC6A3;ATP5F1B;SLC6A9;SLC9A7;SCN8A;KCNQ2;ATP6V1H;KCNN3;ATP6V0D1
cation transport (GO:0006812)	11/174	0.112099	0.418548	0	0	1.55822	3.40995	SLC12A2;KCNJ6;TRPC6;SLC6A9;KCND3;SCN8A;SLC1A1;ATP1A2;SLC4A4;SLC6A3;SLC18A2
cellular response to tumor necrosis factor (GO:0071356)	12/194	0.112809	0.418548	0	0	1.52274	3.32272	PSMD8;PSMD6;PSMD12;BAG4;PSMD4;PSMD5;STAT1;TRAF3;PSMD3;CDIP1;INPP5K;GSDME
activation of cysteine-type endopeptidase activity (GO:0097202)	2/14	0.113543	0.418548	0	0	3.83694	8.34754	CYFIP2;BAD
amyloid precursor protein catabolic process (GO:0042987)	2/14	0.113543	0.418548	0	0	3.83694	8.34754	DYRK1A;PSEN1
aorta development (GO:0035904)	2/14	0.113543	0.418548	0	0	3.83694	8.34754	ROBO2;HECTD1
atrial septum development (GO:0003283)	2/14	0.113543	0.418548	0	0	3.83694	8.34754	BMPR2;ANK2
cAMP metabolic process (GO:0046058)	2/14	0.113543	0.418548	0	0	3.83694	8.34754	ADCY9;ADCY1
growth hormone receptor signaling pathway via JAK-STAT (GO:0060397)	2/14	0.113543	0.418548	0	0	3.83694	8.34754	STAT5B;STAT3
negative regulation of TORC1 signaling (GO:1904262)	2/14	0.113543	0.418548	0	0	3.83694	8.34754	STK11;CASTOR2
negative regulation of viral transcription (GO:0032897)	2/14	0.113543	0.418548	0	0	3.83694	8.34754	UBP1;TRIM32
nuclear migration (GO:0007097)	2/14	0.113543	0.418548	0	0	3.83694	8.34754	DOCK7;HOOK3
polarized epithelial cell differentiation (GO:0030859)	2/14	0.113543	0.418548	0	0	3.83694	8.34754	CAMSAP3;RAP2A
positive regulation of leukocyte degranulation (GO:0043302)	2/14	0.113543	0.418548	0	0	3.83694	8.34754	SPHK2;AP1G1
positive regulation of transmembrane transport (GO:0034764)	2/14	0.113543	0.418548	0	0	3.83694	8.34754	C2CD5;BRAF
protein maturation by iron-sulfur cluster transfer (GO:0097428)	2/14	0.113543	0.418548	0	0	3.83694	8.34754	BOLA2;MMS19
regulation of lamellipodium organization (GO:1902743)	2/14	0.113543	0.418548	0	0	3.83694	8.34754	CARMIL2;DMTN
regulation of protein kinase C signaling (GO:0090036)	2/14	0.113543	0.418548	0	0	3.83694	8.34754	SPHK2;GPD1L
regulation of trophoblast cell migration (GO:1901163)	2/14	0.113543	0.418548	0	0	3.83694	8.34754	YTHDF3;AGO2
respiratory electron transport chain (GO:0022904)	2/14	0.113543	0.418548	0	0	3.83694	8.34754	SLC25A12;SLC25A22
substrate-dependent cell migration (GO:0006929)	2/14	0.113543	0.418548	0	0	3.83694	8.34754	ANKS1A;CD2AP
tRNA wobble base modification (GO:0002097)	2/14	0.113543	0.418548	0	0	3.83694	8.34754	CTU2;ELP3
RNA splicing (GO:0008380)	7/98	0.11491	0.423088	0	0	1.77425	3.83879	SRPK2;PPP2CA;RRAGC;PPP2R1A;LSM1;MPHOSPH10;NOL3
organic substance transport (GO:0071702)	9/136	0.11544	0.424543	0	0	1.63542	3.53088	SCAMP4;SNX4;CHMP1A;TOM1;MIA3;SCAMP3;SLC6A3;SLC18A2;ABCG2
positive regulation of cysteine-type endopeptidase activity (GO:2001056)	5/62	0.115927	0.424839	0	0	2.02199	4.35698	CYFIP2;BCAP31;DDX3X;BAD;PDCD6
regulation of neurogenesis (GO:0050767)	5/62	0.115927	0.424839	0	0	2.02199	4.35698	DOCK7;NUMB;PRUNE1;HOOK3;TRIM32
stress-activated MAPK cascade (GO:0051403)	5/62	0.115927	0.424839	0	0	2.02199	4.35698	MAP2K4;UBB;TAB3;UBE2V1;TAB1
negative regulation of cell cycle (GO:0045786)	6/80	0.116693	0.426241	0	0	1.86957	4.01621	PPP1R13B;CAMK2N1;CHMP1A;PTEN;IPO7;IPO5
action potential (GO:0001508)	4/45	0.116989	0.426241	0	0	2.24802	4.82352	CHRNA4;SCN8A;SRI;ANK3
neural crest cell development (GO:0014032)	4/45	0.116989	0.426241	0	0	2.24802	4.82352	SEMA4D;ERBB4;PDCD6;SEMA6D
positive regulation of nervous system development (GO:0051962)	4/45	0.116989	0.426241	0	0	2.24802	4.82352	PTPRD;NLGN1;NUMB;TRIM32
regulation of insulin receptor signaling pathway (GO:0046626)	4/45	0.116989	0.426241	0	0	2.24802	4.82352	INPP5K;SNX5;NCK1;SLC27A4
dicarboxylic acid transport (GO:0006835)	3/29	0.118648	0.428799	0	0	2.6576	5.66492	SLC1A1;SLC25A12;SLC25A22
MyD88-dependent toll-like receptor signaling pathway (GO:0002755)	3/29	0.118648	0.428799	0	0	2.6576	5.66492	UBB;TAB3;TAB1
negative regulation of epithelial to mesenchymal transition (GO:0010719)	3/29	0.118648	0.428799	0	0	2.6576	5.66492	PPP2CA;SPRED3;PTEN
negative regulation of mRNA catabolic process (GO:1902373)	3/29	0.118648	0.428799	0	0	2.6576	5.66492	LARP1;ELAVL1;PAIP1
negative regulation of transferase activity (GO:0051348)	3/29	0.118648	0.428799	0	0	2.6576	5.66492	INPP5K;PHPT1;CERS1
negative regulation of wound healing (GO:0061045)	3/29	0.118648	0.428799	0	0	2.6576	5.66492	SLC12A2;PTEN;CLASP1
regulation of response to biotic stimulus (GO:0002831)	3/29	0.118648	0.428799	0	0	2.6576	5.66492	TRAF3;ZMPSTE24;APPL1
organonitrogen compound catabolic process (GO:1901565)	5/63	0.12187	0.439432	0	0	1.98702	4.18229	NPEPPS;LRSAM1;RIDA;GNPDA1;GNPDA2
positive regulation of viral process (GO:0048524)	5/63	0.12187	0.439432	0	0	1.98702	4.18229	SRPK2;DDX3X;LARP1;KPNA6;HACD3
spliceosomal complex assembly (GO:0000245)	4/46	0.124157	0.441136	0	0	2.19438	4.57793	SRPK2;SRSF1;CELF4;NOL3
cell-matrix adhesion (GO:0007160)	7/100	0.124163	0.441136	0	0	1.73592	3.62139	BCR;ITGB5;CTTN;ITGA3;ZYX;FERMT2;PPFIA2
organic acid transport (GO:0015849)	7/100	0.124163	0.441136	0	0	1.73592	3.62139	SLC10A4;SLC43A2;SLC7A14;SLC1A4;SLC38A3;ABCG2;SLC27A4
innate immune response activating cell surface receptor signaling pathway (GO:0002220)	8/119	0.124329	0.441136	0	0	1.66263	3.4663	PSMD8;PSMD6;PSMD12;PSMD4;PSMD5;PSMD3;TAB3;TAB1
positive regulation of cysteine-type endopeptidase activity involved in apoptotic process (GO:0043280)	8/119	0.124329	0.441136	0	0	1.66263	3.4663	BCAP31;MTCH1;BCL2L13;PIDD1;DDX3X;BAD;PDCD6;HIP1R
positive regulation of protein ubiquitination (GO:0031398)	6/82	0.127157	0.441136	0	0	1.82018	3.75381	UBB;PDCD6;MYCBP2;UBE3A;STUB1;UBE2L3
regulation of G protein-coupled receptor signaling pathway (GO:0008277)	6/82	0.127157	0.441136	0	0	1.82018	3.75381	RGS3;GNG4;DGKQ;RGS20;CALM1;RGS6
potassium ion transmembrane transport (GO:0071805)	9/139	0.127169	0.441136	0	0	1.59743	3.29427	SLC12A2;KCNJ6;SLC24A3;SLC9A7;KCND3;KCNQ2;ATP1A2;KCNN3;SLC12A6
androgen receptor signaling pathway (GO:0030521)	2/15	0.127536	0.441136	0	0	3.54161	7.29343	DDX5;RNF14
Arp2/3 complex-mediated actin nucleation (GO:0034314)	2/15	0.127536	0.441136	0	0	3.54161	7.29343	ARPC4;WASHC1
catecholamine metabolic process (GO:0006584)	2/15	0.127536	0.441136	0	0	3.54161	7.29343	DDC;TH
cellular response to estrogen stimulus (GO:0071391)	2/15	0.127536	0.441136	0	0	3.54161	7.29343	BCAS3;SRA1
cellular sodium ion homeostasis (GO:0006883)	2/15	0.127536	0.441136	0	0	3.54161	7.29343	SLC12A2;ATP1A2
establishment of apical/basal cell polarity (GO:0035089)	2/15	0.127536	0.441136	0	0	3.54161	7.29343	CAMSAP3;RAP2A
G protein-coupled glutamate receptor signaling pathway (GO:0007216)	2/15	0.127536	0.441136	0	0	3.54161	7.29343	HOMER2;GRM1
heterocycle biosynthetic process (GO:0018130)	2/15	0.127536	0.441136	0	0	3.54161	7.29343	GCH1;PYCR3
histone mRNA catabolic process (GO:0071044)	2/15	0.127536	0.441136	0	0	3.54161	7.29343	UPF1;LSM1
interleukin-27-mediated signaling pathway (GO:0070106)	2/15	0.127536	0.441136	0	0	3.54161	7.29343	STAT1;STAT3
nitric oxide biosynthetic process (GO:0006809)	2/15	0.127536	0.441136	0	0	3.54161	7.29343	GCH1;MTARC2
peptidyl-tyrosine autophosphorylation (GO:0038083)	2/15	0.127536	0.441136	0	0	3.54161	7.29343	DYRK1A;AATK
positive regulation of DNA damage response, signal transduction by p53 class mediator (GO:0043517)	2/15	0.127536	0.441136	0	0	3.54161	7.29343	SPRED3;DDX5
positive regulation of double-strand break repair via homologous recombination (GO:1905168)	2/15	0.127536	0.441136	0	0	3.54161	7.29343	WDR48;MMS19
positive regulation of nuclear-transcribed mRNA catabolic process, deadenylation-dependent decay (GO:1900153)	2/15	0.127536	0.441136	0	0	3.54161	7.29343	AGO2;CPEB3
positive regulation of telomerase RNA localization to Cajal body (GO:1904874)	2/15	0.127536	0.441136	0	0	3.54161	7.29343	CCT6A;CCT8
prostanoid biosynthetic process (GO:0046457)	2/15	0.127536	0.441136	0	0	3.54161	7.29343	PRXL2B;PTGDS
regulation of establishment of protein localization (GO:0070201)	2/15	0.127536	0.441136	0	0	3.54161	7.29343	GAPVD1;CORO2B
regulation of extracellular matrix disassembly (GO:0010715)	2/15	0.127536	0.441136	0	0	3.54161	7.29343	CARMIL2;CLASP1
regulation of neuron projection arborization (GO:0150011)	2/15	0.127536	0.441136	0	0	3.54161	7.29343	DVL1;DVL2
regulation of nuclear-transcribed mRNA catabolic process, deadenylation-dependent decay (GO:1900151)	2/15	0.127536	0.441136	0	0	3.54161	7.29343	AGO2;CPEB3
regulation of nuclear-transcribed mRNA poly(A) tail shortening (GO:0060211)	2/15	0.127536	0.441136	0	0	3.54161	7.29343	AGO2;CPEB3
response to ethanol (GO:0045471)	2/15	0.127536	0.441136	0	0	3.54161	7.29343	CHRNB2;TH
tRNA splicing, via endonucleolytic cleavage and ligation (GO:0006388)	2/15	0.127536	0.441136	0	0	3.54161	7.29343	CSTF2;ZBTB8OS
protein catabolic process (GO:0030163)	5/64	0.127952	0.441136	0	0	1.95324	4.01606	ATE1;LRSAM1;DDI2;FBXO2;OGA
regulation of cilium assembly (GO:1902017)	5/64	0.127952	0.441136	0	0	1.95324	4.01606	TBC1D5;TBC1D24;MARK4;TBC1D15;TBC1D10B
cardiac muscle cell action potential (GO:0086001)	3/30	0.127967	0.441136	0	0	2.55903	5.26132	KCND3;ATP1A2;ANK2
Golgi to plasma membrane protein transport (GO:0043001)	3/30	0.127967	0.441136	0	0	2.55903	5.26132	GGA3;ANK3;SPTBN1
mRNA splice site selection (GO:0006376)	3/30	0.127967	0.441136	0	0	2.55903	5.26132	SRSF1;CELF4;NOL3
regulation of long-term synaptic potentiation (GO:1900271)	3/30	0.127967	0.441136	0	0	2.55903	5.26132	EPHA4;YTHDF1;ADCY1
regulation of protein localization to membrane (GO:1905475)	3/30	0.127967	0.441136	0	0	2.55903	5.26132	ACTB;SPTBN1;APPL1
regulation of type I interferon-mediated signaling pathway (GO:0060338)	3/30	0.127967	0.441136	0	0	2.55903	5.26132	YTHDF3;STAT2;UBE2K
positive regulation of protein localization to membrane (GO:1905477)	7/101	0.128928	0.44396	0	0	1.71736	3.51801	C2CD5;PPP1R13B;ITGA3;BAD;WNK3;ANK3;SPTBN1
negative regulation of cold-induced thermogenesis (GO:0120163)	4/47	0.131507	0.452343	0	0	2.14323	4.34797	STK11;DOCK7;ALDH1A1;MAP2K6
regulated exocytosis (GO:0045055)	11/180	0.132695	0.455932	0	0	1.50242	3.03443	TMX3;APOOL;HABP4;PCYOX1L;RAB11FIP2;CYRIB;CALM1;SYNGR3;SYT7;RAB11FIP5;SYT17
MAPK cascade (GO:0000165)	17/303	0.132972	0.456382	0	0	1.37361	2.77141	RET;PSMD12;RASGRF2;RANBP9;BRAF;FGF1;FRS3;SPTB;PSMD8;PSMD6;PSMD4;UBB;PSMD5;ERBB4;PSMD3;CALM1;SPTBN1
cellular nitrogen compound biosynthetic process (GO:0044271)	3/31	0.137537	0.467955	0	0	2.46751	4.89519	MTARC2;GCH1;SPHK2
negative regulation of axon extension (GO:0030517)	3/31	0.137537	0.467955	0	0	2.46751	4.89519	SEMA4D;SEMA6D;DIP2B
organelle transport along microtubule (GO:0072384)	3/31	0.137537	0.467955	0	0	2.46751	4.89519	ARHGAP21;RHOT1;UBB
prostaglandin metabolic process (GO:0006693)	3/31	0.137537	0.467955	0	0	2.46751	4.89519	PRXL2B;PTGDS;PTGR2
regulation of calcium ion-dependent exocytosis (GO:0017158)	3/31	0.137537	0.467955	0	0	2.46751	4.89519	SYT7;CBARP;SYT17
regulation of cellular component size (GO:0032535)	3/31	0.137537	0.467955	0	0	2.46751	4.89519	RPTOR;RAP1GAP2;PTEN
regulation of cellular pH (GO:0030641)	3/31	0.137537	0.467955	0	0	2.46751	4.89519	ATP5F1B;SLC9A7;SLC4A4
renal water homeostasis (GO:0003091)	3/31	0.137537	0.467955	0	0	2.46751	4.89519	ADCY9;ADCY1;RAB11FIP2
cellular response to alcohol (GO:0097306)	4/48	0.139031	0.471503	0	0	2.09441	4.1324	LARP1;SPHK2;MLC1;ADCY1
cognition (GO:0050890)	4/48	0.139031	0.471503	0	0	2.09441	4.1324	CHRNB2;CYFIP1;CHRNA4;SLC1A4
establishment of protein localization to mitochondrion (GO:0072655)	4/48	0.139031	0.471503	0	0	2.09441	4.1324	BCAP31;TOMM70;GDAP1;TIMM50
protein localization to organelle (GO:0033365)	9/142	0.139506	0.472604	0	0	1.56115	3.07491	MTCH2;DDX3X;ARL6;DVL1;ANK2;ATP6V1D;GET4;RAB33B;MARCHF5
positive regulation of cell cycle (GO:0045787)	5/66	0.14052	0.474578	0	0	1.889	3.70699	SRPK2;DUSP3;CCNY;TRIM32;USP19
3'-UTR-mediated mRNA destabilization (GO:0061158)	2/16	0.141904	0.474578	0	0	3.28846	6.42106	UPF1;CPEB3
autophagy of nucleus (GO:0044804)	2/16	0.141904	0.474578	0	0	3.28846	6.42106	ULK2;ATG2B
dendritic spine morphogenesis (GO:0060997)	2/16	0.141904	0.474578	0	0	3.28846	6.42106	PTEN;DIP2A
Golgi to endosome transport (GO:0006895)	2/16	0.141904	0.474578	0	0	3.28846	6.42106	VPS13C;AP2A1
membrane repolarization (GO:0086009)	2/16	0.141904	0.474578	0	0	3.28846	6.42106	KCND3;ATP1A2
negative regulation of type I interferon-mediated signaling pathway (GO:0060339)	2/16	0.141904	0.474578	0	0	3.28846	6.42106	YTHDF3;STAT2
nitric oxide metabolic process (GO:0046209)	2/16	0.141904	0.474578	0	0	3.28846	6.42106	GCH1;MTARC2
regulation of establishment of cell polarity (GO:2000114)	2/16	0.141904	0.474578	0	0	3.28846	6.42106	BCAS3;CYRIB
regulation of phosphate metabolic process (GO:0019220)	2/16	0.141904	0.474578	0	0	3.28846	6.42106	TIGAR;PSEN1
response to organophosphorus (GO:0046683)	2/16	0.141904	0.474578	0	0	3.28846	6.42106	STAT1;DGKQ
RNA splicing, via endonucleolytic cleavage and ligation (GO:0000394)	2/16	0.141904	0.474578	0	0	3.28846	6.42106	CSTF2;ZBTB8OS
retrograde vesicle-mediated transport, Golgi to endoplasmic reticulum (GO:0006890)	6/85	0.143667	0.479961	0	0	1.75078	3.39696	ARF3;UVRAG;KLC2;KIFAP3;RAB6B;ATP9A
regulation of interferon-beta production (GO:0032648)	4/49	0.146723	0.488594	0	0	2.04776	3.93009	TOMM70;DDX3X;IRF3;TRAF3
metal ion export (GO:0070839)	3/32	0.147341	0.488594	0	0	2.3823	4.56211	KCND3;ATP1A2;SLC4A4
negative regulation of developmental growth (GO:0048640)	3/32	0.147341	0.488594	0	0	2.3823	4.56211	PTEN;ULK2;DIP2B
positive regulation of lamellipodium organization (GO:1902745)	3/32	0.147341	0.488594	0	0	2.3823	4.56211	CYFIP1;CARMIL2;ABI2
protein K63-linked deubiquitination (GO:0070536)	3/32	0.147341	0.488594	0	0	2.3823	4.56211	USP8;SPATA2;ABRAXAS2
regulation of cell morphogenesis (GO:0022604)	3/32	0.147341	0.488594	0	0	2.3823	4.56211	STRIP1;PDZD8;FERMT2
regulation of cellular amide metabolic process (GO:0034248)	3/32	0.147341	0.488594	0	0	2.3823	4.56211	CYFIP1;ATXN2;TIGAR
positive regulation of endothelial cell migration (GO:0010595)	6/86	0.149379	0.494827	0	0	1.7288	3.28692	BCAS3;ATP5F1A;BMPR2;ATP5F1B;PDCD6;FGF1
regulation of protein secretion (GO:0050708)	8/125	0.15149	0.501292	0	0	1.57687	2.97593	SLC12A2;ACHE;EIPR1;SLC2A1;FRMD4A;SYT7;CD2AP;STXBP5L
positive regulation of protein localization to nucleus (GO:1900182)	5/68	0.153603	0.506309	0	0	1.82884	3.42613	CCT6A;PSEN1;CCT8;FERMT2;IPO5
regulation of tyrosine phosphorylation of STAT protein (GO:0042509)	5/68	0.153603	0.506309	0	0	1.82884	3.42613	PPP2CA;INPP5F;PPP2R1A;ERBB4;STAT3
regulation of cell cycle process (GO:0010564)	7/106	0.154081	0.506309	0	0	1.6302	3.04892	UVRAG;CETN2;FSD1;MARK4;CALM1;MAD1L1;USP19
amino acid transport (GO:0006865)	4/50	0.154575	0.506309	0	0	2.00314	3.74001	SLC43A2;SLC7A14;SLC1A4;SLC38A3
chloride transmembrane transport (GO:1902476)	4/50	0.154575	0.506309	0	0	2.00314	3.74001	SLC12A2;GABRB2;SLC1A1;SLC12A6
neuron migration (GO:0001764)	4/50	0.154575	0.506309	0	0	2.00314	3.74001	USP9X;NAV1;ELP3;ASTN1
protein targeting to membrane (GO:0006612)	6/87	0.155191	0.506309	0	0	1.70737	3.181	RABGEF1;ARL6;VPS37C;CHMP4B;VPS37A;GDAP1
activation of protein kinase A activity (GO:0034199)	2/17	0.156593	0.506309	0	0	3.06907	5.69039	ADCY9;ADCY1
amyloid-beta metabolic process (GO:0050435)	2/17	0.156593	0.506309	0	0	3.06907	5.69039	DYRK1A;PSEN1
cell communication by electrical coupling involved in cardiac conduction (GO:0086064)	2/17	0.156593	0.506309	0	0	3.06907	5.69039	GJC3;ATP1A2
diol biosynthetic process (GO:0034312)	2/17	0.156593	0.506309	0	0	3.06907	5.69039	GCH1;SPHK2
embryo development ending in birth or egg hatching (GO:0009792)	2/17	0.156593	0.506309	0	0	3.06907	5.69039	CAMSAP3;CELF4
negative regulation of amyloid-beta formation (GO:1902430)	2/17	0.156593	0.506309	0	0	3.06907	5.69039	RTN2;GGA3
positive regulation of cytokine production involved in inflammatory response (GO:1900017)	2/17	0.156593	0.506309	0	0	3.06907	5.69039	STAT3;APPL1
positive regulation of dendrite extension (GO:1903861)	2/17	0.156593	0.506309	0	0	3.06907	5.69039	CPNE6;SYT17
response to purine-containing compound (GO:0014074)	2/17	0.156593	0.506309	0	0	3.06907	5.69039	STAT1;DGKQ
RNA interference (GO:0016246)	2/17	0.156593	0.506309	0	0	3.06907	5.69039	AGO2;TSN
ruffle organization (GO:0031529)	2/17	0.156593	0.506309	0	0	3.06907	5.69039	CYFIP1;INPP5K
vasculature development (GO:0001944)	2/17	0.156593	0.506309	0	0	3.06907	5.69039	STK11;BMPR2
apoptotic mitochondrial changes (GO:0008637)	3/33	0.157364	0.506309	0	0	2.30277	4.25826	ERBB4;BAD;TIMM50
bile acid metabolic process (GO:0008206)	3/33	0.157364	0.506309	0	0	2.30277	4.25826	OSBPL9;OSBP;OSBPL2
exonucleolytic catabolism of deadenylated mRNA (GO:0043928)	3/33	0.157364	0.506309	0	0	2.30277	4.25826	DDX6;LSM1;LSM3
neuron projection extension (GO:1990138)	3/33	0.157364	0.506309	0	0	2.30277	4.25826	CYFIP1;USP9X;ULK2
regulation of protein localization to cell surface (GO:2000008)	3/33	0.157364	0.506309	0	0	2.30277	4.25826	GOPC;GPD1L;RAB11FIP5
RNA stabilization (GO:0043489)	3/33	0.157364	0.506309	0	0	2.30277	4.25826	LARP1;ELAVL1;PAIP1
signal transduction by p53 class mediator (GO:0072331)	3/33	0.157364	0.506309	0	0	2.30277	4.25826	DDX5;STK11;PPP1R13B
very long-chain fatty acid metabolic process (GO:0000038)	3/33	0.157364	0.506309	0	0	2.30277	4.25826	ACSBG1;HACD3;SLC27A4
cellular response to decreased oxygen levels (GO:0036294)	5/69	0.160327	0.513041	0	0	1.80017	3.29529	NPEPPS;TIGAR;BAD;STUB1;FMN2
synapse assembly (GO:0007416)	5/69	0.160327	0.513041	0	0	1.80017	3.29529	ACHE;GABRB2;NLGN1;DVL1;PTEN
mitotic metaphase plate congression (GO:0007080)	4/51	0.162582	0.513041	0	0	1.96042	3.56125	CHMP1A;CHMP4B;CHMP7;MAD1L1
regulation of epithelial cell migration (GO:0010632)	4/51	0.162582	0.513041	0	0	1.96042	3.56125	BMPR2;GLUL;HDAC6;CLASP1
regulation of protein modification process (GO:0031399)	4/51	0.162582	0.513041	0	0	1.96042	3.56125	SPRED3;PPP2CA;STAT2;WARS1
sensory perception (GO:0007600)	4/51	0.162582	0.513041	0	0	1.96042	3.56125	CHRNB2;ADORA2A;CHRNA4;NIPSNAP1
mitotic cell cycle phase transition (GO:0044772)	12/209	0.164716	0.513041	0	0	1.40568	2.5352	CCNY;PPP2R1A;CETN2;CUL2;FBXL17;CHMP4B;CDK14;TUBB4A;CKAP5;CHMP7;GSPT1;CLASP1
negative regulation of transmembrane receptor protein serine/threonine kinase signaling pathway (GO:0090101)	7/108	0.164733	0.513041	0	0	1.59775	2.88142	SPART;SPRED3;BMPR2;UBB;UBE2D3;STUB1;SNX6
cellular protein-containing complex assembly (GO:0034622)	10/168	0.164838	0.513041	0	0	1.46	2.63207	UVRAG;PSMD4;ARL6;VBP1;HIP1R;CHMP4B;DNAJB14;PFDN6;EIF4B;NCK1
regulation of cysteine-type endopeptidase activity involved in apoptotic process (GO:0043281)	6/89	0.167107	0.513041	0	0	1.66606	2.98077	BCAP31;USP47;DDX3X;BAD;PDCD6;RPS6KA1
organelle disassembly (GO:1903008)	3/34	0.167589	0.513041	0	0	2.22837	3.9804	ULK2;DENR;ATG2B
phosphatidylinositol 3-kinase signaling (GO:0014065)	3/34	0.167589	0.513041	0	0	2.22837	3.9804	NYAP1;PTEN;NYAP2
phosphatidylserine metabolic process (GO:0006658)	3/34	0.167589	0.513041	0	0	2.22837	3.9804	OSBPL8;MBOAT2;OSBPL10
positive regulation of mitochondrial outer membrane permeabilization involved in apoptotic signaling pathway (GO:1901030)	3/34	0.167589	0.513041	0	0	2.22837	3.9804	PPP1R13B;BAD;HIP1R
positive regulation of protein dephosphorylation (GO:0035307)	3/34	0.167589	0.513041	0	0	2.22837	3.9804	PTPA;PPP2R5A;CALM1
regulation of amyloid-beta formation (GO:1902003)	3/34	0.167589	0.513041	0	0	2.22837	3.9804	RTN2;EPHA4;GGA3
regulation of transmembrane transport (GO:0034762)	3/34	0.167589	0.513041	0	0	2.22837	3.9804	KCNJ6;SLC2A1;ACTB
response to steroid hormone (GO:0048545)	3/34	0.167589	0.513041	0	0	2.22837	3.9804	ATP1A2;UBE3A;UBE2L3
negative regulation of protein metabolic process (GO:0051248)	4/52	0.170735	0.513041	0	0	1.91948	3.39295	VBP1;SNX12;FMN2;PFDN6
positive regulation of protein localization to cell periphery (GO:1904377)	4/52	0.170735	0.513041	0	0	1.91948	3.39295	ITGA3;EPB41L2;WNK3;SPTBN1
regulation of intrinsic apoptotic signaling pathway (GO:2001242)	4/52	0.170735	0.513041	0	0	1.91948	3.39295	BCAP31;DDX3X;BAD;GSDME
DNA-dependent DNA replication (GO:0006261)	8/129	0.171053	0.513041	0	0	1.52442	2.6918	PSMD8;SRPK2;PSMD6;PSMD12;PSMD4;UBB;PSMD5;PSMD3
positive regulation of macromolecule biosynthetic process (GO:0010557)	8/129	0.171053	0.513041	0	0	1.52442	2.6918	EPM2AIP1;YTHDF1;DDX3X;SLC6A9;YTHDF3;PYM1;CPEB3;ELAVL1
G protein-coupled acetylcholine receptor signaling pathway (GO:0007213)	2/18	0.171549	0.513041	0	0	2.8771	5.07201	GRK2;CHRM4
glycoprotein catabolic process (GO:0006516)	2/18	0.171549	0.513041	0	0	2.8771	5.07201	FBXO2;OGA
microtubule depolymerization (GO:0007019)	2/18	0.171549	0.513041	0	0	2.8771	5.07201	KATNB1;CKAP5
mitochondrial fusion (GO:0008053)	2/18	0.171549	0.513041	0	0	2.8771	5.07201	CHCHD3;GDAP1
negative regulation of Rho protein signal transduction (GO:0035024)	2/18	0.171549	0.513041	0	0	2.8771	5.07201	ITGA3;ABL2
nucleotide biosynthetic process (GO:0009165)	2/18	0.171549	0.513041	0	0	2.8771	5.07201	ADSL;GART
positive regulation of excitatory postsynaptic potential (GO:2000463)	2/18	0.171549	0.513041	0	0	2.8771	5.07201	NLGN1;PTEN
positive regulation of extracellular matrix organization (GO:1903055)	2/18	0.171549	0.513041	0	0	2.8771	5.07201	CARMIL2;CLASP1
positive regulation of mRNA splicing, via spliceosome (GO:0048026)	2/18	0.171549	0.513041	0	0	2.8771	5.07201	DAZAP1;CELF4
positive regulation of phosphoprotein phosphatase activity (GO:0032516)	2/18	0.171549	0.513041	0	0	2.8771	5.07201	PTPA;CALM1
pulmonary valve development (GO:0003177)	2/18	0.171549	0.513041	0	0	2.8771	5.07201	ROBO2;BMPR2
regulation of cartilage development (GO:0061035)	2/18	0.171549	0.513041	0	0	2.8771	5.07201	BMPR2;MBOAT2
regulation of dendrite extension (GO:1903859)	2/18	0.171549	0.513041	0	0	2.8771	5.07201	CPNE6;SYT17
regulation of establishment or maintenance of cell polarity (GO:0032878)	2/18	0.171549	0.513041	0	0	2.8771	5.07201	BCAS3;CYRIB
regulation of mitochondrial outer membrane permeabilization involved in apoptotic signaling pathway (GO:1901028)	2/18	0.171549	0.513041	0	0	2.8771	5.07201	MPV17L;HIP1R
regulation of presynapse assembly (GO:1905606)	2/18	0.171549	0.513041	0	0	2.8771	5.07201	PTPRD;EIF4G1
regulation of presynapse organization (GO:0099174)	2/18	0.171549	0.513041	0	0	2.8771	5.07201	PTPRD;EIF4G1
regulation of telomerase RNA localization to Cajal body (GO:1904872)	2/18	0.171549	0.513041	0	0	2.8771	5.07201	CCT6A;CCT8
release of cytochrome c from mitochondria (GO:0001836)	2/18	0.171549	0.513041	0	0	2.8771	5.07201	BAD;TIMM50
sodium ion import across plasma membrane (GO:0098719)	2/18	0.171549	0.513041	0	0	2.8771	5.07201	SLC12A2;SLC9A7
T cell migration (GO:0072678)	2/18	0.171549	0.513041	0	0	2.8771	5.07201	SLC12A2;S1PR1
ventricular cardiac muscle cell action potential (GO:0086005)	2/18	0.171549	0.513041	0	0	2.8771	5.07201	ANK2;GPD1L
protein complex oligomerization (GO:0051259)	6/90	0.173206	0.513041	0	0	1.64614	2.88613	MPP2;EHD4;ATL2;G3BP2;NOL3;ELAVL1
phosphatidylinositol-mediated signaling (GO:0048015)	5/71	0.174122	0.513041	0	0	1.74544	3.05102	NYAP1;INPP5F;PITPNM2;PTEN;NYAP2
regulation of G1/S transition of mitotic cell cycle (GO:2000045)	5/71	0.174122	0.513041	0	0	1.74544	3.05102	RPTOR;DDX3X;PTEN;APPL1;EIF4G1
regulation of TOR signaling (GO:0032006)	5/71	0.174122	0.513041	0	0	1.74544	3.05102	RPTOR;RRAGC;PDCD6;DGKQ;AKT1S1
negative regulation of Wnt signaling pathway (GO:0030178)	11/191	0.17533	0.513041	0	0	1.40979	2.45456	PSMD8;PTPRU;AMER2;PSMD6;STK11;PSMD12;PSMD4;PSMD5;PSMD3;DVL1;DVL2
G2/M transition of mitotic cell cycle (GO:0000086)	8/130	0.176115	0.513041	0	0	1.51185	2.6255	CCNY;PPP2R1A;CETN2;FBXL17;CDK14;CKAP5;TUBB4A;CLASP1
cellular response to amyloid-beta (GO:1904646)	3/35	0.178001	0.513041	0	0	2.15862	3.7257	EPHA4;PSEN1;SNX6
nuclear-transcribed mRNA catabolic process, exonucleolytic (GO:0000291)	3/35	0.178001	0.513041	0	0	2.15862	3.7257	DDX6;LSM1;LSM3
oxoacid metabolic process (GO:0043436)	3/35	0.178001	0.513041	0	0	2.15862	3.7257	GRHPR;MTARC2;PPA1
positive regulation of cell cycle G1/S phase transition (GO:1902808)	3/35	0.178001	0.513041	0	0	2.15862	3.7257	RPTOR;DDX3X;EIF4G1
regulation of ion transmembrane transport (GO:0034765)	3/35	0.178001	0.513041	0	0	2.15862	3.7257	KCNJ6;AHCYL1;WNK3
semaphorin-plexin signaling pathway (GO:0071526)	3/35	0.178001	0.513041	0	0	2.15862	3.7257	SEMA4D;SEMA6D;PLXNA4
positive regulation of transport (GO:0051050)	6/91	0.179394	0.513041	0	0	1.62668	2.79492	C2CD5;HIP1R;MLC1;INPP5K;SYNGR3;ACTB
positive regulation of protein secretion (GO:0050714)	5/72	0.181185	0.513041	0	0	1.7193	2.93697	ACHE;BAD;FRMD4A;MYRIP;CD2AP
cell cycle G2/M phase transition (GO:0044839)	8/131	0.181242	0.513041	0	0	1.49948	2.56099	CCNY;PPP2R1A;CETN2;FBXL17;CDK14;CKAP5;TUBB4A;CLASP1
regulation of Wnt signaling pathway (GO:0030111)	7/111	0.181303	0.513041	0	0	1.55141	2.64917	PPP2CA;AMER2;CCNY;PPP2R1A;ITGA3;PSEN1;CDK14
aspartate family amino acid metabolic process (GO:0009066)	2/19	0.186726	0.513041	0	0	2.70772	4.54387	SMS;SLC25A12
carbohydrate derivative catabolic process (GO:1901136)	2/19	0.186726	0.513041	0	0	2.70772	4.54387	FBXO2;OGA
cellular response to glucagon stimulus (GO:0071377)	2/19	0.186726	0.513041	0	0	2.70772	4.54387	ADCY9;ADCY1
cellular response to interleukin-7 (GO:0098761)	2/19	0.186726	0.513041	0	0	2.70772	4.54387	STAT5B;STAT3
interleukin-7-mediated signaling pathway (GO:0038111)	2/19	0.186726	0.513041	0	0	2.70772	4.54387	STAT5B;STAT3
negative regulation of amyloid precursor protein catabolic process (GO:1902992)	2/19	0.186726	0.513041	0	0	2.70772	4.54387	RTN2;GGA3
negative regulation of nervous system development (GO:0051961)	2/19	0.186726	0.513041	0	0	2.70772	4.54387	ROBO2;HOOK3
negative regulation of T cell receptor signaling pathway (GO:0050860)	2/19	0.186726	0.513041	0	0	2.70772	4.54387	DUSP3;PHPT1
neural crest cell differentiation (GO:0014033)	2/19	0.186726	0.513041	0	0	2.70772	4.54387	PDCD6;FBXL17
nuclear membrane organization (GO:0071763)	2/19	0.186726	0.513041	0	0	2.70772	4.54387	CHMP4B;CHMP7
pore complex assembly (GO:0046931)	2/19	0.186726	0.513041	0	0	2.70772	4.54387	AFDN;BAD
positive regulation of cilium assembly (GO:0045724)	2/19	0.186726	0.513041	0	0	2.70772	4.54387	MARK4;SEPTIN7
protein import into mitochondrial matrix (GO:0030150)	2/19	0.186726	0.513041	0	0	2.70772	4.54387	TOMM70;TIMM50
regulation of cell-cell adhesion mediated by cadherin (GO:2000047)	2/19	0.186726	0.513041	0	0	2.70772	4.54387	PTPRU;AFDN
regulation of exosomal secretion (GO:1903541)	2/19	0.186726	0.513041	0	0	2.70772	4.54387	STAM;ATP9A
regulation of mitochondrial membrane permeability (GO:0046902)	2/19	0.186726	0.513041	0	0	2.70772	4.54387	HEBP2;BAD
regulation of cytoskeleton organization (GO:0051493)	7/112	0.186976	0.513041	0	0	1.53656	2.57646	CAMSAP3;DIAPH1;DMTN;HIP1R;TPPP;CORO2B;CLASP1
regulation of proteasomal protein catabolic process (GO:0061136)	4/54	0.18745	0.513041	0	0	1.84251	3.0848	USP14;UBB;GLMN;USP19
endoplasmic reticulum organization (GO:0007029)	5/73	0.188352	0.513041	0	0	1.69393	2.82791	REEP1;ATL2;REEP2;MIA3;GET4
cyclic-nucleotide-mediated signaling (GO:0019935)	3/36	0.188585	0.513041	0	0	2.0931	3.49172	GUCY1B1;DGKQ;ADCY1
mitochondrion disassembly (GO:0061726)	3/36	0.188585	0.513041	0	0	2.0931	3.49172	FUNDC2;ULK2;ATG2B
positive regulation of cytokine-mediated signaling pathway (GO:0001961)	3/36	0.188585	0.513041	0	0	2.0931	3.49172	AGPAT1;UBE2K;HSPA1B
positive regulation of interferon-beta production (GO:0032728)	3/36	0.188585	0.513041	0	0	2.0931	3.49172	TOMM70;DDX3X;IRF3
regulation of androgen receptor signaling pathway (GO:0060765)	3/36	0.188585	0.513041	0	0	2.0931	3.49172	DDX5;RNF14;HDAC6
regulation of cardiac muscle contraction (GO:0055117)	3/36	0.188585	0.513041	0	0	2.0931	3.49172	ANK2;SRI;CALM1
regulation of receptor internalization (GO:0002090)	3/36	0.188585	0.513041	0	0	2.0931	3.49172	ATXN2;TBC1D5;WDR54
RNA metabolic process (GO:0016070)	8/133	0.191688	0.513041	0	0	1.47533	2.43708	HNRNPL;ATXN2;DDX3X;PCBP1;PCBP2;AGO2;LSM1;MPHOSPH10
aggresome assembly (GO:0070842)	1/5	0.191838	0.513041	0	0	5.7509	9.49532	HDAC6
amine transport (GO:0015837)	1/5	0.191838	0.513041	0	0	5.7509	9.49532	SLC18A2
axon choice point recognition (GO:0016198)	1/5	0.191838	0.513041	0	0	5.7509	9.49532	ROBO2
C-terminal protein deglutamylation (GO:0035609)	1/5	0.191838	0.513041	0	0	5.7509	9.49532	AGTPBP1
caveolin-mediated endocytosis (GO:0072584)	1/5	0.191838	0.513041	0	0	5.7509	9.49532	MLC1
cellular response to nicotine (GO:0071316)	1/5	0.191838	0.513041	0	0	5.7509	9.49532	BAD
cellular response to salt stress (GO:0071472)	1/5	0.191838	0.513041	0	0	5.7509	9.49532	SLC12A6
disaccharide biosynthetic process (GO:0046351)	1/5	0.191838	0.513041	0	0	5.7509	9.49532	SLC2A1
dopamine catabolic process (GO:0042420)	1/5	0.191838	0.513041	0	0	5.7509	9.49532	MAOB
enamel mineralization (GO:0070166)	1/5	0.191838	0.513041	0	0	5.7509	9.49532	STIM1
endothelial cell apoptotic process (GO:0072577)	1/5	0.191838	0.513041	0	0	5.7509	9.49532	BMPR2
establishment of protein localization to vacuole (GO:0072666)	1/5	0.191838	0.513041	0	0	5.7509	9.49532	STAM
extracellular exosome biogenesis (GO:0097734)	1/5	0.191838	0.513041	0	0	5.7509	9.49532	COPS5
fructose 2,6-bisphosphate metabolic process (GO:0006003)	1/5	0.191838	0.513041	0	0	5.7509	9.49532	TIGAR
fructose catabolic process (GO:0006001)	1/5	0.191838	0.513041	0	0	5.7509	9.49532	ALDH1A1
fructose catabolic process to hydroxyacetone phosphate and glyceraldehyde-3-phosphate (GO:0061624)	1/5	0.191838	0.513041	0	0	5.7509	9.49532	ALDH1A1
gamma-aminobutyric acid metabolic process (GO:0009448)	1/5	0.191838	0.513041	0	0	5.7509	9.49532	ALDH1A1
glial cell-derived neurotrophic factor receptor signaling pathway (GO:0035860)	1/5	0.191838	0.513041	0	0	5.7509	9.49532	RET
glucose import across plasma membrane (GO:0098708)	1/5	0.191838	0.513041	0	0	5.7509	9.49532	SLC2A1
glucose import in response to insulin stimulus (GO:0044381)	1/5	0.191838	0.513041	0	0	5.7509	9.49532	SLC27A4
glutamate catabolic process (GO:0006538)	1/5	0.191838	0.513041	0	0	5.7509	9.49532	GLUL
histone H4-K20 methylation (GO:0034770)	1/5	0.191838	0.513041	0	0	5.7509	9.49532	SMYD5
histone H4-K20 trimethylation (GO:0034773)	1/5	0.191838	0.513041	0	0	5.7509	9.49532	SMYD5
indolalkylamine biosynthetic process (GO:0046219)	1/5	0.191838	0.513041	0	0	5.7509	9.49532	DDC
indole-containing compound biosynthetic process (GO:0042435)	1/5	0.191838	0.513041	0	0	5.7509	9.49532	DDC
inosine metabolic process (GO:0046102)	1/5	0.191838	0.513041	0	0	5.7509	9.49532	ADAL
intracellular distribution of mitochondria (GO:0048312)	1/5	0.191838	0.513041	0	0	5.7509	9.49532	ARMC1
intracellular sequestering of iron ion (GO:0006880)	1/5	0.191838	0.513041	0	0	5.7509	9.49532	SRI
L-methionine salvage from methylthioadenosine (GO:0019509)	1/5	0.191838	0.513041	0	0	5.7509	9.49532	MTAP
late endosome to Golgi transport (GO:0034499)	1/5	0.191838	0.513041	0	0	5.7509	9.49532	SNX12
late endosome to lysosome transport (GO:1902774)	1/5	0.191838	0.513041	0	0	5.7509	9.49532	VPS41
lipid transport across blood-brain barrier (GO:1990379)	1/5	0.191838	0.513041	0	0	5.7509	9.49532	SLC27A4
maintenance of animal organ identity (GO:0048496)	1/5	0.191838	0.513041	0	0	5.7509	9.49532	IQCB1
mature ribosome assembly (GO:0042256)	1/5	0.191838	0.513041	0	0	5.7509	9.49532	DDX3X
membrane depolarization during AV node cell action potential (GO:0086045)	1/5	0.191838	0.513041	0	0	5.7509	9.49532	CACNB2
membrane depolarization during SA node cell action potential (GO:0086046)	1/5	0.191838	0.513041	0	0	5.7509	9.49532	ANK2
metanephric mesenchymal cell differentiation (GO:0072162)	1/5	0.191838	0.513041	0	0	5.7509	9.49532	STAT1
microtubule nucleation by microtubule organizing center (GO:0051418)	1/5	0.191838	0.513041	0	0	5.7509	9.49532	TPPP
modulation by symbiont of host autophagy (GO:0075071)	1/5	0.191838	0.513041	0	0	5.7509	9.49532	ULK2
mRNA cleavage involved in gene silencing by miRNA (GO:0035279)	1/5	0.191838	0.513041	0	0	5.7509	9.49532	AGO2
negative regulation of calcium ion-dependent exocytosis (GO:0045955)	1/5	0.191838	0.513041	0	0	5.7509	9.49532	CBARP
negative regulation of collateral sprouting (GO:0048671)	1/5	0.191838	0.513041	0	0	5.7509	9.49532	ULK2
negative regulation of gene silencing by RNA (GO:0060967)	1/5	0.191838	0.513041	0	0	5.7509	9.49532	ELAVL1
negative regulation of histone deacetylation (GO:0031064)	1/5	0.191838	0.513041	0	0	5.7509	9.49532	SPHK2
negative regulation of macrophage cytokine production (GO:0010936)	1/5	0.191838	0.513041	0	0	5.7509	9.49532	CUEDC2
negative regulation of organ growth (GO:0046621)	1/5	0.191838	0.513041	0	0	5.7509	9.49532	PTEN
negative regulation of PERK-mediated unfolded protein response (GO:1903898)	1/5	0.191838	0.513041	0	0	5.7509	9.49532	NCK1
negative regulation of posttranscriptional gene silencing (GO:0060149)	1/5	0.191838	0.513041	0	0	5.7509	9.49532	ELAVL1
negative regulation of synapse organization (GO:1905809)	1/5	0.191838	0.513041	0	0	5.7509	9.49532	ROBO2
negative regulation of tubulin deacetylation (GO:1904428)	1/5	0.191838	0.513041	0	0	5.7509	9.49532	TPPP
neuroinflammatory response (GO:0150076)	1/5	0.191838	0.513041	0	0	5.7509	9.49532	ADCY1
plus-end-directed vesicle transport along microtubule (GO:0072383)	1/5	0.191838	0.513041	0	0	5.7509	9.49532	KIFAP3
PML body organization (GO:0030578)	1/5	0.191838	0.513041	0	0	5.7509	9.49532	HABP4
polyphosphate catabolic process (GO:0006798)	1/5	0.191838	0.513041	0	0	5.7509	9.49532	PRUNE1
positive regulation of amine transport (GO:0051954)	1/5	0.191838	0.513041	0	0	5.7509	9.49532	GRK2
positive regulation of amino acid transport (GO:0051957)	1/5	0.191838	0.513041	0	0	5.7509	9.49532	SLC12A2
positive regulation of basement membrane assembly involved in embryonic body morphogenesis (GO:1904261)	1/5	0.191838	0.513041	0	0	5.7509	9.49532	CLASP1
positive regulation of DNA demethylation (GO:1901537)	1/5	0.191838	0.513041	0	0	5.7509	9.49532	USP9X
positive regulation of histone H3-K9 acetylation (GO:2000617)	1/5	0.191838	0.513041	0	0	5.7509	9.49532	SPHK2
positive regulation of intrinsic apoptotic signaling pathway by p53 class mediator (GO:1902255)	1/5	0.191838	0.513041	0	0	5.7509	9.49532	UBB
positive regulation of mast cell activation involved in immune response (GO:0033008)	1/5	0.191838	0.513041	0	0	5.7509	9.49532	SPHK2
positive regulation of membrane permeability (GO:1905710)	1/5	0.191838	0.513041	0	0	5.7509	9.49532	HEBP2
positive regulation of metallopeptidase activity (GO:1905050)	1/5	0.191838	0.513041	0	0	5.7509	9.49532	STAT3
positive regulation of necrotic cell death (GO:0010940)	1/5	0.191838	0.513041	0	0	5.7509	9.49532	HEBP2
positive regulation of non-motile cilium assembly (GO:1902857)	1/5	0.191838	0.513041	0	0	5.7509	9.49532	SEPTIN7
positive regulation of nucleotide-binding oligomerization domain containing signaling pathway (GO:0070426)	1/5	0.191838	0.513041	0	0	5.7509	9.49532	HSPA1B
positive regulation of protein localization to cell cortex (GO:1904778)	1/5	0.191838	0.513041	0	0	5.7509	9.49532	EPB41L2
positive regulation of protein localization to synapse (GO:1902474)	1/5	0.191838	0.513041	0	0	5.7509	9.49532	DVL1
positive regulation of store-operated calcium channel activity (GO:1901341)	1/5	0.191838	0.513041	0	0	5.7509	9.49532	STIM1
postsynaptic density protein 95 clustering (GO:0097119)	1/5	0.191838	0.513041	0	0	5.7509	9.49532	NLGN1
proline biosynthetic process (GO:0006561)	1/5	0.191838	0.513041	0	0	5.7509	9.49532	PYCR3
protein de-ADP-ribosylation (GO:0051725)	1/5	0.191838	0.513041	0	0	5.7509	9.49532	MACROD2
protein retention in Golgi apparatus (GO:0045053)	1/5	0.191838	0.513041	0	0	5.7509	9.49532	VPS13C
protein side chain deglutamylation (GO:0035610)	1/5	0.191838	0.513041	0	0	5.7509	9.49532	AGTPBP1
protein transport to vacuole involved in ubiquitin-dependent protein catabolic process via the multivesicular body sorting pathway (GO:0043328)	1/5	0.191838	0.513041	0	0	5.7509	9.49532	STAM
quinone catabolic process (GO:1901662)	1/5	0.191838	0.513041	0	0	5.7509	9.49532	NQO2
R-loop disassembly (GO:0062176)	1/5	0.191838	0.513041	0	0	5.7509	9.49532	SRPK2
regulation of barbed-end actin filament capping (GO:2000812)	1/5	0.191838	0.513041	0	0	5.7509	9.49532	CARMIL2
regulation of basement membrane assembly involved in embryonic body morphogenesis (GO:1904259)	1/5	0.191838	0.513041	0	0	5.7509	9.49532	CLASP1
regulation of chaperone-mediated protein folding (GO:1903644)	1/5	0.191838	0.513041	0	0	5.7509	9.49532	DNAJB2
regulation of circadian sleep/wake cycle (GO:0042749)	1/5	0.191838	0.513041	0	0	5.7509	9.49532	PTGDS
regulation of core promoter binding (GO:1904796)	1/5	0.191838	0.513041	0	0	5.7509	9.49532	PSEN1
regulation of endothelial tube morphogenesis (GO:1901509)	1/5	0.191838	0.513041	0	0	5.7509	9.49532	FGF1
regulation of Fc-gamma receptor signaling pathway involved in phagocytosis (GO:1905449)	1/5	0.191838	0.513041	0	0	5.7509	9.49532	APPL1
regulation of hormone metabolic process (GO:0032350)	1/5	0.191838	0.513041	0	0	5.7509	9.49532	STUB1
regulation of hydrogen peroxide biosynthetic process (GO:0010728)	1/5	0.191838	0.513041	0	0	5.7509	9.49532	MPV17L
regulation of lyase activity (GO:0051339)	1/5	0.191838	0.513041	0	0	5.7509	9.49532	PHPT1
regulation of metaphase plate congression (GO:0090235)	1/5	0.191838	0.513041	0	0	5.7509	9.49532	MAD1L1
regulation of microvillus assembly (GO:0032534)	1/5	0.191838	0.513041	0	0	5.7509	9.49532	RAP1GAP
regulation of platelet-derived growth factor receptor-beta signaling pathway (GO:2000586)	1/5	0.191838	0.513041	0	0	5.7509	9.49532	HIP1R
regulation of respiratory gaseous exchange by nervous system process (GO:0002087)	1/5	0.191838	0.513041	0	0	5.7509	9.49532	ATP1A2
regulation of sequestering of zinc ion (GO:0061088)	1/5	0.191838	0.513041	0	0	5.7509	9.49532	AP3D1
regulation of skeletal muscle tissue development (GO:0048641)	1/5	0.191838	0.513041	0	0	5.7509	9.49532	USP19
regulation of synapse structural plasticity (GO:0051823)	1/5	0.191838	0.513041	0	0	5.7509	9.49532	CTNNA2
regulation of triglyceride metabolic process (GO:0090207)	1/5	0.191838	0.513041	0	0	5.7509	9.49532	MBOAT7
renal tubule development (GO:0061326)	1/5	0.191838	0.513041	0	0	5.7509	9.49532	STAT1
response to acetylcholine (GO:1905144)	1/5	0.191838	0.513041	0	0	5.7509	9.49532	CHRNB2
response to cocaine (GO:0042220)	1/5	0.191838	0.513041	0	0	5.7509	9.49532	CHRNB2
retina vasculature development in camera-type eye (GO:0061298)	1/5	0.191838	0.513041	0	0	5.7509	9.49532	BMPR2
SA node cell to atrial cardiac muscle cell signaling (GO:0086018)	1/5	0.191838	0.513041	0	0	5.7509	9.49532	ANK2
serotonin metabolic process (GO:0042428)	1/5	0.191838	0.513041	0	0	5.7509	9.49532	DDC
sulfide oxidation (GO:0019418)	1/5	0.191838	0.513041	0	0	5.7509	9.49532	ETHE1
sulfide oxidation, using sulfide:quinone oxidoreductase (GO:0070221)	1/5	0.191838	0.513041	0	0	5.7509	9.49532	ETHE1
tricuspid valve development (GO:0003175)	1/5	0.191838	0.513041	0	0	5.7509	9.49532	BMPR2
tricuspid valve morphogenesis (GO:0003186)	1/5	0.191838	0.513041	0	0	5.7509	9.49532	BMPR2
tRNA thio-modification (GO:0034227)	1/5	0.191838	0.513041	0	0	5.7509	9.49532	CTU2
ubiquitin-dependent SMAD protein catabolic process (GO:0030579)	1/5	0.191838	0.513041	0	0	5.7509	9.49532	STUB1
ubiquitin-independent protein catabolic process via the multivesicular body sorting pathway (GO:0090611)	1/5	0.191838	0.513041	0	0	5.7509	9.49532	CHMP4B
vascular endothelial growth factor receptor-2 signaling pathway (GO:0036324)	1/5	0.191838	0.513041	0	0	5.7509	9.49532	PDCD6
vesicle tethering to Golgi (GO:0099041)	1/5	0.191838	0.513041	0	0	5.7509	9.49532	WDR11
nuclear-transcribed mRNA catabolic process, nonsense-mediated decay (GO:0000184)	7/113	0.192722	0.514965	0	0	1.52198	2.50595	PPP2CA;UPF1;PPP2R1A;PYM1;GSPT2;GSPT1;EIF4G1
regulation of apoptotic process (GO:0042981)	36/742	0.194664	0.519711	0	0	1.17958	1.93036	MTCH1;MTCH2;TRIO;PPP1R13B;DDX3X;RASGRF2;SRA1;FAIM2;FMN2;PSEN1;NOL3;CBL;PTPA;ABR;PIDD1;BAG4;UBB;RPS6KA1;TOMM70;USP47;ARHGEF12;SEMA4D;SPHK2;STAT1;BAD;HIP1R;BRAF;COPS5;IRF3;STK26;WNK3;AKT1S1;TAX1BP1;UBE2O;HSPA1B;SLC27A4
mitotic nuclear division (GO:0140014)	5/74	0.19562	0.521499	0	0	1.66929	2.72358	ZNF207;CHMP4B;ABRAXAS2;CHMP7;CLASP1
ceramide metabolic process (GO:0006672)	4/55	0.195999	0.521499	0	0	1.80628	2.94361	PPP2CA;PPP2R1A;AGK;CERS1
negative regulation of cysteine-type endopeptidase activity involved in apoptotic process (GO:0043154)	4/55	0.195999	0.521499	0	0	1.80628	2.94361	USP47;DDX3X;RPS6KA1;NOL3
regulation of cardiac conduction (GO:1903779)	4/55	0.195999	0.521499	0	0	1.80628	2.94361	AHCYL1;STIM1;ANK2;ATP1A2
negative regulation of cell death (GO:0060548)	6/94	0.198474	0.52384	0	0	1.57098	2.54043	TIGAR;CHMP4B;FERMT2;HSPA1B;NCK1;EIF4G1
cellular response to transforming growth factor beta stimulus (GO:0071560)	7/114	0.198537	0.52384	0	0	1.50768	2.43758	UBB;ITGB5;USP9X;ZYX;CBL;FERMT2;APPL1
lysosome localization (GO:0032418)	3/37	0.199324	0.52384	0	0	2.03143	3.27633	SPAG9;KLC2;HDAC6
neural crest cell migration (GO:0001755)	3/37	0.199324	0.52384	0	0	2.03143	3.27633	SEMA4D;ERBB4;SEMA6D
regulation of actin cytoskeleton reorganization (GO:2000249)	3/37	0.199324	0.52384	0	0	2.03143	3.27633	BCAS3;ABL2;PHPT1
regulation of glucose import (GO:0046324)	3/37	0.199324	0.52384	0	0	2.03143	3.27633	RTN2;OSBPL8;APPL1
regulation of intracellular pH (GO:0051453)	3/37	0.199324	0.52384	0	0	2.03143	3.27633	ATP5F1B;SLC9A7;SLC4A4
regulation of intracellular steroid hormone receptor signaling pathway (GO:0033143)	3/37	0.199324	0.52384	0	0	2.03143	3.27633	DDX5;RNF14;HDAC6
regulation of microtubule cytoskeleton organization (GO:0070507)	3/37	0.199324	0.52384	0	0	2.03143	3.27633	CAMSAP3;TPPP;CLASP1
adrenergic receptor signaling pathway (GO:0071875)	2/20	0.202079	0.52384	0	0	2.55716	4.08915	ADCY9;LMBRD2
cellular monovalent inorganic cation homeostasis (GO:0030004)	2/20	0.202079	0.52384	0	0	2.55716	4.08915	SLC12A2;ATP1A2
cellular response to interferon-beta (GO:0035458)	2/20	0.202079	0.52384	0	0	2.55716	4.08915	STAT1;UBE2K
early endosome to late endosome transport (GO:0045022)	2/20	0.202079	0.52384	0	0	2.55716	4.08915	HOOK3;RAB5A
energy reserve metabolic process (GO:0006112)	2/20	0.202079	0.52384	0	0	2.55716	4.08915	GBE1;PYGM
eye morphogenesis (GO:0048592)	2/20	0.202079	0.52384	0	0	2.55716	4.08915	AGTPBP1;STAT3
growth hormone receptor signaling pathway (GO:0060396)	2/20	0.202079	0.52384	0	0	2.55716	4.08915	STAT5B;STAT3
insulin secretion (GO:0030073)	2/20	0.202079	0.52384	0	0	2.55716	4.08915	RAB11FIP2;RAB11FIP5
mesoderm formation (GO:0001707)	2/20	0.202079	0.52384	0	0	2.55716	4.08915	BMPR2;ITGA3
miRNA metabolic process (GO:0010586)	2/20	0.202079	0.52384	0	0	2.55716	4.08915	AGO2;XPO5
negative regulation of axon extension involved in axon guidance (GO:0048843)	2/20	0.202079	0.52384	0	0	2.55716	4.08915	SEMA4D;SEMA6D
negative regulation of dephosphorylation (GO:0035305)	2/20	0.202079	0.52384	0	0	2.55716	4.08915	PTPA;INPP5K
nucleobase-containing compound biosynthetic process (GO:0034654)	2/20	0.202079	0.52384	0	0	2.55716	4.08915	ADAL;CDA
organic cation transport (GO:0015695)	2/20	0.202079	0.52384	0	0	2.55716	4.08915	SLC5A7;RALBP1
positive regulation of natural killer cell mediated cytotoxicity (GO:0045954)	2/20	0.202079	0.52384	0	0	2.55716	4.08915	CADM1;AP1G1
positive regulation of peptidyl-lysine acetylation (GO:2000758)	2/20	0.202079	0.52384	0	0	2.55716	4.08915	DIP2A;DIP2B
production of small RNA involved in gene silencing by RNA (GO:0070918)	2/20	0.202079	0.52384	0	0	2.55716	4.08915	AGO2;TSN
regulation of programmed necrotic cell death (GO:0062098)	2/20	0.202079	0.52384	0	0	2.55716	4.08915	SPATA2;STUB1
positive regulation of protein metabolic process (GO:0051247)	7/115	0.20442	0.52384	0	0	1.49364	2.37127	SLC6A9;HECW2;RANBP9;WWP1;PSEN1;TRIM32;EIF4G1
peptidyl-serine phosphorylation (GO:0018105)	9/156	0.204482	0.52384	0	0	1.41143	2.24033	SRPK2;GRK2;CAB39;DGKQ;RPS6KA1;DYRK1A;ULK2;STK38L;STK32C
autophagosome organization (GO:1905037)	4/56	0.204664	0.52384	0	0	1.77146	2.81021	PACS2;ULK2;UBQLN2;ATG2B
negative regulation of metabolic process (GO:0009892)	4/56	0.204664	0.52384	0	0	1.77146	2.81021	STK11;DOCK7;ALDH1A1;MAP2K6
protein-containing complex disassembly (GO:0032984)	4/56	0.204664	0.52384	0	0	1.77146	2.81021	UVRAG;DVL1;DVL2;PYM1
mRNA metabolic process (GO:0016071)	6/95	0.204996	0.52384	0	0	1.55325	2.46153	DDX5;RIDA;SRSF1;PCBP2;LSM3;HSPA1B
positive regulation of protein phosphorylation (GO:0001934)	19/371	0.209216	0.52384	0	0	1.24605	1.9493	RALBP1;BMPR2;DDX3X;CAB39;SEMA4D;DOCK7;BRAF;FGF1;HDAC6;RPTOR;RAP2C;RAP2A;ERBB4;DGKQ;WNK3;DVL2;CALM1;UBE2K;EIF4G1
regulation of mitotic cell cycle (GO:0007346)	10/178	0.210145	0.52384	0	0	1.37237	2.14084	PSMD8;PSMD6;PSMD12;DUSP3;PSMD4;PSMD5;CDC26;DYNLT3;PSMD3;SRA1
positive regulation of cell development (GO:0010720)	3/38	0.210205	0.52384	0	0	1.97329	3.07768	BAD;NUMB;TRIM32
positive regulation of insulin secretion (GO:0032024)	3/38	0.210205	0.52384	0	0	1.97329	3.07768	BAD;MYRIP;C2CD2L
positive regulation of potassium ion transport (GO:0043268)	3/38	0.210205	0.52384	0	0	1.97329	3.07768	KCNJ6;ANK2;KCNN3
synaptic vesicle endocytosis (GO:0048488)	3/38	0.210205	0.52384	0	0	1.97329	3.07768	NLGN1;DNAJC6;SNCG
ventricular septum development (GO:0003281)	3/38	0.210205	0.52384	0	0	1.97329	3.07768	ROBO2;BMPR2;HECTD1
sphingolipid metabolic process (GO:0006665)	7/116	0.210369	0.52384	0	0	1.47986	2.30694	PPP2CA;PPP2R1A;SPHK2;AGK;TEX2;HACD3;CERS1
phospholipid metabolic process (GO:0006644)	5/76	0.210436	0.52384	0	0	1.6221	2.52815	PLPPR1;PLPPR3;PLPPR4;AGPAT1;AGPAT3
regulation of BMP signaling pathway (GO:0030510)	5/76	0.210436	0.52384	0	0	1.6221	2.52815	SPART;BMPR2;ITGA3;UBE2D3;UBE2O
regulation of epithelial to mesenchymal transition (GO:0010717)	5/76	0.210436	0.52384	0	0	1.6221	2.52815	SPRED3;PPP2CA;PTEN;CLASP1;FERMT2
carboxylic acid transport (GO:0046942)	4/57	0.213438	0.52384	0	0	1.73794	2.68409	SLC6A9;SLC1A1;SLC1A4;SLC38A3
positive regulation of cell junction assembly (GO:1901890)	4/57	0.213438	0.52384	0	0	1.73794	2.68409	PTPRD;CNTNAP2;NLGN1;FERMT2
cellular response to growth factor stimulus (GO:0071363)	9/158	0.214657	0.52384	0	0	1.39234	2.14241	STAT5B;GAREM1;BMPR2;DUSP3;SYAP1;INPP5K;CPNE3;APPL1;MTSS2
RNA processing (GO:0006396)	10/179	0.214938	0.52384	0	0	1.36418	2.09729	SRPK2;HNRNPL;PPP2CA;RRAGC;PPP2R1A;SRSF1;LSM1;MPHOSPH10;NOL3;LSM3
beta-catenin destruction complex disassembly (GO:1904886)	2/21	0.217567	0.52384	0	0	2.42244	3.69483	DVL1;DVL2
cellular response to inorganic substance (GO:0071241)	2/21	0.217567	0.52384	0	0	2.42244	3.69483	GUCY1B1;DDI2
cellular response to steroid hormone stimulus (GO:0071383)	2/21	0.217567	0.52384	0	0	2.42244	3.69483	ATP1A2;UBE2L3
mitotic spindle assembly checkpoint signaling (GO:0007094)	2/21	0.217567	0.52384	0	0	2.42244	3.69483	ZNF207;MAD1L1
mitotic spindle checkpoint signaling (GO:0071174)	2/21	0.217567	0.52384	0	0	2.42244	3.69483	ZNF207;MAD1L1
negative regulation of protein localization to cell periphery (GO:1904376)	2/21	0.217567	0.52384	0	0	2.42244	3.69483	NUMB;PPP2R5A
negative regulation of protein localization to plasma membrane (GO:1903077)	2/21	0.217567	0.52384	0	0	2.42244	3.69483	NUMB;PPP2R5A
negative regulation of response to wounding (GO:1903035)	2/21	0.217567	0.52384	0	0	2.42244	3.69483	EPHA4;INPP5F
positive regulation of glycolytic process (GO:0045821)	2/21	0.217567	0.52384	0	0	2.42244	3.69483	PSEN1;SLC4A4
positive regulation of purine nucleotide metabolic process (GO:1900544)	2/21	0.217567	0.52384	0	0	2.42244	3.69483	PSEN1;SLC4A4
regulation of fibroblast migration (GO:0010762)	2/21	0.217567	0.52384	0	0	2.42244	3.69483	DMTN;APPL1
response to glucagon (GO:0033762)	2/21	0.217567	0.52384	0	0	2.42244	3.69483	ADCY9;ADCY1
spindle assembly checkpoint signaling (GO:0071173)	2/21	0.217567	0.52384	0	0	2.42244	3.69483	ZNF207;MAD1L1
sterol transport (GO:0015918)	2/21	0.217567	0.52384	0	0	2.42244	3.69483	OSBPL2;OSBP
positive regulation of cellular biosynthetic process (GO:0031328)	10/180	0.219776	0.52384	0	0	1.35608	2.05466	EPM2AIP1;YTHDF1;LPGAT1;DDX3X;SLC6A9;YTHDF3;PYM1;CPEB3;ELAVL1;APPL1
protein autophosphorylation (GO:0046777)	9/159	0.219818	0.52384	0	0	1.38298	2.09515	EPHA4;STK11;ERBB4;STK26;WNK2;WNK3;DYRK1A;ULK2;AATK
cellular response to ketone (GO:1901655)	3/39	0.221212	0.52384	0	0	1.91837	2.89412	LARP1;SPHK2;ADCY1
protein monoubiquitination (GO:0006513)	3/39	0.221212	0.52384	0	0	1.91837	2.89412	RNF126;UBE2D3;UBE2O
regulation of heart rate by cardiac conduction (GO:0086091)	3/39	0.221212	0.52384	0	0	1.91837	2.89412	CACNB2;KCND3;ANK2
regulation of intracellular transport (GO:0032386)	3/39	0.221212	0.52384	0	0	1.91837	2.89412	INPP5F;MLC1;ATP9A
regulation of receptor-mediated endocytosis (GO:0048259)	3/39	0.221212	0.52384	0	0	1.91837	2.89412	HIP1R;CBL;SMAP1
vesicle cytoskeletal trafficking (GO:0099518)	3/39	0.221212	0.52384	0	0	1.91837	2.89412	KIF1A;TANC2;PPFIA2
regulation of protein phosphorylation (GO:0001932)	14/266	0.2222	0.52384	0	0	1.28144	1.92751	RALBP1;SEMA4D;STAT2;PTEN;PPP2R5A;PPP2R5C;FGF1;WARS1;PPP2CA;RAP2A;PPP2R5E;ERBB4;DVL2;INPP5K
autophagosome assembly (GO:0000045)	4/58	0.222315	0.52384	0	0	1.70567	2.56475	PACS2;ULK2;UBQLN2;ATG2B
cellular iron ion homeostasis (GO:0006879)	4/58	0.222315	0.52384	0	0	1.70567	2.56475	ATP6V1A;BOLA2;ATP6V0D1;ABCG2
regulation of tumor necrosis factor-mediated signaling pathway (GO:0010803)	4/58	0.222315	0.52384	0	0	1.70567	2.56475	TAX1BP1;SPATA2;UBE2K;HSPA1B
regulation of cellular response to stress (GO:0080135)	7/118	0.222455	0.52384	0	0	1.45304	2.18397	RPTOR;BAG4;AKT1S1;CORO2B;USP19;HSPA1B;EIF4G1
positive regulation of apoptotic process (GO:0043065)	16/310	0.224597	0.52384	0	0	1.25556	1.87511	SRPK2;MTCH1;MTCH2;TRIO;DDX3X;ARHGEF12;SPHK2;BAD;RASGRF2;HIP1R;PSEN1;PTPA;ABR;PIDD1;UBB;SLC27A4
adiponectin-activated signaling pathway (GO:0033211)	1/6	0.225547	0.52384	0	0	4.60048	6.85116	APPL1
aminophospholipid transport (GO:0015917)	1/6	0.225547	0.52384	0	0	4.60048	6.85116	ATP8A2
cell junction disassembly (GO:0150146)	1/6	0.225547	0.52384	0	0	4.60048	6.85116	C1QA
cellular carbohydrate catabolic process (GO:0044275)	1/6	0.225547	0.52384	0	0	4.60048	6.85116	ABHD10
cellular heat acclimation (GO:0070370)	1/6	0.225547	0.52384	0	0	4.60048	6.85116	HSPA1B
cellular response to magnesium ion (GO:0071286)	1/6	0.225547	0.52384	0	0	4.60048	6.85116	ANK3
choline transport (GO:0015871)	1/6	0.225547	0.52384	0	0	4.60048	6.85116	SLC5A7
chondrocyte development (GO:0002063)	1/6	0.225547	0.52384	0	0	4.60048	6.85116	BMPR2
double-strand break repair via classical nonhomologous end joining (GO:0097680)	1/6	0.225547	0.52384	0	0	4.60048	6.85116	UVRAG
embryonic camera-type eye development (GO:0031076)	1/6	0.225547	0.52384	0	0	4.60048	6.85116	TH
embryonic camera-type eye morphogenesis (GO:0048596)	1/6	0.225547	0.52384	0	0	4.60048	6.85116	TH
foam cell differentiation (GO:0090077)	1/6	0.225547	0.52384	0	0	4.60048	6.85116	STAT1
free ubiquitin chain polymerization (GO:0010994)	1/6	0.225547	0.52384	0	0	4.60048	6.85116	UBE2K
galactose catabolic process (GO:0019388)	1/6	0.225547	0.52384	0	0	4.60048	6.85116	PGM2L1
heat acclimation (GO:0010286)	1/6	0.225547	0.52384	0	0	4.60048	6.85116	HSPA1B
hexose import across plasma membrane (GO:0140271)	1/6	0.225547	0.52384	0	0	4.60048	6.85116	SLC2A1
hydrogen peroxide biosynthetic process (GO:0050665)	1/6	0.225547	0.52384	0	0	4.60048	6.85116	MAOB
hydrogen sulfide metabolic process (GO:0070813)	1/6	0.225547	0.52384	0	0	4.60048	6.85116	ETHE1
imitative learning (GO:0098596)	1/6	0.225547	0.52384	0	0	4.60048	6.85116	CNTNAP2
inclusion body assembly (GO:0070841)	1/6	0.225547	0.52384	0	0	4.60048	6.85116	HDAC6
indolalkylamine metabolic process (GO:0006586)	1/6	0.225547	0.52384	0	0	4.60048	6.85116	DDC
macromolecule biosynthetic process (GO:0009059)	1/6	0.225547	0.52384	0	0	4.60048	6.85116	EIF4G1
macrophage derived foam cell differentiation (GO:0010742)	1/6	0.225547	0.52384	0	0	4.60048	6.85116	STAT1
magnesium ion homeostasis (GO:0010960)	1/6	0.225547	0.52384	0	0	4.60048	6.85116	ANK3
mesenchymal cell differentiation involved in kidney development (GO:0072161)	1/6	0.225547	0.52384	0	0	4.60048	6.85116	STAT1
mitochondrial proton-transporting ATP synthase complex assembly (GO:0033615)	1/6	0.225547	0.52384	0	0	4.60048	6.85116	ATPAF1
monoubiquitinated protein deubiquitination (GO:0035520)	1/6	0.225547	0.52384	0	0	4.60048	6.85116	USP47
mRNA 5'-splice site recognition (GO:0000395)	1/6	0.225547	0.52384	0	0	4.60048	6.85116	SRSF1
N-terminal peptidyl-methionine acetylation (GO:0017196)	1/6	0.225547	0.52384	0	0	4.60048	6.85116	NAA30
negative regulation of amino acid transport (GO:0051956)	1/6	0.225547	0.52384	0	0	4.60048	6.85116	SLC43A2
negative regulation of amyloid precursor protein biosynthetic process (GO:0042985)	1/6	0.225547	0.52384	0	0	4.60048	6.85116	AGO2
negative regulation of Arp2/3 complex-mediated actin nucleation (GO:0034316)	1/6	0.225547	0.52384	0	0	4.60048	6.85116	CTNNA2
negative regulation of cellular response to hypoxia (GO:1900038)	1/6	0.225547	0.52384	0	0	4.60048	6.85116	NOL3
negative regulation of cytosolic calcium ion concentration (GO:0051481)	1/6	0.225547	0.52384	0	0	4.60048	6.85116	ATP1A2
negative regulation of endoplasmic reticulum calcium ion concentration (GO:0032471)	1/6	0.225547	0.52384	0	0	4.60048	6.85116	BCAP31
negative regulation of ERAD pathway (GO:1904293)	1/6	0.225547	0.52384	0	0	4.60048	6.85116	USP14
negative regulation of establishment of protein localization to mitochondrion (GO:1903748)	1/6	0.225547	0.52384	0	0	4.60048	6.85116	BAG4
negative regulation of excitatory postsynaptic potential (GO:0090394)	1/6	0.225547	0.52384	0	0	4.60048	6.85116	PTEN
negative regulation of glycogen biosynthetic process (GO:0045719)	1/6	0.225547	0.52384	0	0	4.60048	6.85116	INPP5K
negative regulation of lamellipodium organization (GO:1902744)	1/6	0.225547	0.52384	0	0	4.60048	6.85116	ARPIN
negative regulation of lens fiber cell differentiation (GO:1902747)	1/6	0.225547	0.52384	0	0	4.60048	6.85116	SPRED3
negative regulation of relaxation of muscle (GO:1901078)	1/6	0.225547	0.52384	0	0	4.60048	6.85116	GRK2
negative regulation of sequestering of triglyceride (GO:0010891)	1/6	0.225547	0.52384	0	0	4.60048	6.85116	OSBPL8
neurotransmitter loading into synaptic vesicle (GO:0098700)	1/6	0.225547	0.52384	0	0	4.60048	6.85116	SLC18A2
neurotransmitter-gated ion channel clustering (GO:0072578)	1/6	0.225547	0.52384	0	0	4.60048	6.85116	NLGN1
norepinephrine biosynthetic process (GO:0042421)	1/6	0.225547	0.52384	0	0	4.60048	6.85116	TH
norepinephrine transport (GO:0015874)	1/6	0.225547	0.52384	0	0	4.60048	6.85116	SLC6A3
plus-end-directed organelle transport along microtubule (GO:0072386)	1/6	0.225547	0.52384	0	0	4.60048	6.85116	KIFAP3
polyphosphate metabolic process (GO:0006797)	1/6	0.225547	0.52384	0	0	4.60048	6.85116	PRUNE1
positive regulation of anion transport (GO:1903793)	1/6	0.225547	0.52384	0	0	4.60048	6.85116	SLC12A2
positive regulation of autophagosome maturation (GO:1901098)	1/6	0.225547	0.52384	0	0	4.60048	6.85116	UVRAG
positive regulation of cholesterol metabolic process (GO:0090205)	1/6	0.225547	0.52384	0	0	4.60048	6.85116	FGF1
positive regulation of endoplasmic reticulum stress-induced intrinsic apoptotic signaling pathway (GO:1902237)	1/6	0.225547	0.52384	0	0	4.60048	6.85116	NCK1
positive regulation of extrinsic apoptotic signaling pathway via death domain receptors (GO:1902043)	1/6	0.225547	0.52384	0	0	4.60048	6.85116	PTEN
positive regulation of gap junction assembly (GO:1903598)	1/6	0.225547	0.52384	0	0	4.60048	6.85116	CNTNAP2
positive regulation of hemoglobin biosynthetic process (GO:0046985)	1/6	0.225547	0.52384	0	0	4.60048	6.85116	SLC6A9
positive regulation of neurotransmitter secretion (GO:0001956)	1/6	0.225547	0.52384	0	0	4.60048	6.85116	NLGN1
positive regulation of non-membrane spanning protein tyrosine kinase activity (GO:1903997)	1/6	0.225547	0.52384	0	0	4.60048	6.85116	DOCK3
positive regulation of toll-like receptor 7 signaling pathway (GO:0034157)	1/6	0.225547	0.52384	0	0	4.60048	6.85116	DDX3X
postsynaptic density assembly (GO:0097107)	1/6	0.225547	0.52384	0	0	4.60048	6.85116	PTEN
proline transport (GO:0015824)	1/6	0.225547	0.52384	0	0	4.60048	6.85116	SLC1A4
protein deubiquitination involved in ubiquitin-dependent protein catabolic process (GO:0071947)	1/6	0.225547	0.52384	0	0	4.60048	6.85116	USP9X
protein insertion into mitochondrial membrane involved in apoptotic signaling pathway (GO:0001844)	1/6	0.225547	0.52384	0	0	4.60048	6.85116	BAD
protein localization to perinuclear region of cytoplasm (GO:1905719)	1/6	0.225547	0.52384	0	0	4.60048	6.85116	HOOK3
protein repair (GO:0030091)	1/6	0.225547	0.52384	0	0	4.60048	6.85116	FN3K
pteridine-containing compound biosynthetic process (GO:0042559)	1/6	0.225547	0.52384	0	0	4.60048	6.85116	GCH1
purine nucleobase biosynthetic process (GO:0009113)	1/6	0.225547	0.52384	0	0	4.60048	6.85116	GART
purine ribonucleoside catabolic process (GO:0046130)	1/6	0.225547	0.52384	0	0	4.60048	6.85116	ADAL
radial glial cell differentiation (GO:0060019)	1/6	0.225547	0.52384	0	0	4.60048	6.85116	STAT3
regulation of adiponectin secretion (GO:0070163)	1/6	0.225547	0.52384	0	0	4.60048	6.85116	RAB11FIP5
regulation of anion channel activity (GO:0010359)	1/6	0.225547	0.52384	0	0	4.60048	6.85116	GOPC
regulation of cellular response to hypoxia (GO:1900037)	1/6	0.225547	0.52384	0	0	4.60048	6.85116	USP19
regulation of DNA demethylation (GO:1901535)	1/6	0.225547	0.52384	0	0	4.60048	6.85116	USP9X
regulation of extracellular exosome assembly (GO:1903551)	1/6	0.225547	0.52384	0	0	4.60048	6.85116	STAM
regulation of glucagon secretion (GO:0070092)	1/6	0.225547	0.52384	0	0	4.60048	6.85116	SYT7
regulation of glucokinase activity (GO:0033131)	1/6	0.225547	0.52384	0	0	4.60048	6.85116	BAD
regulation of hormone biosynthetic process (GO:0046885)	1/6	0.225547	0.52384	0	0	4.60048	6.85116	DGKQ
regulation of hyaluronan biosynthetic process (GO:1900125)	1/6	0.225547	0.52384	0	0	4.60048	6.85116	AP2A1
regulation of hydrogen peroxide metabolic process (GO:0010310)	1/6	0.225547	0.52384	0	0	4.60048	6.85116	HDAC6
regulation of non-motile cilium assembly (GO:1902855)	1/6	0.225547	0.52384	0	0	4.60048	6.85116	SEPTIN7
regulation of nucleotide-binding oligomerization domain containing 2 signaling pathway (GO:0070432)	1/6	0.225547	0.52384	0	0	4.60048	6.85116	HSPA1B
regulation of SNARE complex assembly (GO:0035542)	1/6	0.225547	0.52384	0	0	4.60048	6.85116	SEPTIN8
regulation of superoxide metabolic process (GO:0090322)	1/6	0.225547	0.52384	0	0	4.60048	6.85116	GCH1
regulation of ventricular cardiac muscle cell membrane depolarization (GO:0060373)	1/6	0.225547	0.52384	0	0	4.60048	6.85116	GPD1L
release of sequestered calcium ion into cytosol by sarcoplasmic reticulum (GO:0014808)	1/6	0.225547	0.52384	0	0	4.60048	6.85116	NOL3
retinal ganglion cell axon guidance (GO:0031290)	1/6	0.225547	0.52384	0	0	4.60048	6.85116	ROBO2
ruffle assembly (GO:0097178)	1/6	0.225547	0.52384	0	0	4.60048	6.85116	INPP5K
signal complex assembly (GO:0007172)	1/6	0.225547	0.52384	0	0	4.60048	6.85116	NCK1
T-helper 17 cell lineage commitment (GO:0072540)	1/6	0.225547	0.52384	0	0	4.60048	6.85116	STAT3
T-tubule organization (GO:0033292)	1/6	0.225547	0.52384	0	0	4.60048	6.85116	ANK2
taurine metabolic process (GO:0019530)	1/6	0.225547	0.52384	0	0	4.60048	6.85116	STAT5B
TORC2 signaling (GO:0038203)	1/6	0.225547	0.52384	0	0	4.60048	6.85116	SYAP1
type B pancreatic cell proliferation (GO:0044342)	1/6	0.225547	0.52384	0	0	4.60048	6.85116	BAD
vocal learning (GO:0042297)	1/6	0.225547	0.52384	0	0	4.60048	6.85116	CNTNAP2
xenobiotic transport across blood-brain barrier (GO:1990962)	1/6	0.225547	0.52384	0	0	4.60048	6.85116	ABCG2
protein modification process (GO:0036211)	5/78	0.2256	0.52384	0	0	1.57749	2.34887	FBXO2;UBE2D3;ABL2;UBE2L3;UBE2M
enzyme linked receptor protein signaling pathway (GO:0007167)	8/140	0.230098	0.533866	0	0	1.39658	2.05193	PTPRD;RET;GUCY2C;EPHA4;PTPRU;TRIO;BMPR2;ERBB4
phospholipid transport (GO:0015914)	4/59	0.231286	0.533866	0	0	1.67457	2.45174	OSBPL8;ATP8A2;OSBPL2;ATP9A
autophagy of mitochondrion (GO:0000422)	3/40	0.232331	0.533866	0	0	1.86643	2.72422	FUNDC2;ULK2;ATG2B
organic hydroxy compound transport (GO:0015850)	3/40	0.232331	0.533866	0	0	1.86643	2.72422	SLC10A4;RALBP1;OSBP
positive regulation of catalytic activity (GO:0043085)	3/40	0.232331	0.533866	0	0	1.86643	2.72422	BCAS3;ABL2;PSEN1
positive regulation of cation channel activity (GO:2001259)	3/40	0.232331	0.533866	0	0	1.86643	2.72422	ANK2;ANK3;CALM1
glutathione derivative biosynthetic process (GO:1901687)	2/22	0.233152	0.533866	0	0	2.3012	3.3507	GSTA4;MGST3
glutathione derivative metabolic process (GO:1901685)	2/22	0.233152	0.533866	0	0	2.3012	3.3507	GSTA4;MGST3
mitochondrial calcium ion homeostasis (GO:0051560)	2/22	0.233152	0.533866	0	0	2.3012	3.3507	BCAP31;PDZD8
negative regulation of lymphocyte activation (GO:0051250)	2/22	0.233152	0.533866	0	0	2.3012	3.3507	DUSP3;PAG1
negative regulation of mitotic metaphase/anaphase transition (GO:0045841)	2/22	0.233152	0.533866	0	0	2.3012	3.3507	ZNF207;MAD1L1
negative regulation of phosphate metabolic process (GO:0045936)	2/22	0.233152	0.533866	0	0	2.3012	3.3507	CDA;INPP5K
negative regulation of protein dephosphorylation (GO:0035308)	2/22	0.233152	0.533866	0	0	2.3012	3.3507	PTPA;PPP4R4
neuronal action potential (GO:0019228)	2/22	0.233152	0.533866	0	0	2.3012	3.3507	SCN8A;ANK3
nucleotide-excision repair, DNA duplex unwinding (GO:0000717)	2/22	0.233152	0.533866	0	0	2.3012	3.3507	UBB;CETN2
organelle fusion (GO:0048284)	2/22	0.233152	0.533866	0	0	2.3012	3.3507	CHCHD3;GDAP1
positive regulation of amyloid precursor protein catabolic process (GO:1902993)	2/22	0.233152	0.533866	0	0	2.3012	3.3507	EPHA4;RANBP9
positive regulation of calcium ion transmembrane transporter activity (GO:1901021)	2/22	0.233152	0.533866	0	0	2.3012	3.3507	ANK2;CALM1
regulation of vacuole organization (GO:0044088)	2/22	0.233152	0.533866	0	0	2.3012	3.3507	RAB5A;UBQLN2
peptide biosynthetic process (GO:0043043)	9/162	0.235582	0.539037	0	0	1.35565	1.95986	SARS1;COPS5;AGO2;IGHMBP2;EIF4EBP2;GSPT2;GSPT1;WARS1;EIF4G1
regulation of transforming growth factor beta receptor signaling pathway (GO:0017015)	6/100	0.238683	0.539613	0	0	1.47024	2.1063	SPRED3;STK11;UBB;ITGA3;STUB1;SNX6
adenylate cyclase-inhibiting G protein-coupled receptor signaling pathway (GO:0007193)	4/60	0.240344	0.539613	0	0	1.64458	2.34465	GPR37;ADCY9;CHRM4;ADCY1
homophilic cell adhesion via plasma membrane adhesion molecules (GO:0007156)	4/60	0.240344	0.539613	0	0	1.64458	2.34465	ROBO2;CADM1;NECTIN3;NECTIN1
Notch signaling pathway (GO:0007219)	4/60	0.240344	0.539613	0	0	1.64458	2.34465	GMDS;STAT1;DTX3;PSEN1
response to organic cyclic compound (GO:0014070)	4/60	0.240344	0.539613	0	0	1.64458	2.34465	CHRNB2;STAT5B;SLC1A1;STAT3
regulation of organelle organization (GO:0033043)	5/80	0.241075	0.539613	0	0	1.53526	2.18414	CAMSAP3;DIAPH1;RHOT1;RAB33B;CAMSAP2
negative regulation of programmed cell death (GO:0043069)	19/381	0.242946	0.539613	0	0	1.21098	1.71344	USP47;TIGAR;DDX3X;SEMA4D;BRAF;FAIM2;FMN2;PSEN1;NOL3;CBL;PIDD1;BAG4;COPS5;UBB;RPS6KA1;WNK3;TAX1BP1;UBE2O;HSPA1B
cortical cytoskeleton organization (GO:0030865)	3/41	0.243548	0.539613	0	0	1.81721	2.56671	STRIP1;NLGN1;EPB41L3
potassium ion transport (GO:0006813)	7/122	0.247319	0.539613	0	0	1.40221	1.95899	KCNJ6;SLC24A3;SLC9A7;KCND3;KCNQ2;ATP1A2;KCNN3
protein-DNA complex assembly (GO:0065004)	8/143	0.247343	0.539613	0	0	1.36533	1.90734	PSMD8;PSMD6;PSMD12;PSMD4;UBB;PSMD5;CETN2;PSMD3
receptor-mediated endocytosis (GO:0006898)	8/143	0.247343	0.539613	0	0	1.36533	1.90734	SNX1;GRK2;INPP5F;CTTN;AP1G1;DNAJC6;HIP1R;AP2A1
cytoskeleton-dependent intracellular transport (GO:0030705)	2/23	0.248799	0.539613	0	0	2.19151	3.04863	HOOK3;KIF1A
diacylglycerol metabolic process (GO:0046339)	2/23	0.248799	0.539613	0	0	2.19151	3.04863	DGKE;DGKQ
negative regulation of phosphoprotein phosphatase activity (GO:0032515)	2/23	0.248799	0.539613	0	0	2.19151	3.04863	PTPA;PPP4R4
negative regulation of reactive oxygen species metabolic process (GO:2000378)	2/23	0.248799	0.539613	0	0	2.19151	3.04863	HDAC6;SLC18A2
positive regulation of mRNA processing (GO:0050685)	2/23	0.248799	0.539613	0	0	2.19151	3.04863	DAZAP1;CELF4
positive regulation of natural killer cell mediated immunity (GO:0002717)	2/23	0.248799	0.539613	0	0	2.19151	3.04863	CADM1;AP1G1
protein deacylation (GO:0035601)	2/23	0.248799	0.539613	0	0	2.19151	3.04863	ABHD10;HDAC6
regulation of necroptotic process (GO:0060544)	2/23	0.248799	0.539613	0	0	2.19151	3.04863	SPATA2;STUB1
regulation of steroid metabolic process (GO:0019218)	2/23	0.248799	0.539613	0	0	2.19151	3.04863	DGKQ;STUB1
response to nutrient levels (GO:0031667)	2/23	0.248799	0.539613	0	0	2.19151	3.04863	RPTOR;EIF4G1
vesicle transport along microtubule (GO:0047496)	2/23	0.248799	0.539613	0	0	2.19151	3.04863	KIF1A;KIFAP3
activation of cysteine-type endopeptidase activity involved in apoptotic process (GO:0006919)	5/81	0.248917	0.539613	0	0	1.51498	2.10679	MTCH1;PIDD1;BCL2L13;BAD;HIP1R
negative regulation of protein modification process (GO:0031400)	5/81	0.248917	0.539613	0	0	1.51498	2.10679	PTPA;PTEN;INPP5K;TPPP;WARS1
iron ion homeostasis (GO:0055072)	4/61	0.249482	0.539613	0	0	1.61564	2.24311	ATP6V1A;BOLA2;ATP6V0D1;ABCG2
pattern recognition receptor signaling pathway (GO:0002221)	4/61	0.249482	0.539613	0	0	1.61564	2.24311	UBB;TRAF3;TAB3;TAB1
cell junction assembly (GO:0034329)	6/102	0.252605	0.539613	0	0	1.43946	1.9806	ACHE;NLGN1;CDH11;PTEN;ACTB;FERMT2
intrinsic apoptotic signaling pathway (GO:0097193)	6/102	0.252605	0.539613	0	0	1.43946	1.9806	STK11;DDX5;DDX3X;PPP1R13B;BAD;CUL2
cellular respiration (GO:0045333)	3/42	0.254849	0.539613	0	0	1.77053	2.42046	NDUFS8;ME3;UQCR10
regulation of ubiquitin-dependent protein catabolic process (GO:2000058)	3/42	0.254849	0.539613	0	0	1.77053	2.42046	GLMN;PTEN;UBE3A
cell-cell junction organization (GO:0045216)	5/82	0.256824	0.539613	0	0	1.49523	2.03256	AFDN;CADM1;CDH11;NECTIN3;NECTIN1
positive regulation of cytoskeleton organization (GO:0051495)	5/82	0.256824	0.539613	0	0	1.49523	2.03256	FCHSD1;BCAS3;CTTN;CDC42EP4;NCK1
regulation of cyclin-dependent protein serine/threonine kinase activity (GO:0000079)	5/82	0.256824	0.539613	0	0	1.49523	2.03256	CCNY;PTEN;IPO7;ACTB;IPO5
regulation of gene expression, epigenetic (GO:0040029)	5/82	0.256824	0.539613	0	0	1.49523	2.03256	SPHK2;SMYD5;GLMN;ACTB;HDAC6
ammonium transport (GO:0015696)	1/7	0.257851	0.539613	0	0	3.83353	5.19586	SLC12A2
angiotensin-activated signaling pathway (GO:0038166)	1/7	0.257851	0.539613	0	0	3.83353	5.19586	AHCYL1
astrocyte differentiation (GO:0048708)	1/7	0.257851	0.539613	0	0	3.83353	5.19586	STAT3
autophagosome membrane docking (GO:0016240)	1/7	0.257851	0.539613	0	0	3.83353	5.19586	CALM1
AV node cell action potential (GO:0086016)	1/7	0.257851	0.539613	0	0	3.83353	5.19586	CACNB2
AV node cell to bundle of His cell communication (GO:0086067)	1/7	0.257851	0.539613	0	0	3.83353	5.19586	GJC3
cardiolipin acyl-chain remodeling (GO:0035965)	1/7	0.257851	0.539613	0	0	3.83353	5.19586	LCLAT1
catecholamine catabolic process (GO:0042424)	1/7	0.257851	0.539613	0	0	3.83353	5.19586	MAOB
catecholamine uptake (GO:0090493)	1/7	0.257851	0.539613	0	0	3.83353	5.19586	SLC6A3
cellular amino acid biosynthetic process (GO:0008652)	1/7	0.257851	0.539613	0	0	3.83353	5.19586	ALDH1A1
cleavage furrow formation (GO:0036089)	1/7	0.257851	0.539613	0	0	3.83353	5.19586	SPIRE1
deadenylation-dependent decapping of nuclear-transcribed mRNA (GO:0000290)	1/7	0.257851	0.539613	0	0	3.83353	5.19586	LSM1
dendrite arborization (GO:0140059)	1/7	0.257851	0.539613	0	0	3.83353	5.19586	PHACTR1
flavin-containing compound metabolic process (GO:0042726)	1/7	0.257851	0.539613	0	0	3.83353	5.19586	FLAD1
gap junction assembly (GO:0016264)	1/7	0.257851	0.539613	0	0	3.83353	5.19586	GJB6
glyceraldehyde-3-phosphate metabolic process (GO:0019682)	1/7	0.257851	0.539613	0	0	3.83353	5.19586	ALDH1A1
hexose catabolic process (GO:0019320)	1/7	0.257851	0.539613	0	0	3.83353	5.19586	PGM2L1
hypotonic response (GO:0006971)	1/7	0.257851	0.539613	0	0	3.83353	5.19586	CAB39
inhibition of cysteine-type endopeptidase activity (GO:0097340)	1/7	0.257851	0.539613	0	0	3.83353	5.19586	NOL3
inhibitory postsynaptic potential (GO:0060080)	1/7	0.257851	0.539613	0	0	3.83353	5.19586	CHRNA4
L-methionine salvage (GO:0071267)	1/7	0.257851	0.539613	0	0	3.83353	5.19586	MTAP
malate metabolic process (GO:0006108)	1/7	0.257851	0.539613	0	0	3.83353	5.19586	ME3
membrane fission (GO:0090148)	1/7	0.257851	0.539613	0	0	3.83353	5.19586	CHMP4B
miRNA loading onto RISC involved in gene silencing by miRNA (GO:0035280)	1/7	0.257851	0.539613	0	0	3.83353	5.19586	AGO2
mitral valve development (GO:0003174)	1/7	0.257851	0.539613	0	0	3.83353	5.19586	BMPR2
modulation by symbiont of host defense response (GO:0052031)	1/7	0.257851	0.539613	0	0	3.83353	5.19586	UBB
negative regulation of cell cycle phase transition (GO:1901988)	1/7	0.257851	0.539613	0	0	3.83353	5.19586	PTEN
negative regulation of cytoplasmic translation (GO:2000766)	1/7	0.257851	0.539613	0	0	3.83353	5.19586	CPEB3
negative regulation of glycogen metabolic process (GO:0070874)	1/7	0.257851	0.539613	0	0	3.83353	5.19586	INPP5K
negative regulation of heart rate (GO:0010459)	1/7	0.257851	0.539613	0	0	3.83353	5.19586	SRI
negative regulation of low-density lipoprotein receptor activity (GO:1905598)	1/7	0.257851	0.539613	0	0	3.83353	5.19586	PSEN1
negative regulation of mitochondrial outer membrane permeabilization involved in apoptotic signaling pathway (GO:1901029)	1/7	0.257851	0.539613	0	0	3.83353	5.19586	MPV17L
negative regulation of striated muscle tissue development (GO:0045843)	1/7	0.257851	0.539613	0	0	3.83353	5.19586	USP19
norepinephrine metabolic process (GO:0042415)	1/7	0.257851	0.539613	0	0	3.83353	5.19586	TH
Notch receptor processing, ligand-dependent (GO:0035333)	1/7	0.257851	0.539613	0	0	3.83353	5.19586	PSEN1
pharyngeal arch artery morphogenesis (GO:0061626)	1/7	0.257851	0.539613	0	0	3.83353	5.19586	BMPR2
positive regulation by symbiont of host autophagy (GO:0075044)	1/7	0.257851	0.539613	0	0	3.83353	5.19586	ULK2
positive regulation of adenylate cyclase activity (GO:0045762)	1/7	0.257851	0.539613	0	0	3.83353	5.19586	STIM1
positive regulation of aspartic-type endopeptidase activity involved in amyloid precursor protein catabolic process (GO:1902961)	1/7	0.257851	0.539613	0	0	3.83353	5.19586	EPHA4
positive regulation of B cell receptor signaling pathway (GO:0050861)	1/7	0.257851	0.539613	0	0	3.83353	5.19586	SLC39A10
positive regulation of blood circulation (GO:1903524)	1/7	0.257851	0.539613	0	0	3.83353	5.19586	ATP1A2
positive regulation of cilium movement (GO:0003353)	1/7	0.257851	0.539613	0	0	3.83353	5.19586	TACR1
positive regulation of cilium-dependent cell motility (GO:2000155)	1/7	0.257851	0.539613	0	0	3.83353	5.19586	TACR1
positive regulation of flagellated sperm motility (GO:1902093)	1/7	0.257851	0.539613	0	0	3.83353	5.19586	TACR1
positive regulation of integrin-mediated signaling pathway (GO:2001046)	1/7	0.257851	0.539613	0	0	3.83353	5.19586	DMTN
positive regulation of mast cell activation (GO:0033005)	1/7	0.257851	0.539613	0	0	3.83353	5.19586	SPHK2
positive regulation of membrane depolarization (GO:1904181)	1/7	0.257851	0.539613	0	0	3.83353	5.19586	ANK3
positive regulation of mitochondrial membrane potential (GO:0010918)	1/7	0.257851	0.539613	0	0	3.83353	5.19586	BAD
positive regulation of mitophagy in response to mitochondrial depolarization (GO:0098779)	1/7	0.257851	0.539613	0	0	3.83353	5.19586	HDAC6
positive regulation of mRNA binding (GO:1902416)	1/7	0.257851	0.539613	0	0	3.83353	5.19586	EIF4G1
positive regulation of pinocytosis (GO:0048549)	1/7	0.257851	0.539613	0	0	3.83353	5.19586	APPL1
positive regulation of protein deubiquitination (GO:1903003)	1/7	0.257851	0.539613	0	0	3.83353	5.19586	WDR48
positive regulation of protein localization to centrosome (GO:1904781)	1/7	0.257851	0.539613	0	0	3.83353	5.19586	MARK4
positive regulation of synaptic transmission, GABAergic (GO:0032230)	1/7	0.257851	0.539613	0	0	3.83353	5.19586	NLGN1
positive regulation of trophoblast cell migration (GO:1901165)	1/7	0.257851	0.539613	0	0	3.83353	5.19586	AGO2
positive regulation of type I interferon-mediated signaling pathway (GO:0060340)	1/7	0.257851	0.539613	0	0	3.83353	5.19586	UBE2K
positive regulation of urine volume (GO:0035810)	1/7	0.257851	0.539613	0	0	3.83353	5.19586	INPP5K
positive regulation of vesicle fusion (GO:0031340)	1/7	0.257851	0.539613	0	0	3.83353	5.19586	C2CD5
positive regulation of voltage-gated calcium channel activity (GO:1901387)	1/7	0.257851	0.539613	0	0	3.83353	5.19586	CACNB2
protein localization to cytoplasmic stress granule (GO:1903608)	1/7	0.257851	0.539613	0	0	3.83353	5.19586	DDX3X
proton-transporting ATP synthase complex assembly (GO:0043461)	1/7	0.257851	0.539613	0	0	3.83353	5.19586	ATPAF1
purine ribonucleoside metabolic process (GO:0046128)	1/7	0.257851	0.539613	0	0	3.83353	5.19586	NT5C2
regulation of bone remodeling (GO:0046850)	1/7	0.257851	0.539613	0	0	3.83353	5.19586	SYT7
regulation of cGMP-mediated signaling (GO:0010752)	1/7	0.257851	0.539613	0	0	3.83353	5.19586	RUNDC3A
regulation of cortisol biosynthetic process (GO:2000064)	1/7	0.257851	0.539613	0	0	3.83353	5.19586	DGKQ
regulation of dopamine metabolic process (GO:0042053)	1/7	0.257851	0.539613	0	0	3.83353	5.19586	CHRNB2
regulation of endothelial cell chemotaxis to fibroblast growth factor (GO:2000544)	1/7	0.257851	0.539613	0	0	3.83353	5.19586	FGF1
regulation of glial cell differentiation (GO:0045685)	1/7	0.257851	0.539613	0	0	3.83353	5.19586	EPHA4
regulation of hemoglobin biosynthetic process (GO:0046984)	1/7	0.257851	0.539613	0	0	3.83353	5.19586	SLC6A9
regulation of histone deacetylase activity (GO:1901725)	1/7	0.257851	0.539613	0	0	3.83353	5.19586	SPHK2
regulation of lens fiber cell differentiation (GO:1902746)	1/7	0.257851	0.539613	0	0	3.83353	5.19586	SPRED3
regulation of microtubule binding (GO:1904526)	1/7	0.257851	0.539613	0	0	3.83353	5.19586	PPP2CA
regulation of morphogenesis of an epithelium (GO:1905330)	1/7	0.257851	0.539613	0	0	3.83353	5.19586	FGF1
regulation of necrotic cell death (GO:0010939)	1/7	0.257851	0.539613	0	0	3.83353	5.19586	HEBP2
regulation of non-membrane spanning protein tyrosine kinase activity (GO:1903995)	1/7	0.257851	0.539613	0	0	3.83353	5.19586	DOCK3
regulation of protein deubiquitination (GO:0090085)	1/7	0.257851	0.539613	0	0	3.83353	5.19586	WDR48
regulation of relaxation of muscle (GO:1901077)	1/7	0.257851	0.539613	0	0	3.83353	5.19586	SRI
regulation of respiratory system process (GO:0044065)	1/7	0.257851	0.539613	0	0	3.83353	5.19586	ATP1A2
regulation of toll-like receptor 7 signaling pathway (GO:0034155)	1/7	0.257851	0.539613	0	0	3.83353	5.19586	DDX3X
regulation of tubulin deacetylation (GO:0090043)	1/7	0.257851	0.539613	0	0	3.83353	5.19586	TPPP
regulation of vesicle size (GO:0097494)	1/7	0.257851	0.539613	0	0	3.83353	5.19586	RAB5A
release of sequestered calcium ion into cytosol by endoplasmic reticulum (GO:1903514)	1/7	0.257851	0.539613	0	0	3.83353	5.19586	NOL3
response to alkaloid (GO:0043279)	1/7	0.257851	0.539613	0	0	3.83353	5.19586	CHRNB2
response to host defenses (GO:0052200)	1/7	0.257851	0.539613	0	0	3.83353	5.19586	UBB
response to lead ion (GO:0010288)	1/7	0.257851	0.539613	0	0	3.83353	5.19586	PPP2CA
riboflavin metabolic process (GO:0006771)	1/7	0.257851	0.539613	0	0	3.83353	5.19586	FLAD1
SA node cell action potential (GO:0086015)	1/7	0.257851	0.539613	0	0	3.83353	5.19586	ANK2
serine transport (GO:0032329)	1/7	0.257851	0.539613	0	0	3.83353	5.19586	SLC1A4
sinoatrial node development (GO:0003163)	1/7	0.257851	0.539613	0	0	3.83353	5.19586	GJB6
sphingosine-1-phosphate receptor signaling pathway (GO:0003376)	1/7	0.257851	0.539613	0	0	3.83353	5.19586	S1PR1
substrate-dependent cell migration, cell extension (GO:0006930)	1/7	0.257851	0.539613	0	0	3.83353	5.19586	CD2AP
T-helper 17 cell differentiation (GO:0072539)	1/7	0.257851	0.539613	0	0	3.83353	5.19586	STAT3
very long-chain fatty acid catabolic process (GO:0042760)	1/7	0.257851	0.539613	0	0	3.83353	5.19586	SLC27A4
zinc ion import across plasma membrane (GO:0071578)	1/7	0.257851	0.539613	0	0	3.83353	5.19586	SLC39A10
I-kappaB kinase/NF-kappaB signaling (GO:0007249)	4/62	0.258693	0.541013	0	0	1.5877	2.14675	UBB;TAB3;TAB1;AZI2
iron-sulfur cluster assembly (GO:0016226)	2/24	0.264476	0.549809	0	0	2.09178	2.78208	BOLA2;MMS19
lipid translocation (GO:0034204)	2/24	0.264476	0.549809	0	0	2.09178	2.78208	ATP8A2;ATP9A
negative regulation of protein tyrosine kinase activity (GO:0061099)	2/24	0.264476	0.549809	0	0	2.09178	2.78208	CBL;SNX6
negative regulation of synaptic transmission (GO:0050805)	2/24	0.264476	0.549809	0	0	2.09178	2.78208	ACHE;PTEN
positive regulation of carbohydrate metabolic process (GO:0045913)	2/24	0.264476	0.549809	0	0	2.09178	2.78208	PSEN1;SLC4A4
positive regulation of protein targeting to membrane (GO:0090314)	2/24	0.264476	0.549809	0	0	2.09178	2.78208	C2CD5;ANK3
regulation of axon extension involved in axon guidance (GO:0048841)	2/24	0.264476	0.549809	0	0	2.09178	2.78208	SEMA4D;SEMA6D
regulation of ruffle assembly (GO:1900027)	2/24	0.264476	0.549809	0	0	2.09178	2.78208	CARMIL2;NLGN1
sulfur amino acid metabolic process (GO:0000096)	2/24	0.264476	0.549809	0	0	2.09178	2.78208	AHCY;SMS
peptide metabolic process (GO:0006518)	5/83	0.26479	0.550096	0	0	1.47598	1.96131	NPEPPS;DNPEP;GSTA4;ETHE1;PSEN1
negative regulation of type I interferon production (GO:0032480)	3/43	0.266221	0.551973	0	0	1.72617	2.28447	IRF3;PCBP2;TAX1BP1
positive regulation of leukocyte mediated cytotoxicity (GO:0001912)	3/43	0.266221	0.551973	0	0	1.72617	2.28447	CADM1;AP1G1;CYRIB
regulation of cytokine production involved in inflammatory response (GO:1900015)	3/43	0.266221	0.551973	0	0	1.72617	2.28447	CUEDC2;STAT3;APPL1
regulation of cytokinesis (GO:0032465)	5/84	0.272811	0.555755	0	0	1.45722	1.8929	UVRAG;CETN2;FSD1;CALM1;CIT
circulatory system development (GO:0072359)	7/126	0.272986	0.555755	0	0	1.35479	1.75897	STK11;TH;ERBB4;DVL2;PTEN;PDLIM5;WDR11
peptidyl-serine modification (GO:0018209)	9/169	0.273819	0.555755	0	0	1.29586	1.67852	SRPK2;GRK2;CAB39;DGKQ;RPS6KA1;DYRK1A;ULK2;STK38L;STK32C
nucleotide-excision repair (GO:0006289)	6/105	0.273887	0.555755	0	0	1.39562	1.80739	COPS6;COPS5;UBB;CETN2;COPS7A;MMS19
tRNA processing (GO:0008033)	4/64	0.277303	0.555755	0	0	1.53462	1.96837	CTU2;SARS1;CSTF2;ZBTB8OS
intracellular steroid hormone receptor signaling pathway (GO:0030518)	3/44	0.277651	0.555755	0	0	1.68398	2.15784	DDX5;RNF14;UBE3A
metal ion homeostasis (GO:0055065)	3/44	0.277651	0.555755	0	0	1.68398	2.15784	SLC12A2;ANK3;SLC12A6
mitotic spindle assembly (GO:0090307)	3/44	0.277651	0.555755	0	0	1.68398	2.15784	ZNF207;ABRAXAS2;CLASP1
mRNA stabilization (GO:0048255)	3/44	0.277651	0.555755	0	0	1.68398	2.15784	LARP1;ELAVL1;PAIP1
response to amyloid-beta (GO:1904645)	3/44	0.277651	0.555755	0	0	1.68398	2.15784	EPHA4;PSEN1;SNX6
cAMP-mediated signaling (GO:0019933)	2/25	0.280154	0.555755	0	0	2.00073	2.54576	DGKQ;ADCY1
chemical synaptic transmission, postsynaptic (GO:0099565)	2/25	0.280154	0.555755	0	0	2.00073	2.54576	MPP2;CHRNA4
negative regulation of antigen receptor-mediated signaling pathway (GO:0050858)	2/25	0.280154	0.555755	0	0	2.00073	2.54576	DUSP3;PHPT1
organophosphate ester transport (GO:0015748)	2/25	0.280154	0.555755	0	0	2.00073	2.54576	OSBPL8;OSBPL2
outflow tract septum morphogenesis (GO:0003148)	2/25	0.280154	0.555755	0	0	2.00073	2.54576	ROBO2;BMPR2
positive regulation of ERBB signaling pathway (GO:1901186)	2/25	0.280154	0.555755	0	0	2.00073	2.54576	HIP1R;CBL
receptor catabolic process (GO:0032801)	2/25	0.280154	0.555755	0	0	2.00073	2.54576	UVRAG;AP2A1
regulation of calcium ion import (GO:0090279)	2/25	0.280154	0.555755	0	0	2.00073	2.54576	SPHK2;WNK3
regulation of cardiac muscle cell action potential (GO:0098901)	2/25	0.280154	0.555755	0	0	2.00073	2.54576	ANK2;CALM1
regulation of ryanodine-sensitive calcium-release channel activity (GO:0060314)	2/25	0.280154	0.555755	0	0	2.00073	2.54576	SRI;CALM1
RNA splicing, via transesterification reactions (GO:0000375)	2/25	0.280154	0.555755	0	0	2.00073	2.54576	LSM1;MPHOSPH10
sodium ion homeostasis (GO:0055078)	2/25	0.280154	0.555755	0	0	2.00073	2.54576	SLC12A2;ATP1A2
regulation of cell cycle G2/M phase transition (GO:1902749)	5/85	0.280882	0.555755	0	0	1.43893	1.82718	PPP2R1A;CETN2;CKAP5;TUBB4A;CLASP1
positive regulation of protein modification process (GO:0031401)	11/214	0.281553	0.555755	0	0	1.24854	1.58245	PTPA;RAP2A;RALBP1;DDX3X;SEMA4D;ERBB4;DYRK1A;DVL2;PPP2R5A;CALM1;FGF1
nuclear-transcribed mRNA catabolic process (GO:0000956)	9/171	0.285068	0.555755	0	0	1.27973	1.6061	PPP2CA;UPF1;DDX5;PPP2R1A;LSM1;PYM1;GSPT2;GSPT1;EIF4G1
chemical homeostasis (GO:0048878)	4/65	0.286689	0.555755	0	0	1.50938	1.88576	DDX3X;WNK2;WNK3;SLC4A4
inorganic anion transmembrane transport (GO:0098661)	4/65	0.286689	0.555755	0	0	1.50938	1.88576	SLC12A2;GABRB2;SLC1A1;SLC12A6
actin filament reorganization (GO:0090527)	1/8	0.28881	0.555755	0	0	3.28571	4.08081	DMTN
adenylate cyclase-inhibiting G protein-coupled acetylcholine receptor signaling pathway (GO:0007197)	1/8	0.28881	0.555755	0	0	3.28571	4.08081	CHRM4
ammonium transmembrane transport (GO:0072488)	1/8	0.28881	0.555755	0	0	3.28571	4.08081	SLC12A6
anterograde axonal protein transport (GO:0099641)	1/8	0.28881	0.555755	0	0	3.28571	4.08081	MAPK8IP3
aromatic compound biosynthetic process (GO:0019438)	1/8	0.28881	0.555755	0	0	3.28571	4.08081	GCH1
atrial cardiac muscle cell to AV node cell signaling (GO:0086026)	1/8	0.28881	0.555755	0	0	3.28571	4.08081	ANK2
axo-dendritic protein transport (GO:0099640)	1/8	0.28881	0.555755	0	0	3.28571	4.08081	MAPK8IP3
basic amino acid transport (GO:0015802)	1/8	0.28881	0.555755	0	0	3.28571	4.08081	SLC38A3
cardiac atrium development (GO:0003230)	1/8	0.28881	0.555755	0	0	3.28571	4.08081	ANK2
cardiac muscle hypertrophy (GO:0003300)	1/8	0.28881	0.555755	0	0	3.28571	4.08081	INPP5F
cell-cell adhesion mediated by cadherin (GO:0044331)	1/8	0.28881	0.555755	0	0	3.28571	4.08081	AFDN
cellular response to angiotensin (GO:1904385)	1/8	0.28881	0.555755	0	0	3.28571	4.08081	AHCYL1
cellular response to hepatocyte growth factor stimulus (GO:0035729)	1/8	0.28881	0.555755	0	0	3.28571	4.08081	APPL1
cellular response to potassium ion (GO:0035865)	1/8	0.28881	0.555755	0	0	3.28571	4.08081	SLC12A2
cellular response to UV-B (GO:0071493)	1/8	0.28881	0.555755	0	0	3.28571	4.08081	STK11
[truncated: 1,582 more rows]

## Sheet: APEX_MF
Term	Overlap	P-value	Adjusted P-value	Old P-value	Old Adjusted P-value	Odds Ratio	Combined Score	Genes
[truncated: 578 more rows]

[truncated: 4 more sheets: APEX_CC, Ctx_BP, Ctx_MF, Ctx_CC]
