# Supplementary material for: Subcellular proteomics of dopamine neurons in the mouse brain
Source: eLife. 2022 Jan 31;11:e70921. doi: 10.7554/eLife.70921 (PMC8860448; doi:10.7554/eLife.70921)
Supplement: Figure 5—source data 1. [file elife-70921-fig5-data1.xlsx]

## Sheet: Sheet1
Figure 4 -- source data 1
Protein abbreviations related to Figure 4f
Abbrev. in panel f	Protein Name	Mouse Gene Symbol
Kv1.2	Potassium voltage-gated channel subfamily A member 2	Kcna2
Kv1.6	Potassium voltage-gated channel subfamily A member 6	Kcna6
GIRK2	G protein-activated inward rectifier potassium channel 2	Kcnj6
D2R	D(2) dopamine receptor	Drd2
G β2	Guanine nucleotide-binding protein G(I)/G(S)/G(T) subunit beta-2	Gnb2
G γ3	Guanine nucleotide-binding protein G(I)/G(S)/G(O) subunit gamma-3	Gng3
G γ4	Guanine nucleotide-binding protein G(I)/G(S)/G(O) subunit gamma-4	Gng4
G(i2)α	Guanine nucleotide-binding protein G(i) subunit alpha-2	Gnai2
G(o)α	Guanine nucleotide-binding protein G(o) subunit alpha	Gnao1
NCS1	Neuronal calcium sensor 1	Ncs1
AC1	Adenylate cyclase type 1	Adcy1
AC3	Adenylate cyclase type 3	Adcy3
AC9	Adenylate cyclase type 9	Adcy9
C-α	cAMP-dependent protein kinase catalytic subunit alpha	Prkaca
C-β	cAMP-dependent protein kinase catalytic subunit beta	Prkacb
R-1β	cAMP-dependent protein kinase type I-beta regulatory subunit	Prkar1b
R-2β	cAMP-dependent protein kinase type II-beta regulatory subunit	Prkar2b
AKAP-12	A-kinase anchor protein 12	Akap12
D-AKAP-2	A-kinase anchor protein 10, mitochondrial	Akap10
nAchR α4	Neuronal acetylcholine receptor subunit alpha-4	Chrna4
nAchR α5	Neuronal acetylcholine receptor subunit alpha-5	Chrna5
nAchR α6	Neuronal acetylcholine receptor subunit alpha-6	Chrna6
nAchR β2	Neuronal acetylcholine receptor subunit beta-2	Chrnb2
nAchR β3	Neuronal acetylcholine receptor subunit beta-3	Chrnb3
BARP	Voltage-dependent calcium channel beta subunit-associated regulatory protein	Cbarp
CaV2.1	Voltage-dependent P/Q-type calcium channel subunit alpha-1A	Cacna1a
CaV2.2	Voltage-dependent N-type calcium channel subunit alpha-1B	Cacna1b
CaV2.3	Voltage-dependent R-type calcium channel subunit alpha-1E	Cacna1e
α2/δ	Voltage-dependent calcium channel subunit alpha-2/delta-1	Cacna2d1
β1	Voltage-dependent L-type calcium channel subunit beta-1	Cacnb1
β2	Voltage-dependent L-type calcium channel subunit beta-2	Cacnb2
β3	Voltage-dependent L-type calcium channel subunit beta-3	Cacnb3
β4	Voltage-dependent L-type calcium channel subunit beta-4	Cacnb4
Nav1.1	NaV 1.1 subunpit alpha	Scn1a
Nav1.2	NaV 1.2 subunit alpha	Scn2a
Nav1.6	NaV 1.6 subunit alpha	Scn8a
“Dopamine Metabolism”
Abbrev. in panel f	Protein Name	Mouse Gene Symbol
GTP-CH1	GTP cyclohydrolase 1	Gch1
PTPS	6-pyruvoyl tetrahydrobiopterin synthase	Pts
SR	Sepiapterin reductase	Spr
TH	Tyrosine hydroxylase	Th
AADC	Aromatic-L-amino-acid decarboxylase	Ddc
DAT	Sodium-dependent dopamine transporter	Slc6a3
VMAT2	Synaptic vesicular amine transporter	Slc18a2
SLC10A4	Sodium/bile acid cotransporter 4	Slc10a4
V-ATPase A	V-type proton ATPase catalytic subunit A	Atp6v1a
V-ATPase B2	V-type proton ATPase catalytic subunit B2	Atp6v1b2
V-ATPase C1	V-type proton ATPase catalytic subunit C1	Atp6v1c1
V-ATPase D1	V-type proton ATPase catalytic subunit D1	Atp6v1d
V-ATPase E1	V-type proton ATPase catalytic subunit E1	Atp6v1e1
V-ATPase F	V-type proton ATPase catalytic subunit F	Atp6v1f
V-ATPase H	V-type proton ATPase catalytic subunit H	Atp6v1h
MAO-A	Monoamine oxidase type A	Maoa
MAO-B	Monoamine oxidase type B	Maob
ALR	Aldo-keto reductase family 1 member A1	Akr1a1
AR	Aldo-keto reductase family 1 member B1	Akr1b1
ALDH1A1	Retinal dehydrogenase 1	Aldh1a1
“Dopamine Metabolism”
Abbrev. in panel f	Metabolite Name
GTP	Guanosine triphosphate
NH2P3	Dihydroneopterin triphosphate
6-PPH4	6-Pyruvoyltetrahydropterin
BH4	Tetrahydrobiopterin
L-DOPA	L-3,4-Dihydroxyphenylalanine
DOPAL	3,4-Dihydroxyphenylacetaldehyde
DOPET	3,4-Dihydroxyphenylethanol
DOPAC	3,4-Dihydroxyphenylacetic acid
“Active Zone”
Abbrev. in panel f	Protein Name	Mouse Gene Symbol
PTPR-D	Receptor-type tyrosine-protein phosphatase delta	Ptprd
PTPR-S	Receptor-type tyrosine-protein phosphatase S	Ptprs
CAPS	Calcium-dependent secretion activator 1	Cadps
CAPS2	Calcium-dependent secretion activator 2	Cadps2
STX-1A	Syntaxin-1A	Stx1a
STX-1B	Syntaxin-1B	Stx1b
NSF	Vesicle-fusing ATPase (N-ethylmaleimide-sensitive fusion protein)	Nsf
SNAP-α	Alpha-soluble NSF attachment protein	Napa
SNAP-β	Beta-soluble NSF attachment protein	Napb
SNAP25	Synaptosomal-associated protein 25	Snap25
CPLX1	Complexin-1	Cplx1
CPLX2	Complexin-2	Cplx2
VAMP-2	Vesicle-associated membrane protein 2 (Synaptobrevin-2)	Vamp2
Munc18-1	Syntaxin-binding protein 1	Stxbp1
CSPα	DnaJ homolog subfamily C member 5	Dnajc5
SYT-1	Synaptotagmin-1	Syt1
RAB3A	Ras-related protein Rab-3A	Rab3a
RAB3B	Ras-related protein Rab-3B	Rab3b
RAB3C	Ras-related protein Rab-3C	Rab3c
RIM1	Regulating synaptic membrane exocytosis protein 1	Rims1
Munc13-1	Protein unc-13 homolog A	Unc13a
Liprin-α2	Liprin-alpha-2	Ppfia2
Liprin-α3	Liprin-alpha-3	Ppfia3
Bassoon	Protein bassoon	Bsn
Piccolo	Protein piccolo	Pclo
ELKS1	ELKS/Rab6-interacting/CAST family member 1	Erc1
ELKS2	ERC protein 2	Erc2
RIM-BP2	RIMS-binding protein 2	Rimbp2
α-synuclein	Alpha-synuclein	Snca
β-synuclein	Beta-synuclein	Sncb
γ-synuclein	Gamma-synuclein	Sncg
SYNGR1	Synaptogyrin-1	Syngr1
SYNGR3	Synaptogyrin-3	Syngr3
SV2A	Synaptic vesicle glycoprotein 2A	Sv2a
SV2B	Synaptic vesicle glycoprotein 2B	Sv2b
SV2C	Synaptic vesicle glycoprotein 2C	Sv2c
SVOP	Synaptic vesicle 2-related protein	Svop
SYN-1	Synapsin-1	Syn1
SYT-7	Synaptotagmin-7	Syt7
SYP	Synaptophysin	Syp
