# Supplementary material for: Subcellular proteomics of dopamine neurons in the mouse brain
Source: eLife. 2022 Jan 31;11:e70921. doi: 10.7554/eLife.70921 (PMC8860448; doi:10.7554/eLife.70921)
Supplement: Figure 5—source data 2. [file elife-70921-fig5-data2.xlsx]

## Sheet: Ontologies
GO term ID	user interface reference code	GO domain	GO term name	GO term name - hierarchical structure	GO parent term ID	GSEA p-value	GSEA 'gene cluster' FDR corrected p-value	genes - hgnc_id	genes - hgnc_symbol	genes - your genelist input
GO:0045202		CC	synapse	synapse		8.98599e-112	3.41467e-110	HGNC:18583;HGNC:18370;HGNC:18263;HGNC:14244;HGNC:3758;HGNC:9317;HGNC:13760;HGNC:9390;HGNC:12666;HGNC:29647;HGNC:8554;HGNC:3300;HGNC:3211;HGNC:3265;HGNC:6838;HGNC:13476;HGNC:1052;HGNC:3711;HGNC:7642;HGNC:12005;HGNC:2464;HGNC:23366;HGNC:12363;HGNC:9246;HGNC:9247;HGNC:17787;HGNC:9302;HGNC:9314;HGNC:9315;HGNC:1435;HGNC:4227;HGNC:11026;HGNC:380;HGNC:3015;HGNC:3192;HGNC:10831;HGNC:10830;HGNC:9299;HGNC:…	PPM1H;RAB1B;RAB21;RAB18;FLOT2;PPP3R1;CYFIP2;PRKAR1B;VCP;MAGI3;PABPC1;EIF5A;EEF1D;EIF2S1;MAP1LC3A;TTYH1;BIN1;FKBP1A;NAPG;TPD52;VCAN;ARPC5L;TSC2;PPFIA2;PPFIA3;LIN7A;PPP2R1A;PPP3CA;PPP3CB;CALB2;GDI2;SLC3A2;AKR1A1;DPYSL3;EEF1A2;SH3GL2;SH3GL1;PPP2CA;CORO1A;ABLIM3;CDH11;YWHAQ;MADD;ARFGAP1;PPP2R2A;YWHAG;YWHAE;YWHAH;USP46;EIF3L;EIF4G3;EIF5;RHEB;AP2M1;AP2B1;RAP2A;RHOB;TBC1D24;OGT;NPTN;RALA;SYT3;SLC2A3;RAB…	MGI:2442087;MGI:1923558;MGI:894308;MGI:102790;MGI:103309;MGI:107172;MGI:1924134;MGI:97759;MGI:99919;MGI:1923484;MGI:1349722;MGI:106248;MGI:1913906;MGI:95299;MGI:1915661;MGI:1889007;MGI:108092;MGI:95541;MGI:104561;MGI:107749;MGI:102889;MGI:1921442;MGI:102548;MGI:2443834;MGI:1924037;MGI:2135609;MGI:1926334;MGI:107164;MGI:107163;MGI:101914;MGI:99845;MGI:96955;MGI:1929955;MGI:1349762;MGI:1096317;MGI:…
GO:0097060	A1	CC	synaptic membrane	├─ synaptic membrane	GO:0045202	0.0149025	0.0171605	HGNC:17867;HGNC:9861;HGNC:9839;HGNC:11511;HGNC:11007	NPTN;RAP2A;RALA;SYT3;SLC2A3	MGI:108077;MGI:97855;MGI:1927243;MGI:99665;MGI:95757
GO:0099243	A2	CC	extrinsic component of synaptic membrane	│ ├─ extrinsic component of synaptic membrane	GO:0097060
GO:0099699	A3	CC	integral component of synaptic membrane	│ └─ integral component of synaptic membrane	GO:0097060			HGNC:11511;HGNC:11007	SYT3;SLC2A3	MGI:99665;MGI:95757
GO:0098793	B1	CC	presynapse	├─ presynapse	GO:0045202	3.50251e-67	6.65476e-66	HGNC:9758;HGNC:9786;HGNC:14902;HGNC:1404;HGNC:3014;HGNC:1401;HGNC:1426;HGNC:16018;HGNC:946;HGNC:2310;HGNC:2309;HGNC:11503;HGNC:7641;HGNC:15751;HGNC:8882;HGNC:581;HGNC:8881;HGNC:1226;HGNC:10750;HGNC:9164;HGNC:16511;HGNC:3084;HGNC:471;HGNC:29125;HGNC:2856;HGNC:5241;HGNC:3242;HGNC:9283;HGNC:12852;HGNC:555;HGNC:12853;HGNC:243;HGNC:244;HGNC:245;HGNC:568;HGNC:20879;HGNC:10003;HGNC:23271;HGNC:25412;HGNC…	RAB1A;RAB6A;RAB6B;CACNB4;DPYSL2;CACNB1;CADPS;CADPS2;MAGI1;CPLX2;CPLX1;SYNJ1;NAPA;NAPB;PFN2;APBB1;PFN1;GIPC1;SEPTIN3;SEPTIN5;SEPTIN8;DVL1;AMPH;DNM3;DGKQ;HSPA8;EHD1;PPP1CC;YWHAG;AP1G1;YWHAH;ADD1;ADD2;ADD3;AP3D1;CASKIN1;RGS7;RGS7BP;SGIP1;SH3GL1;DBNL;GRK2;GRK3;PRKACA;PTPRN2;GPM6A;NECAP1;SCRN1;APPL1;ARF6;CD2AP;GAP43;PRKCA;PRKCB;STXBP1;PRKCE;NSF;HTT;NCS1;ANKS1B;MARCKS;CALB1;CAMK2A;CSNK2B;SH3GL2;SNCB;GD…	MGI:97842;MGI:894313;MGI:107283;MGI:103301;MGI:1349763;MGI:102522;MGI:1350922;MGI:2443963;MGI:1203522;MGI:104726;MGI:104727;MGI:1354961;MGI:104563;MGI:104562;MGI:97550;MGI:107765;MGI:97549;MGI:1926252;MGI:1345148;MGI:1195461;MGI:894310;MGI:94941;MGI:103574;MGI:1341299;MGI:102918;MGI:105384;MGI:1341878;MGI:104872;MGI:108109;MGI:101919;MGI:109194;MGI:87918;MGI:87919;MGI:1351615;MGI:107734;MGI:24429…
GO:0099523	B2	CC	presynaptic cytosol	│ ├─ presynaptic cytosol	GO:0098793	5.93991e-10	2.25716e-09	HGNC:9393;HGNC:9395;HGNC:11444;HGNC:9401;HGNC:8016;HGNC:4851;HGNC:3953;HGNC:24600;HGNC:6759;HGNC:1434;HGNC:1460;HGNC:2460;HGNC:10831;HGNC:11140;HGNC:4226;HGNC:9246;HGNC:17677;HGNC:17072;HGNC:8127	PRKCA;PRKCB;STXBP1;PRKCE;NSF;HTT;NCS1;ANKS1B;MARCKS;CALB1;CAMK2A;CSNK2B;SH3GL2;SNCB;GDI1;PPFIA2;RABEP1;ERC1;OGT	MGI:97595;MGI:97596;MGI:107363;MGI:97599;MGI:104560;MGI:96067;MGI:109166;MGI:1924781;MGI:96907;MGI:88248;MGI:88256;MGI:88548;MGI:700009;MGI:1889011;MGI:99846;MGI:2443834;MGI:1860236;MGI:2151013;MGI:1339639
GO:0099569	B3	CC	presynaptic cytoskeleton	│ ├─ presynaptic cytoskeleton	GO:0098793			HGNC:144	ACTG1	MGI:87906
GO:0099182	B12	CC	presynaptic intermediate filament cytoskeleton	│ │ ├─ presynaptic intermediate filament cytoskeleton	GO:0099569
GO:0099143	B13	CC	presynaptic actin cytoskeleton	│ │ └─ presynaptic actin cytoskeleton	GO:0099569			HGNC:144	ACTG1	MGI:87906
GO:0048786	B4	CC	presynaptic active zone	│ ├─ presynaptic active zone	GO:0098793	4.81911e-12	2.28908e-11	HGNC:30669;HGNC:661;HGNC:9247;HGNC:1389;HGNC:17282;HGNC:1117;HGNC:13406;HGNC:30339;HGNC:17072;HGNC:31922;HGNC:2494;HGNC:2510;HGNC:11444;HGNC:7641;HGNC:578;HGNC:12669;HGNC:15751;HGNC:3758;HGNC:1399;HGNC:17867;HGNC:815;HGNC:817;HGNC:1388;HGNC:4460;HGNC:10596;HGNC:4572;HGNC:4584;HGNC:6284;HGNC:9706;HGNC:8008;HGNC:11433;HGNC:6139;HGNC:4573	SNAP47;ARFGAP3;PPFIA3;CACNA1B;RIMS1;BSN;PCLO;RIMBP2;ERC1;ERC2;CTBP1;CTNNA2;STXBP1;NAPA;APBA1;VDAC1;NAPB;FLOT2;CACNA2D1;NPTN;ATP2B2;ATP2B4;CACNA1A;GPM6A;SCN8A;GRIA2;GRIN1;KCNMA1;NECTIN1;NRXN1;STX1A;ITGA3;GRIA3	MGI:1915076;MGI:1913501;MGI:1924037;MGI:88296;MGI:2152971;MGI:1277955;MGI:1349390;MGI:2443235;MGI:2151013;MGI:1098749;MGI:1201685;MGI:88275;MGI:107363;MGI:104563;MGI:1860297;MGI:106919;MGI:104562;MGI:103309;MGI:88295;MGI:108077;MGI:105368;MGI:88111;MGI:109482;MGI:107671;MGI:103169;MGI:95809;MGI:95819;MGI:99923;MGI:1926483;MGI:1096391;MGI:109355;MGI:96602;MGI:95810
GO:0098831	B14	CC	presynaptic active zone cytoplasmic component	│ │ ├─ presynaptic active zone cytoplasmic component	GO:0048786	2.62066e-05	4.74214e-05	HGNC:17282;HGNC:1117;HGNC:13406;HGNC:30339;HGNC:17072;HGNC:31922;HGNC:2494;HGNC:2510;HGNC:9247;HGNC:11444	RIMS1;BSN;PCLO;RIMBP2;ERC1;ERC2;CTBP1;CTNNA2;PPFIA3;STXBP1	MGI:2152971;MGI:1277955;MGI:1349390;MGI:2443235;MGI:2151013;MGI:1098749;MGI:1201685;MGI:88275;MGI:1924037;MGI:107363
GO:0048787	B15	CC	presynaptic active zone membrane	│ │ └─ presynaptic active zone membrane	GO:0048786	3.92907e-08	9.95364e-08	HGNC:7641;HGNC:578;HGNC:12669;HGNC:15751;HGNC:3758;HGNC:1399;HGNC:17282;HGNC:17867;HGNC:815;HGNC:817;HGNC:1388;HGNC:4460;HGNC:10596;HGNC:4572;HGNC:4584;HGNC:6284;HGNC:9706;HGNC:8008;HGNC:11433;HGNC:6139;HGNC:4573	NAPA;APBA1;VDAC1;NAPB;FLOT2;CACNA2D1;RIMS1;NPTN;ATP2B2;ATP2B4;CACNA1A;GPM6A;SCN8A;GRIA2;GRIN1;KCNMA1;NECTIN1;NRXN1;STX1A;ITGA3;GRIA3	MGI:104563;MGI:1860297;MGI:106919;MGI:104562;MGI:103309;MGI:88295;MGI:2152971;MGI:108077;MGI:105368;MGI:88111;MGI:109482;MGI:107671;MGI:103169;MGI:95809;MGI:95819;MGI:99923;MGI:1926483;MGI:1096391;MGI:109355;MGI:96602;MGI:95810
GO:0099029	B27	CC	anchored component of presynaptic active zone membrane	│ │ ├─ anchored component of presynaptic active zone membrane	GO:0048787			HGNC:3758;HGNC:1399	FLOT2;CACNA2D1	MGI:103309;MGI:88295
GO:0098891	B28	CC	extrinsic component of presynaptic active zone membrane	│ │ ├─ extrinsic component of presynaptic active zone membrane	GO:0048787			HGNC:17282	RIMS1	MGI:2152971
GO:0099059	B29	CC	integral component of presynaptic active zone membrane	│ │ └─ integral component of presynaptic active zone membrane	GO:0048787	3.42958e-05	5.92383e-05	HGNC:17867;HGNC:815;HGNC:817;HGNC:1388;HGNC:4460;HGNC:10596;HGNC:4572;HGNC:4584;HGNC:6284;HGNC:9706;HGNC:8008;HGNC:11433;HGNC:6139;HGNC:4573	NPTN;ATP2B2;ATP2B4;CACNA1A;GPM6A;SCN8A;GRIA2;GRIN1;KCNMA1;NECTIN1;NRXN1;STX1A;ITGA3;GRIA3	MGI:108077;MGI:105368;MGI:88111;MGI:109482;MGI:107671;MGI:103169;MGI:95809;MGI:95819;MGI:99923;MGI:1926483;MGI:1096391;MGI:109355;MGI:96602;MGI:95810
GO:0098833	B5	CC	presynaptic endocytic zone	│ ├─ presynaptic endocytic zone	GO:0098793	7.19236e-10	2.48463e-09	HGNC:8570;HGNC:6183;HGNC:471;HGNC:2092;HGNC:8996;HGNC:2972;HGNC:2973;HGNC:2091;HGNC:2090;HGNC:21604;HGNC:15514;HGNC:14986;HGNC:564;HGNC:563;HGNC:2494;HGNC:15469	PACSIN1;ITSN1;AMPH;CLTC;PIP5K1C;DNM1;DNM1L;CLTB;CLTA;EPN1;PICALM;SNAP91;AP2M1;AP2B1;CTBP1;DNAJC6	MGI:1345181;MGI:1338069;MGI:103574;MGI:2388633;MGI:1298224;MGI:107384;MGI:1921256;MGI:1921575;MGI:894297;MGI:1333763;MGI:2385902;MGI:109132;MGI:1298405;MGI:1919020;MGI:1201685;MGI:1919935
GO:0098835	B16	CC	presynaptic endocytic zone membrane	│ │ └─ presynaptic endocytic zone membrane	GO:0098833	4.21143e-09	1.23103e-08	HGNC:2092;HGNC:8996;HGNC:2972;HGNC:2973;HGNC:2091;HGNC:2090;HGNC:21604;HGNC:15514;HGNC:14986;HGNC:471;HGNC:564;HGNC:563;HGNC:2494;HGNC:15469	CLTC;PIP5K1C;DNM1;DNM1L;CLTB;CLTA;EPN1;PICALM;SNAP91;AMPH;AP2M1;AP2B1;CTBP1;DNAJC6	MGI:2388633;MGI:1298224;MGI:107384;MGI:1921256;MGI:1921575;MGI:894297;MGI:1333763;MGI:2385902;MGI:109132;MGI:103574;MGI:1298405;MGI:1919020;MGI:1201685;MGI:1919935
GO:0098894	B30	CC	extrinsic component of presynaptic endocytic zone membrane	│ │ └─ extrinsic component of presynaptic endocytic zone membrane	GO:0098835	1.83806e-05	3.67613e-05	HGNC:21604;HGNC:15514;HGNC:14986;HGNC:471;HGNC:564;HGNC:563;HGNC:2494;HGNC:15469	EPN1;PICALM;SNAP91;AMPH;AP2M1;AP2B1;CTBP1;DNAJC6	MGI:1333763;MGI:2385902;MGI:109132;MGI:103574;MGI:1298405;MGI:1919020;MGI:1201685;MGI:1919935
GO:0098830	B6	CC	presynaptic endosome	│ ├─ presynaptic endosome	GO:0098793	0.0198073	0.0215051	HGNC:568;HGNC:25507;HGNC:11175	AP3D1;VAC14;SNX4	MGI:107734;MGI:2157980;MGI:1916400
GO:0098954	B17	CC	presynaptic endosome membrane	│ │ └─ presynaptic endosome membrane	GO:0098830
GO:0099067	B31	CC	integral component of presynaptic endosome membrane	│ │ └─ integral component of presynaptic endosome membrane	GO:0098954
GO:0008021	B7	CC	synaptic vesicle	│ ├─ synaptic vesicle	GO:0098793	2.61619e-28	2.48538e-27	HGNC:17145;HGNC:2938;HGNC:11501;HGNC:14579;HGNC:30389;HGNC:10700;HGNC:11133;HGNC:13490;HGNC:9394;HGNC:9246;HGNC:11138;HGNC:2973;HGNC:2090;HGNC:2091;HGNC:10831;HGNC:9767;HGNC:9777;HGNC:9778;HGNC:30269;HGNC:16235;HGNC:9783;HGNC:9784;HGNC:9785;HGNC:9774;HGNC:9781;HGNC:16524;HGNC:9763;HGNC:11494;HGNC:471;HGNC:2092;HGNC:10819;HGNC:17056;HGNC:1052;HGNC:4141;HGNC:27007;HGNC:851;HGNC:854;HGNC:13527;HGNC:…	SNAPIN;DMXL2;SYNGR3;VPS45;EXOC4;SEC22B;SNAP29;WDR7;PICK1;PPFIA2;SNCA;DNM1L;CLTA;CLTB;SH3GL2;RAB27B;RAB3A;RAB3B;RAB3C;DNAJC5;RAB5A;RAB5B;RAB5C;RAB35;RAB4A;RAB14;RAB2A;SYN1;AMPH;CLTC;SGTA;RPH3A;BIN1;GAPDH;TPRG1L;ATP6V1A;ATP6V1B2;ATP6V1D;ATP6V1E1;ATP6V1F;ATP6V1G2;ATP6V1H;VAMP2;SCAMP1;VAMP7;SLC10A4;SLC18A2;SLC6A17;SLC6A7;SYPL1;SYP;STX1A;SYNGR1;PTPRN2;SV2B;SV2A;SV2C;STX16;STX7;SYT1;SVOP;ATP6V0D1;ATP6V…	MGI:1333745;MGI:2444630;MGI:1341881;MGI:891965;MGI:1096376;MGI:1338759;MGI:1914724;MGI:1860197;MGI:894645;MGI:2443834;MGI:1277151;MGI:1921256;MGI:894297;MGI:1921575;MGI:700009;MGI:1931295;MGI:97843;MGI:1917158;MGI:1914545;MGI:892995;MGI:105926;MGI:105938;MGI:105306;MGI:1924657;MGI:105069;MGI:1915615;MGI:1928750;MGI:98460;MGI:103574;MGI:2388633;MGI:1098703;MGI:102788;MGI:108092;MGI:95640;MGI:19150…
GO:0034592	B18	CC	synaptic vesicle lumen	│ │ ├─ synaptic vesicle lumen	GO:0008021
GO:0030672	B19	CC	synaptic vesicle membrane	│ │ └─ synaptic vesicle membrane	GO:0008021	1.92667e-24	1.46427e-23	HGNC:11138;HGNC:2973;HGNC:2090;HGNC:2091;HGNC:10831;HGNC:9767;HGNC:9777;HGNC:9778;HGNC:30269;HGNC:16235;HGNC:9783;HGNC:9784;HGNC:9785;HGNC:9774;HGNC:9781;HGNC:16524;HGNC:9763;HGNC:11494;HGNC:471;HGNC:2092;HGNC:10819;HGNC:17056;HGNC:1052;HGNC:4141;HGNC:11133;HGNC:27007;HGNC:851;HGNC:854;HGNC:13527;HGNC:857;HGNC:16832;HGNC:862;HGNC:18303;HGNC:12643;HGNC:10563;HGNC:11486;HGNC:22980;HGNC:10935;HGNC:3…	SNCA;DNM1L;CLTA;CLTB;SH3GL2;RAB27B;RAB3A;RAB3B;RAB3C;DNAJC5;RAB5A;RAB5B;RAB5C;RAB35;RAB4A;RAB14;RAB2A;SYN1;AMPH;CLTC;SGTA;RPH3A;BIN1;GAPDH;SNAP29;TPRG1L;ATP6V1A;ATP6V1B2;ATP6V1D;ATP6V1E1;ATP6V1F;ATP6V1G2;ATP6V1H;VAMP2;SCAMP1;VAMP7;SLC10A4;SLC18A2;SLC6A17;SLC6A7;SYPL1;SYP;STX1A;SYNGR1;PTPRN2;SV2B;SV2A;SV2C;STX16;STX7;SYT1;SVOP;ATP6V0D1;ATP6V0A1	MGI:1277151;MGI:1921256;MGI:894297;MGI:1921575;MGI:700009;MGI:1931295;MGI:97843;MGI:1917158;MGI:1914545;MGI:892995;MGI:105926;MGI:105938;MGI:105306;MGI:1924657;MGI:105069;MGI:1915615;MGI:1928750;MGI:98460;MGI:103574;MGI:2388633;MGI:1098703;MGI:102788;MGI:108092;MGI:95640;MGI:1914724;MGI:1915058;MGI:1201780;MGI:109618;MGI:1921084;MGI:894326;MGI:1913394;MGI:1913487;MGI:1914864;MGI:1313277;MGI:13494…
GO:0098993	B32	CC	anchored component of synaptic vesicle membrane	│ │ ├─ anchored component of synaptic vesicle membrane	GO:0030672	2.81613e-07	6.29488e-07	HGNC:9767;HGNC:9777;HGNC:9778;HGNC:30269;HGNC:16235;HGNC:9783;HGNC:9784;HGNC:9785;HGNC:9774;HGNC:9781;HGNC:16524;HGNC:9763	RAB27B;RAB3A;RAB3B;RAB3C;DNAJC5;RAB5A;RAB5B;RAB5C;RAB35;RAB4A;RAB14;RAB2A	MGI:1931295;MGI:97843;MGI:1917158;MGI:1914545;MGI:892995;MGI:105926;MGI:105938;MGI:105306;MGI:1924657;MGI:105069;MGI:1915615;MGI:1928750
GO:0098850	B33	CC	extrinsic component of synaptic vesicle membrane	│ │ ├─ extrinsic component of synaptic vesicle membrane	GO:0030672	1.84716e-09	5.84933e-09	HGNC:11494;HGNC:471;HGNC:2092;HGNC:10819;HGNC:17056;HGNC:1052;HGNC:4141;HGNC:11133;HGNC:27007;HGNC:851;HGNC:854;HGNC:13527;HGNC:857;HGNC:16832;HGNC:862;HGNC:18303	SYN1;AMPH;CLTC;SGTA;RPH3A;BIN1;GAPDH;SNAP29;TPRG1L;ATP6V1A;ATP6V1B2;ATP6V1D;ATP6V1E1;ATP6V1F;ATP6V1G2;ATP6V1H	MGI:98460;MGI:103574;MGI:2388633;MGI:1098703;MGI:102788;MGI:108092;MGI:95640;MGI:1914724;MGI:1915058;MGI:1201780;MGI:109618;MGI:1921084;MGI:894326;MGI:1913394;MGI:1913487;MGI:1914864
GO:0030285	B34	CC	integral component of synaptic vesicle membrane	│ │ └─ integral component of synaptic vesicle membrane	GO:0030672	1.08549e-08	2.94633e-08	HGNC:12643;HGNC:10563;HGNC:11486;HGNC:22980;HGNC:10935;HGNC:31399;HGNC:11054;HGNC:11507;HGNC:11506;HGNC:11433;HGNC:11498;HGNC:9677;HGNC:16874;HGNC:20566;HGNC:30670;HGNC:11431;HGNC:11442;HGNC:11509;HGNC:25417;HGNC:13724;HGNC:865	VAMP2;SCAMP1;VAMP7;SLC10A4;SLC18A2;SLC6A17;SLC6A7;SYPL1;SYP;STX1A;SYNGR1;PTPRN2;SV2B;SV2A;SV2C;STX16;STX7;SYT1;SVOP;ATP6V0D1;ATP6V0A1	MGI:1313277;MGI:1349480;MGI:1096399;MGI:3606480;MGI:106677;MGI:2442535;MGI:2147363;MGI:108081;MGI:98467;MGI:109355;MGI:1328323;MGI:107418;MGI:1927338;MGI:1927139;MGI:1922459;MGI:1923396;MGI:1858210;MGI:99667;MGI:1915916;MGI:1201778;MGI:103286
GO:0098992	B8	CC	neuronal dense core vesicle	│ ├─ neuronal dense core vesicle	GO:0098793	0.0156594	0.0175017	HGNC:2938;HGNC:10935;HGNC:30757;HGNC:4385;HGNC:1399;HGNC:3084;HGNC:1426	DMXL2;SLC18A2;STXBP5L;GNAI2;CACNA2D1;DVL1;CADPS	MGI:2444630;MGI:106677;MGI:2443815;MGI:95772;MGI:88295;MGI:94941;MGI:1350922
GO:0099013	B20	CC	neuronal dense core vesicle lumen	│ │ ├─ neuronal dense core vesicle lumen	GO:0098992
GO:0099012	B21	CC	neuronal dense core vesicle membrane	│ │ └─ neuronal dense core vesicle membrane	GO:0098992			HGNC:1426;HGNC:10935	CADPS;SLC18A2	MGI:1350922;MGI:106677
GO:0098674	B35	CC	extrinsic component of neuronal dense core vesicle membrane	│ │ ├─ extrinsic component of neuronal dense core vesicle membrane	GO:0099012			HGNC:1426	CADPS	MGI:1350922
GO:0099066	B36	CC	integral component of neuronal dense core vesicle membrane	│ │ └─ integral component of neuronal dense core vesicle membrane	GO:0099012			HGNC:10935	SLC18A2	MGI:106677
GO:0042734	B9	CC	presynaptic membrane	│ ├─ presynaptic membrane	GO:0098793	1.33021e-10	5.61645e-10	HGNC:1717;HGNC:815;HGNC:30500;HGNC:9246;HGNC:11132;HGNC:6759;HGNC:23271;HGNC:11444;HGNC:2510;HGNC:6222;HGNC:6220;HGNC:17601;HGNC:3388;HGNC:6267;HGNC:5951;HGNC:1389;HGNC:1392;HGNC:801;HGNC:18747;HGNC:10588;HGNC:11042;HGNC:11054;HGNC:11049;HGNC:9681;HGNC:8008;HGNC:20973;HGNC:11433;HGNC:4572;HGNC:4573;HGNC:11514;HGNC:10585;HGNC:4584;HGNC:1958;HGNC:1962;HGNC:4507;HGNC:9668;HGNC:13830;HGNC:6470	SEPTIN7;ATP2B2;PRRT2;PPFIA2;SNAP25;MARCKS;RGS7BP;STXBP1;CTNNA2;KCNA4;KCNA2;CADM3;EPHA4;KCNJ6;CADM1;CACNA1B;CACNA1E;ATP1A3;CNTNAP4;SCN2A;SLC6A1;SLC6A7;SLC6A3;PTPRS;NRXN1;ADGRL1;STX1A;GRIA2;GRIA3;SYT7;SCN1A;GRIN1;CHRNA4;CHRNB2;GABBR2;PTPRD;CNTNAP2;L1CAM	MGI:1335094;MGI:105368;MGI:1916267;MGI:2443834;MGI:98331;MGI:96907;MGI:106334;MGI:107363;MGI:88275;MGI:96661;MGI:96659;MGI:2137858;MGI:98277;MGI:104781;MGI:1889272;MGI:88296;MGI:106217;MGI:88107;MGI:2183572;MGI:98248;MGI:95627;MGI:2147363;MGI:94862;MGI:97815;MGI:1096391;MGI:1929461;MGI:109355;MGI:95809;MGI:95810;MGI:1859545;MGI:98246;MGI:95819;MGI:87888;MGI:87891;MGI:2386030;MGI:97812;MGI:1914047…
GO:0099026	B22	CC	anchored component of presynaptic membrane	│ │ ├─ anchored component of presynaptic membrane	GO:0042734	0.0268748	0.0283678	HGNC:11132;HGNC:6759;HGNC:23271	SNAP25;MARCKS;RGS7BP	MGI:98331;MGI:96907;MGI:106334
GO:0098888	B23	CC	extrinsic component of presynaptic membrane	│ │ ├─ extrinsic component of presynaptic membrane	GO:0042734	0.0139061	0.0165135	HGNC:11132;HGNC:11444;HGNC:2510	SNAP25;STXBP1;CTNNA2	MGI:98331;MGI:107363;MGI:88275
GO:0099056	B24	CC	integral component of presynaptic membrane	│ │ └─ integral component of presynaptic membrane	GO:0042734	5.87175e-08	1.39454e-07	HGNC:6222;HGNC:6220;HGNC:17601;HGNC:3388;HGNC:6267;HGNC:5951;HGNC:1389;HGNC:1392;HGNC:801;HGNC:18747;HGNC:10588;HGNC:11042;HGNC:11054;HGNC:11049;HGNC:9681;HGNC:8008;HGNC:20973;HGNC:11433;HGNC:4572;HGNC:4573;HGNC:11514;HGNC:10585;HGNC:4584;HGNC:1958;HGNC:1962;HGNC:4507;HGNC:30500;HGNC:9668;HGNC:13830;HGNC:6470	KCNA4;KCNA2;CADM3;EPHA4;KCNJ6;CADM1;CACNA1B;CACNA1E;ATP1A3;CNTNAP4;SCN2A;SLC6A1;SLC6A7;SLC6A3;PTPRS;NRXN1;ADGRL1;STX1A;GRIA2;GRIA3;SYT7;SCN1A;GRIN1;CHRNA4;CHRNB2;GABBR2;PRRT2;PTPRD;CNTNAP2;L1CAM	MGI:96661;MGI:96659;MGI:2137858;MGI:98277;MGI:104781;MGI:1889272;MGI:88296;MGI:106217;MGI:88107;MGI:2183572;MGI:98248;MGI:95627;MGI:2147363;MGI:94862;MGI:97815;MGI:1096391;MGI:1929461;MGI:109355;MGI:95809;MGI:95810;MGI:1859545;MGI:98246;MGI:95819;MGI:87888;MGI:87891;MGI:2386030;MGI:1916267;MGI:97812;MGI:1914047;MGI:96721
SYNGO:presyn_ribosome	B10	CC	presynaptic ribosome	│ ├─ presynaptic ribosome	GO:0098793
SYNGO:presyn_er	B11	CC	presynaptic ER	│ └─ presynaptic ER	GO:0098793
SYNGO:presyn_er_membrane	B25	CC	presynaptic ER membrane	│ ├─ presynaptic ER membrane	SYNGO:presyn_er
SYNGO:presyn_er_membrane_integral	B37	CC	integral component of presynaptic ER membrane	│ │ └─ integral component of presynaptic ER membrane	SYNGO:presyn_er_membrane
SYNGO:presyn_ser	B26	CC	presynaptic SER	│ └─ presynaptic SER	SYNGO:presyn_er
SYNGO:presyn_ser_membrane	B38	CC	presynaptic SER membrane	│ └─ presynaptic SER membrane	SYNGO:presyn_ser
SYNGO:presyn_ser_membrane_integral	B39	CC	integral component of presynaptic SER membrane	│ └─ integral component of presynaptic SER membrane	SYNGO:presyn_ser_membrane
GO:0043083	C1	CC	synaptic cleft	├─ synaptic cleft	GO:0045202			HGNC:108	ACHE	MGI:87876
GO:0098965	C2	CC	extracellular matrix of synaptic cleft	│ └─ extracellular matrix of synaptic cleft	GO:0043083
GO:0098794	D1	CC	postsynapse	├─ postsynapse	GO:0045202	1.0677e-47	1.35243e-46	HGNC:18708;HGNC:24163;HGNC:21746;HGNC:13759;HGNC:9392;HGNC:10935;HGNC:7666;HGNC:4023;HGNC:10064;HGNC:12732;HGNC:12734;HGNC:2309;HGNC:2310;HGNC:3287;HGNC:3953;HGNC:15751;HGNC:7641;HGNC:8882;HGNC:8881;HGNC:801;HGNC:1464;HGNC:1226;HGNC:9701;HGNC:19092;HGNC:3285;HGNC:3289;HGNC:8590;HGNC:169;HGNC:11275;HGNC:3296;HGNC:24941;HGNC:5044;HGNC:25589;HGNC:1434;HGNC:2856;HGNC:4272;HGNC:24596;HGNC:20284;HGNC:1…	GRIP1;BEGAIN;CPEB3;CYFIP1;PRKAR2B;SLC18A2;NCKAP1;FXR1;TRIM3;WASF1;WASF3;CPLX1;CPLX2;EIF4E;NCS1;NAPB;NAPA;PFN2;PFN1;ATP1A3;CAMK4;GIPC1;PURA;PSD2;EIF4B;EIF4EBP2;PAK1;ACTR2;SPTBN1;EIF4G1;HNRNPA3;HNRNPK;SEPTIN11;CALB1;DGKQ;GIT1;DYNLL2;SIPA1L1;PICALM;RAC1;RHOA;CACNB1;CDK5;PPP1CC;EPN1;ADD2;ADD1;ADD3;AP3D1;RGS7BP;HSPA8;TAOK2;SH3GL2;DBNL;CNN3;HIP1R;MARK2;SPTAN1;AGAP2;CTTN;PRKACA;PRKAR1B;LASP1;RTN4;APPL1;…	MGI:1921303;MGI:3044626;MGI:2443075;MGI:1338801;MGI:97760;MGI:106677;MGI:1355333;MGI:104860;MGI:1860040;MGI:1890563;MGI:2658986;MGI:104727;MGI:104726;MGI:95305;MGI:109166;MGI:104562;MGI:104563;MGI:97550;MGI:97549;MGI:88107;MGI:88258;MGI:1926252;MGI:103079;MGI:1921252;MGI:95304;MGI:109198;MGI:1339975;MGI:1913963;MGI:98388;MGI:2384784;MGI:1917171;MGI:99894;MGI:1277214;MGI:88248;MGI:102918;MGI:19271…
GO:0099524	D2	CC	postsynaptic cytosol	│ ├─ postsynaptic cytosol	GO:0098794	2.47392e-05	4.70044e-05	HGNC:15917;HGNC:9588;HGNC:4851;HGNC:7727;HGNC:3953;HGNC:1434;HGNC:1460;HGNC:2695;HGNC:3287;HGNC:3942;HGNC:8127	PLCB1;PTEN;HTT;NEDD4;NCS1;CALB1;CAMK2A;DBN1;EIF4E;MTOR;OGT	MGI:97613;MGI:109583;MGI:96067;MGI:97297;MGI:109166;MGI:88248;MGI:88256;MGI:1931838;MGI:95305;MGI:1928394;MGI:1339639
GO:0099571	D3	CC	postsynaptic cytoskeleton	│ ├─ postsynaptic cytoskeleton	GO:0098794	0.00016649	0.000263609	HGNC:6759;HGNC:3338;HGNC:2695;HGNC:24011;HGNC:132;HGNC:144;HGNC:6183;HGNC:7568;HGNC:1717	MARCKS;CTTN;DBN1;ABI2;ACTB;ACTG1;ITSN1;MYH10;SEPTIN7	MGI:96907;MGI:99695;MGI:1931838;MGI:106913;MGI:87904;MGI:87906;MGI:1338069;MGI:1930780;MGI:1335094
GO:0099160	D12	CC	postsynaptic intermediate filament cytoskeleton	│ │ ├─ postsynaptic intermediate filament cytoskeleton	GO:0099571
GO:0098871	D13	CC	postsynaptic actin cytoskeleton	│ │ ├─ postsynaptic actin cytoskeleton	GO:0099571	0.000865792	0.00126539	HGNC:3338;HGNC:2695;HGNC:24011;HGNC:132;HGNC:144;HGNC:6183;HGNC:7568	CTTN;DBN1;ABI2;ACTB;ACTG1;ITSN1;MYH10	MGI:99695;MGI:1931838;MGI:106913;MGI:87904;MGI:87906;MGI:1338069;MGI:1930780
GO:0150050	D14	CC	postsynaptic septin cytoskeleton	│ │ ├─ postsynaptic septin cytoskeleton	GO:0099571			HGNC:1717	SEPTIN7	MGI:1335094
GO:0099189	D15	CC	postsynaptic spectrin-associated cytoskeleton	│ │ └─ postsynaptic spectrin-associated cytoskeleton	GO:0099571
GO:0097444	D4	CC	spine apparatus	│ ├─ spine apparatus	GO:0098794			HGNC:30672	SYNPO	MGI:1099446
GO:0098897	D16	CC	spine apparatus membrane	│ │ └─ spine apparatus membrane	GO:0097444
GO:0099065	D30	CC	integral component of spine apparatus membrane	│ │ └─ integral component of spine apparatus membrane	GO:0098897
GO:0150051	D5	CC	postsynaptic Golgi apparatus	│ ├─ postsynaptic Golgi apparatus	GO:0098794			HGNC:6872	MAPK10	MGI:1346863
GO:0099572	D6	CC	postsynaptic specialization	│ ├─ postsynaptic specialization	GO:0098794	4.98023e-20	3.15415e-19	HGNC:14561;HGNC:24476;HGNC:12855;HGNC:9394;HGNC:9246;HGNC:18472;HGNC:5241;HGNC:1962;HGNC:1958;HGNC:6239;HGNC:14291;HGNC:8590;HGNC:8592;HGNC:14295;HGNC:15474;HGNC:18957;HGNC:6394;HGNC:24600;HGNC:16062;HGNC:11364;HGNC:1461;HGNC:1460;HGNC:3420;HGNC:1459;HGNC:24596;HGNC:2516;HGNC:6871;HGNC:6840;HGNC:30669;HGNC:4617;HGNC:12362;HGNC:8648;HGNC:8647;HGNC:9701;HGNC:24941;HGNC:10011;HGNC:2695;HGNC:12631;HG…	ARHGEF9;DLGAP4;YWHAZ;PICK1;PPFIA2;ZDHHC5;HSPA8;CHRNB2;CHRNA4;KCND3;NLGN1;PAK1;PAK3;SHANK2;SHANK1;MAGI2;KPNA1;ANKS1B;CRTC1;STAT3;CAMK2B;CAMK2A;EPS8;CAMK1;DYNLL2;CTNND2;MAPK1;MAP2K1;SNAP47;GSK3B;TSC1;PCBP2;PCBP1;PURA;HNRNPA3;RHEB;DBN1;USP8;GRIP1;CAPZB;TSC2;RAPGEF4;DVL1;NUMB;PIP5K1C;GRK2;GRK3;AGAP3;EIF3E;CTNNA2;IQSEC1;FYN;DLG1;ABR;BCR;TANC2;SNX1;GAPDH;DNM2;SH3GL1;EXOC4;PACSIN1;DLG4;RGS7BP;CNKSR2;NPT…	MGI:2442233;MGI:2138865;MGI:109484;MGI:894645;MGI:2443834;MGI:1923573;MGI:105384;MGI:87891;MGI:87888;MGI:1928743;MGI:2179435;MGI:1339975;MGI:1339656;MGI:2671987;MGI:3613677;MGI:1354953;MGI:103560;MGI:1924781;MGI:2142523;MGI:103038;MGI:88257;MGI:88256;MGI:104684;MGI:1098535;MGI:1915347;MGI:1195966;MGI:1346858;MGI:1346866;MGI:1915076;MGI:1861437;MGI:1929183;MGI:108202;MGI:1345635;MGI:103079;MGI:191…
GO:0099091	D17	CC	postsynaptic specialization, intracellular component	│ │ ├─ postsynaptic specialization, intracellular component	GO:0099572			HGNC:18472	ZDHHC5	MGI:1923573
GO:0099634	D18	CC	postsynaptic specialization membrane	│ │ ├─ postsynaptic specialization membrane	GO:0099572	0.257621	0.264584	HGNC:5241;HGNC:1962;HGNC:1958;HGNC:6239;HGNC:14291	HSPA8;CHRNB2;CHRNA4;KCND3;NLGN1	MGI:105384;MGI:87891;MGI:87888;MGI:1928743;MGI:2179435
GO:0098892	D31	CC	extrinsic component of postsynaptic specialization membrane	│ │ │ ├─ extrinsic component of postsynaptic specialization membrane	GO:0099634
GO:0099060	D32	CC	integral component of postsynaptic specialization membrane	│ │ │ └─ integral component of postsynaptic specialization membrane	GO:0099634	0.373209	0.373209	HGNC:1962;HGNC:1958;HGNC:6239;HGNC:14291	CHRNB2;CHRNA4;KCND3;NLGN1	MGI:87891;MGI:87888;MGI:1928743;MGI:2179435
GO:0014069	D19	CC	postsynaptic density	│ │ ├─ postsynaptic density	GO:0099572	7.01166e-19	3.80633e-18	HGNC:8590;HGNC:8592;HGNC:14295;HGNC:15474;HGNC:18957;HGNC:6394;HGNC:24600;HGNC:16062;HGNC:11364;HGNC:1461;HGNC:1460;HGNC:3420;HGNC:1459;HGNC:24596;HGNC:2516;HGNC:6871;HGNC:6840;HGNC:30669;HGNC:4617;HGNC:12362;HGNC:8648;HGNC:8647;HGNC:9701;HGNC:24941;HGNC:10011;HGNC:2695;HGNC:12631;HGNC:5241;HGNC:18708;HGNC:1491;HGNC:12363;HGNC:16626;HGNC:3084;HGNC:8060;HGNC:8996;HGNC:289;HGNC:290;HGNC:16923;HGNC:…	PAK1;PAK3;SHANK2;SHANK1;MAGI2;KPNA1;ANKS1B;CRTC1;STAT3;CAMK2B;CAMK2A;EPS8;CAMK1;DYNLL2;CTNND2;MAPK1;MAP2K1;SNAP47;GSK3B;TSC1;PCBP2;PCBP1;PURA;HNRNPA3;RHEB;DBN1;USP8;HSPA8;GRIP1;CAPZB;TSC2;RAPGEF4;DVL1;NUMB;PIP5K1C;GRK2;GRK3;AGAP3;EIF3E;CTNNA2;IQSEC1;FYN;DLG1;ABR;BCR;TANC2;SNX1;GAPDH;DNM2;SH3GL1;EXOC4;PACSIN1;DLG4;RGS7BP;CNKSR2;NPTN;ATP2B2;GRM1;ADCY1;ADAM22;SCN8A;PLPPR4;GRIA2;GRIN1;DCC;RTN4;NECTIN…	MGI:1339975;MGI:1339656;MGI:2671987;MGI:3613677;MGI:1354953;MGI:103560;MGI:1924781;MGI:2142523;MGI:103038;MGI:88257;MGI:88256;MGI:104684;MGI:1098535;MGI:1915347;MGI:1195966;MGI:1346858;MGI:1346866;MGI:1915076;MGI:1861437;MGI:1929183;MGI:108202;MGI:1345635;MGI:103079;MGI:1917171;MGI:97912;MGI:1931838;MGI:1934029;MGI:105384;MGI:1921303;MGI:104652;MGI:102548;MGI:1917723;MGI:94941;MGI:107423;MGI:1298…
GO:0099092	D33	CC	postsynaptic density, intracellular component	│ │ │ ├─ postsynaptic density, intracellular component	GO:0014069	6.78387e-05	0.000112081	HGNC:2510;HGNC:29112;HGNC:24600;HGNC:4037;HGNC:2900;HGNC:81;HGNC:1014;HGNC:30212;HGNC:11172;HGNC:4141;HGNC:2974;HGNC:10830;HGNC:30389	CTNNA2;IQSEC1;ANKS1B;FYN;DLG1;ABR;BCR;TANC2;SNX1;GAPDH;DNM2;SH3GL1;EXOC4	MGI:88275;MGI:1196356;MGI:1924781;MGI:95602;MGI:107231;MGI:107771;MGI:88141;MGI:2444121;MGI:1928395;MGI:95640;MGI:109547;MGI:700010;MGI:1096376
GO:0098839	D34	CC	postsynaptic density membrane	│ │ │ └─ postsynaptic density membrane	GO:0014069	0.000208939	0.000317588	HGNC:8570;HGNC:2903;HGNC:23271;HGNC:19701;HGNC:17867;HGNC:815;HGNC:4593;HGNC:232;HGNC:201;HGNC:10596;HGNC:23496;HGNC:4572;HGNC:4584;HGNC:2701;HGNC:14085;HGNC:17664;HGNC:4573;HGNC:12669;HGNC:6229;HGNC:11433	PACSIN1;DLG4;RGS7BP;CNKSR2;NPTN;ATP2B2;GRM1;ADCY1;ADAM22;SCN8A;PLPPR4;GRIA2;GRIN1;DCC;RTN4;NECTIN3;GRIA3;VDAC1;KCNAB2;STX1A	MGI:1345181;MGI:1277959;MGI:106334;MGI:2661175;MGI:108077;MGI:105368;MGI:1351338;MGI:99677;MGI:1340046;MGI:103169;MGI:106530;MGI:95809;MGI:95819;MGI:94869;MGI:1915835;MGI:1930171;MGI:95810;MGI:106919;MGI:109239;MGI:109355
GO:0099031	D40	CC	anchored component of postsynaptic density membrane	│ │ │ ├─ anchored component of postsynaptic density membrane	GO:0098839			HGNC:2903;HGNC:23271	DLG4;RGS7BP	MGI:1277959;MGI:106334
GO:0099147	D41	CC	extrinsic component of postsynaptic density membrane	│ │ │ ├─ extrinsic component of postsynaptic density membrane	GO:0098839			HGNC:19701	CNKSR2	MGI:2661175
GO:0099061	D42	CC	integral component of postsynaptic density membrane	│ │ │ └─ integral component of postsynaptic density membrane	GO:0098839	0.000995018	0.0014004	HGNC:17867;HGNC:815;HGNC:4593;HGNC:232;HGNC:201;HGNC:10596;HGNC:23496;HGNC:4572;HGNC:4584;HGNC:2701;HGNC:14085;HGNC:17664;HGNC:4573;HGNC:12669;HGNC:6229;HGNC:11433	NPTN;ATP2B2;GRM1;ADCY1;ADAM22;SCN8A;PLPPR4;GRIA2;GRIN1;DCC;RTN4;NECTIN3;GRIA3;VDAC1;KCNAB2;STX1A	MGI:108077;MGI:105368;MGI:1351338;MGI:99677;MGI:1340046;MGI:103169;MGI:106530;MGI:95809;MGI:95819;MGI:94869;MGI:1915835;MGI:1930171;MGI:95810;MGI:106919;MGI:109239;MGI:109355
GO:0099629	D20	CC	postsynaptic specialization of symmetric synapse	│ │ └─ postsynaptic specialization of symmetric synapse	GO:0099572			HGNC:25589	SEPTIN11	MGI:1277214
GO:0098843	D7	CC	postsynaptic endocytic zone	│ ├─ postsynaptic endocytic zone	GO:0098794	0.00122058	0.0016565	HGNC:10834;HGNC:2090;HGNC:9394;HGNC:9783;HGNC:29125	SH3GLB2;CLTA;PICK1;RAB5A;DNM3	MGI:2385131;MGI:894297;MGI:894645;MGI:105926;MGI:1341299
GO:0098844	D21	CC	postsynaptic endocytic zone membrane	│ │ └─ postsynaptic endocytic zone membrane	GO:0098843			HGNC:9783;HGNC:29125	RAB5A;DNM3	MGI:105926;MGI:1341299
GO:0098845	D8	CC	postsynaptic endosome	│ ├─ postsynaptic endosome	GO:0098794			HGNC:11172;HGNC:18706	SNX1;GRIPAP1	MGI:1928395;MGI:1859616
GO:0098895	D22	CC	postsynaptic endosome membrane	│ │ ├─ postsynaptic endosome membrane	GO:0098845			HGNC:11172	SNX1	MGI:1928395
GO:0098999	D35	CC	extrinsic component of postsynaptic endosome membrane	│ │ │ └─ extrinsic component of postsynaptic endosome membrane	GO:0098895			HGNC:11172	SNX1	MGI:1928395
GO:0098842	D23	CC	postsynaptic early endosome	│ │ ├─ postsynaptic early endosome	GO:0098845			HGNC:18706	GRIPAP1	MGI:1859616
GO:0098896	D36	CC	postsynaptic early endosome membrane	│ │ │ └─ postsynaptic early endosome membrane	GO:0098842			HGNC:18706	GRIPAP1	MGI:1859616
GO:0098998	D43	CC	extrinsic component of postsynaptic early endosome membrane	│ │ │ └─ extrinsic component of postsynaptic early endosome membrane	GO:0098896			HGNC:18706	GRIPAP1	MGI:1859616
GO:0098837	D24	CC	postsynaptic recycling endosome	│ │ └─ postsynaptic recycling endosome	GO:0098845
GO:0098944	D37	CC	postsynaptic recycling endosome membrane	│ │ └─ postsynaptic recycling endosome membrane	GO:0098837
GO:0099033	D44	CC	anchored component of postsynaptic recycling endosome membrane	│ │ └─ anchored component of postsynaptic recycling endosome membrane	GO:0098944
GO:0045211	D9	CC	postsynaptic membrane	│ ├─ postsynaptic membrane	GO:0098794	1.00508e-06	2.12183e-06	HGNC:2695;HGNC:14986;HGNC:10003;HGNC:1399;HGNC:6759;HGNC:2172;HGNC:18957;HGNC:2510;HGNC:13581;HGNC:7648;HGNC:6222;HGNC:815;HGNC:6220;HGNC:4597;HGNC:5951;HGNC:3388;HGNC:1392;HGNC:11042;HGNC:11049;HGNC:11068;HGNC:11069;HGNC:4572;HGNC:4573;HGNC:4593;HGNC:4507;HGNC:6139;HGNC:10939	DBN1;SNAP91;RGS7;CACNA2D1;MARCKS;CNTN2;MAGI2;CTNNA2;FBXO2;NBEA;KCNA4;ATP2B2;KCNA2;GRM5;CADM1;EPHA4;CACNA1E;SLC6A1;SLC6A3;SLC8A1;SLC8A2;GRIA2;GRIA3;GRM1;GABBR2;ITGA3;SLC1A1	MGI:1931838;MGI:109132;MGI:1346089;MGI:88295;MGI:96907;MGI:104518;MGI:1354953;MGI:88275;MGI:2446216;MGI:1347075;MGI:96661;MGI:105368;MGI:96659;MGI:1351342;MGI:1889272;MGI:98277;MGI:106217;MGI:95627;MGI:94862;MGI:107956;MGI:107996;MGI:95809;MGI:95810;MGI:1351338;MGI:2386030;MGI:96602;MGI:105083
GO:0099025	D25	CC	anchored component of postsynaptic membrane	│ │ ├─ anchored component of postsynaptic membrane	GO:0045211	0.00551131	0.0067558	HGNC:1399;HGNC:6759;HGNC:2172	CACNA2D1;MARCKS;CNTN2	MGI:88295;MGI:96907;MGI:104518
GO:0098890	D26	CC	extrinsic component of postsynaptic membrane	│ │ ├─ extrinsic component of postsynaptic membrane	GO:0045211	0.00493065	0.00624549	HGNC:18957;HGNC:2510;HGNC:13581;HGNC:7648	MAGI2;CTNNA2;FBXO2;NBEA	MGI:1354953;MGI:88275;MGI:2446216;MGI:1347075
GO:0099055	D27	CC	integral component of postsynaptic membrane	│ │ └─ integral component of postsynaptic membrane	GO:0045211	0.00196157	0.00257033	HGNC:6222;HGNC:815;HGNC:6220;HGNC:4597;HGNC:5951;HGNC:3388;HGNC:1392;HGNC:11042;HGNC:11049;HGNC:11068;HGNC:11069;HGNC:4572;HGNC:4573;HGNC:4593;HGNC:4507;HGNC:6139;HGNC:10939	KCNA4;ATP2B2;KCNA2;GRM5;CADM1;EPHA4;CACNA1E;SLC6A1;SLC6A3;SLC8A1;SLC8A2;GRIA2;GRIA3;GRM1;GABBR2;ITGA3;SLC1A1	MGI:96661;MGI:105368;MGI:96659;MGI:1351342;MGI:1889272;MGI:98277;MGI:106217;MGI:95627;MGI:94862;MGI:107956;MGI:107996;MGI:95809;MGI:95810;MGI:1351338;MGI:2386030;MGI:96602;MGI:105083
SYNGO:postsyn_ribosome	D10	CC	postsynaptic ribosome	│ ├─ postsynaptic ribosome	GO:0098794
SYNGO:postsyn_er	D11	CC	postsynaptic ER	│ └─ postsynaptic ER	GO:0098794
SYNGO:postsyn_er_membrane	D28	CC	postsynaptic ER membrane	│ ├─ postsynaptic ER membrane	SYNGO:postsyn_er
SYNGO:postsyn_er_membrane_integral	D38	CC	integral component of postsynaptic ER membrane	│ │ └─ integral component of postsynaptic ER membrane	SYNGO:postsyn_er_membrane
SYNGO:postsyn_ser	D29	CC	postsynaptic SER	│ └─ postsynaptic SER	SYNGO:postsyn_er
SYNGO:postsyn_ser_membrane	D39	CC	postsynaptic SER membrane	│ └─ postsynaptic SER membrane	SYNGO:postsyn_ser
SYNGO:postsyn_ser_membrane_integral	D45	CC	integral component of postsynaptic SER membrane	│ └─ integral component of postsynaptic SER membrane	SYNGO:postsyn_ser_membrane
GO:0099544	E1	CC	extrasynaptic space	└─ extrasynaptic space	GO:0045202
GO:0098966	E2	CC	perisynaptic extracellular matrix	└─ perisynaptic extracellular matrix	GO:0099544
SYNGO:synprocess		BP	process in the synapse	process in the synapse		5.09402e-87	4.22803e-85	HGNC:1774;HGNC:17072;HGNC:3953;HGNC:16874;HGNC:31922;HGNC:1434;HGNC:1435;HGNC:1388;HGNC:1389;HGNC:1392;HGNC:1402;HGNC:1404;HGNC:30339;HGNC:4572;HGNC:4573;HGNC:4584;HGNC:6284;HGNC:6222;HGNC:6220;HGNC:6267;HGNC:10588;HGNC:10585;HGNC:661;HGNC:24539;HGNC:8016;HGNC:11494;HGNC:1117;HGNC:16235;HGNC:9390;HGNC:8008;HGNC:11498;HGNC:11501;HGNC:11133;HGNC:9778;HGNC:9091;HGNC:16626;HGNC:9317;HGNC:22192;HGNC:1…	CDK5;ERC1;NCS1;SV2B;ERC2;CALB1;CALB2;CACNA1A;CACNA1B;CACNA1E;CACNB2;CACNB4;RIMBP2;GRIA2;GRIA3;GRIN1;KCNMA1;KCNA4;KCNA2;KCNJ6;SCN2A;SCN1A;ARFGAP3;NECAP1;NSF;SYN1;BSN;DNAJC5;PRKAR1B;NRXN1;SYNGR1;SYNGR3;SNAP29;RAB3B;PLS3;RAPGEF4;PPP3R1;SCRN1;PCLO;ABI2;CTBP1;RAB35;TBC1D24;AP3D1;AP1G1;SNAP25;VAMP2;STX1A;STX1B;PPFIA3;SYT7;SYT1;PRRT2;RIMS1;SNAPIN;PRKCA;PRKCB;PPFIA2;SYP;SV2C;STXBP5L;GIT1;DVL1;TPRG1L;CAMK…	MGI:101765;MGI:2151013;MGI:109166;MGI:1927338;MGI:1098749;MGI:88248;MGI:101914;MGI:109482;MGI:88296;MGI:106217;MGI:894644;MGI:103301;MGI:2443235;MGI:95809;MGI:95810;MGI:95819;MGI:99923;MGI:96661;MGI:96659;MGI:104781;MGI:98248;MGI:98246;MGI:1913501;MGI:1914852;MGI:104560;MGI:98460;MGI:1277955;MGI:892995;MGI:97759;MGI:1096391;MGI:1328323;MGI:1341881;MGI:1914724;MGI:1917158;MGI:104807;MGI:1917723;MG…
SYNGO:presynprocess	F1	BP	process in the presynapse	├─ process in the presynapse	SYNGO:synprocess	6.76744e-50	2.80849e-48	HGNC:1774;HGNC:17072;HGNC:3953;HGNC:16874;HGNC:31922;HGNC:1434;HGNC:1435;HGNC:1388;HGNC:1389;HGNC:1392;HGNC:1402;HGNC:1404;HGNC:30339;HGNC:4572;HGNC:4573;HGNC:4584;HGNC:6284;HGNC:6222;HGNC:6220;HGNC:6267;HGNC:10588;HGNC:10585;HGNC:661;HGNC:24539;HGNC:8016;HGNC:11494;HGNC:1117;HGNC:16235;HGNC:9390;HGNC:8008;HGNC:11498;HGNC:11501;HGNC:11133;HGNC:9778;HGNC:9091;HGNC:16626;HGNC:9317;HGNC:22192;HGNC:1…	CDK5;ERC1;NCS1;SV2B;ERC2;CALB1;CALB2;CACNA1A;CACNA1B;CACNA1E;CACNB2;CACNB4;RIMBP2;GRIA2;GRIA3;GRIN1;KCNMA1;KCNA4;KCNA2;KCNJ6;SCN2A;SCN1A;ARFGAP3;NECAP1;NSF;SYN1;BSN;DNAJC5;PRKAR1B;NRXN1;SYNGR1;SYNGR3;SNAP29;RAB3B;PLS3;RAPGEF4;PPP3R1;SCRN1;PCLO;ABI2;CTBP1;RAB35;TBC1D24;AP3D1;AP1G1;SNAP25;VAMP2;STX1A;STX1B;PPFIA3;SYT7;SYT1;PRRT2;RIMS1;SNAPIN;PRKCA;PRKCB;PPFIA2;SYP;SV2C;STXBP5L;GIT1;DVL1;TPRG1L;CAMK…	MGI:101765;MGI:2151013;MGI:109166;MGI:1927338;MGI:1098749;MGI:88248;MGI:101914;MGI:109482;MGI:88296;MGI:106217;MGI:894644;MGI:103301;MGI:2443235;MGI:95809;MGI:95810;MGI:95819;MGI:99923;MGI:96661;MGI:96659;MGI:104781;MGI:98248;MGI:98246;MGI:1913501;MGI:1914852;MGI:104560;MGI:98460;MGI:1277955;MGI:892995;MGI:97759;MGI:1096391;MGI:1328323;MGI:1341881;MGI:1914724;MGI:1917158;MGI:104807;MGI:1917723;MG…
GO:0099509	F2	BP	regulation of presynaptic cytosolic calcium levels	│ ├─ regulation of presynaptic cytosolic calcium levels	SYNGO:presynprocess	2.02967e-06	8.02202e-06	HGNC:1774;HGNC:17072;HGNC:3953;HGNC:16874;HGNC:31922;HGNC:1434;HGNC:1435;HGNC:1388;HGNC:1389;HGNC:1392;HGNC:1402;HGNC:1404;HGNC:30339	CDK5;ERC1;NCS1;SV2B;ERC2;CALB1;CALB2;CACNA1A;CACNA1B;CACNA1E;CACNB2;CACNB4;RIMBP2	MGI:101765;MGI:2151013;MGI:109166;MGI:1927338;MGI:1098749;MGI:88248;MGI:101914;MGI:109482;MGI:88296;MGI:106217;MGI:894644;MGI:103301;MGI:2443235
GO:1905056	F11	BP	ATPase-coupled calcium ion transmembrane transporter activity involved in regulation of presynaptic cytosolic calcium levels	│ │ ├─ ATPase-coupled calcium ion transmembrane transporter activity involved in regulation of presynaptic cytosolic calcium levels	GO:0099509
GO:0099534	F12	BP	calcium ion binding involved in regulation of presynaptic cytosolic calcium levels	│ │ ├─ calcium ion binding involved in regulation of presynaptic cytosolic calcium levels	GO:0099509			HGNC:1434;HGNC:1435	CALB1;CALB2	MGI:88248;MGI:101914
GO:0099626	F13	BP	voltage-gated calcium channel activity involved in regulation of presynaptic cytosolic calcium levels	│ │ └─ voltage-gated calcium channel activity involved in regulation of presynaptic cytosolic calcium levels	GO:0099509	0.000301518	0.000658578	HGNC:1388;HGNC:1389;HGNC:1392;HGNC:1402;HGNC:1404;HGNC:30339	CACNA1A;CACNA1B;CACNA1E;CACNB2;CACNB4;RIMBP2	MGI:109482;MGI:88296;MGI:106217;MGI:894644;MGI:103301;MGI:2443235
GO:0099505	F3	BP	regulation of presynaptic membrane potential	│ ├─ regulation of presynaptic membrane potential	SYNGO:presynprocess	0.00334341	0.0053366	HGNC:30339;HGNC:4572;HGNC:4573;HGNC:4584;HGNC:6284;HGNC:6222;HGNC:6220;HGNC:6267;HGNC:10588;HGNC:10585	RIMBP2;GRIA2;GRIA3;GRIN1;KCNMA1;KCNA4;KCNA2;KCNJ6;SCN2A;SCN1A	MGI:2443235;MGI:95809;MGI:95810;MGI:95819;MGI:99923;MGI:96661;MGI:96659;MGI:104781;MGI:98248;MGI:98246
GO:0099507	F14	BP	ligand-gated ion channel activity involved in regulation of presynaptic membrane potential	│ │ ├─ ligand-gated ion channel activity involved in regulation of presynaptic membrane potential	GO:0099505	0.122073	0.125087	HGNC:4572;HGNC:4573;HGNC:4584;HGNC:6284	GRIA2;GRIA3;GRIN1;KCNMA1	MGI:95809;MGI:95810;MGI:95819;MGI:99923
GO:0099508	F15	BP	voltage-gated ion channel activity involved in regulation of presynaptic membrane potential	│ │ ├─ voltage-gated ion channel activity involved in regulation of presynaptic membrane potential	GO:0099505	0.00378356	0.00570974	HGNC:6222;HGNC:6220;HGNC:6267;HGNC:10588;HGNC:10585;HGNC:30339	KCNA4;KCNA2;KCNJ6;SCN2A;SCN1A;RIMBP2	MGI:96661;MGI:96659;MGI:104781;MGI:98248;MGI:98246;MGI:2443235
GO:0150047	F16	BP	G protein-coupled neurotransmitter receptor activity involved in regulation of presynaptic membrane potential	│ │ ├─ G protein-coupled neurotransmitter receptor activity involved in regulation of presynaptic membrane potential	GO:0099505
GO:0140232	F17	BP	intracellular cAMP-activated cation channel activity involved in regulation of presynaptic membrane potential	│ │ └─ intracellular cAMP-activated cation channel activity involved in regulation of presynaptic membrane potential	GO:0099505
GO:0140238	F4	BP	presynaptic endocytosis	│ ├─ presynaptic endocytosis	SYNGO:presynprocess			HGNC:661;HGNC:24539	ARFGAP3;NECAP1	MGI:1913501;MGI:1914852
GO:0099504	F5	BP	synaptic vesicle cycle	│ ├─ synaptic vesicle cycle	SYNGO:presynprocess	7.88127e-46	2.18048e-44	HGNC:8016;HGNC:11494;HGNC:1117;HGNC:16235;HGNC:9390;HGNC:8008;HGNC:11498;HGNC:11501;HGNC:11133;HGNC:9778;HGNC:9091;HGNC:16626;HGNC:9317;HGNC:22192;HGNC:13406;HGNC:24011;HGNC:2494;HGNC:9774;HGNC:29203;HGNC:568;HGNC:555;HGNC:11132;HGNC:12643;HGNC:11433;HGNC:18539;HGNC:9247;HGNC:11514;HGNC:11509;HGNC:30500;HGNC:17282;HGNC:30339;HGNC:1389;HGNC:17072;HGNC:31922;HGNC:17145;HGNC:9393;HGNC:9395;HGNC:3953…	NSF;SYN1;BSN;DNAJC5;PRKAR1B;NRXN1;SYNGR1;SYNGR3;SNAP29;RAB3B;PLS3;RAPGEF4;PPP3R1;SCRN1;PCLO;ABI2;CTBP1;RAB35;TBC1D24;AP3D1;AP1G1;SNAP25;VAMP2;STX1A;STX1B;PPFIA3;SYT7;SYT1;PRRT2;RIMS1;RIMBP2;CACNA1B;ERC1;ERC2;SNAPIN;PRKCA;PRKCB;NCS1;PPFIA2;SYP;SV2C;STXBP5L;GIT1;CACNA1E;CACNB4;DVL1;SV2B;TPRG1L;CAMK2A;SEPTIN5;RAB3A;CPLX1;CPLX2;NAPA;STXBP1;SV2A;CADPS;CADPS2;RPH3A;NAPB;SLC18A2;SLC10A4;GAPDH;ATP6V1A;AT…	MGI:104560;MGI:98460;MGI:1277955;MGI:892995;MGI:97759;MGI:1096391;MGI:1328323;MGI:1341881;MGI:1914724;MGI:1917158;MGI:104807;MGI:1917723;MGI:107172;MGI:1917188;MGI:1349390;MGI:106913;MGI:1201685;MGI:1924657;MGI:2443456;MGI:107734;MGI:101919;MGI:98331;MGI:1313277;MGI:109355;MGI:1930705;MGI:1924037;MGI:1859545;MGI:99667;MGI:1916267;MGI:2152971;MGI:2443235;MGI:88296;MGI:2151013;MGI:1098749;MGI:13337…
GO:0098693	F18	BP	regulation of synaptic vesicle cycle	│ │ ├─ regulation of synaptic vesicle cycle	GO:0099504	5.31481e-07	2.45072e-06	HGNC:1117;HGNC:16235;HGNC:11494;HGNC:9390;HGNC:8008;HGNC:11498;HGNC:11501;HGNC:11133;HGNC:9778;HGNC:9091;HGNC:16626;HGNC:9317;HGNC:22192	BSN;DNAJC5;SYN1;PRKAR1B;NRXN1;SYNGR1;SYNGR3;SNAP29;RAB3B;PLS3;RAPGEF4;PPP3R1;SCRN1	MGI:1277955;MGI:892995;MGI:98460;MGI:97759;MGI:1096391;MGI:1328323;MGI:1341881;MGI:1914724;MGI:1917158;MGI:104807;MGI:1917723;MGI:107172;MGI:1917188
GO:0097091	F19	BP	synaptic vesicle clustering	│ │ ├─ synaptic vesicle clustering	GO:0099504	0.0126753	0.0164382	HGNC:13406;HGNC:24011;HGNC:1117;HGNC:2494	PCLO;ABI2;BSN;CTBP1	MGI:1349390;MGI:106913;MGI:1277955;MGI:1201685
GO:0099532	F20	BP	synaptic vesicle endosomal processing	│ │ ├─ synaptic vesicle endosomal processing	GO:0099504	0.0126753	0.0164382	HGNC:9774;HGNC:29203;HGNC:568;HGNC:555	RAB35;TBC1D24;AP3D1;AP1G1	MGI:1924657;MGI:2443456;MGI:107734;MGI:101919
GO:0016182	F29	BP	synaptic vesicle budding from endosome	│ │ │ ├─ synaptic vesicle budding from endosome	GO:0099532			HGNC:568;HGNC:555	AP3D1;AP1G1	MGI:107734;MGI:101919
GO:0016189	F30	BP	synaptic vesicle to endosome fusion	│ │ │ └─ synaptic vesicle to endosome fusion	GO:0099532
GO:0016079	F21	BP	synaptic vesicle exocytosis	│ │ ├─ synaptic vesicle exocytosis	GO:0099504	7.48176e-19	1.03498e-17	HGNC:11132;HGNC:12643;HGNC:11433;HGNC:18539;HGNC:9247;HGNC:11514;HGNC:11509;HGNC:30500;HGNC:17282;HGNC:30339;HGNC:1389;HGNC:17072;HGNC:31922;HGNC:17145;HGNC:9393;HGNC:9395;HGNC:3953;HGNC:9246;HGNC:11506;HGNC:30670;HGNC:30757;HGNC:4272;HGNC:1392;HGNC:1404;HGNC:3084;HGNC:16874;HGNC:11133;HGNC:27007;HGNC:1460;HGNC:9164;HGNC:9777;HGNC:2309;HGNC:2310;HGNC:7641;HGNC:11444;HGNC:20566;HGNC:1426;HGNC:1601…	SNAP25;VAMP2;STX1A;STX1B;PPFIA3;SYT7;SYT1;PRRT2;RIMS1;RIMBP2;CACNA1B;ERC1;ERC2;SNAPIN;PRKCA;PRKCB;NCS1;PPFIA2;SYP;SV2C;STXBP5L;GIT1;CACNA1E;CACNB4;DVL1;SV2B;SNAP29;TPRG1L;CAMK2A;SEPTIN5;RAB3A;CPLX1;CPLX2;NAPA;STXBP1;SV2A;CADPS;CADPS2;RPH3A;NAPB	MGI:98331;MGI:1313277;MGI:109355;MGI:1930705;MGI:1924037;MGI:1859545;MGI:99667;MGI:1916267;MGI:2152971;MGI:2443235;MGI:88296;MGI:2151013;MGI:1098749;MGI:1333745;MGI:97595;MGI:97596;MGI:109166;MGI:2443834;MGI:98467;MGI:1922459;MGI:2443815;MGI:1927140;MGI:106217;MGI:103301;MGI:94941;MGI:1927338;MGI:1914724;MGI:1915058;MGI:88256;MGI:1195461;MGI:97843;MGI:104727;MGI:104726;MGI:104563;MGI:107363;MGI:1…
GO:0099502	F31	BP	calcium-dependent activation of synaptic vesicle fusion	│ │ │ ├─ calcium-dependent activation of synaptic vesicle fusion	GO:0016079	4.37167e-05	0.00012512	HGNC:11514;HGNC:11509;HGNC:30500;HGNC:17282;HGNC:30339;HGNC:1389;HGNC:17072;HGNC:31922	SYT7;SYT1;PRRT2;RIMS1;RIMBP2;CACNA1B;ERC1;ERC2	MGI:1859545;MGI:99667;MGI:1916267;MGI:2152971;MGI:2443235;MGI:88296;MGI:2151013;MGI:1098749
GO:0150037	F41	BP	regulation of calcium-dependent activation of synaptic vesicle fusion	│ │ │ │ └─ regulation of calcium-dependent activation of synaptic vesicle fusion	GO:0099502	0.000116502	0.000322321	HGNC:30500;HGNC:17282;HGNC:30339;HGNC:1389;HGNC:17072;HGNC:31922	PRRT2;RIMS1;RIMBP2;CACNA1B;ERC1;ERC2	MGI:1916267;MGI:2152971;MGI:2443235;MGI:88296;MGI:2151013;MGI:1098749
GO:2000300	F32	BP	regulation of synaptic vesicle exocytosis	│ │ │ ├─ regulation of synaptic vesicle exocytosis	GO:0016079	7.45631e-07	3.25723e-06	HGNC:17145;HGNC:9393;HGNC:9395;HGNC:3953;HGNC:9246;HGNC:11506;HGNC:30670;HGNC:30757;HGNC:4272;HGNC:1392;HGNC:1404;HGNC:3084;HGNC:16874;HGNC:11133;HGNC:27007	SNAPIN;PRKCA;PRKCB;NCS1;PPFIA2;SYP;SV2C;STXBP5L;GIT1;CACNA1E;CACNB4;DVL1;SV2B;SNAP29;TPRG1L	MGI:1333745;MGI:97595;MGI:97596;MGI:109166;MGI:2443834;MGI:98467;MGI:1922459;MGI:2443815;MGI:1927140;MGI:106217;MGI:103301;MGI:94941;MGI:1927338;MGI:1914724;MGI:1915058
GO:0016081	F33	BP	synaptic vesicle docking	│ │ │ ├─ synaptic vesicle docking	GO:0016079	0.00122058	0.00213683	HGNC:17282;HGNC:12643;HGNC:9247;HGNC:1460;HGNC:9164	RIMS1;VAMP2;PPFIA3;CAMK2A;SEPTIN5	MGI:2152971;MGI:1313277;MGI:1924037;MGI:88256;MGI:1195461
GO:0099148	F42	BP	regulation of synaptic vesicle docking	│ │ │ │ └─ regulation of synaptic vesicle docking	GO:0016081			HGNC:1460;HGNC:9164	CAMK2A;SEPTIN5	MGI:88256;MGI:1195461
GO:0031629	F34	BP	synaptic vesicle fusion to presynaptic active zone membrane	│ │ │ ├─ synaptic vesicle fusion to presynaptic active zone membrane	GO:0016079	0.000192043	0.000455416	HGNC:18539;HGNC:9777;HGNC:2309;HGNC:2310;HGNC:17072;HGNC:31922	STX1B;RAB3A;CPLX1;CPLX2;ERC1;ERC2	MGI:1930705;MGI:97843;MGI:104727;MGI:104726;MGI:2151013;MGI:1098749
GO:0031630	F43	BP	regulation of synaptic vesicle fusion to presynaptic active zone membrane	│ │ │ │ └─ regulation of synaptic vesicle fusion to presynaptic active zone membrane	GO:0031629	0.000795935	0.00157292	HGNC:9777;HGNC:2309;HGNC:2310;HGNC:17072;HGNC:31922	RAB3A;CPLX1;CPLX2;ERC1;ERC2	MGI:97843;MGI:104727;MGI:104726;MGI:2151013;MGI:1098749
GO:0016082	F35	BP	synaptic vesicle priming	│ │ │ └─ synaptic vesicle priming	GO:0016079	1.12226e-06	4.65736e-06	HGNC:7641;HGNC:17282;HGNC:11444;HGNC:20566;HGNC:17072;HGNC:31922;HGNC:1426;HGNC:16018;HGNC:17056;HGNC:15751	NAPA;RIMS1;STXBP1;SV2A;ERC1;ERC2;CADPS;CADPS2;RPH3A;NAPB	MGI:104563;MGI:2152971;MGI:107363;MGI:1927139;MGI:2151013;MGI:1098749;MGI:1350922;MGI:2443963;MGI:102788;MGI:104562
GO:0010807	F44	BP	regulation of synaptic vesicle priming	│ │ │ └─ regulation of synaptic vesicle priming	GO:0016082			HGNC:7641;HGNC:15751	NAPA;NAPB	MGI:104563;MGI:104562
GO:0098700	F22	BP	synaptic vesicle neurotransmitter loading	│ │ ├─ synaptic vesicle neurotransmitter loading	GO:0099504	0.0351038	0.0388482	HGNC:10935;HGNC:22980;HGNC:4141	SLC18A2;SLC10A4;GAPDH	MGI:106677;MGI:3606480;MGI:95640
GO:0099162	F36	BP	regulation of synaptic vesicle neurotransmitter loading	│ │ │ └─ regulation of synaptic vesicle neurotransmitter loading	GO:0098700			HGNC:22980;HGNC:4141	SLC10A4;GAPDH	MGI:3606480;MGI:95640
GO:0099180	F23	BP	zinc ion import into synaptic vesicle	│ │ ├─ zinc ion import into synaptic vesicle	GO:0099504
GO:0097401	F24	BP	synaptic vesicle proton loading	│ │ ├─ synaptic vesicle proton loading	GO:0099504	9.37473e-06	3.38306e-05	HGNC:851;HGNC:854;HGNC:13527;HGNC:857;HGNC:16832;HGNC:13724;HGNC:862;HGNC:865;HGNC:18303;HGNC:2938	ATP6V1A;ATP6V1B2;ATP6V1D;ATP6V1E1;ATP6V1F;ATP6V0D1;ATP6V1G2;ATP6V0A1;ATP6V1H;DMXL2	MGI:1201780;MGI:109618;MGI:1921084;MGI:894326;MGI:1913394;MGI:1201778;MGI:1913487;MGI:103286;MGI:1914864;MGI:2444630
GO:1901546	F37	BP	regulation of proton loading	│ │ │ └─ regulation of proton loading	GO:0097401			HGNC:2938	DMXL2	MGI:2444630
GO:0048488	F25	BP	synaptic vesicle endocytosis	│ │ └─ synaptic vesicle endocytosis	GO:0099504	1.95804e-16	2.32167e-15	HGNC:9767;HGNC:659;HGNC:2092;HGNC:10831;HGNC:2972;HGNC:29125;HGNC:14986;HGNC:15514;HGNC:471;HGNC:8570;HGNC:564;HGNC:9783;HGNC:21604;HGNC:6183;HGNC:3242;HGNC:2974;HGNC:1052;HGNC:2973;HGNC:555;HGNC:11138;HGNC:11140;HGNC:563;HGNC:2494;HGNC:132;HGNC:8996;HGNC:144;HGNC:11514;HGNC:9315;HGNC:2856;HGNC:11503;HGNC:5241;HGNC:15469	RAB27B;ARF6;CLTC;SH3GL2;DNM1;DNM3;SNAP91;PICALM;AMPH;PACSIN1;AP2M1;RAB5A;EPN1;ITSN1;EHD1;DNM2;BIN1;DNM1L;AP1G1;SNCA;SNCB;AP2B1;CTBP1;ACTB;PIP5K1C;ACTG1;SYT7;PPP3CB;DGKQ;SYNJ1;HSPA8;DNAJC6	MGI:1931295;MGI:99435;MGI:2388633;MGI:700009;MGI:107384;MGI:1341299;MGI:109132;MGI:2385902;MGI:103574;MGI:1345181;MGI:1298405;MGI:105926;MGI:1333763;MGI:1338069;MGI:1341878;MGI:109547;MGI:108092;MGI:1921256;MGI:101919;MGI:1277151;MGI:1889011;MGI:1919020;MGI:1201685;MGI:87904;MGI:1298224;MGI:87906;MGI:1859545;MGI:107163;MGI:102918;MGI:1354961;MGI:105384;MGI:1919935
GO:1900242	F38	BP	regulation of synaptic vesicle endocytosis	│ │ ├─ regulation of synaptic vesicle endocytosis	GO:0048488	0.00378356	0.00570974	HGNC:132;HGNC:8996;HGNC:144;HGNC:11514;HGNC:9315;HGNC:2856	ACTB;PIP5K1C;ACTG1;SYT7;PPP3CB;DGKQ	MGI:87904;MGI:1298224;MGI:87906;MGI:1859545;MGI:107163;MGI:102918
GO:0016185	F39	BP	synaptic vesicle budding from presynaptic endocytic zone membrane	│ │ ├─ synaptic vesicle budding from presynaptic endocytic zone membrane	GO:0048488
GO:0098694	F45	BP	regulation of synaptic vesicle budding from presynaptic endocytic zone membrane	│ │ │ └─ regulation of synaptic vesicle budding from presynaptic endocytic zone membrane	GO:0016185
GO:0016191	F40	BP	synaptic vesicle uncoating	│ │ └─ synaptic vesicle uncoating	GO:0048488	0.00551131	0.00802524	HGNC:11503;HGNC:5241;HGNC:15469	SYNJ1;HSPA8;DNAJC6	MGI:1354961;MGI:105384;MGI:1919935
GO:0099525	F6	BP	presynaptic dense core vesicle exocytosis	│ ├─ presynaptic dense core vesicle exocytosis	SYNGO:presynprocess	2.47018e-06	9.31933e-06	HGNC:1426;HGNC:17282;HGNC:11132;HGNC:29125;HGNC:2972;HGNC:2974;HGNC:9784;HGNC:11444;HGNC:9777;HGNC:14406;HGNC:9401	CADPS;RIMS1;SNAP25;DNM3;DNM1;DNM2;RAB5B;STXBP1;RAB3A;PTPN23;PRKCE	MGI:1350922;MGI:2152971;MGI:98331;MGI:1341299;MGI:107384;MGI:109547;MGI:105938;MGI:107363;MGI:97843;MGI:2144837;MGI:97599
GO:0099161	F26	BP	regulation of presynaptic dense core vesicle exocytosis	│ │ └─ regulation of presynaptic dense core vesicle exocytosis	GO:0099525	0.0444724	0.0479378	HGNC:9777;HGNC:14406;HGNC:9401	RAB3A;PTPN23;PRKCE	MGI:97843;MGI:2144837;MGI:97599
GO:0001504	F7	BP	neurotransmitter uptake	│ ├─ neurotransmitter uptake	SYNGO:presynprocess			HGNC:11049	SLC6A3	MGI:94862
GO:0098810	F8	BP	neurotransmitter reuptake	│ ├─ neurotransmitter reuptake	SYNGO:presynprocess			HGNC:11042;HGNC:11501	SLC6A1;SYNGR3	MGI:95627;MGI:1341881
GO:0051580	F27	BP	regulation of neurotransmitter uptake	│ │ └─ regulation of neurotransmitter uptake	GO:0098810			HGNC:11501	SYNGR3	MGI:1341881
SYNGO:presyn_chaperoneProteinFolding	F9	BP	presynaptic chaperone-mediated protein folding	│ ├─ presynaptic chaperone-mediated protein folding	SYNGO:presynprocess	0.00551131	0.00802524	HGNC:10819;HGNC:16235;HGNC:5241	SGTA;DNAJC5;HSPA8	MGI:1098703;MGI:892995;MGI:105384
GO:0098928	F10	BP	presynaptic signaling pathway	│ └─ presynaptic signaling pathway	SYNGO:presynprocess			HGNC:2494	CTBP1	MGI:1201685
GO:0099526	F28	BP	presynapse to nucleus signaling pathway	│ └─ presynapse to nucleus signaling pathway	GO:0098928			HGNC:2494	CTBP1	MGI:1201685
SYNGO:postsynprocess	G1	BP	process in the postsynapse	├─ process in the postsynapse	SYNGO:synprocess	5.25532e-20	8.72383e-19	HGNC:30672;HGNC:815;HGNC:1434;HGNC:11068;HGNC:11069;HGNC:4593;HGNC:10003;HGNC:23271;HGNC:4584;HGNC:1962;HGNC:1958;HGNC:4572;HGNC:4573;HGNC:6220;HGNC:24163;HGNC:8009;HGNC:3758;HGNC:8010;HGNC:3420;HGNC:12851;HGNC:2516;HGNC:18472;HGNC:16923;HGNC:9861;HGNC:9841;HGNC:20073;HGNC:14970;HGNC:5253;HGNC:13830;HGNC:201;HGNC:4272;HGNC:2900;HGNC:2903;HGNC:6840;HGNC:18957;HGNC:4617;HGNC:1460;HGNC:8590;HGNC:859…	SYNPO;ATP2B2;CALB1;SLC8A1;SLC8A2;GRM1;RGS7;RGS7BP;GRIN1;CHRNB2;CHRNA4;GRIA2;GRIA3;KCNA2;BEGAIN;NRXN2;FLOT2;NRXN3;EPS8;YWHAE;CTNND2;ZDHHC5;AGAP3;RAP2A;RALBP1;SNX27;SNX6;HSP90AA1;CNTNAP2;ADAM22;GIT1;DLG1;DLG4;MAP2K1;MAGI2;GSK3B;CAMK2A;PAK1;PAK3;RAPGEF4;NBEA;OGT;SNAP47;SACM1L;CPLX1;AP2B1;AP2M1;RAB5A;SH3GLB2;PPP3R1;IQSEC1;NEDD4;PACSIN1;PIP5K1C;SYNJ1;PICK1;USP46;NUMB;RALA;TSPAN7;VAC14;NF1;CAMK4;CRTC1;…	MGI:1099446;MGI:105368;MGI:88248;MGI:107956;MGI:107996;MGI:1351338;MGI:1346089;MGI:106334;MGI:95819;MGI:87891;MGI:87888;MGI:95809;MGI:95810;MGI:96659;MGI:3044626;MGI:1096362;MGI:103309;MGI:1096389;MGI:104684;MGI:894689;MGI:1195966;MGI:1923573;MGI:2183446;MGI:97855;MGI:108466;MGI:1923992;MGI:1919433;MGI:96250;MGI:1914047;MGI:1340046;MGI:1927140;MGI:107231;MGI:1277959;MGI:1346866;MGI:1354953;MGI:18…
GO:0099566	G2	BP	regulation of postsynaptic cytosolic calcium levels	│ ├─ regulation of postsynaptic cytosolic calcium levels	SYNGO:postsynprocess	0.000935408	0.00176452	HGNC:30672;HGNC:815;HGNC:1434;HGNC:11068;HGNC:11069;HGNC:4593	SYNPO;ATP2B2;CALB1;SLC8A1;SLC8A2;GRM1	MGI:1099446;MGI:105368;MGI:88248;MGI:107956;MGI:107996;MGI:1351338
GO:1905059	G8	BP	ATPase-coupled calcium ion transmembrane transporter activity involved in regulation of postsynaptic cytosolic calcium levels	│ │ ├─ ATPase-coupled calcium ion transmembrane transporter activity involved in regulation of postsynaptic cytosolic calcium levels	GO:0099566			HGNC:815	ATP2B2	MGI:105368
GO:0099567	G9	BP	calcium ion binding involved in regulation of postsynaptic cytosolic calcium levels	│ │ ├─ calcium ion binding involved in regulation of postsynaptic cytosolic calcium levels	GO:0099566			HGNC:1434	CALB1	MGI:88248
GO:1905060	G10	BP	calcium:cation antiporter activity involved in regulation of postsynaptic cytosolic calcium ion levels	│ │ ├─ calcium:cation antiporter activity involved in regulation of postsynaptic cytosolic calcium ion levels	GO:0099566			HGNC:11068;HGNC:11069	SLC8A1;SLC8A2	MGI:107956;MGI:107996
GO:0098695	G11	BP	inositol 1,4,5-trisphosphate receptor activity involved in regulation of postsynaptic cytosolic calcium levels	│ │ ├─ inositol 1,4,5-trisphosphate receptor activity involved in regulation of postsynaptic cytosolic calcium levels	GO:0099566
GO:0099583	G12	BP	neurotransmitter receptor activity involved in regulation of postsynaptic cytosolic calcium levels	│ │ └─ neurotransmitter receptor activity involved in regulation of postsynaptic cytosolic calcium levels	GO:0099566			HGNC:4593	GRM1	MGI:1351338
GO:0098872	G22	BP	G-protein coupled neurotransmitter receptor activity involved in regulation of postsynaptic cytosolic calcium levels	│ │ └─ G-protein coupled neurotransmitter receptor activity involved in regulation of postsynaptic cytosolic calcium levels	GO:0099583			HGNC:4593	GRM1	MGI:1351338
GO:0060078	G3	BP	regulation of postsynaptic membrane potential	│ ├─ regulation of postsynaptic membrane potential	SYNGO:postsynprocess	0.0654205	0.0687329	HGNC:10003;HGNC:23271;HGNC:4584;HGNC:1962;HGNC:1958;HGNC:4572;HGNC:4573;HGNC:6220	RGS7;RGS7BP;GRIN1;CHRNB2;CHRNA4;GRIA2;GRIA3;KCNA2	MGI:1346089;MGI:106334;MGI:95819;MGI:87891;MGI:87888;MGI:95809;MGI:95810;MGI:96659
GO:0140233	G13	BP	intracellular cAMP-activated cation channel activity involved in regulation of postsynaptic membrane potential	│ │ ├─ intracellular cAMP-activated cation channel activity involved in regulation of postsynaptic membrane potential	GO:0060078
GO:0099579	G23	BP	G protein-coupled neurotransmitter receptor activity involved in regulation of postsynaptic membrane potential	│ │ │ └─ G protein-coupled neurotransmitter receptor activity involved in regulation of postsynaptic membrane potential	GO:0140233
GO:1904315	G14	BP	transmitter-gated ion channel activity involved in regulation of postsynaptic membrane potential	│ │ ├─ transmitter-gated ion channel activity involved in regulation of postsynaptic membrane potential	GO:0060078	0.218691	0.218691	HGNC:4584;HGNC:1962;HGNC:1958;HGNC:4572;HGNC:4573	GRIN1;CHRNB2;CHRNA4;GRIA2;GRIA3	MGI:95819;MGI:87891;MGI:87888;MGI:95809;MGI:95810
GO:1905030	G15	BP	voltage-gated ion channel activity involved in regulation of postsynaptic membrane potential	│ │ └─ voltage-gated ion channel activity involved in regulation of postsynaptic membrane potential	GO:0060078			HGNC:6220	KCNA2	MGI:96659
GO:0098962	G4	BP	regulation of postsynaptic neurotransmitter receptor activity	│ ├─ regulation of postsynaptic neurotransmitter receptor activity	SYNGO:postsynprocess			HGNC:24163;HGNC:8009	BEGAIN;NRXN2	MGI:3044626;MGI:1096362
GO:0099072	G5	BP	regulation of postsynaptic membrane neurotransmitter receptor levels	│ ├─ regulation of postsynaptic membrane neurotransmitter receptor levels	SYNGO:postsynprocess	5.91001e-16	6.13164e-15	HGNC:3758;HGNC:8010;HGNC:3420;HGNC:12851;HGNC:2516;HGNC:18472;HGNC:16923;HGNC:9861;HGNC:9841;HGNC:20073;HGNC:14970;HGNC:5253;HGNC:13830;HGNC:201;HGNC:4272;HGNC:2900;HGNC:2903;HGNC:6840;HGNC:18957;HGNC:4617;HGNC:1460;HGNC:8590;HGNC:8592;HGNC:16626;HGNC:7648;HGNC:8127;HGNC:30669;HGNC:17059;HGNC:2309;HGNC:563;HGNC:564;HGNC:9783;HGNC:10834;HGNC:9317;HGNC:29112;HGNC:7727;HGNC:8570;HGNC:8996;HGNC:11503…	FLOT2;NRXN3;EPS8;YWHAE;CTNND2;ZDHHC5;AGAP3;RAP2A;RALBP1;SNX27;SNX6;HSP90AA1;CNTNAP2;ADAM22;GIT1;DLG1;DLG4;MAP2K1;MAGI2;GSK3B;CAMK2A;PAK1;PAK3;RAPGEF4;NBEA;OGT;SNAP47;SACM1L;CPLX1;AP2B1;AP2M1;RAB5A;SH3GLB2;PPP3R1;IQSEC1;NEDD4;PACSIN1;PIP5K1C;SYNJ1;PICK1;USP46;NUMB;RALA;TSPAN7;VAC14	MGI:103309;MGI:1096389;MGI:104684;MGI:894689;MGI:1195966;MGI:1923573;MGI:2183446;MGI:97855;MGI:108466;MGI:1923992;MGI:1919433;MGI:96250;MGI:1914047;MGI:1340046;MGI:1927140;MGI:107231;MGI:1277959;MGI:1346866;MGI:1354953;MGI:1861437;MGI:88256;MGI:1339975;MGI:1339656;MGI:1917723;MGI:1347075;MGI:1339639;MGI:1915076;MGI:1933169;MGI:104727;MGI:1919020;MGI:1298405;MGI:105926;MGI:2385131;MGI:107172;MGI:1…
GO:0099645	G16	BP	neurotransmitter receptor localization to postsynaptic specialization membrane	│ │ ├─ neurotransmitter receptor localization to postsynaptic specialization membrane	GO:0099072	2.79035e-05	8.27139e-05	HGNC:201;HGNC:4272;HGNC:2900;HGNC:2903;HGNC:8010;HGNC:6840;HGNC:18957;HGNC:4617;HGNC:1460;HGNC:8590;HGNC:8592;HGNC:16626;HGNC:7648;HGNC:8127	ADAM22;GIT1;DLG1;DLG4;NRXN3;MAP2K1;MAGI2;GSK3B;CAMK2A;PAK1;PAK3;RAPGEF4;NBEA;OGT	MGI:1340046;MGI:1927140;MGI:107231;MGI:1277959;MGI:1096389;MGI:1346866;MGI:1354953;MGI:1861437;MGI:88256;MGI:1339975;MGI:1339656;MGI:1917723;MGI:1347075;MGI:1339639
GO:0098696	G24	BP	regulation of neurotransmitter receptor localization to postsynaptic specialization membrane	│ │ │ └─ regulation of neurotransmitter receptor localization to postsynaptic specialization membrane	GO:0099645	0.00016649	0.000431832	HGNC:6840;HGNC:18957;HGNC:4617;HGNC:1460;HGNC:8590;HGNC:8592;HGNC:16626;HGNC:7648;HGNC:8127	MAP2K1;MAGI2;GSK3B;CAMK2A;PAK1;PAK3;RAPGEF4;NBEA;OGT	MGI:1346866;MGI:1354953;MGI:1861437;MGI:88256;MGI:1339975;MGI:1339656;MGI:1917723;MGI:1347075;MGI:1339639
GO:0098967	G17	BP	exocytic insertion of neurotransmitter receptor to postsynaptic membrane	│ │ ├─ exocytic insertion of neurotransmitter receptor to postsynaptic membrane	GO:0099072	0.0198073	0.0241766	HGNC:30669;HGNC:17059;HGNC:2309	SNAP47;SACM1L;CPLX1	MGI:1915076;MGI:1933169;MGI:104727
GO:0099145	G25	BP	regulation of exocytic insertion of neurotransmitter receptor to postsynaptic membrane	│ │ │ └─ regulation of exocytic insertion of neurotransmitter receptor to postsynaptic membrane	GO:0098967			HGNC:2309	CPLX1	MGI:104727
GO:0098970	G18	BP	postsynaptic neurotransmitter receptor diffusion trapping	│ │ ├─ postsynaptic neurotransmitter receptor diffusion trapping	GO:0099072
GO:0150054	G26	BP	regulation of postsynaptic neurotransmitter receptor diffusion trapping	│ │ │ └─ regulation of postsynaptic neurotransmitter receptor diffusion trapping	GO:0098970
GO:0098884	G19	BP	postsynaptic neurotransmitter receptor endocytosis	│ │ └─ postsynaptic neurotransmitter receptor endocytosis	GO:0099072	3.86471e-07	1.88689e-06	HGNC:563;HGNC:564;HGNC:9783;HGNC:10834;HGNC:9317;HGNC:29112;HGNC:7727;HGNC:8570;HGNC:8996;HGNC:11503;HGNC:9394;HGNC:20075;HGNC:8060;HGNC:9839;HGNC:11854;HGNC:25507	AP2B1;AP2M1;RAB5A;SH3GLB2;PPP3R1;IQSEC1;NEDD4;PACSIN1;PIP5K1C;SYNJ1;PICK1;USP46;NUMB;RALA;TSPAN7;VAC14	MGI:1919020;MGI:1298405;MGI:105926;MGI:2385131;MGI:107172;MGI:1196356;MGI:97297;MGI:1345181;MGI:1298224;MGI:1354961;MGI:894645;MGI:1916977;MGI:107423;MGI:1927243;MGI:1298407;MGI:2157980
GO:0099149	G27	BP	regulation of postsynaptic neurotransmitter receptor endocytosis	│ │ └─ regulation of postsynaptic neurotransmitter receptor endocytosis	GO:0098884	1.66515e-05	5.31568e-05	HGNC:9317;HGNC:29112;HGNC:7727;HGNC:8570;HGNC:8996;HGNC:11503;HGNC:9394;HGNC:20075;HGNC:8060;HGNC:9839;HGNC:11854;HGNC:25507	PPP3R1;IQSEC1;NEDD4;PACSIN1;PIP5K1C;SYNJ1;PICK1;USP46;NUMB;RALA;TSPAN7;VAC14	MGI:107172;MGI:1196356;MGI:97297;MGI:1345181;MGI:1298224;MGI:1354961;MGI:894645;MGI:1916977;MGI:107423;MGI:1927243;MGI:1298407;MGI:2157980
GO:0150038	G6	BP	postsynaptic dense core vesicle exocytosis	│ ├─ postsynaptic dense core vesicle exocytosis	SYNGO:postsynprocess
GO:0150044	G20	BP	regulation of postsynaptic dense core vesicle exocytosis	│ │ └─ regulation of postsynaptic dense core vesicle exocytosis	GO:0150038
GO:0098926	G7	BP	postsynaptic signaling pathway	│ └─ postsynaptic signaling pathway	SYNGO:postsynprocess	0.00113192	0.00208777	HGNC:7765;HGNC:1464;HGNC:16062;HGNC:24600;HGNC:11364;HGNC:4851;HGNC:6394	NF1;CAMK4;CRTC1;ANKS1B;STAT3;HTT;KPNA1	MGI:97306;MGI:88258;MGI:2142523;MGI:1924781;MGI:103038;MGI:96067;MGI:103560
GO:0099527	G21	BP	postsynapse to nucleus signaling pathway	│ └─ postsynapse to nucleus signaling pathway	GO:0098926	0.00296651	0.00482786	HGNC:1464;HGNC:16062;HGNC:24600;HGNC:11364;HGNC:4851;HGNC:6394	CAMK4;CRTC1;ANKS1B;STAT3;HTT;KPNA1	MGI:88258;MGI:2142523;MGI:1924781;MGI:103038;MGI:96067;MGI:103560
GO:1905539	G28	BP	regulation of postsynapse to nucleus signaling pathway	│ └─ regulation of postsynapse to nucleus signaling pathway	GO:0099527
GO:0099536	H1	BP	synaptic signaling	├─ synaptic signaling	SYNGO:synprocess	1.16229e-14		HGNC:8010;HGNC:3287;HGNC:9681;HGNC:9668;HGNC:15917;HGNC:8008;HGNC:8590;HGNC:5951;HGNC:17867;HGNC:9390;HGNC:9392;HGNC:232;HGNC:370;HGNC:11364;HGNC:5044;HGNC:30829;HGNC:4037;HGNC:4597;HGNC:1750;HGNC:81;HGNC:1014;HGNC:2852;HGNC:6470;HGNC:2972;HGNC:8571;HGNC:6877;HGNC:1874;HGNC:18747;HGNC:15474;HGNC:8881;HGNC:8882;HGNC:12496;HGNC:14540;HGNC:8574;HGNC:6881;HGNC:14085;HGNC:9401;HGNC:578;HGNC:579;HGNC:1…	NRXN3;EIF4E;PTPRS;PTPRD;PLCB1;NRXN1;PAK1;CADM1;NPTN;PRKAR1B;PRKAR2B;ADCY1;AKAP12;STAT3;HNRNPK;TUBB2B;FYN;GRM5;CDH11;ABR;BCR;DGKE;L1CAM;DNM1;PACSIN2;MAPK3;CFL1;CNTNAP4;SHANK1;PFN1;PFN2;UBE3A;WNK1;PAFAH1B1;MAPK8;RTN4;PRKCE;APBA1;APBA2;GIPC1;GSK3B;CHRNB2;CHRNA4;YWHAH;GRM2;ANKS1B;SYNPO;PPP3R1;PPP3CA;DCC;PRKACA;CAMK4;IQSEC1;SLC1A1	MGI:1096389;MGI:95305;MGI:97815;MGI:97812;MGI:97613;MGI:1096391;MGI:1339975;MGI:1889272;MGI:108077;MGI:97759;MGI:97760;MGI:99677;MGI:1932576;MGI:103038;MGI:99894;MGI:1920960;MGI:95602;MGI:1351342;MGI:99217;MGI:107771;MGI:88141;MGI:1889276;MGI:96721;MGI:107384;MGI:1345153;MGI:1346859;MGI:101757;MGI:2183572;MGI:3613677;MGI:97549;MGI:97550;MGI:105098;MGI:2442092;MGI:109520;MGI:1346861;MGI:1915835;MG…
GO:0099537	H2	BP	trans-synaptic signaling	│ ├─ trans-synaptic signaling	GO:0099536	2.62841e-15	2.42398e-14	HGNC:8010;HGNC:3287;HGNC:9681;HGNC:9668;HGNC:15917;HGNC:8008;HGNC:8590;HGNC:5951;HGNC:17867;HGNC:9390;HGNC:9392;HGNC:232;HGNC:370;HGNC:11364;HGNC:5044;HGNC:30829;HGNC:4037;HGNC:4597;HGNC:1750;HGNC:81;HGNC:1014;HGNC:2852;HGNC:6470;HGNC:2972;HGNC:8571;HGNC:6877;HGNC:1874;HGNC:18747;HGNC:15474;HGNC:8881;HGNC:8882;HGNC:12496;HGNC:14540;HGNC:8574;HGNC:6881;HGNC:14085;HGNC:9401;HGNC:578;HGNC:579;HGNC:1…	NRXN3;EIF4E;PTPRS;PTPRD;PLCB1;NRXN1;PAK1;CADM1;NPTN;PRKAR1B;PRKAR2B;ADCY1;AKAP12;STAT3;HNRNPK;TUBB2B;FYN;GRM5;CDH11;ABR;BCR;DGKE;L1CAM;DNM1;PACSIN2;MAPK3;CFL1;CNTNAP4;SHANK1;PFN1;PFN2;UBE3A;WNK1;PAFAH1B1;MAPK8;RTN4;PRKCE;APBA1;APBA2;GIPC1;GSK3B;CHRNB2;CHRNA4;YWHAH;GRM2;ANKS1B;SYNPO;PPP3R1;PPP3CA;DCC;PRKACA;CAMK4;IQSEC1;SLC1A1	MGI:1096389;MGI:95305;MGI:97815;MGI:97812;MGI:97613;MGI:1096391;MGI:1339975;MGI:1889272;MGI:108077;MGI:97759;MGI:97760;MGI:99677;MGI:1932576;MGI:103038;MGI:99894;MGI:1920960;MGI:95602;MGI:1351342;MGI:99217;MGI:107771;MGI:88141;MGI:1889276;MGI:96721;MGI:107384;MGI:1345153;MGI:1346859;MGI:101757;MGI:2183572;MGI:3613677;MGI:97549;MGI:97550;MGI:105098;MGI:2442092;MGI:109520;MGI:1346861;MGI:1915835;MG…
GO:0099541	H5	BP	trans-synaptic signaling by lipid	│ │ ├─ trans-synaptic signaling by lipid	GO:0099537	0.0198073		HGNC:15917;HGNC:8008;HGNC:8590	PLCB1;NRXN1;PAK1	MGI:97613;MGI:1096391;MGI:1339975
GO:0099542	H13	BP	trans-synaptic signaling by endocannabinoid	│ │ │ └─ trans-synaptic signaling by endocannabinoid	GO:0099541	0.0198073	0.0241766	HGNC:15917;HGNC:8008;HGNC:8590	PLCB1;NRXN1;PAK1	MGI:97613;MGI:1096391;MGI:1339975
GO:0098921	H21	BP	retrograde trans-synaptic signaling by endocannabinoid	│ │ │ ├─ retrograde trans-synaptic signaling by endocannabinoid	GO:0099542			HGNC:15917	PLCB1	MGI:97613
GO:0099178	H26	BP	regulation of retrograde trans-synaptic signaling by endocanabinoid	│ │ │ │ └─ regulation of retrograde trans-synaptic signaling by endocanabinoid	GO:0098921			HGNC:15917	PLCB1	MGI:97613
GO:0099553	H22	BP	trans-synaptic signaling by endocannabinoid, modulating synaptic transmission	│ │ │ └─ trans-synaptic signaling by endocannabinoid, modulating synaptic transmission	GO:0099542			HGNC:8008;HGNC:8590	NRXN1;PAK1	MGI:1096391;MGI:1339975
GO:0150036	H27	BP	regulation of trans-synaptic signaling by endocannabinoid, modulating synaptic transmission	│ │ │ └─ regulation of trans-synaptic signaling by endocannabinoid, modulating synaptic transmission	GO:0099553			HGNC:8008;HGNC:8590	NRXN1;PAK1	MGI:1096391;MGI:1339975
GO:0099540	H6	BP	trans-synaptic signaling by neuropeptide	│ │ ├─ trans-synaptic signaling by neuropeptide	GO:0099537
GO:0099543	H7	BP	trans-synaptic signaling by soluble gas	│ │ ├─ trans-synaptic signaling by soluble gas	GO:0099537
GO:0099548	H14	BP	trans-synaptic signaling by nitric oxide	│ │ │ └─ trans-synaptic signaling by nitric oxide	GO:0099543
GO:0099555	H23	BP	trans-synaptic signaling by nitric oxide, modulating synaptic transmission	│ │ │ └─ trans-synaptic signaling by nitric oxide, modulating synaptic transmission	GO:0099548
GO:0098925	H28	BP	retrograde trans-synaptic signaling by nitric oxide, modulating synaptic transmission	│ │ │ └─ retrograde trans-synaptic signaling by nitric oxide, modulating synaptic transmission	GO:0099555
GO:0099545	H8	BP	trans-synaptic signaling by trans-synaptic complex	│ │ ├─ trans-synaptic signaling by trans-synaptic complex	GO:0099537	0.079	0.0819625	HGNC:9668;HGNC:5951;HGNC:17867	PTPRD;CADM1;NPTN	MGI:97812;MGI:1889272;MGI:108077
GO:0098942	H15	BP	retrograde trans-synaptic signaling by trans-synaptic protein complex	│ │ │ ├─ retrograde trans-synaptic signaling by trans-synaptic protein complex	GO:0099545			HGNC:5951	CADM1	MGI:1889272
GO:0099557	H16	BP	trans-synaptic signaling by trans-synaptic complex, modulating synaptic transmission	│ │ │ └─ trans-synaptic signaling by trans-synaptic complex, modulating synaptic transmission	GO:0099545			HGNC:17867	NPTN	MGI:108077
GO:0099157	H9	BP	trans-synaptic signalling via exosome	│ │ ├─ trans-synaptic signalling via exosome	GO:0099537
GO:0099183	H10	BP	trans-synaptic signaling by BDNF, modulating synaptic transmission	│ │ ├─ trans-synaptic signaling by BDNF, modulating synaptic transmission	GO:0099537
GO:0150035	H17	BP	regulation of trans-synaptic signaling by BDNF, modulating synaptic transmission	│ │ │ └─ regulation of trans-synaptic signaling by BDNF, modulating synaptic transmission	GO:0099183
GO:0007268	H11	BP	chemical synaptic transmission	│ │ └─ chemical synaptic transmission	GO:0099537	1.05909e-14	8.79045e-14	HGNC:9390;HGNC:9392;HGNC:232;HGNC:370;HGNC:11364;HGNC:5044;HGNC:30829;HGNC:4037;HGNC:4597;HGNC:1750;HGNC:81;HGNC:1014;HGNC:2852;HGNC:6470;HGNC:9668;HGNC:9681;HGNC:2972;HGNC:8571;HGNC:6877;HGNC:1874;HGNC:18747;HGNC:15474;HGNC:8881;HGNC:8882;HGNC:12496;HGNC:14540;HGNC:8574;HGNC:6881;HGNC:14085;HGNC:9401;HGNC:578;HGNC:579;HGNC:8010;HGNC:1226;HGNC:4617;HGNC:1962;HGNC:1958;HGNC:12853;HGNC:4594;HGNC:24…	PRKAR1B;PRKAR2B;ADCY1;AKAP12;STAT3;HNRNPK;TUBB2B;FYN;GRM5;CDH11;ABR;BCR;DGKE;L1CAM;PTPRD;PTPRS;DNM1;PACSIN2;MAPK3;CFL1;CNTNAP4;SHANK1;PFN1;PFN2;UBE3A;WNK1;PAFAH1B1;MAPK8;RTN4;PRKCE;APBA1;APBA2;NRXN3;GIPC1;GSK3B;CHRNB2;CHRNA4;YWHAH;GRM2;ANKS1B;SYNPO;PLCB1;PPP3R1;PPP3CA;DCC;PRKACA;CAMK4;IQSEC1;SLC1A1	MGI:97759;MGI:97760;MGI:99677;MGI:1932576;MGI:103038;MGI:99894;MGI:1920960;MGI:95602;MGI:1351342;MGI:99217;MGI:107771;MGI:88141;MGI:1889276;MGI:96721;MGI:97812;MGI:97815;MGI:107384;MGI:1345153;MGI:1346859;MGI:101757;MGI:2183572;MGI:3613677;MGI:97549;MGI:97550;MGI:105098;MGI:2442092;MGI:109520;MGI:1346861;MGI:1915835;MGI:97599;MGI:1860297;MGI:1261791;MGI:1096389;MGI:1926252;MGI:1861437;MGI:87891;M…
GO:0050804	H18	BP	modulation of chemical synaptic transmission	│ │ ├─ modulation of chemical synaptic transmission	GO:0007268	1.3822e-09	9.5602e-09	HGNC:9390;HGNC:9392;HGNC:232;HGNC:370;HGNC:11364;HGNC:5044;HGNC:30829;HGNC:4037;HGNC:4597;HGNC:1750;HGNC:81;HGNC:1014;HGNC:2852;HGNC:6470;HGNC:9668;HGNC:9681;HGNC:2972;HGNC:8571;HGNC:6877;HGNC:1874;HGNC:18747;HGNC:15474;HGNC:8881;HGNC:8882;HGNC:12496;HGNC:14540;HGNC:8574;HGNC:6881;HGNC:14085	PRKAR1B;PRKAR2B;ADCY1;AKAP12;STAT3;HNRNPK;TUBB2B;FYN;GRM5;CDH11;ABR;BCR;DGKE;L1CAM;PTPRD;PTPRS;DNM1;PACSIN2;MAPK3;CFL1;CNTNAP4;SHANK1;PFN1;PFN2;UBE3A;WNK1;PAFAH1B1;MAPK8;RTN4	MGI:97759;MGI:97760;MGI:99677;MGI:1932576;MGI:103038;MGI:99894;MGI:1920960;MGI:95602;MGI:1351342;MGI:99217;MGI:107771;MGI:88141;MGI:1889276;MGI:96721;MGI:97812;MGI:97815;MGI:107384;MGI:1345153;MGI:1346859;MGI:101757;MGI:2183572;MGI:3613677;MGI:97549;MGI:97550;MGI:105098;MGI:2442092;MGI:109520;MGI:1346861;MGI:1915835
GO:0099531	H19	BP	presynaptic process involved in chemical synaptic transmission	│ │ ├─ presynaptic process involved in chemical synaptic transmission	GO:0007268	0.000408798		HGNC:9401;HGNC:232;HGNC:8882;HGNC:578;HGNC:579;HGNC:8010;HGNC:1226;HGNC:4617;HGNC:1962;HGNC:1958;HGNC:12853;HGNC:4594	PRKCE;ADCY1;PFN2;APBA1;APBA2;NRXN3;GIPC1;GSK3B;CHRNB2;CHRNA4;YWHAH;GRM2	MGI:97599;MGI:99677;MGI:97550;MGI:1860297;MGI:1261791;MGI:1096389;MGI:1926252;MGI:1861437;MGI:87891;MGI:87888;MGI:109194;MGI:1351339
GO:0099171	H24	BP	presynaptic modulation of chemical synaptic transmission	│ │ │ └─ presynaptic modulation of chemical synaptic transmission	GO:0099531	0.000408798	0.000870005	HGNC:9401;HGNC:232;HGNC:8882;HGNC:578;HGNC:579;HGNC:8010;HGNC:1226;HGNC:4617;HGNC:1962;HGNC:1958;HGNC:12853;HGNC:4594	PRKCE;ADCY1;PFN2;APBA1;APBA2;NRXN3;GIPC1;GSK3B;CHRNB2;CHRNA4;YWHAH;GRM2	MGI:97599;MGI:99677;MGI:97550;MGI:1860297;MGI:1261791;MGI:1096389;MGI:1926252;MGI:1861437;MGI:87891;MGI:87888;MGI:109194;MGI:1351339
GO:0099565	H20	BP	postsynaptic process involved in chemical synaptic transmission	│ │ └─ postsynaptic process involved in chemical synaptic transmission	GO:0007268	0.000226865	0.000508913	HGNC:24600;HGNC:30672;HGNC:15917;HGNC:9317;HGNC:9314;HGNC:2701;HGNC:9380;HGNC:1464;HGNC:29112;HGNC:10939	ANKS1B;SYNPO;PLCB1;PPP3R1;PPP3CA;DCC;PRKACA;CAMK4;IQSEC1;SLC1A1	MGI:1924781;MGI:1099446;MGI:97613;MGI:107172;MGI:107164;MGI:94869;MGI:97592;MGI:88258;MGI:1196356;MGI:105083
GO:0099170	H25	BP	postsynaptic modulation of chemical synaptic transmission	│ │ └─ postsynaptic modulation of chemical synaptic transmission	GO:0099565	0.000569514	0.00118174	HGNC:30672;HGNC:15917;HGNC:9317;HGNC:9314;HGNC:2701;HGNC:9380;HGNC:1464;HGNC:29112;HGNC:10939	SYNPO;PLCB1;PPP3R1;PPP3CA;DCC;PRKACA;CAMK4;IQSEC1;SLC1A1	MGI:1099446;MGI:97613;MGI:107172;MGI:107164;MGI:94869;MGI:97592;MGI:88258;MGI:1196356;MGI:105083
GO:0099538	H3	BP	synaptic signaling via neuropeptide	│ ├─ synaptic signaling via neuropeptide	GO:0099536
GO:0099163	H4	BP	synaptic signaling by nitric oxide	│ └─ synaptic signaling by nitric oxide	GO:0099536
GO:0150045	H12	BP	regulation of synaptic signaling by nitric oxide	│ └─ regulation of synaptic signaling by nitric oxide	GO:0099163
GO:0050808	I1	BP	synapse organization	├─ synapse organization	SYNGO:synprocess	2.54604e-28	5.28303e-27	HGNC:581;HGNC:9681;HGNC:7648;HGNC:14258;HGNC:14291;HGNC:1717;HGNC:19701;HGNC:3084;HGNC:17848;HGNC:18415;HGNC:24011;HGNC:6139;HGNC:10011;HGNC:5044;HGNC:14295;HGNC:12363;HGNC:655;HGNC:2720;HGNC:16626;HGNC:5241;HGNC:16835;HGNC:1736;HGNC:8592;HGNC:3332;HGNC:7765;HGNC:6183;HGNC:8574;HGNC:3338;HGNC:4617;HGNC:667;HGNC:668;HGNC:1874;HGNC:12734;HGNC:12732;HGNC:2510;HGNC:8881;HGNC:8882;HGNC:13759;HGNC:6759…	APBB1;PTPRS;NBEA;CD2AP;NLGN1;SEPTIN7;CNKSR2;DVL1;STK38L;HIP1R;ABI2;ITGA3;RHEB;HNRNPK;SHANK2;TSC2;ARF4;ASAP1;RAPGEF4;HSPA8;TAOK2;CDC42;PAK3;MARK2;NF1;ITSN1;PAFAH1B1;CTTN;GSK3B;RHOA;RHOB;CFL1;WASF3;WASF1;CTNNA2;PFN1;PFN2;CYFIP1;MARCKS;MYH10;NCKAP1;VCP;CSNK2B;CAMK1;CNTNAP4;SEPTIN11;TUBB;GPM6A;NECTIN1;PPFIA2;RIMS1;PCLO;RIMBP2;BSN;ERC1;ERC2;PLS3;ACTN1;DNM3;ACTB;ACTG1;CAMK2B;DBNL;MAGI2;GIT1;SHANK1;DLG4…	MGI:107765;MGI:97815;MGI:1347075;MGI:1330281;MGI:2179435;MGI:1335094;MGI:2661175;MGI:94941;MGI:1922250;MGI:1352504;MGI:106913;MGI:96602;MGI:97912;MGI:99894;MGI:2671987;MGI:102548;MGI:99433;MGI:1342335;MGI:1917723;MGI:105384;MGI:1915919;MGI:106211;MGI:1339656;MGI:99638;MGI:97306;MGI:1338069;MGI:109520;MGI:99695;MGI:1861437;MGI:1096342;MGI:107949;MGI:101757;MGI:2658986;MGI:1890563;MGI:88275;MGI:975…
GO:0099172	I2	BP	presynapse organization	│ ├─ presynapse organization	GO:0050808			HGNC:14291	NLGN1	MGI:2179435
GO:0099174	I16	BP	regulation of presynapse organization	│ │ └─ regulation of presynapse organization	GO:0099172			HGNC:14291	NLGN1	MGI:2179435
GO:0099173	I3	BP	postsynapse organization	│ ├─ postsynapse organization	GO:0050808	2.30624e-07	1.27612e-06	HGNC:1717;HGNC:19701;HGNC:3084;HGNC:17848;HGNC:18415;HGNC:24011;HGNC:6139;HGNC:10011;HGNC:5044;HGNC:14295;HGNC:12363;HGNC:655;HGNC:2720;HGNC:16626;HGNC:5241;HGNC:16835;HGNC:1736;HGNC:8592;HGNC:3332;HGNC:7765;HGNC:6183;HGNC:8574	SEPTIN7;CNKSR2;DVL1;STK38L;HIP1R;ABI2;ITGA3;RHEB;HNRNPK;SHANK2;TSC2;ARF4;ASAP1;RAPGEF4;HSPA8;TAOK2;CDC42;PAK3;MARK2;NF1;ITSN1;PAFAH1B1	MGI:1335094;MGI:2661175;MGI:94941;MGI:1922250;MGI:1352504;MGI:106913;MGI:96602;MGI:97912;MGI:99894;MGI:2671987;MGI:102548;MGI:99433;MGI:1342335;MGI:1917723;MGI:105384;MGI:1915919;MGI:106211;MGI:1339656;MGI:99638;MGI:97306;MGI:1338069;MGI:109520
GO:0099175	I17	BP	regulation of postsynapse organization	│ │ ├─ regulation of postsynapse organization	GO:0099173	1.59868e-05	5.30763e-05	HGNC:10011;HGNC:5044;HGNC:14295;HGNC:12363;HGNC:655;HGNC:2720;HGNC:16626;HGNC:5241;HGNC:16835;HGNC:3084;HGNC:1736;HGNC:8592;HGNC:3332;HGNC:7765;HGNC:6183;HGNC:8574	RHEB;HNRNPK;SHANK2;TSC2;ARF4;ASAP1;RAPGEF4;HSPA8;TAOK2;DVL1;CDC42;PAK3;MARK2;NF1;ITSN1;PAFAH1B1	MGI:97912;MGI:99894;MGI:2671987;MGI:102548;MGI:99433;MGI:1342335;MGI:1917723;MGI:105384;MGI:1915919;MGI:94941;MGI:106211;MGI:1339656;MGI:99638;MGI:97306;MGI:1338069;MGI:109520
GO:0099084	I18	BP	postsynaptic specialization organization	│ │ └─ postsynaptic specialization organization	GO:0099173
GO:0099563	I4	BP	modification of synaptic structure	│ ├─ modification of synaptic structure	GO:0050808	6.11925e-08		HGNC:3338;HGNC:1736;HGNC:4617;HGNC:7765;HGNC:667;HGNC:668;HGNC:1874;HGNC:12734;HGNC:12732;HGNC:2510;HGNC:8881;HGNC:8882;HGNC:13759;HGNC:6759;HGNC:6183;HGNC:7568	CTTN;CDC42;GSK3B;NF1;RHOA;RHOB;CFL1;WASF3;WASF1;CTNNA2;PFN1;PFN2;CYFIP1;MARCKS;ITSN1;MYH10	MGI:99695;MGI:106211;MGI:1861437;MGI:97306;MGI:1096342;MGI:107949;MGI:101757;MGI:2658986;MGI:1890563;MGI:88275;MGI:97549;MGI:97550;MGI:1338801;MGI:96907;MGI:1338069;MGI:1930780
GO:0099010	I19	BP	modification of postsynaptic structure	│ │ └─ modification of postsynaptic structure	GO:0099563	4.35585e-08	2.78104e-07	HGNC:3338;HGNC:1736;HGNC:4617;HGNC:7765;HGNC:667;HGNC:668;HGNC:1874;HGNC:12734;HGNC:12732;HGNC:2510;HGNC:8881;HGNC:8882;HGNC:13759;HGNC:6759;HGNC:6183;HGNC:7568	CTTN;CDC42;GSK3B;NF1;RHOA;RHOB;CFL1;WASF3;WASF1;CTNNA2;PFN1;PFN2;CYFIP1;MARCKS;ITSN1;MYH10	MGI:99695;MGI:106211;MGI:1861437;MGI:97306;MGI:1096342;MGI:107949;MGI:101757;MGI:2658986;MGI:1890563;MGI:88275;MGI:97549;MGI:97550;MGI:1338801;MGI:96907;MGI:1338069;MGI:1930780
GO:0099159	I34	BP	regulation of modification of postsynaptic structure	│ │ ├─ regulation of modification of postsynaptic structure	GO:0099010	0.00179199	0.00297471	HGNC:1736;HGNC:4617;HGNC:7765;HGNC:667;HGNC:668	CDC42;GSK3B;NF1;RHOA;RHOB	MGI:106211;MGI:1861437;MGI:97306;MGI:1096342;MGI:107949
GO:0098885	I35	BP	modification of postsynaptic actin cytoskeleton	│ │ └─ modification of postsynaptic actin cytoskeleton	GO:0099010	2.81613e-07	1.46087e-06	HGNC:1874;HGNC:12734;HGNC:12732;HGNC:3338;HGNC:2510;HGNC:8881;HGNC:8882;HGNC:13759;HGNC:6759;HGNC:6183;HGNC:7568;HGNC:667	CFL1;WASF3;WASF1;CTTN;CTNNA2;PFN1;PFN2;CYFIP1;MARCKS;ITSN1;MYH10;RHOA	MGI:101757;MGI:2658986;MGI:1890563;MGI:99695;MGI:88275;MGI:97549;MGI:97550;MGI:1338801;MGI:96907;MGI:1338069;MGI:1930780;MGI:1096342
GO:1905274	I47	BP	regulation of modification of postsynaptic actin cytoskeleton	│ │ └─ regulation of modification of postsynaptic actin cytoskeleton	GO:0098885	0.00122058	0.00213683	HGNC:13759;HGNC:6759;HGNC:6183;HGNC:7568;HGNC:667	CYFIP1;MARCKS;ITSN1;MYH10;RHOA	MGI:1338801;MGI:96907;MGI:1338069;MGI:1930780;MGI:1096342
GO:0050807	I5	BP	regulation of synapse organization	│ ├─ regulation of synapse organization	GO:0050808	0.000226865	0.000508913	HGNC:7666;HGNC:12666;HGNC:2460;HGNC:1459;HGNC:18747;HGNC:655;HGNC:25589;HGNC:20778;HGNC:4460;HGNC:9706	NCKAP1;VCP;CSNK2B;CAMK1;CNTNAP4;ARF4;SEPTIN11;TUBB;GPM6A;NECTIN1	MGI:1355333;MGI:99919;MGI:88548;MGI:1098535;MGI:2183572;MGI:99433;MGI:1277214;MGI:107812;MGI:107671;MGI:1926483
GO:0098918	I6	BP	structural constituent of synapse	│ ├─ structural constituent of synapse	GO:0050808	4.77249e-12	3.60106e-11	HGNC:9246;HGNC:17282;HGNC:13406;HGNC:30339;HGNC:1117;HGNC:17072;HGNC:31922;HGNC:9091;HGNC:163;HGNC:29125;HGNC:1717;HGNC:132;HGNC:144;HGNC:1461;HGNC:2696;HGNC:18957;HGNC:4272;HGNC:15474;HGNC:14295;HGNC:2903;HGNC:2900;HGNC:2516	PPFIA2;RIMS1;PCLO;RIMBP2;BSN;ERC1;ERC2;PLS3;ACTN1;DNM3;SEPTIN7;ACTB;ACTG1;CAMK2B;DBNL;MAGI2;GIT1;SHANK1;SHANK2;DLG4;DLG1;CTNND2	MGI:2443834;MGI:2152971;MGI:1349390;MGI:2443235;MGI:1277955;MGI:2151013;MGI:1098749;MGI:104807;MGI:2137706;MGI:1341299;MGI:1335094;MGI:87904;MGI:87906;MGI:88257;MGI:700006;MGI:1354953;MGI:1927140;MGI:3613677;MGI:2671987;MGI:1277959;MGI:107231;MGI:1195966
GO:0099181	I20	BP	structural constituent of presynapse	│ │ ├─ structural constituent of presynapse	GO:0098918	1.13228e-05	3.91581e-05	HGNC:9246;HGNC:17282;HGNC:13406;HGNC:30339;HGNC:1117;HGNC:17072;HGNC:31922;HGNC:9091	PPFIA2;RIMS1;PCLO;RIMBP2;BSN;ERC1;ERC2;PLS3	MGI:2443834;MGI:2152971;MGI:1349390;MGI:2443235;MGI:1277955;MGI:2151013;MGI:1098749;MGI:104807
GO:0098882	I36	BP	structural constituent of active zone	│ │ │ ├─ structural constituent of active zone	GO:0099181	0.000192043	0.000455416	HGNC:17282;HGNC:13406;HGNC:30339;HGNC:1117;HGNC:17072;HGNC:31922	RIMS1;PCLO;RIMBP2;BSN;ERC1;ERC2	MGI:2152971;MGI:1349390;MGI:2443235;MGI:1277955;MGI:2151013;MGI:1098749
GO:0098699	I37	BP	structural constituent of presynaptic actin cytoskeleton	│ │ │ └─ structural constituent of presynaptic actin cytoskeleton	GO:0099181			HGNC:9091	PLS3	MGI:104807
GO:0099186	I21	BP	structural constituent of postsynapse	│ │ └─ structural constituent of postsynapse	GO:0098918	9.73245e-08	5.76995e-07	HGNC:163;HGNC:29125;HGNC:1717;HGNC:132;HGNC:144;HGNC:1461;HGNC:2696;HGNC:18957;HGNC:4272;HGNC:15474;HGNC:14295;HGNC:2903;HGNC:2900;HGNC:2516	ACTN1;DNM3;SEPTIN7;ACTB;ACTG1;CAMK2B;DBNL;MAGI2;GIT1;SHANK1;SHANK2;DLG4;DLG1;CTNND2	MGI:2137706;MGI:1341299;MGI:1335094;MGI:87904;MGI:87906;MGI:88257;MGI:700006;MGI:1354953;MGI:1927140;MGI:3613677;MGI:2671987;MGI:1277959;MGI:107231;MGI:1195966
GO:0098973	I38	BP	structural constituent of postsynaptic actin cytoskeleton	│ │ ├─ structural constituent of postsynaptic actin cytoskeleton	GO:0099186	0.00123576	0.00213683	HGNC:132;HGNC:144;HGNC:1461;HGNC:2696	ACTB;ACTG1;CAMK2B;DBNL	MGI:87904;MGI:87906;MGI:88257;MGI:700006
GO:0099184	I39	BP	structural constituent of postsynaptic intermediate filament cytoskeleton	│ │ ├─ structural constituent of postsynaptic intermediate filament cytoskeleton	GO:0099186
GO:0098879	I40	BP	structural constituent of postsynaptic specialization	│ │ ├─ structural constituent of postsynaptic specialization	GO:0099186			HGNC:18957;HGNC:4272	MAGI2;GIT1	MGI:1354953;MGI:1927140
GO:0098919	I41	BP	structural constituent of postsynaptic density	│ │ └─ structural constituent of postsynaptic density	GO:0099186	0.000661807	0.00133976	HGNC:15474;HGNC:18957;HGNC:14295;HGNC:2903;HGNC:2900;HGNC:2516	SHANK1;MAGI2;SHANK2;DLG4;DLG1;CTNND2	MGI:3613677;MGI:1354953;MGI:2671987;MGI:1277959;MGI:107231;MGI:1195966
GO:0150043	I7	BP	structural constituent of synapse-associated extracellular matrix	│ ├─ structural constituent of synapse-associated extracellular matrix	GO:0050808
GO:0099560	I8	BP	synapse adhesion between pre- and post-synapse	│ ├─ synapse adhesion between pre- and post-synapse	GO:0050808	0.0106623	0.0145077	HGNC:5951;HGNC:9681;HGNC:9668;HGNC:14291;HGNC:8008;HGNC:6139;HGNC:18957;HGNC:16835	CADM1;PTPRS;PTPRD;NLGN1;NRXN1;ITGA3;MAGI2;TAOK2	MGI:1889272;MGI:97815;MGI:97812;MGI:2179435;MGI:1096391;MGI:96602;MGI:1354953;MGI:1915919
GO:0099179	I22	BP	regulation of synaptic membrane adhesion	│ │ └─ regulation of synaptic membrane adhesion	GO:0099560			HGNC:18957;HGNC:16835	MAGI2;TAOK2	MGI:1354953;MGI:1915919
GO:0008039	I9	BP	synaptic target recognition	│ ├─ synaptic target recognition	GO:0050808			HGNC:12855	YWHAZ	MGI:109484
GO:0007416	I10	BP	synapse assembly	│ ├─ synapse assembly	GO:0050808	0.000186893	0.000455416	HGNC:5951;HGNC:244;HGNC:8008;HGNC:3084;HGNC:9246;HGNC:9247;HGNC:9668;HGNC:9681;HGNC:9861;HGNC:8127;HGNC:659;HGNC:8060;HGNC:8061;HGNC:14291;HGNC:2362;HGNC:14561;HGNC:4140;HGNC:8010;HGNC:20284	CADM1;ADD2;NRXN1;DVL1;PPFIA2;PPFIA3;PTPRD;PTPRS;RAP2A;OGT;ARF6;NUMB;NUMBL;NLGN1;CRK;ARHGEF9;GAP43;NRXN3;SIPA1L1	MGI:1889272;MGI:87919;MGI:1096391;MGI:94941;MGI:2443834;MGI:1924037;MGI:97812;MGI:97815;MGI:97855;MGI:1339639;MGI:99435;MGI:107423;MGI:894702;MGI:2179435;MGI:88508;MGI:2442233;MGI:95639;MGI:1096389;MGI:2443679
GO:0099054	I23	BP	presynapse assembly	│ │ ├─ presynapse assembly	GO:0007416	0.000865792	0.00167118	HGNC:3084;HGNC:5951;HGNC:9246;HGNC:9247;HGNC:9668;HGNC:9681;HGNC:8008	DVL1;CADM1;PPFIA2;PPFIA3;PTPRD;PTPRS;NRXN1	MGI:94941;MGI:1889272;MGI:2443834;MGI:1924037;MGI:97812;MGI:97815;MGI:1096391
GO:0051963	I24	BP	regulation of synapse assembly	│ │ ├─ regulation of synapse assembly	GO:0007416	0.173918	0.176039	HGNC:9861;HGNC:8127;HGNC:659;HGNC:8008;HGNC:8060;HGNC:8061	RAP2A;OGT;ARF6;NRXN1;NUMB;NUMBL	MGI:97855;MGI:1339639;MGI:99435;MGI:1096391;MGI:107423;MGI:894702
GO:1905606	I42	BP	regulation of presynapse assembly	│ │ │ ├─ regulation of presynapse assembly	GO:0051963			HGNC:659;HGNC:8008	ARF6;NRXN1	MGI:99435;MGI:1096391
GO:0150052	I43	BP	regulation of postsynapse assembly	│ │ │ └─ regulation of postsynapse assembly	GO:0051963			HGNC:8060;HGNC:8061	NUMB;NUMBL	MGI:107423;MGI:894702
GO:0098698	I25	BP	postsynaptic specialization assembly	│ │ ├─ postsynaptic specialization assembly	GO:0007416	0.00155454	0.0026332	HGNC:14291;HGNC:2362;HGNC:14561;HGNC:4140;HGNC:8008;HGNC:8010;HGNC:9668;HGNC:20284;HGNC:9681	NLGN1;CRK;ARHGEF9;GAP43;NRXN1;NRXN3;PTPRD;SIPA1L1;PTPRS	MGI:2179435;MGI:88508;MGI:2442233;MGI:95639;MGI:1096391;MGI:1096389;MGI:97812;MGI:2443679;MGI:97815
GO:0099150	I44	BP	regulation of postsynaptic specialization assembly	│ │ │ ├─ regulation of postsynaptic specialization assembly	GO:0098698	0.0268748	0.0309806	HGNC:14561;HGNC:4140;HGNC:8008	ARHGEF9;GAP43;NRXN1	MGI:2442233;MGI:95639;MGI:1096391
GO:0097107	I45	BP	postsynaptic density assembly	│ │ │ └─ postsynaptic density assembly	GO:0098698	0.021474	0.0258311	HGNC:8010;HGNC:9668;HGNC:20284;HGNC:9681;HGNC:8008	NRXN3;PTPRD;SIPA1L1;PTPRS;NRXN1	MGI:1096389;MGI:97812;MGI:2443679;MGI:97815;MGI:1096391
GO:0099151	I48	BP	regulation of postsynaptic density assembly	│ │ │ └─ regulation of postsynaptic density assembly	GO:0097107	0.0311426	0.0349303	HGNC:9668;HGNC:20284;HGNC:9681;HGNC:8008	PTPRD;SIPA1L1;PTPRS;NRXN1	MGI:97812;MGI:2443679;MGI:97815;MGI:1096391
GO:0097104	I26	BP	postsynaptic membrane assembly	│ │ └─ postsynaptic membrane assembly	GO:0007416
GO:0098883	I11	BP	synapse disassembly	│ ├─ synapse disassembly	GO:0050808			HGNC:3388;HGNC:1774	EPHA4;CDK5	MGI:98277;MGI:101765
GO:1905806	I27	BP	regulation of synapse disassembly	│ │ └─ regulation of synapse disassembly	GO:0098883			HGNC:1774;HGNC:3388	CDK5;EPHA4	MGI:101765;MGI:98277
GO:0060074	I12	BP	synapse maturation	│ ├─ synapse maturation	GO:0050808	0.00378356	0.00570974	HGNC:8881;HGNC:8590;HGNC:8592;HGNC:12855;HGNC:1461;HGNC:10252	PFN1;PAK1;PAK3;YWHAZ;CAMK2B;ROCK2	MGI:97549;MGI:1339975;MGI:1339656;MGI:109484;MGI:88257;MGI:107926
GO:0090128	I28	BP	regulation of synapse maturation	│ │ └─ regulation of synapse maturation	GO:0060074	0.00780796	0.0111735	HGNC:8590;HGNC:8592;HGNC:12855;HGNC:1461;HGNC:10252	PAK1;PAK3;YWHAZ;CAMK2B;ROCK2	MGI:1339975;MGI:1339656;MGI:109484;MGI:88257;MGI:107926
GO:0099558	I13	BP	maintenance of synapse structure	│ ├─ maintenance of synapse structure	GO:0050808	0.0179911	0.0226252	HGNC:9102;HGNC:24035;HGNC:5951;HGNC:5241;HGNC:659	PLXNA4;APPL1;CADM1;HSPA8;ARF6	MGI:2179061;MGI:1920243;MGI:1889272;MGI:105384;MGI:99435
GO:0099559	I29	BP	maintenance of alignment of postsynaptic density and presynaptic active zone	│ │ ├─ maintenance of alignment of postsynaptic density and presynaptic active zone	GO:0099558
GO:0098880	I30	BP	maintenance of postsynaptic specialization structure	│ │ └─ maintenance of postsynaptic specialization structure	GO:0099558	0.0444724	0.0479378	HGNC:5951;HGNC:5241;HGNC:659	CADM1;HSPA8;ARF6	MGI:1889272;MGI:105384;MGI:99435
GO:0099562	I46	BP	maintenance of postsynaptic density structure	│ │ └─ maintenance of postsynaptic density structure	GO:0098880			HGNC:659	ARF6	MGI:99435
GO:0099187	I14	BP	presynaptic cytoskeleton organization	│ ├─ presynaptic cytoskeleton organization	GO:0050808			HGNC:24011;HGNC:20039	ABI2;CAP2	MGI:106913;MGI:1914502
GO:0099140	I31	BP	presynaptic actin cytoskeleton organization	│ │ └─ presynaptic actin cytoskeleton organization	GO:0099187			HGNC:24011;HGNC:20039	ABI2;CAP2	MGI:106913;MGI:1914502
GO:0099188	I15	BP	postsynaptic cytoskeleton organization	│ └─ postsynaptic cytoskeleton organization	GO:0050808	0.000359315		HGNC:24011;HGNC:10252;HGNC:20284;HGNC:2695;HGNC:9801;HGNC:7568;HGNC:10831;HGNC:2696;HGNC:2319	ABI2;ROCK2;SIPA1L1;DBN1;RAC1;MYH10;SH3GL2;DBNL;CPNE6	MGI:106913;MGI:107926;MGI:2443679;MGI:1931838;MGI:97845;MGI:1930780;MGI:700009;MGI:700006;MGI:1334445
GO:0098974	I32	BP	postsynaptic actin cytoskeleton organization	│ ├─ postsynaptic actin cytoskeleton organization	GO:0099188	0.000125762	0.000336718	HGNC:24011;HGNC:10252;HGNC:20284;HGNC:2695;HGNC:9801;HGNC:7568;HGNC:10831;HGNC:2696;HGNC:2319	ABI2;ROCK2;SIPA1L1;DBN1;RAC1;MYH10;SH3GL2;DBNL;CPNE6	MGI:106913;MGI:107926;MGI:2443679;MGI:1931838;MGI:97845;MGI:1930780;MGI:700009;MGI:700006;MGI:1334445
GO:0099190	I33	BP	postsynaptic spectrin-associated cytoskeleton organization	│ └─ postsynaptic spectrin-associated cytoskeleton organization	GO:0099188
SYNGO:metabolism	J1	BP	metabolism	├─ metabolism	SYNGO:synprocess	0.0559813	0.0595698	HGNC:31399;HGNC:11054;HGNC:4141;HGNC:7727;HGNC:12631;HGNC:13581;HGNC:3942;HGNC:3287;HGNC:13759;HGNC:108;HGNC:10064;HGNC:2553	SLC6A17;SLC6A7;GAPDH;NEDD4;USP8;FBXO2;MTOR;EIF4E;CYFIP1;ACHE;TRIM3;CUL3	MGI:2442535;MGI:2147363;MGI:95640;MGI:97297;MGI:1934029;MGI:2446216;MGI:1928394;MGI:95305;MGI:1338801;MGI:87876;MGI:1860040;MGI:1347360
SYNGO:presyn_ATPmetabolic	J2	BP	ATP metabolic process in the presynapse	│ ├─ ATP metabolic process in the presynapse	SYNGO:metabolism
SYNGO:presyn_regulationATPmetabolic	J12	BP	regulation of ATP metabolic process in the presynapse	│ │ └─ regulation of ATP metabolic process in the presynapse	SYNGO:presyn_ATPmetabolic
SYNGO:postsyn_ATPmetabolic	J3	BP	ATP metabolic process in the postsynapse	│ ├─ ATP metabolic process in the postsynapse	SYNGO:metabolism			HGNC:4141	GAPDH	MGI:95640
GO:0099546	J4	BP	protein catabolic process, modulating synaptic transmission	│ ├─ protein catabolic process, modulating synaptic transmission	SYNGO:metabolism
GO:0099574	J5	BP	regulation of protein catabolic process at synapse, modulating synaptic transmission	│ ├─ regulation of protein catabolic process at synapse, modulating synaptic transmission	SYNGO:metabolism	0.0198073		HGNC:7727;HGNC:12631;HGNC:13581	NEDD4;USP8;FBXO2	MGI:97297;MGI:1934029;MGI:2446216
GO:0099576	J13	BP	regulation of protein catabolic process at postsynapse, modulating synaptic transmission	│ │ ├─ regulation of protein catabolic process at postsynapse, modulating synaptic transmission	GO:0099574	0.0139061	0.0177571	HGNC:7727;HGNC:12631;HGNC:13581	NEDD4;USP8;FBXO2	MGI:97297;MGI:1934029;MGI:2446216
GO:0099575	J14	BP	regulation of protein catabolic process at presynapse, modulating synaptic transmission	│ │ └─ regulation of protein catabolic process at presynapse, modulating synaptic transmission	GO:0099574
GO:0099547	J6	BP	regulation of translation at synapse, modulating synaptic transmission	│ ├─ regulation of translation at synapse, modulating synaptic transmission	SYNGO:metabolism	0.0268748	0.0309806	HGNC:3942;HGNC:3287;HGNC:13759	MTOR;EIF4E;CYFIP1	MGI:1928394;MGI:95305;MGI:1338801
GO:0099578	J15	BP	regulation of translation at postsynapse, modulating synaptic transmission	│ │ ├─ regulation of translation at postsynapse, modulating synaptic transmission	GO:0099547			HGNC:3287;HGNC:13759	EIF4E;CYFIP1	MGI:95305;MGI:1338801
GO:0099577	J16	BP	regulation of translation at presynapse, modulating synaptic transmission	│ │ └─ regulation of translation at presynapse, modulating synaptic transmission	GO:0099547
GO:0042135	J7	BP	neurotransmitter catabolic process	│ ├─ neurotransmitter catabolic process	SYNGO:metabolism			HGNC:108	ACHE	MGI:87876
GO:0140246	J8	BP	protein catabolic process at synapse	│ ├─ protein catabolic process at synapse	SYNGO:metabolism	0.0924643		HGNC:10064;HGNC:2553;HGNC:7727	TRIM3;CUL3;NEDD4	MGI:1860040;MGI:1347360;MGI:97297
GO:0140247	J17	BP	protein catabolic process at presynapse	│ │ ├─ protein catabolic process at presynapse	GO:0140246
GO:0140251	J21	BP	regulation protein catabolic process at presynapse	│ │ │ └─ regulation protein catabolic process at presynapse	GO:0140247
GO:0140249	J18	BP	protein catabolic process at postsynapse	│ │ └─ protein catabolic process at postsynapse	GO:0140246	0.0549444		HGNC:10064;HGNC:2553;HGNC:7727	TRIM3;CUL3;NEDD4	MGI:1860040;MGI:1347360;MGI:97297
GO:0140252	J22	BP	regulation protein catabolic process at postsynapse	│ │ └─ regulation protein catabolic process at postsynapse	GO:0140249	0.0268748	0.0309806	HGNC:10064;HGNC:2553;HGNC:7727	TRIM3;CUL3;NEDD4	MGI:1860040;MGI:1347360;MGI:97297
GO:0042136	J9	BP	neurotransmitter biosynthetic process	│ ├─ neurotransmitter biosynthetic process	SYNGO:metabolism
GO:0140241	J10	BP	translation at synapse	│ ├─ translation at synapse	SYNGO:metabolism
GO:0140236	J19	BP	translation at presynapse	│ │ ├─ translation at presynapse	GO:0140241
GO:0140242	J20	BP	translation at postsynapse	│ │ └─ translation at postsynapse	GO:0140241
GO:0140245	J23	BP	regulation of translation at postsynapse	│ │ └─ regulation of translation at postsynapse	GO:0140242
GO:0140235	J11	BP	RNA polyadenylation at postsynapse	│ └─ RNA polyadenylation at postsynapse	SYNGO:metabolism
SYNGO:transport	K1	BP	transport	└─ transport	SYNGO:synprocess	1.80556e-05	5.55042e-05	HGNC:3014;HGNC:18263;HGNC:3758;HGNC:6323;HGNC:12732;HGNC:9701;HGNC:6766;HGNC:25564;HGNC:18706;HGNC:17059;HGNC:6872;HGNC:18708;HGNC:568	DPYSL2;RAB21;FLOT2;KIF5A;WASF1;PURA;MADD;ARL8B;GRIPAP1;SACM1L;MAPK10;GRIP1;AP3D1	MGI:1349763;MGI:894308;MGI:103309;MGI:109564;MGI:1890563;MGI:103079;MGI:2444672;MGI:1914416;MGI:1859616;MGI:1933169;MGI:1346863;MGI:1921303;MGI:107734
GO:0008088	K2	BP	axo-dendritic transport	├─ axo-dendritic transport	SYNGO:transport	0.00983243	0.0136015	HGNC:18263;HGNC:3758;HGNC:6323;HGNC:12732;HGNC:9701	RAB21;FLOT2;KIF5A;WASF1;PURA	MGI:894308;MGI:103309;MGI:109564;MGI:1890563;MGI:103079
GO:0098930	K7	BP	axonal transport	│ ├─ axonal transport	GO:0008088			HGNC:18263	RAB21	MGI:894308
GO:0008089	K13	BP	anterograde axonal transport	│ │ ├─ anterograde axonal transport	GO:0098930			HGNC:18263	RAB21	MGI:894308
GO:0099641	K21	BP	anterograde axonal protein transport	│ │ │ ├─ anterograde axonal protein transport	GO:0008089
GO:0140231	K22	BP	anterograde axonal transport of neurotransmitter receptor complex	│ │ │ └─ anterograde axonal transport of neurotransmitter receptor complex	GO:0008089
GO:0099088	K14	BP	axonal transport of messenger ribonucleoprotein complex	│ │ └─ axonal transport of messenger ribonucleoprotein complex	GO:0098930
GO:0098935	K8	BP	dendritic transport	│ └─ dendritic transport	GO:0008088	0.0126753	0.0164382	HGNC:3758;HGNC:6323;HGNC:12732;HGNC:9701	FLOT2;KIF5A;WASF1;PURA	MGI:103309;MGI:109564;MGI:1890563;MGI:103079
GO:0098937	K15	BP	anterograde dendritic transport	│ ├─ anterograde dendritic transport	GO:0098935			HGNC:3758;HGNC:6323	FLOT2;KIF5A	MGI:103309;MGI:109564
GO:0098971	K23	BP	anterograde dendritic transport of neurotransmitter receptor complex	│ │ └─ anterograde dendritic transport of neurotransmitter receptor complex	GO:0098937			HGNC:6323	KIF5A	MGI:109564
GO:0098939	K16	BP	dendritic transport of mitochondrion	│ ├─ dendritic transport of mitochondrion	GO:0098935			HGNC:12732	WASF1	MGI:1890563
GO:0098961	K17	BP	dendritic transport of ribonucleoprotein complex	│ └─ dendritic transport of ribonucleoprotein complex	GO:0098935			HGNC:9701	PURA	MGI:103079
GO:0098963	K24	BP	dendritic transport of messenger ribonucleoprotein complex	│ └─ dendritic transport of messenger ribonucleoprotein complex	GO:0098961			HGNC:9701	PURA	MGI:103079
GO:0098964	K27	BP	anterograde dendritic transport of messenger ribonucleoprotein complex	│ └─ anterograde dendritic transport of messenger ribonucleoprotein complex	GO:0098963
GO:0099514	K3	BP	synaptic vesicle cytoskeletal transport	├─ synaptic vesicle cytoskeletal transport	SYNGO:transport			HGNC:6766;HGNC:25564	MADD;ARL8B	MGI:2444672;MGI:1914416
GO:0099517	K9	BP	synaptic vesicle transport along microtubule	│ └─ synaptic vesicle transport along microtubule	GO:0099514			HGNC:6766;HGNC:25564	MADD;ARL8B	MGI:2444672;MGI:1914416
GO:0048490	K18	BP	anterograde synaptic vesicle transport	│ └─ anterograde synaptic vesicle transport	GO:0099517			HGNC:6766;HGNC:25564	MADD;ARL8B	MGI:2444672;MGI:1914416
GO:1903742	K25	BP	regulation of anterograde synaptic vesicle transport	│ └─ regulation of anterograde synaptic vesicle transport	GO:0048490			HGNC:25564	ARL8B	MGI:1914416
GO:0099090	K4	BP	synaptic vesicle recycling via endosome	├─ synaptic vesicle recycling via endosome	SYNGO:transport			HGNC:18706	GRIPAP1	MGI:1859616
GO:0099158	K10	BP	regulation of recycling endosome localization within postsynapse	│ └─ regulation of recycling endosome localization within postsynapse	GO:0099090			HGNC:18706	GRIPAP1	MGI:1859616
GO:0099089	K5	BP	establishment of endoplasmic reticulum localization to postsynapse	├─ establishment of endoplasmic reticulum localization to postsynapse	SYNGO:transport
GO:0099637	K6	BP	neurotransmitter receptor transport	└─ neurotransmitter receptor transport	SYNGO:transport	0.00983243	0.0136015	HGNC:17059;HGNC:6872;HGNC:18708;HGNC:18706;HGNC:568	SACM1L;MAPK10;GRIP1;GRIPAP1;AP3D1	MGI:1933169;MGI:1346863;MGI:1921303;MGI:1859616;MGI:107734
GO:0098877	K11	BP	neurotransmitter receptor transport to plasma membrane	├─ neurotransmitter receptor transport to plasma membrane	GO:0099637	0.0311426	0.0349303	HGNC:17059;HGNC:6872;HGNC:18708;HGNC:18706	SACM1L;MAPK10;GRIP1;GRIPAP1	MGI:1933169;MGI:1346863;MGI:1921303;MGI:1859616
GO:0098969	K19	BP	neurotransmitter receptor transport to postsynaptic membrane	│ ├─ neurotransmitter receptor transport to postsynaptic membrane	GO:0098877			HGNC:17059;HGNC:6872	SACM1L;MAPK10	MGI:1933169;MGI:1346863
GO:0099639	K20	BP	neurotransmitter receptor transport, endosome to plasma membrane	│ └─ neurotransmitter receptor transport, endosome to plasma membrane	GO:0098877			HGNC:18708;HGNC:18706	GRIP1;GRIPAP1	MGI:1921303;MGI:1859616
GO:0098887	K26	BP	neurotransmitter receptor transport, endosome to postsynaptic membrane	│ └─ neurotransmitter receptor transport, endosome to postsynaptic membrane	GO:0099639			HGNC:18708;HGNC:18706	GRIP1;GRIPAP1	MGI:1921303;MGI:1859616
GO:0099152	K28	BP	regulation of neurotransmitter receptor transport, endosome to postsynaptic membrane	│ └─ regulation of neurotransmitter receptor transport, endosome to postsynaptic membrane	GO:0098887			HGNC:18706	GRIPAP1	MGI:1859616
GO:0098943	K12	BP	neurotransmitter receptor transport, postsynaptic endosome to lysosome	└─ neurotransmitter receptor transport, postsynaptic endosome to lysosome	GO:0099637			HGNC:568	AP3D1	MGI:107734

## Sheet: Annotations
your genelist input	gene hgnc_id	gene symbol	gene name	gene synonyms	GO term ID	GO term name	GO domain	SynGO annotation ID
MGI:94862	HGNC:11049	SLC6A3	solute carrier family 6 member 3	DAT,DAT1	GO:0001504	neurotransmitter uptake (GO:0001504)	BP	837
MGI:1889272	HGNC:5951	CADM1	cell adhesion molecule 1	NECL2,ST17,BL2,SYNCAM,IGSF4A,NECL-2,SYNCAM1,RA175,TSLC1,IGSF4	GO:0007416	synapse assembly (GO:0007416)	BP	1753
MGI:87919	HGNC:244	ADD2	adducin 2	ADDB	GO:0007416	synapse assembly (GO:0007416)	BP	2687
MGI:1096391	HGNC:8008	NRXN1	neurexin 1	KIAA0578,HS.22998	GO:0007416	synapse assembly (GO:0007416)	BP	4049
MGI:1333745	HGNC:17145	SNAPIN	SNAP associated protein	BLOC1S7,BORCS3,SNAPAP	GO:0008021	synaptic vesicle (GO:0008021)	CC	40
MGI:2444630	HGNC:2938	DMXL2	Dmx like 2	RC3,KIAA0856,DFNA71	GO:0008021	synaptic vesicle (GO:0008021)	CC	477
MGI:1341881	HGNC:11501	SYNGR3	synaptogyrin 3		GO:0008021	synaptic vesicle (GO:0008021)	CC	1166
MGI:891965	HGNC:14579	VPS45	vacuolar protein sorting 45 homolog	H-VPS45,H1,VPS45B,VPS45A	GO:0008021	synaptic vesicle (GO:0008021)	CC	1230
MGI:1096376	HGNC:30389	EXOC4	exocyst complex component 4	KIAA1699,MGC27170,SEC8,SEC8P,SEC8L1	GO:0008021	synaptic vesicle (GO:0008021)	CC	1237
MGI:1338759	HGNC:10700	SEC22B	SEC22 homolog B, vesicle trafficking protein	ERS-24,SEC22L1	GO:0008021	synaptic vesicle (GO:0008021)	CC	1238
MGI:1914724	HGNC:11133	SNAP29	synaptosome associated protein 29	SNAP-29,CEDNIK	GO:0008021	synaptic vesicle (GO:0008021)	CC	3645
MGI:1860197	HGNC:13490	WDR7	WD repeat domain 7	KIAA0541,TRAG	GO:0008021	synaptic vesicle (GO:0008021)	CC	3960
MGI:894645	HGNC:9394	PICK1	protein interacting with PRKCA 1	DJ1039K5,MGC15204,PRKCABP	GO:0008021	synaptic vesicle (GO:0008021)	CC	4161
MGI:2443834	HGNC:9246	PPFIA2	PTPRF interacting protein alpha 2		GO:0008021	synaptic vesicle (GO:0008021)	CC	4185
MGI:109484	HGNC:12855	YWHAZ	tyrosine 3-monooxygenase/tryptophan 5-monooxygenase activation protein zeta	KCIP-1,14-3-3-ZETA,YWHAD	GO:0008039	synaptic target recognition (GO:0008039)	BP	2352
MGI:894308	HGNC:18263	RAB21	RAB21, member RAS oncogene family	KIAA0118	GO:0008089	anterograde axonal transport (GO:0008089)	BP	2391
MGI:104563	HGNC:7641	NAPA	NSF attachment protein alpha		GO:0010807	regulation of synaptic vesicle priming (GO:0010807)	BP	716
MGI:104562	HGNC:15751	NAPB	NSF attachment protein beta	SNAP-BETA,SNAPB	GO:0010807	regulation of synaptic vesicle priming (GO:0010807)	BP	717
MGI:1339975	HGNC:8590	PAK1	p21 (RAC1) activated kinase 1		GO:0014069	postsynaptic density (GO:0014069)	CC	500
MGI:1339656	HGNC:8592	PAK3	p21 (RAC1) activated kinase 3	HPAK3,BPAK,MRX30,MRX47	GO:0014069	postsynaptic density (GO:0014069)	CC	502
MGI:2671987	HGNC:14295	SHANK2	SH3 and multiple ankyrin repeat domains 2	CTTNBP1,PROSAP1,SHANK,SPANK-3,CORTBP1	GO:0014069	postsynaptic density (GO:0014069)	CC	522
MGI:3613677	HGNC:15474	SHANK1	SH3 and multiple ankyrin repeat domains 1	SSTRIP,SPANK-1,SYNAMON	GO:0014069	postsynaptic density (GO:0014069)	CC	532
MGI:1354953	HGNC:18957	MAGI2	membrane associated guanylate kinase, WW and PDZ domain containing 2	AIP1,ARIP1,KIAA0705,ACVRIP1,MAGI-2	GO:0014069	postsynaptic density (GO:0014069)	CC	541
MGI:103560	HGNC:6394	KPNA1	karyopherin subunit alpha 1	SRP1,RCH2,NPI-1,IPOA5	GO:0014069	postsynaptic density (GO:0014069)	CC	684
MGI:1924781	HGNC:24600	ANKS1B	ankyrin repeat and sterile alpha motif domain containing 1B	EB-1,AIDA-1,CAJALIN-2,ANKS2	GO:0014069	postsynaptic density (GO:0014069)	CC	755
MGI:2142523	HGNC:16062	CRTC1	CREB regulated transcription coactivator 1	KIAA0616,FLJ14027,TORC1,MECT1	GO:0014069	postsynaptic density (GO:0014069)	CC	758
MGI:103038	HGNC:11364	STAT3	signal transducer and activator of transcription 3	APRF	GO:0014069	postsynaptic density (GO:0014069)	CC	838
MGI:88257	HGNC:1461	CAMK2B	calcium/calmodulin dependent protein kinase II beta	CAM2,CAMK2,CAMKIIΒ,CAMKB	GO:0014069	postsynaptic density (GO:0014069)	CC	888
MGI:88256	HGNC:1460	CAMK2A	calcium/calmodulin dependent protein kinase II alpha	KIAA0968,CAMKIINALPHA,CAMKIIΑ,CAMKA	GO:0014069	postsynaptic density (GO:0014069)	CC	889
MGI:104684	HGNC:3420	EPS8	epidermal growth factor receptor pathway substrate 8		GO:0014069	postsynaptic density (GO:0014069)	CC	929
MGI:1098535	HGNC:1459	CAMK1	calcium/calmodulin dependent protein kinase I	CAMKI,CAMKI-ALPHA	GO:0014069	postsynaptic density (GO:0014069)	CC	979
MGI:1915347	HGNC:24596	DYNLL2	dynein light chain LC8-type 2	MGC17810,DLC2,DNCL1B,RSPH22	GO:0014069	postsynaptic density (GO:0014069)	CC	983
MGI:1195966	HGNC:2516	CTNND2	catenin delta 2	NPRAP,GT24	GO:0014069	postsynaptic density (GO:0014069)	CC	1038
MGI:1346858	HGNC:6871	MAPK1	mitogen-activated protein kinase 1	ERK,ERK2,P41MAPK,MAPK2,PRKM2,PRKM1	GO:0014069	postsynaptic density (GO:0014069)	CC	1137
MGI:1346866	HGNC:6840	MAP2K1	mitogen-activated protein kinase kinase 1	MEK1,MAPKK1,PRKMK1	GO:0014069	postsynaptic density (GO:0014069)	CC	1143
MGI:104684	HGNC:3420	EPS8	epidermal growth factor receptor pathway substrate 8		GO:0014069	postsynaptic density (GO:0014069)	CC	1670
MGI:1915076	HGNC:30669	SNAP47	synaptosome associated protein 47	SVAP1,SNAP-47,C1ORF142	GO:0014069	postsynaptic density (GO:0014069)	CC	1690
MGI:1861437	HGNC:4617	GSK3B	glycogen synthase kinase 3 beta		GO:0014069	postsynaptic density (GO:0014069)	CC	1787
MGI:1929183	HGNC:12362	TSC1	TSC complex subunit 1	KIAA0243,LAM,HAMARTIN,TSC	GO:0014069	postsynaptic density (GO:0014069)	CC	1853
MGI:108202	HGNC:8648	PCBP2	poly(rC) binding protein 2	HNRPE2,HNRNP-E2,HNRNPE2	GO:0014069	postsynaptic density (GO:0014069)	CC	1870
MGI:1345635	HGNC:8647	PCBP1	poly(rC) binding protein 1	HNRPE1,HNRNP-E1,HNRPX,HNRNP-X	GO:0014069	postsynaptic density (GO:0014069)	CC	1877
MGI:103079	HGNC:9701	PURA	purine rich element binding protein A	PURALPHA,PUR1,PUR-ALPHA	GO:0014069	postsynaptic density (GO:0014069)	CC	1878
MGI:1917171	HGNC:24941	HNRNPA3	heterogeneous nuclear ribonucleoprotein A3	HNRPA3	GO:0014069	postsynaptic density (GO:0014069)	CC	1881
MGI:97912	HGNC:10011	RHEB	Ras homolog, mTORC1 binding	RHEB2	GO:0014069	postsynaptic density (GO:0014069)	CC	1895
MGI:1931838	HGNC:2695	DBN1	drebrin 1	D0S117E	GO:0014069	postsynaptic density (GO:0014069)	CC	1964
MGI:1934029	HGNC:12631	USP8	ubiquitin specific peptidase 8	HUMORF8,KIAA0055,UBPY,SPG59	GO:0014069	postsynaptic density (GO:0014069)	CC	2092
MGI:105384	HGNC:5241	HSPA8	heat shock protein family A (Hsp70) member 8	HSC71,HSC70,HSP73,HSPA10	GO:0014069	postsynaptic density (GO:0014069)	CC	2201
MGI:1921303	HGNC:18708	GRIP1	glutamate receptor interacting protein 1		GO:0014069	postsynaptic density (GO:0014069)	CC	2231
MGI:104652	HGNC:1491	CAPZB	capping actin protein of muscle Z-line subunit beta		GO:0014069	postsynaptic density (GO:0014069)	CC	2315
MGI:102548	HGNC:12363	TSC2	TSC complex subunit 2	TUBERIN,LAM,PPP1R160,TSC4	GO:0014069	postsynaptic density (GO:0014069)	CC	2416
MGI:1917723	HGNC:16626	RAPGEF4	Rap guanine nucleotide exchange factor 4	CAMP-GEFII,CGEF2	GO:0014069	postsynaptic density (GO:0014069)	CC	2482
MGI:1195966	HGNC:2516	CTNND2	catenin delta 2	NPRAP,GT24	GO:0014069	postsynaptic density (GO:0014069)	CC	2485
MGI:94941	HGNC:3084	DVL1	dishevelled segment polarity protein 1		GO:0014069	postsynaptic density (GO:0014069)	CC	2813
MGI:107423	HGNC:8060	NUMB	NUMB endocytic adaptor protein	C14ORF41	GO:0014069	postsynaptic density (GO:0014069)	CC	2863
MGI:105384	HGNC:5241	HSPA8	heat shock protein family A (Hsp70) member 8	HSC71,HSC70,HSP73,HSPA10	GO:0014069	postsynaptic density (GO:0014069)	CC	2884
MGI:1298224	HGNC:8996	PIP5K1C	phosphatidylinositol-4-phosphate 5-kinase type 1 gamma	PIP5KGAMMA,KIAA0589,LCCS3	GO:0014069	postsynaptic density (GO:0014069)	CC	2904
MGI:87940	HGNC:289	GRK2	G protein-coupled receptor kinase 2	BARK1,ADRBK1	GO:0014069	postsynaptic density (GO:0014069)	CC	3064
MGI:87941	HGNC:290	GRK3	G protein-coupled receptor kinase 3	BARK2,ADRBK2	GO:0014069	postsynaptic density (GO:0014069)	CC	3066
MGI:2183446	HGNC:16923	AGAP3	ArfGAP with GTPase domain, ankyrin repeat and PH domain 3	CENTG3	GO:0014069	postsynaptic density (GO:0014069)	CC	3835
MGI:99257	HGNC:3277	EIF3E	eukaryotic translation initiation factor 3 subunit E	EIF3-P48,INT6,EIF3S6	GO:0014069	postsynaptic density (GO:0014069)	CC	3885
MGI:1917171	HGNC:24941	HNRNPA3	heterogeneous nuclear ribonucleoprotein A3	HNRPA3	GO:0014069	postsynaptic density (GO:0014069)	CC	3899
MGI:98331	HGNC:11132	SNAP25	synaptosome associated protein 25	SNAP-25,RIC-4,RIC4,SEC9,BA416N4.2,DJ1068F16.2,SNAP	GO:0016079	synaptic vesicle exocytosis (GO:0016079)	BP	39
MGI:98331	HGNC:11132	SNAP25	synaptosome associated protein 25	SNAP-25,RIC-4,RIC4,SEC9,BA416N4.2,DJ1068F16.2,SNAP	GO:0016079	synaptic vesicle exocytosis (GO:0016079)	BP	275
MGI:1313277	HGNC:12643	VAMP2	vesicle associated membrane protein 2	VAMP-2,SYB2	GO:0016079	synaptic vesicle exocytosis (GO:0016079)	BP	291
MGI:109355	HGNC:11433	STX1A	syntaxin 1A	HPC-1,P35-1,STX1	GO:0016079	synaptic vesicle exocytosis (GO:0016079)	BP	1160
MGI:109355	HGNC:11433	STX1A	syntaxin 1A	HPC-1,P35-1,STX1	GO:0016079	synaptic vesicle exocytosis (GO:0016079)	BP	1247
MGI:1930705	HGNC:18539	STX1B	syntaxin 1B	STX1B1,STX1B2	GO:0016079	synaptic vesicle exocytosis (GO:0016079)	BP	1248
MGI:1924037	HGNC:9247	PPFIA3	PTPRF interacting protein alpha 3	KIAA0654,LPNA3,MGC126567,MGC126569	GO:0016079	synaptic vesicle exocytosis (GO:0016079)	BP	2737
MGI:2152971	HGNC:17282	RIMS1	regulating synaptic membrane exocytosis 1	RIM,KIAA0340,RIM1,RAB3IP2,CORD7	GO:0016081	synaptic vesicle docking (GO:0016081)	BP	62
MGI:1313277	HGNC:12643	VAMP2	vesicle associated membrane protein 2	VAMP-2,SYB2	GO:0016081	synaptic vesicle docking (GO:0016081)	BP	265
MGI:1924037	HGNC:9247	PPFIA3	PTPRF interacting protein alpha 3	KIAA0654,LPNA3,MGC126567,MGC126569	GO:0016081	synaptic vesicle docking (GO:0016081)	BP	2738
MGI:104563	HGNC:7641	NAPA	NSF attachment protein alpha		GO:0016082	synaptic vesicle priming (GO:0016082)	BP	35
MGI:2152971	HGNC:17282	RIMS1	regulating synaptic membrane exocytosis 1	RIM,KIAA0340,RIM1,RAB3IP2,CORD7	GO:0016082	synaptic vesicle priming (GO:0016082)	BP	61
MGI:107363	HGNC:11444	STXBP1	syntaxin binding protein 1	HUNC18,MUNC18-1,UNC18,RBSEC1	GO:0016082	synaptic vesicle priming (GO:0016082)	BP	82
MGI:1927139	HGNC:20566	SV2A	synaptic vesicle glycoprotein 2A	SV2,KIAA0736	GO:0016082	synaptic vesicle priming (GO:0016082)	BP	162
MGI:2151013	HGNC:17072	ERC1	ELKS/RAB6-interacting/CAST family member 1	ELKS,KIAA1081,CAST2,MGC12974,RAB6IP2	GO:0016082	synaptic vesicle priming (GO:0016082)	BP	331
MGI:1098749	HGNC:31922	ERC2	ELKS/RAB6-interacting/CAST family member 2	CAST,CAST1,KIAA0378,SPBC110,SPC110,ELKSL	GO:0016082	synaptic vesicle priming (GO:0016082)	BP	332
MGI:1350922	HGNC:1426	CADPS	calcium dependent secretion activator	CAPS,KIAA1121,CAPS1,UNC-31	GO:0016082	synaptic vesicle priming (GO:0016082)	BP	494
MGI:2443963	HGNC:16018	CADPS2	calcium dependent secretion activator 2	CAPS2	GO:0016082	synaptic vesicle priming (GO:0016082)	BP	558
MGI:102788	HGNC:17056	RPH3A	rabphilin 3A	KIAA0985,RABPHILIN,EXOPHILIN-1	GO:0016082	synaptic vesicle priming (GO:0016082)	BP	1403
MGI:2152971	HGNC:17282	RIMS1	regulating synaptic membrane exocytosis 1	RIM,KIAA0340,RIM1,RAB3IP2,CORD7	GO:0016082	synaptic vesicle priming (GO:0016082)	BP	3738
MGI:1098749	HGNC:31922	ERC2	ELKS/RAB6-interacting/CAST family member 2	CAST,CAST1,KIAA0378,SPBC110,SPC110,ELKSL	GO:0016082	synaptic vesicle priming (GO:0016082)	BP	3740
MGI:107734	HGNC:568	AP3D1	adaptor related protein complex 3 subunit delta 1	ADTD	GO:0016182	synaptic vesicle budding from endosome (GO:0016182)	BP	1282
MGI:101919	HGNC:555	AP1G1	adaptor related protein complex 1 subunit gamma 1	CLAPG1,ADTG	GO:0016182	synaptic vesicle budding from endosome (GO:0016182)	BP	2104
MGI:107734	HGNC:568	AP3D1	adaptor related protein complex 3 subunit delta 1	ADTD	GO:0016182	synaptic vesicle budding from endosome (GO:0016182)	BP	2198
MGI:1354961	HGNC:11503	SYNJ1	synaptojanin 1	INPP5G,PARK20	GO:0016191	synaptic vesicle uncoating (GO:0016191)	BP	701
MGI:105384	HGNC:5241	HSPA8	heat shock protein family A (Hsp70) member 8	HSC71,HSC70,HSP73,HSPA10	GO:0016191	synaptic vesicle uncoating (GO:0016191)	BP	1014
MGI:1919935	HGNC:15469	DNAJC6	DnaJ heat shock protein family (Hsp40) member C6	KIAA0473,PARK19	GO:0016191	synaptic vesicle uncoating (GO:0016191)	BP	2115
MGI:1313277	HGNC:12643	VAMP2	vesicle associated membrane protein 2	VAMP-2,SYB2	GO:0030285	integral component of synaptic vesicle membrane (GO:0030285)	CC	290
MGI:1349480	HGNC:10563	SCAMP1	secretory carrier membrane protein 1	SCAMP37	GO:0030285	integral component of synaptic vesicle membrane (GO:0030285)	CC	303
MGI:1096399	HGNC:11486	VAMP7	vesicle associated membrane protein 7	VAMP-7,TI-VAMP,SYBL1	GO:0030285	integral component of synaptic vesicle membrane (GO:0030285)	CC	319
MGI:3606480	HGNC:22980	SLC10A4	solute carrier family 10 member 4	MGC29802	GO:0030285	integral component of synaptic vesicle membrane (GO:0030285)	CC	355
MGI:106677	HGNC:10935	SLC18A2	solute carrier family 18 member A2	SVMT,SVAT,VMAT2	GO:0030285	integral component of synaptic vesicle membrane (GO:0030285)	CC	474
MGI:1349480	HGNC:10563	SCAMP1	secretory carrier membrane protein 1	SCAMP37	GO:0030285	integral component of synaptic vesicle membrane (GO:0030285)	CC	573
MGI:2442535	HGNC:31399	SLC6A17	solute carrier family 6 member 17		GO:0030285	integral component of synaptic vesicle membrane (GO:0030285)	CC	660
MGI:2147363	HGNC:11054	SLC6A7	solute carrier family 6 member 7	PROT	GO:0030285	integral component of synaptic vesicle membrane (GO:0030285)	CC	779
MGI:108081	HGNC:11507	SYPL1	synaptophysin like 1	SYPL	GO:0030285	integral component of synaptic vesicle membrane (GO:0030285)	CC	918
MGI:98467	HGNC:11506	SYP	synaptophysin	MRX96	GO:0030285	integral component of synaptic vesicle membrane (GO:0030285)	CC	1136
MGI:109355	HGNC:11433	STX1A	syntaxin 1A	HPC-1,P35-1,STX1	GO:0030285	integral component of synaptic vesicle membrane (GO:0030285)	CC	1162
MGI:1328323	HGNC:11498	SYNGR1	synaptogyrin 1		GO:0030285	integral component of synaptic vesicle membrane (GO:0030285)	CC	1164
MGI:2147363	HGNC:11054	SLC6A7	solute carrier family 6 member 7	PROT	GO:0030285	integral component of synaptic vesicle membrane (GO:0030285)	CC	1173
MGI:107418	HGNC:9677	PTPRN2	protein tyrosine phosphatase receptor type N2	KIAA0387,PHOGRIN,ICAAR,IA-2BETA	GO:0030285	integral component of synaptic vesicle membrane (GO:0030285)	CC	1229
MGI:1927338	HGNC:16874	SV2B	synaptic vesicle glycoprotein 2B	KIAA0735,HST19680	GO:0030285	integral component of synaptic vesicle membrane (GO:0030285)	CC	1234
MGI:1927139	HGNC:20566	SV2A	synaptic vesicle glycoprotein 2A	SV2,KIAA0736	GO:0030285	integral component of synaptic vesicle membrane (GO:0030285)	CC	1235
MGI:1922459	HGNC:30670	SV2C	synaptic vesicle glycoprotein 2C		GO:0030285	integral component of synaptic vesicle membrane (GO:0030285)	CC	1236
MGI:1923396	HGNC:11431	STX16	syntaxin 16	HSYN16,SYN16	GO:0030285	integral component of synaptic vesicle membrane (GO:0030285)	CC	1239
MGI:1858210	HGNC:11442	STX7	syntaxin 7		GO:0030285	integral component of synaptic vesicle membrane (GO:0030285)	CC	1241
MGI:109355	HGNC:11433	STX1A	syntaxin 1A	HPC-1,P35-1,STX1	GO:0030285	integral component of synaptic vesicle membrane (GO:0030285)	CC	1246
MGI:99667	HGNC:11509	SYT1	synaptotagmin 1	P65,SYT,SVP65	GO:0030285	integral component of synaptic vesicle membrane (GO:0030285)	CC	1609
MGI:1915916	HGNC:25417	SVOP	SV2 related protein	DKFZP761H039	GO:0030285	integral component of synaptic vesicle membrane (GO:0030285)	CC	3728
MGI:109355	HGNC:11433	STX1A	syntaxin 1A	HPC-1,P35-1,STX1	GO:0030285	integral component of synaptic vesicle membrane (GO:0030285)	CC	3789
MGI:1927338	HGNC:16874	SV2B	synaptic vesicle glycoprotein 2B	KIAA0735,HST19680	GO:0030285	integral component of synaptic vesicle membrane (GO:0030285)	CC	3947
MGI:1328323	HGNC:11498	SYNGR1	synaptogyrin 1		GO:0030285	integral component of synaptic vesicle membrane (GO:0030285)	CC	3966
MGI:1313277	HGNC:12643	VAMP2	vesicle associated membrane protein 2	VAMP-2,SYB2	GO:0030285	integral component of synaptic vesicle membrane (GO:0030285)	CC	4167
MGI:1201778	HGNC:13724	ATP6V0D1	ATPase H+ transporting V0 subunit d1	ATP6DV,VATX,VPATPD,P39,VMA6,ATP6D	GO:0030285	integral component of synaptic vesicle membrane (GO:0030285)	CC	4497
MGI:103286	HGNC:865	ATP6V0A1	ATPase H+ transporting V0 subunit a1	A1,VPH1,STV1,VPP1,ATP6N1,ATP6N1A	GO:0030285	integral component of synaptic vesicle membrane (GO:0030285)	CC	4503
MGI:1277151	HGNC:11138	SNCA	synuclein alpha	NACP,PD1,PARK1,PARK4	GO:0030672	synaptic vesicle membrane (GO:0030672)	CC	1047
MGI:1921256	HGNC:2973	DNM1L	dynamin 1 like	DRP1,DVLP,HDYNIV,DYMPLE,VPS1	GO:0030672	synaptic vesicle membrane (GO:0030672)	CC	1796
MGI:894297	HGNC:2090	CLTA	clathrin light chain A	LCA	GO:0030672	synaptic vesicle membrane (GO:0030672)	CC	2078
MGI:1921575	HGNC:2091	CLTB	clathrin light chain B	LCB	GO:0030672	synaptic vesicle membrane (GO:0030672)	CC	2079
MGI:700009	HGNC:10831	SH3GL2	SH3 domain containing GRB2 like 2, endophilin A1	SH3P4,SH3D2A,CNSA2,EEN-B1	GO:0030672	synaptic vesicle membrane (GO:0030672)	CC	2898
MGI:1930705	HGNC:18539	STX1B	syntaxin 1B	STX1B1,STX1B2	GO:0031629	synaptic vesicle fusion to presynaptic active zone membrane (GO:0031629)	BP	1623
MGI:97843	HGNC:9777	RAB3A	RAB3A, member RAS oncogene family		GO:0031630	regulation of synaptic vesicle fusion to presynaptic active zone membrane (GO:0031630)	BP	50
MGI:104727	HGNC:2309	CPLX1	complexin 1	CPX-I	GO:0031630	regulation of synaptic vesicle fusion to presynaptic active zone membrane (GO:0031630)	BP	575
MGI:104726	HGNC:2310	CPLX2	complexin 2	CPX-2,DKFZP547D155	GO:0031630	regulation of synaptic vesicle fusion to presynaptic active zone membrane (GO:0031630)	BP	576
MGI:2151013	HGNC:17072	ERC1	ELKS/RAB6-interacting/CAST family member 1	ELKS,KIAA1081,CAST2,MGC12974,RAB6IP2	GO:0031630	regulation of synaptic vesicle fusion to presynaptic active zone membrane (GO:0031630)	BP	4121
MGI:1098749	HGNC:31922	ERC2	ELKS/RAB6-interacting/CAST family member 2	CAST,CAST1,KIAA0378,SPBC110,SPC110,ELKSL	GO:0031630	regulation of synaptic vesicle fusion to presynaptic active zone membrane (GO:0031630)	BP	4121
MGI:87876	HGNC:108	ACHE	acetylcholinesterase (Cartwright blood group)	YT	GO:0042135	neurotransmitter catabolic process (GO:0042135)	BP	2109
MGI:1335094	HGNC:1717	SEPTIN7	septin 7	CDC3,SEPT7A,CDC10,SEPT7	GO:0042734	presynaptic membrane (GO:0042734)	CC	1028
MGI:105368	HGNC:815	ATP2B2	ATPase plasma membrane Ca2+ transporting 2	PMCA2	GO:0042734	presynaptic membrane (GO:0042734)	CC	4088
MGI:1916267	HGNC:30500	PRRT2	proline rich transmembrane protein 2	FLJ25513,DKFZP547J199,IFITMD1,FICCA,DSPB3,PKC,EKD1,ICCA,DYT10	GO:0042734	presynaptic membrane (GO:0042734)	CC	4108
MGI:2443834	HGNC:9246	PPFIA2	PTPRF interacting protein alpha 2		GO:0042734	presynaptic membrane (GO:0042734)	CC	4184
MGI:87876	HGNC:108	ACHE	acetylcholinesterase (Cartwright blood group)	YT	GO:0043083	synaptic cleft (GO:0043083)	CC	2130
MGI:2442087	HGNC:18583	PPM1H	protein phosphatase, Mg2+/Mn2+ dependent 1H	KIAA1157,FLJ13253,NERPP-2C,ARHCL1	GO:0045202	synapse (GO:0045202)	CC	64
MGI:1923558	HGNC:18370	RAB1B	RAB1B, member RAS oncogene family		GO:0045202	synapse (GO:0045202)	CC	207
MGI:894308	HGNC:18263	RAB21	RAB21, member RAS oncogene family	KIAA0118	GO:0045202	synapse (GO:0045202)	CC	244
MGI:102790	HGNC:14244	RAB18	RAB18, member RAS oncogene family		GO:0045202	synapse (GO:0045202)	CC	246
MGI:103309	HGNC:3758	FLOT2	flotillin 2	ESA,ESA1,ECS-1,ECS1,M17S1	GO:0045202	synapse (GO:0045202)	CC	263
MGI:107172	HGNC:9317	PPP3R1	protein phosphatase 3 regulatory subunit B, alpha	CALNB1,CNB,CNB1	GO:0045202	synapse (GO:0045202)	CC	271
MGI:1924134	HGNC:13760	CYFIP2	cytoplasmic FMR1 interacting protein 2	PIR121	GO:0045202	synapse (GO:0045202)	CC	433
MGI:97759	HGNC:9390	PRKAR1B	protein kinase cAMP-dependent type I regulatory subunit beta		GO:0045202	synapse (GO:0045202)	CC	443
MGI:99919	HGNC:12666	VCP	valosin containing protein	IBMPFD,P97,CDC48,TERA	GO:0045202	synapse (GO:0045202)	CC	483
MGI:99919	HGNC:12666	VCP	valosin containing protein	IBMPFD,P97,CDC48,TERA	GO:0045202	synapse (GO:0045202)	CC	485
MGI:1923484	HGNC:29647	MAGI3	membrane associated guanylate kinase, WW and PDZ domain containing 3	MAGI-3	GO:0045202	synapse (GO:0045202)	CC	540
MGI:1349722	HGNC:8554	PABPC1	poly(A) binding protein cytoplasmic 1	PABP1,PABPL1,PAB1,PABPC2	GO:0045202	synapse (GO:0045202)	CC	565
MGI:106248	HGNC:3300	EIF5A	eukaryotic translation initiation factor 5A	EIF5A1,EIF-5A,MGC99547,MGC104255	GO:0045202	synapse (GO:0045202)	CC	595
MGI:1913906	HGNC:3211	EEF1D	eukaryotic translation elongation factor 1 delta	EF-1D,FLJ20897	GO:0045202	synapse (GO:0045202)	CC	596
MGI:95299	HGNC:3265	EIF2S1	eukaryotic translation initiation factor 2 subunit alpha	EIF-2ALPHA,EIF2A,EIF2	GO:0045202	synapse (GO:0045202)	CC	600
MGI:1915661	HGNC:6838	MAP1LC3A	microtubule associated protein 1 light chain 3 alpha	MAP1BLC3,MAP1ALC3,LC3,LC3A,ATG8E	GO:0045202	synapse (GO:0045202)	CC	642
MGI:1889007	HGNC:13476	TTYH1	tweety family member 1		GO:0045202	synapse (GO:0045202)	CC	643
MGI:108092	HGNC:1052	BIN1	bridging integrator 1	SH3P9,AMPH2,AMPHL	GO:0045202	synapse (GO:0045202)	CC	646
MGI:95541	HGNC:3711	FKBP1A	FKBP prolyl isomerase 1A	FKBP-12,FKBP12,PKC12,PPIASE,FKBP12C,FKBP1	GO:0045202	synapse (GO:0045202)	CC	650
MGI:104561	HGNC:7642	NAPG	NSF attachment protein gamma		GO:0045202	synapse (GO:0045202)	CC	720
MGI:107749	HGNC:12005	TPD52	tumor protein D52	D52,HD52,N8L	GO:0045202	synapse (GO:0045202)	CC	732
MGI:102889	HGNC:2464	VCAN	versican	PG-M,CSPG2	GO:0045202	synapse (GO:0045202)	CC	782
MGI:1921442	HGNC:23366	ARPC5L	actin related protein 2/3 complex subunit 5 like	MGC3038,ARC16-2	GO:0045202	synapse (GO:0045202)	CC	805
MGI:102548	HGNC:12363	TSC2	TSC complex subunit 2	TUBERIN,LAM,PPP1R160,TSC4	GO:0045202	synapse (GO:0045202)	CC	907
MGI:2443834	HGNC:9246	PPFIA2	PTPRF interacting protein alpha 2		GO:0045202	synapse (GO:0045202)	CC	931
MGI:1924037	HGNC:9247	PPFIA3	PTPRF interacting protein alpha 3	KIAA0654,LPNA3,MGC126567,MGC126569	GO:0045202	synapse (GO:0045202)	CC	932
MGI:2135609	HGNC:17787	LIN7A	lin-7 homolog A, crumbs cell polarity complex component	MALS-1,TIP-33,LIN-7A,VELI1	GO:0045202	synapse (GO:0045202)	CC	951
MGI:1926334	HGNC:9302	PPP2R1A	protein phosphatase 2 scaffold subunit Aalpha	PR65A,PP2A-AALPHA,PP2AA	GO:0045202	synapse (GO:0045202)	CC	970
MGI:107164	HGNC:9314	PPP3CA	protein phosphatase 3 catalytic subunit alpha	CNA1,PPP2B,CALN,CALNA	GO:0045202	synapse (GO:0045202)	CC	1062
MGI:107163	HGNC:9315	PPP3CB	protein phosphatase 3 catalytic subunit beta	CALNA2,CNA2,PP2BBETA,CALNB	GO:0045202	synapse (GO:0045202)	CC	1063
MGI:101914	HGNC:1435	CALB2	calbindin 2	CAL2	GO:0045202	synapse (GO:0045202)	CC	1072
MGI:99845	HGNC:4227	GDI2	GDP dissociation inhibitor 2	RABGDIB	GO:0045202	synapse (GO:0045202)	CC	1630
MGI:96955	HGNC:11026	SLC3A2	solute carrier family 3 member 2	4T2HC,4F2,NACAE,CD98,CD98HC,4F2HC,MDU1	GO:0045202	synapse (GO:0045202)	CC	1649
MGI:1929955	HGNC:380	AKR1A1	aldo-keto reductase family 1 member A1	ALR,DD3	GO:0045202	synapse (GO:0045202)	CC	1651
MGI:1349762	HGNC:3015	DPYSL3	dihydropyrimidinase like 3	DRP-3,ULIP,CRMP4	GO:0045202	synapse (GO:0045202)	CC	1658
MGI:1096317	HGNC:3192	EEF1A2	eukaryotic translation elongation factor 1 alpha 2	EEF1AL,HS1,STNL,STN	GO:0045202	synapse (GO:0045202)	CC	1659
MGI:700009	HGNC:10831	SH3GL2	SH3 domain containing GRB2 like 2, endophilin A1	SH3P4,SH3D2A,CNSA2,EEN-B1	GO:0045202	synapse (GO:0045202)	CC	1701
MGI:700010	HGNC:10830	SH3GL1	SH3 domain containing GRB2 like 1, endophilin A2	SH3P8,SH3D2B,CNSA1,EEN,MGC111371	GO:0045202	synapse (GO:0045202)	CC	1702
MGI:1321159	HGNC:9299	PPP2CA	protein phosphatase 2 catalytic subunit alpha	PP2CALPHA,PP2AC	GO:0045202	synapse (GO:0045202)	CC	1892
MGI:1349722	HGNC:8554	PABPC1	poly(A) binding protein cytoplasmic 1	PABP1,PABPL1,PAB1,PABPC2	GO:0045202	synapse (GO:0045202)	CC	1900
MGI:1926334	HGNC:9302	PPP2R1A	protein phosphatase 2 scaffold subunit Aalpha	PR65A,PP2A-AALPHA,PP2AA	GO:0045202	synapse (GO:0045202)	CC	1973
MGI:1345961	HGNC:2252	CORO1A	coronin 1A	HCORO1,P57,CORONIN-1	GO:0045202	synapse (GO:0045202)	CC	2294
MGI:2442582	HGNC:29132	ABLIM3	actin binding LIM protein family member 3	KIAA0843	GO:0045202	synapse (GO:0045202)	CC	2314
MGI:99217	HGNC:1750	CDH11	cadherin 11	OB,CAD11	GO:0045202	synapse (GO:0045202)	CC	2318
MGI:891963	HGNC:12854	YWHAQ	tyrosine 3-monooxygenase/tryptophan 5-monooxygenase activation protein theta	HS1,14-3-3	GO:0045202	synapse (GO:0045202)	CC	2349
MGI:2444672	HGNC:6766	MADD	MAP kinase activating death domain	DENN,KIAA0358,RAB3GEP	GO:0045202	synapse (GO:0045202)	CC	2388
MGI:2183559	HGNC:15852	ARFGAP1	ADP ribosylation factor GTPase activating protein 1	FLJ10767,BA261N11.3,ARF1GAP	GO:0045202	synapse (GO:0045202)	CC	2390
MGI:1919228	HGNC:9304	PPP2R2A	protein phosphatase 2 regulatory subunit Balpha	PR52A,PR55A,B55A,PR55ALPHA,B55ALPHA	GO:0045202	synapse (GO:0045202)	CC	2396
MGI:108109	HGNC:12852	YWHAG	tyrosine 3-monooxygenase/tryptophan 5-monooxygenase activation protein gamma	PPP1R170,14-3-3GAMMA,14-3-3Γ	GO:0045202	synapse (GO:0045202)	CC	2535
MGI:894689	HGNC:12851	YWHAE	tyrosine 3-monooxygenase/tryptophan 5-monooxygenase activation protein epsilon	FLJ45465	GO:0045202	synapse (GO:0045202)	CC	2536
MGI:109194	HGNC:12853	YWHAH	tyrosine 3-monooxygenase/tryptophan 5-monooxygenase activation protein eta	YWHA1	GO:0045202	synapse (GO:0045202)	CC	2537
MGI:1916977	HGNC:20075	USP46	ubiquitin specific peptidase 46	FLJ12552	GO:0045202	synapse (GO:0045202)	CC	2868
MGI:2386251	HGNC:18138	EIF3L	eukaryotic translation initiation factor 3 subunit L	HSPC021,HSPC025,EIF3S11,EIF3S6IP,EIF3EIP	GO:0045202	synapse (GO:0045202)	CC	3888
MGI:1923935	HGNC:3298	EIF4G3	eukaryotic translation initiation factor 4 gamma 3	EIF4GII	GO:0045202	synapse (GO:0045202)	CC	3890
MGI:95309	HGNC:3299	EIF5	eukaryotic translation initiation factor 5		GO:0045202	synapse (GO:0045202)	CC	3891
MGI:106248	HGNC:3300	EIF5A	eukaryotic translation initiation factor 5A	EIF5A1,EIF-5A,MGC99547,MGC104255	GO:0045202	synapse (GO:0045202)	CC	3892
MGI:97912	HGNC:10011	RHEB	Ras homolog, mTORC1 binding	RHEB2	GO:0045202	synapse (GO:0045202)	CC	3911
MGI:95299	HGNC:3265	EIF2S1	eukaryotic translation initiation factor 2 subunit alpha	EIF-2ALPHA,EIF2A,EIF2	GO:0045202	synapse (GO:0045202)	CC	3915
MGI:102548	HGNC:12363	TSC2	TSC complex subunit 2	TUBERIN,LAM,PPP1R160,TSC4	GO:0045202	synapse (GO:0045202)	CC	3927
MGI:1298405	HGNC:564	AP2M1	adaptor related protein complex 2 subunit mu 1	AP50,MU2,CLAPM1	GO:0045202	synapse (GO:0045202)	CC	3935
MGI:1919020	HGNC:563	AP2B1	adaptor related protein complex 2 subunit beta 1	ADTB2,CLAPB1	GO:0045202	synapse (GO:0045202)	CC	3936
MGI:97855	HGNC:9861	RAP2A	RAP2A, member of RAS oncogene family	K-REV,RAP2	GO:0045202	synapse (GO:0045202)	CC	3973
MGI:1915661	HGNC:6838	MAP1LC3A	microtubule associated protein 1 light chain 3 alpha	MAP1BLC3,MAP1ALC3,LC3,LC3A,ATG8E	GO:0045202	synapse (GO:0045202)	CC	3984
MGI:107949	HGNC:668	RHOB	ras homolog family member B	RHOH6,MST081,ARH6,ARHB	GO:0045202	synapse (GO:0045202)	CC	3994
MGI:2443456	HGNC:29203	TBC1D24	TBC1 domain family member 24	KIAA1171,TLDC6,DFNA65,DFNB86	GO:0045202	synapse (GO:0045202)	CC	4150
MGI:1339639	HGNC:8127	OGT	O-linked N-acetylglucosamine (GlcNAc) transferase	O-GLCNAC,HRNT1,MGC22921,FLJ23071,OGT1	GO:0045202	synapse (GO:0045202)	CC	4520
MGI:1931838	HGNC:2695	DBN1	drebrin 1	D0S117E	GO:0045211	postsynaptic membrane (GO:0045211)	CC	1926
MGI:1931838	HGNC:2695	DBN1	drebrin 1	D0S117E	GO:0045211	postsynaptic membrane (GO:0045211)	CC	1965
MGI:109132	HGNC:14986	SNAP91	synaptosome associated protein 91	KIAA0656,AP180,CALM	GO:0045211	postsynaptic membrane (GO:0045211)	CC	2004
MGI:1346089	HGNC:10003	RGS7	regulator of G protein signaling 7		GO:0045211	postsynaptic membrane (GO:0045211)	CC	2705
MGI:1931295	HGNC:9767	RAB27B	RAB27B, member RAS oncogene family		GO:0048488	synaptic vesicle endocytosis (GO:0048488)	BP	46
MGI:99435	HGNC:659	ARF6	ADP ribosylation factor 6		GO:0048488	synaptic vesicle endocytosis (GO:0048488)	BP	496
MGI:2388633	HGNC:2092	CLTC	clathrin heavy chain	HC,CLTCL2	GO:0048488	synaptic vesicle endocytosis (GO:0048488)	BP	657
MGI:700009	HGNC:10831	SH3GL2	SH3 domain containing GRB2 like 2, endophilin A1	SH3P4,SH3D2A,CNSA2,EEN-B1	GO:0048488	synaptic vesicle endocytosis (GO:0048488)	BP	666
MGI:107384	HGNC:2972	DNM1	dynamin 1	DNM	GO:0048488	synaptic vesicle endocytosis (GO:0048488)	BP	670
MGI:1341299	HGNC:29125	DNM3	dynamin 3	KIAA0820	GO:0048488	synaptic vesicle endocytosis (GO:0048488)	BP	676
MGI:109132	HGNC:14986	SNAP91	synaptosome associated protein 91	KIAA0656,AP180,CALM	GO:0048488	synaptic vesicle endocytosis (GO:0048488)	BP	702
MGI:2385902	HGNC:15514	PICALM	phosphatidylinositol binding clathrin assembly protein	CALM,CLTH	GO:0048488	synaptic vesicle endocytosis (GO:0048488)	BP	704
MGI:103574	HGNC:471	AMPH	amphiphysin		GO:0048488	synaptic vesicle endocytosis (GO:0048488)	BP	705
MGI:1345181	HGNC:8570	PACSIN1	protein kinase C and casein kinase substrate in neurons 1	SDPI	GO:0048488	synaptic vesicle endocytosis (GO:0048488)	BP	735
MGI:1298405	HGNC:564	AP2M1	adaptor related protein complex 2 subunit mu 1	AP50,MU2,CLAPM1	GO:0048488	synaptic vesicle endocytosis (GO:0048488)	BP	1020
MGI:105926	HGNC:9783	RAB5A	RAB5A, member RAS oncogene family	RAB5	GO:0048488	synaptic vesicle endocytosis (GO:0048488)	BP	1169
MGI:1333763	HGNC:21604	EPN1	epsin 1		GO:0048488	synaptic vesicle endocytosis (GO:0048488)	BP	1177
MGI:1338069	HGNC:6183	ITSN1	intersectin 1	SH3P17,MGC134948,MGC134949,SH3D1A,ITSN	GO:0048488	synaptic vesicle endocytosis (GO:0048488)	BP	1178
MGI:1341878	HGNC:3242	EHD1	EH domain containing 1	H-PAST,HPAST1,FLJ42622,FLJ44618,PAST1	GO:0048488	synaptic vesicle endocytosis (GO:0048488)	BP	1255
MGI:109547	HGNC:2974	DNM2	dynamin 2	DYNII,DYN2,CMTDIB,CMTDI1,DI-CMTB,CMT2M	GO:0048488	synaptic vesicle endocytosis (GO:0048488)	BP	1279
MGI:103574	HGNC:471	AMPH	amphiphysin		GO:0048488	synaptic vesicle endocytosis (GO:0048488)	BP	1494
MGI:108092	HGNC:1052	BIN1	bridging integrator 1	SH3P9,AMPH2,AMPHL	GO:0048488	synaptic vesicle endocytosis (GO:0048488)	BP	1496
MGI:107384	HGNC:2972	DNM1	dynamin 1	DNM	GO:0048488	synaptic vesicle endocytosis (GO:0048488)	BP	1632
MGI:1921256	HGNC:2973	DNM1L	dynamin 1 like	DRP1,DVLP,HDYNIV,DYMPLE,VPS1	GO:0048488	synaptic vesicle endocytosis (GO:0048488)	BP	1797
MGI:101919	HGNC:555	AP1G1	adaptor related protein complex 1 subunit gamma 1	CLAPG1,ADTG	GO:0048488	synaptic vesicle endocytosis (GO:0048488)	BP	1821
MGI:1277151	HGNC:11138	SNCA	synuclein alpha	NACP,PD1,PARK1,PARK4	GO:0048488	synaptic vesicle endocytosis (GO:0048488)	BP	2305
MGI:1889011	HGNC:11140	SNCB	synuclein beta		GO:0048488	synaptic vesicle endocytosis (GO:0048488)	BP	2446
MGI:1919020	HGNC:563	AP2B1	adaptor related protein complex 2 subunit beta 1	ADTB2,CLAPB1	GO:0048488	synaptic vesicle endocytosis (GO:0048488)	BP	2739
MGI:108092	HGNC:1052	BIN1	bridging integrator 1	SH3P9,AMPH2,AMPHL	GO:0048488	synaptic vesicle endocytosis (GO:0048488)	BP	3742
MGI:108092	HGNC:1052	BIN1	bridging integrator 1	SH3P9,AMPH2,AMPHL	GO:0048488	synaptic vesicle endocytosis (GO:0048488)	BP	3746
MGI:1298405	HGNC:564	AP2M1	adaptor related protein complex 2 subunit mu 1	AP50,MU2,CLAPM1	GO:0048488	synaptic vesicle endocytosis (GO:0048488)	BP	3942
MGI:1201685	HGNC:2494	CTBP1	C-terminal binding protein 1	BARS	GO:0048488	synaptic vesicle endocytosis (GO:0048488)	BP	4142
MGI:2444672	HGNC:6766	MADD	MAP kinase activating death domain	DENN,KIAA0358,RAB3GEP	GO:0048490	anterograde synaptic vesicle transport (GO:0048490)	BP	247
MGI:1915076	HGNC:30669	SNAP47	synaptosome associated protein 47	SVAP1,SNAP-47,C1ORF142	GO:0048786	presynaptic active zone (GO:0048786)	CC	1211
MGI:1913501	HGNC:661	ARFGAP3	ADP ribosylation factor GTPase activating protein 3	ARFGAP1	GO:0048786	presynaptic active zone (GO:0048786)	CC	3119
MGI:1924037	HGNC:9247	PPFIA3	PTPRF interacting protein alpha 3	KIAA0654,LPNA3,MGC126567,MGC126569	GO:0048786	presynaptic active zone (GO:0048786)	CC	4171
MGI:88296	HGNC:1389	CACNA1B	calcium voltage-gated channel subunit alpha1 B	CAV2.2,CACNN,CACNL1A5	GO:0048786	presynaptic active zone (GO:0048786)	CC	4512
MGI:104563	HGNC:7641	NAPA	NSF attachment protein alpha		GO:0048787	presynaptic active zone membrane (GO:0048787)	CC	36
MGI:1860297	HGNC:578	APBA1	amyloid beta precursor protein binding family A member 1	D9S411E,X11,MINT1	GO:0048787	presynaptic active zone membrane (GO:0048787)	CC	869
MGI:106919	HGNC:12669	VDAC1	voltage dependent anion channel 1	MGC111064,PORIN	GO:0048787	presynaptic active zone membrane (GO:0048787)	CC	2982
MGI:104562	HGNC:15751	NAPB	NSF attachment protein beta	SNAP-BETA,SNAPB	GO:0048787	presynaptic active zone membrane (GO:0048787)	CC	3797
MGI:97759	HGNC:9390	PRKAR1B	protein kinase cAMP-dependent type I regulatory subunit beta		GO:0050804	modulation of chemical synaptic transmission (GO:0050804)	BP	437
MGI:97759	HGNC:9390	PRKAR1B	protein kinase cAMP-dependent type I regulatory subunit beta		GO:0050804	modulation of chemical synaptic transmission (GO:0050804)	BP	439
MGI:97760	HGNC:9392	PRKAR2B	protein kinase cAMP-dependent type II regulatory subunit beta	PRKAR2	GO:0050804	modulation of chemical synaptic transmission (GO:0050804)	BP	441
MGI:99677	HGNC:232	ADCY1	adenylate cyclase 1	AC1,DFNB44	GO:0050804	modulation of chemical synaptic transmission (GO:0050804)	BP	471
MGI:1932576	HGNC:370	AKAP12	A-kinase anchoring protein 12	AKAP250,SSECKS	GO:0050804	modulation of chemical synaptic transmission (GO:0050804)	BP	686
MGI:103038	HGNC:11364	STAT3	signal transducer and activator of transcription 3	APRF	GO:0050804	modulation of chemical synaptic transmission (GO:0050804)	BP	1078
MGI:99894	HGNC:5044	HNRNPK	heterogeneous nuclear ribonucleoprotein K	CSBP,TUNP,HNRPK	GO:0050804	modulation of chemical synaptic transmission (GO:0050804)	BP	1597
MGI:1920960	HGNC:30829	TUBB2B	tubulin beta 2B class IIb	MGC8685,DKFZP566F223,BA506K6.1	GO:0050804	modulation of chemical synaptic transmission (GO:0050804)	BP	1686
MGI:95602	HGNC:4037	FYN	FYN proto-oncogene, Src family tyrosine kinase	SYN,SLK,MGC45350	GO:0050804	modulation of chemical synaptic transmission (GO:0050804)	BP	1741
MGI:1351342	HGNC:4597	GRM5	glutamate metabotropic receptor 5	MGLUR5,GPRC1E,MGLU5,PPP1R86	GO:0050804	modulation of chemical synaptic transmission (GO:0050804)	BP	2064
MGI:99217	HGNC:1750	CDH11	cadherin 11	OB,CAD11	GO:0050804	modulation of chemical synaptic transmission (GO:0050804)	BP	2319
MGI:107771	HGNC:81	ABR	ABR activator of RhoGEF and GTPase	MDB	GO:0050804	modulation of chemical synaptic transmission (GO:0050804)	BP	2399
MGI:88141	HGNC:1014	BCR	BCR activator of RhoGEF and GTPase	D22S662,CML,PHL,ALL,D22S11,BCR1	GO:0050804	modulation of chemical synaptic transmission (GO:0050804)	BP	2400
MGI:1889276	HGNC:2852	DGKE	diacylglycerol kinase epsilon	DAGK6,DGK	GO:0050804	modulation of chemical synaptic transmission (GO:0050804)	BP	2599
MGI:96721	HGNC:6470	L1CAM	L1 cell adhesion molecule	CD171,HSAS1,SPG1,HSAS,MASA,MIC5,S10	GO:0050804	modulation of chemical synaptic transmission (GO:0050804)	BP	2638
MGI:97812	HGNC:9668	PTPRD	protein tyrosine phosphatase receptor type D	PTPD,HPTP	GO:0050804	modulation of chemical synaptic transmission (GO:0050804)	BP	2648
MGI:97815	HGNC:9681	PTPRS	protein tyrosine phosphatase receptor type S		GO:0050804	modulation of chemical synaptic transmission (GO:0050804)	BP	2650
MGI:107384	HGNC:2972	DNM1	dynamin 1	DNM	GO:0050804	modulation of chemical synaptic transmission (GO:0050804)	BP	2879
MGI:1345153	HGNC:8571	PACSIN2	protein kinase C and casein kinase substrate in neurons 2	SDPII	GO:0050804	modulation of chemical synaptic transmission (GO:0050804)	BP	2915
MGI:1346859	HGNC:6877	MAPK3	mitogen-activated protein kinase 3	ERK1,P44MAPK,P44ERK1,PRKM3	GO:0050804	modulation of chemical synaptic transmission (GO:0050804)	BP	3649
MGI:101757	HGNC:1874	CFL1	cofilin 1	CFL	GO:0050804	modulation of chemical synaptic transmission (GO:0050804)	BP	3663
MGI:2183572	HGNC:18747	CNTNAP4	contactin associated protein family member 4	CASPR4,KIAA1763	GO:0050804	modulation of chemical synaptic transmission (GO:0050804)	BP	3678
MGI:3613677	HGNC:15474	SHANK1	SH3 and multiple ankyrin repeat domains 1	SSTRIP,SPANK-1,SYNAMON	GO:0050804	modulation of chemical synaptic transmission (GO:0050804)	BP	3682
MGI:97549	HGNC:8881	PFN1	profilin 1		GO:0050804	modulation of chemical synaptic transmission (GO:0050804)	BP	3696
MGI:97550	HGNC:8882	PFN2	profilin 2		GO:0050804	modulation of chemical synaptic transmission (GO:0050804)	BP	3697
MGI:105098	HGNC:12496	UBE3A	ubiquitin protein ligase E3A	AS,ANCR,E6-AP,FLJ26981,EPVE6AP,HPVE6A	GO:0050804	modulation of chemical synaptic transmission (GO:0050804)	BP	3729
MGI:2442092	HGNC:14540	WNK1	WNK lysine deficient protein kinase 1	HSAN2,PPP1R167,PRKWNK1,HSN2	GO:0050804	modulation of chemical synaptic transmission (GO:0050804)	BP	3747
MGI:109520	HGNC:8574	PAFAH1B1	platelet activating factor acetylhydrolase 1b regulatory subunit 1	LIS1,PAFAH,NUDF,MDCR,MDS	GO:0050804	modulation of chemical synaptic transmission (GO:0050804)	BP	3808
MGI:1346861	HGNC:6881	MAPK8	mitogen-activated protein kinase 8	JNK,JNK1,SAPK1,PRKM8	GO:0050804	modulation of chemical synaptic transmission (GO:0050804)	BP	3949
MGI:1915835	HGNC:14085	RTN4	reticulon 4	NSP-CL,KIAA0886,NOGO,ASY	GO:0050804	modulation of chemical synaptic transmission (GO:0050804)	BP	4026
MGI:1355333	HGNC:7666	NCKAP1	NCK associated protein 1	NAP1,HEM2,NAP125	GO:0050807	regulation of synapse organization (GO:0050807)	BP	482
MGI:99919	HGNC:12666	VCP	valosin containing protein	IBMPFD,P97,CDC48,TERA	GO:0050807	regulation of synapse organization (GO:0050807)	BP	484
MGI:88548	HGNC:2460	CSNK2B	casein kinase 2 beta	CKB1,CKB2	GO:0050807	regulation of synapse organization (GO:0050807)	BP	968
MGI:1098535	HGNC:1459	CAMK1	calcium/calmodulin dependent protein kinase I	CAMKI,CAMKI-ALPHA	GO:0050807	regulation of synapse organization (GO:0050807)	BP	980
MGI:2183572	HGNC:18747	CNTNAP4	contactin associated protein family member 4	CASPR4,KIAA1763	GO:0050807	regulation of synapse organization (GO:0050807)	BP	1281
MGI:99433	HGNC:655	ARF4	ADP ribosylation factor 4	ARF2	GO:0050807	regulation of synapse organization (GO:0050807)	BP	1392
MGI:1277214	HGNC:25589	SEPTIN11	septin 11	FLJ10849,SEPT11	GO:0050807	regulation of synapse organization (GO:0050807)	BP	1631
MGI:107812	HGNC:20778	TUBB	tubulin beta class I	OK/SW-CL.56,MGC16435,M40,TUBB5	GO:0050807	regulation of synapse organization (GO:0050807)	BP	1685
MGI:107671	HGNC:4460	GPM6A	glycoprotein M6A	GPM6	GO:0050807	regulation of synapse organization (GO:0050807)	BP	2381
MGI:1926483	HGNC:9706	NECTIN1	nectin cell adhesion molecule 1	PRR,PRR1,PVRR1,SK-12,HIGR,CLPED1,CD111,OFC7,HVEC,ED4,PVRL1	GO:0050807	regulation of synapse organization (GO:0050807)	BP	2407
MGI:107765	HGNC:581	APBB1	amyloid beta precursor protein binding family B member 1	FE65,RIR	GO:0050808	synapse organization (GO:0050808)	BP	1629
MGI:97815	HGNC:9681	PTPRS	protein tyrosine phosphatase receptor type S		GO:0050808	synapse organization (GO:0050808)	BP	2743
MGI:1347075	HGNC:7648	NBEA	neurobeachin	KIAA1544,BCL8B,FLJ10197,LYST2	GO:0050808	synapse organization (GO:0050808)	BP	3781
MGI:1347075	HGNC:7648	NBEA	neurobeachin	KIAA1544,BCL8B,FLJ10197,LYST2	GO:0050808	synapse organization (GO:0050808)	BP	3833
MGI:1330281	HGNC:14258	CD2AP	CD2 associated protein	CMS	GO:0050808	synapse organization (GO:0050808)	BP	4145
MGI:1341881	HGNC:11501	SYNGR3	synaptogyrin 3		GO:0051580	regulation of neurotransmitter uptake (GO:0051580)	BP	1167
MGI:97855	HGNC:9861	RAP2A	RAP2A, member of RAS oncogene family	K-REV,RAP2	GO:0051963	regulation of synapse assembly (GO:0051963)	BP	3974
MGI:1339639	HGNC:8127	OGT	O-linked N-acetylglucosamine (GlcNAc) transferase	O-GLCNAC,HRNT1,MGC22921,FLJ23071,OGT1	GO:0051963	regulation of synapse assembly (GO:0051963)	BP	4525
MGI:97549	HGNC:8881	PFN1	profilin 1		GO:0060074	synapse maturation (GO:0060074)	BP	1663
MGI:1346089	HGNC:10003	RGS7	regulator of G protein signaling 7		GO:0060078	regulation of postsynaptic membrane potential (GO:0060078)	BP	2835
MGI:1346089	HGNC:10003	RGS7	regulator of G protein signaling 7		GO:0060078	regulation of postsynaptic membrane potential (GO:0060078)	BP	2836
MGI:106334	HGNC:23271	RGS7BP	regulator of G protein signaling 7 binding protein	R7BP	GO:0060078	regulation of postsynaptic membrane potential (GO:0060078)	BP	2837
MGI:106334	HGNC:23271	RGS7BP	regulator of G protein signaling 7 binding protein	R7BP	GO:0060078	regulation of postsynaptic membrane potential (GO:0060078)	BP	2838
MGI:1339975	HGNC:8590	PAK1	p21 (RAC1) activated kinase 1		GO:0090128	regulation of synapse maturation (GO:0090128)	BP	1893
MGI:1339656	HGNC:8592	PAK3	p21 (RAC1) activated kinase 3	HPAK3,BPAK,MRX30,MRX47	GO:0090128	regulation of synapse maturation (GO:0090128)	BP	1893
MGI:109484	HGNC:12855	YWHAZ	tyrosine 3-monooxygenase/tryptophan 5-monooxygenase activation protein zeta	KCIP-1,14-3-3-ZETA,YWHAD	GO:0090128	regulation of synapse maturation (GO:0090128)	BP	2341
MGI:88257	HGNC:1461	CAMK2B	calcium/calmodulin dependent protein kinase II beta	CAM2,CAMK2,CAMKIIΒ,CAMKB	GO:0090128	regulation of synapse maturation (GO:0090128)	BP	3724
MGI:107926	HGNC:10252	ROCK2	Rho associated coiled-coil containing protein kinase 2		GO:0090128	regulation of synapse maturation (GO:0090128)	BP	4086
MGI:108077	HGNC:17867	NPTN	neuroplastin	SDR1,GP55,GP65,NP65,NP55,SDFR1	GO:0097060	synaptic membrane (GO:0097060)	CC	31
MGI:97855	HGNC:9861	RAP2A	RAP2A, member of RAS oncogene family	K-REV,RAP2	GO:0097060	synaptic membrane (GO:0097060)	CC	3971
MGI:1927243	HGNC:9839	RALA	RAS like proto-oncogene A	RAL	GO:0097060	synaptic membrane (GO:0097060)	CC	3989
MGI:1349390	HGNC:13406	PCLO	piccolo presynaptic cytomatrix protein	KIAA0559,DKFZP779G1236,ACZ	GO:0097091	synaptic vesicle clustering (GO:0097091)	BP	356
MGI:106913	HGNC:24011	ABI2	abl interactor 2	ABI-2,AIP-1,ABI2B,ABLBP3,ARGBPIA,SSH3BP2	GO:0097091	synaptic vesicle clustering (GO:0097091)	BP	1942
MGI:1277955	HGNC:1117	BSN	bassoon presynaptic cytomatrix protein	ZNF231	GO:0097091	synaptic vesicle clustering (GO:0097091)	BP	3741
MGI:1201685	HGNC:2494	CTBP1	C-terminal binding protein 1	BARS	GO:0097091	synaptic vesicle clustering (GO:0097091)	BP	4143
MGI:1096389	HGNC:8010	NRXN3	neurexin 3	KIAA0743,C14ORF60	GO:0097107	postsynaptic density assembly (GO:0097107)	BP	3100
MGI:1201780	HGNC:851	ATP6V1A	ATPase H+ transporting V1 subunit A	VMA1,VA68,VPP2,ATP6A1,ATP6V1A1	GO:0097401	synaptic vesicle proton loading (GO:0097401)	BP	4440
MGI:109618	HGNC:854	ATP6V1B2	ATPase H+ transporting V1 subunit B2	VATB,VMA2,HO57,VPP3,ATP6B2	GO:0097401	synaptic vesicle proton loading (GO:0097401)	BP	4441
MGI:1921084	HGNC:13527	ATP6V1D	ATPase H+ transporting V1 subunit D	VATD,VMA8,ATP6M	GO:0097401	synaptic vesicle proton loading (GO:0097401)	BP	4443
MGI:894326	HGNC:857	ATP6V1E1	ATPase H+ transporting V1 subunit E1	P31,VMA4,ATP6E2,ATP6E,ATP6V1E	GO:0097401	synaptic vesicle proton loading (GO:0097401)	BP	4444
MGI:1913394	HGNC:16832	ATP6V1F	ATPase H+ transporting V1 subunit F	ATP6S14,VATF,VMA7	GO:0097401	synaptic vesicle proton loading (GO:0097401)	BP	4445
MGI:1201778	HGNC:13724	ATP6V0D1	ATPase H+ transporting V0 subunit d1	ATP6DV,VATX,VPATPD,P39,VMA6,ATP6D	GO:0097401	synaptic vesicle proton loading (GO:0097401)	BP	4446
MGI:1913487	HGNC:862	ATP6V1G2	ATPase H+ transporting V1 subunit G2	VMA10,NG38,EM:AC004181.3,ATP6G,ATP6G2	GO:0097401	synaptic vesicle proton loading (GO:0097401)	BP	4449
MGI:103286	HGNC:865	ATP6V0A1	ATPase H+ transporting V0 subunit a1	A1,VPH1,STV1,VPP1,ATP6N1,ATP6N1A	GO:0097401	synaptic vesicle proton loading (GO:0097401)	BP	4452
MGI:1914864	HGNC:18303	ATP6V1H	ATPase H+ transporting V1 subunit H	CGI-11,SFD,VMA13,SFDALPHA,SFDBETA	GO:0097401	synaptic vesicle proton loading (GO:0097401)	BP	4453
MGI:1099446	HGNC:30672	SYNPO	synaptopodin	KIAA1029	GO:0097444	spine apparatus (GO:0097444)	CC	264
MGI:1350922	HGNC:1426	CADPS	calcium dependent secretion activator	CAPS,KIAA1121,CAPS1,UNC-31	GO:0098674	extrinsic component of neuronal dense core vesicle membrane (GO:0098674)	CC	557
MGI:1277955	HGNC:1117	BSN	bassoon presynaptic cytomatrix protein	ZNF231	GO:0098693	regulation of synaptic vesicle cycle (GO:0098693)	BP	124
MGI:892995	HGNC:16235	DNAJC5	DnaJ heat shock protein family (Hsp40) member C5	FLJ00118,FLJ13070,DNAJC5A,CLN4	GO:0098693	regulation of synaptic vesicle cycle (GO:0098693)	BP	149
MGI:98460	HGNC:11494	SYN1	synapsin I	MRX50	GO:0098693	regulation of synaptic vesicle cycle (GO:0098693)	BP	318
MGI:97759	HGNC:9390	PRKAR1B	protein kinase cAMP-dependent type I regulatory subunit beta		GO:0098693	regulation of synaptic vesicle cycle (GO:0098693)	BP	438
MGI:892995	HGNC:16235	DNAJC5	DnaJ heat shock protein family (Hsp40) member C5	FLJ00118,FLJ13070,DNAJC5A,CLN4	GO:0098693	regulation of synaptic vesicle cycle (GO:0098693)	BP	671
MGI:1096391	HGNC:8008	NRXN1	neurexin 1	KIAA0578,HS.22998	GO:0098693	regulation of synaptic vesicle cycle (GO:0098693)	BP	898
MGI:1328323	HGNC:11498	SYNGR1	synaptogyrin 1		GO:0098693	regulation of synaptic vesicle cycle (GO:0098693)	BP	1165
MGI:1341881	HGNC:11501	SYNGR3	synaptogyrin 3		GO:0098693	regulation of synaptic vesicle cycle (GO:0098693)	BP	1165
MGI:1914724	HGNC:11133	SNAP29	synaptosome associated protein 29	SNAP-29,CEDNIK	GO:0098693	regulation of synaptic vesicle cycle (GO:0098693)	BP	1210
MGI:1917158	HGNC:9778	RAB3B	RAB3B, member RAS oncogene family		GO:0098693	regulation of synaptic vesicle cycle (GO:0098693)	BP	2389
MGI:104807	HGNC:9091	PLS3	plastin 3	T-PLASTIN	GO:0098693	regulation of synaptic vesicle cycle (GO:0098693)	BP	2447
MGI:1917723	HGNC:16626	RAPGEF4	Rap guanine nucleotide exchange factor 4	CAMP-GEFII,CGEF2	GO:0098693	regulation of synaptic vesicle cycle (GO:0098693)	BP	2852
MGI:107172	HGNC:9317	PPP3R1	protein phosphatase 3 regulatory subunit B, alpha	CALNB1,CNB,CNB1	GO:0098693	regulation of synaptic vesicle cycle (GO:0098693)	BP	3953
MGI:1328323	HGNC:11498	SYNGR1	synaptogyrin 1		GO:0098693	regulation of synaptic vesicle cycle (GO:0098693)	BP	3967
MGI:1341881	HGNC:11501	SYNGR3	synaptogyrin 3		GO:0098693	regulation of synaptic vesicle cycle (GO:0098693)	BP	3967
MGI:1917188	HGNC:22192	SCRN1	secernin 1	KIAA0193	GO:0098693	regulation of synaptic vesicle cycle (GO:0098693)	BP	4008
MGI:1346866	HGNC:6840	MAP2K1	mitogen-activated protein kinase kinase 1	MEK1,MAPKK1,PRKMK1	GO:0098696	regulation of neurotransmitter receptor localization to postsynaptic specialization membrane (GO:0098696)	BP	1342
MGI:1354953	HGNC:18957	MAGI2	membrane associated guanylate kinase, WW and PDZ domain containing 2	AIP1,ARIP1,KIAA0705,ACVRIP1,MAGI-2	GO:0098696	regulation of neurotransmitter receptor localization to postsynaptic specialization membrane (GO:0098696)	BP	1750
MGI:1861437	HGNC:4617	GSK3B	glycogen synthase kinase 3 beta		GO:0098696	regulation of neurotransmitter receptor localization to postsynaptic specialization membrane (GO:0098696)	BP	1891
MGI:88256	HGNC:1460	CAMK2A	calcium/calmodulin dependent protein kinase II alpha	KIAA0968,CAMKIINALPHA,CAMKIIΑ,CAMKA	GO:0098696	regulation of neurotransmitter receptor localization to postsynaptic specialization membrane (GO:0098696)	BP	2075
MGI:1339975	HGNC:8590	PAK1	p21 (RAC1) activated kinase 1		GO:0098696	regulation of neurotransmitter receptor localization to postsynaptic specialization membrane (GO:0098696)	BP	2432
MGI:1339656	HGNC:8592	PAK3	p21 (RAC1) activated kinase 3	HPAK3,BPAK,MRX30,MRX47	GO:0098696	regulation of neurotransmitter receptor localization to postsynaptic specialization membrane (GO:0098696)	BP	2432
MGI:1339975	HGNC:8590	PAK1	p21 (RAC1) activated kinase 1		GO:0098696	regulation of neurotransmitter receptor localization to postsynaptic specialization membrane (GO:0098696)	BP	2433
MGI:1339656	HGNC:8592	PAK3	p21 (RAC1) activated kinase 3	HPAK3,BPAK,MRX30,MRX47	GO:0098696	regulation of neurotransmitter receptor localization to postsynaptic specialization membrane (GO:0098696)	BP	2433
MGI:1917723	HGNC:16626	RAPGEF4	Rap guanine nucleotide exchange factor 4	CAMP-GEFII,CGEF2	GO:0098696	regulation of neurotransmitter receptor localization to postsynaptic specialization membrane (GO:0098696)	BP	2850
MGI:1347075	HGNC:7648	NBEA	neurobeachin	KIAA1544,BCL8B,FLJ10197,LYST2	GO:0098696	regulation of neurotransmitter receptor localization to postsynaptic specialization membrane (GO:0098696)	BP	3780
MGI:1339639	HGNC:8127	OGT	O-linked N-acetylglucosamine (GlcNAc) transferase	O-GLCNAC,HRNT1,MGC22921,FLJ23071,OGT1	GO:0098696	regulation of neurotransmitter receptor localization to postsynaptic specialization membrane (GO:0098696)	BP	4521
MGI:2179435	HGNC:14291	NLGN1	neuroligin 1	KIAA1070	GO:0098698	postsynaptic specialization assembly (GO:0098698)	BP	2758
MGI:88508	HGNC:2362	CRK	CRK proto-oncogene, adaptor protein		GO:0098698	postsynaptic specialization assembly (GO:0098698)	BP	3731
MGI:104807	HGNC:9091	PLS3	plastin 3	T-PLASTIN	GO:0098699	structural constituent of presynaptic actin cytoskeleton (GO:0098699)	BP	2295
MGI:106677	HGNC:10935	SLC18A2	solute carrier family 18 member A2	SVMT,SVAT,VMAT2	GO:0098700	synaptic vesicle neurotransmitter loading (GO:0098700)	BP	476
MGI:97842	HGNC:9758	RAB1A	RAB1A, member RAS oncogene family	YPT1,RAB1	GO:0098793	presynapse (GO:0098793)	CC	208
MGI:894313	HGNC:9786	RAB6A	RAB6A, member RAS oncogene family	RAB6	GO:0098793	presynapse (GO:0098793)	CC	211
MGI:107283	HGNC:14902	RAB6B	RAB6B, member RAS oncogene family		GO:0098793	presynapse (GO:0098793)	CC	212
MGI:103301	HGNC:1404	CACNB4	calcium voltage-gated channel auxiliary subunit beta 4	EJM4	GO:0098793	presynapse (GO:0098793)	CC	335
MGI:1349763	HGNC:3014	DPYSL2	dihydropyrimidinase like 2	DRP-2,DHPRP2,CRMP2,DRP2	GO:0098793	presynapse (GO:0098793)	CC	347
MGI:102522	HGNC:1401	CACNB1	calcium voltage-gated channel auxiliary subunit beta 1	CACNLB1	GO:0098793	presynapse (GO:0098793)	CC	363
MGI:1350922	HGNC:1426	CADPS	calcium dependent secretion activator	CAPS,KIAA1121,CAPS1,UNC-31	GO:0098793	presynapse (GO:0098793)	CC	491
MGI:2443963	HGNC:16018	CADPS2	calcium dependent secretion activator 2	CAPS2	GO:0098793	presynapse (GO:0098793)	CC	495
MGI:1203522	HGNC:946	MAGI1	membrane associated guanylate kinase, WW and PDZ domain containing 1	BAP1,MAGI-1,TNRC19,AIP3,WWP3,BAIAP1	GO:0098793	presynapse (GO:0098793)	CC	543
MGI:104726	HGNC:2310	CPLX2	complexin 2	CPX-2,DKFZP547D155	GO:0098793	presynapse (GO:0098793)	CC	580
MGI:104727	HGNC:2309	CPLX1	complexin 1	CPX-I	GO:0098793	presynapse (GO:0098793)	CC	581
MGI:104726	HGNC:2310	CPLX2	complexin 2	CPX-2,DKFZP547D155	GO:0098793	presynapse (GO:0098793)	CC	582
MGI:104727	HGNC:2309	CPLX1	complexin 1	CPX-I	GO:0098793	presynapse (GO:0098793)	CC	584
MGI:1354961	HGNC:11503	SYNJ1	synaptojanin 1	INPP5G,PARK20	GO:0098793	presynapse (GO:0098793)	CC	706
MGI:104563	HGNC:7641	NAPA	NSF attachment protein alpha		GO:0098793	presynapse (GO:0098793)	CC	718
MGI:104562	HGNC:15751	NAPB	NSF attachment protein beta	SNAP-BETA,SNAPB	GO:0098793	presynapse (GO:0098793)	CC	719
MGI:97550	HGNC:8882	PFN2	profilin 2		GO:0098793	presynapse (GO:0098793)	CC	822
MGI:107765	HGNC:581	APBB1	amyloid beta precursor protein binding family B member 1	FE65,RIR	GO:0098793	presynapse (GO:0098793)	CC	880
MGI:97549	HGNC:8881	PFN1	profilin 1		GO:0098793	presynapse (GO:0098793)	CC	890
MGI:1926252	HGNC:1226	GIPC1	GIPC PDZ domain containing family member 1	TIP-2,HS.6454,GIPC,SEMCAP,GLUT1CBP,SYNECTIN,NIP,C19ORF3,RGS19IP1	GO:0098793	presynapse (GO:0098793)	CC	989
MGI:1345148	HGNC:10750	SEPTIN3	septin 3	SEP3,SEPT3	GO:0098793	presynapse (GO:0098793)	CC	1009
MGI:1195461	HGNC:9164	SEPTIN5	septin 5	HCDCREL-1,H5,PNUTL1,SEPT5	GO:0098793	presynapse (GO:0098793)	CC	1026
MGI:894310	HGNC:16511	SEPTIN8	septin 8	KIAA0202,SEP2,SEPT8	GO:0098793	presynapse (GO:0098793)	CC	1613
MGI:94941	HGNC:3084	DVL1	dishevelled segment polarity protein 1		GO:0098793	presynapse (GO:0098793)	CC	1668
MGI:103574	HGNC:471	AMPH	amphiphysin		GO:0098793	presynapse (GO:0098793)	CC	1692
MGI:1341299	HGNC:29125	DNM3	dynamin 3	KIAA0820	GO:0098793	presynapse (GO:0098793)	CC	1699
MGI:102918	HGNC:2856	DGKQ	diacylglycerol kinase theta	DAGK,DAGK7,DAGK4	GO:0098793	presynapse (GO:0098793)	CC	1751
MGI:105384	HGNC:5241	HSPA8	heat shock protein family A (Hsp70) member 8	HSC71,HSC70,HSP73,HSPA10	GO:0098793	presynapse (GO:0098793)	CC	1761
MGI:1341878	HGNC:3242	EHD1	EH domain containing 1	H-PAST,HPAST1,FLJ42622,FLJ44618,PAST1	GO:0098793	presynapse (GO:0098793)	CC	1762
MGI:104872	HGNC:9283	PPP1CC	protein phosphatase 1 catalytic subunit gamma	PP1C,PP1GAMMA	GO:0098793	presynapse (GO:0098793)	CC	2516
MGI:108109	HGNC:12852	YWHAG	tyrosine 3-monooxygenase/tryptophan 5-monooxygenase activation protein gamma	PPP1R170,14-3-3GAMMA,14-3-3Γ	GO:0098793	presynapse (GO:0098793)	CC	2533
MGI:101919	HGNC:555	AP1G1	adaptor related protein complex 1 subunit gamma 1	CLAPG1,ADTG	GO:0098793	presynapse (GO:0098793)	CC	2539
MGI:109194	HGNC:12853	YWHAH	tyrosine 3-monooxygenase/tryptophan 5-monooxygenase activation protein eta	YWHA1	GO:0098793	presynapse (GO:0098793)	CC	2563
MGI:87918	HGNC:243	ADD1	adducin 1		GO:0098793	presynapse (GO:0098793)	CC	2689
MGI:87919	HGNC:244	ADD2	adducin 2	ADDB	GO:0098793	presynapse (GO:0098793)	CC	2689
MGI:1351615	HGNC:245	ADD3	adducin 3	ADDL	GO:0098793	presynapse (GO:0098793)	CC	2689
MGI:107734	HGNC:568	AP3D1	adaptor related protein complex 3 subunit delta 1	ADTD	GO:0098793	presynapse (GO:0098793)	CC	2740
MGI:2442952	HGNC:20879	CASKIN1	CASK interacting protein 1	KIAA1306,ANKS5A	GO:0098793	presynapse (GO:0098793)	CC	2815
MGI:1346089	HGNC:10003	RGS7	regulator of G protein signaling 7		GO:0098793	presynapse (GO:0098793)	CC	2831
MGI:106334	HGNC:23271	RGS7BP	regulator of G protein signaling 7 binding protein	R7BP	GO:0098793	presynapse (GO:0098793)	CC	2834
MGI:105384	HGNC:5241	HSPA8	heat shock protein family A (Hsp70) member 8	HSC71,HSC70,HSP73,HSPA10	GO:0098793	presynapse (GO:0098793)	CC	2887
MGI:1920344	HGNC:25412	SGIP1	SH3GL interacting endocytic adaptor 1	DKFZP761D221	GO:0098793	presynapse (GO:0098793)	CC	2893
MGI:700010	HGNC:10830	SH3GL1	SH3 domain containing GRB2 like 1, endophilin A2	SH3P8,SH3D2B,CNSA1,EEN,MGC111371	GO:0098793	presynapse (GO:0098793)	CC	2897
MGI:700006	HGNC:2696	DBNL	drebrin like	SH3P7,HIP-55,ABP1	GO:0098793	presynapse (GO:0098793)	CC	3005
MGI:87940	HGNC:289	GRK2	G protein-coupled receptor kinase 2	BARK1,ADRBK1	GO:0098793	presynapse (GO:0098793)	CC	3065
MGI:87941	HGNC:290	GRK3	G protein-coupled receptor kinase 3	BARK2,ADRBK2	GO:0098793	presynapse (GO:0098793)	CC	3067
MGI:97592	HGNC:9380	PRKACA	protein kinase cAMP-activated catalytic subunit alpha	PKACA	GO:0098793	presynapse (GO:0098793)	CC	3822
MGI:107418	HGNC:9677	PTPRN2	protein tyrosine phosphatase receptor type N2	KIAA0387,PHOGRIN,ICAAR,IA-2BETA	GO:0098793	presynapse (GO:0098793)	CC	3946
MGI:107671	HGNC:4460	GPM6A	glycoprotein M6A	GPM6	GO:0098793	presynapse (GO:0098793)	CC	3983
MGI:1914852	HGNC:24539	NECAP1	NECAP endocytosis associated 1	DKFZP566B183	GO:0098793	presynapse (GO:0098793)	CC	4000
MGI:1917188	HGNC:22192	SCRN1	secernin 1	KIAA0193	GO:0098793	presynapse (GO:0098793)	CC	4007
MGI:1920243	HGNC:24035	APPL1	adaptor protein, phosphotyrosine interacting with PH domain and leucine zipper 1	APPL	GO:0098793	presynapse (GO:0098793)	CC	4123
MGI:99435	HGNC:659	ARF6	ADP ribosylation factor 6		GO:0098793	presynapse (GO:0098793)	CC	4128
MGI:99435	HGNC:659	ARF6	ADP ribosylation factor 6		GO:0098793	presynapse (GO:0098793)	CC	4129
MGI:1330281	HGNC:14258	CD2AP	CD2 associated protein	CMS	GO:0098793	presynapse (GO:0098793)	CC	4160
MGI:95639	HGNC:4140	GAP43	growth associated protein 43	B-50,PP46,GAP-43	GO:0098793	presynapse (GO:0098793)	CC	4166
MGI:1921303	HGNC:18708	GRIP1	glutamate receptor interacting protein 1		GO:0098794	postsynapse (GO:0098794)	CC	216
MGI:3044626	HGNC:24163	BEGAIN	brain enriched guanylate kinase associated	KIAA1446	GO:0098794	postsynapse (GO:0098794)	CC	417
MGI:2443075	HGNC:21746	CPEB3	cytoplasmic polyadenylation element binding protein 3	KIAA0940	GO:0098794	postsynapse (GO:0098794)	CC	431
MGI:1338801	HGNC:13759	CYFIP1	cytoplasmic FMR1 interacting protein 1	KIAA0068,P140SRA-1,SHYC	GO:0098794	postsynapse (GO:0098794)	CC	435
MGI:97760	HGNC:9392	PRKAR2B	protein kinase cAMP-dependent type II regulatory subunit beta	PRKAR2	GO:0098794	postsynapse (GO:0098794)	CC	436
MGI:106677	HGNC:10935	SLC18A2	solute carrier family 18 member A2	SVMT,SVAT,VMAT2	GO:0098794	postsynapse (GO:0098794)	CC	475
MGI:1355333	HGNC:7666	NCKAP1	NCK associated protein 1	NAP1,HEM2,NAP125	GO:0098794	postsynapse (GO:0098794)	CC	480
MGI:104860	HGNC:4023	FXR1	FMR1 autosomal homolog 1		GO:0098794	postsynapse (GO:0098794)	CC	503
MGI:1860040	HGNC:10064	TRIM3	tripartite motif containing 3	HAC1,BERP,RNF97,RNF22	GO:0098794	postsynapse (GO:0098794)	CC	509
MGI:1890563	HGNC:12732	WASF1	WASP family member 1	WAVE1,SCAR1,KIAA0269,WAVE	GO:0098794	postsynapse (GO:0098794)	CC	566
MGI:2658986	HGNC:12734	WASF3	WASP family member 3	WAVE3,SCAR3,KIAA0900	GO:0098794	postsynapse (GO:0098794)	CC	568
MGI:104727	HGNC:2309	CPLX1	complexin 1	CPX-I	GO:0098794	postsynapse (GO:0098794)	CC	579
MGI:104727	HGNC:2309	CPLX1	complexin 1	CPX-I	GO:0098794	postsynapse (GO:0098794)	CC	583
MGI:104726	HGNC:2310	CPLX2	complexin 2	CPX-2,DKFZP547D155	GO:0098794	postsynapse (GO:0098794)	CC	585
MGI:95305	HGNC:3287	EIF4E	eukaryotic translation initiation factor 4E	EIF4E1,EIF4EL1,EIF4F	GO:0098794	postsynapse (GO:0098794)	CC	588
MGI:109166	HGNC:3953	NCS1	neuronal calcium sensor 1	NCS-1,FREQ	GO:0098794	postsynapse (GO:0098794)	CC	709
MGI:104562	HGNC:15751	NAPB	NSF attachment protein beta	SNAP-BETA,SNAPB	GO:0098794	postsynapse (GO:0098794)	CC	726
MGI:104563	HGNC:7641	NAPA	NSF attachment protein alpha		GO:0098794	postsynapse (GO:0098794)	CC	727
MGI:97550	HGNC:8882	PFN2	profilin 2		GO:0098794	postsynapse (GO:0098794)	CC	800
MGI:97549	HGNC:8881	PFN1	profilin 1		GO:0098794	postsynapse (GO:0098794)	CC	891
MGI:88107	HGNC:801	ATP1A3	ATPase Na+/K+ transporting subunit alpha 3	DYT12	GO:0098794	postsynapse (GO:0098794)	CC	905
MGI:88258	HGNC:1464	CAMK4	calcium/calmodulin dependent protein kinase IV	CAMK-GR,CAMKIV	GO:0098794	postsynapse (GO:0098794)	CC	924
MGI:1926252	HGNC:1226	GIPC1	GIPC PDZ domain containing family member 1	TIP-2,HS.6454,GIPC,SEMCAP,GLUT1CBP,SYNECTIN,NIP,C19ORF3,RGS19IP1	GO:0098794	postsynapse (GO:0098794)	CC	990
MGI:103079	HGNC:9701	PURA	purine rich element binding protein A	PURALPHA,PUR1,PUR-ALPHA	GO:0098794	postsynapse (GO:0098794)	CC	1343
MGI:95305	HGNC:3287	EIF4E	eukaryotic translation initiation factor 4E	EIF4E1,EIF4EL1,EIF4F	GO:0098794	postsynapse (GO:0098794)	CC	1355
MGI:95305	HGNC:3287	EIF4E	eukaryotic translation initiation factor 4E	EIF4E1,EIF4EL1,EIF4F	GO:0098794	postsynapse (GO:0098794)	CC	1357
MGI:1921252	HGNC:19092	PSD2	pleckstrin and Sec7 domain containing 2	DKFZP761B0514,EFA6C	GO:0098794	postsynapse (GO:0098794)	CC	1359
MGI:95304	HGNC:3285	EIF4B	eukaryotic translation initiation factor 4B		GO:0098794	postsynapse (GO:0098794)	CC	1367
MGI:109198	HGNC:3289	EIF4EBP2	eukaryotic translation initiation factor 4E binding protein 2		GO:0098794	postsynapse (GO:0098794)	CC	1369
MGI:1339975	HGNC:8590	PAK1	p21 (RAC1) activated kinase 1		GO:0098794	postsynapse (GO:0098794)	CC	1377
MGI:1913963	HGNC:169	ACTR2	actin related protein 2	ARP2	GO:0098794	postsynapse (GO:0098794)	CC	1436
MGI:98388	HGNC:11275	SPTBN1	spectrin beta, non-erythrocytic 1		GO:0098794	postsynapse (GO:0098794)	CC	1479
MGI:2384784	HGNC:3296	EIF4G1	eukaryotic translation initiation factor 4 gamma 1	P220,PARK18,EIF4G,EIF4F	GO:0098794	postsynapse (GO:0098794)	CC	1590
MGI:1917171	HGNC:24941	HNRNPA3	heterogeneous nuclear ribonucleoprotein A3	HNRPA3	GO:0098794	postsynapse (GO:0098794)	CC	1594
MGI:99894	HGNC:5044	HNRNPK	heterogeneous nuclear ribonucleoprotein K	CSBP,TUNP,HNRPK	GO:0098794	postsynapse (GO:0098794)	CC	1596
MGI:1277214	HGNC:25589	SEPTIN11	septin 11	FLJ10849,SEPT11	GO:0098794	postsynapse (GO:0098794)	CC	1616
MGI:88248	HGNC:1434	CALB1	calbindin 1	CALB	GO:0098794	postsynapse (GO:0098794)	CC	1624
MGI:102918	HGNC:2856	DGKQ	diacylglycerol kinase theta	DAGK,DAGK7,DAGK4	GO:0098794	postsynapse (GO:0098794)	CC	1752
MGI:1927140	HGNC:4272	GIT1	GIT ArfGAP 1		GO:0098794	postsynapse (GO:0098794)	CC	1781
MGI:1915347	HGNC:24596	DYNLL2	dynein light chain LC8-type 2	MGC17810,DLC2,DNCL1B,RSPH22	GO:0098794	postsynapse (GO:0098794)	CC	1810
MGI:2443679	HGNC:20284	SIPA1L1	signal induced proliferation associated 1 like 1	KIAA0440,E6TP1,SPAR1	GO:0098794	postsynapse (GO:0098794)	CC	1814
MGI:2385902	HGNC:15514	PICALM	phosphatidylinositol binding clathrin assembly protein	CALM,CLTH	GO:0098794	postsynapse (GO:0098794)	CC	2003
MGI:97845	HGNC:9801	RAC1	Rac family small GTPase 1	TC-25,P21-RAC1,RAC-1	GO:0098794	postsynapse (GO:0098794)	CC	2150
MGI:97845	HGNC:9801	RAC1	Rac family small GTPase 1	TC-25,P21-RAC1,RAC-1	GO:0098794	postsynapse (GO:0098794)	CC	2152
MGI:1096342	HGNC:667	RHOA	ras homolog family member A	RHO12,RHOH12,ARH12,ARHA	GO:0098794	postsynapse (GO:0098794)	CC	2217
MGI:1096342	HGNC:667	RHOA	ras homolog family member A	RHO12,RHOH12,ARH12,ARHA	GO:0098794	postsynapse (GO:0098794)	CC	2228
MGI:102522	HGNC:1401	CACNB1	calcium voltage-gated channel auxiliary subunit beta 1	CACNLB1	GO:0098794	postsynapse (GO:0098794)	CC	2281
MGI:101765	HGNC:1774	CDK5	cyclin dependent kinase 5	PSSALRE	GO:0098794	postsynapse (GO:0098794)	CC	2422
MGI:104872	HGNC:9283	PPP1CC	protein phosphatase 1 catalytic subunit gamma	PP1C,PP1GAMMA	GO:0098794	postsynapse (GO:0098794)	CC	2515
MGI:1333763	HGNC:21604	EPN1	epsin 1		GO:0098794	postsynapse (GO:0098794)	CC	2538
MGI:87919	HGNC:244	ADD2	adducin 2	ADDB	GO:0098794	postsynapse (GO:0098794)	CC	2688
MGI:87918	HGNC:243	ADD1	adducin 1		GO:0098794	postsynapse (GO:0098794)	CC	2690
MGI:87919	HGNC:244	ADD2	adducin 2	ADDB	GO:0098794	postsynapse (GO:0098794)	CC	2690
MGI:1351615	HGNC:245	ADD3	adducin 3	ADDL	GO:0098794	postsynapse (GO:0098794)	CC	2690
MGI:107734	HGNC:568	AP3D1	adaptor related protein complex 3 subunit delta 1	ADTD	GO:0098794	postsynapse (GO:0098794)	CC	2742
MGI:106334	HGNC:23271	RGS7BP	regulator of G protein signaling 7 binding protein	R7BP	GO:0098794	postsynapse (GO:0098794)	CC	2832
MGI:105384	HGNC:5241	HSPA8	heat shock protein family A (Hsp70) member 8	HSC71,HSC70,HSP73,HSPA10	GO:0098794	postsynapse (GO:0098794)	CC	2886
MGI:1915919	HGNC:16835	TAOK2	TAO kinase 2	TAO1,KIAA0881,PSK,PSK1,TAO2,MAP3K17	GO:0098794	postsynapse (GO:0098794)	CC	2939
MGI:700009	HGNC:10831	SH3GL2	SH3 domain containing GRB2 like 2, endophilin A1	SH3P4,SH3D2A,CNSA2,EEN-B1	GO:0098794	postsynapse (GO:0098794)	CC	2959
MGI:700006	HGNC:2696	DBNL	drebrin like	SH3P7,HIP-55,ABP1	GO:0098794	postsynapse (GO:0098794)	CC	3004
MGI:1919244	HGNC:2157	CNN3	calponin 3		GO:0098794	postsynapse (GO:0098794)	CC	3010
MGI:95305	HGNC:3287	EIF4E	eukaryotic translation initiation factor 4E	EIF4E1,EIF4EL1,EIF4F	GO:0098794	postsynapse (GO:0098794)	CC	3020
MGI:1352504	HGNC:18415	HIP1R	huntingtin interacting protein 1 related	KIAA0655,HIP3,HIP12,FLJ14000,ILWEQ	GO:0098794	postsynapse (GO:0098794)	CC	3033
MGI:99638	HGNC:3332	MARK2	microtubule affinity regulating kinase 2	PAR-1,PAR1B,PAR-1B,EMK1	GO:0098794	postsynapse (GO:0098794)	CC	3078
MGI:98386	HGNC:11273	SPTAN1	spectrin alpha, non-erythrocytic 1		GO:0098794	postsynapse (GO:0098794)	CC	3084
MGI:3580016	HGNC:16921	AGAP2	ArfGAP with GTPase domain, ankyrin repeat and PH domain 2	CENTG1	GO:0098794	postsynapse (GO:0098794)	CC	3115
MGI:99695	HGNC:3338	CTTN	cortactin	EMS1	GO:0098794	postsynapse (GO:0098794)	CC	3710
MGI:97592	HGNC:9380	PRKACA	protein kinase cAMP-activated catalytic subunit alpha	PKACA	GO:0098794	postsynapse (GO:0098794)	CC	3815
MGI:97760	HGNC:9392	PRKAR2B	protein kinase cAMP-dependent type II regulatory subunit beta	PRKAR2	GO:0098794	postsynapse (GO:0098794)	CC	3954
MGI:97759	HGNC:9390	PRKAR1B	protein kinase cAMP-dependent type I regulatory subunit beta		GO:0098794	postsynapse (GO:0098794)	CC	3955
MGI:109656	HGNC:6513	LASP1	LIM and SH3 protein 1	MLN50,LASP-1	GO:0098794	postsynapse (GO:0098794)	CC	4004
MGI:1915835	HGNC:14085	RTN4	reticulon 4	NSP-CL,KIAA0886,NOGO,ASY	GO:0098794	postsynapse (GO:0098794)	CC	4020
MGI:1915835	HGNC:14085	RTN4	reticulon 4	NSP-CL,KIAA0886,NOGO,ASY	GO:0098794	postsynapse (GO:0098794)	CC	4021
MGI:1920243	HGNC:24035	APPL1	adaptor protein, phosphotyrosine interacting with PH domain and leucine zipper 1	APPL	GO:0098794	postsynapse (GO:0098794)	CC	4124
MGI:97175	HGNC:6839	MAP2	microtubule associated protein 2	MAP2A,MAP2B,MAP2C	GO:0098794	postsynapse (GO:0098794)	CC	4514
MGI:99435	HGNC:659	ARF6	ADP ribosylation factor 6		GO:0098794	postsynapse (GO:0098794)	CC	4529
MGI:95627	HGNC:11042	SLC6A1	solute carrier family 6 member 1	GAT1,GABATR,GABATHG	GO:0098810	neurotransmitter reuptake (GO:0098810)	BP	762
MGI:95627	HGNC:11042	SLC6A1	solute carrier family 6 member 1	GAT1,GABATR,GABATHG	GO:0098810	neurotransmitter reuptake (GO:0098810)	BP	1912
MGI:107734	HGNC:568	AP3D1	adaptor related protein complex 3 subunit delta 1	ADTD	GO:0098830	presynaptic endosome (GO:0098830)	CC	2158
MGI:2157980	HGNC:25507	VAC14	VAC14 component of PIKFYVE complex	FLJ10305,ARPIKFYVE,TAX1BP2	GO:0098830	presynaptic endosome (GO:0098830)	CC	4105
MGI:1916400	HGNC:11175	SNX4	sorting nexin 4	ATG24B	GO:0098830	presynaptic endosome (GO:0098830)	CC	4135
MGI:2152971	HGNC:17282	RIMS1	regulating synaptic membrane exocytosis 1	RIM,KIAA0340,RIM1,RAB3IP2,CORD7	GO:0098831	presynaptic active zone cytoplasmic component (GO:0098831)	CC	60
MGI:2152971	HGNC:17282	RIMS1	regulating synaptic membrane exocytosis 1	RIM,KIAA0340,RIM1,RAB3IP2,CORD7	GO:0098831	presynaptic active zone cytoplasmic component (GO:0098831)	CC	72
MGI:1277955	HGNC:1117	BSN	bassoon presynaptic cytomatrix protein	ZNF231	GO:0098831	presynaptic active zone cytoplasmic component (GO:0098831)	CC	92
MGI:2152971	HGNC:17282	RIMS1	regulating synaptic membrane exocytosis 1	RIM,KIAA0340,RIM1,RAB3IP2,CORD7	GO:0098831	presynaptic active zone cytoplasmic component (GO:0098831)	CC	93
MGI:1277955	HGNC:1117	BSN	bassoon presynaptic cytomatrix protein	ZNF231	GO:0098831	presynaptic active zone cytoplasmic component (GO:0098831)	CC	94
MGI:1349390	HGNC:13406	PCLO	piccolo presynaptic cytomatrix protein	KIAA0559,DKFZP779G1236,ACZ	GO:0098831	presynaptic active zone cytoplasmic component (GO:0098831)	CC	102
MGI:2443235	HGNC:30339	RIMBP2	RIMS binding protein 2	KIAA0318,RBP2,MGC15831,RIM-BP2,PPP1R133	GO:0098831	presynaptic active zone cytoplasmic component (GO:0098831)	CC	111
MGI:1277955	HGNC:1117	BSN	bassoon presynaptic cytomatrix protein	ZNF231	GO:0098831	presynaptic active zone cytoplasmic component (GO:0098831)	CC	121
MGI:2443235	HGNC:30339	RIMBP2	RIMS binding protein 2	KIAA0318,RBP2,MGC15831,RIM-BP2,PPP1R133	GO:0098831	presynaptic active zone cytoplasmic component (GO:0098831)	CC	309
MGI:1349390	HGNC:13406	PCLO	piccolo presynaptic cytomatrix protein	KIAA0559,DKFZP779G1236,ACZ	GO:0098831	presynaptic active zone cytoplasmic component (GO:0098831)	CC	313
MGI:2151013	HGNC:17072	ERC1	ELKS/RAB6-interacting/CAST family member 1	ELKS,KIAA1081,CAST2,MGC12974,RAB6IP2	GO:0098831	presynaptic active zone cytoplasmic component (GO:0098831)	CC	329
MGI:1098749	HGNC:31922	ERC2	ELKS/RAB6-interacting/CAST family member 2	CAST,CAST1,KIAA0378,SPBC110,SPC110,ELKSL	GO:0098831	presynaptic active zone cytoplasmic component (GO:0098831)	CC	330
MGI:1201685	HGNC:2494	CTBP1	C-terminal binding protein 1	BARS	GO:0098831	presynaptic active zone cytoplasmic component (GO:0098831)	CC	373
MGI:1201685	HGNC:2494	CTBP1	C-terminal binding protein 1	BARS	GO:0098831	presynaptic active zone cytoplasmic component (GO:0098831)	CC	923
MGI:88275	HGNC:2510	CTNNA2	catenin alpha 2	CAP-R,CT114	GO:0098831	presynaptic active zone cytoplasmic component (GO:0098831)	CC	994
MGI:1924037	HGNC:9247	PPFIA3	PTPRF interacting protein alpha 3	KIAA0654,LPNA3,MGC126567,MGC126569	GO:0098831	presynaptic active zone cytoplasmic component (GO:0098831)	CC	2734
MGI:1098749	HGNC:31922	ERC2	ELKS/RAB6-interacting/CAST family member 2	CAST,CAST1,KIAA0378,SPBC110,SPC110,ELKSL	GO:0098831	presynaptic active zone cytoplasmic component (GO:0098831)	CC	2736
MGI:1349390	HGNC:13406	PCLO	piccolo presynaptic cytomatrix protein	KIAA0559,DKFZP779G1236,ACZ	GO:0098831	presynaptic active zone cytoplasmic component (GO:0098831)	CC	4118
MGI:107363	HGNC:11444	STXBP1	syntaxin binding protein 1	HUNC18,MUNC18-1,UNC18,RBSEC1	GO:0098831	presynaptic active zone cytoplasmic component (GO:0098831)	CC	4170
MGI:1345181	HGNC:8570	PACSIN1	protein kinase C and casein kinase substrate in neurons 1	SDPI	GO:0098833	presynaptic endocytic zone (GO:0098833)	CC	1700
MGI:1338069	HGNC:6183	ITSN1	intersectin 1	SH3P17,MGC134948,MGC134949,SH3D1A,ITSN	GO:0098833	presynaptic endocytic zone (GO:0098833)	CC	1707
MGI:103574	HGNC:471	AMPH	amphiphysin		GO:0098833	presynaptic endocytic zone (GO:0098833)	CC	2001
MGI:2388633	HGNC:2092	CLTC	clathrin heavy chain	HC,CLTCL2	GO:0098835	presynaptic endocytic zone membrane (GO:0098835)	CC	665
MGI:1298224	HGNC:8996	PIP5K1C	phosphatidylinositol-4-phosphate 5-kinase type 1 gamma	PIP5KGAMMA,KIAA0589,LCCS3	GO:0098835	presynaptic endocytic zone membrane (GO:0098835)	CC	734
MGI:107384	HGNC:2972	DNM1	dynamin 1	DNM	GO:0098835	presynaptic endocytic zone membrane (GO:0098835)	CC	1703
MGI:107384	HGNC:2972	DNM1	dynamin 1	DNM	GO:0098835	presynaptic endocytic zone membrane (GO:0098835)	CC	1704
MGI:1921256	HGNC:2973	DNM1L	dynamin 1 like	DRP1,DVLP,HDYNIV,DYMPLE,VPS1	GO:0098835	presynaptic endocytic zone membrane (GO:0098835)	CC	1795
MGI:1921575	HGNC:2091	CLTB	clathrin light chain B	LCB	GO:0098835	presynaptic endocytic zone membrane (GO:0098835)	CC	1817
MGI:894297	HGNC:2090	CLTA	clathrin light chain A	LCA	GO:0098835	presynaptic endocytic zone membrane (GO:0098835)	CC	1818
MGI:1345181	HGNC:8570	PACSIN1	protein kinase C and casein kinase substrate in neurons 1	SDPI	GO:0098839	postsynaptic density membrane (GO:0098839)	CC	2848
MGI:2385131	HGNC:10834	SH3GLB2	SH3 domain containing GRB2 like, endophilin B2	KIAA1848	GO:0098843	postsynaptic endocytic zone (GO:0098843)	CC	2862
MGI:894297	HGNC:2090	CLTA	clathrin light chain A	LCA	GO:0098843	postsynaptic endocytic zone (GO:0098843)	CC	2878
MGI:894645	HGNC:9394	PICK1	protein interacting with PRKCA 1	DJ1039K5,MGC15204,PRKCABP	GO:0098843	postsynaptic endocytic zone (GO:0098843)	CC	2916
MGI:105926	HGNC:9783	RAB5A	RAB5A, member RAS oncogene family	RAB5	GO:0098844	postsynaptic endocytic zone membrane (GO:0098844)	CC	2861
MGI:1341299	HGNC:29125	DNM3	dynamin 3	KIAA0820	GO:0098844	postsynaptic endocytic zone membrane (GO:0098844)	CC	2877
MGI:98460	HGNC:11494	SYN1	synapsin I	MRX50	GO:0098850	extrinsic component of synaptic vesicle membrane (GO:0098850)	CC	317
MGI:103574	HGNC:471	AMPH	amphiphysin		GO:0098850	extrinsic component of synaptic vesicle membrane (GO:0098850)	CC	645
MGI:2388633	HGNC:2092	CLTC	clathrin heavy chain	HC,CLTCL2	GO:0098850	extrinsic component of synaptic vesicle membrane (GO:0098850)	CC	656
MGI:1098703	HGNC:10819	SGTA	small glutamine rich tetratricopeptide repeat containing alpha	SGT	GO:0098850	extrinsic component of synaptic vesicle membrane (GO:0098850)	CC	1094
MGI:98460	HGNC:11494	SYN1	synapsin I	MRX50	GO:0098850	extrinsic component of synaptic vesicle membrane (GO:0098850)	CC	1231
MGI:102788	HGNC:17056	RPH3A	rabphilin 3A	KIAA0985,RABPHILIN,EXOPHILIN-1	GO:0098850	extrinsic component of synaptic vesicle membrane (GO:0098850)	CC	1404
MGI:102788	HGNC:17056	RPH3A	rabphilin 3A	KIAA0985,RABPHILIN,EXOPHILIN-1	GO:0098850	extrinsic component of synaptic vesicle membrane (GO:0098850)	CC	1405
MGI:108092	HGNC:1052	BIN1	bridging integrator 1	SH3P9,AMPH2,AMPHL	GO:0098850	extrinsic component of synaptic vesicle membrane (GO:0098850)	CC	1495
MGI:95640	HGNC:4141	GAPDH	glyceraldehyde-3-phosphate dehydrogenase	GAPD	GO:0098850	extrinsic component of synaptic vesicle membrane (GO:0098850)	CC	2348
MGI:1914724	HGNC:11133	SNAP29	synaptosome associated protein 29	SNAP-29,CEDNIK	GO:0098850	extrinsic component of synaptic vesicle membrane (GO:0098850)	CC	3717
MGI:98460	HGNC:11494	SYN1	synapsin I	MRX50	GO:0098850	extrinsic component of synaptic vesicle membrane (GO:0098850)	CC	4117
MGI:1915058	HGNC:27007	TPRG1L	tumor protein p63 regulated 1 like	RP11-46F15.3,FLJ21811,FAM79A	GO:0098850	extrinsic component of synaptic vesicle membrane (GO:0098850)	CC	4183
MGI:1201780	HGNC:851	ATP6V1A	ATPase H+ transporting V1 subunit A	VMA1,VA68,VPP2,ATP6A1,ATP6V1A1	GO:0098850	extrinsic component of synaptic vesicle membrane (GO:0098850)	CC	4491
MGI:109618	HGNC:854	ATP6V1B2	ATPase H+ transporting V1 subunit B2	VATB,VMA2,HO57,VPP3,ATP6B2	GO:0098850	extrinsic component of synaptic vesicle membrane (GO:0098850)	CC	4492
MGI:1921084	HGNC:13527	ATP6V1D	ATPase H+ transporting V1 subunit D	VATD,VMA8,ATP6M	GO:0098850	extrinsic component of synaptic vesicle membrane (GO:0098850)	CC	4494
MGI:894326	HGNC:857	ATP6V1E1	ATPase H+ transporting V1 subunit E1	P31,VMA4,ATP6E2,ATP6E,ATP6V1E	GO:0098850	extrinsic component of synaptic vesicle membrane (GO:0098850)	CC	4495
MGI:1913394	HGNC:16832	ATP6V1F	ATPase H+ transporting V1 subunit F	ATP6S14,VATF,VMA7	GO:0098850	extrinsic component of synaptic vesicle membrane (GO:0098850)	CC	4496
MGI:1913487	HGNC:862	ATP6V1G2	ATPase H+ transporting V1 subunit G2	VMA10,NG38,EM:AC004181.3,ATP6G,ATP6G2	GO:0098850	extrinsic component of synaptic vesicle membrane (GO:0098850)	CC	4500
MGI:1914864	HGNC:18303	ATP6V1H	ATPase H+ transporting V1 subunit H	CGI-11,SFD,VMA13,SFDALPHA,SFDBETA	GO:0098850	extrinsic component of synaptic vesicle membrane (GO:0098850)	CC	4504
MGI:99695	HGNC:3338	CTTN	cortactin	EMS1	GO:0098871	postsynaptic actin cytoskeleton (GO:0098871)	CC	223
MGI:1931838	HGNC:2695	DBN1	drebrin 1	D0S117E	GO:0098871	postsynaptic actin cytoskeleton (GO:0098871)	CC	229
MGI:106913	HGNC:24011	ABI2	abl interactor 2	ABI-2,AIP-1,ABI2B,ABLBP3,ARGBPIA,SSH3BP2	GO:0098871	postsynaptic actin cytoskeleton (GO:0098871)	CC	548
MGI:87904	HGNC:132	ACTB	actin beta		GO:0098871	postsynaptic actin cytoskeleton (GO:0098871)	CC	814
MGI:87906	HGNC:144	ACTG1	actin gamma 1	ACTG,DFNA20,DFNA26	GO:0098871	postsynaptic actin cytoskeleton (GO:0098871)	CC	815
MGI:99695	HGNC:3338	CTTN	cortactin	EMS1	GO:0098871	postsynaptic actin cytoskeleton (GO:0098871)	CC	995
MGI:1338069	HGNC:6183	ITSN1	intersectin 1	SH3P17,MGC134948,MGC134949,SH3D1A,ITSN	GO:0098871	postsynaptic actin cytoskeleton (GO:0098871)	CC	1442
MGI:1930780	HGNC:7568	MYH10	myosin heavy chain 10	NMMHCB	GO:0098871	postsynaptic actin cytoskeleton (GO:0098871)	CC	2891
MGI:1351338	HGNC:4593	GRM1	glutamate metabotropic receptor 1	GPRC1A,MGLU1,MGLUR1,PPP1R85	GO:0098872	G-protein coupled neurotransmitter receptor activity involved in regulation of postsynaptic cytosolic calcium levels (GO:0098872)	BP	214
MGI:1354953	HGNC:18957	MAGI2	membrane associated guanylate kinase, WW and PDZ domain containing 2	AIP1,ARIP1,KIAA0705,ACVRIP1,MAGI-2	GO:0098879	structural constituent of postsynaptic specialization (GO:0098879)	BP	1749
MGI:1927140	HGNC:4272	GIT1	GIT ArfGAP 1		GO:0098879	structural constituent of postsynaptic specialization (GO:0098879)	BP	1782
MGI:1889272	HGNC:5951	CADM1	cell adhesion molecule 1	NECL2,ST17,BL2,SYNCAM,IGSF4A,NECL-2,SYNCAM1,RA175,TSLC1,IGSF4	GO:0098880	maintenance of postsynaptic specialization structure (GO:0098880)	BP	230
MGI:105384	HGNC:5241	HSPA8	heat shock protein family A (Hsp70) member 8	HSC71,HSC70,HSP73,HSPA10	GO:0098880	maintenance of postsynaptic specialization structure (GO:0098880)	BP	2912
MGI:2152971	HGNC:17282	RIMS1	regulating synaptic membrane exocytosis 1	RIM,KIAA0340,RIM1,RAB3IP2,CORD7	GO:0098882	structural constituent of active zone (GO:0098882)	BP	63
MGI:1349390	HGNC:13406	PCLO	piccolo presynaptic cytomatrix protein	KIAA0559,DKFZP779G1236,ACZ	GO:0098882	structural constituent of active zone (GO:0098882)	BP	103
MGI:2443235	HGNC:30339	RIMBP2	RIMS binding protein 2	KIAA0318,RBP2,MGC15831,RIM-BP2,PPP1R133	GO:0098882	structural constituent of active zone (GO:0098882)	BP	112
MGI:1277955	HGNC:1117	BSN	bassoon presynaptic cytomatrix protein	ZNF231	GO:0098882	structural constituent of active zone (GO:0098882)	BP	122
MGI:2152971	HGNC:17282	RIMS1	regulating synaptic membrane exocytosis 1	RIM,KIAA0340,RIM1,RAB3IP2,CORD7	GO:0098882	structural constituent of active zone (GO:0098882)	BP	400
MGI:2151013	HGNC:17072	ERC1	ELKS/RAB6-interacting/CAST family member 1	ELKS,KIAA1081,CAST2,MGC12974,RAB6IP2	GO:0098882	structural constituent of active zone (GO:0098882)	BP	402
MGI:1098749	HGNC:31922	ERC2	ELKS/RAB6-interacting/CAST family member 2	CAST,CAST1,KIAA0378,SPBC110,SPC110,ELKSL	GO:0098882	structural constituent of active zone (GO:0098882)	BP	403
MGI:1277955	HGNC:1117	BSN	bassoon presynaptic cytomatrix protein	ZNF231	GO:0098882	structural constituent of active zone (GO:0098882)	BP	410
MGI:98277	HGNC:3388	EPHA4	EPH receptor A4	HEK8,TYRO1	GO:0098883	synapse disassembly (GO:0098883)	BP	301
MGI:1919020	HGNC:563	AP2B1	adaptor related protein complex 2 subunit beta 1	ADTB2,CLAPB1	GO:0098884	postsynaptic neurotransmitter receptor endocytosis (GO:0098884)	BP	2157
MGI:1298405	HGNC:564	AP2M1	adaptor related protein complex 2 subunit mu 1	AP50,MU2,CLAPM1	GO:0098884	postsynaptic neurotransmitter receptor endocytosis (GO:0098884)	BP	2225
MGI:1298405	HGNC:564	AP2M1	adaptor related protein complex 2 subunit mu 1	AP50,MU2,CLAPM1	GO:0098884	postsynaptic neurotransmitter receptor endocytosis (GO:0098884)	BP	2859
MGI:105926	HGNC:9783	RAB5A	RAB5A, member RAS oncogene family	RAB5	GO:0098884	postsynaptic neurotransmitter receptor endocytosis (GO:0098884)	BP	2975
MGI:2385131	HGNC:10834	SH3GLB2	SH3 domain containing GRB2 like, endophilin B2	KIAA1848	GO:0098884	postsynaptic neurotransmitter receptor endocytosis (GO:0098884)	BP	2977
MGI:1919020	HGNC:563	AP2B1	adaptor related protein complex 2 subunit beta 1	ADTB2,CLAPB1	GO:0098884	postsynaptic neurotransmitter receptor endocytosis (GO:0098884)	BP	3943
MGI:101757	HGNC:1874	CFL1	cofilin 1	CFL	GO:0098885	modification of postsynaptic actin cytoskeleton (GO:0098885)	BP	507
MGI:2658986	HGNC:12734	WASF3	WASP family member 3	WAVE3,SCAR3,KIAA0900	GO:0098885	modification of postsynaptic actin cytoskeleton (GO:0098885)	BP	569
MGI:1890563	HGNC:12732	WASF1	WASP family member 1	WAVE1,SCAR1,KIAA0269,WAVE	GO:0098885	modification of postsynaptic actin cytoskeleton (GO:0098885)	BP	571
MGI:99695	HGNC:3338	CTTN	cortactin	EMS1	GO:0098885	modification of postsynaptic actin cytoskeleton (GO:0098885)	BP	766
MGI:88275	HGNC:2510	CTNNA2	catenin alpha 2	CAP-R,CT114	GO:0098885	modification of postsynaptic actin cytoskeleton (GO:0098885)	BP	996
MGI:99695	HGNC:3338	CTTN	cortactin	EMS1	GO:0098885	modification of postsynaptic actin cytoskeleton (GO:0098885)	BP	1005
MGI:97549	HGNC:8881	PFN1	profilin 1		GO:0098885	modification of postsynaptic actin cytoskeleton (GO:0098885)	BP	1790
MGI:97550	HGNC:8882	PFN2	profilin 2		GO:0098885	modification of postsynaptic actin cytoskeleton (GO:0098885)	BP	1791
MGI:1921303	HGNC:18708	GRIP1	glutamate receptor interacting protein 1		GO:0098887	neurotransmitter receptor transport, endosome to postsynaptic membrane (GO:0098887)	BP	948
MGI:98331	HGNC:11132	SNAP25	synaptosome associated protein 25	SNAP-25,RIC-4,RIC4,SEC9,BA416N4.2,DJ1068F16.2,SNAP	GO:0098888	extrinsic component of presynaptic membrane (GO:0098888)	CC	38
MGI:107363	HGNC:11444	STXBP1	syntaxin binding protein 1	HUNC18,MUNC18-1,UNC18,RBSEC1	GO:0098888	extrinsic component of presynaptic membrane (GO:0098888)	CC	84
MGI:88275	HGNC:2510	CTNNA2	catenin alpha 2	CAP-R,CT114	GO:0098888	extrinsic component of presynaptic membrane (GO:0098888)	CC	1776
MGI:1354953	HGNC:18957	MAGI2	membrane associated guanylate kinase, WW and PDZ domain containing 2	AIP1,ARIP1,KIAA0705,ACVRIP1,MAGI-2	GO:0098890	extrinsic component of postsynaptic membrane (GO:0098890)	CC	542
MGI:88275	HGNC:2510	CTNNA2	catenin alpha 2	CAP-R,CT114	GO:0098890	extrinsic component of postsynaptic membrane (GO:0098890)	CC	1775
MGI:2446216	HGNC:13581	FBXO2	F-box protein 2	FBX2,NFB42,FBS1,FBG1,OCP1	GO:0098890	extrinsic component of postsynaptic membrane (GO:0098890)	CC	2466
MGI:1347075	HGNC:7648	NBEA	neurobeachin	KIAA1544,BCL8B,FLJ10197,LYST2	GO:0098890	extrinsic component of postsynaptic membrane (GO:0098890)	CC	4206
MGI:2152971	HGNC:17282	RIMS1	regulating synaptic membrane exocytosis 1	RIM,KIAA0340,RIM1,RAB3IP2,CORD7	GO:0098891	extrinsic component of presynaptic active zone membrane (GO:0098891)	CC	3958
MGI:1333763	HGNC:21604	EPN1	epsin 1		GO:0098894	extrinsic component of presynaptic endocytic zone membrane (GO:0098894)	CC	1362
MGI:2385902	HGNC:15514	PICALM	phosphatidylinositol binding clathrin assembly protein	CALM,CLTH	GO:0098894	extrinsic component of presynaptic endocytic zone membrane (GO:0098894)	CC	1693
MGI:109132	HGNC:14986	SNAP91	synaptosome associated protein 91	KIAA0656,AP180,CALM	GO:0098894	extrinsic component of presynaptic endocytic zone membrane (GO:0098894)	CC	1706
MGI:103574	HGNC:471	AMPH	amphiphysin		GO:0098894	extrinsic component of presynaptic endocytic zone membrane (GO:0098894)	CC	2077
MGI:1298405	HGNC:564	AP2M1	adaptor related protein complex 2 subunit mu 1	AP50,MU2,CLAPM1	GO:0098894	extrinsic component of presynaptic endocytic zone membrane (GO:0098894)	CC	3938
MGI:1919020	HGNC:563	AP2B1	adaptor related protein complex 2 subunit beta 1	ADTB2,CLAPB1	GO:0098894	extrinsic component of presynaptic endocytic zone membrane (GO:0098894)	CC	3940
MGI:1201685	HGNC:2494	CTBP1	C-terminal binding protein 1	BARS	GO:0098894	extrinsic component of presynaptic endocytic zone membrane (GO:0098894)	CC	4144
MGI:1919935	HGNC:15469	DNAJC6	DnaJ heat shock protein family (Hsp40) member C6	KIAA0473,PARK19	GO:0098894	extrinsic component of presynaptic endocytic zone membrane (GO:0098894)	CC	4164
MGI:3613677	HGNC:15474	SHANK1	SH3 and multiple ankyrin repeat domains 1	SSTRIP,SPANK-1,SYNAMON	GO:0098919	structural constituent of postsynaptic density (GO:0098919)	BP	1373
MGI:1354953	HGNC:18957	MAGI2	membrane associated guanylate kinase, WW and PDZ domain containing 2	AIP1,ARIP1,KIAA0705,ACVRIP1,MAGI-2	GO:0098919	structural constituent of postsynaptic density (GO:0098919)	BP	1887
MGI:2671987	HGNC:14295	SHANK2	SH3 and multiple ankyrin repeat domains 2	CTTNBP1,PROSAP1,SHANK,SPANK-3,CORTBP1	GO:0098919	structural constituent of postsynaptic density (GO:0098919)	BP	1958
MGI:1277959	HGNC:2903	DLG4	discs large MAGUK scaffold protein 4	PSD-95,PSD95,SAP90,SAP-90	GO:0098919	structural constituent of postsynaptic density (GO:0098919)	BP	2375
MGI:107231	HGNC:2900	DLG1	discs large MAGUK scaffold protein 1	SAP97,SAP-97,HDLG,DLGH1,DJ1061C18.1.1	GO:0098919	structural constituent of postsynaptic density (GO:0098919)	BP	2725
MGI:1195966	HGNC:2516	CTNND2	catenin delta 2	NPRAP,GT24	GO:0098919	structural constituent of postsynaptic density (GO:0098919)	BP	2967
MGI:97306	HGNC:7765	NF1	neurofibromin 1		GO:0098926	postsynaptic signaling pathway (GO:0098926)	BP	3080
MGI:103309	HGNC:3758	FLOT2	flotillin 2	ESA,ESA1,ECS-1,ECS1,M17S1	GO:0098937	anterograde dendritic transport (GO:0098937)	BP	262
MGI:1890563	HGNC:12732	WASF1	WASP family member 1	WAVE1,SCAR1,KIAA0269,WAVE	GO:0098939	dendritic transport of mitochondrion (GO:0098939)	BP	570
MGI:1889272	HGNC:5951	CADM1	cell adhesion molecule 1	NECL2,ST17,BL2,SYNCAM,IGSF4A,NECL-2,SYNCAM1,RA175,TSLC1,IGSF4	GO:0098942	retrograde trans-synaptic signaling by trans-synaptic protein complex (GO:0098942)	BP	1019
MGI:107734	HGNC:568	AP3D1	adaptor related protein complex 3 subunit delta 1	ADTD	GO:0098943	neurotransmitter receptor transport, postsynaptic endosome to lysosome (GO:0098943)	BP	2226
MGI:3044626	HGNC:24163	BEGAIN	brain enriched guanylate kinase associated	KIAA1446	GO:0098962	regulation of postsynaptic neurotransmitter receptor activity (GO:0098962)	BP	1715
MGI:1096362	HGNC:8009	NRXN2	neurexin 2		GO:0098962	regulation of postsynaptic neurotransmitter receptor activity (GO:0098962)	BP	4092
MGI:103079	HGNC:9701	PURA	purine rich element binding protein A	PURALPHA,PUR1,PUR-ALPHA	GO:0098963	dendritic transport of messenger ribonucleoprotein complex (GO:0098963)	BP	1344
MGI:1915076	HGNC:30669	SNAP47	synaptosome associated protein 47	SVAP1,SNAP-47,C1ORF142	GO:0098967	exocytic insertion of neurotransmitter receptor to postsynaptic membrane (GO:0098967)	BP	2163
MGI:1933169	HGNC:17059	SACM1L	SAC1 like phosphatidylinositide phosphatase	SAC1,KIAA0851	GO:0098967	exocytic insertion of neurotransmitter receptor to postsynaptic membrane (GO:0098967)	BP	4527
MGI:1933169	HGNC:17059	SACM1L	SAC1 like phosphatidylinositide phosphatase	SAC1,KIAA0851	GO:0098969	neurotransmitter receptor transport to postsynaptic membrane (GO:0098969)	BP	2574
MGI:1346863	HGNC:6872	MAPK10	mitogen-activated protein kinase 10	JNK3,P493F12,P54BSAPK,PRKM10	GO:0098969	neurotransmitter receptor transport to postsynaptic membrane (GO:0098969)	BP	2719
MGI:109564	HGNC:6323	KIF5A	kinesin family member 5A	D12S1889,NKHC,MY050,SPG10	GO:0098971	anterograde dendritic transport of neurotransmitter receptor complex (GO:0098971)	BP	2141
MGI:87904	HGNC:132	ACTB	actin beta		GO:0098973	structural constituent of postsynaptic actin cytoskeleton (GO:0098973)	BP	812
MGI:87906	HGNC:144	ACTG1	actin gamma 1	ACTG,DFNA20,DFNA26	GO:0098973	structural constituent of postsynaptic actin cytoskeleton (GO:0098973)	BP	816
MGI:87906	HGNC:144	ACTG1	actin gamma 1	ACTG,DFNA20,DFNA26	GO:0098973	structural constituent of postsynaptic actin cytoskeleton (GO:0098973)	BP	818
MGI:88257	HGNC:1461	CAMK2B	calcium/calmodulin dependent protein kinase II beta	CAM2,CAMK2,CAMKIIΒ,CAMKB	GO:0098973	structural constituent of postsynaptic actin cytoskeleton (GO:0098973)	BP	947
MGI:700006	HGNC:2696	DBNL	drebrin like	SH3P7,HIP-55,ABP1	GO:0098973	structural constituent of postsynaptic actin cytoskeleton (GO:0098973)	BP	3006
MGI:106913	HGNC:24011	ABI2	abl interactor 2	ABI-2,AIP-1,ABI2B,ABLBP3,ARGBPIA,SSH3BP2	GO:0098974	postsynaptic actin cytoskeleton organization (GO:0098974)	BP	1602
MGI:107926	HGNC:10252	ROCK2	Rho associated coiled-coil containing protein kinase 2		GO:0098974	postsynaptic actin cytoskeleton organization (GO:0098974)	BP	1788
MGI:2443679	HGNC:20284	SIPA1L1	signal induced proliferation associated 1 like 1	KIAA0440,E6TP1,SPAR1	GO:0098974	postsynaptic actin cytoskeleton organization (GO:0098974)	BP	1815
MGI:1931838	HGNC:2695	DBN1	drebrin 1	D0S117E	GO:0098974	postsynaptic actin cytoskeleton organization (GO:0098974)	BP	1924
MGI:97845	HGNC:9801	RAC1	Rac family small GTPase 1	TC-25,P21-RAC1,RAC-1	GO:0098974	postsynaptic actin cytoskeleton organization (GO:0098974)	BP	2791
MGI:1930780	HGNC:7568	MYH10	myosin heavy chain 10	NMMHCB	GO:0098974	postsynaptic actin cytoskeleton organization (GO:0098974)	BP	2892
MGI:700009	HGNC:10831	SH3GL2	SH3 domain containing GRB2 like 2, endophilin A1	SH3P4,SH3D2A,CNSA2,EEN-B1	GO:0098974	postsynaptic actin cytoskeleton organization (GO:0098974)	BP	2960
MGI:700006	HGNC:2696	DBNL	drebrin like	SH3P7,HIP-55,ABP1	GO:0098974	postsynaptic actin cytoskeleton organization (GO:0098974)	BP	3007
MGI:1334445	HGNC:2319	CPNE6	copine 6		GO:0098974	postsynaptic actin cytoskeleton organization (GO:0098974)	BP	4005
MGI:2444630	HGNC:2938	DMXL2	Dmx like 2	RC3,KIAA0856,DFNA71	GO:0098992	neuronal dense core vesicle (GO:0098992)	CC	478
MGI:106677	HGNC:10935	SLC18A2	solute carrier family 18 member A2	SVMT,SVAT,VMAT2	GO:0098992	neuronal dense core vesicle (GO:0098992)	CC	1149
MGI:2443815	HGNC:30757	STXBP5L	syntaxin binding protein 5 like	KIAA1006,LLGL4	GO:0098992	neuronal dense core vesicle (GO:0098992)	CC	1256
MGI:95772	HGNC:4385	GNAI2	G protein subunit alpha i2	GIP,GNAI2B	GO:0098992	neuronal dense core vesicle (GO:0098992)	CC	4040
MGI:88295	HGNC:1399	CACNA2D1	calcium voltage-gated channel auxiliary subunit alpha2delta 1	LNCRNA-N3,CACNL2A,CACNA2,MHS3,LINC01112	GO:0098992	neuronal dense core vesicle (GO:0098992)	CC	4042
MGI:94941	HGNC:3084	DVL1	dishevelled segment polarity protein 1		GO:0098992	neuronal dense core vesicle (GO:0098992)	CC	4046
MGI:1931295	HGNC:9767	RAB27B	RAB27B, member RAS oncogene family		GO:0098993	anchored component of synaptic vesicle membrane (GO:0098993)	CC	43
MGI:97843	HGNC:9777	RAB3A	RAB3A, member RAS oncogene family		GO:0098993	anchored component of synaptic vesicle membrane (GO:0098993)	CC	47
MGI:97843	HGNC:9777	RAB3A	RAB3A, member RAS oncogene family		GO:0098993	anchored component of synaptic vesicle membrane (GO:0098993)	CC	48
MGI:1917158	HGNC:9778	RAB3B	RAB3B, member RAS oncogene family		GO:0098993	anchored component of synaptic vesicle membrane (GO:0098993)	CC	49
MGI:1914545	HGNC:30269	RAB3C	RAB3C, member RAS oncogene family		GO:0098993	anchored component of synaptic vesicle membrane (GO:0098993)	CC	59
MGI:892995	HGNC:16235	DNAJC5	DnaJ heat shock protein family (Hsp40) member C5	FLJ00118,FLJ13070,DNAJC5A,CLN4	GO:0098993	anchored component of synaptic vesicle membrane (GO:0098993)	CC	123
MGI:105926	HGNC:9783	RAB5A	RAB5A, member RAS oncogene family	RAB5	GO:0098993	anchored component of synaptic vesicle membrane (GO:0098993)	CC	126
MGI:105938	HGNC:9784	RAB5B	RAB5B, member RAS oncogene family		GO:0098993	anchored component of synaptic vesicle membrane (GO:0098993)	CC	127
MGI:105306	HGNC:9785	RAB5C	RAB5C, member RAS oncogene family	RAB5CL,RABL	GO:0098993	anchored component of synaptic vesicle membrane (GO:0098993)	CC	134
MGI:1924657	HGNC:9774	RAB35	RAB35, member RAS oncogene family	H-RAY	GO:0098993	anchored component of synaptic vesicle membrane (GO:0098993)	CC	137
MGI:105069	HGNC:9781	RAB4A	RAB4A, member RAS oncogene family	HRES-1/RAB4,RAB4	GO:0098993	anchored component of synaptic vesicle membrane (GO:0098993)	CC	195
MGI:1915615	HGNC:16524	RAB14	RAB14, member RAS oncogene family	FBP,RAB-14	GO:0098993	anchored component of synaptic vesicle membrane (GO:0098993)	CC	196
MGI:1928750	HGNC:9763	RAB2A	RAB2A, member RAS oncogene family	RAB2	GO:0098993	anchored component of synaptic vesicle membrane (GO:0098993)	CC	243
MGI:892995	HGNC:16235	DNAJC5	DnaJ heat shock protein family (Hsp40) member C5	FLJ00118,FLJ13070,DNAJC5A,CLN4	GO:0098993	anchored component of synaptic vesicle membrane (GO:0098993)	CC	673
MGI:1917158	HGNC:9778	RAB3B	RAB3B, member RAS oncogene family		GO:0098993	anchored component of synaptic vesicle membrane (GO:0098993)	CC	2431
MGI:1859616	HGNC:18706	GRIPAP1	GRIP1 associated protein 1	GRASP-1,GRASP1,KIAA1167,MPMGP800B12492Q3,DKFZP434P0630	GO:0098998	extrinsic component of postsynaptic early endosome membrane (GO:0098998)	CC	228
MGI:1928395	HGNC:11172	SNX1	sorting nexin 1	SNX1A,MGC8664,HST17379,VPS5	GO:0098999	extrinsic component of postsynaptic endosome membrane (GO:0098999)	CC	203
MGI:99695	HGNC:3338	CTTN	cortactin	EMS1	GO:0099010	modification of postsynaptic structure (GO:0099010)	BP	3712
MGI:88295	HGNC:1399	CACNA2D1	calcium voltage-gated channel auxiliary subunit alpha2delta 1	LNCRNA-N3,CACNL2A,CACNA2,MHS3,LINC01112	GO:0099025	anchored component of postsynaptic membrane (GO:0099025)	CC	464
MGI:96907	HGNC:6759	MARCKS	myristoylated alanine rich protein kinase C substrate	PKCSL,80K-L,MACS	GO:0099025	anchored component of postsynaptic membrane (GO:0099025)	CC	828
MGI:104518	HGNC:2172	CNTN2	contactin 2	TAG-1,TAX1,TAX,AXT	GO:0099025	anchored component of postsynaptic membrane (GO:0099025)	CC	937
MGI:98331	HGNC:11132	SNAP25	synaptosome associated protein 25	SNAP-25,RIC-4,RIC4,SEC9,BA416N4.2,DJ1068F16.2,SNAP	GO:0099026	anchored component of presynaptic membrane (GO:0099026)	CC	274
MGI:96907	HGNC:6759	MARCKS	myristoylated alanine rich protein kinase C substrate	PKCSL,80K-L,MACS	GO:0099026	anchored component of presynaptic membrane (GO:0099026)	CC	827
MGI:106334	HGNC:23271	RGS7BP	regulator of G protein signaling 7 binding protein	R7BP	GO:0099026	anchored component of presynaptic membrane (GO:0099026)	CC	2704
MGI:103309	HGNC:3758	FLOT2	flotillin 2	ESA,ESA1,ECS-1,ECS1,M17S1	GO:0099029	anchored component of presynaptic active zone membrane (GO:0099029)	CC	261
MGI:88295	HGNC:1399	CACNA2D1	calcium voltage-gated channel auxiliary subunit alpha2delta 1	LNCRNA-N3,CACNL2A,CACNA2,MHS3,LINC01112	GO:0099029	anchored component of presynaptic active zone membrane (GO:0099029)	CC	344
MGI:1277959	HGNC:2903	DLG4	discs large MAGUK scaffold protein 4	PSD-95,PSD95,SAP90,SAP-90	GO:0099031	anchored component of postsynaptic density membrane (GO:0099031)	CC	2051
MGI:106334	HGNC:23271	RGS7BP	regulator of G protein signaling 7 binding protein	R7BP	GO:0099031	anchored component of postsynaptic density membrane (GO:0099031)	CC	2703
MGI:94941	HGNC:3084	DVL1	dishevelled segment polarity protein 1		GO:0099054	presynapse assembly (GO:0099054)	BP	352
MGI:1889272	HGNC:5951	CADM1	cell adhesion molecule 1	NECL2,ST17,BL2,SYNCAM,IGSF4A,NECL-2,SYNCAM1,RA175,TSLC1,IGSF4	GO:0099054	presynapse assembly (GO:0099054)	BP	1018
MGI:2443834	HGNC:9246	PPFIA2	PTPRF interacting protein alpha 2		GO:0099054	presynapse assembly (GO:0099054)	BP	1037
MGI:1924037	HGNC:9247	PPFIA3	PTPRF interacting protein alpha 3	KIAA0654,LPNA3,MGC126567,MGC126569	GO:0099054	presynapse assembly (GO:0099054)	BP	1037
MGI:97812	HGNC:9668	PTPRD	protein tyrosine phosphatase receptor type D	PTPD,HPTP	GO:0099054	presynapse assembly (GO:0099054)	BP	1826
MGI:97815	HGNC:9681	PTPRS	protein tyrosine phosphatase receptor type S		GO:0099054	presynapse assembly (GO:0099054)	BP	1843
MGI:1096391	HGNC:8008	NRXN1	neurexin 1	KIAA0578,HS.22998	GO:0099054	presynapse assembly (GO:0099054)	BP	1934
MGI:97815	HGNC:9681	PTPRS	protein tyrosine phosphatase receptor type S		GO:0099054	presynapse assembly (GO:0099054)	BP	2336
MGI:1096391	HGNC:8008	NRXN1	neurexin 1	KIAA0578,HS.22998	GO:0099054	presynapse assembly (GO:0099054)	BP	2748
MGI:96661	HGNC:6222	KCNA4	potassium voltage-gated channel subfamily A member 4	KV1.4,HK1,HPCN2,KCNA4L	GO:0099055	integral component of postsynaptic membrane (GO:0099055)	CC	14
MGI:105368	HGNC:815	ATP2B2	ATPase plasma membrane Ca2+ transporting 2	PMCA2	GO:0099055	integral component of postsynaptic membrane (GO:0099055)	CC	86
MGI:96659	HGNC:6220	KCNA2	potassium voltage-gated channel subfamily A member 2	KV1.2,HK4	GO:0099055	integral component of postsynaptic membrane (GO:0099055)	CC	183
MGI:1351342	HGNC:4597	GRM5	glutamate metabotropic receptor 5	MGLUR5,GPRC1E,MGLU5,PPP1R86	GO:0099055	integral component of postsynaptic membrane (GO:0099055)	CC	217
MGI:1889272	HGNC:5951	CADM1	cell adhesion molecule 1	NECL2,ST17,BL2,SYNCAM,IGSF4A,NECL-2,SYNCAM1,RA175,TSLC1,IGSF4	GO:0099055	integral component of postsynaptic membrane (GO:0099055)	CC	231
MGI:98277	HGNC:3388	EPHA4	EPH receptor A4	HEK8,TYRO1	GO:0099055	integral component of postsynaptic membrane (GO:0099055)	CC	259
MGI:106217	HGNC:1392	CACNA1E	calcium voltage-gated channel subunit alpha1 E	CAV2.3,BII,CACH6,CACNL1A6	GO:0099055	integral component of postsynaptic membrane (GO:0099055)	CC	460
MGI:95627	HGNC:11042	SLC6A1	solute carrier family 6 member 1	GAT1,GABATR,GABATHG	GO:0099055	integral component of postsynaptic membrane (GO:0099055)	CC	767
MGI:94862	HGNC:11049	SLC6A3	solute carrier family 6 member 3	DAT,DAT1	GO:0099055	integral component of postsynaptic membrane (GO:0099055)	CC	835
MGI:107956	HGNC:11068	SLC8A1	solute carrier family 8 member A1	NCX1	GO:0099055	integral component of postsynaptic membrane (GO:0099055)	CC	841
MGI:107996	HGNC:11069	SLC8A2	solute carrier family 8 member A2	NCX2,KIAA1087	GO:0099055	integral component of postsynaptic membrane (GO:0099055)	CC	842
MGI:95809	HGNC:4572	GRIA2	glutamate ionotropic receptor AMPA type subunit 2	GLUA2,GLURB,GLUR2	GO:0099055	integral component of postsynaptic membrane (GO:0099055)	CC	1199
MGI:95810	HGNC:4573	GRIA3	glutamate ionotropic receptor AMPA type subunit 3	GLUA3,GLURC,MRX94,GLUR3	GO:0099055	integral component of postsynaptic membrane (GO:0099055)	CC	1200
MGI:1351338	HGNC:4593	GRM1	glutamate metabotropic receptor 1	GPRC1A,MGLU1,MGLUR1,PPP1R85	GO:0099055	integral component of postsynaptic membrane (GO:0099055)	CC	1472
MGI:2386030	HGNC:4507	GABBR2	gamma-aminobutyric acid type B receptor subunit 2	HG20,GABABR2,GPRC3B,GPR51	GO:0099055	integral component of postsynaptic membrane (GO:0099055)	CC	1679
MGI:96602	HGNC:6139	ITGA3	integrin subunit alpha 3	CD49C,VLA3A,VCA-2,GAP-B3,MSK18	GO:0099055	integral component of postsynaptic membrane (GO:0099055)	CC	3844
MGI:105083	HGNC:10939	SLC1A1	solute carrier family 1 member 1	EAAC1,EAAT3	GO:0099055	integral component of postsynaptic membrane (GO:0099055)	CC	3957
MGI:96661	HGNC:6222	KCNA4	potassium voltage-gated channel subfamily A member 4	KV1.4,HK1,HPCN2,KCNA4L	GO:0099056	integral component of presynaptic membrane (GO:0099056)	CC	13
MGI:96659	HGNC:6220	KCNA2	potassium voltage-gated channel subfamily A member 2	KV1.2,HK4	GO:0099056	integral component of presynaptic membrane (GO:0099056)	CC	182
MGI:2137858	HGNC:17601	CADM3	cell adhesion molecule 3	BIGR,FLJ10698,TSLL1,NECL1,SYNCAM3,NECL-1,IGSF4B	GO:0099056	integral component of presynaptic membrane (GO:0099056)	CC	236
MGI:98277	HGNC:3388	EPHA4	EPH receptor A4	HEK8,TYRO1	GO:0099056	integral component of presynaptic membrane (GO:0099056)	CC	258
MGI:104781	HGNC:6267	KCNJ6	potassium inwardly rectifying channel subfamily J member 6	KIR3.2,GIRK2,KATP2,BIR1,HIGIRK2,KCNJ7	GO:0099056	integral component of presynaptic membrane (GO:0099056)	CC	285
MGI:1889272	HGNC:5951	CADM1	cell adhesion molecule 1	NECL2,ST17,BL2,SYNCAM,IGSF4A,NECL-2,SYNCAM1,RA175,TSLC1,IGSF4	GO:0099056	integral component of presynaptic membrane (GO:0099056)	CC	310
MGI:88296	HGNC:1389	CACNA1B	calcium voltage-gated channel subunit alpha1 B	CAV2.2,CACNN,CACNL1A5	GO:0099056	integral component of presynaptic membrane (GO:0099056)	CC	383
MGI:106217	HGNC:1392	CACNA1E	calcium voltage-gated channel subunit alpha1 E	CAV2.3,BII,CACH6,CACNL1A6	GO:0099056	integral component of presynaptic membrane (GO:0099056)	CC	386
MGI:88107	HGNC:801	ATP1A3	ATPase Na+/K+ transporting subunit alpha 3	DYT12	GO:0099056	integral component of presynaptic membrane (GO:0099056)	CC	389
MGI:2183572	HGNC:18747	CNTNAP4	contactin associated protein family member 4	CASPR4,KIAA1763	GO:0099056	integral component of presynaptic membrane (GO:0099056)	CC	423
MGI:98248	HGNC:10588	SCN2A	sodium voltage-gated channel alpha subunit 2	NAV1.2,HBSCII,HBSCI,SCN2A1,SCN2A2	GO:0099056	integral component of presynaptic membrane (GO:0099056)	CC	531
MGI:95627	HGNC:11042	SLC6A1	solute carrier family 6 member 1	GAT1,GABATR,GABATHG	GO:0099056	integral component of presynaptic membrane (GO:0099056)	CC	764
MGI:2147363	HGNC:11054	SLC6A7	solute carrier family 6 member 7	PROT	GO:0099056	integral component of presynaptic membrane (GO:0099056)	CC	780
MGI:94862	HGNC:11049	SLC6A3	solute carrier family 6 member 3	DAT,DAT1	GO:0099056	integral component of presynaptic membrane (GO:0099056)	CC	836
MGI:97815	HGNC:9681	PTPRS	protein tyrosine phosphatase receptor type S		GO:0099056	integral component of presynaptic membrane (GO:0099056)	CC	844
MGI:1096391	HGNC:8008	NRXN1	neurexin 1	KIAA0578,HS.22998	GO:0099056	integral component of presynaptic membrane (GO:0099056)	CC	894
MGI:1096391	HGNC:8008	NRXN1	neurexin 1	KIAA0578,HS.22998	GO:0099056	integral component of presynaptic membrane (GO:0099056)	CC	900
MGI:88107	HGNC:801	ATP1A3	ATPase Na+/K+ transporting subunit alpha 3	DYT12	GO:0099056	integral component of presynaptic membrane (GO:0099056)	CC	904
MGI:1929461	HGNC:20973	ADGRL1	adhesion G protein-coupled receptor L1	KIAA0821,CIRL1,LEC2,LPHN1	GO:0099056	integral component of presynaptic membrane (GO:0099056)	CC	1012
MGI:109355	HGNC:11433	STX1A	syntaxin 1A	HPC-1,P35-1,STX1	GO:0099056	integral component of presynaptic membrane (GO:0099056)	CC	1163
MGI:95809	HGNC:4572	GRIA2	glutamate ionotropic receptor AMPA type subunit 2	GLUA2,GLURB,GLUR2	GO:0099056	integral component of presynaptic membrane (GO:0099056)	CC	1196
MGI:95810	HGNC:4573	GRIA3	glutamate ionotropic receptor AMPA type subunit 3	GLUA3,GLURC,MRX94,GLUR3	GO:0099056	integral component of presynaptic membrane (GO:0099056)	CC	1197
MGI:95809	HGNC:4572	GRIA2	glutamate ionotropic receptor AMPA type subunit 2	GLUA2,GLURB,GLUR2	GO:0099056	integral component of presynaptic membrane (GO:0099056)	CC	1206
MGI:1859545	HGNC:11514	SYT7	synaptotagmin 7	IPCA-7,SYT-VII,MGC150517,PCANAP7	GO:0099056	integral component of presynaptic membrane (GO:0099056)	CC	1314
MGI:98246	HGNC:10585	SCN1A	sodium voltage-gated channel alpha subunit 1	NAV1.1,GEFSP2,HBSCI,NAC1,SMEI,SCN1,FEB3	GO:0099056	integral component of presynaptic membrane (GO:0099056)	CC	1341
MGI:95819	HGNC:4584	GRIN1	glutamate ionotropic receptor NMDA type subunit 1	GLUN1,NMDAR1	GO:0099056	integral component of presynaptic membrane (GO:0099056)	CC	1348
MGI:87888	HGNC:1958	CHRNA4	cholinergic receptor nicotinic alpha 4 subunit	BFNC,EBN,EBN1	GO:0099056	integral component of presynaptic membrane (GO:0099056)	CC	1420
MGI:87891	HGNC:1962	CHRNB2	cholinergic receptor nicotinic beta 2 subunit		GO:0099056	integral component of presynaptic membrane (GO:0099056)	CC	1422
MGI:87891	HGNC:1962	CHRNB2	cholinergic receptor nicotinic beta 2 subunit		GO:0099056	integral component of presynaptic membrane (GO:0099056)	CC	1427
MGI:87888	HGNC:1958	CHRNA4	cholinergic receptor nicotinic alpha 4 subunit	BFNC,EBN,EBN1	GO:0099056	integral component of presynaptic membrane (GO:0099056)	CC	1430
MGI:95627	HGNC:11042	SLC6A1	solute carrier family 6 member 1	GAT1,GABATR,GABATHG	GO:0099056	integral component of presynaptic membrane (GO:0099056)	CC	1903
MGI:2386030	HGNC:4507	GABBR2	gamma-aminobutyric acid type B receptor subunit 2	HG20,GABABR2,GPRC3B,GPR51	GO:0099056	integral component of presynaptic membrane (GO:0099056)	CC	1914
MGI:1916267	HGNC:30500	PRRT2	proline rich transmembrane protein 2	FLJ25513,DKFZP547J199,IFITMD1,FICCA,DSPB3,PKC,EKD1,ICCA,DYT10	GO:0099056	integral component of presynaptic membrane (GO:0099056)	CC	1953
MGI:87888	HGNC:1958	CHRNA4	cholinergic receptor nicotinic alpha 4 subunit	BFNC,EBN,EBN1	GO:0099056	integral component of presynaptic membrane (GO:0099056)	CC	1985
MGI:97815	HGNC:9681	PTPRS	protein tyrosine phosphatase receptor type S		GO:0099056	integral component of presynaptic membrane (GO:0099056)	CC	2246
MGI:97812	HGNC:9668	PTPRD	protein tyrosine phosphatase receptor type D	PTPD,HPTP	GO:0099056	integral component of presynaptic membrane (GO:0099056)	CC	2248
MGI:1914047	HGNC:13830	CNTNAP2	contactin associated protein 2	CASPR2,KIAA0868,NRXN4	GO:0099056	integral component of presynaptic membrane (GO:0099056)	CC	4189
MGI:97812	HGNC:9668	PTPRD	protein tyrosine phosphatase receptor type D	PTPD,HPTP	GO:0099056	integral component of presynaptic membrane (GO:0099056)	CC	4204
MGI:96721	HGNC:6470	L1CAM	L1 cell adhesion molecule	CD171,HSAS1,SPG1,HSAS,MASA,MIC5,S10	GO:0099056	integral component of presynaptic membrane (GO:0099056)	CC	4523
MGI:108077	HGNC:17867	NPTN	neuroplastin	SDR1,GP55,GP65,NP65,NP55,SDFR1	GO:0099059	integral component of presynaptic active zone membrane (GO:0099059)	CC	25
MGI:105368	HGNC:815	ATP2B2	ATPase plasma membrane Ca2+ transporting 2	PMCA2	GO:0099059	integral component of presynaptic active zone membrane (GO:0099059)	CC	88
MGI:88111	HGNC:817	ATP2B4	ATPase plasma membrane Ca2+ transporting 4	PMCA4,ATP2B2,MXRA1	GO:0099059	integral component of presynaptic active zone membrane (GO:0099059)	CC	90
MGI:109482	HGNC:1388	CACNA1A	calcium voltage-gated channel subunit alpha1 A	CAV2.1,EA2,APCA,HPCA,FHM,CACNL1A4,SCA6,MHP1,MHP	GO:0099059	integral component of presynaptic active zone membrane (GO:0099059)	CC	384
MGI:107671	HGNC:4460	GPM6A	glycoprotein M6A	GPM6	GO:0099059	integral component of presynaptic active zone membrane (GO:0099059)	CC	413
MGI:103169	HGNC:10596	SCN8A	sodium voltage-gated channel alpha subunit 8	NAV1.6,NACH6,PN4,CERIII,CIAT,MED	GO:0099059	integral component of presynaptic active zone membrane (GO:0099059)	CC	546
MGI:95809	HGNC:4572	GRIA2	glutamate ionotropic receptor AMPA type subunit 2	GLUA2,GLURB,GLUR2	GO:0099059	integral component of presynaptic active zone membrane (GO:0099059)	CC	1194
MGI:95819	HGNC:4584	GRIN1	glutamate ionotropic receptor NMDA type subunit 1	GLUN1,NMDAR1	GO:0099059	integral component of presynaptic active zone membrane (GO:0099059)	CC	1385
MGI:99923	HGNC:6284	KCNMA1	potassium calcium-activated channel subfamily M alpha 1	KCA1.1,MSLO1,SLO	GO:0099059	integral component of presynaptic active zone membrane (GO:0099059)	CC	1445
MGI:1926483	HGNC:9706	NECTIN1	nectin cell adhesion molecule 1	PRR,PRR1,PVRR1,SK-12,HIGR,CLPED1,CD111,OFC7,HVEC,ED4,PVRL1	GO:0099059	integral component of presynaptic active zone membrane (GO:0099059)	CC	2232
MGI:1096391	HGNC:8008	NRXN1	neurexin 1	KIAA0578,HS.22998	GO:0099059	integral component of presynaptic active zone membrane (GO:0099059)	CC	2750
MGI:109355	HGNC:11433	STX1A	syntaxin 1A	HPC-1,P35-1,STX1	GO:0099059	integral component of presynaptic active zone membrane (GO:0099059)	CC	3749
MGI:96602	HGNC:6139	ITGA3	integrin subunit alpha 3	CD49C,VLA3A,VCA-2,GAP-B3,MSK18	GO:0099059	integral component of presynaptic active zone membrane (GO:0099059)	CC	3806
MGI:95810	HGNC:4573	GRIA3	glutamate ionotropic receptor AMPA type subunit 3	GLUA3,GLURC,MRX94,GLUR3	GO:0099059	integral component of presynaptic active zone membrane (GO:0099059)	CC	3834
MGI:87891	HGNC:1962	CHRNB2	cholinergic receptor nicotinic beta 2 subunit		GO:0099060	integral component of postsynaptic specialization membrane (GO:0099060)	CC	1990
MGI:87888	HGNC:1958	CHRNA4	cholinergic receptor nicotinic alpha 4 subunit	BFNC,EBN,EBN1	GO:0099060	integral component of postsynaptic specialization membrane (GO:0099060)	CC	1991
MGI:87891	HGNC:1962	CHRNB2	cholinergic receptor nicotinic beta 2 subunit		GO:0099060	integral component of postsynaptic specialization membrane (GO:0099060)	CC	2005
MGI:1928743	HGNC:6239	KCND3	potassium voltage-gated channel subfamily D member 3	KV4.3,KSHIVB,SCA22,SCA19	GO:0099060	integral component of postsynaptic specialization membrane (GO:0099060)	CC	2241
MGI:2179435	HGNC:14291	NLGN1	neuroligin 1	KIAA1070	GO:0099060	integral component of postsynaptic specialization membrane (GO:0099060)	CC	2744
MGI:108077	HGNC:17867	NPTN	neuroplastin	SDR1,GP55,GP65,NP65,NP55,SDFR1	GO:0099061	integral component of postsynaptic density membrane (GO:0099061)	CC	23
MGI:105368	HGNC:815	ATP2B2	ATPase plasma membrane Ca2+ transporting 2	PMCA2	GO:0099061	integral component of postsynaptic density membrane (GO:0099061)	CC	85
MGI:1351338	HGNC:4593	GRM1	glutamate metabotropic receptor 1	GPRC1A,MGLU1,MGLUR1,PPP1R85	GO:0099061	integral component of postsynaptic density membrane (GO:0099061)	CC	213
MGI:99677	HGNC:232	ADCY1	adenylate cyclase 1	AC1,DFNB44	GO:0099061	integral component of postsynaptic density membrane (GO:0099061)	CC	321
MGI:1340046	HGNC:201	ADAM22	ADAM metallopeptidase domain 22	MDC2	GO:0099061	integral component of postsynaptic density membrane (GO:0099061)	CC	395
MGI:103169	HGNC:10596	SCN8A	sodium voltage-gated channel alpha subunit 8	NAV1.6,NACH6,PN4,CERIII,CIAT,MED	GO:0099061	integral component of postsynaptic density membrane (GO:0099061)	CC	547
MGI:106530	HGNC:23496	PLPPR4	phospholipid phosphatase related 4	PRG-1,LPPR4,KIAA0455,PHP1	GO:0099061	integral component of postsynaptic density membrane (GO:0099061)	CC	1412
MGI:95809	HGNC:4572	GRIA2	glutamate ionotropic receptor AMPA type subunit 2	GLUA2,GLURB,GLUR2	GO:0099061	integral component of postsynaptic density membrane (GO:0099061)	CC	1459
MGI:95819	HGNC:4584	GRIN1	glutamate ionotropic receptor NMDA type subunit 1	GLUN1,NMDAR1	GO:0099061	integral component of postsynaptic density membrane (GO:0099061)	CC	1461
MGI:94869	HGNC:2701	DCC	DCC netrin 1 receptor	IGDCC1,NTN1R1	GO:0099061	integral component of postsynaptic density membrane (GO:0099061)	CC	1469
MGI:1340046	HGNC:201	ADAM22	ADAM metallopeptidase domain 22	MDC2	GO:0099061	integral component of postsynaptic density membrane (GO:0099061)	CC	1840
MGI:1915835	HGNC:14085	RTN4	reticulon 4	NSP-CL,KIAA0886,NOGO,ASY	GO:0099061	integral component of postsynaptic density membrane (GO:0099061)	CC	1902
MGI:1930171	HGNC:17664	NECTIN3	nectin cell adhesion molecule 3	NECTIN-3,PPR3,PVRR3,DKFZP566B0846,CDW113,CD113,PVRL3	GO:0099061	integral component of postsynaptic density membrane (GO:0099061)	CC	2323
MGI:95819	HGNC:4584	GRIN1	glutamate ionotropic receptor NMDA type subunit 1	GLUN1,NMDAR1	GO:0099061	integral component of postsynaptic density membrane (GO:0099061)	CC	2377
MGI:95809	HGNC:4572	GRIA2	glutamate ionotropic receptor AMPA type subunit 2	GLUA2,GLURB,GLUR2	GO:0099061	integral component of postsynaptic density membrane (GO:0099061)	CC	2481
MGI:95810	HGNC:4573	GRIA3	glutamate ionotropic receptor AMPA type subunit 3	GLUA3,GLURC,MRX94,GLUR3	GO:0099061	integral component of postsynaptic density membrane (GO:0099061)	CC	2484
MGI:106919	HGNC:12669	VDAC1	voltage dependent anion channel 1	MGC111064,PORIN	GO:0099061	integral component of postsynaptic density membrane (GO:0099061)	CC	2984
MGI:109239	HGNC:6229	KCNAB2	potassium voltage-gated channel subfamily A regulatory beta subunit 2	AKR6A5,KCNA2B,HKVBETA2.1,HKVBETA2.2	GO:0099061	integral component of postsynaptic density membrane (GO:0099061)	CC	3037
MGI:109355	HGNC:11433	STX1A	syntaxin 1A	HPC-1,P35-1,STX1	GO:0099061	integral component of postsynaptic density membrane (GO:0099061)	CC	3750
MGI:106677	HGNC:10935	SLC18A2	solute carrier family 18 member A2	SVMT,SVAT,VMAT2	GO:0099066	integral component of neuronal dense core vesicle membrane (GO:0099066)	CC	1492
MGI:103309	HGNC:3758	FLOT2	flotillin 2	ESA,ESA1,ECS-1,ECS1,M17S1	GO:0099072	regulation of postsynaptic membrane neurotransmitter receptor levels (GO:0099072)	BP	397
MGI:1096389	HGNC:8010	NRXN3	neurexin 3	KIAA0743,C14ORF60	GO:0099072	regulation of postsynaptic membrane neurotransmitter receptor levels (GO:0099072)	BP	896
MGI:104684	HGNC:3420	EPS8	epidermal growth factor receptor pathway substrate 8		GO:0099072	regulation of postsynaptic membrane neurotransmitter receptor levels (GO:0099072)	BP	930
MGI:894689	HGNC:12851	YWHAE	tyrosine 3-monooxygenase/tryptophan 5-monooxygenase activation protein epsilon	FLJ45465	GO:0099072	regulation of postsynaptic membrane neurotransmitter receptor levels (GO:0099072)	BP	2552
MGI:1195966	HGNC:2516	CTNND2	catenin delta 2	NPRAP,GT24	GO:0099072	regulation of postsynaptic membrane neurotransmitter receptor levels (GO:0099072)	BP	2968
MGI:1923573	HGNC:18472	ZDHHC5	zinc finger DHHC-type palmitoyltransferase 5	KIAA1748,ZNF375,DHHC5	GO:0099072	regulation of postsynaptic membrane neurotransmitter receptor levels (GO:0099072)	BP	2974
MGI:1096389	HGNC:8010	NRXN3	neurexin 3	KIAA0743,C14ORF60	GO:0099072	regulation of postsynaptic membrane neurotransmitter receptor levels (GO:0099072)	BP	3668
MGI:2183446	HGNC:16923	AGAP3	ArfGAP with GTPase domain, ankyrin repeat and PH domain 3	CENTG3	GO:0099072	regulation of postsynaptic membrane neurotransmitter receptor levels (GO:0099072)	BP	3836
MGI:97855	HGNC:9861	RAP2A	RAP2A, member of RAS oncogene family	K-REV,RAP2	GO:0099072	regulation of postsynaptic membrane neurotransmitter receptor levels (GO:0099072)	BP	3975
MGI:108466	HGNC:9841	RALBP1	ralA binding protein 1	RLIP76,RIP1,RIP	GO:0099072	regulation of postsynaptic membrane neurotransmitter receptor levels (GO:0099072)	BP	4087
MGI:1923992	HGNC:20073	SNX27	sorting nexin 27	MY014,KIAA0488,MGC20471	GO:0099072	regulation of postsynaptic membrane neurotransmitter receptor levels (GO:0099072)	BP	4090
MGI:1919433	HGNC:14970	SNX6	sorting nexin 6		GO:0099072	regulation of postsynaptic membrane neurotransmitter receptor levels (GO:0099072)	BP	4091
MGI:1923992	HGNC:20073	SNX27	sorting nexin 27	MY014,KIAA0488,MGC20471	GO:0099072	regulation of postsynaptic membrane neurotransmitter receptor levels (GO:0099072)	BP	4114
MGI:96250	HGNC:5253	HSP90AA1	heat shock protein 90 alpha family class A member 1	HSP89,HSP90,FLJ31884,HSP90N,HSPC1,HSPCA	GO:0099072	regulation of postsynaptic membrane neurotransmitter receptor levels (GO:0099072)	BP	4131
MGI:1914047	HGNC:13830	CNTNAP2	contactin associated protein 2	CASPR2,KIAA0868,NRXN4	GO:0099072	regulation of postsynaptic membrane neurotransmitter receptor levels (GO:0099072)	BP	4191
MGI:1923573	HGNC:18472	ZDHHC5	zinc finger DHHC-type palmitoyltransferase 5	KIAA1748,ZNF375,DHHC5	GO:0099091	postsynaptic specialization, intracellular component (GO:0099091)	CC	2854
MGI:88275	HGNC:2510	CTNNA2	catenin alpha 2	CAP-R,CT114	GO:0099092	postsynaptic density, intracellular component (GO:0099092)	CC	992
MGI:1196356	HGNC:29112	IQSEC1	IQ motif and Sec7 domain ArfGEF 1	KIAA0763,GEP100,BRAG2,ARF-GEP100	GO:0099092	postsynaptic density, intracellular component (GO:0099092)	CC	1058
MGI:1924781	HGNC:24600	ANKS1B	ankyrin repeat and sterile alpha motif domain containing 1B	EB-1,AIDA-1,CAJALIN-2,ANKS2	GO:0099092	postsynaptic density, intracellular component (GO:0099092)	CC	1295
MGI:95602	HGNC:4037	FYN	FYN proto-oncogene, Src family tyrosine kinase	SYN,SLK,MGC45350	GO:0099092	postsynaptic density, intracellular component (GO:0099092)	CC	1739
MGI:107231	HGNC:2900	DLG1	discs large MAGUK scaffold protein 1	SAP97,SAP-97,HDLG,DLGH1,DJ1061C18.1.1	GO:0099092	postsynaptic density, intracellular component (GO:0099092)	CC	2049
MGI:107771	HGNC:81	ABR	ABR activator of RhoGEF and GTPase	MDB	GO:0099092	postsynaptic density, intracellular component (GO:0099092)	CC	2191
MGI:88141	HGNC:1014	BCR	BCR activator of RhoGEF and GTPase	D22S662,CML,PHL,ALL,D22S11,BCR1	GO:0099092	postsynaptic density, intracellular component (GO:0099092)	CC	2192
MGI:2444121	HGNC:30212	TANC2	tetratricopeptide repeat, ankyrin repeat and coiled-coil containing 2	DKFZP564D166,FLJ10215,FLJ11824,KIAA1148,KIAA1636,ROLS,ROLSA	GO:0099092	postsynaptic density, intracellular component (GO:0099092)	CC	2250
MGI:1928395	HGNC:11172	SNX1	sorting nexin 1	SNX1A,MGC8664,HST17379,VPS5	GO:0099092	postsynaptic density, intracellular component (GO:0099092)	CC	2334
MGI:95640	HGNC:4141	GAPDH	glyceraldehyde-3-phosphate dehydrogenase	GAPD	GO:0099092	postsynaptic density, intracellular component (GO:0099092)	CC	2347
MGI:109547	HGNC:2974	DNM2	dynamin 2	DYNII,DYN2,CMTDIB,CMTDI1,DI-CMTB,CMT2M	GO:0099092	postsynaptic density, intracellular component (GO:0099092)	CC	2880
MGI:700010	HGNC:10830	SH3GL1	SH3 domain containing GRB2 like 1, endophilin A2	SH3P8,SH3D2B,CNSA1,EEN,MGC111371	GO:0099092	postsynaptic density, intracellular component (GO:0099092)	CC	2896
MGI:1096376	HGNC:30389	EXOC4	exocyst complex component 4	KIAA1699,MGC27170,SEC8,SEC8P,SEC8L1	GO:0099092	postsynaptic density, intracellular component (GO:0099092)	CC	3945
MGI:106913	HGNC:24011	ABI2	abl interactor 2	ABI-2,AIP-1,ABI2B,ABLBP3,ARGBPIA,SSH3BP2	GO:0099140	presynaptic actin cytoskeleton organization (GO:0099140)	BP	1454
MGI:1914502	HGNC:20039	CAP2	cyclase associated actin cytoskeleton regulatory protein 2		GO:0099140	presynaptic actin cytoskeleton organization (GO:0099140)	BP	4006
MGI:87906	HGNC:144	ACTG1	actin gamma 1	ACTG,DFNA20,DFNA26	GO:0099143	presynaptic actin cytoskeleton (GO:0099143)	CC	419
MGI:104727	HGNC:2309	CPLX1	complexin 1	CPX-I	GO:0099145	regulation of exocytic insertion of neurotransmitter receptor to postsynaptic membrane (GO:0099145)	BP	578
MGI:2661175	HGNC:19701	CNKSR2	connector enhancer of kinase suppressor of Ras 2	KIAA0902,CNK2,KSR2	GO:0099147	extrinsic component of postsynaptic density membrane (GO:0099147)	CC	2365
MGI:2661175	HGNC:19701	CNKSR2	connector enhancer of kinase suppressor of Ras 2	KIAA0902,CNK2,KSR2	GO:0099147	extrinsic component of postsynaptic density membrane (GO:0099147)	CC	3118
MGI:88256	HGNC:1460	CAMK2A	calcium/calmodulin dependent protein kinase II alpha	KIAA0968,CAMKIINALPHA,CAMKIIΑ,CAMKA	GO:0099148	regulation of synaptic vesicle docking (GO:0099148)	BP	981
MGI:1195461	HGNC:9164	SEPTIN5	septin 5	HCDCREL-1,H5,PNUTL1,SEPT5	GO:0099148	regulation of synaptic vesicle docking (GO:0099148)	BP	1656
MGI:107172	HGNC:9317	PPP3R1	protein phosphatase 3 regulatory subunit B, alpha	CALNB1,CNB,CNB1	GO:0099149	regulation of postsynaptic neurotransmitter receptor endocytosis (GO:0099149)	BP	255
MGI:1196356	HGNC:29112	IQSEC1	IQ motif and Sec7 domain ArfGEF 1	KIAA0763,GEP100,BRAG2,ARF-GEP100	GO:0099149	regulation of postsynaptic neurotransmitter receptor endocytosis (GO:0099149)	BP	1060
MGI:97297	HGNC:7727	NEDD4	NEDD4 E3 ubiquitin protein ligase	KIAA0093,MGC176705,NEDD4-1,RPF1	GO:0099149	regulation of postsynaptic neurotransmitter receptor endocytosis (GO:0099149)	BP	1340
MGI:1345181	HGNC:8570	PACSIN1	protein kinase C and casein kinase substrate in neurons 1	SDPI	GO:0099149	regulation of postsynaptic neurotransmitter receptor endocytosis (GO:0099149)	BP	2660
MGI:1298224	HGNC:8996	PIP5K1C	phosphatidylinositol-4-phosphate 5-kinase type 1 gamma	PIP5KGAMMA,KIAA0589,LCCS3	GO:0099149	regulation of postsynaptic neurotransmitter receptor endocytosis (GO:0099149)	BP	2905
MGI:1345181	HGNC:8570	PACSIN1	protein kinase C and casein kinase substrate in neurons 1	SDPI	GO:0099149	regulation of postsynaptic neurotransmitter receptor endocytosis (GO:0099149)	BP	2907
MGI:1354961	HGNC:11503	SYNJ1	synaptojanin 1	INPP5G,PARK20	GO:0099149	regulation of postsynaptic neurotransmitter receptor endocytosis (GO:0099149)	BP	2910
MGI:894645	HGNC:9394	PICK1	protein interacting with PRKCA 1	DJ1039K5,MGC15204,PRKCABP	GO:0099149	regulation of postsynaptic neurotransmitter receptor endocytosis (GO:0099149)	BP	2917
MGI:1916977	HGNC:20075	USP46	ubiquitin specific peptidase 46	FLJ12552	GO:0099149	regulation of postsynaptic neurotransmitter receptor endocytosis (GO:0099149)	BP	2923
MGI:107423	HGNC:8060	NUMB	NUMB endocytic adaptor protein	C14ORF41	GO:0099149	regulation of postsynaptic neurotransmitter receptor endocytosis (GO:0099149)	BP	2927
MGI:1927243	HGNC:9839	RALA	RAS like proto-oncogene A	RAL	GO:0099149	regulation of postsynaptic neurotransmitter receptor endocytosis (GO:0099149)	BP	3990
MGI:1298407	HGNC:11854	TSPAN7	tetraspanin 7	DXS1692E,TALLA-1,A15,CD231,MXS1,TM4SF2,MRX58	GO:0099149	regulation of postsynaptic neurotransmitter receptor endocytosis (GO:0099149)	BP	4002
MGI:2157980	HGNC:25507	VAC14	VAC14 component of PIKFYVE complex	FLJ10305,ARPIKFYVE,TAX1BP2	GO:0099149	regulation of postsynaptic neurotransmitter receptor endocytosis (GO:0099149)	BP	4106
MGI:2442233	HGNC:14561	ARHGEF9	Cdc42 guanine nucleotide exchange factor 9	KIAA0424,PEM-2	GO:0099150	regulation of postsynaptic specialization assembly (GO:0099150)	BP	156
MGI:95639	HGNC:4140	GAP43	growth associated protein 43	B-50,PP46,GAP-43	GO:0099150	regulation of postsynaptic specialization assembly (GO:0099150)	BP	1720
MGI:1096391	HGNC:8008	NRXN1	neurexin 1	KIAA0578,HS.22998	GO:0099150	regulation of postsynaptic specialization assembly (GO:0099150)	BP	2757
MGI:97812	HGNC:9668	PTPRD	protein tyrosine phosphatase receptor type D	PTPD,HPTP	GO:0099151	regulation of postsynaptic density assembly (GO:0099151)	BP	1829
MGI:2443679	HGNC:20284	SIPA1L1	signal induced proliferation associated 1 like 1	KIAA0440,E6TP1,SPAR1	GO:0099151	regulation of postsynaptic density assembly (GO:0099151)	BP	1841
MGI:97815	HGNC:9681	PTPRS	protein tyrosine phosphatase receptor type S		GO:0099151	regulation of postsynaptic density assembly (GO:0099151)	BP	1846
MGI:1096391	HGNC:8008	NRXN1	neurexin 1	KIAA0578,HS.22998	GO:0099151	regulation of postsynaptic density assembly (GO:0099151)	BP	1935
MGI:97815	HGNC:9681	PTPRS	protein tyrosine phosphatase receptor type S		GO:0099151	regulation of postsynaptic density assembly (GO:0099151)	BP	2338
MGI:97812	HGNC:9668	PTPRD	protein tyrosine phosphatase receptor type D	PTPD,HPTP	GO:0099151	regulation of postsynaptic density assembly (GO:0099151)	BP	2356
MGI:1859616	HGNC:18706	GRIPAP1	GRIP1 associated protein 1	GRASP-1,GRASP1,KIAA1167,MPMGP800B12492Q3,DKFZP434P0630	GO:0099152	regulation of neurotransmitter receptor transport, endosome to postsynaptic membrane (GO:0099152)	BP	1190
MGI:1859616	HGNC:18706	GRIPAP1	GRIP1 associated protein 1	GRASP-1,GRASP1,KIAA1167,MPMGP800B12492Q3,DKFZP434P0630	GO:0099158	regulation of recycling endosome localization within postsynapse (GO:0099158)	BP	1189
MGI:106211	HGNC:1736	CDC42	cell division cycle 42	G25K,CDC42HS	GO:0099159	regulation of modification of postsynaptic structure (GO:0099159)	BP	1064
MGI:1861437	HGNC:4617	GSK3B	glycogen synthase kinase 3 beta		GO:0099159	regulation of modification of postsynaptic structure (GO:0099159)	BP	1789
MGI:97306	HGNC:7765	NF1	neurofibromin 1		GO:0099159	regulation of modification of postsynaptic structure (GO:0099159)	BP	3082
MGI:1096342	HGNC:667	RHOA	ras homolog family member A	RHO12,RHOH12,ARH12,ARHA	GO:0099159	regulation of modification of postsynaptic structure (GO:0099159)	BP	3704
MGI:107949	HGNC:668	RHOB	ras homolog family member B	RHOH6,MST081,ARH6,ARHB	GO:0099159	regulation of modification of postsynaptic structure (GO:0099159)	BP	3995
MGI:97843	HGNC:9777	RAB3A	RAB3A, member RAS oncogene family		GO:0099161	regulation of presynaptic dense core vesicle exocytosis (GO:0099161)	BP	4027
MGI:2144837	HGNC:14406	PTPN23	protein tyrosine phosphatase non-receptor type 23	DKFZP564F0923,KIAA1471,HD-PTP	GO:0099161	regulation of presynaptic dense core vesicle exocytosis (GO:0099161)	BP	4063
MGI:97599	HGNC:9401	PRKCE	protein kinase C epsilon		GO:0099161	regulation of presynaptic dense core vesicle exocytosis (GO:0099161)	BP	4066
MGI:3606480	HGNC:22980	SLC10A4	solute carrier family 10 member 4	MGC29802	GO:0099162	regulation of synaptic vesicle neurotransmitter loading (GO:0099162)	BP	361
MGI:95640	HGNC:4141	GAPDH	glyceraldehyde-3-phosphate dehydrogenase	GAPD	GO:0099162	regulation of synaptic vesicle neurotransmitter loading (GO:0099162)	BP	2398
MGI:1099446	HGNC:30672	SYNPO	synaptopodin	KIAA1029	GO:0099170	postsynaptic modulation of chemical synaptic transmission (GO:0099170)	BP	266
MGI:97613	HGNC:15917	PLCB1	phospholipase C beta 1	KIAA0581,PLC-I,PLC154	GO:0099170	postsynaptic modulation of chemical synaptic transmission (GO:0099170)	BP	941
MGI:107172	HGNC:9317	PPP3R1	protein phosphatase 3 regulatory subunit B, alpha	CALNB1,CNB,CNB1	GO:0099170	postsynaptic modulation of chemical synaptic transmission (GO:0099170)	BP	972
MGI:107172	HGNC:9317	PPP3R1	protein phosphatase 3 regulatory subunit B, alpha	CALNB1,CNB,CNB1	GO:0099170	postsynaptic modulation of chemical synaptic transmission (GO:0099170)	BP	1329
MGI:107164	HGNC:9314	PPP3CA	protein phosphatase 3 catalytic subunit alpha	CNA1,PPP2B,CALN,CALNA	GO:0099170	postsynaptic modulation of chemical synaptic transmission (GO:0099170)	BP	1346
MGI:94869	HGNC:2701	DCC	DCC netrin 1 receptor	IGDCC1,NTN1R1	GO:0099170	postsynaptic modulation of chemical synaptic transmission (GO:0099170)	BP	1470
MGI:97592	HGNC:9380	PRKACA	protein kinase cAMP-activated catalytic subunit alpha	PKACA	GO:0099170	postsynaptic modulation of chemical synaptic transmission (GO:0099170)	BP	3030
MGI:88258	HGNC:1464	CAMK4	calcium/calmodulin dependent protein kinase IV	CAMK-GR,CAMKIV	GO:0099170	postsynaptic modulation of chemical synaptic transmission (GO:0099170)	BP	3669
MGI:1196356	HGNC:29112	IQSEC1	IQ motif and Sec7 domain ArfGEF 1	KIAA0763,GEP100,BRAG2,ARF-GEP100	GO:0099170	postsynaptic modulation of chemical synaptic transmission (GO:0099170)	BP	3725
MGI:1099446	HGNC:30672	SYNPO	synaptopodin	KIAA1029	GO:0099170	postsynaptic modulation of chemical synaptic transmission (GO:0099170)	BP	3726
MGI:105083	HGNC:10939	SLC1A1	solute carrier family 1 member 1	EAAC1,EAAT3	GO:0099170	postsynaptic modulation of chemical synaptic transmission (GO:0099170)	BP	3959
MGI:97599	HGNC:9401	PRKCE	protein kinase C epsilon		GO:0099171	presynaptic modulation of chemical synaptic transmission (GO:0099171)	BP	100
MGI:99677	HGNC:232	ADCY1	adenylate cyclase 1	AC1,DFNB44	GO:0099171	presynaptic modulation of chemical synaptic transmission (GO:0099171)	BP	324
MGI:97550	HGNC:8882	PFN2	profilin 2		GO:0099171	presynaptic modulation of chemical synaptic transmission (GO:0099171)	BP	801
MGI:1860297	HGNC:578	APBA1	amyloid beta precursor protein binding family A member 1	D9S411E,X11,MINT1	GO:0099171	presynaptic modulation of chemical synaptic transmission (GO:0099171)	BP	870
MGI:1261791	HGNC:579	APBA2	amyloid beta precursor protein binding family A member 2	D15S1518E,LIN-10,MGC:14091,HST16821,X11L,MINT2	GO:0099171	presynaptic modulation of chemical synaptic transmission (GO:0099171)	BP	871
MGI:1860297	HGNC:578	APBA1	amyloid beta precursor protein binding family A member 1	D9S411E,X11,MINT1	GO:0099171	presynaptic modulation of chemical synaptic transmission (GO:0099171)	BP	872
MGI:1096389	HGNC:8010	NRXN3	neurexin 3	KIAA0743,C14ORF60	GO:0099171	presynaptic modulation of chemical synaptic transmission (GO:0099171)	BP	897
MGI:1926252	HGNC:1226	GIPC1	GIPC PDZ domain containing family member 1	TIP-2,HS.6454,GIPC,SEMCAP,GLUT1CBP,SYNECTIN,NIP,C19ORF3,RGS19IP1	GO:0099171	presynaptic modulation of chemical synaptic transmission (GO:0099171)	BP	1683
MGI:1096389	HGNC:8010	NRXN3	neurexin 3	KIAA0743,C14ORF60	GO:0099171	presynaptic modulation of chemical synaptic transmission (GO:0099171)	BP	1770
MGI:1861437	HGNC:4617	GSK3B	glycogen synthase kinase 3 beta		GO:0099171	presynaptic modulation of chemical synaptic transmission (GO:0099171)	BP	1798
MGI:87891	HGNC:1962	CHRNB2	cholinergic receptor nicotinic beta 2 subunit		GO:0099171	presynaptic modulation of chemical synaptic transmission (GO:0099171)	BP	2019
MGI:87891	HGNC:1962	CHRNB2	cholinergic receptor nicotinic beta 2 subunit		GO:0099171	presynaptic modulation of chemical synaptic transmission (GO:0099171)	BP	2020
MGI:87888	HGNC:1958	CHRNA4	cholinergic receptor nicotinic alpha 4 subunit	BFNC,EBN,EBN1	GO:0099171	presynaptic modulation of chemical synaptic transmission (GO:0099171)	BP	2021
MGI:109194	HGNC:12853	YWHAH	tyrosine 3-monooxygenase/tryptophan 5-monooxygenase activation protein eta	YWHA1	GO:0099171	presynaptic modulation of chemical synaptic transmission (GO:0099171)	BP	2564
MGI:1351339	HGNC:4594	GRM2	glutamate metabotropic receptor 2	GPRC1B,MGLU2,MGLUR2	GO:0099171	presynaptic modulation of chemical synaptic transmission (GO:0099171)	BP	4014
MGI:1335094	HGNC:1717	SEPTIN7	septin 7	CDC3,SEPT7A,CDC10,SEPT7	GO:0099173	postsynapse organization (GO:0099173)	BP	1621
MGI:2661175	HGNC:19701	CNKSR2	connector enhancer of kinase suppressor of Ras 2	KIAA0902,CNK2,KSR2	GO:0099173	postsynapse organization (GO:0099173)	BP	2788
MGI:94941	HGNC:3084	DVL1	dishevelled segment polarity protein 1		GO:0099173	postsynapse organization (GO:0099173)	BP	2814
MGI:1922250	HGNC:17848	STK38L	serine/threonine kinase 38 like	KIAA0965,NDR2	GO:0099173	postsynapse organization (GO:0099173)	BP	2926
MGI:1352504	HGNC:18415	HIP1R	huntingtin interacting protein 1 related	KIAA0655,HIP3,HIP12,FLJ14000,ILWEQ	GO:0099173	postsynapse organization (GO:0099173)	BP	3034
MGI:106913	HGNC:24011	ABI2	abl interactor 2	ABI-2,AIP-1,ABI2B,ABLBP3,ARGBPIA,SSH3BP2	GO:0099173	postsynapse organization (GO:0099173)	BP	3713
MGI:96602	HGNC:6139	ITGA3	integrin subunit alpha 3	CD49C,VLA3A,VCA-2,GAP-B3,MSK18	GO:0099173	postsynapse organization (GO:0099173)	BP	3863
MGI:2179435	HGNC:14291	NLGN1	neuroligin 1	KIAA1070	GO:0099174	regulation of presynapse organization (GO:0099174)	BP	2756
MGI:97912	HGNC:10011	RHEB	Ras homolog, mTORC1 binding	RHEB2	GO:0099175	regulation of postsynapse organization (GO:0099175)	BP	1896
MGI:99894	HGNC:5044	HNRNPK	heterogeneous nuclear ribonucleoprotein K	CSBP,TUNP,HNRPK	GO:0099175	regulation of postsynapse organization (GO:0099175)	BP	1918
MGI:2671987	HGNC:14295	SHANK2	SH3 and multiple ankyrin repeat domains 2	CTTNBP1,PROSAP1,SHANK,SPANK-3,CORTBP1	GO:0099175	regulation of postsynapse organization (GO:0099175)	BP	1962
MGI:102548	HGNC:12363	TSC2	TSC complex subunit 2	TUBERIN,LAM,PPP1R160,TSC4	GO:0099175	regulation of postsynapse organization (GO:0099175)	BP	2415
MGI:99433	HGNC:655	ARF4	ADP ribosylation factor 4	ARF2	GO:0099175	regulation of postsynapse organization (GO:0099175)	BP	2711
MGI:1342335	HGNC:2720	ASAP1	ArfGAP with SH3 domain, ankyrin repeat and PH domain 1	PAP,KIAA1249,ZG14P,CENTB4,DDEF1	GO:0099175	regulation of postsynapse organization (GO:0099175)	BP	2712
MGI:1917723	HGNC:16626	RAPGEF4	Rap guanine nucleotide exchange factor 4	CAMP-GEFII,CGEF2	GO:0099175	regulation of postsynapse organization (GO:0099175)	BP	2851
MGI:105384	HGNC:5241	HSPA8	heat shock protein family A (Hsp70) member 8	HSC71,HSC70,HSP73,HSPA10	GO:0099175	regulation of postsynapse organization (GO:0099175)	BP	2867
MGI:1915919	HGNC:16835	TAOK2	TAO kinase 2	TAO1,KIAA0881,PSK,PSK1,TAO2,MAP3K17	GO:0099175	regulation of postsynapse organization (GO:0099175)	BP	2980
MGI:94941	HGNC:3084	DVL1	dishevelled segment polarity protein 1		GO:0099175	regulation of postsynapse organization (GO:0099175)	BP	2989
MGI:106211	HGNC:1736	CDC42	cell division cycle 42	G25K,CDC42HS	GO:0099175	regulation of postsynapse organization (GO:0099175)	BP	3001
MGI:1339656	HGNC:8592	PAK3	p21 (RAC1) activated kinase 3	HPAK3,BPAK,MRX30,MRX47	GO:0099175	regulation of postsynapse organization (GO:0099175)	BP	3003
MGI:99638	HGNC:3332	MARK2	microtubule affinity regulating kinase 2	PAR-1,PAR1B,PAR-1B,EMK1	GO:0099175	regulation of postsynapse organization (GO:0099175)	BP	3079
MGI:97306	HGNC:7765	NF1	neurofibromin 1		GO:0099175	regulation of postsynapse organization (GO:0099175)	BP	3081
MGI:1338069	HGNC:6183	ITSN1	intersectin 1	SH3P17,MGC134948,MGC134949,SH3D1A,ITSN	GO:0099175	regulation of postsynapse organization (GO:0099175)	BP	3676
MGI:109520	HGNC:8574	PAFAH1B1	platelet activating factor acetylhydrolase 1b regulatory subunit 1	LIS1,PAFAH,NUDF,MDCR,MDS	GO:0099175	regulation of postsynapse organization (GO:0099175)	BP	3809
MGI:97912	HGNC:10011	RHEB	Ras homolog, mTORC1 binding	RHEB2	GO:0099175	regulation of postsynapse organization (GO:0099175)	BP	3912
MGI:102548	HGNC:12363	TSC2	TSC complex subunit 2	TUBERIN,LAM,PPP1R160,TSC4	GO:0099175	regulation of postsynapse organization (GO:0099175)	BP	3928
MGI:97613	HGNC:15917	PLCB1	phospholipase C beta 1	KIAA0581,PLC-I,PLC154	GO:0099178	regulation of retrograde trans-synaptic signaling by endocanabinoid (GO:0099178)	BP	940
MGI:1354953	HGNC:18957	MAGI2	membrane associated guanylate kinase, WW and PDZ domain containing 2	AIP1,ARIP1,KIAA0705,ACVRIP1,MAGI-2	GO:0099179	regulation of synaptic membrane adhesion (GO:0099179)	BP	1922
MGI:1915919	HGNC:16835	TAOK2	TAO kinase 2	TAO1,KIAA0881,PSK,PSK1,TAO2,MAP3K17	GO:0099179	regulation of synaptic membrane adhesion (GO:0099179)	BP	2369
MGI:2443834	HGNC:9246	PPFIA2	PTPRF interacting protein alpha 2		GO:0099181	structural constituent of presynapse (GO:0099181)	BP	936
MGI:2137706	HGNC:163	ACTN1	actinin alpha 1		GO:0099186	structural constituent of postsynapse (GO:0099186)	BP	2870
MGI:1341299	HGNC:29125	DNM3	dynamin 3	KIAA0820	GO:0099186	structural constituent of postsynapse (GO:0099186)	BP	2881
MGI:1335094	HGNC:1717	SEPTIN7	septin 7	CDC3,SEPT7A,CDC10,SEPT7	GO:0099186	structural constituent of postsynapse (GO:0099186)	BP	2979
MGI:1859545	HGNC:11514	SYT7	synaptotagmin 7	IPCA-7,SYT-VII,MGC150517,PCANAP7	GO:0099502	calcium-dependent activation of synaptic vesicle fusion (GO:0099502)	BP	1608
MGI:99667	HGNC:11509	SYT1	synaptotagmin 1	P65,SYT,SVP65	GO:0099502	calcium-dependent activation of synaptic vesicle fusion (GO:0099502)	BP	1610
MGI:104560	HGNC:8016	NSF	N-ethylmaleimide sensitive factor, vesicle fusing ATPase	SKD2,SEC18	GO:0099504	synaptic vesicle cycle (GO:0099504)	BP	273
MGI:98460	HGNC:11494	SYN1	synapsin I	MRX50	GO:0099504	synaptic vesicle cycle (GO:0099504)	BP	1466
MGI:2443235	HGNC:30339	RIMBP2	RIMS binding protein 2	KIAA0318,RBP2,MGC15831,RIM-BP2,PPP1R133	GO:0099505	regulation of presynaptic membrane potential (GO:0099505)	BP	4141
MGI:95809	HGNC:4572	GRIA2	glutamate ionotropic receptor AMPA type subunit 2	GLUA2,GLURB,GLUR2	GO:0099507	ligand-gated ion channel activity involved in regulation of presynaptic membrane potential (GO:0099507)	BP	1212
MGI:95810	HGNC:4573	GRIA3	glutamate ionotropic receptor AMPA type subunit 3	GLUA3,GLURC,MRX94,GLUR3	GO:0099507	ligand-gated ion channel activity involved in regulation of presynaptic membrane potential (GO:0099507)	BP	1224
MGI:95819	HGNC:4584	GRIN1	glutamate ionotropic receptor NMDA type subunit 1	GLUN1,NMDAR1	GO:0099507	ligand-gated ion channel activity involved in regulation of presynaptic membrane potential (GO:0099507)	BP	1353
MGI:99923	HGNC:6284	KCNMA1	potassium calcium-activated channel subfamily M alpha 1	KCA1.1,MSLO1,SLO	GO:0099507	ligand-gated ion channel activity involved in regulation of presynaptic membrane potential (GO:0099507)	BP	1446
MGI:96661	HGNC:6222	KCNA4	potassium voltage-gated channel subfamily A member 4	KV1.4,HK1,HPCN2,KCNA4L	GO:0099508	voltage-gated ion channel activity involved in regulation of presynaptic membrane potential (GO:0099508)	BP	18
MGI:96659	HGNC:6220	KCNA2	potassium voltage-gated channel subfamily A member 2	KV1.2,HK4	GO:0099508	voltage-gated ion channel activity involved in regulation of presynaptic membrane potential (GO:0099508)	BP	191
MGI:104781	HGNC:6267	KCNJ6	potassium inwardly rectifying channel subfamily J member 6	KIR3.2,GIRK2,KATP2,BIR1,HIGIRK2,KCNJ7	GO:0099508	voltage-gated ion channel activity involved in regulation of presynaptic membrane potential (GO:0099508)	BP	288
MGI:98248	HGNC:10588	SCN2A	sodium voltage-gated channel alpha subunit 2	NAV1.2,HBSCII,HBSCI,SCN2A1,SCN2A2	GO:0099508	voltage-gated ion channel activity involved in regulation of presynaptic membrane potential (GO:0099508)	BP	533
MGI:98246	HGNC:10585	SCN1A	sodium voltage-gated channel alpha subunit 1	NAV1.1,GEFSP2,HBSCI,NAC1,SMEI,SCN1,FEB3	GO:0099508	voltage-gated ion channel activity involved in regulation of presynaptic membrane potential (GO:0099508)	BP	1347
MGI:2443235	HGNC:30339	RIMBP2	RIMS binding protein 2	KIAA0318,RBP2,MGC15831,RIM-BP2,PPP1R133	GO:0099508	voltage-gated ion channel activity involved in regulation of presynaptic membrane potential (GO:0099508)	BP	3956
MGI:101765	HGNC:1774	CDK5	cyclin dependent kinase 5	PSSALRE	GO:0099509	regulation of presynaptic cytosolic calcium levels (GO:0099509)	BP	80
MGI:2151013	HGNC:17072	ERC1	ELKS/RAB6-interacting/CAST family member 1	ELKS,KIAA1081,CAST2,MGC12974,RAB6IP2	GO:0099509	regulation of presynaptic cytosolic calcium levels (GO:0099509)	BP	333
MGI:109166	HGNC:3953	NCS1	neuronal calcium sensor 1	NCS-1,FREQ	GO:0099509	regulation of presynaptic cytosolic calcium levels (GO:0099509)	BP	713
MGI:1927338	HGNC:16874	SV2B	synaptic vesicle glycoprotein 2B	KIAA0735,HST19680	GO:0099509	regulation of presynaptic cytosolic calcium levels (GO:0099509)	BP	3651
MGI:1098749	HGNC:31922	ERC2	ELKS/RAB6-interacting/CAST family member 2	CAST,CAST1,KIAA0378,SPBC110,SPC110,ELKSL	GO:0099509	regulation of presynaptic cytosolic calcium levels (GO:0099509)	BP	3721
MGI:97595	HGNC:9393	PRKCA	protein kinase C alpha	PKCΑ,PKCA	GO:0099523	presynaptic cytosol (GO:0099523)	CC	68
MGI:97596	HGNC:9395	PRKCB	protein kinase C beta	PKCΒ,PRKCB2,PKCB,PRKCB1	GO:0099523	presynaptic cytosol (GO:0099523)	CC	69
MGI:107363	HGNC:11444	STXBP1	syntaxin binding protein 1	HUNC18,MUNC18-1,UNC18,RBSEC1	GO:0099523	presynaptic cytosol (GO:0099523)	CC	83
MGI:97599	HGNC:9401	PRKCE	protein kinase C epsilon		GO:0099523	presynaptic cytosol (GO:0099523)	CC	95
MGI:104560	HGNC:8016	NSF	N-ethylmaleimide sensitive factor, vesicle fusing ATPase	SKD2,SEC18	GO:0099523	presynaptic cytosol (GO:0099523)	CC	272
MGI:96067	HGNC:4851	HTT	huntingtin	IT15,HD	GO:0099523	presynaptic cytosol (GO:0099523)	CC	523
MGI:109166	HGNC:3953	NCS1	neuronal calcium sensor 1	NCS-1,FREQ	GO:0099523	presynaptic cytosol (GO:0099523)	CC	707
MGI:1924781	HGNC:24600	ANKS1B	ankyrin repeat and sterile alpha motif domain containing 1B	EB-1,AIDA-1,CAJALIN-2,ANKS2	GO:0099523	presynaptic cytosol (GO:0099523)	CC	756
MGI:96907	HGNC:6759	MARCKS	myristoylated alanine rich protein kinase C substrate	PKCSL,80K-L,MACS	GO:0099523	presynaptic cytosol (GO:0099523)	CC	826
MGI:88248	HGNC:1434	CALB1	calbindin 1	CALB	GO:0099523	presynaptic cytosol (GO:0099523)	CC	884
MGI:88256	HGNC:1460	CAMK2A	calcium/calmodulin dependent protein kinase II alpha	KIAA0968,CAMKIINALPHA,CAMKIIΑ,CAMKA	GO:0099523	presynaptic cytosol (GO:0099523)	CC	886
MGI:88548	HGNC:2460	CSNK2B	casein kinase 2 beta	CKB1,CKB2	GO:0099523	presynaptic cytosol (GO:0099523)	CC	960
MGI:700009	HGNC:10831	SH3GL2	SH3 domain containing GRB2 like 2, endophilin A1	SH3P4,SH3D2A,CNSA2,EEN-B1	GO:0099523	presynaptic cytosol (GO:0099523)	CC	2002
MGI:1889011	HGNC:11140	SNCB	synuclein beta		GO:0099523	presynaptic cytosol (GO:0099523)	CC	2445
MGI:99846	HGNC:4226	GDI1	GDP dissociation inhibitor 1	RABGDIA,XAP-4,OPHN2,FLJ41411,MRX48,MRX41,GDIL	GO:0099523	presynaptic cytosol (GO:0099523)	CC	2732
MGI:2443834	HGNC:9246	PPFIA2	PTPRF interacting protein alpha 2		GO:0099523	presynaptic cytosol (GO:0099523)	CC	2735
MGI:1860236	HGNC:17677	RABEP1	rabaptin, RAB GTPase binding effector protein 1	NEUROCRESCIN,RAB5EP,RABPT5,RABAPTIN-5	GO:0099523	presynaptic cytosol (GO:0099523)	CC	3979
MGI:2443834	HGNC:9246	PPFIA2	PTPRF interacting protein alpha 2		GO:0099523	presynaptic cytosol (GO:0099523)	CC	4172
MGI:2151013	HGNC:17072	ERC1	ELKS/RAB6-interacting/CAST family member 1	ELKS,KIAA1081,CAST2,MGC12974,RAB6IP2	GO:0099523	presynaptic cytosol (GO:0099523)	CC	4177
MGI:1339639	HGNC:8127	OGT	O-linked N-acetylglucosamine (GlcNAc) transferase	O-GLCNAC,HRNT1,MGC22921,FLJ23071,OGT1	GO:0099523	presynaptic cytosol (GO:0099523)	CC	4522
MGI:97613	HGNC:15917	PLCB1	phospholipase C beta 1	KIAA0581,PLC-I,PLC154	GO:0099524	postsynaptic cytosol (GO:0099524)	CC	473
MGI:109583	HGNC:9588	PTEN	phosphatase and tensin homolog	MMAC1,TEP1,PTEN1,BZS,MHAM	GO:0099524	postsynaptic cytosol (GO:0099524)	CC	497
MGI:96067	HGNC:4851	HTT	huntingtin	IT15,HD	GO:0099524	postsynaptic cytosol (GO:0099524)	CC	524
MGI:97297	HGNC:7727	NEDD4	NEDD4 E3 ubiquitin protein ligase	KIAA0093,MGC176705,NEDD4-1,RPF1	GO:0099524	postsynaptic cytosol (GO:0099524)	CC	538
MGI:109166	HGNC:3953	NCS1	neuronal calcium sensor 1	NCS-1,FREQ	GO:0099524	postsynaptic cytosol (GO:0099524)	CC	708
MGI:88248	HGNC:1434	CALB1	calbindin 1	CALB	GO:0099524	postsynaptic cytosol (GO:0099524)	CC	883
MGI:88256	HGNC:1460	CAMK2A	calcium/calmodulin dependent protein kinase II alpha	KIAA0968,CAMKIINALPHA,CAMKIIΑ,CAMKA	GO:0099524	postsynaptic cytosol (GO:0099524)	CC	887
MGI:1931838	HGNC:2695	DBN1	drebrin 1	D0S117E	GO:0099524	postsynaptic cytosol (GO:0099524)	CC	1434
MGI:95305	HGNC:3287	EIF4E	eukaryotic translation initiation factor 4E	EIF4E1,EIF4EL1,EIF4F	GO:0099524	postsynaptic cytosol (GO:0099524)	CC	1916
MGI:1928394	HGNC:3942	MTOR	mechanistic target of rapamycin kinase	RAFT1,RAPT1,FLJ44809,FRAP,FRAP2,FRAP1	GO:0099524	postsynaptic cytosol (GO:0099524)	CC	1917
MGI:1339639	HGNC:8127	OGT	O-linked N-acetylglucosamine (GlcNAc) transferase	O-GLCNAC,HRNT1,MGC22921,FLJ23071,OGT1	GO:0099524	postsynaptic cytosol (GO:0099524)	CC	4524
MGI:1350922	HGNC:1426	CADPS	calcium dependent secretion activator	CAPS,KIAA1121,CAPS1,UNC-31	GO:0099525	presynaptic dense core vesicle exocytosis (GO:0099525)	BP	493
MGI:2152971	HGNC:17282	RIMS1	regulating synaptic membrane exocytosis 1	RIM,KIAA0340,RIM1,RAB3IP2,CORD7	GO:0099525	presynaptic dense core vesicle exocytosis (GO:0099525)	BP	4028
MGI:98331	HGNC:11132	SNAP25	synaptosome associated protein 25	SNAP-25,RIC-4,RIC4,SEC9,BA416N4.2,DJ1068F16.2,SNAP	GO:0099525	presynaptic dense core vesicle exocytosis (GO:0099525)	BP	4033
MGI:1341299	HGNC:29125	DNM3	dynamin 3	KIAA0820	GO:0099525	presynaptic dense core vesicle exocytosis (GO:0099525)	BP	4064
MGI:107384	HGNC:2972	DNM1	dynamin 1	DNM	GO:0099525	presynaptic dense core vesicle exocytosis (GO:0099525)	BP	4064
MGI:109547	HGNC:2974	DNM2	dynamin 2	DYNII,DYN2,CMTDIB,CMTDI1,DI-CMTB,CMT2M	GO:0099525	presynaptic dense core vesicle exocytosis (GO:0099525)	BP	4064
MGI:1350922	HGNC:1426	CADPS	calcium dependent secretion activator	CAPS,KIAA1121,CAPS1,UNC-31	GO:0099525	presynaptic dense core vesicle exocytosis (GO:0099525)	BP	4065
MGI:105938	HGNC:9784	RAB5B	RAB5B, member RAS oncogene family		GO:0099525	presynaptic dense core vesicle exocytosis (GO:0099525)	BP	4068
MGI:107363	HGNC:11444	STXBP1	syntaxin binding protein 1	HUNC18,MUNC18-1,UNC18,RBSEC1	GO:0099525	presynaptic dense core vesicle exocytosis (GO:0099525)	BP	4072
MGI:1201685	HGNC:2494	CTBP1	C-terminal binding protein 1	BARS	GO:0099526	presynapse to nucleus signaling pathway (GO:0099526)	BP	376
MGI:1201685	HGNC:2494	CTBP1	C-terminal binding protein 1	BARS	GO:0099526	presynapse to nucleus signaling pathway (GO:0099526)	BP	928
MGI:88258	HGNC:1464	CAMK4	calcium/calmodulin dependent protein kinase IV	CAMK-GR,CAMKIV	GO:0099527	postsynapse to nucleus signaling pathway (GO:0099527)	BP	925
MGI:2142523	HGNC:16062	CRTC1	CREB regulated transcription coactivator 1	KIAA0616,FLJ14027,TORC1,MECT1	GO:0099527	postsynapse to nucleus signaling pathway (GO:0099527)	BP	966
MGI:1924781	HGNC:24600	ANKS1B	ankyrin repeat and sterile alpha motif domain containing 1B	EB-1,AIDA-1,CAJALIN-2,ANKS2	GO:0099527	postsynapse to nucleus signaling pathway (GO:0099527)	BP	974
MGI:103038	HGNC:11364	STAT3	signal transducer and activator of transcription 3	APRF	GO:0099527	postsynapse to nucleus signaling pathway (GO:0099527)	BP	1076
MGI:96067	HGNC:4851	HTT	huntingtin	IT15,HD	GO:0099527	postsynapse to nucleus signaling pathway (GO:0099527)	BP	1406
MGI:103560	HGNC:6394	KPNA1	karyopherin subunit alpha 1	SRP1,RCH2,NPI-1,IPOA5	GO:0099527	postsynapse to nucleus signaling pathway (GO:0099527)	BP	1413
MGI:1924657	HGNC:9774	RAB35	RAB35, member RAS oncogene family	H-RAY	GO:0099532	synaptic vesicle endosomal processing (GO:0099532)	BP	1105
MGI:2443456	HGNC:29203	TBC1D24	TBC1 domain family member 24	KIAA1171,TLDC6,DFNA65,DFNB86	GO:0099532	synaptic vesicle endosomal processing (GO:0099532)	BP	4151
MGI:88248	HGNC:1434	CALB1	calbindin 1	CALB	GO:0099534	calcium ion binding involved in regulation of presynaptic cytosolic calcium levels (GO:0099534)	BP	885
MGI:101914	HGNC:1435	CALB2	calbindin 2	CAL2	GO:0099534	calcium ion binding involved in regulation of presynaptic cytosolic calcium levels (GO:0099534)	BP	2290
MGI:1096389	HGNC:8010	NRXN3	neurexin 3	KIAA0743,C14ORF60	GO:0099537	trans-synaptic signaling (GO:0099537)	BP	3674
MGI:1096389	HGNC:8010	NRXN3	neurexin 3	KIAA0743,C14ORF60	GO:0099537	trans-synaptic signaling (GO:0099537)	BP	3675
MGI:95305	HGNC:3287	EIF4E	eukaryotic translation initiation factor 4E	EIF4E1,EIF4EL1,EIF4F	GO:0099537	trans-synaptic signaling (GO:0099537)	BP	3680
MGI:97815	HGNC:9681	PTPRS	protein tyrosine phosphatase receptor type S		GO:0099537	trans-synaptic signaling (GO:0099537)	BP	4203
MGI:97812	HGNC:9668	PTPRD	protein tyrosine phosphatase receptor type D	PTPD,HPTP	GO:0099537	trans-synaptic signaling (GO:0099537)	BP	4208
MGI:97812	HGNC:9668	PTPRD	protein tyrosine phosphatase receptor type D	PTPD,HPTP	GO:0099545	trans-synaptic signaling by trans-synaptic complex (GO:0099545)	BP	1825
MGI:1928394	HGNC:3942	MTOR	mechanistic target of rapamycin kinase	RAFT1,RAPT1,FLJ44809,FRAP,FRAP2,FRAP1	GO:0099547	regulation of translation at synapse, modulating synaptic transmission (GO:0099547)	BP	1869
MGI:108077	HGNC:17867	NPTN	neuroplastin	SDR1,GP55,GP65,NP65,NP55,SDFR1	GO:0099557	trans-synaptic signaling by trans-synaptic complex, modulating synaptic transmission (GO:0099557)	BP	24
MGI:2179061	HGNC:9102	PLXNA4	plexin A4	KIAA1550,DKFZP434G0625PRO34003,FAYV2820,PLXNA4A,PLXNA4B	GO:0099558	maintenance of synapse structure (GO:0099558)	BP	3128
MGI:1920243	HGNC:24035	APPL1	adaptor protein, phosphotyrosine interacting with PH domain and leucine zipper 1	APPL	GO:0099558	maintenance of synapse structure (GO:0099558)	BP	4122
MGI:1889272	HGNC:5951	CADM1	cell adhesion molecule 1	NECL2,ST17,BL2,SYNCAM,IGSF4A,NECL-2,SYNCAM1,RA175,TSLC1,IGSF4	GO:0099560	synapse adhesion between pre- and post-synapse (GO:0099560)	BP	1016
MGI:97815	HGNC:9681	PTPRS	protein tyrosine phosphatase receptor type S		GO:0099560	synapse adhesion between pre- and post-synapse (GO:0099560)	BP	2464
MGI:97812	HGNC:9668	PTPRD	protein tyrosine phosphatase receptor type D	PTPD,HPTP	GO:0099560	synapse adhesion between pre- and post-synapse (GO:0099560)	BP	2465
MGI:97815	HGNC:9681	PTPRS	protein tyrosine phosphatase receptor type S		GO:0099560	synapse adhesion between pre- and post-synapse (GO:0099560)	BP	2472
MGI:97812	HGNC:9668	PTPRD	protein tyrosine phosphatase receptor type D	PTPD,HPTP	GO:0099560	synapse adhesion between pre- and post-synapse (GO:0099560)	BP	2473
MGI:97815	HGNC:9681	PTPRS	protein tyrosine phosphatase receptor type S		GO:0099560	synapse adhesion between pre- and post-synapse (GO:0099560)	BP	2477
MGI:97812	HGNC:9668	PTPRD	protein tyrosine phosphatase receptor type D	PTPD,HPTP	GO:0099560	synapse adhesion between pre- and post-synapse (GO:0099560)	BP	2478
MGI:2179435	HGNC:14291	NLGN1	neuroligin 1	KIAA1070	GO:0099560	synapse adhesion between pre- and post-synapse (GO:0099560)	BP	2746
MGI:1096391	HGNC:8008	NRXN1	neurexin 1	KIAA0578,HS.22998	GO:0099560	synapse adhesion between pre- and post-synapse (GO:0099560)	BP	2747
MGI:96602	HGNC:6139	ITGA3	integrin subunit alpha 3	CD49C,VLA3A,VCA-2,GAP-B3,MSK18	GO:0099560	synapse adhesion between pre- and post-synapse (GO:0099560)	BP	3805
MGI:99435	HGNC:659	ARF6	ADP ribosylation factor 6		GO:0099562	maintenance of postsynaptic density structure (GO:0099562)	BP	2600
MGI:99435	HGNC:659	ARF6	ADP ribosylation factor 6		GO:0099562	maintenance of postsynaptic density structure (GO:0099562)	BP	2680
MGI:1924781	HGNC:24600	ANKS1B	ankyrin repeat and sterile alpha motif domain containing 1B	EB-1,AIDA-1,CAJALIN-2,ANKS2	GO:0099565	postsynaptic process involved in chemical synaptic transmission (GO:0099565)	BP	1296
MGI:1099446	HGNC:30672	SYNPO	synaptopodin	KIAA1029	GO:0099566	regulation of postsynaptic cytosolic calcium levels (GO:0099566)	BP	267
MGI:88248	HGNC:1434	CALB1	calbindin 1	CALB	GO:0099567	calcium ion binding involved in regulation of postsynaptic cytosolic calcium levels (GO:0099567)	BP	2289
MGI:96907	HGNC:6759	MARCKS	myristoylated alanine rich protein kinase C substrate	PKCSL,80K-L,MACS	GO:0099571	postsynaptic cytoskeleton (GO:0099571)	CC	825
MGI:2442233	HGNC:14561	ARHGEF9	Cdc42 guanine nucleotide exchange factor 9	KIAA0424,PEM-2	GO:0099572	postsynaptic specialization (GO:0099572)	CC	155
MGI:2138865	HGNC:24476	DLGAP4	DLG associated protein 4	DAP4,KIAA0964,SAPAP4	GO:0099572	postsynaptic specialization (GO:0099572)	CC	1716
MGI:109484	HGNC:12855	YWHAZ	tyrosine 3-monooxygenase/tryptophan 5-monooxygenase activation protein zeta	KCIP-1,14-3-3-ZETA,YWHAD	GO:0099572	postsynaptic specialization (GO:0099572)	CC	2839
MGI:894645	HGNC:9394	PICK1	protein interacting with PRKCA 1	DJ1039K5,MGC15204,PRKCABP	GO:0099572	postsynaptic specialization (GO:0099572)	CC	4163
MGI:2443834	HGNC:9246	PPFIA2	PTPRF interacting protein alpha 2		GO:0099572	postsynaptic specialization (GO:0099572)	CC	4175
MGI:97297	HGNC:7727	NEDD4	NEDD4 E3 ubiquitin protein ligase	KIAA0093,MGC176705,NEDD4-1,RPF1	GO:0099576	regulation of protein catabolic process at postsynapse, modulating synaptic transmission (GO:0099576)	BP	1854
MGI:1934029	HGNC:12631	USP8	ubiquitin specific peptidase 8	HUMORF8,KIAA0055,UBPY,SPG59	GO:0099576	regulation of protein catabolic process at postsynapse, modulating synaptic transmission (GO:0099576)	BP	2263
MGI:2446216	HGNC:13581	FBXO2	F-box protein 2	FBX2,NFB42,FBS1,FBG1,OCP1	GO:0099576	regulation of protein catabolic process at postsynapse, modulating synaptic transmission (GO:0099576)	BP	2965
MGI:95305	HGNC:3287	EIF4E	eukaryotic translation initiation factor 4E	EIF4E1,EIF4EL1,EIF4F	GO:0099578	regulation of translation at postsynapse, modulating synaptic transmission (GO:0099578)	BP	592
MGI:95305	HGNC:3287	EIF4E	eukaryotic translation initiation factor 4E	EIF4E1,EIF4EL1,EIF4F	GO:0099578	regulation of translation at postsynapse, modulating synaptic transmission (GO:0099578)	BP	1364
MGI:1338801	HGNC:13759	CYFIP1	cytoplasmic FMR1 interacting protein 1	KIAA0068,P140SRA-1,SHYC	GO:0099578	regulation of translation at postsynapse, modulating synaptic transmission (GO:0099578)	BP	1371
MGI:109482	HGNC:1388	CACNA1A	calcium voltage-gated channel subunit alpha1 A	CAV2.1,EA2,APCA,HPCA,FHM,CACNL1A4,SCA6,MHP1,MHP	GO:0099626	voltage-gated calcium channel activity involved in regulation of presynaptic cytosolic calcium levels (GO:0099626)	BP	411
MGI:88296	HGNC:1389	CACNA1B	calcium voltage-gated channel subunit alpha1 B	CAV2.2,CACNN,CACNL1A5	GO:0099626	voltage-gated calcium channel activity involved in regulation of presynaptic cytosolic calcium levels (GO:0099626)	BP	462
MGI:106217	HGNC:1392	CACNA1E	calcium voltage-gated channel subunit alpha1 E	CAV2.3,BII,CACH6,CACNL1A6	GO:0099626	voltage-gated calcium channel activity involved in regulation of presynaptic cytosolic calcium levels (GO:0099626)	BP	2419
MGI:894644	HGNC:1402	CACNB2	calcium voltage-gated channel auxiliary subunit beta 2	MYSB,CACNLB2	GO:0099626	voltage-gated calcium channel activity involved in regulation of presynaptic cytosolic calcium levels (GO:0099626)	BP	2420
MGI:103301	HGNC:1404	CACNB4	calcium voltage-gated channel auxiliary subunit beta 4	EJM4	GO:0099626	voltage-gated calcium channel activity involved in regulation of presynaptic cytosolic calcium levels (GO:0099626)	BP	2421
MGI:2443235	HGNC:30339	RIMBP2	RIMS binding protein 2	KIAA0318,RBP2,MGC15831,RIM-BP2,PPP1R133	GO:0099626	voltage-gated calcium channel activity involved in regulation of presynaptic cytosolic calcium levels (GO:0099626)	BP	3739
MGI:1277214	HGNC:25589	SEPTIN11	septin 11	FLJ10849,SEPT11	GO:0099629	postsynaptic specialization of symmetric synapse (GO:0099629)	CC	1717
MGI:105384	HGNC:5241	HSPA8	heat shock protein family A (Hsp70) member 8	HSC71,HSC70,HSP73,HSPA10	GO:0099634	postsynaptic specialization membrane (GO:0099634)	CC	2911
MGI:1340046	HGNC:201	ADAM22	ADAM metallopeptidase domain 22	MDC2	GO:0099645	neurotransmitter receptor localization to postsynaptic specialization membrane (GO:0099645)	BP	703
MGI:1927140	HGNC:4272	GIT1	GIT ArfGAP 1		GO:0099645	neurotransmitter receptor localization to postsynaptic specialization membrane (GO:0099645)	BP	1949
MGI:107231	HGNC:2900	DLG1	discs large MAGUK scaffold protein 1	SAP97,SAP-97,HDLG,DLGH1,DJ1061C18.1.1	GO:0099645	neurotransmitter receptor localization to postsynaptic specialization membrane (GO:0099645)	BP	2635
MGI:1277959	HGNC:2903	DLG4	discs large MAGUK scaffold protein 4	PSD-95,PSD95,SAP90,SAP-90	GO:0099645	neurotransmitter receptor localization to postsynaptic specialization membrane (GO:0099645)	BP	2636
MGI:107231	HGNC:2900	DLG1	discs large MAGUK scaffold protein 1	SAP97,SAP-97,HDLG,DLGH1,DJ1061C18.1.1	GO:0099645	neurotransmitter receptor localization to postsynaptic specialization membrane (GO:0099645)	BP	2741
MGI:1096389	HGNC:8010	NRXN3	neurexin 3	KIAA0743,C14ORF60	GO:0099645	neurotransmitter receptor localization to postsynaptic specialization membrane (GO:0099645)	BP	3098
MGI:99665	HGNC:11511	SYT3	synaptotagmin 3		GO:0099699	integral component of synaptic membrane (GO:0099699)	CC	1144
MGI:95757	HGNC:11007	SLC2A3	solute carrier family 2 member 3	GLUT3	GO:0099699	integral component of synaptic membrane (GO:0099699)	CC	2626
MGI:1913501	HGNC:661	ARFGAP3	ADP ribosylation factor GTPase activating protein 3	ARFGAP1	GO:0140238	presynaptic endocytosis (GO:0140238)	BP	3120
MGI:1914852	HGNC:24539	NECAP1	NECAP endocytosis associated 1	DKFZP566B183	GO:0140238	presynaptic endocytosis (GO:0140238)	BP	3999
MGI:1860040	HGNC:10064	TRIM3	tripartite motif containing 3	HAC1,BERP,RNF97,RNF22	GO:0140252	regulation protein catabolic process at postsynapse (GO:0140252)	BP	696
MGI:1347360	HGNC:2553	CUL3	cullin 3		GO:0140252	regulation protein catabolic process at postsynapse (GO:0140252)	BP	3040
MGI:97297	HGNC:7727	NEDD4	NEDD4 E3 ubiquitin protein ligase	KIAA0093,MGC176705,NEDD4-1,RPF1	GO:0140252	regulation protein catabolic process at postsynapse (GO:0140252)	BP	3679
MGI:1096391	HGNC:8008	NRXN1	neurexin 1	KIAA0578,HS.22998	GO:0150036	regulation of trans-synaptic signaling by endocannabinoid, modulating synaptic transmission (GO:0150036)	BP	895
MGI:1339975	HGNC:8590	PAK1	p21 (RAC1) activated kinase 1		GO:0150036	regulation of trans-synaptic signaling by endocannabinoid, modulating synaptic transmission (GO:0150036)	BP	2392
MGI:1916267	HGNC:30500	PRRT2	proline rich transmembrane protein 2	FLJ25513,DKFZP547J199,IFITMD1,FICCA,DSPB3,PKC,EKD1,ICCA,DYT10	GO:0150037	regulation of calcium-dependent activation of synaptic vesicle fusion (GO:0150037)	BP	2442
MGI:2152971	HGNC:17282	RIMS1	regulating synaptic membrane exocytosis 1	RIM,KIAA0340,RIM1,RAB3IP2,CORD7	GO:0150037	regulation of calcium-dependent activation of synaptic vesicle fusion (GO:0150037)	BP	3652
MGI:2443235	HGNC:30339	RIMBP2	RIMS binding protein 2	KIAA0318,RBP2,MGC15831,RIM-BP2,PPP1R133	GO:0150037	regulation of calcium-dependent activation of synaptic vesicle fusion (GO:0150037)	BP	3654
MGI:88296	HGNC:1389	CACNA1B	calcium voltage-gated channel subunit alpha1 B	CAV2.2,CACNN,CACNL1A5	GO:0150037	regulation of calcium-dependent activation of synaptic vesicle fusion (GO:0150037)	BP	3662
MGI:2151013	HGNC:17072	ERC1	ELKS/RAB6-interacting/CAST family member 1	ELKS,KIAA1081,CAST2,MGC12974,RAB6IP2	GO:0150037	regulation of calcium-dependent activation of synaptic vesicle fusion (GO:0150037)	BP	3719
MGI:1098749	HGNC:31922	ERC2	ELKS/RAB6-interacting/CAST family member 2	CAST,CAST1,KIAA0378,SPBC110,SPC110,ELKSL	GO:0150037	regulation of calcium-dependent activation of synaptic vesicle fusion (GO:0150037)	BP	3722
MGI:1335094	HGNC:1717	SEPTIN7	septin 7	CDC3,SEPT7A,CDC10,SEPT7	GO:0150050	postsynaptic septin cytoskeleton (GO:0150050)	CC	2978
MGI:1346863	HGNC:6872	MAPK10	mitogen-activated protein kinase 10	JNK3,P493F12,P54BSAPK,PRKM10	GO:0150051	postsynaptic Golgi apparatus (GO:0150051)	CC	2720
MGI:107423	HGNC:8060	NUMB	NUMB endocytic adaptor protein	C14ORF41	GO:0150052	regulation of postsynapse assembly (GO:0150052)	BP	2928
MGI:894702	HGNC:8061	NUMBL	NUMB like endocytic adaptor protein	NUMB-R,CTG3A,CAG3A,TNRC23,NUMBR,NUMBLIKE	GO:0150052	regulation of postsynapse assembly (GO:0150052)	BP	3707
MGI:87904	HGNC:132	ACTB	actin beta		GO:1900242	regulation of synaptic vesicle endocytosis (GO:1900242)	BP	409
MGI:1298224	HGNC:8996	PIP5K1C	phosphatidylinositol-4-phosphate 5-kinase type 1 gamma	PIP5KGAMMA,KIAA0589,LCCS3	GO:1900242	regulation of synaptic vesicle endocytosis (GO:1900242)	BP	733
MGI:87906	HGNC:144	ACTG1	actin gamma 1	ACTG,DFNA20,DFNA26	GO:1900242	regulation of synaptic vesicle endocytosis (GO:1900242)	BP	811
MGI:1859545	HGNC:11514	SYT7	synaptotagmin 7	IPCA-7,SYT-VII,MGC150517,PCANAP7	GO:1900242	regulation of synaptic vesicle endocytosis (GO:1900242)	BP	1322
MGI:107163	HGNC:9315	PPP3CB	protein phosphatase 3 catalytic subunit beta	CALNA2,CNA2,PP2BBETA,CALNB	GO:1900242	regulation of synaptic vesicle endocytosis (GO:1900242)	BP	1414
MGI:102918	HGNC:2856	DGKQ	diacylglycerol kinase theta	DAGK,DAGK7,DAGK4	GO:1900242	regulation of synaptic vesicle endocytosis (GO:1900242)	BP	1754
MGI:2444630	HGNC:2938	DMXL2	Dmx like 2	RC3,KIAA0856,DFNA71	GO:1901546	regulation of proton loading (GO:1901546)	BP	2178
MGI:1914416	HGNC:25564	ARL8B	ADP ribosylation factor like GTPase 8B	FLJ10702,GIE1,ARL10C	GO:1903742	regulation of anterograde synaptic vesicle transport (GO:1903742)	BP	209
MGI:95819	HGNC:4584	GRIN1	glutamate ionotropic receptor NMDA type subunit 1	GLUN1,NMDAR1	GO:1904315	transmitter-gated ion channel activity involved in regulation of postsynaptic membrane potential (GO:1904315)	BP	1969
MGI:87891	HGNC:1962	CHRNB2	cholinergic receptor nicotinic beta 2 subunit		GO:1904315	transmitter-gated ion channel activity involved in regulation of postsynaptic membrane potential (GO:1904315)	BP	1983
MGI:87888	HGNC:1958	CHRNA4	cholinergic receptor nicotinic alpha 4 subunit	BFNC,EBN,EBN1	GO:1904315	transmitter-gated ion channel activity involved in regulation of postsynaptic membrane potential (GO:1904315)	BP	1992
MGI:87891	HGNC:1962	CHRNB2	cholinergic receptor nicotinic beta 2 subunit		GO:1904315	transmitter-gated ion channel activity involved in regulation of postsynaptic membrane potential (GO:1904315)	BP	1993
MGI:95809	HGNC:4572	GRIA2	glutamate ionotropic receptor AMPA type subunit 2	GLUA2,GLURB,GLUR2	GO:1904315	transmitter-gated ion channel activity involved in regulation of postsynaptic membrane potential (GO:1904315)	BP	2032
MGI:95809	HGNC:4572	GRIA2	glutamate ionotropic receptor AMPA type subunit 2	GLUA2,GLURB,GLUR2	GO:1904315	transmitter-gated ion channel activity involved in regulation of postsynaptic membrane potential (GO:1904315)	BP	2479
MGI:95810	HGNC:4573	GRIA3	glutamate ionotropic receptor AMPA type subunit 3	GLUA3,GLURC,MRX94,GLUR3	GO:1904315	transmitter-gated ion channel activity involved in regulation of postsynaptic membrane potential (GO:1904315)	BP	2483
MGI:96659	HGNC:6220	KCNA2	potassium voltage-gated channel subfamily A member 2	KV1.2,HK4	GO:1905030	voltage-gated ion channel activity involved in regulation of postsynaptic membrane potential (GO:1905030)	BP	192
MGI:105368	HGNC:815	ATP2B2	ATPase plasma membrane Ca2+ transporting 2	PMCA2	GO:1905059	ATPase-coupled calcium ion transmembrane transporter activity involved in regulation of postsynaptic cytosolic calcium levels (GO:1905059)	BP	1476
MGI:107956	HGNC:11068	SLC8A1	solute carrier family 8 member A1	NCX1	GO:1905060	calcium:cation antiporter activity involved in regulation of postsynaptic cytosolic calcium ion levels (GO:1905060)	BP	839
MGI:107996	HGNC:11069	SLC8A2	solute carrier family 8 member A2	NCX2,KIAA1087	GO:1905060	calcium:cation antiporter activity involved in regulation of postsynaptic cytosolic calcium ion levels (GO:1905060)	BP	845
MGI:1338801	HGNC:13759	CYFIP1	cytoplasmic FMR1 interacting protein 1	KIAA0068,P140SRA-1,SHYC	GO:1905274	regulation of modification of postsynaptic actin cytoskeleton (GO:1905274)	BP	461
MGI:96907	HGNC:6759	MARCKS	myristoylated alanine rich protein kinase C substrate	PKCSL,80K-L,MACS	GO:1905274	regulation of modification of postsynaptic actin cytoskeleton (GO:1905274)	BP	829
MGI:1338069	HGNC:6183	ITSN1	intersectin 1	SH3P17,MGC134948,MGC134949,SH3D1A,ITSN	GO:1905274	regulation of modification of postsynaptic actin cytoskeleton (GO:1905274)	BP	1179
MGI:1930780	HGNC:7568	MYH10	myosin heavy chain 10	NMMHCB	GO:1905274	regulation of modification of postsynaptic actin cytoskeleton (GO:1905274)	BP	2140
MGI:1096342	HGNC:667	RHOA	ras homolog family member A	RHO12,RHOH12,ARH12,ARHA	GO:1905274	regulation of modification of postsynaptic actin cytoskeleton (GO:1905274)	BP	2147
MGI:99435	HGNC:659	ARF6	ADP ribosylation factor 6		GO:1905606	regulation of presynapse assembly (GO:1905606)	BP	2681
MGI:1096391	HGNC:8008	NRXN1	neurexin 1	KIAA0578,HS.22998	GO:1905606	regulation of presynapse assembly (GO:1905606)	BP	2749
MGI:101765	HGNC:1774	CDK5	cyclin dependent kinase 5	PSSALRE	GO:1905806	regulation of synapse disassembly (GO:1905806)	BP	2423
MGI:98277	HGNC:3388	EPHA4	EPH receptor A4	HEK8,TYRO1	GO:1905806	regulation of synapse disassembly (GO:1905806)	BP	2449
MGI:1333745	HGNC:17145	SNAPIN	SNAP associated protein	BLOC1S7,BORCS3,SNAPAP	GO:2000300	regulation of synaptic vesicle exocytosis (GO:2000300)	BP	41
MGI:97595	HGNC:9393	PRKCA	protein kinase C alpha	PKCΑ,PKCA	GO:2000300	regulation of synaptic vesicle exocytosis (GO:2000300)	BP	70
MGI:97596	HGNC:9395	PRKCB	protein kinase C beta	PKCΒ,PRKCB2,PKCB,PRKCB1	GO:2000300	regulation of synaptic vesicle exocytosis (GO:2000300)	BP	71
MGI:109166	HGNC:3953	NCS1	neuronal calcium sensor 1	NCS-1,FREQ	GO:2000300	regulation of synaptic vesicle exocytosis (GO:2000300)	BP	723
MGI:2443834	HGNC:9246	PPFIA2	PTPRF interacting protein alpha 2		GO:2000300	regulation of synaptic vesicle exocytosis (GO:2000300)	BP	935
MGI:98467	HGNC:11506	SYP	synaptophysin	MRX96	GO:2000300	regulation of synaptic vesicle exocytosis (GO:2000300)	BP	1134
MGI:1922459	HGNC:30670	SV2C	synaptic vesicle glycoprotein 2C		GO:2000300	regulation of synaptic vesicle exocytosis (GO:2000300)	BP	1207
MGI:2443815	HGNC:30757	STXBP5L	syntaxin binding protein 5 like	KIAA1006,LLGL4	GO:2000300	regulation of synaptic vesicle exocytosis (GO:2000300)	BP	1257
MGI:2443815	HGNC:30757	STXBP5L	syntaxin binding protein 5 like	KIAA1006,LLGL4	GO:2000300	regulation of synaptic vesicle exocytosis (GO:2000300)	BP	1395
MGI:1927140	HGNC:4272	GIT1	GIT ArfGAP 1		GO:2000300	regulation of synaptic vesicle exocytosis (GO:2000300)	BP	1783
MGI:106217	HGNC:1392	CACNA1E	calcium voltage-gated channel subunit alpha1 E	CAV2.3,BII,CACH6,CACNL1A6	GO:2000300	regulation of synaptic vesicle exocytosis (GO:2000300)	BP	2443
MGI:103301	HGNC:1404	CACNB4	calcium voltage-gated channel auxiliary subunit beta 4	EJM4	GO:2000300	regulation of synaptic vesicle exocytosis (GO:2000300)	BP	2444
MGI:94941	HGNC:3084	DVL1	dishevelled segment polarity protein 1		GO:2000300	regulation of synaptic vesicle exocytosis (GO:2000300)	BP	2808
MGI:1927338	HGNC:16874	SV2B	synaptic vesicle glycoprotein 2B	KIAA0735,HST19680	GO:2000300	regulation of synaptic vesicle exocytosis (GO:2000300)	BP	3795
MGI:1914724	HGNC:11133	SNAP29	synaptosome associated protein 29	SNAP-29,CEDNIK	GO:2000300	regulation of synaptic vesicle exocytosis (GO:2000300)	BP	3796
MGI:1915058	HGNC:27007	TPRG1L	tumor protein p63 regulated 1 like	RP11-46F15.3,FLJ21811,FAM79A	GO:2000300	regulation of synaptic vesicle exocytosis (GO:2000300)	BP	4205
MGI:2442535	HGNC:31399	SLC6A17	solute carrier family 6 member 17		SYNGO:metabolism	metabolism	BP	750
MGI:2147363	HGNC:11054	SLC6A7	solute carrier family 6 member 7	PROT	SYNGO:metabolism	metabolism	BP	783
MGI:2147363	HGNC:11054	SLC6A7	solute carrier family 6 member 7	PROT	SYNGO:metabolism	metabolism	BP	1360
MGI:95640	HGNC:4141	GAPDH	glyceraldehyde-3-phosphate dehydrogenase	GAPD	SYNGO:postsyn_ATPmetabolic	ATP metabolic process in the postsynapse	BP	2395
MGI:1098703	HGNC:10819	SGTA	small glutamine rich tetratricopeptide repeat containing alpha	SGT	SYNGO:presyn_chaperoneProteinFolding	presynaptic chaperone-mediated protein folding	BP	1763
MGI:892995	HGNC:16235	DNAJC5	DnaJ heat shock protein family (Hsp40) member C5	FLJ00118,FLJ13070,DNAJC5A,CLN4	SYNGO:presyn_chaperoneProteinFolding	presynaptic chaperone-mediated protein folding	BP	2358
MGI:105384	HGNC:5241	HSPA8	heat shock protein family A (Hsp70) member 8	HSC71,HSC70,HSP73,HSPA10	SYNGO:presyn_chaperoneProteinFolding	presynaptic chaperone-mediated protein folding	BP	2359
MGI:1349763	HGNC:3014	DPYSL2	dihydropyrimidinase like 2	DRP-2,DHPRP2,CRMP2,DRP2	SYNGO:transport	transport	BP	1628

## Sheet: SynGOmatches
your genelist input	gene hgnc_id	gene symbol	gene name	gene synonyms
MGI:106913	HGNC:24011	ABI2	abl interactor 2	ABI-2,AIP-1,ABI2B,ABLBP3,ARGBPIA,SSH3BP2
MGI:2442582	HGNC:29132	ABLIM3	actin binding LIM protein family member 3	KIAA0843
MGI:107771	HGNC:81	ABR	ABR activator of RhoGEF and GTPase	MDB
MGI:87876	HGNC:108	ACHE	acetylcholinesterase (Cartwright blood group)	YT
MGI:87904	HGNC:132	ACTB	actin beta
MGI:87906	HGNC:144	ACTG1	actin gamma 1	ACTG,DFNA20,DFNA26
MGI:2137706	HGNC:163	ACTN1	actinin alpha 1
MGI:1913963	HGNC:169	ACTR2	actin related protein 2	ARP2
MGI:1340046	HGNC:201	ADAM22	ADAM metallopeptidase domain 22	MDC2
MGI:99677	HGNC:232	ADCY1	adenylate cyclase 1	AC1,DFNB44
MGI:87918	HGNC:243	ADD1	adducin 1
MGI:87919	HGNC:244	ADD2	adducin 2	ADDB
MGI:1351615	HGNC:245	ADD3	adducin 3	ADDL
MGI:1929461	HGNC:20973	ADGRL1	adhesion G protein-coupled receptor L1	KIAA0821,CIRL1,LEC2,LPHN1
MGI:3580016	HGNC:16921	AGAP2	ArfGAP with GTPase domain, ankyrin repeat and PH domain 2	CENTG1
MGI:2183446	HGNC:16923	AGAP3	ArfGAP with GTPase domain, ankyrin repeat and PH domain 3	CENTG3
MGI:1932576	HGNC:370	AKAP12	A-kinase anchoring protein 12	AKAP250,SSECKS
MGI:1929955	HGNC:380	AKR1A1	aldo-keto reductase family 1 member A1	ALR,DD3
MGI:103574	HGNC:471	AMPH	amphiphysin
MGI:1924781	HGNC:24600	ANKS1B	ankyrin repeat and sterile alpha motif domain containing 1B	EB-1,AIDA-1,CAJALIN-2,ANKS2
MGI:101919	HGNC:555	AP1G1	adaptor related protein complex 1 subunit gamma 1	CLAPG1,ADTG
MGI:1919020	HGNC:563	AP2B1	adaptor related protein complex 2 subunit beta 1	ADTB2,CLAPB1
MGI:1298405	HGNC:564	AP2M1	adaptor related protein complex 2 subunit mu 1	AP50,MU2,CLAPM1
MGI:107734	HGNC:568	AP3D1	adaptor related protein complex 3 subunit delta 1	ADTD
MGI:1860297	HGNC:578	APBA1	amyloid beta precursor protein binding family A member 1	D9S411E,X11,MINT1
MGI:1261791	HGNC:579	APBA2	amyloid beta precursor protein binding family A member 2	D15S1518E,LIN-10,MGC:14091,HST16821,X11L,MINT2
MGI:107765	HGNC:581	APBB1	amyloid beta precursor protein binding family B member 1	FE65,RIR
MGI:1920243	HGNC:24035	APPL1	adaptor protein, phosphotyrosine interacting with PH domain and leucine zipper 1	APPL
MGI:99433	HGNC:655	ARF4	ADP ribosylation factor 4	ARF2
MGI:99435	HGNC:659	ARF6	ADP ribosylation factor 6
MGI:2183559	HGNC:15852	ARFGAP1	ADP ribosylation factor GTPase activating protein 1	FLJ10767,BA261N11.3,ARF1GAP
MGI:1913501	HGNC:661	ARFGAP3	ADP ribosylation factor GTPase activating protein 3	ARFGAP1
MGI:2442233	HGNC:14561	ARHGEF9	Cdc42 guanine nucleotide exchange factor 9	KIAA0424,PEM-2
MGI:1914416	HGNC:25564	ARL8B	ADP ribosylation factor like GTPase 8B	FLJ10702,GIE1,ARL10C
MGI:1921442	HGNC:23366	ARPC5L	actin related protein 2/3 complex subunit 5 like	MGC3038,ARC16-2
MGI:1342335	HGNC:2720	ASAP1	ArfGAP with SH3 domain, ankyrin repeat and PH domain 1	PAP,KIAA1249,ZG14P,CENTB4,DDEF1
MGI:88107	HGNC:801	ATP1A3	ATPase Na+/K+ transporting subunit alpha 3	DYT12
MGI:105368	HGNC:815	ATP2B2	ATPase plasma membrane Ca2+ transporting 2	PMCA2
MGI:88111	HGNC:817	ATP2B4	ATPase plasma membrane Ca2+ transporting 4	PMCA4,ATP2B2,MXRA1
MGI:103286	HGNC:865	ATP6V0A1	ATPase H+ transporting V0 subunit a1	A1,VPH1,STV1,VPP1,ATP6N1,ATP6N1A
MGI:1201778	HGNC:13724	ATP6V0D1	ATPase H+ transporting V0 subunit d1	ATP6DV,VATX,VPATPD,P39,VMA6,ATP6D
MGI:1201780	HGNC:851	ATP6V1A	ATPase H+ transporting V1 subunit A	VMA1,VA68,VPP2,ATP6A1,ATP6V1A1
MGI:109618	HGNC:854	ATP6V1B2	ATPase H+ transporting V1 subunit B2	VATB,VMA2,HO57,VPP3,ATP6B2
MGI:1921084	HGNC:13527	ATP6V1D	ATPase H+ transporting V1 subunit D	VATD,VMA8,ATP6M
MGI:894326	HGNC:857	ATP6V1E1	ATPase H+ transporting V1 subunit E1	P31,VMA4,ATP6E2,ATP6E,ATP6V1E
MGI:1913394	HGNC:16832	ATP6V1F	ATPase H+ transporting V1 subunit F	ATP6S14,VATF,VMA7
MGI:1913487	HGNC:862	ATP6V1G2	ATPase H+ transporting V1 subunit G2	VMA10,NG38,EM:AC004181.3,ATP6G,ATP6G2
MGI:1914864	HGNC:18303	ATP6V1H	ATPase H+ transporting V1 subunit H	CGI-11,SFD,VMA13,SFDALPHA,SFDBETA
MGI:88141	HGNC:1014	BCR	BCR activator of RhoGEF and GTPase	D22S662,CML,PHL,ALL,D22S11,BCR1
MGI:3044626	HGNC:24163	BEGAIN	brain enriched guanylate kinase associated	KIAA1446
MGI:108092	HGNC:1052	BIN1	bridging integrator 1	SH3P9,AMPH2,AMPHL
MGI:1277955	HGNC:1117	BSN	bassoon presynaptic cytomatrix protein	ZNF231
MGI:109482	HGNC:1388	CACNA1A	calcium voltage-gated channel subunit alpha1 A	CAV2.1,EA2,APCA,HPCA,FHM,CACNL1A4,SCA6,MHP1,MHP
MGI:88296	HGNC:1389	CACNA1B	calcium voltage-gated channel subunit alpha1 B	CAV2.2,CACNN,CACNL1A5
MGI:106217	HGNC:1392	CACNA1E	calcium voltage-gated channel subunit alpha1 E	CAV2.3,BII,CACH6,CACNL1A6
MGI:88295	HGNC:1399	CACNA2D1	calcium voltage-gated channel auxiliary subunit alpha2delta 1	LNCRNA-N3,CACNL2A,CACNA2,MHS3,LINC01112
MGI:102522	HGNC:1401	CACNB1	calcium voltage-gated channel auxiliary subunit beta 1	CACNLB1
MGI:894644	HGNC:1402	CACNB2	calcium voltage-gated channel auxiliary subunit beta 2	MYSB,CACNLB2
MGI:103301	HGNC:1404	CACNB4	calcium voltage-gated channel auxiliary subunit beta 4	EJM4
MGI:1889272	HGNC:5951	CADM1	cell adhesion molecule 1	NECL2,ST17,BL2,SYNCAM,IGSF4A,NECL-2,SYNCAM1,RA175,TSLC1,IGSF4
MGI:2137858	HGNC:17601	CADM3	cell adhesion molecule 3	BIGR,FLJ10698,TSLL1,NECL1,SYNCAM3,NECL-1,IGSF4B
MGI:1350922	HGNC:1426	CADPS	calcium dependent secretion activator	CAPS,KIAA1121,CAPS1,UNC-31
MGI:2443963	HGNC:16018	CADPS2	calcium dependent secretion activator 2	CAPS2
MGI:88248	HGNC:1434	CALB1	calbindin 1	CALB
MGI:101914	HGNC:1435	CALB2	calbindin 2	CAL2
MGI:1098535	HGNC:1459	CAMK1	calcium/calmodulin dependent protein kinase I	CAMKI,CAMKI-ALPHA
MGI:88256	HGNC:1460	CAMK2A	calcium/calmodulin dependent protein kinase II alpha	KIAA0968,CAMKIINALPHA,CAMKIIΑ,CAMKA
MGI:88257	HGNC:1461	CAMK2B	calcium/calmodulin dependent protein kinase II beta	CAM2,CAMK2,CAMKIIΒ,CAMKB
MGI:88258	HGNC:1464	CAMK4	calcium/calmodulin dependent protein kinase IV	CAMK-GR,CAMKIV
MGI:1914502	HGNC:20039	CAP2	cyclase associated actin cytoskeleton regulatory protein 2
MGI:104652	HGNC:1491	CAPZB	capping actin protein of muscle Z-line subunit beta
MGI:2442952	HGNC:20879	CASKIN1	CASK interacting protein 1	KIAA1306,ANKS5A
MGI:1330281	HGNC:14258	CD2AP	CD2 associated protein	CMS
MGI:106211	HGNC:1736	CDC42	cell division cycle 42	G25K,CDC42HS
MGI:99217	HGNC:1750	CDH11	cadherin 11	OB,CAD11
MGI:101765	HGNC:1774	CDK5	cyclin dependent kinase 5	PSSALRE
MGI:101757	HGNC:1874	CFL1	cofilin 1	CFL
MGI:87888	HGNC:1958	CHRNA4	cholinergic receptor nicotinic alpha 4 subunit	BFNC,EBN,EBN1
MGI:87891	HGNC:1962	CHRNB2	cholinergic receptor nicotinic beta 2 subunit
MGI:894297	HGNC:2090	CLTA	clathrin light chain A	LCA
MGI:1921575	HGNC:2091	CLTB	clathrin light chain B	LCB
MGI:2388633	HGNC:2092	CLTC	clathrin heavy chain	HC,CLTCL2
MGI:2661175	HGNC:19701	CNKSR2	connector enhancer of kinase suppressor of Ras 2	KIAA0902,CNK2,KSR2
MGI:1919244	HGNC:2157	CNN3	calponin 3
MGI:104518	HGNC:2172	CNTN2	contactin 2	TAG-1,TAX1,TAX,AXT
MGI:1914047	HGNC:13830	CNTNAP2	contactin associated protein 2	CASPR2,KIAA0868,NRXN4
MGI:2183572	HGNC:18747	CNTNAP4	contactin associated protein family member 4	CASPR4,KIAA1763
MGI:1345961	HGNC:2252	CORO1A	coronin 1A	HCORO1,P57,CORONIN-1
MGI:2443075	HGNC:21746	CPEB3	cytoplasmic polyadenylation element binding protein 3	KIAA0940
MGI:104727	HGNC:2309	CPLX1	complexin 1	CPX-I
MGI:104726	HGNC:2310	CPLX2	complexin 2	CPX-2,DKFZP547D155
MGI:1334445	HGNC:2319	CPNE6	copine 6
MGI:88508	HGNC:2362	CRK	CRK proto-oncogene, adaptor protein
MGI:2142523	HGNC:16062	CRTC1	CREB regulated transcription coactivator 1	KIAA0616,FLJ14027,TORC1,MECT1
MGI:88548	HGNC:2460	CSNK2B	casein kinase 2 beta	CKB1,CKB2
MGI:1201685	HGNC:2494	CTBP1	C-terminal binding protein 1	BARS
MGI:88275	HGNC:2510	CTNNA2	catenin alpha 2	CAP-R,CT114
MGI:1195966	HGNC:2516	CTNND2	catenin delta 2	NPRAP,GT24
MGI:99695	HGNC:3338	CTTN	cortactin	EMS1
MGI:1347360	HGNC:2553	CUL3	cullin 3
MGI:1338801	HGNC:13759	CYFIP1	cytoplasmic FMR1 interacting protein 1	KIAA0068,P140SRA-1,SHYC
MGI:1924134	HGNC:13760	CYFIP2	cytoplasmic FMR1 interacting protein 2	PIR121
MGI:1931838	HGNC:2695	DBN1	drebrin 1	D0S117E
MGI:700006	HGNC:2696	DBNL	drebrin like	SH3P7,HIP-55,ABP1
MGI:94869	HGNC:2701	DCC	DCC netrin 1 receptor	IGDCC1,NTN1R1
MGI:1889276	HGNC:2852	DGKE	diacylglycerol kinase epsilon	DAGK6,DGK
MGI:102918	HGNC:2856	DGKQ	diacylglycerol kinase theta	DAGK,DAGK7,DAGK4
MGI:107231	HGNC:2900	DLG1	discs large MAGUK scaffold protein 1	SAP97,SAP-97,HDLG,DLGH1,DJ1061C18.1.1
MGI:1277959	HGNC:2903	DLG4	discs large MAGUK scaffold protein 4	PSD-95,PSD95,SAP90,SAP-90
MGI:2138865	HGNC:24476	DLGAP4	DLG associated protein 4	DAP4,KIAA0964,SAPAP4
MGI:2444630	HGNC:2938	DMXL2	Dmx like 2	RC3,KIAA0856,DFNA71
MGI:892995	HGNC:16235	DNAJC5	DnaJ heat shock protein family (Hsp40) member C5	FLJ00118,FLJ13070,DNAJC5A,CLN4
MGI:1919935	HGNC:15469	DNAJC6	DnaJ heat shock protein family (Hsp40) member C6	KIAA0473,PARK19
MGI:107384	HGNC:2972	DNM1	dynamin 1	DNM
MGI:1921256	HGNC:2973	DNM1L	dynamin 1 like	DRP1,DVLP,HDYNIV,DYMPLE,VPS1
MGI:109547	HGNC:2974	DNM2	dynamin 2	DYNII,DYN2,CMTDIB,CMTDI1,DI-CMTB,CMT2M
MGI:1341299	HGNC:29125	DNM3	dynamin 3	KIAA0820
MGI:1349763	HGNC:3014	DPYSL2	dihydropyrimidinase like 2	DRP-2,DHPRP2,CRMP2,DRP2
MGI:1349762	HGNC:3015	DPYSL3	dihydropyrimidinase like 3	DRP-3,ULIP,CRMP4
MGI:94941	HGNC:3084	DVL1	dishevelled segment polarity protein 1
MGI:1915347	HGNC:24596	DYNLL2	dynein light chain LC8-type 2	MGC17810,DLC2,DNCL1B,RSPH22
MGI:1096317	HGNC:3192	EEF1A2	eukaryotic translation elongation factor 1 alpha 2	EEF1AL,HS1,STNL,STN
MGI:1913906	HGNC:3211	EEF1D	eukaryotic translation elongation factor 1 delta	EF-1D,FLJ20897
MGI:1341878	HGNC:3242	EHD1	EH domain containing 1	H-PAST,HPAST1,FLJ42622,FLJ44618,PAST1
MGI:95299	HGNC:3265	EIF2S1	eukaryotic translation initiation factor 2 subunit alpha	EIF-2ALPHA,EIF2A,EIF2
MGI:99257	HGNC:3277	EIF3E	eukaryotic translation initiation factor 3 subunit E	EIF3-P48,INT6,EIF3S6
MGI:2386251	HGNC:18138	EIF3L	eukaryotic translation initiation factor 3 subunit L	HSPC021,HSPC025,EIF3S11,EIF3S6IP,EIF3EIP
MGI:95304	HGNC:3285	EIF4B	eukaryotic translation initiation factor 4B
MGI:95305	HGNC:3287	EIF4E	eukaryotic translation initiation factor 4E	EIF4E1,EIF4EL1,EIF4F
MGI:109198	HGNC:3289	EIF4EBP2	eukaryotic translation initiation factor 4E binding protein 2
MGI:2384784	HGNC:3296	EIF4G1	eukaryotic translation initiation factor 4 gamma 1	P220,PARK18,EIF4G,EIF4F
MGI:1923935	HGNC:3298	EIF4G3	eukaryotic translation initiation factor 4 gamma 3	EIF4GII
MGI:95309	HGNC:3299	EIF5	eukaryotic translation initiation factor 5
MGI:106248	HGNC:3300	EIF5A	eukaryotic translation initiation factor 5A	EIF5A1,EIF-5A,MGC99547,MGC104255
MGI:98277	HGNC:3388	EPHA4	EPH receptor A4	HEK8,TYRO1
MGI:1333763	HGNC:21604	EPN1	epsin 1
MGI:104684	HGNC:3420	EPS8	epidermal growth factor receptor pathway substrate 8
MGI:2151013	HGNC:17072	ERC1	ELKS/RAB6-interacting/CAST family member 1	ELKS,KIAA1081,CAST2,MGC12974,RAB6IP2
MGI:1098749	HGNC:31922	ERC2	ELKS/RAB6-interacting/CAST family member 2	CAST,CAST1,KIAA0378,SPBC110,SPC110,ELKSL
MGI:1096376	HGNC:30389	EXOC4	exocyst complex component 4	KIAA1699,MGC27170,SEC8,SEC8P,SEC8L1
MGI:2446216	HGNC:13581	FBXO2	F-box protein 2	FBX2,NFB42,FBS1,FBG1,OCP1
MGI:95541	HGNC:3711	FKBP1A	FKBP prolyl isomerase 1A	FKBP-12,FKBP12,PKC12,PPIASE,FKBP12C,FKBP1
MGI:103309	HGNC:3758	FLOT2	flotillin 2	ESA,ESA1,ECS-1,ECS1,M17S1
MGI:104860	HGNC:4023	FXR1	FMR1 autosomal homolog 1
MGI:95602	HGNC:4037	FYN	FYN proto-oncogene, Src family tyrosine kinase	SYN,SLK,MGC45350
MGI:2386030	HGNC:4507	GABBR2	gamma-aminobutyric acid type B receptor subunit 2	HG20,GABABR2,GPRC3B,GPR51
MGI:95639	HGNC:4140	GAP43	growth associated protein 43	B-50,PP46,GAP-43
MGI:95640	HGNC:4141	GAPDH	glyceraldehyde-3-phosphate dehydrogenase	GAPD
MGI:99846	HGNC:4226	GDI1	GDP dissociation inhibitor 1	RABGDIA,XAP-4,OPHN2,FLJ41411,MRX48,MRX41,GDIL
MGI:99845	HGNC:4227	GDI2	GDP dissociation inhibitor 2	RABGDIB
MGI:1926252	HGNC:1226	GIPC1	GIPC PDZ domain containing family member 1	TIP-2,HS.6454,GIPC,SEMCAP,GLUT1CBP,SYNECTIN,NIP,C19ORF3,RGS19IP1
MGI:1927140	HGNC:4272	GIT1	GIT ArfGAP 1
MGI:95772	HGNC:4385	GNAI2	G protein subunit alpha i2	GIP,GNAI2B
MGI:107671	HGNC:4460	GPM6A	glycoprotein M6A	GPM6
MGI:95809	HGNC:4572	GRIA2	glutamate ionotropic receptor AMPA type subunit 2	GLUA2,GLURB,GLUR2
MGI:95810	HGNC:4573	GRIA3	glutamate ionotropic receptor AMPA type subunit 3	GLUA3,GLURC,MRX94,GLUR3
MGI:95819	HGNC:4584	GRIN1	glutamate ionotropic receptor NMDA type subunit 1	GLUN1,NMDAR1
MGI:1921303	HGNC:18708	GRIP1	glutamate receptor interacting protein 1
MGI:1859616	HGNC:18706	GRIPAP1	GRIP1 associated protein 1	GRASP-1,GRASP1,KIAA1167,MPMGP800B12492Q3,DKFZP434P0630
MGI:87940	HGNC:289	GRK2	G protein-coupled receptor kinase 2	BARK1,ADRBK1
MGI:87941	HGNC:290	GRK3	G protein-coupled receptor kinase 3	BARK2,ADRBK2
MGI:1351338	HGNC:4593	GRM1	glutamate metabotropic receptor 1	GPRC1A,MGLU1,MGLUR1,PPP1R85
MGI:1351339	HGNC:4594	GRM2	glutamate metabotropic receptor 2	GPRC1B,MGLU2,MGLUR2
MGI:1351342	HGNC:4597	GRM5	glutamate metabotropic receptor 5	MGLUR5,GPRC1E,MGLU5,PPP1R86
MGI:1861437	HGNC:4617	GSK3B	glycogen synthase kinase 3 beta
MGI:1352504	HGNC:18415	HIP1R	huntingtin interacting protein 1 related	KIAA0655,HIP3,HIP12,FLJ14000,ILWEQ
MGI:1917171	HGNC:24941	HNRNPA3	heterogeneous nuclear ribonucleoprotein A3	HNRPA3
MGI:99894	HGNC:5044	HNRNPK	heterogeneous nuclear ribonucleoprotein K	CSBP,TUNP,HNRPK
MGI:96250	HGNC:5253	HSP90AA1	heat shock protein 90 alpha family class A member 1	HSP89,HSP90,FLJ31884,HSP90N,HSPC1,HSPCA
MGI:105384	HGNC:5241	HSPA8	heat shock protein family A (Hsp70) member 8	HSC71,HSC70,HSP73,HSPA10
MGI:96067	HGNC:4851	HTT	huntingtin	IT15,HD
MGI:1196356	HGNC:29112	IQSEC1	IQ motif and Sec7 domain ArfGEF 1	KIAA0763,GEP100,BRAG2,ARF-GEP100
MGI:96602	HGNC:6139	ITGA3	integrin subunit alpha 3	CD49C,VLA3A,VCA-2,GAP-B3,MSK18
MGI:1338069	HGNC:6183	ITSN1	intersectin 1	SH3P17,MGC134948,MGC134949,SH3D1A,ITSN
MGI:96659	HGNC:6220	KCNA2	potassium voltage-gated channel subfamily A member 2	KV1.2,HK4
MGI:96661	HGNC:6222	KCNA4	potassium voltage-gated channel subfamily A member 4	KV1.4,HK1,HPCN2,KCNA4L
MGI:109239	HGNC:6229	KCNAB2	potassium voltage-gated channel subfamily A regulatory beta subunit 2	AKR6A5,KCNA2B,HKVBETA2.1,HKVBETA2.2
MGI:1928743	HGNC:6239	KCND3	potassium voltage-gated channel subfamily D member 3	KV4.3,KSHIVB,SCA22,SCA19
MGI:104781	HGNC:6267	KCNJ6	potassium inwardly rectifying channel subfamily J member 6	KIR3.2,GIRK2,KATP2,BIR1,HIGIRK2,KCNJ7
MGI:99923	HGNC:6284	KCNMA1	potassium calcium-activated channel subfamily M alpha 1	KCA1.1,MSLO1,SLO
MGI:109564	HGNC:6323	KIF5A	kinesin family member 5A	D12S1889,NKHC,MY050,SPG10
MGI:103560	HGNC:6394	KPNA1	karyopherin subunit alpha 1	SRP1,RCH2,NPI-1,IPOA5
MGI:96721	HGNC:6470	L1CAM	L1 cell adhesion molecule	CD171,HSAS1,SPG1,HSAS,MASA,MIC5,S10
MGI:109656	HGNC:6513	LASP1	LIM and SH3 protein 1	MLN50,LASP-1
MGI:2135609	HGNC:17787	LIN7A	lin-7 homolog A, crumbs cell polarity complex component	MALS-1,TIP-33,LIN-7A,VELI1
MGI:2444672	HGNC:6766	MADD	MAP kinase activating death domain	DENN,KIAA0358,RAB3GEP
MGI:1203522	HGNC:946	MAGI1	membrane associated guanylate kinase, WW and PDZ domain containing 1	BAP1,MAGI-1,TNRC19,AIP3,WWP3,BAIAP1
MGI:1354953	HGNC:18957	MAGI2	membrane associated guanylate kinase, WW and PDZ domain containing 2	AIP1,ARIP1,KIAA0705,ACVRIP1,MAGI-2
MGI:1923484	HGNC:29647	MAGI3	membrane associated guanylate kinase, WW and PDZ domain containing 3	MAGI-3
MGI:1915661	HGNC:6838	MAP1LC3A	microtubule associated protein 1 light chain 3 alpha	MAP1BLC3,MAP1ALC3,LC3,LC3A,ATG8E
MGI:97175	HGNC:6839	MAP2	microtubule associated protein 2	MAP2A,MAP2B,MAP2C
MGI:1346866	HGNC:6840	MAP2K1	mitogen-activated protein kinase kinase 1	MEK1,MAPKK1,PRKMK1
MGI:1346858	HGNC:6871	MAPK1	mitogen-activated protein kinase 1	ERK,ERK2,P41MAPK,MAPK2,PRKM2,PRKM1
MGI:1346863	HGNC:6872	MAPK10	mitogen-activated protein kinase 10	JNK3,P493F12,P54BSAPK,PRKM10
MGI:1346859	HGNC:6877	MAPK3	mitogen-activated protein kinase 3	ERK1,P44MAPK,P44ERK1,PRKM3
MGI:1346861	HGNC:6881	MAPK8	mitogen-activated protein kinase 8	JNK,JNK1,SAPK1,PRKM8
MGI:96907	HGNC:6759	MARCKS	myristoylated alanine rich protein kinase C substrate	PKCSL,80K-L,MACS
MGI:99638	HGNC:3332	MARK2	microtubule affinity regulating kinase 2	PAR-1,PAR1B,PAR-1B,EMK1
MGI:1928394	HGNC:3942	MTOR	mechanistic target of rapamycin kinase	RAFT1,RAPT1,FLJ44809,FRAP,FRAP2,FRAP1
MGI:1930780	HGNC:7568	MYH10	myosin heavy chain 10	NMMHCB
MGI:104563	HGNC:7641	NAPA	NSF attachment protein alpha
MGI:104562	HGNC:15751	NAPB	NSF attachment protein beta	SNAP-BETA,SNAPB
MGI:104561	HGNC:7642	NAPG	NSF attachment protein gamma
MGI:1347075	HGNC:7648	NBEA	neurobeachin	KIAA1544,BCL8B,FLJ10197,LYST2
MGI:1355333	HGNC:7666	NCKAP1	NCK associated protein 1	NAP1,HEM2,NAP125
MGI:109166	HGNC:3953	NCS1	neuronal calcium sensor 1	NCS-1,FREQ
MGI:1914852	HGNC:24539	NECAP1	NECAP endocytosis associated 1	DKFZP566B183
MGI:1926483	HGNC:9706	NECTIN1	nectin cell adhesion molecule 1	PRR,PRR1,PVRR1,SK-12,HIGR,CLPED1,CD111,OFC7,HVEC,ED4,PVRL1
MGI:1930171	HGNC:17664	NECTIN3	nectin cell adhesion molecule 3	NECTIN-3,PPR3,PVRR3,DKFZP566B0846,CDW113,CD113,PVRL3
MGI:97297	HGNC:7727	NEDD4	NEDD4 E3 ubiquitin protein ligase	KIAA0093,MGC176705,NEDD4-1,RPF1
MGI:97306	HGNC:7765	NF1	neurofibromin 1
MGI:2179435	HGNC:14291	NLGN1	neuroligin 1	KIAA1070
MGI:108077	HGNC:17867	NPTN	neuroplastin	SDR1,GP55,GP65,NP65,NP55,SDFR1
MGI:1096391	HGNC:8008	NRXN1	neurexin 1	KIAA0578,HS.22998
MGI:1096362	HGNC:8009	NRXN2	neurexin 2
MGI:1096389	HGNC:8010	NRXN3	neurexin 3	KIAA0743,C14ORF60
MGI:104560	HGNC:8016	NSF	N-ethylmaleimide sensitive factor, vesicle fusing ATPase	SKD2,SEC18
MGI:107423	HGNC:8060	NUMB	NUMB endocytic adaptor protein	C14ORF41
MGI:894702	HGNC:8061	NUMBL	NUMB like endocytic adaptor protein	NUMB-R,CTG3A,CAG3A,TNRC23,NUMBR,NUMBLIKE
MGI:1339639	HGNC:8127	OGT	O-linked N-acetylglucosamine (GlcNAc) transferase	O-GLCNAC,HRNT1,MGC22921,FLJ23071,OGT1
MGI:1349722	HGNC:8554	PABPC1	poly(A) binding protein cytoplasmic 1	PABP1,PABPL1,PAB1,PABPC2
MGI:1345181	HGNC:8570	PACSIN1	protein kinase C and casein kinase substrate in neurons 1	SDPI
MGI:1345153	HGNC:8571	PACSIN2	protein kinase C and casein kinase substrate in neurons 2	SDPII
MGI:109520	HGNC:8574	PAFAH1B1	platelet activating factor acetylhydrolase 1b regulatory subunit 1	LIS1,PAFAH,NUDF,MDCR,MDS
MGI:1339975	HGNC:8590	PAK1	p21 (RAC1) activated kinase 1
MGI:1339656	HGNC:8592	PAK3	p21 (RAC1) activated kinase 3	HPAK3,BPAK,MRX30,MRX47
MGI:1345635	HGNC:8647	PCBP1	poly(rC) binding protein 1	HNRPE1,HNRNP-E1,HNRPX,HNRNP-X
MGI:108202	HGNC:8648	PCBP2	poly(rC) binding protein 2	HNRPE2,HNRNP-E2,HNRNPE2
MGI:1349390	HGNC:13406	PCLO	piccolo presynaptic cytomatrix protein	KIAA0559,DKFZP779G1236,ACZ
MGI:97549	HGNC:8881	PFN1	profilin 1
MGI:97550	HGNC:8882	PFN2	profilin 2
MGI:2385902	HGNC:15514	PICALM	phosphatidylinositol binding clathrin assembly protein	CALM,CLTH
MGI:894645	HGNC:9394	PICK1	protein interacting with PRKCA 1	DJ1039K5,MGC15204,PRKCABP
MGI:1298224	HGNC:8996	PIP5K1C	phosphatidylinositol-4-phosphate 5-kinase type 1 gamma	PIP5KGAMMA,KIAA0589,LCCS3
MGI:97613	HGNC:15917	PLCB1	phospholipase C beta 1	KIAA0581,PLC-I,PLC154
MGI:106530	HGNC:23496	PLPPR4	phospholipid phosphatase related 4	PRG-1,LPPR4,KIAA0455,PHP1
MGI:104807	HGNC:9091	PLS3	plastin 3	T-PLASTIN
MGI:2179061	HGNC:9102	PLXNA4	plexin A4	KIAA1550,DKFZP434G0625PRO34003,FAYV2820,PLXNA4A,PLXNA4B
MGI:2443834	HGNC:9246	PPFIA2	PTPRF interacting protein alpha 2
MGI:1924037	HGNC:9247	PPFIA3	PTPRF interacting protein alpha 3	KIAA0654,LPNA3,MGC126567,MGC126569
MGI:2442087	HGNC:18583	PPM1H	protein phosphatase, Mg2+/Mn2+ dependent 1H	KIAA1157,FLJ13253,NERPP-2C,ARHCL1
MGI:104872	HGNC:9283	PPP1CC	protein phosphatase 1 catalytic subunit gamma	PP1C,PP1GAMMA
MGI:1321159	HGNC:9299	PPP2CA	protein phosphatase 2 catalytic subunit alpha	PP2CALPHA,PP2AC
MGI:1926334	HGNC:9302	PPP2R1A	protein phosphatase 2 scaffold subunit Aalpha	PR65A,PP2A-AALPHA,PP2AA
MGI:1919228	HGNC:9304	PPP2R2A	protein phosphatase 2 regulatory subunit Balpha	PR52A,PR55A,B55A,PR55ALPHA,B55ALPHA
MGI:107164	HGNC:9314	PPP3CA	protein phosphatase 3 catalytic subunit alpha	CNA1,PPP2B,CALN,CALNA
MGI:107163	HGNC:9315	PPP3CB	protein phosphatase 3 catalytic subunit beta	CALNA2,CNA2,PP2BBETA,CALNB
MGI:107172	HGNC:9317	PPP3R1	protein phosphatase 3 regulatory subunit B, alpha	CALNB1,CNB,CNB1
MGI:97592	HGNC:9380	PRKACA	protein kinase cAMP-activated catalytic subunit alpha	PKACA
MGI:97759	HGNC:9390	PRKAR1B	protein kinase cAMP-dependent type I regulatory subunit beta
MGI:97760	HGNC:9392	PRKAR2B	protein kinase cAMP-dependent type II regulatory subunit beta	PRKAR2
MGI:97595	HGNC:9393	PRKCA	protein kinase C alpha	PKCΑ,PKCA
MGI:97596	HGNC:9395	PRKCB	protein kinase C beta	PKCΒ,PRKCB2,PKCB,PRKCB1
MGI:97599	HGNC:9401	PRKCE	protein kinase C epsilon
MGI:1916267	HGNC:30500	PRRT2	proline rich transmembrane protein 2	FLJ25513,DKFZP547J199,IFITMD1,FICCA,DSPB3,PKC,EKD1,ICCA,DYT10
MGI:1921252	HGNC:19092	PSD2	pleckstrin and Sec7 domain containing 2	DKFZP761B0514,EFA6C
MGI:109583	HGNC:9588	PTEN	phosphatase and tensin homolog	MMAC1,TEP1,PTEN1,BZS,MHAM
MGI:2144837	HGNC:14406	PTPN23	protein tyrosine phosphatase non-receptor type 23	DKFZP564F0923,KIAA1471,HD-PTP
MGI:97812	HGNC:9668	PTPRD	protein tyrosine phosphatase receptor type D	PTPD,HPTP
MGI:107418	HGNC:9677	PTPRN2	protein tyrosine phosphatase receptor type N2	KIAA0387,PHOGRIN,ICAAR,IA-2BETA
MGI:97815	HGNC:9681	PTPRS	protein tyrosine phosphatase receptor type S
MGI:103079	HGNC:9701	PURA	purine rich element binding protein A	PURALPHA,PUR1,PUR-ALPHA
MGI:1915615	HGNC:16524	RAB14	RAB14, member RAS oncogene family	FBP,RAB-14
MGI:102790	HGNC:14244	RAB18	RAB18, member RAS oncogene family
MGI:97842	HGNC:9758	RAB1A	RAB1A, member RAS oncogene family	YPT1,RAB1
MGI:1923558	HGNC:18370	RAB1B	RAB1B, member RAS oncogene family
MGI:894308	HGNC:18263	RAB21	RAB21, member RAS oncogene family	KIAA0118
MGI:1931295	HGNC:9767	RAB27B	RAB27B, member RAS oncogene family
MGI:1928750	HGNC:9763	RAB2A	RAB2A, member RAS oncogene family	RAB2
MGI:1924657	HGNC:9774	RAB35	RAB35, member RAS oncogene family	H-RAY
MGI:97843	HGNC:9777	RAB3A	RAB3A, member RAS oncogene family
MGI:1917158	HGNC:9778	RAB3B	RAB3B, member RAS oncogene family
MGI:1914545	HGNC:30269	RAB3C	RAB3C, member RAS oncogene family
MGI:105069	HGNC:9781	RAB4A	RAB4A, member RAS oncogene family	HRES-1/RAB4,RAB4
MGI:105926	HGNC:9783	RAB5A	RAB5A, member RAS oncogene family	RAB5
MGI:105938	HGNC:9784	RAB5B	RAB5B, member RAS oncogene family
MGI:105306	HGNC:9785	RAB5C	RAB5C, member RAS oncogene family	RAB5CL,RABL
MGI:894313	HGNC:9786	RAB6A	RAB6A, member RAS oncogene family	RAB6
MGI:107283	HGNC:14902	RAB6B	RAB6B, member RAS oncogene family
MGI:1860236	HGNC:17677	RABEP1	rabaptin, RAB GTPase binding effector protein 1	NEUROCRESCIN,RAB5EP,RABPT5,RABAPTIN-5
MGI:97845	HGNC:9801	RAC1	Rac family small GTPase 1	TC-25,P21-RAC1,RAC-1
MGI:1927243	HGNC:9839	RALA	RAS like proto-oncogene A	RAL
MGI:108466	HGNC:9841	RALBP1	ralA binding protein 1	RLIP76,RIP1,RIP
MGI:97855	HGNC:9861	RAP2A	RAP2A, member of RAS oncogene family	K-REV,RAP2
MGI:1917723	HGNC:16626	RAPGEF4	Rap guanine nucleotide exchange factor 4	CAMP-GEFII,CGEF2
MGI:1346089	HGNC:10003	RGS7	regulator of G protein signaling 7
MGI:106334	HGNC:23271	RGS7BP	regulator of G protein signaling 7 binding protein	R7BP
MGI:97912	HGNC:10011	RHEB	Ras homolog, mTORC1 binding	RHEB2
MGI:1096342	HGNC:667	RHOA	ras homolog family member A	RHO12,RHOH12,ARH12,ARHA
MGI:107949	HGNC:668	RHOB	ras homolog family member B	RHOH6,MST081,ARH6,ARHB
MGI:2443235	HGNC:30339	RIMBP2	RIMS binding protein 2	KIAA0318,RBP2,MGC15831,RIM-BP2,PPP1R133
MGI:2152971	HGNC:17282	RIMS1	regulating synaptic membrane exocytosis 1	RIM,KIAA0340,RIM1,RAB3IP2,CORD7
MGI:107926	HGNC:10252	ROCK2	Rho associated coiled-coil containing protein kinase 2
MGI:102788	HGNC:17056	RPH3A	rabphilin 3A	KIAA0985,RABPHILIN,EXOPHILIN-1
MGI:1915835	HGNC:14085	RTN4	reticulon 4	NSP-CL,KIAA0886,NOGO,ASY
MGI:1933169	HGNC:17059	SACM1L	SAC1 like phosphatidylinositide phosphatase	SAC1,KIAA0851
MGI:1349480	HGNC:10563	SCAMP1	secretory carrier membrane protein 1	SCAMP37
MGI:98246	HGNC:10585	SCN1A	sodium voltage-gated channel alpha subunit 1	NAV1.1,GEFSP2,HBSCI,NAC1,SMEI,SCN1,FEB3
MGI:98248	HGNC:10588	SCN2A	sodium voltage-gated channel alpha subunit 2	NAV1.2,HBSCII,HBSCI,SCN2A1,SCN2A2
MGI:103169	HGNC:10596	SCN8A	sodium voltage-gated channel alpha subunit 8	NAV1.6,NACH6,PN4,CERIII,CIAT,MED
MGI:1917188	HGNC:22192	SCRN1	secernin 1	KIAA0193
MGI:1338759	HGNC:10700	SEC22B	SEC22 homolog B, vesicle trafficking protein	ERS-24,SEC22L1
MGI:1277214	HGNC:25589	SEPTIN11	septin 11	FLJ10849,SEPT11
MGI:1345148	HGNC:10750	SEPTIN3	septin 3	SEP3,SEPT3
MGI:1195461	HGNC:9164	SEPTIN5	septin 5	HCDCREL-1,H5,PNUTL1,SEPT5
MGI:1335094	HGNC:1717	SEPTIN7	septin 7	CDC3,SEPT7A,CDC10,SEPT7
MGI:894310	HGNC:16511	SEPTIN8	septin 8	KIAA0202,SEP2,SEPT8
MGI:1920344	HGNC:25412	SGIP1	SH3GL interacting endocytic adaptor 1	DKFZP761D221
MGI:1098703	HGNC:10819	SGTA	small glutamine rich tetratricopeptide repeat containing alpha	SGT
MGI:700010	HGNC:10830	SH3GL1	SH3 domain containing GRB2 like 1, endophilin A2	SH3P8,SH3D2B,CNSA1,EEN,MGC111371
MGI:700009	HGNC:10831	SH3GL2	SH3 domain containing GRB2 like 2, endophilin A1	SH3P4,SH3D2A,CNSA2,EEN-B1
MGI:2385131	HGNC:10834	SH3GLB2	SH3 domain containing GRB2 like, endophilin B2	KIAA1848
MGI:3613677	HGNC:15474	SHANK1	SH3 and multiple ankyrin repeat domains 1	SSTRIP,SPANK-1,SYNAMON
MGI:2671987	HGNC:14295	SHANK2	SH3 and multiple ankyrin repeat domains 2	CTTNBP1,PROSAP1,SHANK,SPANK-3,CORTBP1
MGI:2443679	HGNC:20284	SIPA1L1	signal induced proliferation associated 1 like 1	KIAA0440,E6TP1,SPAR1
MGI:3606480	HGNC:22980	SLC10A4	solute carrier family 10 member 4	MGC29802
MGI:106677	HGNC:10935	SLC18A2	solute carrier family 18 member A2	SVMT,SVAT,VMAT2
MGI:105083	HGNC:10939	SLC1A1	solute carrier family 1 member 1	EAAC1,EAAT3
MGI:95757	HGNC:11007	SLC2A3	solute carrier family 2 member 3	GLUT3
MGI:96955	HGNC:11026	SLC3A2	solute carrier family 3 member 2	4T2HC,4F2,NACAE,CD98,CD98HC,4F2HC,MDU1
MGI:95627	HGNC:11042	SLC6A1	solute carrier family 6 member 1	GAT1,GABATR,GABATHG
MGI:2442535	HGNC:31399	SLC6A17	solute carrier family 6 member 17
MGI:94862	HGNC:11049	SLC6A3	solute carrier family 6 member 3	DAT,DAT1
MGI:2147363	HGNC:11054	SLC6A7	solute carrier family 6 member 7	PROT
MGI:107956	HGNC:11068	SLC8A1	solute carrier family 8 member A1	NCX1
MGI:107996	HGNC:11069	SLC8A2	solute carrier family 8 member A2	NCX2,KIAA1087
MGI:98331	HGNC:11132	SNAP25	synaptosome associated protein 25	SNAP-25,RIC-4,RIC4,SEC9,BA416N4.2,DJ1068F16.2,SNAP
MGI:1914724	HGNC:11133	SNAP29	synaptosome associated protein 29	SNAP-29,CEDNIK
MGI:1915076	HGNC:30669	SNAP47	synaptosome associated protein 47	SVAP1,SNAP-47,C1ORF142
MGI:109132	HGNC:14986	SNAP91	synaptosome associated protein 91	KIAA0656,AP180,CALM
MGI:1333745	HGNC:17145	SNAPIN	SNAP associated protein	BLOC1S7,BORCS3,SNAPAP
MGI:1277151	HGNC:11138	SNCA	synuclein alpha	NACP,PD1,PARK1,PARK4
MGI:1889011	HGNC:11140	SNCB	synuclein beta
MGI:1928395	HGNC:11172	SNX1	sorting nexin 1	SNX1A,MGC8664,HST17379,VPS5
MGI:1923992	HGNC:20073	SNX27	sorting nexin 27	MY014,KIAA0488,MGC20471
MGI:1916400	HGNC:11175	SNX4	sorting nexin 4	ATG24B
MGI:1919433	HGNC:14970	SNX6	sorting nexin 6
MGI:98386	HGNC:11273	SPTAN1	spectrin alpha, non-erythrocytic 1
MGI:98388	HGNC:11275	SPTBN1	spectrin beta, non-erythrocytic 1
MGI:103038	HGNC:11364	STAT3	signal transducer and activator of transcription 3	APRF
MGI:1922250	HGNC:17848	STK38L	serine/threonine kinase 38 like	KIAA0965,NDR2
MGI:1923396	HGNC:11431	STX16	syntaxin 16	HSYN16,SYN16
MGI:109355	HGNC:11433	STX1A	syntaxin 1A	HPC-1,P35-1,STX1
MGI:1930705	HGNC:18539	STX1B	syntaxin 1B	STX1B1,STX1B2
MGI:1858210	HGNC:11442	STX7	syntaxin 7
MGI:107363	HGNC:11444	STXBP1	syntaxin binding protein 1	HUNC18,MUNC18-1,UNC18,RBSEC1
MGI:2443815	HGNC:30757	STXBP5L	syntaxin binding protein 5 like	KIAA1006,LLGL4
MGI:1927139	HGNC:20566	SV2A	synaptic vesicle glycoprotein 2A	SV2,KIAA0736
MGI:1927338	HGNC:16874	SV2B	synaptic vesicle glycoprotein 2B	KIAA0735,HST19680
MGI:1922459	HGNC:30670	SV2C	synaptic vesicle glycoprotein 2C
MGI:1915916	HGNC:25417	SVOP	SV2 related protein	DKFZP761H039
MGI:98460	HGNC:11494	SYN1	synapsin I	MRX50
MGI:1328323	HGNC:11498	SYNGR1	synaptogyrin 1
MGI:1341881	HGNC:11501	SYNGR3	synaptogyrin 3
MGI:1354961	HGNC:11503	SYNJ1	synaptojanin 1	INPP5G,PARK20
MGI:1099446	HGNC:30672	SYNPO	synaptopodin	KIAA1029
MGI:98467	HGNC:11506	SYP	synaptophysin	MRX96
MGI:108081	HGNC:11507	SYPL1	synaptophysin like 1	SYPL
MGI:99667	HGNC:11509	SYT1	synaptotagmin 1	P65,SYT,SVP65
MGI:99665	HGNC:11511	SYT3	synaptotagmin 3
MGI:1859545	HGNC:11514	SYT7	synaptotagmin 7	IPCA-7,SYT-VII,MGC150517,PCANAP7
MGI:2444121	HGNC:30212	TANC2	tetratricopeptide repeat, ankyrin repeat and coiled-coil containing 2	DKFZP564D166,FLJ10215,FLJ11824,KIAA1148,KIAA1636,ROLS,ROLSA
MGI:1915919	HGNC:16835	TAOK2	TAO kinase 2	TAO1,KIAA0881,PSK,PSK1,TAO2,MAP3K17
MGI:2443456	HGNC:29203	TBC1D24	TBC1 domain family member 24	KIAA1171,TLDC6,DFNA65,DFNB86
MGI:107749	HGNC:12005	TPD52	tumor protein D52	D52,HD52,N8L
MGI:1915058	HGNC:27007	TPRG1L	tumor protein p63 regulated 1 like	RP11-46F15.3,FLJ21811,FAM79A
MGI:1860040	HGNC:10064	TRIM3	tripartite motif containing 3	HAC1,BERP,RNF97,RNF22
MGI:1929183	HGNC:12362	TSC1	TSC complex subunit 1	KIAA0243,LAM,HAMARTIN,TSC
MGI:102548	HGNC:12363	TSC2	TSC complex subunit 2	TUBERIN,LAM,PPP1R160,TSC4
MGI:1298407	HGNC:11854	TSPAN7	tetraspanin 7	DXS1692E,TALLA-1,A15,CD231,MXS1,TM4SF2,MRX58
MGI:1889007	HGNC:13476	TTYH1	tweety family member 1
MGI:107812	HGNC:20778	TUBB	tubulin beta class I	OK/SW-CL.56,MGC16435,M40,TUBB5
MGI:1920960	HGNC:30829	TUBB2B	tubulin beta 2B class IIb	MGC8685,DKFZP566F223,BA506K6.1
MGI:105098	HGNC:12496	UBE3A	ubiquitin protein ligase E3A	AS,ANCR,E6-AP,FLJ26981,EPVE6AP,HPVE6A
MGI:1916977	HGNC:20075	USP46	ubiquitin specific peptidase 46	FLJ12552
MGI:1934029	HGNC:12631	USP8	ubiquitin specific peptidase 8	HUMORF8,KIAA0055,UBPY,SPG59
MGI:2157980	HGNC:25507	VAC14	VAC14 component of PIKFYVE complex	FLJ10305,ARPIKFYVE,TAX1BP2
MGI:1313277	HGNC:12643	VAMP2	vesicle associated membrane protein 2	VAMP-2,SYB2
MGI:1096399	HGNC:11486	VAMP7	vesicle associated membrane protein 7	VAMP-7,TI-VAMP,SYBL1
MGI:102889	HGNC:2464	VCAN	versican	PG-M,CSPG2
MGI:99919	HGNC:12666	VCP	valosin containing protein	IBMPFD,P97,CDC48,TERA
MGI:106919	HGNC:12669	VDAC1	voltage dependent anion channel 1	MGC111064,PORIN
MGI:891965	HGNC:14579	VPS45	vacuolar protein sorting 45 homolog	H-VPS45,H1,VPS45B,VPS45A
MGI:1890563	HGNC:12732	WASF1	WASP family member 1	WAVE1,SCAR1,KIAA0269,WAVE
MGI:2658986	HGNC:12734	WASF3	WASP family member 3	WAVE3,SCAR3,KIAA0900
MGI:1860197	HGNC:13490	WDR7	WD repeat domain 7	KIAA0541,TRAG
MGI:2442092	HGNC:14540	WNK1	WNK lysine deficient protein kinase 1	HSAN2,PPP1R167,PRKWNK1,HSN2
MGI:894689	HGNC:12851	YWHAE	tyrosine 3-monooxygenase/tryptophan 5-monooxygenase activation protein epsilon	FLJ45465
MGI:108109	HGNC:12852	YWHAG	tyrosine 3-monooxygenase/tryptophan 5-monooxygenase activation protein gamma	PPP1R170,14-3-3GAMMA,14-3-3Γ
MGI:109194	HGNC:12853	YWHAH	tyrosine 3-monooxygenase/tryptophan 5-monooxygenase activation protein eta	YWHA1
MGI:891963	HGNC:12854	YWHAQ	tyrosine 3-monooxygenase/tryptophan 5-monooxygenase activation protein theta	HS1,14-3-3
MGI:109484	HGNC:12855	YWHAZ	tyrosine 3-monooxygenase/tryptophan 5-monooxygenase activation protein zeta	KCIP-1,14-3-3-ZETA,YWHAD
MGI:1923573	HGNC:18472	ZDHHC5	zinc finger DHHC-type palmitoyltransferase 5	KIAA1748,ZNF375,DHHC5
MGI:101857
MGI:101920
MGI:101921
MGI:101924
MGI:102462
MGI:102465
MGI:102666
MGI:102690
MGI:102703
MGI:102704
MGI:102765
MGI:102776
MGI:102809
MGI:103008
MGI:103009
MGI:103025
MGI:103035
MGI:103063
MGI:103072
MGI:103078
MGI:103123
MGI:103147
MGI:103149
MGI:103202
MGI:103251
MGI:103307
MGI:104513
MGI:104627
MGI:104630
MGI:104632
MGI:104681
MGI:104708
MGI:104709
MGI:104753
MGI:104767
MGI:104799
MGI:104810
MGI:104848
MGI:104861
MGI:104871
MGI:104889
MGI:104966
MGI:105053
MGI:105065
MGI:105933
MGI:105941
MGI:105992
MGI:106039
MGI:106054
MGI:106271
MGI:106295
MGI:106321
MGI:106387
MGI:106402
MGI:106484
MGI:106485
MGI:106504
MGI:106594
MGI:106613
MGI:106906
MGI:106915
MGI:106916
MGI:106921
MGI:106922
MGI:107183
MGI:107185
MGI:107186
MGI:107194
MGI:107301
MGI:107422
MGI:107438
MGI:107448
MGI:107566
MGI:107592
MGI:107685
MGI:107733
MGI:107738
MGI:107743
MGI:107745
MGI:107750
MGI:107777
MGI:107793
MGI:107804
MGI:107813
MGI:107814
MGI:107815
MGI:107846
MGI:107848
MGI:107851
MGI:107861
MGI:107913
MGI:107943
MGI:107953
MGI:107978
MGI:107995
MGI:108041
MGI:108048
MGI:108051
MGI:108054
MGI:108091
MGI:108117
MGI:108278
MGI:108360
MGI:108390
MGI:108391
MGI:108414
MGI:108450
MGI:108554
MGI:108563
MGI:109127
MGI:109130
MGI:109137
MGI:109188
MGI:109263
MGI:109283
MGI:109338
MGI:109350
MGI:109373
MGI:109490
MGI:109531
MGI:1095401
MGI:1095406
MGI:1095407
MGI:1095410
MGI:109555
MGI:109589
MGI:109601
MGI:109606
MGI:1096367
MGI:1096368
MGI:109638
MGI:1096584
MGI:1096875
MGI:1096881
MGI:1097159
MGI:1098233
MGI:1098234
MGI:1098236
MGI:1098266
MGI:1098267
MGI:1098268
MGI:1098567
MGI:1098586
MGI:1098784
MGI:1098808
MGI:1098827
MGI:1100520
MGI:1100836
MGI:1100848
MGI:1100863
MGI:1100869
MGI:1101358
MGI:1194500
MGI:1194884
MGI:1194899
MGI:1195456
MGI:1196260
MGI:1196314
MGI:1196332
MGI:1196412
MGI:1197518
MGI:1197524
MGI:1201407
MGI:1201408
MGI:1201670
MGI:1201679
MGI:1201690
MGI:1201781
MGI:1261814
MGI:1261820
MGI:1261835
MGI:1261912
MGI:1270129
MGI:1270839
MGI:1274781
MGI:1277113
MGI:1277137
MGI:1277223
MGI:1277953
MGI:1278328
MGI:1289308
MGI:1289332
MGI:1298205
MGI:1298397
MGI:1306776
MGI:1306778
MGI:1309464
MGI:1309503
MGI:1309515
MGI:1309528
MGI:1313136
MGI:1314653
MGI:1316687
MGI:1316727
MGI:1316728
MGI:1321133
MGI:1321151
MGI:1321161
MGI:1328313
MGI:1329014
MGI:1329037
MGI:1330276
MGI:1330826
MGI:1330858
MGI:1330861
MGI:1332236
MGI:1332637
MGI:1333112
MGI:1333752
MGI:1333753
MGI:1333754
MGI:1333757
MGI:1333766
MGI:1333804
MGI:1333854
MGI:1333870
MGI:1334433
MGI:1335107
MGI:1336192
MGI:1336199
MGI:1336209
MGI:1337100
MGI:1338002
MGI:1338026
MGI:1338068
MGI:1338800
MGI:1341070
MGI:1341217
MGI:1341264
MGI:1341265
MGI:1341822
MGI:1341836
MGI:1341857
MGI:1341859
MGI:1341865
MGI:1342005
MGI:1342273
MGI:1342292
MGI:1342307
MGI:1344347
MGI:1344361
MGI:1344363
MGI:1344408
MGI:1345147
MGI:1345192
MGI:1345963
MGI:1345966
MGI:1346006
MGI:1346072
MGI:1346093
MGI:1346346
MGI:1346500
MGI:1346869
MGI:1347050
MGI:1347054
MGI:1347060
MGI:1347085
MGI:1347343
MGI:1347347
MGI:1347351
MGI:1349163
MGI:1349165
MGI:1349400
MGI:1349414
MGI:1349415
MGI:1349419
MGI:1349439
MGI:1349450
MGI:1349453
MGI:1349455
MGI:1349475
MGI:1349635
MGI:1349919
MGI:1351332
MGI:1351352
MGI:1351614
MGI:1351636
MGI:1352499
MGI:1352507
MGI:1352745
MGI:1352758
MGI:1352759
MGI:1353428
MGI:1353450
MGI:1353494
MGI:1353498
MGI:1353574
MGI:1353598
MGI:1354165
MGI:1354170
MGI:1354704
MGI:1354730
MGI:1354734
MGI:1354742
MGI:1355274
MGI:1355323
MGI:1355335
MGI:1855693
MGI:1858216
MGI:1858271
MGI:1858416
MGI:1858751
MGI:1858752
MGI:1858964
MGI:1859252
MGI:1859270
MGI:1859682
MGI:1859730
MGI:1860078
MGI:1860188
MGI:1860276
MGI:1860283
MGI:1860417
MGI:1861305
MGI:1861380
MGI:1861457
MGI:1861728
MGI:1861729
MGI:1861901
MGI:1862037
MGI:1888669
MGI:1888971
MGI:1889006
MGI:1889507
MGI:1889595
MGI:1889850
MGI:1890156
MGI:1890165
MGI:1890218
MGI:1890602
MGI:1891112
MGI:1891189
MGI:1891654
MGI:1891693
MGI:1891704
MGI:1891731
MGI:1891766
MGI:1891808
MGI:1891833
MGI:1891917
MGI:1913208
MGI:1913277
MGI:1913304
MGI:1913310
MGI:1913325
MGI:1913348
MGI:1913355
MGI:1913412
MGI:1913443
MGI:1913444
MGI:1913451
MGI:1913560
MGI:1913564
MGI:1913635
MGI:1913661
MGI:1913663
MGI:1913677
MGI:1913695
MGI:1913697
MGI:1913719
MGI:1913758
MGI:1913764
MGI:1913775
MGI:1913780
MGI:1913789
MGI:1913819
MGI:1913856
MGI:1913865
MGI:1913869
MGI:1913876
MGI:1913894
MGI:1913913
MGI:1913922
MGI:1913932
MGI:1913941
MGI:1914099
MGI:1914152
MGI:1914167
MGI:1914172
MGI:1914208
MGI:1914248
MGI:1914285
MGI:1914293
MGI:1914297
MGI:1914309
MGI:1914356
MGI:1914367
MGI:1914401
MGI:1914451
MGI:1914461
MGI:1914490
MGI:1914497
MGI:1914523
MGI:1914544
MGI:1914556
MGI:1914634
MGI:1914662
MGI:1914679
MGI:1914703
MGI:1914731
MGI:1914811
MGI:1914915
MGI:1914925
MGI:1914928
MGI:1914933
MGI:1915013
MGI:1915026
MGI:1915040
MGI:1915054
MGI:1915059
MGI:1915062
MGI:1915087
MGI:1915089
MGI:1915091
MGI:1915107
MGI:1915120
MGI:1915131
MGI:1915148
MGI:1915201
MGI:1915205
MGI:1915207
MGI:1915221
MGI:1915223
MGI:1915224
MGI:1915345
MGI:1915350
MGI:1915416
MGI:1915453
MGI:1915467
MGI:1915472
MGI:1915512
MGI:1915587
MGI:1915592
MGI:1915625
MGI:1915921
MGI:1916017
MGI:1916106
MGI:1916125
MGI:1916295
MGI:1916366
MGI:1916372
MGI:1916428
MGI:1916452
MGI:1916672
MGI:1916679
MGI:1916824
MGI:1916882
MGI:1916947
MGI:1917030
MGI:1917057
MGI:1917173
MGI:1917244
MGI:1917275
MGI:1917332
MGI:1917343
MGI:1917431
MGI:1917446
MGI:1917473
MGI:1917474
MGI:1917498
MGI:1917505
MGI:1917544
MGI:1917592
MGI:1917599
MGI:1917600
MGI:1917606
MGI:1917629
MGI:1917631
MGI:1917656
MGI:1917665
MGI:1917670
MGI:1917818
MGI:1917822
MGI:1918084
MGI:1918128
MGI:1918161
MGI:1918215
MGI:1918224
MGI:1918348
MGI:1918685
MGI:1918724
MGI:1918779
MGI:1918882
MGI:1918944
MGI:1918993
MGI:1918995
MGI:1919014
MGI:1919030
MGI:1919085
MGI:1919205
MGI:1919224
MGI:1919267
MGI:1919292
MGI:1919315
MGI:1919331
MGI:1919420
MGI:1919439
MGI:1919449
MGI:1919455
MGI:1919488
MGI:1919592
MGI:1919599
MGI:1919619
MGI:1919654
MGI:1919732
MGI:1919802
MGI:1919840
MGI:1919850
MGI:1919936
MGI:1919972
MGI:1920009
MGI:1920078
MGI:1920149
MGI:1920150
MGI:1920196
MGI:1920198
MGI:1920297
MGI:1920352
MGI:1920393
MGI:1920538
MGI:1920635
MGI:1920692
MGI:1920994
MGI:1921241
MGI:1921270
MGI:1921353
MGI:1921375
MGI:1921393
MGI:1921416
MGI:1921435
MGI:1921437
MGI:1921455
MGI:1921494
MGI:1921502
MGI:1921506
MGI:1921590
MGI:1921620
MGI:1921633
MGI:1921688
MGI:1921771
MGI:1921807
MGI:1921846
MGI:1921866
MGI:1921991
MGI:1922083
MGI:1922151
MGI:1922246
MGI:1922434
MGI:1922665
MGI:1922704
MGI:1922832
MGI:1922857
MGI:1922858
MGI:1922909
MGI:1922919
MGI:1922925
MGI:1922984
MGI:1923012
MGI:1923020
MGI:1923036
MGI:1923144
MGI:1923164
MGI:1923241
MGI:1923330
MGI:1923406
MGI:1923480
MGI:1923488
MGI:1923520
MGI:1923749
MGI:1923760
MGI:1923809
MGI:1923827
MGI:1923831
MGI:1923864
MGI:1923957
MGI:1924074
MGI:1924182
MGI:1924237
MGI:1924288
MGI:1924399
MGI:1924462
MGI:1924486
MGI:1924504
MGI:1924621
MGI:1925004
MGI:1925031
MGI:1925230
MGI:1925482
MGI:1925589
MGI:1925860
MGI:1926078
MGI:1926080
MGI:1926116
MGI:1926187
MGI:1926211
MGI:1926784
MGI:1926834
MGI:1926884
MGI:1927133
MGI:1927136
MGI:1927244
MGI:1927489
MGI:1927550
MGI:1927551
MGI:1927578
MGI:1927654
MGI:1927868
MGI:1928323
MGI:1928376
MGI:1928484
MGI:1928741
MGI:1928744
MGI:1928745
MGI:1928760
MGI:1928896
MGI:1928898
MGI:1928900
MGI:1929095
MGI:1929100
MGI:1929212
MGI:1929214
MGI:1929260
MGI:1929261
MGI:1929266
MGI:1929282
MGI:1929289
MGI:1929467
MGI:1929492
MGI:1929494
MGI:1929668
MGI:1929705
MGI:1929772
MGI:1929898
MGI:1930140
MGI:1930187
MGI:1930849
MGI:1931050
MGI:1931123
MGI:1931834
MGI:1931882
MGI:1932075
MGI:1932139
MGI:1933131
MGI:1933159
MGI:1933185
MGI:1933947
MGI:1934031
MGI:1934234
MGI:1934835
MGI:1934858
MGI:2135601
MGI:2135610
MGI:2135625
MGI:2135637
MGI:2135752
MGI:2135960
MGI:2135965
MGI:2136459
MGI:2137681
MGI:2138261
MGI:2138605
MGI:2139593
MGI:2139793
MGI:2139806
MGI:2140712
MGI:2140967
MGI:2141180
MGI:2141867
MGI:2142346
MGI:2142527
MGI:2142534
MGI:2142747
MGI:2143652
MGI:2144013
MGI:2144151
MGI:2144243
MGI:2144726
MGI:2144727
MGI:2144805
MGI:2145304
MGI:2145637
MGI:2145977
MGI:2146030
MGI:2146885
MGI:2147598
MGI:2147616
MGI:2147627
MGI:2148896
MGI:2149820
MGI:2150150
MGI:2150302
MGI:2151064
MGI:2152214
MGI:2152414
MGI:2152453
MGI:2152936
MGI:2152938
MGI:2153183
MGI:2153887
MGI:2157521
MGI:2159437
MGI:2177151
MGI:2178563
MGI:2179326
MGI:2179432
MGI:2180560
MGI:2181074
MGI:2182061
MGI:2183442
MGI:2183683
MGI:2384159
MGI:2384297
MGI:2384407
MGI:2384590
MGI:2384801
MGI:2384812
MGI:2384838
MGI:2384849
MGI:2384902
MGI:2384993
MGI:2385017
MGI:2385070
MGI:2385071
MGI:2385163
MGI:2385184
MGI:2385336
MGI:2385758
MGI:2385848
MGI:2385896
MGI:2385920
MGI:2387178
MGI:2387603
MGI:2387638
MGI:2387661
MGI:2388479
MGI:2388640
MGI:2429763
MGI:2441697
MGI:2441758
MGI:2442032
MGI:2442040
MGI:2442230
MGI:2442356
MGI:2442409
MGI:2442454
MGI:2442479
MGI:2442511
MGI:2442633
MGI:2442722
MGI:2442752
MGI:2442988
MGI:2443030
MGI:2443036
MGI:2443086
MGI:2443135
MGI:2443223
MGI:2443245
MGI:2443267
MGI:2443281
MGI:2443304
MGI:2443306
MGI:2443554
MGI:2443731
MGI:2443764
MGI:2443793
MGI:2443807
MGI:2443880
MGI:2443884
MGI:2443895
MGI:2444022
MGI:2444096
MGI:2444173
MGI:2444207
MGI:2444263
MGI:2444266
MGI:2444283
MGI:2444531
MGI:2444615
MGI:2444847
MGI:2444851
MGI:2444926
MGI:2445001
MGI:2445069
MGI:2445087
MGI:2445089
MGI:2446107
MGI:2446180
MGI:2446242
MGI:2447670
MGI:2448488
MGI:2448496
MGI:2448506
MGI:2448526
MGI:2448536
MGI:2448573
MGI:2448730
MGI:2449057
MGI:2449088
MGI:2652875
MGI:2654325
MGI:2656842
MGI:2659071
MGI:2663511
MGI:2664902
MGI:2667176
MGI:2677270
MGI:2681523
MGI:2684789
MGI:2685365
MGI:2685431
MGI:2685790
MGI:2685817
MGI:2685946
MGI:2686414
MGI:3028623
MGI:3036242
MGI:3039591
MGI:3040688
MGI:3042273
MGI:3043381
MGI:3044681
MGI:3608416
MGI:3705243
MGI:87881
MGI:87929
MGI:87948
MGI:87977
MGI:87994
MGI:88016
MGI:88025
MGI:88026
MGI:88031
MGI:88039
MGI:88041
MGI:88065
MGI:88090
MGI:88108
MGI:88110
MGI:88190
MGI:88251
MGI:88259
MGI:88264
MGI:88279
MGI:88284
MGI:88407
MGI:88455
MGI:88537
MGI:88543
MGI:893579
MGI:894284
MGI:894318
MGI:894320
MGI:894652
MGI:894681
MGI:92356
MGI:94876
MGI:94893
MGI:95393
MGI:95394
MGI:95414
MGI:95421
MGI:95485
MGI:95515
MGI:95588
MGI:95654
MGI:95675
MGI:95752
MGI:95764
MGI:95766
MGI:95768
MGI:95775
MGI:95780
MGI:95784
MGI:95797
MGI:95805
MGI:95871
MGI:95908
MGI:96103
MGI:96217
MGI:96243
MGI:96247
MGI:96269
MGI:96414
MGI:96617
MGI:96663
MGI:96759
MGI:96763
MGI:96836
MGI:96904
MGI:96915
MGI:96916
MGI:96957
MGI:96982
MGI:97075
MGI:97178
MGI:97180
MGI:97386
MGI:97447
MGI:97502
MGI:97523
MGI:97552
MGI:97553
MGI:97555
MGI:97591
MGI:97594
MGI:97744
MGI:97749
MGI:97775
MGI:97828
MGI:97829
MGI:97831
MGI:97844
MGI:97851
MGI:98241
MGI:98419
MGI:98535
MGI:98735
MGI:98797
MGI:98858
MGI:98890
MGI:99432
MGI:99434
MGI:99436
MGI:99441
MGI:99476
MGI:99511
MGI:99517
MGI:99537
MGI:99555
MGI:99595
MGI:99670
MGI:99675
MGI:99778
MGI:99878
MGI:99887
MGI:99954

## Sheet: GeneMapping
query	entrezgene	name	symbol	alias	taxid	MGI
KIAA0513	234797	RIKEN cDNA 6430548M08 gene	6430548M08Rik	AW049007, Kiaa0513, mKIAA0513	10090	MGI:2443793
BLES03	107242	expressed sequence AI837181	AI837181	Bles03, N28173	10090	MGI:2147598
AATK	11302	apoptosis-associated tyrosine kinase	Aatk	AATY, AATYK, aatyk1, mKIAA0641	10090	MGI:1197518
ABCB9	56325	ATP-binding cassette, sub-family B (MDR/TAP), member 9	Abcb9	T, TAPL, mKIAA1520	10090	MGI:1861729
ABHD16A	193742	abhydrolase domain containing 16A	Abhd16a	AI326074, Bat, Bat-5, Bat5, D17H6S82	10090	MGI:99476
ABI2	329165	abl interactor 2	Abi2	8430425M24Rik, AI839867, AblBP3, ArgBP1, C130078H13	10090	MGI:106913
ABLIM1	226251	actin-binding LIM protein 1	Ablim1	2210411C18Rik, 2610209L21Rik, 4833406P10Rik, 9330196J19Rik, AV079770	10090	MGI:1194500
ABLIM2	231148	actin-binding LIM protein 2	Ablim2	AI606905, C230091L11	10090	MGI:2385758
ABLIM3	319713	actin binding LIM protein family, member 3	Ablim3	AW990719, D930036B08Rik	10090	MGI:2442582
ABR	109934	active BCR-related gene	Abr		10090	MGI:107771
ABRAXAS2	109359	BRISC complex subunit	Abraxas2	AA589499, AI853413, Abro1, C430003P19Rik, Fam175	10090	MGI:1926116
ACBD3	170760	acyl-Coenzyme A binding domain containing 3	Acbd3	60kDa, 8430407O11Rik, D1Ertd10, D1Ertd10e, GCP60	10090	MGI:2181074
ACBD6	72482	acyl-Coenzyme A binding domain containing 6	Acbd6	0610010G04Rik, 2610100E10Rik	10090	MGI:1919732
ACHE	11423	acetylcholinesterase	Ache		10090	MGI:87876
ACLY	104112	ATP citrate lyase	Acly	A730098H14Rik, AW538652	10090	MGI:103251
ACOT7	70025	acyl-CoA thioesterase 7	Acot7	2410041A17Rik, AU01471, Ach1, Act, Bac	10090	MGI:1917275
ACP1	11431	acid phosphatase 1, soluble	Acp1	4632432E04Rik, AI427468, Acp, Acp-1, LMW-	10090	MGI:87881
ACSL3	74205	acyl-CoA synthetase long-chain family member 3	Acsl3	2610510B12Rik, Acs3, C85929, Facl3, LACS 3	10090	MGI:1921455
ACTB	11461	actin, beta	Actb	Act, Actx, E430023M04Rik, beta-a, beta-actin	10090	MGI:87904
ACTG1	11465	actin, gamma, cytoplasmic 1	Actg1	AL023024, Ac, Actg, Actl, E51	10090	MGI:87906
ACTN1	109711	actinin, alpha 1	Actn1	3110023F10Rik, Actn1a	10090	MGI:2137706
ACTR10	56444	ARP10 actin-related protein 10	Actr10	Actr11, Ar, Arp11	10090	MGI:1891654
ACTR1A	54130	ARP1 actin-related protein 1A, centractin alpha	Actr1a	Arp1, actin-RPV, alpha-Arp1	10090	MGI:1858964
ACTR1B	226977	ARP1 actin-related protein 1B, centractin beta	Actr1b	2310066K23Rik, AA960180, AI851923, Ar, Arp1b	10090	MGI:1917446
ACTR2	66713	ARP2 actin-related protein 2	Actr2	4921510D23Rik, A, AA409782, Arp2, D6Ertd746	10090	MGI:1913963
ADAL	75894	adenosine deaminase-like	Adal	4930578F03Rik	10090	MGI:1923144
ADAM22	11496	a disintegrin and metallopeptidase domain 22	Adam22	2900022I03Rik, AI854032, MDC2	10090	MGI:1340046
ADCY1	432530	adenylate cyclase 1	Adcy1	AC, AC1, D11Bwg1392e, I-, I-AC	10090	MGI:99677
ADCY3	104111	adenylate cyclase 3	Adcy3	A, AC, AC3, ACIII, mKIAA0511	10090	MGI:99675
ADCY9	11515	adenylate cyclase 9	Adcy9	AC9, ACtp, ACtp10, AW125421, D16Wsu65	10090	MGI:108450
ADD1	11518	adducin 1 (alpha)	Add1	AI256389	10090	MGI:87918
ADD2	11519	adducin 2 (beta)	Add2	2900072M03Rik, add97	10090	MGI:87919
ADD3	27360	adducin 3 (gamma)	Add3	AI463285, R75380	10090	MGI:1351615
ADGRL1	330814	adhesion G protein-coupled receptor L1	Adgrl1	2900070I05Rik, AI182398, CLIBA, Lec, Lec2	10090	MGI:1929461
ADH5	11532	alcohol dehydrogenase 5 (class III), chi polypeptide	Adh5	Adh, Adh-, Adh-5, Adh3, G	10090	MGI:87929
ADPRH	11544	ADP-ribosylarginine hydrolase	Adprh	Ar, Arh1	10090	MGI:1098234
ADRM1	56436	adhesion regulating molecule 1	Adrm1	1110063P18Rik, 2510006J17Rik, AA408205, ARM, ARM-1	10090	MGI:1929289
ADSL	11564	adenylosuccinate lyase	Adsl	Adl, Asl	10090	MGI:103202
ADSS2	11566	adenylosuccinate synthetase, non muscle	Adss	AI314886, AS, Adss2	10090	MGI:87948
AFDN	17356	afadin, adherens junction formation factor	Afdn	5033403D15Rik, AF, AF6, Af-6, Afadin	10090	MGI:1314653
AFTPH	216549	aftiphilin	Aftph		10090	MGI:1923012
AGAP2	216439	ArfGAP with GTPase domain, ankyrin repeat and PH domain 2	Agap2	AGAP-2, Centg, Centg1, PIKE, cnt-g1	10090	MGI:3580016
AGAP3	213990	ArfGAP with GTPase domain, ankyrin repeat and PH domain 3	Agap3	AGAP-3, AV028425, Centg, Centg3, Cr	10090	MGI:2183446
AGFG1	15463	ArfGAP with FG repeats 1	Agfg1	AU045498, C130049H11Rik, C85612, D730048C23Rik, Hr	10090	MGI:1333754
AGFG2	231801	ArfGAP with FG repeats 2	Agfg2	A630095P14Rik, Hr, Hrbl, RAB-R, RABR	10090	MGI:2443267
AGK	69923	acylglycerol kinase	Agk	2610037M15Rik, 6720408I04Rik, AI465370, MuL, Mulk	10090	MGI:1917173
AGPAT1	55979	1-acylglycerol-3-phosphate O-acyltransferase 1 (lysophosphatidic acid acyltransferase, alpha)	Agpat1	1-A, 1-AGP, 1-AGPAT, AW047140, Lpa	10090	MGI:1932075
AGPAT4	68262	1-acylglycerol-3-phosphate O-acyltransferase 4 (lysophosphatidic acid acyltransferase, delta)	Agpat4	1500003P24Rik	10090	MGI:1915512
AGTPBP1	67269	ATP/GTP binding protein 1	Agtpbp1	1700020N17Rik, 2310001G17Rik, 2900054O13Rik, 4930445M19Rik, 5730402G09Rik	10090	MGI:2159437
AHCYL1	229709	S-adenosylhomocysteine hydrolase-like 1	Ahcyl1	1110034F20Rik, AA409031, AA414901, Ahcy-, Ahcy-rs3	10090	MGI:2385184
AHCYL2	74340	S-adenosylhomocysteine hydrolase-like 2	Ahcyl2	4631427C17Rik, AI227036, Adohcyase3, mKIAA0828	10090	MGI:1921590
AHSA1	217737	AHA1, activator of heat shock protein ATPase 1	Ahsa1	Ah, BC023857, p3, p38	10090	MGI:2387603
AIFM1	26926	apoptosis-inducing factor, mitochondrion-associated 1	Aifm1	A, AIF, AIFsh2, Hq, Pdcd	10090	MGI:1349419
AK1	11636	adenylate kinase 1	Ak1	Ak-, Ak-1, B430205N08Rik	10090	MGI:87977
AKAP10	56697	A kinase (PRKA) anchor protein 10	Akap10	1500031L16Rik, B130049N18Rik, D-AK, D-AKAP-2, D-AKAP2	10090	MGI:1890218
AKAP12	83397	A kinase (PRKA) anchor protein (gravin) 12	Akap12	AI317366, SSe, SSeCKS, Sr, Srcs5	10090	MGI:1932576
AKR1A1	58810	aldo-keto reductase family 1, member A1 (aldehyde reductase)	Akr1a1	2610201A18Rik, Akr, Akr1a4	10090	MGI:1929955
AKR1B1	11677	aldo-keto reductase family 1, member B3 (aldose reductase)	Akr1b3	A, ALR2, AR, Ah, Ahr	10090	MGI:1353494
AKT3	23797	thymoma viral proto-oncogene 3	Akt3	AI851531, D930002M15Rik, Nmf35, Nmf350	10090	MGI:1345147
ALDH1A1	11668	aldehyde dehydrogenase family 1, subfamily A1	Aldh1a1	ALD, ALDH-E1, ALHDII, Ahd, Ahd-	10090	MGI:1353450
ALDH1A7	26358	aldehyde dehydrogenase family 1, subfamily A7	Aldh1a7	AI987940, Ahd2-l, Ahd2-like, Aldh, Aldh-pb	10090	MGI:1347050
ALDOA	11674	aldolase A, fructose-bisphosphate	Aldoa	Al, Ald, Aldo-1, Aldo1	10090	MGI:87994
ALG2	56737	asparagine-linked glycosylation 2 (alpha-1,3-mannosyltransferase)	Alg2	1110018A23Rik, 1300013N08Rik, AL, ALPG2, CDG	10090	MGI:1914731
AMPD2	109674	adenosine monophosphate deaminase 2	Ampd2	1200014F01Rik, AI552571, Ampd, Ampd-2, m4521Da	10090	MGI:88016
AMPH	218038	amphiphysin	Amph		10090	MGI:103574
ANK2	109676	ankyrin 2, brain	Ank2	100043364, AI835472, AW491075, Ank, Ank-2	10090	MGI:88025
ANK3	11735	ankyrin 3, epithelial	Ank3	2900054D09Rik, AI314020, An, Ank, Ank-3	10090	MGI:88026
ANKRD34B	218440	ankyrin repeat domain 34B	Ankrd34b	6430502M16Rik, DP58	10090	MGI:2443245
ANKS1A	224650	ankyrin repeat and SAM domain containing 1	Anks1	Anks1a, O, mKIAA0229	10090	MGI:2446180
ANKS1B	77531	ankyrin repeat and sterile alpha motif domain containing 1B	Anks1b	AIDA, AIDA-1, AIDA-1b, C030032C09Rik, E530015N03Rik	10090	MGI:1924781
ANXA7	11750	annexin A7	Anxa7	AI265384, AI316497, An, Anx7, syn	10090	MGI:88031
AP1B1	11764	adaptor protein complex AP-1, beta 1 subunit	Ap1b1	Adtb, Adtb1, b2b1660C, b2b1660Clo	10090	MGI:1096368
AP1G1	11765	adaptor protein complex AP-1, gamma 1 subunit	Ap1g1	AA409002, AU041323, AW551707, Adt, Adtg	10090	MGI:101919
AP1M1	11767	adaptor-related protein complex AP-1, mu subunit 1	Ap1m1	AA408894, AP, AP47, Adtm, Adtm1A	10090	MGI:102776
AP2A1	11771	adaptor-related protein complex 2, alpha 1 subunit	Ap2a1	Ad, Adtaa	10090	MGI:101921
AP2A2	11772	adaptor-related protein complex 2, alpha 2 subunit	Ap2a2	2410074K14Rik, AF006990, AW146353, Adt, Adtab	10090	MGI:101920
AP2B1	71770	adaptor-related protein complex 2, beta 1 subunit	Ap2b1	1300012O03Rik, AI788979, AP105B	10090	MGI:1919020
AP2M1	11773	adaptor-related protein complex 2, mu 1 subunit	Ap2m1		10090	MGI:1298405
AP3B2	11775	adaptor-related protein complex 3, beta 2 subunit	Ap3b2	AI549966, AU042881, Na, Naptb, [b]-NAP	10090	MGI:1100869
AP3D1	11776	adaptor-related protein complex 3, delta 1 subunit	Ap3d1	AA407035, Ap3d, B, Bolvr, mBL	10090	MGI:107734
AP3M1	55946	adaptor-related protein complex 3, mu 1 subunit	Ap3m1	1200013D09Rik, C78982, R75378	10090	MGI:1929212
AP3M2	64933	adaptor-related protein complex 3, mu 2 subunit	Ap3m2	5830445E16Rik, AP-, AP-3B	10090	MGI:1929214
APBA1	319924	amyloid beta (A4) precursor protein binding, family A, member 1	Apba1	6430513E09Rik, Lin, Lin-10, Mi, Min	10090	MGI:1860297
APBA2	11784	amyloid beta (A4) precursor protein-binding, family A, member 2	Apba2	X11, X11-li, X11-like, X11L, XllL	10090	MGI:1261791
APBB1	11785	amyloid beta (A4) precursor protein-binding, family B, member 1	Apbb1	Fe65, Rir	10090	MGI:107765
APC	11789	APC, WNT signaling pathway regulator	Apc	AI047805, AU020952, AW124434, CC1, M	10090	MGI:88039
APEH	235606	acylpeptide hydrolase	Apeh		10090	MGI:88041
APPL1	72993	adaptor protein, phosphotyrosine interaction, PH domain and leucine zipper containing 1	Appl1	2900057D21Rik, 7330406P05Rik, AI585782, AW209077, BB022931	10090	MGI:1920243
ARAF	11836	Araf proto-oncogene, serine/threonine kinase	Araf	1200013E08Rik, A-, A-Raf, AW495444, Ar	10090	MGI:88065
ARF2	11841	ADP-ribosylation factor 2	Arf2		10090	MGI:99595
ARF3	11842	ADP-ribosylation factor 3	Arf3	5430400P17Rik, AI854770	10090	MGI:99432
ARF4	11843	ADP-ribosylation factor 4	Arf4	AA407803	10090	MGI:99433
ARF5	11844	ADP-ribosylation factor 5	Arf5		10090	MGI:99434
ARF6	11845	ADP-ribosylation factor 6	Arf6	AI788669, AW496366	10090	MGI:99435
ARFGAP1	228998	ADP-ribosylation factor GTPase activating protein 1	Arfgap1	AI115377, Arf1gap	10090	MGI:2183559
ARFGAP2	77038	ADP-ribosylation factor GTPase activating protein 2	Arfgap2	2310032E02Rik, Zfp28, Zfp289	10090	MGI:1924288
ARFGAP3	66251	ADP-ribosylation factor GTPase activating protein 3	Arfgap3	0610009H19Rik, 1810004P07Rik, 1810035F16Rik, 9130416J18Rik, Arfgap1	10090	MGI:1913501
ARFGEF1	211673	ADP-ribosylation factor guanine nucleotide-exchange factor 1(brefeldin A-inhibited)	Arfgef1	ARFG, ARFGEP1, BIG, BIG1, D130059B05Rik	10090	MGI:2442988
ARFGEF3	215821	ARFGEF family member 3	Arfgef3	9630004D11, B930094H20Rik, BIG, BIG3, D10Bwg1379e	10090	MGI:106387
ARFIP2	76932	ADP-ribosylation factor interacting protein 2	Arfip2	2310002N04Rik, POR, Por1	10090	MGI:1924182
ARHGAP12	75415	Rho GTPase activating protein 12	Arhgap12	2810011M08Rik	10090	MGI:1922665
ARHGAP21	71435	Rho GTPase activating protein 21	Arhgap21	5530401C11Rik, AA416458, ARHG, ARHGAP10	10090	MGI:1918685
ARHGAP35	232906	Rho GTPase activating protein 35	Arhgap35	6430596G11Rik, AI841135, Grl, Grlf1, mKIAA1722	10090	MGI:1929494
ARHGAP5	11855	Rho GTPase activating protein 5	Arhgap5	p190, p190-, p190-B, p190B	10090	MGI:1332637
ARHGAP6	11856	Rho GTPase activating protein 6	Arhgap6	AI504284, RhoGA, RhoGAPX-1	10090	MGI:1196332
ARHGEF12	69632	Rho guanine nucleotide exchange factor (GEF) 12	Arhgef12	2310014B11Rik, AU019857, L, Larg, mKIAA0382	10090	MGI:1916882
ARHGEF9	236915	CDC42 guanine nucleotide exchange factor (GEF) 9	Arhgef9	9630036L12Rik, coll	10090	MGI:2442233
ARIH1	23806	ariadne RBR E3 ubiquitin protein ligase 1	Arih1	AU021774, Ari, Ari1, Hari, Hhari	10090	MGI:1344363
ARIH2	23807	ariadne RBR E3 ubiquitin protein ligase 2	Arih2	AI843547, ARI2, TRI, TRIAD1, UIP48	10090	MGI:1344361
ARL1	104303	ADP-ribosylation factor-like 1	Arl1	2310008D22Rik, AU019749	10090	MGI:99436
ARL6	56297	ADP-ribosylation factor-like 6	Arl6	1110018H24Rik, 2210411E14Rik, BBS, BBS3	10090	MGI:1927136
ARL8B	67166	ADP-ribosylation factor-like 8B	Arl8b	2610313E07Rik, 3100002J04Rik, Arl, Arl10c, gie1	10090	MGI:1914416
ARMC1	74252	armadillo repeat containing 1	Armc1	2310016N05Rik, 2900046P06Rik, 3110009G21Rik, A, AA409258	10090	MGI:1921502
ARMC10	67211	armadillo repeat containing 10	Armc10	2810037C14Rik, Svh	10090	MGI:1914461
ARMC8	74125	armadillo repeat containing 8	Armc8	1200015K23Rik, Gid, Gid5, HSPC0, HSPC056	10090	MGI:1921375
ARPC1A	56443	actin related protein 2/3 complex, subunit 1A	Arpc1a	0610010H08Rik, 1110030K07Rik, 41kDa, AA407347, Sid	10090	MGI:1928896
ARPC5L	74192	actin related protein 2/3 complex, subunit 5-like	Arpc5l	2010015J01Rik, AI852867, ARC16, ARC16-2, AW555592	10090	MGI:1921442
ARPIN	70420	actin-related protein 2/3 complex inhibitor	Arpin	2610034B18Rik	10090	MGI:1917670
ASAP1	13196	ArfGAP with SH3 domain, ankyrin repeat and PH domain1	Asap1	AV239055, DEF-1, Ddef1, PAP, mKIAA1249	10090	MGI:1342335
ASRGL1	66514	asparaginase like 1	Asrgl1	2410004D18Rik, A, ALP, ALP1, AU040643	10090	MGI:1913764
ASS1	11898	argininosuccinate synthetase 1	Ass1	AA408052, ASS, As, Ass-1, fo	10090	MGI:88090
ASTN1	11899	astrotactin 1	Astn1	Astn, GC14, mKIAA0289	10090	MGI:1098567
ATAT1	73242	alpha tubulin acetyltransferase 1	Atat1	0610011P08Rik, 2610008K08Rik, 2610110G12Rik, 3110080J08Rik, MEC-17	10090	MGI:1913869
ATCAY	16467	ataxia, cerebellar, Cayman type	Atcay	3322401A10Rik, BB077577, BNI, BNIP-H, CLAC	10090	MGI:2448730
ATE1	11907	arginyltransferase 1	Ate1	AI225793, AW547406	10090	MGI:1333870
ATG2B	76559	autophagy related 2B	Atg2b	2410024A21Rik, AI047755, AI503411, AW558123, C030004M05Rik	10090	MGI:1923809
ATG3	67841	autophagy related 3	Atg3	2610016C12Rik, AP, APG3, Apg3l, Atg3l	10090	MGI:1915091
ATG4B	66615	autophagy related 4B, cysteine peptidase	Atg4b	2510009N07Rik, AW048066, Apg, Apg4b, Atg4bl	10090	MGI:1913865
ATG7	74244	autophagy related 7	Atg7	1810013K23Rik, Agp7, Ap, Apg7l, Atg7l	10090	MGI:1921494
ATIC	108147	5-aminoimidazole-4-carboxamide ribonucleotide formyltransferase/IMP cyclohydrolase	Atic	2610509C24Rik, AA536954, AW212393	10090	MGI:1351352
ATL1	73991	atlastin GTPase 1	Atl1	4930435M24Rik, AD-, Adfsp, FS, Fsp1	10090	MGI:1921241
ATL2	56298	atlastin GTPase 2	Atl2	2010110I21Rik, AA407293, AV334690, Ai, Aip-2	10090	MGI:1929492
ATP1A3	232975	ATPase, Na+/K+ transporting, alpha 3 polypeptide	Atp1a3	Atp, Atpa-2	10090	MGI:88107
ATP1B1	11931	ATPase, Na+/K+ transporting, beta 1 polypeptide	Atp1b1	At, Atp4b, Atpb, Atpb-1, NKbeta1	10090	MGI:88108
ATP2A2	11938	ATPase, Ca++ transporting, cardiac muscle, slow twitch 2	Atp2a2	9530097L16Rik, D5Wsu150, D5Wsu150e, SER, SERC	10090	MGI:88110
ATP2B2	11941	ATPase, Ca++ transporting, plasma membrane 2	Atp2b2	D6Abb2, D6Abb2e, Gena3, Gena300, PMC	10090	MGI:105368
ATP2B4	381290	ATPase, Ca++ transporting, plasma membrane 4	Atp2b4	PMC, Pmca4	10090	MGI:88111
ATP5PF	11957	ATP synthase, H+ transporting, mitochondrial F0 complex, subunit F	Atp5j	Atp5pf, CF6	10090	MGI:107777
ATP6V0A1	11975	ATPase, H+ transporting, lysosomal V0 subunit A1	Atp6v0a1	AA959968, ATP6a1, Atp, Atp6n1, Atp6n1a	10090	MGI:103286
ATP6V0D1	11972	ATPase, H+ transporting, lysosomal V0 subunit D1	Atp6v0d1	AI267038, Ac3, Ac39, Atp, Atp6d	10090	MGI:1201778
ATP6V1A	11964	ATPase, H+ transporting, lysosomal V1 subunit A	Atp6v1a	AI647066, Atp, Atp6a1, Atp6a2, Atp6v1a1	10090	MGI:1201780
ATP6V1B2	11966	ATPase, H+ transporting, lysosomal V1 subunit B2	Atp6v1b2	AI194269, AI790362, Atp6, Atp6b2, HO5	10090	MGI:109618
ATP6V1D	73834	ATPase, H+ transporting, lysosomal V1 subunit D	Atp6v1d	1110004P10Rik, Atp, Atp6m, VA, VATD	10090	MGI:1921084
ATP6V1E1	11973	ATPase, H+ transporting, lysosomal V1 subunit E1	Atp6v1e1	2410029D23Rik, Atp, Atp6, Atp6e, Atp6e2	10090	MGI:894326
ATP6V1F	66144	ATPase, H+ transporting, lysosomal V1 subunit F	Atp6v1f	1110004G16Rik	10090	MGI:1913394
ATP6V1G2	66237	ATPase, H+ transporting, lysosomal V1 subunit G2	Atp6v1g2	1500002D01Rik, Atp6, Atp6g2, NG3, NG38	10090	MGI:1913487
ATP6V1H	108664	ATPase, H+ transporting, lysosomal V1 subunit H	Atp6v1h	0710001F19Rik, AU022349, CGI-11, SFD, SFDalpha	10090	MGI:1914864
ATP9A	11981	ATPase, class II, type 9A	Atp9a	IIa	10090	MGI:1330826
ATPAF1	230649	ATP synthase mitochondrial F1 complex assembly factor 1	Atpaf1	6330547J17Rik, AI593252, ATP, ATP11, ATP11p	10090	MGI:2180560
ATXN2	20239	ataxin 2	Atxn2	9630045M23Rik, ATX, ATX2, AW544490, Sc	10090	MGI:1277223
ATXN2L	233871	ataxin 2-like	Atxn2l	A, A2, A2D, A2LG, A2RP	10090	MGI:2446242
AVL9	78937	AVL9 cell migration associated	Avl9	5830411G16Rik, D730049P16Rik, mKIAA0241	10090	MGI:1926187
AZI2	27215	5-azacytidine induced gene 2	Azi2	AA410145, AZ, AZ2	10090	MGI:1351332
BAG4	67384	BCL2-associated athanogene 4	Bag4	2410112I15Rik, SODD	10090	MGI:1914634
BAG6	224727	BCL2-associated athanogene 6	Bag6	2410045D21Rik, AA408914, BAG-6, Bat, Bat3	10090	MGI:1919439
BASP1	70350	brain abundant, membrane attached signal protein 1	Basp1	2610024P12Rik, CAP, CAP-, CAP-23, CAP23	10090	MGI:1917600
BCAR1	12927	breast cancer anti-estrogen resistance 1	Bcar1	AI385681, C, Cas, Cr, Crkas	10090	MGI:108091
BCAS3	192197	BCAS3 microtubule associated cell migration factor	Bcas3	1500019F07Rik, 2610028P08Rik, AU021018, BC028339, K20D4	10090	MGI:2385848
BCAT1	12035	branched chain aminotransferase 1, cytosolic	Bcat1	BCAT, BCATc, Bcat-, Eca3, Eca39	10090	MGI:104861
BCR	110279	BCR activator of RhoGEF and GTPase	Bcr	5133400C09Rik, AI561783, AI853148, mKIAA3017	10090	MGI:88141
BEGAIN	380785	brain-enriched guanylate kinase-associated	Begain	BM948371, Gm897	10090	MGI:3044626
BIN1	30948	bridging integrator 1	Bin1	ALP-1, Am, Amphl, BRAMP-2, SH3P9	10090	MGI:108092
BMPR2	12168	bone morphogenetic protein receptor, type II (serine/threonine kinase)	Bmpr2	2610024H22Rik, AL117858, AW546137, BB189135, BM	10090	MGI:1095407
BOLA2	66162	bolA-like 2 (E. coli)	Bola2	1110025L05Rik, BolA-2	10090	MGI:1913412
BPNT1	23827	3'(2'), 5'-bisphosphate nucleotidase 1	Bpnt1	BPn, BPntase	10090	MGI:1338800
BRAF	109880	Braf transforming gene	Braf	9930012E13Rik, AA120551, AA387315, AA473386, B-raf	10090	MGI:88190
BRSK1	381979	BR serine/threonine kinase 1	Brsk1	Gm1100, SAD, SAD-B, SADB	10090	MGI:2685946
BRSK2	75770	BR serine/threonine kinase 2	Brsk2	4833424K13Rik, SA, SAD-A, SADA	10090	MGI:1923020
BSN	12217	bassoon	Bsn		10090	MGI:1277955
C2CD2L	71764	C2 calcium-dependent domain containing 2-like	C2cd2l	1300006O23Rik, Tmem24	10090	MGI:1919014
C2CD5	74741	C2 calcium-dependent domain containing 5	C2cd5	5730419I09Rik, C030008B15Rik, CDP13, CDP138	10090	MGI:1921991
CAB39	12283	calcium binding protein 39	Cab39	39kD, AA408805, AA960512, C78372, MO25	10090	MGI:107438
CACNA1A	12286	calcium channel, voltage-dependent, P/Q type, alpha 1A subunit	Cacna1a	APCA, BI, Caca1a, Cacn, Cacnl1a4	10090	MGI:109482
CACNA1B	12287	calcium channel, voltage-dependent, N type, alpha 1B subunit	Cacna1b	AW050276, AW060892, AW822256, BIII, Cav2	10090	MGI:88296
CACNA1E	12290	calcium channel, voltage-dependent, R type, alpha 1E subunit	Cacna1e	A430040I15, BII, Cach6, Cacnl1a6, Cav2	10090	MGI:106217
CACNA2D1	12293	calcium channel, voltage-dependent, alpha2/delta subunit 1	Cacna2d1	Ca(v)alpha2delta1, Cac, Cacna2, Cchl, Cchl2a	10090	MGI:88295
CACNB1	12295	calcium channel, voltage-dependent, beta 1 subunit	Cacnb1	CAB1, Cchb1, Cchlb, Cchlb1	10090	MGI:102522
CACNB2	12296	calcium channel, voltage-dependent, beta 2 subunit	Cacnb2	AW060387, CAB2, Cavbe, Cavbeta2, Cchb2	10090	MGI:894644
CACNB3	12297	calcium channel, voltage-dependent, beta 3 subunit	Cacnb3	Beta3, CAB3, Ca(v)beta3, Cchb3	10090	MGI:103307
CACNB4	12298	calcium channel, voltage-dependent, beta 4 subunit	Cacnb4	3110038O15Rik, Cchb4, lh	10090	MGI:103301
CACYBP	12301	calcyclin binding protein	Cacybp	SIP	10090	MGI:1270839
CADM1	54725	cell adhesion molecule 1	Cadm1	2900073G06Rik, 3100001I08Rik, AI987920, Bl2, Igs	10090	MGI:1889272
CADM2	239857	cell adhesion molecule 2	Cadm2	2900078E11Rik, 9330131D06, A830029E02Rik, Igdf4d, Igsf	10090	MGI:2442722
CADM3	94332	cell adhesion molecule 3	Cadm3	BI, BIgR, Igsf, Igsf4b, Nec	10090	MGI:2137858
CADM4	260299	cell adhesion molecule 4	Cadm4	Igdf4c, Igsf, Igsf4c, Necl, Ts	10090	MGI:2449088
CADPS	27062	Ca2+-dependent secretion activator	Cadps	AU067781, CA, CAPS, CAPS1, mKIAA1121	10090	MGI:1350922
CADPS2	320405	Ca2+-dependent activator protein for secretion 2	Cadps2	A230044C21Rik, Ca, Caps-2, Caps2, Cpd2	10090	MGI:2443963
CALB1	12307	calbindin 1	Calb1	Bra, Brain-2, CB, Ca, Calb	10090	MGI:88248
CALB2	12308	calbindin 2	Calb2	C, CR, cal	10090	MGI:101914
CALM1	12313	calmodulin 1	Calm1	AI256814, AI327027, AI461935, AL024000, CaM	10090	MGI:88251
CAMK1	52163	calcium/calmodulin-dependent protein kinase I	Camk1	AI505105, CaMKIalpha, Cam, Camk, D6Ertd263	10090	MGI:1098535
CAMK2A	12322	calcium/calmodulin-dependent protein kinase II alpha	Camk2a	CaMKII, R74975, mKIAA0968	10090	MGI:88256
CAMK2B	12323	calcium/calmodulin-dependent protein kinase II, beta	Camk2b	CaMKII	10090	MGI:88257
CAMK2D	108058	calcium/calmodulin-dependent protein kinase II, delta	Camk2d	2810011D23Rik, 8030469K03Rik, CaMK II, [d]-CaMKII	10090	MGI:1341265
CAMK2G	12325	calcium/calmodulin-dependent protein kinase II gamma	Camk2g	Camk, Camkg	10090	MGI:88259
CAMK2N2	73047	calcium/calmodulin-dependent protein kinase II inhibitor 2	Camk2n2	2900075A18Rik	10090	MGI:1920297
CAMK4	12326	calcium/calmodulin-dependent protein kinase IV	Camk4	A430110E23Rik, AI666733, CaM, CaMKI, CaMKIV	10090	MGI:88258
CAMKK1	55984	calcium/calmodulin-dependent protein kinase kinase 1, alpha	Camkk1	AI846603, CaMKKalpha, Camkk, caM-KK 1, caM-KK alpha	10090	MGI:1891766
CAMSAP1	227634	calmodulin regulated spectrin-associated protein 1	Camsap1	9530003A05Rik, C77823, PRO2, PRO2405	10090	MGI:3036242
CAMSAP2	67886	calmodulin regulated spectrin-associated protein family, member 2	Camsap2	1600013L13Rik, 4930541M15Rik, Cams, Camsap1l1, mKIAA1078	10090	MGI:1922434
CAMSAP3	69697	calmodulin regulated spectrin-associated protein family, member 3	Camsap3	2310057J16Rik, Kiaa1543, Nez, Nezha	10090	MGI:1916947
CAND1	71902	cullin associated and neddylation disassociated 1	Cand1	2310038O07Rik, 6330512O03Rik, AI195005, AI846556, D10Ertd516	10090	MGI:1261820
CAP2	67252	CAP, adenylate cyclase-associated protein, 2 (yeast)	Cap2	2810452G09Rik, AV045235	10090	MGI:1914502
CAPN2	12334	calpain 2	Capn2	AI326419, CALP80, Ca, Cap, Capa-2	10090	MGI:88264
CAPZB	12345	capping protein (actin filament) muscle Z-line, beta	Capzb	1700120C01Rik, AI325129, CPB, CPB1, CPB2	10090	MGI:104652
CARM1	59035	coactivator-associated arginine methyltransferase 1	Carm1	Prm, Prmt4	10090	MGI:1913208
CARMIL2	234695	capping protein regulator and myosin 1 linker 2	Carmil2	CG1399-PB, D130029J02Rik, Gm585, R, Rltpr	10090	MGI:2685431
CARMIL3	268747	capping protein regulator and myosin 1 linker 3	Carmil3	Lrrc, Lrrc16b, mFLJ00240	10090	MGI:2448573
CASKIN1	268932	CASK interacting protein 1	Caskin1	3300002N10Rik, C130061I24, C630036E02Rik, mKIAA1306	10090	MGI:2442952
CAST	12380	calpastatin	Cast		10090	MGI:1098236
CBARP	100503659	calcium channel, voltage-dependent, beta subunit associated regulatory protein	Cbarp	9630008F14, D, Dos, R29144/, R29144/1	10090	MGI:1354170
CBL	12402	Casitas B-lineage lymphoma	Cbl	4732447J05Rik, Cbl-, Cbl-2, c-Cb, c-Cbl	10090	MGI:88279
CBR1	12408	carbonyl reductase 1	Cbr1	AW261796, C, CR, Cbr, PG-9-KR	10090	MGI:88284
CCDC136	232664	coiled-coil domain containing 136	Ccdc136	4921511K06Rik, BC006583	10090	MGI:1918128
CCDC177	380768	coiled-coil domain containing 177	Ccdc177	Gm1568	10090	MGI:2686414
CCDC85A	216613	coiled-coil domain containing 85A	Ccdc85a		10090	MGI:2445069
CCDC92	215707	coiled-coil domain containing 92	Ccdc92	AW050178, D5Bwg0834e	10090	MGI:106485
CCNY	67974	cyclin Y	Ccny	1700025H17Rik, 3110050L10Rik, 4631402G10Rik, 5730405I09Rik	10090	MGI:1915224
CCT2	12461	chaperonin containing Tcp1, subunit 2 (beta)	Cct2	Cctb	10090	MGI:107186
CCT3	12462	chaperonin containing Tcp1, subunit 3 (gamma)	Cct3	AL024092, Cctg, Tcp1-, Tcp1-rs3, TriC	10090	MGI:104708
CCT5	12465	chaperonin containing Tcp1, subunit 5 (epsilon)	Cct5	CCT-epsilon, Ccte, TCP, TCP-1-epsilon, TCPE	10090	MGI:107185
CCT6A	12466	chaperonin containing Tcp1, subunit 6a (zeta)	Cct6a	CCT-zeta, CCT-zeta-1, Cct6, Cctz-1, TCP-1-zeta	10090	MGI:107943
CCT8	12469	chaperonin containing Tcp1, subunit 8 (theta)	Cct8	AI132397, Cctq, Tcp, Tcpq	10090	MGI:107183
CD2AP	12488	CD2-associated protein	Cd2ap	AL024079, C78928, METS-, METS-1, Mets	10090	MGI:1330281
CD47	16423	CD47 antigen (Rh-related antigen, integrin-associated signal transducer)	Cd47	9130415E20Rik, AA407862, AI848868, AW108519, B430305P08Rik	10090	MGI:96617
CD99L2	171486	CD99 antigen-like 2	Cd99l2	AW548191, Mic2, Mic2l1, Xap89	10090	MGI:2177151
CDC37	12539	cell division cycle 37	Cdc37	p50, p50Cdc3, p50Cdc37	10090	MGI:109531
CDC42	12540	cell division cycle 42	Cdc42	AI747189, AU018915	10090	MGI:106211
CDC42BPB	217866	CDC42 binding protein kinase beta	Cdc42bpb	DMPK-l, MRCKb	10090	MGI:2136459
CDH11	12552	cadherin 11	Cdh11	Cad1, Cad11, OB-cad, OSF-4	10090	MGI:99217
CDIP1	66626	cell death inducing Trp53 target 1	Cdip1	2700048O17Rik, 5730403B10Rik, AU018521, AW742692, CD	10090	MGI:1913876
CDK14	18647	cyclin-dependent kinase 14	Cdk14	Pftk, Pftk1, mKIAA0834	10090	MGI:894318
CDK5	12568	cyclin-dependent kinase 5	Cdk5	AW048668, Crk, Crk6	10090	MGI:101765
CDS1	74596	CDP-diacylglycerol synthase 1	Cds1	4833409J18Rik, AI314024, AW125888	10090	MGI:1921846
CDS2	110911	CDP-diacylglycerol synthase (phosphatidate cytidylyltransferase) 2	Cds2	5730450N06Rik, 5730460C18Rik, AI854580, D2Wsu127, D2Wsu127e	10090	MGI:1332236
CEND1	57754	cell cycle exit and neuronal differentiation 1	Cend1	1500001H12Rik, AI415214, BM88	10090	MGI:1929898
CEP170	545389	centrosomal protein 170	Cep170	4933426L22Rik, A330004A13Rik, AI195353	10090	MGI:1918348
CEPT1	99712	choline/ethanolaminephosphotransferase 1	Cept1	9930118K05Rik, mCEPT1	10090	MGI:2139793
CETN2	26370	centrin 2	Cetn2	1110034A02Rik, AI326150, Calt, caltractin	10090	MGI:1347085
CFL1	12631	cofilin 1, non-muscle	Cfl1	AA959946, Cof, co, n-c	10090	MGI:101757
CHCHD3	66075	coiled-coil-helix-coiled-coil-helix domain containing 3	Chchd3	0610041L09Rik, 1700039J09Rik, AW558177, Mico, Micos19	10090	MGI:1913325
CHCHD4	72170	coiled-coil-helix-coiled-coil-helix domain containing 4	Chchd4	2410012P20Rik, 2810014D17Rik, AI838740	10090	MGI:1919420
CHCHD6	66098	coiled-coil-helix-coiled-coil-helix domain containing 6	Chchd6	0710001P09Rik, 1700021B03Rik, Mico, Micos25	10090	MGI:1913348
CHKB	12651	choline kinase beta	Chkb	CK/EK-bet, Chetk, Chk, Chkl, Ck	10090	MGI:1328313
CHL1	12661	cell adhesion molecule L1-like	Chl1	A530023M13Rik, AI465420, C, CALL, LIC	10090	MGI:1098266
CHMP4B	75608	charged multivesicular body protein 4B	Chmp4b	2010012F05Rik, C76846, Snf7, Snf7-2	10090	MGI:1922858
CHMP7	105513	charged multivesicular body protein 7	Chmp7	4930596K11Rik, 6330407G04Rik, AI450338, AW550775	10090	MGI:1913922
CHORDC1	66917	cysteine and histidine-rich domain (CHORD)-containing, zinc-binding protein 1	Chordc1	1110001O09Rik, AA409036, Chp-, Chp-1, mo	10090	MGI:1914167
CHRNA4	11438	cholinergic receptor, nicotinic, alpha polypeptide 4	Chrna4	Ac, Acr, Acra-4, Acra4, EBN1	10090	MGI:87888
CHRNB2	11444	cholinergic receptor, nicotinic, beta polypeptide 2 (neuronal)	Chrnb2	Acr, Acrb, Acrb-2, Acrb2, C030030P04Rik	10090	MGI:87891
CIAPIN1	109006	cytokine induced apoptosis inhibitor 1	Ciapin1	2810413N20Rik, AA617265, AU021794, a, anamorsin	10090	MGI:1922083
CKAP4	216197	cytoskeleton-associated protein 4	Ckap4	5630400A09Rik, CLIMP, CLIMP-63, P6, P63	10090	MGI:2444926
CKAP5	75786	cytoskeleton associated protein 5	Ckap5	3110043H24Rik, 4930432B04Rik, D730027C18Rik, T25636, mKIAA0097	10090	MGI:1923036
CKB	12709	creatine kinase, brain	Ckb	B-CK, Bck, CPK-B, Ck-3, Ck3	10090	MGI:88407
CKMT1	12716	creatine kinase, mitochondrial 1, ubiquitous	Ckmt1	Mt-CK, ScCKmit, U-MtCK, UbCKmi, UbCKmit	10090	MGI:99441
CLASP1	76707	CLIP associating protein 1	Clasp1	1700030C23Rik, 5730583A19Rik, B130045P17Rik, CL, CLA	10090	MGI:1923957
CLASP2	76499	CLIP associating protein 2	Clasp2	1500004F14Rik, 8030404L10Rik, C77448, CL, CLA	10090	MGI:1923749
CLINT1	216705	clathrin interactor 1	Clint1	AI642036, AW537616, C530049I24Rik, Enth, Ep	10090	MGI:2144243
CLIP2	269713	CAP-GLY domain containing linker protein 2	Clip2	B230327O20, CLIP-, CLIP-115, Clip1, Cyl	10090	MGI:1313136
CLNS1A	12729	chloride channel, nucleotide-sensitive, 1A	Clns1a	2610036D06Rik, 2610100O04Rik, Cl, Clci, Clcni	10090	MGI:109638
CLTA	12757	clathrin, light polypeptide (Lca)	Clta	AV026556, Lca	10090	MGI:894297
CLTB	74325	clathrin, light polypeptide (Lcb)	Cltb	2310046E19Rik, lcb	10090	MGI:1921575
CLTC	67300	clathrin, heavy polypeptide (Hc)	Cltc	3110065L21Rik, CHC, R74732	10090	MGI:2388633
CLVS1	74438	clavesin 1	Clvs1	4933402J24Rik, Clvl1, Rlb, Rlbp1l1	10090	MGI:1921688
CLVS2	215890	clavesin 2	Clvs2	A330019N05Rik, Rlb, Rlbp1l2	10090	MGI:2443223
CMBL	69574	carboxymethylenebutenolidase-like (Pseudomonas)	Cmbl	2310016A09Rik	10090	MGI:1916824
CNDP2	66054	CNDP dipeptidase 2 (metallopeptidase M20 family)	Cndp2	0610010E05Rik, C76600, Cn, Cn2, Dip	10090	MGI:1913304
CNKSR2	245684	connector enhancer of kinase suppressor of Ras 2	Cnksr2	Cnk, Cnk2, Ks, Ksr2	10090	MGI:2661175
CNN3	71994	calponin 3, acidic	Cnn3	1600014M03Rik, C85854, Ca, Calpo3	10090	MGI:1919244
CNRIP1	380686	cannabinoid receptor interacting protein 1	Cnrip1	1500041B16Rik, 3110054C06Rik, 5330437A18Rik, AI854501, C2orf32	10090	MGI:1917505
CNTN2	21367	contactin 2	Cntn2	D130012K04Rik, TAG, TAG-, TAG-1, TAG1	10090	MGI:104518
CNTNAP2	66797	contactin associated protein-like 2	Cntnap2	5430425M22Rik, Ca, Caspr2, mKIAA0868	10090	MGI:1914047
CNTNAP4	170571	contactin associated protein-like 4	Cntnap4	Ca, Caspr4, E130114F09Rik	10090	MGI:2183572
COASY	71743	Coenzyme A synthase	Coasy	1300003G02Rik, Dpc, Dpck, P, Ppat	10090	MGI:1918993
COL4A2	12827	collagen, type IV, alpha 2	Col4a2	Col4, Col4a-2	10090	MGI:88455
COPB1	70349	coatomer protein complex, subunit beta 1	Copb1	2610019B04Rik, Cop	10090	MGI:1917599
COPS2	12848	COP9 signalosome subunit 2	Cops2	AI315723, C85265, Cs, Csn2, Sg	10090	MGI:1330276
COPS4	26891	COP9 signalosome subunit 4	Cops4	AW208976, D5Ertd774, D5Ertd774e, SGN4	10090	MGI:1349414
COPS5	26754	COP9 signalosome subunit 5	Cops5	AI303502, CS, CSN5, Jab, Jab1	10090	MGI:1349415
COPS6	26893	COP9 signalosome subunit 6	Cops6	Sg, Sgn3, VIP/, VIP/MOV34	10090	MGI:1349439
COPS7A	26894	COP9 signalosome subunit 7A	Cops7a	D6Ertd35, D6Ertd35e, SGN7a	10090	MGI:1349400
CORO1A	12721	coronin, actin binding protein 1A	Coro1a	Cl, Clabp, Lmb, Lmb3, TACO	10090	MGI:1345961
CORO1B	23789	coronin, actin binding protein 1B	Coro1b		10090	MGI:1345963
CORO2A	107684	coronin, actin binding protein 2A	Coro2a	9030208C03Rik, AI563590, IR, IR10	10090	MGI:1345966
CORO2B	235431	coronin, actin binding protein, 2B	Coro2b	CLIPINC, E130012P22Rik	10090	MGI:2444283
COTL1	72042	coactosin-like 1 (Dictyostelium)	Cotl1	1810074P22Rik, 2010004C08Rik, Clp	10090	MGI:1919292
CPEB3	208922	cytoplasmic polyadenylation element binding protein 3	Cpeb3	4831444O18Rik, CPE-BP3, mKIAA0940	10090	MGI:2443075
CPLX1	12889	complexin 1	Cplx1	921-, 921-S	10090	MGI:104727
CPLX2	12890	complexin 2	Cplx2	921-, 921-L, AI413745, AW492120, Gm34843	10090	MGI:104726
CPNE3	70568	copine III	Cpne3	5430428M23Rik, 5730450C07Rik, C85108, CP, CPN3	10090	MGI:1917818
CPNE4	74020	copine IV	Cpne4	3632411M23Rik, 4933406O10Rik	10090	MGI:1921270
CPNE6	12891	copine VI	Cpne6	AU067659, BB076446	10090	MGI:1334445
CPNE7	102278	copine VII	Cpne7	AW047065	10090	MGI:2142747
CRBN	58799	cereblon	Crbn	2610203G15Rik, 2900045O07Rik, AF229032, AW108261, piL	10090	MGI:1913277
CRIP2	68337	cysteine rich protein 2	Crip2	0610010I23Rik, AW743261, C, C77570, CR	10090	MGI:1915587
CRK	12928	v-crk avian sarcoma virus CT10 oncogene homolog	Crk	Cr, Crk-I, Crk-II, Crk-III, Crk3	10090	MGI:88508
CRMP1	12933	collapsin response mediator protein 1	Crmp1	CRMP-1, DRP, DRP-1, Dpysl1, ULIP-3	10090	MGI:107793
CRTC1	382056	CREB regulated transcription coactivator 1	Crtc1	AI413414, Mect1, R74955, TOR, TORC1	10090	MGI:2142523
CSDE1	229663	cold shock domain containing E1, RNA binding	Csde1	AA960392, BC016898, D3Jfr, D3Jfr1, mKIAA0885	10090	MGI:92356
CSK	12988	c-src tyrosine kinase	Csk	AW212630, p50CSK	10090	MGI:88537
CSNK2A1	12995	casein kinase 2, alpha 1 polypeptide	Csnk2a1	CK2, Csnk2a, Csnk2a1-rs4	10090	MGI:88543
CSNK2B	13001	casein kinase 2, beta polypeptide	Csnk2b	CK II beta	10090	MGI:88548
CTBP1	13016	C-terminal binding protein 1	Ctbp1	B, BARS, CtBP3/, CtBP3/BARS, D4S115	10090	MGI:1201685
CTNNA2	12386	catenin (cadherin associated protein), alpha 2	Ctnna2	AI481747, Ca, Cat, Catna, Catna2	10090	MGI:88275
CTNND2	18163	catenin (cadherin associated protein), delta 2	Ctnnd2	Catn, Catnd2, Nprap, neuro, neurojugin	10090	MGI:1195966
CTPS2	55936	cytidine 5'-triphosphate synthase 2	Ctps2	A830031M15Rik, AI326475, CTP, Ctpsh	10090	MGI:1933185
CTTN	13043	cortactin	Cttn	1110020L01Rik, Ems, Ems1	10090	MGI:99695
CUL2	71745	cullin 2	Cul2	1300003D18Rik, 4932411N15Rik, AI327301, mKIAA4106	10090	MGI:1918995
CUL3	26554	cullin 3	Cul3	KIAA0617	10090	MGI:1347360
CUTA	67675	cutA divalent cation tolerance homolog	Cuta	0610039D01Rik, 1810022E02Rik, 1810060C03Rik, 2700094G22Rik, AI326454	10090	MGI:1914925
CXADR	13052	coxsackie virus and adenovirus receptor	Cxadr	2610206D03Rik, AU016810, AW553441, C, CAR	10090	MGI:1201679
CYB5B	66427	cytochrome b5 type B	Cyb5b	1810044O22Rik, AU015618, Cyb5m	10090	MGI:1913677
CYB5R1	72017	cytochrome b5 reductase 1	Cyb5r1	1500005G05Rik, B5R., B5R.1, C80155, Nqo	10090	MGI:1919267
CYB5R3	109754	cytochrome b5 reductase 3	Cyb5r3	0610016L08Rik, 2500002N19Rik, B5R, C85115, Di	10090	MGI:94893
CYC1	66445	cytochrome c-1	Cyc1	2610002H19Rik, AA408921, Cyct1	10090	MGI:1913695
CYFIP1	20430	cytoplasmic FMR1 interacting protein 1	Cyfip1	E030028J09Rik, P140S, P140SRA-1, P140sra1, Shy	10090	MGI:1338801
CYFIP2	76884	cytoplasmic FMR1 interacting protein 2	Cyfip2	1500004I01Rik, 6430511D02Rik, AA930218, AU022376, Pir	10090	MGI:1924134
CYLD	74256	CYLD lysine 63 deubiquitinase	Cyld	2010013M14Rik, 2900009M21Rik, C130039D01Rik, CDMT, CYLD1	10090	MGI:1921506
CYRIB	223601	CYFIP related Rac1 interactor B	Cyrib	0910001A06Rik, AW122079, Fam49, Fam49b	10090	MGI:1923520
CYSTM1	66060	cysteine-rich transmembrane module containing 1	Cystm1	0610010O12Rik	10090	MGI:1913310
CYTH3	19159	cytohesin 3	Cyth3	AI648983, ARNO3, CLM3, Gr, Grp1	10090	MGI:1335107
DAB1	13131	disabled 1	Dab1	AI956902, C630028C02Rik, scm, scr, scrambler	10090	MGI:108554
DAGLB	231871	diacylglycerol lipase, beta	Daglb	E330036I19Rik	10090	MGI:2442032
DAZAP1	70248	DAZ associated protein 1	Dazap1	2410042M16Rik, m, mPrrp	10090	MGI:1917498
DBN1	56320	drebrin 1	Dbn1		10090	MGI:1931838
DBNL	13169	drebrin-like	Dbnl	AB, Abp1, SH3, SH3P7, mAb	10090	MGI:700006
DCC	13176	deleted in colorectal carcinoma	Dcc	C030036D22Rik, Igdcc, Igdcc1	10090	MGI:94869
DCLK1	13175	doublecortin-like kinase 1	Dclk1	1700113D08Rik, 2810480F11Rik, AI836758, CPG1, Clic	10090	MGI:1330861
DCTN1	13191	dynactin 1	Dctn1	AL022633, DAP-150, DP-150, Glue, Glued	10090	MGI:107745
DCTN2	69654	dynactin 2	Dctn2	2310042E05Rik, C130077D06Rik, C87049, DCTN-5, DCTN-50	10090	MGI:107733
DCTN4	67665	dynactin 4	Dctn4	1110001K06Rik, 4930547K17Rik, C130039E17Rik, p6, p62	10090	MGI:1914915
DDC	13195	dopa decarboxylase	Ddc	Aa, Aadc	10090	MGI:94876
DDHD1	114874	DDHD domain containing 1	Ddhd1	Mir5131, PA-PLA1	10090	MGI:2150302
DDI2	68817	DNA-damage inducible protein 2	Ddi2	1110056G13Rik, 1700027M01Rik, 9130022E05Rik, AI604911, AU040698	10090	MGI:1917244
DDX1	104721	DEAD box helicase 1	Ddx1	AA409185, DBP-RB	10090	MGI:2144727
DGKE	56077	diacylglycerol kinase, epsilon	Dgke	C87606, DAGK, DAGK6, DGK, DGK-epsilon	10090	MGI:1889276
DGKQ	110524	diacylglycerol kinase, theta	Dgkq	110kD, 110kDa, DAGK, DAGK7, Dagk4	10090	MGI:102918
DHRS1	52585	dehydrogenase/reductase (SDR family) member 1	Dhrs1	1110029G07Rik, AW112170, D14Ertd484e	10090	MGI:1196314
DIP2A	64451	disco interacting protein 2 homolog A	Dip2a	4931420H10Rik, AI426328, Di, Dip2, Kiaa0184-hp	10090	MGI:2385920
DIP2B	239667	disco interacting protein 2 homolog B	Dip2b	4932422C22, AI317237, AI854602, mKIAA1463	10090	MGI:2145977
DIRAS1	208666	DIRAS family, GTP-binding RAS-like 1	Diras1	Di-, Di-Ras1, GBTS, Gbts1, RIG	10090	MGI:2183442
DIRAS2	68203	DIRAS family, GTP-binding RAS-like 2	Diras2	2900052J15Rik, AI414999	10090	MGI:1915453
DLG1	13383	discs large MAGUK scaffold protein 1	Dlg1	B130052P05Rik, Dlgh, Dlgh1, E-dlg/SAP97, SA	10090	MGI:107231
DLG4	13385	discs large MAGUK scaffold protein 4	Dlg4	Dlgh, Dlgh4, PSD, PSD-, PSD-95	10090	MGI:1277959
DLGAP4	228836	DLG associated protein 4	Dlgap4	AI225853, BC024558, DA, DAP-4, DAP4	10090	MGI:2138865
DMTN	13829	dematin actin binding protein	Dmtn	AI325486, Epb4., Epb4.9, Epb49, dema	10090	MGI:99670
DMXL2	235380	Dmx-like 2	Dmxl2	6330586A12, 6430411K14Rik, E130119P06Rik, mKIAA0856	10090	MGI:2444630
DNAJA1	15502	DnaJ heat shock protein family (Hsp40) member A1	Dnaja1	HSJ-2, Hsj, Hsj2, Nedd, Nedd7	10090	MGI:1270129
DNAJA2	56445	DnaJ heat shock protein family (Hsp40) member A2	Dnaja2	1500017M13Rik, 2010206B19Rik, DNAJ, DNJ, DNJ3	10090	MGI:1931882
DNAJB4	67035	DnaJ heat shock protein family (Hsp40) member B4	Dnajb4	1700029A20Rik, 2010306G19Rik, 5730460G06Rik	10090	MGI:1914285
DNAJC12	30045	DnaJ heat shock protein family (Hsp40) member C12	Dnajc12	Jdp, Jdp1, mJDP, mJDP1	10090	MGI:1353428
DNAJC27	217378	DnaJ heat shock protein family (Hsp40) member C27	Dnajc27	AI639580, C330021A05Rik, Ra, Rabj, Rb	10090	MGI:2443036
DNAJC5	13002	DnaJ heat shock protein family (Hsp40) member C5	Dnajc5	2610314I24Rik, AU018536, C, Csp	10090	MGI:892995
DNAJC6	72685	DnaJ heat shock protein family (Hsp40) member C6	Dnajc6	2810027M23Rik, au, mKIAA0473	10090	MGI:1919935
DNM1	13429	dynamin 1	Dnm1	AI838169, Dnm, Ftf, Ftfl, mKIAA4093	10090	MGI:107384
DNM1L	74006	dynamin 1-like	Dnm1l	6330417M19Rik, AI450666, Dlp1, Dnm, Dnmlp1	10090	MGI:1921256
DNM2	13430	dynamin 2	Dnm2	Dyn, Dyn2, Udnm, b2b2159C, b2b2159Clo	10090	MGI:109547
DNM3	103967	dynamin 3	Dnm3	9630020E24Rik, AW061159, B230343F03Rik, C530045C17, Dyna III	10090	MGI:1341299
DNPEP	13437	aspartyl aminopeptidase	Dnpep	AA407814	10090	MGI:1278328
DOCK3	208869	dedicator of cyto-kinesis 3	Dock3	MOCA, Mo, P, PBP, mKIAA0299	10090	MGI:2429763
DOCK9	105445	dedicator of cytokinesis 9	Dock9	AA959601, AW538057, B230309H04Rik, D14Wsu89, D14Wsu89e	10090	MGI:106321
DPP10	269109	dipeptidylpeptidase 10	Dpp10	6430601K09Rik, DP, DPP X, Dprp3	10090	MGI:2442409
DPY30	66310	dpy-30, histone methyltransferase complex regulatory subunit	Dpy30	2810410M20Rik, C87842	10090	MGI:1913560
DPYSL2	12934	dihydropyrimidinase-like 2	Dpysl2	AI851130, Crm, Crmp2, DR, DRP2	10090	MGI:1349763
DPYSL3	22240	dihydropyrimidinase-like 3	Dpysl3	CRMP, CRMP-4, DRP-3, TUC4, U	10090	MGI:1349762
DPYSL5	65254	dihydropyrimidinase-like 5	Dpysl5	CR, CRAM, CRMP, CRMP-5, Crm	10090	MGI:1929772
DRG2	13495	developmentally regulated GTP binding protein 2	Drg2	AI255295, AI461605, DRG-2	10090	MGI:1342307
DST	13518	dystonin	Dst	2310001O04Rik, A830042E19Rik, AW554249, BP230, BPAG1-n	10090	MGI:104627
DTNA	13527	dystrobrevin alpha	Dtna	2210407P21Rik, A, DTN-A, Dt, Dtn	10090	MGI:106039
DTX3	80904	deltex 3, E3 ubiquitin ligase	Dtx3	Deltex3, mg310	10090	MGI:2135752
DUSP3	72349	dual specificity phosphatase 3 (vaccinia virus phosphatase VH1-related)	Dusp3	2210015O03Rik, 5031436O03Rik, T-DSP, T-DSP11, V	10090	MGI:1919599
DVL1	13542	dishevelled segment polarity protein 1	Dvl1	Dvl, mKIAA4029	10090	MGI:94941
DVL2	13543	dishevelled segment polarity protein 2	Dvl2		10090	MGI:106613
DYNC1H1	13424	dynein cytoplasmic 1 heavy chain 1	Dync1h1	9930018I23Rik, AI894280, DHC1, DHC1a, DNCL	10090	MGI:103147
DYNC1I1	13426	dynein cytoplasmic 1 intermediate chain 1	Dync1i1	DH IC-1, DHIC-1, DI, DIC, Dnci	10090	MGI:107743
DYNC1I2	13427	dynein cytoplasmic 1 intermediate chain 2	Dync1i2	3110079H08Rik, AW554389, Dnci, Dncic2	10090	MGI:107750
DYNC1LI1	235661	dynein cytoplasmic 1 light intermediate chain 1	Dync1li1	1110053F02Rik, Dncl, Dnclic1, LIC, LIC-1	10090	MGI:2135610
DYNC1LI2	234663	dynein, cytoplasmic 1 light intermediate chain 2	Dync1li2	AA409702, C920003I06, Dnc, Dncl, Dncli2	10090	MGI:107738
DYNLL1	56455	dynein light chain LC8-type 1	Dynll1	DLC, Dlc8, Dncl, Dnclc1, Pin	10090	MGI:1861457
DYNLL2	68097	dynein light chain LC8-type 2	Dynll2	1700064A15Rik, 6720463E02Rik, C87222, DLC8, DLC8b	10090	MGI:1915347
DYNLT3	67117	dynein light chain Tctex-type 3	Dynlt3	2310075M16Rik, AU042796, Tcte1, Tcte1l	10090	MGI:1914367
EEF1A1	13627	eukaryotic translation elongation factor 1 alpha 1	Eef1a1		10090	MGI:1096881
EEF1A2	13628	eukaryotic translation elongation factor 1 alpha 2	Eef1a2	EEF1AL, EF-1-alpha-2, Eef1, Eef1a, S	10090	MGI:1096317
EEF1D	66656	eukaryotic translation elongation factor 1 delta (guanine nucleotide exchange protein)	Eef1d	EF-1-delta	10090	MGI:1913906
EFHD2	27984	EF hand domain containing 2	Efhd2	2600015J22Rik, AA408606, D4Wsu27, D4Wsu27e	10090	MGI:106504
EFR3B	668212	EFR3 homolog B	Efr3b	AI852640, C030014M07Rik, mKIAA0953	10090	MGI:2444851
EHD1	13660	EH-domain containing 1	Ehd1	AA409636, Pa, Past1, RME-, RME-1	10090	MGI:1341878
EHD3	57440	EH-domain containing 3	Ehd3	Ehd2	10090	MGI:1928900
EHD4	98878	EH-domain containing 4	Ehd4	2210022F10Rik, AI197390, AI846352, AV006278, Past2	10090	MGI:1919619
EIF2S1	13665	eukaryotic translation initiation factor 2, subunit 1 alpha	Eif2s1	0910001O23Rik, 2410026C18Rik, 35kDa, Eif, Eif2a	10090	MGI:95299
EIF3E	16341	eukaryotic translation initiation factor 3, subunit E	Eif3e	48kD, 48kDa, Eif3, Eif3s6, In	10090	MGI:99257
EIF3L	223691	eukaryotic translation initiation factor 3, subunit L	Eif3l	0610011H21Rik, D15N1, D15N1e, Eif3, Eif3eip	10090	MGI:2386251
EIF4A2	13682	eukaryotic translation initiation factor 4A2	Eif4a2	4833432N07Rik, BM-010, Ddx2b, Eif, Eif4	10090	MGI:106906
EIF4B	75705	eukaryotic translation initiation factor 4B	Eif4b	2310046H11Rik, AL024095, C85189, Eif4a2	10090	MGI:95304
EIF4E	13684	eukaryotic translation initiation factor 4E	Eif4e	EG668879, Eif4e-ps, If4, If4e, eIF-4	10090	MGI:95305
EIF4EBP2	13688	eukaryotic translation initiation factor 4E binding protein 2	Eif4ebp2	2810011I19Rik, 4E-BP, 4E-BP2, AA792569, BC010348	10090	MGI:109198
EIF4G1	208643	eukaryotic translation initiation factor 4, gamma 1	Eif4g1	E030015G23Rik, eIF-4-gamma 1, eIF-4G 1, eIF-4G1, eIF4GI	10090	MGI:2384784
EIF4G3	230861	eukaryotic translation initiation factor 4 gamma, 3	Eif4g3	1500002J22Rik, 4930523M17Rik, G1-419-52, Gm32394, eIF4	10090	MGI:1923935
EIF4H	22384	eukaryotic translation initiation factor 4H	Eif4h	AU018978, D5Ertd355, D5Ertd355e, E430026L18Rik, Ef4h	10090	MGI:1341822
EIF5	217869	eukaryotic translation initiation factor 5	Eif5	2810011H21Rik, D12Ertd549, D12Ertd549e	10090	MGI:95309
EIF5A	276770	eukaryotic translation initiation factor 5A	Eif5a	AA410058, D19Wsu54, D19Wsu54e, Eif4d, Eif5a1	10090	MGI:106248
EIPR1	380752	EARP complex and GARP complex interacting protein 1	Eipr1	D12Ertd604, D12Ertd604e, Tss, Tssc1	10090	MGI:1289332
ELFN1	243312	leucine rich repeat and fibronectin type III, extracellular 1	Elfn1	A930017N06Rik, AI197272, Ppp1r28	10090	MGI:2442479
ELFN2	207393	leucine rich repeat and fibronectin type III, extracellular 2	Elfn2	6330514E13, AW048948, BC094219, Lrr, Lrrc62	10090	MGI:3608416
ELP1	230233	elongator complex protein 1	Elp1	3110040G09Rik, 6030413P05, C78473, I, IKAP	10090	MGI:1914544
EMD	13726	emerin	Emd	AW550900, Sta	10090	MGI:108117
EML2	72205	echinoderm microtubule associated protein like 2	Eml2	1600029N02Rik, EMAP-2	10090	MGI:1919455
ENAH	13800	ENAH actin regulator	Enah	Me, Mena, NDPP-1, Nd, Ndpp1	10090	MGI:108360
ENO1	13806	enolase 1, alpha non-neuron	Eno1	AL022784, Eno, Eno-1, MBP-1, NNE	10090	MGI:95393
ENO2	13807	enolase 2, gamma neuronal	Eno2	AI837106, D6Ertd375, D6Ertd375e, Eno, Eno-2	10090	MGI:95394
ENOPH1	67870	enolase-phosphatase 1	Enoph1	2310057D15Rik, BB183658, C81437	10090	MGI:1915120
ENSA	56205	endosulfine alpha	Ensa	1700020C18Rik, 2610007F17Rik, AI451924	10090	MGI:1891189
EPB41L2	13822	erythrocyte membrane protein band 4.1 like 2	Epb41l2	4.1G, AW555191, D10Ertd398, D10Ertd398e, Epb4.1	10090	MGI:103009
EPB41L3	13823	erythrocyte membrane protein band 4.1 like 3	Epb41l3	4.1B, DA, DAL1P, Dal1, Epb4.1	10090	MGI:103008
EPHA4	13838	Eph receptor A4	Epha4	2900005C20Rik, AI385584, Cek8, Hek8, Se	10090	MGI:98277
EPM2AIP1	77781	EPM2A (laforin) interacting protein 1	Epm2aip1	A930003G21Rik, mKIAA0766	10090	MGI:1925031
EPN1	13854	epsin 1	Epn1	AA269831, Ib, Ibp1	10090	MGI:1333763
EPN2	13855	epsin 2	Epn2	9530051D10Rik, AA536924, Ib, Ibp2	10090	MGI:1333766
EPS8	13860	epidermal growth factor receptor pathway substrate 8	Eps8	AW261790	10090	MGI:104684
ERC1	111173	ELKS/RAB6-interacting/CAST family member 1	Erc1	4930404L01Rik, 5033405M01Rik, 9630025C19Rik, B430107L16Rik, CAST2	10090	MGI:2151013
ERC2	238988	ELKS/RAB6-interacting/CAST family member 2	Erc2	6430531D06, CA, CAST, CAST1/ERC2, D14Ertd171	10090	MGI:1098749
ERCC3	13872	excision repair cross-complementing rodent repair deficiency, complementation group 3	Ercc3	BTF2 p89, Ercc-3, XP, XPB	10090	MGI:95414
ERI3	140546	exoribonuclease 3	Eri3	P, PI, PINT1, Prnpip1	10090	MGI:2153887
ESD	13885	esterase D/formylglutathione hydrolase	Esd	Es, Es-1, Es-10, Es1, Es10	10090	MGI:95421
ETF1	225363	eukaryotic translation termination factor 1	Etf1	AI463371, D6Ertd109, D6Ertd109e, ERF, ERF1	10090	MGI:2385071
EVL	14026	Ena-vasodilator stimulated phosphoprotein	Evl	AI528774, b2b2600C, b2b2600Clo	10090	MGI:1194884
EXOC4	20336	exocyst complex component 4	Exoc4	C78892, Sec, Sec8, Sec8l1	10090	MGI:1096376
EXOC6B	75914	exocyst complex component 6B	Exoc6b	4930569O18Rik, G430127E12Rik, Sec15, Sec15b, Sec15l2	10090	MGI:1923164
EXOC7	53413	exocyst complex component 7	Exoc7	70kD, Exo7, Exo70, sec7, sec70	10090	MGI:1859270
EXOC8	102058	exocyst complex component 8	Exoc8	AI414418, EXO8, EXO84, Exo84p, R74783	10090	MGI:2142527
FAF2	76577	Fas associated factor family member 2	Faf2	2210404D11Rik, AI462440, Ubxd8, mKIAA0887	10090	MGI:1923827
FAM114A2	67726	family with sequence similarity 114, member A2	Fam114a2	1810073G14Rik, 9030624B09Rik	10090	MGI:1917629
FAM126B	213056	family with sequence similarity 126, member B	Fam126b	C130065N10Rik, D1Ertd53, D1Ertd53e, D630010C10	10090	MGI:1098784
FAM131B	76156	family with sequence similarity 131, member B	Fam131b	6330503C03Rik, 6530406I18Rik, AV277466	10090	MGI:1923406
FAM171A2	217219	family with sequence similarity 171, member A2	Fam171a2		10090	MGI:2448496
FAM177A1	73385	family with sequence similarity 177, member A	Fam177a	1700047I17Rik, 1700047I17Rik1, C14orf24, D730001C10Rik, Fam177a1	10090	MGI:1920635
FAM98A	72722	family with sequence similarity 98, member A	Fam98a	2810405J04Rik, AL024114	10090	MGI:1919972
FASN	14104	fatty acid synthase	Fasn	A630082H08Rik, F, FAS	10090	MGI:95485
FBXL16	214931	F-box and leucine-rich repeat protein 16	Fbxl16	BC042620, Scirr1	10090	MGI:2448488
FBXL17	50758	F-box and leucine-rich repeat protein 17	Fbxl17	6330576B01Rik, AI452053, BB073797, C130023C01Rik, Fbx13	10090	MGI:1354704
FBXO2	230904	F-box protein 2	Fbxo2	FBG1, FBX2, Fbs, Fbs1, Fbs2	10090	MGI:2446216
FBXO41	330369	F-box protein 41	Fbxo41	9630017H13, D6Ertd538, D6Ertd538e	10090	MGI:1261912
FGF1	14164	fibroblast growth factor 1	Fgf1	Dffrx, Fam, Fgf, Fgf-1, Fgf2b	10090	MGI:95515
FKBP1A	14225	FK506 binding protein 1a	Fkbp1a	FKBP12, Fkb, Fkbp, Fkbp1	10090	MGI:95541
FKBP8	14232	FK506 binding protein 8	Fkbp8	38kD, 38kDa, FKBP-38, FKBP-8, FKBPR38	10090	MGI:1341070
FLAD1	319945	flavin adenine dinucleotide synthetase 1	Flad1	A930017E24Rik, Pp5, Pp591	10090	MGI:2443030
FLOT2	14252	flotillin 2	Flot2	AI573412, E, Esa, reggie, reggie-2	10090	MGI:103309
FMN2	54418	formin 2	Fmn2	AU024104	10090	MGI:1859252
FN3K	63828	fructosamine 3 kinase	Fn3k	2310074G21Rik	10090	MGI:1926834
FNBP1	14269	formin binding protein 1	Fnbp1	1110057E06Rik, 2210010H06Rik, FBP, FBP1, Fbp17	10090	MGI:109606
FNTB	110606	farnesyltransferase, CAAX box, beta	Fntb	2010013E13Rik, AA409500	10090	MGI:1861305
FRMD4A	209630	FERM domain containing 4A	Frmd4a	2700017I06Rik, 5330420J21, AI594879, C230040M21Rik, Frmd4	10090	MGI:1919850
FRS3	107971	fibroblast growth factor receptor substrate 3	Frs3	4930417B13Rik, AI449674, Frs2b, Frs2beta, SN	10090	MGI:2135965
FRY	320365	FRY microtubule binding protein	Fry	13CDNA73, 9330186A19Rik, AF346502, AI462658, C87180	10090	MGI:2443895
FSCN1	14086	fascin actin-bundling protein 1	Fscn1	AI663989, Fa, Fan1, fasc, fascin-1	10090	MGI:1352745
FSD1	240121	fibronectin type 3 and SPRY domain-containing protein	Fsd1		10090	MGI:1934858
FTH1	14319	ferritin heavy polypeptide 1	Fth1	FHC, Fth, H-fer, HFt, MFH	10090	MGI:95588
FXR1	14359	fragile X mental retardation gene 1, autosomal homolog	Fxr1	1110050J02Rik, 9530073J07Rik, AI851072, Fxr, Fxr1h	10090	MGI:104860
FXYD7	57780	FXYD domain-containing ion transport regulator 7	Fxyd7	1110035I01Rik	10090	MGI:1889006
FYN	14360	Fyn proto-oncogene	Fyn	AI448320, AW552119	10090	MGI:95602
G3BP2	23881	GTPase activating protein (SH3 domain) binding protein 2	G3bp2	AA409541, E430034L04Rik, G3B, G3BP, mKIAA0660	10090	MGI:2442040
GAB2	14389	growth factor receptor bound protein 2-associated protein 2	Gab2	AI463667, D130058I17Rik, p9, p97	10090	MGI:1333854
GABARAPL2	93739	gamma-aminobutyric acid (GABA) A receptor-associated protein-like 2	Gabarapl2	0610012F20Rik, 2900019O08Rik, AI173605, GATE-1, GATE-16	10090	MGI:1890602
GABBR2	242425	gamma-aminobutyric acid (GABA) B receptor, 2	Gabbr2	GABABR2, Gaba, Gb2, Gm425, Gpr	10090	MGI:2386030
GAP43	14432	growth associated protein 43	Gap43	B-50, Ba, Basp2, GAP-, GAP-43	10090	MGI:95639
GAPDH	14433	glyceraldehyde-3-phosphate dehydrogenase	Gapdh	Ga, Gapd	10090	MGI:95640
GAPVD1	66691	GTPase activating protein and VPS9 domains 1	Gapvd1	2010005B09Rik, 4432404J10Rik, AW108497, Gapex-5, RAP6	10090	MGI:1913941
GAREM1	381126	GRB2 associated regulator of MAPK1 subtype 1	Garem1	C86169, Fam5, Fam59a, Gar, Garem	10090	MGI:2685790
GARS1	353172	glycyl-tRNA synthetase	Gars	GENA202, Gars1, Gena2, Gena201, Nmf249	10090	MGI:2449057
GART	14450	phosphoribosylglycinamide formyltransferase	Gart	G, Gaps, P, Prgs	10090	MGI:95654
GATD1	213350	glutamine amidotransferase like class 1 domain containing 1	Gatd1	BC023835, D230016J19Rik, Pddc, Pddc1	10090	MGI:2387178
GBA2	230101	glucosidase beta 2	Gba2	F630034E04	10090	MGI:2654325
GBE1	74185	glucan (1,4-alpha-), branching enzyme 1	Gbe1	2310045H19Rik, 2810426P10Rik, D16Ertd536, D16Ertd536e	10090	MGI:1921435
GCH1	14528	GTP cyclohydrolase 1	Gch1	GTP-C, GTP-CH, GTP-CH-I, GTPC, GTPCH	10090	MGI:95675
GDAP1	14545	ganglioside-induced differentiation-associated-protein 1	Gdap1		10090	MGI:1338002
GDAP1L1	228858	ganglioside-induced differentiation-associated protein 1-like 1	Gdap1l1	Gdap1l	10090	MGI:2385163
GDI1	14567	guanosine diphosphate (GDP) dissociation inhibitor 1	Gdi1	GD, GDIA, GDIalpha	10090	MGI:99846
GDI2	14569	guanosine diphosphate (GDP) dissociation inhibitor 2	Gdi2	GDI, GDI-, GDI-B, GDIB, Gdi3	10090	MGI:99845
GDPD1	66569	glycerophosphodiester phosphodiesterase domain containing 1	Gdpd1	2610020H15Rik	10090	MGI:1913819
GFOD1	328232	glucose-fructose oxidoreductase domain containing 1	Gfod1	9630032O13, AI850995	10090	MGI:2145304
GGA3	260302	golgi associated, gamma adaptin ear containing, ARF binding protein 3	Gga3	C230037M19Rik, mKIAA0154	10090	MGI:2384159
GIPC1	67903	GIPC PDZ domain containing family, member 1	Gipc1	GIPC, Glut1, Glut1CIP, Rgs1, Rgs19ip1	10090	MGI:1926252
GIT1	216963	GIT ArfGAP 1	Git1	Cat-, Cat-1, p95C, p95Cat	10090	MGI:1927140
GK	14933	glycerol kinase	Gk	D930012N15Rik, Gyk	10090	MGI:106594
GLMN	170823	glomulin, FKBP associated protein	Glmn	9330160J16Rik, AW227515, Fap48, Fap68	10090	MGI:2141180
GLOD4	67201	glyoxalase domain containing 4	Glod4	1700082G03Rik, 2700085E05Rik, C81254	10090	MGI:1914451
GLRX	93692	glutaredoxin	Glrx	C86710, D13Wsu156, D13Wsu156e, Glrx1, Grx	10090	MGI:2135625
GLS	14660	glutaminase	Gls	6330442B14, AI314027, B230365M23Rik	10090	MGI:95752
KIAA1210	101055983	predicted gene 14569	Gm14569	Kiaa1210	10090	MGI:3705243
GMDS	218138	GDP-mannose 4, 6-dehydratase	Gmds	BC031788, C87208	10090	MGI:1891112
GMFB	63985	glia maturation factor, beta	Gmfb	3110001H22Rik, 3110001O16Rik, AI851627, C79176, D14Ertd630	10090	MGI:1927133
GMPS	229363	guanine monophosphate synthetase	Gmps	670032, AA591640, AI047208, Gm9479	10090	MGI:2448526
GNA11	14672	guanine nucleotide binding protein, alpha 11	Gna11	Dsk, Dsk7, E430025L19, g alpha-11	10090	MGI:95766
GNA13	14674	guanine nucleotide binding protein, alpha 13	Gna13	AU024132, AU043124, Galp, Galpha13	10090	MGI:95768
GNAI2	14678	guanine nucleotide binding protein (G protein), alpha inhibiting 2	Gnai2	C76432, G, Gal, Galphai2, Gia	10090	MGI:95772
GNAO1	14681	guanine nucleotide binding protein, alpha O	Gnao1	AW050213, Ga, Galphao, Gnao, a	10090	MGI:95775
GNAZ	14687	guanine nucleotide binding protein, alpha z subunit	Gnaz	AI847979, Gz	10090	MGI:95780
GNB2	14693	guanine nucleotide binding protein (G protein), beta 2	Gnb2	Gnb-2	10090	MGI:95784
GNG3	14704	guanine nucleotide binding protein (G protein), gamma 3	Gng3		10090	MGI:102704
GNG4	14706	guanine nucleotide binding protein (G protein), gamma 4	Gng4		10090	MGI:102703
GNL1	14670	guanine nucleotide binding protein-like 1	Gnl1	Gn, Gna, Gna-rs1, Gnal1	10090	MGI:95764
GNPDA1	26384	glucosamine-6-phosphate deaminase 1	Gnpda1	G, GNPDA, Gn, Gnp1, Gnpi	10090	MGI:1347054
GPD2	14571	glycerol phosphate dehydrogenase 2, mitochondrial	Gpd2	AA408484, AI448216, AU021455, AW494132, GPDH	10090	MGI:99778
GPI	14751	glucose-6-phosphate isomerase 1	Gpi1	AM, Amf, Gpi, Gpi-, Gpi-1	10090	MGI:95797
GPM6A	234267	glycoprotein m6a	Gpm6a	Gpm, Gpm6, M6, M6A	10090	MGI:107671
GPR158	241263	G protein-coupled receptor 158	Gpr158	5330427M13Rik, mKIAA1136	10090	MGI:2441697
GPR26	233919	G protein-coupled receptor 26	Gpr26	9630036A11Rik, A730021D22	10090	MGI:2441758
GPRIN1	26913	G protein-regulated inducer of neurite outgrowth 1	Gprin1	GR, GRIN1, Z16	10090	MGI:1349455
GPS1	209318	G protein pathway suppressor 1	Gps1	CO, Cops1, Cs, Csn1, R75577	10090	MGI:2384801
GPSM1	67839	G-protein signalling modulator 1 (AGS3-like, C. elegans)	Gpsm1	1810037C22Rik, AW107933, Ag, Ags3	10090	MGI:1915089
GPX4	625249	glutathione peroxidase 4	Gpx4	GPx-4, GSHPx-4, PHG, PHGPx, mtPHG	10090	MGI:104767
GRB2	14784	growth factor receptor bound protein 2	Grb2	AA408164, Ash	10090	MGI:95805
GRHPR	76238	glyoxylate reductase/hydroxypyruvate reductase	Grhpr	1110059D05Rik, 6430629L09Rik, Glxr	10090	MGI:1923488
GRIA2	14800	glutamate receptor, ionotropic, AMPA2 (alpha 2)	Gria2	Glu, GluA2, GluR, GluR-B, Glur-2	10090	MGI:95809
GRIA3	53623	glutamate receptor, ionotropic, AMPA3 (alpha 3)	Gria3	2900064I19Rik, Glu, GluA3, GluR-C, GluR-K3	10090	MGI:95810
GRIN1	14810	glutamate receptor, ionotropic, NMDA1 (zeta 1)	Grin1	GluN1, GluRdelta1, GluRze, GluRzeta1, M100174	10090	MGI:95819
GRIP1	74053	glutamate receptor interacting protein 1	Grip1	4931400F03Rik, GRIP, eb	10090	MGI:1921303
GRIPAP1	54645	GRIP1 associated protein 1	Gripap1	AI854681, DXImx47, DXImx47e, GRA, GRASP-1	10090	MGI:1859616
GRK2	110355	G protein-coupled receptor kinase 2	Grk2	Adrb, Adrbk, Adrbk-1, Adrbk1, Bark	10090	MGI:87940
ADRBK2	320129	G protein-coupled receptor kinase 3	Grk3	4833444A01Rik, AI851927, AW551196, Adrb, Adrbk	10090	MGI:87941
GRM1	14816	glutamate receptor, metabotropic 1	Grm1	4930455H15Rik, Gm10828, Gpr, Gprc1a, Grm	10090	MGI:1351338
GRM2	108068	glutamate receptor, metabotropic 2	Grm2	4930441L02Rik, Gprc, Gprc1b, mGlu, mGluR2	10090	MGI:1351339
GRM5	108071	glutamate receptor, metabotropic 5	Grm5	6430542K11Rik, AI850523, Glu, Glu5R, Gprc	10090	MGI:1351342
GSDME	54722	gasdermin E	Gsdme	2310037D07Rik, 4932441K13Rik, Dfn, Dfna, Dfna5	10090	MGI:1889850
GSK3A	606496	glycogen synthase kinase 3 alpha	Gsk3a	2700086H06Rik	10090	MGI:2152453
GSK3B	56637	glycogen synthase kinase 3 beta	Gsk3b	7330414F15Rik, 8430431H08Rik, C86142, GSK, GSK-	10090	MGI:1861437
GSPT1	14852	G1 to S phase transition 1	Gspt1	AI314175, AI326449, AV307676, C79774, G1s	10090	MGI:1316728
GSPT2	14853	G1 to S phase transition 2	Gspt2		10090	MGI:1316727
GSTA4	14860	glutathione S-transferase, alpha 4	Gsta4	GST5.7, mGst, mGsta4	10090	MGI:1309515
GSTO1	14873	glutathione S-transferase omega 1	Gsto1	AA407097, AI194287, AU018802, GST, Gsto-1	10090	MGI:1342273
GSTZ1	14874	glutathione transferase zeta 1 (maleylacetoacetate isomerase)	Gstz1	GSTZ1-1, MAAI	10090	MGI:1341859
GUK1	14923	guanylate kinase 1	Guk1	AA409738, AL033299, AL033300, AV026611, Gmk	10090	MGI:95871
GYG1	27357	glycogenin	Gyg	AU017667, GN1, Gyg1	10090	MGI:1351614
HBS1L	56422	Hbs1-like (S. cerevisiae)	Hbs1l	2810035F15Rik, AI326327, eR, eRFS	10090	MGI:1891704
HDAC6	15185	histone deacetylase 6	Hdac6	Hd6, Hdac5, Sfc, Sfc6, mHDA	10090	MGI:1333752
HDHD2	76987	haloacid dehalogenase-like hydrolase domain containing 2	Hdhd2	0610039H12Rik, 3110052N05Rik	10090	MGI:1924237
HECW2	329152	HECT, C2 and WW domain containing E3 ubiquitin protein ligase 2	Hecw2	A730039N16Rik, D030049F17Rik, Gm971, Ned, Nedl2	10090	MGI:2685817
HGS	15239	HGF-regulated tyrosine kinase substrate	Hgs	H, Hgr, Hrs, ZFYVE8, t	10090	MGI:104681
HID1	217310	HID1 domain containing	Hid1	C630004H02Rik	10090	MGI:2445087
HINT1	15254	histidine triad nucleotide binding protein 1	Hint1	AA673479, Hint, Ip, Ipk1, PKCI	10090	MGI:1321133
HIP1R	29816	huntingtin interacting protein 1 related	Hip1r	AA410023, mKIAA0655	10090	MGI:1352504
HK1	15275	hexokinase 1	Hk1	BB404130, Hk-1, Hk1-, Hk1-s, dea	10090	MGI:96103
HMGCS1	208715	3-hydroxy-3-methylglutaryl-Coenzyme A synthase 1	Hmgcs1	B130032C06Rik	10090	MGI:107592
HMOX2	15369	heme oxygenase 2	Hmox2	HO, HO-, HO-2, HO2	10090	MGI:109373
HNRNPA3	229279	heterogeneous nuclear ribonucleoprotein A3	Hnrnpa3	2410013L13Rik, 2610209F03Rik, 2610510D13Rik, Hn, Hnrpa3	10090	MGI:1917171
HNRNPK	15387	heterogeneous nuclear ribonucleoprotein K	Hnrnpk	Hnrpk, KBB, KBBP, NOVA, hn	10090	MGI:99894
HOOK3	320191	hook microtubule tethering protein 3	Hook3	5830454D03Rik, AI317159, E330005F07Rik	10090	MGI:2443554
HPCAL4	170638	hippocalcin-like 4	Hpcal4	AI846570, NVP-2	10090	MGI:2157521
HPRT1	15452	hypoxanthine guanine phosphoribosyl transferase	Hprt	C81579, HPGRT, Hpr, Hprt1	10090	MGI:96217
HSDL1	72552	hydroxysteroid dehydrogenase like 1	Hsdl1	2700067E09Rik	10090	MGI:1919802
HSP90AA1	15519	heat shock protein 90, alpha (cytosolic), class A member 1	Hsp90aa1	86kDa, 89kDa, AL024080, AL024147, Hsp	10090	MGI:96250
HSP90AB1	15516	heat shock protein 90 alpha (cytosolic), class B member 1	Hsp90ab1	90kDa, AL022974, C81438, Hsp, Hsp84	10090	MGI:96247
HSPA12A	73442	heat shock protein 12A	Hspa12a	1700063D12Rik, AI118035, AI840429, AW048913, AW556406	10090	MGI:1920692
HSPA1B	15511	heat shock protein 1B	Hspa1b	HSP70B1, Hsp70, Hsp70-1, Hsp70.1, hsp	10090	MGI:99517
HSPA2	15512	heat shock protein 2	Hspa2	70kD, 70kDa, HSP70.2, HSP70A2, Hsp70	10090	MGI:96243
HSPA4	15525	heat shock protein 4	Hspa4	70kD, 70kDa, AI317151, APG, APG-2	10090	MGI:1342292
HSPA4L	18415	heat shock protein 4 like	Hspa4l	94kD, 94kDa, AI461691, APG, APG-1	10090	MGI:107422
HSPA8	15481	heat shock protein 8	Hspa8	2410008N15Rik, Hsc7, Hsc70, Hsc71, Hsc73	10090	MGI:105384
HSPH1	15505	heat shock 105kDa/110kDa protein 1	Hsph1	105kDa, AI790491, HSP1, Hsp105, Hsp110	10090	MGI:105053
HTT	15194	huntingtin	Htt	AI256365, C430023I11Rik, Hd, Hdh, IT1	10090	MGI:96067
HUWE1	59026	HECT, UBA and WWE domain containing 1	Huwe1	5430439H10Rik, AU041296, Arf-, Arf-bp1, C430014N20Rik	10090	MGI:1926884
IDH2	269951	isocitrate dehydrogenase 2 (NADP+), mitochondrial	Idh2	E430004F23, ID, IDPm, Idh-, Idh-2	10090	MGI:96414
IGBP1	18518	immunoglobulin (CD79A) binding protein 1	Igbp1	AI115586, AI662457, AW208785, C81413, Pc5	10090	MGI:1346500
IGHMBP2	20589	immunoglobulin mu binding protein 2	Ighmbp2	A, AEP, Catf, Catf1, RIPE	10090	MGI:99954
IMMT	76614	inner membrane protein, mitochondrial	Immt	1700082C19Rik, D830041H16Rik, HM, HMP, Mico	10090	MGI:1923864
IMPACT	16210	impact, RWD domain protein	Impact	E430016J11Rik	10090	MGI:1098233
INPP1	16329	inositol polyphosphate-1-phosphatase	Inpp1	2300002C06Rik, AV137389	10090	MGI:104848
INPP4A	269180	inositol polyphosphate-4-phosphatase, type I	Inpp4a	107kD, 107kDa, 9630012D15, D130048C09Rik, R74740	10090	MGI:1931123
INPP5F	101490	inositol polyphosphate-5-phosphatase F	Inpp5f	5830435P03Rik, AI115354, AW561896, SA, SAC2	10090	MGI:2141867
INPP5K	19062	inositol polyphosphate 5-phosphatase K	Inpp5k	C62, Pps, SKIP	10090	MGI:1194899
IPO5	70572	importin 5	Ipo5	1110011C18Rik, 5730478E03Rik, AA409333, C76941, IMB	10090	MGI:1917822
IPO7	233726	importin 7	Ipo7	A330055O14Rik, C330016G14, Im, Imp7, Ra	10090	MGI:2152414
IPO9	226432	importin 9	Ipo9	0710008K06Rik, AI845704, C78347, Im, Imp9	10090	MGI:1918944
IQCB1	320299	IQ calmodulin-binding motif containing 1	Iqcb1	6820449I09Rik, AV128382, NP, NPHP5	10090	MGI:2443764
IQSEC1	232227	IQ motif and Sec7 domain 1	Iqsec1	AW561907, BC026481, BRA, BRAG2, D6Ertd349	10090	MGI:1196356
IRGQ	210146	immunity-related GTPase family, Q	Irgq	AF322649, FKSG2, FKSG27, Irgq1	10090	MGI:2667176
IST1	71955	increased sodium tolerance 1 homolog (yeast)	Ist1	2400003C14Rik, AW536298, mKIAA0174	10090	MGI:1919205
ISYNA1	71780	myo-inositol 1-phosphate synthase A1	Isyna1	1300017C10Rik, AU018670, IPS 1	10090	MGI:1919030
ITGA3	16400	integrin alpha 3	Itga3	AA407068, CD49C, GAPB3	10090	MGI:96602
ITSN1	16443	intersectin 1 (SH3 domain protein 1A)	Itsn1	AA517634, AA545208, AI316805, AI839402, AI848451	10090	MGI:1338069
JPT2	52009	Jupiter microtubule associated homolog 2	Jpt2	2810430B18Rik, AL022629, C16orf34, D17Ertd441, D17Ertd441e	10090	MGI:1196260
KANK4	242553	KN motif and ankyrin repeat domains 4	Kank4	AU021071, Ankr, Ankrd38, BC060737, C130031J23	10090	MGI:3043381
KATNAL1	231912	katanin p60 subunit A-like 1	Katnal1		10090	MGI:2387638
KATNB1	74187	katanin p80 (WD40-containing) subunit B 1	Katnb1	2410003J24Rik, KA, KAT	10090	MGI:1921437
KAZN	71529	kazrin, periplakin interacting protein	Kazn	2310007B04Rik, 9030409G11Rik, AI256607, AI666764, AW061099	10090	MGI:1918779
KBTBD11	74901	kelch repeat and BTB (POZ) domain containing 11	Kbtbd11	2900016B01Rik, 4930465M17Rik, mKIAA0711	10090	MGI:1922151
KCNA2	16490	potassium voltage-gated channel, shaker-related subfamily, member 2	Kcna2	Akr, Akr6a4, Gm10672, Kca1-, Kca1-2	10090	MGI:96659
KCNA4	16492	potassium voltage-gated channel, shaker-related subfamily, member 4	Kcna4	Kv1., Kv1.4	10090	MGI:96661
KCNA6	16494	potassium voltage-gated channel, shaker-related, subfamily, member 6	Kcna6	Kv1., Kv1.6, MK1.6	10090	MGI:96663
KCNAB2	16498	potassium voltage-gated channel, shaker-related subfamily, beta member 2	Kcnab2	F5, I2r, I2rf5, Kcnb, Kcnb3	10090	MGI:109239
KCND3	56543	potassium voltage-gated channel, Shal-related family, member 3	Kcnd3	AW045978, Kncd3, Kv4., Kv4.3	10090	MGI:1928743
KCNIP4	80334	Kv channel interacting protein 4	Kcnip4	AV032399, Calp, Calp250, KChI, KChIP4	10090	MGI:1933131
KCNJ6	16522	potassium inwardly-rectifying channel, subfamily J, member 6	Kcnj6	BIR1, GIR, GIRK2, KATP2, KCNJ	10090	MGI:104781
KCNMA1	16531	potassium large conductance calcium-activated channel, subfamily M, alpha member 1	Kcnma1	5730414M22Rik, BKC, BKCA alpha, BKCa, KCa1.1	10090	MGI:99923
KCNN3	140493	potassium intermediate/small conductance calcium-activated channel, subfamily N, member 3	Kcnn3	KCa2.3, SK, SK3, SKCA3	10090	MGI:2153183
KCNQ2	16536	potassium voltage-gated channel, subfamily Q, member 2	Kcnq2	HNSPC, KQT2, Nmf13, Nmf134	10090	MGI:1309503
KHDRBS1	20218	KH domain containing, RNA binding, signal transduction associated 1	Khdrbs1	Sam, Sam68, p6, p62, p68	10090	MGI:893579
KIF1A	16560	kinesin family member 1A	Kif1a	A, ATSV, C630002N23Rik, Gm1626, Kn	10090	MGI:108391
KIF21A	16564	kinesin family member 21A	Kif21a		10090	MGI:109188
KIF2A	16563	kinesin family member 2A	Kif2a	C530030B14Rik, Kif, Kif2, Kn, Kns2	10090	MGI:108390
KIF5A	16572	kinesin family member 5A	Kif5a	D10Bwg0738e, K, Khc, Kif, Kif5	10090	MGI:109564
KIF5B	16573	kinesin family member 5B	Kif5b	AL022807, Khc, Khcs, Kns1, Ukhc	10090	MGI:1098268
KIFAP3	16579	kinesin-associated protein 3	Kifap3	KA, KAP-3, KAP3, SMAP	10090	MGI:107566
KLC1	16593	kinesin light chain 1	Klc1	AI874768, Kn, Kns2	10090	MGI:107978
KLC2	16594	kinesin light chain 2	Klc2	8030455F02Rik, AW212649, KLC 2, KLC-2	10090	MGI:107953
KPNA1	16646	karyopherin (importin) alpha 1	Kpna1	AW494490, IPOA5, N, NPI1, Rch	10090	MGI:103560
KPNA3	16648	karyopherin (importin) alpha 3	Kpna3	I, IPOA4	10090	MGI:1100863
KPNA4	16649	karyopherin (importin) alpha 4	Kpna4	1110058D08Rik, IPOA3, qip1	10090	MGI:1100848
KPNA6	16650	karyopherin (importin) alpha 6	Kpna6	I, IPOA7, Kpna5, NP, NPI-2	10090	MGI:1100836
L1CAM	16728	L1 cell adhesion molecule	L1cam	CD171, L, L1, L1-N, N-CAM-L1	10090	MGI:96721
LAMTOR1	66508	late endosomal/lysosomal adaptor, MAPK and MTOR activator 1	Lamtor1	2400001E08Rik, Pdro, p1, p18	10090	MGI:1913758
LAMTOR3	56692	late endosomal/lysosomal adaptor, MAPK and MTOR activator 3	Lamtor3	AW556229, Map, Map2k, Map2k1ip1, Mapbp	10090	MGI:1929467
LANCL2	71835	LanC (bacterial lantibiotic synthetase component C)-like 2	Lancl2	1700003F10Rik	10090	MGI:1919085
LARP1	73158	La ribonucleoprotein domain family, member 1	Larp1	1810024J12Rik, 3110040D16Rik, Larp, mKIAA0731	10090	MGI:1890165
LASP1	16796	LIM and SH3 protein 1	Lasp1	AA408629, Def-4, LASP-1, MLN 50, SH3	10090	MGI:109656
LDHA	16828	lactate dehydrogenase A	Ldha	LDH, Ldh-, Ldh1, Ldhm, l7	10090	MGI:96759
LDHB	16832	lactate dehydrogenase B	Ldhb	AI790582, H-Ld, H-Ldh, LDH-B, LDH-H	10090	MGI:96763
LIN7A	108030	lin-7 homolog A (C. elegans)	Lin7a	AI848705, LI, LIN-7A, MAL, MALS-1	10090	MGI:2135609
LIN7B	22342	lin-7 homolog B (C. elegans)	Lin7b	LIN, LIN-7B, MAL, MALS-2, Ve	10090	MGI:1330858
LMBRD2	320506	LMBR1 domain containing 2	Lmbrd2	9930036E21Rik	10090	MGI:2444173
LPCAT1	210992	lysophosphatidylcholine acyltransferase 1	Lpcat1	2900035H07Rik, Ayt, Aytl2, BB137372, BC005662	10090	MGI:2384812
LRRC47	72946	leucine rich repeat containing 47	Lrrc47	2900010D03Rik, AA960559, mKIAA1185	10090	MGI:1920196
LRRC57	66606	leucine rich repeat containing 57	Lrrc57	2810002D13Rik, AA407405	10090	MGI:1913856
LRSAM1	227738	leucine rich repeat and sterile alpha motif containing 1	Lrsam1		10090	MGI:2684789
LSM12	268490	LSM12 homolog	Lsm12	1110032E16Rik, 1110059P07, 2600001B17Rik	10090	MGI:1919592
LSM3	67678	LSM3 homolog, U6 small nuclear RNA and mRNA degradation associated	Lsm3	1010001J12Rik, 2610005D18Rik, 6030401D18Rik, SMX, SMX4	10090	MGI:1914928
LTA4H	16993	leukotriene A4 hydrolase	Lta4h		10090	MGI:96836
LYSMD2	70082	LysM, putative peptidoglycan-binding, domain containing 2	Lysmd2	2210402C18Rik, AV033872, AW538442	10090	MGI:1917332
LYST	17101	lysosomal trafficking regulator	Lyst	D13Sfk1, D13Sfk13, beige, bg	10090	MGI:107448
M6PR	17113	mannose-6-phosphate receptor, cation dependent	M6pr	CD-M, CD-MPR, Mpr, Mpr46	10090	MGI:96904
MACROD2	72899	mono-ADP ribosylhydrolase 2	Macrod2	1110033L15Rik, 2610107G07Rik, 2900006F19Rik	10090	MGI:1920149
MAD1L1	17120	MAD1 mitotic arrest deficient 1-like 1	Mad1l1	AI173502, AW550425, Mad, Mad1	10090	MGI:1341857
MADD	228355	MAP-kinase activating death domain	Madd	9630059K23Rik, IG20	10090	MGI:2444672
MAGED1	94275	MAGE family member D1	Maged1	2810433C11Rik, 5430405L04Rik, DXBwg1492e, Dlixin, Dlxi	10090	MGI:1930187
MAGI1	14924	membrane associated guanylate kinase, WW and PDZ domain containing 1	Magi1	A, AIP3, BAP1, Ba, Baiap1	10090	MGI:1203522
MAGI2	50791	membrane associated guanylate kinase, WW and PDZ domain containing 2	Magi2	AIP-1, Ac, Acvri1, Acvrinp1, Acvrip1	10090	MGI:1354953
MAGI3	99470	membrane associated guanylate kinase, WW and PDZ domain containing 3	Magi3	4732496O19Rik, 6530407C02Rik, AA407180, AI120132, mKIAA1634	10090	MGI:1923484
MAN2C1	73744	mannosidase, alpha, class 2C, member 1	Man2c1	1110025H24Rik	10090	MGI:1920994
MAOA	17161	monoamine oxidase A	Maoa	1110061B18Rik, AA407771, MA	10090	MGI:96915
MAOB	109731	monoamine oxidase B	Maob	6330414K01Rik, MAO, MAO-B	10090	MGI:96916
MAP1A	17754	microtubule-associated protein 1 A	Map1a	6330416M19Rik, AI853608, Mta, Mtap, Mtap-1	10090	MGI:1306776
MAP1B	17755	microtubule-associated protein 1B	Map1b	A230055D22, AI843217, LC, LC1, MA	10090	MGI:1306778
MAP1LC3A	66734	microtubule-associated protein 1 light chain 3 alpha	Map1lc3a	1010001H21Rik, 4922501H04Rik, LC, LC3, LC3a	10090	MGI:1915661
MAP1S	270058	microtubule-associated protein 1S	Map1s	6430517J16Rik, Bpy2, Bpy2ip1, Ma, Map8	10090	MGI:2443304
MAP2	17756	microtubule-associated protein 2	Map2	G1-397-34, MAP, MAP-2, Mta, Mtap-2	10090	MGI:97175
MAP2K1	26395	mitogen-activated protein kinase kinase 1	Map2k1	MAPKK1, MEKK1, Mek1, Prkm, Prkmk1	10090	MGI:1346866
MAP2K4	26398	mitogen-activated protein kinase kinase 4	Map2k4	JNKK, JNKK1, MAPKK 4, MEK4, MKK4	10090	MGI:1346869
MAP4	17758	microtubule-associated protein 4	Map4	AA407148, MAP-4, Mta, Mtap-4, Mtap4	10090	MGI:97178
MAP6	17760	microtubule-associated protein 6	Map6	2810411E12Rik, F-S, Map-6, Mta, Mtap6	10090	MGI:1201690
MAP7D1	245877	MAP7 domain containing 1	Map7d1	AV028413, BC019977, Mtap7, Mtap7d1, Par	10090	MGI:2384297
MAP7D2	78283	MAP7 domain containing 2	Map7d2	1600028E09Rik, 2900002G04Rik, 5330432J06Rik, C030036K04Rik, Mtap7	10090	MGI:1917474
MAPK1	26413	mitogen-activated protein kinase 1	Mapk1	9030612K14Rik, AA407128, AU018647, C78273, ERK	10090	MGI:1346858
MAPK10	26414	mitogen-activated protein kinase 10	Mapk10	C230008H04Rik, JNK, JNK3, JNK3B1, JNK3B2	10090	MGI:1346863
MAPK1IP1L	218975	mitogen-activated protein kinase 1 interacting protein 1-like	Mapk1ip1l	9130202B12, C130032J12Rik	10090	MGI:2444022
MAPK3	26417	mitogen-activated protein kinase 3	Mapk3	Erk, Erk-, Erk-1, Erk1, Ert2	10090	MGI:1346859
MAPK8	26419	mitogen-activated protein kinase 8	Mapk8	AI849689, JNK, JNK1, Prk, Prkm8	10090	MGI:1346861
MAPK8IP1	19099	mitogen-activated protein kinase 8 interacting protein 1	Mapk8ip1	IB, IB1, JIP, JIP-1, Ji	10090	MGI:1309464
MAPK8IP3	30957	mitogen-activated protein kinase 8 interacting protein 3	Mapk8ip3	BB120594, D17Wsu15, D17Wsu15e, JIP-3, JS	10090	MGI:1353598
MAPRE2	212307	microtubule-associated protein, RP/EB family, member 2	Mapre2	AI314113, C820009F03Rik, D18Abb1, D18Abb1e, EB1	10090	MGI:106271
MAPRE3	100732	microtubule-associated protein, RP/EB family, member 3	Mapre3	AI790651, EB2, EB3, EBF3, RP3	10090	MGI:2140967
MAPT	17762	microtubule-associated protein tau	Mapt	AI413597, AW045860, Mta, Mtapt, Ta	10090	MGI:97180
MARCHF5	69104	membrane associated ring-CH-type finger 5	Marchf5	1810015H18Rik, 2310008I22Rik, 2700055A20Rik, 5730499H23Rik, E130202O05Rik	10090	MGI:1915207
MARCKS	17118	myristoylated alanine rich protein kinase C substrate	Marcks	Ma, Macs, PKCSL	10090	MGI:96907
MARK1	226778	MAP/microtubule affinity regulating kinase 1	Mark1	AW491150, B930025N23Rik, Emk3, Par-1c, mKIAA1477	10090	MGI:2664902
MARK2	13728	MAP/microtubule affinity regulating kinase 2	Mark2	EMK-1, Emk, Pa, Par-1, Par-1b	10090	MGI:99638
MARK3	17169	MAP/microtubule affinity regulating kinase 3	Mark3	1600015G02Rik, A430080F22Rik, C-TAK, C-TAK1, ETK-1	10090	MGI:1341865
MAST1	56527	microtubule associated serine/threonine kinase 1	Mast1	9430008B02Rik, S, SAST, SAST170	10090	MGI:1861901
MAT2A	232087	methionine adenosyltransferase II, alpha	Mat2a	D630045P18Rik, MAT 2	10090	MGI:2443731
MDP1	67881	magnesium-dependent phosphatase 1	Mdp1	1810034K20Rik, AI035604	10090	MGI:1915131
ME3	109264	malic enzyme 3, NADP(+)-dependent, mitochondrial	Me3	1700020C08Rik, B230207H15Rik	10090	MGI:1916679
MEA1	17256	male enhanced antigen 1	Mea1	Mea-, Mea-1	10090	MGI:96957
MFF	75734	mitochondrial fission factor	Mff	5230400G24Rik, AI314724	10090	MGI:1922984
MFN2	170731	mitofusin 2	Mfn2	D630023P19Rik, Fz, Fzo	10090	MGI:2442230
MFSD6	98682	major facilitator superfamily domain containing 6	Mfsd6	2210010L05Rik, 9630025I22Rik, AI836200, AW212394, MMR	10090	MGI:1922925
MGRN1	17237	mahogunin, ring finger 1	Mgrn1	2610042J20Rik, mKIAA0544, md, n, nc	10090	MGI:2447670
MGST3	66447	microsomal glutathione S-transferase 3	Mgst3	2010012L10Rik, 2010306B17Rik, 2700004G04Rik, AA516734, GST	10090	MGI:1913697
MIF	17319	macrophage migration inhibitory factor (glycosylation-inhibiting factor)	Mif	DER6, GIF, Gl, Glif	10090	MGI:96982
MINDY2	235461	MINDY lysine 48 deubiquitinase 2	Mindy2	AI465301, B230380D07Rik, Fam63, Fam63b, mKIAA1164	10090	MGI:2443086
MMS19	72199	MMS19 cytosolic iron-sulfur assembly component	Mms19	2410001K24Rik, 2610042O15Rik, AI316855, C79368, C86341	10090	MGI:1919449
MPHOSPH10	67973	M-phase phosphoprotein 10 (U3 small nucleolar ribonucleoprotein)	Mphosph10	2810453H10Rik, 5730405D16Rik, AI326008	10090	MGI:1915223
MPI	110119	mannose phosphate isomerase	Mpi	1110002E17Rik, AI315153, Mp, Mpi-1, Mpi1	10090	MGI:97075
MPP1	17524	membrane protein, palmitoylated	Mpp1	55kD, 55kDa, C130070C03Rik, p5, p55	10090	MGI:105941
MSRA	110265	methionine sulfoxide reductase A	Msra	2310045J23Rik, 6530413P12Rik, MS, MSR-A	10090	MGI:106916
MTAP	66902	methylthioadenosine phosphorylase	Mtap	1300019I21Rik, MSAP	10090	MGI:1914152
MTARC2	67247	mitochondrial amidoxime reducing component 2	Mtarc2	2810484M10Rik, Mar, Marc2, Mos, Mosc2	10090	MGI:1914497
MTCH1	56462	mitochondrial carrier 1	Mtch1	2310034O17Rik, AI255158, AU018396, C77849, PSAP	10090	MGI:1929261
MTCH2	56428	mitochondrial carrier 2	Mtch2	2310034D24Rik, 4930539J07Rik, HSPC0, HSPC032	10090	MGI:1929260
MTFR1L	76824	mitochondrial fission regulator 1-like	Mtfr1l	2410166I05Rik, AI480750, Fam54, Fam54b	10090	MGI:1924074
MTHFD1	108156	methylenetetrahydrofolate dehydrogenase (NADP+ dependent), methenyltetrahydrofolate cyclohydrolase, formyltetrahydrofolate synthase	Mthfd1	DC, Dcs, E430024A07Rik, Mthfd	10090	MGI:1342005
MTMR1	53332	myotubularin related protein 1	Mtmr1	AW049210	10090	MGI:1858271
MTMR6	219135	myotubularin related protein 6	Mtmr6	4022440C11Rik, AI428804, AU041072	10090	MGI:2145637
MTMR7	54384	myotubularin related protein 7	Mtmr7		10090	MGI:1891693
MTOR	56717	mechanistic target of rapamycin kinase	Mtor	2610315D21Rik, AI327068, FRAP, FRAP2, Fr	10090	MGI:1928394
MTSS2	244654	MTSS I-BAR domain containing 2	Mtss2	AB, ABBA, Mts, Mtss1l	10090	MGI:3039591
MTX1	17827	metaxin 1	Mtx1	Gca, Gcap6, Mtx	10090	MGI:103025
MYCBP2	105689	MYC binding protein 2, E3 ubiquitin protein ligase	Mycbp2	AU023734, AW107953, AW546647, C130061D10Rik, P	10090	MGI:2179432
MYH10	77579	myosin, heavy polypeptide 10, non-muscle	Myh10	5730504C04Rik, 9330167F11Rik, Fl, Fltn, Myhn	10090	MGI:1930780
MYRIP	245049	myosin VIIA and Rab interacting protein	Myrip	A230081N12Rik, Slac, Slac2-c, Slac2c	10090	MGI:2384407
NANS	94181	N-acetylneuraminic acid synthase (sialic acid synthase)	Nans	4632418E04Rik, BB056474, Sas	10090	MGI:2149820
NAP1L1	53605	nucleosome assembly protein 1-like 1	Nap1l1	AA407126, AI256722, D10Ertd68, D10Ertd68e, NAP-1	10090	MGI:1855693
NAP1L4	17955	nucleosome assembly protein 1-like 4	Nap1l4	2810410H14Rik, AI316776, D7Wsu30, D7Wsu30e, N	10090	MGI:1316687
NAPA	108124	N-ethylmaleimide sensitive fusion protein attachment protein alpha	Napa	1500039N14Rik, AW209189, RA, RA81, S	10090	MGI:104563
NAPB	17957	N-ethylmaleimide sensitive fusion protein attachment protein beta	Napb	Brp, Brp14, E161, I4, I47	10090	MGI:104562
NAPG	108123	N-ethylmaleimide sensitive fusion protein attachment protein gamma	Napg	2400003O04Rik, S, SNARE	10090	MGI:104561
NARS1	70223	asparaginyl-tRNA synthetase	Nars	3010001M15Rik, AA960128, ASNRS, C78150, NARS1	10090	MGI:1917473
NAV1	215690	neuron navigator 1	Nav1	9530089B19, 9930003A20Rik, C230080M11Rik, Gm38399, POM	10090	MGI:2183683
NBEA	26422	neurobeachin	Nbea	Lyst2, mKIAA1544	10090	MGI:1347075
NCDN	26562	neurochondrin	Ncdn	AU042419, MMS10-AE, Ms10ae, mKIAA0607, n	10090	MGI:1347351
NCK1	17973	non-catalytic region of tyrosine kinase adaptor protein 1	Nck1	6330586M15Rik, D230010O13Rik, Nc, Nck, Nck-1	10090	MGI:109601
NCKAP1	50884	NCK-associated protein 1	Nckap1	C79304, H19, Hem-2, Hem2, N	10090	MGI:1355333
NCKIPSD	80987	NCK interacting protein with SH3 domain	Nckipsd	AF3P, AF3P21, DI, DIP1, ORF1	10090	MGI:1931834
NCOA7	211329	nuclear receptor coactivator 7	Ncoa7	9030406N13Rik	10090	MGI:2444847
NCS1	14299	neuronal calcium sensor 1	Ncs1	9430075O15Rik, A730032G13Rik, AI836659, Fre, Freq	10090	MGI:109166
NDRG3	29812	N-myc downstream regulated gene 3	Ndrg3	4833415O14Rik, AI747193, Nd, Ndr3	10090	MGI:1352499
NDRG4	234593	N-myc downstream regulated gene 4	Ndrg4	D8Bwg1337e, Nd, Ndr, Ndr1-rs, Ndr4	10090	MGI:2384590
NDUFA10	67273	NADH:ubiquinone oxidoreductase subunit A10	Ndufa10	2900053E13Rik	10090	MGI:1914523
NDUFA8	68375	NADH:ubiquinone oxidoreductase subunit A8	Ndufa8	0610033L03Rik, AW261656, CI-19kD, CI-PGIV	10090	MGI:1915625
NDUFB10	68342	NADH:ubiquinone oxidoreductase subunit B10	Ndufb10	0610011B04Rik, 22kD, 22kDa, PDSW	10090	MGI:1915592
NDUFB11	104130	NADH:ubiquinone oxidoreductase subunit B11	Ndufb11	CI-ESSS, D5Bwg0566e, D5Bwg0577e, NP15.6, Np	10090	MGI:1349919
NDUFV1	17995	NADH:ubiquinone oxidoreductase core subunit V1	Ndufv1	CI-51kD	10090	MGI:107851
NDUFV2	72900	NADH:ubiquinone oxidoreductase core subunit V2	Ndufv2	2900010C23Rik	10090	MGI:1920150
NEBL	74103	nebulette	Nebl	1200007O21Rik, A630080F05Rik, BB140644, D830029A09Rik, Ln	10090	MGI:1921353
NECAP1	67602	NECAP endocytosis associated 1	Necap1	1200016B17Rik, AI747569	10090	MGI:1914852
NECTIN1	58235	nectin cell adhesion molecule 1	Nectin1	AI835281, AW549174, Cd111, HI, HIgR	10090	MGI:1926483
NECTIN3	58998	nectin cell adhesion molecule 3	Nectin3	2610301B19Rik, 3000002N23Rik, 4921513D19Rik, AA407785, AU016832	10090	MGI:1930171
NEDD4	17999	neural precursor cell expressed, developmentally down-regulated 4	Nedd4	AA959633, AL023035, AU019897, E430025J12Rik, EG639396	10090	MGI:97297
NEO1	18007	neogenin	Neo1	2610028H22Rik, AI327052, D930014N22Rik, Igdcc, Igdcc2	10090	MGI:1097159
NF1	18015	neurofibromin 1	Nf1	AW494271, Dsk, Dsk9, E030030H24Rik, Mhdads	10090	MGI:97306
NFASC	269116	neurofascin	Nfasc	AA387016, D430023G06Rik, NF, mKIAA0756	10090	MGI:104753
NISCH	64652	nischarin	Nisch	1200007D05Rik, 3202002H23Rik, AW494485, I-1, ed	10090	MGI:1928323
NLGN1	192167	neuroligin 1	Nlgn1	6330415N05Rik, BB179718, N, NL1, Nl	10090	MGI:2179435
NPEPPS	19155	aminopeptidase puromycin sensitive	Npepps	AAP-S, MP10, MP100, Psa, R74825	10090	MGI:1101358
NPTN	20320	neuroplastin	Nptn	AW554172, SDR-1, Sdf, Sdfr1	10090	MGI:108077
NQO2	18105	N-ribosyldihydronicotinamide quinone reductase 2	Nqo2	NMO2, Nm, Nmor2, Ox, Ox-	10090	MGI:104513
NRBP2	223649	nuclear receptor binding protein 2	Nrbp2	BC011468	10090	MGI:2385017
NRXN1	18189	neurexin I	Nrxn1	1700062G21Rik, 9330127H16Rik, A230068P09Rik, mKIAA0578	10090	MGI:1096391
NRXN2	18190	neurexin II	Nrxn2	6430591O13Rik, mKIAA0921	10090	MGI:1096362
NRXN3	18191	neurexin III	Nrxn3		10090	MGI:1096389
NSF	18195	N-ethylmaleimide sensitive fusion protein	Nsf	AI316878, AU020090, AU067812, SKD, SKD2	10090	MGI:104560
NSFL1C	386649	NSFL1 (p97) cofactor (p47)	Nsfl1c	Munc-18c, Stxbp3a, p4, p47	10090	MGI:3042273
NT5C2	76952	5'-nucleotidase, cytosolic II	Nt5c2	2010002I23Rik, CnII, Gm9751, Gmp, NT5	10090	MGI:2178563
NTSR1	18216	neurotensin receptor 1	Ntsr1	NT-, NT-1R, NTR, NTR-1, NTR1	10090	MGI:97386
NUDCD1	67429	NudC domain containing 1	Nudcd1	4921532K09Rik, AA407246, AW260430, AW556235, CML66-L	10090	MGI:1914679
NUDT3	56409	nudix (nucleotide diphosphate linked moiety X)-type motif 3	Nudt3	1110011B09Rik, AA960325, D, Dipp, Dipp1	10090	MGI:1928484
NUMB	18222	NUMB endocytic adaptor protein	Numb	Nb, m-num	10090	MGI:107423
NUMBL	18223	numb-like	Numbl	n, nbl	10090	MGI:894702
NYAP1	243300	neuronal tyrosine-phosphorylated phosphoinositide 3-kinase adaptor 1	Nyap1	6430598A04Rik, Ny	10090	MGI:2443880
NYAP2	241134	neuronal tyrosine-phophorylated phosphoinositide 3-kinase adaptor 2	Nyap2	9430031J16Rik, Jr, Jr6, Kiaa1486	10090	MGI:2443135
OCIAD1	68095	OCIA domain containing 1	Ociad1	6030432N09Rik, A, AI481327, AW557942, Asrij	10090	MGI:1915345
OCRL	320634	OCRL, inositol polyphosphate-5-phosphatase	Ocrl	9530014D17Rik, BB143339, OC, OCRL1	10090	MGI:109589
OGA	76055	O-GlcNAcase	Oga	Hy5, Mgea, Mgea5, Ncoat	10090	MGI:1932139
OGDH	18293	oxoglutarate (alpha-ketoglutarate) dehydrogenase (lipoamide)	Ogdh	2210403E04Rik, 2210412K19Rik, AA409584, d1401, mKIAA4192	10090	MGI:1098267
OGT	108155	O-linked N-acetylglucosamine (GlcNAc) transferase (UDP-N-acetylglucosamine:polypeptide-N-acetylglucosaminyl transferase)	Ogt	1110038P24Rik, 4831420N21Rik, AI115525, OG, Ogtl	10090	MGI:1339639
OLA1	67059	Obg-like ATPase 1	Ola1	2510025G09Rik, 2810405J23Rik, 2810409H07Rik, Gtpb, Gtpbp9	10090	MGI:1914309
OPA1	74143	OPA1, mitochondrial dynamin like GTPase	Opa1	1200011N24Rik, AI225888, AI847218, l, lilr3	10090	MGI:1921393
OSBP	76303	oxysterol binding protein	Osbp	1110018F06Rik, AW559088, mKIAA4220	10090	MGI:97447
OSBPL1A	64291	oxysterol binding protein-like 1A	Osbpl1a	G430090F17Rik, Gm753, ORP-1, Osbpl1b	10090	MGI:1927551
OSBPL8	237542	oxysterol binding protein-like 8	Osbpl8	AA536976, AA536995, C730029P18Rik, D330025H14Rik, OR	10090	MGI:2443807
OTUB1	107260	OTU domain, ubiquitin aldehyde binding 1	Otub1	AI850305	10090	MGI:2147616
OXR1	170719	oxidation resistance 1	Oxr1	2210416C20Rik, C7, C7B	10090	MGI:2179326
PABPC1	18458	poly(A) binding protein, cytoplasmic 1	Pabpc1	PABP, Pa, Pabp1, PabpI, Pabpl1	10090	MGI:1349722
PACS1	107975	phosphofurin acidic cluster sorting protein 1	Pacs1	AI325977	10090	MGI:1277113
PACS2	217893	phosphofurin acidic cluster sorting protein 2	Pacs2	6720425G15Rik, AW208651, AW489976, E230011J22, Pa	10090	MGI:1924399
PACSIN1	23969	protein kinase C and casein kinase substrate in neurons 1	Pacsin1	A830061D09Rik, H74, mKIAA1379, syndapin	10090	MGI:1345181
PACSIN2	23970	protein kinase C and casein kinase substrate in neurons 2	Pacsin2	AI197433, SdpII	10090	MGI:1345153
PAFAH1B1	18472	platelet-activating factor acetylhydrolase, isoform 1b, subunit 1	Pafah1b1	L, LI, LIS-1, Lis1, MMS10-U	10090	MGI:109520
PAFAH1B3	18476	platelet-activating factor acetylhydrolase, isoform 1b, subunit 3	Pafah1b3	Paf, Pafahg, mus[g, mus[g]	10090	MGI:108414
PAIP1	218693	polyadenylate binding protein-interacting protein 1	Paip1	PAIP-1	10090	MGI:2384993
PAK1	18479	p21 (RAC1) activated kinase 1	Pak1	AW045634, P, PAK, PAK-1, Paka	10090	MGI:1339975
PAK3	18481	p21 (RAC1) activated kinase 3	Pak3	PAK, PAK-3, Pak65alpha, Pak65beta, Stk4	10090	MGI:1339656
PALM	18483	paralemmin	Palm		10090	MGI:1261814
PALMD	114301	palmdelphin	Palmd	4631423C22Rik, P, PALML	10090	MGI:2148896
PARK7	57320	Parkinson disease (autosomal recessive, early onset) 7	Park7	DJ-1, Dj1	10090	MGI:2135637
PBDC1	67683	polysaccharide biosynthesis domain containing 1	Pbdc1	2610029G23Rik	10090	MGI:1914933
PCBP1	23983	poly(rC) binding protein 1	Pcbp1	WBP1, WBP17, [a]CP, [a]CP-1, alphaCP-1	10090	MGI:1345635
PCBP2	18521	poly(rC) binding protein 2	Pcbp2	AW412548, Hn, Hnrpx, alph, alphaCP-2	10090	MGI:108202
PCLO	26875	piccolo (presynaptic cytomatrix protein)	Pclo	Ac, Acz, P, Pico	10090	MGI:1349390
PCMT1	18537	protein-L-isoaspartate (D-aspartate) O-methyltransferase 1	Pcmt1	C79501, PI, PIMT	10090	MGI:97502
PCYT2	68671	phosphate cytidylyltransferase 2, ethanolamine	Pcyt2	1110033E03Rik, ET	10090	MGI:1915921
PDAP1	231887	PDGFA associated protein 1	Pdap1	HAS, HASPP28, P, PAP, PAP1	10090	MGI:2448536
PDCD6	18570	programmed cell death 6	Pdcd6	AV299538, Al, Alg2, MA-, MA-3	10090	MGI:109283
PDCD6IP	18571	programmed cell death 6 interacting protein	Pdcd6ip	A, AI480591, AW544830, Aip1, Alix	10090	MGI:1333753
PDE1B	18574	phosphodiesterase 1B, Ca2+-calmodulin dependent	Pde1b	Pde1b1	10090	MGI:97523
PDE2A	207728	phosphodiesterase 2A, cGMP-stimulated	Pde2a	CGS-PDE, cGSPDE	10090	MGI:2446107
PDE4D	238871	phosphodiesterase 4D, cAMP specific	Pde4d	9630011N22Rik, Dpde, Dpde3, dunc	10090	MGI:99555
PDLIM5	56376	PDZ and LIM domain 5	Pdlim5	1110001A05Rik, AI987914, C87059, En, Enh	10090	MGI:1927489
PDPK1	18607	3-phosphoinositide dependent protein kinase 1	Pdpk1	Pdk, Pdk1	10090	MGI:1338068
PDZD8	107368	PDZ domain containing 8	Pdzd8	A630041P07Rik, AV329468, AW228944, Pdzk, Pdzk8	10090	MGI:2677270
PEA15	18611	phosphoprotein enriched in astrocytes 15A	Pea15a	Mat, Mat1, PEA-, PEA-15, Pea	10090	MGI:104799
PEBP1	23980	phosphatidylethanolamine binding protein 1	Pebp1	HCNP, P, Pb, Pbp, Pbp1	10090	MGI:1344408
PEF1	67898	penta-EF hand domain containing 1	Pef1	2600002E23Rik, Peflin	10090	MGI:1915148
PEX14	56273	peroxisomal biogenesis factor 14	Pex14	Pex1, Pex14p, R75137	10090	MGI:1927868
PEX5	19305	peroxisomal biogenesis factor 5	Pex5	AW212715, ESTM, ESTM1, PT, PTS1-BP	10090	MGI:1098808
PEX5L	58869	peroxisomal biogenesis factor 5-like	Pex5l	1700016J08Rik, PX, PXR2, Pex, Pex2	10090	MGI:1916672
PFDN6	14976	prefoldin subunit 6	Pfdn6	H-2Ke2, H2-Ke2, Ke-2	10090	MGI:95908
PFKFB2	18640	6-phosphofructo-2-kinase/fructose-2,6-biphosphatase 2	Pfkfb2	4930568D07Rik	10090	MGI:107815
PFKP	56421	phosphofructokinase, platelet	Pfkp	1200015H23Rik, 9330125N24Rik, ATP-PFK, PFK-, PFK-C	10090	MGI:1891833
PFN1	18643	profilin 1	Pfn1	P, Pfn	10090	MGI:97549
PFN2	18645	profilin 2	Pfn2	P, Pfn	10090	MGI:97550
PGAM1	18648	phosphoglycerate mutase 1	Pgam1	2310050F24Rik, Pgam, Pgam-1	10090	MGI:97552
PGD	110208	phosphogluconate dehydrogenase	Pgd	0610042A05Rik, AU019875, C78335	10090	MGI:97553
PGK1	18655	phosphoglycerate kinase 1	Pgk1	Pgk-, Pgk-1	10090	MGI:97555
PGM2L1	70974	phosphoglucomutase 2-like 1	Pgm2l1	4931406N15Rik, AI553438, BM32, BM32A	10090	MGI:1918224
PHF24	230085	PHD finger protein 24	Phf24	G, GINIP, N2817, N28178	10090	MGI:2140712
PHPT1	75454	phosphohistidine phosphatase 1	Phpt1	1700008C22Rik, PHP, Php14	10090	MGI:1922704
PHYHIP	105653	phytanoyl-CoA hydroxylase interacting protein	Phyhip	AW049870, C630010D02Rik, Lnap1ip, PAHX, PAHX-	10090	MGI:1860417
PHYHIPL	70911	phytanoyl-CoA hydroxylase interacting protein-like	Phyhipl	4921522K17Rik, AI267048	10090	MGI:1918161
PI4K2A	84095	phosphatidylinositol 4-kinase type 2 alpha	Pi4k2a	Pi4k2	10090	MGI:1934031
PI4KA	224020	phosphatidylinositol 4-kinase alpha	Pi4ka	Pik, Pik4ca	10090	MGI:2448506
PI4KB	107650	phosphatidylinositol 4-kinase beta	Pi4kb	ESTM4, ESTM41, PI4K-beta, PI4Kbeta, Pik4	10090	MGI:1334433
PICALM	233489	phosphatidylinositol binding clathrin assembly protein	Picalm	CALM, CLTH, PAP180, fit, fit-	10090	MGI:2385902
PICK1	18693	protein interacting with C kinase 1	Pick1	Prk, Prkcabp	10090	MGI:894645
PIDD1	57913	p53 induced death domain protein 1	Pidd1	1200011D09Rik, AU042446, Lr, Lrdd, Pi	10090	MGI:1889507
PIK3R4	75669	phosphoinositide-3-kinase regulatory subunit 4	Pik3r4	2210010O15Rik, C730038E05Rik, C85833, D9Ertd418e, Vp	10090	MGI:1922919
PIP4K2B	108083	phosphatidylinositol-5-phosphate 4-kinase, type II, beta	Pip4k2b	AI848124, PI5P4K, PI5P4Kbeta, Pip5, Pip5k2b	10090	MGI:1934234
PIP4K2C	117150	phosphatidylinositol-5-phosphate 4-kinase, type II, gamma	Pip4k2c	Pip5, Pip5k2c	10090	MGI:2152214
PIP5K1C	18717	phosphatidylinositol-4-phosphate 5-kinase, type 1 gamma	Pip5k1c	AI115456, AI835305, PIP5K, Pip5kIgamma	10090	MGI:1298224
PITHD1	66193	PITH (C-terminal proteasome-interacting domain of thioredoxin-like) domain containing 1	Pithd1	1110049F12Rik, AA408179, Trp26	10090	MGI:1913443
PITPNA	18738	phosphatidylinositol transfer protein, alpha	Pitpna	P, Pitpn, vb, vibrator	10090	MGI:99887
PITPNM1	18739	phosphatidylinositol transfer protein, membrane-associated 1	Pitpnm1	DRE, DRES9, Mpt-1, Nir-2, PITPnm 1	10090	MGI:1197524
PITPNM2	19679	phosphatidylinositol transfer protein, membrane-associated 2	Pitpnm2	N, NIR3, RDGBA2, Rdgb, Rdgb2	10090	MGI:1336192
PKM	18746	pyruvate kinase, muscle	Pkm	AA414905, AL024370, AL024424, Pk, Pk-	10090	MGI:97591
PLAA	18786	phospholipase A2, activating protein	Plaa	2410007N06, AI536418, AU018445, AW208417, D4Ertd618	10090	MGI:104810
PLCB1	18795	phospholipase C, beta 1	Plcb1	3110043I21Rik, AI132408, Plcb, mKIAA0581	10090	MGI:97613
PLPPR3	216152	phospholipid phosphatase related 3	Plppr3	L, Lppr3, Prg2	10090	MGI:2388640
PLPPR4	229791	phospholipid phosphatase related 4	Plppr4	A330086D10, D3Bwg0562e, L, Lppr4, PRG	10090	MGI:106530
PLS3	102866	plastin 3 (T-isoform)	Pls3	AI115446, AL024105, T-fim	10090	MGI:104807
PLXNA1	18844	plexin A1	Plxna1	2600013D04Rik, NOV, Pl, Ple, PlexA1	10090	MGI:107685
PLXNA4	243743	plexin A4	Plxna4	9330117B14, Pl, Plxa4, mKIAA1550	10090	MGI:2179061
PNPO	103711	pyridoxine 5'-phosphate oxidase	Pnpo	AI415282	10090	MGI:2144151
POR	18984	cytochrome p450 oxidoreductase	Por	4933424M13Rik, C, CPR, CY, CYPOR	10090	MGI:97744
PPA1	67895	pyrophosphatase (inorganic) 1	Ppa1	2010317E03Rik, P, Pyp	10090	MGI:97831
PPFIA2	327814	protein tyrosine phosphatase, receptor type, f polypeptide (PTPRF), interacting protein (liprin), alpha 2	Ppfia2	5330438O12, B230207K17Rik, E130120L08Rik, mKIAA4112	10090	MGI:2443834
PPFIA3	76787	protein tyrosine phosphatase, receptor type, f polypeptide (PTPRF), interacting protein (liprin), alpha 3	Ppfia3	2410127E16Rik	10090	MGI:1924037
PPIA	268373	peptidylprolyl isomerase A	Ppia	Cp, Cphn, Cy, CyP-1, CyP-18	10090	MGI:97749
PPIP5K1	327655	diphosphoinositol pentakisphosphate kinase 1	Ppip5k1	B430315C20Rik, His, Hisppd2a, mKIAA0377	10090	MGI:2443281
PPM1A	19042	protein phosphatase 1A, magnesium dependent, alpha isoform	Ppm1a	2310003C21Rik, 2900017D14Rik, AI427932, AU017636, MMPa	10090	MGI:99878
PPM1E	320472	protein phosphatase 1E (PP2C domain containing)	Ppm1e	AW049266, B930008A12Rik, PO, POPX1, PP2	10090	MGI:2444096
PPM1H	319468	protein phosphatase 1H (PP2C domain containing)	Ppm1h	A430075L18Rik, ARH, ARHCL1, C030002B11Rik	10090	MGI:2442087
PPME1	72590	protein phosphatase methylesterase 1	Ppme1	1110069N17Rik, 2700017M01Rik, PME-, PME-1, Pme1	10090	MGI:1919840
PPP1CB	19046	protein phosphatase 1 catalytic subunit beta	Ppp1cb	1200010B19	10090	MGI:104871
PPP1CC	19047	protein phosphatase 1 catalytic subunit gamma	Ppp1cc	P, PP-1G, PP1, dis2m1	10090	MGI:104872
PPP1R12A	17931	protein phosphatase 1, regulatory subunit 12A	Ppp1r12a	1200015F06Rik, 5730577I22Rik, AA792106, AV099298, D10Ertd625	10090	MGI:1309528
PPP1R13B	21981	protein phosphatase 1, regulatory subunit 13B	Ppp1r13b	A, AI449786, ASPP1, AW545810, Tp53bp2	10090	MGI:1336199
PPP1R1A	58200	protein phosphatase 1, regulatory inhibitor subunit 1A	Ppp1r1a	0610038N18Rik, I-, I-1, inhib	10090	MGI:1889595
PPP1R2	66849	protein phosphatase 1, regulatory inhibitor subunit 2	Ppp1r2	0610025N14Rik, 2310007G06Rik, 4930440J04Rik, 5430408E15Rik, D16Ertd248e	10090	MGI:1914099
PPP1R7	66385	protein phosphatase 1, regulatory subunit 7	Ppp1r7	2310014J01Rik, SDS, SDS22	10090	MGI:1913635
PPP2CA	19052	protein phosphatase 2 (formerly 2A), catalytic subunit, alpha isoform	Ppp2ca	P, PP2A, R75353	10090	MGI:1321159
PPP2CB	19053	protein phosphatase 2 (formerly 2A), catalytic subunit, beta isoform	Ppp2cb	AI115466, D8Ertd766, D8Ertd766e, PP, PP2Ac	10090	MGI:1321161
PPP2R1A	51792	protein phosphatase 2, regulatory subunit A, alpha	Ppp2r1a	6330556D22Rik, P, PP2A, PR, PR65	10090	MGI:1926334
PPP2R2A	71978	protein phosphatase 2, regulatory subunit B, alpha	Ppp2r2a	2410004D02Rik, mKIAA1541	10090	MGI:1919228
PPP2R5A	226849	protein phosphatase 2, regulatory subunit B', alpha	Ppp2r5a	PR61alpha	10090	MGI:2388479
PPP2R5C	26931	protein phosphatase 2, regulatory subunit B', gamma	Ppp2r5c	2610043M05Rik, 2700063L20Rik, AI060890, AW545884, C85228	10090	MGI:1349475
PPP3CA	19055	protein phosphatase 3, catalytic subunit, alpha isoform	Ppp3ca	2900074D19Rik, C, CN, Caln, Calna	10090	MGI:107164
PPP3CB	19056	protein phosphatase 3, catalytic subunit, beta isoform	Ppp3cb	1110063J16Rik, Ca, Calnb, Cn, CnAbeta	10090	MGI:107163
PPP3R1	19058	protein phosphatase 3, regulatory subunit B, alpha isoform (calcineurin B, type I)	Ppp3r1	CaN, CaNB1, Cnb, Cnb1, MCIP1	10090	MGI:107172
PPP4R4	74521	protein phosphatase 4, regulatory subunit 4	Ppp4r4	8430415E04Rik, mKIAA1622	10090	MGI:1921771
PPP5C	19060	protein phosphatase 5, catalytic subunit	Ppp5c	AU020526, P, PP5	10090	MGI:102666
PPP6C	67857	protein phosphatase 6, catalytic subunit	Ppp6c	2310003C10Rik, Pp6C	10090	MGI:1915107
PPP6R2	71474	protein phosphatase 6, regulatory subunit 2	Ppp6r2	1110033O10Rik, 8430411H09Rik, B230107H12Rik, Pp, Pp6r2	10090	MGI:1918724
PPP6R3	52036	protein phosphatase 6, regulatory subunit 3	Ppp6r3	4930528G08Rik, 9130026N02Rik, D19Bwg1430e, D19Ertd703, D19Ertd703e	10090	MGI:1921807
PRDX6	11758	peroxiredoxin 6	Prdx6	1-Cys Prx, 1-cys, 1-cysPrx, 9430088D19Rik, AA690119	10090	MGI:894320
PRKACA	18747	protein kinase, cAMP dependent, catalytic, alpha	Prkaca	C, P, PKCD, Pk, Pkaca	10090	MGI:97592
PRKACB	18749	protein kinase, cAMP dependent, catalytic, beta	Prkacb	CbPKA, Pka, Pkacb	10090	MGI:97594
PRKAR1B	19085	protein kinase, cAMP dependent regulatory, type I beta	Prkar1b	AI385716, RIb, RIbeta	10090	MGI:97759
PRKAR2B	19088	protein kinase, cAMP dependent regulatory, type II beta	Prkar2b	AI451071, AW061005, PKAR, PKARIIbeta, Pka	10090	MGI:97760
PRKCA	18750	protein kinase C, alpha	Prkca	AI875142, Pk, Pkca	10090	MGI:97595
PRKCB	18751	protein kinase C, beta	Prkcb	PKC-B, PKC-Be, PKC-Beta, Pkc, Pkcb	10090	MGI:97596
PRKCE	18754	protein kinase C, epsilon	Prkce	5830406C15Rik, PKC[e, PKC[e], PKCepsilon, Pkc	10090	MGI:97599
PRMT1	15469	protein arginine N-methyltransferase 1	Prmt1	6720434D09Rik, AW214366, Hrmt1, Hrmt1l2, Mrmt1	10090	MGI:107846
PRMT3	71974	protein arginine N-methyltransferase 3	Prmt3	2010005E20Rik, 2410018A17Rik, AL033309, Hrmt1, Hrmt1l3	10090	MGI:1919224
PRPS1	19139	phosphoribosyl pyrophosphate synthetase 1	Prps1	2310010D17Rik, C76571, C76678, PRS-I, Pr	10090	MGI:97775
PRPSAP1	67763	phosphoribosyl pyrophosphate synthetase-associated protein 1	Prpsap1	5730409F23Rik, PA, PAP39	10090	MGI:1915013
PRPSAP2	212627	phosphoribosyl pyrophosphate synthetase-associated protein 2	Prpsap2	A230054F23Rik, PAP41	10090	MGI:2384838
PRRC1	73137	proline-rich coiled-coil 1	Prrc1	1190002C06Rik, 2310058D16Rik, 3110038B19Rik, 9430085A19Rik	10090	MGI:1916106
PRRC2A	53761	proline-rich coiled-coil 2A	Prrc2a	3110039B05Rik, Bat, Bat-, Bat-2, Bat2	10090	MGI:1915467
PRRT2	69017	proline-rich transmembrane protein 2	Prrt2	1500031I19Rik, AI195361, DSPB3	10090	MGI:1916267
PRUNE2	353211	prune homolog 2	Prune2	6330414G02Rik, A230083H22Rik, A330102H22Rik, Bmcc1, mKIAA0367	10090	MGI:1925004
PRXL2B	66469	peroxiredoxin like 2B	Prxl2b	2810405K02Rik, AI836168, Fam213, Fam213b, PM/P	10090	MGI:1913719
PSD2	74002	pleckstrin and Sec7 domain containing 2	Psd2	6330404E20Rik, AW125584, EFA6, EFA6C	10090	MGI:1921252
PSD3	234353	pleckstrin and Sec7 domain containing 3	Psd3	4931420C21Rik, AI661273, BC003498, D430018P08, EFA6	10090	MGI:1918215
PSMA4	26441	proteasome subunit alpha 4	Psma4	C9	10090	MGI:1347060
PSMC1	19179	protease (prosome, macropain) 26S subunit, ATPase 1	Psmc1	AI325227, P26, P26s4, Rpt2/S4, S	10090	MGI:106054
PSMC2	19181	proteasome (prosome, macropain) 26S subunit, ATPase 2	Psmc2		10090	MGI:109555
PSMC4	23996	proteasome (prosome, macropain) 26S subunit, ATPase, 4	Psmc4	CIP, CIP21, MIP2, MIP224	10090	MGI:1346093
PSMD13	23997	proteasome (prosome, macropain) 26S subunit, non-ATPase, 13	Psmd13	S1, S11	10090	MGI:1345192
PSMD2	21762	proteasome (prosome, macropain) 26S subunit, non-ATPase, 2	Psmd2	9430095H01Rik, AA407121, TEG-190, Tex190	10090	MGI:1096584
PSMD3	22123	proteasome (prosome, macropain) 26S subunit, non-ATPase, 3	Psmd3	AI255837, Ant, AntP91a, D11Bwg1349e, Ps	10090	MGI:98858
PSMD4	19185	proteasome (prosome, macropain) 26S subunit, non-ATPase, 4	Psmd4	Af, Af1, Mcb1, ang, angiocidin	10090	MGI:1201670
PSMD5	66998	proteasome (prosome, macropain) 26S subunit, non-ATPase, 5	Psmd5	1500032A03Rik, AW475925, S5, S5b, W91691	10090	MGI:1914248
PSMD6	66413	proteasome (prosome, macropain) 26S subunit, non-ATPase, 6	Psmd6	2400006A19Rik	10090	MGI:1913663
PSMD8	57296	proteasome (prosome, macropain) 26S subunit, non-ATPase, 8	Psmd8	6720456J22Rik, AA407360, AL033291, AL033322, AL033323	10090	MGI:1888669
PSMD9	67151	proteasome (prosome, macropain) 26S subunit, non-ATPase, 9	Psmd9	1500011J20Rik, 2610202L11Rik, Bridge, Bridge-1, P2	10090	MGI:1914401
PSME1	19186	proteasome (prosome, macropain) activator subunit 1 (PA28 alpha)	Psme1	AW413925, PA, PA28a	10090	MGI:1096367
PSMF1	228769	proteasome (prosome, macropain) inhibitor subunit 1	Psmf1	AW048666, BC012260, PI, PI31	10090	MGI:1346072
PTEN	19211	phosphatase and tensin homolog	Pten	2310035O07Rik, A130070J02Rik, AI463227, B430203M17Rik, MMAC	10090	MGI:109583
PTGES2	96979	prostaglandin E synthase 2	Ptges2	0610038H10Rik, C79137, Gbf1, Mpges2, Pges2	10090	MGI:1917592
PTGES3	56351	prostaglandin E synthase 3	Ptges3	5730442A20Rik, Ptg, Ptges, Teb, Tebp	10090	MGI:1929282
PTGR2	77219	prostaglandin reductase 2	Ptgr2	1810016I24Rik, 9130222H03Rik, 9630002F03Rik, AI838763, B830026H24Rik	10090	MGI:1916372
PTMS	69202	parathymosin	Ptms	2610009E16Rik	10090	MGI:1916452
PTPA	110854	protein phosphatase 2 protein activator	Ptpa	2610042B21Rik, C77440, N28142, PR53, Pp	10090	MGI:1346006
PTPN11	19247	protein tyrosine phosphatase, non-receptor type 11	Ptpn11	2700084A17Rik, AW536184, PTP, PTP1D, PTP2C	10090	MGI:99511
PTPN23	104831	protein tyrosine phosphatase, non-receptor type 23	Ptpn23	AI462446, PTP-TD, PTP-TD14	10090	MGI:2144837
PTPN9	56294	protein tyrosine phosphatase, non-receptor type 9	Ptpn9	MEG2	10090	MGI:1928376
PTPRD	19266	protein tyrosine phosphatase, receptor type, D	Ptprd	1110002J03Rik, 3000002J10Rik, B230219D21Rik, R-PTP-delta	10090	MGI:97812
PTPRN	19275	protein tyrosine phosphatase, receptor type, N	Ptprn	IA, IA-2, mIA-A, mKIAA4064	10090	MGI:102765
PTPRN2	19276	protein tyrosine phosphatase, receptor type, N polypeptide 2	Ptprn2	4930425H11Rik, IA-2b, IA2beta, PT, PTP-NP	10090	MGI:107418
PTPRS	19280	protein tyrosine phosphatase, receptor type, S	Ptprs	AL022616, PTP, PTP-, PTP-NU3, PTPNU-3	10090	MGI:97815
PTPRU	19273	protein tyrosine phosphatase, receptor type, U	Ptpru	Ftp-1, P, PCP-2, PTP, PTP-lambda	10090	MGI:1321151
[truncated: 422 more rows]
