# Supplementary material for: Subcellular proteomics of dopamine neurons in the mouse brain
Source: eLife. 2022 Jan 31;11:e70921. doi: 10.7554/eLife.70921 (PMC8860448; doi:10.7554/eLife.70921)
Supplement: Figure 5—source data 3. [file elife-70921-fig5-data3.xlsx]

## Sheet: Sheet1
Figure 4 -- source data 3
Protein abbreviations related to Figure 4 -- figure supplement 1b
"Both"
Abbrev. in panel b	Protein Name	Mouse Gene Symbol
DAT	Dopamine transporter	Slc6a3
VMAT2	Vesicular monoamine transporter 2	Slc18a2
CPLX1	Complexin-1	Cplx1
CPLX2	Complexin-2	Cplx2
Liprin-2α	Liprin-alpha-2	Ppfia2
STX-1A	Syntaxin-1A	Stx1a
nAchR-α4	Neuronal acetylcholine receptor subunit alpha-4	Chrna4
nAchR-β2	Neuronal acetylcholine receptor subunit beta-2	Chrnb2
CALB1	Calbindin	Calb1
GAPDH	Glyceraldehyde-3-phosphate dehydrogenase	Gapdh
VDAC1	Voltage-dependent anion-selective channel protein 1	Vdac1
NaV1.6	NaV 1.6 subunit alpha	Scn8a
ATP1A3	Sodium/potassium-transporting ATPase subunit alpha-3	Atp1a3
Clathrin LC A	Clathrin light chain A	Clta
Endophilin-A1	Endophilin-A1	Sh3gl2
Endophilin-A2	Endophilin-A2	Sh3gl1
DNM-3	Dynamin-3	Dnm3
Profilin-1	Profilin-1	Pfn1
Profilin-2	Profilin-2	Pfn2
ADD-α	Alpha-adducin	Add1
ADD-β	Beta-adducin	Add2
ADD-γ	Gamma-adducin	Add3
"Post-only removed"
Abbrev. in panel b	Protein Name	Mouse Gene Symbol
α2-spectrin	Spectrin alpha chain, non-erythrocytic 1	Sptan1
β2-spectrin	Spectrin beta chain, non-erythrocytic 1	Sptbn1
RAC1	Ras-related C3 botulinum toxin substrate 1	Rac1
β-actin	Actin, cytoplasmic 1	Actb
Cortactin	Src substrate cortactin	Cttn
WASF1	Wiskott-Aldrich syndrome protein family member 1	Wasf1
WASF3	Wiskott-Aldrich syndrome protein family member 3	Wasf3
Eps8	Epidermal growth factor receptor kinase substrate 8	Eps8
Rhoa	Transforming protein RhoA	Rhoa
CDK5	Cyclin-dependent-like kinase 5	Cdk5
ARP2	Actin-related protein 2	Actr2
DLC1	Dynein light chain 1, cytoplasmic	Dynll1
PAK-1	Serine/threonine-protein kinase PAK 1	Pak1
PAK-3	Serine/threonine-protein kinase PAK 3	Pak3
14-3-3ζ	14-3-3 protein zeta/delta	Ywhaz
LASP-1	LIM and SH3 domain protein 1	Lasp1
BCR	Breakpoint cluster region protein	Bcr
Abi-2	Abl interactor 2	Abi2
NAP 1	Nck-associated protein 1	Nckap1
CAPZ-β	F-actin-capping protein subunit beta	Capzb
TAOK2	Serine/threonine-protein kinase TAO2	Taok2
Myo10	Unconventional myosin-X	Myo10
Calponin-3	Calponin-3	Cnn3
AC-1	Adenylate cyclase type 1	Adcy1
PKA-R-1β	cAMP-dependent protein kinase type I-beta regulatory subunit	Prkar1b
PKA-R-2β	cAMP-dependent protein kinase type II-beta regulatory subunit	Prkar2b
CAMK-IV	Calcium/calmodulin-dependent protein kinase type IV	Camk4
RHEB	GTP-binding protein Rheb	Rheb
MTOR	Serine/threonine-protein kinase mTOR	Mtor
TSC1	Hamartin	Tsc1
TSC2	Tuberin	Tsc2
PTEN	Phosphatidylinositol 3,4,5-trisphosphate 3-phosphatase and dual-specificity protein phosphatase PTEN	Pten
DCC	Netrin receptor DCC	Dcc
mGluR1	Metabotropic glutamate receptor 1	Grm1
Nogo-A	Reticulon-4	Rtn4
NEDD4	E3 ubiquitin-protein ligase NEDD4	Nedd4
MEK-1	Dual specificity mitogen-activated protein kinase kinase 1	Map2k1
ERK2	Mitogen-activated protein kinase 1	Mapk1
EPAC2	Rap guanine nucleotide exchange factor 4	Rapgef4
DNM-2	Dynamin-2	Dnm2
GSK-3β	Glycogen synthase kinase-3 beta	Gsk3b
Kv-β2	Voltage-gated potassium channel subunit beta-2	Kcnab2
SLC8A1	Sodium/calcium exchanger 1	Slc8a1
SLC8A2	Sodium/calcium exchanger 2	Slc8a2
"Post-only retained"
Abbrev. in panel b	Protein Name	Mouse Gene Symbol
MAP2	Microtubule-associated protein 2	Map2
PSD95	Disks large homolog 4	Dlg4
SAP97	Disks large homolog 1	Dlg1
SAPAP-4	Disks large-associated protein 4	Dlgap4
Synaptopodin	Synaptopodin	Synpo
Shank1	SH3 and multiple ankyrin repeat domains protein 1	Shank1
Shank2	SH3 and multiple ankyrin repeat domains protein 2	Shank2
Neuroligin-1	Neuroligin-1	Nlgn1
Drebrin 1	Drebrin	Dbn1
AGAP2	Arf-GAP with GTPase, ANK repeat and PH domain-containing protein 2	Agap2
AGAP3	Arf-GAP with GTPase, ANK repeat and PH domain-containing protein 3	Agap3
Catenin-delta 2	Catenin delta-2	Ctnnd2
ABR	Active breakpoint cluster region-related protein	Abr
CAMK1	Calcium/calmodulin-dependent protein kinase type 1	Camk1
CAMK2β	Calcium/calmodulin-dependent protein kinase type II subunit beta	Camk2b
MAGI-2	Membrane-associated guanylate kinase, WW and PDZ domain-containing protein 2	Magi2
F-box only protein 2	F-box only protein 2	Fbxo2
SPAR	Signal-induced proliferation-associated 1-like protein 1	Sipa1l1
CNKSR2	Connector enhancer of kinase suppressor of ras 2	Cnksr2
FXR1	Fragile X mental retardation syndrome-related protein 1	Fxr1
CYFIP1	Cytoplasmic FMR1-interacting protein 1	Cyfip1
hnRNP E1	Poly(rC)-binding protein 1	Pcbp1
hnRNP X	Poly(rC)-binding protein 2	Pcbp2
Pur-alpha	Transcriptional activator protein Pur-alpha	Pura
hnRNP K	Heterogeneous nuclear ribonucleoprotein K	Hnrnpk
hnRNP A3	Heterogeneous nuclear ribonucleoprotein A3	Hnrnpa3
CPEB3	Cytoplasmic polyadenylation element-binding protein 3	Cpeb3
EIF4B	Eukaryotic translation initiation factor 4B	Eif4b
EIF4E	Eukaryotic translation initiation factor 4E	Eif4e
EIF4EBP2	Eukaryotic translation initiation factor 4E-binding protein 2	Eif4ebp2
EIF3E	Eukaryotic translation initiation factor 3 subunit E	Eif3e
EIF4G1	Eukaryotic translation initiation factor 4 gamma 1	Eif4g1
mGluR5	Metabotropic glutamate receptor 5	Grm5
GRIP1	Glutamate receptor-interacting protein 1	Grip1
GRIPAP1	GRIP1-associated protein 1	Gripap1
