# Supplementary material for: Subcellular proteomics of dopamine neurons in the mouse brain
Source: eLife. 2022 Jan 31;11:e70921. doi: 10.7554/eLife.70921 (PMC8860448; doi:10.7554/eLife.70921)
Supplement: Figure 6—source data 1. [file elife-70921-fig6-data1.xlsx]

## Sheet: Sheet1
Figure 5 -- source data 1
Mouse DA neuronal marker genes, corresponding mouse proteins, and protein abbreviations shown in Figure 5b
			scRNA-seq		APEX2 Proteomics
Abbrev. in panel b	Protein Name	Mouse Gene Symbol	Log2 DA Neuron Enrichment	DA Neuron Enrichment FDR	Log2 Fold Change (Str/VM)	p-value (Str vs. VM)	FDR (Str vs. VM)
NVP-2	Hippocalcin-like protein 4 (Neural visinin-like protein 2)	Hpcal4	3.13041	4.10841e-64	-0.857928	0.0708805	0.132426
Cadherin-13	Cadherin-13	Cdh13	3.04049	4.07845e-59	-inf	0.0045017	0.0205942
BRSP-B	Seizure 6-like protein (Brain-specific receptor-like protein B)	Sez6l	3.01634	2.21823e-91	-inf	1.50286e-05	0.00215051
NRIP3	Nuclear receptor-interacting protein 3	Nrip3	3.18726	5.84248e-112	-2.54879	3.01589e-05	0.00241353
NTR1	Neurotensin receptor type 1	Ntsr1	5.99141	1.20137e-60	-1.45239	0.00357751	0.0178224
GIRK-2	G protein-activated inward rectifier potassium channel 2 (Kir3.2)	Kcnj6	6.15963	3.80948e-16	-0.886148	0.0153495	0.0452818
Kv4.3	Potassium voltage-gated channel subfamily D member 3	Kcnd3	3.22396	1.22213e-127	-0.197482	0.917877	0.932048
ANKRD34B	Ankyrin repeat domain-containing protein 34B	Ankrd34b	3.65898	5.60939e-79	0.0442084	0.996361	0.997395
Calbindin	Calbindin	Calb1	3.72296	5.15152e-40	0.228309	0.854245	0.882608
Copine-7	Copine-7	Cpne7	4.39713	1.14626e-213	0.148816	0.717804	0.771666
STEP	Tyrosine-protein phosphatase non-receptor type 5	Ptpn5	3.44312	1.85083e-96	0.189848	0.502716	0.57459
PLCXD3	PI-PLC X domain-containing protein 3	Plcxd3	3.52475	2.67031e-20	-0.838601	0.452757	0.526639
SCN-3B	Sodium channel subunit beta-3	Scn3b	3.24924	4.53992e-62	1.35681	0.211665	0.299321
GC-C	Guanylyl cyclase C (Heat-stable enterotoxin receptor)	Gucy2c	9.62964	8.08598e-44	2.01282	0.0703152	0.131796
PEG11	Retrotransposon-like protein 1	Rtl1	3.3945	3.02456e-34	0.855657	0.0997171	0.167975
nAchR-beta2	Neuronal acetylcholine receptor subunit beta-2	Chrnb2	3.08179	2.70562e-19	1.22517	0.0463177	0.0988081
DRP-5	Dihydropyrimidinase-related protein 5	Dpysl5	3.34247	7.81721e-32	0.799763	0.085247	0.1497
SLC10A4	Sodium/bile acid cotransporter 4	Slc10a4	7.69924	2.17507e-142	2.24259	0.0444729	0.0959696
Caspr4	Contactin-associated protein-like 4	Cntnap4	3.11907	4.98355e-22	1.4724	0.00797366	0.0296774
TIGAR	Fructose-2,6-bisphosphatase TIGAR	Tigar	3.68742	6.25951e-48	2.90905	0.0399794	0.0884559
Cav2.2	Voltage-dependent N-type calcium channel subunit alpha-1B	Cacna1b	3.53852	2.95631e-49	1.58654	0.0109735	0.0367137
SK3	Small conductance calcium-activated potassium channel protein 3	Kcnn3	3.14899	3.26434e-35	1.28533	0.00879356	0.0316919
GTP-CH-1	GTP cyclohydrolase 1	Gch1	3.13793	1.3036e-28	3.7901	0.0152551	0.0450951
Cav2.3	Voltage-dependent R-type calcium channel subunit alpha-1E	Cacna1e	3.04983	2.23208e-84	1.68446	0.0223785	0.0590369
CAPS2	Calcium-dependent secretion activator 2	Cadps2	4.61466	1.3469e-78	1.39258	0.00416004	0.0196718
NWD2	NACHT and WD repeat domain-containing protein 2	Nwd2	5.00004	6.4321e-91	2.47342	0.00360051	0.0178224
KANK4	KN motif and ankyrin repeat domain-containing protein 4	Kank4	4.19939	9.9413e-22	2.75149	0.00246367	0.0141185
GPR26	G-protein coupled receptor 26	Gpr26	3.71781	1.85229e-44	inf	0.00107048	0.00880108
mLAT2	Large neutral amino acids transporter small subunit 2	Slc7a8	4.1517	8.3762e-11	2.04095	4.72396e-05	0.00241353
Complexin-1	Complexin-1	Cplx1	3.71854	4.71058e-251	2.06786	0.00174561	0.0114036
γ-synuclein	γ-synuclein	Sncg	3.08924	4.22221e-104	2.80461	0.00155833	0.0106185
α-synuclein	α-synuclein	Snca	3.52665	5.89481e-90	3.82943	0.00096191	0.00828502
Complexin-2	Complexin-2	Cplx2	3.21135	5.7206e-222	3.14847	0.000854605	0.00780198
ALDH1A7	Aldehyde dehydrogenase, cytosolic 1	Aldh1a7	5.45472	1.39452e-10	2.86103	0.000775205	0.0075281
SV2B	Synaptic vesicle glycoprotein 2B	Sv2b	3.39679	9.32416e-41	3.59344	2.61197e-05	0.00241353
Syntaxin-1A	Syntaxin-1A	Stx1a	3.33996	1.88767e-11	1.97818	0.000390612	0.00558556
nAchR-alpha4	Neuronal acetylcholine receptor subunit alpha-4	Chrna4	4.21314	1.33468e-144	1.60683	0.00453332	0.0205942
TMEM-255a	Transmembrane protein 255A	Tmem255a	3.53567	2.51603e-58	inf	0.00180911	0.0116415
SV2C	Synaptic vesicle glycoprotein 2C	Sv2c	5.17919	3.19422e-102	3.97398	3.72549e-05	0.00241353
TH	Tyrosine hydroxylase	Th	5.91993	0	2.29198	3.93862e-05	0.00241353
RAB-3C	Ras-related protein Rab-3C	Rab3c	3.37726	1.14274e-282	3.58859	3.95051e-05	0.00241353
ELKS2	ERC protein 2	Erc2	3.91288	1.45145e-152	4.19369	4.70196e-05	0.00241353
GPR158	Probable G-protein coupled receptor 158	Gpr158	3.39059	7.05002e-43	3.5223	1.65863e-05	0.00215051
PTPRU	Receptor-type tyrosine-protein phosphatase U	Ptpru	3.8816	1.11074e-48	inf	5.89308e-05	0.00242592
SYT-1	Synaptotagmin-1	Syt1	3.59425	0	3.52133	0.00011151	0.00310375
NUMBL	Numb-like protein	Numbl	3.03888	1.888e-16	2.11414	0.000270576	0.00469029
PKC-alpha	cAMP-dependent protein kinase catalytic subunit alpha	Prkca	3.00111	5.38845e-87	1.5897	0.000482003	0.00596119
NYAP2	Neuronal tyrosine-phosphorylated phosphoinositide-3-kinase adapter 2	Nyap2	5.10763	2.17239e-19	2.1463	0.000786362	0.00755048
AADC	Aromatic-L-amino-acid decarboxylase	Ddc	3.62065	6.93134e-225	1.83549	0.00206613	0.0125882
VAT1L	Synaptic vesicle membrane protein VAT-1 homolog-like	Vat1l	3.28782	2.64209e-39	2.0226	0.0011941	0.00939057
RET	Proto-oncogene tyrosine-protein kinase receptor Ret	Ret	5.38172	2.73163e-267	2.75756	0.000284802	0.00476426
Bassoon	Protein bassoon	Bsn	3.43226	2.30804e-58	4.33306	0.000146879	0.00357201
DAT	Sodium-dependent dopamine transporter	Slc6a3	5.66079	0	2.86982	8.4996e-05	0.00279521
SLC8A2	Sodium/calcium exchanger 2	Slc8a2	3.73371	1.23339e-12	2.64628	0.000260191	0.00462581
SYT-17	Synaptotagmin-17	Syt17	4.79492	2.00841e-14	3.76329	0.000208908	0.00415625
