# Supplementary figures and images for: Subcellular proteomics of dopamine neurons in the mouse brain
Source: eLife journal article supplement (doi:10.7554/elife.70921), 2022-01-31

# Figure 1d Western Blots

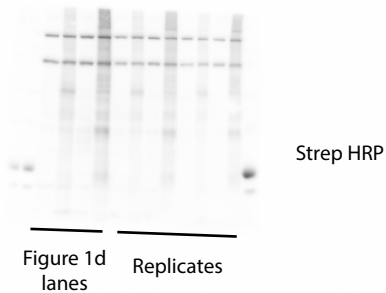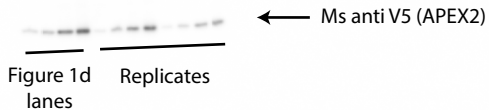

Supplement: fig1-data1 [file Figure1d_LabeledBlots.pdf › Figure1d_LabeledBlots.pdf]

## Figure 2b Western Blots

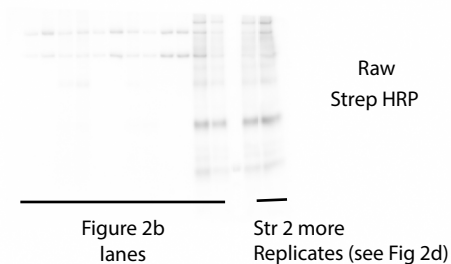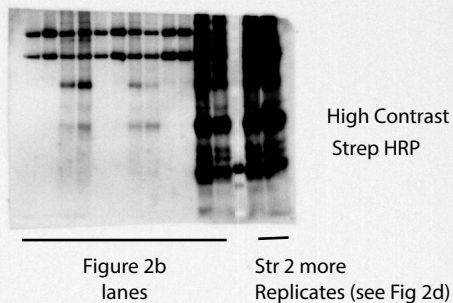

Supplement: fig2-data6 [file elife-70921-fig2-data6-v2.zip]
